# Supplementary material for: Conserved allosteric inhibition mechanism in SLC1 transporters
Source: eLife. 2023 Mar 1;12:e83464. doi: 10.7554/eLife.83464 (PMC10017108; doi:10.7554/eLife.83464)
Supplement: Figure 3—figure supplement 1—source data 1. [file elife-83464-fig3-figsupp1-data1.xlsx]

## Sheet: Sheet1
Figure S2 original data		EAAT1-UCPH Voltage Dependence
Figure S2A	Glu only control												Figure S2B	Glu-ucph												Figure S2C	current-voltage relationship
		Current(pA)																											Relative Current (n=19)
		Time (ms)	trace1	trace2	trace3	trace4	trace5	trace6	trace7	trace8	trace9				Time (ms)	trace1	trace2	trace3	trace4	trace5	trace6	trace7	trace8	trace9			500uM Glu only control	Voltage (mV)	exp1	exp2	exp3	exp4	exp5	exp6	exp7	exp8	exp9	exp10	exp11	exp12	exp13	exp14	exp15	exp16	exp17	exp18	exp19		ave
		0	-22.5	-24	-24.5	-22	-22	-20	-21	-18.5	-20.5				0	1.5	0	-1	-1	-1	1.5	1	1	1.5				-100	-1	-1	-1	-1	-1	-1	-1	-1	-1		-1	-1			-1						-1
		0.04	-23.5	-24	-23.5	-21.5	-23	-20.5	-21	-19	-21				0.04	0.5	-0.5	-1	0.5	0	0	2	0.5	0.5				-80	-0.80915	-0.80158	-0.78307	-0.80869	-0.85593	-0.81779	-0.83361	-0.81222	-0.82818		-0.76724	-0.81167			-0.86528						-0.8162
		0.08	-25	-25	-22.5	-22.5	-23.5	-21	-20.5	-19.5	-21				0.08	-0.5	-1	-1	0	1	2	2.5	0	0.5				-60	-0.618	-0.6078	-0.59663	-0.624	-0.69719	-0.63645	-0.67498	-0.63224	-0.65317		-0.56379	-0.62874			-0.71245						-0.63712
		0.12	-25.5	-24.5	-21.5	-24	-22.5	-20	-20	-20.5	-20.5				0.12	0.5	-1	-0.5	-0.5	0.5	4	2	0	2				-40	-0.46297	-0.43488	-0.42578	-0.46534	-0.54719	-0.47503	-0.52811	-0.47127	-0.48521		-0.39352	-0.46569			-0.56034						-0.47628
		0.16	-25.5	-25	-22.5	-23.5	-21.5	-20	-19	-20.5	-20.5				0.16	1	-0.5	-1	0	1	4	3	1	3.5				-20	-0.33763	-0.29378	-0.29185	-0.322	-0.40422	-0.34122	-0.3925	-0.32865	-0.33284		-0.26114	-0.32739			-0.42082						-0.33784
		0.2	-26	-25	-23	-22.5	-21	-20	-18.5	-20.5	-20.5				0.2	0.5	-0.5	-1.5	0.5	1	3.5	2.5	2	3.5				0	-0.24195	-0.17069	-0.17175	-0.18748	-0.28087	-0.22087	-0.27488	-0.19796	-0.20664		-0.16162	-0.22292			-0.30145						-0.21992
		0.24	-25	-24.5	-23	-22	-20.5	-19.5	-19	-20	-21				0.24	-1	-0.5	-1.5	-0.5	0.5	3.5	2	1	1				20	-0.16007	-0.08926	-0.10104	-0.10228	-0.17228	-0.10616	-0.15148	-0.01331	-0.10632		-0.08705	-0.12403			-0.19891						-0.11768
		0.28	-25	-23	-24	-21.5	-20	-19.5	-19.5	-19.5	-20.5				0.28	-0.5	0	-1.5	0	0.5	3	1.5	1	0.5				40	-0.12851	-0.03217	-0.06121	-0.05164	-0.10368	-0.03294	-0.0736	0.07616	-0.03098		-0.04192	-0.04565			-0.13547						-0.05513
		0.32	-25.5	-23.5	-23.5	-21.5	-20.5	-20.5	-20	-19	-20.5				0.32	-1	0	-1.5	0.5	0.5	2.5	2	1.5	0.5				60	-0.10124	-0.01689	-0.01286	-0.01945	-0.04706	0.02378	-0.03363	0.105021	0.016182		-0.0194	0.005721			-0.07262						-0.01437
		0.36	-25.5	-24.5	-21.5	-22	-20.5	-20.5	-20.5	-19	-21				0.36	-0.5	-0.5	0	0	0	1	2.5	1.5	0.5
		0.4	-24	-25	-22.5	-23	-20	-20.5	-20.5	-20.5	-22.5				0.4	0	-1	0.5	-0.5	0	0.5	1.5	1.5	1			500uM Glu+50uM UCPH	-100	-0.07576		-0.05399		0.088237	0.197884	-0.18009	-0.14327	0.102384	0.222179	0.239653	0.195905	0.313163	0.109281	0.302094	0.375136	0.120656	0.207619	0.277842		0.135231
		0.44	-24	-23.5	-23	-23.5	-20	-19.5	-20	-21.5	-24				0.44	1	-0.5	1.5	-1	0	2	1.5	0.5	0.5				-80	-0.12195		-0.09755		-0.00689	0.07598	-0.16457	-0.17181	0.033532	0.1161	0.131079	0.07665	0.161137	0.002553	0.159841	0.211735	0.037371	0.098165	0.156026		0.041024
		0.48	-24.5	-23	-23	-23	-20.5	-20	-20	-21	-23.5				0.48	1.5	0.5	1	0.5	-0.5	2	0.5	0.5	0.5				-60	-0.12062		-0.10709		-0.0433	0.017438	-0.12917	-0.1475	0.001694	0.060122	0.071924	0.013226	0.076768	-0.04734	0.076447	0.115451	-0.01572	0.038082	0.082212		-0.00338
		0.52	-25.5	-23	-23	-23	-22	-19	-19	-20.5	-22				0.52	1	0.5	0.5	0.5	-0.5	2.5	1.5	0	1				-40	-0.11131		-0.09913		-0.05697	-0.01048	-0.09087	-0.11222	-0.01048	0.028521	0.040091	-0.01629	0.025806	-0.06314	0.026224	0.057246	-0.03944	0.002278	0.036887		-0.02313
		0.56	-26.5	-24	-24.5	-23.5	-22	-19.5	-19.5	-19.5	-21				0.56	-0.5	0	-1	-0.5	0	2.5	1	-0.5	1				-20	-0.08355		-0.08382		-0.05165	-0.0168	-0.05331	-0.06404	-0.00733	0.017202	0.030024	-0.03064	0.001399	-0.05553	0.007587	0.031968	-0.04519	-0.01357	0.006346		-0.02417
		0.6	-26.5	-25	-24.5	-23.5	-22	-19.5	-20	-19	-21				0.6	-0.5	-0.5	-1	-1.5	1	1.5	1	0.5	0				0	-0.05387		-0.06324		-0.03148	-0.00908	-0.02237	0.055274	0.001305	0.0175	0.019096	-0.02017	-0.00271	-0.03322	0.015047	0.025675	-0.04343	-0.01542	-0.00938		-0.01003
		0.64	-25.5	-24.5	-24.5	-22.5	-22.5	-20	-21	-18.5	-21.5				0.64	0	0	-1.5	-1.5	0	0.5	0	1	0.5				20	-0.02787		-0.04559		0.005192	0.030538	0.002827	0.108064	0.004567	0.014164	0.024297	0.001918	0.017635	0.069166	0.085154	0.108301	-0.02922	-0.0079	-0.01461		0.02039
		0.68	-25.5	-25	-24.5	-22	-22	-20	-20	-18	-22.5				0.68	0	-1	-2	-1.5	0	0.5	1	0.5	0.5				40	-0.01996		-0.03414		0.052109	0.053177	0.023838	0.157002	0.010547	0.011981	0.007981	0.05567	0.075783	0.154171	0.163338	0.194451	-0.02549	-0.00177	-0.02048		0.050483
		0.72	-25	-27	-24	-21.5	-21	-20.5	-20	-18	-23				0.72	1	-2.5	-0.5	-0.5	0	0.5	0.5	-0.5	1				60	-0.02713		-0.01003		0.059092	0.073843	0.029494	0.119714	-0.00272	0.003067	0.009202	0.054833	0.111545	0.189609	0.193382	0.236375	-0.017	0.005391	-0.01348		0.059717
		0.76	-25	-26.5	-24.5	-22	-20.5	-20.5	-20.5	-19	-23				0.76	2	-2.5	-0.5	-0.5	0.5	1	-0.5	-1	1
		0.8	-25	-25.5	-23.5	-22	-20.5	-20.5	-21	-19	-22.5				0.8	1.5	-2	-0.5	-0.5	0.5	2	-0.5	0.5	0.5
		0.84	-25	-24	-23	-23.5	-20.5	-20	-21	-19	-20.5				0.84	0.5	-0.5	-0.5	-1	0.5	2.5	0.5	1.5	1
		0.88	-24.5	-24.5	-22.5	-24.5	-21.5	-20	-19.5	-19	-20.5				0.88	0	-0.5	-0.5	-1.5	0.5	2.5	2	1	2.5
		0.92	-25	-24.5	-22.5	-23.5	-21	-19.5	-19.5	-19.5	-22.5				0.92	0	-0.5	-0.5	-1	0.5	2	2.5	1	2
		0.96	-26	-22.5	-23	-23.5	-21	-21	-20.5	-19.5	-23				0.96	0.5	1	-0.5	-1	-0.5	2	1	0.5	2
		1	-25.5	-22	-23.5	-24.5	-20.5	-22	-20	-18.5	-23				1	0.5	2	-0.5	-1	0	1	2	2	1
		1.04	-25	-21.5	-24	-24	-20.5	-22	-20	-18.5	-21.5				1.04	0.5	1	-1	-0.5	0.5	1	2.5	3	0.5
		1.08	-24	-22.5	-23.5	-25	-20	-21	-20	-19.5	-20				1.08	0	0.5	0	-1.5	2	2.5	2.5	2.5	2
		1.12	-24.5	-23	-23.5	-24	-22	-21	-20	-19	-21.5				1.12	-0.5	0	0	-1	1	2.5	2	2	2
		1.16	-24.5	-23	-23.5	-24.5	-23	-20.5	-21	-19	-22				1.16	0	-0.5	0	-1	0.5	1.5	0.5	1	0.5
		1.2	-25.5	-24	-22.5	-25	-23	-21	-21.5	-19	-22				1.2	0	-1	-0.5	-1.5	0.5	0.5	-0.5	1.5	1.5
		1.24	-26.5	-26	-21.5	-24.5	-21.5	-21.5	-22	-19.5	-21.5				1.24	-0.5	-2	0.5	-1	1	0.5	0	1.5	2
		1.28	-26.5	-25.5	-22.5	-23	-21	-22	-22	-19	-21				1.28	0	-2.5	0.5	0.5	0	1	0.5	1	2.5
		1.32	-26	-24	-23.5	-22.5	-20.5	-21.5	-21.5	-18	-21.5				1.32	0.5	-2	-0.5	0.5	1	0.5	1	1.5	3
		1.36	-25	-22	-24.5	-22	-21.5	-21	-21.5	-18	-22.5				1.36	1	-1	-1.5	0.5	1	1.5	0.5	1	2.5
		1.4	-26	-23	-24	-23.5	-21.5	-21	-21	-19.5	-22.5				1.4	1.5	-1.5	0	0	1	1.5	0	0.5	2
		1.44	-25.5	-23.5	-22	-24	-21	-20	-20.5	-20.5	-22				1.44	1.5	-1	1	-0.5	1	2.5	0	0.5	2
		1.48	-25	-25	-21	-24.5	-21	-19.5	-19.5	-20	-22.5				1.48	1	-1	1	-1	0	1.5	0	1	1
		1.52	-24.5	-24	-21.5	-24.5	-22	-21	-18.5	-19.5	-23.5				1.52	1	0	1	-2	-0.5	1.5	1	1.5	-0.5
		1.56	-25	-23.5	-22	-23.5	-20.5	-21.5	-19	-19.5	-23.5				1.56	1	0	-0.5	-2.5	1	1.5	1.5	1	-0.5
		1.6	-25	-23.5	-22.5	-22.5	-20	-20.5	-21	-19	-24				1.6	0.5	-1	-1.5	-1	1.5	1	0.5	2	0.5
		1.64	-26	-24.5	-24	-23	-20.5	-20	-21.5	-18.5	-23				1.64	-1	-2	-1	-1.5	1	2	-0.5	2	1
		1.68	-25	-24.5	-24.5	-24	-20.5	-20	-21	-18.5	-22				1.68	0	-1	0	-1.5	1	2.5	0	1.5	0.5
		1.72	-25	-24	-23.5	-25	-21.5	-19.5	-19	-18.5	-20.5				1.72	1	1	0.5	-2	-1	2.5	0.5	0.5	0
		1.76	-24.5	-22	-22.5	-24	-22.5	-20	-18.5	-19	-20				1.76	1.5	2	0	-1.5	-1	2.5	0	0	0.5
		1.8	-25	-21.5	-21.5	-23	-21	-21	-19	-19	-21				1.8	1	1.5	-0.5	-1	0.5	0.5	0	0.5	1
		1.84	-26	-21.5	-22	-23	-19.5	-22	-20	-19	-21				1.84	1	1.5	-0.5	-1	1	0	0	1.5	1.5
		1.88	-26.5	-22.5	-23.5	-23	-19.5	-22.5	-21	-19.5	-21.5				1.88	0.5	1.5	-2	-1.5	0.5	0	0	1	2.5
		1.92	-25.5	-23.5	-25	-22.5	-21	-22	-22	-20	-21				1.92	0.5	0.5	-2.5	-1.5	0	1.5	-1.5	1	3.5
		1.96	-23.5	-24	-24	-23	-22	-19.5	-22.5	-20	-21				1.96	0.5	0	-1.5	-1.5	-1	3.5	-1.5	1.5	3
		2	-23.5	-23.5	-23	-23.5	-21	-19	-22.5	-20.5	-21				2	0	0	-1	-1.5	-1	3.5	-0.5	1	2.5
		2.04	-24	-23	-23	-23	-22	-20.5	-22	-20.5	-20.5				2.04	0.5	0	-0.5	0	-0.5	1.5	0.5	0	2.5
		2.08	-24	-22.5	-24	-23.5	-21.5	-21	-21	-20.5	-21				2.08	1	-0.5	-1	0	0	1.5	1	-0.5	2
		2.12	-23.5	-23	-23.5	-24.5	-22	-20.5	-19.5	-20.5	-22.5				2.12	0.5	-0.5	-1.5	-1	0.5	2.5	1	0.5	0
		2.16	-24.5	-24	-23	-24	-22	-20.5	-19.5	-20	-23.5				2.16	0	-0.5	-1.5	-1	0	2.5	1.5	0.5	-0.5
		2.2	-25.5	-25	-22.5	-24	-21.5	-19.5	-19.5	-20	-21.5				2.2	-0.5	-1	-0.5	-1.5	1	3	0.5	1	1.5
		2.24	-24.5	-25	-22.5	-24.5	-21.5	-21.5	-19	-21	-21.5				2.24	-1	-1	0.5	-0.5	0.5	2	0.5	1	2
		2.28	-23.5	-26	-23.5	-24.5	-22.5	-21.5	-18	-21.5	-21.5				2.28	0	-1	1	0	-0.5	1	2	0	2
		2.32	-23	-25.5	-23.5	-24	-22.5	-22	-19.5	-20.5	-21.5				2.32	2	-0.5	1	-0.5	0	-0.5	2	0	2
		2.36	-24	-24.5	-23.5	-23	-22.5	-23	-20	-19	-21.5				2.36	1.5	-2	0	0	0.5	-1	1.5	2	1.5
		2.4	-26	-23.5	-23	-23	-22.5	-22	-21	-19.5	-21.5				2.4	0.5	-1.5	-1	-0.5	0.5	0.5	1	1.5	1.5
		2.44	-27	-24	-22.5	-23.5	-22	-21.5	-22	-20	-20.5				2.44	-0.5	-0.5	-1	-1.5	1	0.5	0	0.5	3.5
		2.48	-26	-24.5	-22.5	-23.5	-22	-22	-22.5	-20	-20				2.48	-1.5	0	-1	-1.5	0.5	0.5	-0.5	-0.5	4
		2.52	-24.5	-23	-23.5	-23.5	-22	-21	-22	-19	-21.5				2.52	0	1	-2	-1	-0.5	1	0.5	0.5	2.5
		2.56	-24.5	-23	-23.5	-23.5	-21	-22	-19.5	-19.5	-22				2.56	-0.5	0	-2	-0.5	0	2	2	0.5	2
		2.6	-25	-23.5	-23.5	-24	-21	-21.5	-19.5	-20	-23				2.6	-0.5	-0.5	-0.5	-0.5	0.5	2.5	1.5	0.5	1
		2.64	-26	-23.5	-23.5	-22	-21	-21	-20.5	-19.5	-22				2.64	-1	0	-1	0.5	0	2.5	0.5	2	0.5
		2.68	-25.5	-23	-24.5	-21	-21.5	-22	-22	-19.5	-21				2.68	-1	1.5	-2.5	1	-1	1.5	-1.5	2	0
		2.72	-25	-22.5	-24.5	-22.5	-21	-22	-21.5	-19	-20.5				2.72	-1	1	-1.5	0.5	0	1.5	-0.5	1.5	-1
		2.76	-24.5	-22	-24.5	-23.5	-21	-21	-20.5	-19.5	-20.5				2.76	0	0.5	-0.5	0.5	0.5	2	0	1	-0.5
		2.8	-24.5	-23	-23.5	-22.5	-21.5	-20	-20	-20	-20				2.8	0.5	-0.5	0.5	0.5	-0.5	4	1	0	0.5
		2.84	-25	-24	-22.5	-23	-21	-20	-21	-19.5	-20				2.84	0.5	-1	1	0.5	-1	2.5	1.5	0.5	2
		2.88	-24.5	-23.5	-23.5	-24.5	-21.5	-20.5	-23	-19.5	-20				2.88	0.5	-0.5	1	-0.5	-0.5	1.5	0.5	0	3
		2.92	-23.5	-23	-24	-24.5	-21	-21.5	-22	-19	-20				2.92	1.5	1	0	-1	0.5	1	0.5	-1	3
		2.96	-22.5	-23.5	-23	-24	-21	-21.5	-20.5	-18.5	-21.5				2.96	2.5	1	-0.5	-2	2	1	1	-0.5	3
		3	-22.5	-23.5	-21.5	-23.5	-21	-21.5	-19	-18.5	-21				3	2	1.5	0	-2	2.5	1	2	-0.5	2.5
		3.04	-22.5	-23.5	-21.5	-23	-21	-22	-19	-19.5	-21				3.04	1	0.5	1	-1	1	1	1.5	-1	2
		3.08	-23.5	-23	-22	-24	-21	-22.5	-21.5	-20	-21				3.08	1	-0.5	0.5	-1.5	0.5	1	0	-0.5	2
		3.12	-25	-24	-22.5	-24	-22	-21.5	-21.5	-20	-21				3.12	0.5	-0.5	0	-1	0	1	-0.5	0.5	2
		3.16	-26	-25.5	-23.5	-22.5	-22.5	-21.5	-21.5	-19	-20				3.16	0.5	-1	-1.5	0	-0.5	0.5	-1	2.5	3
		3.2	-26	-25	-23	-22.5	-22	-21.5	-21	-18	-20.5				3.2	-0.5	0	-1.5	0.5	-1	2	0	2.5	1.5
		3.24	-26.5	-23	-23	-23	-22.5	-21	-19.5	-18.5	-21.5				3.24	-2	1	-1	0	-2	2.5	1	2.5	0
		3.28	-24.5	-23	-23	-24	-21.5	-19.5	-20	-20.5	-22				3.28	-2	0.5	-1	-2	-1	3.5	1	1	-1
		3.32	-24.5	-25	-22.5	-24	-20	-20	-21	-21.5	-21.5				3.32	-1.5	-1	-1.5	-2.5	0	2.5	1.5	-0.5	-1
		3.36	-23	-25	-22.5	-23.5	-21	-21	-21	-20.5	-21.5				3.36	-0.5	-1.5	-0.5	-1.5	1	3	1	-0.5	0.5
		3.4	-23	-24.5	-23.5	-22	-21.5	-21	-21	-20	-21				3.4	0.5	-1	-1	0	0	3	1	0	1
		3.44	-24.5	-24	-24	-23	-21.5	-20.5	-19.5	-19.5	-21				3.44	0.5	0	-1	-0.5	-1	2.5	0	0.5	1.5
		3.48	-25	-23	-22.5	-23.5	-19.5	-21.5	-19	-18.5	-21.5				3.48	1	1	-0.5	-1	0.5	1.5	0	1.5	1
		3.52	-24.5	-22.5	-22	-24	-20.5	-21.5	-19.5	-18	-21.5				3.52	0.5	1	1.5	-1.5	0.5	1.5	0	2	1
		3.56	-24	-22	-20.5	-24	-22	-21.5	-19	-18.5	-21.5				3.56	0	0.5	2.5	-2	0.5	1	1.5	1.5	1
		3.6	-24	-22.5	-20	-23.5	-21.5	-22.5	-18.5	-19.5	-21				3.6	0.5	-0.5	2	-1	0.5	1	1.5	0.5	1
		3.64	-23	-24	-21.5	-22.5	-20	-21.5	-19.5	-19.5	-20.5				3.64	1	-1	0	-0.5	2	1	1	0.5	1.5
		3.68	-22.5	-23.5	-21.5	-22.5	-20.5	-21.5	-20	-19.5	-19.5				3.68	1	-1.5	0	-1	2	1	1	1.5	2
		3.72	-24.5	-22	-22	-23	-22.5	-21	-21.5	-19.5	-20				3.72	0	0	-0.5	-2	0.5	2	0	1.5	1
		3.76	-25	-22.5	-22.5	-24.5	-22.5	-20	-21.5	-19.5	-22				3.76	-0.5	0	-0.5	-2.5	0.5	4	0.5	1.5	0.5
		3.8	-25.5	-22	-24	-24	-23	-19.5	-20.5	-19.5	-22				3.8	-1	0.5	-1	-1.5	-1.5	3	0.5	2	0
		3.84	-24.5	-21.5	-24	-24	-22.5	-20	-19	-19.5	-21.5				3.84	0	0.5	-0.5	-2	-1	1.5	0	1.5	1
		3.88	-24.5	-21.5	-23.5	-23.5	-21.5	-20.5	-19.5	-19	-22				3.88	0.5	0.5	0	-0.5	-1	1	-0.5	1.5	1
		3.92	-25.5	-23	-22	-23	-20.5	-20	-20	-20	-22.5				3.92	1	1.5	1	1.5	-1	2	-0.5	0.5	0.5
		3.96	-26	-24	-22.5	-23.5	-20	-19.5	-19	-21	-22				3.96	0.5	1	0	1.5	0	3	0.5	0	0.5
		4	-25.5	-24	-23	-24	-19.5	-20.5	-19.5	-22.5	-21				4	0.5	-0.5	-1	-0.5	2	3.5	1.5	-2	1
		4.04	-25	-22.5	-22	-22.5	-20.5	-21	-19	-22	-20.5				4.04	0.5	-0.5	-1.5	-0.5	0.5	2.5	1.5	-1	1.5
		4.08	-24.5	-23	-22	-21.5	-22	-21	-19	-21	-21.5				4.08	0.5	-0.5	-2	-0.5	0.5	3	1	1	1
		4.12	-24.5	-23	-22.5	-19.5	-21.5	-21	-18.5	-20.5	-21.5				4.12	1	0	-1.5	0.5	0.5	3	1.5	2	0
		4.16	-25.5	-23.5	-24	-19.5	-22.5	-20.5	-18.5	-20	-22				4.16	1	0.5	-1.5	1	0	3	1.5	1	-0.5
		4.2	-25.5	-23.5	-24	-20.5	-22	-21	-19.5	-19	-21.5				4.2	0.5	0	-1.5	0.5	-1	2	1	1	0
		4.24	-26	-24	-23	-22	-21	-21.5	-19.5	-18.5	-21				4.24	-0.5	-1	-0.5	-0.5	0	1.5	0.5	1	2.5
		4.28	-26	-24	-21	-22	-22	-22	-20.5	-18.5	-21				4.28	0	-1	-0.5	-1.5	-1.5	0	0	1.5	3
		4.32	-24	-22.5	-22	-23	-22	-22	-20	-18.5	-20.5				4.32	0.5	0.5	-0.5	-1	-1.5	0	0	1.5	2.5
		4.36	-23.5	-23	-23	-23.5	-21.5	-21.5	-20	-18	-19.5				4.36	0.5	1	0	-0.5	-0.5	0.5	-1	2	2
		4.4	-23	-23	-22	-23.5	-23	-21	-20	-18.5	-20.5				4.4	2	1.5	0	-1	-0.5	1	0	2	1.5
		4.44	-23.5	-23.5	-21.5	-22.5	-22.5	-20	-21	-19	-20.5				4.44	1.5	0	0.5	-0.5	0	1	-0.5	1	1.5
		4.48	-24.5	-23.5	-22	-21.5	-22.5	-20.5	-22	-21	-19.5				4.48	-0.5	-0.5	1	0	-0.5	1	-0.5	0.5	2
		4.52	-24	-23.5	-23	-22	-22.5	-21.5	-21	-20.5	-20				4.52	0	0.5	0	0	-1.5	1	0	1	1.5
		4.56	-23.5	-24.5	-23.5	-23	-22	-21	-20.5	-19	-20.5				4.56	1	0.5	-1.5	-0.5	0	2	0	2.5	1
		4.6	-23	-25	-24.5	-23.5	-20.5	-20.5	-20	-19.5	-21.5				4.6	1	-1	-2.5	-1.5	0	3.5	1.5	2	1.5
		4.64	-24	-24.5	-23	-22.5	-21	-20.5	-19	-19.5	-21.5				4.64	0	-1	-1	-2	1	3	1.5	1	1.5
		4.68	-24.5	-24.5	-20.5	-22	-23	-20.5	-18.5	-19.5	-21.5				4.68	-0.5	-0.5	0	-1.5	0.5	1.5	1	1	1
		4.72	-25	-23	-21.5	-22	-22	-20.5	-17.5	-19.5	-21.5				4.72	0	0.5	-0.5	-1	1	1.5	2	1.5	0.5
		4.76	-25	-22.5	-22	-23	-21	-21.5	-18.5	-20.5	-21				4.76	0	0.5	-0.5	-2	0.5	1	2.5	1	1
		4.8	-25	-21.5	-22.5	-23	-20	-21.5	-17.5	-20	-21.5				4.8	0.5	0.5	-1	-1.5	0.5	0.5	3	1.5	0
		4.84	-25	-22.5	-22	-22	-19.5	-21.5	-18	-19.5	-21				4.84	0.5	0	-1	-1.5	-0.5	0	1.5	1.5	0.5
		4.88	-25	-24.5	-23	-21.5	-20.5	-20.5	-18.5	-19.5	-22				4.88	0.5	-1	-0.5	-1	-1	2	0	1.5	1
		4.92	-24	-25.5	-23.5	-22	-22	-21.5	-18.5	-19.5	-21.5				4.92	1	-0.5	0	-1.5	-1.5	1.5	0.5	1.5	1.5
		4.96	-23.5	-24.5	-24	-21.5	-22.5	-22.5	-19.5	-20	-22.5				4.96	2	0	-1.5	-1.5	-1	1.5	0.5	1.5	1
		5	-24	-24	-24	-23	-22.5	-23	-20.5	-19.5	-22.5				5	1	-0.5	-2	-2	-0.5	1.5	0	1.5	0.5
		5.04	-24.5	-23.5	-24.5	-23.5	-23.5	-22.5	-22	-20	-22				5.04	1.5	-1	-1.5	-2	-1	0.5	-0.5	1	1
		5.08	-24.5	-23	-24	-23.5	-22.5	-22	-21	-22.5	-21				5.08	1	0	-1	-2	-0.5	0.5	0	-0.5	1
		5.12	-24.5	-22.5	-24	-24.5	-22.5	-21.5	-19.5	-21.5	-22.5				5.12	1	1.5	-0.5	-2.5	0	1	0.5	0.5	0.5
		5.16	-25.5	-22.5	-23.5	-24.5	-22.5	-21.5	-18	-20.5	-22.5				5.16	-0.5	1	-1	-3	0	0.5	1	1	1
		5.2	-25.5	-21.5	-22.5	-25	-23	-21.5	-17.5	-19.5	-22				5.2	0.5	1	0.5	-3.5	-0.5	0.5	1.5	0	1.5
		5.24	-25	-20.5	-22.5	-23.5	-23.5	-22.5	-19.5	-18.5	-20.5				5.24	0.5	1	1.5	-1.5	0	0	0	0	2
		5.28	-25.5	-22	-22.5	-22.5	-23.5	-22	-21.5	-18.5	-21				5.28	1	0	1.5	0	0.5	1.5	-1	1.5	2
		5.32	-25	-24	-23	-22	-22.5	-20.5	-22	-19	-22				5.32	2	0	-0.5	0.5	2	1.5	-0.5	2.5	1.5
		5.36	-24	-24	-23	-22.5	-21.5	-20.5	-20	-19.5	-22.5				5.36	2	0.5	-1.5	-0.5	1.5	1	0	2	1
		5.4	-24	-24	-23.5	-23	-21.5	-21	-17.5	-20	-22.5				5.4	1	1.5	-2	-0.5	0	1	1.5	1.5	2
		5.44	-24.5	-24	-23	-24	-22.5	-20.5	-17	-20.5	-21				5.44	-0.5	0.5	-1.5	0	-1	2	2	0.5	3
		5.48	-24	-24	-22.5	-23.5	-23.5	-22	-17.5	-21.5	-21				5.48	-0.5	0	-2	0	-1	2	2.5	-0.5	2.5
		5.52	-24	-24.5	-23.5	-23.5	-24	-23	-18	-21	-20.5				5.52	0.5	-1.5	-1.5	-2	-0.5	1.5	2	-0.5	2
		5.56	-22.5	-24	-24	-22.5	-24	-21.5	-18	-21	-20.5				5.56	1.5	-1	-1	-1.5	0	1.5	1.5	0.5	2
		5.6	-23	-22	-24	-21.5	-22.5	-20	-18.5	-20.5	-20				5.6	1	0	0.5	-0.5	0.5	2.5	0	0.5	2.5
		5.64	-23.5	-21.5	-23.5	-23	-22	-19.5	-20.5	-20	-19				5.64	1.5	0.5	1	0	0.5	2.5	-1.5	1.5	2.5
		5.68	-24	-22.5	-23.5	-24	-21.5	-20.5	-21	-18.5	-19				5.68	2.5	0.5	1	0	0.5	1.5	-0.5	3	2.5
		5.72	-25.5	-23.5	-23.5	-25	-21	-21	-21.5	-17.5	-19.5				5.72	2	1	0.5	-1	0.5	1	1	2	1.5
		5.76	-25.5	-24	-22.5	-25.5	-21.5	-21.5	-20	-17.5	-20.5				5.76	1	0	1	-0.5	0.5	0.5	1.5	2	1.5
		5.8	-25	-24.5	-21	-24	-21.5	-22.5	-19.5	-18	-21.5				5.8	1.5	-0.5	0.5	0	0.5	-0.5	1.5	2	2
		5.84	-25.5	-23.5	-20.5	-23	-24	-22	-19.5	-19.5	-22				5.84	0	0.5	0.5	0	-1	0	1.5	2	3.5
		5.88	-25	-23	-22.5	-23	-24.5	-20.5	-19	-19.5	-22				5.88	0.5	0.5	-0.5	-0.5	-1	1.5	2	1	2
		5.92	-24	-23	-24.5	-23	-23.5	-20.5	-18.5	-18	-22				5.92	0	0.5	-2.5	-1	0.5	2.5	2	2.5	1
		5.96	-23.5	-23.5	-25	-23	-24	-20.5	-19	-18.5	-21				5.96	0	-1	-3	-1.5	0.5	1.5	2	2.5	2
		6	-24	-23	-25.5	-23.5	-23	-18.5	-19	-19	-20.5				6	1	-1.5	-2.5	-2	0.5	2	1.5	2	3
		6.04	-24	-23	-24.5	-23.5	-23	-20.5	-20	-20	-19.5				6.04	2.5	-2	-2	-1	-0.5	0.5	0	1	3
		6.08	-24	-23	-23	-23	-23	-21.5	-20	-20.5	-20				6.08	2	-0.5	0	-1	-1	1.5	-1	0	3
		6.12	-24.5	-23	-22	-22.5	-22.5	-21.5	-19	-19.5	-20				6.12	-0.5	0.5	0	-1	-0.5	1.5	-0.5	1.5	4
		6.16	-24	-23.5	-21.5	-22	-21.5	-22	-17	-19	-20				6.16	-0.5	1	0	-0.5	0.5	1.5	1	1.5	3
		6.2	-24	-24	-19.5	-22.5	-21.5	-22	-18	-17.5	-20.5				6.2	1	0.5	1	0	1	2.5	1	1.5	1.5
		6.24	-25	-23.5	-20.5	-22.5	-22.5	-22.5	-18.5	-17.5	-21				6.24	0.5	0.5	0.5	0	1	2.5	1.5	1	1
		6.28	-24.5	-23.5	-23	-22	-22.5	-22.5	-18.5	-19.5	-20.5				6.28	1	0.5	-1	0	0.5	1.5	1.5	1	1.5
		6.32	-24.5	-24	-24	-23.5	-21	-22	-19	-21	-20				6.32	2	1	-1.5	-0.5	1.5	1.5	1.5	1	2.5
		6.36	-25	-24	-24	-24.5	-20	-21.5	-19	-20	-19.5				6.36	1.5	1	-1.5	-2.5	0.5	0.5	0	2	3
		6.4	-26	-24.5	-22	-23.5	-19	-20	-19	-19.5	-19.5				6.4	0.5	0.5	0	-2	0.5	1	-0.5	4	4
		6.44	-25.5	-25	-21	-23.5	-20	-20	-18	-18.5	-19				6.44	-0.5	-0.5	0	-1.5	1	0.5	0	4	4.5
		6.48	-24.5	-25.5	-21.5	-23	-22	-21	-19.5	-17	-20				6.48	0	-1	-1	-1	0.5	0	-1	3	5
		6.52	-24	-25	-22	-22.5	-23	-21.5	-19	-18	-21				6.52	0	-1	-1	-1	-1	0	-1	2.5	4
		6.56	-24	-23.5	-22	-22	-22.5	-21.5	-17.5	-19	-22				6.56	1	0	0	-0.5	-0.5	1	0.5	3	3
		6.6	-24	-24	-22.5	-22	-22	-20.5	-17	-20	-22.5				6.6	0.5	1	-1	-0.5	-1	2	1	2.5	1.5
		6.64	-26	-24.5	-22.5	-21.5	-22.5	-20.5	-18.5	-19.5	-22.5				6.64	-0.5	0	-1.5	0	-1.5	2	1.5	1.5	0.5
		6.68	-25	-24	-23	-22	-22	-22	-19.5	-20	-21				6.68	0	-1	-3	0.5	-1	1	2	0	1
		6.72	-22.5	-23.5	-23.5	-23.5	-21.5	-21.5	-19.5	-19.5	-21				6.72	0	-0.5	-2	1	0	2	1.5	0	1.5
		6.76	-23	-24.5	-24	-24	-21.5	-21.5	-19	-20	-21				6.76	-0.5	0	-1	0.5	0.5	3	1	1	1.5
		6.8	-24.5	-24	-23.5	-23.5	-22.5	-21	-19.5	-20	-20				6.8	0	-0.5	-0.5	-1	-0.5	3	1	1	2.5
		6.84	-23.5	-23.5	-23.5	-23	-22	-21	-19	-19	-21.5				6.84	0	0	-0.5	-1.5	-1	3	0.5	0.5	2.5
		6.88	-24.5	-24	-24.5	-23	-22.5	-21.5	-20	-18	-22.5				6.88	0	0.5	0	-1.5	-0.5	3	1	1.5	1.5
		6.92	-25	-24	-24.5	-25	-22.5	-20.5	-20.5	-18.5	-21.5				6.92	0	1	-0.5	-2	-0.5	3	1	1	2
		6.96	-24.5	-24	-24	-25	-23	-20	-20	-19	-21.5				6.96	0	-0.5	-1.5	-2.5	0.5	3.5	-0.5	1	1.5
		7	-23.5	-23.5	-23.5	-24	-23.5	-22	-20	-19	-21.5				7	0	-0.5	-1.5	-2	0	2.5	-0.5	1.5	1.5
		7.04	-24	-23	-23	-23	-23.5	-22.5	-20	-19	-20.5				7.04	-0.5	0	-0.5	-2	-0.5	2	-0.5	0.5	2.5
		7.08	-23.5	-23	-21.5	-23	-22	-21.5	-20.5	-19.5	-21				7.08	-0.5	1.5	1	-2.5	-0.5	1.5	-1.5	0.5	2
		7.12	-23.5	-22.5	-21.5	-22.5	-21.5	-21.5	-21	-19.5	-20.5				7.12	0.5	1.5	1	-1.5	0	2.5	-0.5	1.5	2
		7.16	-23.5	-23	-22	-22.5	-22	-20.5	-21	-18.5	-21.5				7.16	0.5	1	-1.5	-2	-0.5	3.5	0	2.5	1.5
		7.2	-24.5	-23	-22.5	-22.5	-23	-21	-20	-18	-21.5				7.2	0.5	1	-2	-2.5	-1.5	2.5	0.5	2.5	1.5
		7.24	-24	-23	-23.5	-23	-23	-22	-19	-18	-21				7.24	-0.5	1	-1.5	-3	-1	1	1	3	2
		7.28	-24.5	-24	-23.5	-21.5	-23.5	-20	-18.5	-17.5	-20.5				7.28	-0.5	-0.5	-1.5	-1	-0.5	1.5	2	3	3
		7.32	-24.5	-24.5	-22.5	-21.5	-23	-19.5	-18	-18	-21				7.32	0	-1	-0.5	0.5	-1	1.5	3	2.5	2.5
		7.36	-25.5	-24	-23	-22.5	-23.5	-21	-18	-19.5	-22				7.36	0.5	0	0	0	-1	1.5	3	1.5	1.5
		7.4	-25.5	-23.5	-22.5	-23	-21.5	-21.5	-19.5	-20.5	-23				7.4	1	0.5	0	-1	1	1.5	1.5	1	1.5
		7.44	-24	-24	-24	-22	-20.5	-21	-20	-21	-22.5				7.44	1.5	-1	-1	-1.5	2	2	0.5	1	2
		7.48	-25	-23	-24.5	-22	-21	-20.5	-20.5	-20.5	-23				7.48	0	-1.5	-0.5	-1	1.5	1.5	1	1.5	1.5
		7.52	-25.5	-23.5	-24.5	-23	-23.5	-21	-20.5	-20	-23				7.52	-0.5	-1	-0.5	-1	-0.5	2	1.5	1.5	1.5
		7.56	-25	-23.5	-24.5	-24.5	-22.5	-21	-18.5	-20	-21.5				7.56	-1	0.5	-1.5	-0.5	-0.5	2.5	2	1	2
		7.6	-24.5	-24	-24	-25.5	-22	-20.5	-18	-19.5	-22				7.6	-1.5	0.5	-1.5	-1	-0.5	2.5	2	1.5	2
		7.64	-24	-22	-25	-25.5	-22	-21	-20	-19	-20.5				7.64	-1	1.5	-1.5	-1	-0.5	1	0.5	0.5	3
		7.68	-25	-22	-25.5	-24	-22	-21.5	-21.5	-18.5	-20.5				7.68	-1	0.5	-1	-1	0	1	-1	0	2.5
		7.72	-26.5	-22.5	-24.5	-23.5	-21	-21.5	-21	-19.5	-20.5				7.72	-1	-0.5	-1	-0.5	0	2	0	-0.5	2.5
		7.76	-26	-23.5	-23.5	-23	-21	-21	-20.5	-20.5	-21.5				7.76	-0.5	-0.5	-2	-1	1	3	0.5	0	3.5
		7.8	-25.5	-25	-22	-23	-21.5	-21.5	-20.5	-21	-21.5				7.8	0.5	0.5	-2	-1	0.5	2.5	0.5	2	4
		7.84	-26	-24.5	-21.5	-23	-23	-22.5	-19	-21	-21.5				7.84	0	0.5	-1	-1.5	-1.5	1	1	1.5	3
		7.88	-26.5	-22.5	-22.5	-23	-24	-22.5	-18	-21	-21.5				7.88	-1	1.5	-1	-1	-1.5	1.5	1.5	1.5	3.5
		7.92	-25	-22	-24.5	-22.5	-22	-21.5	-18	-19.5	-22.5				7.92	-0.5	1.5	-1.5	0	-0.5	2.5	3	1.5	2
		7.96	-24	-23.5	-25.5	-22.5	-20.5	-21.5	-20	-18.5	-22.5				7.96	0.5	1	-1	-1	-0.5	1.5	1.5	1.5	2.5
		8	-23	-23.5	-24.5	-23	-21.5	-21	-20	-18.5	-22.5				8	0.5	1	-1	-1.5	-0.5	1.5	0.5	1.5	2
		8.04	-24	-23.5	-24	-23	-22.5	-21	-19.5	-18.5	-21.5				8.04	0	0.5	-1.5	-1.5	-1	1	0	1	2.5
		8.08	-25	-24	-24.5	-23.5	-22.5	-22	-18.5	-19	-22				8.08	0.5	1	-2	-2	-1	0.5	1	0.5	3.5
		8.12	-26	-25	-23.5	-24	-22.5	-23	-19	-19.5	-22.5				8.12	-0.5	1.5	-1	-1.5	-1.5	1.5	0.5	1	3
		8.16	-26.5	-25	-23	-24	-22.5	-21.5	-19.5	-18.5	-23				8.16	-0.5	0.5	-0.5	-1	-0.5	2.5	0	2	2
		8.2	-26	-24.5	-23.5	-23.5	-23	-21.5	-19.5	-18.5	-22				8.2	-0.5	-0.5	0.5	-0.5	-0.5	3.5	1.5	2.5	2
		8.24	-25.5	-24.5	-24.5	-24	-21.5	-21	-20.5	-18.5	-21				8.24	-0.5	-1	-0.5	-1.5	0	3.5	1.5	2	3.5
		8.28	-25	-23.5	-25	-24	-21	-21	-20	-19.5	-21.5				8.28	-1.5	0.5	-2	-1.5	0.5	4.5	0	2	3
		8.32	-26	-22	-23.5	-22.5	-21	-21	-19	-19.5	-22				8.32	-1.5	1.5	-1.5	-0.5	-0.5	3	0	2	2
		8.36	-26	-22.5	-22.5	-22	-21	-22	-20	-19.5	-22				8.36	0	3	-1	-1.5	-1.5	2	-0.5	2	1.5
		8.4	-25	-24	-22.5	-23	-21.5	-21.5	-20.5	-19	-21				8.4	0	1.5	-1.5	-1.5	-1	2	-1	1	2.5
		8.44	-22.5	-23.5	-23.5	-24	-22	-21.5	-19.5	-18	-21				8.44	1	0.5	-2	-0.5	-0.5	2	1	0.5	3
		8.48	-23	-22	-24	-24.5	-22	-20.5	-19	-17.5	-20				8.48	1.5	0	-1.5	0	0	2	2.5	1	2.5
		8.52	-24	-21.5	-23.5	-24	-23	-21.5	-20	-19.5	-20				8.52	1.5	0	-1	1	0	2.5	2	0.5	2.5
		8.56	-24.5	-21.5	-23	-23.5	-24	-22	-20	-20.5	-20.5				8.56	0.5	0.5	0	1.5	-0.5	2	1	0	2.5
		8.6	-25	-22.5	-22	-23.5	-24	-21.5	-19.5	-19.5	-21				8.6	-1	1.5	-0.5	1.5	-1.5	1.5	0.5	1.5	1.5
		8.64	-25	-23	-23.5	-23.5	-23	-22	-20	-18.5	-22				8.64	-1	2	-1.5	1	-1	1	-0.5	2.5	1
		8.68	-24	-23.5	-24	-23	-21.5	-21.5	-20.5	-19	-22.5				8.68	-1	1	-2	0.5	0.5	2	-1	1.5	0
		8.72	-25	-23.5	-24	-24	-20.5	-21.5	-21	-19	-23.5				8.72	-1	1	-2	-1.5	0.5	3	-0.5	0.5	0
		8.76	-26	-23	-24	-23.5	-21.5	-23	-20	-20	-23				8.76	-1	0.5	-1.5	-1.5	-0.5	1.5	0.5	1	0.5
		8.8	-26	-23	-24.5	-23.5	-21.5	-22.5	-19.5	-20.5	-22				8.8	-0.5	-0.5	-1	0.5	-0.5	1	1.5	1	0
		8.84	-25.5	-23.5	-25	-23.5	-20.5	-21.5	-19.5	-20.5	-22				8.84	0	0.5	-1.5	0	1	1	0.5	0	0.5
		8.88	-25.5	-23	-23	-23	-20.5	-21	-20.5	-19.5	-22				8.88	0	1.5	-1	-1	0	2	-0.5	1	1.5
		8.92	-26	-23	-23.5	-22.5	-21	-20.5	-21	-18.5	-23				8.92	-0.5	1.5	-1	-1	-1	2.5	-1	3	0.5
		8.96	-26.5	-23.5	-24	-21	-20	-22	-19.5	-18.5	-23				8.96	-0.5	0	-0.5	1	-1	0.5	-1.5	3	-0.5
		9	-27	-23.5	-24.5	-22	-19.5	-21.5	-18	-19	-24				9	-1	-0.5	-1.5	0	-1	0.5	-0.5	1.5	-1
		9.04	-26.5	-23.5	-24	-22	-20.5	-21	-18	-19.5	-23.5				9.04	1	-0.5	-1.5	1	-0.5	0.5	1	1	1
		9.08	-25	-24	-23.5	-21.5	-21.5	-21	-19.5	-19	-23				9.08	2	-0.5	0	2.5	0	0	0.5	1	2
		9.12	-25.5	-24.5	-23	-23	-22.5	-22	-19.5	-19	-22.5				9.12	0	0.5	-0.5	1.5	0.5	0.5	0.5	2	1
		9.16	-24.5	-24.5	-23.5	-23	-23	-21.5	-20	-18.5	-21.5				9.16	-2	0.5	-1.5	0.5	0.5	1	0.5	3.5	2
		9.2	-25.5	-23	-23	-21.5	-22	-21.5	-18.5	-18	-22				9.2	-2	2	-2	-0.5	0	0	1.5	3	3
		9.24	-24	-22.5	-23.5	-22	-21.5	-20	-17.5	-18.5	-21.5				9.24	0	1	-2.5	-1.5	0	1	2	3	3
		9.28	-22.5	-22.5	-24	-23.5	-21.5	-19.5	-18.5	-20	-21.5				9.28	1	0.5	-2	-1	-0.5	2	1.5	1.5	3
		9.32	-22.5	-24	-25.5	-24	-22	-22	-20	-20	-22				9.32	0.5	0.5	-1	-1.5	0.5	1.5	0	1.5	2
		9.36	-24	-24	-24.5	-24.5	-22.5	-22.5	-21	-19.5	-23				9.36	-1	1.5	-0.5	-2	0	1	-0.5	1.5	0.5
		9.4	-24.5	-22.5	-23.5	-23.5	-23	-21.5	-21.5	-19	-23				9.4	-1.5	2	-1	-1	0.5	1.5	-1	1.5	1
		9.44	-24.5	-20.5	-24	-22.5	-24	-22.5	-20.5	-19	-25				9.44	-1	2.5	-1	0	-0.5	1	-0.5	0.5	1
		9.48	-24.5	-21	-23.5	-23.5	-24	-22	-20	-19.5	-24.5				9.48	0	2	-1	-0.5	-1	0.5	0.5	0	1
		9.52	-24	-22.5	-22.5	-22.5	-22.5	-22.5	-19.5	-19	-24				9.52	0.5	1.5	-1	-0.5	-1	0.5	1	0.5	0.5
		9.56	-23.5	-22.5	-23	-21.5	-22	-23	-20.5	-18	-24				9.56	1.5	1	-0.5	0.5	-0.5	0	0	1	0.5
		9.6	-24.5	-23	-23	-21.5	-22	-22.5	-20.5	-17	-24				9.6	0	0	-0.5	0.5	0	0	0	2.5	1.5
		9.64	-25	-22	-22.5	-22.5	-21.5	-21.5	-22	-17.5	-23				9.64	-0.5	0.5	-0.5	-0.5	0.5	0	-1.5	2.5	2
		9.68	-24	-23	-22	-23	-22	-22.5	-22.5	-18.5	-22.5				9.68	0.5	0	0	-0.5	0.5	-1.5	-1	1.5	2
		9.72	-24	-23.5	-23	-24	-22.5	-22.5	-21	-18.5	-22.5				9.72	1.5	1.5	-0.5	-2	-1.5	-0.5	-0.5	1	2
		9.76	-24.5	-23.5	-23.5	-23.5	-23	-22.5	-20.5	-19.5	-22				9.76	2	0.5	-1.5	-0.5	-1.5	0	0.5	0.5	3
		9.8	-25	-22.5	-22.5	-23.5	-22.5	-21	-19.5	-19.5	-20.5				9.8	0.5	0.5	0	0	-0.5	2	0.5	1	4
		9.84	-25.5	-22.5	-22	-22	-21.5	-21	-19	-19.5	-21.5				9.84	0.5	1.5	0	0.5	-0.5	2	0.5	1	3.5
		9.88	-25	-23	-22	-22.5	-23	-22	-19.5	-19.5	-23				9.88	0.5	2.5	-0.5	-1	-1	0	1.5	0	2.5
		9.92	-24.5	-24.5	-23	-22.5	-22.5	-21.5	-20	-20.5	-23				9.92	0.5	1.5	-1.5	-2	-0.5	0	1	-0.5	1
		9.96	-24.5	-24.5	-23	-21.5	-22.5	-19.5	-21	-19.5	-22.5				9.96	0.5	1	-2.5	-1	-0.5	1.5	0	0	1.5
		10	-24	-23	-23	-21.5	-24	-20	-21.5	-19	-24				10	0.5	1	-1.5	-0.5	-1	1.5	-0.5	0.5	0.5
		10.04	-24.5	-23	-22.5	-22.5	-23.5	-20	-21	-19	-22.5				10.04	-1	0	0	0	-1.5	2	0	1.5	2
		10.08	-24	-24	-22	-23	-21.5	-20	-20.5	-19.5	-21.5				10.08	-0.5	-0.5	0	-0.5	-0.5	2	1	1.5	2
		10.12	-24.5	-24	-21	-23.5	-21	-21	-21.5	-19.5	-21				10.12	-0.5	0	0	-0.5	0.5	1	0.5	1	2.5
		10.16	-24.5	-22.5	-21.5	-24	-21.5	-22.5	-19.5	-19	-22				10.16	1.5	1	0	-1	0.5	1	1	0.5	2.5
		10.2	-25	-21.5	-22	-23	-21.5	-22.5	-18.5	-19	-23				10.2	1.5	2	-1	-1.5	1	1	1.5	1	2
		10.24	-24.5	-22.5	-23	-21	-21.5	-23	-18.5	-19	-22.5				10.24	1.5	2	-2	0	2	0.5	1	2	2.5
		10.28	-25	-23	-24.5	-19.5	-23.5	-21.5	-19.5	-20	-23.5				10.28	0.5	1	-1.5	0.5	0.5	0	1	2	1
		10.32	-26.5	-23	-24.5	-20.5	-23.5	-21	-20	-20	-23				10.32	-2	0	-1.5	1.5	-0.5	-0.5	0	1.5	1.5
		10.36	-26	-22.5	-23.5	-22	-22.5	-21.5	-19.5	-19.5	-21.5				10.36	-1.5	0.5	-1	2.5	-0.5	0	1	1.5	2.5
		10.4	-26	-22.5	-22	-23	-22.5	-22	-18.5	-20	-20				10.4	0	1	-1	2	0	1	1	0.5	3
		10.44	-25.5	-23	-22	-22	-22	-21.5	-18.5	-21	-21				10.44	0.5	0	-0.5	2	-0.5	0.5	1	-1	1
		10.48	-24.5	-23.5	-21.5	-21	-23	-21.5	-19.5	-19.5	-21.5				10.48	0.5	-1	0.5	0	-1.5	-0.5	0.5	-0.5	1.5
		10.52	-24	-24	-21.5	-22	-22.5	-21	-20.5	-19	-22.5				10.52	-0.5	-0.5	0.5	-1.5	-1	0.5	0.5	0	2.5
		10.56	-24	-23.5	-22.5	-22.5	-22.5	-21	-21	-18.5	-22.5				10.56	-1	0	0.5	-1.5	0	1.5	0	1.5	3
		10.6	-23.5	-23.5	-22.5	-22	-22	-20.5	-21	-19	-22.5				10.6	-1	-1	0.5	-1	1.5	2	-0.5	1	2.5
		10.64	-23	-24	-23	-22	-22.5	-21	-20	-18.5	-22				10.64	0	-1	-0.5	0	2	2	0	1	2.5
		10.68	-24	-24.5	-22.5	-22.5	-23.5	-21	-19	-19	-20.5				10.68	0	-0.5	-1	-0.5	0.5	2	1.5	2	4
		10.72	-24.5	-22	-23	-22.5	-23	-22	-19.5	-20	-21				10.72	0	0.5	-0.5	0	0	1	1.5	1	3.5
		10.76	-24.5	-20.5	-23.5	-22	-23	-23.5	-19.5	-19.5	-21.5				10.76	0.5	1	0	0.5	-0.5	0.5	0.5	0	2.5
		10.8	-25	-22.5	-23.5	-22.5	-22.5	-23	-19.5	-18.5	-21.5				10.8	0.5	1	-0.5	0.5	-0.5	0	-0.5	0	1.5
		10.84	-24.5	-25	-22.5	-22.5	-21.5	-22	-18.5	-18.5	-21.5				10.84	2	0	-1	0	-0.5	1.5	0.5	1.5	1
		10.88	-24.5	-25	-22.5	-22.5	-22	-21.5	-19.5	-17.5	-21.5				10.88	2	0.5	-2.5	-1	-1	2	1	2	1
		10.92	-23	-24	-23	-22.5	-21	-20.5	-19.5	-18	-23				10.92	2	0.5	-1.5	-0.5	0	2.5	1.5	1.5	0.5
		10.96	-23.5	-22.5	-23.5	-23	-21	-21	-20.5	-19.5	-21.5				10.96	1.5	0.5	-1	-0.5	-1	2	1	0	2.5
		11	-23.5	-23	-23.5	-22.5	-21	-22	-20.5	-20	-21.5				11	1	0	0	0	-0.5	1.5	0.5	1.5	2
		11.04	-24.5	-23.5	-25	-21	-21	-21.5	-21	-20.5	-22.5				11.04	0	-0.5	-1	1	1	1.5	1	2	1.5
		11.08	-25.5	-22	-24.5	-20.5	-20.5	-21.5	-20.5	-20	-23.5				11.08	-2	1	-2	1	2	1.5	2	2	1
		11.12	-25	-22	-23	-20.5	-21	-21	-19.5	-19	-22.5				11.12	-2	1	-2	1.5	1	1	1.5	1.5	2.5
		11.16	-24	-22	-23	-21.5	-22	-20.5	-20	-18.5	-21.5				11.16	-1.5	2	-2.5	1	-0.5	0.5	0.5	0.5	3
		11.2	-24.5	-22	-23.5	-22.5	-21.5	-20.5	-21	-18.5	-21.5				11.2	-0.5	2	-4	0	-0.5	-0.5	0	1	2.5
		11.24	-24	-22.5	-25	-23.5	-21	-21	-20.5	-19.5	-21				11.24	0	1.5	-3	-1.5	-0.5	0	0	1.5	3
		11.28	-25	-22.5	-24	-23.5	-21.5	-22.5	-20	-19.5	-21.5				11.28	-0.5	1.5	-0.5	-1.5	-1	0	0.5	2	3
		11.32	-25	-22.5	-22	-22.5	-23	-23	-21	-18	-22.5				11.32	1.5	1	1	-1	-1	0.5	0	3	2.5
		11.36	-24.5	-23	-22	-23	-25	-24	-22	-18.5	-22				11.36	2.5	-0.5	0.5	-0.5	-2	0.5	-1.5	2	3
		11.4	-23	-21.5	-23	-24	-24	-24	-20.5	-19.5	-21				11.4	2.5	0.5	0.5	-1	-1	0.5	0	1	4
		11.44	-22	-22	-23.5	-23.5	-21	-23	-20	-20	-21				11.44	2	0.5	0	-1	0	0.5	0	0	3.5
		11.48	-22.5	-22	-24	-24	-21.5	-22	-20	-20.5	-20				11.48	2	1	-1	0	-0.5	0	0	0.5	3.5
		11.52	-23	-23	-23	-23.5	-22	-22	-20.5	-20.5	-20.5				11.52	2.5	-0.5	-0.5	0	-1.5	-0.5	0	0	3
		11.56	-23.5	-23.5	-23.5	-23	-23.5	-21.5	-20.5	-20	-22				11.56	1.5	-0.5	-1.5	0	-2.5	0	-0.5	0.5	2
		11.6	-23	-24.5	-24	-24.5	-24.5	-20.5	-21	-20.5	-22				11.6	1	-0.5	-2.5	-1	-2	1.5	0	0	2
		11.64	-21	-24.5	-24	-25	-23.5	-21	-21	-20	-22				11.64	0.5	0	-1.5	-1.5	0	2	0.5	0	3
		11.68	-20.5	-25	-23.5	-23.5	-21.5	-21	-20	-19	-22				11.68	0	1	-1.5	-0.5	1.5	2	0	2	3
		11.72	-20.5	-25	-23.5	-23.5	-21.5	-21.5	-20	-20	-22				11.72	1	1	-2	0	1.5	2	0	2	3.5
		11.76	-21.5	-24	-23.5	-24	-20.5	-21	-19.5	-20.5	-22				11.76	1.5	1.5	-2.5	0	0.5	2	1	1	2.5
		11.8	-23	-23.5	-22.5	-22.5	-21	-21	-19.5	-20.5	-22.5				11.8	0.5	2	-2	0	-0.5	3	1.5	1	2
		11.84	-24.5	-23.5	-21.5	-22	-20.5	-20.5	-20	-20	-22.5				11.84	-1	1.5	-1.5	-1	0.5	2	1	0.5	2
		11.88	-24	-23	-22	-22.5	-20.5	-20.5	-19.5	-20.5	-21.5				11.88	-0.5	0.5	-1	-1	0.5	2.5	0.5	-1	2.5
		11.92	-23.5	-23	-22.5	-23.5	-21.5	-20.5	-19	-19.5	-21.5				11.92	0	0.5	-0.5	-0.5	-0.5	2	0.5	0	2.5
		11.96	-23	-23.5	-23.5	-24	-22	-21.5	-20.5	-19	-22				11.96	-0.5	0.5	-1.5	-1	-2	2	-0.5	1	2
		12	-23.5	-23.5	-23	-23.5	-21	-21.5	-21	-18.5	-23.5				12	0.5	0.5	-1.5	-1	-0.5	0.5	-0.5	1.5	2
		12.04	-24.5	-23.5	-23	-23.5	-20	-21.5	-20	-19	-23				12.04	0.5	0.5	-1	-0.5	1	1	0.5	2	2.5
		12.08	-24.5	-22	-23.5	-23	-20.5	-22	-19.5	-18.5	-22.5				12.08	0.5	0.5	-1	-1	1	1	1.5	1.5	3
		12.12	-24	-21	-23.5	-23	-22.5	-21	-19	-19.5	-22.5				12.12	1	0	-0.5	-2	1	1.5	3	0.5	2
		12.16	-22	-22	-22.5	-22	-23	-21	-20	-19	-23				12.16	2.5	0.5	-0.5	-1.5	1	0.5	2	1	1
		12.2	-22	-23	-23	-22	-22	-21.5	-20	-19	-23				12.2	3	1	0	-1.5	1	0.5	1.5	1.5	0.5
		12.24	-23.5	-24	-23	-22.5	-21.5	-22	-19.5	-17.5	-22				12.24	2.5	1.5	-1	-1	1.5	0	1	2.5	0.5
		12.28	-24	-25	-22.5	-23.5	-22	-22	-18	-18	-22				12.28	2	1	-1.5	-1	0.5	0.5	1	2.5	0
		12.32	-25	-24.5	-22.5	-24	-22.5	-20.5	-18	-19.5	-22				12.32	0	1	-2.5	0	0	0.5	0	1.5	0
		12.36	-24.5	-25	-22.5	-22.5	-22.5	-21	-18.5	-19.5	-21.5				12.36	-0.5	-0.5	-1.5	0.5	0	-0.5	0.5	0.5	1
		12.4	-23.5	-24.5	-22.5	-21.5	-22.5	-21.5	-21	-19	-22				12.4	0	-1	0	1	-0.5	0.5	0	1	2
		12.44	-22.5	-24	-23	-21	-21.5	-21.5	-22	-20	-23.5				12.44	1.5	0	-0.5	1	0	1.5	-0.5	1.5	0.5
		12.48	-22.5	-24.5	-24	-20.5	-22	-21	-21.5	-20.5	-23				12.48	1.5	0	-2	1.5	0	1.5	-1	1	0.5
		12.52	-23	-24	-24.5	-20.5	-23	-21.5	-21.5	-19.5	-22.5				12.52	1	-0.5	-2.5	0.5	0	2	-2	0.5	1
		12.56	-24	-24	-24	-21.5	-23	-21.5	-20	-18.5	-23				12.56	0.5	0	-2.5	-0.5	0	0.5	-0.5	1	1.5
		12.6	-24	-23.5	-23	-21.5	-23	-22	-20	-19.5	-22				12.6	0.5	1.5	-1	-0.5	-1.5	-0.5	0	0.5	2
		12.64	-23.5	-24	-23	-21.5	-21	-21.5	-21	-19.5	-21.5				12.64	0	1.5	-1	0.5	-1.5	-0.5	0.5	0	1
		12.68	-23.5	-23.5	-23.5	-22.5	-20	-20.5	-19.5	-20	-21				12.68	-0.5	1	-1.5	0.5	0	1	1.5	0	1
		12.72	-24	-22	-24.5	-22.5	-21.5	-20.5	-19.5	-19	-21.5				12.72	0.5	1	-2.5	0	1	1	1	1	1.5
		12.76	-24	-22.5	-24	-21	-22	-22.5	-19.5	-17.5	-22.5				12.76	1	-0.5	-2.5	-1	0.5	0.5	1	1.5	3.5
		12.8	-23.5	-23	-23	-21.5	-22	-24	-20	-17.5	-22				12.8	0.5	-1	-2	-2	-0.5	0	1	2	3.5
		12.84	-23.5	-21.5	-24	-22	-22	-22.5	-20.5	-17.5	-22				12.84	0.5	-0.5	-2	-2	-1	0	1	2	3.5
		12.88	-24.5	-21	-25	-22	-22.5	-20.5	-20	-17.5	-21.5				12.88	0.5	0	-1.5	-0.5	-0.5	0.5	1.5	2	3
		12.92	-24	-21.5	-24.5	-22	-22	-20.5	-20	-17	-21.5				12.92	1.5	0	0	0.5	-0.5	1	1.5	2.5	3.5
		12.96	-23	-22.5	-23.5	-21.5	-20.5	-21	-19	-17.5	-22				12.96	1	0.5	0	0	0	1	1.5	2	2
		13	-22.5	-24	-24	-22	-20	-21.5	-20	-18.5	-22				13	0	0	-1.5	-1	0	1	1.5	2	0.5
		13.04	-23	-24	-24.5	-22	-22.5	-21	-20	-19.5	-23				13.04	0.5	-1	-3	0	-1.5	0.5	1.5	1	0.5
		13.08	-23	-23.5	-24.5	-22.5	-23	-21	-21	-19.5	-23				13.08	1.5	-0.5	-2.5	0.5	-0.5	0.5	1.5	1.5	0.5
		13.12	-23	-23.5	-23.5	-22.5	-23	-21.5	-20.5	-18.5	-23.5				13.12	2.5	1	-1	0	0.5	-1	1.5	3	0
		13.16	-23.5	-23.5	-23	-22	-21.5	-20	-20.5	-19.5	-23				13.16	1	0.5	0	0	1.5	1.5	1	2	1.5
		13.2	-23.5	-24.5	-23	-22	-20.5	-19	-19.5	-19	-22.5				13.2	0	0	0	-0.5	3	2	1.5	2	2
		13.24	-22.5	-23.5	-23	-21	-20	-20	-18.5	-18.5	-22.5				13.24	0.5	0	-0.5	1	3	2	2	2	1.5
		13.28	-23	-23	-23	-21	-21	-20.5	-18.5	-19.5	-23.5				13.28	1	-0.5	-0.5	1.5	2	2.5	1	1.5	1.5
		13.32	-23	-24	-24.5	-22	-23.5	-22	-20	-19	-24.5				13.32	1	-0.5	-1	0.5	-0.5	1.5	0.5	2	1
		13.36	-23	-24.5	-24.5	-22	-24.5	-22.5	-21	-19	-22.5				13.36	1	0.5	-2	0	-1.5	1.5	-0.5	2.5	2
		13.4	-23.5	-24	-23.5	-21	-24	-22	-22	-19.5	-20.5				13.4	0.5	0	-0.5	0	-1	1.5	-1	1.5	3
		13.44	-23	-24.5	-22.5	-21.5	-22	-21.5	-21.5	-19.5	-19.5				13.44	0.5	-0.5	0.5	-1.5	1	0.5	0	1	2
		13.48	-24	-24.5	-22	-22.5	-21.5	-21	-21	-19	-21				13.48	1	-1	0.5	-2.5	0	0.5	-0.5	1	0.5
		13.52	-25.5	-24.5	-22.5	-23	-21.5	-21	-21	-19	-21.5				13.52	0.5	-1	-0.5	-1.5	0	0.5	0	1	0.5
		13.56	-25	-24.5	-24.5	-23.5	-21	-22	-20	-19.5	-20				13.56	1	-0.5	-1	0	0	2	1.5	0	2.5
		13.6	-24.5	-24.5	-25	-23	-21.5	-20.5	-19.5	-20	-19.5				13.6	1	-0.5	-1	1	-0.5	3	2	-0.5	4
		13.64	-25	-24.5	-24.5	-23.5	-23.5	-20	-20	-20	-21.5				13.64	-0.5	-1	-0.5	0.5	0	2	1.5	-0.5	3
		13.68	-25	-23.5	-22.5	-23	-23	-20.5	-20.5	-19	-21.5				13.68	0	0	0	-0.5	0.5	1	0.5	1	2.5
		13.72	-24.5	-23.5	-23	-21.5	-21.5	-21.5	-21	-19.5	-20.5				13.72	2	1	-1.5	-0.5	0.5	1	0.5	1	2.5
		13.76	-24	-23.5	-25	-22	-23	-21	-20.5	-20	-20				13.76	2.5	0	-2.5	0.5	-1.5	1.5	1	1	2.5
		13.8	-24	-24	-25	-23	-24	-20	-20.5	-20.5	-19.5				13.8	1	-0.5	-3	-0.5	-2.5	2.5	0	1.5	2.5
		13.84	-24	-24.5	-24	-23	-24	-20.5	-20	-21	-20				13.84	0	-0.5	-2	-1	-1	1.5	0	2.5	1.5
		13.88	-22.5	-24.5	-25	-22.5	-22	-22	-19.5	-21	-21				13.88	0.5	-0.5	-2	-0.5	1	0.5	0.5	1.5	1.5
		13.92	-22	-24	-24.5	-22	-21	-21	-20	-20.5	-22.5				13.92	1	0.5	-2	0.5	1.5	-0.5	1.5	0	0.5
		13.96	-21.5	-23	-24	-23	-21	-20.5	-19	-20	-22				13.96	1	0	-2	1	1	0	2	0.5	1.5
		14	-21.5	-22.5	-22.5	-23.5	-22	-20.5	-18.5	-20	-21.5				14	1.5	0	-2	1	0.5	1.5	1.5	1.5	3
		14.04	-22.5	-22	-21.5	-25	-21.5	-21.5	-18	-20	-21				14.04	1.5	1	0	0	0.5	1.5	1.5	1.5	3
		14.08	-24	-22.5	-21	-23.5	-21	-23	-19	-19	-20.5				14.08	0	1	1	0.5	1.5	1	1.5	2	3
		14.12	-24.5	-23	-22	-22.5	-21	-22	-19.5	-19	-20				14.12	-1	2	0.5	-0.5	1.5	1.5	2	2.5	4
		14.16	-25.5	-24	-24	-21.5	-22	-21.5	-18.5	-19	-20				14.16	-2.5	1.5	-1.5	0	0	1.5	2	2.5	3
		14.2	-26	-23	-24.5	-22	-23	-23	-19	-19.5	-21.5				14.2	-2	0	-2.5	-0.5	-1.5	0	1.5	1.5	2.5
		14.24	-27	-23.5	-24	-22.5	-23	-23	-19.5	-18.5	-21.5				14.24	-2.5	-1.5	-2.5	0	-1.5	0.5	0.5	1.5	3
		14.28	-25.5	-23.5	-24	-22	-23	-21.5	-19.5	-18	-21				14.28	-2	-1	-1.5	1.5	-1.5	1	0.5	2.5	3.5
		14.32	-23	-22.5	-23.5	-21	-22.5	-21	-19.5	-18.5	-21				14.32	-1.5	1	-2	2.5	0	0.5	1.5	2.5	3
		14.36	-23	-23.5	-23	-21.5	-23	-21	-20	-19	-21				14.36	-0.5	1	-1.5	1.5	-0.5	0	2	2	2.5
		14.4	-23.5	-23.5	-22	-22	-22	-20	-19.5	-19	-21				14.4	0	2	-0.5	1.5	0	1	1.5	2.5	2.5
		14.44	-24	-23	-22	-23.5	-21.5	-20	-20	-19	-21				14.44	0.5	2	0.5	-1	-0.5	2	1.5	2.5	2.5
		14.48	-23.5	-22	-23	-23	-21.5	-20.5	-20	-19.5	-20.5				14.48	0.5	1.5	-1	-1	0	3	1	3	1.5
		14.52	-23.5	-23.5	-23.5	-23	-22.5	-21	-21	-20.5	-21				14.52	-0.5	0	-1.5	-0.5	-1	3.5	0.5	2.5	1
		14.56	-23.5	-23.5	-23.5	-23.5	-23.5	-20.5	-22	-20.5	-22				14.56	-0.5	0.5	-1.5	0.5	-1.5	3.5	-0.5	1.5	1
		14.6	-23.5	-23	-24	-23.5	-23.5	-20.5	-21	-19.5	-22.5				14.6	-0.5	0.5	-2	0	-0.5	4	-1	1	1
		14.64	-23.5	-24.5	-24	-23	-24	-21	-19	-20	-23				14.64	-1	0	-2	0	-1	3	0.5	1.5	2
		14.68	-23.5	-25	-24	-22.5	-23.5	-22.5	-18.5	-20.5	-22.5				14.68	-1.5	0	-2	-1	-1.5	1.5	1.5	1.5	2
		14.72	-22.5	-25	-24	-21.5	-23	-23	-17.5	-19.5	-22				14.72	-1	1	-2	0.5	-0.5	0.5	2	3	1
		14.76	-22	-24.5	-23.5	-21	-22	-23.5	-17	-19	-22.5				14.76	0.5	1	-1.5	1.5	0	-0.5	2	4	1
		14.8	-22.5	-24	-24	-21.5	-22.5	-22	-17	-20	-21.5				14.8	1	1	-1	0.5	-1	-1	2.5	3.5	1
		14.84	-22	-23.5	-23.5	-21.5	-22.5	-21.5	-18.5	-19.5	-22				14.84	1	1	0.5	0.5	-1	-0.5	2	4	1
		14.88	-23	-23	-22.5	-21.5	-22	-21	-20	-19.5	-22				14.88	0	2	0.5	0.5	0	0.5	1	3	1
		14.92	-24.5	-24	-23.5	-23	-22.5	-21.5	-21.5	-21	-20.5				14.92	-1	1	-1.5	-0.5	0	0.5	1	1	2
		14.96	-24	-24.5	-24	-23.5	-22	-21	-23	-20	-20				14.96	0	0	-3	-1	0	0.5	-0.5	1	2
		15	-23	-25	-24	-23.5	-22	-22.5	-22.5	-20	-21				15	0	-1	-2.5	-1	1	0	-0.5	1.5	1
		15.04	-22	-25	-24	-22	-22	-21.5	-21.5	-21	-22.5				15.04	-0.5	-1.5	-2.5	0	1	1.5	-0.5	1	0
		15.08	-23	-23.5	-24	-23	-21.5	-21.5	-21.5	-19.5	-22.5				15.08	-1	0.5	-1.5	-0.5	1	2.5	0	1.5	0.5
		15.12	-23	-23	-23	-21.5	-21	-22.5	-21.5	-19.5	-22				15.12	-0.5	1.5	0.5	-0.5	1	1.5	-0.5	1.5	2
		15.16	-23	-22.5	-23	-20.5	-21.5	-23.5	-21.5	-19	-21.5				15.16	0	1	1	0	0	-1.5	0.5	1.5	2
		15.2	-23	-23	-23.5	-21.5	-22	-22	-20.5	-19	-21.5				15.2	-1	0	-1.5	0	-0.5	-1.5	1.5	1.5	1
		15.24	-21.5	-23.5	-24.5	-22	-21	-21.5	-20.5	-20	-22.5				15.24	-0.5	0	-2	1.5	0.5	-1	1	0.5	0
		15.28	-21	-24.5	-24	-21.5	-21.5	-22	-20.5	-20	-21.5				15.28	0	-0.5	-1.5	2.5	2	-1	0.5	1	0.5
		15.32	-22.5	-24.5	-23.5	-22.5	-22.5	-22.5	-21	-20.5	-20.5				15.32	0	-0.5	-0.5	1	1.5	-1	-0.5	1.5	2
		15.36	-25	-24	-23.5	-23.5	-22	-22.5	-20.5	-20.5	-20.5				15.36	-1.5	1	-1	0	2	0	0.5	2	1.5
		15.4	-25	-24	-24	-24	-21.5	-21.5	-19	-20	-21				15.4	-2	0.5	-1.5	-2	1.5	1	2	1.5	1
		15.44	-23.5	-24	-24.5	-24	-21.5	-19	-19	-19	-21.5				15.44	-1	-0.5	-2.5	-3	0	3	1	1	0.5
		15.48	-23.5	-25	-25	-22.5	-21.5	-19.5	-19	-19	-21.5				15.48	-1.5	-0.5	-2	-2.5	-1	2.5	1	0.5	1
		15.52	-22.5	-26	-24	-22	-21.5	-21	-20.5	-20	-21				15.52	-2	-0.5	-0.5	0	-1	1.5	0	2	1.5
		15.56	-22	-26	-23.5	-20.5	-22	-22.5	-21	-21	-21				15.56	-1	-0.5	-0.5	2.5	-0.5	1.5	-0.5	3	1.5
		15.6	-23	-25	-23	-20	-23.5	-22.5	-20.5	-21	-21				15.6	-1	-1	-1	2	-1.5	2	0	2.5	1.5
		15.64	-22.5	-24.5	-22	-21	-24	-23	-20.5	-20.5	-21.5				15.64	0.5	-0.5	-1	1	-1.5	2	1	1.5	0.5
		15.68	-22.5	-24.5	-21.5	-22.5	-24.5	-24	-20.5	-20	-20.5				15.68	0.5	-0.5	-1	-0.5	-2	0	1.5	1.5	1
		15.72	-22	-24	-22	-23.5	-22.5	-24	-22.5	-20	-20				15.72	0.5	-1	-1	-1	-1	-2	-0.5	2	0.5
		15.76	-21.5	-24.5	-23.5	-23	-21.5	-23	-22.5	-19	-21				15.76	0	-0.5	-1	0.5	1	-2	-2	2.5	-0.5
		15.8	-22.5	-24.5	-24	-23	-21.5	-22	-22.5	-18.5	-23.5				15.8	-1	-0.5	-2	0.5	2	-1	-1.5	2.5	-0.5
		15.84	-24	-23.5	-23.5	-23	-20.5	-21	-21	-18.5	-22.5				15.84	-1	0.5	-2.5	-1	1.5	1.5	0.5	2	2
		15.88	-24	-22.5	-23.5	-24	-19.5	-21.5	-19.5	-19.5	-22.5				15.88	-0.5	0.5	-1.5	-1.5	1	1.5	1.5	1	1
		15.92	-23.5	-21.5	-23	-23.5	-21	-21.5	-19	-19	-22.5				15.92	-0.5	1	-0.5	-0.5	0.5	1.5	1	1	1
		15.96	-22.5	-22	-24	-23.5	-21	-22	-20	-19	-22.5				15.96	-1	0.5	-1	-1	0	1	-0.5	2.5	1.5
		16	-23	-22	-24	-23	-21.5	-22	-19.5	-18.5	-21.5				16	-2	0.5	-2	-0.5	-0.5	1	0	3	1.5
		16.04	-22	-21.5	-23.5	-22.5	-22.5	-22.5	-18.5	-18.5	-20.5				16.04	-0.5	0	-2.5	0	-1.5	0	1	2.5	1.5
		16.08	-21	-24	-23	-23.5	-23.5	-21.5	-20	-20	-20.5				16.08	-0.5	-0.5	-2	-1	-1	0	1	1.5	1.5
		16.12	-22	-24.5	-23	-23.5	-24.5	-20	-20	-21	-21.5				16.12	0	-1.5	-1	-1.5	-0.5	0.5	0.5	1	1
		16.16	-23.5	-23.5	-23.5	-22.5	-23	-19.5	-19.5	-19.5	-22				16.16	-0.5	-0.5	0	0.5	1	0.5	1	1	0.5
		16.2	-22.5	-23	-23	-21.5	-22.5	-21	-20.5	-19	-21				16.2	0.5	0.5	0.5	1.5	0.5	0	0	0.5	1
		16.24	-22.5	-23.5	-22.5	-21.5	-22.5	-21	-22	-19.5	-20.5				16.24	0	-0.5	-0.5	1	0.5	-0.5	-1.5	0	2
		16.28	-22	-24.5	-23.5	-20.5	-22	-22	-21.5	-19.5	-20.5				16.28	1	-1.5	-1	1.5	1	-1	-1.5	0.5	2.5
		16.32	-23	-24	-23	-20.5	-21.5	-21	-20	-19	-21				16.32	1	-1	-2	1.5	0	1	-0.5	2.5	3
		16.36	-24	-24	-24	-21.5	-20.5	-22	-18.5	-19.5	-21.5				16.36	1	-0.5	-2	1	0.5	2	1.5	2.5	1
		16.4	-24	-24.5	-24.5	-22.5	-21	-22.5	-19	-20	-22				16.4	0	-1	-3	1	1.5	1	1.5	3	0
		16.44	-24	-25	-24	-23.5	-22.5	-22	-19	-21.5	-22				16.44	-2	-1.5	-2.5	0	1.5	-0.5	2.5	1	1
		16.48	-23.5	-24.5	-23.5	-24	-23.5	-22.5	-19	-21.5	-21.5				16.48	-1.5	-2	-2.5	-1	1	-0.5	2.5	0	1.5
		16.52	-24.5	-23.5	-22.5	-23	-23	-21.5	-18.5	-20.5	-21				16.52	-0.5	0	0	-1	-1	1	2	0.5	2
		16.56	-24.5	-23	-23.5	-22	-23	-21.5	-21	-20	-22				16.56	-1	0	-0.5	1	0	1	-0.5	1	1
		16.6	-24.5	-24	-23	-21	-23	-22.5	-21.5	-20	-23				16.6	-2.5	-1	-1	1	0	0	-0.5	1.5	0.5
		16.64	-24	-24.5	-22	-21	-22.5	-22.5	-20.5	-18.5	-23				16.64	-2.5	-1	-1	0.5	-0.5	-1	1	2	-0.5
		16.68	-23.5	-24.5	-22.5	-22	-22.5	-22	-19.5	-18.5	-23				16.68	-2	-1	-1	-0.5	-1.5	-1	1	2	-1.5
		16.72	-23	-23.5	-23.5	-21.5	-23.5	-21.5	-21	-20.5	-23				16.72	-0.5	0	-1	0	-2	0.5	-1	0.5	-1
		16.76	-22	-23.5	-23.5	-22.5	-23.5	-21	-22	-20	-23.5				16.76	1	1	-0.5	1	-1	2	-1.5	1	-0.5
		16.8	-22.5	-24	-23	-22.5	-22	-21	-22	-20	-23.5				16.8	1	2	-0.5	2	0.5	1	-1.5	2	1
		16.84	-22	-25.5	-23	-23	-20.5	-20.5	-21	-20.5	-22.5				16.84	1	1	0	2	1	-0.5	0	2	1.5
		16.88	-22.5	-25.5	-23	-24	-21	-21	-21	-20.5	-21				16.88	1.5	0	0	0.5	0	-1	0.5	1.5	1
		16.92	-23	-24	-24	-23	-22	-22.5	-20	-19.5	-21				16.92	2	1	0	-0.5	0	-1	0.5	2.5	1.5
		16.96	-23	-23	-23	-23	-24.5	-22.5	-19	-20	-22				16.96	1	1	-0.5	-1.5	-1.5	-0.5	0	2	1.5
		17	-23.5	-24	-22	-22	-24	-22	-19.5	-20.5	-23.5				17	0	1	0	-0.5	-1	-0.5	0	0.5	1
		17.04	-24.5	-23	-22	-22.5	-22	-22	-20	-19	-24.5				17.04	0	1.5	0	-1	-1	-0.5	-0.5	1	0.5
		17.08	-24.5	-23	-21.5	-22	-22	-23	-21	-18	-24				17.08	0	1.5	0.5	0	-0.5	0	-1	2	1.5
		17.12	-24	-23.5	-22	-22	-22	-21.5	-21.5	-19	-22				17.12	0	1	-0.5	1	1	1.5	-1	2.5	2
		17.16	-24.5	-24	-22.5	-22.5	-21.5	-20	-21.5	-20.5	-21.5				17.16	0	1	-1	0.5	3	2	-1	1.5	1.5
		17.2	-25	-25	-24	-22.5	-21.5	-19.5	-21.5	-21.5	-22				17.2	-0.5	1	-2.5	0	1	2	-1	0.5	1.5
		17.24	-25.5	-24	-24	-22.5	-23	-20.5	-21	-21.5	-22.5				17.24	-1	1.5	-2	-0.5	-1	2	-1	0	1.5
		17.28	-23.5	-24	-22.5	-22.5	-22.5	-20	-20.5	-20	-22.5				17.28	1	0.5	-1	-0.5	0.5	2	0.5	1	-0.5
		17.32	-22	-23.5	-21.5	-24	-22	-20.5	-21	-19	-21.5				17.32	2.5	0	1	-0.5	1.5	1	1	1.5	0.5
		17.36	-21.5	-23.5	-21.5	-23.5	-22	-21.5	-20	-19	-21.5				17.36	2.5	-0.5	1	-1	1	-1	1.5	2	1.5
		17.4	-22	-24	-22	-23	-22	-23	-18.5	-20	-20.5				17.4	1	-1	1.5	-0.5	-0.5	-1.5	1.5	2	3
		17.44	-23.5	-25	-23	-22	-21	-22.5	-19	-21	-22				17.44	0	0	0	-1	-1	-0.5	0.5	1.5	3
		17.48	-25	-25.5	-24.5	-21	-22	-21.5	-19.5	-22	-24				17.48	0	0.5	-0.5	-0.5	-1.5	0	0	0.5	2.5
		17.52	-24	-24.5	-22.5	-21.5	-21.5	-20.5	-19.5	-21.5	-23.5				17.52	0.5	1.5	0	0	-0.5	-1	0	1	2
		17.56	-23	-24	-21.5	-22.5	-20.5	-22	-21	-21	-23.5				17.56	-0.5	0.5	0	0	1	-1.5	-0.5	0	1
		17.6	-23	-26	-21.5	-22.5	-19	-22	-21	-20	-23.5				17.6	-1	-0.5	0	-0.5	2.5	0	0	0	0
		17.64	-22.5	-25.5	-23	-21.5	-20	-21.5	-20.5	-20.5	-23				17.64	-0.5	-0.5	-1	1	1.5	2	0.5	0.5	-1
		17.68	-23	-25	-23.5	-21.5	-21	-21.5	-19.5	-20.5	-22				17.68	-0.5	-1	-1.5	0.5	1	1	1	1.5	0
		17.72	-24.5	-25	-23.5	-21.5	-22.5	-21	-19	-19.5	-21				17.72	-0.5	0	-1.5	-0.5	0.5	1	2	2	2
		17.76	-24	-25	-23.5	-22	-23.5	-21	-19.5	-19.5	-21.5				17.76	0	0	-1	0.5	0.5	0	0	2	1.5
		17.8	-22.5	-25	-23.5	-23	-23	-22.5	-20	-20	-22.5				17.8	2	0	0.5	0	1	-0.5	-1	1	0
		17.84	-21.5	-24.5	-23	-21.5	-22	-21.5	-20.5	-20	-23				17.84	1.5	1	1	0.5	0.5	0.5	-1	0	0.5
		17.88	-23	-24.5	-22.5	-20	-22	-19.5	-19.5	-19.5	-22				17.88	0.5	1	0.5	0	-1	2.5	0.5	0.5	1
		17.92	-24.5	-24.5	-23.5	-21.5	-22	-19	-20	-20	-21				17.92	-0.5	1	-1	-1	-2	2	0.5	1	1
		17.96	-25.5	-24	-24	-22.5	-22.5	-20.5	-20.5	-20.5	-20				17.96	-2	0	-2.5	-1.5	-2	0	0.5	1	2
		18	-25	-23	-23	-23	-22	-20.5	-20.5	-21	-20				18	-2	0	-1	-1	-1	1	1	1.5	1.5
		18.04	-24	-23	-22.5	-23.5	-22	-21	-20	-21	-20.5				18.04	-1	0	0.5	-0.5	1	0	1	2	1.5
		18.08	-23.5	-24	-22	-23.5	-21.5	-21	-19.5	-21	-21				18.08	-1.5	0	0.5	-0.5	1	0	1	2	1.5
		18.12	-23	-25	-22	-22	-20	-20.5	-20.5	-19.5	-22				18.12	-0.5	0	0	0.5	1	-0.5	0.5	1.5	1.5
		18.16	-22.5	-25.5	-23	-21.5	-19.5	-20.5	-22.5	-21	-22				18.16	1	0	0.5	1.5	0.5	0.5	-0.5	0.5	0.5
		18.2	-23	-24	-24	-22	-21.5	-21	-23	-23	-22				18.2	0.5	1.5	-1.5	0.5	-0.5	1.5	-0.5	0	0
		18.24	-23.5	-24.5	-23.5	-21.5	-21.5	-20.5	-22	-22.5	-21				18.24	0.5	1.5	-2.5	1	-0.5	1.5	0.5	0	1
		18.28	-24	-25.5	-23.5	-21.5	-20	-20.5	-19.5	-20.5	-21.5				18.28	0.5	0	-2	1	1.5	1	2	1	0.5
		18.32	-23	-24.5	-22.5	-22	-20	-19	-19	-20	-22				18.32	0	0	-1.5	0	2	2	1.5	1	0.5
		18.36	-23.5	-23	-21	-21	-20.5	-20.5	-19	-20	-21.5				18.36	0	-0.5	-1	-0.5	2	0.5	1.5	2	0.5
		18.4	-24	-22.5	-21	-21.5	-22	-21	-20	-19.5	-21.5				18.4	0	-0.5	0.5	-1.5	-1	0	1	2	1.5
		18.44	-24	-22.5	-21.5	-23.5	-22.5	-20.5	-21	-20	-21.5				18.44	0	-0.5	0	-2.5	-1.5	1	0.5	0.5	2
		18.48	-23	-24.5	-21.5	-24.5	-22.5	-19	-21.5	-20.5	-21				18.48	-0.5	-1.5	1.5	-2	-1	2	0	0	1.5
		18.52	-22.5	-25	-22.5	-24.5	-21.5	-18.5	-20.5	-20.5	-21				18.52	-0.5	-1.5	1.5	-0.5	0	1	1	0	0.5
		18.56	-22	-24	-24	-25	-21	-18	-20.5	-20	-21.5				18.56	0	-0.5	0	-1	0.5	1	1	1	0.5
		18.6	-22.5	-23	-24	-24.5	-21	-19	-20.5	-20	-21				18.6	0	-0.5	-0.5	-1.5	0	1	1.5	2	2
		18.64	-23.5	-23	-24.5	-23.5	-21	-20	-22.5	-20.5	-21				18.64	0	0.5	-1.5	-1.5	-0.5	0	1	1	3
		18.68	-24	-23.5	-24.5	-23	-22.5	-21	-23.5	-19.5	-22				18.68	0	1	-2	-1	-1	-0.5	0.5	0.5	2.5
		18.72	-23.5	-24	-24	-22.5	-23.5	-21	-23	-19.5	-23				18.72	0.5	0	-1.5	-0.5	-1.5	0.5	0	0	1.5
		18.76	-24.5	-25.5	-23	-22.5	-24.5	-22.5	-20	-19.5	-22.5				18.76	1	-1.5	-0.5	0.5	-1	-0.5	1	0	3
		18.8	-25.5	-26	-22.5	-22.5	-23.5	-21.5	-18.5	-20.5	-21.5				18.8	1.5	-1	0	0	0	0	3	-0.5	3
		18.84	-25.5	-25.5	-24	-22.5	-22	-21	-18.5	-20	-20.5				18.84	2	-1	-0.5	-0.5	1	1.5	3.5	0	2.5
		18.88	-25	-24.5	-25.5	-23.5	-21.5	-21	-20	-20	-22				18.88	-0.5	-0.5	-1.5	0	1.5	2.5	2	0.5	2
		18.92	-23.5	-24.5	-24	-23	-22.5	-20.5	-22	-20	-21				18.92	-0.5	0	-0.5	0.5	1	2	1	0	2.5
		18.96	-22	-24	-23	-24.5	-23	-20	-21.5	-20	-21.5				18.96	0	0	-1	-1	0	2	0	1.5	1.5
		19	-22.5	-22.5	-23	-25.5	-23	-20	-20.5	-20	-21.5				19	0.5	1	-1.5	-2	-1.5	1	1	2.5	1.5
		19.04	-23.5	-23	-23.5	-25	-22.5	-20	-20	-20.5	-21				19.04	1	0.5	-1.5	-1	-2	0	1	1	1.5
		19.08	-23	-22.5	-23.5	-24	-22.5	-20	-21	-20.5	-21.5				19.08	-1	-0.5	-2	1	-1	-1.5	-0.5	0	1
		19.12	-22.5	-23.5	-23.5	-23.5	-21.5	-20.5	-21.5	-20.5	-22				19.12	-1	-1	-2	1.5	-1	-1.5	-1	0	-0.5
		19.16	-22	-23.5	-23.5	-24	-20	-20	-22	-20	-21.5				19.16	0	-1	-1.5	1	0	0	-1	1	-1
		19.2	-22.5	-23	-23	-23.5	-20	-19.5	-22	-20	-20.5				19.2	0.5	0	-0.5	0.5	0.5	0	0	2	-1
		19.24	-22.5	-23	-22	-24	-21	-20.5	-21.5	-20	-19.5				19.24	0.5	-1	0	-1	1.5	0	0	2	1
		19.28	-23	-22.5	-22	-24	-20.5	-20.5	-20.5	-19.5	-19.5				19.28	0.5	0.5	0	-2.5	2	0.5	1	1.5	1.5
		19.32	-23.5	-23.5	-22.5	-24.5	-21	-21	-20.5	-18.5	-19.5				19.32	1	0.5	-0.5	-2	2	1	0.5	1	2
		19.36	-25.5	-23	-22.5	-23	-21	-20.5	-20.5	-18.5	-19.5				19.36	-0.5	1	-0.5	-0.5	0.5	1	1	0.5	1
		19.4	-25	-22.5	-22.5	-23.5	-21.5	-21	-20	-20	-21				19.4	0	1	-0.5	-0.5	0.5	0.5	1	0	1
		19.44	-24	-23	-23	-23	-22	-20	-19	-22	-22.5				19.44	0.5	-1	0.5	-0.5	1	1	1	0	1
		19.48	-24	-24	-23.5	-22.5	-23	-19.5	-19	-22	-24				19.48	-0.5	-2.5	0	-1	0.5	1.5	1	0.5	0.5
		19.52	-24.5	-24	-22.5	-24	-24	-20.5	-19.5	-21	-23				19.52	0	-2	0	-2	-1	1.5	1.5	1	0
		19.56	-23.5	-25	-23	-24	-23	-21	-20	-21	-23.5				19.56	0.5	-2.5	-1	-2	0	0	0.5	0	-0.5
		19.6	-23.5	-25	-23	-24	-21.5	-20	-21	-20.5	-23.5				19.6	0	-3	-1	-1	0	0	-0.5	-0.5	0
		19.64	-23	-24	-23.5	-22.5	-21	-19.5	-21.5	-20	-22				19.64	-0.5	-2.5	-1	0	-0.5	0.5	-1.5	-0.5	1
		19.68	-22.5	-23.5	-23.5	-21	-22	-20	-22	-20	-21				19.68	0	-1	-1	1.5	-2	1.5	-1	0.5	1.5
		19.72	-23.5	-22.5	-22.5	-20.5	-21.5	-20.5	-21.5	-20.5	-21				19.72	0	0.5	-1.5	1.5	-1	1	0.5	2.5	0
		19.76	-23.5	-21.5	-22	-21.5	-22	-21	-20	-20	-21.5				19.76	-1	1.5	-1	1.5	-2	-0.5	0.5	2.5	0.5
		19.8	-24	-22	-21.5	-21.5	-23	-20	-19.5	-19.5	-21				19.8	-1	0.5	-1	1	-2.5	0.5	1.5	1.5	1.5
		19.84	-23	-23	-22	-23.5	-23	-20	-19	-19.5	-21				19.84	-0.5	-1.5	0	-1.5	-1.5	1	1.5	0.5	1
		19.88	-23.5	-23	-23	-24.5	-21.5	-20.5	-20	-20.5	-22				19.88	-1	-1	-0.5	-2.5	-1.5	1	0	-0.5	1
		19.92	-24.5	-23.5	-23.5	-25	-20.5	-20.5	-20	-21	-22				19.92	-2	-0.5	-0.5	-1.5	-1	-0.5	0.5	-0.5	1
		19.96	-23.5	-24	-23	-25	-21	-20.5	-19.5	-21	-22.5				19.96	-0.5	0	-1	-0.5	-1	-1	1	0	1
		20	-23	-23	-23.5	-23	-21	-21	-19	-21	-23				20	0	0.5	-1.5	1	1	-0.5	2.5	-0.5	0
		20.04	-24.5	-22.5	-23.5	-20.5	-22	-21.5	-19.5	-20.5	-22				20.04	-1	1.5	-2	1.5	1	0	1.5	-0.5	1
		20.08	-23.5	-22.5	-23	-21	-21.5	-21	-21	-21	-20.5				20.08	-1	0.5	-2.5	0.5	1.5	0.5	0.5	0	1
		20.12	-23	-23	-22	-22.5	-21	-21.5	-22	-21.5	-20				20.12	-1.5	-0.5	-1	0	1.5	1.5	-0.5	0.5	1.5
		20.16	-23	-24	-21.5	-23	-22.5	-22	-20	-21.5	-21				20.16	-1.5	-1	-1	0.5	1	0.5	-0.5	0	0.5
		20.2	-24.5	-23.5	-21	-23.5	-24	-21.5	-19	-21	-23				20.2	-1.5	-1.5	-1.5	0	-0.5	0	0.5	1	-1
		20.24	-24	-22.5	-22	-23	-23	-20.5	-18.5	-20	-22.5				20.24	-0.5	0	-1.5	-0.5	-0.5	0	0.5	0.5	0.5
		20.28	-24	-23.5	-23	-22.5	-22	-20.5	-19	-20	-21.5				20.28	-1	0	-2	-0.5	0	1	1	0.5	0.5
		20.32	-24	-23.5	-23	-22	-21	-20	-20	-18.5	-21.5				20.32	-1	0	-2	-0.5	0.5	1.5	1	1.5	1
		20.36	-23.5	-24.5	-22	-21.5	-21.5	-20	-20.5	-19	-22				20.36	-0.5	-1	-2	-0.5	-0.5	0.5	1.5	1	1.5
		20.4	-23.5	-25	-22	-21.5	-22	-21.5	-21	-18.5	-21.5				20.4	-0.5	-1.5	-1.5	-1	-0.5	-1	1	1	2
		20.44	-24	-24.5	-23.5	-22.5	-21	-21	-20.5	-18.5	-21.5				20.44	-1	-0.5	-2	-1.5	0.5	0	0	0	1
		20.48	-24	-24.5	-23.5	-22.5	-21.5	-20	-20.5	-19.5	-21.5				20.48	-1.5	-0.5	-1	-1	0	0.5	-0.5	-1.5	0
		20.52	-23.5	-24	-23	-21.5	-22	-21	-20	-20	-23				20.52	-1.5	-0.5	-1.5	0	-0.5	1	0.5	-1.5	-0.5
		20.56	-23.5	-24.5	-22	-22	-22.5	-20.5	-19	-21	-23.5				20.56	-1.5	-1	-1	-1	-1	0.5	0.5	-1.5	0
		20.6	-23.5	-24	-22.5	-22.5	-22	-19	-19	-21	-23.5				20.6	-0.5	-1	-1	0	-0.5	1.5	0.5	0	-1
		20.64	-24.5	-23	-23.5	-22.5	-20.5	-19	-18.5	-20.5	-22.5				20.64	-0.5	-1	-1	0	0.5	2	1	-1	-1
		20.68	-25	-23.5	-22.5	-21.5	-20.5	-20.5	-19.5	-21.5	-22.5				20.68	-1	-0.5	-0.5	1	0.5	1.5	1	-0.5	-1
		20.72	-24	-23.5	-22	-21.5	-20.5	-20.5	-19.5	-21	-22				20.72	-0.5	-1.5	-1.5	0	1	1.5	1.5	1	0
		20.76	-23	-23	-21.5	-23	-20	-21	-19	-20.5	-22.5				20.76	0	-2	-1.5	-1	1.5	2	1.5	0.5	1
		20.8	-24.5	-24	-22.5	-23.5	-20	-20.5	-20.5	-19.5	-23.5				20.8	0	-2	-1	-1	1.5	2	1.5	1	1
		20.84	-24.5	-24.5	-24.5	-23.5	-22	-21.5	-21	-19.5	-23.5				20.84	0	-1	-2	-1	0.5	0.5	1	0.5	0.5
		20.88	-23.5	-24.5	-25	-25	-22.5	-22	-21	-21	-23				20.88	-1	-1.5	-3	-2.5	-1	0	0	0	1
		20.92	-21.5	-23.5	-25.5	-24.5	-22.5	-21.5	-21	-21.5	-21				20.92	-1.5	-0.5	-2.5	-2.5	-2.5	0.5	-1	0.5	2
		20.96	-21.5	-24.5	-24.5	-23.5	-21	-20	-21	-22.5	-20.5				20.96	-2	0.5	-2.5	-1	-2	0.5	-0.5	-1	2.5
		21	-22	-24	-23.5	-23	-21	-20	-20	-23	-20.5				21	0	0.5	-2	0	-0.5	0	1.5	-2.5	2.5
		21.04	-21	-23	-24	-23.5	-21.5	-20.5	-20	-22	-20.5				21.04	0	0	-2.5	0	-0.5	0.5	1.5	-2.5	2.5
		21.08	-21	-22	-23.5	-23.5	-21.5	-20	-19.5	-19	-21.5				21.08	0.5	0	-0.5	0	0	1	0.5	-0.5	1.5
		21.12	-22.5	-22.5	-23.5	-22.5	-20.5	-20	-20	-18	-23				21.12	0	-0.5	0.5	-0.5	1.5	1.5	0	1.5	0
		21.16	-23	-23.5	-24	-22	-20	-21	-20.5	-19	-22				21.16	-0.5	-1	-0.5	0	2	1.5	0.5	2	0
		21.2	-24	-24	-25	-22	-20.5	-21.5	-20.5	-21	-21.5				21.2	-1	0	-1.5	0	1	0	1	1	0.5
		21.24	-24	-24.5	-24	-22.5	-21.5	-22	-20	-21.5	-21.5				21.24	-0.5	-0.5	-1.5	1	0.5	-0.5	1.5	0.5	0.5
		21.28	-24	-24	-23.5	-22.5	-21.5	-20.5	-19.5	-21	-19.5				21.28	-0.5	-0.5	-2	1	1.5	1.5	1	0.5	2.5
		21.32	-23.5	-23	-24	-21.5	-22	-19.5	-19.5	-20.5	-18				21.32	0	-1	-1.5	1	1.5	1.5	0	0.5	4
		21.36	-24	-23	-24.5	-21	-21	-20	-19	-21	-20				21.36	-0.5	-0.5	-1.5	1.5	2	1	0	0.5	2.5
		21.4	-24.5	-22.5	-25	-21.5	-20.5	-20.5	-19	-21.5	-20.5				21.4	0	0.5	-1	1.5	1	0.5	0	1	1
		21.44	-24	-22.5	-24	-22.5	-21.5	-21	-19	-21	-21.5				21.44	1	1	-1	1	0	1	-0.5	1	-1
		21.48	-22.5	-22.5	-24	-24	-22.5	-21.5	-20.5	-21	-22				21.48	2	-0.5	-2	-0.5	0	2	-1	0.5	-1
		21.52	-23	-23	-25	-24.5	-22.5	-20.5	-21.5	-20.5	-21.5				21.52	0	-1	-2.5	-1.5	-0.5	3	-1.5	1	-0.5
		21.56	-24.5	-23.5	-26	-24	-22.5	-21	-21	-20.5	-21				21.56	-1	-1	-2	-2	-1	2.5	0	0.5	1
		21.6	-24	-23.5	-26	-23	-22	-21.5	-20	-20	-21.5				21.6	-0.5	-0.5	-2	-1.5	-0.5	1.5	1.5	-0.5	0.5
		21.64	-23	-23	-24.5	-23	-21.5	-22	-18	-20.5	-21.5				21.64	1.5	-1	-1	-1	0	1	2.5	-1	-0.5
		21.68	-24.5	-22	-24	-22.5	-22	-21.5	-17.5	-20	-21				21.68	0	-1	-0.5	-2	0.5	0	2	0.5	-1
		21.72	-25	-21.5	-24	-21.5	-24	-21	-18	-20	-22.5				21.72	-0.5	0	-1.5	-1.5	0	-0.5	1.5	1	0
		21.76	-24	-22	-25.5	-22	-23	-20	-19.5	-20	-23				21.76	0	0.5	-2.5	-1.5	1	0.5	1.5	1.5	1
		21.8	-23.5	-22	-23	-22	-22	-20.5	-19.5	-20	-22.5				21.8	0	1.5	-1	-0.5	2	1.5	1.5	0.5	1.5
		21.84	-24	-22.5	-21.5	-21	-22	-21.5	-20	-20.5	-23.5				21.84	-1	1.5	-1	0.5	2	1.5	0	-0.5	1
		21.88	-25	-22	-21.5	-22	-21.5	-22	-20.5	-20	-23				21.88	-1.5	1	-0.5	0.5	0.5	1	0	-0.5	0.5
		21.92	-25.5	-22	-21.5	-23	-22	-21.5	-20.5	-19	-22.5				21.92	-2	1.5	-0.5	0	-0.5	0.5	0	-0.5	1
		21.96	-25	-22.5	-22	-23	-22	-21.5	-20	-19	-22.5				21.96	-2	1.5	-1	0.5	-1	-0.5	0.5	0	1.5
		22	-24	-23.5	-23	-23.5	-21	-21	-20	-20	-23				22	-1.5	0	-2.5	1	0	0	1	0	1
		22.04	-24	-23	-23.5	-24	-21.5	-21	-20.5	-20.5	-22				22.04	-1.5	0	-3	-0.5	-0.5	0	1	0	1.5
		22.08	-24	-23.5	-24.5	-23.5	-21.5	-20.5	-22	-22	-21.5				22.08	-1	-1.5	-2.5	-1	0	0.5	-0.5	0.5	1.5
		22.12	-24	-23	-23	-24	-21.5	-19.5	-21.5	-21.5	-21.5				22.12	-0.5	-1	-1.5	-2.5	1	1	0.5	1	1.5
		22.16	-23.5	-23	-23	-22.5	-21.5	-20	-21	-21	-21.5				22.16	-1	0	-2	-1.5	0.5	0.5	0.5	1	1.5
		22.2	-23.5	-22.5	-24	-22	-21.5	-21	-19.5	-20	-22				22.2	-0.5	0	-1.5	-1.5	-0.5	0	1.5	1	2
		22.24	-23.5	-22.5	-24	-22	-22.5	-20.5	-19	-20	-22.5				22.24	-0.5	0.5	-1	-1	-2	0	0	0	0.5
		22.28	-24.5	-21	-22.5	-23.5	-23.5	-21	-19.5	-20	-22.5				22.28	-1	1.5	0.5	-2	-2	0	-1	0	-0.5
		22.32	-25	-20.5	-22.5	-24.5	-23.5	-21	-20.5	-20.5	-21				22.32	-0.5	2	0.5	-1	-1	1.5	-1	0.5	1.5
		22.36	-24	-22.5	-23.5	-24.5	-22.5	-21	-21	-21.5	-21				22.36	0.5	2.5	-0.5	-1	1	2	-1.5	0	2
		22.4	-24	-23.5	-24.5	-23.5	-21.5	-20.5	-21.5	-21.5	-21				22.4	1	2.5	-2	-1	1.5	1.5	-1	-0.5	2
		22.44	-24	-23.5	-23.5	-22.5	-21.5	-20.5	-21	-20.5	-22				22.44	0.5	2	-0.5	0	1.5	1	0.5	0.5	1
		22.48	-24	-24	-23	-21.5	-21.5	-20.5	-19	-19.5	-23				22.48	-1	1	0	1.5	1	1	1.5	1.5	0.5
		22.52	-23.5	-24	-23.5	-21	-22	-20	-19	-19	-22				22.52	-1	1	-0.5	1.5	-0.5	1	1	1	0.5
		22.56	-23	-24	-23	-22	-21.5	-18.5	-20.5	-19	-21.5				22.56	-2	1.5	-0.5	1	-1	2	0.5	0.5	-1
		22.6	-25	-22.5	-23	-23.5	-21	-18.5	-21	-18.5	-20.5				22.6	-3	2.5	-2	0	0.5	2	0.5	1.5	0.5
		22.64	-25	-22.5	-23	-24.5	-22	-18.5	-21	-19.5	-20.5				22.64	-1.5	1.5	-1.5	-2	1	1	0.5	1.5	1
		22.68	-24	-22	-22.5	-23.5	-22	-19	-21	-20.5	-20.5				22.68	0.5	1	1	-1	1.5	1	0	1	0.5
		22.72	-23.5	-23	-22.5	-23	-23	-19	-22	-20.5	-19.5				22.72	0.5	0.5	1.5	1	1	2	-0.5	1	0.5
		22.76	-24.5	-23.5	-23	-23	-22.5	-19	-21	-19.5	-18				22.76	-1	0	0	0.5	0	2.5	0	1.5	1.5
		22.8	-24.5	-22.5	-23	-23	-21.5	-19	-19.5	-19	-19				22.8	-1	0	-0.5	-0.5	0.5	2.5	1.5	2	1.5
		22.84	-23	-23.5	-23.5	-22	-22	-19.5	-21	-20	-20.5				22.84	0	0	-1.5	-0.5	1	1.5	1.5	0	2
		22.88	-23	-24.5	-24	-21	-22.5	-19	-20.5	-20.5	-21				22.88	0	0	-2.5	0	1	1.5	2	-1	2
		22.92	-24	-24.5	-23.5	-22	-23	-20.5	-19.5	-20.5	-21.5				22.92	0	0	-2.5	1	0.5	1.5	1.5	0	0.5
		22.96	-23.5	-23.5	-23	-23	-23	-20.5	-18.5	-20.5	-20.5				22.96	0	1	-1	0.5	0.5	1	1	0.5	1.5
		23	-24	-24	-22.5	-23.5	-22.5	-20	-19	-19.5	-20				23	-0.5	1	-0.5	0.5	0.5	1	1	1	1.5
		23.04	-24.5	-24.5	-23	-23.5	-23	-20	-21	-20	-21.5				23.04	-2	0	-0.5	0.5	0	1.5	0	1	1
		23.08	-23.5	-24	-22.5	-23	-23.5	-21.5	-20.5	-19.5	-21.5				23.08	-1	0	-0.5	1	-0.5	1	0.5	2	1.5
		23.12	-24.5	-23.5	-23.5	-22.5	-22.5	-21.5	-19.5	-20	-21				23.12	-1.5	1	-1.5	0.5	1	0.5	1	2	1.5
		23.16	-24	-23.5	-24	-23	-21	-21	-20	-20	-20.5				23.16	-1.5	0	-2	-1	1	0	0.5	0.5	2.5
		23.2	-23	-25	-23.5	-22.5	-21	-20	-20.5	-21	-21.5				23.2	-0.5	-1	-1	-0.5	0.5	0.5	0.5	-0.5	1.5
		23.24	-22.5	-25	-24	-23	-20.5	-20.5	-20	-21.5	-22.5				23.24	1	-1.5	-1	0	1	1	0.5	0	1
		23.28	-23.5	-25	-25	-24	-21.5	-21	-19.5	-21.5	-22				23.28	0	-1	-1	-1.5	1.5	1	0	-0.5	1.5
		23.32	-23.5	-24.5	-25	-24	-22	-21	-19.5	-22	-20.5				23.32	0	-1.5	-2	-1	1	2	0.5	-0.5	1.5
		23.36	-23.5	-24	-24	-23.5	-20.5	-20.5	-21	-22	-20				23.36	0.5	-1	-2	1	1.5	3	1	0	1
		23.4	-23.5	-24.5	-23.5	-22.5	-21	-21	-21	-22	-20				23.4	0	-0.5	-1.5	2	1	3	1.5	0	2
		23.44	-24	-23	-23.5	-21	-21.5	-22	-20	-21	-20				23.44	0	0.5	-1	2	0.5	2	2	0	1.5
		23.48	-25	-22.5	-23	-21.5	-20.5	-21	-20	-19.5	-22				23.48	0.5	0.5	0.5	1	2	2	1	1.5	0.5
		23.52	-24	-23	-22.5	-22.5	-20.5	-20.5	-20	-20	-22.5				23.52	0.5	0.5	1	-0.5	2	2	0.5	1	0
		23.56	-21.5	-23	-22.5	-24	-22.5	-21	-20	-21	-21.5				23.56	0.5	0.5	1.5	-0.5	0.5	0.5	0	0	0.5
		23.6	-20	-22.5	-23	-22.5	-23.5	-20.5	-19.5	-21.5	-21				23.6	0.5	1	0	0.5	-0.5	2	0.5	0	1.5
		23.64	-21.5	-23	-24	-22.5	-24	-20	-19.5	-22	-21				23.64	0.5	0.5	-2	0	-1.5	2.5	1	0	1.5
		23.68	-22.5	-23	-23	-23.5	-24	-20.5	-18	-21	-20.5				23.68	1	0.5	-1.5	-1	-0.5	1.5	2.5	1.5	1.5
		23.72	-23.5	-24.5	-22.5	-24	-23.5	-20.5	-19	-21	-20.5				23.72	0.5	-2	-1	-1.5	-1	3	2.5	1	1.5
		23.76	-25.5	-24	-22.5	-23	-23	-19.5	-19	-20.5	-22				23.76	-1.5	-2	0	-1.5	-1	3	2.5	1.5	1.5
		23.8	-25.5	-24	-22.5	-23	-22.5	-18	-19.5	-21	-23.5				23.8	-1.5	-1.5	0.5	-0.5	-1	1.5	2	0.5	0.5
		23.84	-24.5	-23.5	-23	-23	-21.5	-17.5	-18	-21	-22				23.84	-1.5	0	-0.5	-1.5	0.5	1	1.5	0	0.5
		23.88	-23.5	-23.5	-23.5	-24	-20.5	-18.5	-19	-21.5	-21.5				23.88	-0.5	0.5	-2	-0.5	1	1.5	0	-1	1
		23.92	-23.5	-23	-23.5	-25	-20.5	-19.5	-20.5	-21	-20				23.92	0	0.5	-1	-1	0	1	0	0	1.5
		23.96	-24	-23	-22.5	-24	-20.5	-19.5	-20.5	-20.5	-20				23.96	-0.5	0.5	0	0.5	0	2	0	1	2
		24	-24	-24	-23.5	-24	-20.5	-20.5	-20	-20	-21				24	-1	0	-1	1	-0.5	2.5	1	0.5	1
		24.04	-24	-24	-24	-25	-21	-20.5	-19.5	-20	-21.5				24.04	0	-0.5	-2.5	-0.5	0	2	1.5	0.5	1
		24.08	-22.5	-24.5	-24	-23.5	-20.5	-20	-19	-20.5	-21				24.08	0	-1	-2	-1	1.5	1	2	-0.5	1.5
		24.12	-21	-24.5	-23	-23	-20.5	-20	-20	-19	-22				24.12	0.5	-1	-0.5	-1	2.5	0	1.5	0.5	1
		24.16	-22.5	-24.5	-23	-23.5	-20.5	-20.5	-21	-19	-21.5				24.16	0	-1.5	0	-1	1	0.5	1	1.5	1.5
		24.2	-22.5	-23.5	-23.5	-24	-21	-21.5	-20.5	-20	-23				24.2	0	-1	-0.5	-1	0.5	1	0.5	1	1
		24.24	-23.5	-23	-24	-24.5	-21.5	-21.5	-19.5	-21.5	-23				24.24	-1	0	-0.5	-1	0.5	1.5	0.5	0.5	1
		24.28	-23.5	-24.5	-24	-24	-22	-20	-18.5	-21.5	-22.5				24.28	-0.5	-0.5	-0.5	0.5	0.5	3	1	0.5	1.5
		24.32	-24	-25.5	-23	-23.5	-23	-19	-18.5	-20.5	-21				24.32	-0.5	-1	0.5	0	1	4	0.5	0.5	2.5
		24.36	-24	-25.5	-23	-23	-22	-19	-19.5	-20	-19.5				24.36	-0.5	-2	-0.5	0	2	3.5	-1	1.5	2
		24.4	-24	-24.5	-23.5	-23	-21.5	-19.5	-19	-20	-20.5				24.4	0	-1.5	-2	-0.5	2	2	-1	1.5	1
		24.44	-23.5	-24	-24	-23.5	-20.5	-21	-19.5	-19	-22				24.44	0	-1.5	-2	-1	1.5	1	0	3	1.5
		24.48	-24	-23.5	-24	-23.5	-21	-22	-20.5	-20	-22				24.48	0	-0.5	-0.5	-2	0.5	0.5	0	2.5	2
		24.52	-24.5	-22.5	-24	-23.5	-20	-22	-20.5	-20.5	-20.5				24.52	-1	1	-1	-1.5	1.5	0.5	-0.5	1	3
		24.56	-24.5	-22	-25	-23	-20.5	-22	-20.5	-20	-21				24.56	-1	0.5	-2.5	0	3	0.5	0	1	2
		24.6	-23.5	-23	-23.5	-23	-20.5	-21	-21	-19	-21.5				24.6	0	-0.5	-1.5	0	2.5	0	-0.5	2	1.5
		24.64	-22.5	-24.5	-22	-22.5	-20.5	-21.5	-20.5	-19	-22				24.64	0.5	-2.5	0	0.5	2.5	-1	0.5	2	2
		24.68	-22.5	-25	-22.5	-22.5	-22	-21	-20	-20	-22.5				24.68	0.5	-3	-0.5	0.5	1.5	0.5	1	1.5	3
		24.72	-21.5	-24	-23.5	-22.5	-23.5	-20.5	-19.5	-20.5	-22.5				24.72	0.5	-2.5	-1	-0.5	-0.5	1	1	0.5	3
		24.76	-22	-23	-23.5	-24	-23.5	-20	-19	-20	-23				24.76	0.5	-0.5	0	-1.5	-1	2	1.5	1	1
		24.8	-24.5	-22.5	-22.5	-22.5	-23.5	-19	-19.5	-19.5	-23				24.8	-0.5	1.5	1	-0.5	-0.5	2	1.5	2	-0.5
		24.84	-24.5	-22.5	-21.5	-22	-22.5	-18.5	-20.5	-19.5	-23				24.84	-1	1.5	0.5	0	1	2.5	0.5	2.5	-0.5
		24.88	-25	-23.5	-21.5	-23.5	-21	-20	-20.5	-20	-22				24.88	-2.5	1	-0.5	-1.5	1	2	1	1	0.5
		24.92	-24.5	-23.5	-23	-23.5	-21.5	-21.5	-21	-19.5	-21				24.92	-1.5	0.5	-1.5	-2	0	0.5	0.5	1	1.5
		24.96	-22.5	-23	-23.5	-24	-21.5	-22.5	-21	-18	-20.5				24.96	0.5	1.5	-0.5	-1.5	0.5	-0.5	0	2	2
		25	-21	-23.5	-23.5	-24	-22	-22.5	-21	-18.5	-20				25	2.5	0.5	0	-1	0	0.5	0.5	2.5	2
		25.04	-21.5	-24	-24	-23	-22	-22.5	-21.5	-19	-20				25.04	2.5	0	0	-1	-1	0.5	-0.5	1.5	3
		25.08	-22.5	-23	-24.5	-23	-22	-22.5	-20.5	-19.5	-21				25.08	0	0	-0.5	-1.5	-0.5	0	-1	1	3
		25.12	-24	-23.5	-23.5	-22	-22.5	-20	-20.5	-20	-21.5				25.12	-1.5	-0.5	-1	-0.5	0.5	1.5	0	0	3
		25.16	-23.5	-23.5	-22.5	-23.5	-23	-18.5	-21	-20.5	-22				25.16	-1	-0.5	0	-1	1	2.5	0	0	2
		25.2	-23	-23.5	-23.5	-25	-23	-19	-21.5	-21	-22.5				25.2	0	-1	0.5	-1	0	2	-1.5	0	1
		25.24	-22.5	-24	-23	-25.5	-23	-20.5	-21.5	-20.5	-23				25.24	-0.5	-1	2	-1.5	-0.5	2	-1.5	0	1
		25.28	-21.5	-23.5	-21.5	-25.5	-22	-21	-21	-19	-22.5				25.28	0	-0.5	2.5	-2.5	0.5	2.5	0	2	1
		25.32	-22.5	-24	-21	-26	-21.5	-21	-20.5	-18.5	-23.5				25.32	-1	-0.5	2	-3	1	2	1	2.5	0
		25.36	-24	-23.5	-21.5	-24	-22.5	-20	-20	-18.5	-23.5				25.36	-1	0	1	-1	0.5	1	1	2	0.5
		25.4	-24.5	-23.5	-23	-22.5	-22	-19	-19.5	-19	-23				25.4	-0.5	1	-0.5	0	0.5	1	1.5	1.5	1
		25.44	-24.5	-24.5	-24	-20	-21	-19.5	-19	-20	-22				25.44	-1	2.5	-2	0	2	2	2	0.5	1.5
		25.48	-23.5	-24	-25	-19.5	-20	-20	-18.5	-18.5	-22				25.48	0	2	-2.5	-0.5	2.5	2.5	2	1.5	1.5
		25.52	-21.5	-23.5	-24.5	-21.5	-20.5	-20	-18.5	-18	-22				25.52	0.5	2	-1.5	-2	2	2	1.5	2.5	2
		25.56	-21.5	-24	-23.5	-23.5	-21	-20	-20	-18	-22				25.56	0.5	0.5	0.5	-1	1	1	2	1.5	3
		25.6	-22.5	-24	-23.5	-23	-22	-20	-20.5	-19	-23				25.6	0	0	0.5	0.5	0	1	2	0.5	1.5
		25.64	-23.5	-22.5	-23.5	-22	-23	-19	-21	-19.5	-22				25.64	0	0.5	-0.5	1	0	1.5	1.5	1.5	1.5
		25.68	-24.5	-22.5	-23.5	-21.5	-23.5	-19	-20	-19	-21				25.68	1	0.5	-1	0.5	0.5	1.5	2	1.5	2
		25.72	-24.5	-22	-24.5	-21.5	-24	-18.5	-19.5	-19.5	-22				25.72	1	0	-0.5	0.5	0	2.5	2	1	1.5
		25.76	-25.5	-23	-24	-22	-23.5	-18	-20	-19.5	-23				25.76	0.5	-1	0	0.5	0.5	3	0.5	2	1
		25.8	-26.5	-24	-24	-21.5	-22	-20	-19.5	-20	-23.5				25.8	-0.5	-1	1.5	1.5	0.5	3	0	1	0
		25.84	-25.5	-24	-24.5	-22.5	-21.5	-21	-20	-19.5	-23				25.84	-1	1	0.5	0.5	0.5	2	-0.5	1	0.5
		25.88	-25.5	-24.5	-24.5	-24.5	-21.5	-20.5	-19.5	-20	-22.5				25.88	0.5	0.5	-0.5	-2	0.5	1.5	0.5	0.5	1.5
		25.92	-25.5	-24.5	-23.5	-24.5	-21	-21.5	-20.5	-19.5	-22				25.92	-0.5	-1	0.5	-2	1	1.5	0.5	0.5	2
		25.96	-24.5	-23.5	-23.5	-23.5	-21	-21.5	-20	-19.5	-21.5				25.96	-1	1	0	0	0.5	2.5	-0.5	1	1.5
		26	-23	-22.5	-23.5	-24.5	-22	-21.5	-19.5	-19	-21.5				26	-0.5	3.5	0	0	1	2	-0.5	1.5	1.5
		26.04	-22	-22	-24	-25	-21	-21.5	-19.5	-18.5	-22				26.04	-0.5	3.5	0.5	-0.5	2	1	0.5	1	1.5
		26.08	-22	-23.5	-24.5	-24.5	-20.5	-22	-20.5	-19.5	-22.5				26.08	0.5	1	0	-1.5	2.5	1	0.5	1	1.5
		26.12	-21	-24	-25	-24	-21.5	-22	-20	-20.5	-22				26.12	1.5	-0.5	-1.5	-1.5	0	1	0.5	1	1
		26.16	-22	-23.5	-24	-24.5	-22.5	-22.5	-20	-21	-22				26.16	1	0	-1	-1	-1	1	0	2	-0.5
		26.2	-22.5	-23	-23	-23.5	-22.5	-23	-19.5	-21.5	-20.5				26.2	1.5	0	0.5	-0.5	0	2	1	1.5	0.5
		26.24	-22	-24	-24	-23	-22	-23.5	-20	-21.5	-21				26.24	1	-2	1	0	0.5	1.5	0.5	0	1.5
		26.28	-24	-24.5	-24.5	-23	-21.5	-23.5	-19	-21	-22				26.28	-1	-2	0.5	-0.5	1	0.5	1	0	1.5
		26.32	-25	-25	-24.5	-23.5	-21.5	-23	-19.5	-22	-23				26.32	-1.5	0	1	-1	0.5	0.5	1.5	-1	0
		26.36	-25	-24.5	-23	-24	-21.5	-21.5	-19	-21	-22.5				26.36	-2	0.5	1	-0.5	1.5	0.5	2	-0.5	0
		26.4	-24.5	-23.5	-23	-23	-20.5	-20.5	-19	-20	-22				26.4	-1	2.5	0.5	0.5	2	0.5	2	-0.5	1
		26.44	-24.5	-23.5	-23	-22.5	-19.5	-19.5	-20	-18.5	-22				26.44	0.5	2	0.5	0.5	1	1	1	0	1
		26.48	-24.5	-24.5	-24	-22	-20	-20.5	-21	-18.5	-21.5				26.48	0.5	0	0	0.5	-0.5	1.5	0.5	1.5	1.5
		26.52	-24.5	-24.5	-24.5	-22	-20	-22	-20.5	-19.5	-22				26.52	-0.5	-0.5	-1.5	0	0.5	1	1	1.5	0.5
		26.56	-22.5	-26	-24	-23	-21	-22	-20.5	-19	-21.5				26.56	0.5	-0.5	-0.5	0	0.5	1.5	1	2	1
		26.6	-22	-25.5	-24.5	-23.5	-20.5	-21.5	-19.5	-19	-21.5				26.6	1.5	0.5	0.5	0.5	1	2.5	1.5	2	1.5
		26.64	-23	-25	-24	-24	-22.5	-20	-19	-18.5	-20.5				26.64	1.5	0	1	0.5	0	3	2.5	2	1.5
		26.68	-23.5	-24.5	-24	-23.5	-24.5	-19.5	-19.5	-18.5	-20.5				26.68	0	-0.5	0	1	-1	2.5	1.5	1.5	1.5
		26.72	-22.5	-24.5	-24	-24	-25	-20	-20.5	-19	-21.5				26.72	0	-0.5	-1	-0.5	-1	3	0	2	1
		26.76	-22.5	-24.5	-23.5	-24	-24	-21	-21	-20.5	-21.5				26.76	1	-0.5	-2	-0.5	-0.5	2.5	-0.5	0.5	1.5
		26.8	-23.5	-24	-23	-23.5	-22	-21.5	-20.5	-21.5	-20.5				26.8	1	0	-1.5	-1.5	0	3	1.5	-2	2
		26.84	-23.5	-23.5	-23	-23.5	-20.5	-21.5	-20.5	-21.5	-20.5				26.84	1	0.5	-1	-1	1	4	2	-1.5	1.5
		26.88	-24	-22.5	-23	-24	-20	-21.5	-19.5	-20.5	-21				26.88	1	2	-0.5	-1	2	3.5	1.5	-0.5	1
		26.92	-24.5	-22.5	-23	-22.5	-21.5	-21	-19	-21	-23				26.92	1	2	-1	-0.5	1	3	0.5	0	0.5
		26.96	-25.5	-24	-24	-22	-22.5	-20.5	-19.5	-21.5	-23				26.96	-0.5	0.5	-1	0	0.5	3	1	0	0.5
		27	-25	-24	-23.5	-22.5	-21.5	-19.5	-21	-21.5	-21.5				27	-1	0	-1	1	1	3	0.5	0.5	1
		27.04	-25	-22	-23	-23	-21.5	-19.5	-21.5	-20.5	-20.5				27.04	-1	1.5	-0.5	1	-0.5	2.5	0	1.5	3
		27.08	-25.5	-22.5	-22.5	-24	-22.5	-20	-20	-20.5	-20.5				27.08	-0.5	1	-0.5	0	-0.5	2.5	0	1	3
		27.12	-25	-23	-22.5	-25	-23	-19.5	-20.5	-20.5	-22				27.12	0	0.5	0.5	-2	0	3	0	0	1.5
		27.16	-23.5	-24	-23.5	-26	-22	-20	-21	-19.5	-22.5				27.16	0.5	0	0	-2.5	1.5	3.5	0	1	1
		27.2	-24.5	-23.5	-23.5	-25.5	-22	-20	-22	-18.5	-22.5				27.2	0	1	0.5	-1	1.5	3	0	2	0.5
		27.24	-25.5	-24	-23	-25	-22	-20.5	-21	-19	-23				27.24	0	1	1	0	0	1.5	-0.5	2	0.5
		27.28	-24	-24.5	-23	-24	-22	-20.5	-21.5	-20	-22.5				27.28	0	0.5	0.5	-0.5	-0.5	0	-1	0.5	0.5
		27.32	-24	-23.5	-24	-23.5	-23	-21	-21.5	-20.5	-22.5				27.32	-0.5	0	-0.5	-1.5	-1.5	0	-1.5	-1	0.5
		27.36	-24.5	-24	-25	-23.5	-22.5	-20	-21.5	-21	-22.5				27.36	-1.5	-0.5	-1	-1	-1	1	-0.5	-0.5	0
		27.4	-23.5	-25	-24	-23.5	-22.5	-20.5	-21	-20	-22				27.4	-1	-1	-2	-0.5	-1	1.5	1	0.5	0.5
		27.44	-23.5	-25	-22	-22.5	-22.5	-20	-20	-18.5	-23				27.44	-0.5	-1	0.5	0	-1	2	2	0.5	1
		27.48	-23.5	-24.5	-21	-22.5	-23.5	-20.5	-19.5	-18.5	-23				27.48	0.5	-1	2	-0.5	-0.5	1.5	1.5	0	1.5
		27.52	-24	-24	-22	-22.5	-22.5	-19.5	-19.5	-20	-22				27.52	1	-0.5	1	-1	0.5	1.5	1	-1	2
		27.56	-24	-22.5	-23.5	-23	-23	-20.5	-19.5	-20.5	-22				27.56	1	1	-1	-1	0	2	1	0	1.5
		27.6	-24	-22.5	-24	-24.5	-22.5	-20	-20	-21.5	-23				27.6	0	2	-1.5	-2	0	3	0.5	0.5	1.5
		27.64	-24.5	-22.5	-24	-24	-23.5	-21	-20.5	-21	-21.5				27.64	-0.5	2.5	-1.5	-1.5	0	2	0	1	2
		27.68	-24	-23	-24.5	-23.5	-23	-20.5	-21.5	-19.5	-21				27.68	0	2	-0.5	0	1	1.5	1	1.5	1.5
		27.72	-23.5	-22.5	-23	-24	-22.5	-21.5	-21.5	-19	-20.5				27.72	1	2	1.5	-0.5	0.5	0.5	1	1.5	1
		27.76	-25	-22.5	-22.5	-23	-22.5	-21	-20.5	-19	-20				27.76	0.5	2.5	2	0.5	0	0.5	2.5	1	1.5
		27.8	-25	-22.5	-22.5	-21.5	-22	-20.5	-21	-19.5	-20				27.8	-1	2	1.5	1.5	0	2.5	1.5	0	2
		27.84	-24	-23	-23.5	-21.5	-22	-19.5	-21	-19.5	-21.5				27.84	-1	0.5	1	2	0	3.5	1	0	2
		27.88	-23	-23.5	-24	-21	-22.5	-20	-22	-21	-22.5				27.88	-1.5	-0.5	0	1	0	3	0.5	-1.5	2.5
		27.92	-23	-24.5	-24	-22	-23.5	-21	-21	-20.5	-22				27.92	-1.5	-2	-0.5	-1	-1	2	1	-1.5	2
		27.96	-23.5	-25	-25	-23	-23.5	-22.5	-21.5	-19	-22				27.96	0	-2	0	-1	-0.5	2.5	0.5	0.5	1
		28	-25	-24	-25	-22.5	-23	-23	-22	-19	-22				28	-0.5	-0.5	0	1	0	2.5	0	1	-0.5
		28.04	-25	-23	-25	-22	-23.5	-22	-21.5	-20	-21				28.04	-0.5	0.5	-1	2	1	2	0.5	2	-0.5
		28.08	-23.5	-22.5	-24	-22.5	-25	-21	-21	-20	-20				28.08	0	1	-0.5	1.5	0.5	1.5	1	2	1
		28.12	-23	-24	-23.5	-24	-24	-20	-20.5	-20	-20.5				28.12	0	-0.5	-0.5	0.5	0	2	1.5	1	2
		28.16	-23	-23.5	-22.5	-24.5	-23	-20	-21.5	-20	-21.5				28.16	0	0	1	0	-0.5	1.5	2	1	1.5
		28.2	-23	-23	-22	-25	-23.5	-20.5	-21.5	-20.5	-22				28.2	-0.5	0.5	1.5	0	-1	0.5	2.5	1	0.5
		28.24	-23	-23.5	-22	-24	-24	-21	-21	-20.5	-22				28.24	-0.5	1	2	-1	0	0	2	1.5	0
		28.28	-22.5	-23.5	-23	-23.5	-23	-20.5	-20.5	-20.5	-23				28.28	0.5	2	1	-2.5	1.5	0	1	0.5	-0.5
		28.32	-23	-23	-23.5	-24	-22.5	-20.5	-20.5	-19.5	-24.5				28.32	1	2	1	-3.5	1.5	-0.5	0	0	-0.5
		28.36	-24	-23	-23.5	-23.5	-21.5	-21	-20.5	-20	-23				28.36	1	1	0.5	-3.5	3	0.5	-0.5	0	1.5
		28.4	-24	-23	-23	-23	-21.5	-23	-20	-18.5	-22				28.4	0.5	0.5	0.5	-1	2.5	1	0	2.5	2.5
		28.44	-24.5	-22.5	-23	-22.5	-21.5	-24	-20	-19.5	-22				28.44	-0.5	0	0	1	2.5	1.5	1	2.5	1
		28.48	-24	-22.5	-22.5	-22.5	-21.5	-23	-21	-20	-21.5				28.48	-0.5	0.5	0.5	1.5	1.5	1	-0.5	3	1
		28.52	-24	-24	-23	-22.5	-22	-21	-21.5	-20.5	-22				28.52	-1	-0.5	0	0.5	1	1.5	-1	1.5	1.5
		28.56	-24	-24	-23.5	-23	-22.5	-21	-20.5	-20.5	-23				28.56	-1	-1	0	-0.5	0	1	0	-0.5	0.5
		28.6	-24.5	-25	-23	-22	-23.5	-21	-20.5	-20.5	-23.5				28.6	-0.5	-1.5	0	-0.5	-0.5	0	0.5	-1	-0.5
		28.64	-24.5	-25	-22.5	-22	-22.5	-20.5	-20.5	-20	-23.5				28.64	1.5	0.5	0	-0.5	0	1	1	0.5	-1
		28.68	-24.5	-25	-23.5	-22	-22.5	-20	-21	-20	-22				28.68	2	1.5	-0.5	-0.5	-1	2.5	1.5	1	0
		28.72	-24.5	-23.5	-23.5	-23	-22	-19.5	-21.5	-20	-21				28.72	0	2	0.5	-1.5	-1.5	2	1.5	0.5	0
		28.76	-24.5	-24	-22.5	-23	-21.5	-20.5	-21	-21	-21				28.76	-0.5	1.5	1	-1	-1.5	1	1	-1	-0.5
		28.8	-25.5	-24.5	-22	-22.5	-22	-20.5	-20.5	-21.5	-21.5				28.8	-0.5	1.5	1	-0.5	-0.5	1.5	0	-1	-0.5
		28.84	-25	-23.5	-22.5	-22	-23	-20	-20	-20.5	-22				28.84	0.5	1	0	1	0.5	1	0	0	0.5
		28.88	-24.5	-22	-23.5	-21	-22	-20	-20.5	-19.5	-22				28.88	0.5	0.5	-0.5	2	1	1	-0.5	2	0.5
		28.92	-23.5	-22.5	-23.5	-22.5	-21	-20	-22.5	-18.5	-21				28.92	-0.5	0	0.5	1.5	1	2	-2	2.5	1
		28.96	-22.5	-22.5	-24	-23	-21.5	-18	-22.5	-18	-22				28.96	0	1	0.5	1.5	1	3.5	-1	1.5	-0.5
		29	-23	-24	-23.5	-22.5	-22	-18.5	-22	-18	-22				29	0.5	1	0.5	0.5	1	2.5	-0.5	2	0.5
		29.04	-24	-24	-24	-22	-22	-18.5	-21.5	-20	-22				29.04	0	0.5	-1	1	0.5	2.5	0	0.5	1
		29.08	-23.5	-22	-24.5	-23	-22	-18.5	-21	-20.5	-21				29.08	-0.5	1	-1.5	0	-0.5	2.5	-0.5	0.5	1
		29.12	-22.5	-20.5	-24.5	-22.5	-21.5	-18	-19.5	-20	-21				29.12	0.5	1.5	-1.5	-1	0.5	2.5	-0.5	1.5	1
		29.16	-22	-22.5	-24	-23.5	-21.5	-19	-18.5	-20	-22				29.16	1.5	1	-1	-1.5	0.5	2	0	0.5	1
		29.2	-22	-23.5	-23.5	-23	-21.5	-20.5	-20	-21	-22				29.2	1.5	-0.5	-0.5	-1	1.5	1	0.5	-0.5	1.5
		29.24	-22.5	-24	-24	-22	-22.5	-21.5	-21.5	-20.5	-22				29.24	1.5	-1.5	-0.5	-1	2	1	-0.5	0.5	1.5
		29.28	-22.5	-24	-23.5	-22	-22.5	-22	-22	-21	-23.5				29.28	1	-1.5	-0.5	-0.5	1	0	-1	1.5	0
		29.32	-23	-23.5	-22.5	-23	-22.5	-22.5	-21.5	-21	-24				29.32	0.5	-1.5	0	-2	0.5	-1	-1	1	-2
		29.36	-24	-22.5	-22.5	-23.5	-22.5	-21	-20.5	-19	-24				29.36	-0.5	0	0.5	-1.5	-1	1	0	0.5	-1.5
		29.4	-24.5	-23	-24	-24.5	-23.5	-21.5	-19.5	-18	-23				29.4	-2	0.5	1	-1	-1	1.5	1.5	0	0
		29.44	-25	-23	-24	-22.5	-23	-20	-20	-19.5	-21.5				29.44	-1.5	1	1	0.5	-1	1	0.5	-1	1.5
		29.48	-24	-23.5	-23	-22	-23	-20	-20	-21.5	-20.5				29.48	0.5	0	1	0	-1	1	-1	-1.5	2.5
		29.52	-23	-24	-23	-22	-22.5	-20.5	-20	-21.5	-21				29.52	1.5	-1.5	0	0	-1	0	0.5	-0.5	1.5
		29.56	-23	-23	-22.5	-23	-21.5	-21	-20.5	-21.5	-21				29.56	0	-0.5	-0.5	-1	-0.5	0.5	1.5	-1	0
		29.6	-23	-23.5	-22.5	-23	-22	-20	-20.5	-20.5	-21				29.6	1	-0.5	-1.5	0	0	2	1.5	-1.5	-2
		29.64	-23.5	-23	-22	-24	-21	-21	-19.5	-20	-21				29.64	1.5	0	-0.5	-0.5	0.5	2	1.5	-1	-2
		29.68	-23.5	-21.5	-22	-24	-21	-22	-19.5	-20	-21.5				29.68	0	1	-0.5	-1	0	2	0	0.5	-1
		29.72	-23.5	-21.5	-22	-24	-22	-24	-19.5	-21	-21.5				29.72	-2	1	0	-1	-1.5	1.5	0	0.5	-0.5
		29.76	-21.5	-22.5	-22	-23.5	-22.5	-22.5	-20	-20	-22.5				29.76	-1	1	0	0	-1.5	1.5	0.5	1	-1
		29.8	-22	-22.5	-21.5	-23	-21.5	-21	-22	-20	-22				29.8	-1.5	1.5	1.5	1	0	1	0	1	-0.5
		29.84	-22	-21.5	-21	-22.5	-21	-20	-22	-20	-22				29.84	-0.5	2.5	1.5	1	1	1	-1	1.5	-0.5
		29.88	-22.5	-22.5	-21.5	-22.5	-20	-19	-22	-20.5	-22.5				29.88	-0.5	1.5	1.5	1	1.5	1.5	-1.5	0.5	-0.5
		29.92	-24	-22.5	-21.5	-22	-21.5	-19	-21	-20.5	-21				29.92	-0.5	0	0.5	2	1	2.5	0	0	0.5
		29.96	-25.5	-23.5	-22.5	-22.5	-21.5	-19	-20	-21.5	-21				29.96	0	-1.5	0	2	1.5	3	0	-1	1.5
		30	-25.5	-23	-22	-21.5	-21	-19.5	-20.5	-21	-21.5				30	0.5	-1.5	-0.5	1.5	0.5	2.5	0	-1	1.5
		30.04	-22.5	-23	-21.5	-23	-21.5	-20	-21	-20	-22				30.04	1.5	-1.5	-1	0	0	3	0	0.5	0.5
		30.08	-21	-23	-21.5	-23	-22	-19	-20.5	-20.5	-21.5				30.08	2	-0.5	-1	-0.5	0	4.5	0.5	1	1
		30.12	-21.5	-23	-22.5	-24	-22	-19	-19.5	-20	-21				30.12	2	1	-1	-1.5	0.5	3	1	1	1.5
		30.16	-22	-23	-23.5	-23.5	-22	-19	-19.5	-19.5	-21.5				30.16	3	1.5	-1.5	0	1	2.5	2	1	0.5
		30.2	-23	-23	-23.5	-22	-21.5	-21	-18	-19	-21.5				30.2	1	0.5	-1.5	1	0	1.5	2.5	1	-0.5
		30.24	-22.5	-22.5	-23.5	-22.5	-21.5	-21	-18.5	-18.5	-22.5				30.24	-0.5	0	-1.5	1.5	-0.5	2	2	2	-1.5
		30.28	-22	-22.5	-23	-23	-21.5	-21	-19	-19	-21.5				30.28	1	0	-1	0	-0.5	3	1	3	-1
		30.32	-22	-22	-23.5	-24	-21.5	-22.5	-20.5	-19.5	-20.5				30.32	0	1	-1	-1.5	1	1.5	-1	2.5	0.5
		30.36	-22.5	-23.5	-23.5	-23.5	-21.5	-23	-21.5	-19	-21				30.36	-0.5	0	-1.5	-2	1.5	0.5	-1	1	0.5
		30.4	-23.5	-24	-22.5	-22	-21.5	-22	-22.5	-19	-24.5				30.4	-0.5	0.5	0	-1	1.5	1	-1.5	0	-0.5
		30.44	-24.5	-22.5	-22	-20	-22.5	-21	-22.5	-19	-24.5				30.44	-1	1	1	0.5	0	1	-2.5	1	-0.5
		30.48	-25	-22	-23	-21	-22.5	-19	-21.5	-19.5	-23				30.48	-1.5	-0.5	-0.5	1	0	2.5	-1.5	1.5	1
		30.52	-24.5	-23.5	-24	-23	-23	-21	-21.5	-20.5	-21.5				30.52	-1.5	-2	-1.5	1	-0.5	3.5	0.5	1	2
		30.56	-23.5	-25	-24.5	-23	-23	-23	-20.5	-19.5	-20.5				30.56	-0.5	-1	-2	2	-1	2.5	0.5	1	3
		30.6	-22.5	-24.5	-23.5	-23.5	-22.5	-22.5	-19.5	-19.5	-21				30.6	0.5	1	-2	0.5	-0.5	2.5	1.5	0.5	4
		30.64	-22	-24.5	-23.5	-22.5	-22.5	-22.5	-20	-19.5	-21.5				30.64	2	0	-2.5	0.5	0	1.5	1	2	3
		30.68	-22.5	-23	-23	-21.5	-22.5	-20.5	-21.5	-19	-22.5				30.68	2	-1.5	-1	0.5	1	2.5	0	2.5	2
		30.72	-23.5	-23	-22	-22.5	-22	-20	-22	-19	-23.5				30.72	1	-1.5	0.5	0.5	1	3.5	0.5	2	1
		30.76	-23	-23	-23	-21	-22.5	-20	-22.5	-19	-24				30.76	0.5	-1	-0.5	1.5	0	4	0.5	1.5	1.5
		30.8	-22.5	-22.5	-23	-22	-22	-21	-21.5	-19.5	-24				30.8	0	0	-0.5	1.5	0	3.5	1	1	1.5
		30.84	-21	-23	-22.5	-22.5	-21	-22	-20.5	-20	-23.5				30.84	1	-1.5	-1.5	0	0.5	2.5	0.5	1.5	1
		30.88	-21.5	-22.5	-21.5	-23.5	-22	-22	-20.5	-20	-23				30.88	1.5	-1	-1.5	0	-0.5	1.5	0.5	1.5	1
		30.92	-22	-21.5	-21.5	-24	-22.5	-21.5	-21	-20.5	-23.5				30.92	1.5	0	0	-0.5	0	1	0	1	1
		30.96	-22.5	-22	-21	-23.5	-22.5	-20.5	-21	-21	-23.5				30.96	0.5	1	1	-1	1.5	1.5	-0.5	1.5	2
		31	-23.5	-22.5	-21.5	-22.5	-21	-20.5	-20.5	-21.5	-22				31	-1	0.5	1	0.5	2.5	1.5	0	0.5	2.5
		31.04	-23.5	-22	-22.5	-23	-21.5	-20.5	-19	-20.5	-22.5				31.04	-2	-1	-0.5	0.5	1	2.5	1	0.5	2.5
		31.08	-25	-22	-23.5	-23.5	-22	-20	-20	-21.5	-21.5				31.08	-2.5	-1	0.5	0	0	4	1	-1	3
		31.12	-25	-22	-23.5	-24	-22	-20	-20.5	-20.5	-21.5				31.12	-2	-0.5	0.5	-1	0	3.5	1	-1.5	3
		31.16	-25	-22	-22	-24	-21	-18.5	-21	-19	-22				31.16	-2	-1.5	1.5	-0.5	0.5	3	0	-0.5	2
		31.2	-24.5	-22	-22	-23.5	-21.5	-19	-21	-19.5	-23				31.2	-1	-1.5	0	0	0	1.5	-1	-0.5	1.5
		31.24	-24	-22	-22.5	-22.5	-21.5	-20	-19.5	-19	-22				31.24	-0.5	-1	-1	0.5	-0.5	0.5	-0.5	-1	1.5
		31.28	-24.5	-22.5	-23	-21.5	-21	-20.5	-19.5	-18.5	-22				31.28	-1.5	0.5	-2	1.5	-0.5	-0.5	0.5	0.5	0.5
		31.32	-24	-23	-23.5	-22.5	-21	-20.5	-20.5	-19	-21.5				31.32	-1.5	0.5	-2	1	0	0.5	0	1	1
		31.36	-23.5	-22	-23.5	-23	-21	-20.5	-20	-18.5	-21.5				31.36	-2	0	-2	-0.5	1	1.5	0.5	2	0.5
		31.4	-23	-22.5	-23	-23	-21.5	-19.5	-19.5	-17	-21.5				31.4	-1	-1	-2	-0.5	1.5	2.5	0.5	2.5	1
		31.44	-23	-23.5	-23.5	-21.5	-21.5	-19	-18.5	-17.5	-21.5				31.44	-0.5	-1	-2	1.5	1	3	1.5	3	1.5
		31.48	-23.5	-24	-23.5	-21	-22.5	-21	-19.5	-18.5	-23				31.48	-0.5	-0.5	-0.5	2	-1	1.5	1	2	2
		31.52	-23.5	-24	-22.5	-22	-23.5	-22	-19	-19.5	-23.5				31.52	-1.5	-1	-0.5	1	-2	2	1.5	1.5	2.5
		31.56	-23	-23.5	-23.5	-22.5	-24	-21.5	-19.5	-21	-24				31.56	-1	0	-1.5	0	-1	3.5	2	-0.5	3
		31.6	-23	-23	-24.5	-23	-23	-21.5	-20.5	-20.5	-22.5				31.6	-1	0	-2	0.5	0	3	1.5	0	3.5
		31.64	-22.5	-23.5	-23.5	-22	-22	-21	-20.5	-19.5	-20				31.64	0.5	-0.5	-0.5	1.5	0.5	1.5	2	1	3
		31.68	-22.5	-23	-22.5	-22.5	-22	-21.5	-18.5	-20.5	-20				31.68	0.5	-0.5	0	1.5	0.5	0	3	1	3
		31.72	-22	-23.5	-23	-23	-22	-21	-19.5	-20.5	-21				31.72	0	-1	0	0	0.5	0	1	-0.5	3.5
		31.76	-22	-25	-23	-24	-22	-21	-20.5	-20	-22				31.76	-0.5	-2	0	0	0.5	0	-0.5	0.5	3
		31.8	-21.5	-25	-21.5	-22.5	-22.5	-21	-22	-19.5	-22				31.8	-1	-1.5	0.5	1	0.5	0.5	-1	1	3.5
		31.84	-21.5	-23.5	-21.5	-22	-21.5	-21	-22	-19.5	-21.5				31.84	-0.5	-0.5	0	1	1	0	-0.5	1	3.5
		31.88	-23	-23.5	-22.5	-22	-19.5	-20.5	-21	-19	-20.5				31.88	-1	0.5	0.5	0	2	0	0.5	2	3.5
		31.92	-24	-24	-23.5	-22	-19.5	-20	-20	-18.5	-21.5				31.92	-2	-0.5	-0.5	-0.5	1.5	1	1	2.5	3.5
		31.96	-23	-23.5	-24.5	-22.5	-21	-20.5	-21	-18	-22				31.96	-1.5	-2	-2	1	0	1	-0.5	3	3.5
		32	-22.5	-23.5	-23.5	-22	-21.5	-21.5	-21.5	-18.5	-22.5				32	-1.5	-2.5	-1.5	2.5	-0.5	0.5	0	2.5	3
		32.04	-24	-24.5	-23	-21.5	-21.5	-21.5	-21	-19	-22.5				32.04	-0.5	-2.5	-1	2.5	0.5	1	-0.5	2	2.5
		32.08	-25	-23.5	-23.5	-22	-22	-20.5	-19	-18	-21.5				32.08	-0.5	-1.5	-2.5	0.5	1	2.5	1	2	2.5
		32.12	-25	-23	-23.5	-22	-23	-20	-18	-18.5	-20.5				32.12	-1	-0.5	-2	0	0	2.5	2.5	1.5	2.5
		32.16	-25.5	-23	-23	-22	-23.5	-20	-18.5	-18.5	-21				32.16	-1	-0.5	-2	-0.5	-2	1	2	1	1.5
		32.2	-24.5	-22.5	-22	-22.5	-23.5	-20.5	-19.5	-19.5	-21				32.2	-1	1	-1.5	-1	-1.5	1	1	0	1.5
		32.24	-23	-23.5	-23	-23	-23	-21	-20	-20	-21				32.24	-1.5	0.5	-1	-1.5	-1	1	0.5	1	1.5
		32.28	-22.5	-23.5	-24	-23.5	-23.5	-22	-20.5	-21	-22				32.28	-1.5	0.5	-1	-3	-1	0.5	0.5	1.5	1.5
		32.32	-23	-23.5	-23	-23.5	-22	-22	-21	-21	-22				32.32	-1	-0.5	-1	-2.5	-0.5	0.5	0.5	1	2.5
		32.36	-23.5	-24	-23	-23.5	-21	-23	-21	-22	-22				32.36	-1	-0.5	-0.5	-1	0	1	0.5	0	2
		32.4	-23.5	-23.5	-23	-23.5	-20	-22	-21	-20.5	-22.5				32.4	-0.5	0.5	-0.5	0.5	0.5	1.5	0.5	1	1
		32.44	-22.5	-23.5	-23	-24	-20.5	-20.5	-20.5	-20	-22				32.44	-1	0.5	-0.5	1	1	2	0.5	1	0.5
		32.48	-22	-24	-23	-22	-20.5	-19.5	-20.5	-20.5	-22.5				32.48	-0.5	0	-0.5	1.5	1.5	2	-0.5	1.5	0
		32.52	-22	-23	-22	-23	-21.5	-19.5	-20	-20	-22				32.52	0.5	0	0	0	1	1.5	0	1.5	0
		32.56	-22.5	-22.5	-22	-22	-22.5	-20.5	-20	-19	-22				32.56	1	0.5	1	-1	0.5	1.5	-0.5	1.5	1
		32.6	-23.5	-22.5	-23	-21.5	-23	-22	-20	-18.5	-21.5				32.6	1	0.5	0.5	-0.5	0	1	-1	1.5	3
		32.64	-24.5	-22.5	-23	-22	-22.5	-22	-21	-17.5	-21				32.64	1.5	0.5	0	-0.5	0.5	1	-0.5	3.5	3.5
		32.68	-24.5	-22.5	-22.5	-22	-21.5	-21	-20.5	-18.5	-22				32.68	0	0.5	0	0	0	0.5	-0.5	3.5	2.5
		32.72	-22.5	-23.5	-22	-21.5	-20.5	-20	-19.5	-20.5	-22				32.72	0.5	-0.5	-1	0	0	1.5	0	2	1.5
		32.76	-23	-24	-23	-21	-20.5	-20	-18.5	-21.5	-21.5				32.76	0	-1	-1.5	1	0.5	1.5	1	1	1.5
		32.8	-24	-24	-24	-22	-22.5	-20.5	-19.5	-20	-21.5				32.8	0	-1.5	-1.5	-0.5	-0.5	0.5	1	2	1.5
		32.84	-24	-23.5	-23	-22	-21.5	-22	-20	-20.5	-21				32.84	-1	-0.5	-0.5	0.5	-0.5	0.5	0.5	1	1
		32.88	-23.5	-23.5	-23	-23	-21	-22	-20.5	-20.5	-21.5				32.88	-0.5	0	-1	0.5	-0.5	1.5	0.5	0.5	1
		32.92	-23.5	-23.5	-22.5	-23.5	-21.5	-21	-20	-20.5	-22				32.92	0	0	0	1.5	0	1.5	0.5	0	1.5
		32.96	-23.5	-23	-22	-23.5	-22	-20	-18.5	-21	-22.5				32.96	0.5	1	0.5	1.5	0.5	2	1	-0.5	1.5
		33	-23.5	-22	-21	-22.5	-22.5	-21	-19	-21	-21.5				33	0.5	1	0	1.5	1	1.5	0.5	0.5	1
		33.04	-22.5	-21.5	-22	-22	-22.5	-21	-20	-20	-21.5				33.04	0.5	2	0	0	1	1.5	0	0	1
		33.08	-23	-22.5	-22.5	-22	-22	-21	-19.5	-19	-21				33.08	-0.5	0.5	0.5	-0.5	1.5	2	0.5	1	2
		33.12	-22.5	-23	-22.5	-21.5	-22	-21	-18.5	-20.5	-21				33.12	1	-1	-0.5	-1	2	2.5	2	0	2
		33.16	-22.5	-23.5	-22.5	-21.5	-21	-22	-19	-21.5	-21				33.16	0.5	-0.5	-1	-1.5	2.5	1.5	2	-1	3
		33.2	-23.5	-23.5	-22.5	-23	-21	-22.5	-19	-21.5	-20.5				33.2	0	0	-1	-1	1.5	0	1.5	-2	3.5
		33.24	-23.5	-24	-22.5	-23	-22.5	-22	-19.5	-20	-20.5				33.24	-0.5	0	-0.5	-0.5	-1	1	1.5	-1	3.5
		33.28	-23	-24	-22.5	-23	-22.5	-22	-19.5	-19.5	-21.5				33.28	0.5	0	-0.5	-1	-1	1.5	1	-1	3
		33.32	-24	-24.5	-23	-23	-22	-20	-18	-19.5	-22.5				33.32	0.5	-1	-1.5	-1	-0.5	2.5	1.5	-1	1.5
		33.36	-24.5	-24.5	-22.5	-22.5	-22	-21.5	-18	-19.5	-23				33.36	1	-2.5	0	-1.5	0	2.5	1	0	0.5
		33.4	-23.5	-23.5	-21.5	-23	-22	-23.5	-20	-19	-22				33.4	0.5	-1.5	0	-0.5	0	1.5	0	1	0.5
		33.44	-21.5	-22	-21	-23	-22	-22.5	-19.5	-19	-21.5				33.44	1	1	0	0	0	1	0.5	1.5	0
		33.48	-21.5	-23	-22	-23	-22.5	-21.5	-19.5	-18.5	-20.5				33.48	0	1	0.5	0	0.5	0.5	0	1.5	2
		33.52	-23	-24	-23.5	-22.5	-23	-21	-19.5	-18	-21				33.52	-0.5	1.5	-1.5	0.5	0.5	1	0	2.5	2
		33.56	-24	-24	-23.5	-21	-23.5	-21.5	-20.5	-18.5	-22				33.56	-0.5	1	-2	1.5	-0.5	1	-0.5	2	2
		33.6	-25	-23.5	-23.5	-21	-23.5	-22	-20.5	-20	-22				33.6	-1	0.5	-1.5	0.5	-1	0.5	0	0	2.5
		33.64	-25	-23.5	-23.5	-21	-23.5	-23	-20	-20.5	-21.5				33.64	-0.5	-0.5	-2.5	0	-2.5	0.5	0.5	-0.5	2
		33.68	-25	-24.5	-21.5	-22.5	-22.5	-22	-19	-21.5	-22				33.68	0	-2	-1.5	-0.5	-1.5	0.5	0.5	-0.5	2
		33.72	-24	-24	-19.5	-23.5	-21.5	-21	-20	-22.5	-22.5				33.72	1	-1	-0.5	-0.5	0	1	0	-1	1.5
		33.76	-23	-24	-19.5	-24	-21.5	-21.5	-20	-22	-23				33.76	1.5	0	-0.5	-0.5	0.5	0.5	0.5	0	2
		33.8	-23	-24.5	-21.5	-23.5	-22	-21	-19.5	-21	-23				33.8	1	0	-1.5	-0.5	1	1	1.5	0	2
		33.84	-23.5	-24.5	-23	-22.5	-21.5	-20.5	-19	-20.5	-22.5				33.84	0	-1	-2	0	1	1	2	1	2
		33.88	-24	-23	-23.5	-21.5	-21.5	-20	-19.5	-19	-23				33.88	-0.5	-1	-2	0	-0.5	1	1.5	0.5	1
		33.92	-23.5	-23	-23	-21	-21.5	-19.5	-19.5	-18.5	-24.5				33.92	0.5	0	0	-0.5	-0.5	1.5	0.5	0.5	0.5
		33.96	-23.5	-23	-22	-22.5	-21.5	-20	-20	-19.5	-24				33.96	1	0.5	0.5	-1	0	1.5	0	0	1
		34	-24.5	-23.5	-21.5	-23.5	-22	-20.5	-20.5	-21	-22.5				34	0.5	0.5	-0.5	-0.5	0	0	-0.5	0.5	1
		34.04	-24	-23	-21.5	-24	-22.5	-20	-20	-22	-22				34.04	-0.5	1	-1	-1.5	-0.5	2	0.5	0	1.5
		34.08	-22.5	-23	-22	-23.5	-22	-20	-20.5	-21.5	-22				34.08	-0.5	2	-1	-0.5	0	2.5	1.5	1	3
		34.12	-22	-23	-22	-23.5	-21	-22	-21	-20.5	-23				34.12	1	1.5	-0.5	-0.5	0.5	1	1.5	1.5	3
		34.16	-22	-23	-21	-22	-21	-23	-21	-19	-23				34.16	1.5	0	1	0.5	1	-0.5	0.5	1	2.5
		34.2	-22.5	-22	-20.5	-21.5	-20	-22.5	-20.5	-20	-21				34.2	1	-0.5	2	1	1.5	0	0.5	0.5	2.5
		34.24	-23.5	-22.5	-19	-22.5	-20	-22.5	-19.5	-21	-22				34.24	0	0	3	0	1	0	0.5	-0.5	1
		34.28	-23.5	-22	-19.5	-22	-20.5	-22.5	-18.5	-21	-22				34.28	-2	0.5	2	0	0	-0.5	1	1	1
		34.32	-23.5	-22	-21.5	-22.5	-21.5	-21.5	-18	-21	-20				34.32	-1.5	1	0.5	0	-1	0	1.5	1	2.5
		34.36	-24	-23	-22.5	-21	-23.5	-20.5	-19.5	-20.5	-21				34.36	-0.5	0	-0.5	1	-1.5	0.5	0.5	1	2
		34.4	-23.5	-23	-23.5	-20	-24.5	-19.5	-20.5	-20.5	-22				34.4	0.5	-1	-1	1.5	-2	2	-0.5	1.5	1.5
		34.44	-23	-23	-23.5	-21.5	-22.5	-18	-21	-20.5	-23				34.44	1	-0.5	-1.5	1	-1	2.5	-0.5	1	1
		34.48	-23	-23.5	-23	-24	-21.5	-19.5	-21	-20	-23				34.48	1	-0.5	0	-1	-0.5	2.5	0.5	1.5	2
		34.52	-23.5	-23.5	-22.5	-24	-22	-21.5	-20.5	-19.5	-21.5				34.52	1	0.5	0	-1	0	2	1.5	2.5	2.5
		34.56	-24	-24.5	-21.5	-24	-22.5	-22.5	-19	-19.5	-20.5				34.56	0.5	0.5	0.5	-0.5	-1	1.5	1.5	2	3
		34.6	-23.5	-23	-21.5	-23.5	-22.5	-23	-18	-20	-20.5				34.6	0	1	0	-0.5	-1	0	2	1	2.5
		34.64	-24	-22	-22	-23	-22	-22	-20	-20	-21				34.64	-0.5	1	-0.5	-0.5	0	1.5	1.5	1	2
		34.68	-23	-22.5	-23.5	-22.5	-22	-22	-22	-20.5	-22.5				34.68	0.5	0	-1.5	0.5	-1	2	0	1.5	1
		34.72	-23	-24.5	-23	-22	-21	-22	-21	-20	-22.5				34.72	1.5	-1	-0.5	0.5	-1	1	-1	1.5	1.5
		34.76	-22.5	-25.5	-22.5	-22.5	-21	-21	-19.5	-21.5	-22.5				34.76	2	-0.5	-1.5	0.5	-1.5	1	0	0	1.5
		34.8	-22.5	-25	-22	-23	-20	-20	-20.5	-22	-22				34.8	0.5	-0.5	-0.5	-0.5	0	2	0.5	-0.5	2
		34.84	-23	-24.5	-21.5	-24	-20.5	-21	-19.5	-21	-22				34.84	0	-1	-0.5	-2	0	1	0.5	0.5	2
		34.88	-21.5	-24.5	-22	-24	-21	-20.5	-19.5	-21	-21.5				34.88	0.5	-2	-1	-1.5	0.5	1	0	0.5	2.5
		34.92	-21	-25	-21	-22.5	-21.5	-20	-19.5	-21	-21.5				34.92	1	-2	0	-0.5	1	1.5	0	1.5	2
		34.96	-21.5	-25	-22	-21.5	-23	-20	-20.5	-21	-21				34.96	1	-2	0	-0.5	-1	1	0	1.5	1.5
		35	-23	-24.5	-23.5	-21	-24	-20.5	-21	-21.5	-22.5				35	0	-2.5	-1	0	-1	1	0	0	0.5
		35.04	-23	-23.5	-23.5	-21	-24	-20	-21.5	-20.5	-22.5				35.04	-1	-1.5	-0.5	0.5	-1.5	2	0	-0.5	1.5
		35.08	-23	-23	-23.5	-21.5	-22.5	-21	-22	-19.5	-21.5				35.08	-1.5	0	-0.5	0.5	-0.5	2	0.5	0	3
		35.12	-23	-23	-23.5	-23.5	-22.5	-21	-20.5	-19.5	-20				35.12	0	0	0	-1.5	0	1	1.5	-0.5	3
		35.16	-23	-22	-23	-24	-22.5	-21.5	-20	-19	-20				35.16	0	1	-0.5	-2	0	0	1.5	0.5	3
		35.2	-23.5	-23	-22	-23.5	-22	-21.5	-19.5	-19.5	-20				35.2	-1	0.5	-0.5	-2	-1	0	1.5	1	2.5
		35.24	-24	-23.5	-22	-22	-21	-21	-19.5	-19	-20.5				35.24	-2	0.5	-1.5	-1.5	-0.5	1	0.5	1.5	2
		35.28	-23	-25	-21.5	-23.5	-20	-20.5	-20.5	-19.5	-20				35.28	-1	-1	-0.5	-2.5	0.5	2	0	0.5	1.5
		35.32	-22.5	-24	-22.5	-24	-20	-20	-20	-20.5	-20.5				35.32	-0.5	-1.5	-1.5	-1.5	2	2.5	1.5	-0.5	1
		35.36	-22.5	-23.5	-21	-23.5	-21	-20	-20	-21.5	-22				35.36	0	-1.5	0	-1.5	2	2.5	1.5	-1	0
		35.4	-22	-23.5	-21.5	-23.5	-20.5	-18.5	-20	-21.5	-23.5				35.4	0.5	-1.5	0.5	-1.5	1.5	2.5	1	-0.5	-0.5
		35.44	-21	-23	-22	-24	-21.5	-18.5	-20	-21	-24				35.44	1.5	0	1	-1	0.5	2.5	0.5	1.5	-0.5
		35.48	-22	-22.5	-23	-24.5	-22.5	-18.5	-20	-20.5	-23				35.48	1.5	-1	-1	-0.5	-0.5	2	0.5	2.5	0
		35.52	-22.5	-24	-23	-24	-23	-18	-20	-20	-21.5				35.52	1.5	-3	-2	0	-1	1.5	0.5	1.5	0.5
		35.56	-23	-23.5	-22.5	-22.5	-22	-20	-21	-20	-21				35.56	0	-1.5	-2	-0.5	-0.5	0.5	0	0	0.5
		35.6	-23	-25	-22.5	-21.5	-22	-21	-21	-20.5	-21				35.6	-0.5	-1.5	-2	0.5	0	1.5	0	-0.5	1.5
		35.64	-23.5	-25.5	-22.5	-22	-22.5	-21	-20	-21	-19.5				35.64	-1	-0.5	-1	0	0.5	2	1	0	4
		35.68	-22.5	-24	-22.5	-22.5	-21.5	-21	-20	-19.5	-19				35.68	0	0.5	-2	0	1	1	0	0.5	3.5
		35.72	-22.5	-22.5	-23.5	-21.5	-20.5	-20	-22	-19	-20				35.72	0.5	0.5	-2.5	0.5	1.5	2.5	-1	1.5	1.5
		35.76	-22.5	-23.5	-24	-21.5	-19.5	-19.5	-22	-19.5	-21				35.76	0	-1	-1	0	2.5	2	-1	1	0.5
		35.8	-21.5	-23.5	-24	-23	-20.5	-19.5	-22	-19	-21				35.8	0	-1.5	-0.5	-2	2	0.5	-1	1	0.5
		35.84	-22.5	-23.5	-23.5	-23	-21	-20.5	-21.5	-18.5	-21				35.84	-0.5	-2.5	-1	-2	1	0.5	-1.5	1	0.5
		35.88	-23	-24.5	-23	-24	-20.5	-22	-21	-18	-21.5				35.88	0	-2.5	-1.5	-1	1	0.5	-1	0.5	0.5
		35.92	-24	-25	-22.5	-24	-21.5	-22.5	-19.5	-18	-20.5				35.92	0.5	-2	-1	-1	-0.5	0.5	0.5	-0.5	1
		35.96	-24.5	-24	-21.5	-24	-22.5	-19.5	-20	-19.5	-20.5				35.96	-1.5	-1.5	-1	-1	-0.5	0.5	0.5	-0.5	0.5
		36	-24	-23.5	-23	-23.5	-22.5	-19	-21	-20	-20.5				36	-1.5	-1	-1	0	-0.5	0.5	0	0.5	0
		36.04	-22.5	-23	-24	-22.5	-22	-19.5	-20	-21	-20.5				36.04	-0.5	0	-0.5	-0.5	-0.5	2	1	1	1
		36.08	-23	-22	-23.5	-21	-22.5	-20	-18	-20.5	-20.5				36.08	0	0	1	-0.5	-0.5	2	1.5	1	1.5
		36.12	-23.5	-23	-23	-21	-22.5	-19.5	-18	-21.5	-20.5				36.12	0.5	-0.5	-0.5	-1	-1	1.5	2	0.5	2
		36.16	-23.5	-23	-21.5	-22.5	-22	-19.5	-18.5	-21.5	-20				36.16	0.5	-0.5	-0.5	-2.5	-0.5	2.5	1	0	2
		36.2	-24	-23	-21.5	-24.5	-22	-21	-19.5	-20.5	-21				36.2	-1.5	-0.5	0	-2.5	-0.5	2	-0.5	-1	1
		36.24	-23	-23.5	-22.5	-25	-21	-22	-19	-20	-21				36.24	-1	-1	-1	-0.5	0.5	0.5	0.5	-1	0
		36.28	-23.5	-24.5	-23.5	-23.5	-21	-21	-19	-19.5	-21				36.28	-2	-1	-2	-0.5	1.5	0.5	1	0.5	0.5
		36.32	-25	-25	-23	-23	-21	-22	-20	-18	-21.5				36.32	-2	-2.5	-1.5	-1.5	0.5	0	1	2	1.5
		36.36	-24.5	-24	-22	-24	-20	-22	-20	-18	-20.5				36.36	-1.5	-1.5	-1	-2.5	0	0.5	0.5	0	3
		36.4	-24	-23.5	-23	-25	-19.5	-20.5	-19.5	-18	-20.5				36.4	0	-1	-1.5	-3.5	0.5	2	0.5	-1	3
		36.44	-24	-24	-24	-24	-21	-20.5	-20	-18.5	-20				36.44	1	-1	-2	-1.5	0	2	0	-0.5	2.5
		36.48	-23.5	-24.5	-23.5	-22	-22	-20	-20	-18	-20.5				36.48	1.5	-2.5	-1	-0.5	0.5	1	0	1.5	3
		36.52	-25	-25	-22.5	-20.5	-21.5	-20	-20	-18.5	-20.5				36.52	0	-3	-0.5	0	0	0	0	1.5	2.5
		36.56	-24.5	-25.5	-21.5	-21	-21	-20.5	-19.5	-20	-20.5				36.56	-0.5	-3	1	-0.5	-1	-0.5	0.5	0.5	2.5
		36.6	-23.5	-24	-22	-23	-21.5	-22	-18	-20	-20				36.6	-0.5	-2	-0.5	-1.5	-1.5	-0.5	1.5	0.5	2
		36.64	-22.5	-23.5	-23	-23.5	-21	-21.5	-18.5	-20.5	-19.5				36.64	0.5	-1	0	-2	-1	1	1.5	1.5	2
		36.68	-23	-23	-22.5	-23	-21	-19.5	-21	-20.5	-20.5				36.68	0.5	-1	-0.5	-2	-0.5	2.5	1	1	2
		36.72	-23	-24	-22.5	-22.5	-22	-18.5	-22	-20.5	-21				36.72	1.5	-1.5	-1	-1.5	-2	1.5	0.5	0	1
		36.76	-24	-24.5	-22	-23	-21.5	-18.5	-21.5	-19.5	-22				36.76	1.5	-1.5	-1.5	-1	-2.5	1.5	1	-1.5	0
		36.8	-24.5	-22.5	-23	-24.5	-21.5	-20	-21	-18	-21.5				36.8	1.5	0	-1	-1.5	-2	1.5	1	-1.5	0.5
		36.84	-25.5	-21.5	-23	-23.5	-20	-21.5	-20.5	-18.5	-22				36.84	-0.5	0	-1	-0.5	0	2.5	1	0	0.5
		36.88	-25.5	-22	-24	-22.5	-21	-21.5	-20.5	-19	-21				36.88	-1.5	0.5	-1	0	0	3	0.5	1	1
		36.92	-24.5	-22.5	-23	-22	-21.5	-21	-21	-19.5	-20.5				36.92	-2	0.5	-1	-0.5	-0.5	2.5	-1	0.5	0.5
		36.96	-23	-22.5	-22.5	-22	-22	-21.5	-20	-20.5	-20				36.96	-0.5	0.5	-2	-1.5	1	1.5	-1	0	1.5
		37	-23	-23	-23	-23.5	-22	-22.5	-20	-20.5	-19.5				37	-1	0.5	-2.5	-1.5	1	0.5	0	0.5	2
		37.04	-24	-25	-23.5	-24	-22	-22	-20.5	-19.5	-20.5				37.04	-1.5	0	-1.5	-1.5	-0.5	-0.5	0	1	3
		37.08	-23.5	-26	-24.5	-22.5	-22	-20	-21	-19.5	-21				37.08	-1.5	-2	-1	-0.5	-1	0.5	0.5	0.5	2.5
		37.12	-22.5	-26	-24.5	-21.5	-22	-19.5	-20.5	-19.5	-20				37.12	0	-3	0	-0.5	-0.5	1	0	0	2.5
		37.16	-22	-25.5	-23.5	-21.5	-22.5	-20	-20	-19.5	-19.5				37.16	1	-2	0	-1.5	0	0.5	0	1.5	1.5
		37.2	-21.5	-24	-22	-23	-23	-21	-20.5	-21	-20.5				37.2	0.5	-0.5	1	-1	0	-1	-0.5	2	1.5
		37.24	-22	-24	-22.5	-23.5	-22.5	-21	-21	-20.5	-21				37.24	-0.5	-1.5	0	-1	0	-1	-1	2	2
		37.28	-23	-23.5	-23.5	-24	-22	-20.5	-20	-21	-20.5				37.28	-1.5	-1.5	-0.5	0	-0.5	0	0	1	2
		37.32	-24	-24	-24	-23	-22.5	-19.5	-20	-21.5	-20				37.32	-1	-1.5	-1	0.5	-0.5	0.5	0	0.5	1.5
		37.36	-24.5	-23	-24	-22	-22.5	-19	-19	-21	-20				37.36	0	-1	-0.5	0.5	-0.5	1	1	0.5	2
		37.4	-24.5	-23.5	-23.5	-20.5	-22.5	-19.5	-19	-20.5	-21				37.4	1.5	-1.5	-1.5	1	0	0	1	2	2
		37.44	-24	-24.5	-23	-22	-22	-19.5	-18.5	-20	-21.5				37.44	1.5	-2	-0.5	-0.5	0	-0.5	1.5	2	1
		37.48	-23.5	-24.5	-23.5	-23.5	-20.5	-19	-20	-20.5	-21.5				37.48	1	-0.5	0	-0.5	1	0	1.5	1	0.5
		37.52	-23.5	-23.5	-23	-24	-20.5	-19	-20.5	-21	-19.5				37.52	0	-0.5	0	0	1	0	1	0.5	2.5
		37.56	-23	-23	-22.5	-23.5	-22.5	-19.5	-20.5	-20	-20				37.56	-0.5	-0.5	-1.5	-1	-2	0	0	1	2.5
		37.6	-23	-22.5	-22	-24	-23	-19.5	-21	-19.5	-21.5				37.6	-1	1	-1.5	-2	-3	0.5	-1	1	1.5
		37.64	-24	-23	-22.5	-23.5	-21	-20	-20.5	-17	-22				37.64	-1.5	1	-0.5	-1.5	-1	1	0.5	2.5	1.5
		37.68	-24.5	-22.5	-22	-23	-20	-19	-20	-17	-22.5				37.68	-2	1	0.5	-1.5	0.5	2	0.5	2	1
		37.72	-24.5	-23.5	-22	-22.5	-21	-18.5	-20.5	-19	-23				37.72	-3	-0.5	0	-1	-1	2	0	0.5	-0.5
		37.76	-23	-23	-23	-23	-23	-19	-19	-20	-21				37.76	-2.5	-1.5	-1	-1.5	-1.5	1	1	0	1
		37.8	-22.5	-23	-24	-21.5	-22.5	-20.5	-19.5	-20	-21				37.8	-1	-0.5	-2	0	0	-1	-0.5	1.5	1.5
		37.84	-22.5	-23	-23.5	-22	-22	-21.5	-19.5	-19.5	-21.5				37.84	0.5	-0.5	-2.5	0.5	0	-2	-0.5	2	1.5
		37.88	-23.5	-23	-24	-24	-22	-21.5	-19.5	-19.5	-20				37.88	0.5	0	-2.5	0	-0.5	-2	0.5	1	3.5
		37.92	-24.5	-23.5	-23.5	-24.5	-22.5	-22	-19	-20	-19.5				37.92	-0.5	0	-1.5	-1	-0.5	-2	1	0.5	4.5
		37.96	-22.5	-23.5	-23	-24.5	-23	-22	-20	-20	-20				37.96	0	0	-1	-1	-1.5	-1.5	1	0	4
		38	-22	-22.5	-23	-24	-22	-20.5	-20.5	-20	-21				38	0.5	0	-1	-1.5	-1	-0.5	0	0.5	3.5
		38.04	-23	-23	-23	-23.5	-21	-19	-20	-20.5	-19.5				38.04	0	0	-1	-1	0	1	-0.5	1	2.5
		38.08	-23	-24	-23	-23	-22	-18	-20	-20	-19.5				38.08	1.5	-1	-1	-0.5	-1	1.5	0	1.5	1
		38.12	-23.5	-24.5	-23.5	-23.5	-22	-19	-19	-19.5	-19.5				38.12	0.5	-1.5	-0.5	0	-1	1.5	1	2	1
		38.16	-23.5	-22	-23.5	-23.5	-21	-19.5	-19	-20	-20.5				38.16	-1.5	0	0	0.5	0	2	0.5	2	1
		38.2	-24	-22	-24	-24	-21	-20	-20	-20.5	-21				38.2	-1.5	0.5	-1	-0.5	0	1.5	0	0.5	2
		38.24	-23.5	-22	-24.5	-24	-21.5	-21	-20.5	-20	-21				38.24	-1	0.5	-2.5	-1	0	-0.5	0	0.5	3
		38.28	-23	-23.5	-23	-23.5	-22	-20.5	-22	-19.5	-21.5				38.28	-1.5	-1	-2	-1	-0.5	-1.5	-1	1.5	1.5
		38.32	-23	-23.5	-22	-23	-21.5	-20.5	-22.5	-19	-20.5				38.32	-1	-1.5	-1.5	-2	-1	-2.5	-1	1.5	2
		38.36	-22.5	-23	-21	-23	-20.5	-19.5	-22	-18.5	-20				38.36	0	-1	-0.5	-1.5	-1	-0.5	-1	1	2
		38.4	-21.5	-24	-21	-24	-20.5	-18.5	-22	-18.5	-20				38.4	0.5	-0.5	0	-1	-1.5	0.5	0	1.5	2.5
		38.44	-22	-24	-20.5	-23	-21.5	-20	-21.5	-19	-20.5				38.44	0	0	0.5	0	-2	1	0	-0.5	2
		38.48	-23	-23	-21.5	-22	-22.5	-22	-21	-19.5	-23				38.48	-1	0	1	-0.5	-2	0.5	-0.5	-0.5	0.5
		38.52	-22	-23.5	-23.5	-22.5	-21	-22.5	-21.5	-19.5	-22.5				38.52	0	0	-0.5	-0.5	-1	0.5	-1.5	0.5	2
		38.56	-21.5	-24	-23.5	-22	-21.5	-21	-22	-20	-22				38.56	0	-1.5	-0.5	0.5	-1	0.5	-1.5	0	2.5
		38.6	-22	-23.5	-23.5	-23	-21.5	-19.5	-21	-21.5	-22				38.6	0	-2	-1.5	-0.5	0	1.5	-1	-0.5	1.5
		38.64	-23	-23.5	-22.5	-24	-21.5	-19.5	-21.5	-23.5	-21.5				38.64	-0.5	-2	-1.5	-1	0.5	2	-0.5	-1	2
		38.68	-23	-24.5	-22	-24.5	-22.5	-21	-22	-22	-21				38.68	-1	-2	-2	-1	-1	1.5	-1	-0.5	3
		38.72	-23	-24	-22	-23	-23	-21.5	-22.5	-20.5	-21.5				38.72	0	-2	-0.5	-0.5	-1.5	1	-2	1	3.5
		38.76	-23.5	-23.5	-23	-23	-23	-21	-22	-19	-21				38.76	-0.5	-1.5	-1.5	-0.5	-2	1.5	-1	2.5	3
		38.8	-23	-24	-22.5	-22.5	-22.5	-19.5	-21.5	-19.5	-21.5				38.8	-1	-1	-0.5	0.5	-2	2.5	0.5	2.5	2.5
		38.84	-23	-23	-23	-22	-22	-19	-20	-21	-21.5				38.84	-1	-1	0	1	-1.5	3	1	1.5	2
		38.88	-23.5	-22.5	-23	-23.5	-22.5	-18.5	-19.5	-21.5	-23				38.88	-1	-0.5	0	-0.5	-1	2.5	0.5	2	1
		38.92	-23.5	-23	-23	-25	-22	-18.5	-20.5	-22	-23				38.92	-1.5	-1	0	-2	0	2	-0.5	0.5	0.5
		38.96	-22.5	-23	-22	-24.5	-22	-19.5	-21.5	-21.5	-21.5				38.96	-1	-1	0.5	-2.5	0.5	0.5	-1.5	0	1.5
		39	-23	-22.5	-22.5	-22.5	-22	-20.5	-21.5	-20.5	-20.5				39	-2.5	-1	-0.5	-0.5	0	0.5	-1	-0.5	2
		39.04	-24	-22.5	-23	-21	-20.5	-21	-20.5	-20	-20.5				39.04	-3.5	-1	0	0	0	0	0.5	0	1.5
		39.08	-23	-23.5	-22.5	-21.5	-21.5	-21	-20	-20.5	-21.5				39.08	-2	-1.5	0	-0.5	-1.5	-1	0	0.5	1.5
		39.12	-22.5	-24	-23.5	-22.5	-22.5	-20	-20	-21.5	-21.5				39.12	-0.5	-1.5	0	-1.5	-2	-0.5	0	0.5	0.5
		39.16	-24	-25	-24.5	-24	-21.5	-19	-21	-21.5	-20				39.16	-1.5	-1	-1.5	-2	-0.5	0.5	0	1	0.5
		39.2	-25	-25.5	-24.5	-24	-22	-20	-22	-21	-20.5				39.2	-2	-1.5	-2	-1	-0.5	0.5	-1	1.5	1
		39.24	-23.5	-25	-24	-22.5	-22.5	-20.5	-20.5	-21	-20.5				39.24	-1	-3	-2.5	-0.5	-0.5	0.5	-0.5	0.5	1
		39.28	-23	-23.5	-23.5	-22	-22.5	-19.5	-20	-20	-21.5				39.28	-0.5	-2.5	-1	0	-0.5	1.5	1	1.5	1
		39.32	-22	-23	-23	-22.5	-22.5	-20	-20.5	-20	-21.5				39.32	1	-1	0	-0.5	-1.5	1	1	1	1
		39.36	-22.5	-23.5	-23.5	-22.5	-22.5	-20	-21	-19.5	-21.5				39.36	1	-0.5	-1	-1.5	-1.5	0.5	0.5	1.5	2
		39.4	-23.5	-23.5	-24	-23.5	-22.5	-19.5	-20.5	-19.5	-22				39.4	0	-1.5	-2.5	-1.5	-1	1	0	1	1.5
		39.44	-24.5	-22.5	-24	-23	-22	-20	-22	-20	-22				39.44	-1.5	-0.5	-2.5	-1	1.5	0	-2	1.5	0.5
		39.48	-24	-22	-23	-22	-21.5	-20.5	-21.5	-20	-21				39.48	-1	0.5	-1	-0.5	1.5	1	-1.5	1	1.5
		39.52	-23	-22.5	-22.5	-22.5	-22.5	-21	-22	-20.5	-21				39.52	0.5	-0.5	-0.5	0.5	0	1	-1	0.5	1.5
		39.56	-21.5	-23	-23	-22.5	-22.5	-21	-22.5	-21.5	-21				39.56	1	-1	-1	1.5	-1	1.5	-0.5	-0.5	1.5
		39.6	-23	-21.5	-22.5	-22.5	-21.5	-21	-21.5	-21.5	-20				39.6	-0.5	-0.5	-1.5	1	0	0.5	-0.5	0	2.5
		39.64	-24	-21.5	-21.5	-22.5	-22	-21.5	-20.5	-19.5	-18.5				39.64	-1	0.5	-0.5	0	-1	-0.5	-0.5	1	3.5
		39.68	-24	-22	-22.5	-23	-22.5	-22.5	-21	-19	-19.5				39.68	-2	0.5	-0.5	-1	-1	-1.5	-0.5	0.5	2.5
		39.72	-23	-23	-22.5	-23.5	-22	-22.5	-22	-19.5	-21				39.72	-1	0.5	0	-2	-2	-1	0	0.5	1.5
		39.76	-23	-24	-22	-24.5	-21	-21.5	-22	-20	-20				39.76	-1	0	1.5	-2	-2	0	0	1.5	2
		39.8	-22	-24	-22	-24.5	-20	-21	-21	-19.5	-19				39.8	0	-0.5	-0.5	-0.5	0	1	0.5	3	3
		39.84	-22	-24.5	-22	-24	-21.5	-19.5	-21.5	-19.5	-19.5				39.84	0	-1	-0.5	0	1	2	0	1.5	1.5
		39.88	-22	-23.5	-21.5	-25	-22.5	-19.5	-21	-21	-20				39.88	-1	-0.5	0	-1	1	2	0	1	2.5
		39.92	-21.5	-22	-21.5	-24.5	-22	-19	-20	-21.5	-19				39.92	-1.5	-0.5	-0.5	-1	0.5	1.5	1	2	3
		39.96	-22.5	-21.5	-21	-23	-21	-19.5	-20.5	-21	-19				39.96	-1	-1.5	-0.5	0.5	0.5	0.5	1	2	3.5
		40	-23.5	-22	-20.5	-23	-21.5	-20	-21	-21	-19				40	-0.5	-2	0.5	0.5	-0.5	0.5	0	1.5	1.5
		40.04	-23.5	-22.5	-22	-23	-23	-20.5	-20.5	-21.5	-20				40.04	0	-1	-1	0	-1.5	1	-0.5	1	0.5
		40.08	-22.5	-22.5	-24	-23.5	-24	-21	-22	-21	-21.5				40.08	-1	-0.5	-3	-1	-1.5	1	-0.5	1	1.5
		40.12	-21.5	-23.5	-24	-24	-23	-20	-22	-20	-20				40.12	-1	-0.5	-2.5	-1	0	2	0	1.5	3
		40.16	-22	-23.5	-24	-24	-22	-19	-20.5	-20.5	-19				40.16	-0.5	-0.5	-1.5	-1.5	-0.5	3	1	0	3
		40.2	-24	-23.5	-23	-24.5	-21.5	-19.5	-20	-19.5	-19				40.2	0	-1.5	-1	-2.5	-1.5	1	0.5	1	3.5
		40.24	-24	-23.5	-23	-25.5	-23.5	-19.5	-21	-20	-19				40.24	0	-1	-0.5	-2.5	-4	0	0	1.5	4
		40.28	-24	-23.5	-22	-24	-22	-19	-21.5	-21	-19				40.28	-0.5	-0.5	0.5	-1.5	-2	-0.5	0	1	3
		40.32	-24.5	-23	-20	-22	-21	-18.5	-20.5	-21.5	-19.5				40.32	0	0	2	-0.5	0	0	-0.5	1	2
		40.36	-23.5	-22.5	-20.5	-23	-19.5	-20	-20.5	-20.5	-20.5				40.36	-0.5	0	-0.5	-1.5	1	1	-0.5	1	2
		40.4	-23	-22.5	-22	-23.5	-19	-21.5	-19.5	-21	-20.5				40.4	-1	0	-2	-0.5	1	-0.5	-0.5	0	2
		40.44	-21.5	-22.5	-22.5	-23.5	-20	-21	-20	-22	-20.5				40.44	0	0.5	-2.5	-1	0	-0.5	0	-0.5	2
		40.48	-22.5	-23	-22.5	-23.5	-20.5	-20	-21.5	-21	-20.5				40.48	0.5	0.5	-1.5	-1.5	-0.5	-0.5	0	1	0.5
		40.52	-23.5	-23.5	-23	-24.5	-22	-18.5	-22.5	-21	-20.5				40.52	1	0	-1	-2.5	-1.5	0	0	1	0.5
		40.56	-23.5	-23	-23	-24.5	-22	-19	-22	-20.5	-22				40.56	0	0	-0.5	-3	-1	0	0	1	1.5
		40.6	-24	-23.5	-23	-24.5	-23	-18.5	-20.5	-20	-22.5				40.6	-0.5	0	-2	-2	-1	-0.5	0	1.5	1.5
		40.64	-25	-22.5	-23	-25	-23	-19	-20.5	-20	-23				40.64	-1	0.5	-2	-1.5	-1.5	0.5	0	1.5	1.5
		40.68	-25	-22.5	-23	-25.5	-20.5	-20	-20.5	-20	-22.5				40.68	-1	0	-3	-2	-0.5	1.5	0.5	0	2
		40.72	-24	-24	-22	-25	-20	-20.5	-20.5	-20	-22.5				40.72	-1.5	-1	-1.5	-1.5	0	1.5	1	0.5	1.5
		40.76	-25	-25.5	-20.5	-23.5	-19.5	-20	-21	-19.5	-21.5				40.76	-1.5	-1.5	0	-0.5	0	0.5	0	1	1
		40.8	-25.5	-26	-20	-23	-19.5	-19	-21.5	-20	-20				40.8	-1.5	-1.5	0.5	1	1.5	1.5	0	0.5	1
		40.84	-25.5	-24	-21.5	-22	-20.5	-18.5	-20	-20.5	-20				40.84	-2.5	-1	-0.5	2.5	1	2	2	0.5	1.5
		40.88	-23.5	-23.5	-22	-22	-21.5	-19.5	-20	-21	-19.5				40.88	-1.5	-1	-1	1	-1	1	2.5	0	2.5
		40.92	-23	-23	-22.5	-22.5	-22.5	-19	-21	-20	-20				40.92	-1	0	-1.5	0	-1.5	1	2	-0.5	2.5
		40.96	-23.5	-23	-22.5	-24.5	-23.5	-18	-21	-20	-21.5				40.96	-1	-0.5	-0.5	-0.5	-1	2	1.5	-0.5	0.5
		41	-25	-23.5	-21	-24	-23.5	-18	-21.5	-21	-21.5				41	-1.5	-0.5	1	0	-0.5	2	1	-1	-0.5
		41.04	-25.5	-24	-21	-23.5	-23	-19.5	-21.5	-21	-22				41.04	-1.5	0	0.5	0	0.5	0.5	0.5	0	0.5
		41.08	-26	-24.5	-22	-24	-22.5	-20.5	-20.5	-21	-22.5				41.08	-1	0	1	-0.5	-0.5	-0.5	1	1	0.5
		41.12	-24.5	-24.5	-22	-23	-22	-20	-21	-22	-22.5				41.12	0.5	-1.5	1	-1	-1	0	0	1	0.5
		41.16	-23	-24	-22	-24	-23	-20	-22	-21.5	-21				41.16	1	-1	-0.5	-1.5	-2	0.5	-0.5	1	2
		41.2	-23	-23.5	-22.5	-25.5	-23	-19.5	-21	-20.5	-20				41.2	0.5	-0.5	-1	-2	-3	1.5	0.5	1	3
		41.24	-22.5	-23	-23.5	-25	-23	-20.5	-21.5	-20	-20				41.24	0.5	-0.5	-1.5	-1.5	-2.5	1	1	1.5	2.5
		41.28	-22	-23.5	-24	-23.5	-22	-20.5	-21	-20.5	-19.5				41.28	0	-1	-1	-1	-1.5	0.5	1	1	2.5
		41.32	-22.5	-24	-24	-22.5	-22	-21	-21	-21	-19				41.32	-1	-1.5	-2	-0.5	-1.5	-0.5	-0.5	0.5	3
		41.36	-22.5	-24	-23	-23.5	-22.5	-20.5	-20.5	-21	-18				41.36	0	-2	-1.5	0	-1.5	0	-1	0	4
		41.4	-23	-23.5	-22.5	-24	-23	-20	-20.5	-20.5	-19				41.4	0.5	-1.5	-1	-1	-2	2	0	0.5	3.5
		41.44	-23	-23	-22.5	-24.5	-22.5	-20	-19.5	-19.5	-20				41.44	1.5	-1	-1	-1.5	-1.5	2.5	0.5	1	2
		41.48	-22.5	-23	-22.5	-23.5	-21.5	-21	-20	-18.5	-21.5				41.48	1.5	-1.5	-1	-1.5	-1.5	1.5	0	1.5	2
		41.52	-23	-24	-21.5	-22.5	-22.5	-20	-21	-20	-21				41.52	0.5	-1.5	0	0	-1	1.5	-1	0	2.5
		41.56	-24	-24.5	-22.5	-22	-23.5	-20	-22.5	-20.5	-21				41.56	-0.5	-1.5	-0.5	0.5	-0.5	1	-1	0	2
		41.6	-23	-24	-21.5	-22.5	-22.5	-19	-21.5	-21.5	-20.5				41.6	-1	-1	0.5	0.5	0	1	0.5	0.5	1
		41.64	-23	-24	-20.5	-23.5	-22	-18	-20	-22.5	-20				41.64	-2	-2	0.5	-1	0	2	1.5	0	1
		41.68	-22.5	-23.5	-22	-23	-22	-17.5	-18.5	-22.5	-19.5				41.68	-1.5	-2	0.5	-1.5	-1	2	1.5	0	2
		41.72	-24.5	-24	-22.5	-22.5	-23	-17.5	-18.5	-22	-20				41.72	-2.5	-0.5	0	-1.5	-1	2.5	1	0	1.5
		41.76	-24	-24	-22.5	-22.5	-23.5	-17.5	-20.5	-20	-20.5				41.76	-1.5	-1.5	-0.5	0	-0.5	2.5	0.5	0.5	1.5
		41.8	-24.5	-24.5	-22.5	-22.5	-22.5	-20	-19.5	-20	-20.5				41.8	-1	-2.5	-0.5	1	0	0.5	1	1	2
		41.84	-23	-23.5	-21.5	-23.5	-22	-22	-20	-19	-20.5				41.84	1	-1.5	-0.5	0	-0.5	0	1	2	2.5
		41.88	-23.5	-24.5	-23	-24.5	-22	-22.5	-20.5	-19	-22				41.88	0.5	-1	-1.5	-1.5	-1	0	1	2	2.5
		41.92	-24.5	-25.5	-22	-24	-22.5	-22	-21	-19.5	-22				41.92	0.5	-0.5	-1	-2	-0.5	0.5	1	1.5	2.5
		41.96	-23.5	-24.5	-21.5	-23.5	-22	-21.5	-22	-20	-22				41.96	0	-1	-1.5	-1	0	0.5	0.5	0.5	2.5
		42	-22	-24	-23	-22.5	-21.5	-20.5	-21	-20	-21				42	-1	-1.5	-2	0	0	0.5	0	0	2.5
		42.04	-22.5	-23.5	-24	-21.5	-21.5	-19.5	-21.5	-20	-20				42.04	-1.5	-0.5	-3	1	0.5	1	-1	0	1.5
		42.08	-23.5	-24.5	-23	-21	-21.5	-19.5	-22	-20.5	-21				42.08	-2	-1	-2	1	0.5	0.5	-1	0.5	1.5
		42.12	-24	-24.5	-21.5	-22	-20.5	-19.5	-21.5	-21.5	-21				42.12	-1.5	-2	-1.5	-1	0	1	-0.5	-0.5	3
		42.16	-24	-24	-21	-22.5	-21	-20	-21	-22.5	-21.5				42.16	-1	-1.5	0	-1.5	0	1.5	-0.5	0.5	3
		42.2	-24.5	-23.5	-23	-22.5	-22	-20	-20.5	-22.5	-21				42.2	-1.5	-1	-1.5	-0.5	-0.5	2.5	0.5	-0.5	3.5
		42.24	-24.5	-22.5	-25	-21.5	-23	-20.5	-20.5	-22	-21				42.24	-0.5	-0.5	-0.5	1	-1	1	0.5	-0.5	3
		42.28	-24	-23	-25.5	-22.5	-22.5	-21.5	-22	-21.5	-21.5				42.28	1	-1.5	0	1	-0.5	0.5	-0.5	0.5	1.5
		42.32	-23.5	-23	-24	-24	-23	-19.5	-22	-20.5	-21				42.32	1.5	-2.5	0.5	0	-1.5	2	-0.5	1.5	1.5
		42.36	-23	-23.5	-22	-23.5	-22	-18.5	-21	-20	-20				42.36	1	-2.5	0	-0.5	-1	2.5	0	2	2.5
		42.4	-22.5	-24	-21	-23.5	-22	-19	-18.5	-19.5	-19.5				42.4	1	-2.5	1	-1	0	1.5	1.5	2	2
		42.44	-23	-24	-21.5	-23.5	-23.5	-20	-19	-18.5	-20				42.44	-0.5	-1.5	0.5	-1.5	-1	0	1.5	1.5	2.5
		42.48	-24	-24.5	-22	-22.5	-24	-21.5	-19.5	-17.5	-21				42.48	-1.5	-1.5	-0.5	-0.5	-2.5	0	1	2	2.5
		42.52	-24.5	-24	-21.5	-22.5	-23	-22	-20.5	-18.5	-21.5				42.52	-1	-0.5	-1	0	-2.5	0.5	0	1.5	1.5
		42.56	-25	-24.5	-20.5	-22.5	-22	-21.5	-21	-21.5	-21.5				42.56	-0.5	-0.5	0	0	-1.5	1	0	-2	1.5
		42.6	-24.5	-24	-20	-22.5	-22.5	-20	-21	-22	-22.5				42.6	0	-0.5	0	-0.5	-2	1.5	-0.5	-2.5	0.5
		42.64	-24	-23	-19.5	-22.5	-23	-19.5	-21	-21.5	-22.5				42.64	0	-1	0	0	-1	1	-1	-1	1
		42.68	-24	-23	-21.5	-23.5	-24	-19.5	-21	-20.5	-22.5				42.68	-0.5	-1.5	-0.5	0	-0.5	1	-0.5	0.5	1.5
		42.72	-24	-22.5	-22.5	-24.5	-23	-19	-19	-19	-21				42.72	-1	-1	-0.5	0	0	1	0.5	0.5	2
		42.76	-23	-23.5	-22.5	-24	-24.5	-20	-19	-18.5	-21				42.76	-0.5	-1	-1	-0.5	-0.5	1.5	0	1	1.5
		42.8	-22	-24	-22.5	-22.5	-23.5	-21	-20.5	-19	-20.5				42.8	0	-1	-1.5	0	0.5	1.5	0	2	2
		42.84	-21.5	-24	-23.5	-23	-23	-21.5	-21	-20	-21				42.84	-0.5	-1.5	-2.5	-1	0.5	1	-0.5	2.5	1.5
		42.88	-22.5	-24	-23.5	-22.5	-22.5	-21.5	-21	-22	-20.5				42.88	-1.5	-1.5	-2.5	-1	0	1	-0.5	1	2.5
		42.92	-21.5	-23.5	-23	-22	-23	-22.5	-20	-22	-21				42.92	-0.5	-0.5	-1	-1	-0.5	-0.5	0	0	2
		42.96	-22	-24	-23	-21.5	-23.5	-23	-19.5	-21	-23				42.96	0.5	0	0	0.5	-1.5	-1	0	-0.5	1
		43	-23	-23.5	-23	-21.5	-23	-22.5	-19.5	-22	-23				43	0	-1	0.5	0.5	-1.5	-0.5	0	-1	1
		43.04	-24	-24	-23.5	-21.5	-23	-21	-20	-21.5	-20.5				43.04	-0.5	-1	-0.5	-0.5	-1	0.5	0.5	0	2
		43.08	-24	-23	-24.5	-22.5	-24	-20.5	-20	-21	-19.5				43.08	0	-0.5	-1.5	-1	-2	1	0.5	0	1.5
		43.12	-23.5	-23	-25	-24	-24	-20.5	-20	-21	-20				43.12	1.5	0	-2	-1	-2	1	1	0.5	2
		43.16	-22.5	-23	-24.5	-23.5	-24	-21	-20.5	-21	-20.5				43.16	2	0	-2.5	-1	-2	1.5	0.5	0.5	3
		43.2	-23	-23.5	-23.5	-23.5	-24	-21.5	-22	-20.5	-21				43.2	2	-0.5	-2	-1.5	-1.5	1	0.5	1	2.5
		43.24	-23.5	-23.5	-23.5	-22.5	-24	-21.5	-23	-20	-22				43.24	1.5	-0.5	-1	-1	-1.5	-0.5	-0.5	2	2
		43.28	-24	-22	-23.5	-22.5	-22.5	-21.5	-22	-21.5	-21				43.28	-0.5	0.5	0.5	-1	-0.5	0	-0.5	1.5	2.5
		43.32	-24	-22.5	-23	-24	-22	-21.5	-21	-21.5	-21.5				43.32	0	0.5	1.5	-1	-1	0	0.5	0.5	2
		43.36	-23	-25	-23.5	-24	-22	-20.5	-21.5	-20.5	-21				43.36	1.5	-1	0	-1.5	-0.5	1	-1	0.5	1
		43.4	-22.5	-25.5	-23	-23.5	-23	-20.5	-22	-20	-21.5				43.4	1	-1.5	-1	-1	-1	0.5	-1	0.5	0.5
		43.44	-23.5	-25.5	-23.5	-23	-23.5	-20.5	-20	-19	-21				43.44	-0.5	-1	-1.5	0	-1.5	0	2	2	1
		43.48	-24	-26	-24	-22.5	-23	-20.5	-19.5	-19	-21.5				43.48	0	-1	-2	1.5	-1.5	0.5	1.5	2	0.5
		43.52	-23	-25.5	-24.5	-23	-22.5	-22	-20.5	-20	-22				43.52	1	-1	-2.5	1	-0.5	1.5	0.5	1.5	1
		43.56	-22	-23	-25.5	-22.5	-22	-22	-22	-19.5	-22				43.56	3	1	-3	1	-0.5	1	-0.5	1.5	1.5
		43.6	-22.5	-21.5	-25	-22.5	-21	-21.5	-23	-19	-21.5				43.6	2	0.5	-2.5	0	0.5	0.5	-1.5	0	2
		43.64	-23	-22	-23	-23	-21.5	-20.5	-23.5	-18.5	-21				43.64	1	-0.5	-0.5	-1	1	-0.5	-2	1.5	2
		43.68	-23	-21.5	-21.5	-22.5	-22	-19.5	-22.5	-20	-20.5				43.68	0	-0.5	0.5	-0.5	0.5	0.5	-2	2	2.5
		43.72	-22.5	-21.5	-22	-23	-22.5	-19.5	-20.5	-20.5	-21.5				43.72	0	0	1	-1	-1	1.5	-1	2	2
		43.76	-24	-23	-22	-23.5	-22.5	-20.5	-19.5	-21.5	-21				43.76	0	-1	0	-0.5	-1	2	0	0.5	2.5
		43.8	-25	-24	-22.5	-24	-22.5	-22	-20	-21	-21				43.8	-0.5	-0.5	0	-1	-0.5	0	-0.5	0	3
		43.84	-24.5	-24.5	-23	-24	-22.5	-22.5	-20.5	-20	-22.5				43.84	-0.5	0	-0.5	-1.5	-1	-0.5	-0.5	0.5	1.5
		43.88	-23.5	-25.5	-22.5	-24.5	-21.5	-22.5	-20	-18.5	-23				43.88	0	-1	-0.5	-1	-1	-0.5	1.5	2.5	1
		43.92	-24	-25	-22	-23	-21	-20.5	-20.5	-17.5	-22.5				43.92	0	-0.5	-1	0	-1	0	1.5	2.5	0
		43.96	-22.5	-25	-22	-21.5	-22	-18.5	-20.5	-18.5	-23				43.96	0	-1.5	-0.5	0.5	-1	1.5	0.5	1.5	-0.5
		44	-21.5	-24	-21.5	-22.5	-23	-19.5	-20.5	-20	-23				44	0.5	-1.5	-0.5	-0.5	-1.5	1.5	0	-0.5	1
		44.04	-22.5	-23	-21.5	-23	-22	-20.5	-21.5	-20.5	-22.5				44.04	0	0	0	-0.5	-2	1.5	-1	-1	2
		44.08	-23	-22	-22.5	-23.5	-21	-21.5	-22	-19	-22				44.08	0.5	1	-0.5	0.5	-0.5	1.5	-1	1	2.5
		44.12	-23	-22	-24.5	-23.5	-21.5	-21.5	-21	-18	-22				44.12	0	0.5	-2	1	0	1	0	3	2.5
		44.16	-23.5	-24	-24	-22	-22	-21.5	-20	-18	-22.5				44.16	-1	0	-3	1	0	1	2	3	1
		44.2	-23.5	-25	-22.5	-21	-23	-21.5	-19.5	-18.5	-23				44.2	-1	-0.5	-1.5	0.5	-1	1.5	2	2	0.5
		44.24	-23.5	-24	-22.5	-21.5	-23	-22.5	-19.5	-18	-23.5				44.24	-1.5	0	-0.5	1	-2	1	1	1.5	0.5
		44.28	-24	-22.5	-22.5	-22.5	-23	-21.5	-21	-18	-22				44.28	-1.5	0	0.5	0.5	-0.5	1	0	2	1.5
		44.32	-24.5	-22	-23	-24	-22.5	-21.5	-21.5	-21.5	-21.5				44.32	-0.5	0	-1	-0.5	1.5	0	-1	1	2
		44.36	-23.5	-21.5	-23	-23.5	-21.5	-22.5	-20.5	-22	-21.5				44.36	1	1	-1	-1	1.5	0	-0.5	1.5	2
		44.4	-23.5	-23	-23.5	-22.5	-22.5	-22	-20	-21	-20.5				44.4	0.5	0	-1.5	0	0	0	0.5	0.5	2.5
		44.44	-25	-24	-23.5	-22.5	-23.5	-21.5	-20.5	-20	-20				44.44	-0.5	-0.5	-1.5	0	-0.5	0.5	0.5	0.5	2
		44.48	-25	-24	-22.5	-22.5	-24	-21.5	-21.5	-20	-19.5				44.48	0.5	1	-1.5	1	-2	1	-1	0.5	2.5
		44.52	-24	-24.5	-22.5	-23.5	-22.5	-23	-22	-20	-19.5				44.52	-0.5	1	-1	0.5	-1.5	1	-2.5	0.5	3
		44.56	-23.5	-24.5	-23.5	-24	-22.5	-22	-21.5	-19.5	-21				44.56	-1	0	-2	0.5	-1.5	0.5	-1	0	2.5
		44.6	-23.5	-24.5	-22.5	-24	-23	-19.5	-20.5	-20.5	-22				44.6	0	0	-0.5	1	-1	0.5	1	0	2
		44.64	-23.5	-24.5	-21.5	-22.5	-23.5	-19	-19	-20	-22.5				44.64	1.5	1	0	1.5	-1.5	1.5	2	0.5	0.5
		44.68	-22.5	-26	-22	-22	-22	-20.5	-18.5	-20	-22				44.68	2	0	-0.5	0.5	-1.5	2.5	1.5	0	0
		44.72	-22.5	-26	-23	-20.5	-22	-23	-20.5	-18.5	-21				44.72	1	0	-1	1	-2.5	2	0	1	0
		44.76	-22.5	-25.5	-24.5	-21	-23	-23	-22	-18.5	-21				44.76	0.5	0.5	-1	1	-2	0.5	-1.5	1	0
		44.8	-23.5	-25	-24	-21.5	-23	-21.5	-21.5	-19	-21.5				44.8	0	0	-1	0.5	-1	0.5	-0.5	1	1
		44.84	-22.5	-24	-23	-21.5	-23	-21.5	-21	-21	-21.5				44.84	0.5	0	-1.5	0.5	-1	1	-1.5	0.5	1.5
		44.88	-21.5	-24	-22.5	-22.5	-22	-21	-20	-20	-23				44.88	0	-1	-2.5	0	-0.5	1.5	-1.5	0.5	1.5
		44.92	-22.5	-22.5	-22.5	-23.5	-22.5	-21.5	-20.5	-18	-22.5				44.92	-1.5	-0.5	-1	-0.5	-1	1	-1	1.5	1.5
		44.96	-23	-23.5	-22.5	-23.5	-22.5	-21.5	-21.5	-18	-21				44.96	-1	-0.5	-0.5	0	-1	2	0	2	1.5
		45	-22.5	-24	-22	-25	-22.5	-21.5	-21.5	-18.5	-19.5				45	1	0	0.5	-1.5	-1.5	1	0.5	1.5	2.5
		45.04	-22.5	-22.5	-22	-25	-22.5	-20	-20.5	-19	-20.5				45.04	1	0.5	-1	0	-1.5	2	1.5	1	2.5
		45.08	-23	-22.5	-22	-25	-23	-20	-20	-18	-20.5				45.08	-0.5	0	-1.5	1	-0.5	1	1	1	2.5
		45.12	-23.5	-22.5	-22	-23.5	-22.5	-21.5	-20	-18.5	-21.5				45.12	-1.5	1	-0.5	1	0	0	1	1	2.5
		45.16	-23.5	-23.5	-23	-23	-22	-21.5	-20	-19.5	-22				45.16	-1	1	0	0.5	-0.5	-0.5	0.5	1.5	2.5
		45.2	-22.5	-23.5	-21.5	-23.5	-22.5	-19.5	-19.5	-19.5	-22				45.2	0.5	0.5	0.5	0	-1.5	0.5	0.5	2	1
		45.24	-22	-23	-21.5	-24.5	-23	-20.5	-19	-20	-22				45.24	1.5	0.5	0	-0.5	-2	0.5	0	1.5	1.5
		45.28	-22	-23	-23	-23.5	-22.5	-21	-20.5	-19.5	-21.5				45.28	1	-1	-1	0.5	-2.5	1.5	-0.5	1	2
		45.32	-22.5	-23	-24	-23.5	-21.5	-22	-20.5	-20	-22.5				45.32	0	-1	-1	-0.5	-2	0	-1	-1	1
		45.36	-23	-22.5	-23	-23	-21.5	-21.5	-21.5	-19.5	-22.5				45.36	-1	0	-1	0.5	-0.5	1	-0.5	-1	1.5
		45.4	-24	-23.5	-23.5	-23	-21.5	-21	-21	-20	-21				45.4	-1.5	0.5	-2.5	1	0.5	2	1	-0.5	2
		45.44	-23	-22.5	-23.5	-22	-21.5	-21	-20	-21	-20.5				45.44	1	0.5	-2.5	0.5	0	2	1	0.5	1.5
		45.48	-22	-22.5	-22	-21	-23	-20.5	-20.5	-21	-21				45.48	1.5	0	-0.5	1.5	-1.5	2	0	1	0.5
		45.52	-22	-23.5	-20.5	-22	-22.5	-20.5	-22	-21	-20.5				45.52	2	-1	0.5	1.5	-1.5	1.5	-1.5	0	2
		45.56	-23	-23.5	-21	-23	-21.5	-20.5	-21.5	-20.5	-20.5				45.56	0.5	0	0	1.5	0	1.5	-2	1	3.5
		45.6	-23.5	-23	-23.5	-24	-23	-20.5	-21	-20	-22				45.6	0	1	-1.5	1	-0.5	1	-0.5	0.5	3
		45.64	-23.5	-21.5	-23	-23.5	-24	-21.5	-19.5	-21	-22				45.64	0.5	1.5	-0.5	0.5	-1.5	0.5	2	-0.5	2.5
		45.68	-23.5	-21.5	-22	-23	-24	-22.5	-19	-20	-21.5				45.68	0.5	2.5	0	0	-1.5	0.5	2.5	0.5	3
		45.72	-25	-22	-21	-22	-23.5	-21	-20	-19.5	-21				45.72	-1	1.5	1	0	0	1.5	2	0.5	3.5
		45.76	-25	-22.5	-22	-22.5	-23	-20.5	-20	-19.5	-21.5				45.76	-1.5	2	-0.5	0	0.5	2	1.5	1	3.5
		45.8	-24.5	-23.5	-22	-22.5	-23	-20.5	-21	-19	-21.5				45.8	-1.5	0	0	-0.5	-0.5	1.5	-0.5	1.5	3
		45.84	-23.5	-23.5	-21.5	-22	-23.5	-19.5	-21	-20.5	-21				45.84	1	-1	-0.5	0.5	-2.5	1.5	-0.5	0.5	3.5
		45.88	-24.5	-24	-21	-21.5	-23.5	-19	-21.5	-21	-20				45.88	0	-1	-0.5	1	-3	1	-1	0	3
		45.92	-24.5	-24.5	-20	-23	-23	-19	-22.5	-21	-20.5				45.92	0.5	-1.5	0	-1	-2	2	-1.5	0	1.5
		45.96	-24	-23	-21	-23.5	-23	-19.5	-21.5	-20	-21				45.96	0	-1	-0.5	-1	-1.5	2	0	0.5	1.5
		46	-23	-22	-22.5	-23.5	-22	-20	-21.5	-19.5	-21.5				46	0.5	-0.5	-2	-0.5	-1	2	0.5	1	2
		46.04	-22.5	-22	-23.5	-23	-21	-20	-20.5	-20	-20.5				46.04	0	0.5	-2	0.5	-0.5	1.5	1	1	3
		46.08	-23	-23	-23	-22	-20.5	-21	-20	-19	-20.5				46.08	-1	0	-2	1	-1	1	2	2	3
		46.12	-23.5	-23	-22.5	-22	-20.5	-21.5	-20	-19	-21				46.12	-0.5	0.5	-1	0.5	-1	1	2.5	1	3.5
		46.16	-24.5	-23	-22.5	-22	-21.5	-21	-20.5	-19	-22				46.16	0.5	-1	-1	0.5	-0.5	1.5	1.5	2	3.5
		46.2	-25	-23	-22.5	-23	-22	-22	-20.5	-18.5	-21.5				46.2	0	-1.5	-1.5	-0.5	0	0	0.5	2	2
		46.24	-25	-22.5	-23	-23.5	-22	-21.5	-21	-18.5	-20.5				46.24	0.5	0	-1	-0.5	-1	-0.5	0	2	2.5
		46.28	-24	-23	-22.5	-23.5	-22.5	-21.5	-21.5	-20	-20				46.28	1.5	1	0	1	-1.5	-2	1	1	3
		46.32	-22	-23.5	-22	-24	-22	-21.5	-22.5	-20.5	-20				46.32	1.5	-0.5	0	1	-1	-2	0	0.5	3
		46.36	-21.5	-23	-23	-23.5	-23	-21.5	-22.5	-20	-21				46.36	2	-1	-2	1.5	-1	0	-1	0	2
		46.4	-22.5	-22.5	-23.5	-22.5	-23	-22	-21.5	-19	-22				46.4	1.5	-0.5	-3	1.5	-1.5	0.5	-1	0	2
		46.44	-23	-22	-23.5	-22.5	-23.5	-22.5	-19.5	-19.5	-23				46.44	1.5	0.5	-1.5	1	-0.5	1.5	0.5	0.5	1
		46.48	-23.5	-23	-22.5	-23	-23.5	-22	-19	-20	-23				46.48	1.5	1	0	0.5	0	1.5	0.5	1.5	2
		46.52	-24.5	-25	-22.5	-23	-22.5	-20.5	-20.5	-20.5	-22				46.52	0.5	1	-1	1	-1	1	-0.5	1	2
		46.56	-25.5	-25	-22	-23.5	-22	-21	-21	-19.5	-21				46.56	-0.5	1	-2	0	-1.5	1	-1	1.5	2.5
		46.6	-25	-23.5	-20	-23.5	-22	-23	-21.5	-18.5	-21.5				46.6	0	1.5	-0.5	0.5	-1.5	0	-1	2	3
		46.64	-24.5	-23	-20.5	-22	-22.5	-22.5	-21	-19.5	-21.5				46.64	-0.5	1	-1	2	-1.5	-1.5	-1.5	1	3.5
		46.68	-24.5	-24	-21.5	-20	-23	-21.5	-20.5	-19.5	-21.5				46.68	-1	0	-1.5	2.5	-0.5	-1.5	-0.5	0.5	2.5
		46.72	-24.5	-24	-22.5	-19	-21.5	-20	-21.5	-20.5	-22				46.72	-1.5	0	-2.5	2	-0.5	0	-0.5	0.5	2
		46.76	-24	-23	-21.5	-20	-21	-19.5	-21	-19.5	-20.5				46.76	-0.5	0.5	-2	2	0	2	1	0.5	2.5
		46.8	-25	-23.5	-22.5	-21.5	-21.5	-18.5	-21	-18.5	-19				46.8	-0.5	1	-2.5	1	-0.5	4	1	0	3.5
		46.84	-26	-24.5	-23	-22.5	-22.5	-18.5	-20	-19	-20				46.84	0.5	0	-1.5	0.5	-1	3.5	-0.5	1	3.5
		46.88	-25.5	-24.5	-23	-21.5	-22	-19.5	-19	-18.5	-21.5				46.88	0.5	-0.5	0	1	-1.5	2.5	0	2.5	2
		46.92	-24	-24	-23	-22	-21.5	-20.5	-20	-20.5	-22.5				46.92	1	-0.5	0	0	-0.5	1	0.5	1.5	0.5
		46.96	-23.5	-24	-23	-22.5	-22	-22.5	-21	-21	-22				46.96	0.5	-0.5	-1	0	-0.5	1	1	1	1
		47	-24	-24	-22.5	-22.5	-22.5	-22	-21	-19	-22				47	-0.5	-1	-1.5	-0.5	-1	1	1.5	1	2.5
		47.04	-23	-24.5	-21	-23.5	-22.5	-21	-20	-19	-21.5				47.04	0	-1.5	-1.5	-1	-1	2.5	1	0.5	4
		47.08	-21.5	-23	-22.5	-24	-23	-20.5	-19	-19.5	-21.5				47.08	1	-0.5	-2	-0.5	-0.5	2	0.5	0.5	3.5
		47.12	-22.5	-22.5	-23.5	-23	-21.5	-20.5	-19	-19.5	-21				47.12	1.5	2	-2.5	0.5	0.5	0.5	-1	2	2.5
		47.16	-24.5	-23	-24.5	-21	-21.5	-20.5	-20.5	-19.5	-21.5				47.16	0	1.5	-3	2.5	0	0.5	-0.5	2.5	2.5
		47.2	-24.5	-23.5	-24.5	-21.5	-21.5	-20.5	-21	-18.5	-21				47.2	-0.5	1	-3	2.5	0.5	1	-0.5	3	3
		47.24	-23	-23.5	-23.5	-21	-22	-20	-20.5	-17.5	-21				47.24	0	0.5	-2.5	1.5	0	2	0.5	2.5	2.5
		47.28	-23	-23.5	-23	-21	-23	-19	-20	-17	-21.5				47.28	-0.5	-1	-2	1	-1.5	1.5	0	2	2.5
		47.32	-23	-23	-23	-21	-22.5	-19	-19.5	-17.5	-23.5				47.32	-1	-1	-0.5	1.5	-1	-0.5	1	1	2
		47.36	-23.5	-22.5	-22.5	-22	-22	-20	-19.5	-18.5	-24				47.36	0	0	0	0.5	0	-0.5	0.5	1.5	2
		47.4	-23.5	-22.5	-22.5	-22.5	-23.5	-20	-19.5	-19.5	-23				47.4	0.5	0	0.5	-0.5	0	0.5	0.5	1.5	2.5
		47.44	-24	-22.5	-23	-22.5	-24.5	-19.5	-19.5	-21	-21.5				47.44	0	0	-1	0	-0.5	1	0.5	0.5	2.5
		47.48	-23	-23.5	-22	-22	-24	-19.5	-20	-20.5	-21				47.48	-1	0	-1	2	-1	1	0	-0.5	2.5
		47.52	-23	-22.5	-21.5	-22	-22.5	-20	-21	-19	-20.5				47.52	-1.5	0.5	-1	3	-1.5	1.5	0	0	2.5
		47.56	-23	-22.5	-21	-21.5	-21	-21	-22.5	-18.5	-21				47.56	-2	1	-1	2.5	-1	2	0	0.5	2
		47.6	-23.5	-22	-22	-19.5	-21.5	-21.5	-22.5	-18	-20.5				47.6	-0.5	1	-2	3	-0.5	2	0.5	2	2.5
		47.64	-24.5	-21.5	-22	-20	-22.5	-21.5	-21	-18.5	-20.5				47.64	0	1	-1	2.5	-0.5	2.5	1.5	2	2
		47.68	-24.5	-22	-21	-21	-22	-22	-20	-18.5	-21				47.68	0.5	0.5	0	1	0.5	1.5	2.5	2	1.5
		47.72	-24	-22.5	-22.5	-22	-22.5	-21.5	-20	-19	-21				47.72	0	0.5	-0.5	0.5	0	1.5	2	1	1
		47.76	-24	-23	-22.5	-22.5	-22.5	-20.5	-19.5	-18	-21				47.76	-0.5	0	-1.5	0.5	-0.5	2.5	1.5	1.5	2
		47.8	-24.5	-23	-22.5	-21.5	-23	-20	-20.5	-17.5	-20.5				47.8	-1	0	0	1	-1	2.5	0.5	2	3
		47.84	-23.5	-23	-23	-22	-22	-20.5	-21.5	-17.5	-21				47.84	-1	-0.5	-0.5	0.5	-0.5	1	0	2.5	2
		47.88	-22.5	-24	-23	-21.5	-21	-21	-22	-18	-21				47.88	-0.5	0	-1	0.5	0.5	0.5	-0.5	2	1.5
		47.92	-22.5	-26	-23	-21.5	-21	-22	-21	-19.5	-21.5				47.92	0	-1	-2	0.5	0	1	0.5	1	1
		47.96	-22.5	-26	-22.5	-22	-23.5	-21.5	-21.5	-20.5	-22				47.96	-0.5	-1.5	-2	0	-1	1	0	0.5	2
		48	-22.5	-24.5	-23.5	-22	-24	-21.5	-20.5	-20.5	-21.5				48	-0.5	-0.5	-2	0	-2	0.5	1	0.5	2.5
		48.04	-21	-23.5	-23	-21.5	-23.5	-22.5	-20.5	-19.5	-21.5				48.04	0.5	1	-2	0.5	-2	0.5	1	0.5	2.5
		48.08	-21.5	-22.5	-23	-21	-23	-22.5	-21	-19	-21				48.08	1.5	2	-2	2	-2	1.5	0	1	2
		48.12	-22.5	-22.5	-22.5	-21	-23	-21.5	-21.5	-19	-22				48.12	2	1.5	-2	2	-2	2	-1	2	1
		48.16	-24	-22	-22.5	-21.5	-22	-20.5	-22.5	-19	-22				48.16	0.5	2	-1.5	1	-1	2.5	-2	1.5	1
		48.2	-24.5	-22.5	-22	-22	-21.5	-19.5	-21.5	-18	-22				48.2	-1	2.5	-2	0	-0.5	3	-1	1.5	1
		48.24	-24	-24	-22	-23.5	-21.5	-19.5	-20.5	-19	-21				48.24	-0.5	1.5	-2	-0.5	0	2.5	-0.5	0	2
		48.28	-23.5	-23	-22.5	-22.5	-22	-20	-21.5	-19.5	-21				48.28	0.5	1	-1.5	-0.5	-0.5	2	-1	-1	0.5
		48.32	-24	-23	-23	-21.5	-23	-19	-20.5	-20	-21.5				48.32	1	0	-1	0	-1	2	0.5	-1	-0.5
		48.36	-24	-22.5	-22	-21.5	-22.5	-19.5	-20.5	-19.5	-21				48.36	0.5	0	0	-0.5	-1	1	0.5	0	-0.5
		48.4	-24	-23	-23	-22	-22	-20	-22	-20	-20				48.4	-1	0	-1	1	0	1	-0.5	0.5	0.5
		48.44	-24	-23.5	-23	-22	-22	-20	-22.5	-20	-21				48.44	-3	-0.5	-2	1	0	1	-1.5	2	1
		48.48	-23.5	-24	-22.5	-22	-22	-20.5	-22.5	-20	-23				48.48	-1.5	0	-2	0.5	0	0.5	-1	3.5	0.5
		48.52	-24.5	-23	-22	-21.5	-21.5	-21.5	-21.5	-19.5	-23				48.52	0	1	-1.5	0.5	0	1	1	4	1.5
		48.56	-23.5	-23	-21.5	-22	-21.5	-21.5	-21	-18.5	-22				48.56	0	0.5	0	-0.5	0.5	1.5	1	3	1
		48.6	-23.5	-23.5	-21	-22.5	-21.5	-22.5	-21.5	-19.5	-22				48.6	-0.5	-0.5	0.5	-0.5	1	1	1	1	1
		48.64	-24	-23.5	-21.5	-22	-21.5	-23	-21.5	-22	-22				48.64	-0.5	-1	0	0.5	0.5	0.5	0.5	-1.5	0.5
		48.68	-25	-24.5	-23	-23	-23	-22.5	-21.5	-23	-23				48.68	-0.5	-1.5	-1	-0.5	-0.5	0	0	-1.5	0
		48.72	-24	-23.5	-24	-22.5	-23.5	-21.5	-21	-21	-22.5				48.72	0.5	0.5	-1.5	0	0.5	0.5	0.5	0	1
		48.76	-24.5	-23	-24	-20.5	-23	-21	-20.5	-19	-21.5				48.76	-0.5	1.5	-2	0.5	1	0.5	0.5	1.5	2.5
		48.8	-24	-22	-23	-19.5	-22	-20	-20	-19	-21.5				48.8	-1	2	-1	1.5	0	1.5	0	1	2
		48.84	-22.5	-21.5	-22	-20.5	-20.5	-20	-19	-18.5	-20.5				48.84	-0.5	1.5	-1	1	0	2	0.5	1	1.5
		48.88	-22.5	-21.5	-21	-21.5	-20.5	-20.5	-20.5	-19.5	-20				48.88	0.5	1	-1	1	0	2.5	-1	0.5	2
		48.92	-23	-21.5	-22	-22	-22	-21	-21	-19.5	-20.5				48.92	1	0.5	-2	2	0.5	1	-1.5	0.5	1
		48.96	-24	-21.5	-21.5	-21	-22.5	-20.5	-20.5	-19.5	-21.5				48.96	1	1.5	-1	2.5	1	1.5	-0.5	1	1
		49	-24.5	-23.5	-22	-21.5	-22	-20.5	-20.5	-19	-21				49	0.5	0.5	0	1	-0.5	2	1	2	1.5
		49.04	-24	-22.5	-22.5	-22.5	-20.5	-20.5	-21	-18.5	-21.5				49.04	-1.5	0	-0.5	-1.5	-0.5	2	1	2	3
		49.08	-23.5	-23	-22	-22.5	-19	-20.5	-20	-19	-23				49.08	-1.5	0	-0.5	-1.5	0.5	1.5	1.5	2.5	2
		49.12	-22.5	-23	-21.5	-23	-21	-20.5	-19	-19.5	-23				49.12	-1	0.5	-1	-1	-0.5	1	2	1.5	1.5
		49.16	-23	-23	-21.5	-23.5	-22	-20.5	-18.5	-19	-22.5				49.16	-1.5	0.5	-0.5	0	-0.5	0.5	2.5	1.5	1
		49.2	-24.5	-23	-21.5	-23.5	-24	-21	-19.5	-18	-20.5				49.2	-0.5	0.5	1	1	-1	0.5	1	2	2.5
		49.24	-23.5	-23	-22.5	-23.5	-23.5	-21	-19.5	-18	-20.5				49.24	0.5	1	0.5	0	-1.5	2	1	3	3
		49.28	-24	-24	-23	-23.5	-23	-20.5	-19.5	-18	-21				49.28	1	0.5	-1	-1	-2	2.5	2	3	3
		49.32	-25	-24	-23	-22.5	-22	-20.5	-20	-19	-22.5				49.32	0.5	0	-2.5	-0.5	0	2	2	1	1.5
		49.36	-25.5	-24	-22.5	-22	-22	-21	-21.5	-20	-22				49.36	0.5	-0.5	-3	0	1.5	1	1	0.5	1
		49.4	-24.5	-23	-23	-22.5	-22.5	-21.5	-21.5	-19.5	-22.5				49.4	-0.5	0	-3	0.5	2.5	0	0.5	0.5	1
		49.44	-23.5	-22.5	-22.5	-22	-22	-21.5	-20.5	-20	-21				49.44	0.5	0.5	-1.5	1	2	-1	0.5	0.5	2
		49.48	-23.5	-22	-21	-22.5	-22	-21.5	-20	-20.5	-21				49.48	0.5	1	0.5	0	0	-1.5	0.5	-0.5	2
		49.52	-23.5	-23	-21	-22	-21.5	-21	-20	-20.5	-22				49.52	1.5	-1	0	0	-1.5	-0.5	0	-1	2
		49.56	-24.5	-24	-22	-22.5	-20	-21	-20	-20	-22.5				49.56	0.5	-1.5	0	-0.5	-1	1	0	0	1.5
		49.6	-24	-24	-22	-22.5	-20.5	-21	-19.5	-19.5	-21.5				49.6	0.5	-1	-1	-0.5	-0.5	2	0.5	1	2
		49.64	-23.5	-24	-20.5	-23.5	-21.5	-21.5	-20	-20	-21				49.64	-0.5	0.5	0	-1	-0.5	1	1	1.5	1
		49.68	-22.5	-23	-20	-23	-21	-22.5	-20	-20	-22				49.68	0	1.5	0	-0.5	0.5	-0.5	1	0.5	-0.5
		49.72	-22.5	-22	-21	-22.5	-20	-22.5	-19.5	-19.5	-22				49.72	1	1	-0.5	0.5	0.5	-0.5	1.5	1.5	-0.5
		49.76	-22.5	-23	-22	-22	-20.5	-22.5	-19	-20	-21				49.76	1	0.5	-1	1.5	0	-2	2	1	1
		49.8	-22.5	-22.5	-22.5	-22	-21	-23	-20	-20	-22				49.8	1	0.5	-1	0.5	1	-3	2	0	1
		49.84	-23	-23	-23	-22.5	-21	-22.5	-21.5	-20.5	-20.5				49.84	1	1	-1	0	1	-2.5	1	0.5	2.5
		49.88	-23.5	-23.5	-23	-22.5	-22.5	-21.5	-22.5	-22	-20				49.88	-0.5	0	-0.5	0	0	-1.5	0.5	1	2.5
		49.92	-23	-23	-23	-21.5	-24	-21	-21.5	-21.5	-21				49.92	0	0	-1	0.5	-1	-0.5	0	2	1.5
		49.96	-22	-24	-24	-22	-25	-21	-20	-21	-21.5				49.96	1.5	-0.5	-3	1.5	-2.5	-0.5	0.5	2.5	0.5
		50	-22	-24	-23.5	-21	-23.5	-21.5	-19	-22	-21.5				50	1.5	0	-2.5	2.5	-1.5	-1	0.5	1	0.5
		50.04	-23.5	-24	-22	-21	-23	-21.5	-19	-20.5	-21				50.04	0.5	-0.5	-1	1	0	1	1	0.5	1
		50.08	-24.5	-24.5	-21.5	-19.5	-22.5	-20.5	-18	-19	-20.5				50.08	0	-1.5	0.5	1	0.5	2.5	1	1.5	1.5
		50.12	-24.5	-23.5	-21	-20	-22.5	-20	-18	-18.5	-21				50.12	-1	-1	0	1	0.5	2.5	0.5	1	1
		50.16	-24.5	-23	-22	-21.5	-22.5	-20	-18.5	-19	-21.5				50.16	-0.5	-0.5	-1	-0.5	0.5	2	0.5	0.5	0
		50.2	-24.5	-23	-23	-22	-21.5	-20.5	-20	-20	-22				50.2	0.5	1	-1.5	0	0.5	2.5	-0.5	-0.5	-0.5
		50.24	-24	-23.5	-23	-21.5	-21	-20	-20.5	-21	-22				50.24	0	2	-1	0	1	2.5	-0.5	0	-1
		50.28	-24.5	-22.5	-23	-22	-21.5	-20.5	-20	-20	-22				50.28	0.5	2.5	-1.5	0	0.5	0.5	0	0.5	0.5
		50.32	-25	-22	-23	-22.5	-23	-20	-20	-19	-22				50.32	1	1.5	-1.5	-0.5	0	-0.5	1.5	0.5	1
		50.36	-24.5	-22	-22.5	-22.5	-23	-19.5	-20	-18.5	-23.5				50.36	1	0.5	-1	-1	0.5	0.5	1	2	0.5
		50.4	-24	-21.5	-23	-23	-23	-18.5	-21.5	-19	-23.5				50.4	0.5	0.5	-1.5	-2	1	0	0	1.5	0.5
		50.44	-25.5	-22.5	-23.5	-23	-23	-19	-21	-20	-22				50.44	-1.5	0	-2	-2	-0.5	-0.5	0.5	1.5	1
		50.48	-24.5	-22.5	-23.5	-22	-22	-20	-20.5	-20	-19.5				50.48	-1.5	0	-2	-0.5	-1.5	-0.5	-0.5	1.5	2
		50.52	-24	-22	-22.5	-22.5	-22	-20	-20	-21	-19				50.52	-1	1	-1	-0.5	-1.5	0.5	-1.5	1	2
		50.56	-24	-21.5	-23	-22.5	-22	-20	-20	-20	-20				50.56	-0.5	2	-0.5	0	-1.5	1	-2	2	1
		50.6	-24.5	-22.5	-22.5	-21	-22	-20	-20.5	-19.5	-21				50.6	-1	2	-1	0	-1	1	-0.5	3	0.5
		50.64	-24	-24	-22	-20.5	-21.5	-20.5	-21	-20	-21.5				50.64	-0.5	0	-1	0.5	1	0	1	1.5	1
		50.68	-23.5	-24	-22.5	-21.5	-19.5	-20.5	-21	-20.5	-21.5				50.68	0.5	0	-2	-1	1.5	0	0	1	1
		50.72	-23.5	-25	-23	-21.5	-20	-20	-20.5	-20	-21				50.72	1	-1	-1.5	-0.5	0.5	-0.5	0	1	1.5
		50.76	-24.5	-24.5	-22.5	-22	-22.5	-20	-21	-20.5	-22				50.76	1	-1.5	-1.5	0.5	-1.5	-0.5	-0.5	1.5	1.5
		50.8	-24.5	-23.5	-22	-22.5	-23	-21	-21.5	-20	-22.5				50.8	1	0	-1.5	1	-1	-2	-0.5	1.5	1.5
		50.84	-24.5	-22.5	-21.5	-22.5	-22.5	-21	-21	-19.5	-21				50.84	0.5	0.5	0	0.5	0.5	0.5	-0.5	1	1.5
		50.88	-23	-23	-21.5	-21.5	-22	-20.5	-20	-19	-19				50.88	0.5	0.5	1.5	0.5	1	2.5	0	2	1.5
		50.92	-23	-23	-21.5	-21	-21.5	-19	-20	-19.5	-19.5				50.92	-1	1.5	1	0.5	0	3.5	-1	2.5	2.5
		50.96	-23	-23.5	-21.5	-22	-21	-20	-21	-19	-22				50.96	-0.5	1.5	1	0.5	0.5	2	-1	4	2
		51	-24.5	-23.5	-22	-22	-21.5	-20.5	-21	-18.5	-23				51	-1	1	1	1.5	1	1	-1	3.5	0.5
		51.04	-25	-23	-22	-22	-22	-20.5	-18	-18.5	-22				51.04	-0.5	0.5	1	1.5	0	0	0	1.5	1
		51.08	-25	-22.5	-22	-22	-22	-20.5	-17	-18.5	-20.5				51.08	0.5	0	-1	0.5	-1	-0.5	0.5	1.5	0
		51.12	-25.5	-22	-20.5	-22	-21.5	-20	-17.5	-18	-22				51.12	0	1.5	-0.5	0	-2	1.5	0.5	2	-0.5
		51.16	-25.5	-22.5	-21	-21.5	-22.5	-20	-18	-19.5	-22.5				51.16	0.5	1	0	1	-2	3.5	1	1	0.5
		51.2	-24.5	-24	-21.5	-20.5	-23.5	-20.5	-20	-20	-22.5				51.2	1.5	0.5	-0.5	2	-1.5	2.5	2	1.5	0.5
		51.24	-25	-24	-22	-19	-24.5	-19.5	-22.5	-19.5	-22				51.24	0	-1	-0.5	1	-2	1	1.5	1.5	0
		51.28	-24.5	-22.5	-21	-19.5	-24.5	-19.5	-23	-19.5	-21.5				51.28	-0.5	0.5	0	0.5	-1.5	1	0	1.5	0.5
		51.32	-25	-21.5	-20.5	-21	-22	-20.5	-21.5	-20.5	-21.5				51.32	0	1	0	0	0.5	0.5	0	1.5	-0.5
		51.36	-25.5	-22	-22	-21.5	-22	-21	-19	-20.5	-22				51.36	0	0	-0.5	-0.5	0.5	0.5	0	2	-0.5
		51.4	-26	-22	-22.5	-21.5	-22.5	-21.5	-19	-21	-20.5				51.4	0	-0.5	0	-1	0.5	0	0	2	0.5
		51.44	-26	-22	-22.5	-23.5	-22	-21	-19	-21.5	-20.5				51.44	0	0	0	-0.5	0	0	1	1	0.5
		51.48	-27	-22.5	-23.5	-22.5	-22	-21	-19.5	-19.5	-20.5				51.48	0.5	1.5	-1	0.5	-0.5	-0.5	1	1.5	-0.5
		51.52	-27	-24	-23.5	-21.5	-21.5	-21.5	-20.5	-19	-21.5				51.52	0	0	-1	0.5	-0.5	0.5	0	1	-1
		51.56	-26	-23.5	-22	-21.5	-21.5	-21.5	-21	-18	-21.5				51.56	-0.5	-1	-0.5	1.5	0.5	0.5	-0.5	0.5	-1.5
		51.6	-24	-22	-21.5	-22.5	-21.5	-22	-21	-18	-21.5				51.6	0	0	0.5	0.5	1.5	0	0	1	-1.5
		51.64	-23	-20.5	-21.5	-23	-22.5	-22	-20	-18	-20.5				51.64	0	2	0	-0.5	2	-0.5	0.5	3	0.5
		51.68	-22.5	-21	-23	-21.5	-23	-22	-20.5	-20	-22				51.68	0.5	1	-1.5	0	0.5	0	0.5	1.5	0.5
		51.72	-22.5	-22.5	-23	-22	-23	-22	-20	-20.5	-23				51.72	1	-0.5	-2.5	-0.5	-0.5	0.5	0.5	1	0.5
		51.76	-23.5	-22	-21.5	-22	-23	-21	-20	-20	-23.5				51.76	0	-1	-1.5	-0.5	-1	1	1.5	0.5	0
		51.8	-24	-21.5	-21	-22	-22	-20.5	-20	-20	-23.5				51.8	-0.5	-0.5	0	0	-1	2	1.5	0.5	-1
		51.84	-24.5	-22.5	-21	-23	-23	-20.5	-19.5	-21	-23				51.84	1	0	0.5	-0.5	-1	1	2	0.5	-1
		51.88	-24	-23	-22	-23	-23	-20	-20	-21	-22.5				51.88	1	1	-0.5	0	-0.5	-0.5	0.5	1	1
		51.92	-23	-23	-23	-23	-23	-20	-20	-20	-21				51.92	0.5	0.5	-1.5	1	-0.5	-0.5	-1	2	2
		51.96	-23	-24	-22.5	-22	-21.5	-20.5	-19.5	-19.5	-21.5				51.96	-0.5	-0.5	-0.5	0.5	-0.5	0	-1	2.5	2
		52	-23.5	-24	-22	-21	-20.5	-20	-18.5	-18.5	-21.5				52	0	-1.5	-0.5	-1	-0.5	0.5	1	2.5	2
		52.04	-23.5	-23	-22	-21	-21	-20	-18.5	-18	-22.5				52.04	0.5	-0.5	-1	-1	-0.5	1	1.5	3	1.5
		52.08	-22.5	-23	-23	-22	-22.5	-20	-18.5	-17.5	-23.5				52.08	1	-1	0.5	-1.5	0	0.5	1.5	4	0.5
		52.12	-22	-21.5	-23	-22	-23	-21	-18.5	-17.5	-22				52.12	1.5	0.5	0	0.5	-0.5	0	1	2.5	1.5
		52.16	-23	-20.5	-21.5	-22	-23	-20.5	-20.5	-18	-22				52.16	0.5	1	-0.5	1.5	-0.5	-0.5	0	1.5	1.5
		52.2	-23	-20	-21	-21	-22	-20.5	-21	-19	-21				52.2	0	1.5	-1.5	2	0	0	-0.5	1.5	1.5
		52.24	-23.5	-21	-21.5	-20	-22.5	-20.5	-20	-19.5	-21.5				52.24	-1	1.5	-1	3	0.5	1	0	1	1
		52.28	-24	-21.5	-21	-20.5	-22.5	-20	-20	-19.5	-20.5				52.28	-2	1.5	0	2.5	0.5	2.5	1	1	2
		52.32	-25.5	-21.5	-22	-21	-20.5	-19.5	-21	-19.5	-21				52.32	-2	0.5	-0.5	1.5	0	2	0	2	0.5
		52.36	-26	-22	-22	-21.5	-22.5	-20	-21.5	-20	-22				52.36	-2.5	-0.5	-1	0	-0.5	-0.5	-1	1.5	-1
		52.4	-25	-23	-24	-22.5	-23	-21.5	-21.5	-20.5	-24				52.4	-1.5	-1	-1	-1	-1	-2	-1.5	0.5	-2.5
		52.44	-24	-24.5	-24.5	-24	-22.5	-21.5	-21	-21	-25				52.44	-0.5	-1	-1	-1.5	-0.5	-1	-1.5	0.5	-2.5
		52.48	-24	-23.5	-24.5	-22	-22	-22	-20	-20	-24.5				52.48	-0.5	0	-1.5	1	-0.5	-0.5	0	1.5	-2
		52.52	-24	-23.5	-24	-22	-21	-21.5	-20	-19.5	-22				52.52	-1	-1	-1	1	-0.5	0.5	0.5	2	-1
		52.56	-23	-23	-22.5	-22	-21	-21	-19	-19	-20.5				52.56	-0.5	-1	0.5	0	-0.5	1	1	2.5	0.5
		52.6	-23	-22	-21.5	-21	-21.5	-20.5	-19	-19.5	-21.5				52.6	0.5	0.5	0.5	0	-0.5	1	2	2	1
		52.64	-24.5	-21.5	-20.5	-21.5	-22	-21.5	-19.5	-19.5	-23				52.64	0.5	0.5	0	0.5	0	-0.5	1	1	0.5
		52.68	-25	-21.5	-22	-22.5	-23	-20.5	-20.5	-18.5	-23.5				52.68	0	0.5	-1	1	0	0	-0.5	0	0
		52.72	-25.5	-21.5	-22.5	-24	-23.5	-20.5	-20.5	-17.5	-24.5				52.72	-1	0	-1	0.5	-2	0.5	-0.5	1	-1
		52.76	-26	-21.5	-22.5	-24	-22.5	-20.5	-20	-18.5	-22				52.76	-2	0.5	-1.5	1	-1	1	-0.5	1.5	1
		52.8	-25.5	-21	-22	-24	-23	-21	-20	-19	-20.5				52.8	-2.5	1	-2.5	0.5	0	1	0	2.5	2
		52.84	-24	-22	-22.5	-22.5	-22.5	-21.5	-19.5	-20	-21				52.84	-1	0	-2	0.5	1	0.5	1.5	1	1
		52.88	-23	-23	-23.5	-21	-21.5	-20.5	-19.5	-20	-22				52.88	0	0.5	-1.5	1	2	1	2.5	0	0.5
		52.92	-23.5	-24	-24	-21.5	-21	-21	-20.5	-20	-21				52.92	-0.5	-1	-1.5	1.5	2	1.5	1.5	0	1
		52.96	-24	-24	-23	-23	-21	-21.5	-21	-21	-20.5				52.96	0	-1	-2	1	2	1.5	1	0	0.5
		53	-23	-22.5	-22	-23	-21.5	-22.5	-20.5	-21	-21				53	0	1	-2	1	2	0.5	0	0	-0.5
		53.04	-24.5	-21	-22	-22	-21	-22.5	-20.5	-21	-21				53.04	-0.5	2	0	0.5	2	1	0	-0.5	0
		53.08	-24.5	-21	-22.5	-21	-21	-21	-19.5	-20	-20.5				53.08	-1	1.5	0	1.5	0.5	1	0.5	0.5	0.5
		53.12	-23.5	-23	-22	-21	-21.5	-19.5	-18.5	-19.5	-21				53.12	-0.5	-0.5	0	1.5	-0.5	0.5	1.5	2	-0.5
		53.16	-23	-24.5	-21	-21.5	-22	-19.5	-19.5	-19.5	-22				53.16	0	-2.5	0.5	1.5	-1	1	0.5	1	-1
		53.2	-24	-24.5	-21.5	-21	-22.5	-21.5	-21	-20	-22.5				53.2	0	-4	0.5	2	-0.5	1	-0.5	0.5	-1
		53.24	-24.5	-24.5	-21.5	-21.5	-23.5	-22	-20.5	-20	-23.5				53.24	0	-3	0	1.5	-1	1	-1.5	0.5	-1.5
		53.28	-24.5	-23	-21.5	-22.5	-24	-21	-20.5	-21	-23				53.28	0.5	-2	-1.5	0.5	-0.5	2	-1	0	-0.5
		53.32	-23.5	-22	-23	-24	-25	-20.5	-20	-21	-22.5				53.32	2	0	-2.5	-1.5	-1.5	1	1.5	1	0.5
		53.36	-23	-22	-23	-23	-24	-21	-20	-20.5	-22				53.36	1.5	0.5	-1.5	-1.5	-1.5	0.5	2.5	2	1
		53.4	-22.5	-23	-22.5	-23.5	-23.5	-21.5	-22	-20	-21.5				53.4	0.5	0.5	-1	-1.5	-1	0.5	2	3	2
		53.44	-23	-22	-22.5	-23	-23.5	-21	-22.5	-19.5	-21.5				53.44	0	1	-1	-1	-1	2.5	1.5	1.5	1.5
		53.48	-23.5	-21	-24	-22.5	-23	-20.5	-20	-20	-23				53.48	0	1.5	-1.5	0	-1	2	1	0	0
		53.52	-22.5	-23	-24.5	-22.5	-22.5	-20	-19	-20	-23.5				53.52	0	0	-0.5	-1	-0.5	1.5	1.5	1	-0.5
		53.56	-22.5	-24.5	-24.5	-22.5	-21.5	-19	-19	-20	-22				53.56	0.5	-0.5	0	0	-0.5	2.5	2.5	2.5	0
		53.6	-23	-23.5	-25	-22	-22	-18	-18.5	-19.5	-20.5				53.6	0.5	0.5	-1	2	0	2.5	3	2.5	0.5
		53.64	-23.5	-23.5	-24.5	-23	-24	-18	-18.5	-19.5	-21				53.64	0.5	0	-1	2	-0.5	2.5	3	1.5	0.5
		53.68	-24	-23.5	-23	-23	-23	-18	-19.5	-20	-22				53.68	0.5	-0.5	-0.5	1.5	0.5	2	2.5	1	1.5
		53.72	-23	-23	-22	-23.5	-22	-19	-20.5	-19.5	-22				53.72	0.5	1	0.5	1	0.5	1	0.5	2	1
		53.76	-22.5	-24	-23	-24	-21	-20.5	-21.5	-18.5	-21.5				53.76	0	0	-0.5	1	1.5	1	-1.5	3	0.5
		53.8	-21.5	-23.5	-23	-24	-21.5	-21	-20.5	-19	-21.5				53.8	1	0.5	-0.5	0	1	0.5	-1	3.5	1.5
		53.84	-22	-23	-23	-24.5	-23.5	-20.5	-20.5	-19.5	-21.5				53.84	0.5	1.5	-1	-0.5	-0.5	1	1	2.5	1
		53.88	-22.5	-22.5	-23.5	-24	-24	-20.5	-21.5	-19.5	-21				53.88	-0.5	1.5	-2	-0.5	-1.5	1.5	1	0.5	1
		53.92	-24	-23.5	-23	-23	-24	-20	-21	-19.5	-19.5				53.92	-2	0	-2	-1	-1.5	2	1	0.5	2.5
		53.96	-24	-23	-22.5	-21.5	-23	-20.5	-20.5	-19.5	-19				53.96	-1	0	-1.5	0	-1.5	1	0.5	0.5	3
		54	-23.5	-23.5	-22.5	-22	-22.5	-21	-20	-20.5	-18.5				54	-1	-1	0	0	-1	-0.5	0.5	-1	3
		54.04	-23.5	-24	-23	-22.5	-22	-20.5	-19.5	-22	-19				54.04	-1	-0.5	0.5	0	-1.5	0.5	0.5	-1.5	2.5
		54.08	-23.5	-24	-23	-21.5	-22	-21	-20.5	-21.5	-19.5				54.08	-1	0.5	-0.5	0.5	-0.5	0	-1	0	1
		54.12	-23	-23	-24	-21.5	-22.5	-21	-20	-21.5	-20.5				54.12	-2	0.5	-1.5	1	-0.5	0	-1	1.5	0
		54.16	-23.5	-23.5	-23.5	-23	-22	-20.5	-19.5	-20.5	-21				54.16	-2	-0.5	-0.5	1	-0.5	0	0	2	2
		54.2	-23.5	-24.5	-22.5	-23.5	-21.5	-20	-19.5	-20	-23.5				54.2	-1	-1	0	1.5	0	0.5	0.5	0.5	0.5
		54.24	-22	-24	-22	-22.5	-20.5	-20.5	-20.5	-19.5	-23				54.24	0	-1	0.5	1.5	1	0.5	1	0.5	1
		54.28	-22	-24	-22.5	-21	-21.5	-21	-20	-19	-21.5				54.28	0.5	-1	0	1.5	0.5	-0.5	2	1	1.5
		54.32	-22.5	-23.5	-22.5	-21	-23	-20.5	-20	-19	-21				54.32	0	-1.5	1	1.5	-0.5	-0.5	1.5	1.5	1
		54.36	-22.5	-23.5	-21.5	-21.5	-22.5	-19.5	-20	-19	-22				54.36	0	-1.5	3	1.5	-1	0.5	1.5	2.5	1
		54.4	-23	-23.5	-23	-21.5	-22.5	-20.5	-20	-18.5	-22.5				54.4	0	-1.5	0.5	0	0	1	1	2.5	1
		54.44	-22.5	-22.5	-23.5	-22	-23	-22.5	-19.5	-19.5	-22				54.44	0	0	-2.5	-0.5	0	0.5	1.5	1	0.5
		54.48	-22.5	-22	-23	-22.5	-23.5	-23.5	-20.5	-19	-21.5				54.48	0	0.5	-3	-1	0	0	1.5	0.5	1
		54.52	-22.5	-23	-21.5	-24	-23	-22	-22.5	-19.5	-20.5				54.52	-1	-0.5	-2	-1	0.5	0.5	-0.5	1.5	1
		54.56	-22.5	-23.5	-20.5	-23.5	-22	-20	-22	-20	-19.5				54.56	-1	-0.5	-0.5	0.5	1	0.5	-1	1.5	1.5
		54.6	-22.5	-23.5	-21	-22.5	-22	-20	-22	-19	-20.5				54.6	-1	-0.5	1	1	0	1.5	-1	2.5	1
		54.64	-22	-22.5	-22.5	-21	-22	-21	-21	-18	-19.5				54.64	-1	-1	0	0.5	-0.5	1.5	-0.5	2.5	2
		54.68	-23	-23	-22.5	-21.5	-21	-22	-20	-19	-20				54.68	-1	-1	0	0	0	0.5	0.5	2.5	1
		54.72	-23.5	-23.5	-22.5	-22.5	-22	-21	-19.5	-21.5	-20				54.72	-1	-1	-0.5	-1	0	-0.5	1	1.5	1.5
		54.76	-24.5	-24.5	-23	-22.5	-22	-20	-19	-21.5	-21				54.76	-1	-0.5	-0.5	-1	0	1	0.5	1.5	1
		54.8	-25	-24.5	-23	-22.5	-22	-20.5	-19.5	-20.5	-20.5				54.8	-0.5	-0.5	0.5	-1	0.5	1.5	0	1.5	2
		54.84	-24.5	-23.5	-22.5	-22	-22.5	-21	-19.5	-20	-20				54.84	-0.5	-0.5	0	-1.5	0.5	0.5	0	1.5	2
		54.88	-23.5	-23	-23	-22.5	-22	-20.5	-20	-19.5	-18.5				54.88	-2	-0.5	-1.5	-1	0.5	0	-0.5	1	1.5
		54.92	-23	-23.5	-24	-23	-22	-20.5	-21	-19	-19				54.92	-1.5	-1	-2.5	-1	-0.5	1	-0.5	1.5	0.5
		54.96	-23.5	-24	-24	-23.5	-22	-21	-21	-19	-20				54.96	-0.5	-1	-1	-1.5	-0.5	1	0	2	1
		55	-24.5	-23.5	-24	-23	-22	-21.5	-21	-19.5	-21				55	0	-0.5	-1.5	-1	-0.5	0.5	0.5	2	1
		55.04	-24.5	-23.5	-24	-21.5	-22	-21.5	-22	-20	-20.5				55.04	0.5	0.5	-1	0	0.5	-0.5	0.5	0.5	2
		55.08	-23.5	-23.5	-24.5	-21.5	-22	-21.5	-21	-19	-20.5				55.08	0.5	0	-1.5	0.5	0.5	-1	1	0.5	1
		55.12	-22.5	-23.5	-24	-21	-21	-21	-19.5	-19	-20.5				55.12	0.5	-1	-2	2	1	0	2	0.5	0.5
		55.16	-21.5	-23.5	-23	-20.5	-21	-21	-19	-19	-22				55.16	0	-1	-1.5	1	0	0	2	0.5	-0.5
		55.2	-22.5	-23	-22.5	-21.5	-22.5	-22	-20	-19.5	-22.5				55.2	-0.5	-0.5	-2.5	-0.5	-1	-0.5	-0.5	1	0
		55.24	-23	-22	-23	-22	-22.5	-22	-21.5	-20	-22.5				55.24	-1	0.5	-2	0	-1.5	0.5	-1.5	1	0.5
		55.28	-22	-22	-22	-22	-22.5	-21.5	-21.5	-20	-22.5				55.28	0	-0.5	-0.5	0	-0.5	0	0	0.5	1.5
		55.32	-22.5	-22.5	-21.5	-22	-22.5	-20.5	-21.5	-20	-22.5				55.32	0	-1	0	0.5	-0.5	0.5	0.5	0.5	1.5
		55.36	-22	-23	-21.5	-21	-21.5	-21	-20.5	-19.5	-21				55.36	0	-0.5	-0.5	1	1	-0.5	1	0	2
		55.4	-20.5	-21	-22	-20.5	-21.5	-20.5	-19.5	-18	-20				55.4	0	0.5	0	0	1.5	-0.5	1	1	2
		55.44	-21	-22	-22	-22	-23	-21.5	-19.5	-17.5	-20				55.44	1	-0.5	0.5	-0.5	-0.5	-1.5	2	2	2
		55.48	-23	-21.5	-22	-22.5	-24	-22	-19.5	-18	-20.5				55.48	0.5	0	0	-0.5	-1.5	0	2	3	2
		55.52	-23.5	-21	-21	-22	-24	-21	-20	-19	-20.5				55.52	-1	1	1	-0.5	-1.5	1.5	1	3	2
		55.56	-24	-21.5	-22	-21	-23.5	-20	-21	-20	-20.5				55.56	-1	1	0.5	-0.5	-1.5	3	-0.5	2	1.5
		55.6	-23	-22	-22.5	-22.5	-23.5	-20	-21.5	-20	-20				55.6	-1	1	-1	-1.5	-1.5	1	-0.5	0.5	2
		55.64	-23	-22.5	-24	-23	-22.5	-20.5	-21.5	-19	-21				55.64	-1	0.5	-2.5	-2.5	-0.5	-0.5	0	-0.5	0.5
		55.68	-23	-22.5	-24	-22	-21	-20.5	-22	-18.5	-21.5				55.68	-1	-0.5	-2.5	-2	-0.5	-1	0	-1.5	1
		55.72	-22	-22.5	-24.5	-21.5	-21	-21	-22	-19	-22				55.72	0	-1.5	-2.5	-0.5	0	-0.5	0	-1	0.5
		55.76	-22	-23	-24	-22.5	-21	-21	-22	-19.5	-22.5				55.76	1	-1	-1.5	0	0	0.5	-0.5	0.5	-0.5
		55.8	-21.5	-22.5	-23.5	-24.5	-21	-21	-22	-21	-23				55.8	1	-0.5	-1.5	-0.5	1	1	-1	1	-2
		55.84	-22	-22	-22	-24.5	-21	-20.5	-20.5	-21	-21				55.84	0	0.5	0	-1.5	0	0.5	-0.5	1	0
		55.88	-23	-23	-21.5	-24.5	-23	-20	-20	-22	-20				55.88	-1	0.5	0	-2.5	-1.5	0.5	0	0.5	0.5
		55.92	-26	-24.5	-21.5	-24.5	-23.5	-20	-19.5	-22	-21				55.92	-2.5	-1	-0.5	-2	-1	0.5	1	2	0
		55.96	-24.5	-24	-23	-25	-23	-20	-19.5	-20	-21				55.96	-1.5	-1	-1.5	-2	-1.5	1	1	2	-1
		56	-23.5	-23	-23.5	-24	-21.5	-19.5	-19.5	-19	-20.5				56	-0.5	-1	-1.5	-0.5	-0.5	1	1	1.5	-0.5
		56.04	-22	-22	-22	-24.5	-20.5	-20	-19	-19	-21				56.04	0.5	-0.5	0	0	-0.5	0	1.5	1.5	0.5
		56.08	-22	-21.5	-22	-24	-20.5	-20.5	-18.5	-19.5	-18.5				56.08	0.5	-0.5	1	0	0	0	2	0.5	2
		56.12	-22.5	-21.5	-22.5	-24	-21	-22	-18.5	-22	-19				56.12	0	-0.5	1	-1	0.5	-1	1.5	-1.5	1
		56.16	-23.5	-22.5	-23.5	-25.5	-22	-23	-18	-21.5	-20.5				56.16	-0.5	0	1	-1.5	0.5	-1	1.5	-1.5	1
		56.2	-23	-23.5	-23.5	-25	-22	-22.5	-18	-20.5	-21.5				56.2	0	0	0.5	-1.5	0.5	-1.5	2	0.5	1
		56.24	-22.5	-24	-23	-24.5	-21.5	-21.5	-19.5	-20	-22				56.24	0.5	0	0	-1.5	1	-2	1.5	2	0
		56.28	-22.5	-23	-23.5	-24	-22	-20.5	-22	-20.5	-22.5				56.28	0.5	0	-1.5	-1.5	0	-1	0.5	1.5	-1.5
		56.32	-22.5	-24.5	-23.5	-23	-21.5	-20.5	-21.5	-20.5	-22				56.32	0.5	0	-2	-1.5	-0.5	0	-0.5	1	-1
		56.36	-22.5	-25	-22.5	-22.5	-21.5	-20.5	-22	-21	-21				56.36	0.5	-1	-1	-1	-0.5	0.5	-0.5	-0.5	0.5
		56.4	-22	-24.5	-21.5	-21.5	-20.5	-20.5	-22.5	-22	-19				56.4	0.5	-0.5	1	0	0.5	0.5	-0.5	-1	2.5
		56.44	-23	-23	-21	-21.5	-21.5	-19.5	-21.5	-21.5	-18.5				56.44	-1	0.5	0.5	0	0.5	0	0.5	-1.5	3.5
		56.48	-23	-22.5	-21.5	-22.5	-23	-19.5	-19	-20	-20				56.48	-1	0	-0.5	0.5	0	0	1.5	-0.5	3
		56.52	-23.5	-21.5	-22	-23	-23	-19.5	-18.5	-17.5	-21.5				56.52	-0.5	0	-0.5	-0.5	0	1	1	1.5	2.5
		56.56	-23	-22.5	-22.5	-23	-21.5	-19.5	-19.5	-18	-20				56.56	-0.5	0	-1	-1	0	0.5	-0.5	2	2.5
		56.6	-24	-23	-24	-23.5	-21	-19	-20	-19	-19.5				56.6	-1	0	-1.5	-0.5	0.5	0.5	-1	2.5	2.5
		56.64	-25.5	-22	-23	-23	-22	-20	-21	-19.5	-20				56.64	-1	0.5	-1	-0.5	0.5	0	-1	2.5	2.5
		56.68	-24.5	-21.5	-22.5	-23	-22.5	-21	-21	-20	-21				56.68	-0.5	0	0.5	0	1	0.5	-1.5	2.5	1
		56.72	-24	-22	-23.5	-24	-23	-21	-21	-20.5	-20.5				56.72	0	0.5	0.5	-0.5	1	1.5	-0.5	1.5	1.5
		56.76	-23.5	-22.5	-24	-23.5	-22.5	-21.5	-20	-20	-20.5				56.76	-1	1	-1	-0.5	-0.5	1	1	1.5	1.5
		56.8	-22	-22.5	-25.5	-23	-22.5	-22	-20	-19.5	-21				56.8	-0.5	-0.5	-2	-0.5	-2	-0.5	1	1.5	0.5
		56.84	-22	-21	-25	-23	-22.5	-22.5	-21	-20	-22				56.84	0	-0.5	-2	0	-1	-1	1	1	0
		56.88	-22.5	-19.5	-23.5	-23	-22	-22.5	-21.5	-20.5	-21				56.88	0.5	0.5	-1	0.5	0.5	-1	0.5	0	0
		56.92	-22.5	-21	-22	-22.5	-21.5	-21.5	-22	-20.5	-20				56.92	0	0	1.5	1	0.5	1	0	-1	1
		56.96	-22.5	-22.5	-21.5	-22	-20.5	-20	-21.5	-20.5	-21.5				56.96	-0.5	0	1.5	1	0.5	2.5	-1	-1	2
		57	-21.5	-24	-21	-22	-20	-20	-21	-20.5	-22				57	0.5	0	1.5	1.5	1	2.5	-1.5	0	2
		57.04	-21	-23.5	-22	-22.5	-21.5	-21	-21	-21	-21				57.04	2	0	0	0.5	0	1	0	0	2
		57.08	-22.5	-22	-23	-22.5	-23	-22	-20.5	-22	-20.5				57.08	1	0.5	-2	-1	-1	1	2	0.5	1.5
		57.12	-23.5	-21.5	-23	-23.5	-23	-21	-19.5	-21.5	-21				57.12	0	0.5	-2	-2	-0.5	0.5	2.5	1	2
		57.16	-25	-21	-22.5	-24	-22.5	-20	-20	-20	-22				57.16	-1.5	1.5	-0.5	-2	0	0.5	1	2.5	2
		57.2	-24	-21.5	-22	-24	-22	-20	-21	-20	-22				57.2	-2.5	1	0	0	0	-0.5	0	1.5	1.5
		57.24	-23	-21.5	-21.5	-23.5	-21.5	-21	-21	-21	-21.5				57.24	-2.5	1	0.5	0	0	-1	0	0.5	1
		57.28	-22	-23	-21.5	-23.5	-22	-20	-20	-21.5	-21.5				57.28	-1.5	0.5	0.5	-0.5	0	0	0.5	0	0
		57.32	-22.5	-25	-22	-24	-22	-19	-21	-19.5	-22.5				57.32	-1	-0.5	0.5	-1	0.5	1	-0.5	0.5	-1
		57.36	-23	-25.5	-22	-23	-22.5	-20	-21.5	-19	-22.5				57.36	0.5	-1	1	0	0.5	1.5	-1	1	-0.5
		57.4	-22	-23.5	-21.5	-23.5	-22.5	-19	-20	-19	-22.5				57.4	1.5	1.5	0.5	-1	0.5	2.5	-0.5	1	0
		57.44	-22.5	-22	-22	-23.5	-23	-18.5	-20	-20	-22				57.44	2	2	0	-1	0.5	2.5	-0.5	0.5	1
		57.48	-23.5	-20	-21	-23.5	-22	-20.5	-20.5	-20	-22.5				57.48	0.5	2.5	-0.5	-1	0.5	0.5	0	0	1
		57.52	-24	-21.5	-21.5	-24	-20.5	-21.5	-21.5	-21.5	-20.5				57.52	0	1.5	-0.5	-1	1.5	-1.5	-0.5	0	2
		57.56	-22.5	-23.5	-22.5	-24	-20	-21.5	-21.5	-21.5	-21				57.56	0	0	-0.5	-1	1.5	-0.5	0	0	3
		57.6	-22	-23.5	-22.5	-23	-21	-21.5	-22	-22.5	-21				57.6	0	-1	-0.5	0	1.5	0	0	-0.5	3.5
		57.64	-22	-23	-22.5	-22.5	-20.5	-22.5	-22	-21.5	-20.5				57.64	0	-1.5	-0.5	1	1	0	1	0.5	3.5
		57.68	-22	-23	-23	-21	-20	-22.5	-22	-21.5	-20				57.68	1.5	-0.5	-0.5	1.5	1	0.5	0.5	-0.5	3.5
		57.72	-23	-24	-23	-21	-20.5	-23	-21.5	-21.5	-20				57.72	0.5	0	-1	1.5	0.5	1	0	0	2.5
		57.76	-25	-25	-22.5	-21	-21	-24	-20.5	-21	-21				57.76	-1.5	-0.5	-1	1	0.5	0.5	-0.5	0.5	1.5
		57.8	-24	-25	-22	-21	-21	-23	-20	-19.5	-22.5				57.8	-1.5	-1	-0.5	0.5	-0.5	0	0	1.5	0.5
		57.84	-24	-25	-23.5	-21.5	-21	-21	-20	-19	-22.5				57.84	-1.5	-1	-1.5	0	0	-0.5	0.5	2	0.5
		57.88	-23.5	-24	-23.5	-22.5	-21.5	-21.5	-19.5	-19	-22.5				57.88	-1.5	-0.5	-2	0.5	1	0	1.5	1.5	0
		57.92	-23.5	-23.5	-23	-23.5	-22	-21.5	-19.5	-19	-23				57.92	-1	0	-0.5	-0.5	0	0.5	1	1	0.5
		57.96	-23.5	-23	-23	-25	-23	-21.5	-20	-19	-22				57.96	-1	0	0	-2.5	-0.5	0.5	0	0.5	1.5
		58	-22.5	-22.5	-23.5	-24	-22.5	-21.5	-20	-19	-19				58	0	1	0	-1.5	-1	1	0	0	2.5
		58.04	-22	-23.5	-23.5	-23.5	-22	-21	-19.5	-19.5	-18.5				58.04	0.5	0.5	-0.5	-1	-0.5	1.5	1	0	3
		58.08	-22	-23	-24	-23	-22.5	-21	-19	-19	-19.5				58.08	1	0.5	-2	-0.5	0	1.5	2	1.5	2
		58.12	-21.5	-23	-23	-22.5	-21	-21.5	-18.5	-19	-20				58.12	1.5	0	-2.5	0	1	0.5	3	2	1.5
		58.16	-21.5	-22.5	-22.5	-22.5	-22	-21.5	-19	-19.5	-19.5				58.16	1	-0.5	0	0.5	0.5	0.5	3	1	2.5
		58.2	-23	-23.5	-22	-22.5	-23.5	-21.5	-19.5	-21	-19.5				58.2	0	-1.5	0	0.5	-0.5	0	3	1.5	2.5
		58.24	-24	-24	-21.5	-23.5	-23	-21.5	-20.5	-20.5	-20				58.24	-1.5	-1.5	0	0	-0.5	-0.5	2.5	2	3.5
		58.28	-23.5	-24	-21.5	-22.5	-21.5	-23	-22	-21.5	-21				58.28	-1.5	-1	-0.5	0.5	-0.5	-1	1.5	1	1.5
		58.32	-23.5	-24.5	-21	-22.5	-22	-23	-21.5	-21	-21.5				58.32	-1.5	-1	-1	1.5	-0.5	-1	1	0.5	1
		58.36	-22.5	-23.5	-21	-23	-22.5	-22	-19	-20	-22				58.36	0.5	0	-1	1.5	-0.5	0	2	-0.5	1
		58.4	-21.5	-22.5	-21.5	-23	-22.5	-22	-19	-20.5	-21.5				58.4	2	0.5	-1	1.5	-0.5	-0.5	1.5	-1	2
		58.44	-21	-23.5	-22.5	-23	-22	-21	-20	-20	-22				58.44	1.5	-1	-2	1.5	0.5	-0.5	0.5	1	2
		58.48	-21.5	-23.5	-21.5	-22.5	-22.5	-20.5	-20.5	-18.5	-20.5				58.48	0	-2.5	-1.5	1	1	1	0	3	2.5
		58.52	-22.5	-23.5	-22.5	-22.5	-22.5	-19.5	-19.5	-18	-21.5				58.52	-0.5	-2	-1.5	-1	1	2	0	2.5	1
		58.56	-23.5	-23	-22.5	-23.5	-22	-21	-19	-17.5	-22.5				58.56	-0.5	-1	-0.5	-1	0	0.5	-0.5	1.5	-0.5
		58.6	-24	-24	-22	-23	-21.5	-21.5	-20	-17.5	-23.5				58.6	-0.5	-1	0.5	0	0.5	0.5	0	1	-2
		58.64	-24.5	-24.5	-21.5	-22.5	-21.5	-22	-20	-18	-23.5				58.64	0	-1.5	0.5	0.5	1.5	0	0.5	1	-0.5
		58.68	-23.5	-25	-21.5	-23	-20.5	-22.5	-21.5	-17.5	-24				58.68	0	-1	0	0	2	0	0	2	0.5
		58.72	-24.5	-25.5	-21.5	-22.5	-20.5	-22.5	-22	-17.5	-23				58.72	0	-1	-0.5	0	1	1	0	2	1
		58.76	-24	-25	-22	-22	-21	-21.5	-21	-17	-23				58.76	0	-2.5	-1	-1	0	1	1	1.5	1.5
		58.8	-22	-24	-21.5	-23	-21.5	-21	-20.5	-18	-21.5				58.8	0.5	-2	1	-1.5	0	1	1.5	1.5	2
		58.84	-21.5	-23.5	-21.5	-24	-22.5	-19.5	-19.5	-19	-21.5				58.84	1	-0.5	1.5	-1	0	1.5	2	1	2
		58.88	-21	-23.5	-22	-24	-23	-20.5	-19	-20	-21.5				58.88	2	-0.5	1	0	-0.5	0.5	2.5	1.5	2
		58.92	-22.5	-24	-22.5	-23.5	-23	-20	-19.5	-19	-22.5				58.92	1.5	-0.5	0.5	0	-1.5	0.5	2	2	1.5
		58.96	-23.5	-25	-23	-23.5	-23	-18.5	-20.5	-20	-21.5				58.96	0.5	-1	-1	0	-0.5	1	0.5	0.5	3
		59	-24	-25	-23.5	-23.5	-23	-18.5	-21.5	-20.5	-20.5				59	-1	-1.5	-2.5	0	0	1.5	0	0	2.5
		59.04	-23.5	-25.5	-23	-22.5	-22	-19	-22	-20.5	-19				59.04	-1	-1.5	-2	0	-0.5	2	-0.5	-0.5	4
		59.08	-23.5	-24.5	-23	-23	-21	-20	-20	-20.5	-20				59.08	-1.5	-2	-2	0	-0.5	1.5	-1	-1.5	3
		59.12	-23	-23	-22	-23.5	-21	-21	-18	-20.5	-20				59.12	-2	-1.5	-1	0	0	0	0	-2	2
		59.16	-23.5	-23.5	-21	-23.5	-20	-20.5	-18	-20	-20.5				59.16	-2	-1	0	0	0.5	0	1.5	-0.5	1
		59.2	-23.5	-24	-21	-23	-20.5	-21.5	-19.5	-19.5	-21				59.2	0	-2	-0.5	0	0.5	-0.5	1	1.5	0.5
		59.24	-23.5	-23.5	-22	-23	-21.5	-22.5	-21	-19.5	-22				59.24	0	-1	-1.5	0.5	0.5	0.5	1	1	1
		59.28	-23	-23.5	-23	-23.5	-23	-22.5	-20.5	-19.5	-22				59.28	-0.5	0	-2	1	0	1	2.5	1	1
		59.32	-22.5	-24.5	-24	-24	-23.5	-21	-20	-20.5	-22				59.32	0	-0.5	-3	0.5	-0.5	1	3	0.5	1.5
		59.36	-23.5	-26	-23	-23	-23	-21	-20.5	-19	-23				59.36	-1	-1	-2.5	0.5	-1.5	0.5	2.5	1.5	1.5
		59.4	-23	-25	-22	-23.5	-23	-21	-21	-18.5	-22.5				59.4	-1	-1	-1.5	1.5	-1.5	0	0.5	1.5	1.5
		59.44	-24	-23.5	-21.5	-24	-22.5	-21.5	-20	-18	-21				59.44	0	-1	-1.5	1	-1	0.5	-0.5	2	1.5
		59.48	-25	-24	-21.5	-24	-22.5	-22.5	-19	-19.5	-20.5				59.48	0	-1.5	-1.5	-0.5	-0.5	0.5	-0.5	0	1.5
		59.52	-24	-24	-20.5	-23.5	-23	-22.5	-19	-20.5	-19				59.52	-1	-2	-0.5	0	-1	1	0	-1	1.5
		59.56	-23	-24	-21.5	-23.5	-22	-21.5	-20	-20.5	-19.5				59.56	-1.5	-2	-1.5	0	-1	0.5	0	-0.5	1.5
		59.6	-23.5	-24.5	-21.5	-23.5	-20.5	-21	-19.5	-19.5	-19.5				59.6	-1	-3	-1	0.5	0	0.5	0.5	0.5	2.5
		59.64	-23	-25	-22	-23	-21	-20.5	-19.5	-19.5	-21				59.64	0.5	-3	-1	1.5	0	1.5	1.5	0	1.5
		59.68	-23.5	-24.5	-20.5	-23.5	-21	-21.5	-20	-19	-21				59.68	1	-2	-0.5	1.5	-0.5	1	2	0.5	2.5
		59.72	-24.5	-24.5	-20.5	-23	-21.5	-22	-20	-18.5	-21.5				59.72	0.5	-1	0	0.5	0	0.5	2	0	2
		59.76	-23.5	-25	-22	-23.5	-22	-21.5	-20.5	-19	-21.5				59.76	0.5	-1.5	0.5	0	0	0.5	0.5	0	2
		59.8	-22	-24	-22.5	-23	-21.5	-21.5	-22	-20	-22.5				59.8	1	-1.5	1	0.5	0.5	0.5	0	0	1
		59.84	-22	-23.5	-22	-21.5	-23.5	-21.5	-22	-21	-21				59.84	1	-1	0.5	0	-1	0	2	0	1.5
		59.88	-21.5	-24	-23	-22	-23.5	-20.5	-22	-19.5	-21				59.88	1	-1	-0.5	-0.5	-1	0.5	2.5	0.5	1
		59.92	-22.5	-24.5	-24	-23.5	-22.5	-20	-21.5	-18	-19.5				59.92	-0.5	-0.5	-1	-1	-1	1	0.5	1.5	1.5
		59.96	-23	-25	-21.5	-24	-22	-20.5	-21	-18	-19				59.96	-1.5	-1.5	0.5	-0.5	-0.5	1.5	-0.5	0.5	1
		60	-23	-24.5	-20	-24	-21.5	-20.5	-20.5	-19	-19.5				60	-0.5	-1.5	0.5	0	-0.5	1.5	-1	-1.5	1.5
		60.04	-22.5	-24.5	-21	-23.5	-21	-21	-20	-19.5	-20				60.04	0	-2.5	0	1	0	1.5	-0.5	-2	0.5
		60.08	-23	-24.5	-21.5	-23	-20	-21.5	-20	-19.5	-21				60.08	0	-2.5	0	0.5	1	1.5	0	-1	0.5
		60.12	-23	-24.5	-22	-23	-20.5	-21	-20	-18.5	-21.5				60.12	-0.5	-1.5	-0.5	0	0	2	0	1	1.5
		60.16	-24	-25	-22.5	-23	-21	-21	-20.5	-18	-21				60.16	0	-1	-1.5	-0.5	-0.5	1	0.5	1	2.5
		60.2	-24.5	-25.5	-22	-23	-21.5	-21	-21.5	-18	-21.5				60.2	0.5	-2	-1.5	0	-1	0	0.5	0.5	2
		60.24	-24	-24.5	-22.5	-23	-22	-21.5	-21	-17.5	-20				60.24	0.5	-2	-1.5	-0.5	0	0	0.5	0.5	2
		60.28	-24.5	-23.5	-23	-23	-21.5	-22	-21	-17.5	-20				60.28	-0.5	-0.5	-1.5	0	1	-0.5	0	1	1.5
		60.32	-23	-22.5	-23.5	-23	-21	-21.5	-20.5	-17	-20				60.32	0	0	-1.5	2	1.5	0.5	0.5	2	2.5
		60.36	-22.5	-22.5	-23.5	-23	-21	-21	-20	-17.5	-20				60.36	0	0.5	-1.5	1	1.5	2	0.5	1	2.5
		60.4	-24	-22.5	-22	-24	-21.5	-21	-20	-18.5	-20.5				60.4	-0.5	0.5	0	0	1.5	2	0.5	0.5	2
		60.44	-24	-23	-22	-23.5	-20.5	-21	-19.5	-19	-20.5				60.44	0	-0.5	0	-1	2	1.5	2	0.5	2
		60.48	-24	-23.5	-22.5	-23.5	-21	-20	-20.5	-20	-20.5				60.48	0.5	-0.5	0	-3	0.5	1.5	3	0.5	1
		60.52	-23.5	-24	-22	-22	-22.5	-22	-20.5	-20.5	-21.5				60.52	1	-0.5	2	-2	-1.5	0	3.5	-1	0.5
		60.56	-23.5	-23.5	-22	-21	-23	-23.5	-21	-20.5	-20				60.56	0.5	0.5	1	0	-2	-1	3	-1	1
		60.6	-23.5	-24	-21.5	-21	-22.5	-22	-21.5	-20.5	-19				60.6	-0.5	1.5	-1	1	-1	0	0.5	-0.5	2
		60.64	-23	-24.5	-21	-21	-23.5	-20	-21.5	-20	-19				60.64	-0.5	0.5	-1.5	0.5	-1	2.5	0	0	2.5
		60.68	-23.5	-24.5	-21.5	-21.5	-23.5	-19.5	-21	-20.5	-21				60.68	-1	-1	-1.5	0	-1.5	2.5	1	-1	2
		60.72	-23	-24	-22	-22.5	-23.5	-19.5	-20.5	-19	-21.5				60.72	-1	-2	-1.5	0	-1	1.5	2	0.5	1.5
		60.76	-24	-23.5	-23	-22.5	-22.5	-20.5	-20	-18	-22.5				60.76	-1.5	-2	-0.5	0.5	0	0	2	1	0.5
		60.8	-24.5	-24	-22.5	-21	-21.5	-20	-19.5	-18	-22				60.8	-1.5	-2.5	0.5	2	1.5	1	1	0.5	0
		60.84	-25	-25	-23	-21	-21	-20	-19.5	-19.5	-21.5				60.84	-1	-1.5	-0.5	1	1	1.5	0.5	1	0.5
		60.88	-25	-26	-23	-21	-22	-21.5	-19.5	-19.5	-20				60.88	0	-0.5	0	1	0	1	0.5	1	2
		60.92	-24.5	-25.5	-22	-22	-22.5	-21.5	-20	-18	-19.5				60.92	-0.5	0	1	0	-1	1	0.5	1.5	1
		60.96	-24.5	-24	-22.5	-23	-22.5	-20.5	-19.5	-17.5	-20.5				60.96	0	-1	0	-1	-0.5	2	1.5	2.5	0.5
		61	-24	-23.5	-22.5	-23.5	-22	-21	-19.5	-19	-20				61	0	-1.5	-0.5	-1	0	2	2	1	1.5
		61.04	-23	-24.5	-23	-23.5	-21.5	-21.5	-21	-19	-20				61.04	-0.5	-2.5	-1	-1	0	1.5	0	1	1.5
		61.08	-24	-24	-22	-22.5	-21.5	-21	-22	-19.5	-20				61.08	-1.5	-2.5	0	0.5	0.5	2	0	0.5	2
		61.12	-25	-23	-24	-21.5	-21.5	-21	-22.5	-20	-19				61.12	-1.5	-0.5	-1.5	1	-0.5	2	-2	0.5	3
		61.16	-24.5	-23.5	-24.5	-22	-22.5	-22	-22	-21	-18.5				61.16	-1.5	-0.5	-2	1	-1	1.5	-1.5	-1.5	4
		61.2	-23	-24.5	-23.5	-21.5	-22	-21.5	-20.5	-21	-20				61.2	-1	-1	-1	1	-1	1	0.5	-1	3.5
		61.24	-21.5	-24	-22.5	-21.5	-21	-20.5	-20	-19	-20.5				61.24	0	-1	-0.5	0	-0.5	1	1.5	1	2
		61.28	-21.5	-23.5	-21.5	-21.5	-21	-21	-20.5	-18	-21.5				61.28	0	-1.5	0.5	0	0.5	0.5	1.5	1.5	0
		61.32	-22.5	-23.5	-21.5	-21	-22.5	-21	-21	-19	-20.5				61.32	-1	-1.5	0.5	1	-0.5	0.5	2	1	1.5
		61.36	-23	-24	-22.5	-23	-23	-21	-20.5	-20	-20				61.36	-1.5	-0.5	0	0	-0.5	0	1.5	0.5	2
		61.4	-23.5	-23.5	-22.5	-22.5	-22.5	-21.5	-20	-19	-19.5				61.4	-1	-0.5	-0.5	1	0.5	0	1.5	1	2
		61.44	-22.5	-23.5	-22	-22	-21.5	-21.5	-20	-18	-18.5				61.44	-1	-1.5	-0.5	1	0.5	1	1	2	2
		61.48	-23	-23.5	-21.5	-21.5	-21.5	-21.5	-20	-18	-19.5				61.48	-0.5	-1.5	0.5	1.5	0	1	0.5	1.5	1.5
		61.52	-24	-24	-21	-22	-23	-22	-20.5	-18	-19.5				61.52	-0.5	-1	1	1	-0.5	-0.5	-0.5	1.5	3
		61.56	-24	-24	-22.5	-21	-22.5	-21.5	-22.5	-18.5	-19				61.56	-1.5	-0.5	-1	0	-0.5	-0.5	-1	0.5	3.5
		61.6	-23	-25	-23	-20.5	-22	-20.5	-21.5	-19	-18				61.6	-1	-1	-1.5	1	-0.5	0	-0.5	0	4
		61.64	-22.5	-24.5	-22.5	-22.5	-22	-20.5	-20	-17.5	-18.5				61.64	-1	-1	-2	0.5	0	0.5	0.5	-0.5	4
		61.68	-22	-23.5	-22	-23.5	-21	-21	-18.5	-18	-19.5				61.68	-0.5	0	-2	0	-1	0.5	2	0	4
		61.72	-23	-23.5	-22.5	-23.5	-21	-21	-19	-19	-20				61.72	-1	0.5	-0.5	-0.5	-2	1	0.5	0	3.5
		61.76	-22	-23.5	-23	-22.5	-21.5	-21	-20.5	-20.5	-20				61.76	0	0	1	-0.5	-2	1.5	-0.5	-0.5	3
		61.8	-20.5	-24.5	-23	-23.5	-21.5	-20.5	-21	-19.5	-21.5				61.8	1.5	-1	1.5	-1.5	0	2	-0.5	0.5	2
		61.84	-20	-24.5	-23.5	-22.5	-21.5	-20	-22	-18.5	-22.5				61.84	2	-1	0	-0.5	0.5	2	1	2	1
		61.88	-21.5	-23.5	-24	-23	-21.5	-21	-21	-19	-23				61.88	0	1	-0.5	0.5	0	1	1	2.5	1.5
		61.92	-23	-23	-23.5	-23.5	-22	-22.5	-20.5	-19.5	-22.5				61.92	0	1	1	1	-0.5	0	1.5	1.5	2
		61.96	-23.5	-22.5	-23	-23.5	-22	-21	-21	-20	-21				61.96	1.5	0.5	1.5	0	0	1.5	0	1	2.5
		62	-24	-22	-21.5	-23	-21.5	-20.5	-20.5	-20.5	-20				62	0.5	1	2	0	-0.5	1.5	0.5	0.5	2.5
		62.04	-23	-22	-22	-23	-21	-21.5	-20	-19	-20				62.04	1.5	1.5	0.5	0.5	0	0	1.5	1.5	3
		62.08	-23.5	-23	-23.5	-22.5	-22	-22.5	-21.5	-17.5	-19.5				62.08	0.5	0.5	0.5	0	1	-1	0.5	2	3.5
		62.12	-23.5	-24	-23	-21	-22.5	-22	-22	-16.5	-18.5				62.12	0.5	-0.5	1	1	0.5	-1.5	0	2.5	5
		62.16	-23.5	-24	-23.5	-21	-21.5	-22	-21.5	-16	-19.5				62.16	0.5	-1	1	1.5	-0.5	-0.5	-0.5	3	3.5
		62.2	-23	-24	-24	-22.5	-21	-22	-20	-17	-20.5				62.2	1	-1	-0.5	0.5	1	0.5	0.5	3	2
		62.24	-22.5	-24	-23	-23.5	-20.5	-22	-19.5	-18	-21				62.24	1	0	-1	0	1.5	0.5	1.5	1.5	2.5
		62.28	-22.5	-24.5	-23.5	-24.5	-21	-21.5	-20	-18.5	-20				62.28	0.5	-0.5	-2	-1.5	0.5	-0.5	1.5	1	2.5
		62.32	-22.5	-23	-22.5	-23.5	-21	-22.5	-19.5	-18.5	-20.5				62.32	0	0.5	-0.5	-1	0.5	-0.5	1.5	0.5	1.5
		62.36	-22.5	-23	-22.5	-23.5	-21.5	-21.5	-20.5	-19.5	-20.5				62.36	-0.5	0	0.5	-1	-1	0	0.5	0.5	1.5
		62.4	-23	-23	-22.5	-24.5	-21.5	-21.5	-21	-20.5	-20				62.4	1	0	0	0	-0.5	1.5	0	0.5	2
		62.44	-23	-23.5	-23.5	-24	-20.5	-21.5	-20	-21.5	-20				62.44	1	0.5	-0.5	-0.5	-0.5	2	0.5	-0.5	1.5
		62.48	-23.5	-25	-23.5	-23	-20	-21	-19.5	-20.5	-20.5				62.48	1	0	-1.5	-0.5	-1	1	1.5	0	2
		62.52	-23	-25	-24	-22.5	-21.5	-20.5	-19.5	-19	-20				62.52	0	-0.5	-1	0	-1	0.5	1.5	0.5	2.5
		62.56	-22.5	-23.5	-23	-22.5	-21.5	-22	-20	-17.5	-20				62.56	0	-0.5	0.5	-0.5	0	0	0.5	1.5	1.5
		62.6	-23	-23.5	-22.5	-22.5	-22.5	-22.5	-20	-18	-20				62.6	-0.5	-1	0	0.5	-0.5	-0.5	0	1.5	1
		62.64	-24	-24.5	-21.5	-24	-22	-22.5	-20	-19.5	-19.5				62.64	-1	-1	-1	-0.5	-1	0.5	0	0	2.5
		62.68	-24.5	-24.5	-21.5	-24	-22	-21	-21	-19.5	-20				62.68	-1.5	-1	-0.5	-0.5	-1	1.5	0.5	0.5	3
		62.72	-25	-24	-21	-22	-21	-21	-22	-20	-20.5				62.72	-1.5	0	0.5	1	-0.5	1.5	1	0.5	2
		62.76	-23.5	-23	-20.5	-22	-20	-22.5	-22	-20	-20.5				62.76	-0.5	0	1.5	0.5	0.5	0.5	0	1	1
		62.8	-23.5	-22.5	-21	-22	-20.5	-24.5	-22	-19	-21				62.8	0	1	2	0	1	0.5	-0.5	0.5	1.5
		62.84	-23	-22	-22.5	-22	-20.5	-24	-21	-18.5	-19.5				62.84	0	1	0.5	0.5	1	0.5	-0.5	-0.5	3
		62.88	-22	-21.5	-23	-23	-21	-23	-20	-20	-20				62.88	0.5	1	-0.5	-0.5	0.5	0.5	0	-2	3
		62.92	-21	-22.5	-23	-24	-21	-22.5	-19	-20.5	-21.5				62.92	2	0	-1	0.5	-1	0	-0.5	-2.5	1.5
		62.96	-21.5	-22.5	-23.5	-24	-21	-22.5	-19	-20	-22.5				62.96	2	0	0	1.5	-2	-1	0	-1.5	-0.5
		63	-22	-23	-25	-23.5	-22	-22	-19.5	-19	-22.5				63	0.5	-0.5	-1	1.5	-2.5	-1	1	0	-0.5
		63.04	-23.5	-23.5	-24	-23.5	-23.5	-23	-20	-19	-22				63.04	0.5	0	-0.5	1.5	-3.5	-0.5	1	1	0.5
		63.08	-24	-22.5	-24	-23	-23.5	-22.5	-20.5	-18.5	-22				63.08	0.5	1	-0.5	0	-3	0	0.5	1	1.5
		63.12	-25	-21.5	-23	-22	-22	-21	-21	-18.5	-22				63.12	-0.5	1.5	0	0	-2.5	1	-0.5	1	1
		63.16	-24.5	-23	-22.5	-22.5	-21.5	-20.5	-21	-18.5	-22				63.16	0.5	-0.5	0	-0.5	-1	1	-1	1.5	-0.5
		63.2	-24.5	-24	-22	-22.5	-21.5	-20.5	-19.5	-17	-20.5				63.2	1	0	-0.5	-1	-1	-0.5	0	3.5	-0.5
		63.24	-23	-24	-21	-22	-22	-20.5	-19	-17.5	-19.5				63.24	1.5	0.5	0	-0.5	-1	-0.5	0	3.5	1.5
		63.28	-23	-23.5	-22	-22	-23	-21	-19.5	-18	-20				63.28	2	1	0.5	1	-1.5	-0.5	0	2	2
		63.32	-23	-22.5	-23	-21.5	-21	-22	-20	-19	-19				63.32	1.5	2	0	1.5	-0.5	-0.5	0.5	1.5	2.5
		63.36	-24	-23.5	-24	-22	-20.5	-23.5	-21	-18	-20				63.36	1	1	0	0.5	-0.5	-1	0	1	2.5
		63.4	-23.5	-24.5	-24	-23.5	-20.5	-22.5	-21.5	-17.5	-21				63.4	1	0.5	0	-0.5	0	0	0.5	1	2
		63.44	-22.5	-24	-22.5	-23.5	-21.5	-21	-20.5	-19.5	-21				63.44	0.5	0.5	1.5	-0.5	-1.5	-0.5	0	0	1.5
		63.48	-23	-23.5	-22.5	-23	-22.5	-19.5	-21	-20	-21				63.48	-1	-1	1.5	-0.5	-2.5	0.5	-0.5	0.5	2.5
		63.52	-22.5	-22.5	-23	-23.5	-22.5	-21	-21.5	-19	-22				63.52	-1	0.5	0.5	-0.5	-2	1.5	-0.5	1.5	2
		63.56	-23.5	-22.5	-24.5	-23	-21	-21.5	-23	-19	-23.5				63.56	-2	1	-1	-0.5	-1	1.5	-0.5	1.5	0.5
		63.6	-23.5	-22.5	-25	-23.5	-19.5	-21	-23	-19.5	-23.5				63.6	-2.5	1.5	-1.5	-0.5	-0.5	1	-1.5	1	1.5
		63.64	-22	-21.5	-23.5	-23	-19.5	-20.5	-21.5	-19.5	-22.5				63.64	-0.5	2.5	-1.5	0.5	-1	1	0	1	2
		63.68	-22	-22	-22	-22	-20	-21	-19.5	-20	-22				63.68	0.5	3	-0.5	1	-0.5	1.5	-0.5	1	2.5
		63.72	-22.5	-22.5	-21	-21.5	-19.5	-21.5	-19.5	-20	-20				63.72	0	3	2	1	-0.5	1	0.5	1.5	4
		63.76	-23	-22	-22	-23	-19.5	-21.5	-20.5	-19	-21				63.76	0	1	2	0	-1.5	0	1	1.5	2.5
		63.8	-24	-23	-23	-23	-20	-21	-21.5	-18.5	-21.5				63.8	-1	0	0.5	0.5	-1	0	0.5	3	1.5
		63.84	-25	-23.5	-23	-22.5	-20.5	-21.5	-21.5	-19.5	-22.5				63.84	-1.5	-1	-0.5	0	-0.5	0.5	1	2.5	1.5
		63.88	-25	-23.5	-24.5	-21.5	-20.5	-22	-21.5	-18.5	-21.5				63.88	-1.5	-1.5	-1	-0.5	-1.5	2	0.5	2.5	2
		63.92	-23	-23.5	-24.5	-22.5	-20.5	-22	-20	-18.5	-20.5				63.92	-1.5	-1.5	-1	-1.5	-1.5	1.5	0.5	1.5	1.5
		63.96	-23	-22	-24	-22	-21.5	-22	-20.5	-18.5	-20				63.96	-1.5	-0.5	-1.5	-1.5	0.5	1.5	-0.5	2	1.5
		64	-23.5	-21	-23	-22.5	-22	-21	-21.5	-19	-21.5				64	-1.5	0.5	-0.5	-1.5	1	2	-1	2	1
		64.04	-23.5	-22.5	-23	-22	-21	-20	-22	-18	-22				64.04	-0.5	1	0	0	0.5	1.5	-1	1.5	1
		64.08	-22.5	-23	-22.5	-22	-21	-20.5	-22.5	-17	-22.5				64.08	1.5	1.5	0.5	0.5	-1.5	1	-1.5	1.5	2
		64.12	-21.5	-22.5	-22.5	-21.5	-20.5	-20.5	-22.5	-18	-22				64.12	1.5	2.5	0.5	0	-0.5	0.5	-1	2.5	2.5
		64.16	-21.5	-23	-22	-23.5	-20	-21	-21.5	-20.5	-22				64.16	1.5	1.5	1	-0.5	-0.5	-0.5	0	2	2
		64.2	-22	-23.5	-22.5	-22.5	-20.5	-21.5	-22	-21	-22				64.2	0.5	0	-0.5	0	-1	-0.5	0	2	1.5
		64.24	-24	-23.5	-22	-22	-23	-22.5	-21.5	-20.5	-21.5				64.24	-1	0	0	-0.5	-3	0	0	1	1.5
		64.28	-25.5	-23	-22	-21.5	-21.5	-24	-21.5	-20	-21.5				64.28	-2.5	1	0.5	0	-2	0	0	0.5	0.5
		64.32	-25	-24	-21	-22.5	-20.5	-24.5	-21.5	-19.5	-20				64.32	-1.5	0.5	1	-0.5	-1	0	0.5	0.5	1
		64.36	-25.5	-23	-20.5	-23	-20	-24.5	-22	-19.5	-19				64.36	0	0.5	1.5	0.5	0	-0.5	0.5	1	2
		64.4	-25.5	-22	-21.5	-23.5	-19.5	-22.5	-22.5	-19.5	-21				64.4	-0.5	0	2	0	0.5	0.5	0.5	1.5	1.5
		64.44	-25.5	-22	-21.5	-22.5	-20	-21	-22.5	-19	-22				64.44	-2	0	2.5	-0.5	-0.5	2.5	0.5	1	1
		64.48	-23	-23	-21.5	-21	-21	-20	-20.5	-19.5	-23				64.48	-1	0	1.5	-0.5	-1.5	3	1.5	1	1
		64.52	-21.5	-24	-22.5	-19.5	-22	-20.5	-19	-19	-22				64.52	-1	-0.5	0	0	-1	2.5	1.5	1.5	1
		64.56	-23	-23.5	-23	-20.5	-22	-21.5	-20	-20	-21				64.56	-1	-0.5	0.5	0	-0.5	1	1	1	1.5
		64.6	-24.5	-23.5	-23	-21.5	-20.5	-22.5	-21.5	-19	-22.5				64.6	-1.5	-1	0	0	-1	-1	-0.5	2	0.5
		64.64	-25	-22.5	-22.5	-21.5	-21	-23	-20	-19.5	-23				64.64	-1.5	0	0	0.5	-1	-0.5	0	2	0.5
		64.68	-25.5	-23	-20.5	-22.5	-21.5	-22	-19.5	-19.5	-23				64.68	-2	1	1	-0.5	-1	1	1.5	1.5	1
		64.72	-25	-24.5	-21.5	-23	-20.5	-21.5	-20	-19.5	-22.5				64.72	-2	1	0	-1.5	-0.5	3	2	0	0.5
		64.76	-23.5	-24.5	-22	-24	-21	-23	-20.5	-19	-22				64.76	-0.5	0.5	1	-2	0	2	0.5	-0.5	-0.5
		64.8	-23	-24.5	-23.5	-23.5	-21.5	-23	-21	-19	-22				64.8	1	-1.5	-0.5	-1.5	-0.5	1	-0.5	0	-1
		64.84	-23.5	-24	-24	-22	-21.5	-22.5	-20	-18	-23				64.84	1	-1.5	0	-0.5	-1	0.5	0	1	-1
		64.88	-25	-23.5	-25	-22	-21	-21	-20.5	-19	-23				64.88	0	0	0	-0.5	-1.5	1.5	0.5	1	-0.5
		64.92	-26	-23	-24	-22.5	-20.5	-21	-21	-19	-22.5				64.92	0.5	0.5	-0.5	-1	-0.5	1	0.5	1.5	0
		64.96	-26.5	-23	-24	-22.5	-21	-22	-19	-19	-22.5				64.96	-0.5	0.5	-1.5	-1	-1	1	2	1	-0.5
		65	-25	-22	-23.5	-22.5	-22	-23.5	-19	-20	-22.5				65	-0.5	1	-0.5	-0.5	-1	0	2.5	0.5	-0.5
		65.04	-23	-21.5	-23.5	-23.5	-22.5	-24	-19	-19.5	-21.5				65.04	0	1.5	-0.5	0	-2	-0.5	2.5	1	0.5
		65.08	-22	-24.5	-23	-24	-21.5	-24	-20.5	-18.5	-21				65.08	0.5	0	1	0.5	-1	-1.5	1	1.5	0.5
		65.12	-23.5	-25.5	-23.5	-24.5	-21.5	-23	-20.5	-19	-21.5				65.12	0.5	-0.5	1	-0.5	-1.5	0	0.5	0.5	0.5
		65.16	-24	-25	-23	-23	-21	-22	-20	-19.5	-22.5				65.16	0.5	-1	-0.5	-0.5	-1.5	1.5	0.5	0	0.5
		65.2	-24.5	-24	-23	-22.5	-20	-23	-21	-19.5	-22				65.2	0	-1	0	-1	-1	1	0	1	0
		65.24	-24.5	-22.5	-22.5	-21.5	-20.5	-24	-21.5	-19.5	-21				65.24	-1	0.5	0.5	-0.5	0	0	-0.5	2	0.5
		65.28	-24.5	-23.5	-22.5	-21.5	-20	-23	-21	-20	-22				65.28	-0.5	1	0.5	-0.5	1	0.5	1	2	1.5
		65.32	-25	-24	-22.5	-22.5	-21	-22.5	-19.5	-20.5	-21.5				65.32	0.5	1	-1	-1	0	1	1.5	1.5	2.5
		65.36	-25	-23.5	-22.5	-23	-21.5	-22.5	-19.5	-19.5	-21				65.36	1	0.5	-0.5	-0.5	-1	0.5	2	1	3
		65.4	-25.5	-23	-22.5	-23.5	-22	-22	-20.5	-18.5	-21				65.4	0.5	0	0.5	-0.5	-1.5	1	0.5	1.5	2.5
		65.44	-23.5	-23.5	-22.5	-22.5	-22	-21.5	-20	-19	-21.5				65.44	1	0	1	-1.5	-1.5	1	0	1	0.5
		65.48	-23	-24	-23	-22.5	-22.5	-21.5	-21	-19	-22.5				65.48	0.5	0	0.5	-2	-1.5	1	-1	1	-0.5
		65.52	-22.5	-24	-23.5	-24.5	-22	-21.5	-21	-19	-21.5				65.52	1.5	0	-0.5	-2.5	-1	0.5	-1.5	0.5	0.5
		65.56	-22.5	-24.5	-22	-25	-21	-21	-21	-18.5	-19.5				65.56	1.5	-0.5	0.5	-2	0	1	-1	1.5	1
		65.6	-23	-23.5	-24	-23.5	-19.5	-20.5	-20.5	-18.5	-20				65.6	1	0	-0.5	1	0.5	2	0.5	2.5	1
		65.64	-25	-23.5	-24	-22.5	-20	-20	-21	-19	-21				65.64	0.5	0.5	0	1.5	-1	3	1	2	1
		65.68	-25.5	-24	-23.5	-21.5	-22	-21.5	-22	-19	-21.5				65.68	0.5	0	0.5	1	-2	3	0.5	2	1.5
		65.72	-25.5	-24	-24	-23	-21	-22	-22	-19	-23				65.72	0.5	1	0.5	-0.5	-1.5	0	1	1.5	0.5
		65.76	-25	-24.5	-24.5	-22.5	-20.5	-23.5	-21	-19.5	-23.5				65.76	0	0.5	0.5	0	-0.5	-2	1	1	-0.5
		65.8	-24	-25	-24	-22	-21.5	-23	-21.5	-19	-24				65.8	-0.5	-0.5	0	0.5	-0.5	-1	0.5	1.5	0
		65.84	-24.5	-25.5	-22	-21.5	-21.5	-22	-23	-19	-24.5				65.84	0	-1	0	1	-0.5	-0.5	0.5	2	0.5
		65.88	-23.5	-25	-22	-21	-21.5	-22	-23.5	-19	-23				65.88	0.5	-1	-0.5	1	-2	0.5	-0.5	2.5	0.5
		65.92	-22.5	-24	-24	-22	-21.5	-21	-21.5	-20	-22.5				65.92	0.5	0.5	-1.5	0.5	-1.5	1	0.5	2	0.5
		65.96	-23	-23.5	-24.5	-22.5	-21.5	-20.5	-21	-19	-21				65.96	0.5	1	-1.5	0.5	0	1.5	0.5	1.5	0.5
		66	-23	-23.5	-24	-23	-21	-21	-20	-19.5	-20.5				66	0	1	-1	0	0	0.5	0.5	1.5	0.5
		66.04	-24	-22	-26	-23.5	-20	-21	-21	-19	-21.5				66.04	0	1.5	-1.5	0.5	0	-0.5	0	1.5	-0.5
		66.08	-24.5	-21	-27	-23.5	-19	-21.5	-20	-18.5	-22				66.08	1	2	-2	0	1	0.5	1	2.5	-0.5
		66.12	-25	-22	-25	-23	-20.5	-21.5	-19.5	-19.5	-22.5				66.12	1.5	1	-2	0	1	0.5	1	1	0.5
		66.16	-25	-23.5	-24	-23	-21	-22	-20	-20	-23				66.16	0	1	-1.5	0.5	1	0	2	0.5	0
		66.2	-24	-23.5	-22	-23	-21.5	-22	-22	-20	-23				66.2	0	1.5	0	0	-0.5	0	1.5	0.5	1
		66.24	-24	-22.5	-22	-22	-21.5	-22	-22.5	-19	-22				66.24	-0.5	1.5	0	0	-1.5	0	-0.5	1	1.5
		66.28	-24	-24	-22	-21.5	-21	-23	-21.5	-19	-21.5				66.28	-0.5	0	0	0	-1.5	-1	-0.5	1.5	2
		66.32	-23.5	-24	-23	-22.5	-21	-22	-19.5	-19	-22				66.32	0.5	0	-1	-0.5	0	-0.5	0	2	1.5
		66.36	-24	-24	-22.5	-23.5	-20	-21.5	-19	-19.5	-21.5				66.36	0	0	-1	-1	1.5	0.5	0.5	1.5	1.5
		66.4	-24	-24.5	-21.5	-23	-20.5	-21	-20.5	-20	-20.5				66.4	0	0.5	-1	-1.5	1	0.5	0.5	0.5	1.5
		66.44	-24	-24	-22.5	-23	-19.5	-20.5	-21.5	-19.5	-21				66.44	0	1.5	-1	-1.5	0.5	1	0.5	0	1
		66.48	-23.5	-24.5	-23.5	-22	-20.5	-20.5	-21.5	-18.5	-21				66.48	-0.5	0.5	-0.5	-0.5	-1.5	2.5	0.5	0.5	0
		66.52	-25	-24.5	-24	-22	-20	-20	-21	-18.5	-20.5				66.52	-1.5	0.5	-1	0	-2	2	0	-0.5	0
		66.56	-25	-24.5	-24	-23	-20.5	-20.5	-20.5	-20	-21				66.56	-1	1	-1	0	-3	1	-1	-1.5	0.5
		66.6	-25	-24	-23.5	-23.5	-21.5	-20.5	-20.5	-19.5	-21.5				66.6	1	1.5	0.5	0.5	-2.5	2	-1	-0.5	1.5
		66.64	-24.5	-23.5	-22.5	-24	-21	-21	-22	-18	-22.5				66.64	1.5	2.5	0.5	-0.5	-1	1	-1	0.5	2.5
		66.68	-24	-24	-23	-23.5	-20	-21.5	-21.5	-17.5	-22.5				66.68	1	1.5	-0.5	-1.5	1	0	0	1.5	1.5
		66.72	-23.5	-25	-22.5	-22	-18.5	-21.5	-21	-18	-22				66.72	0.5	-0.5	-0.5	-1.5	2	0	1.5	1.5	0.5
		66.76	-24.5	-25.5	-24	-21.5	-18.5	-21.5	-21.5	-19.5	-22.5				66.76	0.5	-1.5	-0.5	-0.5	1.5	0.5	2.5	1.5	0
		66.8	-24.5	-26	-22.5	-22.5	-18.5	-23	-23	-19.5	-22				66.8	0.5	-1.5	0.5	0	1.5	0.5	1.5	2.5	0
		66.84	-25	-27	-21	-24	-19	-22.5	-22	-20	-21				66.84	0.5	-1.5	0.5	-1	1.5	-0.5	0	2	1
		66.88	-24	-25.5	-21	-23.5	-19	-21	-20	-19.5	-20.5				66.88	1	-1	1	-1	1.5	1.5	0.5	2.5	2
		66.92	-23.5	-25	-22	-25	-19	-20	-19	-20	-21				66.92	1.5	0	0	-2	1	3	1.5	1.5	3.5
		66.96	-23.5	-24.5	-22.5	-25	-19	-20.5	-20	-20	-21				66.96	1.5	0.5	-0.5	-2	0	3.5	0.5	1.5	4
		67	-23.5	-24	-23.5	-24.5	-20.5	-22	-21.5	-20	-22.5				67	2	1	-2	-1.5	-2	3	-1	1.5	2.5
		67.04	-24	-24.5	-23	-23	-22	-21.5	-23	-19	-23.5				67.04	2	0.5	-1.5	-1	-3	2.5	-2	1.5	0.5
		67.08	-24	-24.5	-23.5	-21.5	-21.5	-20.5	-23	-20	-22.5				67.08	1	0.5	-1	-0.5	-1.5	1.5	-1	-0.5	0.5
		67.12	-24	-26	-23.5	-21.5	-20.5	-21	-22.5	-19.5	-20.5				67.12	0.5	1	-1	0	-0.5	0.5	0	0	1.5
		67.16	-24	-25	-23	-21.5	-20.5	-20.5	-21	-19.5	-19.5				67.16	0.5	1.5	-1	0.5	-0.5	0.5	0.5	0.5	2
		67.2	-24.5	-25	-23	-20.5	-20.5	-20.5	-20.5	-19.5	-20				67.2	0	1.5	1	1.5	0	0.5	0.5	2	2
		67.24	-24.5	-25.5	-25	-19.5	-20.5	-21	-22	-20.5	-20.5				67.24	0	1	0.5	1.5	0	1	-1	2	2.5
		67.28	-24.5	-25	-26.5	-19	-20.5	-21	-23	-21	-20.5				67.28	-1	1	-0.5	1.5	0.5	1	-1	1	2
		67.32	-25.5	-24	-27	-20.5	-21	-20	-21.5	-20.5	-20				67.32	-1.5	1.5	-1	1	0.5	2.5	-0.5	1	3
		67.36	-25	-23	-25	-21	-21.5	-19.5	-20	-18.5	-19.5				67.36	-1	2	-0.5	0.5	1	4.5	1	2.5	3
		67.4	-24	-24	-24.5	-22	-21	-21	-19	-18.5	-20				67.4	0	1	-0.5	-0.5	1	4	0.5	2	2
		67.44	-24	-25	-22.5	-23	-20.5	-22.5	-19.5	-18.5	-21				67.44	0	1	0.5	0	1	0.5	0.5	1.5	1.5
		67.48	-24	-24.5	-22.5	-23.5	-20	-21.5	-19.5	-20	-21.5				67.48	0	1.5	0	-0.5	0	-0.5	0.5	0	-0.5
		67.52	-23.5	-25.5	-22.5	-23	-20	-19.5	-19.5	-19	-22				67.52	-0.5	1	0.5	0	-0.5	0.5	1	0.5	-1
		67.56	-23.5	-25.5	-23.5	-22.5	-20	-20	-19.5	-18.5	-22				67.56	1	0.5	1.5	-0.5	0	1.5	1.5	0.5	-1
		67.6	-24.5	-24.5	-24.5	-21.5	-20	-20.5	-19	-18.5	-22				67.6	0.5	0.5	1	-0.5	0	2.5	2	1	0
		67.64	-25.5	-24	-24	-21	-20.5	-21	-18.5	-18.5	-23				67.64	0	0.5	1.5	0.5	0	1.5	2	1.5	0.5
		67.68	-25	-24	-23.5	-20.5	-20.5	-21.5	-19	-18.5	-23				67.68	0.5	0.5	1.5	1	0	1	1	1.5	2
		67.72	-24	-24	-24	-22	-20.5	-21	-20	-18.5	-22				67.72	1.5	1	-0.5	0.5	0.5	1	0.5	1	4
		67.76	-23.5	-25	-23	-20.5	-20	-21	-20.5	-19.5	-21.5				67.76	1	1	0	1	1.5	-0.5	0	1	3
		67.8	-22.5	-25	-24	-21	-20	-21	-20.5	-20	-22				67.8	1.5	1	0.5	0.5	0.5	-0.5	0.5	0.5	1.5
		67.84	-22.5	-24	-25	-21.5	-20.5	-21.5	-20	-19	-22				67.84	1.5	2	-0.5	0.5	0	0	1.5	0.5	1
		67.88	-22.5	-23	-25.5	-22	-20.5	-22	-20.5	-19	-23				67.88	1.5	1.5	-2.5	1	0	0	1.5	0.5	0.5
		67.92	-22.5	-22	-24.5	-21.5	-19.5	-21.5	-21	-18.5	-21.5				67.92	1	1	-2.5	1.5	0.5	0	0	0.5	1
		67.96	-23	-21.5	-23.5	-22.5	-20	-21	-21.5	-18.5	-19.5				67.96	-0.5	1	-2	0.5	0.5	1	-1	2	1.5
		68	-23.5	-21.5	-22	-23	-20	-20	-19.5	-19	-19				68	-1.5	2	0	0	1	1	-0.5	2	1.5
		68.04	-23.5	-22.5	-23	-23.5	-20.5	-21	-19.5	-20.5	-20.5				68.04	-0.5	2.5	0	0.5	0.5	0.5	-0.5	0	0
		68.08	-24.5	-24	-22.5	-23	-21	-20	-20.5	-21	-21.5				68.08	0	1	1	-0.5	0	0.5	-0.5	0	0.5
		68.12	-24	-24.5	-23	-23	-21	-20.5	-20	-21	-22.5				68.12	1	-0.5	0.5	-0.5	-0.5	0	0	0	0
		68.16	-23	-23.5	-24	-21.5	-21	-20	-19	-21	-23				68.16	1.5	-2	1.5	0.5	-0.5	0.5	1.5	0	-0.5
		68.2	-23.5	-24.5	-25	-19.5	-21	-20	-19	-20.5	-21.5				68.2	0.5	-1.5	1.5	1.5	-0.5	1	2	0.5	1
		68.24	-24.5	-25	-24.5	-20	-20.5	-21	-19	-19.5	-20				68.24	-0.5	0.5	1	0.5	0	2.5	2	1	2
		68.28	-24.5	-25	-24	-21.5	-22	-22	-19.5	-19.5	-21				68.28	-1	1	0	0.5	0.5	3	1	1	1.5
		68.32	-23.5	-24.5	-24.5	-21.5	-22.5	-22	-20.5	-18	-22				68.32	-1	1	-1	1	0.5	2	0.5	1.5	0.5
		68.36	-23	-24	-24.5	-22	-23	-21.5	-20.5	-18	-21.5				68.36	0.5	1.5	-1	1	0.5	1.5	0.5	2	-0.5
		68.4	-23.5	-24	-23.5	-22	-23	-20	-19.5	-19.5	-21				68.4	1	1.5	0	1	-0.5	1	0	1.5	-1.5
		68.44	-23	-25	-23.5	-21.5	-20.5	-21	-19.5	-20	-22				68.44	1	-0.5	2.5	0	1	0	0.5	0.5	-0.5
		68.48	-23	-25	-22	-21	-20	-20	-20.5	-18.5	-22				68.48	1.5	0	3.5	0.5	2	0	0.5	1.5	1.5
		68.52	-24	-25	-22	-20	-21	-20.5	-21.5	-18	-22				68.52	0.5	0.5	1.5	1	0.5	0	0.5	1.5	2
		68.56	-25	-23	-22	-22	-21.5	-22	-22	-19.5	-22				68.56	0	2	-1	-1	-0.5	0	0.5	1.5	2
		68.6	-24.5	-23	-22.5	-23.5	-20.5	-22	-21	-22.5	-21.5				68.6	0.5	3	-2	-0.5	0	0.5	0.5	0.5	1.5
		68.64	-23.5	-24.5	-23	-23	-22	-21	-21	-21	-21.5				68.64	1	2	-1	1	-1	1	0.5	1.5	1
		68.68	-23	-26.5	-23.5	-22	-22	-21	-20.5	-20	-20.5				68.68	1.5	0.5	0	1	-1	1	1	1.5	1.5
		68.72	-22.5	-26.5	-23.5	-21.5	-21.5	-21	-19.5	-19	-20.5				68.72	1	-0.5	1	1	0	0.5	1.5	1.5	1
		68.76	-22	-25.5	-23.5	-22	-21	-21	-18	-18.5	-20.5				68.76	0.5	-1	0	0.5	0.5	0	1.5	1.5	1.5
		68.8	-22	-24	-24	-23	-21.5	-20	-17	-18.5	-21				68.8	-0.5	0	-1	0.5	0	0.5	1	2.5	1.5
		68.84	-22.5	-24.5	-24.5	-23.5	-22.5	-19.5	-19	-19.5	-22				68.84	0	0	-1	0	-1	1	0.5	2	0.5
		68.88	-22.5	-24.5	-24	-23	-23.5	-21	-19.5	-19.5	-22.5				68.88	1	0	-0.5	0	0	-0.5	1	1	0
		68.92	-22	-23	-23.5	-23	-23	-21.5	-20.5	-20.5	-22.5				68.92	1	0.5	0	-0.5	0	-0.5	0.5	0	0.5
		68.96	-22.5	-22.5	-23	-22.5	-22	-21	-21	-20.5	-22.5				68.96	1.5	0.5	0.5	0	-0.5	0.5	-1	0.5	0.5
		69	-23	-24.5	-23.5	-22	-21	-20.5	-20.5	-19.5	-23				69	1.5	-0.5	0	0.5	0	1.5	-2.5	1	1
		69.04	-23.5	-26	-23	-21.5	-21	-19.5	-19.5	-18.5	-23.5				69.04	0	-1.5	0	1	0	2.5	-0.5	1	1.5
		69.08	-23	-26.5	-22.5	-21.5	-21	-19.5	-19	-19.5	-22.5				69.08	-0.5	-1.5	1	0.5	1	2	1.5	0.5	0.5
		69.12	-22	-25.5	-21	-21	-20	-19.5	-19.5	-20	-21				69.12	0.5	-1	1	0.5	3	1	2	1.5	-0.5
		69.16	-21	-25	-23	-22	-20	-19.5	-19	-20.5	-21				69.16	2	-0.5	0	0.5	2	1	2.5	1	-1
		69.2	-20.5	-24	-23.5	-23	-21	-21.5	-18	-20	-21				69.2	2	1	0.5	0.5	1.5	0	2	1	-0.5
		69.24	-20.5	-24	-23	-22.5	-21.5	-21	-18.5	-19	-21				69.24	2	1.5	1	0.5	1	-1	1.5	2	0
		69.28	-21.5	-24	-22	-21	-20.5	-20.5	-20	-19	-22				69.28	1.5	1	1	1	0.5	-0.5	1	3	0
		69.32	-23	-25	-23.5	-21	-20	-20.5	-20	-19	-22				69.32	1	0	0.5	0.5	1	1	1.5	4	0.5
		69.36	-23.5	-25	-22.5	-22	-21	-21	-20	-19	-20.5				69.36	0.5	-0.5	0	-0.5	-0.5	1	0	2.5	1
		69.4	-24	-24.5	-22	-22.5	-21	-21.5	-19.5	-18.5	-18.5				69.4	0.5	0.5	-0.5	-1	-1.5	0.5	-0.5	1.5	1.5
		69.44	-23.5	-24	-22.5	-21.5	-22	-20.5	-18.5	-19.5	-20				69.44	0.5	-0.5	0	0.5	-1.5	1.5	1.5	0.5	1
		69.48	-23.5	-23.5	-22	-21	-21.5	-19.5	-17.5	-20.5	-21.5				69.48	1	0	1	1	-1	2.5	3.5	-0.5	0.5
		69.52	-23.5	-25.5	-20.5	-22	-20.5	-20	-17.5	-20	-21				69.52	0.5	0.5	1.5	0	-0.5	2.5	4	0.5	1.5
		69.56	-23	-26	-20	-22.5	-20	-20	-19.5	-19	-20				69.56	0.5	0	1.5	0.5	-0.5	2.5	2	1.5	1.5
		69.6	-23	-26.5	-21.5	-22.5	-20.5	-20	-21	-18.5	-20				69.6	0	-1	1	1	0	1.5	1	1	1.5
		69.64	-24.5	-25.5	-22	-22.5	-21	-20	-22	-18	-21				69.64	-0.5	-1	1	1.5	1	1.5	0	1	0.5
		69.68	-24.5	-24.5	-22.5	-24	-20.5	-19.5	-20.5	-18	-22				69.68	0	-1	0.5	0	0.5	1.5	-0.5	1	0
		69.72	-24	-24	-22	-23.5	-21.5	-20	-19.5	-18	-22				69.72	0.5	-0.5	0.5	0.5	-0.5	1	0.5	1.5	0
		69.76	-23.5	-25.5	-22.5	-22.5	-21	-20.5	-19	-18.5	-22.5				69.76	1.5	-2	0.5	0	0	1	1	1.5	0.5
		69.8	-24	-26	-23	-23	-21	-21.5	-19.5	-18.5	-22				69.8	0.5	-2	0.5	-1.5	0	0	0	2	0.5
		69.84	-24	-25.5	-23	-23.5	-21.5	-21	-21	-19.5	-21.5				69.84	-0.5	-1.5	0.5	-2	-1.5	-1	0	1.5	-1
		69.88	-23.5	-24	-23	-22	-22.5	-21	-22	-20.5	-21.5				69.88	0	0.5	0	-1	-1	-0.5	1	1	-1
		69.92	-24.5	-24	-24.5	-22	-22.5	-22	-21.5	-20	-22				69.92	0.5	0.5	-2	1	-0.5	0	1.5	0.5	-0.5
		69.96	-25	-25	-22.5	-21.5	-23	-20.5	-20.5	-19	-21.5				69.96	1	0	-0.5	1.5	0	2	1	1.5	0
		70	-25	-25	-22	-21.5	-23	-19.5	-20	-19	-21.5				70	1.5	-0.5	0	1	0	2.5	1	1	1
		70.04	-25	-24.5	-21	-21	-22	-20	-21	-18.5	-22.5				70.04	1	-0.5	1	1	-0.5	0.5	1.5	0.5	0
		70.08	-25.5	-25.5	-21.5	-21.5	-21	-20	-20	-19	-22				70.08	-1	-0.5	1	0.5	0	-0.5	1.5	-0.5	1
		70.12	-25.5	-26	-22.5	-21.5	-21.5	-20.5	-19	-19.5	-23				70.12	-2	-1	0.5	-0.5	0.5	-0.5	1.5	-0.5	1
		70.16	-24.5	-26.5	-21.5	-21	-22	-20	-19.5	-20	-23.5				70.16	-1.5	-2	-0.5	0	0	-0.5	1	-0.5	0.5
		70.2	-24.5	-25.5	-21.5	-21	-21.5	-20	-20	-19	-24.5				70.2	-1.5	-1.5	0	0.5	-1	0.5	0.5	1.5	-1
		70.24	-24	-24.5	-23	-21.5	-20.5	-20	-19.5	-18.5	-24				70.24	-0.5	0	0.5	0	-0.5	0.5	1	1.5	-1.5
		70.28	-23	-25	-23	-22	-20	-20.5	-19.5	-19	-22				70.28	1.5	0	0.5	0	0	0.5	1	1	0
		70.32	-22.5	-25.5	-23	-22	-21	-21.5	-21.5	-20	-22.5				70.32	3	0	0	0.5	-0.5	-0.5	0.5	1	0
		70.36	-22.5	-26	-22	-22.5	-21	-21	-21	-20	-21.5				70.36	3	0	0	1	-1	-1	1.5	0.5	2
		70.4	-24	-27	-22.5	-23	-21.5	-21	-19.5	-20.5	-21				70.4	1.5	-1	0	0	-1.5	-1	1.5	-0.5	2.5
		70.44	-23.5	-26.5	-23	-23	-21	-21	-19.5	-20	-21				70.44	1	-1.5	-1	1	1	0	0.5	0	2
		70.48	-23.5	-25.5	-23	-22	-20	-21	-18.5	-19	-21				70.48	1	-1.5	-1.5	1	2	0.5	1.5	1	1
		70.52	-23.5	-24	-22.5	-22.5	-20.5	-20	-18.5	-18.5	-20.5				70.52	2	-1.5	-1	0.5	1	1	2	2	0.5
		70.56	-23	-24.5	-23.5	-23	-21.5	-20.5	-19	-18.5	-21.5				70.56	2	-1.5	-1	0	0	1.5	2	3	0.5
		70.6	-23.5	-24	-23.5	-24	-21.5	-20.5	-20.5	-19.5	-20.5				70.6	0.5	-1	-0.5	0	0	1.5	0	1.5	0.5
		70.64	-23.5	-24	-23	-24	-21	-21	-21	-20.5	-21				70.64	0.5	-0.5	-0.5	-0.5	0	0	0	0.5	0
		70.68	-23.5	-25.5	-22.5	-22	-20	-21.5	-20.5	-21	-22.5				70.68	0.5	-1	-0.5	-0.5	0	-0.5	0.5	0	0
		70.72	-24	-24.5	-22	-21.5	-20.5	-21.5	-20.5	-20	-22				70.72	1.5	0	-1.5	-1.5	-1	0.5	0.5	1.5	1
		70.76	-23.5	-25	-20	-21.5	-21.5	-21	-20.5	-20.5	-22				70.76	2	0	0	-0.5	-1	1	0.5	0	1
		70.8	-23.5	-24.5	-20.5	-22	-21.5	-21.5	-19.5	-20	-21.5				70.8	1.5	0	-1	-0.5	-0.5	-0.5	1	0	1
		70.84	-24	-24	-21	-21	-21.5	-21	-20.5	-19	-21.5				70.84	1.5	0	0	-0.5	0	0	0.5	1	0.5
		70.88	-25	-23.5	-22	-20.5	-21.5	-20	-20	-19.5	-21.5				70.88	1.5	0.5	-0.5	-1	-0.5	1.5	1.5	1	-1
		70.92	-25	-23	-22	-20	-21.5	-20	-20	-20.5	-21				70.92	1.5	1	0.5	0	-1.5	1	2	1.5	0
		70.96	-24	-24	-21.5	-21	-20.5	-19.5	-20	-20	-21.5				70.96	3	0.5	1	-0.5	-0.5	1	1.5	2	0.5
		71	-23.5	-26	-21.5	-21.5	-20	-19	-20.5	-19	-22				71	3	-1.5	1	-1	0.5	1.5	2	3.5	1
		71.04	-22.5	-26.5	-22	-21.5	-21	-19.5	-19.5	-18	-22				71.04	1.5	-2.5	0	-1.5	-1	0.5	2	3	0
		71.08	-22.5	-25	-21.5	-22	-21.5	-20	-20.5	-17.5	-21.5				71.08	0	-1.5	0	0	0	0	1.5	2	0
		71.12	-23.5	-24.5	-22	-22.5	-21.5	-20.5	-20.5	-17.5	-22				71.12	0	-0.5	-0.5	-1	0.5	0.5	1	2	0
		71.16	-24	-25	-21.5	-22	-21	-21	-21	-18.5	-22				71.16	0.5	-1.5	0.5	-2	0	-0.5	-0.5	0	0.5
		71.2	-24.5	-25	-21	-22.5	-21	-21	-21	-19.5	-23.5				71.2	0	-2.5	1.5	-3	0.5	0	-1	1	-0.5
		71.24	-24	-25	-21.5	-22.5	-22	-20.5	-21	-20	-23.5				71.24	0.5	-3.5	1	-1.5	1	1	-1	1	-0.5
		71.28	-23	-25	-21.5	-22.5	-22.5	-21	-21	-19.5	-23				71.28	0	-2.5	-0.5	-2	-1	0	0	2	-1
		71.32	-23	-25	-20.5	-23	-23	-21	-19.5	-19.5	-23				71.32	0.5	-1	-1	-1.5	-1.5	-0.5	1	1	-2
		71.36	-23.5	-25	-20.5	-23	-22	-20.5	-19.5	-20	-23				71.36	0.5	-0.5	-0.5	-2	-1	0	0.5	1	-1.5
		71.4	-24	-25.5	-23.5	-23	-21.5	-20	-20	-20.5	-23				71.4	0	-1	-1.5	-1	-1	0	1	0.5	-1
		71.44	-24	-24	-24.5	-23.5	-21.5	-22	-21	-19.5	-21.5				71.44	0	-0.5	-1	-0.5	-0.5	-0.5	0.5	0	-2
		71.48	-23	-25	-23.5	-23	-22.5	-23	-21	-17.5	-20				71.48	0.5	-1.5	0	0	-0.5	-1	0.5	0.5	-1
		71.52	-23	-26	-23	-23	-22	-21.5	-21	-18	-20				71.52	0.5	-2.5	0	-1	-1	0	1.5	1.5	0.5
		71.56	-22.5	-26.5	-21.5	-22	-23	-22	-21	-19.5	-22				71.56	0.5	-2	0.5	-1	-1.5	-1	1.5	1	1
		71.6	-23.5	-26	-21	-21	-21.5	-22	-19.5	-19	-23.5				71.6	0	-2	0	-1	-1	-1.5	2	1	0.5
		71.64	-23	-25.5	-20.5	-20.5	-21	-22	-18.5	-19	-23				71.64	0.5	-2	0.5	-1	-1.5	-1	2.5	0	0
		71.68	-23	-23.5	-21	-21	-21.5	-23	-18.5	-19.5	-23				71.68	1	-1	1	-2	-1	-1.5	1.5	0	-1.5
		71.72	-24	-24.5	-22.5	-21	-22.5	-22	-19.5	-19.5	-22.5				71.72	0.5	-1.5	0.5	0	-1	-1.5	0.5	1	-1.5
		71.76	-24.5	-25.5	-22.5	-21	-23	-21	-19.5	-19.5	-22.5				71.76	0	-2	0	0.5	-1.5	-1	0.5	2	-0.5
		71.8	-22	-26	-21.5	-20.5	-22.5	-20	-19.5	-19	-22.5				71.8	1	-2	0.5	0.5	-1	0	1	2	-0.5
		71.84	-21	-25	-21.5	-20.5	-20.5	-20.5	-20.5	-19	-22				71.84	2	-2	-0.5	0	0	0.5	1	2	-0.5
		71.88	-22.5	-24	-22	-21.5	-20	-21	-20.5	-20	-22				71.88	2.5	-1.5	-1.5	-0.5	0	0.5	1	0.5	-0.5
		71.92	-24.5	-24	-22	-22.5	-20.5	-21.5	-20.5	-20	-22.5				71.92	2.5	-1.5	-1	0	0.5	0.5	0.5	0.5	0
		71.96	-24	-24.5	-21.5	-21.5	-21.5	-22.5	-20.5	-21	-22.5				71.96	2.5	-1	-0.5	0	2.5	1	0	0.5	0
		72	-22.5	-25	-21	-21.5	-23	-21	-20	-20	-23				72	3	-2.5	0	-0.5	1.5	2	0	0.5	0
		72.04	-22	-24.5	-21.5	-21.5	-23.5	-20	-19	-19.5	-21.5				72.04	1.5	-2	0	-1	1	2.5	0.5	0.5	0.5
		72.08	-22.5	-24	-21.5	-21	-23	-20	-19.5	-17.5	-21.5				72.08	0.5	-0.5	1	-0.5	0	2	2	2.5	0.5
		72.12	-23	-24	-23	-21.5	-22	-20.5	-20.5	-16.5	-21				72.12	0.5	0	0.5	-1.5	-1	1	2.5	2.5	0
		72.16	-23.5	-25	-22.5	-21.5	-21	-20.5	-21	-18	-23.5				72.16	-1	-1	1	-1.5	-0.5	1.5	2	2	-2
		72.2	-24	-24.5	-22	-21.5	-22	-21.5	-21.5	-21	-24.5				72.2	-1.5	-1	1	-0.5	0	2	1.5	-0.5	-2.5
		72.24	-24.5	-24	-21.5	-22.5	-21.5	-22	-21	-21	-24.5				72.24	-0.5	-1	1.5	-0.5	1	1.5	1	0	0
		72.28	-25	-24.5	-21.5	-23.5	-20.5	-21.5	-20.5	-20.5	-23				72.28	-0.5	-2	1	-0.5	1	1	1	0.5	0.5
		72.32	-24	-26	-21	-23	-20	-22.5	-20	-19.5	-21				72.32	0.5	-3	1.5	-1	0.5	0.5	0.5	0	0.5
		72.36	-23	-25	-20.5	-22.5	-20.5	-24	-19.5	-19	-22				72.36	1.5	-1	1	-1	1	-0.5	0.5	0	0
		72.4	-23	-25	-21	-22	-21.5	-23.5	-20.5	-18.5	-24				72.4	1	-0.5	0.5	-1	-0.5	-0.5	0.5	0	0.5
		72.44	-23.5	-24.5	-21.5	-21.5	-21.5	-23	-19.5	-18.5	-23.5				72.44	-0.5	-0.5	-1	-1	-1	0.5	1	0.5	1
		72.48	-24	-24.5	-21.5	-22	-21	-22.5	-20	-19.5	-22.5				72.48	-0.5	-2	-1.5	-2.5	-1.5	0.5	1	1.5	1.5
		72.52	-24	-24.5	-22.5	-22.5	-21.5	-22.5	-19	-19.5	-22				72.52	0.5	-1	-2	-2.5	-1.5	0.5	2	0.5	1
		72.56	-24.5	-25.5	-22.5	-21.5	-22	-22.5	-19	-19	-22.5				72.56	0	-1.5	-1.5	-1.5	-0.5	-0.5	2.5	-1	-1
		72.6	-23.5	-26	-21.5	-20.5	-21.5	-21.5	-20.5	-19	-22				72.6	0.5	-2.5	-0.5	0.5	0	0	2	-1	-1
		72.64	-23.5	-25.5	-20.5	-21	-21	-20.5	-20.5	-18.5	-21				72.64	-0.5	-2.5	1	1	-1	0.5	1.5	0.5	-1
		72.68	-24	-25.5	-21.5	-21.5	-21	-20.5	-19	-19.5	-21				72.68	0.5	-2	1.5	0.5	-2	0	1.5	2	0
		72.72	-25	-26.5	-23.5	-21.5	-20	-21	-20	-20.5	-22.5				72.72	0	-2	1	-0.5	-1.5	0	0.5	1.5	0
		72.76	-25	-25.5	-23.5	-20.5	-20.5	-20	-21	-20.5	-23				72.76	-0.5	-1.5	0	-1	0	1	-1	0	0.5
		72.8	-25	-24.5	-22.5	-20	-22	-19.5	-20.5	-20	-23.5				72.8	-0.5	0	-1	0.5	-0.5	1	-1	-1.5	2
		72.84	-23.5	-25	-22	-20.5	-21	-19	-20.5	-20.5	-24				72.84	0.5	-1.5	0	2	0.5	0.5	0	-1.5	1
		72.88	-23	-25.5	-21	-21	-22	-20	-20.5	-20.5	-24				72.88	2	-2.5	1	0.5	-0.5	0	0.5	-1.5	-1
		72.92	-24.5	-26	-21	-21.5	-23.5	-20.5	-21	-19.5	-23				72.92	1.5	-2	0	-0.5	-2	0.5	1	-1	0.5
		72.96	-27	-25	-21	-21.5	-23.5	-21.5	-21	-17.5	-22.5				72.96	-1	-1	-0.5	-0.5	-3.5	0.5	2	1.5	0.5
		73	-27	-25	-20.5	-22.5	-23	-21	-20	-17	-22.5				73	-1.5	-1.5	0	-2	-2	1	1.5	2	1
		73.04	-26	-24.5	-20	-22.5	-21.5	-21	-19	-18	-22				73.04	0	-1.5	1	-2	0.5	2	3	2	1
		73.08	-24	-24.5	-21	-22	-20.5	-21.5	-19	-19	-22				73.08	2	-2	0	-0.5	1.5	1	2.5	1	1
		73.12	-24	-25.5	-22	-21	-21	-20.5	-19	-19	-21.5				73.12	1	-3	0	0.5	1	1	2	0.5	1
		73.16	-24	-25	-21.5	-21	-21.5	-20	-19.5	-18.5	-22				73.16	0	-2	0.5	1	0	0.5	1	0	0.5
		73.2	-24.5	-25	-21	-20.5	-21.5	-20.5	-20.5	-18.5	-22				73.2	-1	-1	1	1	-1	-0.5	0.5	0	1.5
		73.24	-25.5	-25	-20.5	-21	-21.5	-21	-21	-20.5	-22.5				73.24	-0.5	-2	1.5	0	-0.5	0	0	0.5	0
		73.28	-26	-25.5	-20.5	-21	-22	-21	-21	-19.5	-22.5				73.28	-1	-3	1	-0.5	-1	0.5	0	1	0
		73.32	-25.5	-24	-21	-21.5	-22.5	-20.5	-20	-20	-20.5				73.32	-0.5	-1.5	0	0	-1	0	1	1	2.5
		73.36	-24.5	-23.5	-21.5	-21.5	-22	-20.5	-20	-20	-20				73.36	0	-1.5	0	0	-1.5	0.5	1	1.5	3
		73.4	-23.5	-24	-21	-22	-21	-22	-21	-20.5	-22.5				73.4	1	-1.5	1	-0.5	-0.5	0.5	0	0	1
		73.44	-23.5	-25.5	-21.5	-22	-20.5	-21	-22	-20	-23.5				73.44	1	-3	1	0.5	-0.5	1.5	-0.5	0	0.5
		73.48	-23	-25.5	-22	-21.5	-21.5	-20.5	-21	-19	-22				73.48	2	-2	0.5	0	-0.5	2	0	0.5	1
		73.52	-23	-25.5	-22	-21.5	-23.5	-21	-20	-18	-22				73.52	1.5	-1.5	0.5	-1	-1.5	0	0.5	0	0.5
		73.56	-24.5	-25.5	-21.5	-21.5	-22.5	-21.5	-20	-18	-22.5				73.56	0	-2	2	-0.5	-0.5	0	0.5	0	1
		73.6	-25	-25.5	-22	-21	-22	-21	-20	-18	-22				73.6	0.5	-2.5	1	0	-0.5	0.5	1.5	0	2
		73.64	-26.5	-23.5	-21.5	-21	-21.5	-21.5	-19.5	-19.5	-21.5				73.64	-0.5	-2.5	0.5	0.5	-0.5	0.5	2.5	-0.5	2.5
		73.68	-25.5	-23.5	-20.5	-19.5	-22.5	-22.5	-18.5	-19.5	-22.5				73.68	-1.5	-1.5	1	1	-0.5	0.5	2.5	0	0.5
		73.72	-24.5	-24.5	-22	-20	-22.5	-23	-20	-19	-22.5				73.72	-1.5	-1	0	1.5	0	0.5	1	1	0.5
		73.76	-25	-25	-23.5	-20	-22.5	-22	-20.5	-18	-22				73.76	-2	-2	-1	1.5	-1	0	0.5	2	1
		73.8	-25	-25.5	-23.5	-21	-23	-21.5	-20.5	-19	-22				73.8	-1.5	-2	-0.5	0.5	-2	0	0.5	0.5	0
		73.84	-25.5	-25.5	-23.5	-21.5	-22.5	-21.5	-20.5	-20	-22				73.84	-1	-1	0	-0.5	-2	-0.5	0.5	-0.5	-1
		73.88	-24.5	-25	-22	-23.5	-22.5	-21.5	-20	-21.5	-22				73.88	-0.5	-1	1	-1.5	-1	0.5	0	-1.5	0
		73.92	-24.5	-24.5	-21	-23.5	-22.5	-20.5	-20.5	-20.5	-22				73.92	-1	-2.5	1.5	-1	-0.5	1.5	-1	-2.5	1.5
		73.96	-23.5	-24.5	-22.5	-22.5	-21.5	-20.5	-21.5	-20.5	-22				73.96	0.5	-2.5	1	-0.5	0	1.5	-2	-1.5	1.5
		74	-23.5	-25	-22.5	-21	-20.5	-21.5	-21.5	-18.5	-22				74	0.5	-1.5	1	0	0	2	0	1	1.5
		74.04	-24.5	-26	-22	-20	-21.5	-23	-20.5	-19	-21.5				74.04	0.5	-1.5	1	1	-1.5	2	1	2.5	2
		74.08	-24	-27.5	-22	-21	-22	-22.5	-19	-20.5	-22.5				74.08	0	-2.5	1	1	-2.5	1	2.5	1.5	1
		74.12	-23.5	-26.5	-22.5	-22	-22	-21.5	-20	-21	-22.5				74.12	0	-3	-0.5	1	-2	0.5	2	0.5	1.5
		74.16	-24	-26	-21.5	-21.5	-21.5	-20.5	-20.5	-19	-22				74.16	-0.5	-3	0	1	0	1.5	1.5	1	1.5
		74.2	-24.5	-24	-21.5	-22	-22	-22	-20	-19	-22.5				74.2	-0.5	-2	-0.5	-0.5	0.5	0	1.5	0	0.5
		74.24	-24	-24	-22.5	-22	-22.5	-22.5	-20.5	-19	-22				74.24	-1	-2.5	-1	-1.5	-0.5	-0.5	-0.5	-0.5	1.5
		74.28	-23.5	-24.5	-23	-21.5	-23	-22	-20.5	-19.5	-20.5				74.28	0	-3	-1	-1	-0.5	0	0	-1	3
		74.32	-24	-24.5	-22.5	-21	-23.5	-23	-18	-20.5	-20				74.32	0	-2.5	0	0.5	-0.5	-0.5	2	0	3.5
		74.36	-24	-25.5	-22	-21	-24	-22.5	-18	-22	-20.5				74.36	-0.5	-2.5	0.5	1	-1	-0.5	2	0.5	3
		74.4	-23.5	-25	-22	-21.5	-22.5	-22.5	-19.5	-21.5	-21.5				74.4	-0.5	-2.5	0.5	1	-0.5	0	1.5	0.5	2
		74.44	-24.5	-24	-22	-22	-21.5	-22	-20	-21	-23				74.44	-0.5	-2.5	-0.5	0	0	0	1.5	0	0
		74.48	-24.5	-23.5	-22.5	-22.5	-21.5	-22.5	-21	-20	-21.5				74.48	-0.5	-1.5	-0.5	-1	-1	0	1	0.5	1.5
		74.52	-24	-24.5	-22.5	-22.5	-21.5	-22	-23	-19	-19				74.52	-1	-2.5	-0.5	-2	-0.5	-0.5	-0.5	1	3
		74.56	-24.5	-25	-22.5	-22.5	-22.5	-21	-22.5	-18	-19				74.56	-1.5	-1	0	-2.5	-1.5	0	-1	2	2.5
		74.6	-25	-25	-22	-22.5	-23	-20.5	-21	-19	-19				74.6	-1	-1	0.5	-0.5	-2.5	-0.5	-1	1.5	2
		74.64	-25	-25	-22.5	-23	-23	-21	-21	-19.5	-19.5				74.64	0	-1.5	-1	-0.5	-2.5	0.5	-0.5	1	1.5
		74.68	-24	-26.5	-23	-23.5	-23.5	-22.5	-20.5	-21.5	-22				74.68	0	-2.5	-1.5	-1	-2	-2	0.5	-0.5	2.5
		74.72	-24	-27	-22.5	-23	-23	-22	-21	-21.5	-24				74.72	0	-2.5	-1	-2	-2	-1.5	1	-0.5	1.5
		74.76	-24	-27.5	-22	-22.5	-21.5	-21	-21	-21	-23.5				74.76	0	-2	0.5	-2.5	0.5	0.5	0.5	-0.5	1.5
		74.8	-23.5	-26.5	-22	-21.5	-21.5	-21.5	-20	-19.5	-23.5				74.8	0.5	-2	1	-1	1	0.5	0.5	0.5	1
		74.84	-23	-25.5	-21	-21	-21.5	-22	-19.5	-20	-22.5				74.84	0.5	-1	1.5	0.5	1	0.5	0.5	1	1.5
		74.88	-23	-24	-21.5	-21.5	-21	-22.5	-19.5	-21	-21.5				74.88	0	-1.5	0.5	0.5	1.5	1	0.5	0	3
		74.92	-23.5	-24.5	-23	-21.5	-21.5	-22.5	-20.5	-19.5	-21				74.92	0.5	-3	-1	0.5	0	1	1	1	3
		74.96	-24	-25	-22.5	-21	-22	-23	-20.5	-19.5	-21				74.96	0.5	-3	-1.5	0.5	-0.5	1	0.5	1	3
		75	-24.5	-26.5	-22	-21.5	-23.5	-22.5	-19.5	-20	-20.5				75	-0.5	-2	-0.5	-1	-1.5	0.5	-0.5	0.5	3
		75.04	-25	-27	-20.5	-21.5	-24	-22	-19	-21	-20				75.04	-1	-2.5	1.5	-1	-1.5	0	0	-0.5	3
		75.08	-27	-25	-21	-22	-23	-22.5	-19	-20	-21				75.08	-2	-2.5	1.5	-0.5	-0.5	-1	0.5	0.5	3.5
		75.12	-26	-25	-22.5	-22	-22	-23.5	-20	-19	-23				75.12	-1	-2	0	1	0	-1	0	1	2
		75.16	-24.5	-25.5	-24	-21.5	-23	-24	-21.5	-19	-23				75.16	0	-2	-1	2	-0.5	-1	-1	1	1.5
		75.2	-24	-26	-24.5	-21	-22.5	-24	-21.5	-19.5	-21.5				75.2	2	-2.5	-1	2	0	-0.5	-0.5	2	2.5
		75.24	-24	-25.5	-23.5	-21	-23	-22	-21	-18.5	-21.5				75.24	2.5	-2.5	0.5	0.5	-0.5	-0.5	0	3	2
		75.28	-24	-25.5	-22.5	-21	-22	-20.5	-20	-19	-21				75.28	0.5	-3	0.5	-0.5	1	0	0.5	1	2
		75.32	-24	-26	-22	-21	-21	-21	-19.5	-19	-22.5				75.32	0.5	-2	-0.5	-0.5	1.5	1	1	0.5	1.5
		75.36	-24	-26.5	-21.5	-22	-21	-21	-18.5	-20.5	-24				75.36	0.5	-1.5	0	0.5	1.5	2	1	-0.5	1
		75.4	-25	-26.5	-21.5	-22	-21.5	-21.5	-19	-21.5	-24				75.4	0	-1	0	0	0.5	1	0	0	0
		75.44	-24.5	-25.5	-22	-21.5	-21.5	-21.5	-20	-21	-24				75.44	0	-2.5	0	0	-0.5	1	-0.5	0.5	1
		75.48	-24	-24.5	-21.5	-22.5	-22	-21.5	-19.5	-19.5	-22.5				75.48	0	-2.5	2	-1	-1	1	0.5	1.5	3
		75.52	-23.5	-25	-21.5	-22.5	-22.5	-21	-19.5	-20	-22.5				75.52	-0.5	-2	1.5	-2	0	1.5	0	0	2.5
		75.56	-23.5	-25	-21.5	-22	-23.5	-20.5	-19.5	-20	-22.5				75.56	0.5	-1.5	0	-2	-1	2	-0.5	0	1
		75.6	-23.5	-24	-22	-21.5	-22	-20.5	-20.5	-21	-21				75.6	0	-0.5	-1.5	-1.5	-0.5	1.5	0	0	2
		75.64	-23.5	-24.5	-21.5	-20.5	-21	-20.5	-21	-20.5	-22				75.64	0	0	0	-1	0.5	1.5	-0.5	1	1
		75.68	-24	-25	-21.5	-21	-21.5	-21	-20	-21	-23				75.68	-2	-1.5	2	-0.5	0	1	0	0.5	1
		75.72	-25	-24.5	-22	-22	-22.5	-22	-20	-19.5	-23				75.72	-1.5	-1.5	1	0	-0.5	-0.5	-1	1	3
		75.76	-25	-25.5	-22	-22	-23	-22.5	-20.5	-20	-22.5				75.76	0.5	-3	1	1	-1	-1.5	-1.5	0.5	3
		75.8	-25.5	-25	-22	-21.5	-22.5	-23	-20	-19.5	-21.5				75.8	0.5	-2	0.5	1	-0.5	-1	-0.5	1	2.5
		75.84	-25.5	-24.5	-22.5	-22	-22	-22.5	-21	-19	-22				75.84	0	-2	-1.5	-1	-1	0	0.5	1	2
		75.88	-25.5	-26	-23	-22.5	-21.5	-22.5	-21.5	-18.5	-22.5				75.88	-1.5	-2.5	-1	-1	0	-0.5	-0.5	1	1
		75.92	-25.5	-26	-23	-22.5	-21.5	-22	-22	-19.5	-22.5				75.92	-1.5	-3.5	-1	-1	0.5	1	-1	1	1
		75.96	-25	-25.5	-23.5	-22	-22	-22.5	-22.5	-20.5	-23				75.96	0	-4	-0.5	-1	0	0.5	-1	1.5	1
		76	-25.5	-27	-24	-22	-22	-21.5	-22	-20.5	-24				76	-1	-4	-0.5	-2.5	0	1	0	1.5	0
		76.04	-25	-26.5	-24.5	-23.5	-22	-22	-21	-21.5	-24				76.04	-0.5	-2.5	-1	-3	-0.5	0.5	0.5	1	0.5
		76.08	-23.5	-25.5	-25	-23	-22.5	-22	-21	-20.5	-23.5				76.08	0.5	-1	-1	-2	-1.5	0.5	0	0	0.5
		76.12	-24	-25.5	-24	-21.5	-23.5	-21.5	-20	-20	-22				76.12	0.5	-1	-1	-1	-1	1	-0.5	0.5	1
		76.16	-25	-25.5	-23.5	-22	-23	-22.5	-20.5	-20.5	-22				76.16	0	-2	-2	-1	0	1.5	-1	1	0.5
		76.2	-25.5	-25	-22.5	-21.5	-22.5	-22.5	-20.5	-20	-23				76.2	0	-2	-2	0	-0.5	1.5	0	2.5	0
		76.24	-25	-25	-22.5	-22	-23.5	-23	-21	-19.5	-22.5				76.24	0.5	-2	-1	-1	-2	1.5	0	3	1
		76.28	-25	-24.5	-23.5	-22	-23	-22.5	-21.5	-19.5	-22.5				76.28	0.5	-0.5	0	-1.5	-2	0.5	-0.5	2	0.5
		76.32	-24.5	-24	-22	-21	-21.5	-21.5	-21	-19	-21.5				76.32	-0.5	0	0	-1	-1.5	0.5	0	1	0
		76.36	-25	-24.5	-21	-21	-21	-21.5	-20	-19.5	-21.5				76.36	-0.5	-0.5	-1	-1.5	-1	0.5	0.5	1.5	-0.5
		76.4	-24.5	-24.5	-21.5	-21	-21.5	-22.5	-19.5	-21.5	-22.5				76.4	0.5	-1.5	-0.5	-0.5	-1	-0.5	1	1	-0.5
		76.44	-24.5	-24	-21.5	-22.5	-21.5	-23	-19.5	-22.5	-23.5				76.44	0	-2	0.5	0.5	0	-1	0.5	1.5	0
		76.48	-24.5	-23.5	-22.5	-22	-19.5	-22.5	-20.5	-22	-21.5				76.48	-0.5	-2	1.5	1.5	1	-1	0.5	1.5	1.5
		76.52	-24	-24	-22.5	-22	-19	-21.5	-21	-20.5	-19.5				76.52	0	-1.5	1	1.5	2	0	0.5	2	3
		76.56	-24	-23.5	-24	-22.5	-20.5	-21	-21	-19.5	-20				76.56	0.5	-1	-1	-0.5	0.5	0	1	2	3
		76.6	-23.5	-24	-23.5	-22.5	-21	-21	-22	-20.5	-22				76.6	1	-0.5	-1.5	-1	0.5	-0.5	0.5	1.5	1
		76.64	-23.5	-25.5	-24	-22.5	-22	-21	-21	-21.5	-24				76.64	0.5	-1.5	-1	-0.5	0	-0.5	0	0	-0.5
		76.68	-24.5	-25.5	-23	-23	-23	-21.5	-21	-21	-24.5				76.68	1	-1.5	-0.5	-1	0.5	-0.5	-0.5	0	-1
		76.72	-25	-26	-23	-23	-22.5	-21.5	-21.5	-21	-23.5				76.72	1	-2	-0.5	-1	-0.5	0.5	0	0.5	-0.5
		76.76	-25	-27.5	-22.5	-22.5	-21.5	-23	-23	-19.5	-22				76.76	1	-1.5	0	-0.5	-1	0	1	1	0
		76.8	-24.5	-27.5	-21.5	-22.5	-22	-22	-22.5	-19.5	-21				76.8	0.5	-1	0.5	-0.5	-2	0.5	1	1	0.5
		76.84	-25	-26.5	-21.5	-22	-22	-21	-20	-20	-21.5				76.84	0	-1	0	-1.5	-2	0.5	2.5	1.5	-0.5
		76.88	-25.5	-25	-22	-22.5	-22	-20.5	-18.5	-20	-21				76.88	-0.5	-1	0	-2.5	-1	0.5	2	2.5	0.5
		76.92	-26	-25	-22	-22.5	-22.5	-20.5	-17.5	-20.5	-20.5				76.92	-0.5	-1.5	0.5	-1	-1	0	1.5	2	2
		76.96	-24.5	-26	-23	-22.5	-23.5	-21	-18	-20	-20.5				76.96	0.5	-2.5	-0.5	1	-2.5	-0.5	1.5	1	2
		77	-23	-25.5	-24	-22	-23.5	-21.5	-19.5	-19	-21.5				77	2	-3	-1.5	1.5	-2	-0.5	0.5	2	1.5
		77.04	-22.5	-25	-23	-21.5	-23.5	-21.5	-20	-19.5	-21.5				77.04	2	-3.5	-1.5	1	-0.5	0	1	2	1.5
		77.08	-23	-24	-23	-22	-24	-22	-20.5	-20	-22				77.08	1	-2.5	-1	0	-0.5	0.5	0	3	1.5
		77.12	-24	-23.5	-22.5	-21.5	-23.5	-22	-21.5	-20	-22				77.12	0	-0.5	-0.5	0	-0.5	1	-1.5	1.5	1
		77.16	-24	-23.5	-22.5	-21.5	-22.5	-21	-22	-19.5	-22				77.16	0.5	0	-0.5	-1	-0.5	1	-1.5	0	0.5
		77.2	-23.5	-24.5	-22.5	-22	-22	-20.5	-21.5	-20.5	-21				77.2	1.5	-1.5	-1	-1	-1.5	0.5	0	0	1.5
		77.24	-24.5	-24.5	-22	-22.5	-21	-20.5	-20.5	-20.5	-22				77.24	0.5	-0.5	0.5	-1	-1.5	0.5	1	0	2
		77.28	-26	-23.5	-21	-22	-21	-21.5	-20	-20.5	-21.5				77.28	-0.5	-0.5	0	-0.5	-1	0.5	2	0	0.5
		77.32	-26.5	-24.5	-22	-22.5	-21.5	-22	-20.5	-20	-21.5				77.32	-1.5	-1	-1	-0.5	-0.5	1.5	1.5	0.5	0.5
		77.36	-25	-25.5	-23	-23	-21	-21	-20.5	-19.5	-22.5				77.36	-1	-1.5	-1.5	-0.5	0.5	2	1	0.5	1
		77.4	-25	-23.5	-23	-23	-22.5	-21.5	-20.5	-19	-23.5				77.4	-0.5	-1	-1.5	-0.5	-0.5	2	1	0.5	1
		77.44	-24	-23	-23.5	-23	-23	-21.5	-20.5	-18.5	-23.5				77.44	0	-1.5	-2	-1.5	0.5	1.5	1.5	1	0.5
		77.48	-23	-23.5	-24	-23	-23	-21	-21	-18	-23				77.48	-0.5	-2	-1.5	-0.5	1	0.5	0.5	2	0.5
		77.52	-22	-24.5	-24	-23.5	-22.5	-20	-22	-18	-23				77.52	0	-2	-1	-0.5	-0.5	1	0	2.5	0
		77.56	-23	-25.5	-22.5	-23	-22.5	-18.5	-22.5	-18	-22.5				77.56	0.5	-2.5	0	-0.5	-1	0.5	0	2.5	0
		77.6	-22.5	-25	-22	-23	-21.5	-19	-22.5	-19	-23				77.6	0.5	-2.5	0	-0.5	-1	0.5	1	1.5	1
		77.64	-23.5	-23.5	-21.5	-23	-21.5	-21.5	-22.5	-19.5	-22.5				77.64	0	-2.5	0.5	-1.5	-1.5	0.5	2.5	1	1.5
		77.68	-23.5	-24	-21	-23	-21.5	-23	-23	-21	-23				77.68	1	-2	0	-1.5	-1	1	2	0	1
		77.72	-23.5	-24	-22	-21.5	-21.5	-22.5	-23	-20.5	-23.5				77.72	1	-1.5	-0.5	-0.5	0.5	0.5	0.5	0	0.5
		77.76	-22.5	-25.5	-23	-20.5	-21.5	-22	-21.5	-19.5	-22.5				77.76	0.5	-2.5	0	0.5	1	0	-0.5	-0.5	1
		77.8	-22.5	-25.5	-22	-22	-21.5	-21	-20	-20.5	-21.5				77.8	0	-2	-0.5	-0.5	1	1	-0.5	0	1.5
		77.84	-24	-25	-22	-23	-22	-20	-21	-20.5	-22.5				77.84	-0.5	-1	-1.5	-1	0.5	3	-0.5	0	0.5
		77.88	-24	-24	-22.5	-23	-22.5	-20.5	-21.5	-19.5	-23				77.88	-0.5	-1.5	-1	-1	0	2.5	0	1	0
		77.92	-22	-23.5	-22	-22.5	-22	-21.5	-23	-18.5	-24.5				77.92	0.5	-0.5	0	-1.5	1	1	0	2	-0.5
		77.96	-22	-24.5	-21	-23.5	-23	-21.5	-23	-18.5	-23.5				77.96	1.5	-1	0.5	-2	0	0	1	1	-0.5
		78	-22	-24.5	-20.5	-24	-21	-22	-22	-19	-23				78	2.5	-1	-0.5	-1.5	-0.5	0	1	0.5	0
		78.04	-23	-25	-21.5	-24.5	-20.5	-20.5	-21	-20	-23				78.04	1	-1.5	-1.5	-2	-1.5	1	1	-1	0.5
		78.08	-21.5	-25	-23	-23.5	-21	-19.5	-20.5	-20	-23.5				78.08	1	-2	-2.5	-2	-1	0	1.5	-1.5	1
		78.12	-21.5	-26	-22.5	-23.5	-20.5	-19.5	-20	-19.5	-23.5				78.12	0.5	-1.5	-1	-2	0	-0.5	1.5	0	1
		78.16	-23	-24	-23	-23	-20.5	-21.5	-19	-20	-22.5				78.16	-0.5	-1	-0.5	-1	1	-0.5	1	1	1
		78.2	-25	-24	-23	-22.5	-20.5	-21.5	-19	-20.5	-22.5				78.2	-1	-1.5	-0.5	0	1	1	1.5	2	1.5
		78.24	-24.5	-24	-22.5	-22.5	-21	-21.5	-19	-20.5	-22				78.24	0.5	-1.5	-0.5	-1	-0.5	-0.5	2	2	2.5
		78.28	-25	-25	-22.5	-22.5	-21.5	-19	-19	-19.5	-22.5				78.28	0.5	-2	-0.5	-0.5	-1.5	0	1.5	3	2
		78.32	-24.5	-24	-23	-22.5	-21.5	-19.5	-19.5	-19.5	-22.5				78.32	0	-2	-0.5	0.5	-1	0	1.5	2.5	1.5
		78.36	-23.5	-23.5	-23	-22.5	-21.5	-20.5	-19	-19	-21				78.36	0	0	-0.5	1	0.5	0.5	1.5	2.5	2
		78.4	-23.5	-22.5	-22	-22	-21	-21	-19.5	-18.5	-21.5				78.4	0	1	-1	1	1	0.5	1	1.5	1
		78.44	-23.5	-23.5	-22	-22	-21.5	-21	-21	-19.5	-22				78.44	-0.5	-0.5	-1.5	-0.5	0	1	-0.5	1	1
		78.48	-24	-23	-22.5	-21	-22	-21	-21	-20.5	-21.5				78.48	0	-1	-1	0.5	-1	1	-0.5	1	2.5
		78.52	-23.5	-23	-22	-22	-21.5	-20.5	-20	-19.5	-23				78.52	1.5	-0.5	0	0.5	-1	1.5	1	0.5	1.5
		78.56	-23	-23	-22	-23	-21.5	-20.5	-20	-19	-23				78.56	2	-1.5	0.5	0.5	0.5	1.5	1.5	1	0.5
		78.6	-23	-23	-23.5	-23.5	-22	-21	-21	-19	-22				78.6	1.5	0	-0.5	0.5	1.5	0	1	0.5	0.5
		78.64	-23.5	-22.5	-24.5	-23	-22	-21	-20.5	-19	-20.5				78.64	-0.5	0.5	-1.5	0.5	0.5	-0.5	0	1	0.5
		78.68	-25	-24	-25.5	-22.5	-22.5	-20.5	-20	-20	-22				78.68	-1.5	0	-2	0	0.5	-0.5	0.5	1	0
		78.72	-24.5	-24.5	-24	-22.5	-21.5	-20	-19.5	-19.5	-22.5				78.72	-1	-0.5	-1	0	1	1	1.5	1	1
		78.76	-23.5	-24	-23	-23	-21.5	-20.5	-19.5	-19	-22				78.76	-0.5	-0.5	-0.5	-1	0.5	1.5	1.5	2	0.5
		78.8	-23.5	-23	-22.5	-23.5	-22	-20.5	-19.5	-19.5	-20.5				78.8	0.5	-0.5	-1	-0.5	0	2.5	1.5	1.5	1
		78.84	-23.5	-23.5	-22.5	-23.5	-20.5	-21	-21	-21	-20.5				78.84	0.5	0	-1	0.5	1.5	2	0	0	1.5
		78.88	-22.5	-23.5	-23	-22	-19.5	-22	-20.5	-21.5	-20				78.88	0.5	0.5	-1	0.5	1.5	0.5	0.5	0	3
		78.92	-23	-24	-23.5	-21.5	-20	-22	-19.5	-20	-20.5				78.92	1.5	-0.5	0	-0.5	0.5	-1	1.5	1.5	2.5
		78.96	-22	-23.5	-23.5	-21.5	-21	-20	-18.5	-19	-19.5				78.96	3	-1	-0.5	-0.5	-1.5	0.5	3	2	3.5
		79	-22.5	-24.5	-24.5	-22.5	-22	-20	-19	-20.5	-20				79	3	-1.5	-1.5	0	-1.5	2	3	1.5	3
		79.04	-23.5	-24.5	-25	-21.5	-21.5	-20.5	-19.5	-21.5	-20.5				79.04	1.5	-1.5	-2	1	-1	1.5	2	1	2.5
		79.08	-24.5	-24	-24	-22	-19.5	-21.5	-20	-20.5	-21				79.08	1	-0.5	-1.5	0.5	0.5	0.5	0.5	0.5	2
		79.12	-24.5	-23	-23	-22	-19.5	-21	-19	-19.5	-21.5				79.12	1	0.5	-1	1	0.5	1.5	0	-0.5	1.5
		79.16	-24.5	-23	-23.5	-21	-21	-20.5	-18.5	-19.5	-20.5				79.16	-0.5	-0.5	-1	1	0	2.5	1	-0.5	2
		79.2	-23.5	-23.5	-23.5	-22	-22	-20	-18.5	-19	-21				79.2	-1.5	-1.5	-1.5	0.5	-1	2	2	1.5	2
		79.24	-25	-23	-22.5	-23	-22	-21.5	-19	-19	-22				79.24	-1.5	-1.5	-0.5	-0.5	-0.5	1	1	1.5	1.5
		79.28	-25	-23.5	-22.5	-23.5	-21.5	-22	-20	-19.5	-22.5				79.28	-0.5	-1	-0.5	-1	0.5	0.5	0	1.5	0.5
		79.32	-25.5	-24	-22.5	-22.5	-21.5	-22.5	-20	-20.5	-21.5				79.32	-1	-1.5	-0.5	-1	0	0	0	1.5	0.5
		79.36	-25.5	-23	-23	-23	-21	-22.5	-20.5	-20	-21.5				79.36	-1.5	-1	-1	-1	1	0.5	0	1	1
		79.4	-25	-22.5	-23	-22.5	-21	-21.5	-20.5	-18	-21.5				79.4	-1.5	-1.5	-1	0	0.5	1	0.5	0	2.5
		79.44	-24.5	-22.5	-23.5	-20.5	-21.5	-20.5	-21	-17.5	-22				79.44	-1	-1.5	-2	1	0	1.5	0	1	3
		79.48	-23.5	-23.5	-23	-20.5	-23	-21.5	-22	-18.5	-22				79.48	0.5	-2	-2	2.5	-1	0.5	-2	1.5	2.5
		79.52	-23	-23.5	-23	-23	-22	-21.5	-22	-20.5	-23				79.52	0.5	-1	-1	1	-1	0	-2	0.5	1.5
		79.56	-21.5	-23.5	-24	-23.5	-21	-21	-21	-22	-22.5				79.56	1	-1	0	-0.5	-1	1	0	-0.5	1
		79.6	-23	-24.5	-23.5	-23	-20.5	-21	-21.5	-21.5	-22				79.6	1	-1	0	-1.5	-1.5	0	0.5	0	0.5
		79.64	-23	-24	-22.5	-22	-20.5	-20.5	-22.5	-21	-22				79.64	1	-0.5	0	-1	-0.5	0	-0.5	1	-0.5
		79.68	-23	-24	-22	-21.5	-20	-20	-21	-19.5	-21.5				79.68	0	0.5	0	-0.5	1	0	0	1	-0.5
		79.72	-24.5	-24	-21	-21.5	-22	-19	-20	-17.5	-20.5				79.72	0	0.5	0	-0.5	0.5	2	1	3	1
		79.76	-23.5	-24	-22.5	-22.5	-23	-20	-20	-17.5	-22				79.76	1.5	-0.5	-1.5	-1.5	-0.5	1.5	0.5	3	1.5
		79.8	-22.5	-24.5	-23	-23	-23.5	-21.5	-19	-18	-22				79.8	1.5	-1.5	-2	-2	-0.5	1	1	2.5	1.5
[truncated: 8,326 more rows]
[truncated: 1 more columns]
