# Supplementary material for: Conserved allosteric inhibition mechanism in SLC1 transporters
Source: eLife. 2023 Mar 1;12:e83464. doi: 10.7554/eLife.83464 (PMC10017108; doi:10.7554/eLife.83464)
Supplement: Figure 3—source data 1. [file elife-83464-fig3-data1.xlsx]

## Sheet: Sheet1
Figure 3 original data		EAAT1-UCPH
Figure 3A	EAAT1-UCPH	current (nA)				Figure 3B	UCPH dose response curve																														Figure 3C	[Glu]-ki relationship
		100µM Glu	100µM Glu+	100µM Glu
	Time(ms)	control	2µM UCPH	50µM UCPH																																		[Glu](µM)	Ki(µM)	std
	-700	-0.10125	-0.034375	-0.04125																																		10	0.05651	0.09375
	-695	-0.095625	-0.03875	-0.043125																																		100	0.56686	0.0669
	-690	-0.096875	-0.03375	-0.0425																																		200	0.58729	0.163
	-685	-0.099375	-0.035625	-0.045625																																		300	0.4375	0.08366
	-680	-0.096875	-0.036875	-0.04625			10µM Glu	Relative Current (n=26)
	-675	-0.093125	-0.03625	-0.0425			[UCPH] (µM)	exp1	exp2	exp3	exp4	exp5	exp6	exp7	exp8	exp9	exp10	exp11	exp12	exp13	exp14	exp15	exp16	exp17	exp18	exp19	exp20	exp21	exp22	exp23	exp24	exp25	exp26	ave	std
	-670	-0.0975	-0.036875	-0.04375			0	-1	-1	-1	-1	-1	-1	-1	-1	-1	-1	-1	-1	-1	-1	-1	-1	-1	-1	-1	-1	-1	-1	-1	-1	-1	-1	-1	0
	-665	-0.09375	-0.036875	-0.045625			0.5	-0.454545	-0.607843	-0.584906	-0.529851	-0.441176		-0.558824	-0.535211	-0.535714	-0.507576	-0.462264	-0.550725	-0.4371	-0.607595	-0.611002	-0.459559		-0.483304		-0.594249	-0.490814	-0.490814	-0.47619	-0.47619	-0.579639	-0.555008	-0.523048	0.057363
	-660	-0.09125	-0.03875	-0.04375			2	-0.227273			-0.235294		-0.323529		-0.333333	-0.285714	-0.227273		-0.195876	-0.298507	-0.27027				-0.272408	-0.27013		-0.296588	-0.191601	-0.280952	-0.190476	-0.239737	-0.328407	-0.262786	0.0467921
	-655	-0.093125	-0.03375	-0.043125			10	-0.0545455	-0.117647	-0.113208	-0.0196078	-0.0196078	-0.12	0.174713	-0.0416667	-0.0357143	-0.0151515	-0.0660377	-0.0721649	0.0533049	-0.0135135			-0.0747474	-0.0747474	-0.1	-0.0351438	0.00524934	0.00524934	-0.00952381	-0.0380952			-0.035573	0.0644856
	-650	-0.09625	-0.036875	-0.0425			50	-0.0454545			-0.0294118	-0.0294118	-0.0933333	0.124138	-0.125	-0.107143	-0.0378788	0	0	-0.115385	-0.00961538	-0.10609	-0.0437637	-0.0867069	-0.0328888	-0.0961039	-0.12279	0.0183727	0.0183727	-0.0380952	-0.0142857	-0.0492611	-0.0410509	-0.0442828	0.0572279
	-645	-0.095625	-0.038125	-0.0425
	-640	-0.093125	-0.035	-0.04625
	-635	-0.089375	-0.034375	-0.048125
	-630	-0.090625	-0.0325	-0.045625			100 µM Glu	Relative Current (n=17)
	-625	-0.09375	-0.035	-0.04125			[UCPH] (µM)	exp1	exp2	exp3	exp4	exp5	exp6	exp7	exp8	exp9	exp10	exp11	exp12	exp13	exp14	exp15	exp16	exp17	ave	std
	-620	-0.08875	-0.035625	-0.045625			0	-1	-1		-1	-1	-1	-1	-1	-1	-1	-1	-1	-1	-1	-1	-1	-1	-1	0
	-615	-0.09	-0.033125	-0.045			0.5	-0.351852	-0.550562		-0.294355	-0.618182	-0.539474	-0.466667	-0.613636	-0.619529	-0.539216	-0.536977	-0.622951		-0.465982	-0.620746	-0.419608	-0.611753	-0.524766	0.104929
	-610	-0.09	-0.03125	-0.043125			2	-0.082716	-0.11236		-0.112903	-0.390909	-0.298246			-0.407407	-0.323529	-0.270096	-0.387978	-0.214533	-0.107831	-0.290113	-0.280392	-0.23025	-0.250662	0.111604
	-605	-0.091875	-0.034375	-0.045			10	0.0148148	0.0702247	-0.0178326	-0.0564516	-0.0681818	-0.0526316		-0.0858586	-0.0673401	-0.0147059	-0.0482315	-0.0382514	-0.0121107	-0.0231065	-0.0875203	-0.101961	-0.0481696	-0.0398321	0.0429402
	-600	-0.088125	-0.0375	-0.045			50	0.0148148	0.0758427	-0.0178326	-0.0403226	-0.0272727	-0.0614035		-0.0757576	-0.0538721	-0.0318627	-0.0450161		-0.0588235	-0.0115533	-0.082658	0.00980392	-0.0876686	-0.0329055	0.0431602
	-595	-0.09125	-0.039375	-0.045
	-590	-0.089375	-0.03625	-0.04375
	-585	-0.0875	-0.033125	-0.04875
	-580	-0.08875	-0.03875	-0.045625			200 µM Glu	Relative Current (n=17)
	-575	-0.084375	-0.03125	-0.044375			[UCPH] (µM)	exp1	exp2	exp3	exp4	exp5	exp6	exp7	exp8	exp9	exp10	exp11	exp12	exp13	exp14	exp15	exp16	exp17	ave	std
	-570	-0.086875	-0.031875	-0.04875			0	-1	-1	-1	-1	-1	-1	-1	-1	-1	-1	-1	-1	-1	-1	-1	-1	-1	-1	0
	-565	-0.08875	-0.033125	-0.041875			0.5	-0.196167	-0.655385	-0.550765		-0.278351	-0.498305	-0.617021	-0.417722	-0.538462	-0.36157	-0.465394	-0.655738	-0.518868	-0.532934	-0.329759		-0.764463	-0.49206	0.154491
	-560	-0.085625	-0.03375	-0.044375			2		-0.516923	-0.205841		-0.0756014	-0.244068	-0.524823	-0.227848	-0.278846	-0.0123967	-0.21957	-0.347541		-0.413174	-0.0710456	-0.503125	-0.371901	-0.286622	0.167837
	-555	-0.086875	-0.0325	-0.044375			10	0.0698985	-0.0492308	0.0681502	-0.378319	0.0045819	0.0610169	-0.0851064	0.0253165	0.00961538	0.00165289	-0.0190931	0.0163934	0.0188679	0.0399202	-0.0294906	-0.05625	0.053719	-0.0146092	0.103886
	-550	-0.0825	-0.039375	-0.045625			50	0.054115	-0.0123077	-0.0584145	-0.123894	0.0114548	0.00813559	-0.0070922	0.0822785	0.00961538	0.0227273	-0.0119332	0.00655738	0.0490566	0.0139721	-0.0268097	-0.0625		-0.0028149	0.0494999
	-545	-0.084375	-0.0375	-0.04125
	-540	-0.085625	-0.0325	-0.0425
	-535	-0.0825	-0.034375	-0.04625
	-530	-0.083125	-0.03	-0.04375			300 µM Glu	Relative Current (n=14)
	-525	-0.081875	-0.0325	-0.043125			[UCPH] (µM)	exp1	exp2	exp3	exp4	exp5	exp6	exp7	exp8	exp9	exp10	exp11	exp12	exp13	exp14	ave	std
	-520	-0.08375	-0.03125	-0.045			0	-1	-1	-1	-1	-1	-1	-1	-1	-1	-1	-1	-1	-1	-1	-1	0
	-515	-0.083125	-0.031875	-0.04125			0.5	-0.57933	-0.571779	-0.546075	-0.407478	-0.456398	-0.251553	-0.342144	-0.571154	-0.551724			-0.553781	-0.522513	-0.310954	-0.472074	0.116069
	-510	-0.088125	-0.033125	-0.041875			2	-0.014556	-0.149693	-0.116041		-0.0293399	-0.060559	-0.127753	-0.03	-0.0871143	-0.243902	-0.417476	-0.0468584	-0.034555	0.0212014	-0.102819	0.117475
	-505	-0.081875	-0.0325	-0.044375			10	-0.0189229	-0.0417178	-0.0443686		0.00488998	0.0015528	0.0381791		-0.00362976	-0.0487805	-0.0226537	-0.0191693	0.00209424	0.261484	0.00907981	0.0832375
	-500	-0.079375	-0.036875	-0.040625			50	-0.0262009	-0.0331288	-0.0341297		0.0114099		0.0558003		0.0417423	-0.0365854	-0.0226537	0.00106496	0.0125654	0.0459364	0.00143826	0.0346889
	-495	-0.083125	-0.038125	-0.04125
	-490	-0.08125	-0.035625	-0.04125
	-485	-0.079375	-0.03375	-0.041875
	-480	-0.08	-0.038125	-0.04375
	-475	-0.080625	-0.036875	-0.041875
	-470	-0.07875	-0.031875	-0.040625
	-465	-0.080625	-0.03875	-0.04375
	-460	-0.07625	-0.033125	-0.04125
	-455	-0.073125	-0.035	-0.04125
	-450	-0.075625	-0.035625	-0.04375
	-445	-0.078125	-0.04125	-0.040625
	-440	-0.07625	-0.03375	-0.043125
	-435	-0.075	-0.035	-0.040625
	-430	-0.078125	-0.039375	-0.04125
	-425	-0.0775	-0.036875	-0.041875
	-420	-0.07625	-0.039375	-0.0425
	-415	-0.07125	-0.0375	-0.040625
	-410	-0.071875	-0.03875	-0.0425
	-405	-0.073125	-0.0375	-0.043125
	-400	-0.075	-0.035625	-0.043125
	-395	-0.07125	-0.03625	-0.04375
	-390	-0.069375	-0.035625	-0.043125
	-385	-0.071875	-0.03625	-0.043125
	-380	-0.078125	-0.038125	-0.041875
	-375	-0.07375	-0.031875	-0.043125
	-370	-0.07375	-0.035	-0.043125
	-365	-0.07625	-0.02875	-0.045
	-360	-0.07625	-0.03375	-0.041875
	-355	-0.07625	-0.033125	-0.041875
	-350	-0.0775	-0.03375	-0.044375
	-345	-0.07375	-0.029375	-0.04375
	-340	-0.070625	-0.028125	-0.043125
	-335	-0.070625	-0.029375	-0.043125
	-330	-0.07125	-0.03125	-0.04
	-325	-0.0725	-0.035625	-0.0425
	-320	-0.07125	-0.040625	-0.0425
	-315	-0.07	-0.0375	-0.045
	-310	-0.071875	-0.03625	-0.0425
	-305	-0.069375	-0.035	-0.044375
	-300	-0.075625	-0.03625	-0.041875
	-295	-0.071875	-0.04	-0.043125
	-290	-0.070625	-0.0375	-0.040625
	-285	-0.06875	-0.041875	-0.0425
	-280	-0.068125	-0.038125	-0.041875
	-275	-0.068125	-0.04125	-0.03875
	-270	-0.0675	-0.038125	-0.040625
	-265	-0.0675	-0.041875	-0.039375
	-260	-0.066875	-0.039375	-0.04
	-255	-0.0675	-0.04	-0.043125
	-250	-0.06625	-0.041875	-0.0375
	-245	-0.068125	-0.038125	-0.04125
	-240	-0.068125	-0.04	-0.040625
	-235	-0.063125	-0.0375	-0.04375
	-230	-0.0675	-0.040625	-0.040625
	-225	-0.068125	-0.035625	-0.036875
	-220	-0.065	-0.041875	-0.04125
	-215	-0.064375	-0.03875	-0.036875
	-210	-0.065	-0.04375	-0.0375
	-205	-0.065625	-0.03875	-0.04125
	-200	-0.066875	-0.03875	-0.0425
	-195	-0.065625	-0.040625	-0.038125
	-190	-0.06125	-0.04125	-0.041875
	-185	-0.060625	-0.04125	-0.041875
	-180	-0.065	-0.041875	-0.041875
	-175	-0.063125	-0.038125	-0.039375
	-170	-0.06625	-0.038125	-0.0425
	-165	-0.064375	-0.0375	-0.04125
	-160	-0.065625	-0.035	-0.04375
	-155	-0.06	-0.033125	-0.04125
	-150	-0.06125	-0.03875	-0.04125
	-145	-0.06	-0.03375	-0.04
	-140	-0.06375	-0.03625	-0.040625
	-135	-0.056875	-0.029375	-0.043125
	-130	-0.06	-0.03875	-0.03875
	-125	-0.06	-0.03625	-0.04
	-120	-0.06375	-0.03875	-0.038125
	-115	-0.06125	-0.03875	-0.04125
	-110	-0.05875	-0.041875	-0.039375
	-105	-0.0625	-0.04	-0.041875
	-100	-0.059375	-0.041875	-0.039375
	-95	-0.06125	-0.035	-0.040625
	-90	-0.061875	-0.03375	-0.038125
	-85	-0.059375	-0.038125	-0.04375
	-80	-0.056875	-0.038125	-0.041875
	-75	-0.056875	-0.034375	-0.04125
	-70	-0.058125	-0.04125	-0.04375
	-65	-0.058125	-0.03875	-0.044375
	-60	-0.06	-0.03125	-0.0375
	-55	-0.055625	-0.035	-0.039375
	-50	-0.058125	-0.036875	-0.039375
	-45	-0.055625	-0.03625	-0.04
	-40	-0.051875	-0.0325	-0.039375
	-35	-0.051875	-0.0375	-0.041875
	-30	-0.0525	-0.03625	-0.0375
	-25	-0.05375	-0.035625	-0.04125
	-20	-0.05375	-0.038125	-0.043125
	-15	-0.0525	-0.04	-0.039375
	-10	-0.059375	-0.035625	-0.04
	-5	-0.055	-0.036875	-0.04
	0	-0.060625	-0.033125	-0.043125
	5	-0.0575	-0.035625	-0.03875
	10	-0.054375	-0.031875	-0.039375
	15	-0.05875	-0.039375	-0.0425
	20	-0.056875	-0.0375	-0.041875
	25	-0.055	-0.0325	-0.045
	30	-0.058125	-0.038125	-0.041875
	35	-0.056875	-0.040625	-0.045625
	40	-0.060625	-0.0375	-0.04
	45	-0.060625	-0.035625	-0.041875
	50	-0.051875	-0.0325	-0.0425
	55	-0.053125	-0.039375	-0.041875
	60	-0.055625	-0.041875	-0.04125
	65	-0.0575	-0.03625	-0.043125
	70	-0.05625	-0.03625	-0.038125
	75	-0.059375	-0.035625	-0.0375
	80	-0.06	-0.0375	-0.04
	85	-0.05625	-0.035	-0.03875
	90	-0.05375	-0.03625	-0.038125
	95	-0.056875	-0.031875	-0.040625
	100	-0.055625	-0.03375	-0.041875
	105	-0.0575	-0.035625	-0.04125
	110	-0.0575	-0.031875	-0.03875
	115	-0.0525	-0.03875	-0.043125
	120	-0.056875	-0.034375	-0.04
	125	-0.056875	-0.03	-0.040625
	130	-0.05875	-0.03625	-0.038125
	135	-0.055	-0.03125	-0.039375
	140	-0.058125	-0.033125	-0.035
	145	-0.055	-0.0325	-0.0375
	150	-0.055	-0.035	-0.043125
	155	-0.05625	-0.0375	-0.03875
	160	-0.05625	-0.035	-0.03875
	165	-0.05375	-0.03375	-0.039375
	170	-0.05375	-0.03375	-0.043125
	175	-0.050625	-0.03375	-0.036875
	180	-0.051875	-0.03625	-0.040625
	185	-0.05125	-0.030625	-0.040625
	190	-0.053125	-0.035	-0.039375
	195	-0.048125	-0.031875	-0.0375
	200	-0.053125	-0.0375	-0.038125
	205	-0.05125	-0.03375	-0.036875
	210	-0.046875	-0.03625	-0.0425
	215	-0.0525	-0.036875	-0.043125
	220	-0.055	-0.040625	-0.0375
	225	-0.051875	-0.04	-0.043125
	230	-0.053125	-0.036875	-0.039375
	235	-0.05375	-0.036875	-0.04
	240	-0.05125	-0.039375	-0.0375
	245	-0.04875	-0.033125	-0.03875
	250	-0.051875	-0.03625	-0.041875
	255	-0.04875	-0.04125	-0.041875
	260	-0.05125	-0.03625	-0.03875
	265	-0.046875	-0.034375	-0.039375
	270	-0.051875	-0.035	-0.04
	275	-0.054375	-0.0375	-0.0375
	280	-0.051875	-0.035	-0.040625
	285	-0.051875	-0.035625	-0.03875
	290	-0.05625	-0.0375	-0.03875
	295	-0.050625	-0.03375	-0.040625
	300	-0.051875	-0.03875	-0.04125
	305	-0.050625	-0.0375	-0.039375
	310	-0.054375	-0.0375	-0.040625
	315	-0.05125	-0.039375	-0.040625
	320	-0.054375	-0.0325	-0.03875
	325	-0.0525	-0.031875	-0.04125
	330	-0.050625	-0.0325	-0.036875
	335	-0.0525	-0.035625	-0.03875
	340	-0.055625	-0.036875	-0.038125
	345	-0.051875	-0.035	-0.04125
	350	-0.049375	-0.036875	-0.03875
	355	-0.055	-0.038125	-0.04
	360	-0.051875	-0.0375	-0.04125
	365	-0.05	-0.039375	-0.041875
	370	-0.053125	-0.039375	-0.038125
	375	-0.05	-0.0425	-0.038125
	380	-0.049375	-0.04	-0.03875
	385	-0.0525	-0.04125	-0.038125
	390	-0.050625	-0.040625	-0.04125
	395	-0.05	-0.04125	-0.038125
	400	-0.049375	-0.04125	-0.038125
	405	-0.049375	-0.04	-0.0375
	410	-0.050625	-0.04125	-0.03875
	415	-0.048125	-0.040625	-0.039375
	420	-0.050625	-0.040625	-0.03875
	425	-0.049375	-0.034375	-0.03875
	430	-0.048125	-0.04125	-0.04
	435	-0.05375	-0.03875	-0.040625
	440	-0.055	-0.04125	-0.039375
	445	-0.051875	-0.039375	-0.040625
	450	-0.050625	-0.038125	-0.03875
	455	-0.049375	-0.03625	-0.0375
	460	-0.0525	-0.0375	-0.036875
	465	-0.055	-0.0375	-0.04
	470	-0.05	-0.0425	-0.041875
	475	-0.051875	-0.040625	-0.04125
	480	-0.05	-0.04375	-0.04125
	485	-0.05125	-0.03875	-0.03875
	490	-0.05	-0.041875	-0.038125
	495	-0.04875	-0.04	-0.039375
	500	-0.04875	-0.044375	-0.0375
	505	-0.05	-0.0425	-0.038125
	510	-0.050625	-0.04375	-0.04125
	515	-0.044375	-0.0425	-0.044375
	520	-0.050625	-0.04375	-0.04
	525	-0.051875	-0.041875	-0.043125
	530	-0.0475	-0.04125	-0.038125
	535	-0.04875	-0.0375	-0.04125
	540	-0.050625	-0.039375	-0.040625
	545	-0.048125	-0.04	-0.041875
	550	-0.045	-0.036875	-0.04125
	555	-0.048125	-0.04625	-0.040625
	560	-0.04625	-0.04125	-0.04125
	565	-0.046875	-0.045625	-0.038125
	570	-0.0475	-0.045	-0.04
	575	-0.0475	-0.04375	-0.03625
	580	-0.044375	-0.041875	-0.039375
	585	-0.048125	-0.049375	-0.036875
	590	-0.049375	-0.04375	-0.039375
	595	-0.046875	-0.0425	-0.03875
	600	-0.044375	-0.048125	-0.03875
	605	-0.04625	-0.0475	-0.035
	610	-0.045625	-0.044375	-0.03375
	615	-0.046875	-0.044375	-0.040625
	620	-0.049375	-0.0475	-0.039375
	625	-0.0475	-0.046875	-0.040625
	630	-0.04875	-0.04375	-0.035625
	635	-0.044375	-0.04375	-0.03625
	640	-0.048125	-0.043125	-0.036875
	645	-0.0475	-0.043125	-0.039375
	650	-0.045625	-0.05	-0.039375
	655	-0.049375	-0.043125	-0.03875
	660	-0.046875	-0.039375	-0.04
	665	-0.044375	-0.04125	-0.038125
	670	-0.045625	-0.043125	-0.038125
	675	-0.048125	-0.040625	-0.04
	680	-0.043125	-0.045625	-0.041875
	685	-0.045625	-0.04375	-0.040625
	690	-0.04625	-0.041875	-0.038125
	695	-0.045	-0.044375	-0.039375
	700	-0.04375	-0.040625	-0.03875
	705	-0.044375	-0.040625	-0.036875
	710	-0.0475	-0.040625	-0.0375
	715	-0.04375	-0.043125	-0.039375
	720	-0.045625	-0.043125	-0.04
	725	-0.046875	-0.04375	-0.04
	730	-0.045	-0.044375	-0.040625
	735	-0.04625	-0.0425	-0.04
	740	-0.044375	-0.046875	-0.036875
	745	-0.0475	-0.040625	-0.036875
	750	-0.04375	-0.044375	-0.039375
	755	-0.0475	-0.0475	-0.035625
	760	-0.0475	-0.04375	-0.034375
	765	-0.0475	-0.036875	-0.03875
	770	-0.045625	-0.040625	-0.04
	775	-0.044375	-0.041875	-0.041875
	780	-0.0475	-0.03875	-0.04125
	785	-0.04625	-0.046875	-0.035625
	790	-0.04625	-0.043125	-0.03875
	795	-0.045	-0.044375	-0.040625
	800	-0.043125	-0.045625	-0.03875
	805	-0.04375	-0.045	-0.039375
	810	-0.045	-0.04375	-0.035625
	815	-0.04125	-0.049375	-0.039375
	820	-0.04625	-0.045625	-0.039375
	825	-0.04625	-0.046875	-0.04
	830	-0.043125	-0.041875	-0.036875
	835	-0.04375	-0.044375	-0.0375
	840	-0.04625	-0.04125	-0.035625
	845	-0.048125	-0.039375	-0.031875
	850	-0.04125	-0.0425	-0.035625
	855	-0.04625	-0.04125	-0.033125
	860	-0.0475	-0.0425	-0.035625
	865	-0.044375	-0.04625	-0.035
	870	-0.040625	-0.041875	-0.03625
	875	-0.043125	-0.04125	-0.035625
	880	-0.045625	-0.0425	-0.035625
	885	-0.040625	-0.04125	-0.035625
	890	-0.046875	-0.039375	-0.035
	895	-0.043125	-0.03875	-0.036875
	900	-0.043125	-0.040625	-0.035625
	905	-0.04375	-0.043125	-0.035625
	910	-0.04	-0.04375	-0.036875
	915	-0.043125	-0.040625	-0.034375
	920	-0.040625	-0.041875	-0.03875
	925	-0.045	-0.041875	-0.0425
	930	-0.0425	-0.04375	-0.035625
	935	-0.04	-0.045	-0.040625
	940	-0.04125	-0.04375	-0.038125
	945	-0.038125	-0.045	-0.036875
	950	-0.041875	-0.04625	-0.0375
	955	-0.0475	-0.046875	-0.04125
	960	-0.041875	-0.0425	-0.0375
	965	-0.039375	-0.045625	-0.03625
	970	-0.0425	-0.045625	-0.03875
	975	-0.04375	-0.04625	-0.035625
	980	-0.04375	-0.0475	-0.034375
	985	-0.04125	-0.0425	-0.035
	990	-0.04625	-0.045625	-0.03375
	995	-0.03875	-0.041875	-0.035625
	1000	-0.034375	-0.044375	-0.03625
	1005	-0.040625	-0.04625	-0.035
	1010	-0.04125	-0.044375	-0.033125
	1015	-0.04125	-0.044375	-0.036875
	1020	-0.039375	-0.044375	-0.03375
	1025	-0.044375	-0.046875	-0.03375
	1030	-0.043125	-0.0475	-0.033125
	1035	-0.04125	-0.0475	-0.03125
	1040	-0.039375	-0.044375	-0.03125
	1045	-0.038125	-0.04375	-0.03625
	1050	-0.036875	-0.044375	-0.0325
	1055	-0.0375	-0.046875	-0.035625
	1060	-0.045625	-0.041875	-0.036875
	1065	-0.04	-0.0425	-0.035625
	1070	-0.03625	-0.043125	-0.035625
	1075	-0.041875	-0.0425	-0.03875
	1080	-0.0375	-0.045	-0.038125
	1085	-0.038125	-0.045	-0.034375
	1090	-0.043125	-0.044375	-0.034375
	1095	-0.04125	-0.03875	-0.040625
	1100	-0.03625	-0.04375	-0.040625
	1105	-0.038125	-0.043125	-0.036875
	1110	-0.03875	-0.045625	-0.033125
	1115	-0.038125	-0.04375	-0.03625
	1120	-0.0375	-0.04	-0.038125
	1125	-0.0425	-0.04	-0.033125
	1130	-0.03625	-0.0375	-0.036875
	1135	-0.03625	-0.035	-0.036875
	1140	-0.04	-0.038125	-0.035
	1145	-0.038125	-0.039375	-0.036875
	1150	-0.040625	-0.03625	-0.036875
	1155	-0.04	-0.033125	-0.03875
	1160	-0.038125	-0.035625	-0.03375
	1165	-0.038125	-0.03875	-0.035
	1170	-0.04125	-0.0375	-0.038125
	1175	-0.044375	-0.0375	-0.034375
	1180	-0.04125	-0.04	-0.03625
	1185	-0.041875	-0.036875	-0.04125
	1190	-0.039375	-0.04125	-0.034375
	1195	-0.038125	-0.04375	-0.03625
	1200	-0.0325	-0.043125	-0.034375
	1205	-0.038125	-0.040625	-0.034375
	1210	-0.03625	-0.0375	-0.034375
	1215	-0.03625	-0.03625	-0.0375
	1220	-0.04	-0.038125	-0.03875
	1225	-0.035	-0.043125	-0.0375
	1230	-0.035	-0.043125	-0.04
	1235	-0.0375	-0.04125	-0.040625
	1240	-0.0375	-0.043125	-0.0375
	1245	-0.03375	-0.045	-0.03625
	1250	-0.035625	-0.039375	-0.04
	1255	-0.031875	-0.040625	-0.035625
	1260	-0.03375	-0.041875	-0.035625
	1265	-0.034375	-0.041875	-0.036875
	1270	-0.030625	-0.0425	-0.0375
	1275	-0.036875	-0.041875	-0.03625
	1280	-0.033125	-0.04	-0.03625
	1285	-0.034375	-0.045	-0.03625
	1290	-0.04	-0.04125	-0.035
	1295	-0.035625	-0.041875	-0.034375
	1300	-0.035625	-0.039375	-0.03875
	1305	-0.036875	-0.0425	-0.036875
	1310	-0.038125	-0.03375	-0.034375
	1315	-0.040625	-0.04	-0.0375
	1320	-0.038125	-0.0425	-0.03375
	1325	-0.04	-0.0375	-0.034375
	1330	-0.039375	-0.041875	-0.035
	1335	-0.038125	-0.041875	-0.03875
	1340	-0.04125	-0.04125	-0.036875
	1345	-0.039375	-0.039375	-0.036875
	1350	-0.035	-0.041875	-0.035
	1355	-0.04125	-0.040625	-0.035
	1360	-0.038125	-0.038125	-0.035625
	1365	-0.0375	-0.04125	-0.034375
	1370	-0.039375	-0.04	-0.035625
	1375	-0.040625	-0.04	-0.03375
	1380	-0.04	-0.040625	-0.0375
	1385	-0.04	-0.041875	-0.03625
	1390	0.05125	0.088125	0
	1395	-0.044375	-0.044375	-0.018125
	1400	0.015625	-0.00125	-0.044375
	1405	-0.04375	-0.034375	-0.033125
	1410	-0.05125	-0.0325	-0.035
	1415	-0.04	-0.034375	-0.033125
	1420	-0.05625	-0.0425	-0.03375
	1425	-0.085625	-0.0475	-0.03125
	1430	-0.1225	-0.0525	-0.03875
	1435	-0.144375	-0.051875	-0.04375
	1440	-0.15375	-0.053125	-0.048125
	1445	-0.1425	-0.05125	-0.051875
	1450	-0.138125	-0.049375	-0.053125
	1455	-0.141875	-0.05	-0.05125
	1460	-0.136875	-0.045	-0.05375
	1465	-0.125	-0.04375	-0.051875
	1470	-0.124375	-0.04375	-0.05375
	1475	-0.119375	-0.045	-0.054375
	1480	-0.110625	-0.041875	-0.05625
	1485	-0.110625	-0.045625	-0.053125
	1490	-0.105625	-0.04625	-0.051875
	1495	-0.0975	-0.044375	-0.05375
	1500	-0.094375	-0.043125	-0.045625
	1505	-0.091875	-0.044375	-0.04875
	1510	-0.0925	-0.04	-0.046875
	1515	-0.088125	-0.04375	-0.05125
	1520	-0.08375	-0.045625	-0.048125
	1525	-0.0825	-0.04	-0.048125
	1530	-0.08	-0.041875	-0.048125
	1535	-0.07875	-0.039375	-0.05
	1540	-0.07	-0.040625	-0.044375
	1545	-0.074375	-0.036875	-0.046875
	1550	-0.06375	-0.035	-0.045625
	1555	-0.06625	-0.035625	-0.0425
	1560	-0.068125	-0.03375	-0.04375
	1565	-0.065625	-0.031875	-0.04
	1570	-0.06375	-0.033125	-0.040625
	1575	-0.064375	-0.035625	-0.040625
	1580	-0.060625	-0.035625	-0.043125
	1585	-0.06	-0.035	-0.04375
	1590	-0.059375	-0.03125	-0.044375
	1595	-0.055	-0.029375	-0.0425
	1600	-0.053125	-0.03	-0.044375
	1605	-0.053125	-0.03375	-0.041875
	1610	-0.050625	-0.0375	-0.04375
	1615	-0.048125	-0.029375	-0.04125
	1620	-0.04875	-0.030625	-0.046875
	1625	-0.048125	-0.03375	-0.045625
	1630	-0.05	-0.0275	-0.043125
	1635	-0.048125	-0.03625	-0.039375
	1640	-0.051875	-0.030625	-0.038125
	1645	-0.05125	-0.03	-0.04375
	1650	-0.046875	-0.034375	-0.04375
	1655	-0.045625	-0.031875	-0.03875
	1660	-0.04625	-0.030625	-0.0425
	1665	-0.045625	-0.03125	-0.04375
	1670	-0.04625	-0.033125	-0.0425
	1675	-0.051875	-0.036875	-0.0425
	1680	-0.049375	-0.039375	-0.045625
	1685	-0.050625	-0.06125	-0.041875
	1690	-0.055625	-0.084375	-0.040625
	1695	-0.05375	-0.11125	-0.038125
	1700	-0.055	-0.12875	-0.039375
	1705	-0.049375	-0.139375	-0.040625
	1710	-0.04625	-0.145625	-0.04
	1715	-0.04625	-0.1475	-0.039375
	1720	-0.0425	-0.145	-0.04
	1725	-0.0425	-0.134375	-0.04375
	1730	-0.040625	-0.130625	-0.046875
	1735	-0.041875	-0.124375	-0.053125
	1740	-0.04	-0.11625	-0.0525
	1745	-0.041875	-0.115625	-0.05375
	1750	-0.094375	-0.1075	-0.051875
	1755	-0.200625	-0.10375	-0.055625
	1760	-0.295	-0.09375	-0.055625
	1765	-0.35625	-0.0925	-0.059375
	1770	-0.410625	-0.08375	-0.0575
	1775	-0.44625	-0.085625	-0.05625
	1780	-0.4725	-0.08125	-0.056875
	1785	-0.495	-0.078125	-0.056875
	1790	-0.510625	-0.07125	-0.059375
	1795	-0.52125	-0.071875	-0.0575
	1800	-0.526875	-0.0675	-0.0575
	1805	-0.530625	-0.06625	-0.0575
	1810	-0.53875	-0.061875	-0.0575
	1815	-0.53875	-0.059375	-0.05625
	1820	-0.54625	-0.06	-0.055
	1825	-0.548125	-0.055625	-0.056875
	1830	-0.54625	-0.055625	-0.0575
	1835	-0.546875	-0.056875	-0.058125
	1840	-0.55125	-0.058125	-0.058125
	1845	-0.54875	-0.056875	-0.05875
	1850	-0.549375	-0.0575	-0.05625
	1855	-0.5525	-0.05625	-0.05625
	1860	-0.553125	-0.05375	-0.055625
	1865	-0.551875	-0.05125	-0.0525
	1870	-0.5525	-0.05375	-0.054375
	1875	-0.55375	-0.056875	-0.05375
	1880	-0.55625	-0.060625	-0.05625
	1885	-0.554375	-0.065	-0.050625
	1890	-0.56	-0.069375	-0.055625
	1895	-0.555625	-0.075625	-0.05125
	1900	-0.55125	-0.085	-0.054375
	1905	-0.555	-0.09	-0.05375
	1910	-0.553125	-0.099375	-0.053125
	1915	-0.55	-0.106875	-0.05125
	1920	-0.556875	-0.121875	-0.050625
	1925	-0.553125	-0.13125	-0.050625
	1930	-0.555	-0.141875	-0.051875
	1935	-0.55125	-0.15125	-0.050625
	1940	-0.551875	-0.16	-0.051875
	1945	-0.555	-0.16625	-0.054375
	1950	-0.5525	-0.17625	-0.054375
	1955	-0.55	-0.181875	-0.049375
	1960	-0.55625	-0.19125	-0.050625
	1965	-0.551875	-0.198125	-0.05125
	1970	-0.55125	-0.206875	-0.05
	1975	-0.5475	-0.209375	-0.048125
	1980	-0.55	-0.215	-0.055
	1985	-0.550625	-0.221875	-0.049375
	1990	-0.555	-0.224375	-0.0525
	1995	-0.55	-0.230625	-0.050625
	2000	-0.55125	-0.230625	-0.046875
	2005	-0.5525	-0.234375	-0.0475
	2010	-0.54875	-0.236875	-0.0475
	2015	-0.54875	-0.243125	-0.049375
	2020	-0.553125	-0.25125	-0.048125
	2025	-0.555625	-0.25	-0.050625
	2030	-0.551875	-0.251875	-0.051875
	2035	-0.551875	-0.25375	-0.048125
	2040	-0.550625	-0.250625	-0.0475
	2045	-0.550625	-0.254375	-0.048125
	2050	-0.553125	-0.26125	-0.050625
	2055	-0.55625	-0.256875	-0.04875
	2060	-0.55125	-0.261875	-0.045625
	2065	-0.550625	-0.264375	-0.049375
	2070	-0.553125	-0.2675	-0.04375
	2075	-0.551875	-0.26875	-0.04875
	2080	-0.55	-0.27125	-0.049375
	2085	-0.554375	-0.268125	-0.046875
	2090	-0.5575	-0.271875	-0.045
	2095	-0.550625	-0.269375	-0.0475
	2100	-0.550625	-0.268125	-0.050625
	2105	-0.5525	-0.27125	-0.0475
	2110	-0.55375	-0.266875	-0.04875
	2115	-0.54875	-0.27	-0.044375
	2120	-0.550625	-0.266875	-0.04625
	2125	-0.553125	-0.266875	-0.0475
	2130	-0.551875	-0.270625	-0.045
	2135	-0.5525	-0.271875	-0.045
	2140	-0.5525	-0.2725	-0.044375
	2145	-0.55375	-0.2675	-0.04375
	2150	-0.55	-0.273125	-0.045625
	2155	-0.55125	-0.28	-0.04375
	2160	-0.550625	-0.27375	-0.045
	2165	-0.554375	-0.27625	-0.041875
	2170	-0.555	-0.2775	-0.044375
	2175	-0.55375	-0.27625	-0.043125
	2180	-0.554375	-0.2775	-0.04625
	2185	-0.5475	-0.27375	-0.048125
	2190	-0.5525	-0.2725	-0.04625
	2195	-0.55125	-0.27	-0.04375
	2200	-0.54875	-0.27375	-0.045
	2205	-0.551875	-0.27375	-0.0425
	2210	-0.54875	-0.275	-0.04625
	2215	-0.5475	-0.278125	-0.048125
	2220	-0.550625	-0.27375	-0.04375
	2225	-0.5525	-0.276875	-0.04625
	2230	-0.5525	-0.2775	-0.043125
	2235	-0.55125	-0.276875	-0.045
	2240	-0.55375	-0.27125	-0.04375
	2245	-0.55375	-0.275625	-0.044375
	2250	-0.550625	-0.275625	-0.04125
	2255	-0.55125	-0.274375	-0.041875
	2260	-0.5525	-0.285625	-0.043125
	2265	-0.55375	-0.279375	-0.045
	2270	-0.553125	-0.279375	-0.0425
	2275	-0.54875	-0.28	-0.04375
	2280	-0.54875	-0.280625	-0.041875
	2285	-0.549375	-0.281875	-0.04625
	2290	-0.551875	-0.27625	-0.045625
	2295	-0.54875	-0.27875	-0.04625
	2300	-0.550625	-0.283125	-0.045
	2305	-0.553125	-0.283125	-0.043125
	2310	-0.551875	-0.281875	-0.049375
	2315	-0.551875	-0.280625	-0.0475
	2320	-0.55	-0.28375	-0.04625
	2325	-0.55375	-0.274375	-0.04375
	2330	-0.5525	-0.278125	-0.045625
	2335	-0.55125	-0.2825	-0.046875
	2340	-0.549375	-0.281875	-0.043125
	2345	-0.554375	-0.281875	-0.046875
	2350	-0.55	-0.281875	-0.04625
	2355	-0.54875	-0.275625	-0.04625
	2360	-0.55375	-0.27	-0.046875
	2365	-0.549375	-0.27875	-0.044375
	2370	-0.55125	-0.2775	-0.0425
	2375	-0.555	-0.27	-0.04625
	2380	-0.550625	-0.276875	-0.045
	2385	-0.55	-0.27125	-0.044375
	2390	-0.550625	-0.27375	-0.03875
	2395	-0.54875	-0.273125	-0.043125
	2400	-0.54875	-0.27375	-0.0425
	2405	-0.5525	-0.27375	-0.045625
	2410	-0.55125	-0.275	-0.040625
	2415	-0.54875	-0.278125	-0.041875
	2420	-0.544375	-0.2775	-0.038125
	2425	-0.54875	-0.271875	-0.04125
	2430	-0.55	-0.270625	-0.04375
	2435	-0.549375	-0.274375	-0.04
	2440	-0.545625	-0.27	-0.041875
	2445	-0.54625	-0.27	-0.044375
	2450	-0.549375	-0.26875	-0.0425
	2455	-0.545625	-0.27125	-0.04375
	2460	-0.54875	-0.26875	-0.0425
	2465	-0.55125	-0.26875	-0.040625
	2470	-0.55	-0.268125	-0.036875
	2475	-0.548125	-0.273125	-0.038125
	2480	-0.549375	-0.270625	-0.036875
	2485	-0.5475	-0.269375	-0.040625
	2490	-0.549375	-0.268125	-0.04
	2495	-0.5475	-0.26625	-0.04
	2500	-0.549375	-0.269375	-0.036875
	2505	-0.55	-0.26125	-0.039375
	2510	-0.550625	-0.259375	-0.039375
	2515	-0.55	-0.2575	-0.034375
	2520	-0.545625	-0.26625	-0.03875
	2525	-0.553125	-0.264375	-0.038125
	2530	-0.55125	-0.265625	-0.04125
	2535	-0.5475	-0.269375	-0.04
	2540	-0.550625	-0.263125	-0.039375
	2545	-0.54625	-0.263125	-0.03875
	2550	-0.548125	-0.26625	-0.040625
	2555	-0.548125	-0.263125	-0.038125
	2560	-0.55	-0.265	-0.03875
	2565	-0.549375	-0.260625	-0.038125
	2570	-0.549375	-0.260625	-0.03625
	2575	-0.550625	-0.2575	-0.034375
	2580	-0.545	-0.261875	-0.038125
	2585	-0.55125	-0.25375	-0.04
	2590	-0.5475	-0.2575	-0.03875
	2595	-0.545625	-0.256875	-0.039375
	2600	-0.545	-0.260625	-0.036875
	2605	-0.54875	-0.2625	-0.040625
	2610	-0.549375	-0.256875	-0.041875
	2615	-0.549375	-0.26125	-0.04
	2620	-0.5425	-0.25875	-0.03875
	2625	-0.549375	-0.25875	-0.038125
	2630	-0.54875	-0.26	-0.04
	2635	-0.549375	-0.26	-0.040625
	2640	-0.548125	-0.26	-0.039375
	2645	-0.545	-0.25875	-0.040625
	2650	-0.5475	-0.260625	-0.039375
	2655	-0.54375	-0.259375	-0.0425
	2660	-0.5475	-0.256875	-0.04125
	2665	-0.54	-0.2575	-0.040625
	2670	-0.5475	-0.255	-0.036875
	2675	-0.548125	-0.25625	-0.036875
	2680	-0.55	-0.25375	-0.039375
	2685	-0.54375	-0.258125	-0.03875
	2690	-0.5425	-0.25625	-0.038125
	2695	-0.543125	-0.25125	-0.04125
	2700	-0.545	-0.26	-0.03875
	2705	-0.54375	-0.255	-0.0375
	2710	-0.545	-0.25	-0.04
	2715	-0.545625	-0.253125	-0.045
	2720	-0.544375	-0.255	-0.04125
	2725	-0.546875	-0.253125	-0.041875
	2730	-0.541875	-0.253125	-0.04125
	2735	-0.54625	-0.255625	-0.039375
	2740	-0.546875	-0.255	-0.03625
	2745	-0.5475	-0.24625	-0.040625
	2750	-0.544375	-0.250625	-0.04
	2755	-0.543125	-0.251875	-0.04125
	2760	-0.5475	-0.249375	-0.040625
	2765	-0.54125	-0.24875	-0.03875
	2770	-0.54375	-0.248125	-0.03875
	2775	-0.544375	-0.250625	-0.04
	2780	-0.54375	-0.249375	-0.040625
	2785	-0.544375	-0.250625	-0.03625
	2790	-0.544375	-0.24875	-0.039375
	2795	-0.545625	-0.24875	-0.036875
	2800	-0.545	-0.248125	-0.035625
	2805	-0.545625	-0.246875	-0.03875
	2810	-0.546875	-0.2425	-0.038125
	2815	-0.5425	-0.241875	-0.03875
	2820	-0.546875	-0.244375	-0.03625
	2825	-0.54375	-0.24875	-0.035625
	2830	-0.54625	-0.245625	-0.039375
	2835	-0.545625	-0.249375	-0.04
	2840	-0.54625	-0.24875	-0.04
	2845	-0.5425	-0.25	-0.036875
	2850	-0.544375	-0.244375	-0.03875
	2855	-0.545625	-0.24625	-0.04
	2860	-0.54625	-0.239375	-0.04125
	2865	-0.54375	-0.2375	-0.04125
	2870	-0.544375	-0.24	-0.03625
	2875	-0.546875	-0.241875	-0.039375
	2880	-0.544375	-0.243125	-0.039375
	2885	-0.544375	-0.24125	-0.036875
	2890	-0.54625	-0.234375	-0.036875
	2895	-0.541875	-0.235625	-0.035625
	2900	-0.54125	-0.2375	-0.03625
	2905	-0.54125	-0.236875	-0.03625
	2910	-0.541875	-0.236875	-0.03875
	2915	-0.54375	-0.23375	-0.0375
	2920	-0.540625	-0.235	-0.04
	2925	-0.545625	-0.234375	-0.0375
	2930	-0.54625	-0.2275	-0.04
	2935	-0.545625	-0.22875	-0.03875
	2940	-0.54125	-0.229375	-0.03875
	2945	-0.544375	-0.2325	-0.0425
	2950	-0.5475	-0.22875	-0.0425
	2955	-0.54375	-0.23	-0.039375
	2960	-0.545625	-0.23125	-0.038125
	2965	-0.541875	-0.2275	-0.03875
	2970	-0.54375	-0.225	-0.040625
	2975	-0.54375	-0.2275	-0.03875
	2980	-0.541875	-0.2275	-0.03875
	2985	-0.5425	-0.22625	-0.035625
	2990	-0.54375	-0.226875	-0.039375
	2995	-0.541875	-0.225625	-0.04125
	3000	-0.545	-0.23	-0.041875
	3005	-0.545625	-0.229375	-0.04
	3010	-0.5475	-0.224375	-0.04
	3015	-0.541875	-0.224375	-0.038125
	3020	-0.5425	-0.228125	-0.0375
	3025	-0.541875	-0.23	-0.04
	3030	-0.54	-0.2275	-0.04125
	3035	-0.544375	-0.223125	-0.0375
	3040	-0.545625	-0.22	-0.040625
	3045	-0.543125	-0.2225	-0.04125
	3050	-0.54	-0.2275	-0.0425
	3055	-0.539375	-0.22	-0.04
	3060	-0.540625	-0.2175	-0.04
	3065	-0.5375	-0.223125	-0.043125
	3070	-0.54	-0.223125	-0.038125
	3075	-0.5425	-0.22125	-0.039375
	3080	-0.54125	-0.223125	-0.038125
	3085	-0.53875	-0.22375	-0.04125
	3090	-0.543125	-0.224375	-0.04
	3095	-0.53875	-0.22125	-0.03875
	3100	-0.53875	-0.225	-0.03875
	3105	-0.53875	-0.22	-0.040625
	3110	-0.54375	-0.221875	-0.03875
	3115	-0.538125	-0.223125	-0.039375
	3120	-0.541875	-0.220625	-0.038125
	3125	-0.540625	-0.2175	-0.039375
	3130	-0.544375	-0.223125	-0.036875
	3135	-0.540625	-0.2275	-0.038125
	3140	-0.541875	-0.22375	-0.0375
	3145	-0.54	-0.220625	-0.035625
	3150	-0.540625	-0.223125	-0.0375
	3155	-0.536875	-0.21875	-0.0325
	3160	-0.54125	-0.2225	-0.0375
	3165	-0.538125	-0.21875	-0.0325
	3170	-0.53625	-0.216875	-0.036875
	3175	-0.54125	-0.22125	-0.03875
	3180	-0.54	-0.2175	-0.0375
	3185	-0.54	-0.220625	-0.039375
	3190	-0.53625	-0.21625	-0.0375
	3195	-0.539375	-0.219375	-0.034375
	3200	-0.54125	-0.215625	-0.036875
	3205	-0.53375	-0.219375	-0.03875
	3210	-0.538125	-0.215625	-0.034375
	3215	-0.5375	-0.216875	-0.03625
	3220	-0.534375	-0.215	-0.034375
	3225	-0.538125	-0.220625	-0.0375
	3230	-0.53625	-0.213125	-0.04125
	3235	-0.534375	-0.2175	-0.038125
	3240	-0.5375	-0.216875	-0.04125
	3245	-0.539375	-0.218125	-0.040625
	3250	-0.536875	-0.21875	-0.035625
	3255	-0.538125	-0.21625	-0.03625
	3260	-0.535625	-0.21625	-0.035625
	3265	-0.539375	-0.2175	-0.03625
	3270	-0.53625	-0.215	-0.0375
	3275	-0.5375	-0.2175	-0.036875
	3280	-0.535625	-0.215625	-0.039375
	3285	-0.540625	-0.218125	-0.0375
	3290	-0.541875	-0.219375	-0.04
	3295	-0.5375	-0.2175	-0.04
	3300	-0.535625	-0.219375	-0.036875
	3305	-0.53625	-0.218125	-0.039375
	3310	-0.53875	-0.218125	-0.039375
	3315	-0.5375	-0.211875	-0.04
	3320	-0.54	-0.2175	-0.040625
	3325	-0.53625	-0.214375	-0.04375
	3330	-0.54	-0.21375	-0.04125
	3335	-0.5375	-0.219375	-0.0425
	3340	-0.536875	-0.218125	-0.0375
	3345	-0.540625	-0.215	-0.039375
	3350	-0.536875	-0.2125	-0.039375
	3355	-0.536875	-0.21125	-0.0375
	3360	-0.538125	-0.21375	-0.04
	3365	-0.53375	-0.21125	-0.0375
	3370	-0.535	-0.21125	-0.035625
	3375	-0.5375	-0.210625	-0.035
	3380	-0.536875	-0.209375	-0.0375
	3385	-0.54125	-0.210625	-0.036875
	3390	-0.538125	-0.20875	-0.035625
	3395	-0.54125	-0.21	-0.03625
	3400	-0.53625	-0.209375	-0.039375
	3405	-0.5375	-0.208125	-0.038125
	3410	-0.540625	-0.21625	-0.035625
	3415	-0.536875	-0.210625	-0.04
	3420	-0.536875	-0.211875	-0.03875
	3425	-0.540625	-0.206875	-0.038125
	3430	-0.54	-0.20125	-0.034375
	3435	-0.538125	-0.2075	-0.035625
	3440	-0.540625	-0.203125	-0.034375
	3445	-0.535	-0.2025	-0.031875
	3450	-0.538125	-0.2025	-0.035625
	3455	-0.536875	-0.208125	-0.036875
	3460	-0.535625	-0.2	-0.03875
	3465	-0.534375	-0.20375	-0.04
	3470	-0.535625	-0.204375	-0.039375
	3475	-0.531875	-0.206875	-0.03625
	3480	-0.535625	-0.204375	-0.039375
	3485	-0.536875	-0.204375	-0.035
	3490	-0.53625	-0.20375	-0.03875
	3495	-0.536875	-0.20125	-0.03625
	3500	-0.533125	-0.2025	-0.036875
	3505	-0.538125	-0.203125	-0.03375
	3510	-0.534375	-0.205625	-0.035
	3515	-0.5375	-0.204375	-0.038125
	3520	-0.534375	-0.19625	-0.035
	3525	-0.533125	-0.201875	-0.03375
	3530	-0.5375	-0.200625	-0.035625
	3535	-0.535	-0.199375	-0.038125
	3540	-0.5375	-0.195625	-0.035
	3545	-0.53375	-0.1975	-0.039375
	3550	-0.535625	-0.19875	-0.0375
	3555	-0.534375	-0.198125	-0.036875
	3560	-0.5375	-0.198125	-0.034375
	3565	-0.534375	-0.2	-0.034375
	3570	-0.539375	-0.19625	-0.034375
	3575	-0.53875	-0.1925	-0.0325
	3580	-0.538125	-0.190625	-0.03375
	3585	-0.53625	-0.193125	-0.038125
	3590	-0.53625	-0.2	-0.035
	3595	-0.538125	-0.1925	-0.036875
	3600	-0.536875	-0.19625	-0.033125
	3605	-0.534375	-0.19375	-0.033125
	3610	-0.536875	-0.18875	-0.03875
	3615	-0.534375	-0.194375	-0.035625
	3620	-0.53625	-0.194375	-0.034375
	3625	-0.53875	-0.191875	-0.035
	3630	-0.535625	-0.18875	-0.035
	3635	-0.5325	-0.19125	-0.03625
	3640	-0.54375	-0.189375	-0.035625
	3645	-0.538125	-0.195	-0.035625
	3650	-0.535	-0.191875	-0.035625
	3655	-0.538125	-0.19125	-0.034375
	3660	-0.535625	-0.188125	-0.034375
	3665	-0.5325	-0.1875	-0.03625
	3670	-0.535	-0.19125	-0.03625
	3675	-0.538125	-0.18875	-0.03375
	3680	-0.535625	-0.19	-0.035625
	3685	-0.535	-0.188125	-0.03625
	3690	-0.5375	-0.190625	-0.035
	3695	-0.539375	-0.188125	-0.03375
	3700	-0.5375	-0.189375	-0.031875
	3705	-0.5375	-0.18625	-0.035625
	3710	-0.536875	-0.18125	-0.036875
	3715	-0.53625	-0.18875	-0.035
	3720	-0.540625	-0.185625	-0.034375
	3725	-0.539375	-0.189375	-0.035
	3730	-0.535	-0.19	-0.035625
	3735	-0.535625	-0.190625	-0.0325
	3740	-0.539375	-0.185	-0.03375
	3745	-0.5325	-0.184375	-0.035625
	3750	-0.53625	-0.18625	-0.03625
	3755	-0.533125	-0.18	-0.0325
	3760	-0.53375	-0.181875	-0.03375
	3765	-0.531875	-0.18625	-0.034375
	3770	-0.534375	-0.18125	-0.036875
	3775	-0.535625	-0.183125	-0.038125
	3780	-0.535	-0.178125	-0.038125
	3785	-0.53625	-0.181875	-0.036875
	3790	-0.53625	-0.1725	-0.036875
	3795	-0.53	-0.178125	-0.0375
	3800	-0.5375	-0.181875	-0.034375
	3805	-0.530625	-0.180625	-0.036875
	3810	-0.536875	-0.17375	-0.035625
	3815	-0.53375	-0.17375	-0.035625
	3820	-0.538125	-0.176875	-0.035
	3825	-0.536875	-0.17625	-0.03625
	3830	-0.533125	-0.17625	-0.03625
	3835	-0.53625	-0.175625	-0.03375
	3840	-0.53625	-0.173125	-0.033125
	3845	-0.531875	-0.173125	-0.03125
	3850	-0.529375	-0.17375	-0.03625
	3855	-0.53625	-0.171875	-0.03375
	3860	-0.535	-0.168125	-0.038125
	3865	-0.53375	-0.17125	-0.035
	3870	-0.5325	-0.16875	-0.036875
	3875	-0.533125	-0.17	-0.035625
	3880	-0.531875	-0.16875	-0.035625
	3885	-0.535625	-0.17125	-0.03125
	3890	-0.535	-0.1725	-0.035625
	3895	-0.531875	-0.169375	-0.035625
	3900	-0.528125	-0.17125	-0.034375
	3905	-0.535	-0.175625	-0.034375
	3910	-0.529375	-0.17125	-0.0325
	3915	-0.528125	-0.171875	-0.03375
	3920	-0.53125	-0.169375	-0.03125
	3925	-0.535	-0.170625	-0.03375
	3930	-0.53	-0.17625	-0.035
	3935	-0.53	-0.17125	-0.033125
	3940	-0.53125	-0.17	-0.03375
	3945	-0.53	-0.17375	-0.034375
	3950	-0.53125	-0.175	-0.03375
	3955	-0.530625	-0.17375	-0.033125
	3960	-0.529375	-0.17125	-0.03
	3965	-0.531875	-0.173125	-0.033125
	3970	-0.529375	-0.16875	-0.034375
	3975	-0.53125	-0.168125	-0.0325
	3980	-0.530625	-0.16625	-0.03125
	3985	-0.534375	-0.17125	-0.0325
	3990	-0.535625	-0.171875	-0.03
	3995	-0.528125	-0.168125	-0.030625
	4000	-0.531875	-0.170625	-0.030625
	4005	-0.533125	-0.170625	-0.028125
	4010	-0.529375	-0.16625	-0.033125
	4015	-0.52375	-0.168125	-0.028125
	4020	-0.52875	-0.166875	-0.029375
	4025	-0.5325	-0.163125	-0.03
	4030	-0.53125	-0.16625	-0.034375
	4035	-0.534375	-0.1675	-0.031875
	4040	-0.53375	-0.166875	-0.03125
	4045	-0.53125	-0.168125	-0.026875
	4050	-0.5275	-0.16375	-0.030625
	4055	-0.530625	-0.165	-0.029375
	4060	-0.53	-0.16125	-0.029375
	4065	-0.528125	-0.16375	-0.030625
	4070	-0.529375	-0.1675	-0.03125
	4075	-0.5325	-0.163125	-0.02875
	4080	-0.528125	-0.16	-0.03125
	4085	-0.529375	-0.16125	-0.035625
	4090	-0.531875	-0.16	-0.03125
	4095	-0.530625	-0.163125	-0.030625
	4100	-0.5275	-0.160625	-0.031875
	4105	-0.530625	-0.15875	-0.0325
	4110	-0.530625	-0.154375	-0.0325
	4115	-0.531875	-0.151875	-0.034375
	4120	-0.531875	-0.156875	-0.0325
	4125	-0.5325	-0.155625	-0.033125
	4130	-0.528125	-0.155	-0.0325
	4135	-0.528125	-0.16375	-0.03
	4140	-0.533125	-0.15875	-0.03375
	4145	-0.53	-0.159375	-0.03625
	4150	-0.53	-0.158125	-0.03375
	4155	-0.529375	-0.1575	-0.031875
	4160	-0.53	-0.158125	-0.031875
	4165	-0.529375	-0.16	-0.033125
	4170	-0.5325	-0.158125	-0.03125
	4175	-0.533125	-0.158125	-0.034375
	4180	-0.53125	-0.156875	-0.031875
	4185	-0.530625	-0.15875	-0.031875
	4190	-0.528125	-0.155625	-0.029375
	4195	-0.528125	-0.15375	-0.033125
	4200	-0.531875	-0.15875	-0.03125
	4205	-0.52875	-0.155	-0.028125
	4210	-0.53125	-0.158125	-0.031875
	4215	-0.53	-0.155625	-0.03125
	4220	-0.52875	-0.151875	-0.033125
	4225	-0.529375	-0.151875	-0.034375
	4230	-0.5275	-0.1525	-0.0325
	4235	-0.5275	-0.15625	-0.03
	4240	-0.53	-0.154375	-0.03
	4245	-0.524375	-0.15375	-0.035625
	4250	-0.5275	-0.155625	-0.030625
	4255	-0.5275	-0.15125	-0.033125
	4260	-0.5275	-0.1525	-0.03125
	4265	-0.525	-0.155625	-0.033125
	4270	-0.526875	-0.15125	-0.031875
	4275	-0.525625	-0.155	-0.034375
	4280	-0.52875	-0.151875	-0.031875
	4285	-0.52875	-0.151875	-0.03375
	4290	-0.530625	-0.149375	-0.03375
	4295	-0.531875	-0.150625	-0.033125
	4300	-0.528125	-0.149375	-0.033125
	4305	-0.53	-0.148125	-0.039375
	4310	-0.528125	-0.146875	-0.036875
	4315	-0.529375	-0.146875	-0.0375
	4320	-0.531875	-0.153125	-0.038125
	4325	-0.5275	-0.15125	-0.038125
	4330	-0.528125	-0.149375	-0.041875
	4335	-0.530625	-0.14875	-0.035
	4340	-0.52875	-0.149375	-0.03375
	4345	-0.5275	-0.15	-0.035625
	4350	-0.525	-0.1525	-0.039375
	4355	-0.525	-0.158125	-0.035625
	4360	-0.528125	-0.148125	-0.03375
	4365	-0.52875	-0.1475	-0.036875
	4370	-0.530625	-0.15	-0.03625
	4375	-0.5275	-0.148125	-0.0375
	4380	-0.526875	-0.151875	-0.036875
	4385	-0.52375	-0.149375	-0.03625
	4390	-0.5275	-0.151875	-0.03375
	4395	-0.52625	-0.15	-0.033125
	4400	-0.529375	-0.15125	-0.035625
	4405	-0.526875	-0.149375	-0.03625
	4410	-0.530625	-0.149375	-0.034375
	4415	-0.52875	-0.1525	-0.034375
	4420	-0.5275	-0.145	-0.03375
	4425	-0.529375	-0.144375	-0.035
	4430	-0.5275	-0.145	-0.031875
	4435	-0.526875	-0.14375	-0.0325
	4440	-0.529375	-0.141875	-0.034375
	4445	-0.525625	-0.140625	-0.03
	4450	-0.53125	-0.14375	-0.0325
	4455	-0.52625	-0.14125	-0.033125
	4460	-0.528125	-0.14125	-0.03125
	4465	-0.525	-0.140625	-0.03375
	4470	-0.52625	-0.14125	-0.030625
	4475	-0.53	-0.1375	-0.031875
	4480	-0.525	-0.1375	-0.0325
	4485	-0.5275	-0.143125	-0.0325
	4490	-0.526875	-0.14	-0.034375
	4495	-0.53	-0.136875	-0.035
	4500	-0.5275	-0.139375	-0.031875
	4505	-0.52875	-0.138125	-0.03625
	4510	-0.529375	-0.13875	-0.0325
	4515	-0.525625	-0.1325	-0.036875
	4520	-0.52625	-0.139375	-0.038125
	4525	-0.52875	-0.139375	-0.034375
	4530	-0.5275	-0.134375	-0.03375
	4535	-0.52625	-0.14	-0.03625
	4540	-0.526875	-0.134375	-0.03375
	4545	-0.52875	-0.135	-0.03125
	4550	-0.52625	-0.1375	-0.03375
	4555	-0.5275	-0.134375	-0.02875
	4560	-0.520625	-0.134375	-0.03625
	4565	-0.52375	-0.139375	-0.035
	4570	-0.5275	-0.138125	-0.03375
	4575	-0.525625	-0.1375	-0.034375
	4580	-0.528125	-0.133125	-0.035
	4585	-0.53125	-0.13375	-0.0325
	4590	-0.526875	-0.135625	-0.030625
	4595	-0.53	-0.133125	-0.03
	4600	-0.52125	-0.138125	-0.0325
	4605	-0.528125	-0.138125	-0.030625
	4610	-0.525	-0.138125	-0.035
	4615	-0.524375	-0.138125	-0.0325
	4620	-0.529375	-0.138125	-0.034375
	4625	-0.52875	-0.135625	-0.035625
	4630	-0.528125	-0.13375	-0.034375
	4635	-0.52625	-0.1375	-0.03375
	4640	-0.525625	-0.138125	-0.0325
	4645	-0.525625	-0.1325	-0.03125
	4650	-0.525	-0.13375	-0.031875
	4655	-0.5225	-0.128125	-0.035
	4660	-0.525625	-0.1325	-0.031875
	4665	-0.524375	-0.136875	-0.0325
	4670	-0.5225	-0.1375	-0.031875
	4675	-0.519375	-0.133125	-0.030625
	4680	-0.525625	-0.135625	-0.030625
	4685	-0.5225	-0.135	-0.031875
	4690	-0.52625	-0.138125	-0.030625
	4695	-0.520625	-0.136875	-0.031875
	4700	-0.52	-0.130625	-0.030625
	4705	-0.52375	-0.135	-0.03375
	4710	-0.526875	-0.130625	-0.031875
	4715	-0.52125	-0.13375	-0.034375
	4720	-0.5225	-0.133125	-0.03375
	4725	-0.525625	-0.13625	-0.03125
	4730	-0.525	-0.133125	-0.031875
	4735	-0.525	-0.140625	-0.03125
	4740	-0.525625	-0.136875	-0.033125
	4745	-0.526875	-0.13375	-0.031875
	4750	-0.526875	-0.134375	-0.034375
	4755	-0.525	-0.135625	-0.02875
	4760	-0.5275	-0.135	-0.031875
	4765	-0.525625	-0.135	-0.034375
	4770	-0.5275	-0.135625	-0.03375
	4775	-0.525625	-0.1325	-0.034375
	4780	-0.526875	-0.134375	-0.030625
	4785	-0.52875	-0.13375	-0.030625
	4790	-0.528125	-0.131875	-0.03
	4795	-0.525625	-0.134375	-0.0325
	4800	-0.5225	-0.13375	-0.030625
	4805	-0.526875	-0.135	-0.03
	4810	-0.525625	-0.131875	-0.030625
	4815	-0.524375	-0.1325	-0.02875
	4820	-0.525	-0.13	-0.0275
	4825	-0.526875	-0.129375	-0.02875
	4830	-0.523125	-0.1325	-0.034375
	4835	-0.525625	-0.1325	-0.03
	4840	-0.524375	-0.13125	-0.02625
	4845	-0.524375	-0.13	-0.0325
	4850	-0.524375	-0.1325	-0.031875
	4855	-0.525625	-0.1275	-0.031875
	4860	-0.524375	-0.13125	-0.0275
	4865	-0.52125	-0.13125	-0.031875
	4870	-0.525	-0.131875	-0.029375
	4875	-0.525625	-0.13125	-0.029375
	4880	-0.52875	-0.1275	-0.033125
	4885	-0.52625	-0.131875	-0.033125
	4890	-0.5275	-0.125625	-0.033125
	4895	-0.525	-0.131875	-0.035625
	4900	-0.525625	-0.13	-0.033125
	4905	-0.528125	-0.133125	-0.0325
	4910	-0.52	-0.129375	-0.0325
	4915	-0.523125	-0.12375	-0.033125
	4920	-0.526875	-0.125	-0.03375
	4925	-0.526875	-0.124375	-0.033125
	4930	-0.524375	-0.125625	-0.033125
	4935	-0.528125	-0.128125	-0.030625
	4940	-0.528125	-0.124375	-0.02875
	4945	-0.52625	-0.1275	-0.0325
	4950	-0.52375	-0.126875	-0.0325
	4955	-0.52875	-0.124375	-0.031875
	4960	-0.525625	-0.12375	-0.03375
	4965	-0.52375	-0.125625	-0.03375
	4970	-0.5275	-0.120625	-0.03375
	4975	-0.525	-0.12375	-0.03375
	4980	-0.528125	-0.125625	-0.034375
	4985	-0.524375	-0.12625	-0.03375
	4990	-0.525	-0.129375	-0.03
	4995	-0.525625	-0.123125	-0.03375
	5000	-0.524375	-0.129375	-0.0325
	5005	-0.52375	-0.1225	-0.031875
	5010	-0.520625	-0.12375	-0.033125
	5015	-0.524375	-0.128125	-0.0325
	5020	-0.524375	-0.128125	-0.03125
	5025	-0.524375	-0.12875	-0.03125
	5030	-0.523125	-0.1325	-0.030625
	5035	-0.52	-0.126875	-0.031875
	5040	-0.52375	-0.12625	-0.0325
	5045	-0.523125	-0.128125	-0.035
	5050	-0.526875	-0.12875	-0.033125
	5055	-0.520625	-0.12875	-0.0325
	5060	-0.52375	-0.125	-0.03375
	5065	-0.52125	-0.12375	-0.038125
	5070	-0.52125	-0.125	-0.03375
	5075	-0.519375	-0.121875	-0.036875
	5080	-0.525625	-0.1225	-0.034375
	5085	-0.521875	-0.12625	-0.034375
	5090	-0.524375	-0.12625	-0.035625
	5095	-0.526875	-0.12625	-0.035
	5100	-0.528125	-0.12625	-0.033125
	5105	-0.525	-0.12625	-0.0375
	5110	-0.52625	-0.125	-0.035625
	5115	-0.52375	-0.125625	-0.036875
	5120	-0.52125	-0.1275	-0.03375
	5125	-0.521875	-0.121875	-0.031875
	5130	-0.524375	-0.129375	-0.033125
	5135	-0.523125	-0.124375	-0.035
	5140	-0.526875	-0.125625	-0.035625
	5145	-0.521875	-0.129375	-0.031875
	5150	-0.521875	-0.12625	-0.033125
	5155	-0.520625	-0.134375	-0.031875
	5160	-0.5225	-0.125	-0.03625
	5165	-0.52	-0.1275	-0.035
	5170	-0.525	-0.125625	-0.034375
	5175	-0.523125	-0.121875	-0.030625
	5180	-0.5225	-0.12625	-0.034375
	5185	-0.523125	-0.125	-0.036875
	5190	-0.526875	-0.123125	-0.033125
	5195	-0.519375	-0.123125	-0.034375
	5200	-0.52	-0.1225	-0.034375
	5205	-0.52	-0.12125	-0.030625
	5210	-0.52125	-0.121875	-0.033125
	5215	-0.528125	-0.125625	-0.0375
	5220	-0.523125	-0.125625	-0.03625
	5225	-0.52125	-0.12375	-0.03625
	5230	-0.519375	-0.120625	-0.03625
	5235	-0.523125	-0.121875	-0.036875
	5240	-0.52	-0.12375	-0.034375
	5245	-0.518125	-0.121875	-0.031875
	5250	-0.521875	-0.123125	-0.0325
	5255	-0.5225	-0.125625	-0.034375
	5260	-0.519375	-0.1225	-0.034375
	5265	-0.523125	-0.12	-0.034375
	5270	-0.52	-0.126875	-0.03125
	5275	-0.52125	-0.121875	-0.035625
	5280	-0.521875	-0.11875	-0.035625
	5285	-0.52125	-0.124375	-0.033125
	5290	-0.52	-0.11875	-0.031875
	5295	-0.519375	-0.120625	-0.029375
	5300	-0.51875	-0.12125	-0.03375
	5305	-0.52	-0.120625	-0.031875
	5310	-0.520625	-0.125	-0.034375
	5315	-0.52	-0.121875	-0.033125
	5320	-0.52	-0.125	-0.03375
	5325	-0.521875	-0.1175	-0.03375
	5330	-0.52375	-0.11625	-0.0325
	5335	-0.521875	-0.11875	-0.033125
	5340	-0.51875	-0.116875	-0.033125
	5345	-0.52	-0.11625	-0.03375
	5350	-0.5225	-0.113125	-0.034375
	5355	-0.521875	-0.1175	-0.028125
	5360	-0.521875	-0.113125	-0.03375
	5365	-0.520625	-0.1125	-0.035
	5370	-0.519375	-0.119375	-0.033125
	5375	-0.5225	-0.12	-0.035625
	5380	-0.520625	-0.12	-0.033125
	5385	-0.51875	-0.12125	-0.034375
	5390	-0.51875	-0.11625	-0.03125
	5395	-0.520625	-0.116875	-0.0325
	5400	-0.520625	-0.108125	-0.03625
	5405	-0.51625	-0.116875	-0.03625
	5410	-0.520625	-0.116875	-0.034375
	5415	-0.515625	-0.121875	-0.035
	5420	-0.5225	-0.12125	-0.031875
	5425	-0.519375	-0.12	-0.0325
	5430	-0.5175	-0.120625	-0.0375
	5435	-0.52	-0.120625	-0.03375
	5440	-0.521875	-0.12	-0.034375
	5445	-0.51875	-0.121875	-0.034375
	5450	-0.521875	-0.12125	-0.03125
	5455	-0.5175	-0.120625	-0.031875
	5460	-0.5175	-0.11625	-0.03375
	5465	-0.518125	-0.119375	-0.0325
	5470	-0.521875	-0.118125	-0.031875
	5475	-0.518125	-0.1175	-0.033125
	5480	-0.51875	-0.11875	-0.0325
	5485	-0.518125	-0.121875	-0.03375
	5490	-0.518125	-0.120625	-0.029375
	5495	-0.5175	-0.116875	-0.03125
	5500	-0.51875	-0.11875	-0.02875
	5505	-0.519375	-0.12125	-0.033125
	5510	-0.518125	-0.118125	-0.03125
	5515	-0.515625	-0.11625	-0.031875
	5520	-0.51875	-0.11875	-0.033125
	5525	-0.516875	-0.111875	-0.029375
	5530	-0.515	-0.1175	-0.0325
	5535	-0.5175	-0.1125	-0.035625
	5540	-0.5175	-0.1125	-0.030625
	5545	-0.51375	-0.114375	-0.033125
	5550	-0.51625	-0.111875	-0.031875
	5555	-0.5175	-0.114375	-0.0325
	5560	-0.5125	-0.110625	-0.03125
	5565	-0.515625	-0.113125	-0.035
	5570	-0.5175	-0.11	-0.03375
	5575	-0.51875	-0.1075	-0.03625
	5580	-0.518125	-0.109375	-0.0375
	5585	-0.515625	-0.113125	-0.033125
	5590	-0.5175	-0.111875	-0.0325
	5595	-0.51375	-0.113125	-0.03125
	5600	-0.513125	-0.115	-0.03375
	5605	-0.518125	-0.1125	-0.033125
	5610	-0.515625	-0.115	-0.034375
	5615	-0.51625	-0.11625	-0.03375
	5620	-0.5125	-0.1125	-0.036875
	5625	-0.516875	-0.114375	-0.035625
	5630	-0.514375	-0.115	-0.03375
	5635	-0.51125	-0.116875	-0.034375
	5640	-0.515	-0.114375	-0.034375
	5645	-0.515625	-0.11625	-0.031875
	5650	-0.51625	-0.11625	-0.0325
	5655	-0.514375	-0.1125	-0.03125
	5660	-0.515	-0.115625	-0.031875
	5665	-0.515625	-0.11375	-0.0325
	5670	-0.513125	-0.1125	-0.031875
	5675	-0.51625	-0.11375	-0.033125
	5680	-0.513125	-0.115625	-0.033125
	5685	-0.515	-0.1175	-0.03625
	5690	-0.52125	-0.113125	-0.035625
	5695	-0.515	-0.1125	-0.033125
	5700	-0.513125	-0.114375	-0.035
	5705	-0.516875	-0.1125	-0.034375
	5710	-0.513125	-0.1125	-0.03375
	5715	-0.513125	-0.11	-0.030625
	5720	-0.51	-0.11	-0.02875
	5725	-0.51125	-0.10875	-0.03125
	5730	-0.515	-0.110625	-0.0325
	5735	-0.514375	-0.1075	-0.0325
	5740	-0.5175	-0.111875	-0.03
	5745	-0.515	-0.10875	-0.030625
	5750	-0.5125	-0.10875	-0.029375
	5755	-0.518125	-0.108125	-0.03
	5760	-0.515625	-0.104375	-0.0325
	5765	-0.514375	-0.1075	-0.03375
	5770	-0.513125	-0.108125	-0.030625
	5775	-0.51375	-0.106875	-0.0275
	5780	-0.51375	-0.1025	-0.03125
	5785	-0.514375	-0.099375	-0.0325
	5790	-0.511875	-0.10625	-0.029375
	5795	-0.511875	-0.1	-0.030625
	5800	-0.513125	-0.109375	-0.028125
	5805	-0.51375	-0.108125	-0.028125
	5810	-0.516875	-0.106875	-0.03
	5815	-0.5125	-0.105625	-0.03125
	5820	-0.518125	-0.108125	-0.033125
	5825	-0.514375	-0.105625	-0.03125
	5830	-0.51625	-0.103125	-0.0325
	5835	-0.515	-0.110625	-0.028125
	5840	-0.513125	-0.10625	-0.029375
	5845	-0.516875	-0.105	-0.029375
	5850	-0.5125	-0.108125	-0.031875
	5855	-0.514375	-0.108125	-0.031875
	5860	-0.511875	-0.10625	-0.03125
	5865	-0.513125	-0.109375	-0.031875
	5870	-0.511875	-0.108125	-0.03
	5875	-0.515	-0.10625	-0.03375
	5880	-0.5125	-0.1075	-0.03
	5885	-0.514375	-0.10875	-0.034375
	5890	-0.514375	-0.105	-0.025625
	5895	-0.51375	-0.1075	-0.033125
	5900	-0.511875	-0.108125	-0.03375
	5905	-0.5125	-0.1075	-0.030625
	5910	-0.514375	-0.108125	-0.030625
	5915	-0.510625	-0.101875	-0.02875
	5920	-0.51125	-0.105	-0.03125
	5925	-0.5125	-0.1025	-0.030625
	5930	-0.51625	-0.101875	-0.033125
	5935	-0.513125	-0.10125	-0.030625
	5940	-0.51625	-0.104375	-0.030625
	5945	-0.511875	-0.1	-0.03
	5950	-0.5125	-0.105625	-0.02875
	5955	-0.51	-0.1025	-0.030625
	5960	-0.5125	-0.101875	-0.0275
	5965	-0.515	-0.10125	-0.0325
	5970	-0.514375	-0.10125	-0.03375
	5975	-0.513125	-0.095625	-0.03
	5980	-0.51375	-0.099375	-0.035
	5985	-0.51375	-0.098125	-0.030625
	5990	-0.513125	-0.098125	-0.028125
	5995	-0.5125	-0.098125	-0.031875
	6000	-0.5125	-0.1	-0.03125
	6005	-0.511875	-0.100625	-0.033125
	6010	-0.511875	-0.10375	-0.031875
	6015	-0.511875	-0.101875	-0.03125
	6020	-0.51125	-0.104375	-0.030625
	6025	-0.513125	-0.0975	-0.031875
	6030	-0.513125	-0.099375	-0.03
	6035	-0.5125	-0.09625	-0.031875
	6040	-0.514375	-0.10125	-0.03
	6045	-0.515625	-0.101875	-0.031875
	6050	-0.5125	-0.1025	-0.030625
	6055	-0.511875	-0.104375	-0.029375
	6060	-0.5125	-0.09875	-0.035
	6065	-0.50875	-0.10125	-0.029375
	6070	-0.511875	-0.101875	-0.033125
	6075	-0.514375	-0.100625	-0.035
	6080	-0.5125	-0.100625	-0.035625
	6085	-0.5125	-0.098125	-0.03375
	6090	-0.510625	-0.098125	-0.035625
	6095	-0.50375	-0.09625	-0.034375
	6100	-0.5075	-0.09625	-0.031875
	6105	-0.508125	-0.099375	-0.031875
	6110	-0.50625	-0.0975	-0.03125
	6115	-0.508125	-0.096875	-0.033125
	6120	-0.505	-0.098125	-0.031875
	6125	-0.50625	-0.095625	-0.033125
	6130	-0.505625	-0.095	-0.03
	6135	-0.5075	-0.0975	-0.034375
	6140	-0.505	-0.099375	-0.03
	6145	-0.50625	-0.1	-0.030625
	6150	-0.505625	-0.095625	-0.0325
	6155	-0.505625	-0.09875	-0.03125
	6160	-0.509375	-0.099375	-0.02875
	6165	-0.508125	-0.095	-0.031875
	6170	-0.510625	-0.098125	-0.033125
	6175	-0.504375	-0.09625	-0.0325
	6180	-0.508125	-0.09625	-0.03125
	6185	-0.504375	-0.0975	-0.0325
	6190	-0.506875	-0.0975	-0.033125
	6195	-0.505625	-0.098125	-0.034375
	6200	-0.5075	-0.098125	-0.029375
	6205	-0.505	-0.098125	-0.03125
	6210	-0.50875	-0.094375	-0.028125
	6215	-0.51	-0.098125	-0.0325
	6220	-0.505625	-0.09375	-0.030625
	6225	-0.50625	-0.095625	-0.0325
	6230	-0.506875	-0.1	-0.03375
	6235	-0.50875	-0.09875	-0.0325
	6240	-0.50625	-0.0925	-0.03
	6245	-0.5025	-0.09625	-0.034375
	6250	-0.505	-0.1	-0.031875
	6255	-0.5075	-0.099375	-0.0325
	6260	-0.506875	-0.095	-0.03625
	6265	-0.50625	-0.090625	-0.03375
	6270	-0.50625	-0.0925	-0.033125
	6275	-0.504375	-0.09375	-0.0325
	6280	-0.505625	-0.09875	-0.034375
	6285	-0.50375	-0.0925	-0.035625
	6290	-0.508125	-0.095625	-0.035625
	6295	-0.505625	-0.090625	-0.035
	6300	-0.505	-0.08875	-0.031875
	6305	-0.5025	-0.089375	-0.031875
	6310	-0.505	-0.09375	-0.03375
	6315	-0.501875	-0.08875	-0.03375
	6320	-0.5025	-0.090625	-0.03125
	6325	-0.50375	-0.088125	-0.034375
	6330	-0.505625	-0.09	-0.031875
	6335	-0.501875	-0.090625	-0.035
	6340	-0.50625	-0.09	-0.03125
	6345	-0.50125	-0.09625	-0.034375
	6350	-0.503125	-0.095	-0.03375
	6355	-0.5025	-0.09375	-0.034375
	6360	-0.504375	-0.090625	-0.033125
	6365	-0.505	-0.09375	-0.030625
	6370	-0.50375	-0.09625	-0.030625
	6375	-0.503125	-0.0925	-0.031875
	6380	-0.498125	-0.094375	-0.03125
	6385	-0.501875	-0.091875	-0.033125
	6390	-0.503125	-0.09375	-0.031875
	6395	-0.503125	-0.08875	-0.030625
	6400	-0.5	-0.09125	-0.0325
	6405	-0.504375	-0.09125	-0.029375
	6410	-0.505625	-0.09125	-0.0325
	6415	-0.503125	-0.089375	-0.035
	6420	-0.50625	-0.0925	-0.030625
	6425	-0.505	-0.091875	-0.034375
	6430	-0.506875	-0.09	-0.033125
	6435	-0.504375	-0.0925	-0.03125
	6440	-0.506875	-0.088125	-0.03125
	6445	-0.50625	-0.08625	-0.031875
	6450	-0.501875	-0.093125	-0.03
	6455	-0.503125	-0.090625	-0.028125
	6460	-0.50125	-0.093125	-0.029375
	6465	-0.50375	-0.08875	-0.02625
	6470	-0.50375	-0.0875	-0.029375
	6475	-0.504375	-0.0875	-0.030625
	6480	-0.503125	-0.089375	-0.033125
	6485	-0.50375	-0.0925	-0.031875
	6490	-0.501875	-0.0875	-0.028125
	6495	-0.5025	-0.089375	-0.03125
	6500	-0.5075	-0.089375	-0.03125
	6505	-0.505	-0.091875	-0.026875
	6510	-0.50125	-0.091875	-0.031875
	6515	-0.505	-0.09	-0.0325
	6520	-0.5025	-0.091875	-0.028125
	6525	-0.50375	-0.08875	-0.029375
	6530	-0.501875	-0.091875	-0.028125
	6535	-0.498125	-0.086875	-0.03
	6540	-0.505	-0.09125	-0.031875
	6545	-0.500625	-0.089375	-0.031875
	6550	-0.5025	-0.09125	-0.029375
	6555	-0.505	-0.0925	-0.028125
	6560	-0.505625	-0.090625	-0.03125
	6565	-0.503125	-0.094375	-0.0325
	6570	-0.504375	-0.098125	-0.03125
	6575	-0.504375	-0.09125	-0.03
	6580	-0.5025	-0.0925	-0.026875
	6585	-0.505	-0.09375	-0.035
	6590	-0.508125	-0.0925	-0.03
	6595	-0.50375	-0.09375	-0.03
	6600	-0.50125	-0.0925	-0.03375
	6605	-0.500625	-0.091875	-0.029375
	6610	-0.50125	-0.089375	-0.035
	6615	-0.499375	-0.0925	-0.03125
	6620	-0.505625	-0.091875	-0.033125
	6625	-0.505	-0.090625	-0.035
	6630	-0.504375	-0.09125	-0.033125
	6635	-0.508125	-0.093125	-0.02875
	6640	-0.503125	-0.093125	-0.030625
	6645	-0.508125	-0.091875	-0.030625
	6650	-0.5025	-0.09	-0.031875
	6655	-0.501875	-0.09	-0.026875
	6660	-0.5025	-0.088125	-0.030625
	6665	-0.500625	-0.09	-0.03
	6670	-0.50625	-0.0925	-0.03125
	6675	-0.5025	-0.0925	-0.03
	6680	-0.503125	-0.094375	-0.034375
	6685	-0.505	-0.0925	-0.031875
	6690	-0.501875	-0.086875	-0.026875
	6695	-0.500625	-0.0875	-0.028125
	6700	-0.500625	-0.090625	-0.02625
	6705	-0.503125	-0.09125	-0.026875
	6710	-0.501875	-0.0875	-0.035
	6715	-0.500625	-0.083125	-0.029375
	6720	-0.503125	-0.089375	-0.028125
	6725	-0.50625	-0.08875	-0.02875
	6730	-0.50125	-0.08625	-0.030625
	6735	-0.500625	-0.0875	-0.030625
	6740	-0.504375	-0.08875	-0.02875
	6745	-0.503125	-0.081875	-0.031875
	6750	-0.50125	-0.08375	-0.03
	6755	-0.5	-0.08625	-0.03
	6760	-0.50625	-0.0875	-0.03
	6765	-0.49875	-0.08625	-0.028125
	6770	-0.4975	-0.086875	-0.02875
	6775	-0.501875	-0.08875	-0.030625
	6780	-0.50375	-0.0875	-0.03125
	6785	-0.50125	-0.086875	-0.026875
	6790	-0.501875	-0.09	-0.028125
	6795	-0.50125	-0.0875	-0.028125
	6800	-0.49875	-0.086875	-0.02875
	6805	-0.5	-0.090625	-0.028125
	6810	-0.501875	-0.09125	-0.0275
	6815	-0.503125	-0.0875	-0.02875
	6820	-0.5	-0.086875	-0.030625
	6825	-0.5025	-0.085625	-0.02875
	6830	-0.5025	-0.084375	-0.03
	6835	-0.5	-0.08625	-0.028125
	6840	-0.501875	-0.084375	-0.025625
	6845	-0.500625	-0.08375	-0.029375
	6850	-0.50125	-0.08375	-0.025
	6855	-0.498125	-0.08875	-0.025
	6860	-0.503125	-0.08625	-0.025625
	6865	-0.4975	-0.08625	-0.0275
	6870	-0.4975	-0.08625	-0.025625
	6875	-0.50125	-0.086875	-0.028125
	6880	-0.495625	-0.088125	-0.0275
	6885	-0.50125	-0.085625	-0.02625
	6890	-0.5	-0.0875	-0.0275
	6895	-0.4975	-0.090625	-0.02625
	6900	-0.4975	-0.08625	-0.026875
	6905	-0.49625	-0.085625	-0.024375
	6910	-0.498125	-0.086875	-0.025
	6915	-0.4975	-0.090625	-0.0275
	6920	-0.500625	-0.089375	-0.026875
	6925	-0.499375	-0.093125	-0.025
	6930	-0.499375	-0.093125	-0.028125
	6935	-0.5025	-0.0875	-0.026875
	6940	-0.5	-0.090625	-0.02875
	6945	-0.495	-0.09375	-0.03
	6950	-0.4925	-0.091875	-0.025625
	6955	-0.499375	-0.088125	-0.021875
	6960	-0.496875	-0.09125	-0.025625
	6965	-0.49875	-0.091875	-0.026875
	6970	-0.495625	-0.08875	-0.02875
	6975	-0.501875	-0.09	-0.02625
	6980	-0.496875	-0.09	-0.0275
	6985	-0.5	-0.085625	-0.02625
	6990	-0.5075	-0.0875	-0.025625
	6995	-0.500625	-0.09	-0.02625
	7000	-0.499375	-0.090625	-0.025
	7005	-0.4975	-0.089375	-0.02375
	7010	-0.50125	-0.089375	-0.025625
	7015	-0.50125	-0.09125	-0.025625
	7020	-0.498125	-0.08875	-0.025625
	7025	-0.499375	-0.08375	-0.029375
	7030	-0.501875	-0.09125	-0.0275
	7035	-0.5	-0.09	-0.023125
	7040	-0.496875	-0.093125	-0.025625
	7045	-0.499375	-0.089375	-0.024375
	7050	-0.5	-0.0875	-0.02375
	7055	-0.4975	-0.088125	-0.020625
	7060	-0.49875	-0.08625	-0.0225
	7065	-0.495625	-0.09	-0.02
	7070	-0.499375	-0.09125	-0.02125
	7075	-0.5025	-0.09	-0.025
	7080	-0.5	-0.08875	-0.026875
	7085	-0.499375	-0.084375	-0.026875
	7090	-0.49875	-0.08625	-0.025
	7095	-0.49875	-0.08375	-0.02375
	7100	-0.4975	-0.086875	-0.021875
	7105	-0.499375	-0.085	-0.023125
	7110	-0.496875	-0.086875	-0.026875
	7115	-0.494375	-0.083125	-0.026875
	7120	-0.495625	-0.085	-0.025625
	7125	-0.499375	-0.086875	-0.02375
	7130	-0.495625	-0.08875	-0.02375
	7135	-0.495	-0.08375	-0.023125
	7140	-0.49625	-0.0875	-0.020625
	7145	-0.49875	-0.088125	-0.026875
	7150	-0.496875	-0.086875	-0.025625
	7155	-0.4975	-0.08375	-0.025
	7160	-0.499375	-0.086875	-0.02625
	7165	-0.495625	-0.08375	-0.026875
	7170	-0.5025	-0.085	-0.02
	7175	-0.500625	-0.081875	-0.021875
	7180	-0.5	-0.08125	-0.021875
	7185	-0.500625	-0.08375	-0.024375
	7190	-0.496875	-0.0825	-0.02375
	7195	-0.496875	-0.08	-0.023125
	7200	-0.499375	-0.085	-0.024375
	7205	-0.495	-0.084375	-0.0225
	7210	-0.4975	-0.08375	-0.021875
	7215	-0.495	-0.08125	-0.026875
	7220	-0.49875	-0.086875	-0.026875
	7225	-0.4975	-0.080625	-0.023125
	7230	-0.49375	-0.083125	-0.025625
	7235	-0.49875	-0.081875	-0.025
	7240	-0.496875	-0.083125	-0.02375
	7245	-0.494375	-0.080625	-0.023125
	7250	-0.496875	-0.086875	-0.024375
	7255	-0.491875	-0.0875	-0.024375
	7260	-0.495	-0.084375	-0.025
	7265	-0.491875	-0.08375	-0.025625
	7270	-0.4925	-0.080625	-0.0275
	7275	-0.495625	-0.081875	-0.02625
	7280	-0.499375	-0.085	-0.02625
	7285	-0.4975	-0.085625	-0.025625
	7290	-0.495	-0.0875	-0.024375
	7295	-0.495	-0.080625	-0.028125
	7300	-0.491875	-0.0875	-0.024375
	7305	-0.490625	-0.0875	-0.024375
	7310	-0.49375	-0.079375	-0.026875
	7315	-0.49	-0.08625	-0.025
	7320	-0.49125	-0.0875	-0.023125
	7325	-0.4975	-0.086875	-0.025
	7330	-0.49375	-0.084375	-0.02375
	7335	-0.494375	-0.085625	-0.02375
	7340	-0.49875	-0.085625	-0.023125
	7345	-0.495	-0.084375	-0.025
	7350	-0.495625	-0.086875	-0.024375
	7355	-0.494375	-0.08375	-0.025625
	7360	-0.49375	-0.085625	-0.02375
	7365	-0.4925	-0.085625	-0.02125
	7370	-0.494375	-0.086875	-0.01875
	7375	-0.499375	-0.086875	-0.02375
	7380	-0.4925	-0.083125	-0.02375
	7385	-0.493125	-0.084375	-0.0225
	7390	-0.494375	-0.085625	-0.0225
	7395	-0.4925	-0.08	-0.020625
	7400	-0.493125	-0.085	-0.025
	7405	-0.4925	-0.08125	-0.021875
	7410	-0.4925	-0.0825	-0.025625
	7415	-0.496875	-0.081875	-0.025625
	7420	-0.4925	-0.080625	-0.025
	7425	-0.494375	-0.080625	-0.02375
	7430	-0.493125	-0.079375	-0.026875
	7435	-0.49375	-0.08375	-0.025625
	7440	-0.4975	-0.08	-0.026875
	7445	-0.49625	-0.081875	-0.02375
	7450	-0.488125	-0.084375	-0.025625
	7455	-0.49125	-0.084375	-0.023125
	7460	-0.490625	-0.07875	-0.025625
	7465	-0.490625	-0.085625	-0.025625
	7470	-0.49125	-0.0775	-0.024375
	7475	-0.49875	-0.078125	-0.024375
	7480	-0.49	-0.078125	-0.026875
	7485	-0.49125	-0.081875	-0.025
	7490	-0.495	-0.08375	-0.02625
	7495	-0.49375	-0.080625	-0.024375
	7500	-0.493125	-0.081875	-0.026875
	7505	-0.494375	-0.07875	-0.025625
	7510	-0.4975	-0.0775	-0.02875
	7515	-0.49375	-0.081875	-0.024375
	7520	-0.49375	-0.08375	-0.02125
	7525	-0.491875	-0.079375	-0.023125
	7530	-0.491875	-0.08125	-0.025
	7535	-0.49375	-0.08125	-0.025625
	7540	-0.495625	-0.08375	-0.02375
	7545	-0.4925	-0.0825	-0.0275
	7550	-0.49125	-0.086875	-0.0225
	7555	-0.496875	-0.0875	-0.021875
	7560	-0.495625	-0.08375	-0.02375
	7565	-0.495625	-0.084375	-0.02625
	7570	-0.495625	-0.078125	-0.02375
	7575	-0.4925	-0.081875	-0.025
	7580	-0.491875	-0.0825	-0.024375
	7585	-0.493125	-0.081875	-0.023125
	7590	-0.49625	-0.084375	-0.02375
	7595	-0.495	-0.0825	-0.025
	7600	-0.49625	-0.07875	-0.02375
	7605	-0.495625	-0.08875	-0.024375
	7610	-0.494375	-0.08375	-0.02625
	7615	-0.49125	-0.084375	-0.025625
	7620	-0.491875	-0.0875	-0.02375
	7625	-0.49375	-0.083125	-0.023125
	7630	-0.49	-0.081875	-0.025625
	7635	-0.4925	-0.088125	-0.026875
	7640	-0.495625	-0.08125	-0.028125
	7645	-0.4925	-0.085625	-0.026875
	7650	-0.489375	-0.088125	-0.025
	7655	-0.490625	-0.085	-0.026875
	7660	-0.4925	-0.086875	-0.026875
	7665	-0.489375	-0.0875	-0.026875
	7670	-0.49125	-0.084375	-0.024375
	7675	-0.49125	-0.083125	-0.02375
	7680	-0.49125	-0.08625	-0.023125
	7685	-0.491875	-0.08625	-0.02375
	7690	-0.49375	-0.08875	-0.02625
	7695	-0.488125	-0.084375	-0.025625
	7700	-0.49375	-0.085	-0.025
	7705	-0.489375	-0.08125	-0.025
	7710	-0.49375	-0.083125	-0.023125
	7715	-0.49125	-0.080625	-0.02375
	7720	-0.49125	-0.08	-0.02625
	7725	-0.49125	-0.081875	-0.024375
	7730	-0.48875	-0.08125	-0.023125
	7735	-0.4925	-0.080625	-0.024375
	7740	-0.494375	-0.085625	-0.023125
	7745	-0.49375	-0.080625	-0.02625
	7750	-0.49	-0.078125	-0.0275
	7755	-0.495	-0.08	-0.02375
	7760	-0.494375	-0.086875	-0.025625
	7765	-0.49125	-0.083125	-0.021875
	7770	-0.49	-0.08375	-0.0225
	7775	-0.49	-0.080625	-0.0225
	7780	-0.490625	-0.08	-0.02875
	7785	-0.491875	-0.078125	-0.025
	7790	-0.491875	-0.0825	-0.02625
	7795	-0.488125	-0.079375	-0.026875
	7800	-0.4875	-0.07875	-0.02375
	7805	-0.48875	-0.080625	-0.021875
	7810	-0.489375	-0.08125	-0.0275
	7815	-0.490625	-0.0775	-0.02625
	7820	-0.494375	-0.080625	-0.026875
	7825	-0.49	-0.07875	-0.0275
	7830	-0.490625	-0.08	-0.026875
	7835	-0.491875	-0.081875	-0.02625
	7840	-0.48875	-0.076875	-0.0275
	7845	-0.49125	-0.076875	-0.0275
	7850	-0.49125	-0.080625	-0.026875
	7855	-0.488125	-0.07625	-0.02875
	7860	-0.4925	-0.07875	-0.02625
	7865	-0.491875	-0.078125	-0.0275
	7870	-0.495625	-0.073125	-0.029375
	7875	-0.4925	-0.07625	-0.03
	7880	-0.493125	-0.078125	-0.02875
	7885	-0.488125	-0.074375	-0.0275
	7890	-0.423125	-0.08375	-0.029375
	7895	-0.445625	-0.125	-0.024375
	7900	-0.49375	-0.07375	-0.033125
	7905	-0.4825	-0.07375	-0.025
	7910	-0.479375	-0.071875	-0.024375
	7915	-0.466875	-0.069375	-0.019375
	7920	-0.45875	-0.0675	-0.02375
	7925	-0.4575	-0.07	-0.028125
	7930	-0.45125	-0.073125	-0.029375
	7935	-0.456875	-0.073125	-0.029375
	7940	-0.46625	-0.07125	-0.025625
	7945	-0.4675	-0.0725	-0.026875
	7950	-0.471875	-0.075625	-0.02875
	7955	-0.480625	-0.07	-0.024375
	7960	-0.483125	-0.076875	-0.024375
	7965	-0.480625	-0.076875	-0.026875
	7970	-0.484375	-0.07625	-0.02375
	7975	-0.48625	-0.075	-0.025
	7980	-0.486875	-0.07875	-0.02875
	7985	-0.48875	-0.074375	-0.024375
	7990	-0.486875	-0.07625	-0.024375
	7995	-0.48875	-0.07875	-0.028125
	8000	-0.48875	-0.07875	-0.025625
	8005	-0.488125	-0.0775	-0.0275
	8010	-0.489375	-0.0775	-0.02625
	8015	-0.486875	-0.078125	-0.025
	8020	-0.489375	-0.073125	-0.028125
	8025	-0.48625	-0.071875	-0.02625
	8030	-0.489375	-0.073125	-0.0275
	8035	-0.48625	-0.074375	-0.02625
	8040	-0.486875	-0.075	-0.02375
	8045	-0.488125	-0.075	-0.02875
	8050	-0.485	-0.075625	-0.028125
	8055	-0.491875	-0.07625	-0.02625
	8060	-0.49	-0.075	-0.025625
	8065	-0.48625	-0.07375	-0.02875
	8070	-0.489375	-0.070625	-0.02625
	8075	-0.490625	-0.075625	-0.026875
	8080	-0.49125	-0.073125	-0.02625
	8085	-0.4875	-0.071875	-0.024375
	8090	-0.4925	-0.068125	-0.02875
	8095	-0.485	-0.074375	-0.028125
	8100	-0.49	-0.0775	-0.025625
	8105	-0.49	-0.079375	-0.025
	8110	-0.49	-0.076875	-0.03
	8115	-0.48625	-0.07375	-0.0275
	8120	-0.485	-0.074375	-0.02625
	8125	-0.48875	-0.073125	-0.0275
	8130	-0.493125	-0.075	-0.030625
	8135	-0.489375	-0.0775	-0.025
	8140	-0.489375	-0.079375	-0.024375
	8145	-0.488125	-0.074375	-0.0275
	8150	-0.486875	-0.0775	-0.025625
	8155	-0.490625	-0.078125	-0.025
	8160	-0.491875	-0.078125	-0.02375
	8165	-0.491875	-0.07625	-0.026875
	8170	-0.49125	-0.079375	-0.024375
	8175	-0.495	-0.080625	-0.021875
	8180	-0.491875	-0.07875	-0.0225
	8185	-0.49	-0.078125	-0.023125
	8190	-0.496875	-0.079375	-0.024375
	8195	-0.49375	-0.075	-0.021875
	8200	-0.49	-0.0775	-0.021875
	8205	-0.48625	-0.07375	-0.0225
	8210	-0.485625	-0.074375	-0.023125
	8215	-0.4875	-0.07875	-0.019375
	8220	-0.490625	-0.078125	-0.025625
	8225	-0.490625	-0.080625	-0.02375
	8230	-0.494375	-0.08	-0.02625
	8235	-0.491875	-0.08	-0.02875
	8240	-0.490625	-0.076875	-0.021875
	8245	-0.48625	-0.07625	-0.026875
	8250	-0.49	-0.07875	-0.024375
	8255	-0.494375	-0.075625	-0.023125
	8260	-0.489375	-0.0775	-0.02375
	8265	-0.486875	-0.076875	-0.023125
	8270	-0.493125	-0.078125	-0.025625
	8275	-0.491875	-0.073125	-0.02375
	8280	-0.48875	-0.07375	-0.025
	8285	-0.486875	-0.08	-0.025
	8290	-0.48875	-0.076875	-0.024375
	8295	-0.48625	-0.075	-0.025
	8300	-0.485625	-0.0775	-0.025625
	8305	-0.4825	-0.078125	-0.02625
	8310	-0.486875	-0.079375	-0.026875
	8315	-0.485	-0.081875	-0.024375
	8320	-0.4875	-0.0775	-0.026875
	8325	-0.485	-0.0775	-0.02375
	8330	-0.479375	-0.076875	-0.0225
	8335	-0.481875	-0.073125	-0.021875
	8340	-0.47875	-0.078125	-0.025625
	8345	-0.479375	-0.078125	-0.0225
	8350	-0.480625	-0.07625	-0.028125
	8355	-0.48	-0.079375	-0.025
	8360	-0.4775	-0.0775	-0.0275
	8365	-0.470625	-0.07875	-0.02625
	8370	-0.468125	-0.074375	-0.025
	8375	-0.465625	-0.07375	-0.024375
	8380	-0.465	-0.07875	-0.02625
	8385	-0.463125	-0.074375	-0.026875
	8390	-0.46125	-0.07375	-0.02375
	8395	-0.458125	-0.0725	-0.025625
	8400	-0.451875	-0.07125	-0.028125
	8405	-0.45125	-0.075625	-0.025
	8410	-0.446875	-0.071875	-0.026875
	8415	-0.441875	-0.07125	-0.0275
	8420	-0.440625	-0.075625	-0.02625
	8425	-0.444375	-0.06875	-0.025
	8430	-0.43875	-0.075625	-0.02875
	8435	-0.438125	-0.0725	-0.02625
	8440	-0.43625	-0.070625	-0.026875
	8445	-0.429375	-0.07125	-0.025625
	8450	-0.4325	-0.071875	-0.02875
	8455	-0.428125	-0.071875	-0.025625
	8460	-0.43125	-0.070625	-0.026875
	8465	-0.425625	-0.07125	-0.025625
	8470	-0.42625	-0.0725	-0.026875
	8475	-0.426875	-0.071875	-0.02625
	8480	-0.423125	-0.074375	-0.025625
	8485	-0.424375	-0.0725	-0.026875
	8490	-0.426875	-0.07125	-0.030625
	8495	-0.42125	-0.0725	-0.0275
	8500	-0.425	-0.076875	-0.03125
	8505	-0.419375	-0.075	-0.026875
	8510	-0.415625	-0.074375	-0.029375
	8515	-0.410625	-0.074375	-0.03
	8520	-0.413125	-0.078125	-0.03
	8525	-0.40875	-0.07125	-0.02875
	8530	-0.40625	-0.073125	-0.025625
	8535	-0.399375	-0.073125	-0.026875
	8540	-0.3975	-0.07125	-0.025625
	8545	-0.394375	-0.069375	-0.028125
	8550	-0.386875	-0.073125	-0.026875
	8555	-0.385625	-0.071875	-0.02875
	8560	-0.37875	-0.07125	-0.02625
	8565	-0.375625	-0.07125	-0.028125
	8570	-0.366875	-0.06875	-0.023125
	8575	-0.366875	-0.070625	-0.021875
	8580	-0.360625	-0.069375	-0.026875
	8585	-0.35625	-0.069375	-0.026875
	8590	-0.3525	-0.07125	-0.025
	8595	-0.345625	-0.070625	-0.0275
	8600	-0.340625	-0.06875	-0.025
	8605	-0.33375	-0.074375	-0.025625
	8610	-0.33	-0.071875	-0.026875
	8615	-0.32	-0.070625	-0.028125
	8620	-0.32125	-0.079375	-0.029375
	8625	-0.32125	-0.074375	-0.0275
	8630	-0.314375	-0.0725	-0.02625
	8635	-0.305	-0.07375	-0.029375
	8640	-0.30875	-0.076875	-0.024375
	8645	-0.298125	-0.074375	-0.030625
	8650	-0.29625	-0.07375	-0.03125
	8655	-0.290625	-0.073125	-0.03
	8660	-0.290625	-0.07375	-0.02875
	8665	-0.283125	-0.074375	-0.030625
	8670	-0.284375	-0.073125	-0.02625
	8675	-0.2775	-0.068125	-0.029375
	8680	-0.270625	-0.06875	-0.026875
	8685	-0.27125	-0.074375	-0.029375
	8690	-0.265625	-0.075625	-0.02875
	8695	-0.259375	-0.07125	-0.03
	8700	-0.25375	-0.0725	-0.029375
	8705	-0.2525	-0.07125	-0.02625
	8710	-0.2525	-0.075	-0.0275
	8715	-0.24875	-0.076875	-0.028125
	8720	-0.24375	-0.07625	-0.025625
	8725	-0.239375	-0.07375	-0.02625
	8730	-0.238125	-0.074375	-0.023125
	8735	-0.236875	-0.071875	-0.026875
	8740	-0.2325	-0.0725	-0.02625
	8745	-0.223125	-0.07125	-0.024375
	8750	-0.225625	-0.07375	-0.02875
	8755	-0.225	-0.074375	-0.026875
	8760	-0.215625	-0.06625	-0.024375
	8765	-0.21375	-0.066875	-0.02625
	8770	-0.208125	-0.06875	-0.024375
	8775	-0.208125	-0.0675	-0.0275
	8780	-0.20375	-0.06375	-0.0225
	8785	-0.201875	-0.06625	-0.02375
	8790	-0.2	-0.065625	-0.02375
	8795	-0.1975	-0.0625	-0.02375
	8800	-0.186875	-0.06125	-0.0225
	8805	-0.188125	-0.063125	-0.025625
	8810	-0.18625	-0.065	-0.026875
	8815	-0.18125	-0.06625	-0.029375
	8820	-0.178125	-0.0625	-0.024375
	8825	-0.180625	-0.060625	-0.0225
	8830	-0.169375	-0.063125	-0.026875
	8835	-0.175625	-0.065	-0.025625
	8840	-0.17	-0.064375	-0.028125
	8845	-0.163125	-0.063125	-0.026875
	8850	-0.16375	-0.065625	-0.0275
	8855	-0.15875	-0.065	-0.02875
	8860	-0.15625	-0.064375	-0.025625
	8865	-0.15375	-0.064375	-0.025625
	8870	-0.1525	-0.064375	-0.02625
	8875	-0.151875	-0.06125	-0.024375
	8880	-0.14875	-0.065625	-0.0275
	8885	-0.145	-0.063125	-0.0275
	8890	-0.14	-0.061875	-0.02375
	8895	-0.1425	-0.06625	-0.030625
	8900	-0.13625	-0.065	-0.028125
	8905	-0.135	-0.06625	-0.029375
	8910	-0.134375	-0.064375	-0.030625
	8915	-0.130625	-0.065625	-0.029375
	8920	-0.12875	-0.05875	-0.026875
	8925	-0.12875	-0.06	-0.02875
	8930	-0.123125	-0.06375	-0.026875
	8935	-0.125	-0.0625	-0.03
	8940	-0.120625	-0.06375	-0.02875
	8945	-0.119375	-0.063125	-0.02625
	8950	-0.115625	-0.060625	-0.0275
	8955	-0.116875	-0.06125	-0.028125
	8960	-0.111875	-0.05875	-0.02875
	8965	-0.11125	-0.06125	-0.029375
	8970	-0.1075	-0.06125	-0.03
	8975	-0.10875	-0.065	-0.026875
	8980	-0.106875	-0.060625	-0.03
	8985	-0.105625	-0.06125	-0.028125
	8990	-0.103125	-0.06	-0.028125
	8995	-0.10375	-0.06125	-0.03125
	9000	-0.101875	-0.060625	-0.029375
	9005	-0.101875	-0.059375	-0.031875
	9010	-0.099375	-0.06	-0.031875
	9015	-0.095	-0.056875	-0.031875
	9020	-0.0975	-0.058125	-0.030625
	9025	-0.0975	-0.054375	-0.03
	9030	-0.095	-0.0575	-0.030625
	9035	-0.09125	-0.056875	-0.03125
	9040	-0.09375	-0.058125	-0.034375
	9045	-0.091875	-0.059375	-0.02875
	9050	-0.091875	-0.06	-0.029375
	9055	-0.090625	-0.05875	-0.025
	9060	-0.088125	-0.056875	-0.026875
	9065	-0.085	-0.06	-0.0275
	9070	-0.0875	-0.05875	-0.029375
	9075	-0.08625	-0.059375	-0.026875
	9080	-0.085625	-0.05875	-0.029375
	9085	-0.0825	-0.056875	-0.02875
	9090	-0.085625	-0.056875	-0.03
	9095	-0.084375	-0.053125	-0.03
	9100	-0.085	-0.058125	-0.03
	9105	-0.0825	-0.056875	-0.025
	9110	-0.081875	-0.053125	-0.02875
	9115	-0.080625	-0.06125	-0.026875
	9120	-0.08125	-0.0625	-0.0275
	9125	-0.07875	-0.05375	-0.03125
	9130	-0.075	-0.059375	-0.030625
	9135	-0.07875	-0.056875	-0.028125
	9140	-0.075	-0.05125	-0.029375
	9145	-0.075625	-0.055625	-0.03125
	9150	-0.07625	-0.053125	-0.02625
	9155	-0.075	-0.056875	-0.02875
	9160	-0.076875	-0.055	-0.029375
	9165	-0.0725	-0.053125	-0.030625
	9170	-0.0725	-0.053125	-0.030625
	9175	-0.069375	-0.050625	-0.029375
	9180	-0.071875	-0.053125	-0.028125
	9185	-0.068125	-0.0525	-0.03
	9190	-0.074375	-0.0525	-0.029375
	9195	-0.06875	-0.054375	-0.028125
	9200	-0.06875	-0.0575	-0.030625
	9205	-0.07	-0.055625	-0.03
	9210	-0.07125	-0.05375	-0.030625
	9215	-0.068125	-0.054375	-0.030625
	9220	-0.07125	-0.051875	-0.02875
	9225	-0.06875	-0.05	-0.0275
	9230	-0.066875	-0.048125	-0.02625
	9235	-0.06625	-0.05125	-0.0275
	9240	-0.068125	-0.05	-0.02875
	9245	-0.06875	-0.055	-0.029375
	9250	-0.066875	-0.05	-0.03125
	9255	-0.06625	-0.05125	-0.03
	9260	-0.064375	-0.053125	-0.02875
	9265	-0.065	-0.051875	-0.029375
	9270	-0.060625	-0.0525	-0.029375
	9275	-0.060625	-0.0525	-0.0275
[truncated: 68 more rows]
