# Supplementary material for: Conserved allosteric inhibition mechanism in SLC1 transporters
Source: eLife. 2023 Mar 1;12:e83464. doi: 10.7554/eLife.83464 (PMC10017108; doi:10.7554/eLife.83464)
Supplement: Figure 4—figure supplement 1—source data 1. [file elife-83464-fig4-figsupp1-data1.xlsx]

## Sheet: Sheet1
Figure S4 original data		EAAT1 Voltage Dependence (absence of Glu)
Figure S4A	EAAT1 V-jump no ucph (absence of Glu)											Figure S4B	EAAT1 V-jump plus ucph (absence of Glu)												Figure S4C	current-voltage relationship
		Current(pA)												Current(pA)
	time(ms)	trace1	trace2	trace3	trace4	trace5	trace6	trace7	trace8	trace9			time(ms)	trace1	trace2	trace3	trace4	trace5	trace6	trace7	trace8	trace9				Relative Current (n=12)
	0	1.5	1.5	1.75	-2.25	-0.25	-1	1	-0.25	0			0	3	1	-0.25	-1	-0.75	-1.25	1	0.75	1.75		no UCPH	Voltage (mV)	exp1	exp2	exp3	exp4	exp5	exp6	exp7	exp8	exp9	exp10	exp11	exp12		ave	std
	0.04	0.25	2.5	0	-0.75	-1.25	-0.25	1	-0.25	-0.5			0.04	2.5	1.5	-1.5	-1.25	-1.75	-1.75	-0.5	1.25	1.25			-100	0.869872	0.473604	0.447742	0.637837	0.915604			0.655717			0.14137	0.360225		0.562746	0.259907
	0.08	0.5	1.5	-2.25	-0.25	-1.75	-1	1.5	0.25	-1.5			0.08	1	0.5	-1.75	-0.75	-1.25	-1.75	0.5	0.75	1.25			-80	0.573636		0.36194	0.359251	0.611016	0.282064		0.454619						0.440421	0.135463
	0.12	0	0.25	-2.75	-1.5	-1.25	-0.75	1.25	-1.25	-1.5			0.12	-1.25	-1	-2.5	-1	-1.25	-1	2	-0.75	0.25			-60	0.209763	0.0408875	0.241811	0.172141	0.237923	0.282056	0.00776534	0.181533	0.322034	0.0785188	0.114344	0.00375612		0.157711	0.107636
	0.16	0.25	0.25	-1	-3	-0.25	-0.5	0.75	-1.25	-2			0.16	-1	-1.5	-1.25	-1.25	-0.25	-0.5	0.5	-1.5	-0.25			-40	-0.0231161	-0.12436	-0.107645	0.0478176	-0.0422019	0.0512889	-0.240319	-0.0203448	-0.050846	-0.0471103	-0.0207889	-0.153845		-0.0609559	0.0835411
	0.2	-0.25	0	1	-0.25	-0.5	-0.5	0.25	0	-1.25			0.2	-1.75	-0.5	0.25	1	-1	-0.75	-1	-1	-0.25			-20	-0.323632	-0.333905	-0.205929	-0.174221	-0.330281	-0.448718	-0.759719	-0.191704	-0.28813	-0.0194734	-0.124738	-0.275797		-0.289687	0.186192
	0.24	0.5	-0.75	2.75	2	-2.5	0	-1.5	-0.25	0.75			0.24	-1.25	-0.75	1	1.5	-1.25	0	-1.75	-1	0.25			0	-0.609594	-0.523002	-0.531987	-0.326403	-0.644656	-0.685911	-0.705464	-0.480442	-0.559314		-0.216214	-0.463417		-0.5224	0.148881
	0.28	0.25	-0.75	2.5	2.75	-2.75	0	-1	1	1.5			0.28	-1	0.25	0.75	0.75	-1.75	-0.75	-0.5	0	-0.5			20	-0.812507	-0.63544	-0.773796	-0.576715	-0.872789	-0.955148		-0.651803	-0.864398		-0.426194	-0.729833		-0.729862	0.159415
	0.32	0.5	-1.5	1.5	2.25	-0.25	-0.75	-0.25	1.25	0.75			0.32	0	1.5	-0.25	1.75	-2	-1	0	0	-0.75			40	-0.961476	-0.725723	-0.808113	-0.72266	-1.13212		-1.13953	-0.634586	-0.813556		-0.777545	-0.934334		-0.864965	0.172278
	0.36	0.5	-2	-0.5	0.5	0.25	-1.75	-1.5	0	0.5			0.36	-0.25	1.25	-1	1.75	-0.25	-1.5	-0.25	1	0.75			60	-1	-1	-1	-1	-1	-1	-1	-1	-1	-1	-1	-1		-1	0
	0.4	0.25	-1	-3	-1.75	-1	-1.25	-3	-0.25	-1			0.4	-0.5	1.25	-2	-0.25	0.25	-0.25	-2	0.25	0.5
	0.44	0	-0.25	-2	-1.5	-0.25	-0.5	-2.25	0	-2.75			0.44	-0.75	0.25	-0.25	-0.25	-0.75	-0.5	-2.5	-0.5	-0.5			-100	0.582535		0.419409		0.358035	0.151771								0.377938	0.178071
	0.48	0	-0.25	-0.5	0	1	-2	0	-0.25	-1.25			0.48	-0.25	-0.5	1	0.75	0.25	-0.75	-1.5	-0.5	0			-80	0.377131	0.128227	0.308294		0.0320322	0.0852402		0.705485						0.272735	0.250364
	0.52	0.5	-0.75	-0.25	-0.75	1.75	-2.25	3.75	0.25	0.25			0.52	0.25	-2	0.75	0	1.5	0.75	1	-1	0.25		plus UCPH	-60	0.184199	0.134622	0.131454	0.406775	-0.00439756	0.0852402		0.320208						0.179729	0.140535
	0.56	1.5	-1.75	-0.5	-1.75	1.5	-1.5	5.25	2	0			0.56	0.75	-3.75	-0.5	0.5	1.25	2.5	2	-0.25	-0.25			-40	0.0261963	0.211538	-0.0438179	-0.152539	0.00879374	-0.00831577	-0.0131321	0.0967482						0.0156839	0.105785
	0.6	2	-0.25	0.25	-0.5	-0.75	0	3	1.5	0			0.6	2	-2.5	-0.5	0	0	2	0	-0.25	0.25			-20	-0.158421	0.0320518	-0.13693	-0.474569	-0.0615565	-0.203744	-0.236396	-0.349318						-0.19861	0.159342
	0.64	-0.5	0.75	2	-0.25	-0.75	1.25	2.25	0.5	-0.5			0.64	1.25	-1	0.75	-0.25	0	1.5	0.5	-0.5	0.5			0	-0.279002	-0.29489	-0.356028	-0.59322	-0.0100466	-0.299379	-0.25516	-0.668669						-0.344549	0.205533
	0.68	-1.75	1	1.75	1	-0.75	1.75	0	-0.5	-0.5			0.68	0	-0.75	0.75	0	0.25	0.25	1.5	0.25	0.5			20	-0.426611	-0.333353	-0.475746	-0.923728		-0.401249	-0.559103							-0.519965	0.211728
	0.72	-1.75	0	1.25	2	-0.5	0.5	-0.75	-2.25	-1			0.72	-1.25	-1.5	-0.5	0	0.25	-1.75	2.25	-0.5	0.25			40	-0.629937	-0.108979	-0.545383	-1.05933		-0.424119		-1.07449						-0.640373	0.374769
	0.76	-0.5	0.5	0.75	-0.25	-0.25	-1	-1	-2.25	0.25			0.76	0.5	0	-1.75	-1.5	2	-3.25	1.25	-1.75	-0.25			60	-0.712265	-0.621807	-0.856027	-1.02545		-0.446985	-0.938081							-0.766769	0.214697
	0.8	-0.75	1.75	-0.25	-1.75	-0.25	-1.5	-1	-1.25	1.5			0.8	-0.25	2	-1	-1.5	1.5	-3	1.25	-1.75	-1
	0.84	0	1.25	0.75	-0.75	0.5	-1.25	0	-1	1			0.84	-1	2.25	-0.5	-0.75	1	-2	2.5	-1	-0.75
	0.88	1.75	1	1.5	-0.5	1	-0.25	0.25	-0.75	0.5			0.88	0	0.75	-1	0	0.5	-0.75	2.25	0.25	0.75
	0.92	2.5	-1.5	0.5	-0.25	1.75	0.75	-0.25	-0.75	-0.75			0.92	2	-1	-1	0	0	1	0.5	0.5	0.25
	0.96	1.25	-3.25	-0.5	1	1.75	0	-0.25	-0.5	-1.25			0.96	1.75	-1.75	-0.75	0.5	-0.5	1	-1	-0.5	-0.75
	1	1.25	-1.75	-0.75	1	1.75	-1.5	-0.5	0	0			1	0.5	0.25	-0.5	1.5	0.75	0	-2.25	-1.25	-0.25
	1.04	0	1.25	-0.75	0	0.75	-2.25	-0.75	-0.25	0.5			1.04	-0.5	1.5	0.25	0	1.75	-0.25	-0.25	-1	0.75
	1.08	-0.5	0.25	-1	-0.25	-1.75	0	-0.25	0.5	1			1.08	-0.5	1.75	0	-0.5	0	0.5	0.5	0.25	0.5
	1.12	-1.5	-0.75	-0.5	-0.5	-2.5	1.25	0	1.25	1.75			1.12	-1.75	1	-1	-0.5	-0.25	0.5	0.5	1.75	1
	1.16	-0.5	0.25	-0.5	0.75	-0.75	1.25	1	1.25	-0.75			1.16	-0.5	0.25	-0.75	-0.25	-0.5	-0.25	0.5	1.75	-0.75
	1.2	1.25	0.5	-0.25	1.25	0.75	0.75	0.75	1.75	-0.75			1.2	1	-1	0.25	-1	-1	1	0	0.75	-0.5
	1.24	1.25	-0.25	1	0.75	1	-0.5	-1.25	0.75	0.25			1.24	1.5	-1.5	2.75	-0.5	0	1	-0.75	-0.25	1.25
	1.28	0.5	-0.75	0.5	-1	0	-1.75	-2.5	0	-0.25			1.28	0.5	-0.75	2.5	-0.5	0.75	-1	-0.75	0	1
	1.32	0.25	-0.5	0.25	-0.25	-0.75	-2.25	-2.5	0.25	-1.75			1.32	-1	0.25	2	-0.25	1.5	-3.25	-0.25	0.25	-1.5
	1.36	0.25	0.5	0.75	-0.25	0.25	-1.5	-2	1.75	-2			1.36	-2.25	0.5	0.5	0	1	-2.25	0.75	0.5	-2.5
	1.4	-0.25	0	1	-0.75	0.75	0.5	-1	1.5	-1.5			1.4	-1.5	1	0.25	-0.75	1.25	0.25	0	-0.5	-3
	1.44	-1	-0.75	-0.5	-1	1	-0.25	-0.25	0.25	0			1.44	-1	0.25	-0.5	-2	1.25	1	0	-0.5	-1.25
	1.48	-2.5	-0.75	-1.25	0	0	-0.75	1.5	-0.25	1.5			1.48	-0.75	-1.75	-1.5	-1	0.25	1.75	0.5	0.25	0
	1.52	-3.5	-0.75	-0.25	0	-0.25	0	3	0.5	1			1.52	-0.5	-1.75	-2	0.5	-1	1.5	0.25	2	-0.25
	1.56	-2.5	-0.5	0.75	-0.5	-1	0	1.5	-1	-0.25			1.56	0	-1	-2	2.25	-1.25	-0.5	-0.75	2	-0.25
	1.6	-1.25	-1	1.25	-0.5	-0.75	-1	0.75	-1.5	-2.5			1.6	0	-0.25	-0.75	1.25	-0.25	-3	-0.75	-0.5	0.25
	1.64	1.25	-1.5	1	-1	-2.25	-0.5	1.5	0	-2.75			1.64	1	-0.75	0.75	-0.5	-1.25	-2.75	-0.25	-1.5	0.5
	1.68	2.5	0	0.5	-0.5	-2.75	0	-0.25	-0.25	0			1.68	3	-1	1.5	-0.5	-3	-1.25	-0.5	0	0.75
	1.72	2.25	1	0	-0.75	-2.5	-0.5	0	-1.75	0.5			1.72	2.5	-1	1.25	-2	-3.25	-0.75	0.25	1	-0.25
	1.76	1.25	0	-0.25	-2.25	-0.25	-1	-0.5	-0.75	-0.75			1.76	1.25	-0.5	1.25	-1.75	-1.25	-0.25	0.25	2	-1.5
	1.8	-0.25	-1.25	0.5	-1.5	0.25	-0.5	-1	-0.25	-0.5			1.8	0.25	-1	0	1.75	-0.25	0	-0.25	0.75	-1.25
	1.84	2	-1	1	0.25	-1	0.25	-0.5	-0.75	2			1.84	1.5	-1	0.5	3.5	-0.5	0.25	0.5	-2	0.5
	1.88	3.75	1.25	0.75	1	0	1	-0.5	-1.25	3.25			1.88	3.25	-0.5	2.25	2.25	0	2	1	-2	0.25
	1.92	3.5	2	0.75	1.75	2.75	-0.5	0	-1	1.75			1.92	3.75	-0.25	1.5	2.75	2	1	0.25	-2.5	0.25
	1.96	2.5	2	0.25	1.75	2	-1.5	0.5	0.5	0.25			1.96	2	0.25	-1.25	2	1.75	0.5	0	-1.75	-1
	2	1.5	0.75	-0.25	0	0	-0.5	0.75	1.25	-1			2	0.25	0.75	-0.25	0.25	1.75	1.5	0.5	0	-3
	2.04	2	0.25	-0.25	0.25	-1	-0.75	1.25	1.5	-1.75			2.04	-0.5	1	0.75	1	1.25	1.25	1.75	0.25	-2.75
	2.08	2	1	-1	0.25	-1.25	-1.25	2	0.5	-1			2.08	-1.5	1.75	-0.5	0.25	-0.25	1	2.5	0.25	-0.75
	2.12	0.25	2	-1.5	-0.25	-0.5	-1	1	-1.75	0.25			2.12	-1.5	2.25	-1.5	-0.5	-1	0.5	0.5	-0.25	1
	2.16	-1	1.5	0	0.75	1.75	0	-3	-3	0.5			2.16	-0.5	2.25	0	-0.75	0	-1	-2	-1.75	2.25
	2.2	-0.25	1.25	-0.75	0.75	3.25	1.5	-4.75	-2	0.75			2.2	0.75	2.75	0.25	-0.75	1.5	-1	-2.5	-2.25	1.75
	2.24	0.25	-0.5	-1.25	-0.5	3	0.5	-3	-1	-0.25			2.24	0.25	2	-0.75	0	1.25	-0.75	-0.25	-2.25	0.5
	2.28	-0.25	-1.25	0.75	-1	0.75	0.5	-1.25	-0.5	-2.25			2.28	0	0.75	-0.5	-0.25	-0.75	-1	0.75	-2	-0.5
	2.32	-2.75	-2.25	1.5	-3.75	-1	-0.25	1	-0.75	-1.5			2.32	0	0	0	-2.75	-1.5	-1.25	1.5	-2	-0.75
	2.36	-2.25	-2.5	1	-5	-1.5	-1.25	0.25	0	0			2.36	1	-2.25	0.25	-2.75	-0.5	-2	1.25	-1	-1
	2.4	0	-1.75	0.75	-1.5	-1.5	-1.25	-0.75	0.5	-0.25			2.4	0.5	-3.5	0.75	-0.75	0.5	-2	0.25	0.75	-1.5
	2.44	1.75	0.25	1	1.25	-0.5	-2	-0.25	1.5	-0.25			2.44	1.25	-2.25	2	1	0.75	-1.25	0.75	2.5	-1.25
	2.48	3	0.25	1.5	1	0.75	-1	0	1.75	-0.25			2.48	1.75	-0.5	1.5	0.75	0.25	0.5	0	2.5	0.5
	2.52	1.25	-1.75	1.75	1	0	0.25	0	0.5	0			2.52	-0.5	-0.75	1.5	0.75	-0.5	0	-1	1.5	2
	2.56	0	-1.5	0.5	2.75	0	0	0	-1	0.25			2.56	-1.25	-0.5	0.75	2.5	0	0	0.25	0.75	1.75
	2.6	1.5	-1	-0.5	1.25	-0.75	-1.25	-1	-1.5	-0.75			2.6	0	-1.25	0.75	1.25	0.75	-0.25	0	-0.25	1.25
	2.64	2.5	-0.5	-1.5	-0.25	-2.25	-1.5	-1.25	-0.5	-2			2.64	1.5	-1.5	0	0.25	-0.25	0	-0.5	-0.5	1
	2.68	0.75	-0.5	-1.25	-0.5	-2.5	-2.25	-0.25	0.75	-1.75			2.68	0.25	-0.25	-1.25	-0.75	-1	0	0.5	-0.5	2
	2.72	-0.25	0.5	-1	-0.5	-0.5	-1	-0.25	1.25	-1.25			2.72	-2	1.25	-3	-1.75	-0.5	0.25	1.5	0.25	2
	2.76	-0.25	-0.5	-1.75	-1.5	0.25	0.25	-1.25	0.25	-1			2.76	-3	0.25	-3.75	-1.25	-1	0.25	1	0.25	-0.5
	2.8	-0.75	-0.75	-2.5	-1.5	0.5	0.75	-2	-0.25	-2			2.8	-2.25	-0.25	-3.25	-0.25	-1.25	1.25	1	-1	-2
	2.84	0.25	0	-1	0.5	0.75	-1.25	-2.5	-0.5	-0.75			2.84	0.25	0.25	-2.5	0.75	-1	-0.25	-0.25	-0.25	-1
	2.88	1.25	0.75	-1	2	1.25	-2	-1	0	-0.5			2.88	1.25	0.5	0	0.25	0	-2.25	-0.25	1	-2.25
	2.92	0.75	1.75	-1.25	0.5	0.25	-1.75	1.5	-1.5	-1			2.92	0.75	1.25	0.5	-1.25	0.75	-2.75	0.25	0.5	-3.25
	2.96	0.75	3	-0.5	-2	-0.25	-0.75	0.75	-2.25	-1.75			2.96	1.5	1.5	0	-2	0.75	-1	0	-0.5	-3
	3	-0.25	2.5	0.25	-2.75	-1.5	0.5	-0.75	-1.25	-0.5			3	0.75	1.75	-0.25	-2.5	0	0.75	0	0.25	0
	3.04	-0.25	0.25	-0.75	-1.75	-1	0.5	-1.5	1.25	1.25			3.04	1	0.25	-0.25	-1.25	-1.25	0	0	0.75	2.25
	3.08	0.5	-1	-1.25	1.25	-0.25	1.5	-1	1.75	1			3.08	0.5	-0.25	-0.25	1	-1.75	-0.25	-0.5	0.25	0.75
	3.12	-0.25	-2	-2.5	1.5	0.25	2.25	0.75	1.25	-0.5			3.12	-0.5	-1.5	-0.25	1	-0.75	1	-0.75	0.75	-1.25
	3.16	-1.25	-0.75	-1	0.75	1	0.5	1.5	0.75	-0.5			3.16	-0.75	-1.75	0.75	0	0.25	1.25	-0.25	1.5	-1.5
	3.2	-1.5	0.5	1.25	0.75	0.5	-1.5	0.25	0	-0.25			3.2	-1	-1	2.25	0	1	1.25	1.25	1.5	-0.5
	3.24	-0.75	1.25	2	0.75	0.25	-0.75	-0.5	-0.75	-1.25			3.24	-0.75	2	1.5	0.5	-0.25	-0.5	1.25	0.75	0
	3.28	-0.5	0.25	1.5	0.25	1	2.25	-0.75	0	-1			3.28	-1.75	3.25	0	1.75	-0.75	0.25	0	-0.25	1.25
	3.32	0.5	-1.25	0.25	-2.25	0.75	2	-0.75	1.5	0			3.32	0	1.75	-0.25	0.5	0.5	0.5	-0.5	-1	1.25
	3.36	0.5	-0.5	-0.5	-3.75	0	-0.25	-0.5	0.5	0			3.36	2.25	1	-0.25	-2.75	1	0	-0.5	-1	0.75
	3.4	1	0	0	-3.5	0.25	-2	-0.25	-0.75	0.5			3.4	2.75	0.25	0.25	-3.5	1.25	-0.5	0	-1.75	1.75
	3.44	1.5	-0.75	0.5	-2.5	1.5	-3.5	-0.5	-0.5	1			3.44	1.75	-1	0	-2	1.75	-2	0.25	-1.5	1
	3.48	1.5	0	0.5	-0.75	1.5	-3.5	0.25	0.25	0.75			3.48	2	-2	0.25	0.25	1	-3.25	0.75	0.75	0.5
	3.52	1	-0.25	-0.25	0.25	-0.5	-3.75	0.25	0.25	-0.5			3.52	1.5	-2.5	0.25	0	0.5	-3.75	0.75	2	0.5
	3.56	0.5	-1	-0.25	0.5	-1.25	-2	0.75	-0.75	-1.25			3.56	-0.5	-1.5	0.25	-1	1.25	-2	1.5	0.5	0
	3.6	0.5	-1.25	-0.25	-1.25	-1.25	-0.75	-1.25	-1.5	-0.75			3.6	-0.75	0.25	0.25	-1.75	0.25	0.25	0.25	-0.25	-0.5
	3.64	-1	-1	0.25	-0.5	-0.75	0.75	-1.75	-1.25	-1.5			3.64	-1.5	0.5	0.75	0.75	-0.5	1.25	-0.5	0.75	-0.75
	3.68	-1.25	-1	0.75	-0.25	-2	1	0	-0.5	-1.75			3.68	-2.25	0.5	0.75	0.75	-0.75	1.75	0.5	1.75	-0.75
	3.72	0	-1.5	1.5	-1	-3.75	-0.5	1.25	0.75	-1.5			3.72	-1	0	1.5	-1.5	-1	0.75	1	1.5	-1.75
	3.76	-0.5	-2	0.25	-0.75	-3.25	-1	-0.75	-0.25	-0.75			3.76	0	-0.75	-0.75	-1.5	-1	0.75	1	0.75	-1.75
	3.8	-0.5	-1.25	-1.75	-0.5	-1.25	-2	-2.25	-2	0			3.8	-0.25	-0.75	-2.25	0.75	-1.75	0	-0.25	0	-0.75
	3.84	0.75	-1	-2.75	0.25	-1	-1.25	-2	-0.75	0			3.84	-0.25	-0.25	-2	1.5	-2.5	-0.25	-0.5	0.5	-0.25
	3.88	1.5	-1.25	-2.75	1	-1.25	-0.25	-1.5	0	-0.25			3.88	0.5	0	-1.25	0.25	-1.5	0.25	-2.5	0.25	0.25
	3.92	0	0	-1.5	0.5	-2.75	1.5	-0.5	-1.25	-1			3.92	-0.25	0.75	-0.75	-0.75	-0.5	0	-1.25	-1	0.5
	3.96	-1.5	1	0.5	0.5	-3.5	2.75	0.5	-2.5	-1.75			3.96	-0.25	0.25	0	0	-0.25	0.5	0.75	-2	-0.25
	4	-2.25	0.5	0.5	-0.25	-1.5	2	-0.75	-3.25	-1.25			4	-0.5	0.75	1.5	-0.5	1.25	0	0.75	-2.5	-1.75
	4.04	-0.5	-1.75	0.25	-2.25	0.25	-0.75	-2.25	-2.5	-1.25			4.04	1.5	-0.25	2	-1.5	2.5	-1.75	-0.25	-3	-2
	4.08	0.5	-1.75	0.75	-3.5	1	-2.5	-3	-1.25	-1.5			4.08	2	-1	1	-1.75	1	-3.25	-1	-2.25	-0.75
	4.12	1.25	0	-0.25	-3	1	-3	-2.5	0.25	-1.25			4.12	1.25	-1.25	-0.25	-1.5	-0.25	-1.5	-1	-0.25	-0.5
	4.16	0.75	1.75	-1.25	-3	1.5	-2.75	-0.75	-0.5	0			4.16	-0.5	0	-1	-1.75	0.75	0.5	0.5	-0.5	0.5
	4.2	-0.5	2.5	-1.75	-1.5	0.75	-1	0.25	-1.75	-0.25			4.2	-0.75	0.5	-1.25	-1.25	1	2	0.5	-1.5	0.5
	4.24	-0.75	2	-2	0	0.5	0.25	1.5	-0.75	-0.25			4.24	-0.75	0.25	-1	0	1.5	2.5	1	0	-0.75
	4.28	-0.25	1.75	-0.25	0.25	0.5	-0.25	1.25	0.25	-1.25			4.28	-0.25	0.5	0.25	1	0.75	0.75	-0.5	0.25	-0.75
	4.32	1	-0.5	0.75	0.5	1.5	-1.25	1.5	1.25	-1.5			4.32	1.25	-1.25	0.5	1.25	0.75	-0.75	-2	0	-0.5
	4.36	0.75	-1	2	0	0.75	-3.5	0.75	1.5	-1.25			4.36	1.5	-0.5	0	1.25	1.25	-2.25	-1.5	0.5	-0.25
	4.4	0.5	-1.25	2.25	1.75	-1.5	-4	-0.25	1	-1.5			4.4	0.25	0.5	0.25	1.5	0	-2	0.25	1.25	0.75
	4.44	0	-1.25	2.25	0	-1.5	-2	0	-0.75	-2.75			4.44	-1	0.25	1.75	1	0.25	-1.5	1.75	0	-0.5
	4.48	0	-1.5	1.75	-1.25	-1	-1.25	0	-2.5	-1.75			4.48	0	-2.25	3.25	-0.5	0.5	-1.5	1.5	-1	-1
	4.52	-0.25	-1	1.75	0.25	-1.25	-1.25	-0.5	-1.25	-0.5			4.52	1	-1.75	3.25	-0.5	-0.5	-0.25	1.25	0	-1.5
	4.56	-0.25	0.25	0.75	0.25	-1	-1.75	-0.5	0.25	-0.75			4.56	0.5	0.25	1.25	0	0	1	0.5	1	-1.5
	4.6	0.5	1.5	-1.75	-1.5	0	-2	-0.75	0.5	-1.25			4.6	0.25	0.75	-2	-0.25	0.5	0.75	-0.25	0.5	-1.25
	4.64	0.25	0	-3.5	-1.75	0.75	0.25	-1.5	-0.75	-1			4.64	1	0.75	-3.25	0	-0.25	1	-0.25	-1	-0.25
	4.68	-0.5	-1.25	-3	-0.75	0.5	2.25	-1	-0.75	-1			4.68	1	0.5	-3.5	0.5	0.5	2.75	0.75	-1.25	0.25
	4.72	-0.25	-1.25	-0.75	-1.25	0	1.25	0	-1.25	-1.25			4.72	0.5	0.25	-1.5	0.25	1	1.25	3.75	0.5	0.75
	4.76	-0.25	0	0	-1.5	-0.75	-0.75	0.5	-1.5	-1.25			4.76	-0.75	0.5	0.25	0.5	-0.25	-1	3	0.5	1.25
	4.8	0	0.75	-0.5	-1.25	-0.5	0.25	-0.25	-1.75	0.25			4.8	-0.5	0.75	0	0.5	-2	0.25	1.5	-0.25	2.25
	4.84	0.25	1	-2	-1	-0.75	0.25	-1.25	-1.25	0.5			4.84	-1	1.75	-2	-0.5	-3.25	0.5	0	-1	2
	4.88	0	0.75	-2	-1	-1.25	0	-3	-1.5	-0.25			4.88	-2.25	2.5	-2.75	-0.75	-3	-0.25	-1.75	-0.75	-0.25
	4.92	0.75	-0.5	-2.5	-0.5	-1.75	-0.5	-4.75	-0.75	-0.25			4.92	-1.75	0.75	-3	-1	-1.75	-1.25	-3.75	0	-1.5
	4.96	0.25	-2	0.25	0.25	-2	-0.75	-5	-0.25	-0.25			4.96	-1.25	-1.5	0	-1.75	-1.25	-0.5	-4	-0.25	0.5
	5	-1.25	-1.75	2	0.25	-1.5	-1.5	-1	0.25	0.5			5	-0.5	-0.75	1	-1.75	0	-1	-1.25	-0.25	2.25
	5.04	-1	-0.5	1.5	-1	-0.5	-2	1.75	0.25	0.25			5.04	-0.5	0.5	0.25	-1.5	2.5	-0.75	0.5	0.5	2.25
	5.08	-0.25	-0.75	1	-1.75	0.75	-0.75	2.5	-0.75	0.25			5.08	0	-0.75	-0.25	-1.25	3	0.25	2	0.25	0.5
	5.12	0.25	-0.5	-0.75	-1	0.75	-0.5	0	-1.5	0.25			5.12	0.25	-0.25	1	-2.25	0.75	0	0.75	1.5	-1
	5.16	0.25	-1	-1.25	-1.75	-0.5	-1.75	-0.75	-0.75	0			5.16	0.25	-1.75	1	-3.25	-2.25	-2	-0.5	1.75	0
	5.2	-0.25	-2	-2.25	-1.25	-1.5	-2.75	-1.25	1.5	-0.25			5.2	0.75	-3	-0.5	-1.5	-3	-2.5	-1.25	1.5	0.5
	5.24	-0.25	-1.75	-1.5	-0.75	-1.75	-4	-0.75	1.25	-0.5			5.24	0.25	-2	0	0	-2.25	-3.5	-0.75	0	1
	5.28	-0.5	-1	-0.25	0.25	-1	-2.75	-1	-0.5	-1.25			5.28	-0.25	-1	1	1	-0.5	-3	0.25	-0.25	0.25
	5.32	-0.5	-2.25	-2.25	0	0	-1.75	-1.5	0	-1.75			5.32	-0.25	-2	0	0.75	0.5	-1.5	0	1.5	-1.25
	5.36	-1.25	-2.75	-3.75	0.5	0.75	-2	-2.25	1.25	-1.75			5.36	-1.25	-1.75	-1	1.5	1	-1	-0.75	2.25	-2.25
	5.4	-2.25	-2	-0.75	-0.5	0.5	-2.5	-2	0	-0.75			5.4	-0.5	1.75	-0.5	1	1	-1.25	-0.75	1	-0.5
	5.44	-1.75	-2.75	1.75	-1	0.25	-0.75	-2.75	-2.5	0			5.44	0	2.25	-1	0.25	2	-0.25	-1.75	-1.25	-0.75
	5.48	-0.75	-3.75	2	-0.5	-2.25	1	-3.25	-3.25	-1			5.48	-0.25	0.25	1	0.25	0.25	0.75	-2.25	-2.25	-1.25
	5.52	0.5	-3.25	0.75	-0.75	-3	1	-3.5	-1.25	-0.5			5.52	1	-1.5	2.25	0	-1.5	2	-1.25	0	0.5
	5.56	1	-2.25	-0.25	-1	-1.75	1	-3.5	0	0			5.56	1.75	-3	2.25	0	-1.5	2	-0.5	1.75	1.25
	5.6	0.5	-1	-0.75	-1.75	-1.25	0.75	-3.25	0.25	-0.75			5.6	2.5	-3	0.75	-1.25	-1.25	0.75	-1.25	1.75	0
	5.64	0.25	0.75	-0.25	-0.75	-2	0.5	-2.5	0.5	-0.5			5.64	2	-1	0	-1	0.5	0.25	-2.5	0.25	-0.5
	5.68	0	1.5	-0.25	-0.5	-1	0.75	-0.25	0.25	-1.25			5.68	0.5	0	0	-1	2	-0.5	-0.75	-0.25	0.75
	5.72	-0.25	1	-1.75	0	-0.75	0.75	0.5	-0.5	-1.25			5.72	-1	1	-1.25	-0.75	1.75	-0.25	1.5	-0.25	1.25
	5.76	0.25	0.5	-1.5	-0.25	-1.25	0.75	0	0	-1.25			5.76	-1	0.75	-1.25	-0.75	0.75	-0.25	2.5	0.5	0.75
	5.8	1.25	0.25	0.25	0	-0.75	-0.5	-0.75	1.5	-1.25			5.8	-0.5	0	0.5	-0.75	-0.5	-1.25	1.75	0.75	0.25
	5.84	2.25	-0.25	1.25	-0.25	-0.5	-2.25	0.25	0.75	-0.75			5.84	1	-0.75	0.75	1.25	-1.5	-1	2.25	0.75	-0.25
	5.88	1.75	0.25	0.75	-0.5	0.5	-1.75	1	-1.25	0.25			5.88	1	0	0.5	2.5	0	0	2.75	-0.75	-0.75
	5.92	-0.5	0	-1	-1	1.5	-0.25	-0.75	-2	-0.25			5.92	-0.75	-0.25	1	1.75	0.75	0.75	2	-2.25	-0.75
	5.96	-2.5	-0.75	-1.75	-1.5	0.75	0.25	-3	0	-0.5			5.96	-2	-1	0.75	-0.5	0.75	0	-0.25	-1	-0.75
	6	-1.75	0.25	-0.75	-2.5	1	-1.75	-2.25	1.75	-0.5			6	-0.25	-0.25	-0.25	-3	0.5	-0.5	-2	0.5	-1.75
	6.04	-1	0.5	0	-2	0.25	-3	1	1.25	-0.75			6.04	0.5	-0.25	-0.75	-1.75	0	-0.75	-0.25	0.75	-3.25
	6.08	-0.25	-1	-0.25	-1	0.25	-2.25	2	0	-1.5			6.08	1	-0.25	-0.25	0.75	0	-0.75	1	-0.5	-3.75
	6.12	-0.25	-2.25	1	-0.5	-0.75	-2.5	1.5	-0.5	-1.25			6.12	1	-1	1.75	1.5	-0.25	-0.25	1.5	-0.25	-2.25
	6.16	-2.5	-1.25	1	-0.5	-1.25	-2	1.25	-2	0			6.16	1.5	-1.25	0.5	-0.5	1	0.25	2.25	-0.5	-0.5
	6.2	-3.25	0	-0.5	-0.75	-0.75	-0.5	-0.75	-1.75	-0.25			6.2	0	0.25	-1	-2.25	1	0.25	0.75	-0.75	-0.5
	6.24	-2.5	0	-1.5	-1.25	-0.75	0.75	-4.25	-1	-1			6.24	-1.75	1.5	-1.5	-1.25	1	0.75	-1.75	-1	0.25
	6.28	-2.25	-0.25	-1.5	-1.75	-0.25	1	-4.5	0	-0.75			6.28	-3.25	0.75	-1.25	-0.25	0.25	1	-2.5	-0.75	0.75
	6.32	-0.25	-0.25	-1.75	-2.5	-1.25	1.25	-2.5	-0.75	-0.25			6.32	-2	-0.5	-1.25	0.5	-1	1.5	-1.75	-0.25	0.5
	6.36	1.75	0.25	-3	-2	-1.25	0.75	-0.25	-1.25	0.5			6.36	-1	0.5	-1	1	-1.25	0.75	-0.25	1	0.75
	6.4	0.75	0.75	-3.75	-0.25	0.5	-0.25	-0.75	-2.25	-0.25			6.4	-0.5	2.25	-0.75	2.75	0.25	0.25	0	0	1.5
	6.44	0	-0.75	-3	-1	0.75	-0.75	-1.25	-1	-0.75			6.44	0.25	1.25	-1.5	2	0.75	-0.25	1.25	-0.25	1.5
	6.48	1	-2.25	-0.5	-2.25	-0.25	0	-0.25	0.75	0.25			6.48	1.25	-0.25	-1.5	-0.25	0.25	-1	1.5	1.25	1.75
	6.52	1.5	-2.75	0.25	-2.5	-1.75	-1	-1.5	0.5	1.75			6.52	1.5	0.75	-0.5	-0.25	-0.5	-1	-0.5	1.75	2.75
	6.56	1	-1.75	-1.75	-2.25	-1.75	-1.75	-1.25	-1.25	1			6.56	1.5	1.5	0	-0.5	-0.5	-1.25	-0.25	0.25	2
	6.6	1.25	1.25	-1.75	-0.75	1.25	-1.75	-0.75	0.75	0.75			6.6	3.25	1.5	1.25	-1.25	-0.25	-1.25	0	0.5	0.5
	6.64	0.5	2	0	0.25	0.75	-0.5	-0.5	3	-1			6.64	2.75	-0.5	1.5	-1.75	-0.75	0.25	-0.5	2	-2
	6.68	0	0	1.75	0.5	0.5	0.25	0.75	1.25	-1.25			6.68	1	-2	2	-1.5	0.75	0.25	0.25	-0.25	-2
	6.72	-1.5	-0.5	2.5	1	-0.75	0	-0.75	-0.5	-1			6.72	-1.75	-1.5	1	1.25	1.75	0.75	0	-1.75	-0.75
	6.76	-2.5	-0.5	1	1.5	-0.75	-0.5	-2.5	-1.25	1			6.76	-4	-0.25	0	3.25	2.75	2	-0.75	-1.5	1.25
	6.8	-0.75	0	-0.25	0.5	-2	-0.75	-2.75	-0.75	1.75			6.8	-1	1	-1	0.75	1.5	2.5	-0.5	0.5	0.75
	6.84	0.5	-1.25	-2	-1.25	-2.5	-1.25	-1.75	-0.75	1.25			6.84	1	1.5	-1.5	-1	-0.25	2	0.25	0.5	-0.5
	6.88	2	-2.5	-3.75	-0.75	-2.25	-1.5	0.25	0.5	-0.5			6.88	0.5	1	-2	-0.25	-1.5	0.5	-0.25	0	-0.75
	6.92	1.25	-1	-3.75	-1.5	-0.5	-1.25	-0.25	0.5	-1			6.92	0	0.25	-1.5	-1.25	-1	-1	0	-1.5	0.25
	6.96	0.25	0.25	-2.75	-3	0.5	-1.5	-0.5	1	0			6.96	0.5	0.25	-1	-1.5	0	-2	0.25	-1	1
	7	0.5	0.5	-1.5	-2.75	0.25	-1.25	0.25	1.75	0			7	1.25	1.25	-1	0.25	-0.5	-2.25	0.5	0.5	0.25
	7.04	-0.25	0.75	0.25	-2.25	0.75	0	0.75	1.75	-0.75			7.04	0.75	1.25	-0.75	1.5	-0.25	-1.25	1.75	2.25	-1
	7.08	-1.25	-0.75	0.75	-0.5	0.25	1.5	-0.25	0.25	-2			7.08	0.25	-0.5	0.25	1.25	-1.25	1	1.5	1.25	-1.75
	7.12	-2	-1.75	0.25	1	-1.5	1	-0.75	-1.5	-1.5			7.12	-0.5	-0.75	0.25	0.25	-1.5	1	0.75	-1.25	-1.5
	7.16	-1.75	-1	-0.5	1	-2.75	0.5	-1.75	-1.5	-1.25			7.16	-0.25	0.25	0.25	-0.5	-1.25	0.25	0.5	-1	-1.5
	7.2	-0.5	-0.5	0.5	0.75	-2	0.5	-3.25	-0.25	0			7.2	0.5	-0.25	0.75	-0.5	0.5	1.25	-0.75	0.5	-1.5
	7.24	1.25	0.75	1	-0.25	0	0.75	-2.5	0.75	1			7.24	0.5	0.25	1	-0.25	2	2	-2.75	0.75	0
	7.28	1.25	3.25	1	-1.5	0	1.25	-1.25	-0.75	1.75			7.28	1.25	1.5	1.5	-0.75	1.25	2	-3.5	-0.5	2.5
	7.32	-0.25	1.5	1.5	-0.75	-1.5	1.25	0.25	-1.5	0			7.32	1.25	0.5	1.5	-0.75	-0.75	0.25	-1.25	0.5	1.75
	7.36	-0.25	-1.5	0.75	0	-2	0.5	0.75	-0.75	-0.25			7.36	2.25	-0.5	0.75	0.25	-1.25	-0.75	0.5	1.75	1.25
	7.4	-0.25	-2.5	-0.5	-0.25	-0.25	-0.75	-1.25	0	0.25			7.4	1.75	-0.25	-1	0.75	0.5	-0.5	1.5	1.25	1.75
	7.44	-1	-1.25	-0.75	-0.25	1.25	-0.5	-2	0.75	-0.5			7.44	1	1.25	-0.5	2	2.25	-0.5	1.25	1.75	0
	7.48	-1	-0.25	-1	0.75	0.75	0.25	-2	0.25	-0.25			7.48	0	1.75	1	3.75	1.25	0.5	-0.5	1.25	-1
	7.52	1	-0.5	0.5	1.25	1	-0.25	-1.25	0	0.25			7.52	0	1.25	1.25	2	0.5	-1	0.25	0	-0.5
	7.56	2	-1	1	0.25	0.75	-1.5	-0.25	0.5	0.5			7.56	-0.5	0	-0.25	0.5	-0.25	-2.25	0.75	0.25	-0.5
	7.6	0.75	0	0.25	0	1.75	-1.25	0.5	-0.25	-0.75			7.6	-1	-0.5	-0.5	0	-1.25	-1.5	0.25	-0.5	-1.75
	7.64	-1.5	1.5	0.25	-0.25	3	-2.25	1.25	-1.75	-2.25			7.64	-2	-0.5	0.5	0.5	-0.25	-2.25	0.75	-1.75	-3
	7.68	-1.5	2.25	1.5	-1.25	2	-2.25	1.5	-1.75	-1.75			7.68	-0.25	0.5	2.5	0.25	0.25	-1.5	1.75	-2	-1.25
	7.72	-0.5	2.25	1.75	-2.5	0	-3	0	-1.25	-0.25			7.72	2.5	0.75	3	-0.25	-1	-1.75	0.25	-1.25	0.5
	7.76	0.25	1.5	1	-3.5	-1.25	-3	-0.75	-1.5	1.25			7.76	2.5	0.75	1.5	-1.75	-1	-1.25	-1	-1.5	0.75
	7.8	-1	-0.25	-0.75	-2.5	-1	-2.25	0	-2	3			7.8	0.25	0	-0.25	-2.75	-0.75	0.25	-0.5	-1.75	1.5
	7.84	-1.5	-2.25	-2.25	-1.25	0.5	-0.25	0.5	-0.75	1.5			7.84	-1	0.25	0.25	-3	-0.25	0.75	0.25	0.25	1
	7.88	-1	-3.75	-1.75	-1.75	2	0	-1	-0.75	0.5			7.88	0.25	-0.75	0	-2.5	0.5	0.25	0.25	1.75	-0.75
	7.92	-0.25	-2.5	-1.75	-1.75	0	1	-0.75	0	-0.25			7.92	1.5	-0.5	-0.25	-1.5	0	-0.25	0	1	-0.25
	7.96	-0.25	-0.5	-1.5	-2	-0.5	1.25	0	1.75	-0.25			7.96	0.75	0.25	-0.5	-1	-0.25	-0.75	0.25	0.75	1
	8	-0.5	0.25	0	-1	-0.25	-0.25	0	1.75	-0.25			8	-0.75	0.5	0.25	0.25	1	-1.25	0.5	0.25	1.5
	8.04	1.5	0.75	-1	0.5	0	-0.75	-0.75	1.5	-0.25			8.04	1.25	-0.5	0.25	2	1	-1	0.25	0.25	0.5
	8.08	2	-1	-0.5	-1	0.25	-1.25	-0.25	1.25	-0.5			8.08	1	-1.5	0.75	1	0.25	-0.5	0	0.75	0
	8.12	1.5	-2.5	0	-1.25	0.5	-0.5	1	0.5	-0.5			8.12	0	-2.5	1	-0.5	0.25	0.5	-0.5	0	1
	8.16	1	-2.75	0.75	0	-1	-0.75	0.25	0	-1			8.16	0	-3.25	1.25	-1	1.5	0	-1.25	-0.25	1.5
	8.2	-0.25	-1	-0.5	1.5	-2	-0.5	-1	-1.25	-1.5			8.2	0.25	-2	-1.25	-1	2	-0.75	-0.5	-0.75	0
	8.24	0.25	-1.5	-1.5	2.75	-0.75	-1	-1.5	-1	0.5			8.24	0.75	-0.25	-2.25	1.25	2	-0.75	-0.5	-0.5	0
	8.28	1.25	-0.75	-0.5	1.75	1.25	-0.5	-0.5	0.25	1			8.28	0.5	1	-0.5	3.25	1.75	0	0.25	1	1
	8.32	-0.25	1.25	-0.5	-0.5	1.5	0	-1	1.25	-1			8.32	0.25	3	-0.25	2.5	0.25	1.25	0.75	2	0.75
	8.36	-0.75	1.5	0	-1	0.75	-0.5	-0.75	2.25	-2.5			8.36	0.5	3.25	-1	0.5	-1.5	0.5	3	1.75	-0.5
	8.4	0.25	2	1.75	-0.75	-0.75	-0.25	0.5	1.75	-0.5			8.4	-0.5	2	-0.5	-0.75	-2.25	-1	2.25	1.25	0
	8.44	0.25	1.75	3	-0.75	-2.25	0	0.25	0	2.25			8.44	-1	-0.5	0.75	-0.25	-3	-0.5	0.75	-0.5	0.25
	8.48	0.25	0	1.75	-0.75	-1.75	1	-1	0	2.25			8.48	0.5	-2.25	0.5	-0.25	-1	0.5	0.75	-1.25	-0.5
	8.52	-0.25	-1.25	-0.25	-0.75	-1.25	1.75	-1.75	-0.5	0.5			8.52	1.5	-2.5	-0.25	0.25	-0.5	2	0	-0.75	0.25
	8.56	-1	-1.75	0	-2	-0.25	1.75	0.75	-0.75	-0.5			8.56	0.25	-2.5	-0.25	-0.5	-0.75	2.75	0.75	0	0.5
	8.6	-0.25	-0.5	0.25	-0.5	1	0	1	-0.5	0			8.6	-0.75	-1.25	1.25	-0.75	0.25	2	1.75	0.5	1
	8.64	0.75	1.25	-2.25	1.25	0.5	-0.25	-0.75	-1	0			8.64	0	1	0.25	-0.25	0.25	1.25	1.75	-0.5	0.75
	8.68	1.75	2	-1.5	-0.25	-0.25	-0.25	-2.25	-2	0			8.68	1	2.75	-0.25	-0.75	0.25	0	0.25	-1.25	0.5
	8.72	1.25	1	0.5	-1.25	-1.5	-1.75	-2.25	-1.25	-2			8.72	1.5	3	1.5	-0.25	-0.5	-1.5	-2	0.5	-0.25
	8.76	-0.75	0.75	2	0	-2	-2.75	-1.5	1	-2.5			8.76	1.25	2.5	1.5	1	-1.5	-1.25	-2.5	1.5	-1
	8.8	-1.75	1.25	1.75	-0.5	-1	-2.5	0	0.25	-1.5			8.8	1.5	2.25	0.75	1	0	0	-2	-0.25	-1.25
	8.84	-0.5	0.75	0	-1.25	2.5	-0.75	0.75	-0.25	-1.25			8.84	1.5	1	0.5	0	2.25	0.25	-1	0.25	-1.5
	8.88	0.75	0.25	0.25	-0.75	3.5	0	1.5	-1.5	-0.5			8.88	2.75	1	0.25	1	2.25	0.25	0	1.25	-1.5
	8.92	2	-0.5	-0.5	-0.5	1.75	0	0.5	-1.25	0			8.92	3	0.75	-1.25	1.25	0.5	-1	1.5	0.25	-1.5
	8.96	1.25	-1.5	-0.5	0.25	-0.5	-1	-1.5	-0.5	0			8.96	1	0.5	-0.25	1	-1	-2.25	0.25	-0.5	-1
	9	-0.75	-0.75	-0.25	1.25	-1	-2.75	-0.5	0.25	0.25			9	-1.75	1.25	1	1.75	-2	-1.25	0.25	0.25	0.25
	9.04	-1	-0.25	-0.75	0.5	-0.5	-2.5	0.5	2	-0.75			9.04	-2.5	0.75	1	1.25	-1	0.5	1.25	0.75	1
	9.08	0.75	0	-1.25	-1.25	-0.5	-0.75	0.25	2.75	-2.25			9.08	-0.25	0.25	1	-2	-0.25	1	1	0.25	-0.5
	9.12	2.5	0	-1	-2.5	-1.25	-0.5	1.25	2.25	-2.5			9.12	1.75	0.5	0.5	-2.5	-0.5	-0.5	0.75	-0.25	-1.75
	9.16	1.75	0.25	-2	-2.25	-1.75	-0.25	0.5	0.5	-0.5			9.16	2.5	0.25	0	-2.5	-0.25	-0.5	-0.25	-1	-1
	9.2	0.75	-0.25	-2.25	-0.5	-1.5	0.5	-1	-1.5	0.75			9.2	1.5	-0.75	-1	-1.75	-1	0.5	-0.5	-1.5	-0.25
	9.24	-1.25	-0.25	-0.75	0.75	-0.25	1	-1.5	-1.5	1.25			9.24	-0.25	-0.5	-2.5	-1.75	0.75	0.5	-0.75	0	0.5
	9.28	-1.25	-0.5	0.5	0	-0.25	1	-2.25	-1.75	1.25			9.28	-1	-0.75	-1	-1.5	1.25	0	-0.25	0	1.25
	9.32	0	-0.75	0.5	-1.25	0.25	-0.75	-2	-2.5	1			9.32	-1.25	-1.5	1.5	-0.75	-0.25	-1	-0.5	0	1.25
	9.36	1.5	-1.5	0.75	-1.75	0.75	-1.25	0.75	-1.75	1.75			9.36	-1	-1.75	2.25	-0.25	-0.5	-0.25	0.75	-1	0.25
	9.4	0.5	-1.5	1.25	-0.25	0.5	-1	1.75	-2.25	2.25			9.4	-0.25	-1.25	0.75	1	-0.5	0	2	-2.5	-1
	9.44	0	-1	1	0	0.25	0	0.5	-3	1.5			9.44	-0.5	-0.75	-0.75	1	-0.5	0.5	0.5	-2	-2.25
	9.48	1.5	0	0.75	0	-1.25	-0.5	-0.5	-0.5	2.25			9.48	0.25	0	1	1	0	0	-0.5	0.25	-0.75
	9.52	1.5	1.5	0.5	-0.5	-1.25	1	0	2.25	1.5			9.52	1	2.25	1	0.75	-0.25	-0.25	0.75	2.5	0
	9.56	0.5	1.5	0	-0.75	-1.25	2	-0.25	2.25	-1			9.56	0.75	2.25	-1	0.5	0.5	0.5	0.75	3	-0.75
	9.6	0.5	-0.25	-0.5	-0.75	-1	1.25	-1.25	0.75	-1			9.6	-0.25	1.25	0	-1.25	1.25	1	-0.5	1	-1.75
	9.64	-0.25	-1.75	-0.5	-0.25	-2.75	-0.5	-2.25	-0.5	0			9.64	-0.75	0.5	1.5	-1	-1	0.5	-1.5	-1.75	-0.25
	9.68	-1.25	-0.5	0	0.25	-3	-1.5	-2	-1.25	1.25			9.68	-0.5	1	3	0.25	-1.5	-0.25	-0.5	-3	0.5
	9.72	-0.75	-0.25	0	0.75	0	-1.5	-1	-1.5	0.5			9.72	0.5	0	2.25	1.75	0	-0.75	1.5	-1.75	-0.75
	9.76	-0.75	0.5	-0.5	-0.25	1.75	-0.5	-2	0	0			9.76	-0.5	-0.25	0.5	1	1.5	-1.25	2	0	-1
	9.8	-0.75	1	-0.75	-0.5	0.5	0.5	-0.5	2.25	1			9.8	-1	1.25	-0.5	0.25	0.5	-1	2.25	0.25	-0.25
	9.84	-0.25	1.5	-0.25	-0.75	0	0.5	1.25	2	1.75			9.84	0.75	2.5	-1	-1.25	-0.75	-0.25	2.5	-1.5	0.25
	9.88	0.5	1.5	-0.75	-1.75	0	0.25	1.75	0.25	0.25			9.88	2.75	3	-1.5	-1.25	-0.75	-0.75	1	-2	-0.25
	9.92	0.75	1	-0.5	1.75	-0.5	1	1.75	-1	-1			9.92	2.5	1	-1.25	1.75	-1.5	0.25	-1.75	-0.75	-0.25
	9.96	0.5	0.5	0.5	2.75	0.5	1.75	0.75	-0.5	-1.75			9.96	1.25	-0.5	-0.75	2	-1.25	1.5	-3	0.25	1
	10	-0.5	0	1.5	0.5	0	1	1	1	-3			10	-0.5	0	1	0.75	0.25	0	-2	0.25	0.25
	10.04	0.5	-1.5	1.25	0.75	0	-1.25	1	0.75	-2.5			10.04	-1.25	-0.5	1	1	1.5	-2.25	0.5	0.25	-2
	10.08	2.5	-2	0	0.75	-0.75	-2.5	0.25	-0.5	0			10.08	0	-0.75	-1	1.5	0	-3	1	0.25	-0.75
	10.12	2.5	-1.25	0	0.75	0	-1.75	-0.75	-0.25	0.75			10.12	1.25	-1.25	-1.5	0.75	0.5	-2.25	1	0.75	0
	10.16	1	-0.5	0	0.5	1.25	-1.5	-0.25	1	-0.5			10.16	1	-1.75	-0.25	0	1.25	-0.5	1.25	1	0.25
	10.2	-1.5	-2	0	-0.5	1.5	-1.75	-1	1.5	-0.25			10.2	-1.25	-3	0.25	-0.25	0.5	0.25	0	1.25	0.75
	10.24	-2.5	-2.5	-0.5	0.5	1.25	-0.5	-2.25	2	-1.25			10.24	-2.75	-3.25	0.25	0.5	-0.5	0.75	-1.5	2.75	0.25
	10.28	-0.5	-1.25	-1.25	2.25	-0.25	0.25	-2	1.25	-1			10.28	-2	-1.75	0.75	0.5	-1.5	0.75	-1.5	2.5	1.5
	10.32	0.25	-1.25	0.25	3	-0.75	0.75	-2.25	1.25	-1			10.32	-1.25	0	1.5	1.5	-0.5	0.75	-2.5	1.75	1.25
	10.36	0.25	-1	1.25	1.5	-0.25	0.5	-1	0	0			10.36	-1	-0.25	1.25	0.5	-0.5	0.25	-2.25	1	-0.25
	10.4	1.25	-0.25	0.25	-0.5	-0.5	0.5	-0.25	-1	1.25			10.4	0	0.25	0	-1	0	-0.25	-1.75	0	-2.25
	10.44	1	-0.25	-0.75	-0.75	-0.5	-0.5	-1	0.5	1.25			10.44	-0.25	1.75	-1	-0.25	0.25	0.5	-1.75	-0.25	-2.25
	10.48	0.75	0	0	0	-0.75	-1.25	-0.25	0.25	0.75			10.48	0.25	2.75	-2	2.25	0.75	-0.5	-1.25	-0.5	1
	10.52	1	0.75	0.25	1	0.25	-2	0.75	-1.75	0			10.52	0	2.25	-0.5	2.25	1.75	-2.75	-0.25	-2.25	3.25
	10.56	0.75	0.5	0.25	1	0.5	-1.75	1	-2.25	-0.5			10.56	0.25	0	0.25	0.25	2	-2.5	0.25	-2	0.75
	10.6	1.25	0.5	-1	-1.75	-0.25	-0.25	0.25	-1.75	-0.75			10.6	2	-0.25	-0.25	-3.25	0	0.25	0.75	-2	-1.5
	10.64	1.75	0.5	-1.75	-1.75	-0.5	0.25	-0.25	-0.75	-1.25			10.64	2	0.25	-0.5	-1	-1.5	1.75	0.25	-1.5	-2.25
	10.68	0.75	0.5	-1.75	0.5	0.25	0.5	-0.25	0.25	-1.5			10.68	1.25	-0.75	-1.25	1.5	-0.75	1.25	0.25	-0.25	-2.25
	10.72	-1.5	0	-1.25	2.25	0.25	0.75	-0.75	1	-1			10.72	0	-1.75	-1.5	1.5	-0.25	1	0	0.5	-0.75
	10.76	-1.5	0.5	0.5	1.25	-0.25	-1.75	-0.5	0	0			10.76	-0.25	-0.25	-1.5	-1.25	-0.75	-1.25	-0.25	0.25	0
	10.8	-0.5	2	0.75	-0.5	-1	-2.75	1	-1.25	0			10.8	-0.25	2.5	-1	-3	-2	-2	1.75	0.5	-0.75
	10.84	-0.75	0.75	1	-3.25	-1.25	-1.25	1.25	-1.5	-0.5			10.84	-1	1.75	1	-4.5	-2.25	-1.75	2.25	0.75	-1
	10.88	-1.25	-1	1.5	-3.75	-0.75	-0.5	0.25	-0.5	0.25			10.88	-2	0.5	2	-3.25	-1.5	-1.5	1.25	0.75	-1
	10.92	0	-1.5	1.75	-2	-0.75	-0.25	0.25	0.75	0.75			10.92	0.25	0.75	1.5	-1.5	-0.5	-1.25	0.25	0.5	-0.5
	10.96	1.5	-1	1	-1.5	0.75	-1.25	0.25	1.75	0			10.96	3.25	0.75	1	-0.25	0.25	-1	0.75	0.75	-1.25
	11	1.75	-0.5	-0.25	-1	1.5	-0.75	-0.75	1.75	0			11	3	-1.75	0.25	0.75	2	0.25	2.75	2	-0.25
	11.04	0.75	0.75	-1.75	1	0.75	-0.25	-0.75	1.5	-0.25			11.04	1.25	-2	-1.25	2	2	0	1.5	2	0
	11.08	0	0	-1.5	2.25	0.5	0	-1.25	0.25	1			11.08	-0.5	-0.5	-1.25	1.5	1.5	0	-1.75	0.25	0.75
	11.12	-0.75	-0.5	0.5	1	0.5	-0.75	-1.25	-0.25	1			11.12	0	0.75	0.75	1.25	0.75	0.5	-2.75	-1.25	1
	11.16	-0.25	0.25	2	-0.5	1	-0.5	-0.25	0.25	0.5			11.16	1.25	0.75	1.75	0.5	0.75	0	-0.5	-1.25	0.25
	11.2	1.5	-0.25	2	-0.5	1	0.75	0.75	0.25	1.5			11.2	2.5	0.25	1.75	1.25	0.25	0	0.25	-1	0.5
	11.24	1.75	-1	1.5	-0.5	0.25	1.75	0	0.25	1.75			11.24	1.75	1.5	1	1	-0.75	0.25	0	-0.25	0.5
	11.28	2.25	-1.25	1	-0.25	0.75	1	-0.25	-0.25	-0.75			11.28	-0.5	1.5	-0.25	0	0.25	-0.25	0.25	0	-0.5
	11.32	3	-0.5	-1.75	-2	1	0.25	-1.25	0.5	-2.75			11.32	-2	0	-1.25	-1.75	1.25	-0.75	0	0	-0.25
	11.36	2	0.75	-1.75	-3.5	1	1.25	-2	1	-2.5			11.36	-0.75	-0.5	-1.25	-3	0.5	0.5	-1	-0.25	-0.5
	11.4	0.5	-0.25	0.25	-3.25	-0.25	1.25	-1.5	0.75	-1			11.4	1	-1.5	0.75	-1.75	-0.25	1	-1.5	-1.25	-0.75
	11.44	-1.25	0	1.25	-1.75	-1.75	0.25	-0.75	0	-0.5			11.44	1	-0.5	0.75	-0.75	-0.75	1	-1.75	0	-0.5
	11.48	-1.75	1.25	1	0.5	0.75	-1	-0.5	-0.75	-1			11.48	0.75	0.25	0.25	0	0	-0.5	-1.25	1	0.25
	11.52	-1.25	1.5	0.75	1.75	3.25	-2.25	-0.75	-1.25	-1.5			11.52	0.75	0.5	0	-0.5	0.75	-1.75	-0.75	0.5	-0.5
	11.56	0.75	1	0.75	1.25	1.5	-1.25	-0.75	0	-0.25			11.56	0.75	0.5	0.25	-1.25	-0.5	-1	-0.5	1.25	-1.5
	11.6	1.5	1	-0.25	0.75	1	-0.75	-0.5	0.75	1.25			11.6	0	0.75	0.25	-1.25	0	-0.5	0	0.75	-0.75
	11.64	0.75	0	-1.25	0	1	-0.5	1	0.5	1.25			11.64	1.25	-0.25	0.5	-1	0	-1.25	1	1	-0.5
	11.68	1.25	-0.5	0	-0.5	0.25	-1.75	-0.25	-0.5	1			11.68	2.25	-0.75	2	-1	-0.5	-1.75	0.5	0.25	-1
	11.72	1	-1.25	1.25	-1.5	0	-1.5	-1.75	-1.75	-0.25			11.72	1	-1	2.25	0.25	0	0.25	-0.75	-0.5	-1.75
	11.76	-0.5	0	0.75	-2.25	-1	-0.5	-0.5	-1.75	-1			11.76	0.25	-0.5	0.75	1	-0.75	1	0.75	-1.75	-0.75
	11.8	-0.25	0.5	0.5	-1.75	-2	-1	-0.5	-0.75	0.25			11.8	1.25	0.75	0	0.25	0	1	0.5	-1.5	0
	11.84	0.75	1.25	0.5	-1.25	-1.5	-1	-0.75	-0.25	1.75			11.84	1.5	1.25	-0.75	-1	0.75	1.25	0.25	-0.25	0
	11.88	1.25	0.5	3.5	-1.75	-0.25	0	0.75	2.75	1.25			11.88	0.25	0.5	0.25	-1.25	0.5	1.75	1.5	1.5	0.5
	11.92	0	-1.75	2.75	-2.75	1	0	1.5	3.5	-0.25			11.92	-1	0.25	-0.75	-0.75	1	1.25	2	1.75	0
	11.96	-1.25	-2	-0.25	-1.75	1	-1.25	1	3.25	0			11.96	-2	0	-1.75	0.5	0.25	-0.25	1	0.25	1.75
	12	-0.5	-0.75	-0.75	0.25	1	-0.25	1.5	0.5	-0.25			12	-2	-0.25	-0.75	1	0	-0.5	0.5	-2.25	1.75
	12.04	0.5	-1	0.75	0.75	0.75	0.75	1	-1.25	-0.75			12.04	-0.75	-2.25	0.75	1.25	1	-1.25	0	-2	0
	12.08	2	0	1	1.25	1.25	1.5	0.25	-0.5	-0.25			12.08	1.25	-2.75	0.25	1.75	1	-1.75	-0.5	-0.75	-0.75
	12.12	2.75	0.25	-0.75	2.75	2	0.75	1	0	1			12.12	1.75	-1	-0.75	1.25	1.5	-2	-0.75	-0.75	-0.5
	12.16	2.25	0	-1.5	3	0.25	0.25	1.75	-1.5	0.25			12.16	1.75	-0.5	0	0	0.25	-0.25	-1.25	-2.75	-1
	12.2	-0.25	0.25	-1	0.25	-2	1.25	1.25	-2	1.25			12.2	-0.25	0.25	0.75	-1	-1.5	1.75	-1.5	-2.25	0.25
	12.24	-2	-1.25	0	-1.5	-3	1.25	0.25	-1.5	1.25			12.24	-2	0.5	1.5	-0.75	-2	3	-0.5	-0.75	0
	12.28	1.25	-1.25	0.25	-1.25	-0.25	0.25	0.25	0.75	1			12.28	1.5	1.5	1.75	-1.25	-1	2.25	2	0	-0.5
	12.32	5	-1.5	-0.25	0	1.25	0.75	-0.25	0.75	1.25			12.32	4.75	2.75	1.25	-0.75	0	1.25	1.5	0	0.75
	12.36	5.75	0	-1	1.75	0	0.25	-0.25	0.75	1.5			12.36	4.5	2.5	-0.75	0	0.5	0	0	2	1
	12.4	2	1.75	-2.5	2	0.5	-0.5	0	1.25	1			12.4	2.25	1.25	-3.25	1.25	1.5	0.5	0.25	2.25	0.5
	12.44	0.5	3.5	-1.5	0.25	0.5	1.5	-0.25	0.5	-0.25			12.44	1	1	-3.5	1.25	1.5	2	1	0.75	-0.75
	12.48	0.5	4.25	0.75	-1.25	0.5	2.25	-0.5	-0.5	0			12.48	0.5	0	-0.75	0.75	1	1.75	0.5	-0.75	-2
	12.52	0.25	1.75	0	-2.5	0.5	2	-0.75	0	0.5			12.52	-0.5	-1.25	0	0.5	0.25	1.25	-1	-1.25	-0.25
	12.56	1	-1.75	0.25	-1.25	0	2.25	-0.5	0	0.75			12.56	-0.75	-2	-0.25	1	0	0.25	-0.25	-1.5	1.25
	12.6	1.25	-2.75	0.75	0.5	1	1.75	0	-0.5	0			12.6	-1.75	-2	0	1.5	0.5	-0.5	0.25	-1.25	-0.25
	12.64	-0.5	-0.75	1	0	0.75	0.25	0.25	0	-0.5			12.64	-3.25	-1.5	0.25	0.5	0.5	-1.75	0.5	0	-0.75
	12.68	-1.25	1	1	-0.75	-1	0	0.5	0.75	-0.75			12.68	-2.5	0.25	0.5	-0.5	0.5	-2.25	0.5	0.5	-1
	12.72	-1.5	2.25	1	-2.5	-0.25	-1.75	-0.25	1.5	0			12.72	-1	1	0.5	-0.75	0.75	-1.75	-0.75	1.25	0
	12.76	-2	2.25	0.25	-2.25	0	-2.5	0.5	2.25	0.5			12.76	-1	1.75	0.75	-1	0.5	-1.75	-0.25	2	0.75
	12.8	-0.75	1	0	0.75	-1	-2.75	0.25	0.25	1			12.8	-0.25	1.5	0.5	-0.5	-1	-3.25	-1.75	2	2
	12.84	0	-1.25	0.75	2	-0.25	-2.25	-1	0.25	1.5			12.84	0	0	0.5	0.25	-2.75	-3	-2.75	2	1.25
	12.88	-0.25	-1.5	2.25	-0.5	1.75	-1	-0.75	0.5	1.75			12.88	-0.75	-0.5	1.25	-1	-1.25	-1.5	-0.75	0.25	0.5
	12.92	1	-2.75	3	-1	3.25	0.25	0	0.25	1.75			12.92	0	-1.75	1.25	-1	2	0.5	0.75	-1.25	0.75
	12.96	0	-2.75	4	-1	1	1.5	0.75	1.75	0.5			12.96	0	-2	1	-1.5	0.5	1	0.5	-0.75	-0.5
	13	0.5	-0.25	3.25	0.25	-0.5	1.25	2.5	2.25	-0.25			13	1	-0.5	1	-0.75	-2	0	2	0	-2
	13.04	1.5	1.25	1.25	0.5	-1.75	0.75	1.5	1	0			13.04	0.75	1	0.75	0	-2.75	-0.75	1.5	-0.25	-0.75
	13.08	1.75	2	-0.25	0.75	-1	0.5	0.5	0.75	0.75			13.08	0.5	2.25	0.75	0.25	-1	-1	-0.25	1.25	0
	13.12	1.25	1.75	0.5	0.25	-1.25	0.5	-0.25	1.75	0.25			13.12	0.25	1.25	1.25	0.25	-0.5	0.5	-1.25	2	0
	13.16	0.75	1.5	1.5	1	0	0	-1	1.5	-0.75			13.16	1	0.25	2	1	0	0.5	-0.75	-0.25	0.75
	13.2	0.5	1.25	2.25	1	1.25	-1.25	-0.5	1.25	-0.25			13.2	2	-0.25	1.5	0.5	1	-0.5	0.5	-1.25	0.25
	13.24	-0.5	1	1.5	-0.75	1	0	-1	0.5	0.25			13.24	1.5	-0.25	-1	-1.5	1.25	-0.25	0.5	-1.75	-0.5
	13.28	-1.75	0.5	2	-2.25	0.25	-0.75	-1	0.25	0			13.28	0.25	0.25	-0.5	-2.25	1	0.5	0.25	-0.75	-2
	13.32	-2	0.5	1	-1.5	-1	-1.25	-0.5	-0.25	-0.75			13.32	-2.25	-1	-0.25	-0.5	0.25	0.25	1.5	-0.25	-2.25
	13.36	-0.25	1	-1	-1	-1.75	-1.25	-0.25	-1.5	-0.75			13.36	-2.75	-0.5	-1	0.25	-1	-0.25	1.5	-0.75	-1.25
	13.4	2.75	1.75	-0.75	0	-0.75	-0.25	-0.25	-1	-0.5			13.4	0.75	0.5	-1.75	1	-1.5	0.5	-0.5	0	-1.5
	13.44	3.75	2.75	0	1	1.75	-0.25	0	-1.75	1.75			13.44	3.25	2.75	-1	1	-0.75	-0.5	-1.5	0.5	-1
	13.48	3.5	2.5	-1.75	1.5	3.25	-1.5	0	-2.75	3.25			13.48	2.75	2.75	-0.25	1	0	-2	-2	0	-0.25
	13.52	1.75	0.75	-2.5	2	1.5	-1.75	1.25	-1.75	1.75			13.52	0.5	1.75	0.25	1.75	-1	-1.5	-1	-1.5	-0.25
	13.56	-0.25	-1	-1.25	1.25	-0.5	0.5	2.5	0.5	0			13.56	-1.25	0.75	-0.5	0	-1.5	0	-0.25	-1	-0.25
	13.6	-0.25	-1.25	0	-0.25	-2	2.25	1	2	0.25			13.6	-1	1.25	-0.25	0	-0.75	1.25	0.5	0.5	0
	13.64	-0.75	-1.25	0.5	-1.25	-3.75	1	-1.25	1.5	1.25			13.64	-0.5	0.75	0.5	0.75	0	0.5	0.5	1.25	1.5
	13.68	-1.25	-2	-0.5	-1.75	-2.75	0	-1	1.25	2			13.68	-1.25	-1.5	-0.25	-0.5	0.75	-1	0.75	0.75	2.25
	13.72	-0.25	-0.5	-1.5	0.25	-1	-0.5	-1.25	1	1.5			13.72	0.5	-2.5	-1	-1	0	-2.25	-0.25	0	1.5
	13.76	1.5	-0.5	-1.5	-0.25	1.25	2	-1.5	0.5	0.5			13.76	2.5	-2.5	-1.25	-0.5	-0.25	-0.75	-1	-0.5	0
	13.8	2.75	-1.75	-0.5	0.5	2.75	2.75	-0.25	1.25	-0.5			13.8	4.25	-1.75	0	1.5	0.25	-0.25	-1.25	1	-1.5
	13.84	2.75	-1	1	0.5	2.5	1	2	2	-0.75			13.84	4	-0.75	1.25	1.75	-0.5	-0.75	-0.25	2	-1.25
	13.88	2.25	1.5	2.25	-0.5	1.75	-0.75	2.25	2.5	-0.5			13.88	2.75	1.75	2	0	-0.75	1	0.5	1.5	-0.25
	13.92	0.75	2	2.25	-0.5	1	-0.25	1	2	-1			13.92	1.75	3.25	1.5	-0.25	0.25	1.75	1.25	0	-0.75
	13.96	0.25	2.25	2.5	0.25	0.75	0.5	0.25	1	-0.25			13.96	0.25	2.5	1.75	0.25	0.75	0	2.25	-0.5	-0.5
	14	-0.25	2.25	2	1	1	-0.5	-0.25	0.25	1.5			14	-2.25	0	1.25	1.5	0	-2	0.75	-0.75	0.25
	14.04	-1.25	1	1	1.5	1	-0.75	-0.75	0.5	1.75			14.04	-3	-3	-0.25	2.5	-0.5	-2.75	-1.25	-0.25	0.25
	14.08	0	-0.5	0.5	-0.25	0.75	0	-1.75	0.75	2.25			14.08	-1.5	-3.75	-2	0.5	-0.25	-1.75	-0.75	-0.5	0.25
	14.12	1.75	0	0	-1	0.5	1	-0.5	2	2			14.12	1.25	-2.5	-3.5	-2	0	0.25	0.75	1	0.5
	14.16	2	0.25	0.25	-0.25	1	0.5	0.75	0.75	2			14.16	1.75	0	-1.75	-0.75	1.75	0.25	0.5	1	0.75
	14.2	1.5	-0.25	1	-0.75	1	0	0.75	-0.5	1.25			14.2	1.25	1.25	0.75	1	2.25	-0.5	-0.75	0.25	0.5
	14.24	-0.5	0	1	0.25	0.75	-0.5	0	-0.25	1.25			14.24	1.5	1	1.5	1.5	2.25	0	-0.25	0	1.25
	14.28	-0.5	1.25	0.5	1.25	0.75	0	-0.75	0.25	0			14.28	0.75	1.25	0.75	1.75	0.75	0	0.5	0.5	0.5
	14.32	-0.25	2	-0.25	0.5	1.5	0.25	-0.25	0	-1.25			14.32	-0.25	1.25	-0.5	0	0.25	-1.75	1	0.25	-0.75
	14.36	-1.5	0	0.25	0.25	2.75	0.75	0.25	-0.5	-1.75			14.36	-1	0.75	-2	-1.75	0	-1.75	1	0	-1
	14.4	-1.75	-1.75	1.5	0.75	0.75	0.25	0.75	-1.75	-1.25			14.4	-0.5	0.5	-1.5	-2.25	-0.25	0.25	-0.25	-0.5	-0.25
	14.44	-1	-1.5	1	0	-1	-2.25	1	-2.25	0			14.44	-1	1.25	1.5	-1.5	-0.75	0.25	0.25	-1	0
	14.48	-1.25	-1	0	-0.75	-0.25	-3	1.5	-1	1			14.48	-1.25	0.75	2.5	-0.75	0.25	0.25	1.5	-0.5	0.25
	14.52	-1	-0.5	0.25	0.75	0	-0.25	1.5	0.5	0.25			14.52	-0.75	0	1.25	-0.25	-0.25	1	2.25	0.75	0
	14.56	0.5	-0.25	0.5	1.25	0.5	3.75	0.5	0.5	-0.75			14.56	0.5	0.5	0.5	0.5	-0.5	3.25	2	0.5	0
	14.6	2.25	-0.25	-0.25	1	1.25	2.75	-0.25	0	-0.75			14.6	2.25	0.25	0	1	-0.75	3	1	-0.25	0
	14.64	3.75	-0.75	-0.5	0.5	1.75	0	-0.5	1.5	0.5			14.64	3.25	-1.25	-2.75	0.5	-1	0.25	-0.25	0.75	0.75
	14.68	3.25	-0.75	-1	-1.25	2.25	-1.75	1	2	1.75			14.68	2.75	-1.5	-4.5	-0.75	-0.75	0	-0.25	1.5	1.5
	14.72	0.75	-1	-0.25	-1.75	1.5	-0.75	0	1.25	1.75			14.72	0.75	-2	-2	-2	-0.5	1	-0.75	0.5	0.75
	14.76	0.75	1.25	-0.25	-0.5	1	1.25	-0.5	0	1.75			14.76	0.25	-1.25	-1	0	0.75	0.25	-1.25	-1.25	-0.25
	14.8	1.25	2.5	-0.25	0.5	-1.25	1.25	-1	-1.5	1			14.8	-1.75	0	0.75	2	1.25	-1.25	-1.25	-2.25	-0.25
	14.84	1.25	0.25	0	1.5	-3	1	-1	-3.5	-0.25			14.84	-1.75	-0.75	2.75	2.5	0.5	-1.5	-2	-3.25	-0.75
	14.88	1.75	0.25	-0.25	2	-2.25	1.25	0	-1.75	-1.5			14.88	-1	-0.75	2	1.5	-0.5	0.5	-2	-2	-2
	14.92	0.5	1	-0.5	2	-0.75	1.25	0.5	-0.25	-1.25			14.92	-1.25	-1	0	0	-0.5	1.5	-1	-0.5	-2
	14.96	0.75	2	0.75	1.25	1.25	1.25	-0.25	0.5	-0.75			14.96	-0.5	1	0	-0.25	1	1	0.5	-0.75	-0.75
	15	1.75	1.75	2	1	2	0.5	-1.5	2.5	-0.25			15	2	1.75	-0.25	0	3	0.75	-0.25	-1	-0.25
	15.04	1.5	0.75	1	0.25	1	0.5	-1.75	3.5	-1.25			15.04	1.5	1.75	-0.25	0.25	2.25	-0.25	-1.5	0.5	-1.25
	15.08	1.5	-0.25	0.75	0.5	-0.25	0	-0.75	3	-1.25			15.08	1	0	1.25	1	0.5	-0.25	-2	1.25	-1
	15.12	1	-0.75	0.75	0.75	0	-0.5	0.75	1.25	0.25			15.12	0.5	-1.25	1.25	1	0.5	-1	-0.5	1.25	0
	15.16	0	-1.5	1	-0.25	-0.5	-1.25	1.5	-0.5	0.75			15.16	-0.5	-0.75	1	0.75	0.25	-1.5	0.25	1.25	1
	15.2	-0.5	-0.5	1	-2.5	-1	0	0.5	-1	1.5			15.2	-0.75	0	1	0	-0.5	-1.75	0.5	1.25	1.75
	15.24	0.5	0	0.5	-2.5	0.75	1.25	-0.75	-1.5	1.5			15.24	-1	0.75	0.75	0.75	0.5	-0.25	0.25	0	1.75
	15.28	1.25	-0.75	-0.25	-0.25	1.75	0.25	-1	-1.5	1.25			15.28	-2.25	0.25	-0.75	2	1.5	1.25	0.25	-1	0.25
	15.32	-1	-1.75	0.5	0.5	1.75	-2.25	0	-0.5	-0.25			15.32	-2	-0.75	-0.75	0.5	1	0.5	0.5	-0.5	-1.5
	15.36	0	-1.25	1	-0.75	1.25	-2.5	1.75	1	-0.5			15.36	0	-1.25	0.25	-1.25	-0.75	-1.5	1.5	2	-2.75
	15.4	2.25	1	1.25	-0.25	0.5	-1.25	2	2	-0.75			15.4	1.75	-1	1.5	-0.25	-1.25	-2.25	2	2.5	-2.25
	15.44	2.25	2.25	0.75	-1.75	0.5	0.5	0.5	1.75	-1			15.44	1	0	1	-0.5	-1.5	-2.5	1.5	0.75	-1.5
	15.48	1.75	1	-0.75	-2.5	0.5	2.5	-1.25	-0.25	1.25			15.48	-0.25	0	-0.75	-0.25	-1.75	-2	-0.25	-2.75	1
	15.52	0.75	-0.75	-0.75	-1.25	0.25	1	-2.25	-1.25	2.25			15.52	-1.5	-0.75	-1.25	0.5	-2.25	-1	-1.5	-2.5	3
	15.56	0.5	-0.5	0	-1.5	-1.5	0	-1.5	0.25	1			15.56	-1.5	-1.5	-0.75	-1.5	-2	-0.75	0	0.25	2.5
	15.6	0.5	0.75	-1	0	-2	-0.75	0	1	-0.5			15.6	-0.5	0	-0.25	-2.25	-0.5	0.25	0.25	1	1
	15.64	-0.25	1	-1.75	1.25	0.5	-0.75	-1.5	1	-1.5			15.64	0.25	1.25	1	-1.75	1	0.75	-1.25	-0.25	0
	15.68	-2	1.25	-0.5	1.25	2.5	-1.25	-1.25	0.5	-0.5			15.68	0	2.5	2	-0.5	1.5	-0.25	-1.75	-0.5	0.5
	15.72	-2.75	1.5	1.5	0.25	0.75	-2.75	-2	-0.25	0.75			15.72	-0.5	2.5	0.5	0.75	-0.5	-1.25	-1.75	-0.25	1.25
	15.76	-2.5	0	1.25	-0.25	-0.75	-3.25	-1.5	1	1			15.76	-0.5	0.5	-2.25	1	-1.25	-2	-0.75	1.25	1.75
	15.8	-0.75	-1.75	-0.25	-0.5	-0.5	-3	0.25	2.25	0.5			15.8	-0.25	-1	-3.5	0	-0.25	-1.5	-1	2.5	1.75
	15.84	0.25	-1.25	-2	0.25	-0.5	-0.25	1.25	3	1.75			15.84	0.25	-1.5	-3	0	0.75	0.25	-1.5	2.75	1.25
	15.88	1	-1.75	-2	1	-0.5	0.75	1.25	2.25	2			15.88	0.75	-2	-1.5	-0.5	1	0.5	-1.25	1	1
	15.92	0.25	-0.5	-0.5	0.5	-0.25	0.25	0.75	0	-0.25			15.92	1	-1.75	0.5	-0.5	0.25	0	-0.5	-0.25	-1
	15.96	1.75	1.5	0.75	-0.25	-2	1.25	-0.75	0.25	-2.5			15.96	0.5	0	2.75	-0.75	-0.75	1	-0.25	-0.5	-1
	16	3.25	2	2	-0.5	-1	0.5	-1	0.5	-2			16	1.5	1	3.75	-0.25	-0.25	1.25	0.75	-1.5	-0.25
	16.04	1.75	0.75	2.5	0.25	0.75	-0.5	-1.25	-0.25	-0.75			16.04	1.25	1.5	3.5	-0.25	0.5	-0.5	0.5	-2.25	0.5
	16.08	0	0	2	1	0.5	0.75	-0.5	-1	0			16.08	-0.5	2.5	2.75	-0.5	-0.75	-1	0.25	-2.25	0.75
	16.12	-1.25	1.5	2.75	0.25	0	1.75	1	0.5	1.25			16.12	-1.25	3.25	1.75	-0.75	-1	0.25	0.5	-1	-0.5
	16.16	0.75	1.25	1.75	0	-1.5	1	2	-0.25	2.5			16.16	-0.25	2	0.25	-0.5	0	0.25	1	-1.25	-0.25
	16.2	3	1.25	-0.25	0.5	-1.75	-0.25	0.75	-2	2			16.2	1.5	1.25	-0.25	0.75	0	0	0.5	-1	0.75
	16.24	4.25	0.75	-1.25	0.5	0.25	-0.75	0.25	-0.75	0.5			16.24	2.25	-0.25	-1.25	1.25	-0.75	0	0.5	1.5	0
	16.28	3.25	-0.5	-1.25	-1.25	1.25	-0.25	1	2	-0.25			16.28	2.25	-1.5	-3	0.75	-1.5	1.5	0.75	2.25	-1
	16.32	0.25	-1.25	-1.5	-0.5	1.25	-0.75	1.25	3.5	-0.75			16.32	0	-1	-3.75	0.5	-1.25	2.25	0.25	2.25	-1
	16.36	-2	-2	-0.5	-0.5	-0.5	-1	0.75	1.5	-1.5			16.36	-0.5	-0.5	-2.75	0.25	-2.25	1.5	1.5	0.75	-1.75
	16.4	-1.5	-2	0.5	-1.5	0.5	0	0.25	-1	0			16.4	-2	-0.25	-1.25	-0.75	-1	0.5	1.5	-1.5	-1.75
	16.44	-0.5	-1.75	2	-2	1.75	0.25	-1.25	-1	1			16.44	-2	-1.75	1.25	-2.75	0	-1.25	0.75	-2.25	-1.75
	16.48	-0.75	-0.75	2.25	-0.5	1.5	-0.25	-2.75	-0.75	1.5			16.48	-1.5	-2.25	1.5	-1.75	0.5	-2	1.25	-2	-0.25
	16.52	-0.25	0.75	0.75	-0.5	1	-1.25	-3	-0.75	1.25			16.52	-0.25	0.25	-0.5	-0.75	1.25	-0.75	0.75	-1	0.75
	16.56	0	2	0	-1.5	0.75	-2.75	-1.75	1	1			16.56	0.25	2.5	-1.5	0	1.5	-2	-1.75	0	1.75
	16.6	0	1.75	-1.25	-1	0	-2	-0.25	2.25	1			16.6	-0.25	1	-1.75	0.75	-0.5	-3.25	-2.75	0.5	2
	16.64	0.25	0	0.75	0	0	0.5	-0.25	2.75	1.25			16.64	-1	-0.5	0.75	1	-0.5	-0.5	-1	0.75	1.5
	16.68	0.25	-1.5	1.75	0	-0.25	1.25	-0.25	0.5	0.25			16.68	-1.25	-0.5	1.5	0.25	-0.25	1	0	-0.5	0.5
	16.72	-1	-1.5	-0.75	0.25	-0.25	0.5	-1	-0.25	-1.5			16.72	-0.5	-0.5	0	0	-0.25	0.25	0.5	-0.5	-0.75
	16.76	-1.5	-0.25	-2	-0.25	0.75	-1.5	0.25	-0.75	-3.5			16.76	-0.25	1.25	-2.25	-0.25	0.25	-1.25	2	0.5	-2.25
	16.8	-0.25	-0.5	-1.25	-1	1.75	-1.5	1	0.5	-3			16.8	-0.5	0.75	-2.25	0.25	0.5	0.25	0.75	0.25	-3
	16.84	-1.25	-0.25	0.5	0.25	1.25	-1.25	1	1.25	-0.5			16.84	-2.25	-1.25	0.5	0.25	0.5	0.25	0.25	-1.25	-0.5
	16.88	-0.5	0.75	0	0.75	0.5	-0.75	0.5	0.5	0.5			16.88	-1.5	-1.25	1.25	0	0.25	-1.25	0	-1.25	-0.5
	16.92	0	0.25	-0.5	1.5	0.5	-0.75	-0.5	-0.25	1.5			16.92	0.25	-1.5	0.75	0.75	-0.75	-1.5	-0.75	-0.75	0.25
	16.96	0	-0.75	0.75	1.5	-1	-1	-1	0	1			16.96	0.75	-2	1	1	-1.25	-1	-0.5	0	0.75
	17	0.75	0	2.5	0	-2	-0.5	-1.25	-0.5	-0.25			17	0	-2	2.5	0.25	-1.25	-0.75	-0.5	-0.25	-0.5
	17.04	0	0.5	0.75	-1	-1.5	0	-2.25	0	-1.25			17.04	-0.5	-1.5	0.5	0.25	-0.5	0.25	-0.25	0.75	-0.5
	17.08	-0.25	1	-1	-2.25	0	-0.5	-2	0	-0.25			17.08	0.5	-0.75	-1.75	-0.75	1.5	0.75	-1.25	1	0.75
	17.12	0.25	1.5	-0.5	-3	0.25	-0.5	-1	-1.25	-1.25			17.12	1.25	1	-2.75	-2.5	1.25	-0.25	-1.25	-1.75	0
	17.16	0.25	1	-1.5	-2.25	0.75	0	-0.75	-2.25	-1.75			17.16	0.75	2	-2	-2	0	0.25	0	-2	-0.5
	17.2	0.75	0.5	-2.25	-2	1	0.5	0	-0.5	-0.25			17.2	0	2.25	-0.75	-1.75	-0.75	0	0.75	-0.25	0.5
	17.24	1.75	0	-1.5	0	0.5	0.75	0.25	0	0			17.24	0.25	0.75	0.25	0.25	-1.25	-0.5	-0.25	0	0.75
	17.28	1	-0.25	1	3.25	-1.5	1.5	-0.5	0	0.25			17.28	-0.5	-0.5	0.75	1.75	-2	-1	-1	0.25	0.5
	17.32	0	-0.25	2.5	2	-2.75	1.25	0.5	-0.25	0			17.32	-0.25	-1.25	0.25	0.5	-1	-1.25	-1.25	0.75	0.75
	17.36	0.75	0.75	1.75	0	-1.25	0.5	0.25	-0.5	-0.5			17.36	-0.25	-0.5	-0.5	0.5	-0.25	-0.75	-1.5	0.75	0
	17.4	0.5	0	0	-0.75	0.25	-0.75	0.75	-2	-0.25			17.4	0.25	-0.25	-1	2.5	0	-1.25	-0.5	0.25	-0.5
	17.44	1.25	-1	-1.75	0	2.25	-1.5	0	0	1			17.44	0.5	-1.5	-2.25	2.75	2	-2	-0.75	0.5	-0.75
	17.48	0	-1.75	-1.5	-0.75	1.75	0.25	0	1.25	-0.75			17.48	-1.5	-2	-1.25	-1	2.25	0.75	-0.75	0.5	-1.25
	17.52	-0.75	-1.5	0	-2	0.75	1.75	-1	0.25	-1			17.52	-3	-1	-0.25	-3.5	1.5	3.5	-0.5	-0.75	0
	17.56	-1.25	-0.5	-0.5	-1	-0.25	0.75	-1	-0.25	1.25			17.56	-0.75	0.25	-0.75	-1.75	0.5	1.5	-0.25	-1.25	2
	17.6	-0.5	1	-1.25	-1	-1.25	0	-0.5	0.5	2.25			17.6	1	1.5	-1	0	-1	0.5	0	-0.75	1.75
	17.64	0.5	1.75	-1	-2.25	-2.5	0	1.25	0.75	2.5			17.64	1.5	2	-0.5	0.5	-2.25	0.5	0.25	-0.25	1
	17.68	0.25	0	0	-1.25	-0.75	0.75	2	0.25	2.25			17.68	0.75	-0.5	-0.25	1.75	-0.25	1.5	0.75	-0.5	2
	17.72	-1	-1	0.25	0.75	0.75	0	1.5	-1.75	0.5			17.72	-0.25	-1	0.5	2.75	0.5	0.5	1	-2.25	2
	17.76	-0.25	-1.5	1	1.5	0	-1.5	-0.25	-1.5	-1.25			17.76	-0.5	-1	2.5	2.5	0	-1	0.25	-2.5	1.25
	17.8	1.25	-0.5	1	0.25	0	-2.75	-1.75	1	-1.25			17.8	0.75	-0.25	3	1.5	0.75	-2.5	-0.75	0.25	-1
	17.84	2	1.5	0.25	-0.5	0.25	-3.75	-0.25	1.5	-1.75			17.84	1.25	0	1	-0.25	1	-1.75	0.25	2.25	-2
	17.88	2.75	0.25	0.75	-0.75	-1	-1	-0.75	2.25	-1			17.88	0.75	-0.5	0.5	-2	1.25	1	0	3.75	-1
	17.92	0.75	-0.5	1.5	-0.5	-0.25	-0.75	-2.25	2	1.25			17.92	0	0.25	-0.25	-1.25	2.25	-0.25	-0.25	3	1
	17.96	-1.5	1.25	0.75	-0.5	0.25	-1.5	-1	0.5	2.25			17.96	-1.5	2.75	-0.75	-0.25	1.75	-1.75	1	1	2.25
	18	-2.25	2.5	1	-0.75	0.5	0	0.75	-1	0.5			18	-3.25	3.25	0	-1	-0.25	-0.5	2.75	-1.25	1.5
	18.04	-1.75	2.25	0.75	0.25	0.5	1.5	0.5	-1.75	-1.25			18.04	-1.5	2	-0.25	-0.75	-1.25	1.75	3.5	-1.75	0
	18.08	-1.25	0.5	0	1	-0.5	-0.75	-0.25	0	-1			18.08	-0.25	0.5	-1	0.5	-1.25	0.25	1.75	0	0
	18.12	0	-1	-2	1	-0.75	-2	-0.75	1.5	-0.5			18.12	0	-0.5	-2	1.5	-1	-1	0.5	1.5	-0.75
	18.16	0.75	-1.5	-2.75	0.5	-1.5	-1.5	-1.5	0.25	0			18.16	0.5	-1.5	-1.25	1.25	-1.25	-2.25	-0.5	1.5	-1
	18.2	0.5	-1.75	-1	-1	-1.25	-1.25	-1.25	-1.25	-0.5			18.2	0.75	-1.5	0.5	-1	-1	-1.75	-1.75	-0.5	-1
	18.24	1.25	-2	0.75	-0.75	-1	1.25	-0.5	-1.5	0.75			18.24	1	-1	1.25	-1.75	0.25	0.5	-0.75	-1.75	-0.5
	18.28	-0.75	0.75	0.75	-0.25	-1.25	2.75	0	-0.5	0.75			18.28	-0.75	1	2	-0.5	0.75	0.75	-0.5	0	-0.5
	18.32	-2	2	0.25	-0.25	-0.5	1.75	0.5	0.5	0.5			18.32	-1	1.75	1	-0.5	1.75	-0.5	-0.5	1.5	-0.5
	18.36	-0.5	0.75	1.25	-0.5	0.5	-0.75	0	0.75	0.75			18.36	0.5	1	-0.25	-0.5	1.75	-0.75	-1	2	0.25
	18.4	1	-1.5	1.5	-2	0.5	-2.25	0	1.75	1			18.4	1.5	-1	0.75	-1.75	0.5	-0.5	0	1.75	0.5
	18.44	0.5	-1.5	-0.25	-2.25	0	-1.5	1.25	1.25	1			18.44	2	-1.5	1.5	-2	-1.5	-0.25	2	0.25	1
	18.48	-1.25	-1.75	-1.5	-1.75	0.75	0.75	0.5	0	1.75			18.48	1.25	-1.75	0.25	-1.5	-2.25	1.25	2.5	-1.75	1.75
	18.52	-1	-2.25	-0.25	-1	1.75	0.5	-0.5	0	1.75			18.52	-0.5	-1.75	-0.5	0	-1.75	1	1.75	-0.75	1
	18.56	0.5	-1.5	0.5	-1	2	0.75	-0.5	-0.25	-0.5			18.56	-0.5	-0.75	-0.25	1.5	0.25	0.75	0.75	-0.5	-0.5
	18.6	-1.5	0.75	0	-0.75	1	2.5	-1.25	0.25	-4			18.6	-1.75	1.25	0.75	1.75	1.25	1.25	0.75	-0.5	-2
	18.64	-1.75	1.75	-0.75	-0.75	2.25	4.25	-1.75	0.5	-3			18.64	-2	1.5	1.25	2	1.5	1	0.5	-0.5	-1.25
	18.68	0.25	1	-0.25	-2.25	2.25	1.75	-2	0	-0.25			18.68	-0.75	1.25	0.5	0.75	1	-1.25	-1.75	-1	-1
	18.72	0.25	1.25	0.5	0.25	1.25	-1	-2.75	0.75	1.5			18.72	-1.25	1.25	0.25	0	0.5	-2	-4.75	0.25	-1.25
	18.76	-1	-0.5	0.75	1.5	0.75	-1.25	-2	0.75	2.25			18.76	-2.75	0.25	0.25	-0.5	1.25	-1.5	-4.5	0.75	0.25
	18.8	0.5	-1.25	-0.25	0	0.25	-1.25	-0.5	-0.25	2.25			18.8	-2	-0.25	0	-1	2	0.25	-2.25	1.75	1
	18.84	1.75	-0.75	-2.5	-1.75	-0.75	-0.75	-0.75	-0.25	1.5			18.84	0	0.25	-1.75	-2.5	-0.5	1.5	0.5	1.5	1.5
	18.88	2.75	-1	-2.25	-2.75	-2	-0.25	0	-0.25	-1			18.88	1.5	0.75	-1.75	-2	-1.25	1.25	1.25	0	0.25
	18.92	3	0.5	-0.75	-1	-1.75	0.75	1.75	-0.75	-2.25			18.92	2.5	0.75	-0.25	0.25	-1	1	1	-1	-0.5
	18.96	3	2	1	1.5	-0.75	2	0.5	-0.5	-1.75			18.96	2	1.25	-0.25	1.75	-1	0.75	0.25	-1.25	-0.25
	19	2.25	1	0.25	0.75	-0.75	0.25	-1	0.75	-0.25			19	1.5	-0.25	-1.25	1	-2.5	1.75	-0.5	0.75	0.25
	19.04	1.75	1	-0.75	-1	-1.75	-2.5	-0.75	-0.5	2			19.04	1.25	-0.75	-0.75	-0.75	-3	0	0.25	0	1.5
	19.08	1	-0.5	-1.75	-0.25	-1.25	-1.75	-0.75	-1.25	0			19.08	0.5	-1	0	0.75	-1	-1.5	0.75	-1.25	-0.5
	19.12	2.25	-1	-2.25	-0.5	-0.25	0	-0.5	-1.5	-1.25			19.12	1.5	-0.25	0.25	1.5	0	-1.25	0.25	-0.75	-2.25
	19.16	2	-0.75	-1.5	-1.25	0.75	0.25	0.25	-2.75	-1.5			19.16	2.5	0	-0.25	0.25	-0.75	-1	-1	-1.25	-3
	19.2	0.5	-1	-1	-0.75	1.5	-0.75	-0.75	-2.25	-1.25			19.2	3	-1.25	0.25	0.25	-0.25	-1.75	-2.25	-0.25	-2.5
	19.24	-0.5	-1.5	0.5	-0.25	1.75	-1.75	-1	-1	-0.5			19.24	2	-2.5	0.25	-1	1.5	-2.25	-2	1.75	-1
	19.28	-2.75	-0.75	1.25	0.25	0.75	-1.25	-1	0.75	-0.75			19.28	-1	-1.5	-1	-1	1.75	-0.5	1.5	3.25	-0.25
	19.32	-2	-0.75	0.5	-0.5	-0.75	-0.25	-1.25	0.75	0			19.32	-1.5	0	-0.75	-0.75	0.5	-0.25	2.75	3.5	0.5
	19.36	-0.25	-0.75	-1.25	-1.25	-1	-0.25	-0.5	-0.5	1.25			19.36	-0.25	-0.5	-1.75	-0.5	-0.25	0.75	2.75	2.25	0.25
	19.4	1	0	-1	-0.5	-1	-1.5	0	-1	0.5			19.4	1.5	-1	-1.5	0.25	-0.25	1.75	1.25	0	0.5
	19.44	1.75	-0.75	0	-1.5	-0.5	-2.75	-0.5	-0.75	-1.25			19.44	3.25	-0.75	-0.25	0	-0.75	0	-0.75	-2.5	0
	19.48	1	0	2.5	-1	-0.5	-3	-1.25	-1	-2.5			19.48	2	1	1.5	0.25	-0.5	-0.5	-1	-4	-0.25
	19.52	-0.5	2	1.5	-0.25	-1.75	-2.5	-2.5	0	-2.25			19.52	0.25	2.75	0.75	1.25	-1.5	0	-2	-2.5	-0.25
	19.56	-1.25	2.25	0.5	-0.5	-1.75	-0.25	-1	0.75	-1.75			19.56	-1.75	2	-0.5	1.25	-2	0.5	-1.5	-1	-1.5
	19.6	-0.75	1.75	-1	-1.25	0.25	2.5	1.25	3	-0.5			19.6	-2	0.75	-2	-0.5	0.75	0.5	-0.75	1	-1.5
	19.64	0.25	1.25	-2	-3	2	1.75	1	2	-0.75			19.64	-1.5	0.5	-1.75	-1.75	1.75	0.25	1.25	0.75	-0.5
	19.68	1.25	1.5	-1.75	-3.25	1.5	1.5	-1.25	0.5	0			19.68	0.25	1	0	-1.25	1.25	1.25	1	0	-0.25
	19.72	2.5	0.5	-1.5	-2	1	0.75	-1.25	-0.25	-1.25			19.72	2.75	1	1	-1.75	0.75	0.75	0.25	-0.25	-1.5
	19.76	1.75	-0.75	-0.25	-0.75	0.5	-0.25	1.75	-0.75	-0.5			19.76	0.5	0.5	2.75	-2.25	1	0.25	0.75	-0.75	-0.75
	19.8	1.25	-1.5	0.5	0.5	0.5	-0.75	2.75	-2.25	1.5			19.8	-2.75	-0.5	3	-1	1	-1	1.25	-1.25	1
	19.84	1.25	-0.25	0.75	0.25	-0.25	-1.25	0.5	-3.5	1.75			19.84	-3	-1	2.25	1.25	0.25	-1	0.75	-1.25	1.75
	19.88	0.25	-1.75	1	-1.5	-1.75	-2.75	0	-1.75	1			19.88	-1.75	-1.75	0.25	1.5	0.25	-1.75	1	-0.75	1.25
	19.92	-0.5	-4.25	1.5	-0.75	-1	-1.5	-0.25	-1.5	1.5			19.92	0.25	-2.25	-0.75	1.25	0.25	-1.75	-1	-0.5	1
	19.96	0	-3	1	0.75	0.75	-1.25	0.25	-1	-0.5			19.96	0.75	-0.5	-1.25	1.5	0.25	-0.75	-1.75	0.75	0.25
	20	0.5	-0.25	0.75	-0.25	1.25	0.25	1	-0.25	-2			20	0.5	0.75	-1.5	0	0.25	0.75	0	2.25	0
	20.04	-1.25	1.5	0.5	0.5	0	-0.5	1	1.5	-0.75			20.04	-1	1.5	-1	1	-0.5	0	0.25	2.5	0
	20.08	-1	1.5	-0.25	1.5	0	-0.5	0	2	0.25			20.08	-0.75	1.25	-1	2.5	-0.5	-1.25	0.5	1.75	0
	20.12	-1.5	0.75	-0.25	2.75	-1.25	-0.75	-0.75	1.75	0			20.12	-0.75	0.75	-0.75	1.75	-1.75	-2.5	0	0.25	0.5
	20.16	-1.5	-0.25	-0.5	2.25	-2	-0.75	-0.25	0	-0.5			20.16	-0.5	0	-1	1	-2.5	-2.5	1	-2	1.5
	20.2	-1	0.5	-1	-0.5	-1.25	-0.75	0	-1	-0.25			20.2	-0.5	-0.5	-1	0	-2	-0.25	1.25	-1.25	1.25
	20.24	0	0.75	-0.5	-2	-0.25	-0.25	0	-2	0.25			20.24	0	1	0.75	-1	0.25	1.5	-0.5	-0.5	2
	20.28	0.25	-0.5	0	-1.75	1.75	-1.25	0.25	-2.5	-0.25			20.28	0.25	2	1.5	-0.75	2	1.25	-0.75	-0.75	1.5
	20.32	-0.5	-0.5	0.25	-0.75	3	-2.25	-1.75	-1.25	-0.5			20.32	-0.5	2	1.25	-0.25	2.5	-1	-1.25	-0.75	-1.25
	20.36	-1.25	-0.75	-0.5	-1.5	2.25	-2.5	-4	-1	-0.5			20.36	-1.25	0.25	-0.5	0.25	1.25	-1.25	-1.25	-0.25	-1.75
	20.4	-1.75	-1	0.5	-3.75	0.75	-1.5	-4.25	-1.25	-1			20.4	-0.5	-2.25	-1.25	-1.75	0.75	-1.5	-1.75	-1.75	-1
	20.44	-1.75	-0.25	1.5	-2.25	-0.25	0	-2.25	-1	-1.25			20.44	0.75	-2.25	0	-1.25	0.75	-2	-1.25	-2	-0.25
	20.48	-0.75	0.75	0.5	-1.5	-1.75	0.5	-1	-0.5	0			20.48	0	-0.75	0.25	-0.25	-1	-1.25	-1.75	0.5	0.25
	20.52	0	-0.5	-0.25	-1.25	-3.25	0	1.25	-0.75	0.75			20.52	1.5	0.75	-0.25	-0.75	-2.75	1.5	-1	1.5	0.5
	20.56	1.75	0.25	0.25	-0.75	-2.25	0	-0.25	-0.75	0.25			20.56	1.5	2	-0.75	-1.25	-2.25	2.75	-0.25	0.5	-0.75
	20.6	1	0.5	0	2	-1.75	0.25	-1.5	-2.25	-0.25			20.6	1	1.25	-0.5	0.75	-1.5	1.25	-1	-1.25	0.25
	20.64	-0.5	-0.75	1	2.5	-1.25	0.25	-2	-3.5	0			20.64	0.5	-0.25	1	1	0	0.5	-1.5	-1.5	1.75
	20.68	-1.75	-0.25	0	1.75	-0.5	-1.25	-1.25	-2.5	-1.25			20.68	-2	-0.75	1.75	1.25	0.25	-1	0.75	-0.5	-0.25
	20.72	-1	-0.25	0.5	1.25	-0.25	-0.75	-1.25	0.25	-1.25			20.72	-2.75	0	0.75	0	1.25	-0.5	0.75	1	-0.25
	20.76	0.75	0.25	-0.25	0.75	-0.25	-0.75	-1.5	1.25	-1.5			20.76	0.25	-0.5	-1.25	-1.25	0.75	0.25	2	2	0
	20.8	0.25	1.25	-1	0.25	-0.75	-1.75	-0.75	1.25	-2			20.8	1.5	0	-2	-1	0.25	-0.5	2.25	2	-0.25
	20.84	-1.25	1.25	-1.75	-2	-0.5	-2.75	-0.5	0	-2.25			20.84	0.75	0.5	-2	-0.75	-1	-1	0.25	1.25	-0.75
	20.88	-1.75	-0.5	-2.25	-3	-0.5	-1.25	-1	-0.25	-1.75			20.88	0.5	0.5	-1.5	-0.5	-0.5	-0.25	0	0	-1.25
	20.92	-1.25	-2	-2.25	-1.5	-0.75	0.75	-1.75	1	-0.25			20.92	0.5	-0.5	-1.25	1.25	0.25	1.75	0.5	0.25	-0.25
	20.96	0	-1	-1	-1.5	-1.25	0.25	-2	1.25	0.5			20.96	1.75	0	-0.5	0.5	0	1	-0.25	0.25	0.75
	21	1.25	-0.25	1.5	-2	-0.5	-0.25	-0.75	1.25	0.25			21	2.5	1.25	0.5	0	0.25	0.5	1	-0.5	0.25
	21.04	1	0	2	-1	1.25	-0.25	0.25	1.5	-0.75			21.04	1.75	2.25	0.75	1	0.25	-0.5	0.75	-0.5	0
	21.08	0.5	0.25	0	-0.5	0	-1	0	0.75	-0.5			21.08	0.25	2.5	0.75	0.5	-0.75	-1.75	-0.75	0.25	0.25
	21.12	-0.25	0	-2	-0.5	-1.25	1.25	-0.5	-1.25	0			21.12	-0.5	0.25	0.5	0.5	-1	0	-1.5	1.5	0
	21.16	-1.5	0	-0.25	-2	-0.5	1.5	0	-2	-0.25			21.16	-1	-1.25	0.75	0	-1.25	0.75	-0.5	2	0.25
	21.2	-1	0.25	0	-3.25	-0.75	-0.25	-0.75	0.25	-0.75			21.2	-1.75	-1.5	0.75	-0.75	-0.5	1.5	0.75	1.5	0.5
	21.24	0.5	-1.5	-0.25	-2	-1.25	-1	-1.5	0.5	-0.25			21.24	0	-1	0.75	-0.5	0.5	1.25	1.25	-0.25	0.75
	21.28	1	-3	-0.25	-0.5	-1.25	-1	-3	-0.75	-1			21.28	1.25	-1.75	1	-1.25	0.5	1.25	-0.75	-2	0.75
	21.32	0.75	-2.5	-1.25	-1	-0.75	-1.5	-2.5	-1.75	-1.5			21.32	0	-1.25	0.5	-1.75	0.75	0.25	-3.5	-1.75	1
	21.36	-0.25	-1.5	-2.25	-2	-0.5	-2.75	-0.75	-2	0			21.36	-1.5	-0.25	-1	-2.75	0.25	-1.75	-1.25	-2.75	0.5
	21.4	-1.25	-0.25	-2.25	-0.5	0.75	-2.5	0.5	-2	1			21.4	-1.25	-0.25	-2	-2.5	0	-2	1.5	-2.75	-1.5
	21.44	-2.25	0	-1.25	1.5	1	-1.25	-0.5	-1.25	0.75			21.44	-0.5	0.5	0	0.75	0	-1.75	1	-1.25	-2.25
	21.48	-2	0.25	1	1	-0.5	-0.25	-1.75	-1	0.5			21.48	-0.5	0.75	0.5	2.25	0.75	-2.25	-0.5	-1	-0.5
	21.52	-1	0.5	2.5	-0.25	0	0.5	-1.5	0	1.25			21.52	-1.25	-0.5	0.75	0.75	1.5	-2	0.5	0.25	1
	21.56	-0.75	-0.25	1.25	0	1.75	0.25	-0.25	0.5	-0.5			21.56	-1.75	-1.75	0	-0.5	0.75	0.5	1	1	0.25
	21.6	-1	0.25	-0.75	0.25	1.75	-0.25	0	-0.5	-2.5			21.6	-1.25	-1.5	-1	-0.25	-0.25	0.75	-0.25	-0.25	-0.5
	21.64	-0.5	0.25	-2.25	-0.25	-0.25	-0.75	-1.75	-0.25	-2			21.64	-1.25	0.25	-2.25	1	-1.25	-0.25	-2.25	0.75	-0.25
	21.68	-0.75	-1.75	-1.5	-0.5	-2.25	-1.25	-1.5	-0.75	-1.5			21.68	-1.25	0.25	-1.5	1.5	-1	-1	-2.25	1.25	0.5
	21.72	-0.25	-4.25	-0.25	-0.75	-2.75	-1	-0.5	-1.5	-1.75			21.72	-0.5	-2	0.25	0.5	-0.5	-1	-1.25	1	0.75
	21.76	1	-4.25	0.5	-0.25	-2.25	-0.25	0.75	-0.75	-3.25			21.76	0.75	-3.75	1	-1.5	-1	-1	0.25	1	-1.5
	21.8	0.75	-2.75	-0.75	0	-1	0.75	1.5	-0.5	-2.5			21.8	2.75	-2.75	1.25	-2	-1.25	-1	2.25	1	-2.5
	21.84	0.25	-2.25	-1.75	1	-1.25	0	0	-0.5	-1.5			21.84	3	0	-0.25	-0.5	-0.5	-1.25	2.75	0.5	-2.25
	21.88	0	-1	-1.5	0.75	-0.5	-0.25	-1	0	-0.25			21.88	1.5	1.5	-1	0.5	0.5	0.75	1.75	0.25	-1.25
	21.92	0.25	-1.5	-2	-0.25	-2	-1.25	-1	-1.25	1.75			21.92	1.5	-0.75	-2	0.5	1.25	1	0.75	-0.75	0
	21.96	1.25	-1.5	-1.75	-1	-2	-2.25	-0.75	-1.25	1.5			21.96	2	-0.5	-0.75	-0.5	0.5	-0.25	0	0	0.5
	22	-1	-1.75	0.25	-0.25	-0.75	-3	0	1	0			22	-0.25	0	1.25	0.75	-1	-1.5	0	1	0.75
	22.04	-1.5	-1.25	-0.25	-1.25	-0.25	-1.25	-0.25	2	-0.25			22.04	-1.5	0.75	1.25	0.25	-1.75	-1	0.25	1	2.25
	22.08	-0.75	-0.25	-1	-4	-1.25	-1	-0.75	0.75	-1.25			22.08	-1.5	1.75	1	-2.25	-2.25	-0.5	-0.5	1.25	1.75
	22.12	0	2	-0.75	-4.75	-1	-1.25	-0.25	-2.5	-1.5			22.12	-1.5	2.5	0.25	-3.5	-2.25	0.75	-1.25	0	1.75
	22.16	1.25	2.25	0	-3.75	-0.25	-2	1	-3.5	-1.5			22.16	-0.5	1.25	-1	-2	-0.5	0.75	-0.5	-1.25	1.25
	22.2	0.75	1.25	0.5	-2.5	0	-2.5	-0.5	-3.25	-0.5			22.2	-0.75	-0.25	0.5	-0.75	0.5	-0.25	-0.5	-2.75	1
	22.24	-1.5	-0.25	2.5	-2.75	-0.25	-2.75	-1.75	-0.25	-1			22.24	-1.5	-1.25	2.75	-1	1.25	-0.75	-0.75	-1	2
	22.28	-2.5	0.5	1	-3	0.25	-2.5	-2.25	2.5	-0.5			22.28	-0.75	-0.25	1.25	-1.5	2.25	-1.5	-0.5	2	0
	22.32	-0.5	1	-1	-1.5	0.25	-1.75	-2	1.75	0.5			22.32	1.5	0	-0.25	0	2.5	-0.5	-1	2.75	-2.5
	22.36	0.25	0.5	-1.75	-1	-1	-1	-2.25	-1	0			22.36	2.25	0.25	-1.25	0	1.25	0.75	-1.5	0.5	-3
	22.4	-1.25	-0.25	-2.5	-0.75	-2	-1.25	-2.25	-2	-1			22.4	0.5	1	-0.75	-1.25	0.25	0.75	-1.25	-1.25	-1.25
	22.44	-2	1	-2.25	-0.25	-0.75	-0.5	-2.25	-2	-0.5			22.44	-1.75	1.5	-0.5	-1.25	1.25	0.25	-0.75	-3	0
	22.48	-2	0.5	-1.25	0.25	0.25	0.75	-2.25	-1.5	0.75			22.48	-1.75	1.25	0.25	1.5	1.75	0.25	-0.25	-4	1
	22.52	-2.25	-1.25	-0.25	0	0.5	1	-1.75	0	1.25			22.52	-1	0	0.75	1.25	1	0.25	0	-1.5	1.5
	22.56	-0.5	-1.75	-0.25	-0.25	0.25	-0.25	0	-0.25	-1.5			22.56	1	-1.75	1.5	0.25	-0.25	-0.5	0.5	0.25	1
	22.6	0.5	-2.5	0	-0.25	0.5	-0.5	0.25	1	-1.5			22.6	0.25	-2.5	2.75	0.25	0.25	-0.5	0.25	1	1.5
	22.64	0.75	-2.5	0.75	-1	0.5	0	0.5	2.5	-0.5			22.64	0.5	-1.75	1.25	0	1	0.75	1	1.25	0.5
	22.68	1	-2.25	0.75	-2	0.25	0.5	-0.75	1.25	-2.5			22.68	1.25	-2	-1	-0.75	0.5	2	0.5	1.5	-1.75
	22.72	1.5	-1.75	0.25	-3	0.75	-0.75	-1.25	-2.25	-2.75			22.72	0.75	-1.25	-1.5	1	-0.75	1	2.25	0.25	-2
	22.76	0	1.25	-1	-1.25	0.25	-2.25	-0.5	-2.75	-1			22.76	-1.5	1.75	-1.25	3.5	-0.5	-1	2.75	0.25	-1
	22.8	-2.5	1.25	-1	1.25	-0.5	-1.25	0.75	-1.5	0.25			22.8	-3.75	2	-0.25	3.75	-0.5	-1	2.25	0	-0.25
	22.84	-2.25	-1.25	-0.75	0.75	0	-0.25	0	-2	0.25			22.84	-1.75	0.25	-0.75	1.5	0	-0.5	0.25	-2	0.25
	22.88	1	-2	-1	-0.25	1.5	-0.75	0	-0.5	0			22.88	0.75	-0.5	-0.75	-0.5	1.75	-0.75	-1.75	-1.5	0
	22.92	1.5	-1.25	-0.5	-2.5	1.5	-1.5	-0.25	1.75	-1			22.92	2	-0.5	0.25	-2.5	2.25	-1.5	-0.75	0	0
	22.96	-0.5	-1.75	-0.75	-3.75	-0.25	-2	-1	2	-1.25			22.96	0.5	-0.75	-0.5	-3.25	0.5	-2	-1	2	-0.25
	23	-2.5	-2	-1	-3.25	-1.25	-2	-0.75	0	1.25			23	-0.25	-0.5	-1.25	-0.5	-0.25	-2.25	-0.25	1	0.75
	23.04	-2.25	-2	-1.75	-2	-0.75	-1.75	-1.75	0	2.25			23.04	0.25	0	-1.25	1.25	0	-1.75	-1	0	0.75
	23.08	-1.25	0.25	-0.5	-1.75	0	-0.5	-1.5	0.5	0.75			23.08	1	1	0.25	0.75	0	-0.5	-1.5	0.5	-1
	23.12	1	1	0.75	-1.75	0.25	1	-1	-0.25	-1.25			23.12	2.25	1.25	1.75	-0.5	0	0.5	-0.25	0.5	-2.25
	23.16	1.25	1.5	0.25	-2.25	-0.5	0.75	-1	-2.5	-2			23.16	2.75	2	2.25	-2	-1.5	1.75	0.75	-0.5	-1.25
	23.2	-0.5	-0.25	-1.5	-2	-1	-1	-1.75	-3.75	-1.25			23.2	1.75	0.75	1.25	-2.5	-1.75	0	0.5	-1.75	1
	23.24	-1.5	-3	-1.25	-2	-1.5	-1.5	-1.75	-2.5	-0.5			23.24	0.25	-0.5	0.25	-2.25	-0.5	-1.25	-0.25	-1.25	1.25
	23.28	-1	-3	0.75	-1	-1.75	-1	-0.5	-0.5	0.5			23.28	-0.25	-0.75	0.75	-2.5	0	-1.75	0.25	-0.5	1.75
	23.32	-0.5	-1.75	0.75	1	0	0.25	-0.25	-0.25	0.25			23.32	-1	0.25	0.5	-1	0.75	0.25	1.5	0.5	0.75
	23.36	0.5	-1.25	-0.5	2	0.5	-0.25	0.25	0.25	0.5			23.36	-1	0.25	-0.5	0.75	0.5	2.5	2	1.25	0.75
	23.4	1.75	-1.25	-0.5	2	2	-2	0.5	-0.25	1			23.4	-0.75	0.25	-0.5	1	1.5	1.5	0.75	0.75	0
	23.44	1	-0.25	0.75	1	1.75	-2.5	-0.25	-1.5	1.25			23.44	-1	0	0.5	0.75	0.75	-0.25	-1	0.25	0.25
	23.48	-0.5	0.25	1.25	-0.5	-0.75	-2.25	0.25	-3	0.75			23.48	-0.5	-0.5	0.75	0.5	-1.5	-2.75	-0.75	-2	-0.25
	23.52	-1.25	1.75	0.5	-0.5	-2.25	-2.25	-0.25	-3.25	0.75			23.52	0.5	0.75	1	1.75	-2	-3.5	-0.75	-2.75	-0.5
	23.56	-0.75	2	0	0	-1	-1	-0.25	-1.25	0.5			23.56	1	1	0.25	2.25	0.25	-1.5	-0.75	-1.5	-0.5
	23.6	-0.25	-0.5	0.75	-1.5	-1.5	-0.75	-0.5	0	-0.75			23.6	1	-0.75	-0.5	1.5	1	-0.75	-1.5	0.25	-0.25
	23.64	0.5	-1.5	-0.5	-1.5	-1	-0.5	-0.75	0.5	-2.25			23.64	0	-2.5	-1	1	1.25	1.25	-2.5	0.25	-1
	23.68	-0.75	-0.25	-1.5	-0.5	-0.5	0	-1.25	0.75	-3.5			23.68	-0.25	-1	0	1.5	0.75	1.25	-1.25	0.75	-1.25
	23.72	-1.75	-0.25	-1.5	0.5	-0.5	0.5	-2	-0.5	-2.75			23.72	0.25	1	-0.75	1.75	0.25	0.25	-1.25	0.75	-0.5
	23.76	-1.75	-0.5	-1.75	-0.25	0.75	0	-1.5	-0.25	-1.75			23.76	0.5	2.5	-1.5	0.25	0	0	-1.5	0.5	-0.75
	23.8	-2.25	-1	-2.5	-1	-1.25	-1	-1.25	-0.75	-1			23.8	-1	2	-2.25	-0.5	-1.25	-1	-0.75	0	-0.25
	23.84	-1	-2	-2.5	-0.5	-3	-0.75	-1	-1.5	-1			23.84	-0.5	0.5	-2.5	0.5	-1.5	0.25	0.5	-0.25	0.5
	23.88	0.5	-1.5	-2.75	-0.25	-1.5	-1	0	1	-0.75			23.88	-1	0.25	-1.75	1.5	-1.5	0.75	0.75	1	1.75
	23.92	-1	-0.5	-1	-2.25	-0.5	-1.25	-0.25	2.25	1.25			23.92	-1.25	0.25	0.25	0.75	-1	0	1.25	1.25	2
	23.96	-0.5	0.75	1	-2.25	-1	0.25	-2	1	1.5			23.96	0.5	0.75	2	-0.25	-1.5	-0.5	1.25	1.25	0.5
	24	1	0.25	0.75	-0.5	-0.5	1.5	-1.5	0.5	2.25			24	0.75	-0.5	1.5	0.25	-1	-0.25	0.5	1.75	1
	24.04	1.25	0	0.5	-0.25	0.25	-0.5	-1	2	2.25			24.04	-0.25	-1	1	-0.5	-0.5	-0.5	0.25	2.75	1.75
	24.08	-0.25	0.75	-0.25	-1.75	0	-1.5	-1	1	0.75			24.08	-0.25	-0.75	-1	-1	0	-0.25	0	1.25	1.25
	24.12	-1.75	1	-1.5	-2.25	0.75	-1.5	0.75	-0.5	-2.25			24.12	0.25	1	-3	-1	1	-0.25	0	0	-1.75
	24.16	-2	0	0.75	-0.5	1	-2.25	2.5	-1.25	-2			24.16	0	2	-1.5	-0.5	0.75	-0.25	1.25	-1.25	-2.25
	24.2	-0.75	-1	0.5	-1.25	0.75	-2.75	2	-0.75	-0.75			24.2	-0.5	2.25	1.25	-1	1.75	-1.5	0.75	-1.75	-0.5
	24.24	0.75	-1.75	-0.5	-1.5	0	-0.75	1.25	0	0			24.24	0	0.75	2	-1	2.25	-1	1	-1.5	2
	24.28	0.75	-1.5	-1.5	-0.5	-0.75	1.25	1	0.25	0.5			24.28	0.5	-0.5	1.75	0.25	0	0	0.5	-1	1.25
	24.32	0.75	0	-1.75	1.25	-0.5	2	0.5	0.75	-0.25			24.32	0.25	-1.25	0	1.75	-0.5	1	-0.5	0.25	-1.75
	24.36	1.25	0.5	-0.75	1.75	-0.25	2.5	-1.25	0	-0.75			24.36	1	-1.5	-2.25	0.75	0.5	1.75	-2.5	0	-3.25
	24.4	0	-1.75	0.25	1.25	-0.25	1.5	-1	-0.75	0			24.4	0.75	-1.25	-1.75	-1.5	-0.5	-0.75	-2.25	-0.5	-2.5
	24.44	-1.5	-2.5	0.25	1	-1	0	0	0.25	-0.25			24.44	0.5	-0.25	0.5	-2	-1.5	-2.5	-0.5	1.5	-0.75
	24.48	-1.75	-1.25	0.5	0.75	-0.25	-1.25	-0.75	1	0.75			24.48	0	0.5	1.25	-1	-1	-1.5	1	1.75	0.25
	24.52	-1	0	0.25	-1	-0.5	-1.75	-0.75	-1	1			24.52	0.5	0.5	0.5	-1.75	-0.75	0.75	1.25	0	-0.25
	24.56	0.25	0.25	0	-2	0.5	-0.25	0	-2.25	0.25			24.56	0.5	0.5	0	-1	0.25	2.25	1.25	-0.25	-0.25
	24.6	0.75	1	0	-2	1.75	-1	-0.25	-2.25	-0.75			24.6	0	0.75	-1	1	1	2	1	-0.75	0
	24.64	-0.75	0.75	-0.5	-1	1	-1.75	0	-2.75	0.75			24.64	-2	0.75	-0.75	1	-0.25	1	1.5	-2.25	1.25
	24.68	-0.5	0.75	-0.75	-0.25	1	-0.5	-1.25	-3	2.5			24.68	-2.25	0.5	0	0.25	0.5	0.5	0	-2.5	2
	24.72	1.25	1.75	-0.75	-0.25	2.25	1	-2.5	-0.5	1.75			24.72	-0.25	1.25	0.5	0.5	2.5	2	-1.25	-1	2
	24.76	1.25	1.75	0.5	-1	2.5	0.5	-2.25	1.25	0.5			24.76	1.5	0.5	2.25	0	2.5	1.25	-1	0.5	1.75
	24.8	3	1.25	-0.5	-1	0.5	-0.25	-1.5	1.5	-0.5			24.8	3	-0.75	1.5	0	0.25	-0.75	-0.75	2	1.5
	24.84	2.75	-0.5	-1	-0.5	-1.25	-1.25	-0.25	0.5	-0.5			24.84	4	-1	-0.25	-0.25	-0.75	-0.75	0	1.75	0.5
	24.88	1.25	-1.75	-1	-1	-2	-3	-1.25	-0.25	-0.75			24.88	3.5	-1	-0.5	-0.75	-0.5	-1.25	0.75	0.5	0.75
	24.92	-0.75	-1.5	0	-1.5	-0.75	-3.5	-0.5	0.75	0.25			24.92	1	0.25	0	-1.5	1	-2.5	-0.25	-0.25	0.5
	24.96	-1.5	0	1.25	-0.5	0	-3	0	2	-1.25			24.96	-0.75	1.5	0.25	-0.25	0.25	-3	-0.25	0.5	-1.25
	25	-0.75	0	1.5	1	-0.25	-1.25	0.5	2.5	-1.75			25	-0.5	0.75	0.25	1.25	-1.5	-0.75	-0.25	1.75	0
	25.04	0	-1.5	0.75	1	-1.5	-0.75	2	3.5	-2.5			25.04	-1	-0.75	-0.5	1.5	-3.75	-0.25	0	2.25	1
	25.08	0.5	-1.75	0.75	0.5	-1.25	1.25	2	1.75	-2.25			25.08	-0.25	-0.25	0	0	-3	0.5	1	1.75	0.75
	25.12	0.5	-0.5	0.25	0.25	-0.25	2	0.75	-0.5	0			25.12	0.25	1.25	0.5	-0.5	-0.5	0	1.5	1.75	1
	25.16	0.5	0.25	0.5	-1.5	0.5	0.75	-1	0	1.5			25.16	-1	1	1.5	-0.25	1.75	-1.5	0.75	2	1
	25.2	-0.5	1.25	0.5	-1.75	0.25	0	-0.25	1.25	0.25			25.2	-2.25	1.25	2.25	-0.25	2.75	-1.25	0.5	2	0
	25.24	0	1.25	1	-1.25	1	-0.5	0	1.75	-0.75			25.24	-0.25	0.5	1.5	-0.25	3	-1.25	1.25	0.25	-1.5
	25.28	-0.5	0.5	1.25	-1	0	0	-0.5	0.25	-0.75			25.28	1	-0.25	0.25	0	1.5	-0.75	1.25	-0.5	-1.5
	25.32	-1	-0.75	0.5	-0.75	-0.5	0	-0.5	-1.5	1.25			25.32	0.25	-1	-0.25	1.25	0.75	0.5	0.25	-0.5	-0.5
	25.36	-1.75	-0.5	-1.75	0.5	0	-0.75	-0.5	-1.75	1.25			25.36	-1	-1	-1.5	1.75	0.5	0.25	-1	-1	-1
	25.4	-1.25	-1.25	-3	1	-0.75	-0.5	-0.25	-1.75	0.25			25.4	1	-1.25	-1.25	1	-0.5	1.25	-2	-2	-0.75
	25.44	-1.75	-1.5	-2.25	-0.25	-2.5	0.25	-1.75	-0.75	-1.25			25.44	1.25	-1.5	-0.5	-0.75	0	1.25	-2.75	-1.25	-1.5
	25.48	-1	-0.5	-0.75	-1.75	-1.5	0.75	-2.75	0	-1			25.48	0	-1	-0.25	-1.5	0.75	1.25	-1.75	-0.25	-2.25
	25.52	0.75	0.25	0.5	-3	0.5	-0.25	-3	0.75	-1.5			25.52	0	-0.75	0.25	-1.25	0.75	-0.25	-0.75	-0.5	-3
	25.56	1	0.75	0.5	-2.5	0.75	-0.5	-1.75	1	-1.75			25.56	0.25	-0.5	1.25	-0.75	-0.25	-0.25	-0.5	-0.25	-2.75
	25.6	0.25	1	0	-0.75	0	-1.5	0.75	2.25	-1.25			25.6	0.75	1	1	-0.5	-0.5	0.25	0.5	0.5	-1.5
	25.64	-0.5	0.75	-1	1.5	-0.25	-1.75	3	0.5	1			25.64	-0.5	2.75	0	0.75	-0.5	0.5	0.5	0.25	0.5
	25.68	-0.75	0.75	-2	2.5	1	0.25	3.5	-0.25	1.75			25.68	-1.75	2.5	-1.25	3	0	0.25	-0.75	0.25	0.25
	25.72	0	-0.5	-1.25	0.5	0.75	1.5	1.75	-0.25	1.25			25.72	-2	0.75	-0.75	3.5	0.25	-0.25	-0.5	-0.25	0.75
	25.76	1.25	-2.5	-0.25	-2	0.5	1.5	0	-0.25	1			25.76	-0.5	-1.25	1.5	2.5	0.75	1.5	2	-1.5	0.5
	25.8	0.25	-1	0.25	-1.75	0.75	1.25	0.5	-0.25	-1.5			25.8	0.25	0.25	1.25	2.5	0.75	1.25	2.75	-2	-0.25
	25.84	-1.25	-0.25	-0.5	0.25	-0.25	0	1	0.25	-0.5			25.84	0	1	-0.5	1.25	0	-0.25	1.5	-1.25	1.5
	25.88	-0.75	0.75	-0.75	1.25	-1.5	-2.5	0.5	-0.5	1			25.88	1.25	1.75	-0.25	1.25	0	-2	0.75	-1.25	3.5
	25.92	-1	0.75	-0.25	-0.25	-1.25	-2.25	0.5	-0.75	1			25.92	2.5	1	0.75	0.25	-1.25	-1.5	-0.25	1.25	2.25
	25.96	-0.75	-0.5	0.25	-2.5	1	-2.25	-1	0	0			25.96	3.5	-0.5	0.75	-1.75	-0.5	-1.75	-1.25	2.25	1.25
	26	-0.25	-0.75	0.75	-1.25	1	-2.75	-2.5	0.5	-1.75			26	2.5	-1.5	0.75	-1.25	-0.5	-1.75	-2	1.5	-0.25
	26.04	1.75	-2	0.5	0.5	0.5	-2.75	-2.5	0	-1			26.04	1.25	-1.75	-0.25	1	-0.75	-2	-1.75	0.75	-1.75
	26.08	1.25	-3	1	1.5	0.5	-1.25	-0.75	-1.5	0			26.08	0.75	-1.5	-1.25	1.5	-0.75	-0.75	0	0.25	-2
	26.12	0.75	-2.25	1.5	0.75	-0.5	1.25	0.75	-2	0.75			26.12	0.75	0.75	0	0.25	-0.75	0.75	0.75	0.25	-1
	26.16	0.75	-0.5	0.25	-0.25	-1.25	3	1	-0.75	2.5			26.16	0	0.75	-0.5	1.25	-0.25	0	0.25	0	0
	26.2	2	-0.25	-1.75	-1	-0.5	2.5	0.75	0.5	1.25			26.2	0.75	-0.5	-3.5	-0.25	0.25	-1.5	0	-1	-1.5
	26.24	1.25	-0.5	-1	-0.5	0.25	2.25	-0.5	1.25	-0.75			26.24	0.5	-1.25	-3	-0.5	0.25	-1.5	0.5	-1.25	-2.25
	26.28	-0.25	-0.5	-0.75	-1.25	0.75	1.5	-1.75	0.25	-1			26.28	-0.25	-0.75	-1	-1	1	-1	1.5	-1.75	-2
	26.32	-0.5	-0.75	0.25	-3	0	1	-1	0	0.5			26.32	1	0.5	0	-1	1.25	0.75	2	0	0
	26.36	0.25	-0.75	1	-2.75	-2	0.75	-0.75	0.5	1.75			26.36	2.25	1	0	-1.5	1	3	0.25	1.75	0.5
	26.4	0.25	-1.25	0.5	-0.5	-2	-0.75	0	-1	0.5			26.4	0.5	0.5	0.5	-1.5	-0.25	2.25	0.5	1.25	-0.5
	26.44	-0.5	-0.5	0.25	0.25	-2	-1.25	0.5	-2	-0.25			26.44	-1.75	0.25	1.25	-0.25	-2.75	1.25	0.5	-0.25	0
	26.48	1.5	-1.25	-0.25	-0.25	-0.75	-1.25	1.25	-1	0.25			26.48	-1.75	-0.25	1.5	0	-3	0.25	1.75	-0.75	1.5
	26.52	1.5	-1.5	-0.75	-0.25	-0.5	-2	0	-0.5	-0.25			26.52	-1	-1.25	0	0.5	-1.25	-1	0.5	-0.5	1
	26.56	-1	-0.75	-1.25	0.75	0.25	-2.25	-0.25	0.5	-0.75			26.56	-0.5	-1	-1.25	0.5	-0.5	-1.5	-1	-1.25	-0.25
	26.6	-3.25	0.25	-2	0.75	0.75	-1	-1.25	0.75	0			26.6	-1.75	0.75	-2.75	-0.25	0	-1	-0.25	-1.5	-0.5
	26.64	-3	0.5	-1.25	1.75	-0.25	0.25	0.25	0.5	-1			26.64	-2.25	1.75	-1.25	0.5	-0.25	0.5	1	-0.75	-0.25
	26.68	-1.25	1	-0.75	2.5	0.75	-0.25	1	0.25	-0.5			26.68	-0.5	2	0.25	1.5	0.25	0.25	0.75	-0.25	0
	26.72	0.25	1.75	1	1	1.25	0.5	0.5	0	1.5			26.72	1.25	0.75	1.5	1.25	2	1.25	-0.5	0.5	-0.25
	26.76	2.25	1.25	1.25	-2	-0.75	0.5	0.75	-0.75	2			26.76	1.5	-0.75	1.75	0	2	-0.25	-1	1	0.75
	26.8	2.5	-0.5	0.5	-2.75	-0.5	-0.25	0.25	-1.75	0.75			26.8	2.75	-1.5	0.25	-0.5	1	-0.75	-0.75	0	0.5
	26.84	1.5	-2.5	1.25	-2	0	-0.25	0	-1	-0.25			26.84	2.25	-2.25	0.25	0	0	0	-0.5	-0.25	0.75
	26.88	0	-3.25	1.5	-0.75	-0.5	-0.25	0.5	0.25	0.75			26.88	0.5	-1.5	1.75	0.25	-2.25	-0.5	0.75	0	2
	26.92	-1	-2.5	0.5	-0.5	0.25	-1.5	1.5	-0.5	0.75			26.92	-0.75	0.75	1	-0.25	-1.5	-1.75	1.25	0	1
	26.96	-1.25	-1	0	0	1.25	-0.25	1.75	0	0.5			26.96	-0.25	0.75	-0.25	0	0	-0.75	0.75	-0.75	0
	27	-0.5	1	-0.75	1	2.75	2	1	1.25	1.25			27	0	0.5	-1	1.25	0.5	1	0.5	-0.5	0.75
	27.04	-1	1.75	-1.75	-0.5	2.5	1.25	-1.75	1.5	1.5			27.04	0.25	0.5	-1	-0.5	1.25	1	-0.75	-0.25	2
	27.08	-0.25	0	-1.25	-2	1.5	-0.25	-3.25	0.75	0			27.08	1.25	0.75	0.75	-1.5	1	0.5	-1.5	0	1.75
	27.12	1.5	-1	-0.5	-2.25	-0.25	-0.5	-1.5	1.5	-1			27.12	0	-0.25	1.25	-1.25	0.5	-0.75	-1.5	1.75	0
	27.16	3	-1.75	0	-1.75	1	-2.25	1	1	-0.75			27.16	-0.25	-2	0.75	0	1	-2.75	1.5	1	0.25
	27.2	1.75	-1.75	0.25	-0.5	0.75	-2.25	0.75	-0.75	-1.25			27.2	0.25	-0.75	0	1.5	0.25	-1.25	2.25	-0.25	-0.5
	27.24	0	-1	0.75	1.75	-0.5	-0.25	0.25	-1.25	-1.25			27.24	2	0.5	0.75	3	-0.5	1.75	0.5	-0.5	-1.25
	27.28	-0.75	1.75	1.5	2	-1.5	2.25	0.25	0	-0.25			27.28	0.75	2.5	2.5	2.75	-1	3	-2	0.25	-1.25
	27.32	0.25	2.25	1.75	0.5	-1.25	3	0.75	0	1			27.32	-1	2.75	3	0	-0.75	2.5	-2	-0.75	-1.75
	27.36	1.25	0.5	1.25	-0.5	-1.5	1.75	0.5	-0.25	1.25			27.36	-1	1.5	2.5	-0.75	-1.75	0.5	0	-1.25	-1.75
	27.4	-0.25	0.5	0.25	-0.25	-1.5	-1.25	0	-2	0.75			27.4	-1.25	1	0.75	-1	-1	-0.5	-0.25	-2.25	-0.25
	27.44	-0.75	0	-0.5	0.75	-0.75	-3.5	-0.75	-4.5	1.75			27.44	-0.75	-0.5	-0.5	0.25	-0.25	-0.5	-0.25	-2.75	2.75
	27.48	-1	-1.25	0.5	0.25	0.25	-2.5	-1	-2	1.25			27.48	-1.25	-2	-1.25	0.25	0.25	-0.5	-0.25	-1.25	2
	27.52	-2.5	-2.5	1	-0.5	0.75	-0.25	-1.5	1.5	1.25			27.52	-2.25	-3.5	-0.5	-0.25	-0.75	-1	-0.75	-0.5	0.75
	27.56	-2.25	-3.25	0.5	-0.5	0.75	2	-1.5	2.25	1.75			27.56	-2.75	-2.75	-0.5	0.75	1	0	-0.25	-0.25	-0.25
	27.6	0.25	-1.75	-1	-0.25	1.75	2	-1.25	1.5	0			27.6	-0.75	-0.75	-1	0.75	3.5	1.75	-0.5	0.75	-0.5
	27.64	0.75	-0.5	-1.5	0	2.25	1	-1.25	1.25	0			27.64	0.75	-0.5	-2	-0.5	3.25	0.5	0.25	0.75	0.25
	27.68	0.25	-0.25	-1	-1.75	2.25	-0.75	-0.75	1.25	-0.75			27.68	0.25	0.25	-2.25	-2.25	1.25	-1.25	1.25	1	0.5
	27.72	-1	-0.75	-0.25	-2.5	1.5	-2.75	-0.75	1.75	-1.25			27.72	-1.75	0	-0.5	-1.25	-1.5	-2.5	1.25	0.5	1.25
	27.76	-0.5	0	1.5	-2.25	0.5	-1.25	-0.25	1.5	-1.5			27.76	-1.75	-2	1	-0.75	-2.25	-1.5	0.75	0.25	1.25
	27.8	1.25	2	2.25	-1.25	0	0	0.75	0.5	-0.25			27.8	0	-2.25	0.75	0	-1.5	-0.75	1	-0.25	-0.5
	27.84	2.5	2.5	0.5	0	0.25	0	-0.25	0	0			27.84	1.5	0.25	-0.5	0.25	-0.25	-0.25	-1	0.25	-3
	27.88	1.5	2.5	-1.25	-0.25	-1.5	-0.75	0	-0.25	-0.25			27.88	0.5	2.75	-2	-0.75	0	-0.25	-0.75	-0.25	-3.75
	27.92	-0.75	2.25	-0.5	-0.75	-2	-0.75	3.5	-0.25	0.25			27.92	-0.25	3	-0.75	-2.5	-0.25	-0.25	1.5	0.25	-2.25
	27.96	-1.25	1.5	0.25	0	-1.75	-1.25	2.75	0.75	0.5			27.96	0.5	2.25	0.5	-1.5	-0.5	-1.25	1.25	1	-1.25
	28	-1	-0.25	0.75	1.25	-1.5	-1.5	0	1	0.5			28	1.5	0.75	1.25	1	-0.25	-1.5	0	1.75	-1.25
	28.04	-1.5	-0.25	1.25	1.5	-2	-1.75	-1.75	0.5	-0.75			28.04	1.5	0	2	2	0	-1.75	-1.75	1	-2
	28.08	-0.75	1	-0.5	1	-1	-2.5	-3	1.25	-1.25			28.08	1.25	0.5	0	2.75	0.75	-3.25	-2	-0.75	-0.5
	28.12	0.5	1.5	0	-1.25	0	-0.5	-2	0	-1.75			28.12	1.25	0.5	-1	1.25	0.75	-0.5	-0.25	-3	-0.5
	28.16	0	0	0.75	-2.75	0.25	2	-1.5	-2.25	-1.5			28.16	0	-0.75	0	-0.5	0.25	2.25	1	-3.5	-0.25
	28.2	0	-0.75	-0.75	-0.25	0.5	1.5	-1.75	-2.5	1			28.2	-1	-1.25	0.5	0.5	-0.25	3.25	0	-3.25	1.25
	28.24	-0.75	-0.75	0.25	1.5	1	1.25	0.25	-0.75	2.25			28.24	-2.5	-1	0.25	1	1	1.75	-0.75	-2.5	1.5
	28.28	0.25	-0.75	-0.25	0.75	1.25	1.5	1.75	0.5	2.5			28.28	-1.25	0.5	0.5	1.25	1.25	1	-1.25	-0.5	1
	28.32	1.75	-0.25	-0.5	-2.25	1.5	0.5	0.25	1.25	1.75			28.32	1.5	1.75	0.75	-0.5	1.25	0.5	-1.5	2	0.75
	28.36	0.75	-0.5	-1	-2.5	2.75	-0.5	-0.25	0.75	1.75			28.36	2.5	0.75	-0.25	-0.5	2.75	0.5	-1.5	3	1.5
	28.4	-1.25	0.25	-0.75	0.25	3.25	0.25	-0.25	0	1.5			28.4	0.5	-0.25	-1.5	1.25	3.25	0.5	-1.75	3.25	3.25
	28.44	-1.5	0.5	1	1.75	2.5	0.25	-1.25	0.5	1.75			28.44	-1.5	-1.25	-2	1.25	2.25	0	-2.25	1.75	2.75
	28.48	-1	1	0.25	1.75	2	-0.75	-2	1	2			28.48	-2.75	-1.5	-1.75	0.5	1	-1	-0.5	0	1.5
	28.52	0.25	1.5	0	0	0.75	-0.5	-2.25	0.25	1.25			28.52	-2	0.75	-1.75	-0.5	0.25	-2.25	-0.5	-1	0
	28.56	3	1.25	0	0	-1.75	0.5	-0.25	0.5	1.25			28.56	0.25	1.5	-0.5	0	-0.25	-2	1	-0.25	-0.75
	28.6	2.25	0	0	-0.75	-2.75	0.25	1.25	1.25	1			28.6	-0.5	0.75	-0.75	-1.5	-0.5	-1.75	2.75	0	-1.25
	28.64	-0.25	0	0	-1.5	-2.5	1	1.25	0.75	-1.25			28.64	-0.75	0	-1.5	-2.5	-1.5	-1	3.5	-2	-2.5
	28.68	-1.5	-0.75	0	-2	-2.25	1.5	0.75	0.5	-1.5			28.68	0	-0.5	-2.25	-2.25	-3.5	0.5	3.25	-1.75	-2.5
	28.72	-0.25	-0.25	0	-1	-0.5	-0.25	1	0.5	-1			28.72	1.75	0.75	-1.25	-1.25	-3	-0.5	3	-1	-2
	28.76	1.75	-0.75	0.25	-1.75	-0.25	-1.5	2	0.25	0			28.76	2.75	-0.5	-0.25	-1.5	-1	-1.5	2.75	-0.25	-1
	28.8	1.75	-0.75	2.5	-2.5	-0.75	-0.75	1.5	1.5	-0.25			28.8	1.75	-2.75	1.25	-1.5	0.25	-1.25	0.75	2	-0.5
	28.84	0.25	0.25	1.75	-0.75	-0.5	0.5	1	1.25	-1.25			28.84	0.25	-1.25	1.75	0	-1	-1.5	-1.5	1.5	-1.25
	28.88	0.5	1	-1.25	1	1.75	1	0.5	0.75	-0.75			28.88	0.5	1.5	0.5	2	-1.25	-0.75	-2.5	1.25	-1.75
	28.92	1	0.5	-0.75	1.25	3	1.25	-0.25	0.25	0			28.92	0	2.5	1.25	2.75	0.25	-0.25	-2.5	0.25	0
	28.96	0.75	-0.75	0.75	0	2.75	1.75	-0.75	-0.25	0.5			28.96	-1	0.25	2.25	0.75	2	-0.25	-2	-0.75	1
	29	0.25	-2.5	1.5	0.5	1.75	1.5	-1.5	-0.25	0.75			29	-0.25	-2.5	3	0.25	1.25	0.5	-3	0.25	0
	29.04	0.75	-1	1	0.5	1.5	-0.25	-1.5	0.25	-0.5			29.04	1.25	-2.5	3.25	0.75	0.5	0.5	-2.75	1.25	-1.25
	29.08	2	-0.75	1	1	0.25	-1.5	-0.25	1	-0.25			29.08	2	-2.25	2	0.75	0	-0.5	0	0.25	0
	29.12	1.75	0.5	0.5	1.25	0	-1.25	0	0	1			29.12	1	-0.5	0	-0.25	0.75	-0.25	0.75	-1.5	2
	29.16	-1	0.5	-0.5	1	-0.5	-1.25	0.5	-0.75	1			29.16	0.25	0.25	-1.75	-0.5	-0.75	-0.25	0.75	-2	2
	29.2	-1.75	0.5	0.75	0.25	-0.25	-1.25	-0.25	-0.75	0			29.2	-0.25	0.75	0.25	-0.5	-1.75	-0.5	0	-0.5	1.5
	29.24	-1	0.5	1	-0.5	1.25	-0.75	-0.5	-0.75	0.25			29.24	0.5	1.25	1.5	0.25	-1	1	1	-0.25	0.25
	29.28	-0.5	0	0.5	-2	2	-1.25	-0.5	-0.5	1.75			29.28	1.25	0.75	-0.5	0.5	1.5	0	1.5	-1	-1
	29.32	1	0.25	-0.75	-2.5	0.75	-1	0.75	0.25	1.25			29.32	1.5	0	-2	0.25	2.75	-0.75	0.5	-0.75	-1.25
	29.36	2	1.25	-0.75	-2	1.25	-1.25	0.5	0.25	0.25			29.36	0.25	0.5	-1.5	0.75	1.5	-1.25	-0.5	-1.75	0
	29.4	1.75	2.25	-0.25	-0.25	2.75	-1.25	-0.25	0.25	0.75			29.4	-0.5	0.75	-0.75	0.75	0.5	-1.5	-0.25	-0.75	0.25
	29.44	2.5	0.75	1.25	1	1	-0.75	0.75	2	-0.75			29.44	1.5	0.25	0.75	0.25	0.75	-0.75	0.75	1.75	-0.25
	29.48	2	-1	1	1.5	0	-0.25	2.75	2	0.5			29.48	1.75	-0.5	0.5	0	1.75	-0.5	2	1.5	0.75
	29.52	0.5	-2	0	1	-1	0	3.75	1	2.25			29.52	0.75	0	-1.5	-1.5	1.25	-0.75	1.5	1.5	2
	29.56	0.5	0.25	0	0.75	-1.5	1	2.25	-0.5	2			29.56	0.5	1.75	-1	-0.75	-0.5	-0.25	1.25	0.75	1.5
	29.6	0.25	2	1	1.5	-0.75	1.75	1	-0.75	1			29.6	-0.75	1	1.25	0	-0.75	1	1.25	1.5	0.75
	29.64	0	1.5	2.25	0.5	1	1	0	0	-0.25			29.64	-0.75	1	2.25	-0.5	0	1.25	-0.5	1.25	0
	29.68	0.75	0.75	3	0.5	2.5	1.25	0.5	1	-1			29.68	-0.5	1.25	3	0.5	0.25	1	-0.25	1	0
	29.72	1	0	1.75	0	2	1.5	1.5	2.25	-1.25			29.72	-1.25	1	2.75	0.5	-0.25	1.5	1.5	1.5	-0.25
	29.76	1.5	-0.25	1.25	-1.25	0	2	2	2	0			29.76	0	-1	3.25	-0.25	-1	1.5	2	0.75	1
	29.8	1.5	0	0.75	-0.75	-1.25	1.75	2	0	1.5			29.8	1	-1.75	3.75	-0.5	-0.5	-0.5	0.25	-0.75	0.5
	29.84	1.25	-0.25	-0.25	-1.25	-1	1.75	2.25	-1	1.75			29.84	1	-0.25	1.25	0	1	-2	0.5	-1.5	-1
	29.88	1.75	1.25	-0.75	-1	0	2	1.75	-1.75	0.75			29.88	0.5	1.5	0.25	0	0.75	-0.25	0.75	-2.5	-1.5
	29.92	1.5	2	-0.25	0.25	-1.5	0	0.5	-1.75	1.25			29.92	0.25	1.75	0.25	0.25	-1.75	0.5	0.5	-1.75	0.5
	29.96	0.5	2.25	0	0.5	-2	-2.25	-0.25	-1	1.5			29.96	-0.25	1.5	-1.25	1.25	-2.5	0.25	0	0.25	0.75
	30	-0.25	2.75	1.25	1.25	-0.5	-1	-1.25	-0.25	1.75			30	-1	1.75	-2.25	2	-1.25	0.75	-1.25	1.25	0.75
	30.04	0.25	2.75	1	0.75	0.5	0.25	-2.25	0.25	0.75			30.04	-0.25	2	-2.25	2.25	0.25	0.25	-2.25	0.25	0.75
	30.08	0	0.5	0.75	-0.75	1	0.25	-1.5	0	0			30.08	0.25	-1	-0.75	0.75	1.75	1	-0.75	-2.25	0
	30.12	1.25	-0.75	1	-0.75	1.5	-1	-1	0.75	-1			30.12	0	-3.75	0.75	-2	2.75	1.75	0.25	-1.5	0.25
	30.16	0.75	-0.75	2	-1.5	1.75	-1.75	-1.5	2	-1.5			30.16	-0.5	-3.25	1.75	-1.75	3	-1.25	-0.5	-0.25	0.5
	30.2	0.5	-1.25	2.75	-2	0	-1.25	-0.5	1.25	-1			30.2	0.5	-0.5	1.5	0	0.5	-3.25	-1.25	-0.5	0.5
	30.24	0.25	-1.25	1.5	-1.75	0.75	0.25	0.75	1	-0.5			30.24	1	1	0	0.25	-0.5	-1.75	-0.25	0.25	-0.75
	30.28	1	1.25	-0.25	0	3	2.5	2.5	2.5	0			30.28	1.25	3.25	-2.25	0	0.5	1	1.75	2	-1.25
	30.32	1.75	2.75	-0.75	0.75	2	2	2.5	3.5	-0.75			30.32	0.75	2.5	-3	-0.25	1.75	0.25	1.25	3.25	-0.75
	30.36	0.75	0.5	0	0	0.75	0	2.5	3	-0.75			30.36	1	0	-1.5	-1.25	1	-0.25	1.5	2	-1.75
	30.4	0.25	-1	-1.75	0.75	-0.25	0.75	2	0.25	-1			30.4	1.5	-1	-0.75	-0.25	-1.75	0.25	0.75	0.25	-2.75
	30.44	0.5	-0.75	-1.5	1.5	0.5	1.5	-0.25	-1.5	-0.75			30.44	1.25	-0.5	0.25	1.5	-2	1.75	-1.75	-1	-1.75
	30.48	1	-0.25	-0.25	2	2.25	0.5	-1	-0.25	0.25			30.48	1.75	1.5	0.75	2	0	0.25	-2.25	-1.75	0.75
	30.52	-0.75	0	1.25	1.75	4.25	-1	-1	0.25	1			30.52	-0.25	2.75	0.5	1.25	1.5	-1.25	-2.75	-2.5	1.5
	30.56	-1	0.25	1.25	-0.25	3.25	-0.5	-0.5	1.75	2			30.56	0	1.5	0	-1	0.5	-0.25	-2	0.5	1.25
	30.6	1.75	0.25	-0.5	-0.75	0.75	0	-0.75	2.5	1.75			30.6	1	-0.25	0	-1.25	-0.25	1	-0.25	2.25	1.25
	30.64	2	0	-1.25	0.25	-0.5	-1.25	-0.5	1	0.5			30.64	0	-1.25	0.25	0.75	-0.25	-0.5	0.75	1.25	0.5
	30.68	2.25	0.5	1	0.75	1.25	-1.25	0.5	0.25	0.75			30.68	0.25	-1.25	0.5	1.25	0.5	-1.75	1.75	0.25	-0.25
	30.72	1	1	2	1.5	1.75	-0.75	-0.5	1.5	1.5			30.72	0.5	-1.25	0.5	0.5	1.5	-1	1	1	-0.75
	30.76	0.25	-0.25	2.25	1.75	-1.25	1.75	0.5	1.25	0.5			30.76	-0.25	-1	1.5	0.25	1	0.25	-0.25	-1.25	-1.25
	30.8	-0.25	-1	0.25	1.75	-2.25	3.5	-0.5	0.25	-0.75			30.8	-1.5	-0.5	0.75	-1.5	0	0.25	-0.25	-2.25	-1
	30.84	-1	-0.75	-1.5	-0.25	-0.5	2	-0.5	0	-1			30.84	-2	0	0	-2.5	0	-0.75	-0.25	-0.75	-0.75
	30.88	0	0.75	-1.5	-1	1	0.75	0.5	0.25	-0.5			30.88	-1.25	0	0	-1.5	-0.25	-0.25	-0.5	-1	1
	30.92	0.5	3	0.5	-1.75	0	-0.5	0.75	2.25	-0.5			30.92	-0.75	1.25	-1.75	-1	-1.5	-0.25	0	0.75	0.5
	30.96	1	2	2.25	-0.75	-1.25	-2.5	0	1.5	-0.5			30.96	-0.5	1.25	-1.5	1	-2	-0.5	0.5	0.5	-1.25
	31	1.25	-0.5	1.25	0.5	-0.25	-3.25	1	0.5	-0.5			31	0.25	0.25	-0.5	2	0	-1.5	0.25	-0.75	-2
	31.04	1.5	-0.75	-0.5	1	1.5	-1.75	1.75	0	-0.75			31.04	1	-1.25	-0.75	1.5	1.25	-2	0.75	-1.25	-0.5
	31.08	1.5	-0.5	-2	1	2.5	-0.75	1	0.25	0.75			31.08	1	-0.25	-2	2	1.5	-2.25	0	-0.5	0.25
	31.12	0.5	-1	-1.5	-0.75	1.75	0.25	1.5	0.75	0.75			31.12	0.75	0.25	-2.25	1.5	0	-1.25	0.25	-1.25	0
	31.16	-0.25	-0.75	-0.75	-2	0.75	0.25	0.75	-0.5	1.25			31.16	0.25	0.75	-1.75	-0.25	-0.75	-1	0	-1.5	0
	31.2	-1.5	-0.5	-0.25	0.25	1.25	-1.75	1.25	-1	1			31.2	-0.25	0.5	-1	-1	-0.25	-2	-0.25	-1.25	0
	31.24	-2	0	0.75	2.75	0	-1.75	0.5	-2	-0.5			31.24	-1.25	0	0.75	-1	-1	-1	-1	-1.25	-0.25
	31.28	-0.75	0.75	1.75	2.5	-1.25	0	-1.25	0	0			31.28	-0.75	0.5	0	-1.25	-1.25	2.25	-1.25	0.5	0
	31.32	2.5	1.5	1.75	0.75	-0.5	1	-1	1.25	1			31.32	0	1.25	-1.25	-0.5	0.25	3.75	-1	1.25	-0.5
	31.36	3	-0.25	0.5	-0.75	-0.75	0.75	-0.5	0.25	2.5			31.36	0	-0.25	-0.5	0	0.25	2	-1.5	-0.5	-0.5
	31.4	2.5	-0.75	0.25	-1	-0.25	-0.25	-1.25	-0.5	2.75			31.4	0.5	-2.5	-0.25	-0.25	0.5	0.5	-1	-1.25	1.25
	31.44	1.25	0	0	-0.75	-1.5	-1	-0.25	-0.75	0			31.44	0.5	-2.5	-0.75	0.75	-1.25	-0.25	-0.25	-0.5	1.25
	31.48	0	-0.5	0.75	0.75	-1.75	-1	-1.25	0.25	0			31.48	-0.5	-1	0.5	1.25	-1	0	0.5	0	0.25
	31.52	0	1	0.25	0.5	-0.75	-0.25	-0.5	0.75	-0.25			31.52	0	1	1	0.5	1.5	-0.5	1.5	-0.75	-1
	31.56	-0.25	1.25	0.25	-0.25	-0.25	2.75	-0.5	0	-0.75			31.56	1.75	1	2	0.25	1.25	-0.25	1	-2.5	-1.5
	31.6	0.5	0.75	0.25	-1.5	-0.25	3	0.75	0.5	-0.5			31.6	2.25	0.75	0.25	1	0.25	-0.5	1	-0.5	-0.75
	31.64	0.25	0	0.25	-1	0	1.75	1	0	0.25			31.64	0.75	-0.75	-1.25	0.25	-1.5	-0.75	-0.5	0.25	0.25
	31.68	1.25	-0.25	-0.25	-0.25	1.5	0.75	0	-0.75	0.5			31.68	0.25	-1.75	-1.25	-0.75	-0.5	-0.75	-1	1.25	-0.25
	31.72	1	0.25	0.25	-0.5	1.5	1.25	-0.25	-0.25	0.5			31.72	-1	-1	0	-2	-0.75	-0.5	-1	1.5	0
	31.76	-0.25	-0.25	0.5	-0.5	1.5	2	-2	1	-0.5			31.76	-1.75	-1.75	-0.5	-1.75	-1	-0.25	-1.25	1.25	0.25
	31.8	-1.25	0.5	0	1.25	1.75	2.25	-2.75	0.75	-1.25			31.8	-1.75	-0.5	-1.5	-0.25	-0.25	0.5	-0.5	0.5	0.75
	31.84	1	0.25	0.25	2.25	1.75	1	-0.75	2.25	-1			31.84	-1.25	0.5	-0.5	1	-0.75	-0.5	0.25	1.75	0.5
	31.88	2.75	-1	2	0.5	1.5	-0.75	1	2.25	-0.75			31.88	-0.75	0.25	1.75	0.25	-1	-1.25	0.25	1.5	0.5
	31.92	2.5	0.75	1	-0.75	1.25	-1.5	1.75	0	1			31.92	-0.25	0	2	-2	-1	-1.5	-1	-0.75	0.5
	31.96	2.25	1.75	-0.25	0.25	0	-0.75	1.75	-0.5	2.25			31.96	2	-0.5	-0.5	-2.75	-1.25	-0.75	-1.75	-1	0.5
	32	1.5	0.75	-0.75	0.5	-1	-1	1	-1.5	1.5			32	2.5	-0.75	-2	-2.25	-2	-0.25	-0.5	-0.75	0.25
	32.04	0.5	1	0.75	-1.25	-2.25	-2	-0.25	-0.25	0.75			32.04	0.5	0.5	-0.75	-0.5	-2.5	0.25	0.75	0.5	0.25
	32.08	0.25	1	1.75	-2.75	-1	-1.25	0.25	0.25	0.75			32.08	-1.25	0.75	-0.25	0.25	0	-0.25	1.5	1	0.25
	32.12	0.25	1	0.5	-2.5	2	-0.25	0.75	0.25	-0.25			32.12	-2	0.25	-0.5	0.25	1.75	-1.25	1.5	0.25	-0.75
	32.16	0.25	3	0.75	-0.5	3	-1	-0.5	-0.25	-0.75			32.16	-1.5	2.25	1	1.25	3	-2.25	0.25	-1	-2.25
	32.2	0.5	1.75	0.25	0.75	2.25	-1.5	-0.5	0	0.25			32.2	-1	2.25	1.5	2	3	-1	0	-1	-2.25
	32.24	1.5	0.5	0	1	1	-1.25	-1.25	0.5	0.75			32.24	0.75	1.25	0	0.25	1.25	0	-1	1.25	-0.75
	32.28	1.25	-1.75	0.75	2.75	-0.5	0.5	-1.75	1.5	-0.25			32.28	2.25	-0.75	-0.75	-0.75	0.25	1	-1.5	2.25	0
	32.32	0.25	-2.5	2	2.25	-3	0	-1.75	1.75	-1.25			32.32	2	-1.25	0.5	0.25	-1	0.5	0.25	1	0.25
	32.36	-0.5	-0.5	2.5	1.75	-3.5	-2	-1.25	0.75	-2.25			32.36	1.5	-0.25	2.5	0.25	-1.5	-0.75	0.75	-1	-1
	32.4	0.75	0.25	3	0.5	-1.25	-2.25	-0.75	1	-1.25			32.4	0.25	1	2.75	-1.25	-1.25	-1	0	0	-0.75
	32.44	1.5	1	1.5	-0.25	0.25	0	-0.75	2.25	-1.25			32.44	0.5	1	0.5	-1.75	-0.5	0.5	-1	1.25	-0.5
	32.48	0.25	1.25	-0.5	-1	1	1	0.5	0.25	-0.5			32.48	0	0.5	0	-0.75	0.5	0.75	-1.25	-0.25	1
	32.52	-1	-0.5	-0.25	-1.5	0.75	0.75	1	-1.5	0.5			32.52	-2.25	-0.5	0	1.75	0	1.25	-0.5	-1	3
	32.56	0.5	-0.5	1	-2.25	-0.75	-0.5	0.75	-0.75	0.5			32.56	-1.75	0.25	0	1	-1	0.75	1	-1	3
	32.6	0.25	0.5	1	-1.5	-1.75	-0.5	-0.75	0	0.75			32.6	-0.25	0	0.5	-0.75	-1.25	-1	-0.75	-0.5	0.5
	32.64	-1.5	0.75	0	-1.75	-0.75	0	-0.5	1.5	1.25			32.64	-0.5	-1.5	0.5	-2	0.75	-0.75	-1	1.5	0.25
	32.68	-2.5	0.5	0	-2.25	0.5	1.25	1.25	2	0.75			32.68	-1	-0.25	1	-1	1	1	1	1.5	0.25
	32.72	-1.5	0.25	0.75	-2.5	1.75	1	1	0.75	1.25			32.72	-0.5	1.75	1	0.75	1.25	1	1.5	0	1
	32.76	-0.75	-0.75	0.75	-2.25	1.75	1	-0.25	-1	1.75			32.76	0.5	0.25	0.5	1.25	1.25	1.25	0.75	-0.25	1
	32.8	0	-1.25	-0.5	-1.25	0.5	1.25	-0.75	-1.25	1.5			32.8	-0.25	0.5	0.5	0	-0.25	0.5	-0.75	0	0.25
	32.84	1	-1.75	0	1	-0.25	0.25	0	-1	0			32.84	-1.75	-0.5	-0.25	-1.25	-1	-1.5	0	-0.25	-0.75
	32.88	2.5	0	0	2.75	0	-0.75	0.5	-0.25	-0.5			32.88	-2.25	-1	-1	-2.25	-0.75	-1.25	1	-0.25	-0.75
	32.92	1.75	2.25	0	1	0	-1.25	0.5	0.25	-1			32.92	-2	-0.75	-1.25	-1.25	0.5	-1	0.75	-0.25	-0.5
	32.96	0	1.75	0.25	0.25	-1	-2	0	-1.25	-0.5			32.96	-1.5	-1.5	-0.5	0.5	-0.25	-0.5	0.5	-1.25	-1.25
	33	0	0.75	-0.5	0.5	-0.75	-1.25	0.25	-1.5	1.5			33	-1.5	-0.25	-1	1	-0.25	-0.5	1.5	-1.5	0
	33.04	-0.5	1.25	-1.75	-0.25	0.5	-0.5	0.5	-1	1.25			33.04	-1.5	1.5	-2.25	0.25	-0.75	-0.25	1.25	-0.75	0
	33.08	-1.75	1	-2	0.25	1.25	-0.75	-1.5	-3	-1			33.08	-1	2	-3	-0.25	-0.5	-0.5	-0.5	-2	-1
	33.12	-2.5	0	-1	0.75	0.75	0.5	-2.25	-3.25	-1.5			33.12	-0.5	1	-3	0.5	-1.25	-0.25	-1.5	-2	-2
	33.16	-1.25	0.25	0.75	-0.25	0.75	-1	-2.25	-0.25	0.75			33.16	0.25	0.75	-1	0	0.25	-0.5	-1.25	0.25	-0.5
	33.2	-0.25	0.75	1	-1.25	0.75	-1	-0.75	1	2.5			33.2	0.25	0	0.75	-1.5	1.25	-1.25	1	2	1.25
	33.24	1.25	1	0	-1.25	0.5	0	0.25	0.75	1.5			33.24	0.75	-0.25	1.25	-0.25	1.75	-1	1.75	1	1
	33.28	2.5	0.25	1	-1.75	0.25	0	0.75	0.5	0.25			33.28	2	0.25	0.75	-0.25	1	-1.5	0.25	0.25	0.75
	33.32	1.75	-0.75	2.5	-1	0.25	-0.5	0.75	1.25	0.75			33.32	1.25	0.75	1	-0.5	0.75	-0.5	-0.25	-1.25	1
	33.36	0.5	-1.75	1.25	0	-0.75	-0.25	1	1.25	0.25			33.36	0.5	0.25	1	-1.5	0.25	1	0.25	-2.75	0.5
	33.4	-1	-2	-1	-0.5	-0.5	-0.25	1.5	0.75	-0.75			33.4	0.25	-0.25	-1.25	-1.5	0	0.75	1	-2.5	0.25
	33.44	-2	-1.25	-2.25	0	0.5	0.5	2	0	-0.5			33.44	0.5	-1	-2.5	0.5	0.25	1.75	0.75	-1.25	1.25
	33.48	-1	0.25	-2.25	1	-0.25	0.25	1.25	-0.5	-1			33.48	-0.75	-1	-2	2	-0.25	1	-0.5	-0.25	0.5
	33.52	0.25	-0.25	-1.25	1.5	0.75	-1.5	0.25	-0.5	0			33.52	-0.25	-1	-1.25	1.75	0.5	0	-0.25	-0.25	-1
	33.56	2.5	0	-0.25	0	0.5	-2	-0.25	-0.25	1.75			33.56	1.75	-2	0.25	-0.5	0.25	-0.75	0.5	-0.5	-1.75
	33.6	2	0	1	-0.5	0	-2.25	-1	1	1.75			33.6	1	-2.25	2.25	-0.75	0.5	-2	-0.5	-0.25	-0.5
	33.64	0.75	-1.5	1	-0.25	-0.25	-1.5	-0.25	1.75	1.25			33.64	-0.25	-2.75	3.5	-0.25	0.25	-1.75	-1	1	1.5
	33.68	0.25	-2.5	0.25	0.5	0	-1	-0.25	0.75	0			33.68	-0.75	-1.75	2.25	0	0.25	-2	-1.25	1	1.75
	33.72	2	-2.75	0.25	-0.25	0.25	-1.25	-0.25	-1.5	-0.75			33.72	-0.25	-1.25	0.25	-1	-0.25	-1.75	-0.75	0	0.75
	33.76	1	-1.25	1	0.25	0	0	0.75	-2	-0.75			33.76	0	-1.25	-0.25	-0.5	0.25	-0.75	2	-2	-1
	33.8	-1.75	-0.75	1.5	0.5	-1.25	1	0.75	-0.25	-1			33.8	-0.5	-1.75	-1.5	0.25	0.75	-1.25	2.5	-1.75	-1.5
	33.84	-0.75	-0.25	1.75	-0.25	-2	0	0	1	-0.25			33.84	0.5	-0.25	-1.25	0.25	0.25	-1.5	1.75	0.25	-2
	33.88	0.5	1	0.5	-0.5	-1	0.25	0	1	0.25			33.88	0.75	2	-0.25	0.5	-0.75	-0.25	1.25	1.75	-0.25
	33.92	0	2	1.25	-2.25	-0.5	0.25	-0.25	0.25	1.75			33.92	-0.5	3	2.5	-0.75	-3	0.75	0.5	2	1.25
	33.96	-0.5	1.5	2.75	-3	1.5	-0.75	0.25	-0.5	1.5			33.96	-2.75	1.25	3	-1	-1.75	-0.25	0.25	1.75	-0.75
	34	0	1.5	0.5	-2	3	0	-0.25	-0.5	-1			34	-2.25	1	0	-0.75	1.25	-0.25	0.25	0	-1.5
	34.04	1.75	1.75	-1.25	-0.75	3.5	1	-0.25	0	-2.5			34.04	0.75	0.75	-1.25	-0.25	2	-0.75	-0.75	0	-1
	34.08	1.25	1	-0.5	0.25	2.5	0.75	-1.75	-0.25	-1.5			34.08	1.75	-0.75	-0.5	0.25	1.5	-0.25	-2.5	0	-0.25
	34.12	0.5	-0.75	0.25	-1	1.75	0	-2.25	-1.5	-1.25			34.12	1.75	-0.75	-0.5	0	1.25	-0.75	-2	-0.75	-0.75
	34.16	0.75	-2	0.5	-1.75	0.75	0	-1.5	-1.5	-1.25			34.16	0.5	-1.25	-0.25	-1	0.25	-1.25	-1.25	-0.5	-1
	34.2	-0.25	-2	-1	1	-1	-0.5	-0.75	-0.25	-0.5			34.2	-2	-1.5	-0.75	0.5	-0.75	-0.25	-2	-0.25	-0.25
	34.24	-0.5	-0.25	-1	2.5	-1	-0.5	-0.75	-0.25	-0.25			34.24	-1.75	-1	-3	2	-0.5	1	-2.5	-1	0
	34.28	0.5	0.5	0	1.75	-0.75	-2	-1.25	0.25	0.25			34.28	-0.25	-0.25	-3.25	1.25	0	1	-1.5	-0.5	-0.25
	34.32	1.5	0.5	-0.25	-0.5	-1.75	-2	-0.25	2.5	0.25			34.32	0.25	-0.25	-2	0.25	0.25	-0.25	0.25	1.25	-1
	34.36	1.5	2	-1	-0.75	-2.75	-1	0.25	2.25	0.25			34.36	0.75	0	-1.25	1.5	-0.5	-0.5	0.25	1	-0.25
	34.4	-0.25	2.25	-0.25	0.5	-3.5	0.75	-1.5	2.25	0.75			34.4	1.25	0.5	-0.5	3.25	-0.5	1	0.25	1.25	-0.5
	34.44	-0.75	0.5	0.5	0	-3	2.25	-1.25	1	1.25			34.44	1.75	-1	-0.5	2.5	-0.25	2.25	1.25	0	0.25
	34.48	0	-1.25	0.25	0	-2	1.75	0	-0.25	-0.5			34.48	3	-1.25	-0.25	1.5	-1.25	1.75	2.5	-0.75	0.25
	34.52	0	-0.25	-0.25	0	-1.25	0.75	-0.5	0.5	-1			34.52	2.5	1	-0.75	-0.5	-2.25	0.75	1.25	-0.75	0.75
	34.56	-0.75	0.5	-0.5	-0.5	-0.5	0	-0.25	0.5	0			34.56	0.5	1.5	-1.25	-0.75	-1.25	0	-0.25	-1	2
	34.6	-0.75	0.5	0.5	-1.5	1.25	0	-0.5	-1.25	0			34.6	-1.75	1	-1.25	-1.75	1.5	1	-1	-0.5	2.75
	34.64	-1	0.25	2	-3.25	2	0.25	0	-0.75	1.75			34.64	-2.5	1.25	-0.25	-3.25	3	1	-0.25	0.75	3
	34.68	-1.5	0	0.75	-3.25	2	-0.5	0	1.25	2			34.68	-2.5	1.75	0.75	-2.75	3.5	-0.25	0.75	1.5	1.5
	34.72	0	0.5	-0.75	-0.5	2	-1.75	1.75	1	0			34.72	-1.75	1.25	0	-1.5	3.5	-1.5	2.5	0.25	-1
	34.76	1.5	0.25	-0.25	0.25	2.5	-3.25	2	-1.25	-1.5			34.76	-0.75	1.25	-0.5	0.5	1.75	-1.5	2.75	-1.5	-1.25
	34.8	1.25	0.75	2	-1.25	1.25	-3	1.75	-2	-0.5			34.8	-0.25	0.75	1.25	0.25	-0.25	-0.75	1.75	-1	-0.5
	34.84	1.5	1.5	2.25	-2.25	-0.5	-1.5	0	-2	-0.5			34.84	0.75	0.5	3.75	-1.25	-2.75	-0.5	-0.25	-1.75	-1
	34.88	1	0.25	0.75	-2	-1.75	-1	-0.75	-2.5	-0.75			34.88	0.75	0.75	3.5	-1.25	-2.75	1.25	-1.75	-2.75	-2
	34.92	0.5	-1.25	-1.75	0	-1	-0.25	0	-1.5	-0.75			34.92	0	0.25	-0.5	0.75	-1.5	0.5	-2.25	-2.5	-2
	34.96	0	-1.75	-2.25	2	-0.75	1	-1	1	-1.25			34.96	0.75	-0.75	-2	2	-1.75	0.5	-1.75	-1	-2
	35	-1	-1.5	-2.25	2	0.5	0.75	-0.75	1.5	-0.75			35	1.25	-1	-1	1.75	0	0	-0.75	0.5	-1.25
	35.04	-0.5	-0.75	-1.75	2.25	1.25	-0.75	0	1	-1.25			35.04	1.75	0.25	-0.25	0.5	2	-0.75	1	1.75	-1
	35.08	2.25	0.5	-2	1	1	-1.75	1	-0.75	-1.5			35.08	2	1	0.25	-1	1.5	-0.75	2.75	0.25	0.25
	35.12	1.75	-0.25	-1	-0.75	-0.25	-0.5	1.5	0.75	-1.25			35.12	1	0.5	-0.75	-0.5	-0.5	1	3.75	-2	0.75
	35.16	0	1.25	0.5	-2.25	-0.5	0.75	0.5	2.25	0.75			35.16	0.75	0.75	0	0.75	-1.5	0.75	2.75	-1	1.25
	35.2	-1.25	1	1.75	-2.5	-0.25	0.75	-0.5	0.5	2.5			35.2	-0.5	1.25	1	0.25	-0.5	-1	1.5	0	1
	35.24	0	0.25	1	-2.25	0.25	1	-0.25	-0.5	2			35.24	-0.25	0.5	0.5	-0.5	0.25	-0.5	-0.25	0.25	1.25
	35.28	1.75	-0.75	0.75	-0.75	-0.25	0.25	-0.75	-0.5	1.25			35.28	0.25	-1	-0.25	0.75	-0.25	0	-2.5	0.25	2.5
	35.32	1.75	-1	0.5	-0.75	-1.25	-1.5	-2	-1	1.75			35.32	0.5	-1.75	-0.5	1.5	0	-1.5	-3.5	-0.25	3.25
	35.36	1.25	-1	1	-1.5	0.25	-0.75	-2.5	-1.5	2			35.36	0	-2.5	-1.25	1.25	-0.25	-2.75	-2.25	0.25	2.5
	35.4	-0.25	0	0.75	-2.75	2	1.25	-2.25	0	0			35.4	0	-2.75	-2	-1	1.25	-2	-1.25	0.5	-0.25
	35.44	-1.25	-0.25	-0.5	-2	1	1	-0.75	0	-1.75			35.44	0	-0.75	-3.25	-3.25	-0.25	-1	0	0.5	-1.75
	35.48	-0.75	0.25	0	0.25	-1	0.25	-0.5	0.25	-2			35.48	-0.25	-0.75	-2.25	-3.75	-1	-0.25	0.25	1.25	-1.5
	35.52	-1.25	1.5	1.5	1.5	-1.5	1.25	-0.5	0	-0.5			35.52	-1	-0.25	0.25	-2	-0.5	1.25	0.75	0.5	-0.5
	35.56	-1	0.5	0.5	1.25	-2.5	0.5	-2	-0.25	-1			35.56	-0.75	0	0.5	0.75	0	3	0.5	0.5	-1
	35.6	0.5	-0.75	-1	-0.25	-3	-0.25	-1.75	0.5	-2.5			35.6	0.5	1	0.25	1.5	-1.25	3	-0.5	0.75	-1.5
	35.64	0	0	-1.75	-0.5	-2.75	-0.25	-1.25	0.75	-2.5			35.64	1.25	2.5	-0.5	1.25	-2.25	1.75	-0.75	0.5	-2.25
	35.68	1	0	-1.75	-0.25	-1.5	-0.5	-0.25	-1	-0.75			35.68	1.5	2.5	0	1	-2.25	-0.5	-0.25	-0.25	-0.75
	35.72	1	-1	0.25	-0.75	-0.75	-2.25	0	-1.25	-0.5			35.72	0.75	0.75	0.5	0.5	-1.5	-2.75	-0.5	-0.5	0.5
	35.76	-0.75	1	1	-2.25	0	-3	0.75	-0.25	-0.5			35.76	-0.75	-0.25	1	-0.25	0	-1.75	0.75	-0.5	0
	35.8	-0.5	2.75	1.5	-2.75	0.25	-2.5	1.5	-1	-1			35.8	-0.5	-0.75	0.75	-1.5	0	-0.75	1.5	-0.5	0.25
	35.84	0.25	1.25	2	-2.5	-0.5	-1.25	1.75	-1.75	-3.25			35.84	0	-1	0.75	-1.75	0.75	0.75	1	-0.75	-1.25
	35.88	0	-2.25	0.5	-0.75	-0.25	-1.25	1	-0.5	-2.25			35.88	0.25	-3	-0.25	-1.5	1	-0.75	0.5	-0.5	-1.25
	35.92	0.75	-3	-2	0	1.25	-2	-1.75	0	0.5			35.92	0.5	-3.75	-0.5	-1.25	1	-3.5	0	0	-1
	35.96	0.5	-1	-0.75	-1.5	1.5	-1.75	-1	-1	1.5			35.96	-0.75	-2.75	1.75	-1	0.5	-4.5	0.75	0.25	-0.75
	36	-0.5	1.75	1.25	-1.75	0.75	-1.75	0.75	-0.25	0.5			36	-1.25	-0.25	2	0.25	1	-3.25	1	1.5	-1
	36.04	-1.5	2.75	1.75	-0.5	0	0	1	0.75	1			36.04	-0.75	2.25	1.25	1	0	-0.5	0.5	1.25	0
	36.08	-3	0.5	0.5	0.75	0.5	1.75	0.25	1.25	-0.25			36.08	-0.75	1.75	1.5	1.5	-0.25	1	-0.5	-0.75	-0.5
	36.12	-2.25	-1	-1.25	1.5	1.5	-0.25	0	1.25	-0.5			36.12	-0.25	0.25	-0.75	3.25	-0.5	0.25	-1.25	-1	-0.75
	36.16	0	-1.5	-2.5	1.75	1.25	-1.75	-1	1.5	0.5			36.16	-0.75	0.25	-2	4.25	-1.25	-0.5	-2	2	1.25
	36.2	2.25	0.25	-2.5	1	1.25	-2.5	-1.5	0.25	1.25			36.2	0.5	1.5	-1.5	2.75	-0.5	-0.25	-1.5	1.25	1
	36.24	2.75	0.75	-1.5	0.25	1	-1.5	-1.75	-0.75	1.75			36.24	2	2	-0.5	0	-0.75	0.25	-1.5	-1.75	0.75
	36.28	1.25	0.75	-0.25	-1.5	0	-0.25	-1.25	-0.5	2			36.28	1.25	1.75	-0.25	-1.5	-1	1.5	-1.25	-2.5	1.75
	36.32	0	-0.5	1.5	-1.75	-1	0	-2	-1	0.75			36.32	0	0.25	-0.75	-1	0	2.75	-1.5	-3	1
	36.36	0	0	1.5	-1.5	-1	0.25	-3	-2	0.25			36.36	-1	0.5	0.25	0	0.75	2.25	-0.5	-2.75	0.25
	36.4	0	-0.25	1.25	-2	-1.25	0	-2.5	-0.5	1			36.4	-1	0	1.25	-0.25	0.5	0	0.5	-0.75	0.25
	36.44	-0.25	-0.25	2.25	-1.5	-0.75	0.75	-0.75	0.5	1.5			36.44	-0.5	0	1.25	0.25	-0.75	-0.75	0.5	0.75	0.5
	36.48	-1.75	0	1	-1.75	-0.5	0.25	-0.5	1	0			36.48	0	-1	-0.5	-1	-0.5	0.25	-0.75	0.75	0.25
	36.52	-1.5	-0.75	0.25	-2.25	-1.25	0.75	1.5	0.5	-0.5			36.52	-0.25	-1	-1	-0.5	0	0.75	-0.75	-0.75	-1.5
	36.56	-0.5	-1	0.25	-0.25	-1	0.5	1	2	-0.25			36.56	0.25	-1.25	-0.25	1.5	-0.25	0.25	-0.5	0.25	-1.75
	36.6	0	-1.25	0.25	0.75	0.75	-0.75	0	2.5	0.25			36.6	0.75	-2.75	0	2.5	0	-0.5	-0.25	0.5	-1.25
	36.64	-0.25	-0.75	0.25	-0.75	1.25	-1.75	0.75	0.25	-0.5			36.64	-1.25	-2.75	0	1	0.25	-1	0	0.25	0.5
	36.68	0.75	-0.5	-0.25	-0.75	0.5	-2.5	2.25	-1.5	-2.25			36.68	-1.25	0.25	-1	-0.25	0	-1.75	1.25	0.75	0.5
	36.72	1.5	-0.25	0.75	0.25	-0.25	-1.5	1.5	-0.5	-2.5			36.72	0.75	2.25	0.5	0.25	0.75	-2	3.5	1.5	-0.25
	36.76	2	0.5	1.75	-1	-1	-0.25	0.25	0	-1			36.76	0.75	2	3.25	-0.75	1	-1.25	1.75	0.5	0
	36.8	1.75	1.25	0.5	-2.75	-1.5	-0.75	-1.75	-0.25	0.5			36.8	0.75	1	2.25	-2.75	-0.25	0	-1.25	0.25	0
	36.84	0.75	0.25	-0.5	-3.25	-1.5	-1	-1.25	-0.75	0.75			36.84	1.75	0.5	0	-2.25	-0.25	-0.5	-1.25	0.75	0.75
	36.88	-1	-1.5	0.5	-1.5	-1	-1.5	-0.75	-1.5	0			36.88	0.75	-0.5	0	-0.25	-0.5	0.25	0.5	1.25	1.75
	36.92	-1.5	-3.5	1.25	-0.5	-0.5	-1.5	-1.25	-1.25	0			36.92	-1.75	-1.25	1.25	0	-0.25	1.75	1	0.75	1
	36.96	-1.5	-1.75	-0.25	-1	-0.75	-1.25	-0.25	-0.75	-0.25			36.96	-3.25	-1	1.25	-0.75	-0.75	2.25	1.25	0.25	0.25
	37	-0.5	1.25	-2.5	0	-0.25	0	0.5	-1.25	0			37	-2.25	-0.25	-1	-0.25	-1	1.25	0.25	-1	-1.25
	37.04	0.5	1	-3	0	0.75	0	-1.25	-0.25	0			37.04	0.25	0	-1.25	-0.25	0	0.25	-1.5	-1.5	-1.75
	37.08	1.25	0.75	-2	-0.5	0.25	0.5	-1	-0.75	-0.25			37.08	3.25	0.5	-0.5	-0.75	1.25	-0.5	-0.5	-1	-2.75
	37.12	2.5	0.75	-1.75	-0.75	0.5	0	-0.5	-0.25	-2			37.12	2.5	1.25	-1.25	-1	1	-1	-0.5	0	-2.5
	37.16	2.5	1	-1.25	-0.5	0.5	-1.5	0.75	0	-3.25			37.16	0.75	1	-1.75	-0.25	-0.25	-2.75	0.25	-0.75	0
	37.2	0	1.75	0.5	-0.75	0.25	-3.25	1.25	0	-2.5			37.2	-0.75	0.25	-1.75	0.25	0.25	-4	1	-0.5	1.5
	37.24	-0.25	0	1.25	-0.25	1.25	-0.75	-0.5	-2	-0.25			37.24	-0.75	-0.5	-1	0.25	1	-1	-0.5	-0.25	1.75
	37.28	-0.25	-1	-0.25	-1	1.25	1.5	-2.25	-2.75	0.75			37.28	-0.25	0.25	-1.75	0.75	0.5	2	-1.5	0.25	0.75
	37.32	0	-0.25	-0.75	0	-0.25	0	-1.25	-0.75	0.75			37.32	-0.25	0.5	-1.75	2.5	-0.75	1	-0.5	-0.5	0.5
	37.36	-0.75	-1.5	-0.5	2	-0.75	-0.75	0	0.25	-0.5			37.36	-0.25	-1.25	-0.5	2.75	0.5	0	0.25	-1	-1.25
	37.4	-1.75	-2.25	0.5	2.5	-0.75	-1.5	0.5	-1	-0.25			37.4	-1	-1	0.5	2	1	-0.75	-0.5	-0.75	-0.75
	37.44	-2.5	-1.5	1.25	0.25	-0.75	-2.75	-0.5	-1	-0.25			37.44	-2.25	-0.25	0.25	0	0.5	-1.25	0	0	0.25
	37.48	-2.25	-0.25	-0.75	-1.25	-1.5	-0.25	-1.75	0.25	-0.25			37.48	-2.25	0.5	-1	0	-1	-0.25	0.25	1.5	0.75
	37.52	-0.5	0.75	-3.75	-1.75	-1.75	2.5	-2	1.25	-0.5			37.52	-0.25	0	-1	0.25	-2.25	1.5	0.25	2.25	0
	37.56	1.5	-0.75	-4	-1.25	-2	2.25	-1.5	1.5	0			37.56	3	-1.5	-0.75	-1	-2	1	0.5	2.25	-1.25
	37.6	2	-0.75	-2	-1.5	-2.25	1	-2.25	0.5	0.75			37.6	3.25	-1.75	-0.75	-0.25	-1.5	-1	-1.25	1	-0.5
	37.64	1	-0.75	-0.5	-2	-1.75	-0.75	-2.75	-0.75	-1.25			37.64	1.25	-0.25	-0.75	0.25	-1	-2	-1.5	-0.75	1.25
	37.68	0.25	-1.5	0	-1.5	-0.75	-2.25	-1.25	-0.25	-3			37.68	-0.25	1.5	-0.25	-0.5	-0.25	-1.5	0	-1	1.25
	37.72	1.5	-2.5	-0.25	-1	-0.25	-2.75	-0.75	0	-2.75			37.72	0.25	0.25	0.75	-1	0.5	-1.75	0	-1	0.25
	37.76	2.25	-2.25	0.5	-0.5	-1	-1.5	-0.5	-2.5	-1.75			37.76	1.75	-1.25	1.25	-1.25	0	0	0.25	-1.75	-0.5
	37.8	-1.25	-1.5	0.5	0.25	-2	0.25	0	-4	-0.75			37.8	1.25	-1.5	1.25	-1.25	0.75	1.25	2.5	-2	0
	37.84	-3.5	-0.75	-1.25	1.25	-2.75	1.5	0	-2.5	-1			37.84	-2.5	-0.25	-0.5	-0.75	0.5	0.75	2.5	-1	-0.5
	37.88	-3.25	0.5	-3.5	0.25	-1.25	0.25	0.25	-2	-0.25			37.88	-4.5	0.5	-2.5	-0.5	0.25	-0.5	0.25	-1.75	-0.25
	37.92	-1.25	1.25	-3.5	-2.5	1.75	0.75	0.5	-1	-0.25			37.92	-3	0.25	-0.5	-1.5	2	0.5	-1.25	-2	-1.25
	37.96	1	1.75	-1.5	-3.5	1	0	-0.75	1	0.25			37.96	-0.25	1.25	1.25	-1.5	2	0.75	-2.25	-0.25	-1.5
	38	-0.75	1.5	1	-1.5	0.25	-1	-1.5	2.25	0.25			38	1	0.75	2.25	-1	1	0.5	-1.75	0.25	-0.75
	38.04	-2.25	1	2.5	0.25	0	-2	-1	1	-1			38.04	0.5	0.75	2.25	0.5	0.25	0	-1.25	0.25	-0.5
	38.08	-0.75	0.5	2.25	-0.25	0.5	-2.75	0	-0.25	-2.25			38.08	0.75	0.75	1	1.5	-0.5	-0.5	-0.5	-0.25	-1
	38.12	0.5	-1.25	1.75	-2.25	1.25	-1.75	-0.25	-1	-2.75			38.12	1.75	-0.25	1.5	1.5	-0.25	-0.75	0.75	-0.5	-1
	38.16	2	-2.5	0.25	-3.5	0	-2.25	-1.25	0	-2.25			38.16	2.5	-1.25	1.75	1	0.75	-1	-0.25	-0.25	-0.5
	38.2	1.5	-2.25	-1.75	-2.25	-2	-3.5	-2.25	-0.25	-1			38.2	1.5	-1.75	0	1.25	-0.25	-1.5	-1.5	-2.25	0
	38.24	-0.25	-1.5	-4	-0.75	-1.25	-2.5	-2	-1.5	0.25			38.24	-0.25	-2.25	-2	1.75	-1.75	-1	-1.5	-2.5	0.5
	38.28	-1.75	-0.25	-2	-0.25	0.5	-1	-0.5	-2.5	0.25			38.28	-1.25	-1.75	-1.5	0	-1.5	-0.25	0	-1	0
	38.32	-1.5	0	-0.25	-0.5	0	0.25	-0.75	-2	-0.25			38.32	-1	-1.25	-1.5	-1.5	-1.75	-0.75	-0.5	-0.5	-0.25
	38.36	0.5	1	0	0	-0.5	-0.25	-0.75	-0.75	0.5			38.36	-0.25	0.75	-1.5	-0.25	-0.75	-0.75	-1	0.75	1.25
	38.4	0.5	1.5	-0.75	-1	-0.75	-1.25	0	-1	1.25			38.4	-0.75	1	-0.75	0.75	-0.75	-0.75	-0.5	0.5	1.75
	38.44	-0.25	-0.25	0.25	1.25	-2	-2.75	0.5	-0.5	1.5			38.44	-0.25	-0.25	-0.5	1.5	-2	-1.25	1	-1	1.5
	38.48	-0.75	-1.5	0	3.25	-2	-1	0	0	1			38.48	-0.5	-0.75	-1.5	1.25	-1.75	0.5	1	-1	1.75
	38.52	-1.5	-1.5	-0.75	2.25	-0.75	1.25	1	0.25	-0.25			38.52	0	-0.5	-1.25	0.25	0	3	0.75	0.25	0.75
	38.56	-1	-1.25	0.5	-1.5	-1	0.75	1	0.25	-0.25			38.56	1.25	-0.25	-0.25	-1	0.5	2	0.75	0.75	0
	38.6	-1.25	-3	1.5	-2.5	-0.5	0	-1.25	-0.75	1			38.6	2.25	-1.75	-1	-1	0	0.5	0.75	0	1.25
	38.64	-1.25	-3.5	0.75	-2	1	-0.25	-3.25	-2	2.75			38.64	0.25	-2.5	-0.5	-0.25	-1	-0.5	-0.25	-1.5	3.75
	38.68	0	-2.75	-0.5	-2.5	1.25	0	-2.5	-2.25	2			38.68	-1	-0.5	0.75	-1	-0.5	-0.5	-0.75	-2.75	2.5
	38.72	0.75	-2	-1.5	-1.75	0	-0.5	-1.25	-2	-0.75			38.72	-1.75	0.75	0.75	-1.5	-0.5	-1	0.25	-1.5	0
	38.76	1.75	-1.5	-1.25	-0.5	0.25	-0.5	0.75	-1.25	-3			38.76	-0.75	1	0.5	-0.75	0.5	-1.25	1.25	0.75	-2
	38.8	1.25	0.25	-1	-1	0.25	0.5	-0.25	-0.75	-3.75			38.8	-0.75	1.75	0.25	0.25	2	0.5	-0.25	3.25	-3.5
	38.84	-1	2	0	-2.75	-1.5	-0.25	-0.5	-1.25	-2.5			38.84	-1.5	2.25	0.25	-0.25	1.75	1.75	-0.75	2.5	-3.25
	38.88	-2	2	-0.75	-3.75	-3	-1	-1.25	0.25	-0.25			38.88	0	1.5	-1.25	-1.25	0	0	0	2	-1.75
	38.92	-1.25	0.5	-1.5	-2.5	-2.5	-1.5	-1.5	1.75	2.5			38.92	1	0.5	-2.25	-1	-1.25	-1.25	0.25	2	0
	38.96	-1.75	-1.5	-1.5	-0.75	-0.5	-1.5	-1	2.75	3			38.96	0.5	-1.25	-1.75	0	-0.75	-0.75	0.5	3	0.5
	39	-2.5	-2.5	-1.25	0	1	-0.75	-1.25	2	0.5			39	-0.75	-1.75	-2	0.75	1.5	0.5	0.25	2.5	-1.25
	39.04	-1.25	-1.25	-1.25	0.5	0	-1.25	-2.25	0.75	-2			39.04	-0.75	-1.25	-1.25	0.75	1.5	1.5	0	-0.25	-2.25
	39.08	0.25	-0.75	-1.25	0	-1	-1.5	-2	-0.25	-3			39.08	1.5	0.25	-0.5	0.75	-0.25	2	-0.25	-1.25	-1.5
	39.12	0.5	0	-1	-1.25	-1.5	-0.5	-2	-1.25	-2.25			39.12	2	2	-1.5	1.25	-0.5	0.25	-0.5	-1	-0.75
	39.16	0.25	0.5	-0.5	-2.75	-1.5	-0.25	-0.25	-0.25	-0.75			39.16	1.5	1.25	-1.25	0	1	-0.25	1	-0.75	0.25
	39.2	-0.75	0	1	-2.5	-2.5	-0.75	1.75	0.5	0.25			39.2	-0.75	0.25	1.25	-0.5	1.75	1	2.25	-0.75	0.75
	39.24	-1	-0.5	-1	0	-1.25	-1	-0.5	0.5	0.5			39.24	-3	-0.25	0.75	0.25	1.5	1.75	0.25	-0.25	0.25
	39.28	0	0.75	-2	0.5	0.5	-1.25	-1.5	0.75	1			39.28	-2.5	0.75	-0.25	-0.5	0.25	1	-0.5	0.75	0.25
	39.32	0	0.5	-0.75	0	0.5	-0.75	-1.25	-0.25	0.5			39.32	-1.25	0.25	0.75	-1.5	0.25	-0.75	-0.75	-0.25	-1
	39.36	1	-1	0.5	-1.25	-0.75	-1.25	-0.5	-2	0.25			39.36	0	-1.75	1	-1.5	1	-2.25	-0.75	-1	-1.5
	39.4	1.75	-2.25	1	-2.25	-2.25	-1.75	-0.75	-2.5	-0.25			39.4	1.75	-3	0.75	-1.25	-0.75	-2	0.5	-0.75	0.25
	39.44	1.5	-2.75	0.5	-0.75	-2.75	-1.25	0	-1	-1			39.44	2.25	-2.25	0.75	0	-1.75	-1	2.25	0.25	0.5
	39.48	0	-2.25	1.25	0.75	-2.75	-0.75	0.5	-0.25	-2.75			39.48	1	-1	1.5	1.25	-2.25	0.75	1	-1	-0.25
	39.52	-1	-0.75	1.5	0.5	-1.75	-0.5	-0.5	-0.5	-2			39.52	-0.75	0.75	1.75	2.25	-0.75	0.75	-0.25	-2.75	-0.25
	39.56	-1.25	-0.5	0.25	-1	1	-0.25	-1.25	-1.25	-0.75			39.56	-0.75	0.5	-0.25	2.25	2	0.25	0	-2	1
	39.6	-2	0.25	-1.5	-0.75	0	0	-2	-1.75	0.5			39.6	0.75	0.75	-1	0.5	1	0.75	0.25	-0.5	1.5
	39.64	-1.75	1	-1.75	-0.5	0.75	-0.75	-1.5	-0.75	0.25			39.64	1	0.75	-1	-0.5	1	1.5	-0.5	1.5	0.25
	39.68	-2.25	1	-1.25	-2	2.25	-1.5	-1.25	0.25	0			39.68	0.5	-0.25	-0.25	-0.5	0.75	0	-0.25	1.25	0
	39.72	-1	0.75	-0.25	-2.75	1	-2.25	-0.75	1	-1.25			39.72	0.25	-0.5	-0.25	-0.25	-1	-2.25	-0.25	0	-1.25
	39.76	-0.5	0.5	0	-1.25	1	-0.75	-1.25	1	-1.5			39.76	-0.25	0	-0.75	-0.5	-0.5	-2.25	-0.25	-0.25	-1.25
	39.8	0	-0.5	-0.25	-0.5	1.25	0.25	-2	0	0.25			39.8	0	1.25	-0.75	0	-0.25	-0.75	-0.75	-0.25	-1
	39.84	2	-1.75	-1.25	0.5	0.25	0.75	-2	-1	1.25			39.84	-0.25	1.25	-0.75	0.5	0.25	-0.25	-0.75	0.25	-1.25
	39.88	1.25	-1.5	-0.5	-0.5	-1.5	-0.5	-2.25	-1.5	0.5			39.88	-0.75	0.5	-1	0	0.5	-1.5	-1	0.75	-2
	39.92	-0.25	-2.75	1.75	-2.75	-1	-2	-1	-0.75	1			39.92	-1.75	-2.25	0	-0.75	1	-1	-0.75	0.75	0.5
	39.96	-1	-2.5	0.5	-2.75	0.5	-3.25	0.5	-0.5	-1.25			39.96	-2	-2.25	-1	0.25	0.75	1	0.5	1	1.5
	40	-1.5	-2	-2.5	-1.5	0.75	-3.5	0.25	0	-1			40	0	-0.5	-2	-0.25	0.25	0.25	0.25	1	1.25
	40.04	-0.75	-1.75	-3.5	-1.75	0.5	-1.75	-1.25	-0.5	-0.5			40.04	1	1	-1.75	-1.75	-1.25	-0.5	-0.75	-0.25	0.5
	40.08	0.25	0.75	-2.25	-2.5	-1.5	-1.5	-2	-0.75	-2			40.08	1.25	2.5	0	-3	-1.75	-1.75	-1.5	0.25	-0.75
	40.12	-0.75	1.5	-0.75	-1.25	-2.25	-2	0.75	0.5	-2			40.12	1.25	2.25	0.5	-1.5	-0.75	-2.25	0.25	1.25	-1.5
	40.16	-1.5	0.25	-0.5	-0.25	-0.75	-0.75	1.75	1.5	-1.25			40.16	2	0.75	0.5	1	0.25	-0.75	0	1	-1.25
	40.2	-1.75	-2.75	0	0.5	0.5	1	1.5	0	-1.25			40.2	1.75	-1	0.25	1.75	0.75	1.25	-1	-1.25	-1
	40.24	-0.5	-3.5	0.5	1.5	-0.25	1.25	-0.25	-0.25	-0.25			40.24	-0.5	-1.25	0.75	2.5	1.25	2	-0.5	-1.25	0
	40.28	-1	-1.75	-0.75	1	-1	0.25	-3	-0.75	-0.5			40.28	-2.25	-0.25	0	1.5	0.5	2.25	-0.5	-1	-0.75
	40.32	-1.25	-0.75	-1.25	0.5	-1.5	-0.25	-4.25	-2	0			40.32	-1.25	1.5	-0.25	0.25	-1	1	-0.75	0	-1.25
	40.36	0	-1	-1	-0.5	-1.5	-0.75	-2.25	-0.75	1.25			40.36	0.75	0.5	0.5	0.75	-0.75	-0.5	-0.75	1	1
	40.4	1	0	-0.75	-1.25	-1.25	-0.5	0	-0.25	1.5			40.4	1.5	-1	2.25	0.25	-0.5	-0.5	0.25	0.5	1.5
	40.44	1	-0.75	-1	-1.25	-1	1.5	0.5	-0.25	1			40.44	0.75	-2.25	2.25	0.5	-1	0.75	1.75	-0.25	0
	40.48	-0.5	-1.5	-1.25	-1.25	-1	1	0.25	0.5	0.5			40.48	-0.5	-2.5	1	-0.25	-0.75	0.5	1.5	1.25	-0.5
	40.52	0.25	-2.25	-0.25	-1	-0.25	-0.25	-1	1.25	-0.25			40.52	-1.25	-2.25	0.5	-1	-0.25	0	0.75	1.75	-0.25
	40.56	0	-4	1.25	-1.5	-0.25	-1.5	-1.5	-0.5	-0.5			40.56	-1.5	-1.75	1.75	-0.5	1	-0.75	1	-0.25	0.75
	40.6	1	-1.75	3	-0.75	-1.25	-1	-0.75	-0.25	0			40.6	0	-0.5	2.75	0.5	2.75	-0.75	2	-0.5	1
	40.64	-0.5	1	3.25	-0.5	-0.5	0.5	-0.75	0	-0.75			40.64	0.75	-0.5	2.25	2.25	2.25	2	0.75	0.25	-0.25
	40.68	-2	2.5	2.5	-1.5	-0.75	0.5	-1	-0.25	-1.5			40.68	0.75	0	2.25	2.75	0.5	2	0.5	0	-0.5
	40.72	-1.75	0.75	0.5	-1.75	-0.25	1.5	-0.5	-0.5	-1.25			40.72	-0.25	0.75	2	2.75	0.25	0.75	0.75	-2	0.25
	40.76	-0.25	-1	-0.5	-1.75	0	0	0.25	-0.25	-0.5			40.76	-0.75	1.25	0	0.75	0.75	-1.25	-0.25	-1.75	-0.25
	40.8	0.25	-1	-1	-1.25	0.75	-0.5	0.75	0	0.25			40.8	0.25	1	-1.25	-1.25	0.25	-1	-0.75	0	-1
	40.84	-1.5	0.75	-0.75	-1.25	-0.25	-0.5	1	0.5	0.25			40.84	0.25	0	-2.25	-2.25	-0.25	1	-0.25	0.5	-1.25
	40.88	-1.75	0	-0.25	-0.5	-2	-0.75	1	-1.25	-1			40.88	0	-1.5	-2.5	-0.75	-1	-0.25	-1.5	-0.75	-0.75
	40.92	0.75	-1.75	-1	-0.75	0	-1.25	-0.25	-2.25	-0.5			40.92	-0.25	-0.75	-1.75	-0.75	-2	-2.25	-2.5	-1	0
	40.96	2.25	-1.75	-1.5	0.5	1.75	0	-1	-0.75	-1			40.96	0.75	0	-0.5	0.25	-1.5	-2.25	-0.5	-0.25	-0.25
	41	0.75	-0.5	-1.5	1.5	0.75	0.75	-2.25	0.25	-1.25			41	0	0.5	-1.5	1.25	-1.25	-1.75	0	0.25	-0.25
	41.04	0.25	0.75	-1.75	0.5	-0.5	-1.25	-1.5	0.25	-0.5			41.04	1	1.25	-2	1.5	0	-1.75	0	-0.5	-0.25
	41.08	-1	0.75	-0.5	-0.25	-1	-2.25	-0.5	0.5	0.5			41.08	0.75	2.25	0	0.75	0.5	-1	-0.25	0.25	0.25
	41.12	-1.25	0.75	-1.25	-0.5	-1.25	-1.75	0.25	-0.75	0			41.12	0	1	-0.5	0	0.25	-1	1	0.75	0.25
	41.16	-1	0	-2	-1	-1	0	1.5	-1.25	-0.25			41.16	0.25	-1.25	-1	0.75	-0.5	0.25	2.25	-0.25	-1.5
	41.2	-1.25	0	-1.75	-1.25	0	-1	3.5	-1	-0.75			41.2	-0.25	-1.5	-1	-0.25	-0.25	0	3.5	0	-0.5
	41.24	-0.25	0	-2	-1.5	1.5	-2	2.5	-0.5	-2			41.24	-0.5	0.5	-0.5	-1.5	0.75	-0.5	1.5	-0.5	0.75
	41.28	2	-0.25	-2	-0.25	0.75	-1.75	-0.25	-0.25	-2.5			41.28	0.75	1.25	0.5	-0.75	0.5	0.25	0.25	-0.5	-0.25
	41.32	2.25	-0.25	-1.5	0	-0.5	-0.75	-1.5	1	-1.25			41.32	1.25	0.5	-0.25	-1.25	-0.25	0.25	0.5	0.75	-2
	41.36	1	-1	0	-0.25	-0.5	-0.25	-2	0.25	1			41.36	0	-1	0.5	-1.25	0.5	-0.5	0.75	1	-1.75
	41.4	1	-1.25	0.75	-0.75	0	0	-1.75	-1.5	1.25			41.4	1.5	-1	0	0.25	1	-1.5	1.25	-1.5	-1.25
	41.44	0.5	-1	0	-0.25	0.25	0	-2.25	-2.75	1			41.44	1.75	-1.75	-0.75	1.25	1	-1	-0.25	-2.75	-0.25
	41.48	-0.75	0	0.5	0.25	-0.25	-0.25	-2.75	-2	1.25			41.48	0.25	-1.5	0	2.25	-0.5	-0.75	-2	-3	-1
	41.52	-1.25	1.5	1	-1	-1.75	0	-1.75	-0.5	1			41.52	-0.5	1.5	0.75	2.25	-1.5	-0.25	-1.75	-1	-1.5
	41.56	-2.75	-1	1.5	-2.5	-2.25	1.75	-0.75	0	0			41.56	-3	1.75	0.5	-0.5	-1.75	1.25	1	0.25	0
	41.6	-1.5	-3.75	0.25	-2	-1.25	2.25	0.5	1.25	-1.5			41.6	-2.5	0	0.5	-1.75	-0.75	1.75	2.25	3	1.25
	41.64	0.25	-2.5	-0.5	0.25	0	1.75	1.75	1.75	-1.5			41.64	-0.25	-1.25	-0.25	0	-0.5	1.25	2	2.5	2.25
	41.68	0.5	-0.25	0.75	0.5	1.25	1.25	1.25	0.5	-0.75			41.68	0.75	-1.25	-0.5	1	0	0.25	2	1	1.25
	41.72	0.75	1.25	1.75	0	2.5	-1.25	-0.5	-0.5	0.25			41.72	1.25	0.75	0.25	-1.25	0.75	-1	0	0	0.25
	41.76	1	2.25	1.75	0.25	2	-3	-0.5	-1.25	0.5			41.76	1.75	2.5	1.25	-1.75	1	-1	-0.75	-1.5	0
	41.8	1	1	0.75	0.5	1.5	-3	0	-1	1			41.8	1.75	1.75	1.5	0	2	-0.75	0.25	-1.75	-1.25
	41.84	0	-0.5	-2	-0.5	0.5	-0.5	-0.75	0.5	0.75			41.84	1	1.25	0.25	1.25	1.5	-0.25	0.5	-0.5	-1
	41.88	-0.5	0.25	-1.75	-1.5	-1.25	-0.25	-1	1.75	0.75			41.88	0.75	0.5	-0.25	1.5	0	-1.5	-0.25	0.25	1
	41.92	0.5	0.25	-2.25	0	-0.5	-1.25	-0.25	0.75	-0.5			41.92	0.5	0.75	-1.5	2	-0.75	-0.5	-0.75	-0.5	0
	41.96	0.5	-1	-1.25	-0.25	1.5	-1.25	1.75	1	-1			41.96	0.5	1	-1.25	2.25	-0.75	-1.5	0.5	0	-0.25
	42	-0.75	-0.75	-0.25	-1.75	1.5	-0.75	2	-0.25	-0.75			42	0	-0.75	0	0.5	0	-2.25	0.75	-0.5	-0.25
	42.04	-0.25	-0.5	0	-2.25	1.25	-0.75	1.5	0.25	0.25			42.04	1	-1.25	1.75	-1	1.25	0	0	-0.75	0.75
	42.08	0.25	-0.75	-0.25	-1.5	0.25	-0.25	0.5	3	0.5			42.08	0.5	-0.5	2.25	-1	0.75	1.75	-0.75	0	1
	42.12	1	-0.5	-0.25	-0.25	-0.25	0.25	-0.5	4	1			42.12	-0.25	0.25	2.25	-0.25	0	1.5	-0.75	1.75	0
	42.16	0.25	-1.25	-1	1.75	-1.5	0.25	-0.75	3.25	1.75			42.16	-1.75	-0.75	1.5	0	-0.25	0	0.25	3.75	0.25
	42.2	-0.5	-1.25	-1.75	1	-1.75	-0.25	-1.25	0.5	2.25			42.2	-2	-0.25	0.75	1.5	1	-2	-0.5	3.75	0.5
	42.24	-0.25	0	-1.5	-0.25	-1.75	-0.25	-1	-0.5	1.5			42.24	-1.5	1.25	-0.25	1.5	0.25	-1.5	-1	2.25	-0.25
	42.28	1.25	-0.25	-0.75	-1	0	0	0.25	-1.5	-0.25			42.28	0.25	0.75	-0.75	1.25	-0.25	0.25	0	-0.25	0
	42.32	1.5	0.5	0.75	-1.75	1.25	0	0	-1.5	-1.75			42.32	0.75	0	-0.5	1	-0.5	1.25	0.5	-2.25	-0.5
	42.36	-0.25	0.25	-0.5	-4.25	-0.25	-0.25	-0.25	-1.5	-0.25			42.36	0	-1.25	-1	-1	0	-0.25	0.75	-2.75	-0.5
	42.4	0.5	0.25	0	-4	0	0.25	-0.75	-1	2			42.4	-0.5	-1	-0.25	-2.5	0.5	0	0.25	-1.75	0.75
	42.44	-0.25	1	1.75	-2	0.5	2.25	-1	0.5	1			42.44	-1	0.25	1.25	-0.75	0.5	1.75	-0.5	0	2
	42.48	-0.5	0.25	2.25	-0.25	0.25	1.75	-3	0	-1			42.48	0	1.5	1.25	1.25	0.5	2.75	-2	0	1
	42.52	0.25	0.25	2.75	1.25	0.5	0.75	-3.25	-1.25	-0.75			42.52	0.25	1.75	1.25	2.75	0.75	2.25	-1.25	-0.25	0.25
	42.56	0.25	0.5	2.25	0.5	1	0.25	-1.5	-0.75	-0.25			42.56	-0.25	1.25	0.25	1	1.75	1.25	-0.25	1	0.75
	42.6	0.5	0.75	2.25	0.5	0.5	-1.25	0.25	-1.5	-0.25			42.6	0.75	0.75	0.25	0.25	1.25	-0.75	0.25	-0.25	0.75
	42.64	-1	-0.5	1	0.75	1	-1.75	-0.25	-1	-0.25			42.64	0.25	-0.5	0	-1.5	0.5	-1.5	0.75	-0.5	0.5
	42.68	-1.75	-0.25	-0.75	1.5	1.25	-2.25	-0.75	-0.5	0.25			42.68	-0.5	0.25	0.5	-1.5	-0.25	-1.5	0.25	-0.5	0.25
	42.72	-0.5	2.5	-1	1.5	-0.5	-1.5	-0.5	-1	0			42.72	-0.25	0.75	0.75	-0.25	-1	-1	-0.5	0	0
	42.76	1.25	3.25	-0.25	0.75	-1.25	-2.25	0.75	-1	-1			42.76	-0.5	0.5	-0.25	1	0	-1.25	-0.25	0.25	-0.25
	42.8	1	-0.25	-0.5	-0.75	-1.75	-3	1.5	0.25	-1			42.8	-0.5	0.75	-1.75	0.75	-0.75	-0.75	0.5	0	-1.25
	42.84	-0.75	-3.25	0	-2.75	-1.5	-2.25	-0.5	2	-1.5			42.84	0	0.5	-0.25	-1	-3	-0.75	-0.75	0	-2
	42.88	-1	-3.25	-0.5	-0.25	-0.5	-1.75	-0.5	1.75	-1			42.88	1	-0.25	0	-0.5	-1.75	0	-0.5	0.25	-3
	42.92	0.5	-2	0	2.5	-0.75	0	-0.5	0	-0.5			42.92	0.75	-0.75	-1	0.5	0	0	0	0	-3
	42.96	0.75	0	0	0.75	-1	1	-1.25	-0.5	0			42.96	0.75	-1.75	-1.5	-1.5	0.75	0.25	-0.75	-2.25	-2.5
	43	1.25	0	0	-2.25	-0.75	1.75	-2	-1.5	-1.25			43	1.5	-1.5	-0.75	-3.5	-0.25	0.75	-1.5	-4.25	-1.75
	43.04	1.5	0	-0.75	-4	-1.75	0.75	-1	-2.5	-0.25			43.04	2.5	-1.25	-0.5	-2.5	-1.25	0	-0.75	-3	0
	43.08	1	0.25	-1.75	-2.75	-0.75	-1.25	1	-2	0.75			43.08	0.25	0	-0.75	0.25	0	-1.75	1.25	0	1.75
	43.12	0.75	1	-0.75	-1	-1.25	-1.25	2	-0.75	0			43.12	-1.25	2.25	1.5	1.75	-0.25	-2	1.75	3	1
	43.16	0.75	1	-0.25	0	-0.75	0.25	1.5	0.25	-0.25			43.16	0.5	3.75	3.75	0.75	-0.5	-1	0.75	3	-0.5
	43.2	0.5	-0.75	-0.25	0.25	0.5	2	0.5	1	0			43.2	0.5	2.5	2.5	0.25	-1.25	1	0.25	2.25	-2
	43.24	-1.25	-1.75	1.25	0.25	2.25	2.5	0	1	-0.25			43.24	-2	-0.25	1.5	0.5	0.25	1.25	1.5	1.25	-2
	43.28	-1.75	-1.75	3.75	0	1.75	0	0.5	-0.25	0			43.28	-1.5	-1.75	2.25	1.5	1.25	-0.75	1.5	-0.25	0.25
	43.32	-3	-1	3	0.25	0.5	-1.5	0	-1.75	-0.25			43.32	0.25	-2.25	3	0.5	0.5	-1	-0.5	-1	0
	43.36	-2	-0.5	-0.5	0.25	0	-2	-0.75	-2.75	0			43.36	1.5	-2	1.5	0.25	-0.75	-1.25	-1.75	-3	0.5
	43.4	0	-1	-3	-1.25	-0.25	-2.25	-1.75	-1.25	1			43.4	1	-0.75	-0.5	-0.5	-0.5	-0.5	-0.5	-1.75	0.5
	43.44	0.25	0.25	-2.25	-1.5	0.5	-0.75	-0.5	1	0.75			43.44	-0.75	0.75	-0.75	0	0.25	0.25	2	1.25	0
	43.48	1.25	1.25	-1	-0.75	1	1	0.25	2.5	-0.75			43.48	-1.75	0	-0.5	1	0.25	0.25	0.75	2.5	-0.5
	43.52	1.5	2	-0.5	-0.75	1	1.25	1	2	0			43.52	-1.25	-0.25	-0.25	-0.25	1.25	0.5	-1	2	-0.75
	43.56	1.75	0.5	-1.75	0.5	-1	0.75	0.75	0.5	0.5			43.56	1	0.25	-2	-0.5	1.25	1.25	-1.25	0.25	-0.75
	43.6	1	-1.25	-1.5	0.25	-1.25	-1.75	-0.25	0	0.5			43.6	1.25	-0.25	-1.5	-0.75	0.75	1.25	-1	-1.5	-1.5
	43.64	-0.25	0.25	0.25	-2.5	-0.5	-3.75	1	0	0.5			43.64	-0.25	0.75	1	-2	-0.5	-0.25	1	-1.25	-1.25
	43.68	-2	0.5	1	-1.5	0.5	-2.5	2	-1.25	0			43.68	-0.5	1	1	-0.25	-1	0	1.5	-1.25	-0.75
	43.72	-3.25	-0.75	1.25	0.25	0.5	-1.5	0.75	-1.75	-1.75			43.72	-0.25	1	1	0.5	-1	0	1	0.25	0
	43.76	-2.25	-1	1.5	1	-0.25	-1.25	-2.5	0	-2.25			43.76	-0.75	1.25	2	0.25	-0.75	0	0	1.75	1
	43.8	0.75	-0.75	1.5	1	-0.5	-0.5	-3.25	-0.25	-2.25			43.8	0.5	1.25	2.5	-0.75	-0.5	0.75	-0.25	-0.75	1
	43.84	1.5	-1	0.75	0.75	0.25	0.5	-2.5	0.25	-1.75			43.84	0.75	-0.25	1.5	-2	-1	1.75	0.25	-1.75	1.5
	43.88	-0.5	-1.5	0.5	0.5	0.75	1	-1	1.5	-0.5			43.88	-1	-1.75	-0.75	-1.25	0	0.25	-1.5	0.25	1.25
	43.92	-1.5	0.5	0.75	0.25	1.25	0.5	-1.5	-0.25	1.5			43.92	-2.75	-0.5	-0.25	1.25	1.5	-2.5	-2.25	-1	1.25
	43.96	0.25	1.5	1	-1.25	2	1	-0.75	-0.25	1.5			43.96	-2.75	0	-0.25	1.5	2.5	-2.5	-0.5	-1.75	0.75
	44	1.25	2.25	-1.25	-2.25	-0.25	0.5	0	-0.25	1.75			44	0	0	-0.5	0.5	1.25	-0.75	0.5	-1.5	1
	44.04	1.5	1.5	-2.75	-1.75	-1.25	-0.25	0.25	0.25	0.75			44.04	2.75	0.5	-0.5	0	0.5	0.75	0.75	0	1.25
	44.08	2.25	-0.25	-1.75	-1.5	0.5	-0.25	-0.75	0.75	-1.25			44.08	3	1.5	-1	-1.25	2.25	0.5	0	1.75	0.5
	44.12	1.5	-1.5	-0.75	-1.25	1.75	-1.25	-1	0.75	-1.5			44.12	2	1	-1	-1.25	2	-1	0	2.25	-0.25
	44.16	0.25	-1.5	0	-1.5	0	-1	0.25	0.25	-0.5			44.16	1.25	-1.25	-0.5	0.5	-1	-1.75	0.5	1.5	-0.25
	44.2	-1	-2.5	0.25	-1.5	-0.5	-0.5	1.25	-1	-0.25			44.2	0.25	-3	-0.75	0	-1.75	-1	0.75	0.25	-1
	44.24	-0.75	-3.5	-0.25	-1.5	-1	-0.25	1.25	-1	-0.25			44.24	-1.25	-3.75	-1.25	0	-1	0.5	0	-0.5	-0.5
	44.28	-0.75	-2.5	0.5	0.25	-1.25	0.5	2	1	-0.75			44.28	-3.25	-3	-0.5	0.5	-0.5	1.75	-0.75	0.5	-2.25
	44.32	-1.5	-0.5	2	1.5	0.25	0.5	2.5	2.25	0.25			44.32	-2.75	-0.75	0.75	2	-1	0.75	0.25	-0.25	-3
	44.36	-0.75	2.25	1.5	1.25	1	0	1.5	1	1.5			44.36	0.25	2.75	0	1.25	-0.5	0	0.25	-1.75	-0.25
	44.4	-0.75	2.75	1.5	0.5	-0.75	-0.75	0.75	-1.5	0.25			44.4	1.75	3.25	0.75	0	-0.5	-0.5	0.25	-2.75	2.25
	44.44	-0.25	-0.5	2	1	-1.25	-1.25	0	-2	-2.25			44.44	2.75	0.75	2	0.75	0	-0.5	0.75	-1	1.5
	44.48	0	-2.25	1.25	0.75	0	-0.5	-2.25	-1.25	-1.5			44.48	2.25	-1.5	0.5	1.5	2	0.25	0	1.25	1
	44.52	1.25	-1.5	0	-0.25	1.5	-0.25	-2.25	0.5	-0.5			44.52	1.5	-1.25	-0.75	0.75	2.5	-0.25	-1.5	1.25	0
	44.56	1.5	0.75	-0.75	-0.5	1.5	0.25	-1.75	0.5	1.5			44.56	0.75	1.75	0	-1.25	1.25	0.25	-2.5	0.5	0.25
	44.6	0.75	2.25	0	0.5	0.25	0.75	-0.75	0.5	1.25			44.6	-0.5	2.75	1	-0.5	0.25	0.75	-1.75	0.5	-1
	44.64	0	3	1.25	0.75	0.25	0.5	-0.5	1.75	0.75			44.64	-1.25	2.25	1.75	0.25	-1.25	-0.25	-0.5	0.75	-1.75
	44.68	0.25	1.75	2	-0.25	-0.25	0	-0.5	1	1			44.68	-0.75	0	2.5	0	-2	-1	-0.25	0.25	-1
	44.72	1.25	0	2.25	0.75	-1.5	-1	0.5	0.5	0.75			44.72	0.75	-1.25	2.75	-0.25	-2.75	-0.75	0	1.25	-1
	44.76	1	-0.75	1.5	1.5	-1.5	-0.5	0.25	0	-0.75			44.76	0.5	-2	1	-0.75	-1	0.25	-0.5	1	-1.5
	44.8	0.25	-0.5	0.75	0.25	-0.25	-0.25	-1.25	0	-1.25			44.8	-1	-1.75	0.25	-0.25	0.5	0.75	-0.5	-0.5	-1.25
	44.84	-0.5	0.5	-1	0	1.5	-0.25	-1.5	0	0.75			44.84	-1.5	0	-0.5	0.75	1.5	0.25	0.25	-1	0
	44.88	-1.25	0	-2.25	-1.25	2.25	0.75	0.75	-1.25	3.25			44.88	-1	1	-0.75	0	1	0.25	0.75	-2	0.75
	44.92	-1	-1.25	-1	-0.75	2	0.75	1	-0.5	2.5			44.92	0.5	0.5	-0.25	0	0.75	0.75	1	-1	-0.75
	44.96	-0.25	-1	-0.5	-0.25	1.25	0.25	0.25	1	2.25			44.96	1.75	0	0	0.75	0.25	0.25	1.5	0	-0.75
	45	-0.5	-0.25	0.5	-1.25	0.5	-0.25	-0.25	1.25	2			45	0	-0.25	0.5	0.5	-1	0.25	1.75	1	0
	45.04	0	0	0.25	-2	0.5	-0.75	0.25	0.75	0.25			45.04	-0.75	-0.75	-0.75	-0.75	-1.5	0.25	0.25	-0.75	0.25
	45.08	0.25	0.25	0	-2.25	0.5	-1.75	-1	-0.25	-1			45.08	-1.25	1	-0.25	-2	0.5	-0.25	-2.25	-2.25	0.75
	45.12	-0.25	-0.5	-0.25	-1.25	0	-1.75	-0.25	-1.5	-1.5			45.12	-0.5	0.75	1.25	-1.75	1.75	-0.75	-2	-1.25	1
	45.16	0.25	-0.25	-0.75	0.25	0.25	-0.75	-0.25	0	-0.5			45.16	0	1	1.75	-0.5	1.5	-0.75	-0.25	1.25	0.5
	45.2	0.5	0.5	0.5	1.75	0.25	1.5	-1.25	1	-0.25			45.2	0.25	1.25	2	0.5	0.5	-0.75	-0.25	2.75	-0.5
	45.24	0.5	1.5	2	1.25	0	2.25	-1.5	0	0.75			45.24	-1.25	1.5	0.75	0.25	-0.25	-1.75	-0.75	1.25	0.5
	45.28	-1.25	0.75	0.75	1	-1	2	0.5	-0.5	0.75			45.28	-2.25	1.5	-1.25	0.25	-0.5	-1.5	-0.25	0	1.25
	45.32	-1.5	-0.5	0.25	-0.5	-2.25	0.25	2.25	-0.25	1.25			45.32	-2.25	0	-2	-1.5	-0.25	-1.25	0	0	2.5
	45.36	1.25	-1.25	0.25	1	-0.25	-0.5	2	0.25	1.5			45.36	-0.25	-1.25	-0.5	-0.75	1	-0.75	0.5	0.75	2.75
	45.4	3.25	-0.25	1	0.5	1.5	-0.25	-1	0.75	2.25			45.4	1.5	-1.25	0.75	0	1	2	-1	-0.25	1.5
	45.44	1.5	0.25	0.5	-0.25	1.25	0	-1.75	1.25	1.25			45.44	0.5	-1.25	0.25	-0.75	0	3	-1.75	-1	-0.5
	45.48	-1.5	0.25	0.5	-1	0	0.5	1	2.5	-0.75			45.48	-1.25	-2	-0.5	0	-0.25	1.75	0.5	-0.75	-2
	45.52	-3.25	0.25	1.5	-0.25	0	1.5	2.5	0.5	-1.25			45.52	-1.75	-2	-0.25	1.5	-0.25	-0.25	1.5	-0.5	-1.75
	45.56	-2.25	0.75	2.75	0.5	1	1	0.5	-1.25	-0.25			45.56	0	-1	1	0.5	0.5	-0.75	0.75	0.25	-1.25
	45.6	1.25	1.75	1	-1	0.75	0	-2.5	1	-0.5			45.6	2.75	0.25	0.5	-1.25	0.5	-1	-0.5	1	-0.25
	45.64	3.5	1.25	-1.25	-0.5	0.5	-0.5	-2.25	1	-0.5			45.64	4.5	0.5	-1.75	-0.5	0	-0.25	-0.25	-0.75	0.25
	45.68	2.5	0.25	-0.75	0.5	0	-1.25	0.25	-0.25	0.25			45.68	2	-0.75	-1.5	0.75	-0.25	-1.5	0	-1	0.25
	45.72	1.75	0.5	-0.75	1	-0.5	-0.75	1.5	0.25	-0.5			45.72	0	-0.5	0.25	0	-1.25	-0.75	-1.25	0.25	0
	45.76	1	1.5	-0.5	1.25	-0.25	0	0.25	1.75	-1.75			45.76	-0.75	1.25	0.25	0.5	-1.5	0	-0.25	1.5	0.25
	45.8	1.5	1	1	0	-0.5	1.25	1.25	1.25	-0.75			45.8	-0.25	1	0	0.5	0	2	1.5	0.25	0.75
	45.84	1	-0.75	1.75	-0.5	0.25	0.25	2.75	0.25	1.5			45.84	-0.25	-0.25	0.5	-0.75	2	2.5	2.5	-1	0.25
	45.88	0.25	-1	1.5	0.25	1	-1.25	2.75	-1	2.25			45.88	0.25	-1.25	1.25	-1.75	1.5	0.75	3	-2	0
	45.92	0.25	-1	0.25	1.25	2	-1.5	1.5	-2.5	0			45.92	0.75	0.25	2	0.5	1	-1.75	2	-2.75	-2
	45.96	0.25	-1.25	-0.25	1.25	1.5	-1.5	0	0.5	-1			45.96	1	1.75	1.75	2.25	0	-2.75	-0.25	-0.75	-2.5
	46	0.75	-0.75	1.25	0.25	1.5	0	-1.5	1.75	0.5			46	2.25	1.25	3	1.25	-1.25	-1	-1.5	0.25	-1
	46.04	0.5	2.25	2.75	-0.75	1	1.25	-1.75	-1	1			46.04	1.5	1.75	3.25	0	-1.25	-0.25	-0.5	-0.75	-0.75
	46.08	-0.5	3.25	2.25	-0.25	0.75	2	-2.25	-1.5	0.75			46.08	0	1.75	2.75	-0.5	-1	0.25	-0.25	0.25	0
	46.12	-2.5	1.25	0.25	-0.75	0.5	1	-1	-0.5	0			46.12	-2	0	-0.5	-0.75	-1.75	0.25	-0.25	0.5	0.5
	46.16	-2.25	-0.75	-1.5	-1	-1	0.5	1	0.25	0			46.16	-2.75	-1.5	-2.75	-0.75	-2.75	0	0.75	0.5	-0.25
	46.2	-0.5	-0.25	-0.75	-1.25	-2.25	1	0.5	1.5	0			46.2	-1	-2.5	-2	-1.75	-1.75	0	0.5	1.25	-1
	46.24	-0.5	-1	0	-1	-1.5	1.25	-0.5	2.25	0.25			46.24	-0.5	-3.75	0	-1.25	-0.25	0.25	-0.75	1	0.25
	46.28	0.75	-0.75	0	-1.25	1.25	0	0.5	2.75	0.25			46.28	0	-3	0.75	0	2.25	0.5	0	1	0.5
	46.32	2.25	0.5	-0.25	-1	2	-1.5	1	1.5	1.5			46.32	0.25	-0.75	0.25	-0.5	3	1.25	1.5	1.5	1.5
	46.36	3	1.25	-0.25	-1	2.25	-1.75	0	1.75	2			46.36	0.5	1.5	-1.25	-1.25	3	1.5	0.5	1.5	0.5
	46.4	2.5	0.75	-0.75	-0.25	1	-0.25	-0.75	2.25	3			46.4	0.75	2	-0.75	-1	1.75	0.25	0	0.25	0.5
	46.44	1.25	-0.25	-1	2.25	-2.25	1.5	-1.25	1.75	1.75			46.44	0.5	0.75	1.5	1.25	-1.25	-2	0.25	0	0.25
	46.48	0.75	0	0.25	3.5	-1.5	1	-0.25	0	-0.25			46.48	0.75	-0.25	2.5	3.25	-1.25	-1.75	0.75	-0.75	-0.5
	46.52	1.25	0.75	1.75	2	0.5	-0.5	1.75	-0.75	0.5			46.52	1.25	0	1.75	2.75	-0.25	-0.25	1.25	-0.75	-0.25
	46.56	2.5	0.25	1.5	-0.25	1.25	-0.5	2.75	0.75	1			46.56	2.25	0.25	0.75	-0.25	0.25	1.25	1.25	1.5	1
	46.6	3.25	-1.5	0.75	0.25	0.25	0.75	2.25	2	1.5			46.6	1.75	-0.25	-0.25	-1	0.25	1.5	-0.5	2.75	1.5
	46.64	2.25	-0.5	1.25	-0.25	0.5	0.5	0.25	1.5	0.75			46.64	0.5	-1	-1	-0.25	0.25	0.5	-2.5	3.5	0
	46.68	1.75	0	0.5	-0.5	2	0	-0.5	0.75	-1			46.68	1	-0.75	-1.5	-0.5	-0.25	-1	-2.25	1	0.25
	46.72	2.25	-0.25	1	0	2	-0.25	1	0.25	-1.5			46.72	1.75	0	-0.75	0	-0.5	-1	0.5	-0.75	0.75
	46.76	1	1.25	2.75	0.75	2.25	-0.25	2	0.25	-2.5			46.76	1	1.75	0	0.5	0	0	1.75	-1	0.5
	46.8	-1	1.25	2.5	1	2.25	-1	2.25	0.5	-1.75			46.8	0.5	2	-0.25	-0.25	0.5	0	2.25	-1.5	0
	46.84	-0.75	1	1.75	1	2.25	-0.75	2	0.75	1			46.84	0.25	1.5	0.5	0.25	0.75	-0.5	2	-1.25	0.5
	46.88	0.5	1.25	1.25	0.75	-0.5	0.5	1.25	-0.75	1.75			46.88	0	2.25	0.75	0.75	-0.25	0.25	0.75	-2.25	-0.5
	46.92	0.75	2	1.25	1	-2.75	1	-1.25	-2	0.75			46.92	-0.75	1.5	0	1.75	-1	-0.5	-1.25	-3	-1
	46.96	-0.5	2.75	1	1.25	-1.25	1	-1	-0.5	0.75			46.96	-1.5	1.75	0.5	1	-0.25	-1	-2.25	-1	-1
	47	-1.5	1	1.5	1.25	1.5	0.75	-0.25	0.25	2.25			47	-1.75	1.25	1.5	0	1.5	-1	-1.5	0.5	-0.5
	47.04	-0.75	1	1.75	0.25	2.5	1	0	-0.75	3.75			47.04	-2.5	1	0.75	-1.75	1.75	-1	-0.75	0	0.75
	47.08	0.75	1.5	0.75	0.25	1	1.25	0.75	-0.25	3.5			47.08	-1	0.75	-0.25	-2.25	2.25	-1.25	-0.25	-0.25	0.75
	47.12	3.25	1.25	-0.25	0.75	-1	0.75	1.5	2	2			47.12	1.25	-0.75	-0.75	-2	1.75	-0.75	-0.25	1	-0.25
	47.16	3.25	1.75	0	0.25	-2	-0.5	1	1.25	0.25			47.16	1.25	-0.5	0	-0.75	-1.25	0	-1	0.5	-1.75
	47.2	1	1	0.5	0.75	-0.5	0	0	-0.75	-0.5			47.2	1	-0.75	2	1	-2	2	-0.5	-1	-1.5
	47.24	-0.25	-1.5	0.75	0.5	1.25	-1	-0.5	-0.75	-0.25			47.24	0.75	-2	2.25	1	-0.25	0.75	-0.75	-1.25	-0.25
	47.28	0.75	-3	0.5	-1	1.75	-1.25	-1	-1	-0.25			47.28	1.5	-3.5	1.25	0.5	0.75	-1.25	-1	-1.25	0
	47.32	0.75	-1.75	0.25	-1.25	0.5	-0.5	-1	-1	-2			47.32	1	-3.5	1	0.25	0.75	-0.25	-0.75	-1.5	0
	47.36	0.25	-0.25	0.5	1	0	0	-0.25	-0.75	-2.5			47.36	-0.25	-1.75	1.5	0.75	-0.5	0.25	0.25	-1.25	0.5
	47.4	-0.5	0.5	-0.5	2	-1	1.25	0.5	-0.25	-0.75			47.4	-1	0.75	-0.5	1	-1.25	1.25	1.75	-0.5	0.5
	47.44	-1	1.25	0	0	-0.75	0.25	0	1.5	0.25			47.44	-1.25	3.25	-0.75	1	-1.5	0.25	1.25	0.5	0.75
	47.48	0	0.5	1.25	-0.25	1	0.25	-0.5	3.25	0.5			47.48	0.25	2.75	0.5	1.5	-0.75	0.5	0.25	1	-1.25
	47.52	1.25	-0.25	1.75	-0.25	0.5	0.75	0.25	2.5	-0.5			47.52	1.25	0.5	0	0.25	-0.75	2.25	-0.75	-0.25	-1.5
	47.56	3	-0.25	0.5	0.75	0.5	1.5	0.25	0.25	-0.5			47.56	1.25	-0.5	-0.75	-0.5	-0.25	3.25	-0.5	-0.75	0
	47.6	3.5	0	0.25	1	1.5	1.5	0	0	0			47.6	1.25	-0.5	-0.75	0.75	0.25	1.5	-0.25	0	1.75
	47.64	1.75	0	1	0.25	2.25	2.25	0.25	0.75	-0.75			47.64	1.75	0.25	0.5	0.5	0.75	0	0.25	0.75	0.5
	47.68	-0.5	1	-0.5	0	2	3	2.5	1.25	0.75			47.68	1	1.75	-1	0	0.25	0.5	1.75	0.5	0.5
	47.72	-1.5	2.75	-0.75	0	1.75	2.5	1.5	0.5	3.25			47.72	-1	2.75	-1.25	-1.25	0.25	0.75	1	0.25	1.5
	47.76	-0.5	1.5	-1.25	-0.5	1	1.5	1.5	-0.5	2.25			47.76	-2	2	-1.5	-2.25	-1	1.25	1	0.75	-0.25
	47.8	1.5	-1.25	-1.25	-1.5	1.25	0.25	2	-1	1			47.8	-1	-0.5	0.25	-1.75	1.5	-0.25	1.75	0.5	-0.25
	47.84	2	-4	0.25	-1.5	0	-1	0.75	0.5	1			47.84	1.75	-3	1	-0.25	1.5	-1.75	1	-0.75	1.25
	47.88	1.5	-4.25	0.75	-0.5	-1.25	0	-1.5	1.25	1.5			47.88	1.75	-2.75	0.5	0	0.75	-2	-1	-0.75	0.75
	47.92	0.25	-1.5	0.25	0	0.5	-0.25	-1.25	0	2			47.92	0.75	-0.5	0.5	0.25	1.25	-2	-2	1.25	0.5
	47.96	-1	1.75	-1.25	0.75	0.25	-0.75	-1.25	-1	1			47.96	0.5	0.5	0	0.5	0	-0.5	-2.25	2	-0.25
	48	-0.75	2.25	-3	0	-0.5	-1.25	-1.5	-0.25	0			48	1.5	-0.25	-3.5	0.25	-1	0.75	-1.25	0.75	-0.75
	48.04	-0.75	2.5	-1	0.25	-0.25	-0.75	0	1.25	0.5			48.04	0.25	-0.25	-3.5	-0.25	-1.75	0.75	-0.25	1.25	-0.5
	48.08	1	2.25	0.25	1	1	-0.25	2.25	2.5	0			48.08	0.25	-0.25	-1.25	-1	-1.75	0	0.25	2	-1.75
	48.12	2.75	0.75	0.75	0.25	1.5	-0.5	1.75	1.25	-0.5			48.12	-0.75	-0.5	-0.25	-2.25	-1.5	-0.75	0.75	0.75	-2.5
	48.16	3	-0.5	1.75	0	1	-0.75	-0.25	-1.25	1			48.16	-1.25	-1.5	1.5	-2	-2.5	0.25	0.25	-1	0
	48.2	1	0	2	-0.75	0.5	-0.5	-1.75	-1.25	0.5			48.2	-1.25	-0.75	2.5	-1.75	-1.5	0	0.75	-0.75	1.5
	48.24	-1	2.5	2	-0.25	1.25	-0.25	0	-0.25	-0.75			48.24	0	2	1.25	-1	1.5	-0.25	1.75	-0.25	0
	48.28	-0.75	2.75	2	1.75	1.5	-0.25	0.25	-0.5	-1			48.28	-0.5	2.5	1	2.5	2.25	-1.25	0.5	-1.75	-1.75
	48.32	0.5	1.25	2.5	2.5	1	-1	0.25	0.25	0.75			48.32	0.25	1	1.25	3.75	1.5	-0.25	-1	-2.25	-2.25
	48.36	1.5	0.5	3.25	0.5	0.75	-0.5	1.25	1	1.5			48.36	1	0.25	0.5	1.75	0.75	1.25	0.5	-1.5	-1
	48.4	0.25	0.75	3.5	-0.5	1.75	0.25	0	0.75	2			48.4	1.5	-1.5	1.25	0.5	1.25	2	0	0.75	1.5
	48.44	0	-0.5	4	0.5	1.5	1	-1.5	1.5	1.75			48.44	0.5	-1.75	2.5	1.5	1	1.5	-1.75	0.75	2
	48.48	0.5	-2.5	2.75	1.25	0.25	0.25	-2.25	0.25	1			48.48	-0.75	-1.75	2	2	0.75	-0.5	-2.5	-0.25	1.25
	48.52	0.75	-2.75	1	0.5	-2	-2	-2.25	1	0.5			48.52	-0.75	-2	0.25	0	-0.25	-2.75	-2.5	1	0.25
	48.56	0.25	-0.75	-0.75	-1	-2.5	-1.25	-0.75	1.75	0.75			48.56	0.25	-0.25	0	-1.5	-0.25	-2.25	-1	1.25	0
	48.6	0.5	0.75	-1	-1.25	-0.25	0.5	-0.25	1.5	0			48.6	2	-0.5	0.5	-0.75	0.5	-1.25	-1	0	-0.75
	48.64	0.5	1.25	-0.5	-0.25	2	0.5	-0.25	-1	-1.5			48.64	1.75	-0.75	0	-0.25	0.75	-0.75	1	-1	-1.75
	48.68	0	1	0	-0.25	1	0.75	0	-2.5	-1			48.68	-0.25	-1.25	-0.5	0.25	-0.75	1.75	1.25	-0.25	-0.75
	48.72	2	1	0	-0.25	-0.75	0.75	0.25	-3.5	0.5			48.72	-0.75	-0.25	-1.75	0.5	-1.75	2.75	0.75	-0.75	2
	48.76	2.5	0.5	0	1.25	1	0	0.25	-1.5	-0.25			48.76	-0.75	0.25	-2.5	0.5	-0.75	0.75	0.5	-1.5	1
	48.8	2.25	-0.5	-0.5	2	1.25	0.75	0	0.75	-1.25			48.8	-0.25	1	-2	0.5	-0.5	-0.25	0	-0.5	0.25
	48.84	0.75	-1.75	-1	2	0.25	1.5	0.75	1.75	-2			48.84	0	-1.5	-2.25	1	0	0.5	-0.25	0.25	0.25
	48.88	0.25	-0.25	0.25	0.25	-1	0.5	-0.25	1	-0.75			48.88	0	-1.75	-1	-0.5	-1.25	-1	-0.25	0.25	-0.25
	48.92	0.5	1	1.5	-1.75	-1.25	0.5	-0.75	0	0			48.92	-0.25	0	1.25	-3.75	-1.75	-1.75	0	0.5	-0.5
	48.96	0.25	1	2	-1.5	-0.75	0	-0.25	-0.75	-0.25			48.96	-1.25	1.25	2.5	-2.25	-1.25	-1	0.5	0.75	-1.5
	49	0	0	3	0	-1.25	-0.75	-0.5	-0.25	-0.75			49	-1	0.75	2	0.75	-1.5	-0.75	0	0.25	-1.75
	49.04	0.5	-1.25	1.5	0.25	-0.5	-0.5	-1	0	-0.5			49.04	-1.25	-0.75	0.75	1	0.25	-1.75	-0.75	-0.5	-0.75
	49.08	0.25	-1.25	-0.5	0.5	0.75	-0.5	-1	1	-0.75			49.08	-0.75	-1	-1	0.25	1.5	-2.75	-0.75	0.25	-1
	49.12	-0.25	-0.25	-2	1.5	1.25	-1	0.25	1.5	0			49.12	-0.5	-0.5	-1.75	0	1.5	-2.5	0.5	0.75	-2
	49.16	-0.25	2.25	0	0	1.25	-0.5	0	1	1.25			49.16	0.25	1	-0.25	-1.25	2.5	-1	0	-0.25	-2.25
	49.2	0	2.25	1.75	-0.5	0.75	-0.75	-1	0.5	1.75			49.2	-0.5	1.5	0.75	-1	2.5	-0.25	-0.25	-0.75	0.5
	49.24	0	0	1.25	0	-1.5	-0.75	-1.5	0.75	1			49.24	-1.5	0.5	0	0.75	0.5	0.75	-0.5	-1	0.25
	49.28	-0.5	-0.25	0.5	-0.75	-0.5	0.5	-1.5	1	0.5			49.28	-2.75	1.25	-0.25	1	1.25	0.75	-1	-0.75	-0.5
	49.32	-0.5	0.5	0.5	-1.25	1.5	0.25	0	0.5	-0.25			49.32	-1.25	1.5	-0.25	0	1.25	0.25	0	0	-1.25
	49.36	-0.25	1	0.25	-2.75	1.75	0.75	-0.75	-0.25	0			49.36	0.5	1	-1.75	-1.75	0.25	2.25	0.5	2.25	-1.75
	49.4	-0.75	1	-0.75	-3.5	-0.5	1	-1.5	0.5	0			49.4	0.75	0.75	-2.75	-2.75	-1.25	2.5	-1	4.25	-1
	49.44	-0.75	0	-1.75	-2	-2	0	0	0.5	-0.75			49.44	1	-0.5	-1.5	-0.25	-2.5	1.25	-1.75	4	-0.75
	49.48	0.5	0	-1.5	0.25	-2.25	-1.5	1.25	-1	-1			49.48	1	-1.25	0.75	1.5	-3.5	-0.5	-0.5	0.75	-0.25
	49.52	0.5	0.75	-2	0.25	-1.5	-2.25	1	-0.5	-1			49.52	-0.25	0.25	1.5	1.75	-3	-1.25	-0.25	-1.5	-0.25
	49.56	0.5	2	-2.5	-1	-1	0	0.75	-0.5	0			49.56	-0.5	2	0	1	-1.5	0.5	-0.75	-1.25	0.5
	49.6	0.75	2	-0.25	-2	-1	2.25	0.75	-0.25	1			49.6	-0.5	1.75	0.5	-1	-1.5	0.75	0.5	-0.5	2.75
	49.64	0.75	0.5	1	-1	0	3	1	-0.25	1.5			49.64	0	0.25	1.25	-1.75	-1	0.75	2.5	-0.5	4
	49.68	2	-1.75	1.5	0.75	1.25	0.75	0.75	-0.25	0.5			49.68	0.75	-1.75	1.75	-0.5	0.75	-0.5	2.75	-2	2.75
	49.72	2.25	-1	0.5	1.75	1	-0.75	-1.5	-0.5	0.25			49.72	0	-1.25	1.25	1	1.5	-0.75	1.75	-2.25	0.5
	49.76	0.75	-0.75	-1.25	0.75	-0.25	-1.25	-1.75	-0.75	0.25			49.76	0.25	-0.5	-0.5	2.25	1.75	-0.25	0.25	-1.5	-1.25
	49.8	0.5	-1.5	-0.25	0.25	-1.75	-1.5	0	-0.75	-1.25			49.8	1	-1	0	1	2.25	-0.75	0	-0.5	-1.75
	49.84	0	0.5	1.25	1.5	-2.25	-0.25	0.5	-0.25	-1			49.84	0.5	-1.25	1.5	1	1	0.25	0.25	0.25	-0.25
	49.88	0	1.25	1.75	2.25	-1.25	0	0.75	0.75	-1.25			49.88	-0.25	-0.5	2.75	1	-0.75	0.5	1.25	-0.5	-1.25
	49.92	0	-0.5	1.75	1	0	-1	-0.25	0.25	-1.25			49.92	-1.5	0.25	2	0	-0.5	-0.75	0.5	-1.5	-0.5
	49.96	-1.25	-2.5	0.75	0.25	1	-1.75	-0.75	0	-1.25			49.96	-2	-1.25	0	-0.25	1	-1	-1.5	-0.5	0
	50	0	-0.25	0.25	0	0.75	-1.5	-1	0.5	-1.5			50	-0.5	-0.5	-0.75	-0.25	0.25	-1.5	-2.5	1.25	-0.75
	50.04	0.75	1	0	0.5	1.25	0.25	-1	0	-0.5			50.04	1.25	-0.25	-1.75	-0.25	-0.5	-0.75	-2.25	3.25	-0.5
	50.08	0.25	0	0.25	0.25	2	2.75	-0.25	-0.25	0.75			50.08	1	-1.25	-2.5	0.25	-0.75	2.25	-0.75	2.5	0.5
	50.12	-2	-0.5	1.25	-1.25	0.75	3	-1.5	-0.25	1.75			50.12	-1	-0.25	-2	1	-1	2.25	-2	-0.75	1.5
	50.16	-1.75	-1.25	2	-1	0	1	-1.5	0.25	2.25			50.16	-0.75	-0.5	-1.5	1.5	-0.25	-0.5	-1.75	-1.5	2.5
	50.2	0.75	-0.75	1	-1	-0.5	-0.25	-0.75	0.75	0.5			50.2	0.5	0.25	-0.25	0.25	0.75	-2	0.5	-0.25	0.5
	50.24	1.25	-0.25	0.25	-2.25	-0.5	1	-0.5	1.5	0			50.24	0.25	0.25	2.25	-1.75	2.25	-1.5	2	0.5	-0.75
	50.28	1.5	0.75	-0.5	-2.75	-0.25	-0.5	0.5	2	0.5			50.28	0	0	1.5	-1.75	1.25	-1	2	-0.5	-0.25
	50.32	1.5	1	-0.75	-1.5	-0.5	-3	1.5	2	0.75			50.32	0.75	-1.5	0.75	-1	-0.25	-1	0.5	-1	-0.75
	50.36	0.5	2.25	-0.5	-0.5	0.25	-3	1.5	1.5	0.5			50.36	0	-1	0.25	-0.5	0.5	0.5	-0.75	-0.5	-0.5
	50.4	-0.5	1.25	-0.5	1	0.5	-2.5	-0.5	-0.5	0.5			50.4	-1.25	-0.25	-0.5	0.5	1.25	1	-2.25	-1	0
	50.44	1.75	-3	-0.5	2	-0.5	-1.5	-2.75	-1.75	-0.25			50.44	-0.25	-1.75	0	1.5	0	0	-2.25	-1	0.5
	50.48	1.75	-3.5	0	1.25	-0.5	-0.5	-4	-0.5	-1			50.48	-0.25	-1	1	1.5	-1.5	-0.5	-2	1.5	0.75
	50.52	-0.75	-3	-0.5	-0.25	-0.25	0	-2.75	0.5	-0.75			50.52	-1.25	-0.25	1.75	0	-1.75	-0.75	-1.25	2.75	0.5
	50.56	-1.25	-2	-1.5	-1.25	0.25	1	-1.75	2	0.75			50.56	-1.5	-0.75	0.5	-1.5	-1.25	-1.25	-0.75	3.75	-0.25
	50.6	0.5	0.5	-1.5	-1.5	-0.25	1.75	-1.5	3	2			50.6	0	-1	0.25	-1.5	-0.5	-0.5	-0.75	3	-1.5
	50.64	2.75	1.75	0.5	0.25	0.25	1.25	0.25	2	2.5			50.64	0.5	0.25	1	-0.25	0.25	0.25	1	0.5	-0.25
	50.68	3	1.75	1	1	0.75	1.5	1.5	1.75	2.25			50.68	1	1.25	0.5	0.5	-0.75	0.5	3	-1.5	0.5
	50.72	1.5	0	-0.75	0.25	1	-0.25	1	-0.25	0.75			50.72	0.5	-0.25	-1.5	0.5	-2.25	0.25	1.5	-1.75	-1.5
	50.76	-0.5	0.5	0.5	0	0.25	-1.25	1.25	-2.25	-1.25			50.76	-0.5	-1.25	-1.5	0	-1.75	0.75	1	-2.25	-0.25
	50.8	-1.5	0.75	0.75	1.5	0	-2	1.5	-1.5	-2.25			50.8	-0.5	-2	-1.5	0.25	0	0.5	-0.25	-2	-0.25
	50.84	-0.25	0.25	1	1.5	-0.25	-1.75	1.5	1	-2			50.84	1	-1	-1	0.25	1	-0.5	0.25	-1	-0.25
	50.88	0.25	-1	0.25	-1.25	0	-0.75	0.75	2	-1.25			50.88	1	-1	-1.75	-0.75	0.5	-1.25	1.25	-0.5	0.25
	50.92	-1	0.5	1	-2.75	0	-0.5	2	1.5	0.25			50.92	0	-0.25	-0.5	-1.25	0	-1.5	1.25	0.25	2.75
	50.96	-1.5	0	2	-2	0.5	-0.75	1.5	0	-0.5			50.96	-0.75	0	1.5	-1.25	0.5	-0.5	0.5	0	2
	51	-1	-1.5	1	-1	1	0.75	0	-1.75	-1			51	-0.5	0.75	1.75	-0.75	0.75	1.5	-1.5	0.25	0.5
	51.04	-1	-1	-0.75	-0.5	1	0.5	-1.5	-2	0.75			51.04	-0.25	1.75	0.75	0	0.5	1.25	-2.25	1	1
	51.08	0	-1.25	-1.5	-1.25	-0.25	-0.25	-1.75	-1.5	1			51.08	1.75	1.25	-1	0.5	0	0.5	-1.5	0.75	1
	51.12	-0.75	-0.5	-0.5	-0.5	-2.25	0	-1.75	-0.5	0.25			51.12	2.25	0.75	-0.25	2	-0.5	-1.5	-1	1.25	0
	51.16	-1	-2.75	0	-0.25	-3.25	0	0.5	-0.25	0.25			51.16	1.75	-1	1.5	0.75	-1	-2.75	-0.25	0.5	-0.5
	51.2	-0.75	-3.25	0.75	-0.5	-2.5	2	1.5	-0.5	1			51.2	0.25	-0.75	2.25	-0.25	-1.5	-1	0.25	-0.25	0.5
	51.24	-0.25	-0.5	0.75	-0.5	-0.75	2.5	0	1	0.5			51.24	-0.5	0.75	2	1.5	-2	0	-0.5	0.75	1
	51.28	0	0.5	0	0.75	1	0.75	-1.75	1.25	0.5			51.28	0	0.5	0.25	1.25	-0.75	0	-0.5	2	0.5
	51.32	-0.5	0.5	-0.75	1.75	2.25	-0.5	-1	0.5	1.5			51.32	-1	-1	-2	0	1.75	0.75	1	2.25	-0.75
	51.36	1	0	-1.25	0.75	1.25	-1.75	-1.5	-0.5	2.25			51.36	-0.75	-1	-3.25	-1	1.5	-0.5	0.25	0.5	-0.5
	51.4	2.25	-0.75	-0.5	0	-0.25	-1.5	-2.75	-1.25	1.5			51.4	-1.75	-1.75	-1	-1.25	1	-0.75	-1.25	-0.75	0.25
	51.44	1.25	-0.5	0.5	0.25	0.5	-1	-2.75	-2	1.5			51.44	-2.25	-1	0.75	0.25	2.5	-0.25	-1.5	-1.25	1.75
	51.48	0	0.75	0	0	0.25	0	-0.75	-0.5	1			51.48	-2.25	0.25	-0.25	0.75	1.75	0.25	-0.75	-1.25	1.5
	51.52	-0.25	1.75	0.5	0	0.25	-0.5	0	2	-1			51.52	0	1.75	-1.5	1.75	0.75	0.25	0.5	0.25	0.25
	51.56	0	2.75	0.5	0.25	-1	0.5	-0.25	2.5	-1.75			51.56	1.5	2.25	-0.25	2.5	1	0.75	0	0.25	-1.75
	51.6	0.5	3	0	-0.5	-1.25	-1	0.75	-0.25	-2.75			51.6	1.5	2.5	1.25	0.75	0.75	-0.25	1	-2.5	-3.75
	51.64	-0.75	1.5	0.5	-2	-0.25	-1.75	1.25	-2.25	-2			51.64	0	1.25	1.75	-2	0.75	-1.5	2	-3.5	-2
	51.68	-0.25	-0.5	0.25	-2.25	2.25	-2	1.5	-3	0			51.68	0	0.25	2	-2.5	1	-1.75	0.75	-0.75	0
	51.72	0.75	-1.75	-0.25	-0.25	2.75	-1.75	0.5	-1.75	0.75			51.72	0.75	-1	1	-1.5	0.25	-1	-2.75	1.25	-0.25
	51.76	0.25	0.75	0.5	2	2	-0.25	0.25	0.5	0.5			51.76	-1	0	0.75	0.5	0.5	-0.25	-2.25	1.25	1.25
	51.8	0.25	2.25	0.75	2.5	0.5	-0.75	0.75	3	-0.75			51.8	-2.25	1.5	-0.5	2	-0.75	0	0.5	2	2
	51.84	0.5	2.25	0.75	2	-2.25	-0.25	0.25	2.75	-1.25			51.84	-0.5	0.75	-1.25	1.75	-2	-0.25	1.25	1.25	0.25
	51.88	-0.5	1	1.25	1.25	-2.5	0.25	0	0	-1			51.88	0.5	-1	-1	0.5	-1.75	0.25	0.5	-1.25	-0.75
	51.92	-1.5	0.5	2	0	-0.25	0.75	-1	-2.25	-0.75			51.92	-0.25	-0.25	0.75	-0.5	-0.75	0.5	-1	-2.5	-2
	51.96	-1.75	0	1.75	-1.75	1	-0.75	-2	-1.25	1			51.96	-1.75	0.5	2	-0.75	0	0.25	-2.25	-2	-1.25
	52	-1.25	-0.25	1.25	-2.25	0.25	-2	-0.75	-0.75	3			52	-2	0.75	2	-1	0.25	0	-1	-1	-0.25
	52.04	-0.25	-1	-0.25	-1.5	-2	-1.25	0	0.5	2.5			52.04	-1.75	-0.25	0.5	-0.25	-0.75	0.25	0.25	0.75	0.25
	52.08	2.25	-0.75	-1	-1.25	-1.75	0.5	-0.5	1.5	1.75			52.08	-0.75	-0.25	-1	0.25	-1.25	1.25	0.25	1.25	1.5
	52.12	3.25	-1.75	-0.5	-2.25	-0.5	2.25	-2	1.25	1.5			52.12	0.75	-0.75	-0.25	-1	-0.5	2.5	0.5	1.75	1.25
	52.16	2.25	-2.5	-1.25	-1.25	-0.75	3	-3.5	0.5	0.5			52.16	2	-2.25	0.5	-0.75	-0.5	2.25	-0.75	0.5	-0.5
	52.2	0.75	-2	-1.25	1	-0.5	-0.25	-2.5	-1	0.5			52.2	3	-1.75	-0.5	1	-1	-0.25	0.75	-0.25	-2.25
	52.24	-0.25	0.25	0.5	2	-0.75	-2.75	-0.5	-0.5	-0.5			52.24	2	0.75	-1	2	-2	-1.25	0.25	-0.25	-2.5
	52.28	-1.25	1.75	1.5	1.75	-0.75	-3.5	1	0.25	0.25			52.28	-0.5	1.75	-0.25	0.5	-1.25	-1	0	0	-0.75
	52.32	-1	0.75	1.5	-0.25	0	-2.25	0.75	-0.75	-0.75			52.32	-0.5	1	-1	-2.25	0	-1.25	-0.5	0.75	0.25
	52.36	-0.5	-1.5	0.25	-2.25	0.5	-0.25	-0.5	-1.5	-2.25			52.36	0.75	-0.75	-1.25	-2.5	1.25	-1.25	-0.25	-0.25	0.75
	52.4	-0.75	-1.5	-0.25	-1.75	1.75	-0.75	0.25	-0.5	-2.75			52.4	0	-1	-0.25	-0.5	1.5	-0.5	1.5	0.25	-0.75
	52.44	0	0.25	0	0.5	1.25	-1.25	0.25	0.75	-2			52.44	0	-0.25	1.25	2.75	0	-0.25	2.25	0.25	-0.75
	52.48	-0.25	-1.5	0.5	1.25	0.25	-1.25	0	1.5	-0.25			52.48	1	-1	1.5	3.25	-0.75	-0.75	0.5	0	-0.75
	52.52	-0.5	-1.25	1.25	0.25	-0.5	-2	0	1.75	0			52.52	1.75	-0.5	1.5	1.75	-0.5	-2	-0.25	-0.25	-1.5
	52.56	-1.75	-0.25	0.75	-1	0.5	-1.25	0	0.5	0.5			52.56	1.25	-0.5	1.5	-0.25	0	-1.25	-1	0.5	-2
	52.6	-1.75	0.75	0.5	0.75	1	0	-0.75	0.25	-0.75			52.6	-0.75	0.25	1.5	-1	-0.75	-0.75	-2.25	2.25	-1.75
	52.64	0.25	0.25	0.5	2.5	1	2	-1.25	-1	-0.5			52.64	-1.75	1	1.25	0	0	1	-2.5	0	0.5
	52.68	3	-1.25	0.75	1.25	0.5	1.5	-0.75	-1.25	-0.75			52.68	-1	0.25	0.25	-0.75	0.75	1.25	-1.75	-3	1
	52.72	2.25	-1.75	0.75	-1.5	-0.75	0.25	-0.25	-1.5	-1			52.72	-1	-0.5	0.25	-1.5	1.25	0	0.25	-3.75	0.25
	52.76	0.25	-0.5	-0.75	-3	-2.75	0.25	-1.25	-0.5	0.25			52.76	-1	0.75	-0.75	-1	-0.5	-0.75	1.5	-2	0.25
	52.8	-0.5	0.25	0.25	-2.75	-3.25	0.5	-1	-0.75	0.5			52.8	-1.25	2.25	-0.25	-0.75	-2.5	-1	1.25	-1.25	-0.75
	52.84	-1.25	0.5	0.5	-3.5	-2.5	1	-0.5	-0.75	1			52.84	-0.5	1.25	1.25	-0.75	-2	-0.25	-1	0	0.25
	52.88	0.75	1	0.25	-3	-0.75	-0.75	-0.75	0.5	-0.25			52.88	2	0.25	1.75	-1.75	0.5	0.25	-1	0.75	0.75
	52.92	3	1.25	-0.75	-1.75	-0.25	-2.5	0	1.75	-1.25			52.92	3.5	0	1.5	-1.5	0.75	0.25	0	1	1.75
	52.96	2.5	0	-3.5	-0.75	0.75	-3	1.25	1.5	-0.75			52.96	3.5	0	-0.75	0	0.75	-0.75	0.5	1.5	0.25
	53	0.5	-0.25	-3.5	1	0.75	-2.25	2.75	-1	1			53	2	-1	-1	1.25	1.25	-0.75	1.25	0.25	0
	53.04	0.25	-1	-2.25	2.75	0	-2	2	-1.5	-0.25			53.04	0.25	-1.5	-1	2	1	0.5	1.75	-1	0
	53.08	0	-0.5	-2	3	-1.25	-2	-0.25	-1.5	-1.25			53.08	-1	-1.5	-1.25	1	-0.5	0.5	0	-0.75	0.5
	53.12	-0.25	2	-2.5	1.75	0.5	-0.75	-2.5	-1.25	-1.5			53.12	-2.25	0.75	-2.5	1.25	-0.25	0	0.75	0.25	0
	53.16	-0.25	1.75	-1.25	0.25	2.25	0	-2.75	0.25	-1.25			53.16	-1.25	0.5	-2	1.25	0.5	-0.25	1.5	1.25	0.75
	53.2	0.5	2	1	-1.5	1	-0.25	-1	1.25	-0.75			53.2	1	1.25	-1.5	-0.25	0	-0.75	1.25	1.25	0.25
	53.24	0	2.25	1	-0.75	-0.5	0.25	1	-0.25	-1.75			53.24	1.5	2	-1.75	-1	-0.25	-0.25	0.5	-0.5	-1
	53.28	-0.25	-0.5	0.75	-1.75	-0.5	-0.25	-0.75	-1.5	-1.5			53.28	1	0	-1.5	-2	0	1.25	-0.5	-0.25	-1
	53.32	-1	-2.25	1.5	-1.5	-0.25	-0.5	-1.25	-1.25	-0.25			53.32	0	-2	0.5	-1.75	-0.5	1.25	0.25	0	-0.75
	53.36	-0.75	-0.5	0.75	-1	0.75	0.25	-0.75	-0.75	1.5			53.36	-1.25	-1.25	2.25	-0.5	0	0.25	0.75	0.25	0.25
	53.4	-0.25	-0.5	-0.75	-1.75	0.5	0.25	-0.5	0.25	2.25			53.4	-0.5	0	1.25	0.25	0	-0.75	0.75	0.75	1.5
	53.44	0	-0.5	-2.25	-2.5	-0.25	0.75	-1.25	0.25	1			53.44	0.25	0	0.25	-0.5	0.75	1	-0.25	0.75	1.5
	53.48	-0.25	-1	-2	-2.5	-1	1	0	-0.5	-1			53.48	-0.75	-0.25	-0.75	-1.5	0.75	1.25	-0.5	0.5	0.5
	53.52	-0.5	-1	1.25	-1.25	-1.5	-0.25	0.5	-2	-1.5			53.52	-2	0.75	0.25	-1.25	0.5	-0.25	-0.75	-1	-1
	53.56	0	0	2.5	0.75	-1	0.5	-0.25	-1.25	-1.5			53.56	-1.25	1.25	2	0.5	0	0.25	-1.75	-0.75	-1.5
	53.6	-0.5	0	2.25	1.5	0.25	0.25	0	-1.5	-0.25			53.6	-1.25	0.5	3	1.25	0	-1	-1.75	0.25	0
	53.64	-1	-0.25	0.75	0.25	1.75	-1.75	-0.5	-0.75	0.25			53.64	0.25	-0.5	1.25	0.25	1	-2	-1	1	-0.75
	53.68	-1.75	-0.75	-0.75	-1.25	1.5	-1.25	-1	-0.25	-0.5			53.68	0.5	-1	-0.25	-0.75	1.75	-1.75	-1	0.5	-2.25
	53.72	-0.5	-1.25	-0.5	-1.25	0.25	0.5	0	-0.25	-1.75			53.72	0.5	-1.5	0	-0.5	0.75	-0.25	0	0.5	-2.25
	53.76	2	-0.75	-1	0	-0.75	0.25	-0.25	-1	-1			53.76	1.25	-0.25	-0.5	0.5	1.75	1.75	0	0.75	-0.25
	53.8	1.75	0.25	-0.75	1.75	-0.25	-1.5	-1.75	-0.75	0.5			53.8	1.25	1	0.25	1.75	2.5	0.75	0.75	-0.25	1
	53.84	0.25	1.25	0.25	2.5	0.25	-2.25	-2.5	-0.5	0.25			53.84	0	-0.5	0.75	1	1.5	0.5	1	-2	1.25
	53.88	-0.25	0	0.5	1	-0.75	-1.75	-2	-2.25	-0.5			53.88	-0.25	-2.25	0.5	-0.5	-1.5	0.5	0.5	-1.75	1
	53.92	-1.5	-0.75	-0.5	-0.75	0	-1.25	-1.5	-2.75	-0.25			53.92	-1	-3.25	-0.5	-2	-2.5	-0.5	0	-0.5	1
	53.96	-1.25	-1.5	-1.25	-0.75	0.25	-2	-3.25	-2	-1.5			53.96	0.75	-2.75	-1.25	-1.75	-2	-1.75	-2.25	0	-0.25
	54	-1.5	-1.5	-0.75	-1.25	-0.75	-1.75	-2	-0.75	-2.5			54	2	-1.25	-0.75	-2.25	-2.25	-1.75	-2.5	0.25	-0.75
	54.04	-1	-1	1	-1.25	-1.5	-0.5	0	1.25	-2.25			54.04	2	0.25	0.75	-1.5	-1.25	-1.25	-0.25	0.25	0
	54.08	0.25	-1.25	1.75	-0.75	-1	-0.25	0	1	-0.75			54.08	1.75	-0.25	1.5	0	0.25	0	0.5	0	-0.5
	54.12	1	-1	1.5	-2.25	-0.5	-1.75	-2.25	0.25	-0.25			54.12	1.25	-1	0.75	0	0.5	-1	-1.25	1.25	-2
	54.16	1.25	1.5	0.75	-2.5	-2	-1.5	-2	-0.25	0.25			54.16	0.75	1.25	0.25	-0.5	0	-1.75	-1.25	1.25	-2
	54.2	0.5	2.5	-0.5	-2	-1.75	-0.25	0.75	-0.25	-0.25			54.2	-0.25	3	-0.5	0.25	-0.5	1	0.25	1	-1
	54.24	-0.5	-0.25	-0.25	-2	0	1.25	1.75	0.25	-0.25			54.24	-0.5	1	0.5	2	0.25	2.25	1.5	1	-1.5
	54.28	-1.25	-2.5	0.25	-2	1.25	1.75	0.75	1	0			54.28	-0.25	-0.5	0.5	1.75	1.25	1.25	1.75	0.75	-2
	54.32	-0.5	-2	0.25	-2	1.5	0.5	-0.25	0.25	-1.25			54.32	-0.75	-0.25	0.75	0.75	2.25	1	1.5	-0.25	-1.5
	54.36	1.25	-1.25	0	-1	0.25	-1.5	-0.25	-0.5	-1.5			54.36	-0.5	0.5	1.5	0.5	1.5	-1.25	2.75	-1.5	0.5
	54.4	2.25	-1	-1.25	0	-1.5	-0.75	-0.25	-0.25	-0.5			54.4	1	1	0.5	0.5	-0.5	-1	2.25	-2	2
	54.44	2	-0.25	-2.75	0.25	-1.75	-0.25	-0.75	-1.25	1.25			54.44	2	1.5	-0.75	1	-0.5	1	0.5	-2.5	2.5
	54.48	-1	-1.25	-2	0.25	-1.25	0.5	-1	-2	1.75			54.48	1.25	0.75	-0.75	1.75	0.5	1.5	0	-0.5	1.75
	54.52	-2.25	-1.25	-1.5	1	-1	1	-0.25	-0.5	-0.75			54.52	0.25	0.25	-0.25	2	0.25	0.5	0	0	-1
	54.56	-1.25	0.25	-0.25	0.25	0.25	0	-1	0.5	-2.5			54.56	0.5	1	-0.25	1	-0.75	-1.5	-1.25	0.25	-2.25
	54.6	-0.5	-0.75	0.5	-2	1.5	-3	-2.75	0.5	-2.75			54.6	-0.25	1	0.5	-0.25	-0.25	-3.25	-1.75	0.25	-2.25
	54.64	-1.5	-1.75	0.75	-1.75	3	-4.25	-3	0.25	-2			54.64	-1.75	0.25	0.75	0	1.5	-3.5	-0.75	-0.25	-2.75
	54.68	-1.25	-1	1.25	-0.75	2.25	-4	-2.25	0.25	-0.5			54.68	-1	1	1	-1	2.5	-3.75	0.75	0.5	-0.75
	54.72	-0.25	-0.75	2.5	0.5	0	-4.25	-1.5	0	-0.25			54.72	0	1	2.25	-1.5	1.25	-4	-0.5	0	0.75
	54.76	-2	-0.75	1.25	1	-1.5	-4	-0.75	-0.25	-0.75			54.76	0.25	-0.5	1	0.25	-1.25	-3	-0.75	-0.75	2.25
	54.8	-1.75	-1.25	-1.75	0.75	-2.75	-2.25	-0.75	0.5	-0.75			54.8	0.25	-1.25	-0.5	1.5	-4	-1.75	0	0	2.25
	54.84	-0.75	-1.75	-2.75	0.5	-2.5	0.25	-0.75	1.25	-1			54.84	0	-1	-0.5	1.75	-3.25	1	0.5	0.75	0.25
	54.88	-2.25	-1.5	-0.75	0.25	-0.5	1.75	0.25	0.75	-1.75			54.88	-1.75	-0.75	-0.5	0	-0.75	3.75	2	-0.75	-1
	54.92	-2	-0.75	-0.25	-1.75	-1.25	3	1.25	-1.25	-2.25			54.92	-3.25	-0.75	-1	-1.5	-0.25	4.5	2.75	-2.25	-1.5
	54.96	-1.5	1	-1.25	-4.25	-2	2.5	0.75	-2	-1.75			54.96	-3.5	0.25	-1	-2.25	-1	2.5	1.75	0.25	-1.25
	55	0.5	1.5	-2.25	-4	-2.25	0	0	-1.25	0			55	-0.75	1.25	-1	-2.5	-1.5	0.5	-0.5	2.5	0.25
	55.04	2.75	1	-2	-2.5	-2	-1.5	0.25	-0.5	-0.25			55.04	1.5	1.75	-0.25	-2.5	-1.75	-0.75	-2	3	0
	55.08	3	0.5	-0.5	-0.5	-0.25	-1.5	-0.75	-1	0			55.08	2	0.5	-0.25	-2.25	-0.25	-1.75	-1.75	0.5	0.25
	55.12	1.5	-0.5	-0.5	1.25	0	-1	0	-1.25	-0.5			55.12	1.75	-1	-1	-0.25	0.5	-2	-0.5	-1.75	0
	55.16	-0.75	-1.25	-0.25	0	0.5	-1.5	0.25	-2	-1			55.16	0.75	-1	-1	-0.25	1.5	-2	1	-3.25	-0.5
	55.2	-2.25	-0.5	1	-1.5	-0.25	-0.5	-1.75	-2.25	1.5			55.2	-0.25	-2.25	1	-0.25	0.75	-0.75	0	-1.5	1.5
	55.24	-2.25	-0.5	0.5	-2.75	-0.5	-0.25	-3.5	-1	3.25			55.24	-0.75	-2	1.5	-2	-1	0	-1.5	1	3.5
	55.28	-1.75	-1.5	0	-2.5	-1	0	-4.25	0	1.75			55.28	-1	-0.5	1.75	-2.75	-1.25	0.25	-2	1.5	4.25
	55.32	-2.5	-2.25	0.75	-1.75	-1	0.5	-2.5	0.75	-0.75			55.32	-2.5	-0.75	1.25	-1.5	-0.5	0.5	-0.25	0	2.75
	55.36	-1.5	-2	2.25	-1.25	-0.75	1.75	-0.5	0.75	-2.25			55.36	-3	-0.5	1.25	1	0	1.5	1.5	-0.5	1.5
	55.4	-0.5	-1.75	1.75	0	-0.5	0.5	0.25	-1.25	-2.75			55.4	-2	-0.5	0.5	2.75	1.5	1.5	1.5	-0.75	-0.75
	55.44	-1.25	-0.5	-0.25	-0.5	-0.5	-2	-0.75	-2.5	0.5			55.44	-0.75	-0.5	-0.5	1.25	1.25	0	0.5	0.5	-1
	55.48	-2	-0.75	-0.5	-1	-0.25	-4	-1.75	-0.75	2			55.48	-0.5	-1.25	-1.25	-0.25	-1.25	-1.5	0.25	1.5	-0.75
	55.52	-2.5	-0.75	-0.25	-0.5	1.25	-3.75	-0.5	1.25	-0.25			55.52	-1.5	-1.5	-1.5	-0.5	-1.5	-0.25	0.5	2.5	-0.5
	55.56	-2	-0.75	-1.5	0	1.25	-3	1.25	2.5	-1			55.56	-0.25	-1.5	-1	-1.25	0.5	0.25	1	3.25	0.25
	55.6	-1	0.75	-1.5	1	0	-1	1	2.25	-0.75			55.6	0.5	0	-0.75	0	0.75	0.25	0	3.25	-0.25
	55.64	0.5	1.75	-0.75	1	-1.75	0.75	-0.5	0.5	-1			55.64	0.75	2.25	0.25	1.25	-0.25	0	-1.5	1	-0.75
	55.68	0.5	1.25	0	-0.5	-2.75	1.25	-0.75	-0.25	-1.75			55.68	-0.5	3	1.5	1	-1	0	-1.5	-2.25	0
	55.72	0.25	-1.25	-0.25	-3.25	-2.75	1.75	0	-0.25	-1.25			55.72	0.25	1	1.5	-0.25	0.5	0	-0.75	-1.75	0.25
	55.76	0.25	-2.25	-1.75	-4	-2.25	0	-1	-1	0.25			55.76	0	0.75	1.75	-2	1.25	0.25	-0.75	-0.25	0.75
	55.8	0	-1.5	-0.75	-2.25	-1.25	-2.5	0.5	-1.5	0.5			55.8	0.5	0	1.5	-3.5	1.25	-0.5	0.75	-1.5	0.5
	55.84	-0.25	-1.25	1	-1.25	-0.75	-2.25	0.25	-1.75	0.25			55.84	1.25	-0.75	0.75	-1.75	0	-0.75	0.25	-0.25	0
	55.88	-1.5	-1.25	2	-1.25	-0.5	-1	0.25	-1.75	0.25			55.88	0.5	-1.5	0.75	0.5	-1.5	-0.25	-0.25	1.25	-1
	55.92	-0.75	-0.25	0.75	0	0.75	0.5	1	-0.25	0.25			55.92	0.25	-1	0.25	0.25	0	0.75	1	0.75	-1
	55.96	0	-0.25	0	0.25	1.5	0.25	-0.5	1.25	-1.25			55.96	-0.25	-1	1	0	0.25	0.5	1	-0.25	-1.25
	56	0.75	-0.25	-1.5	-0.5	1	-0.75	-1.75	0.75	-2			56	0	-0.75	0	0	-1	-0.75	0.5	-1.25	-2.25
	56.04	0	-2	-1	0.5	-0.75	-0.25	-1.5	-0.25	-1.25			56.04	0.25	-1.75	-1.25	0.75	-1.5	0.5	-0.5	-1	-1.25
	56.08	-1.75	-2	0.25	0.25	-1.25	0.25	-1.75	0	-0.5			56.08	-0.75	-1.75	0	0.25	0	-0.25	-0.25	0.5	0.25
	56.12	-2.25	-1	1.25	-1	-0.5	0.75	-1.75	-0.25	-1.25			56.12	0	-1	1.5	0	2.25	-0.25	-0.75	0.75	1
	56.16	-0.75	0	0.75	-1.25	1.5	0.75	-1.25	-1.75	-1.75			56.16	0.25	-0.25	2.25	-1.25	2.5	0.75	0	-0.5	0
	56.2	0.75	0.5	-0.5	-1	0.5	0.25	0	-2.25	-1.25			56.2	0	0	2.5	-1.75	-0.75	0	2	-2.5	-0.25
	56.24	0.75	-0.25	-0.5	-0.25	-0.25	0.75	-1	-2	-0.25			56.24	-1.25	-0.5	2	-1.75	-1	-0.5	1.75	-1.25	0
	56.28	1	-1.5	-1.25	0.25	-1.25	-1	-2	-1	-1			56.28	-1.25	-1.5	1.5	-0.25	0.25	-1	-1.5	0.5	-0.25
	56.32	1.75	-2.25	-2	0.75	-1.75	-1.5	-1.25	-0.25	-1.25			56.32	1	-0.5	0.75	0.75	2	-0.25	-2.5	0.75	-0.25
	56.36	1	-2.25	0.25	0.5	-2.75	-0.25	-1	-0.5	-1.25			56.36	2.75	0.75	1	1.5	0.5	0	-1.75	-0.25	0
	56.4	-0.75	-2.75	0.5	-1	-1.5	-1	-1	-1.25	-0.5			56.4	2.75	0.25	0	0.5	-0.25	-0.5	-1.25	-0.25	0.75
	56.44	-1	-2.25	0.25	-2	0.5	-2.5	-1.25	-1.25	-0.5			56.44	1.5	-1.25	-0.25	-0.5	0.75	0	-1	0.25	0.75
	56.48	-0.25	-1.25	0.25	-1.75	1	-3	-1	-0.75	0.25			56.48	0.5	-1	-1	-0.75	-0.5	0.25	1.5	0	0
	56.52	0.5	0	0	-2	1	-1.75	0.25	0.25	0.25			56.52	0	-0.5	-0.5	-1.25	-0.5	1	2.25	-1	-0.25
	56.56	1	-0.5	-0.5	-1.75	0.75	-0.5	1.75	-1	0.5			56.56	-0.5	-1	-0.75	-1.25	-0.25	2	1.75	-1	0.5
	56.6	1	0.5	-0.75	-0.5	-1.5	0	0.5	-0.5	-0.25			56.6	-0.5	-1.25	-0.75	0	-0.75	1.75	1	0	0.25
	56.64	-0.25	1.25	-1	-0.75	-2.25	0.5	-0.5	0.75	-1			56.64	-1.75	-0.25	-0.25	1.25	-1	1	-0.5	0.75	-0.25
	56.68	-0.75	0.25	-1.25	-0.5	-0.5	-1	-1.25	1	-1.25			56.68	-1.75	0.5	0.25	0.25	-1.25	-1.5	-1.25	0.75	0.75
	56.72	-0.5	-0.25	0	-0.25	-0.75	-2.5	-0.75	-1	-0.5			56.72	-0.5	1.75	0.75	-1	-2	-3.75	-0.25	0.5	1.75
	56.76	-0.75	1.5	1.5	-0.75	-2.5	-2.75	-0.25	-1.75	-0.5			56.76	1.25	3.5	0.75	-1.25	-3.5	-3	0.5	1.25	0.75
	56.8	-0.75	1.5	2.25	0	-1	-1.5	-0.5	-3	0.75			56.8	2.25	3.25	1.5	-0.75	-1.75	-0.75	-0.5	-0.75	-1
	56.84	-0.75	-0.5	0.75	1.5	1.5	-2.25	-0.25	-1.75	1.25			56.84	1	0.5	1.75	1	0.5	-1.5	-0.5	-2.25	0.25
	56.88	-1.25	-1.25	-0.25	1.5	2.75	-3.5	0	-0.5	1.25			56.88	-0.25	0	1.75	1.5	3	-2.25	0.5	-3.5	0.5
	56.92	-0.75	-2.75	-0.5	0.5	1.75	-3	-1	-1.25	0.5			56.92	-0.25	-1.25	1	0.75	1.5	-1.75	0.75	-3.5	0.25
	56.96	-0.5	-2.75	-0.5	-0.75	-0.5	-0.25	-2	-1	-2.5			56.96	-0.25	-0.75	-0.75	-0.75	-0.5	-0.5	-1.5	-2.5	-1.5
	57	-1.75	-0.5	-1	-1.25	-0.75	0.75	-2.75	-0.5	-2.75			57	-0.75	0.75	-1.75	-1	-0.25	0	-3.75	-0.5	-3
	57.04	-1	1.25	-1.5	-1.5	-0.75	0.25	-1.75	0	-1.5			57.04	-0.75	1	-1.25	-2	-0.75	0.75	-1.5	1	-1.5
	57.08	0.25	0.25	-2.25	-0.25	0.25	0	1.5	0.5	-2.25			57.08	-1.5	0	-0.5	-0.75	-1.25	2	3.25	2	-1
	57.12	-0.25	-0.75	-2	-0.5	-1.25	0.75	3.5	1.75	-1			57.12	-0.25	-0.5	-0.5	0.5	-0.5	2.75	4	3	0.5
	57.16	-1.25	-2	0.25	-0.25	-2.25	0	0.75	1.75	0.25			57.16	0.25	-0.75	0.25	0.75	-0.25	0	2	2.75	0.5
	57.2	-0.75	-0.75	0.75	-1.25	-2.25	0	-1.5	1.5	-1.5			57.2	0	0.5	0.25	0	0.25	-0.75	-0.25	2	0
	57.24	0.25	0	-0.75	-1.25	-2.75	-1.25	-1.5	0.5	-1.75			57.24	0.75	0.75	-2.5	0.25	1.5	-2	-1	1	-0.75
	57.28	-0.5	0.75	-1	0.75	-1.75	-2	-1	-0.25	0.75			57.28	1.5	-1.25	-2.5	0	2	-2.75	0.75	1	0.25
	57.32	-2	1.25	-1.5	0.25	-0.5	-1.25	-1.5	0	0.25			57.32	0	-3.25	-1	-0.75	0.75	-1.25	0.75	0.25	0
	57.36	-1.25	1.75	-3.25	-0.5	0.5	-0.5	-1.25	0.5	1			57.36	-0.25	-1.25	0	-0.25	0.5	1.75	0.25	-1.25	0
	57.4	-0.75	1.75	-2.5	-0.25	0.5	0.75	-1	1	0.75			57.4	0.5	1.25	-0.5	1.25	0.25	2.25	-0.25	-1.5	0.25
	57.44	1	0.5	-1.25	0	0.25	1	-0.5	2.25	-0.75			57.44	1.5	0.5	-1.5	2.5	0.5	1.75	0	-0.25	-0.5
	57.48	1.5	-1	1	1.25	1.25	-0.5	-0.5	2.25	-0.75			57.48	1.5	1.25	-1	2	2.25	0.75	-0.25	0.5	-1.25
	57.52	-0.5	-2	2	1.5	1.5	-1.5	-1	0.5	0			57.52	0.5	2	1.5	1	3.25	0.25	1.5	0.25	-0.5
	57.56	-1.25	-0.5	2	0.75	1.25	0	-2.5	-1.25	0			57.56	-0.5	1.25	3.75	0	1.75	-0.25	0.75	-1.25	0.25
	57.6	-2.25	-0.25	1.25	0	1.5	0	-3	-1.25	-0.75			57.6	-1.25	1	2.25	-0.75	1	-1.5	-0.75	-1.25	0
	57.64	-1.75	-0.5	0.25	-1.5	0.75	0.75	-2.5	-1.5	-1			57.64	-1	0.75	0.5	-0.5	1.25	-0.25	-0.25	-0.25	-0.25
	57.68	-1	0	-0.75	-3.25	-0.5	-0.5	-1	-0.5	-0.75			57.68	-0.75	1	0	-1	0.25	0	1	-0.25	-0.25
	57.72	-0.25	-0.25	-1	-1.5	-1.75	-0.5	0.5	1	0			57.72	0.25	1	-0.25	-0.5	-1	-0.5	1	0.75	0.75
	57.76	2	-2	0.25	1	-2	0	1	0.5	-1			57.76	2.5	-0.25	0.75	1	-1.5	-0.75	0.5	1.25	1
	57.8	2.75	-0.5	1.75	0.5	-1.25	-1.25	1.5	-0.5	-2.25			57.8	2.75	1.25	3	0.25	-0.75	-1.25	-0.25	-1	0
	57.84	1.75	1	1	-0.5	0.5	-3.5	1.25	-1.25	-2			57.84	2.25	1.25	2.75	0.25	-0.75	-1.25	-1	-3.5	-0.75
	57.88	-0.75	0.25	-1	-1.5	1	-3.5	0	-1.25	-0.5			57.88	0	-0.75	-0.5	-1	-1.5	1.25	-1	-1.75	1
	57.92	-1	0.75	-2.25	-2.5	0.25	0.25	-2.75	-0.75	1.5			57.92	-0.75	0.25	-2.75	-2.25	-2	4.5	-1.75	-0.25	1.75
	57.96	0.5	1.25	-2.25	-0.75	-2	0.75	-1.75	0.75	1.25			57.96	0.25	1	-0.5	-0.75	-2	3.5	-0.25	1	0.75
	58	0.25	0	-0.75	0.5	-2.75	-1.25	-2.25	1	1			58	-0.25	-0.25	1.5	0.5	-1	-0.25	-0.5	1.25	1
	58.04	-0.75	-0.75	2	-0.75	-0.5	-3	-1.5	0	0.5			58.04	-1.25	-1.75	1.5	-0.5	1	-3.75	0.25	0.75	1.25
	58.08	-2	-1	1.5	-1.75	-1	-1.5	-0.25	0.5	0.5			58.08	-1.75	-2.5	-1.5	-1.25	0.75	-3	0.5	1	1.5
	58.12	-2.5	-0.75	-0.75	-0.75	0.25	1.25	-1	0.5	0			58.12	-1.75	-1	-3.75	-1.75	0.5	-1.5	-1.5	1	0.25
	58.16	-1.25	-0.25	-1.25	0.25	0.25	2	-1.75	1.75	-1			58.16	-0.5	-0.25	-2.75	-1.5	0	-1	-1.75	1.75	-1.25
	58.2	-0.5	1.25	-0.25	0.25	0.5	0	0	1.5	-2			58.2	0.75	0	-1	0.25	-2	-1.25	0	1.25	-2
	58.24	0.25	2	1.25	1	2.25	-1.25	1.5	1	-2.5			58.24	1.5	0	2.25	2.25	-1	-1.25	0.5	0.5	-3
	58.28	0.5	0.25	2.5	1.75	2	-1.5	0	1	-0.75			58.28	1.75	1.25	3.75	2.25	0.75	-0.5	-0.5	1.25	-2
	58.32	1.5	-1.25	1.75	0.75	0	0.75	0.25	0.5	-1.25			58.32	2.75	2	3	1.25	0.25	1.25	0	1.25	-2
	58.36	2.75	-0.75	0.5	-1	-0.25	0.25	0.5	-1	-2			58.36	2.75	1	1.25	-0.75	0	1	0.75	-0.75	-1.25
	58.4	1	1.75	-0.75	-0.25	-0.75	-2	1.75	-1.25	-0.5			58.4	0.5	-0.25	0.75	-2.5	0.25	1	0.5	-2	-0.5
	58.44	1.25	1.25	-0.75	-0.25	-1	-1	0.75	-0.75	1			58.44	0	-1	1	-1.25	0	1.25	-0.5	-1.5	-0.25
	58.48	-0.25	-0.75	-0.25	-1	-1.25	0.5	-1.5	-1.5	2.25			58.48	0.25	-0.75	0.75	-0.75	-0.75	-0.25	-2.5	0	-0.25
	58.52	-1.25	-0.75	1.5	-0.75	-1.25	1	0	-1.25	3			58.52	1.5	0.5	1	-1	-0.75	-0.25	-0.5	1	1
	58.56	0.25	1.5	3	-0.5	-1.5	1.5	0.25	-1	3.25			58.56	2.5	1	1.75	0	0	0.75	1	1.75	3.25
	58.6	1	0.75	2.75	0.5	0	-0.25	-0.5	-1.5	1.75			58.6	1	0	1	1.75	0.5	0.75	0	1	2.75
	58.64	0.25	-2.5	0.75	1	-1.25	-1.25	-0.25	-1.75	-1			58.64	-0.75	-2	-0.25	1.75	0.75	0.25	-0.25	-0.75	0.75
	58.68	-0.5	-2.5	-1	-1.25	-1.5	0.25	0.75	-0.75	-1.75			58.68	-0.5	-3.25	-1	0.75	1.75	0.75	0.5	-1.5	-0.25
	58.72	0.25	-1.25	-0.5	-1.75	0.75	1.75	0.5	-0.25	-0.75			58.72	1.5	-1	-1.5	-0.5	2.75	0	1	-1	0.75
	58.76	0.5	0	-0.75	-0.25	2	0	-0.75	0.5	1			58.76	2.25	2.25	-1.75	-0.25	2.25	-2	0	-0.25	1.25
	58.8	-0.25	-1	-2	0.75	1.75	0.5	-1.5	0	0.5			58.8	0.75	3.75	-1.75	-1.75	1	-1.25	-0.75	-0.25	1
	58.84	0.75	-1	-1.75	0.25	1.5	0.75	-1.5	0	-0.25			58.84	0.25	2	0	-2.5	0.25	1.5	-0.25	-0.5	0.75
	58.88	0.75	-1	-0.75	-1	-0.5	-0.5	-1.75	1.5	0.5			58.88	0	-0.75	-0.25	-1	-1.75	1	0	-0.25	0.5
	58.92	-0.25	-1	1.75	-0.5	-1.75	-1	-0.75	2.75	1			58.92	-0.25	-0.5	0	0.25	-2.5	-1.25	0	0.75	0
	58.96	-0.5	-2	2.25	-1	-2	0.25	-0.25	1.5	1.75			58.96	0.25	-1	0.75	0.75	-1.75	-1.25	-0.75	0.25	0.5
	59	-1.25	0	2.25	-0.5	-2	-0.5	1	0	0.5			59	-0.25	-0.75	1.75	-0.75	-0.75	-1.25	-0.5	0.75	-0.75
	59.04	-1.25	0.75	2.25	-0.25	-0.75	-0.25	1.5	-0.25	0.25			59.04	-1.5	-0.25	0.75	-1.5	-1	-1	1.25	0	-1.5
	59.08	-0.75	-0.25	2.75	-1.75	-0.25	-0.5	-0.25	-0.5	0.25			59.08	-2.5	0	0.5	-1.5	-1.75	-0.5	1.25	-0.25	-1.5
	59.12	0.75	-0.5	2.25	-1.75	-1	0	-1.5	-1.25	-1.25			59.12	-1.25	-0.75	0.75	-0.5	-2.75	-0.5	0	-0.75	-2
	59.16	2.25	-0.25	0.5	1	-1	0	-0.25	-1.5	-2.25			59.16	1.75	-0.75	1.25	0.75	-2.75	-0.75	-0.5	-1	-1.25
	59.2	3	0.5	-2.25	1.75	0.5	-0.75	0.75	0.25	-1			59.2	1.75	1	0.5	2.25	-0.5	0.75	-0.25	-0.5	1.25
	59.24	2.75	0	-2	1	0.75	-2	-0.25	0.25	1			59.24	0.5	1.5	2	2	1	1.75	-1.5	0.5	1.5
	59.28	1.5	-2.5	-1.75	0.5	0.75	-0.5	-2	-0.75	-0.25			59.28	0.5	-0.75	1	1.25	1.5	1.5	-1.5	1.25	-0.25
	59.32	0.25	-2.25	-1.5	0.25	0.5	-0.25	-0.75	0	-1.5			59.32	1.25	-1.75	0	-0.75	0.5	0	0.5	1.75	-3
	59.36	1	-1.25	-1.75	0.75	-0.5	-0.75	-0.5	1.25	-0.5			59.36	1.5	-1	-1	-0.75	0.5	-2.5	1.5	1.5	-2.5
	59.4	0.75	-0.5	-2.25	1	-2.75	1	-0.75	0.25	-0.75			59.4	1	-0.25	-0.5	-0.25	-0.25	-1.25	1	0.75	-1.25
	59.44	-1	0.5	-1	2	-2.25	1.5	0.5	-1.5	-0.75			59.44	1	0	0.75	0.25	0.75	0.75	1	-0.75	-0.25
	59.48	-3.5	0.75	0.5	2	-0.5	-0.5	0.75	-0.5	1.5			59.48	0.5	-0.5	2.25	1.25	1.25	1	-0.5	0.75	1.5
	59.52	-3.75	1	1	1.25	0.5	-1.5	-0.25	0.75	2.25			59.52	-0.5	0.25	0.25	0.5	0.75	1.5	-1.25	0.75	1.5
	59.56	-1	1.5	0.25	0.5	1.75	-2.5	-1.5	2.25	1			59.56	0.5	2.25	-2.25	-0.25	0.75	1	-1	1	1.5
	59.6	1	2.5	0	-0.5	2	-2.25	-1	2.5	0.25			59.6	0	2.25	-1	0.5	1.5	0.5	0.5	0.75	0.25
	59.64	0	1	-0.25	-0.75	0.25	-0.25	-1	0	-1			59.64	-0.25	1.5	0.25	0.75	0.5	0	1	-0.5	-0.25
	59.68	-1.75	-0.5	-0.75	-1.25	0	1.25	0.75	-1	-1.75			59.68	-0.5	1.5	0.75	0.25	0.25	0	1.5	-2	0.5
	59.72	-1.75	0.75	-0.75	-3	1	0.5	0	-0.25	-2			59.72	-1.75	2	0	-1	0.75	-1.5	0.25	-1.25	0.5
	59.76	-0.75	1.5	0	-3.25	-1.75	0.75	-2	-0.75	-1.75			59.76	-1.75	2.5	-1.25	-1.25	-2	-1.75	-1.25	-0.75	-0.25
	59.8	-1	0.25	-1	-1.75	-4.75	1	-1.5	-2.25	-0.25			59.8	-2	1.25	-1	-1.5	-4	-0.25	-0.25	-2	-0.75
	59.84	0.25	-2.25	-0.75	0.5	-4.25	0.5	0.25	-2.5	0.5			59.84	-1	-2.25	-0.5	-0.5	-4	0.25	0	-3	0.25
	59.88	0.25	-1.5	-1	0.25	-1.5	-0.25	0.5	-1	1			59.88	0	-2.75	-1	-0.5	-2	0	-1.25	-2	1
	59.92	-1.25	-1.25	-0.75	0.75	-1	-1.25	0.25	0.75	1			59.92	0.5	-2.25	-2.25	-0.75	-0.5	-0.25	-1	-0.25	-0.5
	59.96	-0.25	-1.25	0	0	-1.75	-1.25	-0.25	1	1.25			59.96	0.75	-1.75	-2.5	-1.5	-0.5	-1	0.25	1.5	-1.75
	60	0.5	-1.25	-0.25	-0.5	-0.75	-2	-1	-0.25	1.25			60	0.25	-1.5	-0.5	-1.25	0.5	-2	1.25	0.5	-1.5
	60.04	0.25	-1.25	0	0	1	-2.25	-0.75	0	1			60.04	-0.75	-2	3	0	0	-0.5	0.75	0.5	-0.25
	60.08	0.75	-1.25	1.5	1.25	2.25	0.25	0.75	1.5	0.75			60.08	-1.5	-1.75	3.25	0.75	0	1.5	0.75	1.5	0.5
	60.12	1.25	-0.25	2.75	2.5	2.25	1.75	0.75	2	0.75			60.12	-1.5	0.5	2	1	1	0.75	0.25	2	0.5
	60.16	1	1.25	1.75	2	1.25	1	0	0.75	-1			60.16	-0.25	1.25	1.5	1.5	0.75	-0.25	-0.5	0.25	0
	60.2	1.5	0.25	2.25	-0.5	2	0.25	0	-0.25	-2.5			60.2	1.5	0.5	2.75	0.5	3.25	0	-1.5	0	0.5
	60.24	1	-0.25	1.25	-1.25	2	1.75	2	-1.5	-1.25			60.24	1.75	0.5	2.5	1	2.25	1.25	0.25	0.25	0.75
	60.28	1	0.75	-0.5	-1.25	1	2.25	1	-0.5	-0.75			60.28	1.25	1.25	0.75	-1.5	-0.75	1.5	0.75	-0.25	0.5
	60.32	0.75	0.25	-0.75	-1.25	0	0	0	1	-2.25			60.32	1.75	1.25	0.25	-2.5	-1.25	-0.5	0.25	0.75	-1
	60.36	0.75	0.5	-1	-0.5	0.25	-2.25	-1.5	1.5	-2.25			60.36	1.75	1.25	0.5	-0.75	0.25	-1.5	-0.25	1.25	0
	60.4	1	1	-1	-1.25	0.75	-2	-0.75	0.75	-1			60.4	2	1.25	0	0.5	0.75	-1.5	1.5	0.5	1.75
	60.44	1.5	0.75	0.25	-1.25	1.25	-0.5	0	0.25	1.25			60.44	2.5	0.25	0.75	0	0	0	1.75	-0.25	2.25
	60.48	0.75	0.25	1.75	-0.75	0	0.5	0.5	0	2			60.48	1.25	0	0.5	-0.5	-0.5	1	1	-1.25	-0.25
	60.52	-1	-1	0.75	0.75	-2.5	0.25	0.5	1.75	2.25			60.52	-1	-1.5	-0.75	-0.25	-1	0.75	-0.5	0.5	-0.25
	60.56	-2	0	-0.25	1.5	-2.5	-0.5	-0.5	2	3.5			60.56	-2.5	-0.5	-0.25	-0.75	-0.75	0.25	-2.5	2.5	1
	60.6	-1.25	0.25	-1	0.75	-1	-1.5	-2.25	0	2.75			60.6	-1.5	0.25	-0.5	-1	0.5	-1.5	-3.25	1.25	-0.75
	60.64	-1	-1	-0.75	0.5	1.25	-1.25	-2.25	-0.75	2.25			60.64	-0.25	-1	-1	-0.5	1.25	-2.5	-1.5	-1	-1
	60.68	-1.25	-0.75	0	0.25	2.5	-1.5	-1.5	0	1.5			60.68	1.25	-1	-1.25	-0.25	1.5	-1.75	1.25	-1.25	0.75
	60.72	-1.5	-0.75	0	-0.5	3.5	-3.5	-0.5	-0.5	-1.75			60.72	0.75	-0.25	0.25	-1	2.5	-2	1.25	-0.75	0.25
	60.76	-1	0.5	1.25	-0.25	3.25	-3	-0.5	-1	-1.25			60.76	-0.75	1.5	1	-0.75	2.5	-1.75	-0.5	-1.25	0
	60.8	-1.25	1.75	1.75	2	1.25	0	0.75	-0.75	-0.75			60.8	-2.25	3.25	0.25	2.25	1	-0.25	0.25	-2	-0.25
	60.84	-0.25	2.25	1	2.5	0	0	1.5	-1	-2.25			60.84	-1.25	3	-0.5	3.25	-0.75	0	1.5	-1.75	-1.5
	60.88	1.25	2	0.25	0.75	1	0.25	-0.25	-1.25	-2.25			60.88	0	1	-1.25	2.75	0.25	0.5	-0.25	-0.5	-2.75
	60.92	1.5	-0.5	0.25	-0.5	0.75	1.75	-1.75	-2.5	-1			60.92	0.5	-0.25	-0.25	0.5	0.25	1.5	-1	-0.5	-2.5
	60.96	0.5	-2.25	0.75	-2	-1	1.25	-0.75	-2	-0.5			60.96	0.5	-0.25	0.25	-1.75	-0.25	1	0.5	-1.25	-1.75
	61	-1	-2.25	0.25	-1.75	-3	-1	1	0.25	1			61	-0.75	0.25	0.25	-2	-0.5	-1	1.75	-2.75	-1
	61.04	-2.25	-1.75	0	-0.25	-2.25	-2.75	2.5	1.75	1.5			61.04	-1.5	0	1	-0.75	-0.25	-1.5	2	-2.75	-0.5
	61.08	-2	-2	0.5	-0.75	-1.25	-2.25	2.25	1.75	1			61.08	-1.5	-1	1.5	-1.5	-0.5	-0.75	0.5	0	-0.5
	61.12	-1	-2	-1	-0.25	0.75	-1	1.25	0.75	-0.25			61.12	-0.5	-1.75	0.5	-2.5	0.25	0.25	-0.25	2.5	-1
	61.16	0.5	-0.25	-2.5	-1	1.75	0.25	-0.75	0.25	-0.25			61.16	0	-2.5	0.75	-1.75	1	1	-1.5	2.25	0
	61.2	1.25	0.75	-1.5	0	0.5	1	-1	0.5	-0.25			61.2	-0.75	-1.5	1.5	-0.5	1	-0.5	-1.5	2	0.5
	61.24	1.25	-0.25	0.75	0.75	0.25	0.5	-0.75	0.25	-0.75			61.24	-2.5	0.25	0.25	0.25	-0.25	-0.5	0	2	2
	61.28	0.75	-0.75	1	0.25	-1	0	-1.75	-0.25	0.25			61.28	-1.75	0	-2.25	1	-2	0.75	-0.5	2.25	3.75
	61.32	0.5	-0.5	0.75	0	-2.25	-0.25	-2.75	-2	0.5			61.32	1	1.25	-1.5	1.25	-2	0.75	-2	0.5	3.75
	61.36	1.75	-0.75	1.25	-1	-2	-1.5	-2	-2.75	1			61.36	2.25	1.25	0	1	-1.25	-0.5	-0.75	-0.25	1.25
	61.4	1	-0.5	0.75	0	-1.25	-1.5	-1.5	-3	1.5			61.4	2.25	0.25	1	2	-2	-1	0.5	-0.75	-0.75
	61.44	-0.75	-0.75	-0.25	1.75	-1.75	-1.25	0	-2.5	2.25			61.44	1.25	-0.75	0.5	3	-3.5	-2.25	1.5	-3	-0.25
	61.48	-1.25	-0.25	0.75	3.5	-1.75	-0.5	0.5	-1.75	1.75			61.48	0.75	0	-1.25	4	-3	-1.25	2	-4.75	0
	61.52	-0.75	0	0.75	4	-0.75	1.25	0.75	0.5	0			61.52	0.25	1.25	-0.25	2.75	-1.75	0.75	1	-2.75	-0.25
	61.56	-0.5	-0.75	-1.25	1.5	0.75	1.5	1	1.5	-1.75			61.56	0.25	1.25	-0.75	1	0.25	0.25	-0.75	-1	-1
	61.6	1	-0.5	-4	-0.5	1.75	0.25	0.25	2.25	-1.5			61.6	0.75	1	-2.25	-1.25	1	-0.75	-2	0	-1
	61.64	1.25	-0.5	-3	0	1.5	0	-1.5	1.5	-1			61.64	0.25	-0.75	-1.75	-2	1.25	-0.25	-1.5	0.75	-0.25
	61.68	0	0	-0.25	0.25	0.25	1.25	-0.75	1.5	1.25			61.68	0.25	-0.75	-0.75	-1.25	1	1	0.25	1	0.5
	61.72	0.5	0.5	1.5	-1	0.25	1.5	0.75	2.25	2			61.72	0.25	0.25	0.5	-1.5	2.5	0.75	1.25	2	0.25
	61.76	-0.75	2.25	1.5	-0.75	0.75	0.25	1.25	0.5	-0.25			61.76	-0.75	2.75	1.25	-1	4.5	-0.25	0.25	0.75	-1
	61.8	-0.75	2.75	1	-0.5	-0.25	-0.75	0	-0.25	-0.25			61.8	-0.5	2.25	1.25	0.75	1.75	0	0.25	-0.75	-1.5
	61.84	-0.5	1.25	1	0.5	-0.25	-0.25	-0.5	-1.5	-0.25			61.84	0.25	1	1.75	0.75	0	0.25	0.5	-1.5	-1.75
	61.88	-0.25	0	0.75	-0.25	1	1.5	0	-1	0.25			61.88	1	-0.25	1.25	-0.5	0.5	0.25	2	-1.75	0
	61.92	-0.25	0.5	1.25	-0.5	0.75	2.75	0	0	0			61.92	0.5	0	0.75	-1	1.75	0	2	0	0.25
	61.96	-1	-0.25	1	-2	-1.75	2.75	-1	1.5	0.25			61.96	-1.5	1	0	-0.75	-0.5	1.25	0	2.25	0.75
	62	0.5	-0.25	0.75	-1.75	-1.25	1.25	0	3.5	3			62	-1	1.25	1	0.5	-2	1	-0.75	4	1.75
	62.04	2.25	1.5	1	0.25	-0.25	0	0.25	3.5	3.25			62.04	0	0.5	1.25	1.5	-1.5	0.25	-0.75	2.25	1.5
	62.08	2.5	1.5	2	-0.25	0.5	-0.5	1.75	3	3.5			62.08	-0.5	-0.25	1.5	0.75	-1.5	-1.5	0	0.25	1.25
	62.12	1	-1	2.75	0.25	-0.25	-1.25	3.5	3	3.5			62.12	-0.75	-1.75	1.5	0.5	-1	-1.5	1.5	-0.25	1.75
	62.16	-0.75	-3.5	2.25	1.25	-1.25	-2	1.5	2.5	1.75			62.16	0.25	-2.75	0	0.5	-1.25	-0.5	1.25	-0.25	0.5
	62.2	-1	-2.75	0.5	0.75	-1.25	-2	0	-1	-1			62.2	0.75	-2.5	-0.25	-0.5	-1.75	-0.25	0.25	-1	0
	62.24	-0.75	-1	-1.5	0.5	-1.5	0	0.5	-1.75	-1.25			62.24	1	-2.25	0.25	-1.25	-1.5	0.75	-0.75	-1	0.75
	62.28	-0.5	-1	-1	1.25	-1.25	0.25	1	-1.25	-0.75			62.28	1.75	-3.75	0.75	-1.5	-0.25	-1	0.5	0	2.25
	62.32	-0.75	-0.75	-1.25	-0.25	1.5	0.25	1	0.25	0			62.32	2.25	-2	-1	-1.75	2	-2.75	1	2	1.75
	62.36	0.75	0	-1	-0.75	2.25	0	0.25	1	0.5			62.36	1.75	1	-0.25	-0.75	3.25	-2.25	1	2.25	0.75
	62.4	2.75	0.5	0.5	0.5	2	1	-1	1.25	0			62.4	2	2.75	1.5	2	2.5	-0.5	-0.25	2	-1
	62.44	2.75	0.25	1.75	0	0.5	3	-0.25	0	-0.75			62.44	0.25	2.5	2.5	1.75	-0.5	1.75	-1	0	-2.75
	62.48	1.5	-0.25	1.75	-2.25	-0.25	2	2	-0.5	-1.25			62.48	-0.75	1.5	1.75	0	-1.25	2	-1	-1.75	-3.25
	62.52	0.5	-0.25	0	-2.25	-0.5	0.5	1.75	1.75	-1			62.52	-0.25	-0.25	0	-1.5	-0.75	1.25	-1.25	0.25	-2.75
	62.56	0	-1.25	-1.25	-0.5	-0.25	-0.25	0.5	1.75	0.25			62.56	0	-1.75	-1	-1.75	0	2.25	-1	1.25	0
	62.6	-0.75	-1.25	-0.5	0.75	-0.25	0.25	-0.75	-0.5	0			62.6	-1	-2	-1.25	-0.5	1	1.5	-2	0	1.25
	62.64	-0.5	0.5	0	0.75	0	-0.5	-0.75	-1.5	-0.25			62.64	-0.5	-2	-1.5	-0.25	1.5	-0.25	-1	-1	0.25
	62.68	1	0.25	-0.25	1	0.75	-2.5	0	-1	0.25			62.68	1.5	-2	-2	-0.75	2	-2.5	-0.25	-1.25	-1.25
	62.72	1.75	0	0.25	1.25	0.25	-3.25	0.25	1.75	1			62.72	3	-1.25	-0.75	-0.5	0	-3.25	1	0.5	0.25
	62.76	0.75	0.75	0.75	1	-0.25	-1.75	-1	1	1.75			62.76	1.25	1.25	0.5	0	-0.5	-2	0.5	0	1.5
	62.8	0.75	1	1	1.5	-0.25	1.25	-1	-0.25	2.75			62.8	-1.5	2.5	1	0	-1.5	-1	-0.25	-1.5	2
	62.84	1	0.75	1.25	3.5	1	1.25	-0.75	0.75	1.5			62.84	-2	2	1.25	0.5	-1.75	-2	0	-2	0.75
	62.88	0.25	-0.25	1	2.75	0.5	0.5	-1.5	1.75	-1.25			62.88	-1.75	1.5	2.25	0.75	-2	-2.25	0.5	-1	-1.5
	62.92	0	-0.75	1.25	0.5	1	0.5	-1.75	1.25	-2.5			62.92	-0.5	1.25	2.25	-0.5	0.25	-0.75	0.75	-0.5	-2.75
	62.96	-0.25	0	2	-0.5	2.75	-1	-0.75	0.5	-0.75			62.96	0.5	0.25	1.5	-1	2	0.25	1.25	0.75	-2.5
	63	1.75	1.75	3	-0.5	1	-1.75	-0.75	0	2			63	1.5	0.5	0.5	-1.5	0.25	0.75	1.75	1.25	-0.5
	63.04	2.25	1.75	1.5	0.75	0	0	-0.75	-0.75	2.75			63.04	1.75	0.25	0.25	-0.25	-0.25	1	0.75	1	0.25
	63.08	2	1	-0.75	1	0.25	1.25	0.25	-1.75	2			63.08	1.25	1	-1	0.5	0.75	1.5	-0.25	1	0.25
	63.12	-0.25	-0.25	-1	1.25	0.75	1.75	0.75	-1.75	1.5			63.12	0.75	0.5	-1.75	0.75	1	2.25	-1.25	0.25	0.25
	63.16	-2	-0.75	0	1.25	0	1.5	0.75	0.25	2.25			63.16	-1.5	0.5	-0.75	1	0	0.75	-1.5	-0.25	1.75
	63.2	-1.5	-0.75	-0.25	0.5	-0.75	1	0	1.25	3.25			63.2	-3	-0.25	0	0.75	-0.75	-0.25	-0.5	-1	3.75
	63.24	-2	-0.25	0	0.25	-0.75	0.75	-0.75	1.5	2.75			63.24	-2.75	-1.5	0.5	0.5	0.5	-1	-0.25	-1.5	2.25
	63.28	-0.25	1.75	0.25	1	-0.5	0.75	-1	2.75	0.75			63.28	-0.5	-2	1	1.25	0.75	0	-1.25	1	-0.25
	63.32	1	0.75	0	1.25	-2.25	0.5	-0.25	3.5	0.25			63.32	1	-2.5	0.75	1.75	-1	-0.25	-1	2	-0.5
	63.36	0.5	-0.25	0.5	-0.25	-1.25	0.5	0.75	1	1.25			63.36	1	-1.5	0	2.75	-1	-1	-0.25	1	-0.25
	63.4	0.75	0	0.5	-0.25	1.25	-1	0.5	0.25	2			63.4	2	0.5	-0.25	2	-0.25	-2	-1	1.5	0.5
	63.44	1	1.25	1.75	0.5	2.75	-0.75	0	0	1.75			63.44	2	0.75	0	0.75	1	-2	-2	2	1.25
	63.48	-0.75	1.75	1.75	0.75	2.25	0.75	0.75	-0.25	0.5			63.48	0.5	0.5	1	-1	2	-0.75	-1.25	2	1
	63.52	-0.75	2	1	0	1.25	0.25	0.5	-1.25	-1			63.52	0	0.25	1.25	-1.5	2.75	0	-0.5	0.5	-0.25
	63.56	-0.5	2	1.75	0	1	-1	0.75	-0.75	-1.25			63.56	-1	0.75	1	-0.25	1.75	0.75	1.25	-1.25	-1.5
	63.6	0.25	1.5	1.25	-0.25	2.25	-0.25	0.25	-0.25	-1.75			63.6	-1.75	0.75	0.5	-1	1.5	0	2.25	-1.25	-1.75
	63.64	1.5	1.5	0.5	-0.25	1.75	-0.75	-1.25	0.25	-1.25			63.64	-1.25	1.5	-0.25	-1.5	0.25	-1.25	2	-2.25	-1.75
	63.68	2.25	1	1.25	1.25	1.5	-0.75	-1.5	0.75	0.5			63.68	0	1.75	1.25	-1.25	-0.5	-2	0	-1.25	-0.25
	63.72	1.5	0	1	2.25	1.25	0.25	-0.75	0.5	1.75			63.72	2	1.5	1.75	-0.5	-1.25	-1.75	-2.5	-0.5	1
	63.76	0.5	-0.5	-0.5	2.25	0.25	2.75	-0.5	-0.75	1.25			63.76	2.75	0.25	1.5	2	-1.25	0.5	-3.5	-1.25	0.25
	63.8	1	-0.5	-1.75	1.5	-1.75	4.25	0.75	-0.75	1.5			63.8	3.25	1.25	-0.5	2.25	-1	1.75	-2	-1.5	0.25
	63.84	1.5	-1.25	-0.75	0.5	-1.75	2.25	0.75	0	0			63.84	2.5	0.5	-0.5	1.5	-0.75	1	0	-0.25	-1
	63.88	1.5	0	1.75	-0.75	-0.75	-2	-0.75	1.5	-0.75			63.88	0.25	0.5	0.75	2	-2.5	-0.5	0.25	-0.25	-2
	63.92	1.25	1.25	2.5	0.25	0.5	-2.75	-2	1.75	-0.25			63.92	-0.25	1.25	0.25	2.75	-1	-1.25	-1.25	0	-1.75
	63.96	1.25	1.25	0.25	2.25	2	-1	-0.5	1.75	-0.25			63.96	0.75	-0.5	-1.25	1.25	1	-0.5	-1	0.25	-1.5
	64	0.75	0.5	-1	1	2	-0.5	0.25	1.25	0.75			64	0.75	-0.25	-0.5	-1	0.5	0.75	0.25	0.75	-0.25
	64.04	0.5	-0.25	0.5	-2.5	1.25	-0.5	0.75	0.5	0.75			64.04	0.5	1.25	1	-1.75	-0.5	1	2.25	0.5	0.5
	64.08	1.25	-0.75	0.75	-3.75	1.5	0.75	0.75	0.5	0			64.08	-0.25	0.75	0.5	-2.25	-0.5	3	2.5	0.25	1.5
	64.12	2.5	-0.5	0.25	-1	1.5	0.25	1.25	-0.75	0.5			64.12	-0.75	0.5	-1	-3.25	0.5	2.5	1.5	-1	2.5
	64.16	1.5	1	0.75	1.75	-0.25	0	2.25	-2	-0.25			64.16	-2	0.75	-1.25	-1.25	0.5	0.5	0.25	-2	1.5
	64.2	0.5	3.25	2.5	2.25	-0.25	0	0.5	0.5	-1.5			64.2	-1	1.5	1.5	0.25	0.5	-0.5	0.5	1	0.25
	64.24	-0.75	2.75	3	2	1.25	2	-1	2.5	-1			64.24	-0.25	1.5	1.5	-0.25	1.5	0.5	2.25	2.25	0.5
	64.28	-2	0.75	2	1.25	0.25	1.75	-0.75	1.75	0.75			64.28	-1.75	1	0	-1.25	0.75	1.25	0.75	1.5	0.75
	64.32	-2.75	0.5	1.5	0.25	-0.5	1.75	-1.75	1.5	2			64.32	-3.25	0.5	-0.25	-2	-1.5	1.5	-1.75	1.25	1.75
	64.36	-1	1.25	-0.25	-1	-0.5	1.5	-1	-0.5	1.5			64.36	-1.5	0	0	-1.5	-3.25	2	-2.25	-1	1.75
	64.4	1.5	1.75	-0.5	0	-0.75	1	0.75	-1.25	1.75			64.4	0.75	-0.75	0.75	1.5	-2.25	2	-1	-1	1.5
	64.44	2.25	0.75	0.25	0.5	-0.25	0.5	-0.5	0	3.25			64.44	1.5	-1.25	0.5	1.5	0	1.25	-1.5	0.5	1.75
	64.48	1.25	-1.5	-0.5	-0.75	0.75	-0.75	-1.5	0.25	2.5			64.48	1	-1	0	-0.25	1.5	-2	-1	-0.25	0.75
	64.52	1	-0.5	-1	-2.25	0.5	-1	-0.5	1	0.25			64.52	1	-0.25	0.25	-1.25	1.25	-4.25	0.25	0.75	-0.5
	64.56	2.5	1	0.5	-2.75	0	-0.75	0.25	1	0.75			64.56	0.5	-0.5	1.5	-0.5	0.5	-3.5	0.5	1	-1.75
	64.6	3	2.5	0.5	0.25	0	1.25	0.5	-0.75	-0.25			64.6	0.75	-1	0.75	-0.5	0.5	-2	-0.5	-0.5	-2.25
	64.64	2.5	1.75	-0.75	2.75	0	1	0.5	-2.25	-2			64.64	0.25	-0.5	-1	-0.25	-1	-0.25	-0.25	-1.5	-0.75
	64.68	1.75	0.75	-0.5	2.75	-0.25	-1	1.5	-2.25	-2.5			64.68	1.25	0.5	-1.25	-1.5	-1.5	-0.75	0.75	-0.75	-1.5
	64.72	1	-1.5	-0.25	1	1	-1.25	2.25	-0.5	-1.5			64.72	2.75	0.5	-0.5	-2.75	0.5	-1.75	1.25	1.25	-3.25
	64.76	0.75	-2.25	0.75	0	0.5	-1.25	1.5	0	-0.75			64.76	2	-0.5	0.25	-2.5	0.5	-1.25	1.25	1.5	-2
	64.8	0.25	0	2.75	0.5	-0.75	0	0.25	0	-0.75			64.8	1	1	1.25	-0.75	-1.5	0.25	-0.25	1.75	-0.75
	64.84	-0.25	1.5	2.75	0.25	0.5	1.25	0.5	0.5	-0.5			64.84	1.75	1	2	-0.5	-2.25	1.5	-0.25	0.75	1
	64.88	0	2	1.5	1	1.25	0.75	0.75	1.25	-0.75			64.88	1.25	0	1.25	-0.75	-1.75	0.5	-0.25	-0.5	1.5
	64.92	0.25	0	0.5	1.75	1	0.5	1.5	1.75	-1.75			64.92	-0.75	-0.5	-0.75	-0.25	-0.25	0	0.25	-1.25	-0.75
	64.96	0.75	-1.75	1	0	0.75	-1.25	-0.25	2	-1.5			64.96	0	-1.5	-1.25	-0.25	1.5	-0.5	-1.25	-2	-1
	65	0.5	-2	0.25	-0.5	1.25	-2.25	0.5	2.75	-0.5			65	-0.5	-2	-1	-1.75	2.75	-0.5	-1	-0.75	0.5
	65.04	-0.5	-0.25	-0.75	0.25	0.5	-1.5	0.25	2.5	-1.25			65.04	-2	-1.75	0	-0.25	2	-1.25	0.75	0	1.5
	65.08	0	-0.5	-1.25	0.25	-0.75	-1.25	-0.25	0.25	-1			65.08	-1.75	-1.5	0.75	1.5	0.5	-1	2	-1.25	0.25
	65.12	0.5	-0.25	0.25	0.75	-1.25	-1	0.75	-0.75	-1			65.12	-1	-0.25	1.25	0.25	-1.5	-0.25	2.5	-1.5	-1.75
	65.16	0.25	1	2.5	1.25	-0.25	-0.25	1	0.25	1.5			65.16	-1.25	1.5	1.75	-0.25	-1	1.75	1.25	0.75	-1.5
	65.2	1	2	3.75	3.25	0.75	0.25	0.25	1.5	2.25			65.2	0.5	1.75	2	1.25	0.75	2	-0.5	1	-1
	65.24	0.5	1.25	1.75	2.25	1.75	1.25	-1.5	2	2.25			65.24	0.5	0.75	2	1.75	1.75	0.75	-1.75	0.5	0
	65.28	0	-1	-0.25	0.75	2.5	0.5	-1.5	1.5	2.25			65.28	0.5	0.25	1	0.75	1.25	-0.5	-1	-0.25	0
	65.32	0.25	-2	-1.25	-1.75	1.25	-1.75	0.75	0	1			65.32	1	-0.5	-1	-0.75	0.75	-2.25	0.5	-0.5	0.25
	65.36	0.75	-1.25	-0.75	-0.75	0	-1.75	2.25	-1.75	-1.5			65.36	1	-0.75	-0.75	-1.25	-0.5	-2	2.5	-1	0
	65.4	0.25	-1	0.75	1	-0.5	-1.5	2.25	-1.5	-1			65.4	1.5	-1.5	1.5	-1.5	-1.5	-2	3.5	-0.5	-0.25
	65.44	-0.5	-0.25	2	0	-0.75	-1.25	0.75	-1.75	0.25			65.44	0.75	-1.5	3	-2.5	-0.25	-1.75	2.75	-0.75	-1
	65.48	0.25	2	0.25	0	-0.5	-0.25	-1.5	-2	-0.75			65.48	-0.25	0.25	0.75	-2.75	1	-0.5	0.5	-1.75	-1.25
	65.52	1	3.5	-0.5	-0.5	-0.5	1	-4	-2.25	-2			65.52	0	2	-0.75	-1.75	0.25	0	-1.75	-3.5	-1.5
	65.56	1	2	1.25	-0.25	-0.25	0	-2.25	-1	0.5			65.56	-0.25	1.75	0	-0.25	-1.25	-0.5	-1.75	-2	0
	65.6	1.25	1.25	1.75	0	1.5	-1.25	-0.25	0.75	2.25			65.6	0.25	1.25	-1	0.5	-0.5	-0.75	-1.5	0.75	0.5
	65.64	2	1.25	1.25	0	1.5	-2.25	0	1.5	3.25			65.64	1.75	0.75	0	0.5	0.5	-0.75	0.25	1.5	1.75
	65.68	0.75	0.75	-0.75	-0.5	0.25	-1	0.5	2.5	2.75			65.68	1.5	0.5	0.25	-0.25	0.25	-1	0.75	0.75	0
	65.72	-1.5	1.5	-1.25	0	0	0	0.25	2.75	0			65.72	-1.75	1	0.25	1	-0.5	-1	-1.25	0.25	-2.25
	65.76	-2	1	-0.75	0.75	0	0.5	-0.5	1	-2.25			65.76	-3.25	0.5	0.25	1	-1	0.25	-2.5	-0.25	-3
	65.8	-1.5	1.25	-0.5	0.25	1.5	-0.25	-1.5	-0.25	-2			65.8	-1.75	0.75	0.25	1.25	0.5	0.25	-3	0	-1
	65.84	-1	1.75	0	1	0.5	0.75	-0.25	-1	1			65.84	0.5	1	0.25	1.25	0.25	-0.25	-1.75	1	0.25
	65.88	0	0.5	0.75	0.75	-0.5	1	-0.25	-1	2.5			65.88	1.25	1	-0.75	-0.5	0.25	-0.5	-1.25	2.25	0.75
	65.92	0	-3	1.25	0	-1	1.5	-2	0.75	0.5			65.92	1	-1.5	-0.25	-0.5	0.75	0.25	-2.25	2	1.25
	65.96	-0.5	-2.75	3.75	0.75	-1.25	1.5	-2.25	-0.5	-1.25			65.96	0	-2.75	0.25	0.5	-0.25	0.5	-1.5	0.25	0
	66	-0.75	-0.25	3.75	1.5	-2	1.5	-1.25	-0.5	-1			66	-0.25	-1.75	-0.25	0.5	-1.5	0.75	0.75	0.25	-1
	66.04	-0.25	0.25	0	1.25	-2	1.75	-0.75	2.5	-0.25			66.04	-0.25	-1.75	-1.5	-1.25	0	0.25	1	0.75	-1
	66.08	0	-0.25	-1	-0.25	1.25	-0.25	0.75	3.75	0			66.08	0	-0.75	-0.25	-2	3	-0.75	1.5	0.5	-0.75
	66.12	-0.5	-1.25	-0.75	-2.25	3	-1.5	1.5	4	-0.25			66.12	0.75	0	0.75	-1.75	2.75	-1.25	2.25	0.25	-2.25
	66.16	-1.25	-1	-0.25	-2.25	2.25	-0.5	1	2	0.5			66.16	0.25	0	-0.5	-1.5	1.25	-0.25	1	0.25	-2.5
	66.2	-0.5	-0.75	-0.25	-0.5	1.25	-1	-0.25	0.75	1			66.2	-0.25	0	-0.75	-0.75	0	0	-0.5	0.25	0
	66.24	0	-1	1	1.25	1.25	0.25	-2.5	-0.25	-0.25			66.24	0	0.5	0	1.25	1	1	-1.75	-1.25	0.75
	66.28	-1	-0.75	1.75	0.75	0	1.5	-1.75	-0.5	0			66.28	0	-0.75	0.75	0.5	0.75	1.75	-1.75	-2.25	1.25
	66.32	-0.25	-0.5	1.25	0.25	-0.25	2.25	0.5	-0.75	2			66.32	0.5	-1	0.75	-0.75	-0.5	1.5	0	-1.25	2.75
	66.36	1.5	-0.25	0.25	-0.5	0.25	1.5	1.25	-0.75	2.25			66.36	1.25	1	-0.25	-1.5	0	1	1.5	-0.25	3
	66.4	1	1.5	-1	0	-0.25	-0.75	1.75	-1.25	1.25			66.4	0.5	2.25	-1.75	-1.5	0.5	-1.25	3.25	-1.25	2
	66.44	1.5	2.5	0.5	1.5	-0.5	-2	1.5	-2.5	1.25			66.44	0	2.75	-1.5	-0.5	-0.5	-2.75	2.25	-1.5	1
	66.48	0	2	1.75	1.75	0	-1.75	0.75	-2	0.5			66.48	-0.25	1.5	-0.75	1	-0.75	-3	0.75	-0.25	0.75
	66.52	0.75	1.5	1.5	0.75	-1	-0.75	0	-1	-0.25			66.52	1	0	1	1	-1.75	-0.5	-0.75	0.75	0
	66.56	2	0	1.5	0	-1.75	0	-1.25	-0.75	-1.5			66.56	2	-0.5	1.75	2.25	-1.5	0.5	-2	0	-0.5
	66.6	2	-1	0.75	-1.25	-1.5	-1	-1.25	-1.5	-2			66.6	1.5	-0.75	1.5	0.25	-1	0	-0.5	-1	0.5
	66.64	0.75	0.25	0.25	-2.25	-1	-0.5	-0.5	-1.5	-2			66.64	0.25	-0.25	0.75	-2	-0.75	1.25	-0.25	-0.25	0.75
	66.68	-1.5	1	0	-1	-1.25	0	-1.25	-1.25	0.25			66.68	-1.5	1	-0.25	-1	-1	1.25	0	0.25	0.5
	66.72	-2.25	-1.25	-1	0.25	-0.5	-0.25	-3.75	0	1.25			66.72	-1.75	0.25	-0.75	0	-1	1	-1.25	0	-0.5
	66.76	-0.25	-1.25	-1	0.5	0.75	-0.75	-2.25	2	0.25			66.76	0.75	0.25	-0.25	0	-0.5	-0.75	-1.5	0.25	-1
	66.8	0	0.5	0	-0.25	0.25	0	-1	0.25	-2.25			66.8	0.75	-0.25	-0.5	-0.5	-0.75	-1	-2.25	-0.75	-1
	66.84	0.75	0.5	0	-1	-1	1	-1	-0.75	-2.25			66.84	0	-2.75	-0.5	-1.5	-2.5	-0.25	-0.25	-1.75	0
	66.88	0	0.25	1.25	-1	0	0.25	-1.25	-0.25	-0.25			66.88	-2	-3.5	0.25	-1.5	-1.5	0.75	1.75	0	-0.75
	66.92	0	0.5	1.75	-0.75	1	-0.25	-2	1.5	0.5			66.92	-1.25	-1.25	1	0.75	0.5	2	0	2	-0.75
	66.96	0.5	0.5	1.75	0	1.75	0	-1.25	1	0.75			66.96	0	1.25	0.5	1	2	2.25	-1	1.5	-0.75
	67	1.25	-0.25	0.25	1	0.75	-0.5	0.5	2	0.25			67	-0.25	1.25	0.5	1.25	1.75	0.75	-0.25	1.75	-0.25
	67.04	1	-1.25	-0.25	-0.25	0.25	-1.5	1.75	3.75	-1			67.04	-0.25	0.5	1.5	0.5	0.5	-0.25	0.75	2.75	-0.5
	67.08	0.5	-0.25	-1.75	0	0.5	-1.75	2	1	-1			67.08	-0.25	1.25	0.75	1.25	0.25	-1.25	0.25	0.25	-1.75
	67.12	0.75	-0.25	-2.25	2.5	1	-2	3	-2	0.75			67.12	-0.5	0.5	-1	1.25	0.25	-0.5	0.75	-2.5	-2.25
	67.16	0.25	-0.75	-2	1.75	0.5	-1.25	4.5	-0.75	1.5			67.16	-1.25	0	-2.25	-0.5	0	-0.5	2.5	-1.75	-0.25
	67.2	-1	-0.25	-1	0	0.75	0.75	4.25	-0.25	0.25			67.2	0	-0.25	-1.25	-1.5	0.75	0.25	2	-1.5	0.75
	67.24	-1.25	1.5	2	-0.75	-0.25	1	2	-0.25	0			67.24	1.25	-0.25	1.25	-1	0.25	0.75	0.5	-0.75	0.75
	67.28	0.25	2.5	1.5	-0.75	-0.75	-0.25	-1	-1	-0.5			67.28	2.25	-0.25	1.75	-1.25	0.75	0.75	0	-0.5	-0.25
	67.32	1.25	2.75	1.25	-1.25	0.75	0.25	-2.25	-1	-1.5			67.32	1.75	-0.5	1.75	-1.75	1.75	1.25	-0.75	-1	-0.5
	67.36	1.75	0.5	2	-1.5	2	0.75	-2.5	-0.25	-2.5			67.36	1	-1	1.25	-1.25	1.5	0.5	-2	-0.25	-1.75
	67.4	2	0	2.25	-1	0.5	-0.75	-1.25	0	0.25			67.4	2.25	-0.25	0.25	-1.5	0	0	-1	1.5	-1
	67.44	1.25	0.25	1.75	-0.75	-1.5	-1	0.75	-0.5	1.5			67.44	2.25	0	-0.5	-0.75	-1	0	0.5	2.5	0
	67.48	1	0	-0.25	0.75	-3	0	0.25	1	0.25			67.48	1	0.75	-0.75	-0.5	-1.75	0.75	-0.25	2.5	-0.5
	67.52	0.75	-1	-1	1.5	-2.75	1.25	-1.5	2	0.25			67.52	0.75	0.25	-0.25	-0.5	-1.5	-0.25	-1	1.75	0.25
	67.56	0.5	-2.25	-1	-0.75	-1.75	1.25	-2.25	0.75	0.75			67.56	0.75	-1.5	1	-0.25	-0.25	-0.5	-1.25	0.25	1
	67.6	-0.5	-2	0.25	-1.75	0	-0.5	-1.5	0.5	0.5			67.6	-0.5	-1.5	0.5	-0.5	0.25	0.25	-1.25	0.25	-0.5
	67.64	-0.5	-2	-0.5	-1.25	1	-0.5	-0.5	1.25	0			67.64	-1.5	-1.5	-0.25	0.5	0	1.25	-1	0.25	-0.75
	67.68	0.25	-1.25	-1.75	0	1.75	-0.5	-1.25	0.75	0			67.68	-0.5	-1	-0.75	0.75	0.25	-0.25	-0.5	-1.25	-0.5
	67.72	0	0.25	-0.5	0.25	1.25	-0.25	-0.5	-0.25	0			67.72	-0.5	0	0.75	0.75	1.5	-1	1	-2.75	0.25
	67.76	-0.75	0	0.75	1.75	1	0.5	1	-1	0.25			67.76	-0.25	-1.25	0.5	1.25	3	-1	1.5	-2.75	2
	67.8	-0.75	-1	1.25	1.25	-0.5	1.25	1	0.5	-0.5			67.8	0	-2.5	-1.25	0.75	1.25	-0.75	0	-1.25	1
	67.84	0.5	-1	3.5	1.25	-1.25	0.25	0.75	2.25	-1.25			67.84	-0.5	-1	0.75	-0.75	0	-0.5	0	0	-0.75
	67.88	2	1	2.5	0.5	-1	-1	0.25	2	-0.25			67.88	0.75	1.75	1.5	-1.5	-2	-1	0.75	0.5	-0.5
	67.92	2	1	-0.5	-0.75	0.75	-2	0.75	-1.5	0.5			67.92	0.25	2.5	1	-0.75	-2	-1.75	1	-0.75	-0.25
	67.96	0.5	0	-0.5	0	1.5	-1.5	0	-2.75	0			67.96	-0.75	2	1.5	0.5	-1.75	-1.75	-0.25	-1.25	-0.5
	68	-1	0	-0.5	1.5	0.5	-0.5	-0.75	-1.75	-1.75			68	-1.5	2	1.25	1.5	-1.5	-1.25	-0.75	-0.25	-0.75
	68.04	-2.25	0.25	-0.5	3	-0.25	-1	-0.5	0.25	-2.5			68.04	-1	1.75	0.75	2	0.25	0.5	0	0	-1.25
	68.08	-2.5	0	-0.25	1.5	-2.5	-1.75	1.5	0.5	-1.25			68.08	-1	0.5	-0.25	0.5	-0.25	1.5	-0.25	-1.5	0.25
	68.12	-0.75	-1.5	0.75	-0.25	-1	0	3	-1.5	0.5			68.12	0.25	-1.5	0	-0.25	0	1	0	-1.75	2.75
	68.16	1.5	0	1.25	-1.5	-1.75	1.25	0.25	-1.25	0.75			68.16	1.75	-0.25	-0.75	-1.5	-0.75	0.75	-0.25	-1	2.75
	68.2	1.75	-0.25	0	-1.5	-3.25	1.5	-2	-1	0.5			68.2	1.5	-0.5	-0.75	-1	-1.75	2	0	1.25	1.25
	68.24	1	0.25	-0.75	-1	-1.5	1	-2.25	-0.25	0.5			68.24	1.25	0.25	-0.75	0.25	-2	1.5	0.25	2.75	0.25
	68.28	1	0.75	-2.25	-2.5	1	1.25	-0.75	1.25	-0.25			68.28	1.75	0	-1.75	-0.25	-0.75	-0.25	0.5	2.5	-0.75
	68.32	0.25	0.25	-1.75	-2	2	0.75	-0.5	1.5	-0.75			68.32	1.75	-1.25	-0.75	0.25	1.75	-1	0.5	2.25	-1
	68.36	-1	0.75	-0.25	-1.5	1.5	-1	-0.5	0.75	-0.75			68.36	0	0.5	1	-0.5	1.75	-1.25	-0.25	1	-2
	68.4	-1.25	1.25	1.5	-0.75	1.25	-2.25	-1.75	0.5	0.75			68.4	-1.25	0.5	1.75	-0.5	1.25	-1.75	-1	0	-2.25
	68.44	-0.75	1.25	0.25	-0.5	1.25	-1.75	-1.5	0.75	2			68.44	-1.25	0.75	2	0.5	2.75	-2	-0.75	-0.25	-0.75
	68.48	-0.5	-1.75	-1.75	-1	-0.75	-0.5	-0.5	-0.25	0.25			68.48	-0.75	-0.75	0.25	0	1.75	-2.25	0.5	-1.25	0.25
	68.52	1.25	-1.5	-2.25	0	-1.5	0.5	-0.25	-0.5	-2.25			68.52	0.5	-1.5	0.5	0.5	0	-1.5	1	-0.5	0.75
	68.56	2	-1	-1.5	1.25	-1.25	1.25	-0.25	-1.5	-1.25			68.56	1	-0.75	1	1	-1.5	-1	1.5	-1	1.75
	68.6	1.25	-0.75	0	-0.5	-1.25	0.5	0	-1.75	0.25			68.6	1.75	0.5	0.25	-0.5	-4.25	-1.25	1.5	-0.75	2
	68.64	0.5	-1	2	-1	-0.5	0.25	0.75	-1	2			68.64	1.25	0.25	0.75	-1.5	-2.5	0.25	1.5	-0.25	1.75
	68.68	1.75	-1.75	2.5	-1	-0.75	0.5	1.5	-0.25	1.5			68.68	0.5	-0.5	1.25	-2	-0.5	0.5	0	0.75	-0.25
	68.72	2	-0.25	1	-1	-0.25	0.25	1.75	0.75	1			68.72	0.75	0.25	0.5	-1.5	0.5	0.75	-0.5	1.75	-1.25
	68.76	2	0.25	-0.25	-0.5	2.5	-0.75	-0.25	1	0.75			68.76	1	1	-1.25	0	0.75	0	-1.25	1	-1.75
	68.8	2.75	-0.25	0.25	-1	3.5	-0.5	-2	1	0.25			68.8	1	0.5	-1.5	0.5	0.5	-1	-1.25	0.25	-1.25
	68.84	1	-1	0.75	-1.5	2.5	0.25	-2	1	-0.5			68.84	0.75	-1.25	-2	0.25	1	-0.5	-0.25	0.75	1.25
	68.88	-1	-0.75	1.25	-2.5	-0.5	0.5	-0.75	-0.5	-1.5			68.88	-0.25	-2.25	-1	-1.25	0.5	1.5	0.5	-0.25	3
	68.92	-2	0.5	1	-2.5	-3	-0.75	0	-1	-0.75			68.92	-2	-1.25	1.25	-2	-0.25	2.25	0.5	0.5	1.5
	68.96	-1	2.5	2.5	0.5	-2.25	-2.25	-1	-1	-0.5			68.96	-1.5	-0.75	2	-1.25	-1	0	-0.25	-2	-1
	69	0	2	2.25	1.5	0.5	-2.25	-0.75	-0.25	-1.25			69	1.5	-0.5	1.75	0.25	1.25	-1.75	-0.75	-4.25	-1.75
	69.04	0.5	-0.75	-0.75	1.25	1.75	-2.5	0	1.5	-1.5			69.04	2.25	-0.5	0.75	-0.75	1.75	-2.75	-1.5	-3	-2.75
	69.08	1.5	-2.5	-2.25	1.25	0.25	-1.5	0	2	0			69.08	2	-1.25	0.75	-1.25	0.25	-1.25	-1.25	-1.5	-1.5
	69.12	2.75	-2.5	-1.5	0.25	-0.75	-1.5	0	1	1.75			69.12	3	-2.25	0.75	-1	-0.25	-0.25	-0.25	-0.25	0.25
	69.16	1.5	-1.75	-0.5	-0.5	-1	-0.5	0.25	-0.5	0.25			69.16	2	-1.25	2	0.25	0.25	1	1	0.25	-0.25
	69.2	-0.25	0	0	0	0.25	-0.5	-2	-1.75	-1.25			69.2	-0.75	1.5	0.75	1	2	-0.25	0.5	0	-1
	69.24	-2	2	-0.5	0.25	0.75	1	-2.75	-2.5	-0.75			69.24	-1.75	3.5	-1.5	0.5	3.25	0.25	0.75	0	-0.5
	69.28	-0.75	0.25	-0.25	0	0.75	1.75	-2.75	-1.75	0.25			69.28	0.5	3.75	-1.5	-0.75	2	1.75	1	-0.5	0
	69.32	-0.25	-1.75	0.5	-1	-0.5	-0.75	-1.25	-0.25	0			69.32	0.25	2.75	-0.75	-1.75	-0.75	-1	1.25	0.25	-0.75
	69.36	-0.5	-0.25	1.5	-0.75	-0.5	-3.75	-2.5	-0.25	-1.25			69.36	0.5	1.5	0	-1	-1.75	-4.25	0.75	1.5	-1.25
	69.4	-0.75	1.5	1	-0.75	0.75	-3.25	-2.25	-0.75	-2			69.4	0.25	0.25	-0.5	-0.25	-0.75	-3.25	0	2	-1.25
	69.44	0.25	0.25	1.75	0.75	2.25	-1	-0.5	-1	-2			69.44	1	-0.25	1.5	1.75	0.5	-1.5	-0.75	1.75	-1.75
	69.48	0.75	-0.5	0.5	1	0.75	0.25	0.5	0.25	-1.25			69.48	1	-1	1.25	1.25	-0.5	0	-1	0.5	-2.75
	69.52	0	-1	-0.75	0.5	-2	0.5	0.25	0.75	1			69.52	-1.5	-1.25	0.75	-1.25	-2.25	0.5	-0.75	-0.75	0.75
	69.56	0	-2.25	-2.5	0.75	-1.75	0	-0.5	0.5	0.75			69.56	-2.5	-1	-0.75	-1	-1.5	0.5	-0.75	0.25	3.25
	69.6	0.75	-2	-2.5	0.75	0	-0.5	-0.25	0.5	0			69.6	-2	0.5	-2.5	0	0.25	0	-0.75	1	3.75
	69.64	1	1.5	-1.5	0.75	1.25	0	0	0.25	-0.25			69.64	-1.5	1.75	-1.5	1	1.75	-0.75	-1.25	1	1.5
	69.68	0.25	2	-0.75	-0.5	2	1	1.5	-0.25	-1.25			69.68	-0.75	0.75	-0.5	1	2	0.75	-0.25	0.5	-0.5
	69.72	-1.25	-0.5	0.75	-2	-0.75	0.75	2	1	-0.5			69.72	0.5	-2.25	-0.75	0.75	0.75	1	0.25	1.5	-0.25
	69.76	-1.25	-0.5	0.5	-0.5	-0.75	-0.25	0.75	1.75	0.25			69.76	0.75	-3	-1.75	1	0	0.5	0	1.5	0.25
	69.8	0	-0.25	-0.5	0.5	0.5	0	-0.25	1.75	0.75			69.8	0	-2.75	0	0.75	0.25	0	-1.5	0.5	1
	69.84	0.5	-0.5	0.25	-0.25	-0.75	0	0.25	0.5	0			69.84	0.5	-1.25	1.5	0.25	0.5	-0.5	-1.5	-0.75	2.25
	69.88	1	-1.5	0.5	-1	-1	1.25	-0.5	-0.25	-0.25			69.88	1	-0.75	0.5	-0.5	-1	0.75	-1	-0.5	2.5
	69.92	0.5	-1.25	-0.5	0	-1	-0.75	-1.5	-1.75	0.5			69.92	1.75	0.25	-0.5	-1	-2.75	0	-0.75	-0.75	2
	69.96	-2	-0.75	0	1.25	-1.5	-2	-2.5	-1.75	1.25			69.96	1	1.5	0.5	-1.5	-3.25	-0.25	-0.5	-0.5	0.75
	70	-2	1	0.25	1	-1.5	0	-3.5	-1.75	2.75			70	0	2.5	1.75	-2	-2.25	0.75	-0.5	-0.75	0.75
	70.04	-2.25	0.75	-0.5	0.75	-0.5	1.25	-3	-1.25	1.5			70.04	0	1.5	1.5	-0.75	-0.25	1	-0.25	-1	0.75
	70.08	-0.5	-1.25	-1.5	0.25	-0.25	2.5	-1.5	-0.75	-0.25			70.08	0	0.25	0.5	1	1.25	2	0.5	-2.25	0.5
	70.12	1	-1	-0.75	-0.75	-0.5	1.75	0.25	-0.25	-0.75			70.12	-0.25	0.25	-1	1	0.75	0.75	0.25	-1.75	-0.5
	70.16	0.25	-0.25	0	-2.25	0.25	-0.5	0	0.5	-1.5			70.16	1	0	-2	-0.25	0.25	-0.5	0.75	-0.75	-1.75
	70.2	0.25	0.25	0.25	-2	0.25	-2.75	1.25	1.5	-1.75			70.2	1.25	0	-0.75	-0.75	0.25	-1.75	1.25	1.25	-1.25
	70.24	1	0.25	1	0	-0.5	-3.25	1.75	1	-1			70.24	0.5	-1	1.25	0	-0.5	-2.5	0.25	2.25	-1.25
	70.28	1	0.25	1.25	1.25	-1	-3.25	0.75	0.25	-2.25			70.28	1	-1.25	2	1.25	-0.5	-2	-0.75	0.75	-1
	70.32	0.75	0.5	1.25	1.25	-0.75	-2.5	-0.75	1.25	-1.75			70.32	0.25	-1.5	1	1.25	-0.5	-1.5	-1.75	1	0.5
	70.36	-0.25	0	0.75	-0.75	0	-1.75	-1.75	1.25	-1			70.36	-0.75	-1.25	-0.5	0.25	-0.75	-0.5	-0.25	1.5	0.75
	70.4	-2	0.75	0.75	-1.25	0	-1.5	-1.5	1	-2.5			70.4	-1.75	1.75	0	-0.25	-0.5	0.25	0	1.5	-1.25
	70.44	-1.75	0.5	0.5	-1.25	1.25	-0.5	-1.5	0.25	-4.5			70.44	-0.5	3.5	1	-2	1.75	0.25	-0.75	1	-2
	70.48	-1.5	0.25	-0.25	-1.25	0.75	0.5	-1.25	-0.75	-2.5			70.48	0.75	3.5	0.75	-2.5	1.5	0.5	-0.25	0.5	1
	70.52	-0.25	1.25	-0.75	-1	0.5	1.75	-1	-2	0.5			70.52	1	2.5	0	-1.5	1.75	1.75	0.5	-0.25	2.75
	70.56	0.25	0.5	0.5	0	0	2.5	-1.5	-2	0.75			70.56	0	0.5	-0.25	-1	1.75	0.5	0.25	-0.25	0.25
	70.6	0.25	-0.5	1.25	-0.25	-2	1.25	-1.25	-1.5	2.25			70.6	1	-0.5	-0.5	-1.25	-1	-1	-0.5	-0.25	-1.25
	70.64	0.5	-0.75	-0.75	-0.5	-1.5	-0.5	-1.75	-1	2.25			70.64	2	-2	-1.25	-0.75	-2	-1.75	-0.25	0.75	-0.5
	70.68	1.75	-1.5	-2	-0.25	-1.75	-2	-2	-0.75	2.5			70.68	1	-2.75	-1.25	0.25	-2.75	-1.25	0	0	1
	70.72	2.5	-1.25	-1.5	0	-1.5	-2.75	-1.25	-0.5	1.5			70.72	0.5	-1.75	-0.5	-0.25	-1.75	-1.75	-0.25	-1.75	1.25
	70.76	1	0.25	-0.75	-1.25	-2	-3.25	0	0	-1			70.76	-0.5	0.75	0.75	-0.5	-1.75	-2	0.25	-1.25	-0.75
	70.8	-0.25	0.5	-1.5	-1.25	-2.5	-2	0.75	0	-1.75			70.8	-0.75	1.25	1	-0.25	-1	-0.5	1.25	-1.5	-1.25
	70.84	1	-0.25	-2.5	-0.5	-1.75	-2.75	0.5	-0.5	-0.5			70.84	0.5	0.5	-0.5	-0.5	-0.5	-0.25	1.25	-2.5	0.25
	70.88	1.5	-2.25	-1.25	-0.5	-1	-2.25	-1	-0.5	0.75			70.88	-1	-1	-1.5	-1.25	-1.25	1	0	-1.75	0.5
	70.92	-0.25	-1.75	1.5	-1	-0.25	-0.5	-0.75	0.25	1.5			70.92	-3.25	-0.5	-0.5	-1.25	0	2.25	0.75	-0.5	0.5
	70.96	-3.25	0.25	3	-1	0.25	0.25	0.75	1.5	0.5			70.96	-2.75	0	1.25	-1.5	1	1.75	1.5	0.75	1
	71	-3.75	0.25	2.25	-0.5	0.25	0	1	0.5	-1.5			71	-0.5	-0.25	2	-0.5	0.75	0	1.5	0	-0.25
	71.04	-1.5	0.25	2	-1.25	0.5	0.5	0.25	0.5	-3			71.04	1.5	0.25	3	-0.75	1.5	-0.25	-0.25	0.25	-0.25
	71.08	1	0	0.5	-1	-1.25	1.5	-1	0.75	-2.75			71.08	2.5	0.25	1.75	-0.5	1.25	-0.25	-1.5	0	-0.5
	71.12	2	-1.25	-0.5	-1.5	-1.25	2	-2.5	-0.5	-2.25			71.12	1	-0.75	-0.25	-1.25	-0.25	0	-3	-0.25	-1
	71.16	1	-2	-1	-2	0.25	0	-2.5	-0.5	-3			71.16	1.25	-2.5	-0.5	-1.5	-0.75	-0.25	-2.25	0	-2
	71.2	0	-2.25	-0.5	-0.75	-1.25	-1	-2	1	-3			71.2	1	-3.5	-0.5	-0.5	-1.25	-0.75	-2	1	-1.75
	71.24	0.5	-0.25	-1.25	0	-1.5	-2.75	-2	-0.25	-1.75			71.24	0.75	-0.75	-1.5	-0.25	-2.25	-1.25	-0.75	1.25	-0.5
	71.28	-0.75	-0.25	-1.75	0.25	0.25	-2.5	-1.5	-0.25	-0.5			71.28	0.25	0.75	-1.25	-0.25	-1.75	-1.5	1.25	1.75	0.25
	71.32	-2	-0.25	-1.5	1.5	-0.25	-1.25	-0.25	0	-0.25			71.32	0.25	1.25	-1	1.5	-0.5	-2.25	1.5	0	0
	71.36	-2	0.25	-0.5	0.5	-1.25	-0.75	-0.25	-0.25	-0.5			71.36	0	0.5	-0.5	1.5	0.25	-1.25	0.75	-1	0.25
	71.4	-0.25	-2.25	1	-1	-1	-1.25	-0.5	-2.75	-1.5			71.4	0.5	-2	0.5	0	0.5	-0.25	-0.75	-1.75	-0.75
	71.44	0	-1.75	0.25	-1.25	-1.25	-0.25	-1	-3.75	-0.75			71.44	0.5	-1.25	-0.5	0	0.25	0.25	-1.75	-2	0.25
	71.48	-0.5	1.25	-1.5	-0.5	0.25	0.25	-1.25	-1.25	-1.5			71.48	-1.25	0.75	-2.75	1.5	0.25	0.5	-1.25	-0.25	-0.5
	71.52	-1	1.75	-2.25	-0.75	1.5	0	-2	0.25	-2.25			71.52	-3	1.5	-2.5	1.5	0.5	0.25	-0.5	1	-1.5
	71.56	-0.25	0.5	-2.25	-1	1.5	-1	-2.75	-0.5	-1			71.56	-2.5	1.75	-2.25	-0.5	2.25	0.5	-1.75	0	-1.5
	71.6	-0.5	0.5	-1	-2.5	0	-1.75	-1.75	-0.25	-2			71.6	-0.25	2.5	-0.25	-2.75	2.5	0.5	-1.5	0.5	-2.25
	71.64	-1.75	1.75	0.5	-2.5	-0.5	-2	-1.5	-0.75	-1.75			71.64	0.75	2.75	0.75	-2.25	1.75	0.25	-0.25	1.5	-1
	71.68	-1.75	0.5	1.5	-2	-1	-0.75	0	-2.75	0			71.68	0.25	0.5	1.5	-2.5	0.25	1.5	0.25	1.5	0.75
	71.72	0	-1.5	1.5	0	-2	-0.5	1.5	-2.75	0			71.72	-0.5	-0.75	1.25	-1	-0.75	0.75	0.5	0	2.25
	71.76	1.25	-2.75	1.25	0.5	-0.75	-1	0.5	-1.5	-0.5			71.76	0	-2.25	0.5	0	0.5	-0.75	0.5	-1	2.25
	71.8	1	-3.25	1.75	0.25	1.25	0.25	-0.25	-1.25	-1.25			71.8	0.25	-3.25	2.25	-1	1.5	0	0	-1.25	0.25
	71.84	0.5	-3	0.75	-1	0	0	0	0	-2			71.84	0	-3.75	1.75	0.25	0.75	0.75	1.5	0.75	-0.75
	71.88	0	-0.5	-0.5	-2.25	0	-0.75	0.5	0.5	-2.25			71.88	-0.75	-1.25	-1.5	0.5	-0.5	-0.5	3.25	1.5	-0.75
	71.92	0.75	-0.25	0	-1.75	-1	-1.5	-0.25	0.25	-1.75			71.92	-0.75	-0.25	-1.25	-1.5	-0.5	-1.75	1.25	1	0.25
	71.96	2.25	-1.5	0	0.5	-3	-1.25	-1	-0.75	-0.75			71.96	0.5	-0.5	1	-1.25	-0.75	-2.25	-0.5	-0.25	1
	72	1.75	-2.25	-1.5	2.25	-2.5	-0.75	-2.75	-1	-0.5			72	1.75	-0.75	1.25	1.75	-1	-1	-1	-0.25	-1.25
	72.04	1	-1	-1.75	1.75	-0.25	0.5	-3	0.25	-1			72.04	1	0	0.5	3	-0.5	0.75	-1.5	0	-2.5
	72.08	-0.25	1	-1.5	-0.25	0.5	-1.5	-1.75	0	-1.75			72.08	0	-0.25	0.25	1.25	-0.25	0.5	-1.5	-0.75	-1
	72.12	-1	0.5	-0.75	-1	-0.25	-2.5	0.25	-3	-2			72.12	-0.75	0.5	0.25	0	-0.5	0	0.25	-2	0.75
	72.16	-1	-1	-0.75	0.75	-0.25	-3.5	1.5	-2.75	-0.25			72.16	0.25	1.25	-0.5	-0.25	-0.25	-1	1.5	0.25	0.75
	72.2	-1.25	-1.75	-0.75	1.25	1	-3	0.75	0.5	1.25			72.2	0.75	1	-1.25	0.25	0.75	-1.5	2.25	2.75	1
	72.24	-2.5	-0.5	0.5	-1.75	0.5	-1.25	0	1	2.5			72.24	-0.25	0.25	-0.25	-0.25	0.25	-0.5	1.5	1.5	0.75
	72.28	-2.25	1.25	1.75	-3	0	0	-1.25	0.75	2.5			72.28	0.5	0.25	1	-1.75	1.75	0.5	0.5	-0.5	-0.25
	72.32	-1.75	1.25	2	-2	-1	2.25	-1	0.75	-0.5			72.32	0.75	0.25	1	-1.25	3	1.5	0	0	-1.25
	72.36	0.25	1.25	0.75	-0.5	-2	2.75	-1.75	2	-1			72.36	1	0.25	0.25	1	2.25	2	-2	1.75	-1.5
	72.4	1.5	0.25	0	0.25	-1.25	-0.25	-3.25	1	-1.25			72.4	1.5	0.5	1	2	0.75	0	-2	1.5	-0.25
	72.44	0.25	-1.75	0.25	-0.25	-0.75	-1.25	-3	-0.75	-2			72.44	0.5	0.75	1.5	1.25	-0.5	-0.25	-0.25	-0.75	-0.5
	72.48	-1	-3.25	-0.75	-1.5	-1	-1.25	-2	-1.75	-2.25			72.48	-1	-0.75	0.25	0	-2	-0.5	0	-1.75	-1
	72.52	0.25	-1.25	-2	-3	-0.5	-2.25	-2	-2	-1.75			72.52	0.25	-0.75	-1.25	-1.25	-1.25	-0.75	-1.25	-1.75	0.75
	72.56	1	0	-1	-2.5	-1.75	-2.75	-0.25	-3.25	-1			72.56	1	-0.25	-1	-2.25	-0.75	0.25	0	-3.25	2.25
	72.6	1.5	-0.5	-1	-1.25	-1	-1.5	0.5	-2.75	-0.5			72.6	-0.75	0	-2.75	-0.75	1.25	0.75	1.25	-3.5	1.75
	72.64	0.75	-0.75	-2.25	-0.25	0.5	0.75	0	-1.75	-0.25			72.64	-1.75	-0.5	-1.75	0.5	2.25	1.25	0.75	-3.25	0.75
	72.68	0	-0.5	-1.5	0.5	1	0.5	-1.5	-0.75	1.5			72.68	-0.5	0.25	1	0.75	0.75	0.5	-0.75	-1.75	0.75
	72.72	-0.75	0	0.25	0.5	-0.75	-1.75	-2.25	-1	0.75			72.72	0.5	0.5	1	-0.5	-0.75	-0.75	-1.25	-1.25	-0.5
	72.76	-1.25	0.25	0.75	0.5	-1.25	-1.25	-2	0	-0.75			72.76	-0.25	1.75	1.25	0	0	-0.25	-1.25	-0.5	-1.25
	72.8	-1.75	0	0.25	0.5	-1	-0.25	-1.75	1.25	-1.5			72.8	-0.75	1.5	1.75	-0.75	0.5	0	-1	0.5	-1
	72.84	-1.5	-0.5	0	-0.25	-0.5	0	-0.5	1	-1.5			72.84	-1.25	0	1.25	-2.5	1.75	-1.25	-0.75	0.75	-2
	72.88	-1	-2.5	0.5	-0.5	-0.25	-0.75	1	0.25	0.5			72.88	-0.75	-2	2	-1.5	1.25	-1.75	0.5	1	-1
	72.92	-1	-3	0.25	-0.5	0	-2	0.75	0.75	2			72.92	0.75	-2.75	1.75	-0.5	0.5	-2	0.75	1.75	0.5
	72.96	-1.5	-2	-0.25	-0.5	-0.5	-2.5	0.75	1.5	2.5			72.96	0.5	-2	2	0	-0.5	-2	0.5	2.5	0.75
	73	-1	-1	1.25	-0.75	-0.5	-0.75	0.5	0	1.25			73	0	-0.5	2.75	0.75	0	-1	-0.25	3.75	0.5
	73.04	-0.25	-0.5	1	-1.5	-1.25	0.25	-0.25	-1.25	-0.5			73.04	0.25	-0.25	2	-0.25	-1	0.75	-0.75	3.5	0.25
	73.08	-0.75	0	0.75	-0.75	-2	0.25	-0.75	-0.75	-2.75			73.08	-0.25	0.75	-0.25	-0.5	-2.25	1.75	0	1.25	0
	73.12	-1.5	-0.75	0	1	-2.75	-1.25	-1.25	-1.75	-4.5			73.12	-1.5	1.75	-1.25	1.75	-2.5	1	0.5	-2.5	0.5
	73.16	-0.5	-1.75	0	0.75	-0.5	-1	-1.25	-2.5	-3.75			73.16	0.25	0.5	0	2.25	-0.5	-0.25	-0.25	-4	-0.25
	73.2	-0.25	0.25	-0.75	-0.25	1.75	1.25	-1.75	-1	-1.5			73.2	1	-0.25	-0.75	0	1.5	-1	-0.5	-2	-0.75
	73.24	-0.5	0.25	-0.5	-1.25	0.75	3	-0.75	-0.75	0.5			73.24	-0.25	-1	-1	-1.25	0.75	-0.75	-0.25	-1.25	0.5
	73.28	0.25	-2	-0.25	-0.25	-1.25	2	-0.75	-0.25	1.25			73.28	0	-1.25	-1	-0.25	-0.25	0.25	-1	-0.75	0.75
	73.32	1.5	-3	0	0	-2	-0.75	-1.25	1.25	-0.25			73.32	1	-0.5	-1.5	0.5	-0.75	0	-1.25	-1.25	-0.5
	73.36	1.75	-1.25	0.25	-1	-1.25	-1.75	-0.25	2	-1.75			73.36	2.25	0.75	-1	-0.5	-1	0	0	-0.5	-1.5
	73.4	0	-0.25	0.25	-1.5	-1.5	-0.25	-0.5	1.75	-1			73.4	2.5	2.75	0.5	-0.25	-1.5	1	0.75	1.25	-0.25
	73.44	0	-0.75	0.5	-1.5	-1.25	-0.25	-0.75	1.25	0.5			73.44	2.25	2	2	0.75	-2	0.75	1	1.25	1.25
	73.48	0.75	-1.5	1.25	0	-2.5	-1	-0.25	-0.5	0.75			73.48	2	-1	2.75	1.75	-2.5	0.5	1	0.5	1
	73.52	-0.5	-0.75	1.25	1.75	-3	-1.75	-1.25	-2.25	-0.75			73.52	-0.25	-0.75	1.25	1.25	-1.75	-1.25	0.25	0	-1
	73.56	-0.75	-0.5	0.25	1.5	-2	-3.5	-0.25	-2	0			73.56	-0.25	-0.75	-0.75	0.5	1	-2.5	0.25	1.75	-0.75
	73.6	-1	1	-0.5	-0.5	0.75	-1.75	0.75	-1	1			73.6	1.25	0.5	-0.5	-0.25	1.75	-0.5	-0.25	2.25	0.5
	73.64	0	1.25	-0.5	-1.5	2.5	0.5	0.25	-0.5	-0.5			73.64	1	1.75	-0.25	-0.25	2.25	2.25	-1.5	0.5	-0.5
	73.68	1	0.25	-0.25	-0.75	2.5	1	-1	-0.75	-1.75			73.68	0.75	2	-0.25	-0.25	2.25	2.25	-2	-1	-0.5
	73.72	1.5	-0.75	-0.75	0.5	0.75	0.25	-0.75	-1	-2			73.72	0.25	0.5	0	0.25	0	1.5	-1	-1.5	0.25
	73.76	0.5	-2.5	-0.75	0.5	0	0.5	0.5	-1	0			73.76	0.25	-0.75	0.5	-0.25	-0.25	1	0	0.25	2.25
	73.8	-0.25	-3.75	-1	1.75	0.5	0	1.5	0	-0.5			73.8	0	-2.75	0.75	0	0.75	-1.5	1	1.5	1.25
	73.84	-0.75	-3.25	-0.5	3.25	-0.75	-1	-0.25	-0.5	-1.5			73.84	-0.75	-4.25	1.25	1.75	0	-2.75	1.25	-0.25	-0.25
	73.88	0	-1.25	1	2.25	-2	-1.75	-0.75	0.25	-0.75			73.88	0.5	-2.5	1	1.25	-1.25	-2.25	0.75	-1.5	-0.75
	73.92	-0.5	-1	1.75	0	-2	0	-1.25	1.25	-0.75			73.92	0	-0.25	-1	-0.75	-1.25	0	0	-1.25	-1
	73.96	-0.25	-1.75	1	-1.75	-1.25	-0.25	-0.75	2.75	-0.75			73.96	-0.25	0	-3	-2.5	-1.25	0.75	0.5	-0.5	-0.25
	74	0.25	0	0.5	-2.75	-1.75	-1	0	2.5	-0.5			74	-0.25	1	-2.25	-3.5	-1	0.25	0.75	1	-0.5
	74.04	0	2	0	-3.5	-0.5	-0.25	0.75	1.5	0			74.04	-0.5	2	0	-2.75	-0.25	0.75	0.75	2.5	-0.25
	74.08	-1.5	2.75	-1	-1.75	0.75	-0.5	0	-0.25	0.25			74.08	-1.25	1.25	1.25	-0.5	1	-0.75	1	1.75	-0.25
	74.12	-3	2.5	-1	-1.75	1.5	-1.25	0	0.25	0.25			74.12	-1.5	0.5	1.25	-0.5	2.5	-1.5	1.5	0.75	-0.5
	74.16	-3.5	1	0.25	-0.75	0.25	-2.25	0	0	1			74.16	-1.25	0.5	1.25	-1	2	-0.75	1.25	-0.25	0
	74.2	-1	-0.5	1	1.5	-0.5	-3.25	0	0.5	2			74.2	-0.75	-0.75	1.25	0.5	0.25	0.25	-0.5	-0.5	1.5
	74.24	2.25	-0.25	1	0.75	-0.75	-2.5	-2	1	0.75			74.24	0.75	0.5	1.25	0.75	-1.25	0	-1.75	0.25	0.25
	74.28	4	-0.25	-0.75	0.25	-0.5	-0.5	-3.5	-0.5	0.75			74.28	1.25	2.25	0.75	1.75	-1	-0.5	-2.25	-1.25	0.5
	74.32	1.5	-0.25	-1	0.25	-0.5	0	-1.5	-3.25	0.25			74.32	1.25	2	0	2.75	0.25	0.25	-0.75	-3.25	0
	74.36	-1.75	0.25	-1.5	0.25	-0.5	-1	0	-3	-1			74.36	0	1.25	0.25	2.75	0.5	0	0.75	-2.25	-2
	74.4	-2	0.75	-1.25	0.5	0.75	-1.75	0.25	-1.75	-0.5			74.4	0	0.5	0	2.25	2.75	-0.5	0.25	-0.5	-0.75
	74.44	-1.25	-1.5	0.25	0.5	0	-0.5	1.25	-1.25	-0.5			74.44	0.25	0	0.25	1.5	2.75	-1	0.25	0	0
	74.48	-0.5	-2.75	0	0	0.75	0	0.75	-1	-1.75			74.48	-0.25	-0.5	-1	-0.75	2	-0.5	-1	0.25	-1.25
	74.52	0.75	-2	-1.25	-0.5	1	-1.25	-1.5	-0.5	-1.25			74.52	-0.5	0.75	-2.5	-1	0.5	0.25	-1.25	0.75	-0.75
	74.56	0.25	-0.5	-0.75	-1.25	0.25	-2.5	-3	0.75	1			74.56	-1	1	-0.75	-0.75	-1.25	-0.25	0	2	1.25
	74.6	-0.25	0.25	0.5	-1	-0.25	-1.5	0	3.5	2.25			74.6	0	-0.25	0	-1.5	-2	0.75	1	2.5	2.25
	74.64	-0.5	0.75	1	0.25	-0.75	-0.5	1.25	1.5	0.5			74.64	0.75	-2.25	1.5	-1.75	-1.5	1.75	2	0.5	1
	74.68	0.25	-0.25	0.75	1.25	-0.5	-1	0.5	-2.25	-1.25			74.68	1	-3.25	2	0	-1.75	0.25	1.5	-0.25	-0.75
	74.72	0.75	0.5	0	1	0.75	-1.75	0	-2.5	-2.25			74.72	1	-1.25	0.5	0.75	-0.5	-1.5	-0.25	-0.25	-2
	74.76	1	1.25	0	0	1.5	-2	-1.5	-2.5	-1			74.76	2	1.25	0.5	-1	-0.5	-1.5	-1.5	-1.25	-2.25
	74.8	0.5	0.25	-0.75	-1	-0.25	-0.5	-1.5	-0.75	-0.75			74.8	1	2	-0.25	-1.75	-1.5	-0.25	-1.25	-1.25	-1.25
	74.84	0	-1.5	-2.25	-1	-1.25	0.75	-0.75	1	-1.25			74.84	0.5	0.75	-0.75	-0.75	-1.75	0.25	-0.5	-0.25	0.75
	74.88	0.75	-3	-1.75	-1.25	-0.75	2.25	0	1.75	0			74.88	0.25	-1.25	-0.5	-1.75	-0.75	0.25	-0.5	1.5	2.5
	74.92	0.5	-2.25	1.25	-1.25	0	2.75	-0.5	0.5	0			74.92	-1.25	-1.25	0.5	-1.5	0.25	1	0.25	2.25	3.5
	74.96	0.25	-3	1	-1.75	0.5	2.75	-0.75	-0.75	0			74.96	-0.5	-1.75	0.5	-1.25	1.5	0.5	2	0	2.25
	75	-0.25	-1	0.5	-1.5	0.25	1	-1.5	-1	0.75			75	0	0.25	1	-0.75	2.5	-1.25	0.5	-1.25	-0.25
	75.04	-0.25	1	-0.25	0.75	0.25	-1	-1.5	-1	0.25			75.04	1	1.5	0.5	1.75	1.75	-1.5	-1.5	-2	-2.25
	75.08	0.25	1.5	-0.25	1.5	-1	-2.5	-2	-1	-1.25			75.08	1.5	1.75	1	1.5	0.75	-0.75	-1.75	-1.5	-2.5
	75.12	2.25	1.25	-0.5	1.25	-2.25	-1.75	-1.5	-0.75	-2			75.12	2	2	0.5	1.25	-0.25	0.75	-1.25	0.25	-1.75
	75.16	3	1.25	-1.25	1.75	-0.5	0.25	-1.75	0	-1			75.16	2	1.25	-0.75	1.75	-0.25	2	-1.25	0	0.25
	75.2	0.75	2	-0.5	1.25	2	0.75	-1	0	-0.75			75.2	0	1	0	0.75	0.5	1.5	-1	-0.5	-1
	75.24	-2.75	1	1.5	0.5	2.5	1.25	0.75	-1.25	-0.75			75.24	-1.25	0	0.75	-0.25	1	2.25	0.75	-0.25	-3
	75.28	-2.75	-1.75	1.5	0.75	1.5	1	0.25	-0.5	-0.5			75.28	-1.25	-0.5	-0.5	1	0.25	1.5	1.75	-0.5	-2
	75.32	-1	-3.25	1.75	0.25	-1.25	0.5	-1.5	1.25	-0.25			75.32	-0.5	0.75	-0.5	2	-0.75	-1.25	2	1	-0.25
	75.36	0.75	-2.5	1.25	1	-2	0	-0.25	1.25	-0.25			75.36	0.5	0.75	-0.75	2.25	-0.75	-1.25	1.5	1	0
	75.4	2	-1.75	-0.5	0	-0.25	-1	0.5	0.25	1.25			75.4	2	0	-1.25	0.75	1	-1.25	0	1	1.75
	75.44	0.75	-1.25	-1.25	-0.75	0.75	-0.5	0.25	-0.25	2.75			75.44	1.25	-0.25	-0.75	0.5	2.75	-0.75	-1.5	0	3.75
	75.48	-0.75	-0.75	0	-0.5	-0.75	-0.25	0	0.25	3.25			75.48	0	-0.75	-0.25	0	1.5	-1	-2	-0.75	2.5
	75.52	-0.75	0.75	1	0.25	-0.5	0.25	0.5	0.25	2.5			75.52	-1	-1.25	1	-0.25	-0.25	-1.25	-1.25	-1.5	1
	75.56	-1.25	0.5	0.5	0.25	0.75	-0.25	-0.25	0.25	-0.75			75.56	-1.25	-1.25	2	-0.25	-0.75	-2	-1.5	-2	-0.25
	75.6	-1.25	1	1.25	-1.25	0.5	-1.5	-0.5	-1.75	-2			75.6	-0.75	0.25	2.25	-1.5	-0.75	-1.75	0.25	-2.25	-0.25
	75.64	-1	2.25	2	-2.75	-1	-2	-0.75	-2.25	0			75.64	-2	1.5	1.75	-3.5	-1.25	-0.75	0.75	-1.75	0.75
	75.68	1.25	2.25	1	-2.5	-2.5	0	-0.25	0.5	0.25			75.68	-0.5	2	-0.25	-3.25	-1	1.5	0.25	-0.25	0.75
	75.72	2	1.25	-0.75	-1	-2	0.75	1.5	3.75	-1.25			75.72	2	0.5	-2.25	-1.5	0	1.5	1	2	0
	75.76	2	-1	0	-1.25	-0.5	0.5	2.5	3.5	-0.5			75.76	3.25	-1.5	-1.5	-1.25	0.25	0.5	1	2.75	-0.25
	75.8	1.75	-2.75	1.25	-1.75	0.75	-1.25	1.25	1.25	0			75.8	2.75	-2.25	1.25	-1.75	0.5	-1	0.5	2.25	-0.5
	75.84	-0.25	-1.5	1.75	-1.25	2	-1.5	0.25	0.25	-0.75			75.84	0.75	-0.75	2.25	-1.25	1.75	-1.75	-0.75	0	-1.5
	75.88	-2.25	-0.25	0.5	-0.25	1.25	-0.25	-0.75	0.25	-2.25			75.88	-1.25	-0.25	0.75	-0.25	2.5	-0.25	-1	-0.75	-3.5
	75.92	-2.25	0.5	0	1.25	-0.25	0.75	-2.25	0	-2.25			75.92	-1.25	0.25	1.25	1.5	3	-0.75	-0.5	-0.75	-2.75
	75.96	-1.5	0.75	0	1	-0.5	1.25	-2.75	0.25	-2.25			75.96	-0.5	1	1.25	1.75	2.75	-0.5	-0.75	-0.75	-2
	76	-1.5	0	-0.25	-0.5	-0.25	2.25	-2	1.25	-1.5			76	-0.75	1	0.5	1.25	1.25	0	-1.75	0	-0.75
	76.04	-0.5	0.25	-0.5	-1.25	0.25	2	-0.5	1.25	0.25			76.04	-1.25	2	0.5	0.5	-0.25	0.75	-0.25	2	1
	76.08	0	-1.25	-1.75	-2	-0.5	1.75	0	-1	1.25			76.08	-1.5	1.75	0	-0.75	-1.5	0.5	0.5	1.75	2.25
	76.12	-0.25	-3	-2.5	-2.75	-1.5	0.75	0.25	-3.25	1.75			76.12	-0.5	-0.25	-0.5	-0.5	-2.75	0.25	-0.25	-0.75	2.75
	76.16	-0.25	-2.75	-1.25	-1.25	-1.75	-0.25	-0.25	-3.25	1			76.16	0.75	-0.5	-0.5	0.25	-3.75	0.25	-1	-1.5	1.25
	76.2	0	-2.5	-0.5	-1	-1.5	-1.5	-0.25	-0.25	-0.5			76.2	0.75	0.25	-0.75	-0.75	-3.5	-1	-0.5	0.25	-0.25
	76.24	-0.25	-0.25	0.25	-0.5	-1	-3.25	0	0.25	0.25			76.24	0.75	0.5	0.25	-1.25	-2.75	-2	1	-0.5	0.25
	76.28	-1	3.5	0.75	-0.25	0.25	-4.75	0	0.25	0.25			76.28	1	1.5	1.25	-1	-0.75	-2.25	1	-1	0.25
	76.32	-1.5	2.25	-0.25	0.75	-0.25	-4.25	-2	0.75	0.25			76.32	0.5	1	1.25	-0.25	0	-1.75	-0.25	0.5	-0.25
	76.36	-0.75	0	-0.5	0.5	-0.5	-2	-1.5	1	-0.25			76.36	-0.75	-0.5	0.25	2	1	-0.5	0.5	1.5	-1.5
	76.4	1	-0.5	1.25	0.25	1	0.5	-0.5	0.25	-0.5			76.4	-0.25	-1.25	-0.5	1	2	-1.25	1.75	2.75	-2
	76.44	3	-0.5	0.75	0.25	1.25	2.5	-0.5	-1.25	-0.25			76.44	0.75	-1.75	-2	-1	2.25	-0.25	1.5	2.25	-0.75
	76.48	2.5	-0.5	-1	2	0.5	0.75	-1.75	-1.25	0			76.48	1.25	-0.5	-2.5	0.5	1	0.5	0.25	0.75	-1
	76.52	1.5	-0.25	-1	3	1.25	-1	-2	-0.75	0			76.52	0.75	0.25	-1	2.5	0.5	-1	-1.5	-0.25	-0.75
	76.56	0.75	1	0.5	1	1.75	-1	-1.25	-1.25	-3			76.56	-1	-0.25	1.25	0.5	0.75	-1.5	-3	-1.75	-1
	76.6	0	1.75	1.5	0.5	0.5	-2	-0.75	-0.5	-3.25			76.6	-1	-0.25	2.5	-0.75	0	-2.25	-3.25	-2	0.25
	76.64	-1.25	1	1	1.75	0.5	0	-1.25	0.5	-0.5			76.64	0	0	2.25	-0.75	-1.25	-0.25	-3	-1	2.25
	76.68	-1.75	-0.75	0.25	2.5	1.75	1.25	-0.75	1.5	0.25			76.68	0	-0.25	1.75	0.25	-1	0.5	-1.25	1	0.5
	76.72	1.5	-1.5	0.25	1.25	1.75	0.25	-0.25	1.5	0.75			76.72	2	-1	1	1	0.25	0.75	0	1.75	-0.75
	76.76	2.5	-1.25	0.5	-1.5	1.5	-1.25	0.5	1.75	0.5			76.76	3.75	-0.5	1	0.25	1	1	0.5	0.75	-1.75
	76.8	2.75	-0.5	0.75	-1.75	0	-2.25	-0.25	1.25	0.5			76.8	2.75	-0.25	2.75	-0.75	0.25	0.25	0.75	-0.75	-1.25
	76.84	1.75	-0.5	0.5	0.25	-0.5	-1	-0.5	0	0.5			76.84	0.5	0.5	2	-0.75	1	-0.75	0.75	-1.75	-0.25
	76.88	-0.25	0	0.5	1.25	-0.75	0.5	-0.75	-2	-0.5			76.88	-1.5	0.25	1.5	-0.5	0	1	0.25	-1.25	0
	76.92	-1.5	0.25	0.75	0.75	0.25	1	0.5	-1	-1			76.92	-2.75	-0.25	0.5	0	0.25	2.5	0.25	0.25	-0.75
	76.96	-0.5	1.5	2	-1.5	-0.5	1.25	0.5	1.5	-1.25			76.96	-0.75	1	-0.25	-0.5	-0.25	3.25	-0.75	0.5	0.25
	77	-0.25	0.75	1.75	-1.25	-2.25	0.75	-1	1.75	-0.25			77	-0.75	1.25	-1.25	0.25	-0.75	2.25	-1.5	-1.25	-0.25
	77.04	-0.5	-1.25	0.5	0.5	-2.25	0.25	-0.75	1.75	0.5			77.04	-1.25	-0.25	-1.5	0.5	-1.75	-0.5	0.5	-1.75	-0.75
	77.08	-0.5	-1.5	-0.75	0.25	-1	1	-0.25	0	1.75			77.08	-0.25	-1.5	-2.75	0	-2	-1.25	2.75	-1.25	0
	77.12	-0.25	1	-0.75	0	0.5	0	0.75	-1	2.25			77.12	1.25	-0.5	-2.25	1	-1	-1.25	2.5	-1	0
	77.16	0	3	-1	-1.75	1	-1	2	0	1.25			77.16	1.5	1	-1.25	-0.5	0	-2.25	1	0	1.5
	77.2	0.5	2.75	-1	-2	0.75	-1.75	1.25	1.75	0.25			77.2	0	1.5	0.5	-0.75	0.75	-2.75	-0.5	0.25	2
	77.24	2	0.75	0	0.25	0.75	-1.25	0	3	0.75			77.24	0.5	0.75	1.75	0.5	0.5	-2.5	-0.25	2	2.25
	77.28	2.5	0.25	1.25	0.75	0.5	-1.25	-0.25	1.75	0.75			77.28	2	0.5	2.5	0	0.75	-1.75	0.25	2.25	1
	77.32	3.25	0.25	0	0	-1	-1.5	-0.75	0.25	-0.5			77.32	2.25	1.25	1.5	-1	-0.25	-0.5	0	1.25	-0.25
	77.36	0.5	0.5	-1	-0.25	-0.75	-1.25	-0.75	-1.5	-0.25			77.36	0.5	1.75	-1	-0.25	1	-0.25	0.5	-0.75	-0.5
	77.4	-1.5	-0.25	1.5	0.5	-0.75	0.5	0	-2.25	0.25			77.4	0.25	0.25	-0.75	0.5	1.75	0	0.5	-1.75	1
	77.44	-2.5	-1.25	1.5	2	-1.25	1	0.25	-0.75	0.75			77.44	0	-1.25	-0.75	0	0	0.25	-0.75	-1.25	-0.5
	77.48	-2.25	-0.5	-0.25	1.25	-0.5	0.75	0.75	0.75	0.75			77.48	-0.5	-1	-0.25	0	-1.5	0.5	0.5	-0.75	-1.75
	77.52	-1	0	-1.5	0.5	0.75	0.25	-0.75	1.5	0.25			77.52	0	-1.25	0	-0.75	-0.5	0.25	0.5	1	-0.75
	77.56	-0.5	-1.25	-2	0.5	1.5	-0.25	-2	2.5	-1.75			77.56	-0.25	-2.25	-0.75	-1	1.75	0.75	-0.75	2.75	-1
	77.6	0	-0.5	-1	0.75	2	-1	-1.75	1	-1.25			77.6	0	0	-1.5	0	1.5	0.75	-1.25	2.75	0
	77.64	-0.25	-0.75	0.5	0.5	0.25	-1.5	-1.75	-1	0.5			77.64	0.75	0.5	-0.5	0	-0.75	1.25	-1	0.5	1.25
	77.68	0.75	0	1.5	0.5	-0.5	-2.25	-1.75	-1.75	0.25			77.68	0.5	0.75	1.5	-0.5	-1.25	-0.75	-0.75	-2.25	0.75
	77.72	2.5	0.25	1.75	0.25	1.25	-1.75	-0.75	-2	-2			77.72	0.5	1	2.5	0.75	-0.5	-1.5	-0.5	-2.75	-1.5
	77.76	1.75	0.75	0.75	-1	1.75	0.75	0.5	-2	-2.25			77.76	0.75	1.25	0.75	-0.5	0.25	0.5	0.5	-1.75	-1.75
	77.8	0.75	0.75	0.5	-1.5	0.75	2.25	0.25	-1.5	-1			77.8	0.5	1	-0.25	-0.5	0.5	0.75	-0.75	-2	-0.5
	77.84	-0.5	-0.25	1	-0.25	0	1	0	-1.25	0			77.84	-1	-0.5	1.5	-0.25	0.75	-0.25	-1.75	-1.75	0.75
	77.88	-1.25	0	0.5	0.75	0.25	-1.25	-0.25	0	0.25			77.88	-1.25	-1.25	1.25	-0.5	1	-1.25	-0.5	-0.25	1.75
	77.92	-1	0.5	-1	1	-0.25	-0.5	0	1	1			77.92	-1	-1	-0.25	1	1	-1	0	0.25	2.75
	77.96	-0.5	1	-1.25	1	0.5	1	1.5	1	0.75			77.96	-0.5	0	-0.5	1.75	1.25	-1.5	1.25	-0.5	2
	78	-0.5	2.25	0.75	0.75	0.75	1.75	1.25	0.25	0			78	-0.25	1.25	-0.25	0.5	1.75	-1.75	0.75	-1.25	-0.5
	78.04	-0.5	1.5	1.75	0.5	-1.75	0	0.25	0.75	-1.5			78.04	-1.25	0	0	-0.75	0	-2	0.5	-1.25	-1
	78.08	0.75	-0.5	0.75	0.25	-2.5	-0.25	0.75	1.5	-2.5			78.08	-0.75	-1.5	-0.25	-1.25	-0.25	0	0.5	0.25	-1
	78.12	2.25	-1.75	0	1	-1.5	0	1	1.25	-2			78.12	0.75	-1.25	0	-1.25	-0.5	1.75	-0.25	2	-1
	78.16	2.25	-1.75	1	0.75	-0.25	-0.5	0.5	0	-1			78.16	1.25	-0.5	1	-0.75	-0.5	0.5	-0.25	1	-1.5
	78.2	1	-0.75	0.5	-0.75	0.75	-0.25	-0.75	-0.25	0.5			78.2	1.25	-0.25	0.75	-0.75	-0.25	-0.5	-0.25	1.25	-0.5
	78.24	-0.5	-0.75	-1.25	-1.5	0.75	0.25	-1.25	-0.25	2			78.24	-0.75	0.5	-0.25	-0.75	-0.25	-1.25	-0.25	0.75	-0.25
	78.28	-1.75	-0.25	-1	-1	0.75	0	-1.5	0.75	3.25			78.28	-1.25	1	-1.25	-0.5	-0.5	-0.5	-1	1	1.75
	78.32	-1.5	-1	-0.5	0	1.75	-1	-1.5	1.75	3.25			78.32	-0.75	0	-2.5	0	0.25	0.5	-0.75	0.5	2.25
	78.36	-1.25	-3	0	0	1	-2.25	-1.75	2.5	0.75			78.36	0.25	-1	-0.25	0.5	1.25	1	-1.25	0.25	-0.25
	78.4	-1.25	-2.5	0.5	-0.5	0	0	-1	1.25	-1.5			78.4	0.5	-1.5	1.25	0.5	-0.25	1.75	-2.75	-0.25	-2
	78.44	-1	0.25	-1	0.25	-0.5	0.75	1.5	0.5	-1.25			78.44	1.25	0	-0.5	2.25	-0.5	-0.5	-1.5	1	-2.5
	78.48	-0.5	1.5	-3.5	1	-1.25	-0.25	3	1.5	-0.5			78.48	0.25	0.5	-1.5	2.25	-0.75	-1.75	1.75	1.5	-0.75
	78.52	-2	1.5	-2.5	0	-0.25	-0.5	2.5	3	0			78.52	-1.75	1.75	-1	0.25	0.25	-0.5	3.5	1.5	0.5
	78.56	-0.5	1.25	1	-1	0.5	-0.5	0.75	3	0.25			78.56	-1.25	2.25	0.5	-0.5	0.75	-0.25	2.5	0.25	0.25
	78.6	1.5	0.5	1.75	-1.75	-0.5	0.5	-0.25	1.5	-1			78.6	0	1.5	1	-2	0.25	-1.25	1.75	-0.75	-3
	78.64	1.75	-0.75	0.75	-1.75	-1	1	0.75	-0.5	-1			78.64	1	0.25	1.25	-1.75	0.75	-1.5	0.75	0	-2.75
	78.68	2.75	-1.5	1.25	-2	0.5	0	2	-1.75	0.25			78.68	1.25	-1	-0.5	-1.75	0.5	-0.5	0.25	-0.25	1
	78.72	2.5	-1.25	1.75	-2.75	0.75	-0.25	2.25	-1	0.75			78.72	1	-1	-1.25	-1.75	-0.75	1.25	1	0.5	1.25
	78.76	1	-0.25	2.25	-1	0	-1.25	0.25	0.5	0			78.76	0.75	-1.25	-0.25	0	-1	1.75	0.5	0.5	1.25
	78.8	0	1.5	0.5	0.75	-0.5	-0.5	-0.75	2.25	0.75			78.8	1.25	0.25	0.25	0.75	-0.5	0.75	-0.25	1.25	0.75
	78.84	-0.75	2.75	-2	2.25	0	1.25	-1	2.25	2.25			78.84	1	0.75	-0.25	1	0.5	0.5	-0.25	1	1
	78.88	0.75	2	-2	1.25	-0.25	2	0.5	1.25	2			78.88	1.25	0	0	1.5	1	1.25	0.75	1.5	0.75
	78.92	2.75	1.25	-0.25	0.75	-0.25	2	-0.5	2.5	0.5			78.92	2	0	1.5	1.5	0.75	1.75	0	1.5	0.25
	78.96	3	0.25	-0.25	0.75	1.25	0.5	-1.25	2	0.5			78.96	1.25	0.5	0.75	1.5	0.5	1	-0.5	-0.5	-0.25
	79	2.75	-0.25	0.25	-0.5	1.75	-1	-0.75	-0.75	0			79	-1	0.5	0.25	1	0.25	-0.75	-1.25	-2.75	-2
	79.04	1.75	0.25	2	0	2.75	-1	-1	-0.75	0.25			79.04	-1	1	0.75	0.25	-1.25	-0.75	-2	-1.5	-2
	79.08	0	0	3	2	2.5	0	-1	-0.25	0.25			79.08	-0.25	-0.5	3	0.5	-1.25	-0.75	-0.5	-0.75	-0.5
	79.12	0.25	-0.5	3.25	1.25	-0.25	0.5	-0.25	0.75	-0.25			79.12	1.75	-2	3.75	-0.25	-1.25	-0.5	0.5	0.75	0.75
	79.16	0.25	-0.25	2.5	0	-2	0.5	0	1.5	-0.5			79.16	0.25	-1.25	2.5	-1.75	-1.5	-1.25	0.5	1.25	0.75
	79.2	-0.75	-0.25	-1.25	0.25	-0.5	0.5	-0.5	-0.5	1.25			79.2	-1	0	-0.25	-2	0	-1	0.25	0.25	1.5
	79.24	-1	0	-2	1.75	-0.5	0.5	-1	-2	1			79.24	0.25	0.5	-1.5	-1	0.25	0	0	-0.25	2.25
	79.28	-1.5	-1	-1	1	-2.25	1	-1	-0.5	0			79.28	2.25	1.5	-1.75	0	-0.5	1.25	-0.5	0.5	1.75
	79.32	-1.75	-1	-0.5	-0.5	-2	0.5	-0.5	-0.25	-0.75			79.32	2.5	1.25	-1.25	1	-1.5	1.75	-0.5	1.5	0.75
	79.36	0.5	-1	-1	0	-1	0	-0.25	-1.25	-0.75			79.36	2.5	1.5	-0.5	2.25	-1	1	0	0.75	0
	79.4	2	-0.25	0.5	1.75	-1.5	-0.25	0.75	-1.25	0.75			79.4	1.25	1	0	2	-0.75	0.5	0.5	0.25	-1.25
	79.44	2.75	-0.5	3	1.25	-1	-0.5	-0.25	-0.25	1			79.44	0.75	0.5	0.75	0.25	-0.25	-0.25	-0.5	0	-1.5
	79.48	1	0.5	4	0.5	-0.75	-1	-0.25	0	0.5			79.48	-1	0.5	1.75	-2.5	-0.75	-0.5	0.5	-1.5	-1.5
	79.52	0.75	2.5	2.25	0.5	-1.5	-3	-0.5	0.5	-1.5			79.52	-0.75	0.5	1.5	-2.75	-1	-0.75	2	-2.75	-1.5
	79.56	2.25	3.25	-0.25	0.25	-0.5	-2.75	0	-0.5	-1.25			79.56	0.5	0.75	1.5	-2	-1.5	-1	1.75	-1.25	-0.75
	79.6	2.75	2.25	-2.25	0.5	0.5	-0.75	0.5	-1.25	-0.75			79.6	2.25	1	0	-0.75	-1.5	-1.5	1	-1	0.75
	79.64	0.5	-1	-2	0	1	0.25	1.25	-1.5	-0.5			79.64	0.5	-0.5	-1	-1	-0.75	-2.75	0	-0.5	1.5
	79.68	0	-2.25	0.5	1	0.25	-0.25	0.5	-1	0.25			79.68	-0.5	-0.5	-1.5	-1	-0.75	-3	-1.5	1	0.75
	79.72	0	-0.5	1.5	0.5	1	0	0.75	0.75	0.5			79.72	-1	0.5	-1.25	-1.5	0.25	-2.75	0.5	2	-0.75
	79.76	-0.25	-0.25	2	1	2.5	0	0.75	2.75	0.25			79.76	-1	0.75	0.25	0.25	1.5	-1.5	2.75	1.25	-3
	79.8	-1.25	0.75	0.5	0.25	2	0.5	1.25	3	0.75			79.8	0	0.75	-0.5	-0.25	0.5	-1	1.5	0	-2.5
[truncated: 3,164 more rows]
