# Supplementary material for: Conserved allosteric inhibition mechanism in SLC1 transporters
Source: eLife. 2023 Mar 1;12:e83464. doi: 10.7554/eLife.83464 (PMC10017108; doi:10.7554/eLife.83464)
Supplement: Figure 4—source data 1. [file elife-83464-fig4-data1.xlsx]

## Sheet: Sheet1
Figure 4 original data		EAAT1-UCPH
Figure 4A	1mM Glu only control (anion condition)																				Figure 4B	1mM Glu+0.2µM UCPH (anion condition)																				Figure 4C	40µM UCPH only control (anion condition)
Time(ms)	Trace#1	Trace#2	Trace#3	Trace#4	Trace#5	Trace#6	Trace#7	Trace#8	Trace#9	Trace#10	Trace#11	Trace#12	Trace#13	Trace#14	Trace#15	Trace#16	Trace#17	Trace#18			Time(ms)	Trace#1	Trace#2	Trace#3	Trace#4	Trace#5	Trace#6	Trace#7	Trace#8	Trace#9	Trace#10	Trace#11	Trace#12	Trace#13	Trace#14	Trace#15	Trace#16	Trace#17	Trace#18			Time(ms)	Trace#1	Trace#2	Trace#3	Trace#4	Trace#5	Trace#6	Trace#7
0	-151.57	-156.353	-150.875	-153.295	-150.702	-154.397	-150.516	-149.037	-148.351	-151.774	-152.568	-157.973	-153.68	-159.419	-160.316	-157.44	-158.406	-159.734			0	-151.918	-155.301	-158.765	-156.442	-152.539	-156.869	-157.343	-156.285	-155.728	-160.219	-158.142	-157.427	-158.563	-158.145	-161.204	-158.558	-156.073	-156.165			0	-153.298	-155.601	-152.985	-151.211	-155.272	-154.378	-154.111
0.1	-151.385	-155.381	-150.817	-153.072	-150.334	-154.446	-150.631	-150.02	-149.25	-151.381	-152.157	-157.775	-153.42	-158.938	-161.213	-156.982	-158.846	-159.528			0.1	-152.157	-155.41	-158.09	-155.728	-153.348	-156.636	-157.955	-156.402	-155.391	-159.774	-159.19	-157.433	-158.367	-158.486	-160.865	-158.927	-156.747	-157.04			0.1	-152.523	-156.239	-153.472	-151.589	-155.294	-154.342	-153.555
0.2	-151.279	-154.388	-150.537	-152.826	-149.774	-154.568	-150.182	-150.912	-149.687	-150.483	-151.519	-156.681	-153.265	-158.544	-161.601	-157.126	-159.195	-160.08			0.2	-152.545	-155.325	-157.438	-155.047	-154.369	-156.455	-158.446	-156.307	-155.279	-159.097	-159.761	-157.128	-158.422	-158.619	-160.413	-159.38	-157.168	-157.498			0.2	-152.092	-156.539	-153.919	-152.278	-155.185	-154.341	-153.017
0.3	-151.566	-153.988	-150.443	-152.451	-149.309	-154.227	-149.64	-150.919	-149.413	-149.531	-150.675	-155.175	-153.27	-158.278	-161.151	-157.624	-159.34	-161.03			0.3	-153.232	-155.175	-157.247	-154.768	-155.136	-156.244	-158.425	-155.734	-155.686	-158.547	-159.374	-156.769	-158.656	-158.553	-159.951	-159.75	-157.146	-157.57			0.3	-152.301	-156.296	-154.289	-153.001	-154.734	-154.336	-152.722
0.4	-152.402	-154.132	-150.559	-152.089	-149.446	-153.454	-149.828	-150.153	-149.166	-148.895	-149.663	-154.483	-153.015	-158.198	-159.995	-157.681	-159.668	-161.541			0.4	-153.889	-155.237	-157.598	-154.903	-155.218	-155.906	-158.096	-155.103	-156.492	-158.337	-158.455	-156.796	-158.702	-158.185	-159.38	-160.253	-157.157	-157.707			0.4	-153.126	-155.928	-154.81	-153.278	-154.266	-154.378	-152.579
0.5	-153.478	-154.212	-150.371	-152.087	-150.181	-152.616	-150.405	-149.537	-149.612	-148.77	-149.235	-154.937	-152.424	-158.116	-158.676	-157.234	-160.226	-161.317			0.5	-153.988	-155.467	-158.222	-155.307	-154.821	-155.329	-158.052	-155	-156.871	-158.336	-157.821	-157.334	-158.395	-157.592	-158.669	-160.921	-157.548	-157.836			0.5	-153.837	-155.762	-155.236	-153.086	-154.412	-154.386	-152.433
0.6	-153.91	-154.161	-150.408	-152.56	-151.061	-152.029	-150.756	-149.634	-150.445	-149.532	-150.078	-155.736	-152.2	-157.707	-158.103	-157.185	-160.806	-160.59			0.6	-153.66	-155.718	-158.673	-156.035	-154.45	-154.492	-158.534	-155.277	-156.502	-158.396	-157.521	-158.222	-158.094	-157.412	-158.289	-161.265	-157.763	-157.818			0.6	-153.836	-155.461	-154.913	-153.041	-155.109	-154.611	-152.486
0.7	-152.968	-154.021	-151.539	-153.191	-151.598	-151.991	-151.197	-149.926	-151.061	-150.261	-151.404	-156.013	-152.532	-156.789	-158.579	-157.576	-161.241	-159.834			0.7	-153.452	-155.997	-158.457	-156.829	-154.239	-153.893	-159.072	-155.338	-155.768	-158.617	-156.935	-159.091	-158.009	-157.94	-158.529	-161.016	-157.341	-157.945			0.7	-153.406	-154.664	-153.77	-153.531	-155.513	-155.177	-152.807
0.8	-151.588	-153.703	-153.141	-153.593	-151.49	-152.875	-152.184	-149.777	-151.417	-149.872	-152.529	-155.868	-153.163	-155.831	-159.529	-157.901	-161.164	-160.044			0.8	-153.526	-156.217	-157.705	-157.206	-154.351	-154.094	-159.16	-155.193	-155.035	-159.07	-156.112	-159.633	-158.044	-158.808	-159.261	-160.449	-156.837	-158.188			0.8	-153.469	-154.052	-152.598	-154.333	-155.417	-155.416	-153.389
0.9	-151.091	-153.2	-153.38	-153.11	-150.749	-154.137	-153.07	-149.407	-151.657	-149.153	-153.214	-155.761	-153.569	-155.603	-160.065	-157.903	-160.455	-161.182			0.9	-153.561	-156.475	-156.982	-156.94	-154.553	-154.902	-158.875	-155.202	-154.68	-159.294	-155.878	-159.7	-158.239	-159.685	-160.17	-159.873	-156.661	-158.084			0.9	-154.315	-154.222	-152.185	-154.796	-155.075	-154.821	-153.995
1	-151.702	-152.901	-151.926	-151.697	-149.864	-154.428	-153.051	-149.189	-151.721	-149.134	-153.056	-155.759	-153.457	-156.282	-159.889	-157.29	-159.721	-161.829			1	-153.276	-156.961	-156.592	-156.19	-154.331	-155.47	-158.769	-155.436	-154.994	-159.019	-156.467	-159.332	-158.597	-160.469	-160.92	-159.579	-156.498	-157.607			1	-155.354	-154.799	-152.649	-154.366	-154.617	-153.968	-154.256
1.1	-152.937	-153.464	-150.36	-150.818	-149.513	-153.259	-152.658	-148.938	-151.396	-149.435	-152.563	-155.488	-153.083	-157.166	-159.668	-156.339	-159.151	-161.282			1.1	-152.849	-157.126	-156.538	-155.273	-154.054	-155.364	-159.302	-155.84	-155.8	-158.572	-157.224	-158.763	-158.715	-160.81	-161.252	-159.781	-156.187	-157.052			1.1	-156.034	-155.263	-153.348	-153.063	-154.274	-153.589	-154.169
1.2	-153.95	-154.383	-150.08	-151.512	-150.004	-151.789	-152.655	-148.702	-151.023	-149.755	-152.788	-154.95	-152.85	-157.655	-160.295	-156.026	-158.635	-160.292			1.2	-152.772	-156.716	-156.66	-154.65	-154.333	-155.226	-160.105	-156.209	-156.753	-158.456	-157.907	-158.401	-158.39	-160.467	-160.918	-160.31	-156.014	-156.755			1.2	-156.175	-155.68	-153.61	-151.755	-154.094	-153.736	-153.887
1.3	-153.848	-154.49	-150.925	-152.551	-150.722	-151.433	-152.391	-148.438	-151.132	-150.356	-153.379	-154.716	-153.179	-157.682	-161.568	-156.614	-158.499	-159.796			1.3	-153.082	-156.228	-156.838	-154.734	-154.793	-155.522	-160.459	-156.065	-157.392	-158.91	-158.657	-158.421	-158.032	-159.579	-160.076	-160.767	-156.282	-156.998			1.3	-155.74	-156.11	-153.56	-151.539	-153.864	-154.179	-153.6
1.4	-153.22	-154.094	-151.3	-152.465	-151.122	-152.054	-151.175	-148.069	-151.253	-150.862	-153.339	-155.021	-153.661	-157.519	-162.126	-157.335	-159.037	-159.751			1.4	-153.537	-155.721	-157.269	-155.433	-154.661	-155.91	-160.194	-155.451	-157.144	-159.449	-159.051	-158.724	-158.217	-158.572	-159.516	-160.935	-156.803	-157.624			1.4	-154.89	-156.357	-153.792	-152.513	-153.777	-154.69	-153.658
1.5	-153.382	-154.03	-150.289	-151.826	-151.233	-152.416	-149.714	-148.24	-150.815	-150.713	-152.898	-155.328	-153.233	-157.457	-160.972	-157.706	-159.918	-159.619			1.5	-154.127	-154.988	-158.01	-156.071	-154.084	-156.28	-159.494	-155.194	-156.164	-159.362	-158.519	-159.022	-158.884	-158.04	-159.758	-160.737	-156.882	-158.174			1.5	-154.106	-156.347	-154.436	-153.552	-154.291	-154.708	-154.029
1.6	-154.033	-154.129	-148.788	-151.797	-150.871	-152.129	-149.069	-149.014	-150.197	-150.079	-152.607	-155.096	-151.999	-157.226	-158.958	-157.772	-160.466	-159.708			1.6	-154.429	-154.512	-158.646	-156.504	-153.517	-156.816	-158.642	-155.847	-155.497	-158.971	-157.262	-159.009	-159.388	-158.4	-160.532	-160.158	-156.312	-158.371			1.6	-153.947	-155.82	-154.876	-153.591	-155.328	-154.01	-154.261
1.7	-154.13	-154.128	-147.766	-152.556	-150.076	-151.885	-149.334	-149.064	-149.833	-149.437	-152.347	-154.623	-151.133	-156.629	-158.01	-157.791	-160.411	-160.463			1.7	-154.039	-154.771	-158.747	-157.122	-153.029	-157.236	-158.084	-156.827	-155.814	-158.998	-156.401	-158.754	-159.43	-159.43	-161.126	-159.563	-155.869	-158.139			1.7	-154.341	-154.708	-154.622	-152.866	-156.416	-153.207	-154.287
1.8	-153.453	-154.114	-147.43	-153.521	-149.626	-152.143	-149.829	-148.144	-149.804	-149.287	-152.012	-154.473	-151.017	-156.116	-158.536	-158.196	-160.296	-161.246			1.8	-153.357	-155.039	-158.271	-157.536	-152.741	-157.243	-158.351	-156.99	-156.447	-159.041	-156.705	-158.371	-159.162	-160.147	-160.876	-159.601	-156.33	-157.772			1.8	-154.668	-153.785	-154.002	-152.257	-157.146	-152.965	-154.368
1.9	-152.416	-153.968	-147.478	-153.857	-149.84	-152.606	-150.288	-147.846	-149.917	-149.76	-151.629	-154.5	-151.006	-156.031	-159.374	-159.06	-160.646	-161.247			1.9	-152.92	-154.758	-157.673	-157.144	-152.652	-157.107	-159.266	-156.153	-156.385	-158.611	-157.54	-157.893	-158.696	-159.875	-159.867	-160.342	-157.344	-157.744			1.9	-154.675	-153.661	-153.526	-151.956	-157.14	-153.386	-154.299
2	-151.535	-153.747	-147.406	-153.178	-150.008	-152.998	-151.095	-148.71	-150.057	-150.07	-151.452	-154.22	-150.857	-156.197	-160.055	-159.59	-161.059	-160.983			2	-152.978	-154.815	-157.484	-156.404	-152.787	-157.075	-159.939	-155.296	-156.06	-158.239	-158.008	-157.502	-158.191	-159.119	-159.118	-161.067	-157.831	-157.802			2	-154.621	-154.128	-153.283	-151.914	-156.507	-153.949	-153.711
2.1	-151.23	-153.744	-147.308	-152.074	-150.026	-153.306	-152.154	-149.664	-150.425	-149.834	-151.789	-153.667	-151.173	-156.588	-160.677	-158.718	-160.83	-161.494			2.1	-153.435	-155.512	-157.588	-156.24	-153.292	-157.108	-160.102	-155.167	-156.482	-158.289	-158.061	-157.285	-157.937	-158.855	-159.348	-161.432	-157.286	-157.575			2.1	-154.673	-154.946	-153.054	-152.502	-155.676	-154.144	-152.894
2.2	-151.784	-153.973	-147.734	-151.196	-150.632	-153.056	-153.252	-150.209	-150.536	-149.901	-152.135	-153.158	-152.216	-157.268	-160.834	-156.636	-160.161	-162.501			2.2	-153.821	-155.99	-157.586	-156.787	-153.853	-157.156	-159.905	-155.547	-157.317	-158.48	-157.965	-157.174	-158.307	-159.34	-159.843	-161.687	-156.318	-157.39			2.2	-154.767	-156.067	-152.619	-153.533	-154.819	-154.17	-152.556
2.3	-152.671	-154.362	-148.62	-150.757	-151.552	-152.213	-154.319	-150.572	-149.863	-150.421	-151.656	-152.613	-153.106	-157.553	-160.398	-155.133	-159.895	-162.793			2.3	-153.879	-156.112	-157.557	-157.351	-154.124	-156.872	-159.12	-155.901	-157.606	-158.756	-157.966	-156.997	-159.319	-160.125	-159.95	-161.827	-155.639	-157.408			2.3	-154.813	-157.243	-152.257	-154.231	-154.141	-154.289	-153.079
2.4	-152.933	-154.672	-149.532	-151.202	-152.004	-151.588	-154.646	-150.415	-149.276	-150.489	-150.596	-152.365	-152.911	-157.148	-159.791	-155.284	-160.101	-161.882			2.4	-153.752	-156.399	-157.34	-157.318	-154.224	-156.055	-158.036	-156.176	-157.453	-159.088	-158.19	-156.57	-160.417	-160.806	-160.183	-161.624	-155.526	-157.308			2.4	-154.645	-157.805	-152.543	-154.428	-153.772	-154.351	-154.104
2.5	-152.462	-154.636	-150.335	-152.087	-151.951	-151.484	-153.866	-149.25	-149.565	-150.302	-150.288	-152.944	-152.099	-157.021	-159.405	-156.089	-160.19	-160.463			2.5	-153.56	-156.757	-156.625	-156.745	-154.121	-155.194	-157.51	-156.523	-157.492	-159.105	-158.482	-156.185	-161.092	-160.984	-160.58	-161.049	-156.166	-157.081			2.5	-154.242	-157.282	-153.295	-154.143	-153.528	-154.226	-154.727
2.6	-151.998	-154.617	-150.957	-152.104	-151.453	-151.399	-152.679	-147.802	-150.445	-150.904	-151.41	-153.897	-151.754	-157.498	-159.414	-156.65	-159.943	-159.741			2.6	-153.349	-156.68	-155.907	-156.174	-153.464	-154.771	-157.966	-156.937	-157.556	-158.996	-158.677	-156.328	-161.143	-160.472	-160.486	-160.363	-157.257	-156.984			2.6	-153.983	-156.226	-153.735	-153.249	-153.214	-153.894	-154.597
2.7	-152.04	-154.827	-151.056	-151.473	-150.616	-150.945	-151.835	-147.316	-151.266	-151.769	-152.977	-154.551	-152.146	-157.9	-159.544	-157.038	-159.616	-160.113			2.7	-152.948	-156.204	-155.999	-156.094	-152.489	-154.826	-159.213	-157.328	-157.166	-159.395	-158.628	-156.82	-160.406	-159.609	-160.117	-159.735	-158.023	-157.088			2.7	-154.195	-155.59	-153.655	-152.537	-152.688	-153.421	-154.186
2.8	-152.331	-154.74	-150.478	-151.356	-149.945	-150.434	-151.245	-147.613	-151.237	-151.464	-153.925	-154.933	-152.524	-157.796	-159.48	-156.95	-159.696	-160.8			2.8	-152.183	-155.913	-156.884	-156.26	-151.954	-155.197	-160.36	-157.304	-156.49	-160.154	-158.054	-157.19	-159.159	-158.753	-160.145	-159.112	-158.121	-157.258			2.8	-154.373	-155.663	-153.439	-152.848	-152.25	-153.086	-153.81
2.9	-152.466	-154.316	-149.89	-151.97	-149.806	-150.471	-150.525	-147.944	-149.993	-150.396	-154.193	-155.31	-152.316	-157.309	-159.569	-156.258	-160.336	-161.059			2.9	-151.465	-155.898	-157.609	-156.22	-152.038	-155.639	-160.358	-156.778	-155.887	-160.584	-157.108	-157.488	-158.351	-157.981	-160.436	-158.75	-157.721	-157.186			2.9	-153.793	-155.952	-153.365	-153.437	-152.555	-153.141	-153.347
3	-152.317	-154.069	-149.797	-152.639	-150.272	-150.903	-149.958	-148.292	-148.285	-150.054	-153.921	-155.651	-152.164	-156.822	-160.175	-155.666	-160.849	-161.25			3	-151.478	-155.703	-157.573	-156.056	-152.375	-155.913	-159.171	-156.47	-155.334	-160.4	-156.265	-157.858	-158.487	-157.454	-160.597	-158.87	-157.19	-156.635			3	-152.918	-156.001	-153.274	-153.37	-153.494	-153.505	-152.899
3.1	-152.183	-153.842	-149.727	-152.714	-151.063	-151.265	-150.286	-148.792	-147.309	-150.438	-153.403	-155.688	-152.57	-156.68	-160.988	-155.859	-160.466	-162.148			3.1	-152.377	-155.423	-157.328	-156.063	-152.731	-156.071	-157.878	-156.832	-154.722	-159.766	-156.052	-158.085	-158.97	-157.517	-160.705	-159.127	-157.092	-155.928			3.1	-152.8	-155.852	-153.246	-152.916	-154.32	-153.79	-152.855
3.2	-152.295	-153.355	-149.417	-152.154	-151.597	-151.766	-151.379	-149.2	-147.438	-150.507	-152.771	-155.282	-152.849	-156.813	-161.334	-156.582	-159.549	-163.096			3.2	-153.369	-155.384	-157.596	-156.481	-152.982	-156.383	-157.464	-157.47	-154.224	-158.938	-156.813	-157.987	-159.179	-157.985	-161.04	-159.253	-157.546	-155.719			3.2	-153.455	-155.686	-153.676	-152.739	-154.538	-153.624	-153.046
3.3	-152.422	-153.133	-149.01	-151.378	-151.481	-152.237	-152.014	-149.274	-148.153	-150.137	-151.876	-154.474	-152.681	-156.912	-160.948	-157.378	-159.224	-162.767			3.3	-153.466	-155.793	-158.21	-157.276	-153.282	-156.84	-157.675	-158.03	-154.206	-158.329	-158.071	-157.669	-159.119	-157.948	-161.48	-159.486	-157.757	-156.256			3.3	-153.956	-155.571	-154.193	-152.999	-154.31	-152.988	-153.051
3.4	-152.449	-153.471	-148.424	-150.563	-151.13	-152.156	-151.719	-149.461	-148.816	-149.85	-151.226	-153.795	-152.61	-157.067	-160.349	-158.177	-159.559	-161.487			3.4	-152.865	-156.798	-158.538	-157.954	-153.689	-157.082	-157.624	-158.274	-154.742	-158.309	-158.854	-157.269	-158.917	-157.364	-161.681	-159.948	-157.251	-157.003			3.4	-153.97	-155.428	-154.235	-153.355	-154.28	-152.571	-153.174
3.5	-152.252	-154.088	-147.685	-149.901	-151.163	-151.866	-151.21	-150.019	-149.151	-150.028	-151.189	-154.158	-152.702	-157.449	-160.019	-158.49	-159.532	-160.739			3.5	-152.462	-157.856	-158.293	-157.84	-153.814	-157.006	-157.46	-157.872	-155.433	-158.609	-158.943	-157.186	-158.724	-157.249	-161.674	-160.331	-156.63	-157.295			3.5	-154.286	-155.26	-154.179	-153.738	-154.59	-153.037	-153.58
3.6	-151.343	-154.703	-147.201	-150.008	-151.291	-151.937	-151.266	-150.11	-149.125	-150.981	-151.183	-155.164	-152.234	-157.733	-160.048	-157.993	-158.938	-161.023			3.6	-152.312	-158.329	-157.639	-156.939	-153.638	-156.837	-157.988	-157.099	-155.991	-158.491	-158.941	-157.734	-158.722	-157.814	-161.743	-160.371	-156.489	-157.326			3.6	-154.953	-155.318	-154.433	-154.375	-154.781	-153.891	-153.777
3.7	-150.105	-154.92	-147.328	-150.906	-151.104	-152.483	-151.986	-149.137	-148.679	-152.257	-150.967	-155.312	-151.255	-157.685	-160.398	-157.41	-158.449	-161.749			3.7	-152.055	-158.215	-157.063	-156.234	-153.628	-156.551	-158.824	-156.578	-156.47	-157.762	-159.197	-158.258	-158.895	-158.296	-161.877	-160.046	-156.585	-157.591			3.7	-155.075	-155.632	-154.778	-154.964	-154.843	-154.178	-153.581
3.8	-150.041	-154.742	-148.226	-151.685	-150.956	-153.12	-152.642	-147.797	-147.964	-152.464	-151.007	-154.416	-151.038	-157.512	-160.667	-157.402	-158.456	-162.405			3.8	-151.951	-157.722	-157.067	-156.296	-153.949	-156.158	-159.105	-156.336	-156.787	-157.016	-159.324	-158.04	-159.09	-158.51	-161.559	-159.648	-156.501	-157.889			3.8	-154.695	-155.608	-155.039	-155.045	-155.183	-153.998	-153.435
3.9	-151.237	-154.722	-149.829	-152.085	-151.11	-153.189	-152.53	-147.124	-147.881	-151.657	-151.402	-153.569	-152.162	-157.458	-160.508	-157.619	-158.922	-162.715			3.9	-152.128	-157.11	-157.564	-156.521	-154.244	-156.107	-159.235	-156.206	-156.757	-156.738	-159.022	-157.357	-159.127	-158.878	-160.816	-159.796	-156.539	-157.995			3.9	-154.494	-154.858	-155.027	-154.728	-155.648	-154.199	-153.797
4	-152.049	-154.91	-151.161	-152.8	-151.2	-152.428	-152.178	-147.314	-148.95	-151.088	-151.918	-153.281	-153.549	-157.731	-160.033	-157.317	-159.622	-162.432			4	-152.191	-156.59	-158.21	-156.25	-154.097	-156.394	-159.697	-156.054	-156.228	-157.011	-158.848	-156.919	-159.011	-159.15	-160.45	-160.545	-156.989	-158.164			4	-154.576	-154.105	-154.377	-154.325	-155.725	-154.664	-154.531
4.1	-151.91	-155.152	-150.927	-153.817	-150.96	-151.149	-152.156	-147.958	-149.917	-150.577	-152.4	-153.284	-154.042	-157.985	-159.541	-156.314	-160.361	-161.563			4.1	-152.118	-156.053	-158.718	-155.644	-153.504	-156.411	-159.744	-155.777	-155.387	-157.653	-159.135	-157.128	-158.914	-159.149	-160.524	-161.074	-157.249	-158.429			4.1	-154.583	-154.213	-153.232	-153.778	-155.327	-154.286	-155.106
4.2	-151.6	-155.548	-149.618	-154.186	-150.804	-150.164	-152.039	-148.669	-149.84	-149.435	-152.636	-153.324	-153.526	-157.515	-159.499	-155.392	-160.801	-160.713			4.2	-152.037	-155.481	-158.72	-155.07	-153.04	-156.306	-159.006	-155.754	-154.881	-158.33	-159.224	-157.721	-158.815	-159.39	-160.344	-160.945	-156.899	-158.577			4.2	-154.304	-154.814	-152.285	-152.96	-154.98	-153.03	-155.067
4.3	-151.481	-156.03	-148.994	-153.441	-151.169	-150.461	-151.923	-149.265	-149.369	-148.227	-152.478	-153.465	-152.398	-156.55	-160.049	-155.623	-160.507	-160.493			4.3	-151.93	-155.246	-158.099	-154.627	-153.251	-156.734	-158.305	-155.908	-155.013	-158.694	-158.714	-158.041	-158.68	-159.887	-159.691	-160.662	-156.454	-158.565			4.3	-153.791	-155.186	-152.15	-152.275	-155.205	-152.129	-154.257
4.4	-151.317	-156.056	-149.557	-152.162	-151.885	-151.984	-152.268	-149.653	-148.8	-148.116	-151.961	-153.917	-151.225	-155.683	-160.632	-157.073	-159.778	-160.757			4.4	-151.861	-155.445	-157.005	-154.666	-153.822	-157.214	-158.094	-155.669	-155.421	-158.74	-158.057	-158.064	-158.786	-160.088	-159.11	-160.564	-156.55	-158.279			4.4	-153.244	-155.522	-152.733	-152.343	-155.749	-152.031	-153.107
4.5	-151.029	-155.147	-150.364	-151.065	-152.598	-153.623	-152.544	-149.617	-148.201	-149.029	-151.193	-154.544	-150.751	-155.286	-160.909	-158.77	-159.355	-161.05			4.5	-151.812	-155.764	-156.028	-155.478	-154.06	-156.811	-157.818	-155.337	-155.54	-158.882	-157.689	-158.226	-159.211	-159.871	-159.229	-160.463	-157.32	-157.951			4.5	-152.932	-155.923	-153.192	-153.179	-155.792	-152.115	-152.205
4.6	-151.047	-153.922	-150.365	-150.658	-152.793	-154.697	-152.095	-149.227	-148.146	-149.735	-150.273	-154.706	-151.059	-155.694	-161.07	-159.534	-159.241	-161.409			4.6	-151.886	-156.099	-155.982	-156.56	-153.889	-156.089	-157.35	-155.657	-154.956	-159.43	-157.504	-158.372	-159.736	-159.537	-159.869	-160.35	-158.254	-158.088			4.6	-153.09	-155.834	-153.037	-153.979	-155.124	-152.316	-151.969
4.7	-151.695	-153.643	-149.47	-151.403	-151.987	-155.185	-151.336	-148.805	-148.734	-149.979	-149.292	-154.352	-151.593	-156.566	-161.13	-159.045	-159.172	-162.195			4.7	-152.099	-156.359	-156.631	-156.948	-153.748	-156.067	-157.438	-156.641	-153.818	-160.104	-157.478	-158.066	-160.108	-159.202	-160.288	-160.244	-158.525	-158.419			4.7	-153.803	-155.272	-152.756	-153.853	-154.44	-153.057	-152.595
4.8	-152.271	-154.47	-148.673	-152.642	-150.607	-154.897	-151.195	-148.647	-149.448	-150.606	-148.435	-154.293	-152.054	-157.342	-160.885	-157.966	-159.365	-163.12			4.8	-152.124	-156.31	-156.927	-156.301	-153.852	-156.29	-158.174	-157.506	-152.938	-160.107	-157.935	-157.457	-160.032	-158.706	-160.347	-160.255	-158.061	-158.102			4.8	-154.769	-154.656	-152.961	-152.987	-154.37	-153.926	-153.693
4.9	-152.208	-155.417	-148.614	-152.997	-149.592	-154.089	-151.892	-149.112	-149.71	-151.572	-148.381	-154.998	-152.321	-157.952	-160.441	-156.768	-159.808	-163.38			4.9	-151.678	-156.085	-156.711	-155.193	-153.989	-155.782	-158.8	-157.584	-152.939	-159.18	-158.59	-156.955	-159.484	-158.171	-160.463	-160.542	-157.613	-156.974			4.9	-155.169	-154.257	-153.236	-152.424	-154.701	-154.185	-154.438
5	-152.212	-155.801	-148.956	-152.53	-149.788	-153.571	-152.513	-150.043	-149.223	-151.843	-149.672	-155.915	-152.329	-158.461	-159.952	-156.007	-160.005	-162.775			5	-151.014	-156.202	-156.639	-154.267	-153.782	-154.842	-159.01	-157.073	-153.501	-158.278	-158.776	-156.642	-158.885	-157.852	-160.771	-160.756	-157.563	-155.857			5	-154.642	-154.266	-152.849	-152.592	-154.847	-153.932	-154.471
5.1	-152.641	-155.668	-149.32	-152.423	-150.95	-153.283	-152.28	-150.561	-148.417	-151.204	-151.427	-156.022	-152.137	-158.801	-159.529	-156.683	-159.741	-161.818			5.1	-150.736	-156.808	-156.879	-153.997	-153.349	-154.452	-159.022	-156.659	-154.026	-158.045	-158.731	-156.639	-158.777	-157.558	-161.087	-160.627	-157.54	-155.484			5.1	-153.932	-154.37	-152.131	-153.022	-154.645	-153.83	-154.183
5.2	-152.63	-155.348	-149.382	-153.005	-151.804	-152.672	-151.587	-150.031	-148.182	-150.616	-152.205	-155.116	-152.292	-158.556	-159.424	-158.406	-159.436	-160.972			5.2	-151.022	-157.384	-157.234	-154.691	-153.313	-154.719	-158.995	-156.556	-154.453	-158.042	-158.909	-156.924	-159.067	-157.242	-161.404	-160.506	-157.361	-155.587			5.2	-153.771	-154.122	-151.925	-153.281	-154.398	-153.953	-153.976
5.3	-151.897	-154.96	-148.8	-153.504	-152.214	-151.986	-151.268	-148.759	-148.918	-150.191	-151.607	-154.453	-153.494	-157.633	-159.398	-159.423	-159.41	-160.412			5.3	-151.36	-157.458	-157.662	-155.818	-153.73	-155.066	-159.142	-156.382	-154.907	-158.033	-159.038	-156.986	-159.144	-157.489	-161.9	-160.559	-157.228	-155.77			5.3	-154.191	-153.694	-152.448	-153.261	-154.628	-153.781	-153.952
5.4	-151.266	-154.434	-147.831	-153.293	-153.04	-151.809	-151.343	-147.923	-149.939	-149.103	-150.625	-155.021	-155.187	-156.598	-159.262	-158.814	-159.454	-160.048			5.4	-151.32	-157.193	-158.03	-156.325	-153.959	-155.07	-159.555	-156.203	-155.245	-158.064	-158.821	-156.709	-158.89	-158.425	-162.336	-160.443	-157.122	-156.105			5.4	-154.691	-153.462	-153.312	-153.042	-155.29	-153.347	-154.172
5.5	-151.272	-154.138	-147.177	-152.629	-153.926	-151.99	-151.237	-148.302	-150.468	-147.976	-150.534	-155.917	-155.883	-155.725	-159.379	-157.069	-159.459	-159.741			5.5	-151.189	-156.989	-158.097	-156.33	-153.928	-154.596	-159.734	-156.486	-155.377	-157.821	-158.238	-156.759	-158.761	-159.22	-162.155	-159.988	-156.932	-156.496			5.5	-154.641	-153.544	-154.003	-152.814	-155.607	-153.248	-154.486
5.6	-151.569	-154.497	-147.43	-152.338	-153.438	-152.027	-150.736	-149.104	-150.604	-148.242	-151.22	-155.976	-155.25	-155.151	-159.608	-155.655	-159.569	-159.702			5.6	-151.324	-156.917	-157.865	-156.604	-154.04	-154.056	-159.39	-156.868	-155.193	-157.359	-157.5	-157.408	-158.969	-159.415	-161.468	-159.356	-156.665	-156.562			5.6	-154.138	-153.742	-154.26	-152.611	-155.363	-153.653	-154.587
5.7	-151.564	-155.351	-148.786	-152.694	-151.466	-152.105	-150.154	-149.249	-150.685	-149.629	-151.585	-155.33	-154.329	-155.141	-159.507	-155.717	-159.478	-160.165			5.7	-151.606	-156.85	-157.558	-156.997	-154.215	-153.997	-159.096	-156.772	-154.517	-157.181	-157.115	-157.827	-159.214	-159.201	-161.096	-158.907	-156.512	-156.092			5.7	-153.859	-153.773	-154.32	-152.5	-154.842	-154.226	-154.443
5.8	-151.459	-156.095	-150.296	-153.126	-149.764	-152.27	-149.575	-149.235	-150.504	-150.757	-151.397	-154.724	-153.714	-155.421	-159.366	-156.602	-158.93	-160.945			5.8	-151.924	-156.7	-157.323	-157.25	-154.115	-154.477	-159.208	-156.448	-153.579	-157.267	-157.176	-157.359	-158.833	-158.797	-161.334	-159.072	-156.796	-155.47			5.8	-153.944	-153.741	-154.512	-152.931	-154.28	-154.558	-154.12
5.9	-151.903	-156.177	-150.458	-153.222	-149.712	-152.028	-149.28	-149.889	-149.486	-151.286	-151.133	-154.58	-153.073	-155.731	-159.443	-157.275	-158.585	-161.593			5.9	-152.251	-156.436	-157.162	-157.557	-153.731	-155.222	-159.546	-156.425	-153.137	-157.275	-157.156	-156.626	-157.761	-158.454	-161.706	-159.839	-157.338	-155.311			5.9	-153.88	-153.88	-154.659	-153.919	-153.907	-154.77	-153.809
6	-152.533	-155.53	-149.421	-152.759	-151.166	-151.856	-149.843	-150.322	-148.053	-151.58	-150.793	-154.735	-152.294	-156.039	-159.369	-157.847	-158.944	-161.987			6	-152.555	-156.217	-157.027	-157.591	-153.448	-156.008	-159.784	-156.599	-153.582	-157.358	-156.837	-156.483	-157.025	-158.229	-161.869	-160.671	-157.369	-155.583			6	-153.432	-154.174	-154.509	-154.449	-153.621	-155.208	-154.101
6.1	-152.594	-154.788	-148.69	-151.77	-152.955	-152.431	-150.805	-149.56	-147.628	-151.659	-150.242	-154.887	-151.933	-156.341	-159.023	-158.431	-159.429	-162.201			6.1	-152.846	-156.236	-157.031	-156.819	-153.471	-156.561	-159.469	-156.559	-154.529	-157.855	-156.484	-156.72	-157.314	-158.261	-161.793	-161.12	-156.836	-155.819			6.1	-152.998	-154.534	-154.234	-153.913	-153.584	-155.558	-155.007
6.2	-152.469	-154.447	-149.134	-151.034	-153.703	-152.963	-151.351	-148.464	-148.183	-151.486	-149.892	-155.114	-152.452	-157.081	-159.035	-158.492	-159.514	-162.094			6.2	-152.986	-156.412	-157.315	-155.88	-153.556	-156.479	-158.681	-156.406	-155.304	-158.444	-156.448	-156.678	-158.089	-158.99	-161.691	-161.162	-156.581	-155.96			6.2	-153.06	-154.854	-153.752	-152.837	-154.285	-155.309	-155.648
6.3	-152.377	-154.154	-150.301	-151.215	-152.898	-152.833	-151.529	-148.155	-148.256	-151.139	-149.98	-155.502	-152.991	-158.137	-159.845	-158.079	-159.309	-161.432			6.3	-152.726	-156.614	-157.681	-155.755	-153.556	-155.847	-158.06	-156.314	-155.32	-158.58	-156.731	-156.296	-158.544	-160.33	-161.718	-160.997	-156.808	-156.254			6.3	-153.499	-155.157	-152.949	-152.08	-155.262	-154.517	-155.62
6.4	-151.62	-153.56	-151.077	-152.231	-151.475	-152.824	-151.706	-148.622	-147.693	-150.738	-150.26	-155.655	-152.714	-158.179	-160.795	-157.638	-158.725	-160.572			6.4	-152.172	-156.596	-157.697	-156.205	-153.468	-155.325	-157.783	-156.173	-154.808	-158.226	-156.956	-156.003	-158.641	-161.322	-161.61	-161.014	-157.019	-156.781			6.4	-153.719	-155.547	-152.366	-151.993	-155.51	-153.681	-155.418
6.5	-150.406	-153.155	-150.776	-153.344	-150.822	-153.309	-151.902	-149.565	-147.471	-150.355	-150.731	-155.083	-152.525	-156.915	-161.216	-157.274	-157.747	-160.347			6.5	-151.893	-156.123	-157.36	-156.439	-153.467	-155.062	-157.66	-156.151	-154.606	-157.669	-157.144	-156.226	-158.89	-161.227	-161.104	-161.498	-157.083	-157.355			6.5	-153.561	-155.815	-152.253	-152.09	-154.908	-153.279	-155.281
6.6	-149.817	-153.465	-149.779	-153.608	-151.297	-153.517	-151.958	-150.494	-147.908	-150.065	-151.498	-154.279	-152.943	-155.956	-161.435	-157.23	-157.553	-160.513			6.6	-152.25	-155.601	-156.967	-156.326	-153.899	-154.966	-157.773	-156.433	-154.924	-157.133	-157.727	-156.939	-159.41	-160.489	-160.268	-161.968	-157.171	-157.501			6.6	-153.534	-155.45	-152.207	-152.177	-154.047	-153.271	-154.705
6.7	-150.354	-153.925	-149.183	-152.923	-152.011	-153.17	-151.729	-150.757	-148.659	-150.139	-152.157	-154.143	-153.339	-156.359	-161.288	-157.643	-158.993	-160			6.7	-152.802	-155.621	-156.562	-156.128	-154.656	-155.111	-158.235	-156.71	-155.249	-156.899	-158.626	-157.494	-159.746	-160.029	-159.496	-161.714	-157.198	-157			6.7	-154.012	-154.348	-152.049	-152.724	-153.465	-153.189	-153.626
6.8	-151.414	-154.033	-149.678	-152.287	-152.037	-152.694	-151.303	-150.614	-149.426	-150.299	-152.093	-154.783	-153.596	-157.48	-160.204	-158.004	-160.745	-159.348			6.8	-153.024	-156.093	-156.289	-156.091	-155.196	-155.285	-158.54	-156.554	-154.962	-157.19	-159.194	-157.405	-159.481	-159.882	-159.354	-160.881	-157.125	-156.483			6.8	-154.472	-153.188	-151.873	-153.21	-153.35	-152.748	-152.984
6.9	-152.115	-154.505	-150.642	-152.605	-151.665	-152.409	-151.074	-150.601	-150.371	-149.981	-151.631	-155.62	-153.803	-158.328	-158.918	-157.769	-160.847	-159.995			6.9	-152.958	-156.324	-156.33	-156.527	-155.234	-155.415	-158.154	-156.24	-154.116	-157.825	-158.901	-157.052	-158.607	-159.544	-159.846	-160.1	-157.186	-156.608			6.9	-154.174	-152.722	-151.824	-152.838	-153.431	-152.13	-153.166
7	-152.82	-155.601	-151.016	-153.285	-151.742	-152.36	-151.492	-150.439	-151.509	-149.735	-151.421	-155.522	-153.872	-158.243	-158.441	-157.118	-159.436	-161.617			7	-152.707	-156.044	-156.455	-157.187	-154.864	-155.643	-157.464	-156.595	-153.383	-158.481	-158.068	-157.173	-157.628	-159.04	-160.25	-159.65	-157.299	-157.291			7	-153.493	-152.847	-152.196	-152.339	-153.453	-152.083	-153.455
7.1	-154.159	-156.444	-150.658	-152.968	-152.104	-152.275	-152.466	-150.166	-151.703	-150.133	-151.095	-154.092	-153.855	-157.228	-158.53	-156.903	-158.205	-162.658			7.1	-152.27	-155.883	-156.724	-157.257	-154.479	-155.874	-157.074	-157.702	-153.156	-158.873	-157.672	-157.779	-157.273	-158.691	-160.462	-159.562	-157.131	-158.026			7.1	-153.347	-153.086	-152.897	-152.561	-153.578	-153.215	-153.636
7.2	-155.217	-156.28	-150.158	-151.734	-151.852	-151.9	-153.14	-150.167	-150.238	-150.537	-150.259	-152.902	-153.729	-156.266	-158.858	-157.462	-157.858	-162.464			7.2	-151.846	-156.292	-157.358	-156.675	-154.648	-156.031	-157.079	-158.581	-153.29	-158.735	-157.927	-158.115	-157.594	-158.514	-161.066	-159.809	-156.772	-158.213			7.2	-153.636	-153.338	-153.353	-153.129	-153.877	-154.965	-154.153
7.3	-154.649	-155.311	-149.827	-151.011	-150.692	-151.083	-153.017	-150.397	-148.604	-150.493	-149.591	-153.072	-153.493	-156.276	-159.48	-157.97	-158.214	-161.85			7.3	-151.589	-156.801	-157.853	-156.095	-155.252	-156.171	-157.442	-158.33	-153.554	-158.127	-158.041	-157.829	-157.949	-158.352	-161.762	-160.18	-156.605	-157.556			7.3	-153.652	-153.579	-153.673	-153.657	-153.984	-156.041	-154.7
7.4	-152.623	-154.423	-149.563	-151.481	-149.599	-149.96	-152.473	-150.892	-148.589	-150.489	-149.615	-153.717	-153.479	-157.212	-160.111	-157.731	-158.916	-161.954			7.4	-151.48	-156.751	-157.779	-155.825	-155.492	-156.388	-158.153	-157.278	-153.889	-157.783	-157.805	-157.237	-158.212	-158.068	-161.827	-160.454	-156.721	-156.548			7.4	-153.384	-153.79	-154.28	-154.4	-153.724	-155.744	-154.829
7.5	-150.697	-154.126	-149.485	-152.195	-149.757	-149.312	-151.874	-151.653	-149.782	-150.822	-149.997	-154.195	-153.643	-158.144	-160.166	-157.194	-159.331	-162.549			7.5	-151.585	-156.074	-157.469	-155.909	-155.2	-156.76	-158.755	-156.522	-154.393	-158.27	-157.874	-156.743	-158.819	-157.73	-161.288	-160.57	-157.029	-155.838			7.5	-153.269	-154.013	-154.6	-155.182	-153.506	-154.651	-154.838
7.6	-150.085	-154.272	-149.718	-152.237	-150.64	-150.088	-151.342	-151.975	-150.423	-151.253	-150.526	-155.004	-153.449	-158.066	-159.627	-157.087	-159.203	-162.437			7.6	-151.883	-155.333	-157.092	-156.421	-154.887	-157.004	-158.814	-156.278	-154.918	-159.02	-158.364	-156.5	-159.534	-157.627	-160.656	-160.452	-157.554	-155.56			7.6	-153.363	-154.162	-153.991	-155.387	-153.805	-153.858	-154.944
7.7	-150.761	-154.701	-149.717	-152.215	-151.083	-151.708	-150.864	-151.297	-149.655	-151.425	-151.356	-155.868	-153.024	-157.002	-159.319	-157.479	-159.107	-161.654			7.7	-152.023	-155.137	-156.744	-157.209	-154.732	-156.72	-158.745	-156.081	-155.029	-159.135	-158.667	-156.457	-159.669	-157.937	-160.471	-160.129	-158.104	-155.777			7.7	-153.334	-154.364	-152.89	-155.107	-154.481	-153.748	-154.905
7.8	-151.864	-155.027	-149.215	-152.868	-151.154	-152.566	-150.497	-150.473	-148.535	-151.083	-152.287	-156.004	-152.922	-155.833	-159.519	-158.088	-159.506	-161.273			7.8	-151.808	-155.584	-156.764	-157.904	-154.586	-156.113	-158.904	-156.06	-154.934	-158.636	-158.364	-156.553	-159.262	-158.621	-160.895	-159.778	-158.153	-156.344			7.8	-153.118	-154.827	-152.128	-154.87	-154.965	-153.964	-154.462
7.9	-152.543	-154.829	-148.776	-153.156	-151.062	-152.641	-150.7	-150.485	-148.682	-150.356	-152.646	-155.417	-153.337	-155.316	-159.832	-158.628	-160.087	-161.718			7.9	-151.44	-156.07	-157.105	-158.074	-154.589	-155.797	-158.844	-156.347	-155.411	-158.125	-157.807	-156.547	-158.78	-159.289	-161.334	-159.269	-157.816	-156.677			7.9	-152.936	-155.266	-152.092	-154.699	-155.057	-154.119	-153.671
8	-152.613	-154.499	-148.543	-151.904	-150.66	-152.838	-151.54	-150.973	-150.055	-149.526	-152.298	-154.314	-154.066	-155.59	-160.012	-158.588	-160.431	-162.239			8	-151.33	-156.024	-157.431	-157.601	-154.748	-155.924	-158.38	-156.496	-156.459	-157.863	-157.895	-156.333	-158.427	-159.377	-161.19	-158.371	-157.767	-156.473			8	-152.89	-155.192	-152.676	-154.242	-154.979	-154.162	-152.916
8.1	-152.192	-154.524	-148.181	-150.146	-150.247	-153.291	-152.124	-151.227	-151.269	-148.872	-151.642	-153.308	-154.697	-156.434	-159.917	-157.739	-160.73	-161.966			8.1	-151.494	-155.737	-157.611	-157.135	-154.578	-156.079	-158.056	-156.577	-157.184	-157.902	-158.69	-156.271	-158.156	-158.963	-160.701	-157.518	-157.973	-155.813			8.1	-152.958	-154.731	-153.312	-153.75	-154.959	-154.338	-152.551
8.2	-151.465	-154.531	-148.132	-149.646	-150.086	-153.674	-151.999	-151.085	-151.294	-148.723	-150.913	-153.292	-155.028	-157.541	-159.541	-156.856	-161.078	-161.18			8.2	-151.331	-155.746	-157.784	-157.333	-154.103	-156.168	-158.141	-156.892	-157.215	-158.124	-159.109	-156.563	-157.776	-158.834	-160.462	-157.437	-157.826	-155.047			8.2	-153.087	-154.429	-153.402	-153.738	-155.066	-154.646	-152.691
8.3	-150.859	-154.029	-148.978	-150.464	-150.435	-153.402	-151.71	-150.58	-150.23	-149.003	-150.469	-153.827	-154.85	-158.319	-159.159	-156.906	-160.922	-160.947			8.3	-150.786	-156.081	-158.019	-157.961	-153.998	-156.398	-158.416	-157.008	-156.891	-157.982	-158.611	-157.079	-157.433	-159.196	-160.756	-158.253	-157.28	-154.878			8.3	-153.182	-154.31	-153.35	-153.963	-155.198	-154.74	-153.268
8.4	-150.586	-153.547	-149.908	-151.32	-151.498	-152.576	-151.679	-150.023	-149.243	-149.307	-150.63	-153.872	-154.105	-158.344	-159.117	-157.782	-160.157	-161.669			8.4	-150.515	-156.615	-158.121	-158.164	-154.483	-156.353	-158.984	-156.736	-156.322	-157.303	-157.851	-157.709	-157.585	-159.462	-161.533	-159.52	-156.962	-155.673			8.4	-153.389	-154.214	-154.006	-153.96	-155.313	-154.45	-154.115
8.5	-150.513	-153.874	-149.831	-151.592	-152.656	-152.298	-151.829	-149.884	-149.034	-149.492	-151.108	-153.741	-153.363	-157.984	-159.156	-158.436	-159.286	-162.471			8.5	-150.712	-157.212	-157.942	-157.546	-155.057	-155.441	-159.826	-156.564	-155.649	-156.68	-157.413	-158.103	-158.2	-159.407	-162.41	-160.668	-157.236	-156.843			8.5	-153.954	-154.121	-155.026	-153.685	-155.214	-154.103	-154.999
8.6	-150.858	-154.587	-149.117	-151.661	-152.932	-152.683	-151.781	-150.289	-148.86	-149.795	-151.675	-154.192	-152.739	-157.651	-158.442	-158.098	-158.65	-162.321			8.6	-151.161	-157.596	-157.687	-156.729	-155.221	-154.211	-160.319	-156.717	-155.257	-156.532	-157.314	-157.867	-158.741	-159.259	-162.834	-161.232	-157.783	-157.578			8.6	-154.733	-153.921	-155.5	-153.345	-154.748	-153.99	-155.297
8.7	-151.384	-154.71	-148.295	-151.79	-152.339	-152.654	-151.34	-151.036	-148.307	-150.104	-152.531	-154.867	-151.905	-157.071	-157.227	-157.25	-158.491	-161.209			8.7	-151.811	-157.537	-157.632	-156.529	-154.993	-153.677	-160.154	-156.891	-155.174	-156.748	-157.6	-157.177	-158.953	-159.355	-162.561	-161.101	-157.988	-157.752			8.7	-155.24	-153.854	-155.3	-153.263	-154.338	-153.933	-154.675
8.8	-150.992	-154.381	-147.501	-151.721	-151.61	-152.01	-150.709	-151.739	-148.292	-149.766	-153.169	-154.912	-151.623	-156.004	-156.947	-156.855	-158.892	-160.08			8.8	-152.477	-157.129	-157.72	-156.966	-154.873	-153.92	-159.416	-156.96	-155.129	-157.158	-158.284	-156.512	-159.102	-159.773	-161.759	-160.657	-157.615	-157.597			8.8	-155.108	-154.115	-154.804	-153.45	-154.214	-153.731	-153.892
8.9	-149.964	-154.23	-147.614	-151.468	-151.25	-151.296	-149.939	-151.829	-149.269	-148.989	-152.822	-154.445	-152.714	-154.991	-157.909	-157.05	-159.554	-159.836			8.9	-152.677	-156.768	-157.582	-157.464	-155.335	-154.458	-158.347	-157.001	-154.951	-157.491	-159.029	-156.39	-159.242	-160.168	-160.938	-160.413	-157.021	-157.209			8.9	-154.413	-154.44	-154.39	-153.512	-153.952	-153.533	-153.795
9	-149.834	-154.174	-148.973	-151.447	-151.346	-150.665	-149.193	-151.177	-150.255	-148.828	-152.086	-154.358	-154.242	-154.934	-159.111	-157.215	-160.038	-160.451			9	-152.35	-156.792	-157.257	-157.489	-156.074	-154.944	-157.593	-156.879	-154.676	-157.595	-159.564	-156.903	-159.105	-160.342	-160.578	-160.48	-156.604	-156.575			9	-153.792	-154.578	-154.176	-153.382	-153.238	-153.412	-154.45
9.1	-150.743	-154.255	-150.109	-151.622	-151.66	-150.618	-148.977	-150.723	-150.373	-149.56	-151.791	-154.907	-154.757	-155.984	-159.663	-156.965	-160.152	-161.061			9.1	-152.216	-157.078	-157.314	-156.827	-156.193	-155.326	-157.484	-156.616	-154.592	-157.657	-159.866	-157.573	-158.866	-160.222	-160.519	-160.632	-156.409	-155.866			9.1	-153.721	-154.465	-153.93	-153.342	-152.667	-153.074	-155.433
9.2	-151.526	-154.975	-149.866	-151.576	-152.003	-151.96	-149.39	-150.955	-149.699	-150.295	-151.359	-155.465	-154.025	-157.133	-159.438	-156.541	-160.079	-161.194			9.2	-152.518	-157.214	-157.6	-155.768	-155.564	-155.897	-157.746	-156.424	-154.976	-157.744	-160.058	-158.121	-158.896	-159.701	-160.424	-160.626	-156.398	-155.6			9.2	-153.829	-154.139	-153.651	-153.323	-153.111	-152.551	-155.849
9.3	-151.637	-156.166	-149.025	-151.466	-152.468	-153.871	-150.225	-151.302	-148.726	-150.32	-150.237	-155.284	-152.893	-157.476	-159.001	-156.422	-159.948	-161.314			9.3	-152.533	-157.133	-157.441	-155.222	-155.073	-156.703	-158.222	-156.329	-155.539	-157.639	-160.132	-158.385	-159.23	-159.173	-160.616	-160.328	-156.652	-155.972			9.3	-153.453	-153.843	-153.884	-153.036	-154.454	-152.314	-154.924
9.4	-151.648	-156.87	-148.658	-151.651	-153.1	-154.273	-151.317	-151.699	-147.961	-150.089	-149.301	-154.287	-152.576	-157.332	-159.03	-156.849	-159.733	-161.771			9.4	-151.713	-157.049	-156.984	-155.812	-155.049	-157.312	-158.722	-156.379	-155.503	-157.145	-159.76	-158.23	-159.691	-159.236	-161.216	-159.85	-157.202	-156.518			9.4	-152.7	-153.724	-154.65	-152.621	-155.667	-152.43	-153.333
9.5	-152.164	-156.277	-148.333	-151.666	-153.58	-152.838	-152.131	-152.211	-147.605	-150.209	-149.774	-153.053	-153.376	-157.467	-159.39	-157.41	-159.593	-162.203			9.5	-150.474	-156.943	-156.876	-156.825	-155.033	-157.484	-158.703	-156.502	-154.706	-156.753	-158.911	-157.669	-159.962	-159.849	-161.337	-159.568	-157.814	-156.908			9.5	-152.29	-153.695	-155.292	-152.551	-156.024	-152.706	-152.519
9.6	-152.914	-154.809	-147.496	-151.291	-153.228	-151.097	-152.18	-152.219	-147.718	-150.423	-151.452	-152.579	-153.957	-157.991	-159.503	-157.478	-159.709	-162.237			9.6	-149.763	-156.653	-156.954	-157.149	-154.919	-157.311	-157.966	-156.369	-153.977	-157.02	-157.992	-156.69	-159.714	-160.459	-160.63	-159.67	-158.137	-157.334			9.6	-152.492	-153.817	-155.699	-153.075	-155.706	-153.243	-152.814
9.7	-153.272	-153.72	-147.125	-151.376	-151.944	-150.028	-152.025	-151.49	-148.411	-150.257	-152.692	-153.642	-153.323	-158.215	-159.272	-157.24	-160.188	-161.659			9.7	-149.833	-156.328	-156.622	-156.513	-154.587	-156.87	-157.311	-156.054	-154.032	-157.576	-157.466	-155.907	-159.075	-160.604	-160.131	-159.987	-158.09	-157.937			9.7	-153	-154.35	-155.934	-153.908	-155.33	-153.973	-153.563
9.8	-153.185	-153.354	-147.685	-152.121	-150.722	-149.692	-152.333	-150.592	-149.079	-149.924	-152.702	-155.317	-152.463	-157.862	-158.745	-157.424	-160.766	-160.578			9.8	-150.084	-156.129	-156.149	-155.581	-153.83	-156.308	-157.658	-156.058	-154.785	-158.133	-157.665	-156.131	-158.456	-160.128	-160.496	-160.209	-157.788	-158.266			9.8	-153.448	-154.854	-155.642	-154.516	-154.841	-154.373	-154.121
9.9	-152.769	-153.478	-148.332	-152.423	-150.214	-149.89	-152.727	-150.133	-148.927	-149.918	-152.262	-155.893	-152.619	-157.584	-158.16	-157.93	-160.768	-159.914			9.9	-150.219	-155.811	-156.092	-155.251	-153.195	-156.084	-158.824	-156.451	-155.552	-158.931	-158.282	-157.037	-158.035	-159.421	-161.048	-160.194	-157.221	-157.884			9.9	-153.803	-154.694	-154.766	-154.463	-154.098	-154.209	-154.33
10	-152.334	-153.962	-148.842	-151.89	-150.247	-150.36	-152.579	-150.159	-148.267	-150.074	-151.803	-155.141	-153.544	-157.72	-158.133	-157.817	-160.311	-160.616			10	-150.337	-155.339	-156.264	-155.739	-153.585	-156.491	-159.763	-157	-155.669	-159.618	-158.742	-157.809	-157.984	-159.041	-161.06	-160.122	-156.622	-157.348			10	-154.421	-154.336	-153.878	-153.763	-153.871	-153.913	-154.369
10.1	-152.451	-154.183	-149.299	-151.402	-150.42	-150.761	-152.065	-150.405	-147.952	-150.344	-151.251	-154.051	-154.425	-157.794	-158.724	-156.912	-160.04	-162.121			10.1	-150.33	-155.463	-156.555	-156.689	-154.827	-157.029	-159.772	-157.736	-155.474	-159.384	-158.942	-158.14	-158.418	-159.151	-160.72	-160.255	-156.569	-157.364			10.1	-155.24	-154.377	-153.666	-153.164	-154.281	-154.077	-154.441
10.2	-152.63	-154.03	-149.28	-151.397	-150.412	-150.827	-151.697	-150.746	-148.378	-150.932	-150.853	-153.724	-154.899	-157.555	-159.141	-156.27	-159.987	-162.818			10.2	-150.175	-156.504	-157.201	-157.516	-155.768	-156.932	-159.074	-158.297	-155.631	-158.239	-158.952	-158.035	-158.72	-159.642	-160.678	-160.601	-156.991	-157.6			10.2	-155.245	-154.438	-154.179	-153.303	-154.187	-154.777	-154.654
10.3	-151.781	-154.185	-148.611	-151.427	-150.304	-150.759	-151.463	-150.979	-149.33	-151.512	-150.848	-154.445	-154.758	-157.528	-158.961	-156.37	-159.982	-162.156			10.3	-150.18	-157.494	-157.821	-157.59	-155.711	-156.33	-158.26	-158.198	-156.053	-157.127	-158.827	-157.815	-158.401	-160.351	-160.953	-160.723	-157.455	-157.603			10.3	-154.149	-154.237	-154.912	-153.769	-153.327	-155.409	-154.665
10.4	-150.39	-154.425	-147.87	-151.062	-150.561	-150.921	-151.371	-151.087	-150.23	-152.024	-151.346	-155.251	-153.739	-157.862	-158.752	-156.454	-160.067	-160.895			10.4	-150.554	-157.609	-157.662	-156.932	-154.825	-155.825	-157.815	-157.931	-156.2	-157.018	-158.792	-157.754	-157.912	-161.222	-161.075	-160.377	-157.936	-157.311			10.4	-153.175	-153.96	-155.562	-153.863	-152.829	-155.456	-154.267
10.5	-149.857	-154.222	-148.055	-150.803	-151.651	-151.403	-151.58	-151.342	-150.436	-152.607	-151.973	-155.32	-152.224	-158.068	-158.691	-156.342	-160.37	-160.019			10.5	-151.241	-157.307	-156.825	-156.368	-153.838	-155.45	-157.794	-157.908	-155.903	-157.829	-158.958	-157.826	-157.524	-161.97	-160.917	-159.829	-158.315	-156.813			10.5	-152.846	-153.656	-156.043	-153.724	-153.193	-155.193	-154.094
10.6	-150.251	-153.874	-149.236	-151.236	-153.345	-152.011	-151.759	-151.621	-149.9	-152.671	-152.154	-155.03	-151.255	-158.218	-158.253	-156.666	-161.119	-159.935			10.6	-151.986	-157.057	-156.093	-156.609	-153.483	-155.078	-157.721	-157.606	-155.531	-158.43	-159.314	-157.996	-157.067	-161.94	-160.546	-159.576	-158.359	-156.562			10.6	-152.486	-153.362	-155.964	-153.682	-153.661	-155.158	-154.466
10.7	-150.797	-153.791	-150.405	-151.76	-154.225	-152.34	-151.53	-151.73	-149.506	-152.054	-151.985	-154.831	-151.528	-158.346	-157.568	-157.513	-162.022	-160.267			10.7	-152.386	-156.795	-155.98	-157.264	-153.833	-154.922	-157.503	-156.791	-155.342	-158.39	-159.548	-157.95	-156.67	-161.118	-160.159	-159.944	-158.167	-156.794			10.7	-152.178	-153.391	-154.958	-153.461	-153.749	-155.129	-154.684
10.8	-151.43	-153.917	-150.938	-151.865	-153.161	-152.279	-151.02	-151.809	-149.736	-151.493	-152.042	-154.577	-152.743	-158.04	-157.521	-158.329	-162.14	-160.854			10.8	-152.254	-156.872	-156.642	-157.256	-154.502	-155	-157.559	-156.346	-155.199	-158.231	-159.261	-157.354	-156.64	-160.35	-160.209	-160.469	-158.159	-157.124			10.8	-152.522	-153.798	-153.547	-153.074	-153.918	-154.834	-154.371
10.9	-152.332	-153.991	-150.791	-152.042	-150.975	-152.374	-150.474	-151.352	-150.069	-151.295	-152.309	-154.259	-153.89	-157.677	-158.445	-158.799	-161.329	-161.949			10.9	-151.973	-157.601	-157.692	-156.429	-154.966	-155.252	-157.62	-156.967	-154.963	-158.002	-158.634	-156.642	-157.161	-160.204	-160.652	-160.371	-158.309	-157.295			10.9	-153.272	-154.022	-152.945	-153.159	-154.595	-154.784	-154.227
11	-153.172	-154.291	-150.367	-152.64	-149.405	-153.024	-150.319	-149.99	-149.963	-151.013	-152.16	-154.022	-154.36	-157.846	-159.451	-158.981	-160.459	-163.032			11	-152.025	-158.433	-158.268	-155.666	-154.946	-155.75	-157.253	-157.936	-154.751	-157.582	-158.068	-156.431	-157.933	-160.521	-160.955	-159.785	-158.218	-157.172			11	-153.892	-153.611	-153.497	-153.802	-155.494	-155.194	-154.692
11.1	-153.181	-154.955	-150.204	-153.324	-149.247	-153.835	-151.023	-148.585	-149.154	-150.261	-151.512	-153.812	-153.968	-158.051	-159.448	-158.85	-159.706	-163.143			11.1	-152.4	-158.714	-158.054	-155.403	-154.742	-156.069	-157.107	-158.094	-154.692	-157.386	-157.674	-156.691	-158.404	-160.66	-160.899	-159.336	-158.089	-156.739			11.1	-154.366	-152.892	-154.152	-154.345	-155.917	-155.499	-155.209
11.2	-152.139	-155.36	-150.092	-153.465	-149.967	-154.109	-152.055	-147.983	-148.199	-149.198	-151.068	-153.758	-152.794	-157.645	-158.662	-158.335	-158.776	-162.252			11.2	-152.619	-158.319	-157.698	-155.239	-154.631	-155.599	-157.706	-157.64	-154.692	-157.657	-157.333	-157.143	-158.384	-159.865	-160.644	-159.053	-158.033	-156.413			11.2	-154.779	-152.684	-153.996	-154.435	-155.535	-155.305	-155.119
11.3	-151.179	-154.963	-149.605	-152.975	-150.677	-153.816	-152.249	-148.417	-148.072	-148.441	-151.197	-154.098	-151.727	-156.997	-158.002	-157.382	-158.296	-161.083			11.3	-152.434	-157.605	-157.884	-154.947	-154.521	-154.86	-158.412	-157.505	-154.886	-157.951	-157.034	-157.653	-158.113	-158.339	-160.511	-158.594	-157.718	-156.284			11.3	-155.142	-153.331	-153.367	-154.175	-154.933	-154.779	-154.039
11.4	-151.13	-153.675	-148.884	-152.459	-151.068	-153.713	-151.38	-149.39	-148.813	-148.428	-151.498	-154.823	-151.524	-156.956	-157.772	-156.172	-158.671	-160.183			11.4	-152.171	-157.063	-158.289	-154.956	-154.413	-154.974	-158.342	-157.577	-155.632	-157.978	-156.889	-157.954	-158.167	-157.477	-160.567	-158.047	-157.205	-155.998			11.4	-155.291	-154.064	-153.354	-153.642	-154.765	-154.414	-152.319
11.5	-151.287	-152.06	-148.778	-152.262	-151.158	-153.897	-150.151	-149.998	-150.086	-148.744	-151.683	-155.487	-151.9	-157.476	-157.966	-155.367	-159.054	-160.154			11.5	-152.267	-156.908	-158.407	-155.586	-154.477	-155.874	-157.708	-157.41	-156.552	-158.012	-157.001	-157.789	-158.732	-157.962	-160.645	-157.931	-156.834	-155.659			11.5	-155.203	-153.884	-154.334	-153.211	-154.851	-154.461	-151.257
11.6	-150.922	-151.337	-149.557	-152.05	-151.256	-153.626	-149.342	-150.262	-151.545	-148.983	-151.909	-155.708	-152.299	-158.107	-158.307	-155.373	-159.207	-161.133			11.6	-152.703	-157.03	-158.584	-156.375	-154.705	-156.52	-157.617	-157.124	-157.036	-158.067	-157.519	-157.335	-159.113	-158.951	-160.741	-158.439	-156.562	-155.582			11.6	-155.198	-153.021	-155.536	-153.44	-154.83	-154.426	-151.668
11.7	-150.515	-151.92	-150.005	-151.522	-151.634	-152.705	-149.417	-150.967	-152.035	-149.099	-152.127	-156.04	-152.235	-158.694	-158.337	-155.873	-159.987	-161.932			11.7	-152.801	-157.239	-158.853	-156.681	-154.804	-156.53	-158.312	-156.796	-157.256	-157.95	-158.288	-156.941	-158.841	-159.802	-160.857	-159.195	-156.27	-155.641			11.7	-155.037	-152.454	-156.195	-153.975	-154.76	-154.132	-152.934
11.8	-150.759	-152.797	-149.519	-150.753	-151.854	-151.719	-149.995	-152.155	-150.892	-148.917	-152.166	-156.804	-151.686	-158.674	-158.355	-156.51	-160.88	-161.612			11.8	-152.18	-157.44	-158.606	-156.666	-154.602	-156.46	-159.091	-156.258	-157.396	-157.822	-158.815	-156.799	-158.345	-160.487	-160.925	-159.631	-156.219	-155.589			11.8	-154.407	-152.518	-156.2	-154.013	-154.651	-154.353	-154.059
11.9	-151.444	-153.184	-149.084	-149.903	-151.614	-151.41	-150.207	-152.879	-149.192	-148.687	-152.028	-157.07	-151.481	-157.67	-158.838	-157.065	-160.713	-160.628			11.9	-151.413	-157.75	-157.88	-156.742	-154.223	-156.464	-159.477	-155.716	-157.153	-157.77	-158.684	-156.865	-157.988	-160.673	-161.076	-159.557	-156.489	-155.581			11.9	-153.693	-152.934	-156.009	-153.606	-154.525	-155.228	-154.695
12	-151.957	-153.259	-149.307	-149.277	-151.222	-151.849	-149.959	-152.28	-148	-148.874	-151.541	-156.192	-152.009	-156.367	-159.396	-157.423	-159.854	-160.064			12	-151.081	-158.143	-157.318	-156.788	-153.856	-155.982	-159.357	-155.709	-156.587	-157.59	-157.929	-156.897	-157.583	-160.038	-161.328	-159.447	-156.719	-156.082			12	-153.18	-153.516	-156.163	-153.188	-154.693	-155.804	-154.901
12.1	-152.297	-153.278	-149.841	-149.344	-150.694	-152.327	-149.909	-150.845	-147.792	-149.492	-150.725	-154.999	-152.598	-155.657	-159.322	-157.687	-159.302	-160.442			12.1	-150.984	-158.172	-157.364	-156.741	-153.524	-155.005	-159.077	-156.148	-156.225	-157.202	-156.939	-156.76	-157.016	-159.158	-161.718	-159.789	-156.605	-156.946			12.1	-152.922	-154.111	-156.494	-152.981	-155.017	-155.731	-154.644
12.2	-152.834	-153.372	-150.518	-149.966	-150.1	-152.436	-150.293	-149.994	-148.574	-150.298	-150.378	-154.312	-152.608	-155.884	-158.663	-157.694	-159.169	-161.006			12.2	-150.828	-157.505	-157.972	-156.865	-153.35	-154.401	-158.723	-156.361	-156.292	-156.77	-156.067	-156.797	-156.661	-158.964	-162.456	-160.338	-156.485	-157.175			12.2	-153.058	-154.412	-156.413	-153.36	-154.95	-155.381	-154.044
12.3	-153.41	-153.871	-151.226	-150.514	-149.982	-152.566	-150.639	-149.839	-149.649	-150.776	-151.008	-154.226	-152.461	-156.98	-158.173	-157.45	-158.891	-160.965			12.3	-150.679	-156.625	-158.619	-157.012	-153.628	-154.912	-158.017	-156.248	-156.536	-156.634	-155.584	-157.402	-157.004	-159.603	-163.249	-160.422	-156.749	-156.506			12.3	-153.407	-154.433	-155.72	-154.193	-154.481	-154.652	-153.582
12.4	-153.953	-154.61	-151.71	-150.91	-150.548	-152.897	-150.53	-149.567	-150.424	-150.493	-152.016	-154.858	-152.78	-158.287	-158.248	-157.519	-158.964	-160.605			12.4	-150.621	-156.195	-158.689	-156.767	-154.237	-156.125	-157.388	-156.309	-156.512	-156.903	-155.722	-158.233	-157.84	-160.466	-163.399	-159.97	-156.98	-155.969			12.4	-153.694	-154.528	-154.357	-154.458	-154.073	-153.517	-153.489
12.5	-154.473	-154.792	-151.974	-151.512	-151.281	-152.956	-150.005	-149.261	-150.71	-149.648	-152.792	-155.679	-153.122	-158.771	-158.357	-157.849	-160.316	-160.456			12.5	-150.68	-156.206	-158.153	-156.138	-154.811	-156.807	-157.412	-156.6	-156.256	-157.333	-156.413	-158.507	-158.376	-160.852	-162.721	-159.647	-156.807	-156.169			12.5	-153.979	-154.76	-152.572	-153.707	-153.994	-152.897	-153.581
12.6	-154.253	-154.269	-152.067	-152.335	-151.434	-152.839	-149.674	-149.167	-150.719	-148.745	-153.429	-155.739	-152.854	-158.561	-158.055	-157.917	-162.082	-160.554			12.6	-150.899	-156.185	-157.585	-155.476	-155.418	-156.693	-157.987	-156.698	-156.567	-157.583	-157.277	-158.059	-158.411	-160.594	-161.852	-159.805	-156.52	-156.85			12.6	-154.23	-154.525	-151.402	-153.006	-154.09	-153.507	-153.841
12.7	-153.154	-153.858	-151.889	-153.126	-151.023	-153.169	-149.855	-149.348	-151.154	-148.18	-153.926	-155.295	-152.301	-158.626	-157.635	-157.911	-162.506	-160.386			12.7	-151.192	-155.806	-157.596	-155.065	-156.062	-156.459	-158.679	-156.427	-157.335	-157.439	-157.966	-157.804	-158.432	-160.268	-161.456	-160.008	-156.432	-157.455			12.7	-154.185	-153.5	-151.756	-153.131	-154.197	-154.832	-154.328
12.8	-152.223	-153.793	-151.451	-153.49	-150.99	-153.963	-150.008	-149.763	-152.098	-148.003	-153.846	-155.206	-152.165	-158.804	-157.546	-158.204	-161.319	-159.687			12.8	-151.617	-155.344	-158.069	-154.909	-156.272	-156.413	-159.045	-156.105	-157.439	-157.329	-158.321	-158.334	-158.632	-160.342	-161.498	-159.897	-156.646	-157.374			12.8	-153.921	-152.489	-153.416	-153.217	-154.519	-155.811	-154.963
12.9	-152.079	-153.805	-151.035	-153.381	-151.542	-154.402	-149.91	-150.092	-152.392	-148.349	-152.872	-155.331	-152.259	-158.375	-157.858	-158.378	-159.867	-159.154			12.9	-152.452	-155.386	-158.202	-154.844	-155.744	-156.565	-158.925	-156.1	-156.926	-157.871	-158.275	-158.991	-158.575	-160.509	-161.63	-159.765	-157.028	-156.912			12.9	-153.841	-152.288	-155.089	-152.517	-155.019	-155.764	-155.515
13	-152.42	-153.755	-151.045	-153.31	-151.661	-153.548	-150.045	-150.2	-151.701	-149.381	-151.499	-155.143	-151.921	-157.967	-158.267	-158.18	-159.124	-159.457			13	-153.323	-155.944	-157.591	-154.781	-154.677	-156.763	-158.54	-156.437	-156.725	-158.673	-157.943	-159.226	-157.826	-160.363	-161.656	-160.05	-157.307	-156.875			13	-154.019	-152.549	-155.625	-151.633	-155.186	-154.826	-155.425
13.1	-152.882	-153.42	-151.257	-153.285	-150.988	-152.028	-150.453	-150.214	-151.314	-150.248	-150.895	-154.817	-151.165	-158.514	-158.6	-158.096	-158.735	-160.319			13.1	-153.32	-156.812	-156.736	-154.821	-153.691	-156.51	-158.259	-156.9	-156.972	-158.658	-157.458	-159.246	-156.793	-159.847	-161.398	-160.554	-157.592	-157.266			13.1	-153.915	-152.637	-155.298	-151.484	-154.926	-153.991	-154.675
13.2	-153.246	-153.252	-150.945	-152.944	-150.331	-151.743	-150.683	-150.128	-151.596	-150	-151.264	-154.683	-150.699	-159.234	-158.55	-157.832	-158.557	-161.389			13.2	-152.677	-157.735	-156.604	-154.954	-153.275	-155.839	-158.308	-157.264	-157.389	-157.67	-157.046	-159.358	-156.361	-159.062	-160.952	-160.628	-157.922	-157.389			13.2	-153.329	-152.861	-154.894	-152.262	-154.698	-153.922	-154.014
13.3	-153.357	-153.793	-150.388	-152.073	-150.072	-152.667	-150.67	-149.772	-151.345	-149.106	-151.549	-154.767	-150.958	-158.888	-157.537	-156.718	-159.301	-162.63			13.3	-152.381	-158.133	-157.666	-155.237	-153.339	-155.68	-158.558	-157.375	-157.534	-156.693	-156.867	-159.55	-156.845	-158.166	-160.868	-160.072	-157.715	-156.989			13.3	-152.886	-153.593	-154.489	-153.115	-154.842	-154.11	-153.672
13.4	-153.089	-154.321	-150.32	-150.813	-149.916	-152.773	-150.332	-149.435	-150.074	-148.6	-151.139	-155.198	-151.726	-157.824	-156.102	-155.583	-160.717	-163.504			13.4	-152.499	-157.736	-159.036	-155.932	-153.346	-156.538	-158.856	-157.146	-156.807	-156.44	-156.629	-159.169	-157.869	-157.612	-161.162	-159.501	-156.865	-156.648			13.4	-153.226	-154.152	-154.191	-153	-155.416	-154.196	-153.353
13.5	-152.42	-154.201	-150.545	-149.579	-150.274	-151.703	-149.692	-149.483	-148.588	-148.919	-150.763	-155.903	-152.554	-156.99	-155.832	-155.691	-161.501	-163.332			13.5	-152.589	-157	-159.393	-156.879	-153.021	-157.67	-159.083	-156.543	-155.845	-156.694	-156.132	-157.829	-158.713	-157.906	-161.268	-159.551	-156.145	-156.788			13.5	-154.105	-153.882	-154.557	-152.266	-156.174	-154.469	-153.017
13.6	-151.981	-153.87	-150.637	-148.768	-151.434	-151.079	-149.554	-149.753	-147.689	-149.748	-151.438	-156.101	-152.774	-156.247	-156.935	-156.544	-161.278	-162.359			13.6	-152.778	-156.681	-158.986	-157.502	-153.066	-158.137	-158.877	-155.968	-155.843	-156.979	-155.745	-156.536	-158.775	-158.912	-161.236	-160.123	-156.088	-157.092			13.6	-154.676	-153.31	-155.41	-152.099	-156.714	-154.87	-152.688
13.7	-152.326	-153.638	-150.574	-148.799	-152.269	-151.339	-150.251	-150.103	-147.396	-150.23	-152.66	-155.292	-152.018	-155.475	-157.969	-156.898	-160.849	-161.361			13.7	-153.39	-157.024	-158.9	-157.399	-154.253	-157.903	-158.074	-155.914	-156.641	-157.031	-156.019	-156.409	-158.431	-160.104	-161.441	-160.801	-156.783	-157.243			13.7	-154.661	-153.321	-155.935	-152.505	-156.702	-155.185	-152.587
13.8	-152.971	-153.325	-150.507	-149.831	-152.048	-151.298	-150.899	-150.543	-147.574	-150.007	-153.067	-154.067	-151.198	-155.598	-158.131	-156.803	-160.559	-160.506			13.8	-154.085	-157.764	-159.195	-156.613	-155.797	-157.435	-157.175	-156.418	-157.531	-156.653	-156.751	-157.12	-158.605	-161.111	-161.815	-161.116	-157.93	-157.432			13.8	-154.492	-153.863	-155.659	-152.776	-155.876	-155.511	-153.114
13.9	-153.083	-153.035	-150.64	-151.168	-151.557	-150.778	-150.949	-150.927	-148.863	-149.638	-152.722	-153.387	-151.658	-156.921	-157.867	-156.633	-160.251	-159.681			13.9	-154.18	-158.504	-159.414	-155.705	-156.254	-156.909	-156.679	-157.181	-158.059	-156.089	-157.194	-157.788	-159.224	-161.473	-162.164	-160.717	-158.472	-157.824			13.9	-154.544	-154.295	-154.509	-152.835	-154.836	-155.67	-154.183
14	-152.5	-153.283	-151.113	-152.208	-151.583	-150.786	-150.719	-151.279	-151.231	-149.391	-152.522	-153.684	-153.118	-158.306	-157.811	-156.167	-159.993	-159.062			14	-153.748	-158.77	-159.397	-155.052	-155.599	-156.367	-156.599	-157.636	-157.766	-155.984	-157.206	-158.132	-159.442	-160.885	-162.228	-160.204	-157.855	-158.305			14	-154.868	-154.243	-153.193	-152.771	-154.585	-155.376	-155.104
14.1	-151.817	-153.974	-151.555	-153.284	-151.552	-151.575	-150.5	-151.583	-153.061	-149.083	-152.298	-154.437	-154.017	-158.625	-157.953	-155.931	-159.852	-158.928			14.1	-153.316	-158.606	-159.106	-154.633	-155.038	-156.226	-156.886	-157.464	-156.828	-156.608	-157.218	-158	-159.106	-159.845	-161.936	-160.503	-156.898	-158.516			14.1	-155.124	-153.856	-152.913	-152.572	-155.022	-154.951	-155.232
14.2	-151.808	-154.113	-151.468	-154.181	-150.838	-152.176	-150.578	-151.274	-153.428	-149.096	-151.811	-154.656	-153.694	-158.017	-157.717	-156.658	-159.842	-159.466			14.2	-152.945	-158.516	-158.659	-154.618	-155.046	-156.661	-157.324	-157.177	-156.06	-157.587	-157.392	-157.411	-158.836	-159.381	-161.553	-161.197	-156.648	-158.178			14.2	-155.008	-153.646	-153.908	-152.492	-155.324	-154.797	-154.849
14.3	-152.461	-153.271	-151.162	-154.251	-150.342	-152.161	-150.997	-150.325	-152.931	-149.649	-151.716	-154.054	-152.703	-157.452	-157.28	-158.045	-159.933	-160.332			14.3	-152.725	-158.44	-158.505	-154.853	-155.141	-157.267	-157.644	-157.283	-155.943	-158.24	-157.582	-157.023	-158.893	-159.659	-161.084	-161.255	-157.322	-157.728			14.3	-154.741	-153.989	-155.225	-152.465	-155.135	-154.65	-154.688
14.4	-153.04	-152.564	-151.252	-153.779	-150.703	-152.264	-151.239	-149.718	-152.403	-150.406	-152.159	-153.531	-151.461	-157.559	-157.604	-159.14	-160.147	-160.806			14.4	-153.005	-157.958	-158.99	-154.764	-155.168	-157.486	-157.826	-157.578	-156.423	-158.425	-157.773	-157.308	-158.841	-159.931	-160.508	-160.703	-158.112	-157.712			14.4	-154.467	-154.625	-155.789	-152.334	-154.852	-154.141	-154.684
14.5	-153.102	-153.049	-151.792	-153.277	-151.117	-152.823	-151.07	-149.901	-152.074	-150.918	-152.512	-153.778	-150.509	-158.133	-158.394	-159.416	-160.357	-160.945			14.5	-153.596	-157.419	-159.82	-154.528	-155.227	-157.053	-157.827	-157.71	-157.225	-158.632	-157.769	-158.065	-158.34	-159.827	-160.184	-160.108	-158.024	-157.864			14.5	-154.095	-154.894	-155.363	-152.523	-155.072	-153.657	-154.408
14.6	-152.832	-154.12	-152.495	-152.587	-150.772	-153.302	-150.853	-150.243	-151.814	-150.638	-152.582	-154.461	-150.486	-158.743	-158.463	-159.225	-160.392	-161.376			14.6	-153.976	-157.181	-160.311	-154.888	-155.29	-156.378	-157.635	-157.843	-157.941	-159.077	-157.57	-158.838	-157.698	-159.591	-160.475	-159.623	-157.11	-157.797			14.6	-153.781	-154.599	-154.62	-153.083	-155.663	-153.865	-153.985
14.7	-152.577	-154.665	-152.857	-151.408	-149.924	-153.218	-150.92	-150.257	-152.081	-149.636	-152.516	-155.546	-150.98	-159.236	-157.77	-158.857	-160.493	-161.893			14.7	-154.174	-156.887	-160.139	-155.897	-155.393	-155.869	-157.379	-158.111	-158.269	-159.367	-157.561	-159.262	-157.198	-159.553	-161.165	-159.186	-156.243	-157.74			14.7	-153.799	-154.049	-154.39	-153.208	-155.894	-154.521	-153.775
14.8	-152.441	-154.276	-152.314	-150.307	-149.493	-153.008	-151.017	-150.168	-153.122	-148.83	-152.275	-156.94	-151.136	-159.341	-157.073	-158.235	-160.633	-161.656			14.8	-154.243	-156.464	-159.436	-156.657	-155.44	-155.375	-157.292	-158.015	-158.129	-159.165	-157.943	-159.184	-156.751	-159.766	-161.649	-158.96	-155.907	-157.91			14.8	-154.116	-153.46	-154.933	-152.608	-155.467	-154.975	-153.917
14.9	-152.386	-153.491	-151.293	-150.303	-149.816	-153.28	-150.699	-150.173	-153.955	-148.698	-152.193	-157.543	-151.11	-158.725	-156.922	-157.641	-160.317	-160.793			14.9	-153.749	-156.253	-158.537	-156.485	-155.087	-155.024	-157.42	-157.268	-157.754	-158.622	-158.358	-158.705	-156.511	-159.862	-161.839	-159.138	-155.945	-158.091			14.9	-154.359	-153.06	-155.754	-152.417	-154.825	-155.107	-154.033
15	-152.468	-153.267	-150.87	-151.245	-150.296	-153.678	-150.274	-150.435	-154.107	-148.9	-152.534	-156.817	-151.68	-157.726	-157.535	-157.792	-159.768	-160.413			15	-152.858	-156.057	-157.8	-155.943	-154.233	-155.25	-157.647	-156.217	-157.574	-158.243	-158.313	-158.202	-156.802	-159.866	-162.002	-159.433	-156.395	-158.149			15	-154.279	-153.17	-155.924	-153.244	-154.558	-155.04	-153.791
15.1	-152.716	-153.769	-150.99	-152.057	-150.419	-153.725	-150.307	-150.851	-153.962	-148.956	-152.781	-155.495	-152.884	-157.223	-158.581	-158.82	-159.917	-161.044			15.1	-152.51	-155.539	-157.336	-156.037	-153.28	-156.014	-158.187	-155.303	-157.541	-158.317	-157.789	-157.846	-157.508	-160.348	-162.163	-159.41	-157.321	-158.248			15.1	-154.072	-153.825	-155.088	-154.129	-154.94	-154.695	-153.665
15.2	-152.794	-154.458	-151.114	-152.415	-150.31	-153.406	-150.864	-151.116	-153.512	-148.689	-152.381	-154.744	-153.766	-157.381	-159.14	-159.709	-161.047	-161.96			15.2	-152.899	-155.155	-156.956	-156.566	-153.101	-156.931	-159.086	-154.959	-157.263	-158.573	-157.216	-157.487	-158.1	-161.042	-162.434	-159.12	-158.022	-158.303			15.2	-154.1	-154.702	-154.218	-154.36	-155.887	-154.065	-154.126
15.3	-152.524	-154.888	-151.575	-152.382	-150.187	-153.04	-151.484	-151.23	-152.664	-148.639	-151.333	-155.106	-153.771	-157.329	-158.691	-159.394	-161.996	-162.05			15.3	-153.288	-155.304	-156.65	-156.521	-154.23	-157.535	-159.655	-155.488	-156.705	-158.519	-156.944	-157.04	-158.307	-161.065	-163.023	-158.987	-157.929	-157.956			15.3	-154.276	-155.278	-154.206	-154.349	-157.075	-153.54	-154.887
15.4	-152.623	-154.846	-152.633	-151.952	-150.216	-153.045	-151.353	-150.974	-151.709	-149.417	-150.227	-155.869	-153.54	-156.769	-158.047	-158.455	-161.839	-161.21			15.4	-153.422	-155.441	-156.638	-155.941	-155.819	-157.357	-159.44	-156.31	-156.272	-158.126	-156.745	-156.913	-158.315	-160.439	-163.634	-159.222	-157.514	-157.371			15.4	-154.292	-154.97	-154.472	-154.423	-158.052	-153.498	-155.529
15.5	-153.36	-154.639	-153.54	-151.43	-150.386	-153.414	-150.311	-150.327	-151.025	-150.469	-149.781	-156.076	-153.511	-156.468	-158.349	-158.12	-161.196	-160.54			15.5	-153.643	-155.198	-156.862	-155.787	-156.63	-156.513	-158.654	-156.605	-156.243	-157.816	-156.372	-157.517	-158.397	-159.939	-163.646	-159.81	-157.411	-157.286			15.5	-154.25	-153.968	-154.122	-154.261	-158.081	-153.854	-155.678
15.6	-153.758	-154.992	-153.411	-151.029	-150.517	-153.743	-149.339	-150.194	-150.761	-150.62	-150.163	-155.512	-153.462	-156.827	-159.458	-157.916	-160.636	-160.919			15.6	-153.786	-155.027	-157.173	-156.312	-156.322	-155.785	-157.608	-156.557	-156.384	-157.895	-156.077	-158.351	-158.593	-159.97	-163.011	-160.54	-157.881	-157.735			15.6	-154.208	-153.273	-153.47	-153.74	-156.993	-154.143	-155.188
15.7	-153.524	-155.981	-152.317	-150.833	-150.676	-153.627	-148.988	-150.641	-150.765	-149.863	-150.857	-154.542	-153.506	-157.668	-160.047	-156.995	-160.116	-161.716			15.7	-153.333	-155.304	-157.469	-156.672	-155.415	-155.689	-156.801	-156.616	-156.424	-158.025	-155.933	-158.738	-158.895	-160.274	-162.28	-160.956	-158.614	-157.965			15.7	-154.173	-153.421	-153.592	-153.332	-155.888	-154.1	-154.537
15.8	-152.938	-156.599	-151.17	-150.965	-151.064	-153.114	-148.975	-150.427	-150.747	-149.665	-151.119	-153.826	-153.511	-158.428	-159.422	-156.176	-159.799	-161.789			15.8	-152.726	-155.848	-157.466	-156.431	-154.743	-156.124	-156.631	-156.635	-156.313	-157.93	-155.915	-158.911	-159.255	-160.143	-161.733	-160.73	-158.749	-157.945			15.8	-154.566	-154.116	-154.406	-153.457	-155.728	-153.927	-153.837
15.9	-151.834	-156.072	-150.885	-151.455	-151.474	-152.837	-149.373	-149.335	-150.718	-150.872	-150.878	-153.781	-152.755	-158.419	-158.309	-156.368	-159.964	-161.028			15.9	-152.708	-156.11	-157.449	-156.263	-154.544	-156.564	-156.959	-156.527	-156.301	-157.951	-156.323	-159.137	-159.344	-159.287	-161.437	-160.156	-157.985	-158.059			15.9	-155.305	-154.733	-154.713	-153.792	-156.256	-153.851	-152.949
16	-150.888	-154.779	-151.298	-152.093	-151.43	-153.085	-150.311	-148.734	-150.924	-152.265	-150.942	-154.538	-151.591	-157.556	-157.885	-156.762	-160.334	-160.094			16	-153.093	-155.806	-157.835	-156.697	-154.209	-156.585	-157.42	-156.631	-156.574	-158.087	-156.893	-159.359	-158.957	-158.419	-161.773	-159.827	-157.088	-158.053			16	-155.428	-154.714	-154.172	-153.938	-156.537	-153.979	-152.367
16.1	-151.194	-153.459	-151.48	-152.332	-150.762	-153.29	-151.375	-149.409	-151.411	-152.355	-151.853	-155.775	-151.139	-156.686	-158.494	-156.463	-160.435	-159.674			16.1	-153.391	-155.323	-158.043	-157.414	-153.545	-156.25	-157.731	-157.007	-156.737	-157.899	-156.816	-159.812	-158.071	-158.264	-162.466	-159.796	-156.922	-157.689			16.1	-154.531	-154.1	-153.612	-153.912	-156.086	-154.419	-152.531
16.2	-152.376	-152.431	-151.012	-151.914	-150.044	-153.042	-151.988	-150.459	-151.881	-151.329	-152.906	-156.3	-151.419	-156.661	-159.474	-156.013	-160.393	-160.096			16.2	-153.201	-155.174	-157.707	-157.924	-153.201	-155.749	-157.935	-157.256	-156.61	-157.443	-156.201	-160.53	-157.161	-158.774	-162.617	-159.69	-157.281	-157.207			16.2	-153.445	-153.551	-153.629	-153.642	-155.124	-155.299	-153.336
16.3	-153.156	-151.804	-150.162	-151.492	-150.044	-152.762	-151.672	-150.759	-151.786	-150.313	-152.839	-155.435	-151.639	-157.353	-160.231	-156.328	-160.623	-161.098			16.3	-152.688	-155.35	-157.513	-157.94	-153.446	-155.394	-158.314	-157.171	-156.706	-157.208	-156.013	-160.863	-157.016	-159.554	-162.257	-159.405	-157.326	-156.754			16.3	-153.168	-153.559	-154.011	-153.078	-153.893	-156.404	-154.255
16.4	-153.088	-151.802	-149.737	-151.625	-150.618	-152.896	-150.586	-150.307	-151.158	-149.734	-151.64	-154.167	-151.47	-158.12	-160.759	-157.088	-161.148	-161.763			16.4	-152.762	-155.643	-157.913	-157.445	-153.733	-155.569	-158.695	-156.898	-157.112	-157.333	-156.381	-160.151	-157.304	-160.125	-162.133	-159.212	-156.99	-156.576			16.4	-153.919	-153.993	-154.242	-152.425	-152.869	-156.889	-154.565
16.5	-152.734	-152.224	-150.18	-151.767	-150.995	-153.061	-149.822	-149.905	-150.688	-149.352	-150.429	-153.769	-151.326	-158.629	-160.99	-157.425	-161.495	-161.131			16.5	-153.48	-156.093	-158.533	-156.862	-153.664	-156.026	-158.495	-156.524	-157.204	-157.669	-156.666	-158.718	-157.116	-160.106	-162.393	-159.237	-156.449	-156.785			16.5	-154.93	-154.415	-154.045	-151.975	-152.758	-156.158	-154.053
16.6	-152.806	-152.284	-150.759	-151.636	-151.165	-152.73	-150.323	-149.681	-150.659	-149.345	-149.497	-154.246	-151.74	-158.872	-160.826	-157.458	-161.449	-159.702			16.6	-153.922	-156.322	-158.645	-156.6	-153.641	-156.119	-157.733	-155.992	-156.938	-158.104	-156.92	-157.768	-156.737	-159.771	-162.554	-159.385	-155.341	-157.008			16.6	-155.249	-154.435	-153.5	-151.962	-153.353	-154.752	-153.164
16.7	-153.216	-152.098	-150.928	-151.772	-151.509	-152.189	-151.707	-149.09	-150.742	-149.914	-148.875	-154.637	-152.579	-158.681	-160.628	-157.431	-161.475	-159.282			16.7	-153.733	-155.885	-157.898	-156.672	-153.994	-155.614	-157.294	-155.474	-157.038	-158.341	-157.375	-157.942	-156.88	-159.787	-162.268	-159.612	-154.32	-157.105			16.7	-154.845	-153.894	-153.06	-152.308	-153.855	-153.79	-152.528
16.8	-153.201	-152.616	-150.927	-152.248	-151.688	-152.231	-152.612	-148.374	-150.883	-150.499	-149.396	-154.422	-153.438	-158.095	-160.654	-157.4	-161.855	-160.512			16.8	-153.239	-155.066	-156.987	-156.828	-154.292	-154.96	-157.434	-155.375	-157.567	-158.218	-157.736	-158.479	-157.355	-159.91	-161.851	-159.861	-154.768	-157.341			16.8	-154.121	-153.298	-153.233	-152.747	-154.247	-153.512	-152.675
16.9	-152.775	-153.534	-150.878	-152.576	-151.23	-152.966	-152.373	-148.174	-151.243	-150.789	-150.96	-154.35	-154.061	-157.58	-160.69	-157.787	-162.204	-162.386			16.9	-152.876	-154.244	-156.858	-156.809	-154.108	-154.941	-157.428	-155.835	-157.771	-158.312	-157.848	-158.431	-157.786	-159.43	-161.75	-159.869	-156.416	-157.918			16.9	-153.201	-153.127	-153.734	-153.327	-154.815	-153.218	-153.374
17	-152.873	-153.872	-150.877	-152.575	-150.517	-153.464	-151.458	-148.497	-151.675	-151.1	-152.222	-154.932	-154.119	-157.398	-160.267	-158.35	-162.383	-163.843			17	-152.925	-153.624	-157.261	-156.57	-153.69	-155.544	-157.151	-156.46	-157.328	-158.842	-157.513	-158.077	-158.163	-158.844	-161.746	-159.591	-157.882	-158.598			17	-152.453	-152.767	-153.79	-154.036	-155.317	-152.588	-153.688
17.1	-153.628	-153.782	-150.971	-152.398	-150.293	-153.082	-150.538	-149.213	-152.007	-151.349	-152.297	-155.486	-153.443	-157.607	-159.22	-158.44	-162.403	-164.29			17.1	-153.141	-153.455	-157.435	-156.392	-153.631	-155.995	-157.128	-156.725	-156.542	-159.274	-156.501	-158.002	-158.403	-159.043	-161.531	-159.656	-158.614	-158.904			17.1	-152.373	-151.833	-153.537	-154.268	-155.285	-152.189	-153.417
17.2	-154.1	-154.019	-151.098	-152.294	-150.447	-152.436	-150.288	-150.231	-152.057	-150.89	-151.562	-155.616	-152.427	-158.123	-158.278	-158.384	-161.565	-163.44			17.2	-153.203	-153.853	-157.313	-156.481	-154.154	-156.215	-157.507	-156.801	-155.935	-159.225	-155.502	-158.011	-158.262	-159.633	-161.336	-160.264	-158.783	-158.617			17.2	-152.922	-151.271	-153.689	-153.753	-154.615	-152.569	-152.972
17.3	-154.235	-154.769	-151.228	-152.415	-150.187	-152.212	-150.928	-151.049	-151.68	-149.433	-150.993	-155.459	-151.947	-158.56	-158.169	-158.704	-159.994	-161.964			17.3	-153.416	-154.829	-157.082	-156.758	-154.882	-156.616	-157.893	-157.167	-156.111	-158.544	-155.329	-157.977	-157.822	-159.842	-161.569	-160.643	-158.608	-157.927			17.3	-153.653	-151.899	-153.968	-153.246	-153.886	-153.697	-152.338
17.4	-154.687	-155.259	-151.16	-152.605	-149.49	-152.119	-151.709	-150.907	-151.318	-147.913	-150.859	-155.104	-152.112	-158.534	-158.671	-159.33	-159.302	-161.193			17.4	-154.01	-156.088	-156.745	-156.939	-155.429	-157.012	-157.932	-157.47	-156.961	-157.573	-155.646	-158.23	-157.293	-159.651	-162.059	-160.432	-158.388	-157.28			17.4	-153.976	-153.229	-153.607	-153.426	-153.796	-155.117	-151.728
17.5	-154.874	-154.95	-150.72	-152.489	-149.317	-152.23	-151.893	-149.835	-151.663	-147.678	-150.839	-154.843	-151.922	-158.075	-159.392	-159.914	-160	-161.602			17.5	-154.518	-156.841	-156.42	-156.739	-155.682	-157.079	-157.766	-157.158	-157.484	-157.161	-155.769	-158.631	-156.883	-159.258	-162.308	-160.064	-158.216	-156.953			17.5	-153.65	-154.282	-152.856	-153.925	-154.255	-156.061	-151.959
17.6	-153.825	-153.96	-150.089	-152.126	-150.383	-153.053	-151.543	-148.976	-152.565	-148.495	-150.811	-155.113	-150.948	-157.63	-160.257	-159.947	-160.762	-162.413			17.6	-154.754	-156.701	-156.423	-156.378	-155.602	-157.341	-157.651	-156.598	-157.181	-157.416	-155.711	-158.746	-156.966	-158.906	-162.625	-159.877	-157.782	-156.948			17.6	-153.085	-154.765	-152.475	-154.043	-154.535	-155.963	-153.166
17.7	-152.053	-152.373	-149.543	-151.964	-152.002	-153.75	-151.288	-149.027	-152.953	-149.15	-150.589	-155.746	-150.24	-157.561	-160.81	-159.261	-160.72	-162.598			17.7	-155.037	-156.209	-156.738	-156.38	-155.113	-158.125	-157.618	-156.478	-156.777	-157.644	-155.95	-158.615	-157.573	-159.039	-163.406	-159.818	-157.119	-157.473			17.7	-152.72	-155.003	-152.66	-153.923	-154.623	-155.031	-154.231
17.8	-151.026	-150.885	-149.306	-151.815	-152.575	-153.223	-151.345	-149.524	-152.289	-149.556	-150.125	-156.127	-150.724	-157.571	-160.669	-158.283	-160.397	-162.041			17.8	-155.027	-155.558	-156.934	-156.539	-154.433	-158.468	-157.891	-156.84	-156.844	-157.62	-156.747	-158.472	-158.299	-159.51	-164.112	-159.741	-156.807	-158.523			17.8	-152.613	-155.211	-153.127	-154.158	-155.018	-154.097	-154.324
17.9	-151.417	-150.463	-149.585	-151.244	-151.467	-152.094	-151.315	-149.812	-151.137	-150.471	-150.016	-155.923	-151.929	-157.108	-160.187	-157.465	-160.483	-161.3			17.9	-154.314	-154.588	-156.942	-156.388	-154.256	-157.769	-158.464	-157.062	-157.089	-157.679	-157.651	-158.129	-158.722	-159.627	-164.342	-159.78	-156.759	-159.335			17.9	-152.501	-155.157	-153.577	-154.709	-155.196	-153.693	-153.786
18	-152.457	-151.059	-150.255	-150.559	-149.678	-152.004	-151.055	-149.359	-150.514	-151.56	-150.524	-155.288	-152.818	-156.139	-160.08	-157.068	-160.806	-160.635			18	-153.474	-153.954	-157.119	-156.234	-154.552	-156.907	-158.824	-157.004	-157.345	-157.737	-157.839	-157.396	-158.637	-159.257	-164.31	-160.096	-156.475	-159.163			18	-152.179	-154.621	-153.681	-154.808	-154.571	-153.459	-153.251
18.1	-153.395	-152.09	-150.777	-150.495	-148.66	-153.358	-150.659	-148.227	-150.836	-151.532	-151.172	-154.724	-152.785	-155.607	-160.543	-157.149	-160.681	-160.169			18.1	-153.005	-154.15	-157.29	-156.575	-154.332	-156.694	-158.819	-157.18	-157.652	-157.608	-157.114	-156.546	-158.606	-158.753	-163.774	-160.444	-156.199	-158.112			18.1	-151.894	-153.976	-153.179	-154.204	-153.804	-152.969	-152.818
18.2	-154.004	-152.91	-150.595	-151.265	-149.069	-154.765	-150.296	-147.483	-151.365	-150.413	-151.706	-154.545	-151.938	-156.358	-160.879	-157.175	-160.135	-159.913			18.2	-152.739	-154.453	-157.152	-157.305	-153.437	-156.834	-158.736	-157.251	-157.725	-157.611	-156.113	-155.984	-159.026	-158.302	-162.601	-160.497	-156.208	-157.107			18.2	-152.043	-153.846	-152.46	-153.493	-153.509	-152.46	-152.258
18.3	-154.069	-152.95	-149.802	-152.346	-150.414	-154.699	-150.218	-147.86	-151.536	-149.665	-152.095	-154.526	-151.095	-157.846	-160.346	-157.024	-160.153	-159.866			18.3	-152.69	-154.383	-157.106	-157.652	-152.797	-156.793	-158.693	-156.401	-157.553	-157.885	-155.579	-155.895	-159.235	-158.142	-161.881	-160.144	-156.344	-156.932			18.3	-152.61	-154.19	-152.281	-152.969	-153.672	-152.375	-151.985
18.4	-153.721	-152.371	-149.264	-152.922	-151.792	-153.398	-150.206	-148.83	-151.604	-149.868	-152.154	-154.47	-150.679	-158.963	-159.243	-157.252	-161.116	-160.318			18.4	-152.959	-154.505	-157.421	-157.092	-152.883	-156.495	-158.584	-155.158	-157.477	-158.275	-155.774	-156.333	-158.62	-158.455	-162.223	-159.469	-156.569	-157.373			18.4	-153.144	-154.533	-152.784	-152.484	-154.531	-152.927	-152.709
18.5	-153.258	-151.876	-149.262	-152.356	-152.542	-152.193	-149.957	-149.64	-151.677	-150.536	-151.925	-154.636	-150.421	-159.006	-158.669	-157.649	-162.255	-161.297			18.5	-153.125	-154.913	-157.601	-156.279	-153.222	-155.894	-158.426	-154.583	-157.467	-158.781	-156.233	-157.052	-157.721	-159.003	-162.683	-158.852	-156.909	-157.871			18.5	-153.479	-154.906	-153.179	-152.002	-155.953	-153.905	-154.015
18.6	-152.686	-151.809	-149.316	-151.073	-152.539	-151.857	-149.807	-150.448	-151.692	-151.38	-151.586	-155.08	-150.114	-157.87	-159.268	-157.64	-162.589	-161.945			18.6	-152.905	-155.034	-157.287	-155.943	-153.321	-154.991	-158.243	-154.659	-157.216	-159.089	-156.349	-157.522	-157.454	-159.169	-162.566	-158.693	-157.309	-158.224			18.6	-153.998	-155.668	-153.119	-151.576	-156.748	-154.579	-154.658
18.7	-152.334	-152.093	-149.547	-150.379	-152.14	-152.263	-150.17	-151.735	-152	-151.663	-150.958	-155.469	-149.67	-156.344	-160.272	-157.361	-161.738	-161.742			18.7	-152.626	-154.857	-156.995	-155.714	-153.422	-154.409	-157.908	-154.942	-156.594	-158.845	-156.151	-157.494	-157.827	-158.813	-162.193	-158.95	-157.725	-158.397			18.7	-154.759	-156.476	-153.124	-151.205	-156.364	-154.588	-154.166
18.8	-152.596	-152.63	-150.237	-150.731	-151.592	-152.91	-150.584	-152.887	-152.603	-150.695	-150.068	-155.646	-149.224	-155.298	-160.604	-156.939	-160.473	-161.328			18.8	-152.487	-154.802	-157.438	-154.852	-153.841	-154.891	-157.296	-155.448	-155.778	-158.407	-155.822	-157.206	-158.353	-158.667	-161.945	-159.328	-158.246	-158.464			18.8	-155.165	-156.435	-153.356	-150.923	-155.45	-154.36	-153.088
18.9	-153.003	-153.166	-150.955	-151.634	-150.982	-153.612	-150.322	-152.545	-152.754	-149.464	-149.523	-155.552	-149.039	-155.058	-160.412	-156.429	-160.009	-161.099			18.9	-152.497	-154.914	-158.223	-153.689	-154.246	-155.995	-156.567	-156.179	-155.26	-158.069	-155.541	-157.051	-159.042	-159.094	-161.625	-159.665	-158.884	-158.329			18.9	-155.023	-155.416	-153.611	-151.157	-154.594	-154.092	-152.178
19	-152.924	-153.337	-151.403	-152.589	-150.607	-154.284	-149.775	-150.744	-152.024	-149.353	-149.813	-155.309	-149.195	-155.665	-160.456	-156.404	-160.362	-161.067			19	-152.781	-154.823	-158.459	-153.44	-154.371	-156.455	-156.332	-156.775	-155.283	-157.984	-155.733	-156.972	-159.868	-159.57	-160.77	-159.908	-159.217	-157.879			19	-154.747	-154.289	-153.905	-152.214	-154.198	-153.698	-151.953
19.1	-152.498	-153.049	-151.572	-153.021	-150.562	-154.467	-150.208	-148.989	-151.183	-150.007	-150.799	-155.474	-149.495	-156.477	-160.768	-157.311	-160.698	-161.272			19.1	-153.391	-154.413	-158.118	-154.162	-154.606	-155.922	-156.957	-156.924	-155.338	-158.403	-156.366	-156.504	-160.175	-159.789	-159.787	-160.016	-159.036	-157.427			19.1	-154.365	-153.744	-154.196	-153.414	-154.452	-153.526	-152.392
19.2	-152.165	-152.61	-151.197	-152.853	-150.299	-153.999	-151.617	-148.29	-151.22	-150.347	-151.801	-155.898	-149.444	-156.595	-160.623	-158.737	-160.529	-161.478			19.2	-153.897	-153.939	-157.645	-154.945	-155.005	-155.207	-157.908	-156.657	-155.109	-158.854	-156.868	-155.692	-159.444	-160.072	-159.536	-159.881	-158.499	-157.24			19.2	-153.549	-153.749	-154.4	-153.988	-154.949	-153.931	-152.968
19.3	-151.988	-152.186	-150.403	-152.645	-149.717	-153.505	-152.391	-148.433	-151.979	-150.122	-152.176	-155.707	-149.146	-156.091	-159.743	-159.878	-159.764	-161.594			19.3	-153.76	-153.758	-157.28	-155.504	-155.02	-155.116	-158.553	-156.3	-155.002	-158.615	-156.786	-155.226	-158.186	-160.391	-159.866	-159.392	-157.742	-157.313			19.3	-152.6	-154.128	-154.667	-154.145	-155.197	-154.67	-153.177
19.4	-151.817	-151.678	-149.635	-152.52	-149.342	-153.494	-151.895	-148.707	-152.514	-149.622	-152.141	-154.91	-149.418	-155.743	-158.851	-160.269	-158.924	-161.658			19.4	-153.126	-153.943	-156.98	-155.687	-154.635	-155.584	-159.034	-156.021	-155.172	-157.807	-156.104	-155.551	-157.459	-160.314	-160.409	-158.74	-156.866	-157.296			19.4	-152.327	-154.8	-155.04	-154.172	-155.106	-155.212	-152.978
19.5	-151.505	-151.505	-149.097	-152.389	-149.492	-153.388	-151.108	-149.057	-152.076	-149.372	-152.241	-154.303	-150.49	-155.706	-158.574	-159.66	-158.924	-161.685			19.5	-152.713	-154.056	-156.727	-155.3	-154.37	-156.053	-159.695	-155.837	-155.429	-157.129	-155.487	-156.199	-157.682	-159.758	-161.166	-158.386	-155.79	-156.874			19.5	-153.147	-155.455	-155.493	-153.77	-155.077	-155.128	-152.768
19.6	-151.128	-152.045	-148.753	-152.382	-150.133	-152.767	-150.759	-150.054	-150.762	-149.813	-152.408	-154.356	-151.391	-155.696	-158.906	-158.506	-159.852	-161.87			19.6	-152.997	-153.838	-156.712	-154.986	-154.353	-156.171	-160.155	-156.09	-155.584	-157.025	-155.546	-156.224	-158.322	-159.069	-161.726	-158.561	-154.486	-156.427			19.6	-154.701	-155.562	-155.902	-152.971	-155.308	-154.412	-152.817
19.7	-151.004	-152.75	-148.733	-152.514	-150.937	-152.479	-150.959	-151.292	-149.544	-150.533	-152.21	-154.693	-151.431	-155.901	-159.451	-157.965	-160.708	-161.984			19.7	-153.531	-153.511	-157.061	-155.241	-154.284	-156.037	-159.691	-156.944	-155.5	-157.397	-155.945	-155.758	-158.712	-158.535	-161.713	-159.005	-153.676	-156.368			19.7	-156.016	-154.83	-155.717	-152.598	-155.281	-153.825	-152.928
19.8	-151.277	-153.107	-149.33	-152.569	-151.289	-153.014	-151.166	-151.458	-149.266	-150.772	-151.625	-154.52	-151.153	-156.455	-159.613	-158.446	-160.928	-161.566			19.8	-153.687	-153.414	-157.641	-155.557	-154.256	-156.041	-158.552	-157.912	-155.395	-157.865	-156.072	-155.696	-158.546	-158.133	-161.389	-159.321	-154.007	-156.607			19.8	-156.268	-153.604	-154.711	-153.066	-154.735	-153.861	-153.008
19.9	-151.848	-153.142	-150.125	-152.399	-151.283	-153.518	-150.785	-150.572	-149.711	-150.676	-151.005	-154.018	-151.146	-157.037	-159.339	-159.24	-161.052	-160.803			19.9	-153.724	-153.811	-158.059	-155.573	-154.645	-156.279	-157.949	-158.103	-155.49	-158.293	-156.107	-155.984	-158.075	-158.028	-161.249	-159.372	-155.016	-157.116			19.9	-155.536	-152.634	-153.621	-153.848	-154.271	-154.112	-153.248
20	-152.404	-152.881	-150.407	-152.138	-151.383	-153.056	-150.358	-150.054	-150.272	-150.485	-150.57	-154.113	-151.44	-157.432	-159.458	-159.409	-161.313	-160.301			20	-154.182	-154.703	-158.172	-155.518	-155.233	-156.425	-158.26	-157.214	-155.723	-158.62	-156.555	-156.107	-157.994	-158.366	-161.291	-159.283	-156.028	-157.883			20	-154.374	-152.562	-153.219	-154.026	-154.236	-154.138	-153.425
20.1	-152.422	-152.882	-150.111	-152.113	-151.116	-151.818	-150.64	-150.378	-150.748	-150.037	-150.157	-154.556	-151.967	-158.075	-160.357	-158.79	-161.305	-160.455			20.1	-154.836	-155.579	-158.194	-155.618	-155.579	-156.329	-158.618	-156.206	-155.915	-158.481	-157.021	-156.098	-158.294	-158.582	-161.049	-159.444	-156.919	-158.496			20.1	-153.266	-153.257	-153.449	-153.149	-154.283	-153.97	-153.376
20.2	-151.783	-153.57	-149.006	-152.651	-150.055	-150.76	-151.459	-151.071	-150.943	-149.935	-149.625	-154.393	-152.45	-159.124	-161.103	-158.253	-161.099	-161.078			20.2	-155.086	-156.111	-158.167	-155.843	-155.573	-155.828	-158.607	-156.104	-155.776	-157.797	-156.761	-156.097	-158.347	-158.507	-160.555	-160.038	-157.588	-158.414			20.2	-152.572	-153.954	-153.794	-152.101	-154.106	-153.721	-153.696
20.3	-151.086	-154.253	-147.336	-153.417	-149.092	-150.785	-152.195	-151.965	-150.583	-150.602	-149.436	-153.726	-152.432	-159.605	-160.856	-158.527	-161.193	-161.579			20.3	-154.879	-156.521	-158.121	-155.796	-155.297	-155.013	-158.508	-156.564	-155.391	-157.254	-155.978	-156.08	-158.2	-158.934	-160.374	-160.716	-157.794	-157.462			20.3	-152.42	-154.421	-153.958	-152.151	-154.032	-153.498	-154.468
20.4	-150.893	-154.397	-146.296	-153.364	-149.123	-151.911	-152.527	-152.498	-149.929	-151.499	-150.573	-153.606	-151.889	-159.107	-160.189	-159.253	-161.598	-161.682			20.4	-154.291	-156.588	-157.969	-155.485	-155.106	-154.696	-158.243	-156.63	-155.321	-157.357	-155.383	-156.083	-158.113	-160.055	-160.607	-161.205	-157.593	-156.28			20.4	-152.65	-154.908	-154.084	-152.963	-154.365	-153.435	-154.622
20.5	-151.357	-154.092	-146.392	-152.242	-149.726	-153.152	-152.354	-151.978	-149.685	-152.251	-152.754	-154.479	-151.319	-158.667	-159.791	-159.832	-161.821	-161.55			20.5	-153.287	-155.93	-157.687	-155.434	-155.347	-155.03	-157.85	-156.078	-155.706	-157.745	-155.241	-156.127	-157.967	-160.845	-160.871	-161.568	-157.375	-155.818			20.5	-153.077	-155.275	-154.276	-153.337	-154.709	-153.376	-153.832
20.6	-152.324	-153.296	-147.281	-151.33	-150.083	-153.493	-151.794	-150.812	-149.721	-152.66	-154.046	-155.654	-151.191	-158.667	-159.462	-160.241	-161.768	-161.456			20.6	-152.513	-155.144	-157.557	-155.815	-155.759	-155.224	-157.675	-155.555	-155.968	-157.828	-155.386	-156.292	-157.739	-160.482	-161.12	-161.93	-157.331	-156.109			20.6	-153.435	-155.236	-154.367	-152.978	-154.796	-153.131	-153.195
20.7	-153.015	-152.278	-148.175	-151.715	-150.072	-152.883	-151.228	-149.8	-149.264	-152.472	-153.539	-156.113	-151.619	-158.305	-159.109	-160.489	-161.751	-161.558			20.7	-152.551	-154.806	-157.585	-156.199	-155.908	-155.074	-157.66	-155.567	-155.659	-157.598	-155.672	-156.614	-157.506	-159.48	-161.453	-162.234	-157.43	-156.616			20.7	-153.314	-154.847	-154.422	-152.286	-154.974	-153.04	-153.231
20.8	-152.696	-151.733	-148.4	-152.58	-150.089	-152.08	-150.53	-149.412	-148.756	-151.645	-152.026	-155.528	-152.17	-157.354	-159.095	-160.383	-161.627	-161.876			20.8	-152.75	-154.924	-157.598	-156.167	-155.683	-154.955	-157.684	-155.957	-155.083	-157.408	-156.137	-156.764	-157.499	-158.838	-161.51	-162.084	-157.813	-157.234			20.8	-153.026	-154.249	-154.726	-151.891	-155.426	-153.27	-153.242
20.9	-151.6	-151.844	-148.348	-152.35	-150.428	-151.854	-149.249	-149.642	-149.103	-150.397	-150.521	-154.437	-152.003	-156.737	-159.568	-159.976	-160.939	-162.249			20.9	-152.355	-155.566	-157.614	-155.963	-155.2	-155.055	-157.852	-156.523	-154.92	-157.519	-156.847	-156.404	-157.98	-158.725	-161.158	-161.467	-158.28	-157.847			20.9	-153.423	-153.423	-155.057	-152.253	-155.814	-153.326	-152.859
21	-150.574	-152.228	-148.539	-150.962	-151.005	-152.382	-148.051	-150.104	-150.183	-149.3	-149.793	-153.625	-150.836	-156.972	-160.29	-159.583	-159.733	-162.357			21	-151.947	-156.442	-157.425	-155.831	-154.788	-155.213	-157.994	-156.997	-155.388	-157.921	-157.563	-155.719	-158.375	-158.933	-160.873	-161.043	-158.196	-158.021			21	-154.476	-152.678	-154.919	-152.985	-155.886	-153.002	-152.708
21.1	-150.232	-152.69	-148.754	-149.741	-151.357	-153.04	-148.131	-150.424	-151.439	-148.878	-150.297	-153.628	-149.796	-157.428	-160.85	-159.175	-158.862	-161.87			21.1	-152.331	-156.992	-156.931	-155.547	-154.699	-154.993	-157.927	-156.993	-155.979	-158.301	-157.849	-155.376	-158.096	-159.275	-160.922	-160.811	-157.492	-157.682			21.1	-155.114	-152.74	-154.295	-153.471	-155.979	-152.98	-153.23
21.2	-150.416	-153.187	-148.941	-149.474	-151.242	-153.194	-149.229	-150.424	-152.451	-149.061	-151.596	-154.457	-150.184	-157.613	-161.014	-158.41	-158.698	-161.04			21.2	-153.309	-157.102	-156.688	-154.968	-154.913	-154.601	-157.802	-156.682	-155.757	-158.57	-157.658	-155.618	-157.88	-159.246	-161.078	-160.242	-156.911	-157.221			21.2	-154.68	-153.664	-153.654	-153.54	-156.149	-153.507	-154.007
21.3	-150.235	-153.343	-149.393	-149.834	-150.966	-153.191	-150.129	-150.073	-153.08	-149.488	-152.525	-155.632	-151.584	-157.568	-160.813	-157.529	-158.603	-160.764			21.3	-154.089	-156.788	-157.098	-154.286	-155.292	-154.764	-157.762	-156.542	-154.492	-158.791	-157.397	-155.871	-158.432	-158.781	-161.423	-159.816	-156.942	-157.03			21.3	-153.927	-154.708	-153.561	-153.017	-155.691	-153.934	-154.541
21.4	-149.34	-153.261	-149.708	-150.679	-150.808	-153.596	-150.232	-149.406	-153.143	-149.941	-152.357	-156.453	-152.637	-157.432	-160.288	-157.184	-158.339	-161.063			21.4	-154.14	-156.099	-157.776	-154.054	-155.734	-155.459	-157.859	-156.602	-153.417	-158.838	-157.339	-155.814	-159.1	-158.503	-162.082	-160.148	-157.333	-157.118			21.4	-153.682	-155.24	-154.134	-151.949	-154.701	-154.083	-154.573
21.5	-148.785	-153.614	-149.343	-152.136	-150.855	-153.893	-149.82	-148.867	-152.312	-150.383	-151.25	-156.345	-152.875	-157.54	-159.496	-157.456	-158.386	-161.16			21.5	-153.567	-155.599	-158.37	-154.493	-156.103	-156.18	-158.078	-156.76	-153.726	-158.687	-157.445	-155.917	-158.996	-158.855	-162.458	-160.683	-157.694	-157.079			21.5	-153.728	-154.937	-154.836	-151.238	-154.296	-154.259	-154.276
21.6	-149.291	-154.276	-148.657	-153.427	-151.204	-153.41	-149.592	-149.3	-151.009	-150.647	-150.029	-155.417	-152.581	-157.882	-158.851	-157.975	-158.857	-161.232			21.6	-152.654	-155.686	-159.032	-155.039	-156.264	-156.456	-158.166	-156.975	-154.985	-158.342	-157.57	-156.484	-158.31	-159.68	-162.082	-160.975	-157.959	-156.852			21.6	-153.667	-154.198	-155.151	-151.717	-154.766	-154.346	-154.383
21.7	-150.084	-154.685	-148.233	-153.68	-151.884	-152.59	-149.817	-150.495	-150.537	-150.636	-149.665	-154.64	-151.981	-157.873	-158.953	-158.41	-159.424	-162.096			21.7	-151.745	-155.899	-159.41	-155.456	-156.3	-155.897	-158.01	-157.103	-155.988	-158.082	-157.367	-157.057	-158.061	-160.361	-161.333	-161.251	-158.153	-156.848			21.7	-153.773	-153.961	-155.062	-153.099	-155.251	-154.172	-154.979
21.8	-150.387	-154.868	-148.29	-153.062	-152.433	-152.302	-149.973	-151.136	-151.4	-150.534	-150.457	-154.765	-151.167	-157.393	-159.606	-158.825	-159.925	-163.159			21.8	-151.388	-155.801	-158.907	-155.967	-156.406	-154.99	-157.809	-157.101	-156.33	-158.393	-156.842	-157.212	-158.578	-160.535	-160.66	-161.494	-157.944	-157.121			21.8	-154.209	-154.383	-154.616	-154.471	-155.001	-154.026	-155.332
21.9	-150.246	-154.775	-148.776	-152.233	-152.268	-152.583	-149.688	-150.865	-152.434	-150.295	-151.844	-155.323	-150.481	-156.73	-159.753	-159.473	-160.285	-162.917			21.9	-151.795	-155.528	-157.992	-156.455	-156.67	-154.707	-157.662	-157.032	-156.266	-158.963	-156.612	-156.946	-159.138	-160.425	-160.176	-161.377	-157.23	-157.292			21.9	-154.547	-154.766	-153.847	-155.072	-154.224	-154.372	-155.245
22	-150.039	-154.263	-149.364	-151.614	-151.803	-152.565	-149.602	-150.632	-152.461	-149.886	-152.78	-155.621	-150.517	-156.107	-158.982	-159.777	-160.379	-161.725			22	-152.653	-155.391	-157.58	-156.652	-156.936	-154.857	-157.428	-156.83	-156.018	-159.189	-156.903	-156.472	-159.144	-160.206	-160.076	-160.973	-156.566	-157.111			22	-154.448	-154.722	-153.148	-154.92	-153.637	-155.125	-154.817
22.1	-149.898	-153.506	-149.81	-151.501	-151.616	-151.727	-150.087	-150.705	-151.738	-149.687	-152.589	-155.692	-151.52	-156.085	-158.329	-159.022	-160.181	-161.153			22.1	-153.426	-155.536	-157.338	-156.612	-156.782	-154.681	-157.268	-156.341	-156.031	-159.197	-157.387	-155.944	-158.69	-159.902	-160.644	-160.58	-156.375	-156.573			22.1	-153.861	-154.512	-153.112	-154.601	-153.632	-155.507	-153.892
22.2	-149.686	-152.686	-149.943	-151.907	-151.185	-150.779	-150.4	-150.238	-151.165	-149.961	-151.934	-155.57	-152.784	-156.747	-158.518	-157.867	-160.025	-161.309			22.2	-153.742	-155.809	-156.545	-156.633	-155.929	-154.561	-157.55	-155.838	-156.411	-159.312	-157.683	-155.403	-158.261	-159.755	-161.518	-160.34	-156.484	-156.133			22.2	-153.042	-154.166	-153.727	-154.212	-153.907	-155.204	-152.882
22.3	-149.557	-152.22	-149.64	-152.423	-150.077	-150.452	-150.1	-149.156	-151.028	-150.541	-151.886	-155.133	-153.079	-157.324	-159.072	-157.537	-160.107	-161.313			22.3	-153.639	-156.244	-155.731	-156.589	-154.976	-155.254	-158.052	-155.712	-156.326	-159.404	-157.584	-155.143	-158.271	-159.823	-161.86	-160.284	-156.685	-156.37			22.3	-152.448	-153.361	-154.402	-153.529	-153.827	-154.693	-152.59
22.4	-149.868	-152.482	-149.166	-152.727	-149.162	-150.647	-149.757	-148.52	-150.93	-150.866	-152.319	-154.49	-152.129	-157.611	-159.748	-158.368	-160.001	-161.153			22.4	-153.375	-156.792	-155.567	-156.144	-154.761	-156.121	-158.382	-155.748	-155.438	-159.326	-157.204	-155.473	-158.583	-159.772	-161.329	-160.339	-157.065	-156.976			22.4	-152.526	-152.704	-154.66	-152.786	-153.533	-154.368	-152.963
22.5	-150.409	-153.003	-149.097	-152.819	-149.502	-151.118	-149.948	-148.789	-150.522	-150.705	-152.292	-153.757	-151.01	-157.997	-160.491	-159.384	-159.555	-161.347			22.5	-152.963	-156.748	-155.816	-155.559	-155.101	-156.067	-158.675	-155.625	-154.763	-159.129	-156.749	-155.98	-158.83	-159.503	-160.302	-160.334	-157.569	-157.33			22.5	-153.349	-153.143	-154.351	-152.353	-153.769	-154.353	-153.38
22.6	-150.786	-153.127	-149.51	-152.809	-150.784	-151.903	-150.386	-149.498	-150.141	-150.612	-151.441	-153.064	-150.718	-158.377	-160.856	-159.534	-159.251	-161.876			22.6	-152.316	-156.058	-156.02	-155.377	-155.482	-155.547	-159.193	-155.484	-154.968	-158.68	-156.39	-156.14	-158.951	-159.197	-159.498	-160.311	-157.839	-157.478			22.6	-154.085	-154.219	-153.674	-152.356	-154.441	-154.411	-153.651
22.7	-151.126	-153.021	-149.901	-152.268	-151.981	-152.974	-150.496	-150.118	-150.265	-150.756	-150.457	-152.839	-151.342	-158.617	-160.631	-159.168	-159.106	-162.348			22.7	-151.856	-155.79	-156.174	-155.927	-155.585	-155.618	-159.82	-155.514	-155.641	-158.221	-156.209	-155.99	-158.944	-159.016	-159.42	-160.493	-157.618	-157.572			22.7	-154.061	-154.892	-153.227	-152.943	-154.949	-154.119	-153.913
22.8	-151.262	-153.118	-150.134	-151.172	-152.549	-153.818	-150.478	-150.283	-150.779	-150.745	-150.111	-153.309	-152.353	-158.866	-159.969	-159.022	-159.091	-162.37			22.8	-152.163	-156.539	-156.632	-157.002	-155.224	-155.813	-159.973	-155.62	-156.158	-158.196	-155.998	-155.903	-158.705	-158.989	-159.982	-160.722	-157.175	-157.57			22.8	-153.906	-155.03	-153.577	-153.758	-155.278	-153.617	-154.032
22.9	-150.78	-153.338	-150.302	-150.613	-152.175	-154.087	-150.634	-150.113	-151.324	-150.426	-150.201	-154.11	-152.69	-158.951	-159.13	-159.28	-159.48	-161.665			22.9	-152.983	-157.819	-157.328	-157.741	-154.711	-155.417	-159.473	-155.66	-156.102	-158.243	-155.686	-156.122	-158.245	-159.035	-160.636	-160.642	-157.039	-157.492			22.9	-154.044	-155.042	-154.466	-154.258	-155.24	-153.465	-153.886
23	-150.137	-153.454	-150.145	-151.116	-150.911	-154.257	-150.769	-150.008	-151.554	-149.939	-150.311	-154.878	-152.021	-158.548	-158.353	-159.802	-160.058	-160.411			23	-153.547	-158.901	-157.598	-157.694	-154.404	-155.008	-158.939	-155.713	-155.856	-158.034	-155.818	-156.349	-157.909	-159.002	-160.881	-160.313	-157.293	-157.063			23	-153.893	-154.991	-154.953	-154.554	-154.518	-154.022	-153.834
23.1	-149.979	-153.375	-149.455	-152.017	-149.782	-154.402	-150.833	-149.973	-151.546	-149.549	-150.742	-155.444	-151.25	-157.737	-157.659	-160.097	-160.37	-159.382			23.1	-153.672	-159.339	-157.316	-157.382	-154.408	-155.089	-158.595	-155.982	-156.101	-157.983	-156.873	-156.138	-158.068	-158.816	-160.577	-160.109	-157.368	-156.182			23.1	-153.456	-154.561	-154.762	-154.732	-153.795	-154.941	-154.143
23.2	-150.092	-153.272	-148.796	-152.525	-149.866	-153.781	-150.816	-150.142	-151.783	-149.447	-151.429	-155.707	-150.867	-157.266	-157.435	-159.805	-160.363	-159.423			23.2	-153.662	-158.919	-157.166	-157.089	-154.648	-155.32	-158.015	-156.448	-156.515	-158.22	-158.185	-155.697	-158.506	-158.837	-160.085	-160.033	-156.927	-155.372			23.2	-153.556	-153.925	-154.332	-154.587	-153.754	-155.357	-154.348
23.3	-150.163	-153.666	-148.896	-152.548	-150.687	-152.444	-150.934	-150.898	-151.923	-149.72	-151.435	-155.577	-150.883	-157.695	-158.224	-159.375	-160.396	-160.55			23.3	-153.643	-157.918	-157.475	-156.333	-154.985	-155.448	-157.208	-156.839	-156.313	-158.195	-158.645	-155.56	-158.634	-159.383	-159.988	-159.94	-156.44	-154.982			23.3	-154.095	-153.7	-153.745	-154.115	-154.084	-155.013	-154.004
23.4	-150.681	-154.73	-149.581	-152.606	-150.887	-151.379	-151.6	-152.05	-151.185	-150.37	-150.737	-154.84	-151.326	-158.354	-159.291	-159.174	-160.421	-161.686			23.4	-153.517	-156.934	-157.877	-155.251	-155.575	-155.518	-156.819	-156.989	-155.444	-157.665	-158.136	-155.894	-158.271	-160.052	-160.367	-160.003	-156.397	-154.93			23.4	-154.184	-153.951	-152.971	-153.607	-154.262	-154.374	-153.365
23.5	-152.093	-155.534	-150.109	-152.887	-150.051	-150.918	-152.092	-152.784	-150.174	-151.176	-150.557	-153.578	-151.683	-158.378	-159.622	-159.004	-160.076	-161.836			23.5	-153.321	-156.576	-158.054	-154.832	-156.23	-155.618	-157.111	-156.901	-154.59	-157.337	-157.236	-156.336	-157.934	-160.401	-160.803	-160.415	-156.896	-155.383			23.5	-153.981	-154.226	-152.735	-153.358	-154.167	-153.91	-152.777
23.6	-153.265	-155.181	-149.819	-152.867	-149.275	-150.748	-151.764	-152.592	-149.978	-151.553	-151.334	-152.704	-151.878	-158.037	-159.578	-159.239	-159.382	-161.499			23.6	-153.369	-157.17	-158.14	-155.491	-156.119	-155.984	-157.58	-156.855	-154.291	-157.761	-156.358	-156.472	-158.109	-160.479	-160.991	-160.93	-157.743	-156.419			23.6	-154.349	-154.269	-153.83	-153.207	-154.046	-153.802	-152.502
23.7	-152.899	-154.197	-148.754	-152.55	-149.844	-151.013	-151.555	-151.998	-150.181	-151.198	-151.904	-153.053	-152.456	-157.979	-159.682	-160.014	-158.633	-161.647			23.7	-153.738	-158.187	-158.191	-156.672	-155.012	-156.437	-157.711	-157.14	-154.501	-158.475	-155.95	-156.503	-158.596	-160.468	-160.831	-161.079	-158.4	-157.246			23.7	-155.126	-154.105	-155.617	-152.891	-154.268	-153.893	-152.77
23.8	-151.851	-153.508	-147.974	-152.374	-151.558	-151.845	-151.879	-151.628	-150.091	-150.546	-151.485	-154.45	-153.064	-158.011	-159.572	-160.455	-158.449	-161.921			23.8	-153.996	-158.791	-157.827	-157.461	-153.784	-156.49	-157.753	-157.426	-154.931	-158.835	-156.294	-156.662	-158.767	-160.251	-160.414	-160.8	-158.432	-157.251			23.8	-155.417	-153.756	-156.699	-152.554	-154.755	-153.684	-153.02
23.9	-151.412	-153.113	-148.209	-152.297	-152.773	-152.504	-151.866	-151.239	-150.106	-150.009	-151.125	-155.977	-152.999	-157.525	-159.327	-160.141	-159.227	-161.817			23.9	-153.914	-158.884	-157.057	-157.317	-153.205	-156.161	-158.195	-157.092	-155.268	-158.788	-156.992	-156.547	-158.462	-159.724	-160.073	-160.497	-158.1	-156.951			23.9	-155.236	-153.352	-156.587	-152.39	-155.197	-152.89	-152.675
24	-151.589	-152.694	-148.882	-152.334	-152.638	-152.448	-151.155	-150.771	-150.516	-149.803	-151.779	-156.441	-152.394	-156.802	-159.514	-159.586	-160.382	-161.706			24	-153.689	-158.718	-156.52	-156.504	-153.184	-155.779	-158.602	-156.226	-155.366	-158.505	-157.471	-156.024	-158.179	-159.238	-160.098	-160.471	-157.971	-157.008			24	-155.179	-153.291	-155.717	-152.381	-155.456	-152.387	-152.479
24.1	-152.024	-152.407	-149.379	-152.332	-151.865	-152.089	-150.602	-150.474	-151.163	-150.07	-152.652	-155.419	-151.925	-156.787	-159.918	-159.136	-161.062	-161.488			24.1	-153.66	-158.233	-156.388	-155.698	-153.446	-155.332	-158.211	-155.546	-155.39	-158.043	-157.459	-155.607	-158.361	-159.331	-160.369	-160.379	-158.253	-157.334			24.1	-155.21	-153.61	-154.929	-152.614	-155.167	-153.095	-153.134
24.2	-152.273	-152.62	-149.814	-151.911	-151.027	-151.963	-151.065	-150.276	-151.832	-150.157	-152.48	-154.082	-152.063	-157.383	-159.791	-158.707	-161.006	-160.803			24.2	-154.109	-157.61	-156.375	-155.332	-153.967	-154.703	-157.057	-155.341	-155.456	-157.438	-157.117	-155.429	-158.919	-159.89	-160.473	-159.982	-158.579	-157.316			24.2	-155.073	-153.533	-154.719	-153.287	-154.49	-154.061	-154.093
24.3	-151.789	-153.148	-149.742	-151.402	-150.489	-152.296	-151.782	-150.167	-152.219	-149.602	-151.56	-153.431	-152.187	-157.578	-158.977	-158.36	-160.535	-160.1			24.3	-154.944	-157.38	-156.632	-155.389	-154.502	-154.263	-155.887	-155.423	-155.492	-156.856	-156.896	-155.322	-159.265	-160.223	-160.461	-159.868	-158.558	-156.796			24.3	-154.838	-152.762	-154.693	-154.23	-154.24	-154.069	-154.615
24.4	-150.995	-153.226	-148.819	-150.991	-150.731	-152.771	-151.534	-150.28	-151.986	-149.174	-151.263	-153.109	-151.761	-157.157	-158.302	-158.499	-160.243	-159.777			24.4	-155.637	-157.879	-157.184	-155.452	-154.723	-154.414	-155.362	-155.894	-155.583	-156.359	-156.948	-155.281	-158.911	-160.073	-160.675	-160.349	-158.297	-156.368			24.4	-154.404	-152.385	-154.244	-154.878	-154.362	-153.556	-154.693
24.5	-150.832	-152.941	-148.486	-150.456	-151.334	-152.983	-150.688	-150.804	-151.175	-149.8	-151.849	-152.718	-151.622	-156.78	-158.648	-159.218	-160.33	-159.682			24.5	-155.537	-158.865	-157.644	-155.393	-154.794	-154.981	-155.422	-156.672	-155.864	-156.007	-157.1	-155.241	-158.167	-159.602	-160.923	-160.827	-158.359	-156.548			24.5	-153.604	-153.225	-153.767	-155.05	-154.424	-153.383	-154.678
24.6	-151.12	-152.954	-149.613	-150.429	-151.514	-153.11	-150.084	-151.528	-150.274	-151.216	-152.334	-152.777	-152.186	-156.656	-159.774	-159.96	-160.517	-159.868			24.6	-154.502	-159.47	-158.1	-155.55	-155.015	-155.527	-155.875	-157.21	-156.2	-156.064	-157.263	-155.291	-157.56	-159.094	-160.831	-160.754	-158.952	-157.283			24.6	-152.794	-154.626	-154.249	-154.867	-154.787	-153.611	-154.752
24.7	-151.21	-153.335	-150.598	-151.189	-151.334	-153.083	-149.83	-151.786	-149.717	-151.817	-152.146	-153.631	-152.774	-156.608	-160.614	-160.155	-160.451	-160.227			24.7	-153.307	-159.187	-158.79	-155.799	-155.339	-155.845	-156.744	-157.313	-156.282	-156.512	-157.401	-155.723	-157.196	-159.012	-160.516	-160.516	-159.19	-157.982			24.7	-152.438	-155.475	-155.358	-154.489	-155.684	-153.858	-154.975
24.8	-151.408	-153.774	-149.98	-151.889	-151.158	-152.139	-150.131	-151.553	-149.698	-150.595	-151.594	-154.513	-153.049	-156.932	-160.585	-159.779	-160.041	-160.315			24.8	-152.889	-158.4	-159.387	-155.689	-155.714	-155.96	-157.529	-157.199	-156.075	-157.002	-157.448	-156.4	-157.295	-159.62	-160.439	-160.673	-158.345	-158.076			24.8	-152.665	-155.309	-155.751	-154.099	-156.559	-153.827	-155.189
24.9	-152.105	-154.054	-148.702	-152.035	-150.799	-150.392	-151.032	-151.643	-149.937	-148.685	-151.238	-154.911	-153.017	-157.598	-159.947	-159.106	-159.951	-160.462			24.9	-153.211	-157.583	-159.545	-155.536	-156.146	-155.941	-157.656	-157.027	-155.865	-157.378	-157.432	-156.693	-157.943	-160.37	-160.675	-160.972	-157.333	-157.526			24.9	-153.303	-154.512	-154.958	-153.803	-156.747	-153.623	-155.419
25	-152.671	-154.247	-148.253	-151.566	-150.18	-149.397	-151.871	-152.207	-150.14	-147.641	-151.368	-155.157	-152.58	-157.926	-159.217	-158.776	-160.618	-161.081			25	-153.608	-157.027	-159.433	-155.897	-156.141	-155.838	-157.35	-156.82	-155.883	-157.438	-157.528	-156.258	-158.491	-160.435	-160.736	-161.107	-157.173	-156.953			25	-153.976	-153.909	-153.863	-153.733	-156.149	-153.488	-155.729
25.1	-152.666	-154.39	-148.328	-150.521	-149.809	-149.82	-152.041	-152.478	-150.77	-147.61	-151.694	-155.4	-152.096	-158.084	-158.754	-159.307	-161.365	-161.623			25.1	-153.846	-156.941	-159.165	-156.531	-155.377	-155.805	-157.162	-156.557	-156.216	-156.893	-157.808	-155.513	-158.587	-159.788	-160.331	-161.109	-157.379	-156.875			25.1	-154.525	-153.993	-153.419	-153.689	-155.162	-153.565	-155.668
25.2	-152.6	-154.022	-148.053	-149.518	-149.829	-150.776	-151.464	-152.121	-151.526	-147.928	-151.871	-155.794	-152.099	-158.738	-158.611	-160.037	-161.513	-161.667			25.2	-154.276	-157.219	-158.732	-156.931	-154.689	-155.827	-157.278	-156.402	-156.602	-155.857	-158.269	-155.036	-158.866	-158.956	-159.867	-161.085	-157.232	-157.036			25.2	-154.878	-154.345	-153.591	-153.362	-154.352	-153.956	-154.907
25.3	-152.555	-152.965	-147.652	-149.256	-149.672	-151.639	-150.548	-151.667	-151.092	-148.275	-152.187	-156.368	-152.596	-159.457	-158.658	-160.107	-161.019	-161.855			25.3	-154.909	-157.42	-158.515	-157.013	-154.949	-155.652	-157.508	-156.461	-156.517	-154.966	-158.563	-154.865	-159.582	-158.492	-159.772	-161.082	-156.9	-157.294			25.3	-154.816	-154.316	-154.282	-152.974	-153.949	-154.358	-153.764
25.4	-151.718	-152.223	-148.039	-149.809	-149.068	-152.307	-149.956	-151.37	-149.885	-148.773	-152.508	-156.63	-153.206	-159.154	-158.914	-159.809	-160.039	-162.667			25.4	-155.115	-157.207	-158.698	-156.944	-155.759	-155.254	-157.627	-156.558	-155.889	-154.842	-158.22	-154.724	-160.065	-158.694	-159.898	-160.793	-156.758	-157.609			25.4	-154.229	-153.974	-155.419	-152.844	-153.7	-154.269	-152.926
25.5	-149.97	-152.816	-149.37	-150.689	-148.618	-152.869	-150.058	-151.109	-149.665	-149.504	-152.545	-156.261	-153.232	-157.95	-159.443	-159.685	-159.196	-163.316			25.5	-154.7	-156.881	-159.035	-156.72	-156.277	-154.851	-157.631	-156.527	-155.126	-155.331	-157.66	-154.618	-159.939	-159.371	-159.902	-160.041	-156.887	-157.518			25.5	-153.091	-153.715	-156.056	-153.008	-153.47	-153.991	-152.876
25.6	-148.634	-154.419	-150.5	-151.257	-148.985	-153.735	-150.677	-151.249	-150.413	-150.42	-153.009	-155.479	-152.376	-156.888	-159.959	-159.737	-159.147	-163.181			25.6	-154.13	-156.876	-159.318	-156.36	-156.426	-154.735	-157.803	-156.262	-154.437	-155.912	-157.524	-154.786	-159.423	-160.013	-159.774	-159.387	-156.939	-156.975			25.6	-151.988	-153.602	-155.258	-153.297	-153.335	-154.134	-153.351
25.7	-148.829	-155.396	-150.656	-151	-150.095	-154.483	-151.381	-151.495	-150.719	-151.207	-153.797	-154.717	-151.519	-156.447	-160.016	-159.903	-159.61	-162.651			25.7	-153.924	-157.034	-159.201	-156.177	-156.494	-155.081	-158.211	-155.615	-154.088	-156.336	-157.619	-155.13	-158.671	-160.153	-159.795	-159.452	-156.504	-156.589			25.7	-151.708	-153.632	-153.527	-153.582	-153.112	-154.466	-153.856
25.8	-150.106	-154.587	-150.592	-150.082	-151.024	-154.344	-151.715	-150.991	-150.137	-151.137	-153.666	-154.263	-151.73	-156.464	-159.659	-160.04	-159.862	-162.129			25.8	-154.225	-157.01	-158.726	-156.115	-156.439	-155.593	-158.435	-155.124	-154.482	-156.468	-157.626	-155.384	-157.86	-159.872	-160.09	-160.101	-156.019	-156.72			25.8	-152.079	-154.143	-152.453	-153.838	-152.674	-154.453	-154.433
25.9	-151.079	-152.912	-150.791	-149.868	-150.699	-153.913	-151.608	-150.121	-149.68	-150.336	-152.753	-154.248	-152.844	-156.716	-159.349	-159.79	-159.879	-161.591			25.9	-154.741	-156.796	-158.54	-155.914	-156.23	-155.855	-158.214	-155.814	-155.24	-156.257	-157.61	-155.618	-157.269	-159.758	-160.498	-160.619	-156.084	-157.058			25.9	-152.673	-155.299	-152.733	-154.008	-152.43	-154.108	-155.268
26	-151.14	-152.031	-150.518	-150.937	-149.462	-154.11	-151.413	-149.946	-150.652	-149.811	-152.07	-154.383	-153.805	-157.128	-159.318	-159.432	-160.347	-160.798			26	-155.143	-156.613	-158.51	-155.655	-155.987	-155.934	-157.66	-157.312	-155.499	-156.019	-157.646	-156.127	-156.96	-159.898	-160.843	-160.407	-156.525	-157.207			26	-153.374	-156.377	-153.655	-153.851	-152.686	-153.833	-155.739
26.1	-150.958	-152.398	-149.599	-152.024	-148.797	-154.383	-151.313	-150.473	-152.859	-149.661	-151.828	-154.235	-153.867	-157.609	-159.491	-159.339	-160.883	-160.015			26.1	-154.952	-156.762	-158.182	-155.534	-155.453	-155.866	-157.027	-158.069	-155.236	-156.039	-157.47	-156.907	-157.083	-159.863	-160.881	-159.765	-156.938	-157.158			26.1	-153.916	-156.486	-154.539	-153.286	-153.168	-153.892	-155.188
26.2	-151.295	-153.413	-149.068	-152.048	-148.859	-153.893	-151.028	-150.745	-154.454	-149.539	-151.957	-154.054	-152.987	-157.666	-159.78	-159.28	-160.014	-159.744			26.2	-153.879	-157.227	-157.895	-155.781	-154.465	-155.601	-156.715	-157.612	-155.074	-155.96	-156.817	-157.502	-157.718	-159.66	-160.591	-159.408	-157.274	-157.041			26.2	-154.132	-155.737	-155.128	-153.072	-153.551	-153.993	-154.22
26.3	-152.058	-154.519	-149.698	-151.29	-148.858	-153.109	-150.484	-150.511	-154.367	-149.663	-152.212	-154.287	-151.928	-157.105	-160.179	-159.446	-158.072	-159.655			26.3	-152.751	-157.548	-157.663	-156.54	-153.669	-155.533	-156.885	-156.845	-155.099	-155.429	-156.236	-157.52	-158.539	-159.793	-160.619	-159.494	-157.614	-156.872			26.3	-154.043	-154.902	-155.235	-153.681	-153.823	-153.777	-153.694
26.4	-152.65	-155.359	-150.883	-151.212	-148.97	-152.882	-150.066	-150.4	-153.236	-150.25	-152.226	-154.775	-151.582	-156.721	-160.498	-160.162	-157.045	-159.495			26.4	-152.537	-157.718	-157.102	-157.464	-153.607	-155.863	-157.188	-156.46	-154.877	-154.8	-156.329	-157.017	-159.177	-160.294	-161.377	-159.833	-157.951	-156.778			26.4	-153.655	-154.517	-155.038	-154.188	-154.052	-153.357	-153.62
26.5	-152.862	-155.297	-151.373	-152.326	-149.278	-153.174	-150.105	-150.388	-151.527	-151.058	-152.278	-154.967	-151.72	-156.847	-160.278	-160.843	-157.759	-159.667			26.5	-153.095	-158.018	-156.758	-157.982	-154.14	-156.215	-157.19	-156.244	-154.386	-154.536	-156.722	-156.474	-159.259	-160.664	-162.134	-160.295	-158.186	-156.997			26.5	-153.062	-154.69	-154.928	-153.946	-154.011	-152.991	-153.766
26.6	-152.965	-154.348	-150.829	-152.986	-148.958	-153.004	-150.376	-149.887	-149.824	-151.354	-152.658	-154.442	-151.84	-156.846	-159.741	-160.992	-159.413	-160.193			26.6	-153.816	-158.147	-157.354	-157.968	-154.902	-156.264	-156.947	-155.857	-154.177	-154.612	-156.925	-156.266	-158.734	-160.833	-162.013	-160.854	-158.14	-157.248			26.6	-152.457	-155.152	-154.902	-153.515	-153.76	-152.993	-154.043
26.7	-152.8	-153.677	-149.962	-152.404	-148.256	-151.802	-150.609	-148.832	-149.32	-150.886	-152.926	-153.44	-152.166	-156.496	-159.738	-160.828	-160.711	-160.991			26.7	-154.408	-157.748	-158.233	-157.794	-155.391	-155.915	-156.738	-155.44	-154.669	-154.761	-157.017	-156.162	-158.411	-160.937	-161.17	-161.214	-157.707	-156.919			26.7	-152.255	-155.668	-154.714	-153.234	-153.715	-153.518	-154.336
26.8	-152.126	-153.683	-149.335	-151.908	-148.367	-150.628	-150.978	-147.623	-150.025	-150.476	-152.846	-152.844	-152.965	-156.244	-160.034	-160.37	-161.279	-162.024			26.8	-154.57	-157.175	-158.328	-157.436	-155.459	-155.192	-156.597	-155.309	-155.425	-154.942	-157.212	-155.979	-158.867	-160.814	-160.486	-160.985	-157.14	-156.166			26.8	-152.658	-156.002	-154.221	-152.986	-153.684	-153.983	-154.477
26.9	-151.266	-153.648	-149.109	-151.921	-149.337	-150.64	-151.445	-147.088	-150.832	-150.598	-152.663	-153.078	-153.988	-156.592	-159.468	-159.399	-161.612	-162.541			26.9	-153.827	-156.889	-157.85	-156.477	-155.587	-154.349	-156.769	-155.682	-155.703	-155.207	-157.508	-155.668	-159.344	-160.536	-160.241	-160.263	-157.039	-155.74			26.9	-153.192	-155.666	-153.596	-152.858	-153.268	-153.675	-154.178
27	-150.659	-153.215	-149.597	-151.319	-150.161	-151.432	-151.461	-147.959	-150.99	-150.794	-152.528	-153.814	-154.565	-157.53	-157.956	-158.441	-161.564	-162.365			27	-152.426	-156.836	-157.701	-155.221	-155.773	-153.865	-157.208	-156.376	-155.463	-155.429	-157.791	-154.995	-159.042	-160.539	-159.846	-159.422	-157.555	-155.802			27	-153.551	-154.789	-153.498	-152.854	-152.792	-153.166	-153.491
27.1	-150.475	-152.67	-150.673	-150.155	-150.359	-152.144	-150.414	-149.663	-150.668	-150.489	-152.328	-154.74	-154.228	-158.571	-156.948	-158.654	-160.98	-162.316			27.1	-151.541	-156.83	-157.889	-154.392	-155.53	-154.058	-157.212	-156.725	-155.118	-155.3	-157.994	-154.335	-158.383	-160.894	-159.201	-158.731	-158.065	-156.046			27.1	-153.901	-154.123	-153.997	-152.696	-152.732	-153.555	-153.256
27.2	-150.75	-152.39	-151.206	-149.804	-150.377	-152.714	-149.006	-150.735	-150.571	-149.501	-152.206	-155.325	-153.376	-159.337	-157.706	-159.889	-160.645	-162.184			27.2	-151.759	-156.778	-157.9	-154.009	-155.143	-154.609	-156.644	-156.696	-154.957	-154.89	-158.04	-154.493	-158.025	-161.138	-158.959	-158.363	-158.116	-156.424			27.2	-154.176	-153.874	-154.521	-152.348	-152.884	-154.545	-153.624
27.3	-151.188	-152.637	-150.337	-150.851	-150.418	-153.212	-148.64	-150.853	-150.785	-148.517	-152.408	-154.752	-152.548	-159.448	-159.28	-160.478	-161.108	-161.143			27.3	-152.492	-156.401	-157.701	-153.571	-155.365	-154.823	-156.139	-157.091	-154.918	-154.815	-158.072	-155.503	-157.968	-161.198	-159.082	-158.403	-157.859	-156.752			27.3	-154.098	-153.658	-154.975	-152.167	-152.768	-154.783	-153.511
27.4	-151.314	-153.137	-148.802	-152.334	-150.079	-153.179	-149.409	-150.91	-150.882	-148.534	-152.568	-153.816	-151.685	-158.907	-159.732	-159.603	-161.688	-159.851			27.4	-153.231	-155.865	-157.832	-153.268	-156.127	-154.59	-156.184	-157.862	-154.959	-155.279	-158.224	-156.454	-157.97	-161.279	-159.013	-158.804	-157.657	-156.629			27.4	-153.725	-153.443	-155.31	-152.399	-152.584	-153.913	-152.829
27.5	-151.017	-153.409	-148.176	-152.812	-149.453	-152.365	-150.525	-151.083	-151.015	-149.307	-152.385	-154.334	-150.979	-158.252	-159.109	-158.01	-161.559	-159.59			27.5	-153.721	-155.93	-158.542	-153.834	-156.749	-154.36	-156.588	-158.101	-155.333	-156.125	-158.161	-156.602	-157.823	-161.051	-158.892	-159.21	-157.844	-156.264			27.5	-153.454	-153.484	-155.306	-152.644	-152.991	-153.008	-152.864
27.6	-150.33	-153.424	-148.853	-152.065	-149.173	-151.545	-151.6	-150.981	-151.628	-149.926	-152.28	-155.687	-151.078	-157.779	-158.807	-156.979	-160.93	-160.162			27.6	-153.694	-156.616	-159.093	-155.161	-157.06	-154.419	-156.727	-157.836	-155.915	-157.185	-157.538	-156.194	-157.479	-160.437	-159.244	-159.147	-158.105	-156.267			27.6	-153.664	-153.666	-155.077	-152.259	-153.872	-152.912	-153.984
27.7	-149.677	-153.353	-149.578	-151.125	-149.296	-151.784	-152.67	-150.731	-152.252	-150.115	-152.458	-155.771	-151.822	-157.498	-159.323	-157.62	-160.296	-160.449			27.7	-153.604	-157.383	-158.812	-156.444	-157.097	-154.876	-156.43	-157.806	-156.056	-157.926	-156.682	-155.944	-157.37	-159.999	-159.909	-158.816	-157.911	-156.736			27.7	-154.182	-153.899	-154.806	-151.733	-154.435	-153.408	-155.146
27.8	-149.766	-153.317	-149.606	-150.818	-149.351	-152.906	-153.374	-150.591	-152.095	-150.123	-152.374	-154.53	-152.375	-157.448	-160.02	-159.573	-159.86	-160.248			27.8	-153.995	-157.907	-158.327	-157.163	-156.691	-155.485	-156.104	-157.681	-155.663	-157.779	-156.389	-156.019	-157.676	-159.834	-160.45	-158.853	-157.53	-157.276			27.8	-154.326	-154.204	-154.642	-152.153	-154.547	-153.88	-155.553
27.9	-150.476	-153.67	-149.671	-151.138	-148.956	-153.837	-153.025	-150.704	-151.341	-150.259	-151.77	-153.384	-152.867	-157.766	-159.993	-161.122	-159.751	-160.174			27.9	-154.473	-157.883	-158.555	-157.158	-156.005	-155.703	-155.986	-156.997	-155.318	-156.839	-156.661	-155.991	-157.741	-159.643	-160.994	-159.459	-157.487	-157.439			27.9	-153.908	-154.277	-154.624	-153.288	-154.564	-154.128	-155.359
28	-151.533	-154.213	-150.103	-151.691	-148.35	-154.207	-151.865	-151.197	-150.899	-150.377	-151.656	-153.233	-153.722	-158.586	-159.44	-161.366	-159.81	-160.401			28	-154.527	-157.352	-159.082	-156.819	-155.449	-155.682	-155.921	-156.467	-155.219	-155.804	-156.774	-155.605	-157.507	-159.547	-161.392	-160.252	-157.592	-157.044			28	-153.523	-154.281	-154.429	-153.963	-154.364	-154.302	-155.056
28.1	-152.621	-153.987	-150.261	-152.073	-148.307	-154.312	-150.878	-151.721	-151.04	-150.28	-153.014	-153.921	-154.295	-159.47	-159.382	-160.742	-159.808	-160.732			28.1	-154.307	-156.934	-158.939	-156.637	-155.105	-155.896	-156.094	-156.583	-155.068	-155.246	-156.719	-155.056	-157.568	-159.611	-161.13	-160.74	-157.267	-156.495			28.1	-153.358	-154.783	-154.044	-153.872	-153.884	-154.284	-154.902
28.2	-152.717	-153.089	-149.842	-151.813	-149.236	-154.153	-150.382	-151.652	-151.081	-150.469	-154.597	-154.66	-154.046	-159.645	-160.078	-159.883	-159.901	-161.064			28.2	-154.019	-157.078	-158.279	-156.507	-154.91	-156.034	-156.972	-156.949	-154.754	-155.188	-156.954	-154.823	-157.774	-159.564	-160.635	-160.962	-156.58	-156.232			28.2	-152.883	-155.362	-153.735	-153.9	-153.672	-153.925	-154.815
28.3	-152.002	-152.622	-149.215	-150.884	-150.592	-153.61	-150.283	-150.81	-150.913	-150.897	-154.42	-155.189	-153.473	-159.004	-160.819	-159.276	-160.223	-161.108			28.3	-153.598	-157.426	-157.921	-156.23	-155.029	-155.717	-158.006	-157.214	-154.541	-155.504	-157.306	-155.252	-157.758	-159.325	-160.687	-161.129	-156.355	-156.339			28.3	-152.403	-155.286	-153.546	-154.486	-153.893	-153.631	-154.648
28.4	-151.89	-152.687	-148.869	-150.165	-151.183	-152.91	-150.291	-149.824	-151.024	-150.769	-152.91	-155.657	-152.949	-158.186	-160.992	-158.944	-160.56	-160.964			28.4	-153.02	-157.391	-158.114	-156.011	-155.371	-155.182	-158.129	-157.125	-154.581	-156.015	-157.403	-155.782	-157.668	-159.079	-161.082	-161.111	-156.948	-156.754			28.4	-152.695	-154.85	-153.546	-154.824	-154.266	-153.803	-154.508
28.5	-152.139	-153.099	-149.023	-150.166	-150.636	-152.326	-149.981	-149.384	-150.883	-150.324	-151.485	-155.561	-152.539	-157.685	-160.621	-158.604	-160.635	-161.39			28.5	-152.666	-157.048	-158.666	-155.988	-155.547	-154.586	-157.305	-156.922	-154.735	-156.41	-157.335	-155.701	-157.72	-159.001	-161.156	-160.834	-157.726	-157.137			28.5	-153.38	-154.743	-153.688	-154.21	-154.833	-154.335	-154.638
28.6	-151.55	-153.973	-149.503	-150.705	-149.563	-151.884	-149.792	-149.478	-150.052	-150.197	-150.627	-154.524	-152.623	-157.564	-159.657	-158.468	-160.431	-162.371			28.6	-153.03	-156.836	-159.336	-156.076	-155.66	-154.111	-156.37	-157.144	-154.947	-156.583	-157.32	-155.552	-157.8	-158.966	-160.843	-160.411	-158.131	-157.142			28.6	-153.653	-154.995	-153.919	-153.177	-155.294	-154.96	-154.949
28.7	-150.422	-154.641	-149.807	-151.633	-148.347	-151.559	-150.086	-149.784	-149.346	-149.891	-150.807	-153.184	-152.969	-157.673	-158.52	-158.718	-160.209	-162.769			28.7	-153.913	-156.778	-159.737	-156.256	-155.859	-154.217	-155.995	-157.663	-155.282	-156.628	-157.411	-156.195	-157.688	-158.766	-160.547	-159.928	-158.14	-156.894			28.7	-153.521	-155.141	-154.502	-152.637	-154.996	-155.466	-154.955
28.8	-149.824	-154.599	-149.549	-152.326	-147.137	-151.582	-150.039	-149.942	-149.406	-149.074	-152.358	-152.579	-152.832	-157.704	-158.489	-159.026	-160.224	-161.745			28.8	-154.429	-156.707	-159.612	-156.242	-155.785	-154.958	-156.316	-157.884	-155.716	-156.703	-157.474	-157.36	-157.574	-158.646	-160.631	-159.401	-157.857	-156.763			28.8	-153.338	-154.935	-155.262	-152.669	-154.397	-155.605	-154.45
28.9	-150.052	-154.083	-149.029	-152.361	-146.741	-152.113	-149.171	-149.824	-149.953	-148.558	-154.228	-153.064	-152.072	-157.461	-159.394	-159.271	-160.132	-160.013			28.9	-154.206	-156.867	-159.192	-155.7	-155.335	-155.555	-157.069	-157.429	-156.088	-157.153	-157.344	-158.282	-157.795	-158.808	-160.925	-158.857	-157.584	-156.89			28.9	-153.097	-154.489	-155.465	-152.828	-154.339	-155.288	-153.895
29	-150.885	-153.273	-148.84	-152.35	-147.976	-152.801	-148.086	-149.758	-150.579	-148.863	-154.855	-154.11	-151.324	-157.313	-159.631	-159.395	-159.626	-159.108			29	-153.789	-157.35	-158.765	-155.051	-154.889	-155.228	-157.778	-156.472	-156.422	-158.12	-157.128	-158.729	-158.055	-158.891	-160.921	-158.694	-157.623	-157.129			29	-152.642	-153.969	-154.961	-152.959	-154.646	-154.784	-153.749
29.1	-151.768	-152.29	-149.155	-152.474	-149.958	-152.988	-147.311	-149.78	-151.154	-149.282	-154.285	-155.014	-151.185	-157.698	-158.985	-159.212	-159.291	-159.419			29.1	-153.571	-157.759	-158.374	-154.902	-154.749	-154.303	-157.922	-155.762	-156.82	-159.041	-157.056	-158.722	-157.927	-158.706	-160.451	-159.21	-158.011	-157.365			29.1	-152.154	-153.426	-154.578	-152.966	-154.713	-154.23	-153.906
29.2	-152.102	-151.674	-149.788	-152.042	-151.036	-152.645	-146.999	-149.73	-151.76	-149.215	-153.834	-155.491	-151.533	-158.192	-158.588	-159.057	-159.571	-160.079			29.2	-153.523	-157.84	-157.906	-155.192	-154.819	-153.723	-157.236	-155.546	-156.947	-159.328	-157.046	-158.182	-157.585	-158.572	-160.038	-159.827	-158.475	-157.582			29.2	-152.093	-153.02	-154.822	-152.649	-154.318	-153.553	-154.125
29.3	-151.835	-151.982	-150.369	-151.238	-151.072	-152.557	-147.374	-150.033	-152.278	-149.228	-153.656	-155.647	-152.097	-158.253	-159.128	-159.295	-160.292	-160.384			29.3	-153.646	-157.422	-157.329	-155.498	-154.697	-153.799	-156.328	-155.381	-156.497	-159.153	-156.875	-157.356	-157.506	-158.604	-160.15	-159.96	-158.36	-157.593			29.3	-152.397	-153.207	-154.929	-152.203	-153.751	-153.235	-154.341
29.4	-151.261	-152.81	-150.482	-151.021	-150.91	-153.216	-148.346	-150.672	-152.35	-149.814	-152.839	-155.378	-152.938	-158.165	-159.895	-159.601	-161.187	-160.254			29.4	-153.845	-156.503	-156.995	-155.531	-154.235	-154.242	-156.214	-155.321	-155.81	-158.787	-156.579	-156.782	-157.868	-158.664	-160.443	-159.698	-157.684	-157.327			29.4	-152.462	-153.934	-154.426	-151.744	-153.785	-153.879	-154.471
29.5	-150.996	-153.589	-150.133	-151.295	-150.486	-154.157	-149.466	-150.682	-152.084	-150.408	-151.627	-154.342	-153.584	-158.345	-159.628	-159.437	-161.837	-160.041			29.5	-153.945	-155.941	-157.13	-155.313	-153.933	-154.841	-156.803	-155.541	-155.426	-158.03	-156.498	-156.725	-158.342	-158.723	-160.477	-159.361	-157.22	-157.064			29.5	-152.384	-154.473	-154.014	-151.145	-154.906	-154.583	-154.432
29.6	-151.659	-154.349	-149.833	-151.251	-149.369	-154.639	-150.703	-149.927	-151.741	-150.373	-151.235	-152.926	-153.083	-158.923	-158.515	-158.782	-161.779	-160.32			29.6	-154.095	-156.471	-157.438	-155.113	-154.192	-155.49	-157.341	-155.747	-155.345	-156.848	-156.804	-156.996	-158.577	-158.776	-160.226	-159.382	-157.056	-157.038			29.6	-152.704	-154.609	-154.174	-151.014	-156.305	-153.765	-154.367
29.7	-152.574	-154.746	-150.039	-151.38	-147.898	-154.533	-152.069	-149.636	-151.052	-149.981	-151.773	-152.47	-151.818	-159.53	-157.886	-157.992	-161.118	-161.14			29.7	-154.438	-157.369	-157.446	-154.99	-154.626	-156.135	-157.746	-155.982	-155.344	-155.895	-157.333	-157.409	-158.449	-158.882	-159.789	-159.865	-157.003	-157.243			29.7	-153.144	-154.741	-154.607	-151.925	-156.874	-151.938	-154.386
29.8	-152.365	-154.158	-150.412	-152.388	-146.937	-154.142	-152.88	-150.339	-150.045	-149.702	-152.327	-153.581	-151.089	-159.626	-158.141	-157.184	-160.412	-161.708			29.8	-154.662	-157.598	-157.169	-154.953	-154.644	-156.649	-158.133	-156.483	-155.593	-155.82	-157.781	-157.874	-157.985	-159.161	-159.618	-160.223	-157.163	-157.397			29.8	-153.146	-154.772	-154.897	-153.138	-156.585	-151.268	-154.313
29.9	-151.109	-153.199	-150.059	-153.413	-147.016	-153.548	-152.512	-150.863	-149.659	-149.364	-152.329	-155.159	-150.969	-159.227	-158.808	-156.667	-160.361	-161.541			29.9	-154.766	-157.149	-157.176	-154.945	-154.373	-156.73	-158.498	-156.956	-156.066	-156.454	-157.75	-158.216	-157.576	-159.472	-159.94	-159.94	-157.232	-157.177			29.9	-152.742	-154.337	-154.802	-153.689	-155.859	-152.331	-154.137
30	-150.214	-152.82	-149.206	-153.548	-147.847	-153.031	-151.331	-150.239	-150.428	-148.93	-152.222	-155.981	-150.756	-158.61	-159.435	-156.935	-161.185	-161.246			30	-155.025	-156.68	-157.564	-154.701	-154.372	-156.269	-159.041	-156.994	-156.182	-157.171	-157.345	-158.342	-157.689	-159.583	-160.225	-159.297	-156.988	-156.929			30	-152.38	-153.593	-154.327	-153.357	-155.191	-153.894	-154.033
30.1	-150.366	-152.804	-148.73	-152.952	-148.508	-153.19	-150.494	-149.119	-151.307	-148.966	-152.801	-155.922	-150.479	-158	-159.666	-157.466	-162.068	-161.128			30.1	-155.25	-156.456	-157.889	-154.359	-154.792	-155.584	-159.815	-156.656	-155.722	-157.593	-157.249	-158.078	-158.264	-159.545	-160.2	-158.863	-156.891	-157.127			30.1	-152.451	-153.055	-153.719	-152.616	-155.067	-155.07	-153.993
30.2	-151.088	-152.845	-148.389	-152.205	-148.589	-153.909	-150.607	-148.518	-151.239	-149.538	-153.611	-155.183	-150.663	-157.778	-159.542	-157.503	-162.099	-160.865			30.2	-155.356	-156.236	-158.214	-154.572	-155.358	-155.093	-160.236	-156.085	-155.249	-157.49	-157.535	-157.473	-158.611	-159.628	-160.333	-158.773	-157.237	-157.338			30.2	-152.986	-153.13	-153.446	-152.228	-155.427	-155.719	-153.929
30.3	-151.804	-153.098	-148.006	-151.788	-148.476	-154.541	-150.888	-148.6	-150.946	-149.981	-153.545	-154.048	-151.31	-158.069	-159.48	-157.471	-161.407	-160.524			30.3	-155.292	-156.082	-158.794	-155.314	-155.693	-154.889	-159.775	-155.307	-155.379	-156.732	-157.403	-156.897	-158.362	-159.961	-160.763	-158.788	-157.783	-157.019			30.3	-153.697	-153.703	-153.944	-152.399	-155.785	-155.88	-153.944
30.4	-152.105	-153.129	-148.145	-151.8	-148.646	-154.916	-150.303	-149.002	-151.214	-149.857	-152.907	-153.44	-151.806	-158.679	-159.637	-158.041	-160.753	-160.113			30.4	-154.657	-156.213	-159.235	-155.752	-155.508	-155.029	-158.882	-154.73	-156.026	-155.769	-156.452	-156.3	-158.031	-160.146	-161.099	-158.929	-158.318	-156.548			30.4	-154.149	-154.326	-154.977	-152.832	-155.964	-155.667	-154.209
30.5	-151.892	-152.505	-148.678	-151.928	-149.283	-154.946	-149.285	-149.172	-151.701	-149.531	-152.736	-154.047	-151.857	-159.268	-159.856	-158.957	-160.626	-159.482			30.5	-153.791	-156.596	-158.948	-155.862	-154.833	-155.564	-158.454	-154.784	-156.617	-155.482	-155.363	-155.714	-158.05	-159.768	-161.238	-159.401	-158.682	-156.594			30.5	-154.075	-154.78	-155.727	-153.299	-156.029	-155.229	-154.481
30.6	-151.457	-151.676	-148.87	-151.712	-149.851	-154.384	-148.907	-148.8	-152	-149.397	-152.974	-155.137	-151.697	-159.367	-160.012	-159.566	-160.934	-158.72			30.6	-153.523	-157.096	-158.262	-156.338	-154.135	-156.253	-158.665	-155.38	-156.831	-156.109	-154.949	-155.795	-158.43	-159.265	-161.254	-160	-158.496	-156.993			30.6	-153.794	-155.3	-155.737	-153.738	-155.692	-154.705	-154.33
30.7	-150.924	-151.286	-148.77	-151.188	-149.719	-153.688	-149.099	-148.478	-152.132	-149.528	-153.018	-155.37	-151.524	-158.953	-159.899	-159.38	-160.933	-158.049			30.7	-153.77	-157.457	-157.956	-157.048	-153.962	-156.672	-158.965	-156.405	-156.708	-156.917	-155.096	-156.408	-159.18	-159.453	-161.097	-160.278	-157.685	-157.107			30.7	-153.922	-155.802	-155.156	-154.126	-154.971	-154.105	-153.769
30.8	-150.376	-151.786	-148.89	-150.886	-149.453	-153.817	-149.572	-148.958	-152.457	-150.289	-152.855	-154.639	-151.599	-158.324	-159.367	-158.55	-160.019	-157.791			30.8	-153.923	-157.377	-158.035	-157.382	-154.424	-156.432	-158.825	-157.528	-156.257	-157.211	-155.286	-156.595	-159.97	-160.042	-160.766	-160.241	-156.827	-156.975			30.8	-154.568	-155.852	-154.235	-154.329	-154.594	-153.517	-153.263
30.9	-150.414	-152.786	-149.024	-150.993	-149.702	-154.895	-150.392	-150.121	-152.988	-151.552	-152.697	-153.916	-152.186	-157.641	-158.869	-158.136	-158.777	-157.959			30.9	-153.772	-156.98	-158.297	-157.414	-155.013	-155.759	-158.385	-157.998	-155.488	-156.867	-155.538	-156.146	-159.98	-159.983	-160.57	-160.378	-156.448	-156.932			30.9	-155.121	-155.634	-153.466	-154.168	-154.635	-153.274	-153.244
31	-151.461	-153.072	-149.066	-151.514	-149.7	-155.894	-150.785	-151.257	-153.477	-151.818	-152.329	-153.704	-152.817	-157.334	-158.972	-158.648	-158.489	-158.414			31	-153.78	-156.87	-158.724	-157.384	-155.343	-155.587	-158.235	-157.615	-154.794	-156.122	-156.131	-155.371	-158.976	-159.233	-160.727	-160.861	-156.643	-156.819			31	-154.873	-155.431	-153.42	-153.723	-154.541	-153.273	-153.653
31.1	-152.64	-152.653	-149.472	-152.076	-149.048	-155.696	-150.373	-151.844	-153.948	-150.088	-151.561	-154.036	-152.832	-157.694	-159.386	-159.203	-159.341	-158.967			31.1	-154.311	-157.21	-158.866	-157.088	-155.359	-156.278	-158.511	-156.89	-154.787	-155.474	-156.891	-154.563	-157.95	-158.31	-160.901	-161.31	-157.172	-156.452			31.1	-153.863	-155.137	-153.886	-153.428	-154.352	-153.094	-153.895
31.2	-152.808	-152.736	-150.022	-151.925	-148.684	-154.436	-149.994	-151.67	-153.858	-147.646	-150.908	-154.863	-152.338	-158.136	-159.346	-159.143	-160.239	-159.004			31.2	-154.76	-157.521	-158.578	-156.604	-155.15	-156.98	-158.775	-156.198	-155.467	-155.361	-157.335	-154.365	-157.827	-157.353	-160.879	-161.512	-157.41	-156.217			31.2	-152.996	-154.753	-154.251	-153.333	-154.236	-152.976	-153.694
31.3	-152.394	-153.498	-150.295	-151.14	-148.833	-153.043	-149.882	-151.238	-152.595	-146.808	-151.2	-155.584	-151.948	-157.931	-158.71	-158.929	-160.506	-158.474			31.3	-154.351	-157.692	-158.238	-156.407	-155.258	-157.004	-158.793	-155.75	-156.119	-155.719	-157.368	-155.004	-158.558	-156.915	-160.827	-161.359	-156.911	-156.66			31.3	-152.907	-154.273	-154.316	-153.025	-153.937	-153.325	-153.639
31.4	-152.079	-154.286	-150.688	-150.588	-148.803	-152.245	-149.507	-151.462	-150.904	-148.165	-152.39	-155.623	-152.156	-157.205	-158.101	-159.182	-160.514	-158.227			31.4	-153.476	-157.931	-157.945	-156.51	-155.978	-156.808	-158.84	-155.708	-156.078	-156.314	-157.1	-155.679	-159.52	-157.534	-160.836	-160.715	-155.992	-157.559			31.4	-153.103	-153.698	-154.244	-152.646	-153.571	-153.997	-154.164
31.5	-151.463	-154.732	-151.401	-150.484	-148.745	-152.276	-148.969	-151.746	-149.935	-150.144	-153.479	-155.02	-152.652	-156.578	-158.239	-159.814	-160.557	-158.513			31.5	-153.024	-157.9	-157.944	-156.623	-156.811	-156.824	-158.988	-155.982	-155.643	-156.721	-156.652	-155.848	-160.08	-158.741	-160.941	-159.772	-155.349	-158.046			31.5	-152.921	-153.057	-154.29	-152.676	-153.573	-154.708	-154.636
31.6	-150.614	-154.527	-151.899	-150.563	-148.998	-152.915	-148.841	-150.753	-149.836	-151.158	-153.82	-154.147	-152.9	-156.542	-159.083	-160.29	-160.292	-158.943			31.6	-153.075	-157.362	-158.583	-156.787	-157.16	-156.61	-158.94	-156.345	-155.8	-156.253	-156.216	-155.744	-159.972	-159.616	-161.08	-158.995	-155.377	-157.708			31.6	-152.586	-152.603	-154.523	-153.031	-153.81	-155.24	-154.432
31.7	-150.663	-153.623	-151.547	-150.886	-148.93	-153.653	-149.038	-149.173	-150.163	-150.983	-153.471	-153.669	-152.953	-157.09	-159.57	-160.302	-159.758	-159.517			31.7	-153.282	-156.878	-159.289	-157.054	-156.863	-156.109	-158.561	-156.607	-156.618	-155.127	-155.871	-155.6	-159.205	-159.703	-161.113	-158.735	-155.944	-157.098			31.7	-152.795	-152.965	-154.666	-153.125	-153.951	-155.453	-154.005
31.8	-151.804	-152.622	-150.367	-151.429	-148.459	-153.903	-149.334	-148.483	-150.777	-150.494	-152.671	-154.121	-153.056	-157.923	-158.883	-160.123	-159.653	-160.223			31.8	-153.573	-156.805	-159.052	-157.069	-156.284	-155.978	-158.055	-156.637	-157.148	-154.583	-155.832	-155.447	-158.203	-159.249	-161.086	-158.973	-156.734	-156.907			31.8	-153.585	-154.261	-154.244	-152.574	-154.238	-155.343	-154.156
31.9	-152.553	-152.293	-149.505	-151.787	-148.722	-153.375	-150.255	-148.61	-151.556	-150.488	-151.715	-154.982	-153.366	-158.855	-157.649	-160.019	-160.247	-160.803			31.9	-153.932	-156.985	-158.033	-156.63	-155.898	-156.365	-157.709	-156.649	-157.121	-155.063	-156.403	-155.308	-157.747	-158.696	-161.301	-159.301	-157.476	-157.28			31.9	-154.192	-155.472	-153.276	-151.678	-154.927	-155.07	-155.022
32	-152.088	-152.492	-149.648	-151.875	-149.834	-152.575	-151.644	-149.172	-152.295	-150.742	-151.064	-155.083	-153.933	-159.283	-157.067	-159.58	-161.058	-161.049			32	-154.356	-157.413	-157.148	-156.14	-155.773	-156.9	-157.611	-157.088	-157.121	-155.798	-157.244	-155.295	-158.066	-158.232	-161.934	-159.406	-157.656	-157.826			32	-154.184	-155.727	-152.652	-150.935	-155.732	-154.839	-155.685
32.1	-151.262	-152.562	-150.147	-151.847	-150.407	-152.425	-152.14	-150.191	-153.197	-150.736	-150.957	-154.461	-154.187	-158.672	-157.68	-158.487	-161.675	-161.057			32.1	-154.676	-157.994	-156.676	-155.867	-155.581	-157.364	-158.021	-157.714	-157.415	-156.402	-157.693	-155.536	-158.713	-158.09	-162.468	-159.324	-157.242	-157.92			32.1	-154.068	-155.445	-152.952	-150.544	-156.214	-154.815	-155.135
32.2	-151.005	-152.82	-150.406	-151.71	-149.783	-153.218	-151.752	-150.954	-153.985	-150.532	-151.371	-154.283	-153.634	-157.869	-159.066	-157.395	-162.382	-161.104			32.2	-154.588	-158.096	-156.523	-155.913	-154.993	-157.468	-158.908	-157.646	-157.709	-157.165	-157.63	-156.134	-159.252	-158.417	-162.199	-159.141	-156.916	-157.451			32.2	-154.368	-155.188	-153.872	-150.766	-156.175	-155.066	-153.774
32.3	-151.468	-153.591	-150.666	-151.031	-148.868	-154.21	-151.837	-150.984	-153.499	-150.142	-151.881	-154.583	-152.731	-157.885	-160.221	-157.077	-163.075	-161.247			32.3	-154.151	-157.352	-156.686	-156.522	-153.98	-157.081	-159.398	-156.697	-157.699	-157.934	-157.548	-157.061	-159.384	-158.761	-161.281	-158.93	-156.939	-156.748			32.3	-154.59	-154.631	-154.787	-151.755	-155.628	-155.081	-152.901
32.4	-152.126	-153.84	-151.113	-149.725	-148.426	-154.561	-152.363	-150.902	-151.84	-149.433	-151.941	-154.622	-152.043	-158.258	-160.447	-157.215	-162.546	-161.456			32.4	-153.524	-156.396	-157.01	-157.283	-153.015	-156.802	-159.147	-155.673	-157.394	-158.306	-157.688	-157.976	-158.918	-158.502	-160.527	-158.878	-157.05	-156.13			32.4	-154.301	-153.819	-155.261	-152.954	-154.995	-154.349	-153.178
32.5	-152.41	-153.01	-151.23	-149.018	-148.193	-154.485	-152.178	-151.171	-150.786	-148.746	-152.038	-154.552	-151.549	-157.836	-159.864	-157.138	-160.782	-161.589			32.5	-152.95	-155.997	-157.171	-157.36	-152.514	-157.028	-158.668	-155.404	-156.966	-158.385	-157.547	-158.618	-158.289	-157.617	-160.314	-159.08	-157.137	-156.089			32.5	-153.954	-153.603	-155.379	-153.579	-154.65	-153.425	-154.333
32.6	-152.175	-152.033	-150.581	-149.677	-148.268	-154.385	-151.177	-151.75	-151.211	-148.428	-152.641	-154.647	-151.365	-156.899	-159.137	-156.862	-159.686	-161.311			32.6	-152.805	-156.17	-157.178	-156.925	-152.391	-157.114	-158.123	-156.115	-156.432	-158.074	-156.91	-159.014	-157.972	-156.897	-160.376	-159.376	-157.193	-156.578			32.6	-153.833	-154.133	-155.323	-153.61	-154.451	-153.259	-155.616
32.7	-151.646	-151.659	-149.636	-150.541	-149.115	-154.034	-149.972	-152.239	-152.007	-148.602	-152.904	-154.638	-151.633	-156.907	-158.813	-156.71	-160.184	-160.639			32.7	-152.874	-156.413	-157.384	-156.886	-152.706	-156.725	-157.514	-157.171	-155.81	-157.042	-156.476	-159.075	-157.76	-157.339	-160.604	-159.896	-157.408	-156.816			32.7	-153.698	-154.81	-155.136	-153.447	-154.284	-154.031	-156.481
32.8	-151.513	-152.022	-149.356	-150.535	-149.826	-153.356	-148.81	-152.07	-151.855	-149.387	-152.143	-154.514	-151.728	-157.895	-158.862	-156.678	-161.077	-160.199			32.8	-152.721	-156.436	-157.87	-157.453	-153.565	-156.372	-157.035	-157.801	-155.382	-156.065	-156.786	-158.73	-157.63	-158.871	-161.016	-160.784	-158.012	-156.689			32.8	-153.349	-155.208	-154.922	-153.207	-154.221	-155.239	-156.795
32.9	-152.33	-153.01	-150.097	-150.362	-149.321	-152.74	-148.235	-151.144	-150.931	-150.473	-151.22	-154.478	-151.455	-158.28	-159.24	-156.6	-161.331	-160.401			32.9	-152.731	-156.405	-158.512	-157.745	-154.503	-156.24	-156.673	-158.133	-155.284	-156.081	-157.538	-158.236	-157.86	-160.34	-161.337	-161.552	-158.601	-156.603			32.9	-152.849	-155.044	-154.525	-152.949	-154.345	-156.349	-156.423
33	-153.574	-153.955	-151.226	-150.641	-148.527	-152.574	-148.789	-149.808	-150.164	-151.237	-151.432	-154.334	-151.584	-157.365	-159.976	-156.511	-161.28	-160.768			33	-153.379	-156.475	-159.306	-157.051	-154.953	-155.938	-156.387	-158.348	-155.702	-156.822	-157.986	-157.921	-158.253	-160.852	-161.346	-161.739	-158.472	-156.641			33	-152.59	-154.562	-153.867	-152.729	-154.544	-156.882	-155.38
33.1	-154.182	-154.178	-151.79	-150.882	-148.64	-153.015	-149.89	-148.76	-149.563	-151.345	-152.596	-153.911	-152.196	-156.282	-160.295	-156.525	-161.461	-160.792			33.1	-154.129	-156.404	-159.871	-156.085	-154.741	-155.583	-156.305	-157.982	-156.668	-157.611	-157.806	-157.813	-158.588	-160.417	-161.007	-161.412	-157.664	-156.79			33.1	-152.856	-154.519	-153.464	-152.57	-154.569	-156.375	-154.321
33.2	-153.862	-153.745	-151.917	-150.895	-149.015	-153.59	-151.023	-148.821	-148.958	-150.805	-153.424	-153.855	-152.541	-156.275	-159.599	-156.716	-161.772	-160.621			33.2	-154.318	-156.09	-159.525	-156.053	-154.309	-155.536	-156.432	-156.983	-157.411	-157.923	-157.441	-157.716	-158.86	-159.665	-160.648	-161.052	-156.927	-157.038			33.2	-153.386	-155.073	-153.597	-152.606	-154.644	-155.07	-154.069
33.3	-153.149	-153.102	-152.414	-150.638	-148.786	-153.382	-152.163	-149.982	-149.003	-150	-153.118	-154.753	-152.194	-157.179	-158.661	-156.902	-161.913	-160.447			33.3	-154.083	-155.917	-158.388	-156.877	-154.194	-155.627	-156.514	-156.022	-157.295	-157.571	-157.397	-157.354	-158.929	-159.255	-160.62	-161.12	-156.687	-157.192			33.3	-153.829	-155.626	-153.798	-152.683	-155.086	-154.19	-154.355
33.4	-152.418	-152.73	-153.043	-150	-148.54	-152.796	-152.89	-151.294	-149.922	-149.457	-151.978	-155.963	-151.418	-157.92	-158.351	-156.862	-161.888	-160.198			33.4	-153.859	-156.021	-157.484	-157.578	-154.318	-155.742	-156.608	-155.555	-156.62	-157.038	-157.665	-156.531	-158.896	-159.343	-160.779	-161.132	-156.955	-157.086			33.4	-154.026	-155.738	-153.783	-152.374	-155.763	-154.562	-154.322
33.5	-151.661	-153.063	-152.791	-149.517	-148.952	-152.903	-152.867	-151.793	-151.092	-149.204	-150.956	-156.371	-150.654	-157.453	-158.751	-157.012	-161.612	-159.953			33.5	-153.874	-156.084	-157.247	-157.705	-154.419	-155.899	-157.092	-155.646	-155.759	-156.75	-157.738	-155.819	-158.934	-159.473	-160.995	-160.269	-157.58	-156.896			33.5	-153.922	-155.447	-153.795	-151.952	-156.548	-155.452	-154.232
33.6	-151.098	-153.957	-151.384	-149.706	-149.583	-153.089	-152.285	-151.595	-151.972	-148.734	-150.672	-156.09	-150.226	-155.911	-159.357	-157.941	-160.876	-159.971			33.6	-154.181	-156.122	-157.115	-157.677	-154.446	-155.892	-157.902	-156.131	-154.919	-156.576	-157.332	-156.034	-159.067	-159.444	-161.391	-159.106	-158.076	-156.972			33.6	-153.908	-154.986	-153.872	-152.197	-157.225	-155.815	-154.89
33.7	-151.183	-154.832	-149.933	-150.355	-149.693	-152.641	-151.775	-151.487	-152.375	-148.386	-150.836	-156.084	-150.382	-154.848	-159.637	-159.206	-160.239	-160.307			33.7	-154.872	-156.566	-157.055	-157.987	-154.714	-155.68	-158.51	-156.625	-154.432	-156.338	-156.819	-156.834	-159.27	-159.472	-162.027	-158.893	-158.091	-157.366			33.7	-154.271	-154.728	-153.831	-152.856	-157.303	-155.831	-156.031
33.8	-151.846	-154.767	-149.533	-150.741	-149.022	-152.459	-151.513	-151.566	-152.458	-148.963	-150.97	-156.174	-151.163	-155.268	-159.81	-159.965	-160.835	-160.876			33.8	-155.71	-157.336	-157.463	-158.428	-155.529	-155.442	-158.664	-156.875	-154.337	-156.17	-156.679	-157.356	-159.428	-159.423	-162.586	-159.488	-157.686	-157.803			33.8	-154.456	-154.995	-153.94	-153.172	-156.79	-155.925	-156.613
33.9	-152.592	-153.367	-149.855	-150.544	-148.023	-152.848	-151.011	-151.447	-152.606	-150.189	-151.122	-155.61	-152.062	-156.5	-160.188	-160.029	-162.496	-161.278			33.9	-156.283	-157.818	-157.918	-158.601	-156.572	-155.087	-158.616	-156.824	-154.479	-156.364	-157.001	-157.467	-159.547	-159.028	-162.64	-159.954	-157.031	-158.109			33.9	-154.268	-155.463	-154.491	-153.437	-156.345	-155.704	-156.198
34	-153.327	-151.854	-150.05	-150.054	-147.49	-152.971	-150.256	-151.097	-152.884	-151.14	-151.282	-154.741	-152.295	-157.461	-160.271	-159.389	-163.533	-160.972			34	-156.373	-157.763	-157.793	-158.55	-157.049	-154.825	-158.32	-156.586	-154.839	-156.947	-157.327	-157.366	-159.438	-158.513	-162.229	-160.053	-156.468	-158.153			34	-154.371	-155.635	-154.917	-153.857	-156.407	-154.997	-155.412
34.1	-153.893	-151.603	-150.07	-149.805	-147.753	-152.675	-149.896	-150.658	-152.701	-151.526	-151.181	-154.266	-152.156	-157.833	-159.938	-157.992	-162.969	-160.257			34.1	-156.13	-157.46	-157.354	-158.444	-156.528	-155.077	-157.564	-156.562	-155.285	-157.509	-157.042	-157.264	-158.873	-158.391	-161.788	-159.939	-156.2	-158.004			34.1	-155.011	-155.755	-154.579	-153.703	-156.834	-154.355	-154.952
34.2	-153.557	-152.524	-150.434	-150.235	-148.579	-152.556	-150.349	-150.194	-151.761	-151.564	-150.746	-154.556	-152.807	-157.622	-159.991	-156.447	-161.586	-159.675			34.2	-155.973	-157.21	-157.259	-158.238	-155.509	-155.627	-157.006	-156.618	-155.589	-157.579	-156.322	-157.561	-158.289	-158.796	-161.397	-159.872	-156.069	-158.108			34.2	-155.702	-156.083	-153.87	-152.815	-157.172	-154.254	-155.061
34.3	-152.571	-153.795	-151.246	-151.154	-149.367	-152.921	-151.346	-149.856	-150.729	-151.121	-150.202	-155.5	-153.761	-156.92	-160.674	-155.99	-160.478	-159.248			34.3	-155.762	-157.115	-157.613	-157.871	-154.685	-155.92	-157.158	-156.109	-155.692	-157.368	-156.189	-158.253	-157.878	-159.294	-160.769	-160.077	-156.153	-158.406			34.3	-155.738	-156.062	-153.484	-152.061	-157.054	-154.618	-155.76
34.4	-152.156	-154.767	-151.79	-151.507	-149.306	-153.489	-152.068	-149.813	-150.126	-150.113	-149.929	-156.246	-153.437	-156.156	-161.248	-156.827	-160.202	-159.288			34.4	-155.245	-157.128	-158.057	-157.501	-154.256	-155.714	-157.531	-155.304	-155.599	-157.545	-157.099	-158.749	-157.294	-159.464	-160.139	-160.325	-156.725	-158.288			34.4	-154.82	-155.448	-153.487	-152.159	-156.404	-155.097	-156.661
34.5	-152.522	-155.299	-151.496	-150.569	-148.801	-153.478	-151.992	-149.875	-149.661	-149.315	-150.166	-156.108	-152.431	-155.64	-160.959	-157.53	-160.597	-160.231			34.5	-154.896	-157.166	-158.193	-157.196	-154.206	-155.392	-157.683	-155.132	-155.296	-158.235	-158.231	-158.788	-156.891	-159.433	-160.03	-160.035	-157.8	-157.899			34.5	-153.632	-154.888	-153.694	-152.954	-155.684	-155.526	-157.112
34.6	-153.1	-155.324	-151.073	-149.377	-149.028	-152.773	-151.597	-149.778	-149.24	-149.694	-150.582	-155.406	-152.367	-155.528	-159.815	-157.2	-160.615	-161.391			34.6	-155.019	-157.304	-157.887	-156.739	-154.374	-155.404	-157.629	-155.698	-154.98	-158.983	-158.715	-158.681	-157.304	-159.463	-160.333	-159.018	-158.942	-157.914			34.6	-152.965	-154.741	-154.052	-153.723	-155.439	-155.781	-156.62
34.7	-153.364	-154.696	-151.347	-149.48	-149.857	-152.215	-151.149	-149.357	-149.014	-150.909	-150.685	-154.903	-152.885	-156.06	-158.701	-156.628	-159.907	-161.81			34.7	-155.149	-157.469	-157.591	-156.304	-154.468	-155.546	-157.457	-156.228	-154.825	-159.463	-158.637	-158.861	-158.156	-159.266	-160.8	-158.2	-159.486	-158.265			34.7	-152.971	-154.909	-154.446	-153.773	-155.488	-155.737	-155.278
34.8	-153.218	-154.053	-151.784	-150.565	-150.286	-152.222	-150.525	-148.365	-148.981	-151.814	-150.492	-154.888	-152.755	-156.712	-158.527	-156.715	-159.477	-161.586			34.8	-154.87	-157.239	-157.825	-156.371	-154.37	-155.367	-157.251	-156.123	-154.684	-159.605	-158.356	-159.459	-158.508	-158.79	-161.334	-158.307	-159.455	-158.331			34.8	-153.504	-155.282	-154.608	-153.082	-155.476	-155.413	-153.872
34.9	-153.021	-154.076	-151.728	-151.43	-150.039	-152.493	-150.277	-147.59	-149.068	-151.924	-150.349	-155.156	-152.093	-156.714	-159.118	-157.414	-159.764	-161.185			34.9	-154.478	-156.714	-158.382	-156.736	-154.321	-154.995	-157.177	-155.564	-154.727	-159.452	-157.831	-159.939	-158.118	-158.488	-161.69	-158.798	-159.192	-157.957			34.9	-154.124	-155.476	-154.596	-152.353	-155.538	-154.798	-153.175
35	-152.775	-154.452	-151.314	-151.748	-149.549	-152.663	-150.655	-148.131	-149.099	-151.334	-150.799	-155.697	-151.69	-156.351	-159.48	-158.075	-160.056	-160.786			35	-154.695	-156.39	-158.772	-156.897	-154.612	-154.977	-157.383	-155.324	-155.337	-159.27	-157.082	-159.561	-157.721	-158.234	-161.591	-159.248	-158.711	-157.444			35	-154.1	-155.108	-154.575	-151.996	-155.918	-153.995	-153.529
35.1	-152.335	-154.948	-150.7	-151.606	-149.411	-152.527	-151.353	-149.294	-148.93	-150.462	-151.985	-156.234	-151.734	-156.037	-159.217	-158.099	-160.068	-160.574			35.1	-155.451	-156.136	-158.8	-157.088	-155.263	-155.238	-157.748	-155.945	-155.988	-159.149	-156.417	-158.505	-157.956	-157.741	-160.975	-159.835	-158.273	-157.16			35.1	-153.352	-154.374	-154.578	-151.8	-156.708	-153.411	-154.576
35.2	-151.973	-155.549	-150.132	-151.186	-149.794	-152.442	-152.068	-150.123	-148.755	-149.702	-153.084	-155.997	-151.909	-155.666	-159.174	-157.434	-160.263	-160.642			35.2	-155.939	-155.757	-158.665	-157.532	-156.025	-155.224	-158.072	-156.861	-155.89	-159.006	-156.098	-157.686	-158.499	-157.354	-160.229	-160.51	-158.126	-157.441			35.2	-152.781	-153.834	-154.65	-151.851	-157.558	-153.377	-155.423
35.3	-151.909	-155.469	-150.077	-150.976	-150.091	-152.937	-151.977	-150.667	-149.04	-149.142	-153.348	-155.135	-151.999	-155.441	-159.961	-156.777	-160.784	-161.002			35.3	-155.9	-155.554	-158.593	-157.771	-156.45	-155.135	-158.244	-157.111	-155.426	-158.898	-156.147	-157.436	-158.845	-157.353	-159.888	-160.883	-157.954	-158.279			35.3	-152.888	-153.821	-154.549	-152.311	-157.75	-153.679	-155.528
35.4	-152.042	-154.553	-150.277	-150.915	-150.084	-153.726	-150.908	-150.728	-149.942	-149.083	-152.953	-154.576	-152.345	-155.806	-160.815	-156.836	-161.239	-161.613			35.4	-155.658	-155.542	-158.428	-157.627	-156.247	-155.541	-157.896	-156.852	-155.399	-158.747	-156.449	-157.527	-159.077	-157.661	-160.142	-160.945	-157.5	-159.062			35.4	-153.279	-154.494	-154.108	-152.855	-157.266	-153.826	-155.143
35.5	-152.257	-153.994	-149.98	-150.448	-150.209	-154.318	-150.15	-150.151	-150.975	-149.589	-152.33	-154.561	-152.935	-156.6	-160.587	-157.537	-161.265	-162.027			35.5	-155.371	-155.489	-158.097	-157.551	-155.62	-156.115	-157.109	-156.844	-155.75	-158.528	-156.833	-157.876	-159.292	-158.167	-160.639	-161.117	-156.937	-159.117			35.5	-153.544	-155.876	-153.817	-153.25	-156.658	-153.678	-154.848
35.6	-152.198	-154.156	-149.547	-150.015	-150.433	-154.798	-150.479	-149.529	-151.42	-150.014	-151.758	-155.024	-153.038	-157.032	-159.554	-158.419	-160.769	-161.791			35.6	-155.118	-155.345	-157.769	-157.748	-154.909	-156.027	-156.721	-156.953	-155.859	-158.706	-157.104	-158.26	-159.231	-158.821	-160.902	-161.339	-156.468	-158.573			35.6	-153.644	-157.289	-154.238	-153.45	-156.11	-153.72	-155.042
35.7	-151.557	-154.051	-150.11	-150.602	-150.506	-155.272	-151.403	-149.28	-151.245	-150.045	-151.494	-155.726	-152.333	-156.726	-159.04	-159.199	-160.29	-161.113			35.7	-155.259	-155.215	-157.393	-158.126	-154.344	-155.254	-157.118	-156.746	-155.51	-159.502	-157.228	-158.393	-158.865	-159.595	-161.078	-161.059	-156.19	-158.027			35.7	-153.751	-157.546	-155.085	-153.585	-155.717	-154.261	-155.452
35.8	-150.792	-153.421	-151.369	-151.762	-150.488	-155.307	-152.547	-149.001	-151.067	-149.83	-151.471	-156.004	-151.308	-155.913	-159.509	-159.664	-160.505	-160.568			35.8	-155.916	-155.401	-157.004	-158.764	-154.19	-154.772	-157.752	-156.355	-154.981	-160.286	-157.246	-158.348	-158.517	-159.991	-161.483	-160.183	-156.116	-157.512			35.8	-153.862	-156.592	-155.607	-154.044	-155.611	-154.91	-155.451
35.9	-150.679	-153.052	-151.894	-152.283	-150.23	-154.39	-153.602	-148.438	-150.87	-149.32	-151.559	-155.727	-150.83	-154.989	-160.312	-159.51	-161.074	-160.418			35.9	-156.677	-155.976	-156.874	-159.534	-154.706	-155.206	-158.11	-156.026	-154.536	-160.464	-157.153	-158.124	-158.239	-159.476	-161.714	-159.341	-156.156	-156.738			35.9	-153.677	-155.643	-155.454	-154.828	-155.681	-155.046	-155.208
36	-151.44	-153.231	-151.532	-151.991	-149.659	-152.771	-153.769	-148.029	-150.432	-148.521	-151.678	-155.31	-151.119	-154.438	-160.608	-158.574	-161.104	-160.658			36	-156.984	-156.468	-157.031	-159.906	-155.694	-155.884	-158.339	-155.69	-154.438	-160.079	-156.98	-157.714	-157.71	-158.375	-161.344	-159.146	-156.274	-155.987			36	-153.138	-155.274	-154.953	-155.219	-155.724	-154.484	-155.104
36.1	-152.471	-153.28	-151.128	-151.575	-149.221	-151.311	-152.819	-148.358	-150.421	-147.916	-151.499	-154.879	-151.453	-154.551	-160.062	-157.286	-160.551	-161.343			36.1	-156.603	-156.478	-157.456	-159.535	-156.166	-155.983	-158.425	-155.402	-154.778	-159.375	-156.677	-157.534	-157.118	-157.383	-160.666	-159.643	-156.51	-155.817			36.1	-152.805	-155.248	-154.577	-154.431	-155.44	-154.232	-154.885
36.2	-153.045	-152.672	-151.008	-151.357	-149.106	-150.763	-151.661	-149.611	-151.166	-148.408	-151.163	-154.459	-151.652	-154.958	-159.126	-156.761	-160.392	-162.167			36.2	-155.932	-156.105	-158.023	-158.798	-155.47	-155.684	-158.262	-155.506	-155.173	-158.677	-156.02	-157.694	-157.226	-156.82	-160.146	-160.287	-156.891	-156.155			36.2	-153.188	-155.373	-154.157	-152.824	-154.796	-155.331	-154.668
36.3	-153.058	-152.024	-151.152	-151.205	-149.275	-151.473	-150.961	-151.363	-151.81	-149.873	-151.388	-154.531	-151.977	-154.89	-158.572	-157.439	-161.05	-162.453			36.3	-155.504	-155.64	-158.138	-158.385	-154.241	-155.251	-158.351	-156.068	-155.328	-158.15	-155.26	-157.862	-158.171	-157	-159.984	-160.372	-157.146	-156.407			36.3	-154.094	-155.338	-153.478	-151.794	-154.259	-156.649	-155.014
36.4	-152.58	-152.182	-151.434	-151.266	-149.936	-152.68	-150.697	-152.699	-151.452	-150.749	-152.288	-155.275	-152.231	-154.304	-158.914	-158.454	-161.668	-161.818			36.4	-155.682	-155.371	-157.595	-158.302	-153.438	-154.639	-158.813	-156.786	-155.27	-157.837	-155.103	-157.832	-159.237	-157.975	-160.069	-159.949	-156.797	-156.404			36.4	-154.796	-154.893	-152.923	-151.963	-154.185	-156.404	-155.646
36.5	-151.428	-152.943	-151.448	-151.585	-150.594	-153.102	-150.973	-152.729	-149.93	-150.322	-153.231	-155.874	-152.239	-153.898	-159.864	-159.19	-161.639	-160.647			36.5	-156.41	-155.629	-156.905	-158.203	-153.359	-154.224	-159.079	-157.329	-155.12	-158.115	-155.702	-157.756	-159.815	-158.797	-160.186	-159.583	-156.125	-156.389			36.5	-154.682	-154.219	-152.804	-152.675	-154.658	-155.366	-155.717
36.6	-150.014	-153.756	-151.341	-151.674	-150.366	-152.917	-151.46	-151.723	-148.437	-149.507	-153.566	-155.654	-152.363	-154.044	-160.405	-159.873	-161.13	-159.701			36.6	-157.007	-156.418	-156.386	-158.219	-153.936	-154.373	-158.931	-157.451	-155.225	-158.987	-156.387	-158.139	-159.865	-158.722	-160.309	-159.399	-156.017	-156.401			36.6	-153.994	-153.619	-153.099	-153.383	-155.608	-155.321	-155.122
36.7	-149.588	-154.661	-151.508	-151.42	-149.63	-153.218	-151.577	-150.886	-148.344	-149.11	-153.019	-155.061	-152.944	-154.787	-160.235	-160.502	-160.285	-159.611			36.7	-157.039	-157.248	-156.235	-158.239	-154.76	-154.878	-158.662	-156.89	-155.768	-159.69	-156.454	-158.875	-159.696	-158.218	-160.287	-159.513	-156.51	-156.313			36.7	-153.6	-153.372	-153.5	-153.931	-156.496	-156.012	-154.642
36.8	-150.726	-155.541	-151.712	-151.311	-149.327	-154.242	-151.558	-150.676	-149.259	-149.279	-151.929	-154.999	-153.272	-155.912	-160.039	-160.782	-159.402	-160.343			36.8	-156.797	-157.811	-156.516	-157.725	-154.921	-155.185	-158.651	-155.911	-156.197	-159.816	-156.014	-158.947	-159.626	-158.095	-159.899	-160.094	-156.778	-156.089			36.8	-153.723	-153.534	-153.684	-153.842	-156.711	-156.128	-154.882
36.9	-152.626	-155.774	-151.74	-151.46	-149.403	-155.415	-151.779	-150.641	-150.149	-149.782	-151.19	-155.52	-152.793	-156.927	-160.179	-160.65	-159.19	-160.905			36.9	-156.559	-157.909	-156.894	-156.874	-154.237	-154.985	-159.033	-155.399	-155.811	-159.364	-155.753	-158.388	-159.739	-158.366	-159.503	-160.781	-156.661	-155.933			36.9	-153.63	-153.847	-153.759	-153.106	-156.292	-155.407	-155.537
37	-154.012	-155.194	-151.825	-151.422	-149.433	-156.049	-151.964	-150.608	-150.88	-150.266	-151.166	-155.966	-152.289	-157.246	-160.334	-159.708	-159.69	-160.601			37	-156.283	-157.291	-157.403	-156.52	-153.679	-154.724	-159.427	-155.564	-154.932	-158.701	-156.059	-158.304	-159.687	-158.575	-159.601	-161.166	-156.866	-156.135			37	-153.226	-154.205	-154.024	-152.7	-155.713	-154.429	-155.877
37.1	-154.062	-154.316	-152.104	-150.908	-149.394	-155.739	-151.923	-150.798	-151.599	-150.589	-151.561	-156.02	-152.269	-156.722	-160.214	-157.933	-160.401	-159.821			37.1	-155.968	-156.299	-158.161	-156.955	-153.952	-154.943	-159.27	-155.888	-154.647	-158.623	-156.767	-158.733	-159.056	-158.685	-160.14	-161.067	-157.537	-156.631			37.1	-153.322	-154.856	-154.473	-153.082	-155.388	-153.815	-155.736
37.2	-152.979	-153.581	-152.291	-150.407	-149.451	-154.95	-151.851	-151.087	-152.076	-150.661	-152.28	-155.721	-152.133	-156.174	-160.02	-156.638	-161.232	-159.233			37.2	-155.561	-155.474	-158.56	-157.697	-154.563	-155.47	-158.657	-156.267	-155.349	-158.974	-157.451	-158.855	-158.182	-158.467	-160.875	-160.427	-157.985	-156.956			37.2	-153.999	-155.496	-154.858	-153.536	-155.403	-153.964	-155.6
37.3	-151.925	-153.26	-151.929	-150.62	-149.937	-154.553	-151.789	-151.232	-151.966	-150.412	-152.777	-155.115	-151.583	-156.183	-160.023	-156.652	-162.114	-159.168			37.3	-155.083	-154.96	-158.25	-158.055	-154.611	-155.887	-158.099	-156.712	-156.342	-158.853	-157.854	-158.462	-157.909	-157.691	-161.611	-159.708	-157.743	-156.957			37.3	-154.407	-155.254	-154.984	-153.36	-155.453	-154.686	-155.763
37.4	-151.679	-153.551	-151.049	-151.627	-150.64	-154.484	-151.773	-151.277	-151.323	-149.972	-152.295	-154.546	-151.055	-156.418	-159.998	-157.344	-162.73	-159.533			37.4	-154.796	-154.924	-157.851	-158.034	-154.298	-155.793	-157.778	-156.896	-156.847	-158.455	-157.929	-158.163	-158.397	-156.688	-161.969	-159.627	-157.056	-157.104			37.4	-154.148	-154.39	-154.717	-152.784	-155.035	-155.107	-155.994
37.5	-151.93	-154.483	-150.53	-152.743	-150.843	-154.034	-151.778	-151.338	-150.671	-149.573	-151.386	-154.51	-151.294	-156.692	-159.68	-158.1	-162.754	-159.809			37.5	-154.648	-155.328	-157.713	-158.094	-154.319	-155.318	-157.647	-156.656	-156.727	-158.469	-157.706	-158.306	-158.996	-156.16	-161.708	-160.063	-156.619	-157.676			37.5	-153.951	-153.867	-154.221	-152.312	-154.238	-154.809	-155.882
37.6	-152.323	-155.683	-150.977	-152.925	-150.507	-153.026	-151.829	-151.235	-150.578	-149.201	-151.209	-154.99	-152.608	-157.311	-159.188	-158.983	-161.969	-159.708			37.6	-154.45	-155.82	-157.682	-158.088	-154.424	-155.419	-157.545	-156.322	-156.363	-158.647	-157.499	-158.396	-159.079	-156.603	-161.158	-160.44	-156.7	-158.41			37.6	-154.31	-153.84	-153.965	-151.867	-153.816	-154.258	-155.266
37.7	-152.621	-156.279	-151.636	-152.003	-150.223	-151.854	-152.1	-150.813	-151.244	-148.794	-151.797	-155.345	-153.746	-157.972	-158.887	-160.115	-160.522	-159.891			37.7	-154.384	-156.398	-157.608	-157.851	-154.164	-156.415	-157.333	-156.289	-155.848	-158.567	-157.672	-158.236	-158.427	-157.509	-160.795	-160.691	-156.89	-158.908			37.7	-154.494	-153.983	-154.342	-151.465	-154.155	-153.909	-154.503
37.8	-152.344	-155.627	-151.166	-151.229	-150.07	-151.217	-152.382	-150.314	-152.074	-148.801	-152.337	-154.782	-153.328	-157.837	-158.91	-161.162	-159.112	-160.936			37.8	-154.475	-157.08	-157.285	-157.711	-153.814	-157.615	-157.106	-156.579	-154.985	-158.527	-157.932	-158.141	-157.473	-157.966	-160.636	-160.939	-156.87	-158.908			37.8	-154.075	-153.913	-155.025	-151.59	-154.709	-153.717	-153.895
37.9	-151.374	-154.211	-149.862	-151.68	-149.556	-151.698	-152.344	-150.167	-151.904	-149.738	-152.501	-153.621	-151.887	-157.07	-158.848	-161.487	-158.611	-161.808			37.9	-154.494	-157.545	-156.849	-158.021	-153.684	-158.491	-157.064	-156.879	-154.197	-158.778	-157.962	-157.998	-157.039	-157.895	-160.778	-161.107	-156.747	-158.302			37.9	-153.51	-153.536	-155.234	-152.238	-154.78	-153.497	-153.299
38	-150.272	-153.262	-149.46	-152.597	-148.792	-152.942	-152.183	-150.26	-150.795	-150.977	-152.655	-153.043	-151.142	-156.545	-158.5	-161.017	-159.263	-161.408			38	-154.589	-157.593	-156.704	-158.646	-153.796	-158.745	-157.231	-156.9	-154.392	-158.983	-158.008	-157.561	-157.413	-157.864	-161.48	-160.964	-156.725	-157.328			38	-153.096	-153.405	-154.903	-152.863	-154.401	-153.528	-152.75
38.1	-149.886	-153.241	-150.053	-152.725	-148.46	-153.616	-152.129	-149.933	-150.336	-151.236	-153.109	-153.2	-151.859	-156.587	-158.341	-160.253	-160.421	-160.456			38.1	-155.058	-157.249	-156.848	-158.902	-154.315	-158.178	-157.253	-156.629	-155.532	-159.076	-158.195	-157.126	-158.233	-158.214	-162.156	-160.32	-156.908	-156.608			38.1	-152.816	-153.94	-154.37	-153.305	-154.091	-154.134	-152.507
38.2	-150.61	-153.484	-150.267	-152.116	-148.529	-152.898	-152.132	-149.522	-150.857	-150.388	-153.617	-153.457	-153.17	-156.787	-158.806	-159.292	-161.214	-160.189			38.2	-155.582	-156.558	-156.864	-158.542	-155.283	-157.172	-156.89	-156.409	-156.425	-159.431	-158.344	-157.148	-158.967	-158.784	-161.855	-159.491	-157.055	-156.482			38.2	-152.407	-154.657	-153.512	-153.653	-154.075	-154.95	-152.682
38.3	-151.738	-153.356	-149.74	-151.533	-148.54	-151.874	-152.014	-150.212	-151.403	-149.525	-153.679	-153.609	-153.937	-156.299	-159.616	-158.083	-161.404	-160.861			38.3	-155.616	-155.628	-156.712	-157.975	-156.331	-156.218	-156.412	-156.52	-156.324	-159.87	-158.221	-157.671	-159.336	-159.132	-160.781	-159.062	-156.811	-156.63			38.3	-151.972	-154.782	-152.856	-154.03	-154.141	-155.644	-153.07
38.4	-152.032	-152.971	-149.302	-151.589	-148.677	-152.049	-151.519	-151.715	-151.804	-149.489	-152.959	-153.935	-153.918	-155.097	-160.096	-157.052	-161.267	-161.544			38.4	-154.973	-155.074	-156.977	-157.485	-156.901	-155.366	-156.252	-156.708	-155.683	-159.795	-157.834	-158.381	-159.448	-159.027	-159.952	-159.149	-156.506	-156.825			38.4	-152.148	-154.376	-153.249	-154.413	-154.177	-156.231	-153.299
38.5	-151.341	-152.823	-149.592	-152.11	-149.035	-153.098	-150.972	-152.449	-152.142	-150.373	-151.916	-154.632	-153.324	-154.473	-160.027	-156.866	-161.064	-161.345			38.5	-153.87	-155.444	-157.491	-157.137	-156.502	-154.609	-156.565	-156.373	-155.413	-159.324	-157.648	-158.695	-159.52	-158.74	-159.883	-159.418	-156.603	-157.076			38.5	-152.941	-154.258	-153.971	-154.445	-154.396	-156.399	-153.54
38.6	-150.844	-152.73	-150.272	-152.319	-149.091	-153.691	-150.868	-151.964	-152.027	-151.473	-151.431	-155.325	-152.567	-155.35	-159.51	-157.748	-160.658	-160.885			38.6	-153.131	-156.326	-157.516	-157.12	-155.248	-154.139	-157.17	-155.362	-155.895	-158.956	-157.781	-158.474	-159.664	-158.674	-160.227	-159.513	-156.983	-157.27			38.6	-153.654	-154.762	-154.037	-154.219	-154.839	-156.017	-154.145
38.7	-151.033	-152.13	-150.762	-152.227	-148.625	-153.394	-151.015	-151.195	-151.375	-151.459	-151.467	-155.75	-152.427	-156.668	-159.065	-158.66	-159.666	-161.231			38.7	-153.235	-156.881	-157.224	-157.58	-154.208	-154.263	-157.802	-154.529	-156.566	-158.659	-157.908	-158.439	-159.58	-158.719	-160.295	-159.294	-157.131	-157.423			38.7	-153.873	-155.308	-153.904	-154.317	-155.227	-155.467	-154.817
38.8	-151.689	-151.727	-151.263	-152.37	-148.378	-152.947	-151.256	-150.97	-150.486	-150.149	-151.459	-156.054	-153.092	-157.015	-159.173	-158.575	-158.303	-162.046			38.8	-153.546	-156.592	-157.291	-158.158	-154.181	-155.012	-158.297	-154.741	-156.866	-158.306	-157.853	-159.063	-158.809	-158.543	-159.957	-159.053	-156.801	-157.591			38.8	-153.775	-155.339	-154.139	-154.61	-155.384	-154.892	-155.307
38.9	-152.449	-152.499	-152.1	-152.723	-148.984	-153.233	-151.779	-151.219	-149.66	-148.742	-151.479	-156.062	-153.464	-156.46	-159.305	-157.992	-157.375	-162.083			38.9	-153.514	-155.86	-157.77	-158.265	-154.658	-155.916	-158.549	-155.629	-156.823	-157.978	-157.715	-159.746	-157.678	-158.309	-159.72	-159.007	-156.547	-157.564			38.9	-153.904	-154.845	-154.287	-154.454	-155.403	-154.381	-155.817
39	-152.402	-153.921	-152.774	-152.866	-149.741	-154.237	-152.457	-151.321	-149.204	-148.33	-151.755	-155.549	-152.843	-155.78	-159.238	-157.514	-157.445	-161.03			39	-153.469	-155.79	-158.046	-157.876	-155.007	-156.495	-158.711	-156.422	-156.607	-157.677	-157.94	-159.561	-157.196	-158.541	-159.812	-159.025	-156.828	-157.164			39	-154.465	-154.098	-154.011	-153.803	-155.358	-154.315	-156.314
39.1	-151.585	-155.101	-152.666	-152.547	-149.965	-155.232	-153.002	-150.927	-149.368	-149.107	-152.011	-154.485	-152.047	-155.41	-159.444	-156.996	-158.16	-159.806			39.1	-153.656	-156.495	-157.918	-157.521	-155.167	-156.64	-159.171	-156.991	-156.44	-157.581	-158.646	-158.558	-157.816	-159.191	-159.944	-159.043	-157.244	-156.528			39.1	-154.798	-153.349	-153.759	-153.296	-155.135	-154.753	-156.44
39.2	-151.069	-155.682	-151.91	-152.016	-150.05	-155.531	-153.327	-150.225	-150.042	-150.128	-152.144	-153.263	-151.81	-155.082	-159.901	-156.575	-158.565	-159.34			39.2	-153.856	-156.98	-157.786	-157.663	-155.019	-156.617	-159.739	-157.275	-156.406	-157.899	-159.039	-157.589	-158.95	-159.381	-160.098	-159.079	-157.305	-155.854			39.2	-154.338	-152.784	-153.88	-153.333	-154.676	-155.141	-156.179
39.3	-151.16	-155.487	-151.105	-151.434	-150.371	-154.972	-153.044	-149.733	-150.734	-150.213	-152.259	-153.015	-151.734	-154.459	-159.968	-156.615	-158.399	-159.672			39.3	-153.985	-156.865	-157.793	-158.088	-154.668	-156.724	-159.705	-157.066	-156.259	-158.448	-158.639	-157.192	-159.484	-158.698	-160.618	-159.278	-156.899	-155.398			39.3	-153.661	-152.549	-154.197	-153.386	-154.203	-154.99	-156.176
39.4	-151.501	-154.535	-150.584	-150.772	-150.74	-154.227	-152.052	-150.028	-151.194	-149.546	-152.218	-154.201	-151.542	-154.107	-159.334	-156.928	-158.252	-160.326			39.4	-154.278	-156.602	-157.735	-158.104	-154.559	-156.693	-158.87	-156.633	-156.027	-158.872	-158.076	-157.144	-159.127	-157.942	-161.453	-159.69	-156.249	-155.304			39.4	-153.535	-152.711	-154.25	-153.001	-153.913	-154.436	-156.599
39.5	-152.066	-153.665	-150.262	-150.341	-150.781	-154.024	-151.186	-150.67	-151.295	-149.217	-152	-155.601	-151.63	-154.593	-158.721	-157.1	-158.779	-160.862			39.5	-154.644	-156.653	-157.746	-157.57	-154.831	-156.162	-157.933	-156.449	-156.105	-158.997	-157.96	-156.995	-158.657	-157.668	-161.825	-160.071	-155.846	-155.396			39.5	-153.652	-153.079	-153.72	-152.542	-153.912	-154.016	-156.715
39.6	-152.63	-153.663	-150.16	-150.277	-150.387	-154.421	-151.034	-150.56	-150.757	-149.507	-152.096	-155.956	-151.926	-155.7	-158.986	-157.219	-159.987	-160.866			39.6	-154.492	-157.182	-157.89	-157.055	-155.075	-155.454	-157.754	-156.388	-156.323	-158.927	-158.12	-156.792	-158.52	-157.798	-161.288	-160.13	-155.967	-155.5			39.6	-153.606	-153.311	-152.879	-152.278	-154.082	-154.16	-156.205
39.7	-152.28	-153.925	-150.501	-150.464	-149.968	-154.907	-151.406	-149.697	-149.775	-149.877	-152.511	-155.508	-152.406	-156.718	-159.847	-157.548	-160.977	-160.227			39.7	-153.501	-158	-157.671	-156.977	-155.006	-155.193	-158.154	-156.226	-156.174	-159.076	-158.079	-156.846	-158.65	-158.503	-160.667	-159.703	-156.441	-155.665			39.7	-153.893	-153.355	-152.38	-152.481	-154.174	-154.697	-155.199
39.8	-150.89	-154.015	-151.176	-150.788	-149.897	-154.74	-151.786	-148.87	-149.227	-149.899	-152.502	-155.025	-153.238	-156.961	-160.722	-158.189	-160.974	-159.565			39.8	-152.096	-158.666	-157.086	-157.095	-155.001	-155.491	-158.357	-156.206	-155.655	-159.667	-157.674	-157.219	-158.993	-159.532	-160.577	-158.762	-156.98	-155.981			39.8	-154.816	-153.345	-152.503	-153.327	-154.389	-155.016	-153.972
39.9	-149.883	-154.379	-151.425	-150.904	-150.185	-153.731	-151.783	-148.568	-149.412	-149.578	-151.768	-154.705	-153.847	-156.543	-161.601	-158.656	-160.375	-159.583			39.9	-151.21	-158.591	-156.898	-157.003	-155.462	-155.84	-158.235	-156.527	-155.174	-160.093	-157.227	-157.739	-159.187	-160.042	-160.506	-157.814	-157.298	-156.263			39.9	-155.771	-153.403	-152.993	-154.083	-154.877	-154.794	-153.399
40	-150.296	-154.658	-150.942	-150.751	-150.647	-152.609	-151.389	-148.797	-149.797	-149.252	-150.859	-154.707	-154.157	-156.01	-161.819	-158.093	-159.757	-160.033			40	-151.313	-157.612	-157.324	-156.587	-156.129	-155.794	-157.963	-156.814	-155.114	-159.747	-157.14	-158.214	-159.106	-159.912	-160.329	-157.635	-157.012	-156.208			40	-155.979	-153.581	-153.327	-154.171	-155.337	-154.318	-154.137
40.1	-151.441	-154.144	-150.544	-150.539	-150.998	-151.847	-150.378	-149.36	-150.145	-149.269	-150.394	-155.151	-154.732	-155.534	-160.606	-156.723	-159.256	-160.162			40.1	-152.109	-156.377	-157.732	-156.117	-156.499	-155.491	-157.481	-156.699	-155.534	-159.04	-157.378	-158.54	-159.286	-159.434	-160.438	-158.23	-156.189	-156.094			40.1	-155.268	-153.744	-153.101	-154.002	-155.679	-154.003	-155.336
40.2	-152.272	-153.295	-150.31	-150.088	-151.164	-151.178	-148.756	-150.202	-150.678	-149.638	-150.301	-155.601	-155.12	-155.399	-158.96	-156.012	-159.311	-159.813			40.2	-153.178	-155.77	-157.469	-156.187	-156.272	-155.332	-156.814	-156.579	-155.999	-158.681	-157.511	-158.54	-159.664	-158.634	-160.707	-158.813	-155.759	-156.521			40.2	-154.331	-153.781	-152.461	-153.823	-155.709	-153.918	-155.513
40.3	-152.544	-152.897	-149.731	-149.749	-151.227	-151.057	-147.889	-150.818	-151.426	-149.876	-150.284	-155.456	-154.692	-155.735	-158.383	-156.685	-160.105	-159.408			40.3	-154.17	-156.018	-156.681	-156.806	-155.552	-155.55	-156.187	-156.874	-156.053	-158.892	-157.445	-158.115	-159.487	-158.032	-160.847	-158.874	-156.283	-157.401			40.3	-153.769	-153.775	-152.075	-153.533	-155.064	-153.912	-154.698
40.4	-152.403	-152.755	-149.474	-150.439	-151.03	-152.412	-148.931	-150.59	-151.805	-149.721	-150.463	-154.489	-153.775	-156	-158.93	-157.917	-161.038	-159.418			40.4	-154.664	-156.69	-156.258	-157.094	-154.773	-155.891	-156.039	-157.301	-155.727	-159.383	-157.575	-157.5	-158.756	-158.266	-160.881	-158.803	-157.272	-158.098			40.4	-153.491	-153.644	-152.39	-153.647	-154.09	-154.003	-154.065
40.5	-152.1	-152.633	-150.089	-151.859	-150.29	-154.444	-151.192	-149.953	-151.333	-149.782	-150.855	-153.462	-152.872	-155.782	-159.407	-158.737	-161.664	-159.993			40.5	-154.604	-157.319	-156.467	-156.656	-154.303	-155.854	-156.622	-157.602	-155.409	-159.613	-158.132	-157.02	-158.13	-158.829	-160.866	-159.267	-157.896	-158.123			40.5	-153.356	-153.204	-153.156	-154.551	-153.376	-153.919	-154.124
40.6	-151.869	-153.052	-150.96	-152.388	-149.309	-155.398	-153.252	-149.643	-150.725	-150.475	-151.409	-153.337	-152.324	-155.511	-159.185	-158.918	-161.751	-160.891			40.6	-154.354	-157.657	-156.867	-156.229	-154.378	-155.632	-157.479	-157.622	-155.52	-159.322	-158.816	-156.746	-157.816	-158.908	-160.761	-160.07	-157.704	-157.578			40.6	-153.412	-152.737	-153.82	-155.343	-152.967	-153.281	-154.809
40.7	-151.63	-153.932	-151.44	-151.415	-149.131	-154.896	-154.237	-149.496	-150.568	-151.066	-152.101	-153.723	-152.429	-155.48	-158.772	-158.753	-161.404	-161.871			40.7	-154.023	-157.681	-157.514	-156.428	-154.923	-155.714	-158.337	-157.108	-156.049	-158.793	-159.18	-156.514	-157.728	-158.612	-160.689	-160.38	-156.904	-157.157			40.7	-153.684	-152.578	-154.003	-155.114	-152.786	-152.672	-156.068
40.8	-151.289	-154.375	-151.469	-150.242	-149.796	-153.914	-153.922	-149.14	-150.413	-150.941	-152.716	-153.951	-153.196	-155.152	-158.522	-158.686	-161.251	-162.222			40.8	-153.394	-157.347	-158.594	-157.104	-155.575	-155.635	-159.3	-156.485	-156.295	-158.362	-159.217	-156.433	-157.998	-158.561	-160.879	-160.028	-156.172	-157.031			40.8	-154.005	-152.464	-153.903	-154.377	-152.917	-152.963	-157.262
40.9	-150.82	-154.335	-151.148	-149.905	-149.935	-153.316	-152.587	-148.587	-150.132	-150.407	-152.939	-154.179	-154.049	-154.813	-158.546	-159.046	-161.348	-161.111			40.9	-152.901	-156.646	-159.463	-157.911	-156.008	-154.836	-159.789	-156.353	-155.969	-158.377	-159.145	-156.851	-158.591	-159.033	-161.128	-159.578	-155.983	-156.733			40.9	-154.099	-152.417	-153.906	-153.992	-153.297	-154.14	-157.405
41	-150.431	-154.245	-150.423	-149.936	-149.396	-153.309	-151.141	-148.132	-149.791	-149.941	-152.778	-154.33	-154.215	-155.572	-159.052	-159.829	-161.085	-159.547			41	-153.108	-156.2	-159.435	-158.363	-156.281	-153.829	-159.322	-156.341	-155.76	-158.973	-158.955	-157.631	-158.986	-159.613	-160.893	-159.389	-156.038	-156.241			41	-153.981	-153.046	-153.854	-153.957	-153.733	-155.272	-156.764
41.1	-150.731	-154.065	-149.596	-149.845	-149.359	-153.916	-150.384	-148.377	-149.417	-149.715	-152.569	-154.135	-153.577	-156.946	-159.838	-160.294	-160.53	-159.493			41.1	-153.646	-156.501	-158.757	-158.012	-156.57	-153.19	-158.499	-155.949	-155.959	-159.384	-158.705	-158.225	-158.97	-159.733	-160.13	-159.528	-155.947	-155.964			41.1	-154.026	-154.425	-153.677	-153.811	-154.075	-155.309	-156.37
41.2	-151.739	-153.723	-149.47	-149.846	-149.858	-154.652	-150.258	-149.563	-149.428	-149.632	-152.43	-153.973	-152.477	-157.281	-160.321	-159.762	-160.229	-160.799			41.2	-154.11	-157.087	-158.113	-157.108	-156.633	-152.958	-157.894	-155.543	-156.006	-158.914	-158.778	-158.349	-158.947	-159.491	-159.243	-159.968	-156.065	-156.099			41.2	-154.215	-155.926	-153.907	-153.33	-154.226	-154.48	-156.418
41.3	-152.469	-153.297	-150.294	-150.02	-149.94	-154.625	-150.41	-150.684	-149.866	-149.765	-152.039	-154.353	-151.438	-156.188	-159.775	-158.992	-159.873	-162.18			41.3	-154.666	-157.198	-158.102	-156.349	-156.362	-153.272	-157.235	-155.48	-155.602	-157.965	-159.172	-158.204	-159.054	-159.209	-158.577	-160.392	-156.613	-156.432			41.3	-154.115	-156.568	-154.763	-152.9	-154.223	-153.883	-156.426
41.4	-152.442	-152.971	-151.272	-150.38	-149.604	-154.136	-150.468	-150.481	-150.241	-149.974	-151.317	-155.233	-151.368	-154.909	-158.135	-158.878	-159.061	-163.047			41.4	-155.137	-156.615	-158.754	-156.247	-156.267	-154.006	-156.55	-155.575	-155.215	-157.317	-159.358	-158.043	-159.061	-158.688	-158.288	-160.288	-157.063	-156.573			41.4	-154.059	-155.909	-155.691	-153.185	-154.075	-153.785	-156.114
41.5	-152.264	-153.061	-151.771	-150.755	-149.573	-154.113	-150.359	-149.211	-150.435	-149.786	-150.951	-155.79	-152.348	-154.696	-156.839	-159.103	-158.719	-162.949			41.5	-155.132	-155.95	-159.226	-156.834	-156.535	-154.632	-156.611	-155.913	-155.198	-157.267	-159.224	-157.979	-158.864	-157.958	-158.328	-159.588	-157.112	-156.537			41.5	-154.606	-154.889	-155.978	-154.136	-154.034	-153.987	-155.948
41.6	-152.422	-153.407	-151.731	-150.535	-150.006	-154.499	-150.679	-148.487	-150.618	-149.398	-151.306	-155.043	-153.106	-155.361	-157.204	-159.244	-159.573	-162.112			41.6	-154.677	-155.812	-158.695	-157.363	-156.51	-154.948	-157.5	-156.786	-155.001	-157.57	-159.015	-158.181	-158.629	-157.662	-158.692	-158.883	-157.162	-156.634			41.6	-155.192	-154.545	-155.482	-154.793	-154.624	-154.461	-156.401
41.7	-152.886	-153.471	-151.606	-149.89	-150.45	-154.719	-151.207	-149.219	-150.802	-149.282	-151.786	-153.215	-152.988	-156.087	-158.608	-159.33	-160.613	-161.287			41.7	-154.009	-155.916	-157.599	-157.392	-155.791	-154.891	-158.339	-157.801	-154.325	-157.963	-158.755	-158.536	-158.638	-158.013	-159.554	-158.6	-157.599	-156.823			41.7	-155.191	-154.878	-154.817	-154.524	-155.507	-154.667	-157.006
41.8	-153.463	-153.149	-151.9	-149.929	-150.597	-154.556	-151.201	-150.559	-151.066	-149.415	-151.976	-151.657	-152.79	-156.583	-159.766	-159.155	-160.733	-160.391			41.8	-153.461	-155.856	-156.865	-157.38	-154.82	-154.324	-158.753	-158.223	-153.977	-158.305	-158.624	-158.504	-158.905	-158.667	-160.866	-158.64	-158.164	-156.82			41.8	-154.876	-155.418	-154.424	-153.779	-155.642	-154.418	-156.996
41.9	-153.61	-152.836	-152.292	-150.779	-150.642	-154.171	-151.12	-151.111	-151.174	-149.479	-152.049	-151.343	-153.092	-156.668	-160.329	-158.671	-160.373	-159.34			41.9	-153.258	-155.781	-156.606	-157.53	-154.1	-153.628	-159.101	-158.129	-154.436	-158.407	-158.941	-157.765	-159.148	-159.14	-162	-158.878	-158.475	-156.602			41.9	-154.209	-155.712	-154.139	-153.386	-154.8	-154.461	-156.29
42	-152.675	-152.984	-151.871	-151.173	-150.886	-153.341	-151.413	-150.185	-150.797	-149.52	-152.213	-152.265	-153.462	-155.977	-160.597	-158.379	-160.461	-159.008			42	-153.221	-156.099	-156.573	-157.561	-153.867	-153.371	-159.309	-157.946	-155.186	-158.362	-159.634	-156.836	-159.144	-159.161	-162.439	-159.272	-158.522	-156.301			42	-153.121	-155.241	-153.733	-153.667	-153.87	-154.929	-155.367
42.1	-151.278	-153.499	-150.527	-150.849	-151.192	-152.03	-151.502	-148.522	-150.379	-150.243	-152.483	-153.337	-153.594	-154.804	-160.596	-158.678	-161.089	-159.82			42.1	-153.243	-156.708	-156.602	-157.219	-154.368	-153.341	-158.905	-157.573	-155.731	-158.412	-160.028	-156.692	-158.872	-158.979	-162.353	-159.521	-158.282	-156.115			42.1	-152.493	-153.835	-153.222	-153.936	-153.554	-155.117	-154.703
42.2	-150.802	-153.845	-149.235	-150.673	-151.139	-151.707	-150.889	-147.816	-150.5	-151.544	-152.633	-153.447	-153.798	-154.002	-160.118	-159.044	-161.624	-160.778			42.2	-153.535	-157.052	-156.784	-156.498	-155.331	-153.16	-158.037	-157.14	-155.813	-158.492	-159.54	-157.46	-158.528	-158.817	-161.934	-159.36	-157.843	-156.28			42.2	-152.979	-152.286	-152.988	-153.318	-153.737	-154.913	-154.563
42.3	-151.333	-153.678	-148.623	-150.89	-150.674	-153.333	-149.968	-148.915	-150.888	-152.04	-152.403	-152.962	-153.965	-153.924	-159.321	-158.841	-161.316	-160.989			42.3	-154.215	-157.084	-157.234	-155.965	-155.938	-152.98	-157.405	-157.191	-155.384	-158.402	-158.573	-158.076	-158.479	-158.667	-161.38	-159.058	-157.603	-156.708			42.3	-153.918	-151.796	-153.204	-152.282	-154.062	-154.612	-154.771
42.4	-152.003	-153.146	-148.409	-151.483	-150.144	-155.253	-149.682	-150.933	-150.707	-151.222	-152.067	-152.926	-153.406	-154.442	-158.398	-158.577	-160.055	-160.762			42.4	-155.116	-157.046	-157.617	-156.121	-155.868	-153.25	-157.171	-157.516	-154.79	-158.145	-157.889	-158.031	-159.061	-158.929	-161.183	-159.217	-157.817	-157.103			42.4	-154.332	-152.782	-153.331	-152.078	-154.142	-154.354	-154.871
42.5	-152.441	-152.845	-148.75	-152.256	-149.734	-155.453	-150.443	-152.407	-149.803	-150.02	-152.12	-153.829	-152.073	-155.22	-157.562	-158.765	-158.666	-160.698			42.5	-155.805	-156.859	-157.607	-156.474	-155.509	-154.318	-156.94	-157.524	-154.445	-157.852	-157.804	-158.038	-160.137	-159.93	-161.314	-159.88	-158.349	-157.35			42.5	-154.209	-154.461	-153.224	-152.769	-153.884	-154.325	-154.723
42.6	-152.451	-153.526	-149.835	-152.491	-149.45	-154.239	-151.83	-152.891	-149.142	-149.317	-152.223	-155.396	-151.002	-155.792	-157.351	-159.001	-158.183	-160.934			42.6	-155.923	-156.53	-157.476	-156.491	-155.282	-155.578	-156.876	-157.233	-154.457	-157.767	-158.086	-158.505	-160.818	-160.952	-161.291	-160.302	-158.745	-157.113			42.6	-154.108	-155.74	-153.52	-153.232	-153.666	-154.433	-154.752
42.7	-151.8	-154.889	-150.782	-151.893	-149.478	-153.28	-153.101	-152.578	-149.337	-149.261	-151.885	-156.441	-151.05	-156.106	-158.019	-159.11	-158.516	-161.297			42.7	-155.639	-156.362	-157.385	-156.593	-155.28	-155.973	-157.499	-156.972	-154.776	-158.008	-158.412	-158.913	-160.278	-160.952	-161.083	-160.113	-158.75	-156.224			42.7	-154.187	-156.249	-154.373	-153.107	-153.568	-154.591	-155.377
42.8	-150.919	-155.37	-150.886	-151.017	-149.709	-153.115	-153.47	-151.57	-149.954	-149.388	-151.623	-156.054	-151.947	-156.262	-159	-159.551	-158.871	-161.414			42.8	-155.449	-156.486	-157.092	-157.119	-155.248	-155.584	-158.368	-156.888	-155.159	-158.295	-158.872	-158.81	-159.098	-160	-160.885	-159.724	-158.684	-155.406			42.8	-154.19	-156.017	-155.348	-153.073	-153.4	-154.993	-156.104
42.9	-150.894	-154.53	-150.464	-150.672	-149.425	-153.104	-152.694	-150.348	-150.513	-149.648	-152.011	-155.014	-152.826	-155.929	-159.617	-160.237	-159.222	-160.808			42.9	-155.305	-156.541	-156.87	-157.657	-154.991	-155.3	-158.511	-156.954	-155.213	-158.276	-159.446	-158.398	-158.468	-158.964	-160.581	-159.347	-158.992	-155.377			42.9	-154.105	-155.091	-156.09	-153.417	-153.272	-155.405	-156.131
43	-152.02	-153.73	-149.91	-151.18	-148.454	-152.841	-151.713	-149.579	-150.973	-150.345	-152.618	-154.702	-153.259	-155.255	-159.974	-160.309	-160.046	-159.549			43	-154.735	-156.16	-157.305	-157.993	-154.556	-155.435	-158.171	-157.03	-154.941	-157.982	-159.801	-157.839	-158.558	-158.246	-160.023	-159.025	-159.524	-155.668			43	-154.179	-154.147	-156.241	-153.836	-153.373	-155.455	-155.657
43.1	-153.233	-153.769	-149.341	-152.079	-147.803	-152.315	-151.512	-149.59	-151.302	-150.93	-152.709	-155.118	-153.336	-155.245	-160.168	-159.403	-161.095	-158.693			43.1	-153.991	-155.562	-158.19	-158.234	-154.164	-155.41	-158.228	-157	-154.905	-157.833	-159.752	-157.244	-158.98	-157.752	-159.313	-159.075	-159.613	-155.506			43.1	-154.203	-153.799	-155.506	-154.171	-153.691	-155.24	-155.396
43.2	-153.274	-154.048	-149.026	-152.679	-148.155	-151.742	-151.64	-150.048	-151.307	-150.964	-152.141	-155.239	-153.328	-156.151	-159.908	-158.426	-161.521	-158.976			43.2	-153.628	-155.211	-158.486	-158.251	-154.092	-154.746	-158.577	-156.8	-155.356	-158.143	-159.411	-157.112	-159.444	-157.444	-158.786	-159.474	-158.974	-155.21			43.2	-153.837	-153.545	-154.343	-154.278	-154.006	-155.182	-155.593
43.3	-151.752	-153.939	-148.83	-152.825	-148.995	-151.665	-151.372	-150.235	-150.802	-151.048	-151.385	-155.058	-153.18	-156.978	-159.521	-158.087	-161.171	-159.75			43.3	-153.334	-155.331	-157.511	-158.066	-154.314	-154.066	-158.434	-156.477	-155.983	-158.672	-159.094	-157.589	-159.767	-157.401	-158.931	-159.682	-157.977	-155.304			43.3	-153.313	-153.036	-153.731	-153.976	-154.341	-155.477	-156.118
43.4	-149.651	-153.493	-148.394	-152.506	-149.637	-152.276	-151.067	-150.124	-150.383	-151.282	-151.23	-155.04	-152.731	-157.082	-159.635	-158.008	-160.768	-160.141			43.4	-152.867	-155.935	-156.007	-157.693	-154.504	-154.113	-157.599	-156.222	-156.26	-158.777	-159.057	-158.243	-159.992	-157.802	-159.734	-159.465	-157.011	-155.518			43.4	-152.914	-152.937	-153.843	-153.447	-154.72	-155.75	-156.726
43.5	-148.233	-153.234	-148.059	-151.684	-149.872	-153.022	-151.14	-149.903	-150.758	-150.98	-151.764	-154.728	-152.238	-156.878	-160.037	-157.984	-160.916	-160.27			43.5	-152.532	-156.585	-155.263	-157.091	-154.633	-154.439	-156.817	-156.192	-155.589	-158.288	-159.113	-158.596	-160.035	-158.533	-160.401	-159.287	-156.311	-155.647			43.5	-152.783	-153.488	-154.036	-153.125	-154.736	-155.488	-157.206
43.6	-148.005	-153.495	-148.203	-150.75	-149.861	-153.497	-151.459	-149.538	-151.08	-150.334	-152.057	-154.011	-152.173	-157.009	-160.168	-158.046	-161.567	-160.336			43.6	-152.318	-156.585	-155.442	-156.715	-155.123	-154.344	-156.833	-156.52	-154.21	-158.077	-159.239	-158.417	-159.698	-159.026	-160.523	-159.643	-156.173	-155.965			43.6	-153.29	-153.988	-153.912	-153.168	-154.419	-154.622	-157.396
43.7	-149.051	-153.991	-148.447	-150.238	-150.102	-153.804	-151.68	-149.438	-150.479	-150.259	-151.86	-153.793	-152.538	-157.398	-160.161	-158.291	-162.161	-160.076			43.7	-152.266	-155.873	-155.813	-156.749	-156.193	-154.079	-157.367	-157.191	-153.355	-158.578	-159.634	-158.092	-159.257	-159.183	-160.607	-160.274	-156.61	-156.485			43.7	-154.583	-153.985	-153.677	-153.235	-154.521	-153.747	-157.103
43.8	-150.641	-154.416	-148.277	-150.234	-150.512	-153.985	-151.335	-149.819	-149.909	-150.421	-152.14	-154.425	-152.807	-157.552	-160.323	-158.807	-162.142	-159.61			43.8	-152.45	-155.301	-156.08	-156.647	-157.309	-154.053	-157.577	-157.802	-153.558	-158.846	-159.844	-158.126	-159.214	-159.374	-160.972	-160.64	-157.258	-156.864			43.8	-155.925	-153.925	-153.675	-152.94	-155.005	-153.687	-156.316
43.9	-151.629	-154.666	-147.604	-150.588	-150.478	-153.933	-150.412	-150.412	-150.253	-149.981	-152.973	-155.026	-152.873	-157.325	-160.347	-158.954	-161.352	-159.277			43.9	-152.521	-155.764	-156.562	-156.38	-157.548	-153.997	-157.113	-157.885	-154.102	-158.295	-159.425	-158.302	-159.222	-159.61	-161.383	-160.619	-157.868	-157.147			43.9	-156.248	-154.511	-153.986	-152.502	-154.889	-154.589	-155.49
44	-151.835	-154.755	-146.876	-150.967	-150.058	-153.654	-149.503	-151.024	-150.81	-149.327	-153.22	-154.639	-153.087	-157.041	-159.818	-158.547	-160.043	-158.875			44	-152.41	-156.985	-157.437	-156.723	-156.658	-153.766	-156.506	-157.385	-154.151	-157.647	-158.8	-158.192	-158.608	-159.668	-161.87	-160.213	-158.38	-157.531			44	-155.439	-155.524	-154.393	-152.516	-153.785	-155.513	-155.215
44.1	-152.162	-154.506	-146.787	-151.063	-149.555	-153.21	-149.144	-151.318	-150.919	-149.05	-152.775	-153.786	-153.379	-156.984	-159.015	-158.805	-158.805	-158.197			44.1	-152.503	-157.761	-158.303	-157.705	-155.383	-153.634	-156.361	-156.88	-153.781	-157.575	-158.462	-157.962	-157.902	-159.461	-162.42	-159.408	-158.6	-157.902			44.1	-154.463	-156.003	-154.761	-153.03	-152.577	-155.584	-155.384
44.2	-153.175	-153.635	-147.458	-151.032	-149.168	-152.88	-149.33	-151.062	-150.916	-148.845	-152.553	-153.904	-153.409	-157.137	-158.511	-160.099	-158.359	-157.846			44.2	-153.053	-157.617	-158.545	-158.451	-154.717	-153.606	-156.569	-156.975	-153.654	-157.763	-158.409	-158.076	-157.857	-159.182	-162.537	-158.515	-158.291	-158.219			44.2	-154.194	-155.319	-155.027	-153.595	-152.664	-155.012	-155.441
44.3	-153.785	-152.447	-148.311	-151.063	-149.562	-153.28	-149.883	-150.647	-151.12	-148.404	-152.479	-155.183	-153.266	-157.45	-158.62	-161.086	-158.63	-158.238			44.3	-153.974	-157.069	-157.935	-158.65	-154.861	-153.543	-156.752	-157.453	-153.881	-157.615	-158.587	-158.327	-158.152	-158.964	-161.96	-157.891	-157.723	-158.661			44.3	-154.543	-153.689	-154.862	-153.919	-153.934	-154.414	-155.448
44.4	-153.219	-151.969	-148.816	-151.139	-150.896	-154.258	-150.762	-150.651	-151.319	-147.995	-151.884	-156.557	-153.441	-157.702	-158.993	-161.051	-158.915	-159.035			44.4	-154.63	-156.297	-156.836	-158.728	-155.159	-153.717	-156.762	-157.726	-154.208	-157.098	-158.951	-158.358	-158.259	-158.688	-161.026	-157.892	-157.518	-159.08			44.4	-154.737	-152.411	-154.522	-153.763	-154.668	-154.233	-156.108
44.5	-152.664	-152.591	-149.174	-151.355	-152.364	-154.539	-151.474	-151.12	-151.193	-147.926	-151.038	-156.963	-153.945	-157.81	-159.208	-160.409	-159.045	-159.943			44.5	-154.41	-155.354	-156.065	-158.844	-155.115	-154.401	-156.594	-157.639	-154.515	-156.595	-159.122	-158.513	-158.245	-158.271	-160.15	-158.706	-157.559	-159.006			44.5	-154.545	-152.751	-154.664	-153.088	-154.236	-154.499	-157.348
44.6	-152.892	-153.386	-149.905	-151.706	-153.351	-153.626	-151.264	-151.568	-150.916	-148.472	-150.851	-156.265	-153.985	-158.446	-159.562	-159.559	-159.32	-160.619			44.6	-153.869	-154.857	-156.315	-158.782	-154.946	-155.116	-156.467	-157.299	-154.755	-156.352	-158.903	-158.94	-158.652	-157.785	-159.604	-159.695	-157.35	-158.336			44.6	-154.251	-154.188	-154.969	-152.624	-153.702	-154.829	-158.016
44.7	-153.093	-153.656	-150.996	-152.166	-153.583	-152.242	-150.289	-151.716	-150.866	-149.509	-151.547	-155.329	-153.398	-159.738	-160.182	-159.015	-159.563	-160.509			44.7	-153.994	-155.139	-157.202	-158.379	-154.941	-155.343	-156.879	-156.821	-155.014	-156.439	-158.673	-159.231	-159.616	-157.588	-159.465	-159.967	-157.147	-157.516			44.7	-153.913	-154.975	-154.784	-152.915	-153.632	-155.063	-157.55
44.8	-152.719	-153.633	-152.171	-152.79	-152.689	-151.394	-149.309	-151.581	-150.894	-150.077	-152.176	-154.762	-152.847	-160.357	-160.435	-159.122	-159.36	-159.79			44.8	-154.735	-155.764	-157.687	-157.839	-155.14	-155.18	-157.704	-156.396	-155.201	-156.916	-158.607	-159.231	-160.143	-157.947	-159.785	-159.398	-157.294	-157.271			44.8	-153.463	-154.581	-154.323	-153.587	-153.677	-155.412	-156.788
44.9	-151.975	-153.571	-153.044	-153.159	-150.793	-151.67	-149.163	-151.274	-150.544	-149.82	-152.143	-154.744	-152.522	-159.434	-159.812	-159.299	-159.274	-159.626			44.9	-155.416	-156.031	-157.413	-157.577	-155.498	-154.653	-158.227	-156.129	-155.224	-157.565	-158.527	-158.927	-159.359	-158.559	-160.581	-158.628	-157.496	-157.663			44.9	-152.929	-153.96	-154.242	-154.071	-153.789	-155.859	-156.538
45	-151.171	-153.718	-153.097	-152.626	-148.832	-152.547	-150.33	-151.009	-149.908	-149.449	-152.171	-155.174	-152.186	-157.807	-159.077	-158.916	-160.103	-160.307			45	-155.716	-155.704	-156.73	-157.658	-155.873	-153.876	-158.422	-156.001	-155.351	-157.902	-158.494	-158.399	-157.983	-158.911	-161.528	-158.337	-157.683	-157.892			45	-152.612	-153.863	-154.672	-154.278	-153.893	-156.087	-156.372
45.1	-150.587	-154.245	-152.287	-151.458	-147.588	-153.271	-151.8	-150.775	-149.811	-149.386	-152.623	-155.332	-151.849	-157.05	-159.214	-158.121	-161.104	-160.618			45.1	-155.698	-155.294	-156.118	-157.856	-156.065	-153.468	-158.619	-156.005	-155.632	-157.932	-158.567	-158.093	-157.26	-158.855	-161.935	-158.642	-158.142	-157.57			45.1	-152.832	-154.386	-155.184	-154.552	-153.568	-155.991	-155.754
45.2	-150.377	-154.49	-151.238	-150.501	-147.159	-154.079	-151.925	-150.526	-150.905	-149.754	-152.843	-154.868	-151.708	-157.68	-159.826	-157.271	-161.126	-159.825			45.2	-155.486	-155.259	-156.002	-158.142	-155.95	-153.604	-158.56	-156.095	-155.831	-158.184	-158.491	-158.159	-157.474	-158.704	-161.417	-158.934	-158.79	-156.98			45.2	-153.176	-154.887	-155.474	-154.889	-153.046	-155.829	-155.202
45.3	-150.501	-153.684	-150.494	-150.158	-147.468	-154.965	-150.899	-150.43	-152.289	-150.561	-152.705	-154.238	-151.745	-158.571	-160.153	-156.802	-160.485	-158.683			45.3	-155.051	-155.355	-156.383	-158.506	-155.631	-153.89	-158.12	-156.299	-155.823	-158.694	-158.18	-158.188	-158.057	-158.716	-160.627	-158.796	-159.286	-156.395			45.3	-153.176	-154.75	-155.603	-154.723	-153.249	-155.698	-155.393
45.4	-150.775	-152.604	-150.148	-150.281	-148.546	-155.012	-150.501	-150.564	-152.577	-151.095	-152.862	-153.849	-151.69	-158.615	-159.974	-157.337	-160.244	-158.29			45.4	-154.772	-155.194	-156.71	-158.602	-155.377	-154.175	-157.741	-156.58	-155.549	-158.79	-158.043	-157.95	-158.322	-158.813	-160.476	-158.568	-159.389	-155.91			45.4	-153.039	-154.589	-155.633	-153.908	-154.229	-155.307	-156.183
45.5	-151.104	-152.793	-150.202	-150.652	-150.051	-154.223	-151.442	-150.868	-151.978	-150.879	-153.252	-153.631	-151.741	-158.037	-159.315	-158.605	-160.693	-159.153			45.5	-155.186	-155.023	-156.829	-158.351	-155.449	-154.549	-157.368	-156.55	-155.233	-158.392	-158.43	-157.9	-158.072	-158.73	-160.917	-158.509	-158.991	-155.518			45.5	-152.877	-155.162	-155.442	-153.199	-154.927	-154.556	-156.959
45.6	-151.573	-154.081	-150.475	-151.295	-151.188	-153.519	-152.545	-151.224	-151.774	-150.516	-153.498	-153.319	-152.184	-157.56	-158.554	-159.357	-160.981	-160.712			45.6	-156.153	-155.348	-157.012	-158.283	-155.859	-154.839	-156.603	-156.123	-155.214	-158.167	-158.88	-158.26	-157.762	-158.323	-161.386	-158.422	-158.327	-155.363			45.6	-152.633	-156.012	-155.194	-153.115	-154.904	-153.851	-157.09
45.7	-152.175	-154.936	-150.529	-151.943	-151.36	-153.14	-152.463	-151.123	-152.194	-150.569	-153.82	-153.103	-152.27	-157.329	-158.217	-159.081	-160.442	-161.784			45.7	-157.002	-156.259	-156.838	-158.441	-156.295	-154.809	-155.927	-155.871	-155.328	-158.117	-158.753	-158.508	-157.666	-157.768	-161.674	-158.263	-157.758	-155.5			45.7	-152.781	-156.354	-155.107	-153.27	-154.813	-153.777	-156.385
45.8	-152.643	-154.635	-150.132	-152.151	-150.902	-152.731	-151.349	-150.356	-152.325	-150.55	-154.222	-153.358	-151.526	-157.066	-158.503	-158.489	-159.748	-161.931			45.8	-157.09	-157.066	-156.114	-158.264	-156.295	-154.756	-156.129	-155.918	-155.201	-157.985	-158.361	-158.34	-157.608	-157.611	-161.858	-158.338	-157.369	-155.746			45.8	-153.571	-156.135	-154.935	-153.308	-154.817	-154.401	-155.588
45.9	-152.485	-153.639	-149.804	-152.106	-150.668	-152.413	-150.503	-149.868	-151.897	-150.056	-154.115	-153.906	-150.962	-156.728	-159.38	-158.421	-159.815	-161.509			45.9	-156.43	-156.975	-155.88	-157.893	-155.594	-155.061	-156.913	-155.824	-154.774	-158.03	-158.382	-158.089	-157.601	-158.026	-161.915	-158.585	-157.047	-156.126			45.9	-154.238	-155.568	-154.618	-153.38	-154.478	-154.988	-155.323
46	-151.699	-152.506	-150.102	-152.25	-150.756	-152.457	-150.565	-150.221	-151.372	-149.794	-153.066	-154.198	-151.357	-156.287	-160.411	-158.975	-160.136	-160.976			46	-155.844	-156.31	-156.681	-157.942	-154.724	-155.59	-157.414	-155.56	-154.369	-158.142	-158.542	-157.972	-157.761	-158.436	-161.911	-158.801	-156.786	-156.708			46	-154.111	-154.778	-154.455	-153.53	-154.15	-154.981	-155.086
46.1	-150.805	-151.651	-150.793	-152.301	-150.648	-152.49	-151.088	-150.486	-150.953	-150.038	-151.998	-154.151	-151.828	-155.729	-160.734	-159.508	-159.757	-160.6			46.1	-155.77	-155.812	-157.761	-158.348	-154.396	-156.017	-157.624	-155.393	-154.345	-157.811	-158.249	-157.932	-157.981	-158.71	-162.042	-159.198	-156.764	-157.178			46.1	-153.594	-154.142	-154.433	-153.43	-154.37	-154.789	-154.424
46.2	-150.035	-151.666	-151.158	-151.867	-150.244	-152.387	-151.62	-150.201	-150.555	-150.264	-152.314	-153.918	-151.586	-155.741	-160.142	-159.484	-159.263	-160.385			46.2	-155.807	-155.457	-158.347	-158.633	-154.538	-156.054	-158.016	-155.455	-154.496	-157.21	-157.906	-157.996	-158.1	-159.264	-162.105	-159.647	-157.191	-157.338			46.2	-153.375	-154.043	-154.296	-153.041	-154.696	-154.909	-153.758
46.3	-149.665	-152.572	-151.032	-151.448	-149.751	-152.738	-152.007	-150.251	-150.244	-150.374	-153.362	-153.433	-151.244	-156.727	-159.485	-158.986	-159.585	-160.251			46.3	-155.899	-155.024	-158.278	-158.529	-154.927	-155.797	-158.637	-155.815	-154.472	-157.205	-158.208	-158.072	-158.167	-159.867	-161.733	-159.621	-158.036	-157.305			46.3	-153.363	-154.138	-154.208	-152.847	-154.54	-155.103	-153.841
46.4	-150.356	-153.432	-151.181	-151.605	-149.443	-153.411	-152.126	-150.983	-150.082	-150.245	-153.424	-153.14	-151.612	-157.81	-159.399	-158.529	-160.22	-159.982			46.4	-156.055	-154.756	-157.861	-157.941	-155.362	-155.727	-159.17	-156.292	-154.616	-157.951	-158.664	-158.023	-158.396	-159.934	-161.072	-159.209	-158.804	-156.994			46.4	-153.268	-154.039	-154.422	-153.25	-154.139	-155.055	-154.795
46.5	-151.8	-153.553	-151.702	-151.732	-149.491	-153.423	-152.001	-151.557	-150.06	-149.666	-152.447	-153.224	-152.527	-158.027	-159.695	-158.629	-160.338	-159.658			46.5	-155.79	-155.08	-157.568	-156.991	-155.396	-156.004	-159.222	-156.639	-155.368	-158.682	-158.416	-157.91	-158.719	-159.469	-160.729	-158.789	-158.985	-156.416			46.5	-153.196	-153.784	-154.486	-154.061	-154.205	-155.189	-155.583
46.6	-152.615	-152.922	-151.863	-151	-149.978	-152.567	-151.588	-151.243	-150.365	-149.294	-151.478	-153.148	-153.086	-157.497	-160.004	-159.031	-160.146	-159.939			46.6	-155.198	-155.903	-157.58	-156.154	-154.967	-156.3	-158.783	-156.775	-156.248	-158.836	-157.689	-158.005	-158.706	-158.907	-160.943	-158.306	-158.682	-156.04			46.6	-153.157	-153.288	-154.17	-154.409	-154.921	-156.033	-155.326
46.7	-152.199	-151.799	-151.537	-149.756	-150.75	-151.767	-150.894	-150.28	-151.096	-149.407	-151.186	-152.994	-152.873	-156.928	-160.391	-159.223	-160.248	-160.848			46.7	-154.973	-156.493	-157.767	-155.852	-154.363	-156.18	-158.291	-156.717	-156.547	-158.644	-157.384	-158.547	-158.327	-158.425	-161.295	-157.847	-157.998	-156.142			46.7	-153.173	-152.814	-153.821	-153.615	-155.541	-157.035	-154.371
46.8	-151.499	-151.142	-150.922	-149.345	-151.286	-151.711	-150.434	-149.576	-151.57	-149.408	-151.78	-153.309	-152.327	-156.88	-160.862	-159.404	-160.801	-161.606			46.8	-155.328	-156.307	-157.675	-156.184	-153.704	-155.699	-158.066	-156.617	-156.318	-158.522	-157.697	-159.269	-157.98	-158.282	-161.295	-157.732	-157.085	-156.652			46.8	-153.698	-152.902	-153.449	-152.247	-155.436	-157.217	-153.647
46.9	-151.711	-151.762	-150.008	-150.409	-151.342	-152.197	-150.608	-149.688	-151.189	-149.422	-152.89	-154.009	-151.845	-157.356	-160.864	-159.661	-161.47	-161.973			46.9	-155.727	-155.597	-157.001	-156.831	-153.178	-155.635	-157.947	-156.598	-156.047	-158.486	-157.999	-159.63	-157.59	-158.712	-160.991	-157.824	-156.62	-157.4			46.9	-154.712	-153.37	-152.987	-151.626	-154.853	-156.552	-154.038
47	-152.731	-152.759	-149.242	-151.784	-151.476	-152.565	-151.042	-150.039	-150.72	-149.829	-153.562	-154.289	-151.309	-157.74	-160.158	-159.639	-161.467	-162.212			47	-155.667	-154.99	-156.312	-157.262	-153.113	-156.217	-157.614	-156.65	-155.931	-158.452	-157.983	-159.265	-156.923	-159.304	-160.808	-157.815	-157.163	-157.976			47	-155.136	-153.847	-152.703	-152.138	-154.406	-155.54	-155.402
47.1	-153.366	-152.857	-149.381	-152.136	-152.181	-152.4	-150.924	-149.807	-150.787	-150.082	-153.198	-154	-150.627	-157.515	-159.46	-159.486	-160.518	-162.082			47.1	-155.513	-155.225	-156.264	-157.295	-153.565	-156.637	-157.227	-156.784	-155.752	-158.556	-157.797	-158.291	-156.444	-159.597	-160.942	-157.928	-158.334	-157.904			47.1	-154.259	-154.398	-152.779	-153.062	-154.245	-154.492	-156.367
47.2	-153.183	-152.479	-150.211	-151.667	-153.059	-152.227	-149.975	-149.32	-150.848	-150.061	-152.47	-154.168	-150.286	-157.226	-159.782	-159.24	-159.482	-161.267			47.2	-155.861	-156.406	-156.601	-157.165	-154.309	-156.611	-157.274	-156.9	-155.561	-158.797	-157.583	-157.598	-156.611	-159.417	-161.062	-158.339	-159.005	-157.129			47.2	-152.86	-154.617	-152.966	-153.781	-153.977	-153.754	-156.305
47.3	-152.963	-152.714	-150.789	-151.391	-153.668	-152.596	-149.151	-149.14	-150.572	-150.443	-152.46	-155.239	-150.766	-157.669	-160.731	-158.713	-158.977	-160.314			47.3	-156.722	-157.249	-156.949	-156.851	-155.039	-156.588	-157.952	-156.637	-155.748	-158.717	-157.399	-157.926	-157.26	-158.794	-160.847	-158.675	-158.855	-156.232			47.3	-152.173	-154.22	-153.146	-154.081	-153.476	-153.848	-155.763
47.4	-153.035	-153.447	-150.808	-151.4	-153.78	-152.773	-149.456	-149.296	-150.288	-150.889	-153.051	-156.51	-151.677	-158.204	-161.008	-158.531	-158.895	-159.983			47.4	-157.512	-156.87	-157.33	-156.277	-155.56	-156.708	-158.749	-155.977	-156.369	-158.12	-157.294	-158.616	-158.09	-158.045	-160.429	-158.782	-158.647	-155.786			47.4	-152.478	-153.81	-153.444	-153.821	-153.127	-154.667	-155.108
47.5	-152.688	-153.556	-150.446	-151.245	-152.929	-152.176	-150.186	-149.891	-150.232	-150.327	-153.595	-157.41	-152.233	-158.012	-160.686	-159.312	-159.329	-160.155			47.5	-157.691	-156.178	-157.814	-156.006	-155.872	-156.666	-158.812	-155.569	-157.066	-157.804	-157.452	-158.716	-158.837	-157.553	-160.159	-158.797	-158.631	-155.81			47.5	-153.224	-153.834	-153.903	-153.085	-153.23	-155.277	-154.501
47.6	-151.875	-152.728	-150.003	-151.338	-151.381	-151.623	-150.142	-150.833	-150.385	-148.974	-153.906	-157.872	-151.883	-157.653	-160.732	-160.256	-160.109	-160.267			47.6	-157.336	-155.998	-158.558	-156.367	-155.983	-156.323	-158.453	-155.798	-157.375	-158.238	-157.868	-158.399	-159.138	-157.447	-160.28	-158.628	-158.465	-156.279			47.6	-153.776	-154.22	-154.456	-152.528	-153.549	-155.369	-154.135
47.7	-151.742	-151.824	-149.938	-151.763	-150.16	-152.042	-149.728	-151.498	-150.947	-148.149	-153.972	-157.736	-150.864	-157.52	-161.086	-160.207	-160.581	-160.054			47.7	-156.762	-155.954	-159.25	-156.936	-155.674	-156.005	-158.433	-156.123	-156.985	-158.563	-158.155	-158.247	-158.967	-157.36	-160.671	-158.178	-158.229	-157.088			47.7	-153.911	-154.764	-155.044	-152.855	-153.853	-155.255	-154.028
47.8	-152.46	-151.489	-150.367	-151.607	-149.519	-153.322	-150.146	-151.566	-151.913	-148.539	-153.829	-156.756	-150.176	-157.252	-160.829	-159.148	-160.632	-159.687			47.8	-156.327	-155.702	-159.183	-157.672	-154.958	-155.858	-158.515	-156.007	-156.243	-158.102	-158.318	-158.468	-158.761	-156.997	-161.098	-157.607	-158.143	-157.682			47.8	-153.807	-155.095	-155.525	-153.762	-154.257	-154.779	-154.445
47.9	-152.735	-151.806	-150.964	-151.046	-148.992	-154.574	-151.262	-151.207	-152.708	-149.518	-153.296	-155.345	-150.288	-157.035	-160.072	-157.749	-160.525	-159.482			47.9	-156.28	-155.555	-158.428	-158.602	-154.499	-155.533	-158.464	-155.854	-155.735	-157.348	-158.603	-158.938	-158.576	-156.861	-161.434	-157.41	-158.113	-157.836			47.9	-153.631	-154.892	-155.544	-154.143	-154.569	-154.019	-155.388
48	-152.061	-152.492	-151.416	-151.189	-148.788	-154.954	-151.83	-150.763	-152.947	-149.952	-152.288	-154.317	-150.603	-157.035	-159.936	-156.699	-160.376	-159.664			48	-156.41	-155.879	-157.46	-158.98	-154.597	-154.948	-158.417	-156.271	-155.533	-156.99	-158.863	-159.321	-158.06	-157.493	-161.58	-157.961	-157.926	-158.018			48	-153.596	-154.041	-154.923	-153.611	-154.42	-153.478	-155.987
48.1	-151.338	-152.981	-151.68	-152.122	-149.591	-154.408	-151.453	-150.837	-152.656	-149.567	-151.566	-153.955	-150.832	-156.941	-160.518	-156.678	-160.516	-160.425			48.1	-156.397	-156.545	-156.478	-158.506	-154.91	-154.656	-158.326	-156.962	-155.583	-157.162	-158.901	-159.365	-157.137	-158.541	-161.554	-158.759	-157.577	-158.363			48.1	-154.027	-152.9	-154.07	-152.79	-154.165	-153.308	-155.765
48.2	-151.253	-153.219	-152.043	-153.076	-151.083	-153.668	-150.854	-151.608	-151.94	-149.107	-151.754	-153.867	-151.168	-156.692	-160.672	-157.637	-160.979	-161.511			48.2	-156.352	-156.911	-155.887	-158.081	-155.378	-155.089	-158.372	-157.039	-155.92	-157.675	-158.822	-159.168	-156.484	-159.241	-161.57	-159.137	-157.378	-158.363			48.2	-154.762	-152.493	-153.554	-152.319	-154.176	-153.42	-155.599
48.3	-151.704	-153.763	-152.511	-153.521	-152.018	-153.172	-150.642	-152.07	-151.124	-149.275	-152.225	-153.701	-151.563	-156.66	-159.588	-158.537	-161.253	-162.046			48.3	-156.484	-156.492	-155.972	-158.181	-155.709	-155.842	-158.588	-156.291	-156.286	-158.38	-158.544	-158.804	-156.881	-159.341	-161.886	-159.132	-157.501	-157.739			48.3	-155.215	-153.414	-153.553	-152.213	-154.166	-153.81	-156.081
48.4	-152.519	-154.657	-152.4	-153.313	-151.865	-153.125	-150.617	-151.46	-150.911	-149.808	-151.981	-153.728	-152.323	-157.332	-158.276	-158.62	-161.199	-161.505			48.4	-156.5	-155.658	-156.429	-158.398	-155.197	-156.292	-158.53	-155.506	-156.286	-159.13	-157.856	-158.323	-158.008	-159.135	-162.356	-158.883	-157.867	-156.879			48.4	-155.182	-154.784	-153.736	-152.171	-153.91	-154.42	-156.436
48.5	-153.329	-154.913	-151.449	-152.67	-151.047	-153.588	-150.322	-150.407	-151.688	-149.925	-151.249	-153.912	-153.522	-158.546	-158.535	-158.255	-161.185	-160.157			48.5	-156.001	-155.301	-156.916	-158.365	-154.282	-156.646	-158.211	-155.367	-155.749	-159.478	-157.238	-158.161	-158.896	-158.83	-162.496	-158.634	-158.201	-156.458			48.5	-154.803	-155.139	-153.622	-152.163	-153.616	-155.067	-155.888
48.6	-153.456	-153.835	-150.807	-152.25	-150.054	-153.912	-150.088	-150.001	-152.748	-149.421	-150.763	-153.644	-154.157	-159.423	-159.913	-158.322	-161.281	-158.84			48.6	-155.231	-155.692	-157.356	-157.839	-154.081	-157.386	-158.012	-155.634	-154.852	-159.069	-157.345	-158.431	-159.258	-158.641	-162.148	-158.944	-158.249	-156.701			48.6	-154.229	-154.41	-153.267	-152.369	-153.584	-155.566	-154.598
48.7	-152.828	-152.361	-151.602	-152.366	-149.422	-153.564	-150.354	-150.373	-153.107	-148.897	-150.562	-153.351	-153.962	-159.245	-160.479	-159.048	-161.282	-158.486			48.7	-154.813	-156.159	-157.792	-156.915	-154.485	-158.19	-158.007	-155.627	-154.052	-158.471	-158.053	-158.683	-159.287	-158.827	-161.659	-159.677	-158.273	-157.122			48.7	-153.633	-153.913	-153.379	-152.771	-153.675	-155.717	-153.5
48.8	-152.034	-151.835	-153.157	-152.447	-149.727	-153.041	-150.582	-150.639	-152.768	-148.965	-150.624	-153.943	-153.821	-158.314	-160.048	-159.83	-161.206	-158.951			48.8	-154.824	-156.03	-158.043	-156.206	-154.802	-158.415	-158.112	-155.175	-153.946	-158.267	-158.552	-158.939	-159.143	-159.385	-161.392	-159.897	-158.574	-157.245			48.8	-153.214	-154.245	-154.306	-152.914	-153.348	-155.496	-153.624
48.9	-151.587	-152.2	-154.004	-152.046	-150.949	-152.97	-150.535	-150.449	-152.133	-149.407	-151.116	-155.127	-153.836	-157.867	-159.807	-160.047	-161	-159.224			48.9	-154.893	-155.608	-157.553	-156.214	-155.148	-158.067	-158.085	-154.76	-154.512	-158.104	-158.312	-159.343	-159.149	-160.134	-161.385	-159.44	-159.044	-157.176			48.9	-153.159	-154.685	-155.371	-152.373	-152.738	-155.101	-154.846
49	-151.712	-152.892	-153.902	-151.524	-152.319	-153.085	-150.838	-150.275	-151.177	-149.469	-151.632	-155.956	-153.45	-158.363	-160.194	-159.546	-160.517	-159.417			49	-154.86	-155.509	-156.452	-156.669	-155.66	-157.586	-157.727	-154.672	-155.118	-157.8	-157.755	-159.52	-159.117	-160.703	-161.61	-159.182	-159.396	-157.114			49	-153.435	-154.608	-155.562	-151.515	-152.728	-154.673	-156.098
49.1	-151.88	-153.732	-153.537	-151.17	-152.788	-152.755	-151.63	-150.665	-150.396	-149.057	-151.56	-155.904	-152.683	-158.816	-160.957	-158.716	-159.816	-160.524			49.1	-154.757	-155.682	-155.882	-156.943	-155.802	-157.023	-157.423	-154.834	-155.362	-157.8	-157.462	-159.308	-158.628	-160.701	-162.018	-159.35	-159.117	-156.946			49.1	-153.931	-154.198	-154.873	-151.071	-153.433	-154.469	-156.459
49.2	-151.618	-154.124	-153.004	-150.963	-152.117	-152.149	-152.434	-151.584	-150.591	-148.714	-151.332	-155.192	-152.112	-158.452	-161.725	-158.345	-159.107	-161.869			49.2	-154.625	-155.891	-156.438	-156.929	-155.335	-156.341	-157.705	-155.218	-155.18	-158.357	-157.565	-159.138	-157.977	-160.362	-162.237	-159.171	-158.147	-156.675			49.2	-154.446	-153.871	-154.39	-151.243	-154.128	-154.728	-155.604
49.3	-151.537	-153.801	-151.929	-151.147	-151.279	-152.058	-152.445	-151.942	-151.497	-148.647	-151.709	-154.713	-152.051	-157.636	-162.142	-158.756	-158.806	-162.102			49.3	-154.537	-156.179	-157.375	-156.846	-154.741	-155.868	-158.476	-155.56	-154.806	-159.021	-157.95	-159.18	-157.755	-160.222	-162.064	-158.477	-157.142	-156.583			49.3	-154.55	-153.853	-154.472	-151.695	-154.622	-155.215	-154.411
49.4	-152.146	-153.455	-150.83	-151.788	-151.186	-152.728	-151.184	-151.077	-152.155	-148.791	-152.544	-154.883	-152.104	-157.025	-161.776	-159.312	-159.119	-161.655			49.4	-154.511	-156.513	-157.672	-156.761	-154.526	-155.864	-158.936	-155.852	-154.582	-159.083	-158.379	-159.128	-158.106	-160.22	-161.692	-157.93	-156.77	-156.641			49.4	-154.096	-154.302	-154.542	-151.904	-155.169	-155.477	-154.235
49.5	-153.035	-153.399	-150.69	-152.229	-151.731	-153.462	-149.828	-149.851	-152.093	-149.277	-153.345	-155.322	-151.62	-156.697	-160.178	-159.462	-159.715	-161.307			49.5	-154.842	-156.674	-157.106	-156.923	-154.712	-156.12	-158.442	-156.662	-154.631	-158.607	-158.484	-158.88	-158.543	-159.984	-161.256	-157.862	-157.032	-156.663			49.5	-153.434	-154.849	-154.588	-151.876	-155.602	-155.449	-155.369
49.6	-153.542	-153.435	-151.427	-152.1	-152.091	-153.632	-149.743	-149.11	-151.809	-150.006	-153.554	-155.9	-150.921	-156.26	-157.929	-159.045	-160.359	-160.796			49.6	-155.886	-156.421	-156.53	-157.207	-154.827	-156.095	-157.299	-157.765	-154.833	-158.347	-158.045	-158.55	-158.575	-159.316	-161.065	-158.147	-157.318	-156.906			49.6	-153.007	-154.886	-154.644	-152.28	-155.845	-155.19	-156.967
49.7	-153.515	-153.671	-152.074	-152.106	-151.91	-153.483	-150.328	-148.686	-151.878	-150.591	-153.059	-156.463	-150.733	-155.864	-156.813	-157.952	-160.98	-160.128			49.7	-157.057	-155.773	-156.82	-157.025	-154.621	-155.829	-156.516	-158.205	-155.016	-158.612	-157.267	-158.352	-158.124	-158.253	-161.419	-158.603	-157.534	-157.533			49.7	-152.941	-154.656	-154.482	-153.231	-156.173	-154.659	-157.71
49.8	-153.146	-153.637	-151.933	-152.665	-152.134	-153.546	-150.609	-148.582	-152.003	-150.836	-152.638	-156.499	-150.984	-156.322	-157.668	-157.069	-161.202	-160.253			49.8	-157.093	-155.141	-157.545	-156.432	-154.729	-155.911	-156.634	-157.993	-155.201	-158.99	-156.675	-158.361	-157.413	-157.354	-161.961	-158.996	-158.013	-158.113			49.8	-153.017	-154.509	-154.474	-154.03	-156.53	-154.321	-157.085
49.9	-152.372	-152.589	-150.929	-153.204	-152.968	-153.626	-150.982	-149.33	-151.906	-150.856	-152.601	-156.014	-151.267	-157.552	-159.195	-157.534	-160.91	-161.35			49.9	-155.647	-154.882	-157.799	-156.053	-155.62	-156.018	-157.109	-157.688	-155.384	-159.088	-156.746	-158.437	-156.889	-157.478	-162.111	-159.146	-158.571	-158.172			49.9	-153.127	-154.192	-154.749	-154.464	-156.489	-154.659	-155.885
50	-151.401	-151.346	-149.712	-153.254	-152.753	-153.416	-151.618	-150.529	-151.953	-150.772	-152.39	-155.492	-151.593	-158.545	-160.242	-158.533	-160.608	-162.157			50	-153.81	-154.886	-157.632	-155.937	-156.363	-155.701	-157.527	-157.399	-155.542	-158.939	-157.579	-158.713	-156.748	-158.698	-161.875	-159.137	-158.805	-157.714			50	-153.169	-153.923	-154.854	-154.524	-155.979	-155.409	-154.927
50.1	-150.913	-151.385	-149.384	-152.71	-151.088	-153.205	-151.927	-151.172	-152.017	-150.817	-151.829	-155.112	-152.438	-158.643	-160.8	-158.459	-160.653	-162.083			50.1	-152.75	-154.824	-157.657	-156.068	-156.014	-155.667	-158.111	-156.91	-155.901	-158.76	-158.534	-159.21	-157.029	-159.874	-161.599	-158.959	-158.607	-157.224			50.1	-152.747	-154.3	-154.926	-153.548	-155.426	-156.013	-154.605
50.2	-150.816	-152.412	-149.975	-151.877	-150.015	-153.412	-151.748	-150.885	-151.794	-151.048	-151.364	-155.166	-153.752	-157.993	-160.873	-157.463	-160.689	-161.761			50.2	-152.624	-154.729	-158.012	-156.82	-155.03	-156.344	-158.888	-156.012	-156.514	-158.769	-158.771	-159.665	-157.633	-160.062	-161.372	-158.635	-158.312	-157.271			50.2	-152.079	-155.006	-155.132	-151.693	-155.264	-156.154	-154.933
50.3	-150.723	-152.952	-150.355	-151.593	-150.633	-154.094	-151.163	-150.177	-151.6	-151.356	-151.01	-156.072	-154.364	-157.174	-160.464	-156.92	-160.271	-161.34			50.3	-153.147	-154.878	-158.363	-157.834	-154.301	-157.162	-159.446	-155.225	-156.991	-158.977	-158.311	-159.939	-157.954	-159.422	-161.143	-158.492	-158.224	-157.683			50.3	-152.009	-155.28	-154.752	-150.613	-155.604	-156.098	-155.346
50.4	-151.049	-152.916	-150.071	-152.082	-151.763	-154.858	-150.595	-149.753	-151.514	-151.508	-150.594	-156.923	-153.784	-156.771	-159.818	-157.436	-159.644	-160.249			50.4	-154.038	-155.216	-158.326	-158.26	-154.004	-157.605	-159.39	-155.454	-157.076	-159.124	-157.875	-159.817	-157.633	-158.6	-161.079	-158.862	-158.015	-157.726			50.4	-152.608	-155.05	-153.604	-151.012	-156.08	-156.114	-155.361
50.5	-151.964	-153.45	-149.626	-152.872	-152.083	-154.797	-150.705	-149.541	-151.386	-150.78	-150.738	-156.463	-153.056	-157.078	-159.449	-158.441	-159.282	-158.767			50.5	-154.781	-155.575	-157.86	-158.093	-153.969	-157.582	-158.906	-156.481	-156.819	-159.078	-157.851	-159.28	-157.258	-158.152	-161.219	-159.735	-157.323	-157.283			50.5	-153.244	-154.828	-152.881	-151.829	-156.105	-155.923	-155.123
50.6	-152.81	-154.864	-149.665	-153.73	-151.302	-153.587	-151.378	-149.158	-151.231	-149.339	-151.843	-155.4	-152.843	-157.935	-159.61	-158.962	-159.17	-158.344			50.6	-154.969	-155.973	-157.232	-157.875	-154.133	-157.224	-158.427	-157.053	-156.487	-159.01	-158.065	-158.751	-157.287	-158.248	-161.684	-160.685	-156.682	-156.969			50.6	-153.572	-154.722	-153.35	-152.371	-155.635	-155.591	-155.122
50.7	-152.94	-156.18	-150.389	-154.245	-150.079	-152.137	-151.933	-148.679	-151.085	-148.663	-153.011	-155.016	-152.938	-158.81	-159.555	-158.801	-159.213	-159.563			50.7	-154.804	-156.286	-156.67	-157.849	-154.332	-156.632	-158.209	-156.642	-156.445	-159.007	-158.357	-158.439	-157.284	-158.408	-162.668	-161.25	-156.857	-157.062			50.7	-153.598	-154.437	-154.289	-152.881	-155.19	-155.333	-155.543
50.8	-152.263	-156.329	-151.006	-154.068	-149.615	-151.74	-152.022	-148.007	-150.842	-149.014	-153.233	-155.061	-153.031	-159.192	-158.77	-158.756	-159.602	-160.989			50.8	-154.509	-156.183	-156.365	-157.877	-154.323	-155.992	-158.466	-155.972	-156.293	-158.823	-158.597	-158.26	-157.035	-158.231	-163.611	-161.229	-157.506	-157.328			50.8	-153.453	-154.202	-154.759	-152.964	-154.917	-155.007	-155.682
50.9	-151.104	-155.146	-150.892	-153.7	-150.491	-152.433	-151.931	-147.001	-150.413	-149.121	-152.691	-155.132	-152.667	-158.925	-158.301	-159.106	-160.084	-161.295			50.9	-154.099	-155.72	-156.489	-157.955	-153.957	-155.723	-159.192	-155.681	-155.235	-158.467	-158.723	-158.108	-157.049	-158.048	-163.579	-160.819	-157.863	-157.631			50.9	-153.169	-154.363	-154.703	-152.133	-154.668	-154.655	-154.901
51	-149.859	-153.461	-151.142	-153.599	-151.791	-153.251	-151.985	-146.065	-150.119	-148.712	-152.206	-155.385	-152.085	-158.363	-159.169	-159.376	-159.937	-160.867			51	-153.809	-155.341	-157.129	-158.179	-153.348	-155.921	-160.036	-155.8	-153.844	-158.317	-158.739	-157.737	-157.585	-158.404	-162.557	-160.419	-157.972	-157.92			51	-152.986	-154.708	-154.506	-151.2	-154.495	-154.401	-154.065
51.1	-149.102	-152.38	-152.191	-153.542	-151.985	-153.678	-151.773	-145.664	-150.638	-148.601	-151.897	-155.554	-152.188	-158.125	-160.609	-159.213	-159.56	-160.597			51.1	-154.029	-155.287	-158.068	-158.144	-152.927	-156.332	-160.594	-156.157	-153.478	-158.349	-158.317	-157.224	-158.374	-159.36	-161.494	-160.146	-158.106	-157.871			51.1	-153.371	-154.911	-154.238	-151.049	-154.338	-154.097	-154.471
51.2	-149.261	-152.161	-152.411	-153.235	-150.819	-153.473	-150.943	-146.058	-151.862	-148.872	-151.281	-155.304	-152.904	-158.195	-161.351	-158.689	-159.943	-160.539			51.2	-154.736	-155.624	-158.733	-157.916	-153.207	-156.812	-160.412	-156.483	-154.481	-158.419	-157.554	-157.342	-158.765	-160.238	-161.039	-160.016	-158.139	-157.204			51.2	-154.202	-154.807	-153.885	-151.651	-153.903	-153.777	-155.775
51.3	-150.256	-152.08	-151.454	-152.804	-149.551	-152.594	-150.151	-147.169	-152.53	-149.061	-150.635	-154.845	-153.686	-158.086	-161.24	-158.144	-160.834	-160.213			51.3	-155.385	-156.354	-158.862	-158.101	-154.422	-157.121	-159.495	-156.522	-155.891	-158.562	-157.253	-158.155	-158.269	-160.307	-161.184	-160.106	-157.935	-156.253			51.3	-154.87	-154.509	-153.839	-152.754	-153.43	-153.656	-156.626
51.4	-151.24	-152.001	-150.509	-152.285	-149.254	-151.814	-150.154	-148.698	-151.777	-148.965	-150.595	-154.555	-154.392	-157.731	-160.862	-157.743	-161.329	-159.574			51.4	-155.506	-157.168	-158.897	-158.538	-155.902	-156.813	-158.625	-156.484	-156.593	-158.727	-157.351	-158.734	-157.437	-159.56	-161.678	-160.347	-157.591	-155.825			51.4	-155.198	-154.414	-154.254	-154.06	-153.36	-153.729	-156.453
51.5	-151.363	-152.735	-150.182	-151.674	-149.887	-152.05	-150.802	-150.436	-150.756	-148.471	-151.103	-154.454	-154.827	-157.38	-160.529	-157.34	-161.208	-159.44			51.5	-155.163	-157.526	-159.229	-158.941	-156.416	-155.879	-158.277	-156.801	-156.555	-158.85	-157.172	-158.696	-157.071	-158.509	-162.13	-160.345	-157.253	-156.248			51.5	-155.348	-154.325	-154.793	-155.026	-153.473	-153.845	-155.751
51.6	-151.005	-154.24	-150.577	-151.413	-150.75	-153.271	-151.85	-151.848	-150.903	-147.841	-151.611	-154.359	-154.586	-157.159	-160.178	-156.807	-160.8	-160.557			51.6	-154.907	-157.073	-159.402	-159.202	-155.917	-154.824	-158.202	-157.355	-156.259	-158.969	-156.943	-158.362	-157.046	-157.914	-162.223	-159.802	-156.863	-157.01			51.6	-155.304	-153.641	-155.235	-155.153	-153.519	-153.839	-155.161
51.7	-150.88	-155.386	-151.22	-151.744	-150.853	-154.503	-152.933	-152.077	-151.641	-147.674	-151.687	-154.419	-153.621	-157.19	-159.889	-156.386	-160.436	-162.013			51.7	-155.123	-156.044	-158.994	-159.046	-155.612	-154.177	-158.124	-157.602	-155.765	-159.184	-156.946	-157.985	-157.027	-158.135	-161.975	-159.042	-156.598	-157.413			51.7	-155.191	-152.577	-155.198	-154.271	-153.743	-153.942	-154.764
51.8	-151.192	-155.314	-151.577	-152.398	-150.251	-155.041	-153.365	-151.045	-152.015	-148.032	-151.498	-155.091	-152.588	-157.535	-159.996	-156.475	-160.295	-162.333			51.8	-155.535	-155.088	-158.386	-158.577	-155.872	-154.099	-157.969	-157.421	-155.094	-159.196	-156.888	-157.632	-157.206	-158.535	-161.689	-158.678	-156.719	-157.296			51.8	-155.223	-151.886	-154.446	-152.838	-154.498	-154.53	-154.619
51.9	-152.012	-154.181	-151.917	-153.327	-150.501	-155.175	-153.129	-149.625	-151.998	-148.505	-151.719	-156.153	-152.2	-157.803	-160.537	-157.005	-160.421	-161.51			51.9	-155.846	-154.757	-157.949	-158.183	-156.073	-154.58	-157.877	-157.24	-154.477	-158.67	-156.899	-157.382	-157.769	-158.548	-161.662	-158.965	-157.101	-156.856			51.9	-155.155	-152.227	-153.758	-151.803	-155.436	-155.208	-154.94
52	-152.984	-153.138	-152.117	-154.228	-151.893	-155.12	-152.819	-148.594	-151.385	-148.756	-152.551	-156.628	-152.435	-157.793	-161.18	-157.619	-160.437	-160.572			52	-156.044	-155.306	-157.589	-157.966	-155.85	-155.333	-158.019	-157.247	-154.116	-158.144	-157.284	-157.388	-158.417	-158.436	-161.675	-159.397	-157.562	-156.299			52	-154.634	-153.695	-153.664	-151.764	-155.634	-155.324	-155.478
52.1	-153.388	-152.967	-151.697	-154.212	-152.482	-154.453	-152.605	-148.009	-150.554	-148.676	-153.123	-156.35	-152.904	-158.068	-161.365	-158.325	-159.983	-160.112			52.1	-156.092	-156.298	-157.144	-157.895	-155.351	-155.735	-158.327	-156.993	-154.05	-158.119	-157.553	-157.609	-158.786	-158.528	-161.41	-159.233	-158.126	-156.033			52.1	-153.781	-155.129	-153.743	-152.439	-155.088	-154.955	-155.838
52.2	-153.295	-153.38	-150.969	-153.369	-151.567	-153.464	-152.286	-147.802	-150.738	-148.687	-152.467	-156.026	-153.376	-158.6	-160.352	-159.225	-159.636	-160.13			52.2	-155.807	-156.886	-156.894	-158.26	-155.061	-155.723	-158.609	-156.422	-154.04	-158.394	-157.181	-157.568	-158.735	-158.864	-161.011	-158.534	-158.798	-156.251			52.2	-152.935	-155.452	-153.798	-153.2	-154.66	-154.468	-155.814
52.3	-153.1	-153.716	-150.399	-153.02	-150.946	-153.145	-151.7	-148.25	-151.896	-149.236	-151.183	-155.708	-153.604	-158.087	-158.594	-159.472	-160.154	-160.83			52.3	-155.098	-156.916	-157.176	-159.042	-155.104	-155.757	-158.879	-156.07	-154.018	-158.868	-156.833	-157.028	-158.223	-159.301	-160.776	-158.11	-159.141	-156.537			52.3	-152.431	-155.027	-154.095	-153.676	-154.453	-153.921	-155.298
52.4	-152.658	-153.45	-150.036	-153.437	-151.275	-153.267	-151.032	-148.981	-152.781	-149.966	-150.348	-155.228	-153.327	-156.432	-157.66	-158.446	-161.015	-162.087			52.4	-154.373	-156.646	-157.726	-159.366	-155.055	-155.978	-159.075	-156	-154.221	-159.422	-157.189	-156.472	-157.585	-159.626	-160.787	-158.392	-158.981	-156.557			52.4	-152.636	-154.608	-154.494	-153.583	-154.112	-153.706	-154.607
52.5	-151.936	-152.793	-150.021	-153.508	-151.325	-153.007	-150.924	-149.331	-152.922	-150.296	-149.861	-154.97	-152.731	-155.482	-158.027	-157.247	-161.141	-162.805			52.5	-154.05	-156.187	-158.002	-158.815	-154.858	-156.068	-158.971	-156.114	-154.694	-159.786	-157.724	-156.43	-157.421	-159.789	-160.906	-158.973	-158.752	-156.323			52.5	-153.439	-154.479	-154.544	-152.822	-153.821	-154.313	-154.326
52.6	-151.53	-152.533	-150.381	-152.591	-150.955	-152.74	-151.458	-149.562	-152.733	-150.51	-149.619	-155.069	-152.405	-155.981	-158.783	-156.998	-160.468	-162.439			52.6	-154.017	-155.812	-157.746	-158.241	-154.689	-155.851	-158.748	-156.532	-155.116	-159.94	-158.079	-156.991	-157.538	-159.811	-161.157	-159.532	-158.584	-155.956			52.6	-154.104	-154.567	-154.622	-152	-153.712	-155.093	-154.857
52.7	-151.582	-152.763	-150.67	-151.341	-150.873	-152.841	-151.795	-150.072	-152.443	-150.897	-150.044	-155.051	-152.547	-157.004	-159.123	-157.23	-159.813	-161.699			52.7	-153.967	-155.602	-157.256	-158.212	-154.524	-155.598	-158.88	-156.815	-155.036	-159.751	-158.486	-157.862	-157.452	-159.603	-161.56	-160.073	-158.382	-155.803			52.7	-154.215	-154.786	-155.145	-151.937	-153.599	-155.077	-155.755
52.8	-151.418	-153.14	-150.669	-150.739	-150.876	-153.198	-151.327	-150.751	-152.28	-150.699	-150.969	-154.81	-152.577	-157.879	-159.055	-156.98	-159.692	-161.347			52.8	-153.782	-155.176	-157.119	-158.19	-154.469	-155.547	-159.348	-156.524	-154.533	-159.161	-158.7	-158.572	-157.565	-159.001	-161.863	-160.304	-158.386	-155.987			52.8	-154.294	-155.171	-155.322	-152.563	-153.621	-154.635	-155.947
52.9	-151.024	-153.566	-150.695	-150.733	-150.658	-153.789	-150.531	-151.525	-152.459	-149.518	-151.718	-154.684	-152.185	-158.076	-158.945	-156.421	-160.063	-161.619			52.9	-153.626	-154.63	-157.402	-157.849	-154.606	-155.53	-159.682	-155.995	-154.354	-158.633	-158.406	-158.877	-158.021	-158.231	-161.922	-160.094	-158.702	-156.242			52.9	-154.741	-155.654	-154.778	-152.976	-154.001	-154.529	-155.319
53	-151.205	-153.84	-151.149	-150.687	-150.782	-154.15	-150.299	-152.296	-152.293	-148.332	-152.102	-154.94	-152.043	-157.372	-159.038	-156.252	-160.457	-162.164			53	-153.872	-154.718	-157.738	-157.81	-154.638	-155.483	-159.271	-155.745	-154.968	-158.532	-157.833	-158.954	-158.196	-157.933	-161.835	-159.73	-158.782	-156.494			53	-155.297	-156.06	-154.073	-152.901	-154.468	-154.544	-154.961
53.1	-151.995	-153.694	-152.045	-150.731	-151.381	-154.149	-150.783	-152.357	-151.084	-148.123	-152.102	-155.505	-152.728	-156.587	-159.511	-156.809	-160.352	-162.332			53.1	-154.654	-155.557	-157.83	-158.419	-154.495	-155.637	-158.025	-156.008	-155.847	-158.758	-157.258	-158.866	-157.95	-158.298	-161.716	-159.367	-158.129	-156.865			53.1	-155.61	-156.227	-153.436	-152.999	-154.73	-154.292	-155.309
53.2	-152.959	-153.146	-152.532	-151.269	-151.563	-154.34	-151.398	-151.515	-149.889	-148.707	-151.677	-155.438	-153.735	-156.538	-160.287	-157.813	-159.95	-161.864			53.2	-155.459	-156.207	-157.568	-158.857	-154.637	-156.032	-156.738	-156.592	-156.038	-158.942	-156.84	-158.592	-157.701	-158.797	-161.514	-159.148	-157.068	-157.199			53.2	-155.398	-156.059	-153.264	-153.337	-154.907	-154.027	-155.795
53.3	-153.902	-152.383	-151.85	-151.858	-150.862	-154.743	-151.674	-150.928	-150.133	-149.545	-151.521	-154.188	-154.071	-156.778	-160.701	-158.269	-159.526	-160.723			53.3	-155.722	-156.094	-157.128	-158.606	-154.975	-156.39	-156.223	-156.992	-155.517	-158.893	-156.805	-158.338	-157.871	-158.99	-161	-159.352	-156.338	-157.391			53.3	-154.788	-155.658	-154.068	-153.385	-155.006	-153.854	-156.026
53.4	-154.45	-151.974	-150.686	-152.229	-150.041	-154.615	-151.652	-151.192	-151.25	-150.752	-152.333	-152.871	-153.652	-156.832	-160.437	-157.97	-158.998	-159.201			53.4	-155.53	-155.769	-156.674	-158.27	-154.635	-156.425	-156.674	-157.045	-155.334	-158.622	-157.056	-158.115	-158.569	-159.111	-160.314	-159.828	-156.424	-157.716			53.4	-154.36	-155.448	-155.164	-153.092	-154.727	-153.374	-155.995
53.5	-154.289	-152.415	-150.18	-152.894	-149.774	-153.712	-151.879	-151.236	-151.777	-152.023	-153.501	-152.874	-153.454	-157.273	-160.188	-157.653	-158.89	-158.301			53.5	-155.256	-155.729	-156.407	-158.404	-153.709	-156.136	-157.873	-157.07	-155.944	-158.155	-157.484	-157.972	-159.229	-159.371	-160.025	-160.242	-157.277	-158.021			53.5	-154.591	-155.643	-155.634	-152.83	-154.136	-152.739	-155.725
53.6	-153.374	-153.109	-150.225	-153.668	-149.817	-152.867	-152.567	-150.249	-151.366	-152.31	-153.676	-154.006	-153.756	-158.301	-160.32	-157.581	-159.381	-158.598			53.6	-154.855	-155.716	-156.559	-158.837	-153.467	-155.815	-159.211	-156.974	-156.35	-157.859	-158.236	-158.107	-159.204	-159.499	-160.364	-160.591	-158.245	-157.616			53.6	-155.466	-155.685	-155.826	-152.83	-153.604	-152.738	-155.277
53.7	-151.772	-153.305	-149.901	-153.621	-149.851	-153.081	-153.021	-149.143	-150.727	-151.35	-152.597	-155.146	-153.664	-158.949	-160.376	-157.455	-159.782	-159.601			53.7	-154.192	-155.517	-156.848	-159.038	-154.264	-155.419	-159.85	-156.33	-155.787	-157.987	-159.042	-158.329	-158.755	-159.261	-161.025	-160.828	-158.621	-156.545			53.7	-156.481	-155.379	-156.157	-153.104	-153.255	-153.459	-154.671
53.8	-150.283	-153.173	-149.209	-152.582	-149.942	-154.085	-152.762	-148.983	-150.72	-150.019	-151.576	-155.699	-152.907	-158.496	-160.121	-157.092	-160.006	-160.585			53.8	-153.692	-155.606	-156.745	-158.72	-154.967	-154.65	-159.627	-155.459	-154.881	-158.114	-159.501	-158.154	-158.621	-158.705	-161.54	-160.685	-158.483	-155.619			53.8	-157.088	-155.447	-156.192	-153.567	-153.191	-154.125	-153.894
53.9	-150.115	-152.952	-148.878	-151.257	-150.434	-154.734	-152.104	-149.468	-151.305	-149.507	-151.477	-155.401	-152.233	-157.426	-159.608	-156.741	-160.077	-161.174			53.9	-153.834	-156.236	-156.245	-157.959	-154.947	-153.79	-159.283	-155.092	-154.581	-158.122	-159.758	-157.711	-158.988	-158.252	-161.691	-160.265	-158.335	-155.294			53.9	-156.91	-155.753	-155.683	-153.8	-153.521	-154.092	-153.424
54	-151.276	-152.565	-149.111	-150.312	-151.52	-154.792	-151.222	-149.969	-151.457	-150.343	-151.692	-154.393	-152.284	-156.759	-159.079	-156.914	-159.666	-161.459			54	-154.462	-156.889	-155.831	-157.142	-155.007	-153.206	-159.246	-155.2	-155.099	-158.515	-159.936	-157.555	-159.289	-158.361	-161.544	-160.053	-158.326	-155.348			54	-156.093	-155.416	-154.968	-153.406	-154.173	-153.497	-153.698
54.1	-152.767	-152.57	-149.617	-150.309	-152.443	-154.612	-150.268	-150.405	-150.697	-151.448	-151.717	-153.585	-152.884	-156.848	-158.95	-157.699	-158.988	-161.73			54.1	-155.052	-157.113	-155.925	-156.965	-155.654	-153.11	-159.276	-155.542	-155.887	-159.497	-159.638	-157.639	-159.174	-158.849	-161.328	-160.033	-158.399	-155.413			54.1	-155.206	-154.559	-154.597	-152.805	-154.88	-152.891	-154.58
54.2	-153.577	-153.299	-149.925	-151.534	-152.432	-154.421	-149.928	-150.698	-149.825	-151.113	-151.688	-153.454	-153.208	-157.296	-158.951	-158.448	-158.332	-161.995			54.2	-155.36	-156.971	-156.273	-157.651	-156.031	-153.649	-159.278	-156.051	-156.208	-160.441	-158.722	-157.76	-158.993	-159.095	-161.357	-159.893	-158.48	-155.264			54.2	-154.496	-153.941	-154.829	-152.635	-155.305	-152.519	-155.862
54.3	-152.959	-153.815	-149.662	-153.103	-152.068	-154.491	-150.853	-150.803	-149.677	-149.562	-151.782	-153.574	-152.844	-157.381	-158.836	-158.817	-157.565	-162.063			54.3	-155.847	-156.684	-156.272	-158.438	-155.316	-154.429	-159.169	-156.368	-155.798	-160.63	-157.794	-158.123	-158.786	-158.827	-161.552	-159.849	-158.404	-155.116			54.3	-154.049	-154.006	-155.287	-152.673	-155.556	-152.369	-157.077
54.4	-151.468	-153.458	-149.219	-154.038	-152.075	-154.789	-152.651	-151.017	-150.224	-148.694	-152.033	-153.87	-151.985	-156.66	-159.233	-158.813	-157.081	-162.176			54.4	-156.728	-156.364	-155.811	-158.553	-154.05	-154.947	-158.931	-156.082	-155.019	-160.363	-157.493	-158.579	-158.167	-158.474	-161.539	-160.123	-158.334	-155.525			54.4	-154.008	-154.619	-155.336	-152.737	-155.78	-152.684	-157.3
54.5	-150.712	-152.703	-149.09	-154.305	-152.268	-154.924	-153.627	-151.39	-151.13	-149.449	-152.253	-154.439	-151.083	-155.641	-160.431	-158.171	-157.582	-162.678			54.5	-157.249	-156.13	-155.398	-158.169	-153.248	-155.205	-158.983	-155.438	-154.403	-160.174	-157.728	-158.614	-157.425	-158.424	-161.308	-160.304	-158.616	-156.235			54.5	-154.231	-155.032	-154.868	-153.135	-155.709	-153.607	-156.436
54.6	-151.132	-152.185	-149.22	-154.105	-152.333	-154.636	-152.998	-151.456	-152.051	-150.956	-152.33	-154.761	-150.856	-155.183	-161.551	-157.309	-158.584	-163.013			54.6	-156.959	-156.062	-155.597	-158.027	-153.218	-155.436	-159.451	-155.191	-154.119	-159.888	-158.061	-158.249	-157.565	-158.444	-161.272	-160.134	-158.935	-156.423			54.6	-154.535	-154.775	-154.407	-153.652	-155.302	-154.718	-155.408
54.7	-151.469	-151.936	-149.568	-153.669	-152.306	-153.996	-152.018	-150.892	-152.233	-151.799	-151.977	-154.676	-151.707	-155.481	-161.67	-157.154	-159.048	-162.605			54.7	-156.205	-155.991	-156.351	-158.247	-153.538	-155.797	-159.811	-155.501	-154.143	-159.288	-158.444	-158.069	-158.801	-158.202	-161.56	-159.782	-158.746	-156.128			54.7	-154.869	-154.244	-154.282	-153.819	-154.83	-155.558	-154.786
54.8	-150.736	-151.904	-149.847	-152.745	-152.274	-153.16	-151.75	-150.136	-151.382	-151.507	-150.789	-154.672	-153.187	-156.154	-160.885	-157.486	-159.061	-162.246			54.8	-155.396	-155.869	-157.226	-158.307	-153.931	-156.124	-159.766	-155.925	-154.54	-158.496	-158.841	-158.279	-159.953	-157.961	-161.815	-159.388	-158.214	-155.947			54.8	-154.96	-154.082	-154.421	-153.737	-154.652	-155.859	-154.537
54.9	-149.752	-152.171	-149.62	-151.44	-151.999	-152.39	-151.996	-149.681	-150.171	-150.789	-149.578	-155.027	-154.413	-156.701	-159.757	-157.455	-159.262	-162.481			54.9	-154.775	-155.978	-157.981	-158.121	-154.465	-156.125	-159.443	-156.219	-155.117	-157.872	-158.993	-158.419	-160.038	-158.271	-161.999	-159.106	-157.92	-156.119			54.9	-154.587	-154.484	-154.79	-153.669	-154.839	-155.524	-154.588
55	-149.429	-152.54	-149.287	-151.173	-151.477	-152.102	-152.214	-149.354	-149.481	-150.482	-149.423	-155.518	-154.767	-156.812	-158.948	-157.042	-159.728	-162.595			55	-154.517	-156.408	-158.29	-158.119	-154.962	-155.934	-158.899	-156.469	-155.478	-157.924	-158.882	-158.243	-159.337	-159.12	-162.23	-159.151	-158.003	-156.409			55	-154.089	-155.047	-155.073	-153.546	-154.654	-154.769	-154.976
55.1	-149.556	-152.992	-149.345	-152.369	-151.28	-152.314	-152.178	-149.168	-149.853	-150.901	-150.167	-155.813	-154.262	-156.492	-158.948	-156.78	-160.142	-162.536			55.1	-154.787	-156.923	-157.786	-158.34	-155.051	-156.025	-158.102	-156.753	-155.312	-158.455	-158.585	-158.14	-158.407	-159.914	-162.259	-159.675	-158.123	-156.511			55.1	-153.915	-155.142	-154.862	-153.197	-153.594	-153.839	-155.469
55.2	-150.068	-153.817	-149.48	-153.266	-151.43	-152.599	-152.053	-149.426	-150.585	-151.718	-151.081	-155.495	-153.554	-156.248	-159.306	-156.941	-160.112	-162.698			55.2	-155.506	-157.381	-156.811	-158.582	-154.577	-156.267	-157.455	-156.82	-154.522	-158.502	-158.192	-158.601	-157.509	-160.062	-162.083	-160.607	-158.14	-156.481			55.2	-154.215	-154.707	-154.305	-152.952	-152.509	-153.017	-155.778
55.3	-150.944	-154.844	-149.258	-152.57	-151.333	-152.456	-151.911	-150.004	-150.551	-151.933	-151.807	-154.579	-153.254	-156.36	-159.244	-157.515	-159.569	-162.631			55.3	-156.393	-157.678	-156.22	-158.876	-153.971	-156.013	-157.642	-156.339	-153.649	-158.046	-157.95	-159.471	-157.107	-159.4	-161.876	-161.453	-158.245	-156.49			55.3	-154.654	-154.319	-153.845	-153.119	-152.449	-152.709	-155.884
55.4	-151.761	-155.237	-148.812	-151.287	-150.986	-151.992	-151.825	-150.516	-150.098	-150.989	-152.486	-153.71	-153.329	-156.444	-158.862	-158.022	-159.092	-161.973			55.4	-157.266	-157.516	-156.228	-159.065	-153.867	-155.243	-158.628	-155.737	-153.427	-158.042	-158.053	-159.932	-157.615	-158.592	-161.593	-161.68	-158.367	-156.567			55.4	-154.733	-154.456	-153.76	-153.218	-153.218	-152.846	-155.627
55.5	-152.366	-154.547	-148.497	-151.016	-150.965	-152.125	-151.915	-150.759	-149.987	-149.899	-153.184	-153.34	-153.214	-156.711	-158.897	-157.861	-159.35	-161.05			55.5	-157.574	-156.712	-156.346	-158.986	-154.299	-154.47	-159.608	-155.815	-153.811	-158.641	-158.22	-159.652	-158.756	-158.569	-161.36	-161.265	-158.074	-156.63			55.5	-154.538	-155.049	-153.87	-152.866	-154.112	-152.946	-154.961
55.6	-152.523	-153.255	-148.212	-151.652	-151.521	-153.089	-152.103	-150.86	-149.899	-149.769	-153.194	-153.456	-152.581	-157.583	-159.548	-157.131	-160.27	-160.616			55.6	-156.8	-155.704	-156.19	-158.899	-155.059	-154.092	-159.859	-156.392	-154.17	-159.162	-157.938	-159.104	-159.767	-159.263	-161.28	-160.477	-157.414	-156.589			55.6	-154.439	-155.556	-153.894	-152.462	-154.862	-152.941	-154.438
55.7	-151.857	-152.4	-147.558	-152.453	-152.247	-154.148	-152.215	-150.898	-149.731	-150.294	-152.289	-153.786	-151.989	-158.306	-160.199	-156.602	-161.03	-161.184			55.7	-155.699	-155.306	-155.96	-158.895	-155.85	-154.265	-159.31	-156.797	-154.204	-159.25	-157.599	-158.828	-160.06	-159.898	-161.073	-159.734	-156.965	-156.633			55.7	-154.503	-155.6	-154.178	-152.279	-155.346	-153.179	-154.522
55.8	-150.946	-152.676	-146.852	-153.198	-152.435	-154.789	-152.205	-150.777	-149.656	-150.629	-151.663	-154.281	-152.117	-158.047	-160.117	-156.844	-160.891	-162.062			55.8	-155.328	-155.497	-156.042	-158.95	-156.263	-154.792	-158.608	-156.913	-154.21	-159.057	-157.835	-158.908	-159.737	-160.096	-160.724	-159.609	-156.889	-156.857			55.8	-154.43	-155.234	-154.91	-152.23	-155.567	-153.656	-154.855
55.9	-150.704	-153.586	-146.582	-153.473	-152.069	-155.046	-152.114	-150.728	-149.408	-150.458	-152.094	-154.555	-152.743	-157.192	-159.289	-157.617	-160.049	-162.148			55.9	-155.65	-155.518	-156.315	-158.966	-156.216	-155.234	-158.33	-156.976	-154.439	-159.084	-158.079	-158.836	-159.284	-159.87	-160.647	-160.161	-157.049	-156.807			55.9	-153.979	-154.809	-155.496	-152.413	-155.7	-154.053	-154.799
56	-150.95	-154.222	-146.409	-153.131	-152.084	-154.75	-151.777	-151.122	-149.502	-150.227	-152.927	-153.892	-153.004	-156.761	-158.957	-158.477	-159.357	-161.619			56	-156.191	-155.374	-156.452	-158.586	-155.706	-155.178	-158.147	-157.146	-154.61	-159.335	-157.72	-158.23	-158.928	-159.359	-160.789	-160.539	-157.495	-156.28			56	-153.411	-154.604	-155.691	-152.708	-155.833	-154.352	-154.348
56.1	-150.927	-154.429	-146.426	-152.704	-153.027	-153.823	-150.832	-151.65	-150.963	-150.299	-153.33	-152.815	-152.752	-157.139	-159.92	-158.981	-159.301	-161.261			56.1	-156.433	-155.616	-156.368	-158.065	-154.798	-154.534	-157.683	-157.117	-154.637	-159.008	-157.265	-157.452	-158.747	-158.761	-160.855	-160.216	-158.047	-155.644			56.1	-153.339	-154.758	-155.666	-152.742	-155.9	-154.55	-153.982
56.2	-150.68	-154.515	-147.011	-152.241	-154.046	-153.208	-149.636	-151.308	-152.962	-150.162	-153.057	-152.482	-152.415	-157.776	-160.996	-158.776	-159.805	-160.973			56.2	-156.128	-156.203	-156.079	-157.921	-153.878	-153.748	-157.307	-156.387	-154.789	-158.117	-157.229	-156.871	-158.72	-158.221	-160.984	-159.815	-158.183	-155.267			56.2	-153.979	-155.371	-155.315	-152.776	-155.926	-154.48	-154.368
56.3	-150.96	-154.555	-147.742	-151.458	-153.817	-153.481	-149.485	-149.827	-153.627	-149.736	-152.217	-153.002	-151.732	-158.191	-160.952	-158.129	-160.384	-160.743			56.3	-155.668	-156.767	-155.912	-158.017	-153.515	-153.46	-157.241	-155.18	-154.889	-157.737	-157.542	-156.6	-158.623	-157.808	-161.183	-159.844	-157.721	-155.296			56.3	-154.799	-156.224	-154.825	-153.417	-155.891	-154.343	-155.742
56.4	-151.72	-154.347	-148.384	-150.931	-152.378	-153.94	-150.673	-148.568	-152.843	-149.89	-151.334	-153.772	-150.856	-158.33	-160.19	-157.555	-160.547	-161.239			56.4	-155.571	-157.07	-156.329	-158.152	-153.978	-153.826	-157.495	-154.399	-154.645	-158.167	-157.915	-156.863	-158.391	-157.55	-161.382	-160.016	-157.129	-155.672			56.4	-155.187	-156.793	-154.674	-154.452	-155.559	-154.509	-157.019
56.5	-152.143	-153.555	-148.86	-151.292	-150.967	-154.042	-151.762	-148.822	-151.829	-150.315	-151.012	-154.355	-151.085	-157.956	-159.619	-157.12	-160.26	-162.341			56.5	-155.852	-156.855	-156.922	-158.471	-154.85	-154.505	-158.251	-154.564	-154.332	-158.756	-157.962	-157.418	-158.245	-157.537	-161.73	-160.126	-157.124	-156.388			56.5	-155.15	-156.645	-154.907	-155.136	-155.026	-154.903	-156.909
56.6	-152.189	-152.651	-148.89	-151.816	-150.535	-154.169	-151.622	-150.227	-150.955	-149.712	-151.428	-154.761	-152.429	-157.174	-159.364	-157.05	-159.824	-162.951			56.6	-156.148	-156.129	-156.993	-158.752	-155.429	-155.111	-159.158	-155.258	-154.201	-158.825	-157.675	-157.786	-158.334	-157.808	-161.978	-160.227	-157.63	-157.122			56.6	-155.007	-155.718	-155.218	-155.128	-154.554	-155	-155.531
56.7	-152.251	-152.549	-148.565	-151.839	-150.937	-154.61	-150.771	-151.351	-150.002	-148.426	-152.464	-155.204	-153.16	-156.787	-159.089	-157.722	-159.445	-162.289			56.7	-156.132	-155.527	-156.904	-158.485	-155.506	-155.353	-159.413	-155.686	-154.189	-158.483	-157.559	-158.073	-158.654	-157.969	-161.86	-160.444	-157.805	-157.297			56.7	-154.756	-154.491	-155.283	-154.468	-154.308	-154.41	-154.128
56.8	-152.09	-153.062	-148.159	-152.068	-151.475	-154.819	-150.192	-151.266	-149.362	-148.166	-153.551	-155.233	-152.989	-156.967	-159.016	-158.537	-159.339	-160.826			56.8	-155.817	-155.328	-157.272	-157.933	-155.39	-155.373	-158.696	-155.618	-154.371	-158.558	-157.74	-158.413	-159.011	-157.702	-161.646	-160.82	-157.515	-156.939			56.8	-154.486	-153.858	-154.779	-153.544	-154.452	-153.585	-153.581
56.9	-151.48	-153.258	-147.912	-152.959	-151.611	-154.299	-149.84	-150.646	-149.732	-149.518	-153.655	-154.476	-153.048	-157.086	-159.458	-158.769	-159.638	-159.965			56.9	-155.385	-155.257	-157.742	-157.866	-155.127	-155.535	-157.699	-155.632	-154.707	-158.94	-157.816	-158.583	-159.173	-157.393	-161.504	-161.06	-157.512	-156.512			56.9	-154.686	-153.933	-154.006	-153	-154.714	-153.528	-153.809
57	-150.873	-153.007	-148.125	-153.92	-151.001	-153.432	-149.412	-150.44	-150.849	-151.22	-152.539	-153.761	-153.238	-157.141	-159.983	-158.518	-159.821	-160.412			57	-155.004	-155.524	-157.975	-158.195	-154.501	-155.621	-157.42	-156.159	-154.961	-158.689	-157.753	-158.425	-159.146	-157.516	-161.438	-161.043	-158.067	-156.328			57	-155.263	-153.86	-153.835	-153.108	-154.526	-154.466	-154.342
57.1	-150.784	-152.837	-148.837	-154.561	-150.031	-152.587	-149.699	-150.419	-151.483	-151.52	-151.215	-153.875	-152.604	-157.498	-160.178	-157.965	-159.152	-161.435			57.1	-154.747	-156.328	-158.138	-158.401	-153.897	-155.509	-157.798	-156.832	-155.18	-157.99	-157.998	-158.003	-159.06	-157.96	-161.543	-161.052	-158.491	-156.423			57.1	-155.349	-153.488	-154.439	-153.486	-153.857	-155.345	-154.815
57.2	-151.138	-152.781	-149.398	-154.861	-149.801	-151.862	-151.203	-150.247	-151.548	-150.374	-150.712	-154.487	-151.164	-157.885	-160.37	-157.249	-158.12	-162.172			57.2	-154.592	-157.275	-158.177	-158.423	-153.898	-155.735	-158.093	-157.008	-155.458	-157.874	-158.429	-157.61	-158.85	-158.239	-161.407	-161.152	-158.252	-156.532			57.2	-154.837	-153.476	-155.231	-153.396	-153.345	-155.241	-155.272
57.3	-151.469	-152.643	-149.632	-154.419	-150.844	-151.579	-152.579	-150.312	-151.724	-149.609	-151.071	-154.945	-149.999	-158.086	-160.839	-156.578	-158.082	-162.202			57.3	-154.451	-157.921	-157.951	-158.338	-154.403	-156.253	-158.108	-156.586	-155.701	-158.407	-158.5	-157.674	-158.391	-158.079	-160.676	-161.066	-157.7	-156.435			57.3	-154.446	-153.796	-155.658	-152.826	-153.475	-154.44	-155.69
57.4	-151.593	-152.423	-150.131	-152.996	-152.346	-151.957	-152.436	-150.357	-151.359	-149.936	-151.767	-155.151	-149.943	-158.265	-161.41	-156.145	-159.049	-161.399			57.4	-154.153	-158.05	-157.493	-158.115	-154.992	-156.272	-157.986	-156.091	-155.9	-158.809	-158.389	-158.194	-158.23	-157.918	-160	-160.628	-157.336	-156.181			57.4	-154.184	-153.748	-155.475	-152.656	-153.947	-153.814	-155.643
57.5	-151.663	-151.885	-150.351	-151.376	-152.872	-153.027	-151.154	-149.629	-149.668	-150.3	-152.621	-155.516	-150.559	-158.178	-161.857	-156.537	-159.941	-160.4			57.5	-153.81	-157.722	-156.873	-157.993	-155.332	-155.675	-157.7	-155.984	-155.918	-158.807	-158.569	-158.543	-158.995	-158.471	-160.095	-159.96	-157.44	-155.987			57.5	-153.798	-153.224	-154.969	-152.88	-154.156	-153.655	-155.111
57.6	-151.828	-151.116	-149.596	-150.748	-152.203	-154.059	-149.823	-148.658	-147.744	-150.134	-153.565	-155.826	-151.028	-157.665	-162.038	-157.738	-160.117	-160.057			57.6	-153.893	-157.109	-156.398	-158.15	-155.336	-155.074	-157.48	-156.173	-155.419	-158.649	-158.818	-158.482	-160.143	-159.412	-160.695	-159.393	-158.043	-155.939			57.6	-153.801	-152.822	-154.684	-152.813	-153.914	-153.513	-154.538
57.7	-152.119	-151.023	-148.62	-151.248	-151.47	-154.269	-148.794	-148.168	-147.418	-149.8	-153.898	-155.396	-151.153	-157.183	-161.554	-158.57	-159.768	-160.23			57.7	-154.398	-156.38	-156.422	-158.181	-155.188	-154.701	-157.787	-156.353	-154.649	-158.49	-158.617	-158.133	-160.566	-159.769	-161.046	-159.197	-158.639	-155.92			57.7	-154.355	-152.915	-154.722	-152.494	-153.762	-153.213	-154.024
57.8	-152.417	-151.609	-148.341	-151.851	-151.34	-154.238	-148.329	-147.813	-148.999	-149.906	-153.369	-154.415	-151.243	-157.087	-160.26	-158.472	-159.744	-160.247			57.8	-154.973	-155.87	-156.837	-157.716	-155.242	-154.481	-158.555	-156.461	-154.123	-158.434	-158.253	-157.482	-160.112	-159.552	-160.996	-159.408	-158.721	-156.063			57.8	-154.754	-153.427	-154.829	-152.424	-154.232	-153.368	-153.528
57.9	-152.586	-151.904	-148.652	-151.82	-151.272	-154.251	-149.248	-147.601	-151.064	-150.314	-152.84	-153.708	-151.512	-157.334	-158.985	-158.132	-160.314	-159.91			57.9	-155.452	-156.105	-157.178	-157.185	-155.618	-154.484	-159.313	-156.487	-153.847	-158.511	-158.495	-156.982	-159.47	-159.336	-161.056	-159.76	-158.627	-156.429			57.9	-154.794	-154.155	-154.95	-152.923	-154.887	-154.153	-153.37
58	-152.651	-151.86	-148.774	-151.531	-150.836	-153.829	-151.348	-148.167	-152.032	-150.099	-152.83	-154.048	-151.632	-157.595	-158.781	-158	-160.8	-159.521			58	-155.642	-157.154	-157.153	-157.199	-155.868	-154.722	-159.756	-156.373	-153.78	-158.765	-159.109	-157.276	-159.2	-159.086	-161.387	-159.954	-159.023	-156.554			58	-155.25	-154.812	-155.155	-153.713	-155.191	-154.728	-153.838
58.1	-152.603	-151.828	-148.596	-151.557	-150.653	-153.363	-152.907	-149.471	-151.956	-149.279	-152.954	-155.441	-151.39	-157.57	-159.481	-157.656	-160.801	-159.456			58.1	-155.53	-158.093	-157.146	-157.544	-155.925	-154.827	-159.758	-156.113	-154.012	-159.28	-158.987	-157.947	-159.249	-158.801	-161.537	-160.076	-159.762	-156.161			58.1	-156.42	-155.15	-155.398	-154.15	-155.294	-154.494	-154.54
58.2	-152.211	-151.951	-149.013	-151.681	-151.325	-153.267	-152.852	-150.687	-152.222	-149.17	-152.807	-156.633	-151.292	-157.409	-160.147	-157.308	-160.306	-159.782			58.2	-155.231	-158.072	-157.521	-157.627	-156.121	-154.632	-159.488	-155.882	-154.642	-159.807	-158.172	-158.031	-159.106	-159.12	-161.27	-160.219	-160.014	-155.759			58.2	-157.274	-155.03	-155.446	-153.906	-155.187	-153.915	-154.711
58.3	-151.658	-152.462	-149.962	-151.662	-152.495	-153.255	-151.771	-151.117	-153.09	-149.992	-152.232	-156.42	-151.535	-157.253	-160.21	-157.933	-159.403	-160.245			58.3	-154.596	-157.452	-157.767	-157.702	-156.288	-154.436	-159.366	-155.925	-155.456	-159.741	-157.87	-157.74	-158.639	-160.033	-161.021	-160.222	-159.556	-155.604			58.3	-156.724	-154.469	-155.035	-153.206	-154.591	-153.852	-154.324
58.4	-151.402	-153.114	-150.037	-151.641	-153.336	-153.143	-150.637	-150.783	-153.294	-150.318	-151.602	-155.352	-151.842	-157.106	-159.622	-159.185	-158.591	-160.655			58.4	-153.81	-157.142	-157.469	-158.116	-156.115	-154.283	-159.384	-156.029	-155.913	-158.868	-158.286	-158.158	-158.07	-160.515	-161.189	-160.146	-158.947	-155.362			58.4	-155.251	-154.005	-154.252	-152.544	-153.881	-154.191	-154.068
58.5	-151.541	-153.566	-148.888	-151.518	-153.192	-153.031	-149.987	-150.035	-152.388	-149.623	-151.57	-154.661	-152.37	-157.27	-159.102	-159.412	-158.332	-160.962			58.5	-153.521	-157.404	-156.909	-158.308	-155.808	-154.2	-159.042	-155.814	-155.958	-157.947	-158.839	-159.227	-157.539	-159.982	-161.521	-160.126	-158.379	-155.047			58.5	-154.468	-154.183	-153.609	-152.267	-153.802	-154.294	-154.388
58.6	-151.825	-153.986	-147.368	-151.271	-152.167	-153.104	-149.995	-149.141	-151.466	-148.976	-151.996	-154.612	-153.082	-157.69	-159.535	-158.336	-158.616	-160.75			58.6	-153.887	-157.752	-156.421	-158.048	-155.704	-154.588	-158.365	-155.467	-155.93	-157.725	-159.181	-159.734	-157.375	-158.931	-161.536	-159.872	-157.658	-154.932			58.6	-154.868	-154.719	-153.468	-152.731	-154.352	-154.191	-155.007
58.7	-151.677	-154.502	-145.934	-151.044	-150.953	-153.233	-150.286	-148.632	-151.318	-148.992	-152.432	-154.954	-153.332	-157.815	-160.787	-157.511	-159.31	-159.845			58.7	-154.604	-157.801	-156.169	-158.005	-155.498	-155.381	-157.998	-155.357	-155.809	-158.151	-159.172	-159.195	-157.78	-158.412	-161.319	-159.252	-157.003	-155.071			58.7	-155.386	-154.889	-153.708	-153.774	-154.544	-154.129	-155.362
58.8	-151.117	-155.053	-144.903	-150.979	-150.273	-152.986	-150.189	-148.969	-151.621	-149.262	-152.768	-155.121	-152.792	-157.457	-161.727	-157.864	-159.995	-159.172			58.8	-155.45	-157.43	-156.196	-158.39	-155.094	-156.033	-158.086	-155.634	-155.5	-158.844	-158.936	-158.39	-158.357	-158.885	-161.391	-159.05	-156.937	-155.445			58.8	-155.421	-154.367	-154.021	-154.385	-153.831	-154.21	-155.318
58.9	-151.083	-155.512	-144.659	-151.334	-150.395	-152.465	-149.93	-149.828	-151.682	-149.606	-152.759	-154.522	-151.603	-156.987	-161.416	-158.708	-159.89	-159.485			58.9	-155.854	-156.503	-156.556	-158.634	-155.045	-156.219	-158.177	-156.095	-155.203	-159.32	-158.597	-158.163	-158.873	-159.589	-161.851	-159.86	-157.496	-155.964			58.9	-155.193	-153.548	-154.147	-153.996	-153.057	-154.397	-155.233
59	-151.643	-155.454	-145.544	-151.852	-150.848	-152.33	-149.99	-150.61	-151.347	-150.218	-152.522	-154.039	-150.455	-156.785	-160.327	-158.76	-159.012	-160.347			59	-155.639	-155.482	-157.117	-158.535	-155.425	-155.817	-158	-156.241	-155.045	-159.067	-158.335	-158.401	-159.46	-159.69	-162.088	-161.005	-158.091	-156.507			59	-154.73	-153.03	-153.878	-153.093	-153.271	-154.43	-155.228
59.1	-151.658	-154.47	-147.403	-151.906	-151.049	-152.757	-149.838	-151.037	-150.912	-150.858	-152.695	-154.938	-150.346	-156.987	-159.6	-157.495	-158.337	-160.997			59.1	-155.886	-155.456	-157.152	-158.469	-155.798	-155.146	-157.716	-156.101	-154.699	-158.314	-158.412	-158.578	-159.975	-159.38	-161.587	-161.759	-158.385	-156.929			59.1	-154.113	-153.108	-153.439	-152.712	-154.257	-154.218	-154.97
59.2	-150.567	-153.114	-148.827	-151.51	-151.023	-153.282	-148.955	-150.919	-150.512	-151.296	-153.262	-156.413	-151.451	-157.583	-159.397	-155.908	-158.471	-160.998			59.2	-156.789	-156.538	-156.572	-158.707	-155.93	-154.882	-157.585	-156.089	-154.077	-157.974	-158.671	-158.694	-160.023	-159.246	-160.735	-162.157	-158.646	-156.981			59.2	-153.65	-153.756	-153.588	-153.355	-155.011	-154.026	-154.297
59.3	-148.983	-152.489	-148.867	-151.02	-150.816	-153.588	-147.917	-150.079	-150.542	-151.602	-153.665	-156.896	-152.846	-158.168	-159.196	-155.305	-159.327	-160.33			59.3	-157.325	-157.405	-156.358	-159.229	-155.835	-155.213	-157.643	-156.216	-153.622	-158.172	-158.773	-159.066	-159.333	-159.414	-160.286	-162.191	-158.99	-156.55			59.3	-153.598	-154.709	-154.462	-154.111	-154.843	-154.171	-153.622
59.4	-148.082	-152.786	-148.603	-150.632	-150.725	-153.693	-147.785	-149.124	-151.524	-151.404	-153.81	-156.542	-153.492	-158.105	-159.085	-155.666	-160.545	-159.585			59.4	-157.118	-157.169	-156.409	-159.773	-155.603	-155.833	-157.872	-156.311	-153.509	-158.238	-158.711	-159.528	-158.223	-159.481	-160.629	-161.855	-159.208	-155.854			59.4	-154.283	-155.478	-155.19	-153.774	-153.833	-154.685	-153.481
59.5	-148.041	-152.996	-148.9	-150.578	-151.111	-153.48	-148.488	-148.946	-152.91	-150.493	-153.902	-156.106	-153.239	-157.244	-159.316	-155.968	-161.382	-159.691			59.5	-156.542	-156.546	-156.02	-160.096	-155.291	-156.389	-158.222	-156.446	-153.718	-158.034	-158.632	-159.444	-157.273	-159.231	-161.453	-161.435	-159.127	-155.338			59.5	-155.509	-155.645	-155.33	-152.702	-152.977	-155.235	-153.901
59.6	-148.025	-152.782	-148.936	-151.168	-151.387	-153.011	-149.171	-149.249	-153.334	-149.42	-154.009	-155.603	-152.595	-156.316	-159.599	-155.927	-161.064	-160.796			59.6	-156.201	-156.395	-155.792	-160.278	-155.036	-156.568	-158.332	-156.715	-154.553	-157.756	-158.604	-158.75	-156.762	-159.132	-162.09	-160.885	-158.894	-155.216			59.6	-156.309	-155.238	-155.25	-152.292	-153.25	-155.351	-154.393
59.7	-148.153	-153.223	-148.354	-152.116	-151.21	-152.764	-149.831	-149.453	-152.261	-148.672	-153.897	-154.99	-151.948	-156.113	-159.735	-156.396	-159.959	-161.95			59.7	-156.286	-156.571	-156.137	-160.034	-154.896	-156.207	-157.973	-156.824	-155.651	-157.804	-158.577	-158.242	-156.95	-159.293	-162.381	-160.164	-158.836	-155.449			59.7	-155.894	-154.958	-154.987	-152.861	-154.199	-154.9	-154.454
59.8	-148.897	-154.628	-148.305	-152.601	-151.177	-152.644	-150.738	-150.026	-150.83	-148.533	-153.546	-154.441	-151.071	-156.596	-159.782	-157.472	-159.183	-162.528			59.8	-156.395	-156.801	-156.562	-158.869	-154.81	-155.687	-157.573	-156.646	-156.029	-158.563	-158.786	-158.316	-157.865	-159.039	-162.576	-159.804	-158.926	-155.954			59.8	-154.549	-155.463	-154.221	-153.566	-154.441	-154.361	-154.235
59.9	-150.14	-155.803	-149.054	-152.359	-151.384	-152.36	-151.329	-150.996	-150.187	-149.099	-153.331	-154.14	-149.867	-157.224	-159.575	-158.093	-158.95	-162.637			59.9	-156.032	-157.268	-156.96	-157.359	-154.838	-155.645	-157.5	-156.556	-155.647	-159.552	-159.42	-158.391	-158.829	-158.31	-162.633	-160.136	-158.942	-156.378			59.9	-153.266	-156.102	-153.326	-153.865	-153.833	-154.216	-154.466
60	-151.526	-156.059	-149.418	-151.595	-151.64	-152.435	-151.18	-151.135	-150.427	-149.869	-153.23	-154.128	-149.365	-157.601	-159.196	-157.971	-158.748	-162.459			60	-155.271	-157.809	-157.387	-156.462	-155.005	-156.141	-157.481	-156.556	-155.396	-159.739	-159.816	-158.19	-159.263	-158.071	-162.335	-160.613	-158.947	-156.379			60	-152.728	-155.776	-153.056	-153.768	-153.631	-154.393	-155.248
60.1	-152.229	-155.615	-149.263	-150.831	-152.045	-153.016	-150.823	-149.857	-151.17	-150.107	-152.834	-154.352	-150.361	-157.774	-159.329	-157.611	-158.558	-162.01			60.1	-154.77	-157.821	-157.692	-156.327	-155.116	-156.66	-157.266	-156.284	-155.719	-159.019	-159.365	-158.272	-159.35	-158.773	-161.716	-160.582	-159.03	-156.014			60.1	-152.839	-154.686	-153.523	-153.493	-154.505	-154.689	-155.617
60.2	-151.694	-154.534	-149.094	-150.756	-152.321	-153.699	-150.875	-148.167	-151.885	-149.774	-151.992	-154.637	-152.113	-158.166	-160.035	-157.263	-158.912	-161.153			60.2	-154.748	-157.416	-157.641	-156.69	-155.138	-156.766	-156.822	-156.048	-156.035	-158.212	-158.465	-158.722	-159.242	-159.763	-161.044	-160.229	-159.222	-155.621			60.2	-152.972	-153.613	-154.282	-153.345	-155.807	-155.153	-154.992
60.3	-150.46	-153.287	-148.733	-151.216	-152.176	-153.951	-150.982	-147.267	-152.148	-149.405	-151.057	-154.811	-153.389	-158.765	-160.15	-157.023	-159.938	-160.036			60.3	-154.743	-157.046	-157.202	-157.243	-155.234	-156.396	-156.144	-156.369	-155.821	-157.757	-157.847	-159.104	-158.758	-160.378	-160.558	-160.024	-159.559	-155.671			60.3	-152.892	-152.852	-154.976	-153.485	-156.508	-155.47	-154.016
60.4	-149.37	-152.827	-148.317	-151.191	-151.996	-153.456	-150.433	-147.377	-151.595	-149.049	-150.665	-155.074	-153.64	-158.946	-159.343	-157.108	-160.991	-159.015			60.4	-154.195	-156.691	-156.818	-157.526	-155.268	-155.9	-155.661	-156.747	-155.44	-157.72	-157.964	-159.149	-158.097	-160.417	-160.284	-160.089	-159.691	-156.312			60.4	-153.047	-152.668	-155.613	-153.833	-156.158	-155.149	-153.668
60.5	-148.88	-153.092	-147.976	-150.466	-152.305	-152.983	-149.678	-148.205	-150.496	-148.772	-151.015	-155.548	-153.015	-158.468	-158.747	-157.448	-161.502	-158.439			60.5	-153.19	-156.399	-156.763	-157.518	-155.127	-155.678	-155.821	-156.473	-155.327	-158.198	-158.633	-158.847	-157.682	-159.803	-160.235	-160.492	-159.366	-156.776			60.5	-153.648	-153.389	-155.933	-154.006	-155.251	-154.423	-154.012
60.6	-149.096	-153.371	-147.46	-150.121	-152.944	-153.093	-149.269	-149.406	-150.092	-148.995	-151.681	-155.998	-151.954	-157.862	-158.976	-157.509	-161.371	-158.565			60.6	-152.62	-156.22	-157.038	-157.536	-155.264	-155.78	-156.42	-155.949	-155.439	-158.805	-159.112	-158.665	-157.484	-158.895	-160.691	-161.136	-158.818	-156.387			60.6	-154.239	-154.36	-155.518	-153.405	-154.683	-154.142	-154.427
60.7	-149.715	-153.502	-146.919	-150.453	-153.138	-152.896	-149.123	-150.56	-150.721	-149.722	-152.313	-156.177	-150.964	-157.503	-159.408	-157.121	-160.811	-159.566			60.7	-152.977	-155.904	-157.639	-157.363	-155.955	-155.871	-157.077	-155.902	-155.702	-159.012	-158.932	-158.997	-157.178	-158.377	-161.628	-161.46	-158.339	-155.771			60.7	-154.376	-154.366	-154.721	-152.196	-154.703	-154.806	-154.667
60.8	-150.061	-153.331	-146.955	-150.539	-152.664	-151.891	-149.391	-151.054	-150.977	-150.702	-152.438	-155.732	-150.496	-157.196	-159.379	-156.988	-160.078	-161.174			60.8	-153.426	-155.72	-158.221	-156.766	-156.794	-155.66	-157.615	-156.171	-156.004	-158.91	-158.484	-159.371	-156.91	-158.431	-162.362	-161.026	-157.921	-155.703			60.8	-154.131	-153.757	-154.341	-151.654	-154.959	-155.855	-154.834
60.9	-149.801	-152.688	-147.624	-150.356	-152.332	-151.129	-149.955	-150.563	-149.882	-151.547	-151.781	-154.506	-150.734	-157.091	-158.886	-157.589	-159.274	-162.143			60.9	-153.197	-156.246	-158.4	-156.342	-157.226	-155.454	-157.981	-156.073	-156.344	-158.654	-158.302	-159.297	-156.923	-158.677	-162.513	-160.135	-157.625	-155.81			60.9	-153.742	-153.689	-154.817	-152.586	-155.161	-156.325	-154.721
61	-149.702	-152.163	-148.267	-150.637	-152.377	-151.641	-150.428	-149.724	-148.339	-151.753	-151.14	-153.289	-151.115	-157.616	-158.282	-158.145	-158.725	-161.736			61	-152.662	-157.075	-158.25	-156.624	-157.062	-155.667	-158.381	-155.697	-156.687	-158.261	-158.093	-158.967	-157.002	-158.718	-162.23	-159.482	-157.607	-155.724			61	-153.182	-154.179	-155.75	-154.186	-155.159	-155.806	-154.317
61.1	-150.206	-152.059	-148.383	-151.079	-152.034	-152.981	-150.722	-149.349	-147.913	-151.326	-151.27	-153.046	-150.987	-158.376	-157.974	-158.031	-158.717	-160.743			61.1	-152.324	-157.312	-158.035	-157.243	-156.419	-156.078	-159.035	-155.91	-156.51	-158.007	-157.608	-158.514	-157.154	-158.49	-161.631	-159.359	-157.647	-155.706			61.1	-152.703	-154.584	-156.153	-155.043	-154.93	-154.683	-154.332
61.2	-150.593	-151.87	-148.01	-151.458	-151.189	-153.973	-150.961	-149.117	-149.032	-150.629	-151.862	-153.819	-150.732	-158.652	-158.146	-157.826	-159.212	-160.025			61.2	-152.324	-156.917	-157.891	-157.64	-155.666	-156.285	-159.692	-157.06	-155.679	-158.027	-157.585	-158.064	-157.456	-158.369	-160.926	-159.597	-157.421	-155.742			61.2	-152.912	-154.776	-155.58	-154.71	-154.533	-153.946	-154.804
61.3	-150.419	-151.656	-147.641	-152.001	-150.939	-154.212	-151.043	-148.465	-150.604	-149.735	-152.487	-154.91	-150.823	-158.332	-158.529	-158.035	-159.911	-159.946			61.3	-152.81	-156.681	-157.746	-157.829	-155.1	-156.323	-159.58	-158.362	-155.04	-158.007	-158.25	-158.054	-157.451	-158.666	-160.597	-159.759	-157.09	-155.708			61.3	-153.644	-155.132	-154.601	-153.779	-154.023	-154.148	-154.797
61.4	-149.793	-151.838	-147.661	-151.964	-152.115	-153.958	-150.571	-148.026	-151.241	-148.832	-153.131	-155.402	-151.076	-157.562	-158.945	-158.128	-160.299	-160.75			61.4	-153.797	-157.088	-157.443	-157.948	-154.77	-156.294	-158.563	-158.848	-155.139	-157.691	-158.875	-158.428	-157.038	-159.272	-160.869	-159.762	-157.01	-155.985			61.4	-154.171	-155.508	-154.216	-153.147	-153.651	-154.63	-154.173
61.5	-149.048	-152.073	-147.768	-151.119	-153.828	-153.852	-149.697	-148.521	-150.835	-148.42	-153.647	-155.096	-151.131	-156.718	-159.883	-157.622	-160.417	-161.98			61.5	-154.88	-157.53	-157.316	-157.881	-154.78	-156.117	-157.687	-158.157	-155.561	-157.292	-159.098	-158.641	-156.772	-159.711	-161.505	-159.976	-157.387	-156.747			61.5	-154.306	-155.139	-154.782	-153.317	-153.583	-154.561	-153.909
61.6	-148.862	-151.633	-147.834	-150.594	-154.761	-154.216	-149.32	-149.49	-150.403	-148.647	-153.861	-154.878	-151.132	-156.501	-161.18	-157.064	-160.67	-162.615			61.6	-155.345	-157.07	-157.804	-157.52	-155.141	-155.81	-157.713	-156.661	-155.866	-157.366	-158.954	-158.422	-156.817	-159.693	-162.207	-160.266	-158.284	-157.245			61.6	-154.381	-154.107	-155.493	-153.79	-153.637	-154.344	-154.63
61.7	-149.413	-150.463	-148.442	-150.446	-154.704	-154.662	-149.863	-150.097	-150.553	-149.081	-154.016	-155.192	-151.576	-157.041	-161.449	-156.886	-160.562	-162.052			61.7	-154.796	-155.895	-158.568	-157.145	-155.712	-155.662	-158.001	-155.275	-155.871	-158.105	-158.761	-157.95	-156.935	-159.619	-162.72	-160.253	-159.444	-156.799			61.7	-154.571	-153.539	-155.475	-153.817	-153.785	-154.765	-155.634
61.8	-150.012	-149.594	-149.685	-150.235	-154.188	-155.048	-150.647	-150.011	-150.981	-149.148	-153.952	-155.332	-152.25	-158.027	-160.398	-156.637	-159.629	-160.595			61.8	-153.537	-154.989	-158.981	-157.287	-156.237	-156.069	-157.791	-154.792	-155.499	-158.718	-158.976	-157.697	-156.892	-159.999	-162.862	-159.949	-160.231	-156.032			61.8	-154.755	-153.968	-154.874	-153.421	-154.249	-155.529	-155.916
61.9	-149.932	-150.17	-150.3	-150.855	-153.461	-155.407	-150.971	-149.347	-151.144	-148.797	-153.043	-154.716	-152.389	-159.16	-159.501	-156.386	-158.643	-159.268			61.9	-152.342	-154.751	-158.744	-157.563	-156.182	-156.816	-157.601	-155.17	-154.994	-158.534	-159.361	-157.739	-156.614	-160.712	-162.825	-159.539	-160.15	-155.865			61.9	-154.688	-154.86	-154.598	-152.836	-154.737	-155.929	-155.453
62	-149.35	-151.769	-149.311	-152.587	-152.454	-155.218	-150.637	-148.68	-151.131	-148.589	-151.708	-153.766	-151.695	-159.655	-159.503	-156.589	-158.325	-158.972			62	-151.936	-154.893	-157.924	-157.197	-155.582	-157.103	-158.087	-155.847	-154.853	-158.352	-159.466	-157.448	-156.393	-160.936	-162.654	-159.227	-159.56	-156.171			62	-154.083	-155.532	-155.019	-152.344	-154.792	-155.742	-154.952
62.1	-148.806	-152.616	-147.861	-154.022	-151.567	-154.271	-149.695	-148.745	-151.574	-148.792	-150.993	-153.342	-150.57	-159.105	-159.878	-156.796	-158.615	-159.481			62.1	-152.44	-155.093	-157.108	-156.605	-155.405	-156.74	-158.762	-156.409	-155.221	-159.052	-159.574	-156.715	-156.635	-160.042	-162.207	-158.985	-158.988	-156.332			62.1	-153.105	-155.507	-155.286	-152.392	-154.349	-155.093	-155.168
62.2	-148.188	-151.881	-147.217	-154.283	-151.306	-153.684	-148.872	-149.33	-152.328	-149.016	-151.19	-153.975	-149.892	-158.165	-160.078	-156.549	-159.343	-160.086			62.2	-153.141	-155.154	-156.836	-156.557	-155.956	-156.203	-159.093	-156.707	-155.708	-159.923	-160.104	-156.552	-157.487	-158.904	-161.695	-158.754	-158.539	-156.062			62.2	-152.736	-154.801	-154.965	-152.819	-153.74	-154.592	-155.944
62.3	-147.713	-150.799	-146.997	-153.556	-151.313	-154.138	-149.148	-149.551	-152.267	-149.08	-151.933	-155.041	-150.424	-157.585	-160.009	-156.325	-160.361	-160.526			62.3	-153.509	-155.133	-156.867	-157.088	-156.36	-155.888	-159.126	-156.711	-155.846	-159.87	-160.855	-157.458	-158.634	-158.791	-161.307	-158.799	-158.396	-155.299			62.3	-153.607	-153.982	-154.759	-153.182	-153.582	-154.841	-156.24
62.4	-148.458	-150.785	-146.871	-152.37	-150.707	-154.489	-150.481	-149.447	-151.365	-149.427	-152.607	-155.546	-151.956	-157.563	-159.935	-156.395	-161.335	-160.872			62.4	-153.926	-155.247	-156.759	-157.817	-156.126	-155.804	-158.819	-156.459	-155.634	-158.971	-161.288	-158.575	-159.245	-159.304	-160.846	-159.205	-158.632	-154.197			62.4	-154.869	-153.515	-154.877	-153.334	-153.773	-155.407	-155.667
62.5	-150.451	-151.362	-147.191	-151.404	-149.573	-154	-151.861	-149.393	-150.552	-150.366	-152.567	-155.59	-153.335	-157.557	-160.206	-156.702	-161.861	-161.204			62.5	-154.67	-155.368	-156.633	-158.26	-155.682	-155.793	-158.309	-156.192	-155.464	-158.015	-160.894	-159.12	-158.976	-159.39	-160.34	-159.541	-158.8	-153.419			62.5	-155.425	-153.532	-154.855	-153.26	-153.455	-155.809	-154.944
62.6	-151.868	-151.324	-148.091	-151.102	-149.145	-153.374	-152.221	-149.189	-149.875	-151.176	-151.833	-155.815	-153.846	-157.041	-160.626	-157.247	-161.725	-161.501			62.6	-155.328	-155.222	-156.874	-158.223	-155.72	-155.9	-157.937	-156.28	-155.566	-157.719	-159.826	-159.213	-158.46	-158.98	-160.3	-159.397	-158.575	-153.638			62.6	-155.285	-153.86	-154.798	-153.175	-152.698	-156.164	-154.771
62.7	-151.62	-150.583	-149.026	-151.234	-149.953	-153.326	-151.414	-148.81	-149.096	-151.131	-151.077	-155.998	-153.584	-156.583	-160.385	-157.419	-160.91	-161.675			62.7	-155.463	-155.008	-157.443	-157.941	-156.459	-156.026	-157.76	-156.922	-155.869	-158.146	-158.835	-159.083	-158.072	-158.643	-160.969	-159.034	-158.26	-154.576			62.7	-155.007	-154.185	-155.118	-153.403	-152.515	-156.346	-155.026
62.8	-150.688	-149.892	-149.408	-151.376	-151.045	-153.908	-150.423	-148.6	-148.692	-151.056	-150.931	-155.656	-152.811	-157.125	-159.517	-156.795	-159.544	-161.474			62.8	-154.847	-155.028	-157.815	-157.71	-157.157	-155.978	-157.795	-157.752	-156.16	-158.678	-158.022	-158.645	-157.675	-158.637	-161.776	-159.078	-158.144	-155.479			62.8	-154.736	-154.086	-155.346	-153.971	-153.106	-156.21	-155.331
62.9	-150.242	-149.897	-149.421	-151.56	-151.517	-154.72	-150.072	-148.603	-149.359	-151.489	-151.311	-155.089	-151.843	-158.13	-159.254	-156.129	-158.37	-160.573			62.9	-153.489	-155.287	-157.711	-157.565	-157.045	-156.048	-158.182	-158.098	-156.386	-158.993	-157.146	-158.12	-157.417	-158.871	-162.1	-159.559	-158.066	-156.091			62.9	-154.187	-153.365	-154.712	-154.618	-153.756	-155.899	-155.536
63	-150.16	-150.498	-149.53	-151.811	-151.672	-155.134	-150.148	-148.334	-151.1	-151.503	-151.572	-154.837	-151.101	-158.251	-160.055	-156.093	-158.302	-159.32			63	-152.151	-155.614	-157.615	-157.373	-156.542	-156.343	-158.798	-157.82	-156.657	-159.123	-156.827	-157.932	-157.524	-159.158	-161.939	-159.965	-157.925	-156.334			63	-153.666	-152.697	-153.537	-155.019	-154.025	-155.549	-155.477
63.1	-149.74	-150.736	-150.011	-152.05	-151.86	-154.588	-150.326	-147.65	-152.694	-150.819	-151.504	-155.067	-150.827	-157.432	-160.958	-156.265	-158.884	-158.53			63.1	-151.874	-155.802	-157.977	-157.264	-156.138	-156.319	-159.053	-157.265	-157.188	-158.898	-157.725	-158.048	-157.773	-159.362	-161.377	-159.934	-157.81	-156.188			63.1	-153.832	-152.687	-152.671	-154.902	-154.145	-155.252	-155.201
63.2	-148.997	-150.288	-150.616	-152.385	-151.794	-153.093	-150.595	-147.321	-153.101	-150.36	-151.614	-155.326	-150.735	-156.857	-161.103	-156.037	-158.932	-158.362			63.2	-152.574	-155.735	-158.367	-157.231	-155.552	-155.865	-158.521	-156.806	-158.062	-158.312	-159.173	-158.207	-157.762	-159.464	-160.697	-159.505	-157.758	-156			63.2	-154.368	-152.879	-152.471	-154.328	-154.183	-155.052	-154.806
63.3	-148.568	-150.349	-150.666	-152.877	-151.226	-151.741	-151.026	-147.901	-152.704	-150.285	-152.332	-155.028	-150.354	-157.472	-160.491	-155.54	-158.856	-158.56			63.3	-153.255	-155.445	-158.248	-157.137	-154.766	-155.814	-157.755	-156.537	-158.587	-157.68	-159.833	-158.263	-157.499	-159.607	-160.459	-158.958	-157.944	-156.038			63.3	-154.31	-152.684	-153.086	-153.588	-153.962	-155.013	-154.088
63.4	-148.67	-151.372	-150.204	-153.153	-150.533	-151.706	-151.64	-148.824	-152.093	-149.797	-153.297	-154.5	-149.82	-158.819	-159.656	-155.368	-159.497	-158.994			63.4	-153.515	-155.122	-157.8	-157.342	-154.404	-156.524	-157.611	-156.478	-157.881	-157.303	-159.399	-158.19	-157.33	-159.933	-160.682	-158.553	-158.228	-156.294			63.4	-153.344	-152.404	-154.225	-152.77	-153.663	-155.243	-153.276
63.5	-148.849	-152.276	-149.905	-152.523	-150.418	-152.621	-152.104	-149.51	-151.506	-148.938	-153.628	-154.328	-149.668	-159.645	-159.246	-155.951	-160.198	-159.727			63.5	-153.577	-154.848	-157.661	-157.983	-154.776	-157.341	-157.921	-156.85	-156.272	-157.098	-158.691	-158.144	-157.196	-160.305	-160.905	-158.367	-158.232	-156.712			63.5	-152.117	-152.92	-154.813	-152.04	-153.448	-155.741	-153.141
63.6	-148.699	-152.672	-149.636	-151.239	-151.088	-153.26	-151.996	-150.104	-151.166	-148.524	-153.132	-154.523	-149.981	-159.386	-159.806	-157.376	-160.24	-160.735			63.6	-153.598	-154.75	-158.03	-158.758	-155.395	-157.785	-158.013	-157.619	-155.086	-156.888	-158.362	-158.158	-156.807	-160.347	-161.075	-158.524	-158.145	-157.145			63.6	-151.792	-154.4	-154.47	-151.66	-153.4	-156.298	-153.903
63.7	-148.266	-152.966	-148.704	-150.737	-152.07	-153.52	-151.323	-150.591	-150.838	-148.816	-152.791	-154.705	-150.195	-158.477	-161.136	-159.194	-159.926	-161.618			63.7	-153.6	-155.045	-158.307	-159.309	-155.627	-158.001	-157.881	-158.164	-155.011	-156.878	-158.389	-158.113	-156.473	-159.855	-161.65	-159.114	-158.109	-157.416			63.7	-152.926	-155.768	-154.244	-151.532	-153.541	-156.644	-154.9
63.8	-147.889	-152.94	-147.663	-151.897	-152.72	-154.055	-150.706	-150.629	-150.124	-149.338	-152.86	-154.461	-150.354	-157.566	-162.118	-160.224	-159.578	-161.967			63.8	-153.606	-155.667	-158.002	-159.048	-155.46	-157.766	-157.917	-157.885	-155.476	-157.339	-158.479	-158.074	-156.583	-159.223	-162.489	-159.81	-157.791	-157.322			63.8	-154.517	-156.165	-154.917	-151.512	-153.592	-156.538	-155.42
63.9	-147.866	-152.434	-147.663	-153.58	-152.84	-155.09	-150.549	-150.158	-149.418	-149.662	-152.421	-153.95	-151.095	-157.128	-162.095	-159.42	-159.422	-161.815			63.9	-153.698	-156.215	-157.67	-158.001	-155.376	-156.841	-158.248	-157.109	-155.743	-158.213	-158.456	-158.079	-156.774	-158.967	-162.731	-160.33	-157.351	-156.841			63.9	-155.21	-155.879	-155.797	-151.792	-153.55	-155.933	-155.196
64	-148.291	-152.038	-148.291	-153.997	-152.641	-156.2	-150.459	-149.158	-149.312	-149.829	-151.582	-153.913	-151.954	-157.163	-161.571	-157.445	-159.898	-161.493			64	-153.994	-156.353	-158.17	-157.22	-155.511	-156.098	-158.663	-156.842	-155.633	-159.029	-158.425	-158.005	-156.662	-159.138	-162.31	-160.743	-157.376	-156.409			64	-155.005	-155.342	-155.825	-152.339	-153.629	-155.356	-154.45
64.1	-149.018	-152.133	-148.582	-153.462	-152.343	-156.805	-150.326	-148.085	-149.983	-149.819	-151.169	-154.221	-151.966	-157.121	-161.285	-156.288	-160.7	-160.984			64.1	-154.417	-156.188	-159.134	-157.301	-155.621	-156.243	-158.71	-157.179	-155.32	-159.231	-158.369	-158.023	-156.431	-159.432	-161.819	-161.029	-157.786	-156.211			64.1	-154.712	-154.65	-155.198	-152.717	-153.938	-155.133	-153.832
64.2	-149.591	-152.472	-148.811	-153.371	-152.149	-156.682	-150.296	-147.628	-151.291	-149.359	-151.37	-153.989	-151.384	-156.956	-161.193	-156.547	-160.99	-160.169			64.2	-154.661	-156.055	-159.403	-157.549	-155.734	-156.517	-158.473	-157.213	-155.232	-158.923	-158.16	-158.38	-156.492	-159.315	-161.378	-160.899	-157.914	-155.858			64.2	-154.449	-153.941	-154.687	-152.86	-154.497	-154.896	-153.716
64.3	-149.634	-152.943	-149.598	-153.624	-152.231	-155.755	-150.184	-147.662	-152.684	-148.534	-152.114	-153.381	-150.984	-157.303	-160.632	-156.832	-160.618	-159.505			64.3	-154.401	-155.913	-158.691	-157.217	-155.748	-156.16	-158.453	-156.66	-155.728	-158.508	-157.915	-158.894	-157.004	-158.777	-161.115	-160.465	-157.635	-155.473			64.3	-153.92	-153.29	-154.4	-153.032	-154.937	-154.473	-153.685
64.4	-149.482	-153.144	-150.541	-153.557	-152.449	-154.017	-150.374	-147.671	-153.248	-147.764	-152.743	-153.238	-150.822	-158.046	-159.272	-156.252	-160.314	-159.431			64.4	-153.708	-155.82	-157.559	-156.672	-155.469	-155.726	-158.49	-156.239	-156.54	-157.969	-157.957	-159.17	-157.519	-158.495	-161.247	-160.185	-157.507	-155.649			64.4	-153.214	-152.677	-154.378	-153.388	-154.806	-154.238	-153.546
64.5	-149.758	-152.464	-150.766	-153.256	-152.383	-152.307	-150.97	-147.747	-152.607	-147.493	-152.512	-153.639	-150.495	-158.11	-157.692	-155.377	-160.553	-159.995			64.5	-153.092	-156.134	-156.641	-156.854	-155.33	-155.815	-158.275	-156.416	-157.054	-157.469	-158.465	-159.016	-157.372	-158.708	-161.709	-159.962	-157.77	-156.069			64.5	-152.788	-152.387	-154.7	-153.866	-154.297	-154.57	-153.94
64.6	-150.323	-151.377	-150.212	-152.869	-151.603	-151.634	-151.308	-148.322	-151.745	-148.267	-151.886	-153.967	-149.644	-157.357	-156.958	-155.131	-160.655	-160.873			64.6	-152.955	-156.536	-156.373	-157.718	-155.719	-156.076	-158.07	-156.71	-157.133	-157.445	-159.11	-158.573	-156.528	-158.899	-162.364	-159.495	-158.028	-156.013			64.6	-152.971	-152.967	-155.076	-154.028	-154.084	-155.284	-154.83
64.7	-150.592	-150.873	-149.654	-152.373	-150.278	-151.814	-151.086	-149.196	-151.562	-149.812	-151.724	-154.24	-148.484	-156.765	-157.666	-155.962	-160.06	-161.315			64.7	-153.175	-156.497	-156.677	-158.091	-156.204	-155.912	-157.983	-156.745	-157.061	-157.693	-159.297	-158.05	-155.611	-158.694	-162.707	-158.966	-158.037	-155.776			64.7	-153.464	-154.125	-155.344	-153.591	-154.49	-155.644	-155.242
64.8	-150.556	-150.725	-149.567	-152.213	-149.42	-152.297	-150.485	-149.805	-151.682	-150.786	-152.066	-155.112	-147.476	-156.711	-159.357	-157.233	-159.308	-161.092			64.8	-153.34	-156.104	-157.278	-157.53	-156.208	-155.582	-158.031	-156.657	-156.953	-157.864	-158.871	-157.739	-155.414	-158.254	-162.275	-158.781	-158.005	-155.92			64.8	-153.794	-154.569	-155.615	-152.873	-155.144	-155.147	-154.976
64.9	-150.194	-150.257	-149.612	-152.488	-149.817	-153.093	-150.191	-150.043	-151.605	-150.482	-152.435	-156.153	-147.025	-156.973	-160.654	-157.753	-158.911	-160.834			64.9	-153.368	-155.524	-157.962	-156.942	-155.797	-155.734	-158.401	-156.302	-156.653	-158.001	-158.174	-157.71	-156.27	-157.89	-161.409	-158.974	-157.809	-156.141			64.9	-153.873	-154.085	-155.986	-152.357	-155.37	-154.202	-154.73
65	-149.23	-150.039	-149.482	-152.634	-150.824	-154.191	-150.613	-149.923	-151.259	-149.722	-152.652	-156.089	-147.919	-157.209	-160.718	-157.381	-158.858	-160.717			65	-153.454	-154.903	-158.394	-156.969	-155.304	-156.298	-158.987	-155.652	-156.156	-157.951	-157.629	-157.73	-157.489	-157.691	-160.814	-159.196	-157.099	-156.119			65	-153.738	-153.822	-156.159	-152.365	-154.896	-153.787	-154.644
65.1	-148.079	-150.599	-149.404	-152.85	-151.127	-154.868	-151.196	-149.519	-150.902	-149.382	-152.548	-155.066	-150.057	-157.146	-160.031	-156.888	-159.079	-160.284			65.1	-153.368	-154.724	-158.431	-157.502	-155.007	-156.822	-159.513	-155.309	-155.823	-157.601	-157.559	-157.701	-158.111	-157.676	-160.803	-159.293	-156.293	-156.1			65.1	-153.579	-154.286	-155.736	-152.848	-153.976	-154.218	-154.376
65.2	-147.729	-151.796	-149.572	-153.426	-150.581	-154.523	-151.741	-149.155	-151.208	-149.081	-151.945	-154.506	-151.827	-157.026	-159.566	-156.551	-159.357	-159.648			65.2	-152.796	-155.091	-158.527	-158.273	-155.212	-157.28	-159.945	-155.621	-155.845	-157.314	-157.946	-157.619	-158.228	-157.971	-161.149	-159.267	-156.082	-156.199			65.2	-153.594	-154.881	-155.178	-153.372	-153.153	-154.8	-154.189
65.3	-148.465	-153.243	-149.537	-153.582	-150.128	-153.913	-152.564	-149.008	-152.153	-148.643	-151.122	-154.96	-152.446	-157.208	-159.918	-156.136	-159.496	-159.126			65.3	-152.304	-155.452	-158.941	-158.719	-155.656	-157.693	-160.495	-156.156	-156.136	-157.339	-158.42	-157.571	-158.515	-158.291	-161.568	-159.01	-156.573	-156.18			65.3	-153.509	-155.105	-154.933	-153.614	-152.904	-154.83	-154.296
65.4	-149.489	-153.92	-148.818	-153.001	-150.383	-153.81	-153.202	-149.066	-152.437	-148.978	-150.317	-155.484	-152.493	-157.596	-160.767	-155.759	-159.793	-158.512			65.4	-152.449	-155.67	-159.099	-158.53	-155.631	-157.807	-160.974	-156.527	-156.782	-157.716	-158.688	-157.692	-158.801	-157.944	-161.947	-158.465	-157.359	-155.952			65.4	-153.011	-155.053	-154.718	-153.447	-153.1	-154.352	-154.15
65.5	-150.211	-153.096	-147.969	-152.243	-151.151	-153.357	-152.799	-149.31	-151.341	-150.126	-149.763	-155.014	-152.158	-157.978	-161.314	-155.751	-160.507	-158.41			65.5	-152.924	-156.228	-158.524	-158.247	-155.271	-157.537	-160.766	-156.82	-157.421	-158.366	-158.606	-157.835	-158.592	-157.183	-162.076	-157.815	-157.845	-155.775			65.5	-152.55	-155.007	-154.737	-152.872	-153.087	-154.133	-153.634
65.6	-150.864	-151.655	-148.049	-151.767	-151.476	-152.158	-151.593	-149.598	-149.795	-151.018	-150.157	-154.096	-151.242	-158.268	-160.969	-155.913	-161.128	-159.581			65.6	-153.468	-157.023	-157.49	-158.208	-155.386	-157.116	-159.875	-157.206	-157.389	-159.088	-158.137	-157.971	-158.213	-157.225	-161.815	-157.537	-157.874	-155.762			65.6	-152.884	-154.977	-155.081	-152.172	-152.879	-154.541	-153.424
65.7	-151.099	-151.13	-149.178	-151.796	-150.836	-151.699	-150.607	-149.676	-148.802	-151.095	-151.495	-154.148	-150.044	-158.24	-159.816	-155.679	-161.253	-160.916			65.7	-153.944	-157.084	-156.614	-157.983	-155.988	-156.579	-158.851	-157.73	-157.253	-159.619	-157.622	-158.298	-158.126	-158.394	-161.395	-158.106	-157.877	-155.654			65.7	-153.793	-154.972	-154.979	-151.739	-153.312	-154.833	-153.681
65.8	-150.541	-152.006	-150.191	-152.294	-150.24	-152.658	-150.117	-149.295	-148.531	-150.501	-152.55	-154.961	-149.059	-157.513	-158.833	-155.341	-161.332	-161.119			65.8	-153.864	-155.991	-156.436	-157.54	-156.454	-155.807	-157.893	-157.919	-157.747	-159.708	-157.568	-158.536	-158.182	-159.69	-161.177	-159.121	-158.268	-155.395			65.8	-154.338	-154.955	-154.341	-151.874	-154.478	-154.324	-153.954
65.9	-150.094	-153.583	-150.3	-152.77	-150.76	-153.747	-149.838	-148.686	-148.71	-149.645	-152.849	-155.056	-148.503	-156.273	-158.95	-155.755	-161.54	-160.673			65.9	-152.952	-154.594	-157.143	-157.304	-156.522	-154.993	-157.197	-157.317	-158.067	-159.544	-157.882	-158.355	-158.259	-160.207	-161.235	-159.73	-158.898	-155.448			65.9	-154.211	-154.769	-153.97	-152.558	-155.426	-153.707	-154.141
66	-150.392	-154.743	-150.212	-152.808	-151.844	-154.043	-149.946	-148.317	-149.104	-149.107	-153.131	-154.367	-148.564	-155.595	-159.616	-156.78	-161.383	-160.406			66	-151.785	-153.976	-158.326	-156.967	-156.248	-154.633	-157.23	-156.275	-157.28	-159.481	-158.286	-157.857	-158.208	-159.914	-161.364	-159.853	-159.124	-155.828			66	-153.985	-154.419	-154.127	-153.364	-155.588	-154.05	-154.259
66.1	-150.885	-154.687	-150.511	-152.265	-152.288	-154.116	-150.646	-148.165	-149.869	-149.148	-153.378	-153.846	-149.436	-156.2	-159.688	-157.435	-160.734	-160.198			66.1	-151.228	-154.588	-159.084	-156.395	-155.904	-154.964	-158.023	-155.432	-155.906	-159.382	-158.922	-157.174	-157.712	-159.428	-161.258	-160.086	-158.622	-155.923			66.1	-154	-154.005	-154.319	-153.959	-155.171	-155.133	-153.941
66.2	-151.046	-153.413	-150.768	-151.508	-152.12	-154.722	-151.522	-148.071	-151.168	-149.431	-152.763	-153.89	-150.793	-157.033	-159.185	-157.134	-159.95	-159.749			66.2	-151.444	-155.843	-158.845	-156.498	-155.93	-155.696	-159.082	-155.12	-154.929	-158.946	-159.582	-156.706	-157.25	-159.333	-160.864	-160.565	-157.612	-155.625			66.2	-153.783	-153.807	-154.329	-154.569	-154.801	-155.891	-153.237
66.3	-151.315	-151.801	-150.535	-151.445	-152.023	-155.347	-151.83	-148.082	-152.055	-149.661	-151.457	-154.446	-151.922	-156.758	-158.979	-156.325	-159.28	-159.479			66.3	-152.046	-156.638	-157.876	-157.525	-156.172	-156.376	-159.832	-155.348	-154.512	-158.515	-159.825	-156.948	-157.547	-159.436	-160.438	-160.964	-156.723	-155.412			66.3	-153.177	-154.222	-154.69	-155.2	-154.835	-155.782	-152.871
66.4	-151.985	-150.963	-149.941	-152.215	-152.229	-154.741	-151.564	-148.279	-151.46	-149.859	-150.513	-155.17	-152.322	-156.006	-159.248	-155.932	-158.708	-159.806			66.4	-152.862	-156.472	-156.96	-158.389	-155.916	-156.682	-160.016	-155.756	-154.355	-158.471	-159.77	-157.571	-158.238	-159.216	-160.238	-161.104	-156.682	-155.614			66.4	-152.754	-154.885	-155.503	-155.289	-154.968	-155.169	-153.047
66.5	-152.264	-151.101	-149.547	-152.884	-152.63	-153.143	-151.402	-148.473	-150.184	-150.167	-150.282	-155.355	-152.013	-156.192	-159.329	-156.124	-158.135	-160.195			66.5	-153.601	-155.882	-156.616	-158.517	-155.339	-156.622	-159.731	-155.856	-154.411	-158.461	-159.608	-157.843	-158.339	-158.941	-160.606	-160.857	-157.386	-156.046			66.5	-152.813	-155.04	-155.808	-154.563	-154.776	-154.743	-153.245
66.6	-151.494	-151.925	-149.623	-152.709	-152.634	-152.069	-151.946	-148.735	-149.882	-150.549	-150.405	-154.772	-151.545	-157.222	-159.228	-156.373	-157.864	-160.018			66.6	-153.636	-155.575	-156.838	-158.48	-155.306	-156.549	-159.163	-155.374	-154.833	-158.096	-159.134	-157.876	-157.597	-159.096	-161.409	-160.3	-157.978	-156.313			66.6	-153.304	-154.985	-155.121	-153.388	-154.108	-154.76	-153.133
66.7	-150.128	-153.271	-149.969	-151.898	-151.896	-152.179	-153.262	-149.255	-150.589	-150.766	-150.783	-154.271	-151.406	-157.729	-159.647	-156.408	-158.191	-159.761			66.7	-152.982	-155.476	-157.463	-158.625	-155.769	-156.885	-158.668	-154.617	-155.397	-157.63	-158.212	-158.264	-156.868	-159.387	-161.942	-159.616	-158.1	-156.36			66.7	-153.873	-155.352	-154.502	-152.272	-153.274	-155.006	-152.801
66.8	-148.864	-154.462	-150.403	-151.164	-151.13	-153.15	-154.434	-149.659	-151.235	-150.362	-151.019	-154.332	-151.191	-157.036	-160.24	-156.255	-158.905	-160.014			66.8	-152.416	-155.372	-158.117	-158.436	-156.017	-157.426	-158.629	-154.326	-155.685	-157.441	-157.211	-158.871	-156.851	-159.246	-161.885	-158.988	-158.121	-156.328			66.8	-154.135	-155.704	-154.68	-151.792	-152.774	-155.04	-152.396
66.9	-148.055	-154.6	-150.358	-150.879	-150.943	-154.366	-154.342	-149.428	-151.47	-149.164	-150.427	-154.543	-150.522	-155.971	-160.169	-156.381	-159.613	-160.115			66.9	-152.503	-155.371	-158.41	-157.803	-155.911	-157.443	-158.933	-154.652	-155.733	-157.442	-156.705	-159.138	-157.356	-158.635	-161.554	-158.784	-158.162	-156.363			66.9	-154.213	-155.495	-154.73	-152.174	-152.832	-154.51	-152.178
67	-148.126	-154.047	-149.289	-151.241	-150.872	-155.117	-153.362	-148.611	-151.484	-148.061	-149.654	-154.714	-149.94	-155.498	-159.538	-156.82	-160.113	-159.481			67	-152.848	-155.476	-158.382	-157.281	-155.866	-157.014	-159.268	-155.238	-155.742	-157.695	-156.839	-158.956	-157.981	-158.082	-161.501	-158.982	-157.973	-156.539			67	-154.263	-155.206	-153.92	-152.896	-153.565	-153.645	-152.536
67.1	-149.267	-153.887	-147.937	-152.278	-150.463	-155.142	-152.519	-147.918	-151.633	-148.165	-150.116	-155.161	-150.022	-155.35	-158.914	-156.59	-160.437	-158.939			67.1	-152.88	-155.678	-158.207	-157.083	-155.976	-156.765	-159.57	-155.914	-155.777	-158.355	-157.277	-158.663	-158.439	-158.083	-162.002	-159.254	-157.732	-156.738			67.1	-154.382	-155.401	-153.093	-153.353	-154.907	-153.18	-153.31
67.2	-150.615	-154.165	-147.562	-153.06	-150.037	-154.626	-151.888	-147.946	-151.929	-149.12	-151.662	-155.717	-150.38	-155.133	-158.541	-155.699	-160.646	-159.073			67.2	-152.781	-156.044	-157.89	-157.235	-156.211	-156.746	-159.626	-156.455	-155.91	-158.93	-157.724	-158.726	-158.443	-158.611	-162.645	-159.568	-157.795	-156.924			67.2	-154.539	-155.731	-153.401	-153.213	-156.168	-153.517	-153.891
67.3	-151.13	-154.478	-148.351	-152.888	-150.129	-153.672	-151.388	-148.639	-152.061	-149.87	-152.618	-155.613	-150.423	-155.534	-158.464	-154.975	-160.631	-159.608			67.3	-152.983	-156.493	-157.484	-157.726	-156.697	-156.661	-159.028	-156.531	-156.107	-159.001	-158.072	-159.168	-158.049	-159.343	-162.795	-159.773	-158.08	-157.01			67.3	-154.357	-155.776	-154.762	-152.627	-156.678	-154.374	-154.229
67.4	-151	-154.666	-149.238	-152.427	-150.849	-152.789	-151.276	-149.491	-152.079	-150.344	-152.342	-154.902	-150.396	-156.858	-158.736	-154.748	-160.179	-160.344			67.4	-153.589	-156.702	-157.237	-158.183	-157.178	-156.395	-158.094	-156.223	-156.297	-158.877	-158.212	-159.302	-157.717	-159.991	-162.339	-159.483	-158.416	-156.484			67.4	-154.02	-155.461	-155.957	-152.053	-156.509	-155.064	-154.4
67.5	-150.647	-154.453	-149.464	-152.222	-151.759	-152.814	-151.373	-149.991	-151.862	-150.954	-151.801	-154.573	-150.685	-157.873	-159.129	-155.023	-159.453	-161.226			67.5	-154.633	-156.272	-157.367	-158.493	-157.097	-156.14	-157.638	-155.867	-156.448	-158.879	-157.961	-158.862	-157.786	-160.399	-161.969	-158.794	-158.722	-155.422			67.5	-154.17	-154.877	-156.247	-151.617	-156.09	-155.143	-154.091
67.6	-149.684	-154.081	-149.662	-151.998	-152.268	-153.637	-151.918	-150.164	-151.082	-151.35	-151.807	-154.834	-151.037	-157.327	-159.332	-155.413	-159.163	-162.092			67.6	-155.739	-155.479	-157.57	-159.037	-156.517	-156.123	-157.546	-155.668	-156.298	-158.746	-157.157	-158.705	-158.058	-160.41	-162.268	-158.438	-158.839	-154.911			67.6	-154.808	-154.522	-155.675	-151.398	-155.481	-154.974	-153.432
67.7	-148.218	-154.115	-150.197	-151.589	-152.324	-154.359	-153.235	-150.136	-150.251	-150.832	-152.243	-155.343	-151.145	-155.734	-159.424	-155.63	-159.536	-162.609			67.7	-155.948	-155.077	-157.398	-159.713	-155.919	-156.16	-157.271	-155.721	-155.802	-158.339	-156.221	-159.454	-158.196	-160.051	-162.718	-158.6	-158.643	-155.548			67.7	-155.232	-154.677	-154.511	-151.694	-154.653	-155.037	-153.094
67.8	-147.678	-154.197	-150.471	-151.233	-152.092	-154.163	-154.207	-149.473	-150.172	-149.47	-152.35	-156.119	-151.095	-154.805	-159.492	-156.204	-159.783	-162.366			67.8	-154.915	-155.098	-156.965	-159.759	-155.402	-156.095	-157.046	-155.812	-155.38	-158.225	-156.136	-160.405	-158.174	-159.694	-162.651	-158.685	-158.231	-156.458			67.8	-154.824	-155.09	-153.461	-152.295	-154.124	-155.095	-153.383
67.9	-148.837	-153.567	-149.972	-151.321	-151.673	-153.149	-153.845	-148.23	-150.779	-148.266	-151.643	-156.495	-151.128	-154.91	-159.304	-157.311	-159.202	-161.356			67.9	-153.608	-155.267	-156.751	-158.794	-155.048	-156.121	-157.456	-155.659	-155.364	-158.654	-157.058	-160.656	-158.025	-159.296	-162.373	-158.781	-157.824	-156.491			67.9	-154.027	-155.361	-153.167	-152.537	-154.292	-154.806	-154.125
68	-150.385	-152.575	-148.888	-152.124	-151.357	-152.799	-152.716	-147.345	-151.167	-148.095	-150.561	-155.656	-151.091	-154.956	-159.171	-158.162	-158.438	-160.188			68	-152.934	-155.627	-157.068	-157.333	-155.347	-156.241	-158.385	-155.459	-155.537	-159.181	-157.994	-160.192	-157.861	-158.719	-162.188	-159.417	-157.622	-155.773			68	-153.65	-155.146	-153.41	-152.409	-154.7	-154.57	-154.861
68.1	-150.873	-152.229	-148.142	-153.478	-151.21	-153.761	-151.786	-147.015	-151.051	-148.786	-149.748	-154.37	-150.785	-155.039	-159.699	-158.452	-158.604	-159.6			68.1	-152.761	-155.911	-157.512	-156.487	-156.38	-156.361	-159.109	-155.6	-155.662	-159.532	-158.153	-159.562	-157.935	-158.405	-161.723	-160.173	-157.945	-155.287			68.1	-153.553	-154.609	-153.678	-152.58	-154.764	-154.769	-155.056
68.2	-150.264	-152.606	-148.531	-154.735	-151.051	-154.375	-151.527	-146.934	-150.913	-149.567	-149.526	-153.886	-150.51	-156.235	-160.525	-158.725	-159.208	-159.943			68.2	-152.565	-155.77	-157.549	-156.868	-157.362	-156.608	-159.359	-156.105	-155.994	-159.612	-157.76	-159.159	-158.102	-158.565	-160.904	-160.209	-158.762	-155.503			68.2	-153.455	-154.347	-154.019	-153.222	-154.331	-154.831	-154.776
68.3	-149.28	-152.932	-149.478	-154.988	-150.966	-153.775	-151.667	-147.48	-150.626	-150.116	-149.914	-154.039	-150.55	-158.092	-161.062	-158.773	-159.126	-160.858			68.3	-152.271	-155.477	-157.324	-157.876	-157.686	-156.872	-159.518	-156.58	-156.672	-159.294	-157.564	-159.042	-158.072	-158.878	-160.277	-159.403	-159.399	-155.962			68.3	-153.447	-154.55	-154.551	-153.664	-153.694	-154.394	-154.522
68.4	-148.668	-152.844	-150.163	-154.006	-150.988	-153.157	-151.472	-148.734	-149.973	-150.671	-150.36	-154.38	-150.665	-158.769	-161.132	-157.975	-158.432	-161.513			68.4	-152.467	-155.564	-156.925	-158.718	-157.594	-156.819	-159.66	-156.551	-157.211	-158.877	-157.934	-159.172	-158.103	-159.037	-160.268	-158.369	-159.488	-155.893			68.4	-153.387	-154.912	-154.699	-153.328	-153.485	-154.091	-154.322
68.5	-148.555	-152.873	-150.752	-152.587	-150.887	-153.568	-150.941	-149.859	-149.746	-151.193	-150.396	-154.973	-150.406	-157.527	-160.621	-157.01	-157.901	-161.454			68.5	-153.345	-155.904	-156.131	-158.971	-157.27	-156.374	-159.415	-156.081	-157.173	-158.556	-158.309	-159.213	-158.379	-158.86	-161.002	-158.006	-159.255	-155.514			68.5	-153.258	-155.21	-154.123	-152.664	-153.912	-154.261	-153.885
68.6	-148.483	-153.524	-151.175	-151.592	-150.63	-154.662	-150.846	-150.006	-150.36	-151.091	-150.508	-155.653	-149.836	-155.543	-159.682	-156.628	-158.067	-160.879			68.6	-154.05	-155.871	-155.391	-158.645	-156.464	-155.849	-158.919	-155.942	-156.947	-158.311	-158.267	-158.753	-158.507	-158.243	-162.131	-158.484	-158.905	-155.714			68.6	-153.447	-155.459	-153.6	-152.579	-154.562	-154.525	-153.434
68.7	-148.164	-154.475	-150.738	-151.293	-150.557	-155.251	-151.346	-149.066	-151.215	-150.098	-151.167	-156.28	-149.686	-154.328	-158.929	-156.584	-158.922	-160.271			68.7	-153.883	-155.441	-155.388	-158.237	-155.569	-155.763	-158.629	-156.348	-157.095	-158.359	-158.181	-157.97	-158.266	-157.308	-162.773	-159.092	-158.364	-156.434			68.7	-154.196	-155.851	-153.794	-153.217	-154.898	-154.97	-153.583
68.8	-147.672	-154.896	-149.554	-151.577	-150.91	-154.643	-151.903	-147.982	-152.086	-149.166	-151.431	-156.715	-149.876	-154.385	-158.794	-156.553	-160.046	-160.257			68.8	-153.136	-155.15	-156.084	-158.112	-155.343	-156.16	-158.537	-156.429	-157.461	-158.533	-158.178	-157.394	-157.941	-156.399	-162.429	-159.54	-157.576	-156.956			68.8	-154.952	-156.294	-153.978	-153.856	-154.686	-155.778	-154.39
68.9	-147.486	-154.538	-148.66	-152.129	-151.129	-153.163	-152.6	-147.748	-152.688	-149.365	-150.274	-156.657	-149.592	-155.115	-158.892	-156.533	-160.917	-160.869			68.9	-152.514	-155.187	-157.22	-158.121	-155.714	-156.644	-158.53	-156.096	-157.571	-158.502	-158.006	-157.541	-157.787	-155.871	-161.809	-160.023	-157.002	-157.177			68.9	-155.04	-156.149	-153.247	-153.737	-154.498	-156.266	-155.036
69	-148.281	-153.748	-148.375	-152.425	-150.54	-151.725	-153.69	-147.936	-152.162	-150.242	-148.773	-156.154	-149.318	-155.711	-158.905	-156.401	-161.094	-161.268			69	-152.329	-155.356	-158.515	-157.926	-155.904	-156.958	-158.8	-156.055	-157.409	-158.51	-157.654	-158.405	-157.851	-155.794	-161.714	-160.27	-157.227	-157.339			69	-154.601	-155.256	-152.097	-152.892	-154.985	-156.138	-154.63
69.1	-149.781	-152.628	-148.301	-152.366	-149.974	-151.23	-154.287	-147.756	-150.648	-150.785	-148.801	-155.641	-149.794	-156.127	-159.153	-156.109	-160.762	-160.808			69.1	-152.595	-155.43	-159.182	-157.508	-155.525	-156.764	-159.216	-156.311	-157.232	-158.741	-157.328	-159.255	-158.124	-156.174	-161.944	-160.029	-157.92	-157.393			69.1	-154.125	-154.404	-151.632	-152.14	-155.594	-156.011	-153.223
69.2	-150.527	-151.566	-148.699	-152.171	-150.445	-152.126	-153.719	-147.439	-149.707	-151.095	-150.252	-155.472	-150.405	-156.631	-159.8	-156.197	-160.442	-159.998			69.2	-153.399	-155.459	-158.842	-157.176	-155.009	-155.947	-159.183	-156.44	-157.062	-158.966	-157.259	-159.445	-158.456	-156.907	-161.88	-159.586	-158.062	-157.12			69.2	-153.939	-154.166	-152.09	-152.178	-155.431	-156.016	-152.053
69.3	-149.866	-151.523	-149.672	-151.542	-151.173	-153.921	-152.749	-147.238	-150.197	-151.572	-151.266	-155.731	-150.607	-157.076	-160.371	-156.674	-160.11	-159.904			69.3	-154.457	-155.792	-158.249	-157.034	-154.825	-155.192	-158.765	-156.22	-156.92	-159.182	-157.323	-159.074	-158.727	-157.52	-161.345	-159.237	-157.386	-156.28			69.3	-154.12	-154.301	-152.992	-152.735	-154.706	-155.788	-152.216
69.4	-148.955	-152.747	-150.233	-150.484	-151.223	-155.308	-152.041	-147.075	-151.292	-151.631	-150.989	-156.148	-150.672	-157.314	-160.213	-156.607	-159.939	-160.547			69.4	-155.102	-156.575	-157.931	-156.876	-154.864	-155.097	-158.606	-155.789	-157.042	-159.435	-157.3	-158.638	-158.89	-157.874	-160.923	-158.953	-156.675	-155.159			69.4	-154.461	-154.585	-153.958	-153.066	-154.049	-155.395	-153.324
69.5	-148.953	-154.028	-149.803	-149.767	-151.412	-155.463	-151.438	-147.408	-151.963	-150.854	-150.605	-155.932	-150.786	-157.175	-159.563	-156.252	-160.171	-160.933			69.5	-155.221	-157.193	-157.734	-156.835	-154.926	-155.419	-158.741	-155.577	-157.392	-159.532	-157.303	-158.472	-158.798	-158.08	-161.149	-158.803	-156.667	-154.708			69.5	-154.273	-155.07	-154.819	-152.929	-153.55	-155.095	-154.166
69.6	-149.795	-154.223	-149.318	-149.789	-152.588	-155.007	-150.898	-148.139	-152.188	-149.872	-151.252	-154.736	-150.85	-156.502	-159.615	-156.728	-160.23	-160.721			69.6	-155.257	-156.78	-157.558	-157.236	-155.096	-155.691	-158.771	-155.892	-157.585	-159.436	-157.452	-158.352	-158.616	-158.053	-161.518	-159.053	-157.235	-155.323			69.6	-153.044	-155.669	-155.477	-152.716	-153.147	-154.732	-154.246
69.7	-151.109	-153.685	-149.603	-150.688	-153.89	-155.093	-150.791	-148.353	-152.129	-149.298	-152.223	-153.518	-150.764	-155.75	-160.65	-157.823	-159.756	-160.405			69.7	-155.189	-155.605	-157.276	-157.829	-155.462	-155.831	-158.679	-156.535	-157.531	-159.438	-157.719	-157.987	-158.729	-158.115	-161.337	-159.48	-157.9	-156.354			69.7	-151.782	-156.072	-155.636	-152.711	-153.084	-154.177	-154.091
69.8	-152.495	-153.275	-149.859	-152.238	-154.019	-155.372	-151.004	-147.934	-151.55	-149.12	-152.078	-153.221	-150.634	-155.281	-161.432	-158.694	-159.231	-160.115			69.8	-154.681	-154.973	-156.888	-158.082	-155.801	-155.968	-158.555	-156.907	-157.615	-159.681	-158.158	-157.744	-159.214	-158.486	-160.881	-159.779	-158.479	-157.108			69.8	-151.783	-155.97	-155.167	-152.684	-153.746	-153.974	-154.345
69.9	-153.356	-153.343	-149.336	-153.377	-152.831	-154.577	-151.122	-147.47	-150.59	-149.243	-150.872	-153.627	-150.834	-154.905	-161.028	-159.087	-159.177	-159.717			69.9	-154.009	-155.157	-156.794	-158.038	-155.894	-155.942	-158.258	-156.754	-157.962	-160.077	-158.661	-158.041	-159.74	-158.828	-160.805	-160.119	-158.953	-157.436			69.9	-152.826	-155.562	-154.592	-152.683	-154.851	-154.72	-154.735
70	-153.479	-153.815	-148.685	-153.438	-151.284	-152.938	-151.517	-147.447	-150.116	-149.731	-149.867	-154.222	-151.495	-154.748	-160.138	-158.913	-159.544	-159.618			70	-153.631	-155.22	-157.208	-158.046	-156.087	-155.406	-157.89	-156.453	-158.046	-160.386	-158.848	-158.453	-159.666	-159.033	-161.115	-160.329	-159.245	-157.2			70	-153.866	-155.402	-154.223	-152.879	-155.634	-156.128	-154.507
70.1	-152.423	-154.359	-148.696	-152.885	-150.259	-151.88	-152.503	-147.754	-150.352	-150.438	-149.476	-154.762	-152.078	-155.258	-159.886	-158.552	-159.998	-160.035			70.1	-153.326	-154.853	-157.765	-158.147	-156.43	-154.697	-157.869	-156.505	-157.534	-160.276	-158.771	-158.365	-158.821	-159.013	-161.29	-159.976	-159.231	-156.465			70.1	-154.281	-155.678	-153.846	-152.936	-155.866	-156.971	-153.809
70.2	-150.399	-154.782	-149.189	-152.258	-149.983	-151.895	-153.338	-148.012	-150.418	-151.18	-149.609	-154.972	-151.767	-156.273	-159.904	-158.482	-160.298	-160.4			70.2	-152.644	-154.615	-157.952	-158.08	-156.193	-154.539	-158.596	-156.895	-156.885	-159.79	-158.831	-158.054	-157.962	-158.573	-161.119	-159.301	-158.772	-155.957			70.2	-153.999	-156.05	-153.542	-152.899	-155.913	-156.318	-153.421
70.3	-149.088	-155.087	-149.706	-151.704	-150.147	-152.346	-153.182	-148.255	-150.163	-151.842	-150.369	-154.784	-150.799	-156.88	-159.389	-158.374	-160.27	-160.446			70.3	-151.811	-155.017	-157.67	-157.802	-155.216	-154.948	-159.765	-157.05	-156.783	-159.261	-158.9	-158.086	-157.785	-157.886	-160.986	-158.909	-158.171	-156.108			70.3	-153.482	-156.009	-153.521	-153.352	-155.877	-154.804	-153.456
70.4	-149.215	-155.079	-150.267	-151.402	-150.279	-152.913	-152.212	-148.744	-150.23	-151.983	-151.157	-154.408	-150.455	-156.573	-158.9	-157.724	-159.842	-160.823			70.4	-151.416	-155.83	-157.249	-157.64	-154.335	-155.353	-160.298	-156.703	-157.19	-158.896	-158.604	-158.385	-158.314	-157.126	-161.287	-159.131	-158.067	-156.635			70.4	-153.511	-155.434	-153.949	-154.226	-155.472	-153.792	-153.583
70.5	-149.769	-154.582	-150.854	-151.58	-150.324	-153.593	-151.192	-149.684	-150.428	-151.351	-151.208	-154.163	-150.993	-155.929	-159.18	-156.663	-159.386	-161.766			70.5	-151.365	-156.361	-156.859	-157.923	-154.272	-155.451	-159.865	-156.173	-157.56	-158.647	-158.14	-158.515	-159.146	-156.509	-161.845	-159.886	-158.161	-157.108			70.5	-154.27	-154.903	-154.672	-154.808	-154.811	-153.795	-153.856
70.6	-149.752	-154.068	-150.943	-152.249	-150.537	-154.004	-150.994	-150.711	-150.323	-150.347	-150.959	-154.445	-151.374	-155.939	-160.085	-156.124	-159.375	-162.391			70.6	-151.335	-156.41	-156.556	-158.465	-154.988	-155.408	-159.4	-155.924	-157.629	-158.446	-158.067	-158.328	-159.585	-156.59	-162.186	-160.606	-157.721	-157.166			70.6	-155.077	-154.855	-154.865	-154.707	-154.282	-154.323	-154.32
70.7	-149.28	-153.965	-150.452	-153.154	-150.649	-153.974	-151.717	-151.121	-150.168	-149.392	-151.241	-155.26	-150.989	-156.661	-161.346	-156.734	-159.627	-162.2			70.7	-151.62	-156.109	-156.724	-158.49	-155.846	-155.459	-159.633	-156.265	-157.382	-158.586	-158.216	-157.981	-159.208	-157.402	-162.123	-160.664	-157.203	-156.807			70.7	-155.475	-154.997	-154.375	-154.146	-153.834	-154.727	-154.654
70.8	-149.482	-153.659	-149.811	-153.571	-150.497	-153.685	-152.192	-150.739	-150.176	-148.693	-151.874	-155.974	-150.197	-157.009	-162.4	-157.673	-159.375	-161.561			70.8	-152.571	-155.615	-157.435	-157.642	-156.281	-155.711	-160.086	-156.83	-156.96	-159.141	-158.06	-157.462	-158.549	-158.171	-161.641	-160.044	-157.43	-156.374			70.8	-155.501	-154.774	-153.992	-153.597	-153.635	-154.746	-154.638
70.9	-150.569	-152.829	-149.211	-153.06	-150.727	-153.187	-151.784	-150.039	-150.302	-148.521	-152.087	-156.044	-149.861	-156.262	-162.447	-157.731	-158.381	-160.54			70.9	-153.858	-155.323	-158.135	-156.833	-156.472	-156.011	-159.911	-157.089	-156.614	-159.447	-157.703	-156.653	-158.217	-158.433	-161.14	-159.367	-158.276	-156.109			70.9	-154.975	-153.78	-153.928	-153.637	-154.221	-154.433	-154.269
71	-151.103	-152.507	-148.965	-152.254	-151.723	-152.636	-151.368	-149.404	-150.707	-149.017	-151.719	-155.742	-150.214	-155.035	-161.41	-156.743	-157.551	-159.604			71	-154.583	-155.356	-158.33	-157.092	-156.723	-156.202	-159.135	-157.205	-156.397	-159.127	-157.455	-156.133	-158.16	-158.541	-161.264	-159.072	-159.062	-156.093			71	-153.916	-152.519	-153.843	-154.466	-155.188	-154.191	-153.903
71.1	-150.539	-152.874	-149.343	-152.057	-152.85	-152.69	-151.405	-148.635	-151.07	-149.811	-151.334	-155.669	-150.688	-154.442	-159.905	-155.79	-157.724	-159.738			71.1	-154.262	-155.482	-158.136	-158.057	-156.777	-156.398	-158.483	-157.288	-156.467	-158.585	-157.472	-156.438	-158.243	-158.79	-161.795	-159.056	-159.29	-156.362			71.1	-153.227	-152.089	-153.659	-155.35	-155.658	-154.406	-154.072
71.2	-149.912	-153.025	-149.818	-152.721	-153.225	-153.619	-151.298	-147.901	-150.927	-150.151	-151.513	-155.711	-151.086	-154.814	-158.911	-155.816	-158.292	-160.663			71.2	-153.411	-155.793	-157.789	-158.73	-156.344	-156.407	-158.216	-157.001	-156.985	-158.12	-157.62	-157.175	-158.565	-158.84	-162.144	-159.305	-159.014	-156.85			71.2	-153.866	-152.644	-153.493	-155.449	-155.656	-154.895	-154.695
71.3	-149.851	-153.093	-149.535	-153.37	-152.667	-154.209	-151.061	-147.909	-150.908	-149.99	-151.555	-155.393	-151.511	-155.571	-159.069	-156.588	-158.417	-161.458			71.3	-153.026	-156.17	-157.279	-158.741	-155.653	-155.876	-158.173	-156.538	-157.492	-157.674	-157.657	-157.837	-159.089	-158.525	-162.285	-159.994	-158.667	-157.364			71.3	-155.337	-153.48	-153.506	-154.931	-155.53	-155.253	-155.198
71.4	-150.415	-153.369	-148.636	-152.839	-151.759	-153.48	-151.399	-148.69	-151.694	-150.172	-150.622	-154.72	-151.557	-156.216	-159.885	-157.421	-158.499	-161.847			71.4	-153.5	-155.848	-156.959	-158.356	-155.039	-155.069	-158.226	-156.463	-157.426	-157.362	-157.741	-158.404	-159.644	-158.33	-162.214	-160.705	-158.651	-157.55			71.4	-156.345	-154.016	-153.677	-154.349	-155.212	-155.275	-155.037
71.5	-151.591	-153.578	-147.987	-151.467	-151.105	-152.427	-152.327	-149.623	-152.63	-150.978	-149.558	-154	-151.142	-156.615	-160.401	-157.872	-158.947	-161.844			71.5	-154.214	-154.872	-157.363	-158.151	-154.674	-154.509	-158.2	-156.662	-157.109	-157.436	-157.988	-158.784	-160.079	-158.448	-161.9	-160.662	-159.084	-157.314			71.5	-156.322	-154.276	-153.782	-153.759	-154.581	-154.982	-154.435
71.6	-152.354	-153.841	-147.69	-150.255	-150.873	-152.368	-153.005	-150.48	-152.574	-151.696	-149.271	-153.332	-150.905	-156.614	-160.478	-157.703	-159.323	-161.638			71.6	-154.616	-154.351	-158.205	-158.438	-154.743	-154.229	-158.022	-156.719	-157.055	-157.658	-158.087	-158.637	-160.015	-158.616	-161.541	-159.974	-159.436	-157.09			71.6	-155.772	-154.629	-153.838	-153.151	-153.868	-154.567	-154.127
71.7	-151.642	-154.107	-147.58	-149.648	-150.956	-153.417	-152.909	-151.068	-151.724	-151.74	-149.502	-152.901	-151.234	-156.189	-160.556	-157.224	-159.439	-161.471			71.7	-154.763	-154.698	-158.633	-158.74	-155.154	-153.828	-157.69	-156.64	-157.193	-157.58	-157.793	-158.253	-159.35	-158.817	-161.281	-159.446	-159.096	-157.161			71.7	-155.365	-155.196	-153.879	-152.649	-153.703	-154.207	-154.06
71.8	-150.437	-153.993	-148.288	-150.394	-151.356	-154.534	-152.498	-150.867	-151.238	-151.217	-150.074	-153.165	-151.859	-155.401	-160.609	-157.148	-159.437	-161.528			71.8	-154.818	-155.339	-158.355	-158.474	-155.435	-153.354	-157.147	-156.648	-157.17	-157.278	-157.135	-158.257	-158.573	-159.003	-161.339	-159.389	-158.396	-157.204			71.8	-155.121	-155.597	-153.927	-152.401	-154.319	-154.159	-153.817
71.9	-150.319	-153.67	-149.783	-152.263	-151.783	-154.382	-152.242	-150.097	-151.276	-150.658	-150.718	-154.012	-152.333	-154.38	-160.502	-157.771	-159.319	-161.826			71.9	-155.013	-155.572	-157.853	-157.909	-155.653	-153.483	-156.626	-156.703	-156.701	-157.152	-156.591	-158.58	-158.048	-159.122	-161.727	-159.424	-158.005	-156.91			71.9	-154.807	-155.368	-154.014	-152.699	-154.935	-154.451	-153.591
72	-151.007	-153.61	-150.566	-153.344	-151.525	-152.996	-151.884	-149.291	-151.286	-150.423	-150.63	-154.563	-152.445	-153.894	-160.251	-158.563	-159.237	-162.001			72	-155.227	-155.157	-157.514	-157.798	-156.401	-154.347	-156.599	-156.51	-155.975	-157.247	-156.838	-158.648	-157.902	-159.318	-161.89	-159.442	-157.812	-156.482			72	-154.503	-154.683	-154.012	-153.372	-154.719	-154.439	-153.753
72.1	-151.307	-153.881	-150.012	-152.9	-150.663	-151.872	-151.397	-148.45	-151.149	-150.407	-149.984	-154.258	-151.933	-154.441	-159.547	-159.042	-159.554	-161.698			72.1	-155.066	-154.642	-157.121	-158.222	-157.334	-155.15	-157.308	-156.076	-155.505	-157.329	-157.593	-158.059	-158.05	-159.249	-161.523	-159.793	-157.573	-156.356			72.1	-154.37	-154.276	-153.976	-153.926	-153.769	-154.025	-154.357
72.2	-151.13	-154.188	-149.485	-151.927	-150.305	-151.882	-151.283	-147.656	-151.221	-150.44	-149.812	-153.532	-151.151	-155.13	-158.519	-159.341	-160.104	-161.142			72.2	-154.678	-154.655	-156.796	-158.445	-157.456	-155.267	-158.408	-155.781	-155.257	-157.559	-158.132	-157.264	-158.118	-158.591	-160.768	-160.344	-157.555	-156.548			72.2	-154.278	-154.344	-153.975	-154.373	-152.845	-154.067	-154.876
72.3	-151.048	-154.49	-149.67	-150.944	-151.09	-152.507	-151.605	-147.44	-151.768	-150.478	-150.215	-153.319	-151.303	-155.224	-158.05	-159.666	-160.049	-160.774			72.3	-154.397	-155.207	-157.107	-157.988	-156.939	-155.088	-159.266	-155.893	-154.913	-158.259	-158.609	-157.084	-157.968	-158.052	-160.057	-160.462	-157.677	-156.693			72.3	-154.217	-154.43	-153.83	-154.727	-152.646	-154.637	-154.886
72.4	-151.434	-154.653	-149.649	-150.479	-152.11	-153.128	-152.029	-148.24	-152.26	-150.598	-150.605	-153.863	-152.586	-155.278	-158.569	-159.964	-159.288	-160.565			72.4	-154.213	-156.018	-157.809	-157.3	-156.667	-155.377	-159.692	-156.414	-154.728	-159.188	-159.266	-157.478	-157.838	-158.258	-159.981	-160.196	-157.376	-156.555			72.4	-154.603	-154.143	-153.635	-154.66	-153.351	-154.952	-154.845
72.5	-152.344	-154.297	-149.303	-151.245	-152.216	-153.788	-152.436	-149.532	-152.014	-151.049	-150.873	-154.436	-153.626	-155.678	-159.65	-159.98	-158.824	-160.502			72.5	-154.144	-156.684	-158.264	-157.111	-156.627	-156.096	-159.749	-156.994	-155.262	-159.744	-159.765	-157.969	-157.783	-158.598	-160.537	-160.17	-156.882	-156.137			72.5	-155.332	-153.549	-153.747	-154.36	-154.557	-154.702	-155.15
72.6	-152.85	-153.795	-149.373	-152.553	-151.894	-154.553	-152.526	-150.169	-151.429	-151.397	-151.158	-154.38	-153.12	-155.907	-160.361	-159.343	-159.397	-160.917			72.6	-154.132	-156.875	-158.334	-157.535	-156.518	-156.406	-159.402	-156.914	-156.407	-159.623	-159.827	-158.47	-157.788	-158.358	-161.24	-160.427	-157.016	-155.843			72.6	-155.597	-153.215	-153.961	-154.297	-155.434	-154.056	-155.365
72.7	-152.022	-153.675	-149.658	-153.109	-152.096	-154.863	-152.089	-149.857	-151.281	-150.84	-151.349	-154.048	-151.346	-156.042	-160.157	-158.392	-160.506	-161.74			72.7	-153.995	-156.555	-157.952	-158.049	-156.187	-155.945	-158.879	-156.045	-157.484	-158.969	-159.334	-158.941	-157.815	-158.085	-161.9	-160.488	-157.631	-156.225			72.7	-155.14	-153.329	-153.887	-154.373	-155.487	-153.453	-155.035
72.8	-150.581	-153.44	-149.56	-152.475	-152.676	-154.069	-151.646	-149.273	-151.46	-149.939	-151.255	-153.888	-150.06	-156.631	-159.6	-158.138	-161.123	-162.104			72.8	-153.746	-156.048	-157.21	-158.281	-155.473	-155.288	-158.451	-155.335	-158.029	-158.279	-158.542	-159.128	-157.91	-158.529	-162.365	-160.281	-157.855	-157.037			72.8	-154.347	-153.237	-153.64	-154.269	-154.944	-153.504	-154.486
72.9	-149.996	-152.87	-149.078	-151.606	-152.984	-152.642	-151.911	-148.831	-151.29	-149.971	-150.992	-153.592	-150.572	-157.218	-159.143	-158.296	-160.795	-161.641			72.9	-153.514	-155.846	-156.667	-158.224	-154.876	-155.246	-158.208	-155.695	-157.758	-158.049	-158.113	-158.483	-158.216	-159.274	-162.312	-159.932	-157.593	-157.278			72.9	-153.455	-152.876	-153.478	-153.891	-154.133	-154.248	-154.154
73	-150.389	-152.739	-148.779	-151.791	-152.774	-151.966	-152.618	-148.806	-150.529	-151.003	-151.115	-153.057	-152.152	-156.98	-158.771	-157.721	-159.577	-161.059			73	-153.331	-155.991	-156.59	-157.936	-155.041	-155.92	-158.021	-156.683	-156.875	-158.374	-158.159	-156.859	-158.473	-159.655	-161.86	-159.445	-157.398	-156.381			73	-152.622	-152.872	-153.486	-153.444	-153.514	-154.867	-153.896
73.1	-150.749	-153.482	-149.385	-152.434	-152.445	-152.501	-152.814	-149.512	-150.018	-151.806	-151.798	-153.039	-153.179	-155.742	-158.932	-156.954	-158.069	-160.752			73.1	-153.399	-156.283	-156.532	-157.313	-155.814	-156.466	-157.575	-157.138	-156.215	-158.912	-158.332	-155.386	-158.392	-159.647	-161.601	-159.149	-157.57	-154.971			73.1	-152.042	-153.209	-153.671	-153.338	-153.818	-154.685	-153.805
73.2	-150.838	-154.501	-150.57	-152.232	-152.284	-153.299	-152.615	-150.258	-150.502	-151.633	-152.228	-154	-153.073	-154.022	-159.541	-157.007	-157.237	-160.31			73.2	-153.84	-156.727	-156.263	-156.418	-156.586	-156.196	-157.034	-156.84	-155.95	-158.99	-158.536	-155.15	-158.118	-159.453	-161.612	-159.195	-157.897	-154.271			73.2	-151.843	-153.644	-153.853	-153.597	-154.966	-154.109	-154.57
73.3	-150.907	-154.754	-151.128	-151.647	-152.078	-153.361	-152.783	-150.263	-151.498	-151.093	-151.92	-155.302	-152.309	-153.093	-159.954	-157.327	-157.486	-159.691			73.3	-154.235	-157.017	-156.115	-155.658	-156.803	-155.288	-157.136	-156.476	-155.481	-158.25	-158.694	-155.651	-157.87	-159.175	-161.441	-159.266	-157.827	-154.648			73.3	-152.257	-154.025	-153.957	-153.782	-155.944	-153.956	-156.09
73.4	-150.492	-153.904	-150.797	-151.544	-151.906	-152.888	-152.726	-150.216	-151.919	-150.807	-151.501	-156.192	-151.827	-153.756	-160.275	-157.437	-158.678	-159.593			73.4	-154.146	-156.958	-156.218	-155.568	-156.253	-154.378	-157.967	-156.412	-154.689	-157.408	-158.655	-156.186	-157.907	-158.867	-161.143	-159.281	-157.398	-155.309			73.4	-153.228	-153.807	-154.138	-153.714	-156.273	-154.261	-156.989
73.5	-149.696	-152.921	-150.209	-151.609	-152.035	-152.752	-151.799	-150.884	-151.209	-150.74	-151.294	-156.799	-152.119	-155.203	-160.564	-157.61	-159.959	-160.412			73.5	-153.792	-156.93	-156.371	-156.234	-155.241	-154.189	-158.655	-156.58	-154.328	-157.616	-158.549	-156.941	-158.179	-158.664	-160.981	-159.161	-157.435	-155.822			73.5	-154.234	-152.821	-154.274	-153.524	-156.347	-154.413	-156.39
73.6	-149.625	-152.6	-149.937	-151.314	-152.152	-152.937	-150.96	-151.766	-150.011	-150.726	-150.842	-157.122	-152.281	-156.304	-160.492	-157.983	-160.159	-161.321			73.6	-153.557	-157.209	-156.377	-156.871	-154.338	-155.056	-158.552	-156.929	-155.039	-158.473	-158.647	-157.8	-158.296	-158.709	-160.77	-158.817	-158.199	-156.239			73.6	-154.759	-152.03	-154.008	-153.219	-156.073	-153.985	-155.021
73.7	-150.479	-152.462	-150.298	-150.913	-151.875	-153.004	-150.829	-151.97	-149.356	-150.491	-150.102	-156.424	-151.516	-156.84	-160.181	-158.674	-159.494	-161.338			73.7	-153.424	-157.696	-156.23	-156.875	-154.05	-156.376	-157.918	-157.086	-156.177	-158.752	-159.018	-158.257	-158.223	-158.855	-160.458	-158.627	-158.844	-156.349			73.7	-154.766	-152.388	-153.338	-153.057	-154.951	-153.132	-154.007
73.8	-151.692	-152.283	-150.688	-150.844	-151.346	-152.886	-151.028	-151.534	-149.366	-149.991	-149.693	-154.858	-150.501	-156.77	-159.804	-159.725	-159.119	-160.753			73.8	-153.268	-157.976	-156.128	-156.59	-154.594	-157.003	-157.42	-156.807	-156.561	-158.583	-159.385	-158.37	-158.054	-158.931	-160.435	-158.978	-158.669	-156.042			73.8	-154.407	-153.508	-152.839	-153.445	-153.56	-152.438	-153.485
73.9	-153.214	-152.461	-150.345	-151.045	-150.977	-152.55	-151.46	-150.869	-149.602	-149.799	-149.839	-153.426	-149.948	-155.957	-159.276	-160.543	-159.22	-160.343			73.9	-153.171	-158.06	-156.12	-156.579	-155.478	-156.644	-157.391	-156.593	-156.157	-158.616	-159.414	-158.275	-157.929	-159.107	-160.84	-159.59	-158.064	-155.79			73.9	-153.573	-154.306	-152.838	-154.094	-153.082	-152.628	-153.076
74	-154.617	-153.014	-149.71	-151.443	-150.756	-151.999	-151.912	-150.066	-150.086	-150.062	-150.165	-152.74	-149.823	-155.006	-158.904	-160.402	-158.988	-160.551			74	-153.071	-158.302	-156.101	-157.114	-156.043	-156.14	-157.653	-156.753	-155.826	-158.705	-159.063	-157.772	-158.079	-159.495	-161.359	-159.954	-157.694	-156.034			74	-152.486	-154.218	-153.011	-154.35	-153.781	-153.922	-152.901
74.1	-155.048	-153.558	-149.548	-152.06	-150.644	-151.371	-151.648	-149.618	-150.7	-150.228	-150.613	-153.15	-149.968	-154.583	-158.928	-159.793	-158.371	-161.295			74.1	-152.908	-158.223	-156.09	-157.936	-156.354	-155.75	-158.122	-156.928	-155.929	-158.55	-158.492	-157.244	-158.347	-159.752	-161.668	-160	-157.683	-156.288			74.1	-151.883	-153.496	-152.916	-154.231	-154.84	-155.332	-152.911
74.2	-154.326	-153.697	-149.894	-152.619	-150.939	-151.016	-150.853	-150.186	-150.622	-150.201	-151.134	-154.396	-150.354	-154.44	-158.897	-159.385	-158.146	-161.718			74.2	-153.013	-157.374	-156.179	-158.497	-156.765	-154.972	-158.716	-156.942	-155.999	-158.325	-157.798	-157.15	-158.404	-159.559	-161.532	-159.985	-157.952	-155.937			74.2	-151.9	-152.83	-152.415	-154.101	-155.433	-155.537	-152.547
74.3	-152.745	-153.573	-150.525	-152.439	-151.488	-151.327	-150.511	-151.323	-149.675	-150.242	-151.34	-155.303	-151.163	-153.944	-158.739	-158.819	-158.349	-161.148			74.3	-153.58	-156.485	-156.388	-158.649	-157.383	-154.101	-159.029	-156.827	-155.608	-158.256	-157.139	-157.238	-158.168	-159.15	-160.973	-160.058	-158.386	-155.243			74.3	-152.12	-152.844	-152.224	-153.9	-155.495	-154.687	-152.004
74.4	-150.801	-153.757	-151.043	-151.322	-152.068	-152.125	-150.656	-152.033	-148.797	-150.071	-151.446	-155.294	-152.42	-153.154	-159.158	-158.278	-158.53	-160.125			74.4	-154.058	-156.248	-156.75	-158.489	-158.177	-154.084	-159.015	-156.566	-154.958	-158.183	-156.755	-157.265	-157.807	-159.038	-160.401	-160.108	-158.544	-154.845			74.4	-152.562	-153.619	-152.877	-153.476	-155.22	-154.171	-152.112
74.5	-149.523	-154.17	-150.882	-150.749	-152.624	-152.907	-150.795	-152.391	-148.792	-149.599	-152.053	-155.058	-153.474	-153.033	-159.964	-158.44	-158.629	-159.467			74.5	-153.832	-156.165	-157.238	-158.027	-158.809	-155.053	-159.097	-156.485	-154.484	-158.03	-156.675	-157.236	-157.69	-159.216	-160.267	-160.012	-158.232	-154.881			74.5	-153.457	-154.639	-153.36	-153.115	-154.58	-154.5	-152.99
74.6	-149.257	-154.457	-150.216	-151.817	-152.788	-153.59	-151.193	-152.585	-149.836	-149.559	-153.066	-154.893	-153.473	-153.97	-160.136	-158.843	-158.538	-159.362			74.6	-152.98	-155.747	-157.494	-157.666	-158.898	-156.375	-159.373	-157.015	-154.581	-157.874	-156.876	-157.234	-157.991	-159.236	-160.596	-160.03	-157.985	-155.015			74.6	-154.514	-155.097	-152.679	-152.952	-153.931	-154.831	-154.018
74.7	-149.417	-154.799	-149.884	-153.255	-152.563	-153.989	-152.173	-152.292	-151.128	-150.509	-153.696	-154.426	-152.366	-154.902	-159.483	-158.653	-158.024	-159.885			74.7	-151.97	-155.761	-157.169	-157.714	-158.418	-157.398	-159.554	-157.739	-155.288	-157.647	-157.623	-157.447	-158.394	-159.129	-160.972	-160.23	-158.248	-155.048			74.7	-155.227	-154.695	-151.733	-152.715	-154.02	-154.791	-154.812
74.8	-149.859	-155.174	-150.311	-153.524	-152.433	-153.479	-153.296	-151.888	-151.496	-151.79	-153.504	-153.823	-151.203	-155.033	-158.475	-157.882	-157.326	-160.685			74.8	-151.345	-156.811	-156.47	-157.824	-157.563	-157.692	-159.41	-157.745	-156.023	-157.432	-158.887	-157.865	-158.511	-159.287	-160.899	-160.239	-158.84	-155.027			74.8	-155.229	-153.984	-151.993	-152.572	-154.614	-154.679	-155.215
74.9	-150.612	-155.162	-150.911	-152.722	-152.28	-152.375	-153.836	-151.98	-150.963	-151.956	-152.574	-153.603	-150.584	-154.825	-157.724	-156.847	-156.927	-161.036			74.9	-151.355	-158.136	-155.982	-157.772	-156.718	-157.453	-158.958	-157.056	-156.39	-157.565	-159.859	-158.325	-158.402	-159.669	-160.477	-159.948	-159.386	-155.281			74.9	-154.487	-153.484	-153.165	-153.008	-154.73	-154.097	-154.864
75	-151.089	-154.512	-150.691	-151.84	-151.544	-151.969	-153.393	-152.32	-150.469	-150.782	-151.481	-154.236	-150.134	-154.958	-157.692	-156.028	-156.972	-160.998			75	-151.581	-158.631	-156.039	-157.671	-156.133	-157.198	-158.39	-156.684	-156.651	-157.964	-159.949	-158.749	-158.232	-159.875	-160.243	-159.558	-159.508	-156.164			75	-153.773	-153.386	-153.726	-153.559	-154.157	-153.168	-154.022
75.1	-150.975	-153.459	-149.766	-151.587	-150.708	-152.36	-152.285	-152.275	-150.717	-149.672	-151.052	-155.584	-150.042	-155.43	-158.258	-156.238	-157.23	-160.995			75.1	-151.52	-158.063	-156.178	-157.629	-155.614	-157.005	-158.005	-157.159	-156.982	-158.122	-159.282	-158.921	-158.093	-159.79	-160.29	-159.242	-159.09	-157.049			75.1	-153.802	-153.706	-153.427	-153.406	-153.641	-153.128	-153.69
75.2	-150.738	-152.698	-149.208	-151.786	-150.64	-152.502	-151.206	-151.678	-151.732	-149.51	-151.204	-156.397	-150.758	-155.912	-158.683	-157.463	-157.462	-160.888			75.2	-151.113	-157.05	-155.964	-157.916	-155.214	-156.899	-157.865	-158.006	-157.084	-157.755	-158.287	-158.734	-158.192	-159.563	-160.375	-159.043	-158.592	-157.071			75.2	-154.035	-154.189	-153.34	-153.151	-153.851	-154.221	-154.245
75.3	-150.791	-152.463	-149.101	-152.006	-150.724	-152.303	-150.538	-151.334	-152.561	-149.883	-151.509	-156.016	-151.478	-156.407	-158.436	-158.534	-158.053	-160.793			75.3	-150.547	-156.236	-155.773	-158.307	-155.381	-156.994	-157.731	-158.617	-156.755	-157.203	-157.542	-158.577	-158.449	-159.435	-160.704	-158.95	-158.337	-156.471			75.3	-153.867	-154.731	-153.88	-153.583	-154.589	-155.416	-155.079
75.4	-150.861	-152.213	-148.687	-152.294	-150.135	-152.445	-150.359	-151.855	-152.266	-149.999	-151.961	-155.188	-151.373	-156.852	-157.933	-158.978	-159.235	-160.955			75.4	-150.267	-156	-156.133	-157.761	-155.996	-157.064	-157.636	-158.788	-156.236	-157.146	-157.381	-158.637	-158.308	-159.549	-161.532	-159.093	-158.369	-155.934			75.4	-153.593	-155.106	-154.468	-154.087	-155.282	-155.929	-155.345
75.5	-150.249	-151.687	-148.12	-152.533	-149.627	-153.241	-150.789	-152.397	-151.289	-149.484	-152.196	-154.647	-150.711	-156.915	-157.804	-159.495	-160.071	-160.841			75.5	-150.812	-156.318	-157.111	-156.311	-156.553	-156.987	-157.741	-158.444	-156.044	-157.605	-157.486	-158.63	-157.545	-159.55	-162.435	-159.477	-158.83	-155.662			75.5	-153.453	-154.917	-154.575	-154.083	-155.795	-155.98	-154.974
75.6	-149.104	-151.264	-147.992	-151.965	-150.294	-154.59	-151.799	-152.321	-150.692	-148.89	-152.104	-154.33	-150.107	-156.628	-158.171	-160.352	-159.932	-160.004			75.6	-151.781	-156.54	-158.019	-155.535	-156.82	-156.852	-158.007	-157.576	-156.359	-157.942	-157.423	-158.618	-156.909	-159.203	-162.572	-159.938	-159.36	-155.432			75.6	-153.31	-154.408	-154.305	-153.913	-155.961	-156.054	-154.622
75.7	-148.842	-151.39	-148.375	-150.668	-151.679	-155.58	-152.861	-152.291	-150.911	-148.96	-152.264	-154.055	-150.134	-156.375	-158.621	-160.635	-159.409	-158.952			75.7	-152.229	-156.069	-158.115	-156.241	-156.892	-156.488	-158.338	-156.465	-156.724	-158.001	-157.25	-158.723	-156.975	-159.047	-161.706	-160.303	-159.523	-155.18			75.7	-153.144	-154.231	-154.107	-153.662	-155.405	-156.004	-154.621
75.8	-150.003	-151.83	-148.792	-150.005	-152.353	-155.45	-153.369	-152.464	-151.644	-149.04	-152.788	-154.093	-150.994	-156.554	-158.473	-159.641	-158.63	-158.509			75.8	-152.286	-155.181	-157.651	-157.457	-157.137	-156.126	-158.559	-155.707	-156.845	-158.169	-157.498	-158.487	-157.333	-159.372	-160.875	-160.469	-159.403	-155.029			75.8	-153.083	-154.723	-154.148	-153.136	-154.53	-155.581	-154.756
75.9	-151.381	-152.272	-148.746	-150.349	-151.902	-154.899	-153.195	-152.004	-152.113	-148.441	-152.849	-154.662	-152.059	-157.231	-157.889	-157.952	-157.36	-158.852			75.9	-152.481	-154.556	-157.171	-158.089	-157.603	-156.536	-158.615	-155.788	-156.861	-158.475	-158.26	-157.826	-157.503	-159.508	-160.867	-160.428	-159.082	-154.971			75.9	-153.17	-155.449	-154.353	-152.555	-154.069	-155.2	-154.719
76	-152.207	-153.033	-148.58	-150.778	-151.093	-154.68	-152.483	-151.143	-152.114	-148.366	-152.183	-155.337	-152.554	-157.864	-157.807	-156.743	-156.524	-159.481			76	-152.964	-154.494	-156.735	-158.173	-157.633	-157.468	-158.592	-156.512	-156.898	-158.536	-158.856	-157.465	-157.669	-159.105	-161.02	-160.197	-158.737	-155.218			76	-153.156	-155.544	-154.738	-152.367	-153.849	-155.225	-154.365
76.1	-152.487	-154.028	-149.041	-151.061	-150.356	-154.345	-151.621	-150.876	-152.232	-149.403	-151.959	-155.463	-152.325	-157.89	-158.319	-156.66	-157.077	-160.165			76.1	-153.807	-155.058	-156.31	-158.098	-156.871	-157.89	-158.493	-157.065	-157.156	-158.323	-158.962	-157.691	-158.127	-158.903	-160.59	-159.859	-158.659	-155.685			76.1	-152.879	-154.75	-155.162	-152.716	-153.533	-155.244	-153.926
76.2	-152.366	-154.397	-149.872	-151.568	-149.641	-153.582	-151.214	-151.342	-152.331	-149.846	-152.835	-154.742	-151.645	-157.586	-158.685	-157.5	-158.413	-161.005			76.2	-154.317	-156.046	-156.048	-157.949	-156.053	-157.804	-158.236	-156.922	-157.608	-158.115	-158.882	-158.053	-158.453	-159.2	-159.903	-159.74	-158.79	-155.668			76.2	-152.709	-153.705	-155.43	-153.297	-153.561	-154.991	-153.724
76.3	-152.212	-153.743	-150.161	-151.906	-149.384	-152.868	-151.044	-151.98	-151.65	-148.908	-153.691	-153.785	-150.825	-157.653	-158.657	-158.672	-159.249	-161.646			76.3	-153.514	-156.78	-156.264	-157.918	-156.14	-157.711	-157.907	-156.51	-157.82	-157.915	-158.732	-158.347	-158.149	-159.224	-159.734	-159.754	-158.783	-155.06			76.3	-153.017	-153.023	-155.347	-153.735	-154.032	-154.83	-153.792
76.4	-152.087	-152.711	-149.917	-151.602	-149.844	-152.473	-150.705	-152.103	-150.396	-148.138	-153.646	-153.518	-150.045	-158.044	-158.648	-159.492	-159.323	-161.776			76.4	-151.789	-156.908	-156.844	-158.02	-157.072	-157.453	-157.902	-156.678	-157.695	-157.689	-158.44	-158.617	-157.728	-158.746	-160.211	-159.282	-158.397	-154.59			76.4	-153.573	-152.666	-154.687	-153.879	-154.253	-154.841	-154.147
76.5	-151.864	-152.382	-149.804	-151.049	-150.658	-152.412	-150.892	-151.441	-149.311	-148.753	-153.219	-153.98	-149.437	-158.285	-158.801	-159.603	-159.275	-161.759			76.5	-150.738	-156.725	-157.145	-157.801	-157.856	-156.823	-158.35	-157.473	-157.495	-157.589	-158.044	-158.627	-158.023	-158.438	-160.729	-158.46	-157.928	-154.743			76.5	-153.936	-152.304	-153.816	-153.836	-153.862	-154.969	-154.782
76.6	-151.387	-153.023	-149.618	-150.97	-151.509	-152.519	-151.97	-150.637	-148.905	-150.127	-152.855	-154.498	-149.487	-158.431	-158.933	-159.226	-159.401	-161.69			76.6	-151.111	-156.476	-156.872	-157.172	-157.87	-156.268	-158.758	-157.743	-157.243	-157.493	-157.564	-158.323	-158.882	-158.585	-160.976	-158.099	-157.889	-155.162			76.6	-154.044	-152.064	-153.515	-153.904	-153.224	-155.26	-155.274
76.7	-150.666	-153.887	-148.883	-151.289	-152.253	-152.707	-153.147	-150.62	-149.365	-151.222	-152.285	-154.965	-150.595	-158.595	-159.103	-158.735	-159.509	-161.351			76.7	-152.104	-156.21	-156.306	-156.545	-157.387	-156.273	-158.581	-156.96	-156.961	-157.114	-157.315	-158.105	-159.377	-158.813	-161.205	-158.396	-158.13	-155.344			76.7	-154.058	-152.55	-153.846	-154.194	-153.096	-155.378	-155.237
76.8	-150.478	-154.177	-148.361	-151.039	-152.845	-153.25	-153.55	-151.298	-150.26	-151.643	-151.741	-155.397	-151.91	-158.647	-159.23	-158.568	-159.294	-160.994			76.8	-152.659	-156.268	-155.747	-156.327	-156.869	-156.568	-157.909	-156.129	-156.752	-156.872	-157.679	-158.093	-159.083	-158.941	-161.342	-159.035	-158.033	-155.538			76.8	-153.782	-153.921	-154.254	-154.419	-153.914	-154.919	-154.916
76.9	-151.173	-153.477	-148.835	-150.32	-152.915	-153.877	-153.107	-151.722	-150.928	-151.513	-151.755	-155.077	-152.319	-158.123	-158.891	-158.909	-158.919	-160.908			76.9	-152.571	-156.812	-155.416	-156.585	-156.636	-156.864	-157.435	-156.189	-156.521	-157.278	-158.28	-157.984	-158.483	-159.099	-160.996	-159.595	-157.587	-156.126			76.9	-152.829	-155.367	-154.655	-154.257	-154.926	-154.065	-154.743
77	-151.817	-152.358	-149.542	-150.141	-152.151	-153.673	-152.154	-151.286	-151.246	-151.189	-151.84	-154.194	-152.186	-156.519	-158.306	-159.226	-159.025	-160.932			77	-152.17	-157.32	-155.564	-156.944	-156.71	-157.294	-157.708	-156.698	-156.258	-157.991	-158.612	-157.829	-158.102	-159.326	-160.262	-159.703	-157.465	-156.884			77	-151.733	-155.898	-155.179	-153.687	-155.047	-153.525	-154.989
77.1	-151.683	-152.116	-149.72	-150.213	-151.313	-152.543	-151.027	-150.16	-151.337	-151.013	-151.374	-154.281	-152.196	-154.87	-158.292	-159.095	-159.661	-160.879			77.1	-151.673	-157.284	-156.108	-157.011	-156.43	-157.471	-158.5	-156.434	-156.041	-158.45	-158.839	-158.076	-158.042	-159.414	-159.789	-159.369	-157.862	-157.387			77.1	-151.461	-155.237	-155.242	-152.934	-154.361	-153.883	-155.391
77.2	-150.988	-152.987	-149.745	-149.784	-151.138	-151.592	-150.319	-149.172	-151.125	-151.126	-150.732	-155.392	-152.038	-154.727	-159.046	-158.838	-160.12	-160.923			77.2	-151.243	-156.974	-156.646	-156.889	-155.306	-157.027	-158.932	-155.376	-155.873	-158.535	-159.25	-158.751	-158.319	-159.21	-159.98	-158.789	-158.292	-157.527			77.2	-152.156	-154.006	-154.45	-152.451	-153.717	-155.021	-155.347
77.3	-150.263	-153.779	-150.201	-149.224	-151.276	-151.534	-150.235	-149.27	-150.664	-151.288	-150.445	-155.784	-151.556	-155.729	-159.712	-158.759	-160.094	-161.164			77.3	-151.242	-156.966	-157.076	-156.947	-154.208	-156.507	-158.476	-154.706	-155.937	-158.332	-159.785	-159.334	-158.711	-159.05	-160.624	-158.32	-158.354	-157.386			77.3	-153.028	-153.322	-153.636	-152.52	-153.658	-156.186	-154.943
77.4	-150.008	-153.605	-151.096	-149.187	-151.409	-151.92	-150.305	-150.209	-150.477	-151.025	-150.431	-154.85	-151.313	-156.724	-159.547	-158.955	-159.949	-161.561			77.4	-151.887	-157.21	-157.406	-157.262	-154.275	-156.312	-157.512	-155.015	-156.49	-157.92	-160.053	-159.385	-158.546	-159.298	-161.319	-158.473	-158.117	-157.113			77.4	-153.24	-153.741	-153.606	-153.016	-153.843	-156.507	-154.687
77.5	-150.361	-152.83	-151.72	-149.701	-151.447	-152.329	-150.182	-150.862	-151.029	-150.095	-150.442	-153.662	-151.291	-157.494	-158.762	-159.216	-159.594	-161.95			77.5	-152.693	-157.199	-157.576	-157.664	-155.07	-156.235	-156.762	-155.851	-157.254	-157.692	-159.647	-159.127	-157.777	-159.622	-161.665	-159.024	-158.098	-156.75			77.5	-152.927	-154.778	-154.027	-153.748	-153.51	-155.704	-154.639
77.6	-151.254	-152.186	-151.39	-150.529	-151.11	-152.718	-149.919	-150.907	-151.966	-148.806	-150.681	-153.193	-150.712	-158.135	-158.342	-159.222	-158.637	-161.779			77.6	-152.798	-156.924	-157.707	-157.976	-155.346	-156.091	-156.543	-156.506	-157.714	-158.089	-158.71	-159.22	-157.187	-159.371	-161.298	-159.121	-158.607	-156.208			77.6	-152.81	-155.552	-153.951	-154.209	-152.772	-154.485	-154.468
77.7	-152.786	-151.992	-150.698	-151.415	-150.737	-153.081	-150.004	-150.852	-152.674	-148.182	-151.381	-153.343	-149.684	-158.589	-159.001	-159.522	-157.531	-161.004			77.7	-152.27	-156.898	-157.787	-158.077	-155.018	-155.661	-156.655	-156.554	-157.842	-158.546	-157.782	-159.595	-157.134	-158.627	-160.36	-158.636	-159.168	-155.801			77.7	-152.942	-155.414	-153.278	-154.14	-152.548	-153.712	-154.052
77.8	-154.436	-152.061	-150.53	-151.96	-150.871	-153.506	-150.727	-150.876	-152.944	-148.691	-152.593	-153.557	-149.338	-159.151	-159.845	-160.472	-157.135	-160.459			77.8	-151.859	-157.304	-157.773	-158.014	-154.944	-155.075	-156.837	-156.169	-157.811	-158.028	-157.325	-159.449	-157.371	-158.283	-159.603	-158.179	-159.222	-155.954			77.8	-152.762	-154.472	-152.998	-153.927	-153.253	-153.305	-153.908
77.9	-155.042	-152.058	-150.441	-152.117	-151.148	-154.062	-151.558	-150.877	-152.511	-149.324	-153.975	-153.788	-150.239	-159.868	-159.836	-161.105	-157.794	-160.436			77.9	-151.766	-157.643	-157.998	-158.114	-155.362	-154.927	-156.962	-155.747	-157.653	-156.797	-157.502	-158.652	-157.738	-158.666	-159.494	-158.198	-158.784	-156.571			77.9	-152.332	-153.491	-153.42	-153.791	-154.282	-152.981	-154.407
78	-154.158	-152.299	-149.895	-152.286	-151.11	-154.476	-151.861	-151.205	-151.52	-149.463	-154.517	-154.014	-151.676	-160.081	-159.474	-161.056	-158.993	-160.518			78	-151.58	-157.393	-158.305	-158.384	-155.66	-155.239	-156.871	-155.229	-157.646	-156.289	-158.01	-157.76	-158.119	-159.167	-159.79	-158.647	-158.279	-157.39			78	-152.409	-153.042	-154.014	-153.738	-154.85	-153.356	-155.131
78.1	-152.367	-152.986	-149.538	-152.271	-150.906	-154.526	-151.783	-151.727	-150.905	-149.513	-153.675	-154.061	-152.512	-159.476	-159.086	-160.957	-159.573	-160.573			78.1	-151.072	-156.539	-158.083	-158.17	-155.348	-155.526	-156.715	-154.671	-157.881	-157.157	-158.323	-157.151	-158.073	-159.35	-160.128	-159.191	-158.05	-158.016			78.1	-153.282	-153.206	-154.722	-153.665	-154.92	-154.704	-155.589
78.2	-150.538	-153.762	-149.825	-151.689	-150.713	-154.299	-151.668	-151.588	-151.143	-149.544	-152.327	-154.175	-152.199	-158.422	-158.564	-160.644	-159.131	-160.976			78.2	-150.658	-155.354	-157.462	-157.247	-154.781	-155.718	-156.894	-154.597	-157.697	-158.46	-158.195	-157.082	-157.378	-159.143	-160.277	-159.465	-158.016	-157.905			78.2	-154.153	-153.739	-155.387	-153.172	-154.724	-155.856	-155.705
78.3	-149.353	-154.442	-150.312	-151.148	-150.425	-154.031	-151.604	-150.721	-151.518	-149.412	-151.407	-154.67	-151.315	-157.366	-158.308	-159.868	-158.652	-161.777			78.3	-150.818	-154.129	-157.114	-156.445	-154.74	-155.907	-157.334	-155.123	-156.842	-158.799	-157.869	-157.7	-156.486	-158.638	-160.354	-159.394	-158.096	-157.207			78.3	-154.165	-154.003	-155.382	-152.36	-154.283	-155.917	-155.706
78.4	-149.198	-154.772	-150.804	-151.463	-149.88	-153.861	-151.713	-150.015	-151.281	-149.348	-150.783	-155.478	-150.928	-156.562	-158.497	-159.241	-158.81	-162.205			78.4	-151.486	-153.385	-157.383	-156.554	-155.289	-155.977	-157.656	-155.877	-156.003	-157.996	-157.875	-158.574	-156.097	-158.333	-160.696	-159.345	-158.321	-156.521			78.4	-153.606	-153.671	-154.851	-152.103	-153.878	-155.384	-155.851
78.5	-149.965	-154.84	-151.256	-152.357	-149.453	-153.584	-151.883	-149.958	-150.773	-149.385	-150.379	-155.989	-151.111	-156.199	-158.893	-159.128	-159.29	-161.906			78.5	-152.127	-153.336	-158.056	-157.454	-155.841	-156.149	-157.816	-156.586	-155.74	-157.182	-158.263	-158.715	-156.332	-158.515	-161.343	-159.434	-158.416	-156.082			78.5	-153.312	-153.287	-154.608	-152.656	-153.868	-154.635	-156.091
78.6	-151.078	-155.097	-151.451	-152.606	-150.09	-152.972	-151.903	-150.41	-150.8	-149.239	-150.738	-155.53	-150.989	-156.255	-159.045	-159.467	-159.679	-161.405			78.6	-152.302	-153.659	-158.555	-158.453	-156.09	-156.67	-157.934	-156.876	-156.076	-157.059	-158.513	-157.824	-156.575	-158.72	-162.002	-159.382	-158.303	-156.078			78.6	-153.443	-153.301	-154.645	-153.186	-154.123	-153.751	-156.27
78.7	-151.885	-154.989	-151.377	-151.715	-151.76	-152.383	-151.803	-151.212	-151.131	-148.988	-151.735	-154.52	-150.44	-156.201	-158.6	-159.654	-159.911	-160.956			78.7	-152.183	-154.116	-158.467	-158.856	-156.044	-157.167	-157.791	-156.584	-156.704	-157.312	-158.421	-156.889	-156.507	-158.553	-162.234	-159.253	-158.376	-156.613			78.7	-153.542	-153.47	-154.28	-153.076	-154.338	-153.463	-156.354
78.8	-152.214	-154.052	-150.976	-150.867	-152.979	-152.454	-151.676	-151.872	-150.837	-148.979	-152.301	-154.057	-150.256	-155.917	-157.934	-158.985	-160.059	-160.716			78.8	-152.002	-154.43	-157.873	-158.494	-155.442	-157.139	-157.251	-156.059	-157.114	-157.647	-158.391	-156.771	-156.486	-158.199	-161.96	-159.096	-158.705	-157.291			78.8	-153.241	-153.542	-153.602	-152.684	-154.356	-154.079	-156.047
78.9	-152.307	-153.129	-150.39	-151.071	-152.849	-153.247	-151.812	-151.642	-149.957	-149.268	-151.998	-154.49	-150.651	-156.073	-157.943	-158.018	-160.06	-160.763			78.9	-151.697	-154.329	-157.036	-157.853	-154.412	-156.673	-156.619	-155.571	-157.203	-157.835	-158.424	-157.289	-156.827	-157.99	-161.692	-158.735	-158.898	-157.569			78.9	-152.45	-153.768	-153.297	-152.718	-154.23	-154.982	-155.301
79	-152.208	-152.942	-150.171	-151.405	-152.068	-154.181	-152.333	-150.78	-149.363	-149.845	-151.499	-155.419	-151.087	-156.896	-158.932	-157.713	-159.912	-160.608			79	-151.429	-154.095	-156.101	-157.45	-153.761	-156.063	-156	-155.409	-157.421	-157.646	-158.116	-158.036	-157.53	-158.2	-161.805	-158.223	-158.907	-157.288			79	-151.483	-154.222	-153.531	-153.326	-154.273	-155.547	-154.782
79.1	-151.519	-153.504	-150.343	-150.874	-151.516	-154.487	-152.75	-150.069	-149.518	-150.615	-151.347	-156.144	-151.155	-157.823	-160.058	-158.172	-159.637	-160.157			79.1	-151.557	-154.058	-155.499	-157.536	-153.613	-155.64	-155.406	-155.859	-157.806	-157.282	-157.621	-158.555	-158.423	-158.965	-162.068	-157.919	-159.076	-156.496			79.1	-151.107	-154.437	-153.839	-153.985	-154.655	-155.504	-154.797
79.2	-150.656	-154.329	-150.334	-150.152	-151.334	-153.881	-152.872	-149.538	-150.033	-150.866	-151.451	-155.917	-150.653	-158.158	-160.366	-158.701	-159.048	-160.075			79.2	-151.936	-153.931	-155.741	-158.195	-153.499	-155.667	-155.367	-156.669	-157.747	-157.077	-157.476	-158.257	-158.899	-159.975	-162.027	-157.846	-159.281	-155.309			79.2	-151.634	-154.231	-153.973	-154.187	-155.025	-155.01	-155.118
79.3	-150.913	-154.73	-149.767	-150.003	-151.21	-153.012	-152.84	-149.142	-150.301	-150.198	-151.624	-154.868	-149.694	-157.572	-159.868	-158.535	-158.164	-160.538			79.3	-152.313	-153.488	-156.504	-159.258	-153.618	-155.805	-156.093	-157.178	-157.301	-157.195	-157.863	-157.437	-158.642	-160.48	-161.708	-157.636	-158.931	-154.366			79.3	-152.524	-154.231	-154.259	-153.998	-154.955	-154.373	-155.574
79.4	-152.072	-154.669	-148.921	-150.492	-151.176	-152.979	-152.474	-149.183	-150.306	-149.41	-151.716	-153.91	-149.129	-156.873	-159.295	-157.913	-157.788	-160.766			79.4	-152.836	-153.155	-157.159	-159.937	-154.185	-155.597	-156.86	-156.773	-157.141	-157.676	-158.483	-157.045	-158.237	-160.077	-161.479	-157.418	-158.232	-154.441			79.4	-153.25	-154.828	-154.934	-153.847	-154.568	-153.839	-155.827
79.5	-152.449	-154.403	-148.669	-151.485	-151.442	-154.014	-151.654	-149.705	-150.539	-149.313	-151.776	-153.408	-149.568	-157.244	-159.165	-157.722	-158.595	-160.279			79.5	-153.413	-153.033	-157.417	-159.605	-154.589	-155.044	-157.195	-155.728	-157.295	-158.402	-158.926	-157.205	-158.234	-159.345	-161.37	-157.612	-158.147	-155.307			79.5	-153.622	-155.333	-155.668	-153.756	-154.197	-153.722	-155.663
79.6	-151.61	-153.778	-149.6	-152.37	-151.382	-155.383	-150.774	-150.696	-151.427	-149.722	-152.076	-153.145	-150.326	-158.449	-159.261	-158.202	-159.713	-159.417			79.6	-153.466	-152.935	-157.122	-158.711	-154.361	-154.477	-157.467	-154.958	-157.467	-158.896	-159.015	-157.63	-158.515	-159.117	-160.996	-157.983	-158.804	-156.066			79.6	-153.64	-155.197	-156.057	-153.267	-153.848	-154.033	-155.29
79.7	-150.472	-153.115	-151.199	-152.582	-150.676	-156.183	-150.379	-151.981	-152.539	-150.14	-152.427	-153.336	-150.552	-159.391	-159.135	-158.872	-159.779	-158.919			79.7	-152.972	-152.922	-156.618	-158.028	-153.951	-154.253	-157.843	-154.856	-157.372	-158.867	-159.03	-158.273	-158.712	-159.447	-160.328	-158.022	-159.564	-156.238			79.7	-153.376	-154.662	-155.852	-152.525	-153.528	-154.428	-154.975
79.8	-149.612	-153.105	-152.164	-152.09	-150.072	-155.653	-150.523	-152.814	-152.797	-150.203	-152.406	-154.307	-150.573	-159.557	-158.836	-159.377	-159.088	-159.275			79.8	-152.547	-152.856	-156.536	-157.819	-153.747	-154.455	-158.132	-155.189	-156.809	-158.784	-159.269	-158.739	-158.684	-159.611	-159.978	-157.535	-160.064	-155.987			79.8	-152.838	-154.173	-155.05	-152.097	-153.512	-154.849	-154.774
79.9	-149.015	-153.678	-151.73	-151.103	-150.098	-154.041	-151.284	-152.464	-151.842	-149.889	-152.025	-155.582	-151.156	-159.095	-158.843	-159.401	-158.783	-160.11			79.9	-152.255	-152.717	-156.782	-157.752	-153.679	-154.997	-158.251	-155.672	-156.196	-158.826	-159.448	-158.519	-158.327	-159.17	-160.185	-156.724	-159.99	-155.782			79.9	-152.538	-154.072	-154.188	-151.893	-153.984	-155.335	-154.529
80	-148.944	-154.33	-150.34	-150.115	-150.412	-152.711	-152.516	-151.269	-150.72	-149.465	-151.746	-156.286	-152.013	-158.284	-159.261	-158.567	-159.025	-160.756			80	-151.99	-152.856	-156.762	-157.216	-154	-155.717	-158.118	-156.13	-156.178	-158.474	-159.075	-157.892	-157.409	-158.753	-160.714	-156.267	-159.203	-155.866			80	-152.964	-154.309	-153.67	-151.697	-154.626	-155.523	-154.187
80.1	-150.031	-154.719	-149.228	-149.954	-150.829	-152.63	-153.231	-150.39	-150.702	-149.137	-151.795	-156.201	-151.937	-157.551	-159.748	-157.198	-159.425	-160.822			80.1	-152.145	-153.194	-156.487	-156.071	-155.015	-156.32	-157.775	-156.264	-156.597	-157.685	-158.328	-157.421	-156.153	-159.09	-161.484	-156.625	-158.278	-156.141			80.1	-153.474	-154.706	-153.539	-151.732	-154.949	-154.982	-154.276
80.2	-152.095	-154.794	-149.442	-150.779	-151.475	-153.254	-152.807	-150.386	-151.595	-149.125	-152.004	-155.797	-150.696	-156.975	-160.102	-156.166	-159.858	-160.454			80.2	-152.671	-153.247	-156.56	-155.189	-156.314	-156.324	-157.352	-156.169	-156.703	-156.938	-158.133	-157.263	-155.386	-159.8	-161.897	-157.274	-157.808	-156.443			80.2	-153.208	-155.1	-153.929	-152	-154.788	-153.999	-155.02
80.3	-153.81	-154.536	-150.495	-151.312	-151.731	-153.646	-152.002	-150.775	-152.243	-149.358	-152.275	-155.403	-149.292	-156.034	-160.173	-156.264	-160.036	-160.215			80.3	-153.029	-152.806	-157.012	-155.24	-157.044	-155.532	-156.808	-156.331	-156.447	-156.719	-158.718	-157.486	-155.764	-160.167	-161.301	-157.361	-157.793	-156.701			80.3	-152.362	-155.096	-154.564	-152.341	-154.236	-153.52	-155.73
80.4	-154.295	-153.971	-151.094	-150.574	-151.077	-153.971	-151.735	-151.063	-152.576	-149.157	-152.556	-155.124	-148.549	-155.145	-160.112	-157.344	-159.796	-160.351			80.4	-153.029	-152.339	-157.251	-155.807	-156.745	-154.805	-156.366	-156.594	-156.569	-157.178	-159.192	-157.989	-156.915	-160.274	-160.424	-157.147	-157.928	-156.763			80.4	-151.806	-154.634	-154.913	-152.819	-153.46	-153.896	-155.969
80.5	-153.884	-153.67	-150.784	-149.848	-150.003	-154.518	-151.981	-151.039	-152.964	-148.378	-152.561	-154.905	-148.844	-155.683	-160.337	-158.58	-159.466	-160.585			80.5	-153.031	-152.506	-157.153	-156.458	-155.845	-155.067	-156.422	-156.31	-157.101	-157.911	-159.29	-158.392	-157.911	-160.487	-160.418	-157.574	-158.087	-156.647			80.5	-152.081	-154.343	-154.92	-153.395	-153.04	-154.406	-156.152
80.6	-153.313	-154.092	-149.872	-150.321	-149.584	-154.723	-152.494	-150.692	-152.805	-148.136	-151.937	-154.458	-150.031	-157.314	-160.492	-159.446	-158.959	-160.865			80.6	-153.635	-152.798	-156.989	-157.196	-154.935	-155.835	-156.959	-155.37	-157.243	-158.541	-159.572	-158.55	-158.226	-160.819	-160.991	-158.27	-158.462	-156.65			80.6	-152.846	-154.697	-154.698	-153.933	-153.739	-154.552	-156.47
80.7	-152.926	-154.689	-149.152	-150.936	-150.45	-154.413	-152.888	-150.607	-152.02	-148.896	-150.993	-154.123	-151.188	-158.154	-159.999	-159.567	-158.033	-161.309			80.7	-154.633	-152.331	-156.921	-157.915	-154.311	-156.143	-157.559	-154.694	-156.904	-158.951	-160.062	-158.554	-157.948	-161.075	-161.223	-158.02	-159.021	-156.757			80.7	-153.429	-155.222	-154.306	-154.364	-155.063	-154.618	-156.437
80.8	-152.372	-154.638	-149.159	-150.783	-151.745	-154.019	-152.557	-150.93	-151.501	-150.008	-150.638	-154.427	-151.315	-157.939	-159.285	-158.888	-157.73	-161.527			80.8	-154.947	-151.67	-157.124	-158.317	-154.292	-155.945	-157.911	-155.18	-156.849	-158.912	-160.398	-158.505	-157.563	-160.818	-160.978	-157.238	-159.343	-156.65			80.8	-153.73	-155.007	-154.012	-154.408	-155.791	-154.683	-155.764
80.9	-151.525	-153.902	-149.364	-150.238	-151.882	-153.591	-151.788	-150.963	-151.598	-150.951	-151.104	-154.983	-150.689	-157.696	-159.108	-157.973	-158.78	-161.179			80.9	-154.051	-151.809	-157.482	-158.117	-154.722	-155.759	-157.922	-156.196	-157.196	-158.144	-160.359	-158.514	-157.472	-159.866	-160.56	-157.35	-159.288	-156.207			80.9	-153.854	-154.053	-154.103	-154.098	-155.636	-154.58	-154.842
81	-150.996	-153.393	-149.445	-149.901	-150.471	-152.84	-151.322	-150.491	-151.847	-151.243	-151.554	-155.302	-150.697	-157.637	-159.611	-157.547	-159.986	-160.893			81	-152.853	-152.438	-157.619	-157.655	-154.982	-155.892	-157.554	-156.526	-157.213	-157.068	-159.78	-158.644	-157.735	-158.93	-160.347	-158.38	-158.973	-155.746			81	-153.786	-153.257	-154.604	-153.653	-154.86	-154.497	-154.225
81.1	-150.933	-153.828	-150.123	-150.133	-148.692	-152.236	-151.08	-150.099	-151.832	-150.65	-151.148	-155.216	-151.376	-157.693	-160.47	-157.842	-160.142	-161.219			81.1	-152.327	-152.779	-157.374	-157.487	-154.855	-156.359	-157.17	-156.127	-156.52	-156.764	-158.919	-158.779	-158.208	-158.691	-160.686	-159.247	-158.274	-155.8			81.1	-153.633	-153.235	-155.101	-153.29	-153.861	-154.718	-154.079
81.2	-151.01	-154.775	-151.095	-150.658	-147.765	-152.74	-150.715	-150.111	-151.619	-149.693	-150.244	-154.975	-151.083	-157.924	-160.916	-158.46	-159.671	-161.646			81.2	-152.308	-152.86	-156.821	-157.485	-154.54	-156.789	-157.296	-155.803	-155.644	-157.487	-158.392	-158.747	-158.591	-158.885	-161.516	-159.22	-157.274	-156.452			81.2	-153.648	-153.972	-155.034	-153.541	-153.261	-155.417	-154.304
81.3	-151.314	-155.053	-150.693	-150.968	-147.962	-153.903	-150.64	-150.128	-151.482	-149.014	-149.815	-155.144	-149.496	-158.235	-160.391	-158.638	-159.579	-161.476			81.3	-152.325	-152.902	-156.587	-157.485	-154.169	-156.904	-157.807	-155.904	-155.323	-158.378	-158.167	-158.545	-158.455	-159.103	-162.332	-158.389	-156.676	-157.203			81.3	-154.004	-154.967	-154.445	-154.315	-153.344	-156.364	-154.782
81.4	-151.863	-154.004	-148.843	-150.598	-148.771	-154.333	-151.289	-150.003	-151.659	-148.656	-150.15	-155.76	-148.228	-158.655	-159.583	-158.129	-159.95	-160.81			81.4	-152.467	-152.652	-157.29	-157.579	-153.771	-156.922	-158.183	-156.091	-155.556	-158.774	-157.778	-158.274	-157.818	-159.311	-162.741	-157.477	-156.969	-157.554			81.4	-154.386	-155.393	-153.878	-154.556	-153.764	-156.823	-155.133
81.5	-152.004	-152.755	-147.57	-149.542	-149.676	-153.889	-151.969	-150.231	-152.085	-148.176	-150.823	-156.131	-148.522	-159.039	-159.39	-157.707	-160.177	-160.588			81.5	-152.987	-152.24	-158.479	-157.553	-153.259	-156.817	-158.145	-156.126	-155.892	-158.755	-157.351	-158.092	-157.254	-159.478	-162.992	-157.159	-157.849	-157.621			81.5	-154.453	-155.038	-153.545	-153.968	-154.09	-156.308	-155.114
81.6	-151.161	-152.836	-147.92	-148.836	-150.522	-153.45	-151.621	-150.622	-152.286	-147.678	-151.424	-155.725	-149.913	-159.022	-159.649	-158.024	-159.899	-161.245			81.6	-153.828	-152.232	-159.168	-157.355	-152.664	-156.441	-157.906	-156.026	-156.41	-158.556	-157.344	-158.062	-157.323	-159.566	-163.239	-157.558	-158.568	-157.681			81.6	-154.7	-154.664	-153.256	-153.245	-154.313	-155.148	-155.135
81.7	-149.863	-153.491	-148.791	-149.367	-151.01	-153.436	-150.762	-150.508	-151.907	-148.193	-151.704	-154.944	-151.023	-158.548	-159.583	-158.807	-159.338	-162.095			81.7	-154.585	-152.751	-158.933	-157.437	-152.374	-156.209	-157.846	-155.69	-157.215	-158.252	-157.681	-158.03	-157.984	-159.6	-163.21	-158.163	-158.667	-157.498			81.7	-155.463	-154.591	-152.844	-152.591	-154.385	-154.411	-155.526
81.8	-149.276	-153.235	-149.15	-150.659	-150.761	-153.507	-150.778	-150.074	-151.37	-149.598	-151.815	-154.597	-151.329	-157.733	-158.953	-159.366	-159.251	-162.567			81.8	-154.773	-153.426	-158.294	-157.994	-152.698	-156.526	-158.134	-155.312	-157.716	-157.687	-158.09	-157.921	-158.562	-159.458	-162.798	-158.402	-158.373	-157.058			81.8	-155.794	-154.56	-152.486	-151.929	-154.023	-154.656	-155.726
81.9	-149.793	-152.722	-149.191	-151.941	-150.179	-153.213	-151.491	-149.973	-151.36	-150.329	-152.268	-154.749	-151.218	-156.989	-158.597	-159.114	-159.955	-162.693			81.9	-154.502	-153.928	-157.972	-158.683	-153.325	-156.987	-158.79	-155.308	-157.625	-157.05	-158.46	-157.87	-158.666	-159.062	-162.16	-158.326	-157.958	-156.764			81.9	-154.794	-154.805	-152.803	-151.686	-153.394	-155.262	-155.116
82	-150.878	-153.132	-149.157	-152.855	-150.039	-152.702	-151.858	-150.366	-151.702	-150.16	-152.899	-155.033	-150.531	-156.858	-159.168	-158.161	-160.666	-162.446			82	-154.233	-154.182	-158.047	-158.927	-153.8	-156.987	-159.371	-155.706	-157.389	-156.968	-158.39	-157.861	-158.463	-158.542	-161.553	-158.168	-157.721	-156.506			82	-153.182	-155.282	-153.956	-152.045	-153.208	-155.485	-154.007
82.1	-151.918	-154.098	-148.703	-153.079	-150.298	-152.556	-151.946	-150.953	-151.736	-150.243	-152.772	-155.232	-149.436	-157.019	-160.054	-157.504	-160.641	-161.593			82.1	-153.942	-154.3	-158.003	-158.484	-154.348	-156.598	-159.186	-156.087	-157.319	-157.359	-157.658	-157.915	-158.198	-158.05	-161.107	-157.945	-157.94	-155.985			82.1	-152.381	-155.352	-154.94	-152.372	-153.788	-155.09	-153.093
82.2	-152.379	-154.673	-147.655	-152.684	-150.352	-152.936	-152.092	-151.228	-151.323	-150.663	-151.785	-155.222	-148.998	-156.866	-160.132	-157.62	-160.274	-160.552			82.2	-153.271	-154.438	-157.707	-157.9	-155.103	-156.268	-158.323	-155.921	-157.422	-157.491	-156.927	-158.225	-158.14	-157.823	-160.82	-157.708	-158.412	-155.533			82.2	-152.565	-155.019	-154.882	-152.352	-154.63	-154.506	-152.786
82.3	-151.815	-154.691	-146.724	-152.213	-150.118	-153.704	-151.805	-150.861	-150.827	-150.741	-151.017	-155.247	-149.471	-156.507	-159.244	-157.957	-160.035	-160.252			82.3	-152.316	-154.433	-157.744	-157.767	-155.484	-156.13	-157.543	-155.289	-157.494	-157.517	-156.954	-158.727	-158.351	-158.333	-160.682	-157.788	-158.814	-155.404			82.3	-152.857	-154.809	-154.188	-152.546	-155.191	-154.407	-153.246
82.4	-150.808	-154.71	-146.688	-151.892	-150.034	-154.838	-150.841	-150.351	-150.749	-150.414	-150.994	-155.508	-150.205	-156.503	-158.447	-158.246	-159.693	-160.679			82.4	-151.638	-154.065	-158.298	-157.793	-155.18	-156.092	-157.356	-154.997	-157.162	-157.975	-157.521	-159.178	-158.619	-159.445	-160.649	-158.342	-158.902	-155.329			82.4	-152.948	-154.864	-153.68	-153.226	-155.317	-154.942	-154.253
82.5	-150.536	-155.136	-147.188	-151.311	-150.266	-155.825	-149.782	-150.609	-151.088	-150.239	-151.353	-155.829	-150.742	-157.105	-158.307	-158.577	-159.166	-161.047			82.5	-151.407	-153.454	-158.852	-157.33	-154.397	-156.132	-157.684	-155.317	-156.594	-158.542	-157.903	-159.498	-158.69	-160.063	-160.879	-158.914	-158.622	-155.378			82.5	-153.202	-155.104	-153.555	-153.879	-155.069	-155.552	-155.198
82.6	-150.896	-155.46	-147.565	-150.567	-150.394	-155.903	-149.377	-151.534	-151.152	-150.365	-151.638	-156.072	-150.889	-157.908	-158.217	-158.955	-158.788	-161.011			82.6	-151.552	-152.869	-158.917	-156.621	-153.58	-156.329	-158.172	-155.587	-156.392	-158.741	-157.823	-159.377	-158.367	-159.762	-161.515	-158.918	-158.3	-155.978			82.6	-153.556	-155.305	-153.707	-153.83	-154.631	-155.529	-155.728
82.7	-150.583	-154.83	-148.087	-150.845	-150.277	-155.099	-149.951	-151.933	-150.763	-150.206	-151.455	-156.237	-150.595	-158.393	-158.075	-159.343	-158.873	-160.683			82.7	-152.28	-152.356	-158.325	-156.523	-153.349	-156.524	-158.569	-155.593	-156.477	-158.828	-157.591	-158.521	-157.682	-159.205	-162.056	-158.473	-158.24	-156.943			82.7	-153.843	-155.209	-154.025	-153.076	-154.301	-154.999	-156.046
82.8	-149.446	-153.519	-149.104	-152.155	-149.912	-154.071	-150.992	-151.314	-150.758	-149.698	-151.037	-156.36	-150.165	-158.367	-158.375	-159.763	-159.35	-160.468			82.8	-153.364	-151.808	-157.615	-156.945	-153.634	-156.233	-158.872	-155.877	-156.281	-158.914	-157.647	-157.502	-157.052	-158.715	-162.032	-157.97	-158.427	-157.59			82.8	-154.295	-155.115	-154.535	-152.547	-154.376	-154.699	-156.072
82.9	-148.645	-152.621	-150.02	-152.836	-149.176	-153.449	-151.599	-150.823	-151.62	-149.63	-151.022	-156.738	-149.931	-157.705	-158.933	-160.02	-159.586	-160.901			82.9	-153.966	-151.288	-157.515	-157.135	-153.842	-155.542	-159.095	-156.312	-155.781	-158.465	-158.07	-157.052	-156.982	-158.506	-161.751	-157.376	-158.722	-157.682			82.9	-154.759	-155.343	-155.078	-152.903	-154.861	-154.918	-155.673
83	-148.729	-152.645	-150.043	-152.63	-148.925	-153.366	-151.46	-151.404	-152.594	-150.354	-151.498	-157.13	-149.903	-156.714	-159.246	-159.506	-159.743	-161.714			83	-153.813	-150.904	-157.826	-157.043	-153.86	-155.433	-159.12	-156.244	-155.457	-157.552	-158.665	-157.33	-157.48	-159.049	-161.9	-157.014	-158.963	-157.28			83	-154.733	-155.668	-155.253	-153.607	-155.378	-155.326	-155.249
83.1	-149.388	-153.121	-149.32	-152.465	-149.941	-153.49	-150.769	-151.959	-152.688	-151.113	-151.972	-156.748	-150.133	-156.359	-159.386	-158.156	-160.425	-161.958			83.1	-153.687	-150.652	-157.997	-156.876	-153.824	-156.311	-158.847	-155.765	-155.641	-157.046	-159.249	-158.056	-158.148	-159.909	-162.45	-157.556	-158.92	-156.606			83.1	-154.235	-155.855	-154.985	-153.852	-155.476	-155.445	-154.853
83.2	-149.958	-153.4	-148.765	-152.41	-151.414	-153.654	-149.885	-150.978	-151.852	-151.048	-151.858	-155.596	-150.743	-156.878	-159.445	-157.074	-160.969	-161.341			83.2	-154.016	-150.863	-158.131	-156.575	-154.014	-157.135	-158.414	-155.434	-156.072	-157.416	-159.634	-158.645	-158.624	-160.23	-162.55	-158.644	-158.425	-156.307			83.2	-153.826	-155.957	-154.619	-153.7	-154.979	-155.156	-154.326
83.3	-150.355	-153.504	-148.777	-152.085	-152.12	-153.803	-149.41	-148.935	-150.645	-150.556	-151.082	-154.412	-151.216	-157.249	-159.321	-157.008	-160.762	-160.709			83.3	-154.248	-151.603	-158.36	-156.618	-154.604	-156.899	-158.135	-155.447	-156.124	-158.062	-159.406	-158.822	-158.647	-160.07	-161.835	-159.378	-157.753	-156.519			83.3	-153.897	-155.859	-154.353	-153.533	-154.183	-154.581	-153.903
83.4	-151.136	-154.026	-148.896	-151.631	-151.419	-153.778	-149.703	-147.523	-149.609	-150.44	-150.332	-153.802	-151.168	-157.246	-159.594	-157.654	-160.252	-160.865			83.4	-154.101	-152.06	-158.326	-157.484	-155.072	-155.882	-157.983	-155.612	-155.928	-158.168	-158.36	-158.888	-158.266	-159.801	-160.864	-159.64	-157.442	-156.668			83.4	-154.323	-155.444	-154.103	-153.261	-153.692	-153.978	-153.632
83.5	-151.927	-155.09	-148.643	-151.418	-149.929	-153.468	-150.372	-147.587	-149.633	-150.423	-150.395	-154.124	-151.045	-157.961	-160.632	-158.478	-160.067	-161.544			83.5	-153.827	-151.746	-157.945	-158.557	-154.588	-155.318	-157.803	-155.676	-156.357	-157.814	-157.131	-159.065	-157.831	-159.509	-160.114	-159.761	-157.579	-156.537			83.5	-154.76	-154.805	-154.064	-152.959	-153.728	-153.652	-153.559
83.6	-151.858	-156.226	-148.299	-151.272	-149.194	-153.074	-150.719	-148.966	-151.163	-150.171	-151.353	-155.452	-151.102	-159.382	-161.483	-159.108	-160.239	-162.01			83.6	-153.608	-151.361	-157.618	-159.046	-153.329	-155.823	-157.661	-155.61	-157.421	-157.564	-156.506	-159.347	-157.44	-159.161	-159.581	-159.898	-158.089	-156.343			83.6	-155.064	-154.026	-154.43	-153.063	-153.925	-153.523	-153.783
83.7	-151.47	-156.887	-148.442	-151.082	-149.723	-153.108	-150.317	-150.735	-152.986	-150.105	-152.356	-156.901	-151.165	-160.179	-161.386	-159.601	-160.137	-162.03			83.7	-153.532	-151.83	-157.693	-158.933	-152.588	-156.429	-157.638	-155.701	-158.078	-157.55	-156.528	-159.627	-157.018	-158.784	-159.34	-159.978	-159.013	-156.222			83.7	-155.113	-153.383	-154.99	-153.429	-154.066	-153.37	-153.926
83.8	-151.675	-156.414	-149.024	-151.125	-150.479	-153.533	-149.596	-151.761	-153.332	-150.351	-152.24	-157.18	-151.225	-159.706	-160.672	-159.967	-159.653	-162.005			83.8	-153.594	-152.675	-158.051	-158.438	-152.75	-156.287	-157.995	-156.231	-157.649	-157.671	-156.629	-159.528	-156.764	-158.692	-159.53	-159.884	-159.883	-156.086			83.8	-154.722	-153.347	-155.422	-153.611	-154.399	-153.217	-153.902
83.9	-152.058	-154.749	-149.371	-151.327	-150.431	-153.97	-149.508	-151.989	-152.08	-150.621	-151.058	-156.249	-151.119	-158.636	-159.801	-159.892	-159.57	-161.993			83.9	-153.746	-152.555	-158.155	-157.794	-153.113	-155.937	-158.887	-156.898	-156.33	-157.894	-156.585	-158.961	-157.062	-159.077	-159.904	-159.778	-160.059	-155.888			83.9	-154.055	-154.053	-155.584	-153.77	-154.934	-153.135	-154.292
84	-151.767	-153.068	-149.115	-151.24	-149.967	-154.311	-150.156	-152.165	-150.691	-150.526	-150.2	-155.091	-150.58	-158.1	-158.752	-159.57	-159.973	-161.563			84	-154.121	-151.496	-157.698	-157.399	-153.488	-156.142	-159.742	-157.296	-154.947	-157.994	-156.719	-158.418	-157.891	-159.526	-160.093	-159.857	-159.506	-155.817			84	-153.441	-155.168	-155.681	-154.08	-155.251	-153.142	-155.067
84.1	-150.713	-152.683	-148.911	-150.893	-150.077	-154.475	-150.58	-152.359	-150.174	-150.075	-150.383	-154.213	-150.145	-158.211	-157.806	-159.536	-160.17	-161.252			84.1	-154.56	-150.798	-157.158	-157.314	-153.96	-156.798	-159.952	-157.468	-154.421	-157.777	-156.967	-158.341	-158.512	-159.528	-160.1	-159.88	-158.662	-155.976			84.1	-153.118	-156.139	-156.035	-154.166	-155.347	-153.462	-155.388
84.2	-149.959	-153.611	-149.355	-150.867	-150.762	-154.403	-150.341	-151.916	-150.349	-149.828	-151.009	-153.498	-150.501	-158.272	-157.518	-159.712	-160.127	-161.658			84.2	-154.461	-151.202	-157.09	-157.126	-154.053	-157.266	-159.463	-157.497	-155.06	-157.666	-157.194	-158.769	-158.333	-159.222	-160.001	-159.708	-157.994	-156.112			84.2	-153.394	-156.314	-156.429	-153.855	-155.6	-154.276	-155.08
84.3	-150.718	-154.807	-149.615	-151.186	-151.365	-153.947	-150.269	-150.941	-150.568	-149.729	-151.414	-153.11	-151	-158.045	-157.782	-159.543	-160.234	-162.178			84.3	-153.545	-152.226	-157.151	-156.761	-153.671	-157.06	-158.72	-157.388	-156.537	-157.959	-157.667	-159.522	-157.549	-159.03	-159.606	-159.501	-157.672	-156.248			84.3	-154.068	-155.651	-156.146	-153.519	-155.96	-155.226	-154.862
84.4	-152.381	-155.264	-148.875	-151.263	-151.613	-153.466	-150.635	-150.195	-150.453	-149.32	-151.175	-153.089	-150.609	-157.987	-158.153	-158.965	-160.459	-162.383			84.4	-152.425	-153.17	-156.974	-156.789	-153.633	-156.298	-158.338	-157.123	-158.036	-158.342	-158.313	-160.317	-156.776	-158.955	-158.952	-159.188	-157.774	-156.433			84.4	-154.288	-154.741	-155.068	-153.339	-156.134	-155.555	-154.957
84.5	-153.215	-154.857	-147.855	-151.307	-151.189	-153.783	-150.554	-149.883	-150.385	-149.066	-150.192	-153.078	-149.761	-158.655	-158.523	-158.705	-160.691	-162.418			84.5	-151.893	-153.725	-157	-157.436	-154.448	-155.608	-158.506	-156.438	-158.851	-158.477	-158.847	-160.639	-156.663	-158.929	-158.639	-158.77	-158.082	-156.321			84.5	-153.695	-153.887	-153.961	-153.203	-156.065	-155.157	-154.788
84.6	-152.857	-154.138	-147.358	-151.842	-149.829	-154.242	-150.095	-149.892	-150.767	-149.192	-149.382	-153.099	-149.745	-159.464	-158.948	-159.058	-160.851	-162.336			84.6	-152.066	-153.938	-157.286	-158.115	-155.816	-155.331	-158.833	-155.459	-158.979	-158.405	-159.262	-160.17	-157.338	-159.02	-158.975	-158.56	-158.072	-156.239			84.6	-152.527	-153.359	-153.388	-153.193	-155.929	-154.687	-154.063
84.7	-152.001	-153.495	-147.226	-152.318	-148.367	-153.709	-150.045	-150.132	-151.029	-149.333	-150.086	-153.588	-150.493	-158.974	-159.491	-159.33	-160.538	-162.001			84.7	-152.566	-154.251	-157.136	-158.286	-157.3	-155.107	-158.946	-154.972	-158.664	-158.419	-159.485	-159.349	-158.18	-158.984	-159.553	-158.636	-157.842	-156.625			84.7	-151.305	-153.561	-153.462	-153.109	-155.888	-154.251	-153.408
84.8	-150.874	-153.345	-147.413	-152.261	-148.123	-152.931	-150.168	-150.48	-150.8	-149.729	-152.265	-154.76	-150.734	-157.462	-159.854	-158.829	-159.648	-161.506			84.8	-153.03	-154.68	-156.502	-157.813	-158.357	-155.002	-158.84	-155.225	-158.127	-158.596	-159.115	-158.842	-158.459	-158.681	-159.997	-158.742	-157.926	-156.819			84.8	-150.964	-154.236	-154.04	-152.672	-155.911	-153.436	-153.398
84.9	-149.566	-154.224	-148.233	-151.852	-149.372	-153.157	-150.069	-150.799	-150.654	-150.259	-154.028	-156.209	-150.106	-156.538	-159.687	-157.773	-158.912	-161.516			84.9	-153.375	-154.561	-155.994	-157.09	-158.361	-155.516	-158.632	-155.934	-157.479	-158.719	-157.985	-158.715	-158.019	-158.49	-160.231	-158.735	-158.309	-156.257			84.9	-151.995	-154.765	-154.404	-152.581	-155.723	-152.558	-153.831
85	-148.587	-155.727	-149.349	-151.219	-151.037	-154.195	-150.116	-150.907	-150.833	-149.998	-153.798	-157.159	-149.396	-156.777	-159.32	-157.121	-158.979	-162.26			85	-153.571	-153.884	-155.878	-156.698	-157.447	-156.363	-158.319	-156.735	-156.747	-158.486	-156.736	-158.696	-157.369	-158.73	-160.19	-158.563	-158.761	-155.576			85	-153.505	-154.763	-153.921	-153.389	-155.148	-152.245	-154.385
85.1	-148.507	-156.492	-150.076	-150.803	-151.917	-155.021	-150.421	-150.61	-151.235	-148.929	-152.475	-157.135	-149.252	-157.57	-159.19	-157.346	-159.677	-162.803			85.1	-153.474	-153.446	-156.177	-156.959	-156.341	-156.77	-157.817	-157.094	-156.297	-157.935	-156.142	-158.747	-157.132	-159.337	-159.789	-158.159	-159.186	-155.621			85.1	-154.253	-154.377	-153.129	-154.181	-154.368	-152.502	-154.898
85.2	-149.453	-155.992	-150.022	-150.837	-151.781	-155.148	-150.573	-149.895	-151.936	-148.27	-151.706	-156.363	-149.686	-157.726	-159.236	-157.742	-160.254	-162.287			85.2	-153.179	-153.467	-156.72	-158.116	-155.405	-156.338	-157.371	-157.021	-156.208	-157.698	-156.248	-158.822	-157.441	-159.852	-159.194	-157.661	-159.318	-156.286			85.2	-154.133	-154.431	-153.076	-154.141	-153.772	-153.008	-155.252
85.3	-150.579	-155.072	-149.069	-150.944	-151.101	-154.864	-150.319	-149.202	-152.609	-148.633	-151.852	-155.498	-150.286	-156.948	-159.321	-158.137	-160.161	-161.182			85.3	-153.013	-153.474	-156.888	-159.665	-154.834	-155.543	-157.419	-157.167	-155.945	-158.178	-156.591	-158.805	-158.021	-159.613	-158.885	-157.288	-159.232	-156.812			85.3	-154.013	-155.137	-153.792	-153.919	-153.591	-153.637	-155.425
85.4	-150.55	-154.589	-147.814	-151.313	-150.432	-154.56	-149.81	-148.779	-152.512	-149.491	-152.755	-155.423	-150.549	-156.335	-159.24	-159.244	-159.905	-160.717			85.4	-153.094	-153.39	-156.621	-160.243	-154.758	-155.24	-157.992	-157.674	-155.555	-158.744	-156.739	-158.883	-158.463	-158.929	-159.139	-157.127	-159.181	-156.892			85.4	-154.458	-155.721	-154.31	-154.046	-153.769	-154.294	-155.34
85.5	-149.562	-154.345	-147.39	-151.998	-150.19	-154.22	-149.645	-148.645	-151.521	-150.39	-153.477	-156.239	-150.47	-156.473	-158.628	-160.783	-160.276	-161.207			85.5	-153.194	-153.668	-156.498	-159.589	-154.597	-155.618	-158.558	-157.895	-155.491	-158.707	-156.648	-159.163	-158.593	-158.838	-159.891	-157.236	-158.923	-156.843			85.5	-154.849	-155.773	-153.995	-153.751	-154.302	-154.6	-154.938
85.6	-149.277	-153.754	-148.151	-151.979	-150.422	-153.898	-150.135	-148.995	-150.364	-151.048	-152.84	-156.44	-150.414	-156.827	-157.726	-161.452	-160.65	-161.761			85.6	-153.039	-154.335	-156.472	-158.635	-153.86	-155.969	-159	-157.322	-155.556	-158.358	-156.541	-159.321	-158.626	-159.365	-160.726	-157.476	-158.3	-156.833			85.6	-154.467	-155.332	-153.166	-152.944	-155.044	-154.264	-154.56
85.7	-149.903	-152.916	-149.315	-150.999	-150.684	-153.645	-150.617	-149.577	-149.76	-150.987	-151.684	-155.118	-150.423	-157.139	-157.352	-160.596	-160.094	-162.057			85.7	-152.621	-154.428	-156.444	-157.696	-153.355	-155.615	-159.591	-156.145	-155.303	-158.297	-156.508	-159.234	-158.508	-159.634	-161.147	-157.597	-157.844	-156.692			85.7	-153.651	-154.534	-152.44	-152.656	-155.22	-153.659	-154.334
85.8	-150.524	-152.689	-149.972	-150.236	-150.626	-153.115	-150.558	-150.079	-150.044	-150.305	-151.546	-153.604	-150.349	-157.679	-157.771	-159.087	-159.201	-162.499			85.8	-152.31	-153.519	-156.675	-156.654	-154.061	-154.836	-159.955	-155.124	-155.133	-158.383	-156.349	-159.143	-158.343	-159.28	-161.078	-157.556	-158.043	-156.574			85.8	-153.237	-154.145	-152.12	-152.686	-154.294	-153.488	-153.991
85.9	-151.389	-153.555	-149.703	-150.376	-150.525	-152.51	-150.419	-150.597	-150.953	-149.61	-152.204	-153.439	-150.144	-158.167	-158.297	-158.151	-159.014	-162.812			85.9	-152.13	-152.658	-156.896	-155.887	-155.339	-154.372	-159.753	-154.932	-155.667	-158.057	-156.032	-158.97	-158.718	-158.679	-160.703	-157.705	-158.545	-156.791			85.9	-153.487	-154.798	-152.116	-151.94	-153.148	-154.134	-153.832
86	-152.539	-154.94	-148.605	-151.141	-150.443	-152.636	-150.674	-150.98	-151.761	-149.385	-152.496	-154.534	-149.781	-158.139	-158.621	-157.803	-159.672	-162.588			86	-151.805	-152.648	-156.758	-155.945	-155.763	-154.53	-159.228	-155.411	-156.723	-157.405	-155.955	-158.569	-159.519	-158.412	-160.274	-158.35	-158.878	-157.054			86	-153.83	-155.794	-152.267	-150.713	-152.94	-155.147	-154.253
86.1	-153.069	-156.237	-147.48	-152.269	-150.098	-153.417	-150.927	-150.864	-152.145	-149.819	-152.068	-156.055	-149.594	-157.849	-159.033	-157.632	-160.522	-162.359			86.1	-151.57	-153.032	-156.654	-156.786	-155.187	-154.978	-158.71	-155.943	-157.679	-157.047	-156.279	-158.316	-159.922	-158.654	-160.126	-159.114	-159.155	-156.963			86.1	-153.786	-156.032	-152.732	-150.218	-153.409	-155.658	-154.78
86.2	-152.711	-157.296	-147.377	-153.278	-149.74	-153.943	-150.805	-150.26	-152.138	-150.265	-151.517	-157.354	-150.175	-157.557	-159.203	-157.93	-160.779	-162.678			86.2	-151.784	-153.129	-156.806	-157.634	-154.685	-155.315	-158.382	-156.221	-157.892	-157.249	-156.719	-158.5	-159.694	-159.056	-160.257	-159.212	-159.622	-156.584			86.2	-153.713	-155.411	-153.674	-150.735	-153.704	-155.561	-154.76
86.3	-151.955	-157.715	-148.263	-153.561	-149.603	-153.961	-150.673	-149.569	-151.864	-149.935	-151.524	-157.827	-151.193	-157.147	-158.783	-158.443	-160.279	-163.101			86.3	-152.174	-153.093	-156.756	-158.022	-154.848	-155.437	-158.309	-156.254	-157.276	-157.859	-156.988	-158.961	-159.308	-159.355	-160.271	-158.423	-160.193	-156.016			86.3	-154.077	-154.652	-154.689	-151.673	-153.728	-155.191	-154.21
86.4	-151.114	-157.263	-148.782	-153.015	-149.611	-153.923	-150.855	-149.027	-151.344	-149.332	-151.822	-157.173	-151.51	-156.649	-158.358	-158.497	-159.753	-163.077			86.4	-152.019	-153.361	-156.364	-158.352	-155.221	-155.402	-158.636	-156.252	-156.66	-158.468	-156.872	-159.213	-159.036	-159.709	-160.004	-157.454	-160.382	-155.521			86.4	-154.581	-154.244	-154.926	-152.513	-153.767	-154.808	-153.81
86.5	-150.266	-156.427	-148.106	-151.977	-149.717	-153.823	-151.064	-148.649	-150.271	-149.351	-151.414	-155.62	-150.748	-156.132	-158.177	-158.692	-160.013	-162.639			86.5	-151.498	-153.76	-156.142	-158.642	-155.222	-155.495	-159.26	-156.384	-156.706	-158.4	-156.512	-158.763	-158.825	-160.17	-159.698	-157.225	-159.881	-155.603			86.5	-154.621	-154.141	-153.987	-153.098	-153.75	-154.625	-153.993
86.6	-149.906	-155.565	-147.316	-151.51	-150.157	-153.207	-150.941	-148.663	-149.268	-149.908	-150.189	-153.897	-149.553	-155.546	-157.642	-159.719	-160.786	-162.253			86.6	-151.637	-154	-156.253	-158.318	-154.837	-155.725	-159.656	-156.73	-156.978	-157.405	-156.274	-158.077	-158.616	-160.475	-159.528	-157.948	-159.014	-156.279			86.6	-154.161	-154.153	-152.785	-153.439	-153.566	-154.571	-154.252
86.7	-150.587	-154.624	-147.559	-152.387	-151.147	-152.266	-150.597	-149.207	-149.587	-150.279	-149.429	-152.938	-148.806	-155.151	-157.061	-160.656	-160.728	-162.133			86.7	-152.276	-154.117	-156.49	-157.291	-154.285	-155.796	-159.461	-157.301	-156.847	-156.564	-156.033	-158.053	-158.332	-160.402	-159.327	-159.058	-158.291	-157.04			86.7	-153.497	-154.064	-152.564	-153.528	-153.348	-154.476	-154.095
86.8	-151.606	-153.751	-148.356	-153.642	-152.044	-151.81	-150.473	-149.759	-150.865	-150.154	-149.902	-153.182	-148.68	-155.068	-157.444	-160.287	-159.587	-161.845			86.8	-152.454	-154.384	-156.902	-156.498	-153.699	-155.849	-158.948	-157.679	-156.647	-157.05	-155.582	-158.534	-158.11	-159.924	-158.924	-159.861	-157.91	-157.273			86.8	-153.012	-153.607	-153.234	-153.337	-153.32	-154.214	-153.888
86.9	-151.979	-153.18	-149.083	-153.724	-152.135	-152.079	-150.739	-149.852	-151.927	-149.81	-150.564	-154.113	-148.522	-155.256	-158.465	-158.897	-158.851	-161.149			86.9	-152.093	-154.983	-157.407	-156.927	-153.221	-155.931	-158.701	-157.329	-156.856	-158.227	-155.24	-159.033	-158.257	-159.227	-158.629	-159.952	-157.737	-156.827			86.9	-153.163	-152.994	-153.651	-153.014	-153.45	-153.83	-154.089
87	-152.009	-152.962	-149.516	-152.572	-151.857	-152.502	-151.1	-149.639	-152.392	-149.592	-150.398	-155.221	-148.19	-155.987	-158.704	-157.863	-159.304	-160.635			87	-151.807	-155.456	-157.591	-158.013	-153.036	-155.637	-158.76	-156.325	-156.97	-158.635	-155.35	-159.445	-158.549	-158.59	-158.79	-159.339	-157.846	-156.429			87	-153.782	-152.895	-153.347	-152.874	-153.294	-153.622	-154.646
87.1	-152.384	-153.162	-149.284	-151.577	-151.852	-152.772	-151.236	-149.225	-151.843	-149.666	-150.345	-156.34	-148.393	-156.927	-158.061	-158.026	-160.172	-160.932			87.1	-151.788	-155.233	-157.219	-158.46	-153.299	-154.995	-158.755	-155.363	-156.455	-157.95	-155.703	-159.47	-158.458	-158.194	-159.352	-158.533	-158.114	-156.605			87.1	-154.191	-153.447	-152.903	-152.869	-152.719	-153.671	-155.318
87.2	-152.76	-154.023	-148.738	-151.648	-152.055	-152.884	-151.373	-148.719	-150.293	-149.995	-151.519	-156.73	-149.323	-157.303	-157.88	-159.155	-160.41	-161.608			87.2	-151.589	-154.479	-156.812	-158.026	-153.767	-154.498	-158.687	-155.013	-155.914	-157.077	-155.856	-158.752	-158.104	-158.087	-160.207	-158.112	-157.852	-157.1			87.2	-154.158	-153.912	-152.702	-152.769	-152.397	-153.842	-155.716
87.3	-152.585	-155.347	-148.741	-152.397	-152.059	-152.561	-151.543	-148.664	-149.181	-150.574	-153.004	-155.712	-150.237	-157.185	-158.629	-160.245	-159.486	-161.717			87.3	-151.051	-153.865	-157.012	-157.375	-153.978	-154.488	-158.939	-155.243	-156.102	-156.891	-155.766	-157.676	-158.098	-158.174	-161.119	-158.281	-157.152	-157.414			87.3	-153.905	-153.724	-152.535	-152.957	-152.917	-154.195	-155.597
87.4	-152.107	-156.145	-149.126	-153.164	-151.595	-152.177	-151.19	-149.505	-149.499	-151.43	-153.57	-154.276	-150.765	-156.895	-159.313	-160.344	-158.049	-161.431			87.4	-150.783	-153.684	-157.361	-157.223	-154.05	-154.796	-159.459	-155.717	-156.827	-157.4	-155.774	-157.204	-158.509	-158.586	-161.416	-158.897	-156.961	-157.227			87.4	-153.708	-153.218	-152.451	-153.677	-154.049	-154.851	-155.309
87.5	-151.627	-156.083	-149.037	-153.56	-150.782	-152.71	-150.45	-150.89	-150.391	-151.869	-153.303	-153.75	-151.272	-156.685	-158.844	-159.545	-157.473	-161.581			87.5	-151.134	-153.62	-157.359	-157.775	-154.486	-155.092	-159.669	-156.194	-157.486	-158.036	-155.922	-157.706	-158.855	-159.425	-160.797	-159.416	-157.464	-156.964			87.5	-153.761	-153.019	-152.934	-154.201	-154.924	-155.399	-155.359
87.6	-150.961	-155.964	-148.434	-153.533	-150.181	-153.869	-150.06	-151.599	-150.906	-151.245	-152.506	-153.838	-151.854	-156.652	-157.572	-158.547	-158.003	-162.393			87.6	-151.733	-153.291	-157.295	-158.513	-155.251	-155.324	-159.617	-156.623	-157.747	-158.505	-156.046	-158.466	-158.786	-160.05	-159.96	-159.199	-157.979	-157.086			87.6	-153.738	-153.334	-153.995	-153.801	-154.777	-155.264	-155.722
87.7	-150.009	-156.034	-148.017	-153.282	-150.356	-154.348	-150.255	-151.037	-150.92	-150.22	-151.171	-153.969	-152.014	-156.141	-156.669	-157.81	-158.916	-163.594			87.7	-152.294	-152.776	-157.158	-158.832	-155.664	-155.596	-159.621	-156.844	-157.66	-158.942	-156.155	-158.726	-158.264	-159.955	-159.613	-158.331	-157.992	-157.232			87.7	-153.208	-153.895	-154.707	-152.802	-153.821	-154.489	-155.784
87.8	-149.126	-155.711	-147.944	-152.947	-151.034	-153.902	-150.948	-150.304	-150.518	-149.952	-149.913	-154.3	-151.386	-155.011	-156.273	-157.58	-159.661	-164.47			87.8	-152.639	-152.405	-156.49	-158.751	-155.384	-155.95	-159.441	-156.703	-157.402	-159.365	-156.175	-158.486	-157.803	-159.554	-159.777	-157.821	-157.61	-157.014			87.8	-152.696	-154.192	-154.452	-152.136	-153.253	-153.644	-155.282
87.9	-148.718	-154.922	-148.076	-152.58	-151.144	-153.396	-151.837	-150.535	-150.231	-150.451	-149.654	-154.682	-150.206	-154.238	-156.103	-158.056	-159.981	-164.301			87.9	-152.708	-152.352	-155.383	-158.535	-154.939	-156.178	-159.026	-156.403	-157.181	-159.583	-155.913	-158.11	-158.152	-159.324	-160.091	-158.442	-157.266	-156.811			87.9	-152.896	-154.031	-153.739	-152.298	-153.803	-153.18	-154.642
88	-148.959	-154.264	-148.782	-152.203	-150.445	-153.126	-152.283	-151.328	-150.498	-150.377	-150.277	-154.949	-149.223	-154.647	-156.145	-159.018	-160.232	-163.138			88	-152.734	-152.542	-154.687	-158.165	-154.871	-156.203	-158.679	-156.364	-157.215	-159.186	-155.578	-157.806	-159.182	-159.08	-160.3	-159.606	-157.193	-157.006			88	-153.319	-153.909	-153.371	-152.958	-154.673	-153.133	-154.281
88.1	-149.784	-153.971	-149.626	-151.836	-150.047	-153.011	-152.107	-151.397	-150.752	-149.575	-150.867	-155.392	-149.083	-155.999	-156.253	-159.889	-160.624	-161.695			88.1	-152.686	-152.921	-154.955	-157.449	-154.877	-156.105	-158.536	-156.683	-157.31	-158.133	-155.777	-157.634	-160.08	-158.602	-160.467	-160.327	-157.334	-157.234			88.1	-153.227	-154.163	-153.652	-153.817	-154.811	-153.319	-154.287
88.2	-150.563	-153.811	-149.093	-151.581	-150.724	-153.149	-152.09	-150.532	-150.67	-149.799	-151.213	-155.833	-149.431	-157.221	-156.669	-160.409	-160.725	-160.747			88.2	-152.548	-153.515	-155.844	-156.739	-154.436	-155.715	-158.485	-156.815	-157.039	-157.212	-156.566	-157.734	-160.343	-158.233	-160.808	-160.443	-157.559	-156.971			88.2	-152.869	-154.304	-154.228	-154.787	-154.242	-153.353	-154.203
88.3	-150.351	-153.669	-147.502	-151.595	-152.05	-153.068	-152.515	-149.671	-150.714	-151.083	-151.735	-155.815	-149.555	-157.589	-157.451	-160.672	-160.327	-160.584			88.3	-152.738	-154.202	-156.726	-156.753	-154.202	-155.109	-158.448	-156.605	-156.612	-156.815	-157.276	-158.001	-160.093	-158.459	-161.084	-160.282	-157.635	-156.59			88.3	-152.958	-153.973	-154.282	-155.205	-153.764	-153.119	-153.506
88.4	-149.384	-153.607	-147.038	-151.836	-153.059	-152.426	-152.5	-149.174	-150.945	-151.393	-152.267	-155.479	-149.525	-157.501	-157.919	-160.443	-159.62	-160.961			88.4	-153.278	-154.606	-157.365	-157.348	-155.11	-154.618	-158.421	-156.596	-156.615	-156.421	-157.366	-158.023	-159.873	-159.16	-160.954	-160.17	-157.289	-156.743			88.4	-153.475	-153.52	-153.463	-154.526	-153.983	-152.99	-152.601
88.5	-148.918	-154.074	-148.042	-152.051	-153.109	-151.808	-152.009	-148.644	-150.92	-150.047	-152.234	-155.067	-149.685	-157.732	-157.922	-159.533	-159.022	-161.493			88.5	-153.617	-154.513	-157.659	-157.636	-156.482	-154.353	-158.152	-156.829	-157.015	-155.933	-156.909	-157.548	-159.885	-159.733	-160.652	-160.148	-156.577	-157.131			88.5	-153.883	-153.162	-152.468	-153.458	-154.816	-153.112	-152.531
88.6	-149.375	-155.345	-149.047	-152.18	-152.343	-151.743	-152.191	-148.275	-150.358	-148.26	-151.713	-154.781	-150.234	-158.396	-157.868	-158.591	-158.773	-162.038			88.6	-153.539	-154.328	-157.648	-157.161	-157.131	-154.29	-157.681	-156.856	-157.325	-156.04	-156.375	-156.839	-159.766	-159.788	-160.344	-159.915	-156.059	-157.048			88.6	-154.071	-152.663	-152.273	-153.132	-155.769	-153.394	-153.382
88.7	-150.118	-156.706	-149.322	-152.427	-151.332	-152.139	-152.864	-148.702	-149.493	-147.275	-151.532	-154.575	-151.19	-158.807	-157.73	-158.041	-158.575	-162.558			88.7	-153.324	-154.456	-157.902	-156.387	-157.184	-154.485	-157.704	-156.641	-157.307	-157.029	-156.056	-156.492	-159.572	-159.468	-159.762	-159.538	-156.115	-156.522			88.7	-154.192	-152.357	-152.873	-153.555	-156.403	-153.838	-153.999
88.8	-150.73	-157.126	-148.827	-152.828	-150.623	-152.359	-152.769	-149.897	-149.113	-147.491	-151.953	-154.233	-152.256	-158.585	-157.546	-157.837	-158.311	-162.789			88.8	-153.138	-154.567	-158.578	-155.997	-157.076	-155.084	-158.419	-156.464	-157.03	-158.223	-155.93	-156.749	-159.664	-159.161	-158.997	-159.488	-156.304	-156.325			88.8	-154.122	-152.881	-153.451	-153.966	-156.453	-154.188	-153.806
88.9	-151.451	-156.628	-148.16	-153.042	-150.576	-152.113	-152.152	-150.707	-149.601	-148.409	-152.482	-154.103	-152.897	-158.082	-157.787	-158.195	-158.356	-162.617			88.9	-152.956	-154.264	-158.829	-156.235	-156.582	-155.848	-159.158	-156.426	-156.762	-158.872	-155.937	-157.214	-159.62	-159.116	-158.65	-159.912	-156.281	-156.886			88.9	-153.591	-153.729	-153.756	-154.194	-155.942	-154.192	-153.495
89	-152.133	-156.32	-148.407	-152.97	-151.166	-151.901	-152.045	-150.204	-150.31	-149.304	-152.876	-154.461	-152.705	-157.581	-158.278	-158.872	-158.643	-162.214			89	-152.794	-153.829	-158.07	-156.772	-155.613	-156.152	-159.372	-156.417	-156.868	-159.05	-156.098	-157.451	-158.926	-159.367	-159.115	-160.505	-156.356	-157.675			89	-152.803	-153.789	-153.917	-154.332	-155.199	-154.137	-153.678
89.1	-151.964	-156.454	-149.132	-152.811	-151.699	-152.081	-152.539	-149.051	-150.585	-149.921	-152.737	-154.773	-151.938	-157.144	-158.04	-159.377	-158.652	-161.761			89.1	-152.64	-153.922	-156.853	-157.041	-154.639	-155.89	-159.084	-156.36	-157.319	-159.092	-156.485	-157.554	-157.919	-159.687	-160.031	-160.74	-156.679	-158.099			89.1	-152.502	-152.879	-154.032	-154.088	-154.497	-154.321	-154.085
89.2	-150.855	-156.139	-149.14	-152.348	-151.637	-152.313	-153.066	-148.899	-150.602	-150.205	-151.824	-154.681	-151.27	-157.065	-157.381	-159.638	-158.435	-161.598			89.2	-152.563	-154.69	-155.961	-156.983	-154.088	-155.536	-158.794	-156.548	-157.367	-158.811	-157.172	-157.753	-157.198	-159.672	-160.438	-160.355	-157.132	-158.009			89.2	-153.125	-152.035	-154.549	-153.666	-154.164	-154.581	-154.121
89.3	-149.992	-155.422	-148.457	-151.425	-151.197	-152.42	-152.918	-149.997	-150.536	-150.241	-150.863	-154.69	-151.037	-157.456	-157.387	-159.37	-158.673	-161.718			89.3	-152.589	-155.392	-155.597	-156.894	-153.832	-155.207	-158.927	-157.287	-156.718	-157.937	-157.996	-157.91	-156.966	-159.097	-160.039	-159.827	-157.658	-157.536			89.3	-153.934	-152.224	-155.443	-153.638	-154.576	-154.86	-153.677
89.4	-150.388	-154.948	-147.621	-150.741	-150.517	-152.82	-152.175	-150.641	-150.366	-150.43	-150.703	-155.127	-151.118	-157.645	-157.729	-158.724	-159.57	-161.534			89.4	-152.62	-155.425	-155.625	-156.922	-153.723	-154.88	-159.282	-158.054	-156.077	-156.872	-158.426	-157.837	-157.05	-158.095	-159.466	-159.685	-158.136	-157.092			89.4	-153.867	-153.206	-155.772	-153.703	-155.671	-155.302	-153.353
89.5	-151.453	-154.841	-146.99	-150.965	-149.894	-153.356	-151.937	-149.948	-150.258	-150.861	-151.527	-155.335	-151.389	-157.169	-157.689	-158.276	-160.431	-160.87			89.5	-152.726	-155.334	-155.858	-157.038	-154.07	-154.799	-159.478	-158.227	-155.996	-156.393	-157.881	-157.506	-157.338	-157.2	-159.006	-159.736	-158.43	-156.877			89.5	-153.247	-154.178	-154.948	-153.727	-156.648	-155.531	-153.651
89.6	-152.05	-155.076	-146.757	-151.516	-150.161	-153.216	-152.907	-148.854	-149.96	-150.93	-152.634	-154.941	-151.879	-156.615	-157.36	-157.971	-160.599	-160.384			89.6	-152.88	-155.797	-156.063	-157.122	-154.793	-154.893	-159.511	-157.953	-156.317	-156.765	-156.719	-157.018	-157.804	-157.09	-158.673	-159.436	-158.357	-156.858			89.6	-152.922	-154.687	-153.644	-154.187	-156.719	-155.343	-154.205
89.7	-151.836	-155.552	-146.615	-151.426	-151.338	-152.668	-154.401	-148.481	-149.291	-150.352	-153.003	-154.456	-152.246	-156.616	-156.871	-157.705	-159.957	-160.538			89.7	-152.688	-156.387	-155.96	-157.306	-155.133	-154.874	-159.481	-157.614	-156.706	-157.678	-156.159	-156.668	-158.292	-157.938	-158.669	-158.723	-157.81	-156.942			89.7	-152.691	-154.504	-152.897	-154.547	-155.882	-155.195	-154.381
89.8	-151.147	-155.609	-146.269	-150.79	-152.14	-152.714	-154.796	-148.856	-148.908	-149.511	-152.544	-154.224	-152.202	-157.413	-156.055	-157.974	-158.726	-160.869			89.8	-152.365	-156.475	-155.47	-157.651	-154.811	-154.81	-159.262	-157.352	-157.018	-158.566	-156.669	-156.788	-158.668	-158.982	-159.037	-158.26	-157.103	-157.003			89.8	-152.246	-153.662	-152.771	-154	-154.735	-154.979	-154.363
89.9	-150.72	-154.899	-146.046	-150.449	-151.416	-153.587	-153.553	-149.095	-149.316	-148.869	-151.92	-154.38	-151.841	-158.585	-154.988	-158.862	-157.512	-160.877			89.9	-152.696	-156.071	-155.132	-157.726	-154.449	-155.084	-158.966	-157.211	-157.207	-158.981	-157.52	-157.623	-158.706	-159.357	-159.474	-158.57	-156.718	-157.244			89.9	-151.917	-152.804	-152.887	-153.085	-154.169	-154.318	-154.761
90	-151.013	-154.245	-146.539	-150.914	-149.743	-154.343	-151.99	-148.817	-150.227	-148.619	-151.67	-155.068	-151.081	-158.969	-154.637	-159.562	-157.131	-160.45			90	-153.433	-155.271	-155.546	-157.27	-154.476	-155.642	-158.985	-157.092	-156.954	-158.742	-157.987	-158.725	-158.193	-159.128	-159.585	-159.301	-156.809	-157.73			90	-151.855	-152.693	-152.979	-152.745	-154.596	-153.54	-155.377
90.1	-151.57	-154.361	-147.363	-151.79	-148.718	-154.042	-151.347	-148.449	-150.931	-148.702	-151.666	-155.804	-150.193	-158.329	-155.857	-159.565	-157.872	-159.899			90.1	-153.7	-154.365	-156.436	-156.549	-154.544	-156.133	-159.245	-156.859	-156.195	-158.002	-157.966	-159.205	-157.559	-158.882	-159.453	-160.125	-157.258	-158.013			90.1	-151.912	-153.471	-152.757	-152.842	-155.236	-153.284	-155.478
90.2	-151.787	-154.718	-147.889	-152.113	-148.64	-153.35	-151.772	-148.266	-151.026	-149.114	-151.498	-155.845	-149.952	-157.448	-157.734	-159.142	-159.116	-160.152			90.2	-153.533	-154.016	-157.109	-155.996	-154.569	-156.555	-159.269	-156.689	-155.388	-157.439	-157.673	-159.019	-157.506	-158.945	-159.34	-160.994	-157.866	-157.929			90.2	-152.182	-154.521	-152.589	-152.706	-155.188	-153.908	-155.09
90.3	-151.662	-154.76	-148.542	-151.533	-148.837	-153.391	-152.534	-148.448	-151.112	-149.586	-151.245	-155.316	-150.298	-156.709	-158.499	-158.697	-159.927	-161.389			90.3	-153.217	-154.395	-157.415	-155.769	-154.83	-156.937	-159.338	-156.711	-155.155	-157.564	-157.176	-158.694	-157.898	-159.299	-159.293	-161.447	-158.401	-157.712			90.3	-152.855	-154.935	-152.922	-152.589	-154.493	-154.968	-154.803
90.4	-151.398	-154.512	-149.368	-150.661	-149.376	-153.913	-152.86	-149.31	-151.848	-149.803	-151.207	-154.877	-150.407	-156.219	-157.695	-158.456	-159.97	-162.238			90.4	-152.639	-154.69	-157.643	-155.769	-155.32	-157.079	-159.917	-156.624	-155.747	-158.078	-156.351	-158.195	-158.198	-159.757	-159.192	-161.061	-158.627	-157.659			90.4	-153.765	-154.605	-153.304	-153.2	-153.846	-155.64	-154.651
90.5	-150.832	-153.955	-149.369	-150.399	-150.261	-154.029	-152.748	-150.651	-152.294	-150.031	-151.503	-154.834	-150.182	-156.612	-156.315	-158.257	-159.769	-161.817			90.5	-152.096	-154.301	-157.879	-156.099	-155.67	-156.68	-160.361	-156.538	-156.608	-158.449	-155.612	-157.285	-158.299	-160.152	-159.21	-159.953	-158.277	-157.94			90.5	-154.599	-154.372	-153.298	-154.282	-153.885	-155.863	-154.361
90.6	-150.195	-153.541	-148.508	-150.815	-150.657	-153.842	-152.526	-151.616	-151.579	-150.553	-152.009	-155.011	-150.309	-157.964	-155.669	-158.116	-159.864	-161.104			90.6	-151.987	-153.876	-157.872	-156.724	-155.605	-155.56	-160.233	-156.97	-156.794	-158.419	-155.736	-156.332	-158.326	-160.424	-159.806	-158.826	-157.494	-158.474			90.6	-155.141	-154.657	-153.18	-155.013	-154.62	-155.886	-153.818
90.7	-150.324	-153.994	-148.026	-150.952	-150.397	-153.881	-152.331	-151.706	-150.544	-150.872	-152.071	-155.095	-150.998	-158.782	-156.017	-158.465	-159.834	-161.105			90.7	-151.952	-154.18	-157.492	-157.264	-155.476	-154.162	-159.956	-157.641	-156.228	-158.149	-156.606	-155.959	-158.371	-160.567	-160.629	-158.319	-156.898	-158.968			90.7	-155.279	-154.793	-153.022	-155.11	-155.402	-155.629	-153.21
90.8	-151.287	-154.932	-148.544	-150.587	-150.547	-153.861	-152.349	-151.536	-150.319	-150.365	-151.326	-154.903	-151.704	-157.79	-156.693	-159.096	-159.168	-161.652			90.8	-151.599	-154.816	-156.909	-157.443	-155.716	-153.297	-159.686	-157.757	-155.757	-157.864	-157.386	-156.111	-158.583	-160.599	-160.876	-158.495	-156.682	-159.043			90.8	-154.832	-154.115	-152.506	-154.808	-155.491	-155.136	-153.145
90.9	-152.004	-155.61	-149.226	-150.413	-151.462	-153.512	-152.398	-151.707	-151.245	-149.329	-150.645	-154.604	-152.192	-155.859	-157.425	-159.299	-158.642	-162.212			90.9	-151.142	-154.976	-156.389	-157.414	-156.055	-153.074	-159.301	-157.224	-155.719	-157.584	-157.571	-156.397	-158.712	-160.563	-160.476	-159.22	-156.559	-158.493			90.9	-153.87	-153.126	-152.174	-154.585	-154.704	-154.657	-153.756
91	-151.638	-156.017	-149.156	-150.589	-152.651	-153.161	-151.944	-151.859	-152.729	-148.561	-150.626	-154.622	-152.655	-154.848	-158.247	-159.125	-159.331	-162.29			91	-150.839	-154.62	-156.203	-157.572	-156.113	-153.13	-158.987	-156.603	-155.674	-157.304	-156.945	-156.849	-158.356	-160.296	-160.065	-160.092	-156.411	-157.588			91	-153.15	-152.795	-152.854	-154.606	-153.698	-154.419	-154.637
91.1	-150.617	-156.162	-148.799	-150.648	-153.723	-153.165	-151.393	-151.559	-153.721	-148.433	-150.909	-154.796	-152.851	-155.278	-158.986	-158.909	-160.518	-161.517			91.1	-150.593	-154.316	-156.584	-157.821	-156.175	-153.511	-159.031	-156.312	-155.559	-156.94	-155.781	-157.392	-157.995	-159.819	-160.108	-160.449	-156.485	-157.03			91.1	-153.111	-153.389	-153.996	-154.448	-153.394	-154.526	-155.407
91.2	-150.179	-155.75	-148.71	-150.486	-154.003	-153.35	-151.759	-151.21	-153.688	-148.807	-151.54	-154.609	-152.166	-156.329	-159.232	-158.472	-160.572	-160.536			91.2	-150.37	-154.422	-157.352	-157.564	-156.481	-154.03	-159.458	-156.154	-155.853	-156.573	-155.16	-157.489	-158.101	-159.579	-160.289	-160.329	-156.998	-157.355			91.2	-153.31	-154.431	-154.735	-153.836	-154.044	-154.976	-155.432
91.3	-150.574	-155.289	-148.382	-150.683	-153.222	-153.279	-152.933	-151.3	-153.086	-149.456	-152.458	-154.116	-150.871	-157.505	-158.627	-158.245	-159.616	-160.541			91.3	-150.344	-154.752	-157.813	-156.802	-156.625	-154.089	-159.706	-155.948	-156.572	-156.706	-155.819	-157.051	-158.243	-159.707	-160.225	-160.442	-157.858	-158.255			91.3	-153.397	-155.07	-155.206	-153.142	-155.184	-155.491	-154.405
91.4	-150.826	-155.596	-147.66	-151.578	-152.025	-153.282	-153.645	-151.757	-152.703	-149.974	-152.69	-153.834	-150.191	-158.564	-157.752	-159.023	-158.811	-161.353			91.4	-150.444	-154.96	-157.464	-156.5	-156.464	-153.813	-159.07	-156.032	-156.936	-157.492	-157.13	-156.712	-158.206	-159.802	-159.875	-160.82	-158.608	-158.718			91.4	-153.207	-154.83	-155.293	-153.055	-156.12	-155.647	-153.138
91.5	-150.425	-156.12	-147.445	-152.437	-150.901	-153.622	-153.513	-152.379	-152.569	-149.809	-151.886	-153.891	-150.522	-158.946	-157.419	-160.308	-158.396	-161.91			91.5	-150.545	-154.997	-156.613	-157.108	-156.429	-153.932	-157.86	-156.626	-156.411	-158.382	-158.128	-156.78	-158.172	-159.6	-159.425	-160.737	-158.645	-158.368			91.5	-152.564	-154.234	-154.594	-153.872	-156.345	-155.323	-152.481
91.6	-150.1	-155.793	-148.21	-152.139	-149.994	-153.787	-153.403	-152.778	-152.199	-149.207	-150.974	-153.865	-150.956	-158.483	-157.23	-161.126	-158.232	-162.173			91.6	-151.162	-154.988	-156.066	-157.68	-156.36	-154.746	-157.075	-157.196	-155.618	-158.784	-158.58	-157.091	-158.006	-159.185	-159.182	-160.198	-158.118	-157.654			91.6	-151.918	-153.847	-153.875	-154.898	-155.843	-154.826	-152.557
91.7	-150.604	-154.877	-149.271	-151.023	-149.537	-153.849	-153.218	-152.511	-151.561	-149.123	-150.632	-153.672	-150.759	-157.318	-156.85	-161.424	-158.436	-162.462			91.7	-152.557	-155.049	-156.153	-157.403	-155.888	-155.532	-157.104	-157.226	-155.493	-158.532	-158.513	-157.595	-157.682	-158.842	-159.185	-159.964	-157.798	-156.848			91.7	-151.932	-153.358	-154.111	-155.067	-154.996	-154.616	-153.304
91.8	-151.336	-154.332	-149.799	-150.736	-149.51	-154.147	-152.213	-151.785	-151.026	-149.78	-150.761	-153.866	-150.194	-155.99	-156.862	-161.617	-159.035	-162.398			91.8	-153.634	-155.18	-156.527	-156.833	-155.567	-155.647	-157.655	-156.999	-155.974	-157.894	-157.879	-158.123	-157.581	-158.937	-159.313	-160.087	-157.869	-156.046			91.8	-152.477	-152.591	-154.578	-154.203	-154.155	-154.807	-154.299
91.9	-151.296	-154.226	-149.687	-151.714	-149.536	-154.024	-151.155	-151.065	-150.675	-150.343	-151.283	-154.638	-150.17	-155.488	-157.288	-161.572	-159.949	-161.891			91.9	-153.281	-155.037	-156.807	-156.802	-155.881	-155.22	-158.457	-156.861	-156.337	-157.425	-157.007	-158.425	-157.807	-159.468	-159.491	-160.252	-158.045	-155.706			91.9	-152.989	-152.31	-154.28	-153.436	-153.651	-154.919	-154.883
92	-150.664	-154.115	-149.328	-152.599	-149.525	-152.807	-151.09	-150.657	-150.599	-150.494	-152.092	-155.539	-150.78	-156.42	-157.372	-160.907	-160.924	-161.371			92	-151.882	-154.37	-156.737	-157.343	-156.342	-154.669	-159.369	-156.691	-156.42	-157.296	-156.364	-158.513	-158.129	-159.944	-159.544	-160.529	-158.311	-156.119			92	-153.261	-152.9	-153.777	-153.794	-153.828	-154.491	-154.898
92.1	-149.931	-153.946	-148.791	-152.56	-149.967	-151.326	-151.541	-150.739	-151.032	-150.728	-152.797	-156.112	-150.834	-158.215	-156.785	-159.862	-161.42	-160.972			92.1	-150.482	-153.82	-156.191	-157.984	-156.504	-154.472	-159.991	-156.53	-156.688	-157.291	-156.048	-158.431	-158.459	-160.131	-159.439	-160.771	-158.614	-156.894			92.1	-153.492	-153.71	-153.766	-154.619	-154.448	-153.748	-154.7
92.2	-149.351	-153.991	-148.093	-152.067	-151.132	-150.851	-151.695	-150.735	-151.707	-151.194	-152.983	-156.052	-149.898	-159.357	-155.835	-159.03	-161.107	-160.719			92.2	-149.576	-154.025	-155.475	-158.195	-156.43	-154.566	-159.953	-156.508	-157.386	-157.382	-156.094	-158.215	-158.855	-160.02	-159.159	-160.881	-158.867	-157.609			92.2	-153.913	-154.257	-153.783	-154.665	-154.891	-153.301	-154.824
92.3	-149.426	-154.533	-147.743	-151.735	-152.231	-151.584	-151.863	-150.038	-152.036	-151.318	-152.464	-155.522	-149.263	-158.675	-155.164	-158.614	-160.173	-160.733			92.3	-149.349	-154.462	-155.184	-157.643	-156.329	-154.45	-159.457	-156.483	-158.01	-157.538	-156.536	-157.958	-159.185	-159.471	-158.743	-160.858	-159.082	-158.174			92.3	-154.328	-154.666	-153.3	-154.087	-154.983	-153.65	-155.347
92.4	-150.271	-155.442	-147.822	-151.74	-152.347	-152.76	-152.524	-149.282	-151.692	-150.601	-151.717	-155.162	-149.933	-156.97	-155.599	-158.26	-159.132	-161.095			92.4	-149.687	-154.449	-155.728	-156.923	-156.293	-154.226	-158.82	-156.399	-157.814	-157.725	-157.145	-157.674	-159.401	-158.614	-158.502	-160.225	-158.995	-158.518			92.4	-154.354	-154.775	-152.608	-153.732	-154.916	-154.615	-155.51
92.5	-151.26	-156.032	-147.862	-151.947	-151.897	-153.646	-153.273	-149.026	-151.078	-149.629	-151.482	-155.032	-150.783	-156.26	-156.902	-157.751	-158.494	-161.756			92.5	-150.143	-154.228	-156.734	-156.905	-156.264	-154.18	-158.089	-156.497	-156.768	-157.859	-157.486	-157.543	-159.495	-157.981	-158.579	-159.057	-158.684	-158.67			92.5	-154.18	-154.203	-152.271	-153.522	-154.778	-155.493	-154.966
92.6	-151.67	-155.76	-147.676	-152.031	-151.614	-154.091	-153.427	-148.843	-150.783	-149.394	-151.916	-154.672	-150.697	-156.933	-157.677	-157.735	-158.523	-162.191			92.6	-150.58	-154.252	-157.408	-157.256	-156.483	-154.128	-157.335	-157.001	-155.784	-157.659	-157.279	-157.634	-159.178	-158.205	-158.897	-158.294	-158.81	-158.758			92.6	-154.038	-153.168	-152.461	-153.152	-154.601	-155.979	-154.365
92.7	-151.721	-155.132	-147.476	-151.644	-151.24	-154.217	-152.854	-148.595	-150.478	-149.839	-152.354	-154.232	-150.52	-157.564	-157.315	-158.423	-158.914	-161.833			92.7	-151.052	-154.395	-157.544	-157.074	-157.203	-154.052	-156.69	-157.633	-155.707	-157.439	-156.68	-157.613	-158.401	-159.129	-159.31	-158.335	-159.319	-158.715			92.7	-153.743	-152.446	-152.918	-152.99	-154.532	-156.188	-153.86
92.8	-152.275	-154.935	-147.502	-150.78	-150.631	-154.126	-152.116	-148.661	-149.719	-150.062	-152.266	-154.184	-151.166	-157.407	-156.829	-159.024	-158.863	-161.108			92.8	-151.397	-154.476	-157.507	-156.265	-157.965	-154.254	-156.288	-158.045	-156.395	-157.833	-156.073	-157.387	-157.724	-159.676	-159.596	-158.88	-159.549	-158.316			92.8	-153.396	-152.58	-153.193	-153.238	-154.705	-156.299	-153.159
92.9	-153.106	-155.204	-147.965	-149.86	-150.193	-154.001	-151.93	-149.259	-148.996	-149.82	-152.04	-154.447	-152.106	-157.029	-157.056	-159.181	-158.314	-160.706			92.9	-151.564	-154.589	-157.408	-155.546	-158.182	-154.707	-156.342	-158.39	-157.161	-158.468	-155.736	-157.273	-157.639	-159.369	-159.803	-159.539	-159.428	-157.747			92.9	-153.465	-153.446	-153.213	-153.568	-154.909	-156.43	-152.87
93	-153.152	-155.449	-148.993	-149.321	-150.446	-153.997	-152.268	-150.309	-148.84	-149.583	-152.24	-154.502	-152.476	-157.032	-157.308	-159.253	-158.412	-160.481			93	-151.664	-154.723	-157.136	-155.601	-157.585	-155.228	-156.921	-158.779	-157.201	-158.555	-155.716	-157.341	-157.856	-158.788	-160.125	-159.995	-159.043	-157.525			93	-153.937	-154.369	-153.458	-153.747	-154.826	-156.259	-153.734
93.1	-152.174	-155.139	-149.782	-149.251	-151.586	-154.042	-152.525	-151.348	-149.336	-149.646	-152.492	-154.121	-152.158	-157.577	-156.936	-159.385	-159.843	-160.382			93.1	-151.69	-154.791	-156.961	-156.575	-156.189	-155.77	-157.731	-158.929	-156.503	-158.18	-155.955	-157.351	-157.908	-158.601	-160.199	-160.261	-158.381	-157.783			93.1	-154.161	-154.71	-154.045	-153.798	-154.588	-155.349	-155.244
93.2	-150.741	-154.229	-149.373	-149.619	-152.88	-153.64	-152.45	-151.845	-150.466	-150.241	-152.22	-153.548	-151.485	-158.255	-156.641	-159.248	-161.399	-160.92			93.2	-151.716	-154.882	-156.923	-157.737	-154.685	-156.373	-158.354	-158.436	-156.313	-157.735	-156.491	-157.004	-157.965	-158.893	-159.752	-160.36	-157.959	-158.133			93.2	-154.034	-154.538	-154.559	-153.882	-154.492	-154.093	-156.07
93.3	-149.329	-153.587	-148.579	-150.438	-153.499	-152.792	-152.096	-151.886	-151.465	-151.154	-152.013	-153.203	-150.914	-158.298	-157.012	-158.894	-161.599	-162.022			93.3	-151.936	-154.888	-156.53	-158.116	-154.068	-156.944	-158.637	-157.452	-157.359	-157.31	-157.254	-156.277	-158.263	-159.307	-159.402	-160.123	-158.263	-158.313			93.3	-154.232	-154.228	-154.83	-154.112	-154.515	-153.4	-155.437
93.4	-148.5	-153.925	-148.188	-151.167	-153.869	-152.723	-151.524	-151.949	-151.35	-151.658	-152.284	-153.462	-150.818	-157.582	-157.556	-159	-160.787	-163.021			93.4	-152.197	-154.703	-155.812	-157.787	-154.429	-157.099	-158.69	-156.684	-158.606	-157.058	-157.64	-155.698	-158.591	-159.619	-159.556	-159.585	-158.964	-158.371			93.4	-154.761	-153.897	-154.928	-154.159	-154.502	-153.455	-153.921
93.5	-148.788	-154.63	-147.774	-151.413	-154.41	-153.892	-151.117	-152.083	-150.597	-151.726	-152.27	-154.26	-150.956	-156.712	-157.649	-159.846	-160.029	-163.285			93.5	-152.3	-154.548	-155.263	-157.522	-154.925	-156.58	-158.725	-156.368	-158.811	-157.243	-157.327	-155.851	-158.569	-159.691	-159.893	-159.339	-159.401	-158.353			93.5	-154.884	-153.498	-155.062	-153.715	-154.572	-153.83	-152.817
93.6	-150.013	-154.876	-147.424	-151.621	-154.015	-155.072	-151.223	-152.099	-150.456	-151.427	-151.663	-154.982	-151.151	-156.284	-157.382	-160.697	-159.649	-162.267			93.6	-152.457	-154.352	-154.911	-157.477	-154.863	-155.743	-158.683	-156.375	-158.062	-158.015	-156.781	-156.681	-158.162	-159.582	-160.037	-159.716	-159.274	-158.208			93.6	-154.63	-153.06	-155.315	-153.357	-154.824	-154.162	-152.886
93.7	-151.336	-154.984	-147.606	-151.874	-152.286	-155.373	-151.603	-152.019	-151.273	-150.329	-151.278	-155.219	-151.555	-156.709	-157.39	-160.776	-159.494	-160.462			93.7	-152.668	-154.178	-154.596	-157.334	-154.432	-155.28	-158.288	-156.754	-157.131	-159.115	-156.484	-157.573	-157.844	-159.708	-159.753	-160.132	-158.864	-158.012			93.7	-154.666	-152.799	-155.312	-153.705	-154.973	-154.074	-153.632
93.8	-151.748	-155.334	-148.329	-151.79	-150.784	-155.071	-151.97	-151.942	-152.143	-148.77	-151.94	-155.011	-151.501	-157.477	-157.95	-160.264	-159.527	-159.308			93.8	-152.546	-154.524	-154.39	-157.032	-154.552	-155.32	-157.664	-157.156	-156.304	-159.622	-156.478	-158.043	-157.88	-160.046	-159.17	-159.978	-158.563	-157.932			93.8	-154.818	-152.941	-154.851	-154.394	-154.858	-153.683	-153.825
93.9	-151.11	-155.37	-149.545	-151.502	-150.646	-154.336	-152.387	-152.019	-152.203	-147.916	-153.428	-154.568	-150.286	-157.478	-158.433	-159.918	-159.795	-159.205			93.9	-152.006	-155.219	-154.244	-156.739	-155.373	-155.489	-157.329	-157.142	-155.673	-158.857	-156.579	-158.146	-158.05	-160.028	-158.947	-159.349	-158.451	-157.907			93.9	-154.362	-153.478	-154.511	-154.929	-154.758	-153.99	-153.176
94	-150.579	-154.933	-150.863	-151.342	-151.62	-153.156	-152.726	-152.213	-151.994	-148.128	-154.438	-154.269	-148.686	-156.972	-158.044	-160.009	-159.994	-159.562			94	-151.547	-155.462	-154.305	-156.505	-155.837	-155.649	-157.411	-157.025	-155.62	-157.464	-156.696	-158.216	-158.159	-159.626	-159.476	-158.514	-158.521	-157.959			94	-153.277	-154.171	-154.59	-155.196	-154.869	-155.208	-152.753
94.1	-150.837	-154.473	-151.426	-151.204	-152.57	-152.018	-152.676	-152.051	-152.084	-148.931	-154.08	-154.535	-148.087	-157.188	-157.036	-160.109	-159.704	-160.216			94.1	-151.464	-155.066	-155.046	-156.229	-155.824	-155.814	-157.406	-157.257	-156.153	-156.774	-156.768	-158.098	-157.993	-159.323	-160.305	-157.679	-158.757	-158.203			94.1	-152.147	-154.705	-154.644	-155.105	-154.859	-156.078	-153.31
94.2	-151.194	-154.015	-151.009	-150.897	-152.705	-151.42	-152.465	-151.262	-151.961	-149.774	-153.072	-155.157	-148.887	-158.225	-156.331	-159.939	-159.13	-161.179			94.2	-151.536	-154.475	-156.258	-156.013	-156.372	-155.937	-157.139	-157.659	-156.82	-157.233	-156.612	-157.663	-157.651	-159.214	-160.856	-157.344	-159.066	-158.423			94.2	-151.406	-154.653	-154.492	-154.717	-154.555	-155.963	-154.274
94.3	-151.236	-153.702	-150.144	-150.867	-152.493	-151.438	-152.404	-150.349	-151.344	-150.166	-152.598	-155.275	-150.462	-158.941	-156.251	-159.826	-158.801	-161.979			94.3	-151.696	-154.111	-157.239	-156.196	-157.254	-155.967	-157.136	-157.808	-157.524	-157.881	-156.117	-157.556	-157.702	-158.919	-161.234	-157.848	-159.354	-158.344			94.3	-151.44	-154.238	-154.429	-154.388	-154.383	-155.622	-154.686
94.4	-151.309	-153.991	-149.297	-151.38	-152.315	-151.994	-152.305	-149.847	-150.532	-150.121	-152.61	-154.576	-151.762	-158.606	-156.512	-159.943	-158.784	-162.541			94.4	-151.925	-154.387	-157.798	-156.735	-157.224	-155.903	-157.635	-157.655	-158.293	-157.748	-155.409	-158.091	-158.16	-158.406	-161.563	-158.774	-159.549	-158.049			94.4	-152.353	-154.513	-154.576	-154.35	-154.41	-155.608	-154.351
94.5	-151.305	-154.413	-148.815	-151.872	-151.822	-152.785	-152.143	-149.752	-149.929	-149.824	-152.514	-153.725	-151.973	-157.787	-156.7	-159.923	-159.116	-162.973			94.5	-151.938	-155.236	-157.862	-157.107	-156.331	-155.892	-158.306	-157.432	-158.719	-157.08	-154.929	-158.743	-158.377	-158.095	-161.457	-159.487	-159.561	-157.865			94.5	-153.453	-155.465	-154.657	-154.523	-154.374	-155.647	-153.717
94.6	-150.834	-154.146	-148.778	-152.162	-150.947	-153.329	-151.902	-150.194	-150.06	-149.048	-152.356	-153.519	-151.327	-157.208	-156.844	-159.686	-159.841	-162.768			94.6	-151.601	-155.877	-157.44	-157.043	-155.51	-156.066	-158.835	-157.265	-158.378	-156.472	-155.165	-158.992	-158.161	-158.055	-160.9	-159.958	-159.473	-157.888			94.6	-153.999	-155.764	-154.581	-154.638	-154.635	-155.408	-153.268
94.7	-150.173	-153.04	-148.964	-152.48	-150.365	-153.675	-151.339	-151.005	-150.996	-148.149	-152.271	-154.195	-150.796	-156.897	-157.289	-159.65	-160.529	-161.805			94.7	-151.351	-155.741	-156.852	-156.813	-155.003	-156.331	-159.144	-157.052	-157.522	-156.11	-156.009	-158.536	-157.924	-158.231	-160.316	-160.439	-159.449	-157.915			94.7	-154.106	-155.059	-154.55	-154.512	-155.36	-155.126	-153.256
94.8	-150.057	-151.532	-148.993	-152.382	-150.76	-153.872	-150.589	-151.109	-152.054	-147.957	-152.471	-155.031	-150.693	-156.659	-157.86	-159.938	-160.98	-160.917			94.8	-151.746	-154.871	-156.476	-156.701	-154.75	-156.364	-159.233	-156.577	-156.744	-156.231	-156.884	-157.474	-158.075	-158.928	-159.854	-160.846	-159.363	-157.804			94.8	-154.108	-154.32	-154.457	-154.449	-155.859	-155.136	-153.498
94.9	-150.797	-150.572	-148.754	-151.589	-151.783	-153.661	-150.19	-150.09	-152.614	-148.5	-153.088	-154.803	-150.575	-156.776	-158.133	-160.128	-161.266	-160.83			94.9	-152.396	-153.89	-156.628	-156.682	-154.751	-156.15	-159.096	-156.01	-156.243	-156.936	-157.32	-156.546	-158.554	-160.133	-159.638	-160.934	-159.141	-157.489			94.9	-153.884	-154.104	-154.065	-154.583	-155.693	-155.298	-153.696
95	-151.831	-151.072	-148.662	-150.773	-152.475	-153.437	-150.452	-149.04	-152.71	-149.17	-153.436	-153.573	-150.613	-157.576	-158.176	-159.67	-161.286	-161.463			95	-152.499	-153.555	-157.392	-156.701	-154.785	-155.969	-158.859	-156.128	-155.896	-157.68	-157.158	-156.383	-158.708	-161.188	-159.747	-160.594	-159.069	-157.044			95	-153.482	-154.133	-153.684	-154.373	-155.126	-155.289	-153.992
95.1	-152.416	-152.699	-148.921	-150.677	-152.618	-153.39	-150.941	-148.864	-152.527	-149.451	-153.112	-152.892	-151.38	-158.457	-158.304	-158.865	-161.022	-162.011			95.1	-152.219	-153.836	-158.437	-156.995	-154.647	-155.809	-158.638	-156.883	-155.697	-157.951	-156.527	-156.775	-158.081	-161.272	-159.908	-159.861	-159.025	-156.579			95.1	-153.426	-154.158	-153.85	-153.688	-154.464	-155.137	-154.477
95.2	-152.635	-154.065	-149.082	-151.393	-152.868	-153.023	-151.181	-149.534	-152.152	-149.026	-152.55	-153.69	-152.171	-158.662	-158.578	-158.723	-160.54	-161.937			95.2	-152.273	-154.153	-159.154	-157.591	-154.208	-155.81	-158.564	-157.256	-155.758	-157.837	-155.869	-157.089	-157.285	-160.108	-159.903	-158.989	-158.482	-156.177			95.2	-153.745	-154.404	-154.653	-153.059	-153.902	-154.949	-154.759
95.3	-152.838	-154.486	-148.949	-152.281	-153.339	-152.621	-151.486	-150.719	-151.608	-148.24	-151.933	-155.066	-151.778	-158.322	-158.975	-159.294	-160.016	-161.413			95.3	-152.641	-154.205	-159.134	-157.94	-153.645	-156.512	-158.697	-157.065	-155.998	-157.803	-155.612	-157.205	-157.133	-158.572	-159.893	-158.55	-157.695	-156.07			95.3	-153.867	-154.71	-155.439	-152.85	-153.748	-154.536	-154.585
95.4	-152.828	-154.233	-149.053	-152.942	-153.152	-152.859	-152.098	-151.727	-150.821	-148.158	-151.108	-155.651	-150.5	-157.916	-159.382	-159.577	-159.97	-160.704			95.4	-152.821	-154.143	-158.457	-157.682	-153.565	-157.518	-158.732	-156.833	-156.097	-158.227	-156.007	-157.37	-157.544	-158.03	-159.947	-158.804	-157.55	-156.597			95.4	-153.431	-154.471	-155.405	-152.936	-153.951	-154.252	-154.264
95.5	-152.257	-153.66	-149.408	-153.634	-151.973	-153.584	-152.57	-151.772	-150.153	-149.367	-150.263	-155.333	-149.928	-157.539	-159.331	-159.103	-160.563	-160.233			95.5	-152.814	-154.247	-157.638	-157.085	-154.089	-157.452	-158.372	-156.728	-155.988	-158.862	-156.858	-157.658	-157.823	-158.832	-159.936	-159.107	-158.227	-157.676			95.5	-152.801	-153.962	-154.75	-152.899	-154.218	-154.852	-154.279
95.6	-151.422	-152.982	-149.173	-153.977	-150.719	-154.161	-152.743	-151.251	-150.229	-150.967	-149.926	-154.936	-150.806	-157.225	-158.646	-158.687	-161.17	-160.266			95.6	-152.872	-154.752	-157.199	-156.593	-154.628	-156.167	-157.954	-156.79	-155.848	-159.078	-157.528	-158.124	-157.639	-160.258	-160.163	-158.915	-159.201	-158.865			95.6	-152.634	-153.896	-154.16	-152.74	-154.633	-155.968	-154.374
95.7	-151.289	-152.646	-148.494	-153.36	-150.144	-153.918	-152.711	-151.269	-150.982	-151.643	-150.169	-154.82	-152.187	-157.115	-158.009	-159.197	-161.169	-160.651			95.7	-153.028	-155.391	-157.445	-156.605	-154.805	-155.114	-158.064	-156.984	-155.694	-158.537	-157.645	-158.686	-157.449	-161.3	-160.684	-158.612	-159.836	-159.734			95.7	-152.908	-154.232	-153.904	-152.747	-155.168	-156.574	-153.958
95.8	-152.056	-152.977	-148.665	-152.388	-150.326	-152.81	-152.158	-151.738	-151.852	-151.238	-150.718	-154.724	-152.774	-157.285	-157.939	-160.239	-160.564	-161.561			95.8	-153.239	-155.521	-158.187	-157.322	-154.82	-155.126	-158.48	-157.188	-155.559	-157.677	-157.414	-158.822	-157.689	-161.153	-160.847	-158.756	-159.735	-159.851			95.8	-153.012	-154.635	-154.175	-152.652	-155.247	-156.522	-153.324
95.9	-152.473	-153.291	-149.522	-151.908	-150.836	-151.726	-151.265	-151.818	-152.519	-150.524	-151.592	-154.646	-152.275	-157.935	-158.186	-160.517	-159.763	-162.544			95.9	-153.489	-155.113	-158.601	-158.18	-154.842	-155.658	-158.618	-157.319	-155.612	-157.432	-157.214	-158.436	-158.209	-159.825	-160.41	-159.176	-159.138	-159.077			95.9	-152.824	-155.108	-154.918	-152.428	-154.664	-156.163	-153.205
96	-151.53	-152.996	-149.58	-151.89	-150.84	-151.778	-150.996	-151.394	-152.677	-149.92	-152.41	-154.724	-151.303	-158.798	-158.342	-159.352	-159.299	-162.749			96	-153.816	-154.574	-158.346	-158.256	-154.797	-156.041	-158.732	-157.166	-155.665	-157.83	-157.273	-158.285	-158.771	-158.398	-159.78	-159.166	-158.558	-158.045			96	-152.886	-155.52	-155.442	-152.786	-154.114	-155.716	-153.656
96.1	-150.016	-152.471	-148.945	-152.07	-150.235	-153.188	-151.334	-150.779	-152.302	-149.018	-152.279	-154.861	-150.369	-158.863	-158.489	-157.846	-159.548	-162.38			96.1	-154.178	-154.299	-158.046	-157.621	-154.796	-156.018	-159.123	-156.724	-155.46	-158.031	-157.433	-158.832	-159.177	-157.873	-159.317	-158.821	-158.248	-157.59			96.1	-153.282	-155.626	-155.37	-153.631	-154.302	-155.599	-153.95
96.2	-149.392	-152.275	-148.841	-152.291	-149.662	-154.671	-151.369	-150.032	-151.97	-147.899	-151.324	-154.748	-149.254	-158.146	-158.966	-157.626	-160.392	-161.842			96.2	-154.151	-154.799	-158.241	-157.161	-154.812	-155.751	-159.303	-156.517	-155.38	-157.703	-157.195	-159.548	-159.186	-158.168	-159.255	-158.884	-158.147	-157.676			96.2	-153.667	-155.688	-155.117	-154.074	-155.056	-155.89	-153.602
96.3	-149.757	-152.623	-148.999	-152.414	-149.845	-154.794	-151.215	-149.243	-151.796	-147.481	-150.831	-154.406	-147.953	-157.922	-159.79	-158.507	-161.287	-161.18			96.3	-153.357	-155.674	-158.84	-157.092	-154.52	-155.708	-158.831	-156.742	-155.815	-157.112	-156.589	-159.508	-158.906	-158.636	-159.51	-159.422	-158.095	-157.602			96.3	-153.968	-155.794	-155.055	-154.201	-155.614	-155.92	-153.311
96.4	-150.344	-152.917	-148.527	-152.609	-151.127	-153.932	-151.445	-148.881	-151.502	-148.085	-151.458	-154.253	-147.245	-158.182	-160.682	-159.322	-161.368	-160.612			96.4	-152.178	-155.708	-159.525	-156.992	-154.159	-156.043	-158.046	-156.982	-156.419	-156.779	-156.444	-158.372	-158.709	-158.933	-159.693	-159.906	-158.297	-157.475			96.4	-154.195	-155.516	-155.13	-154.501	-155.681	-155.438	-153.846
96.5	-150.645	-152.528	-148.034	-153.152	-152.506	-153.509	-151.635	-149.148	-151.578	-149.343	-152.506	-154.347	-147.601	-158.089	-161.132	-159.772	-160.586	-160.3			96.5	-151.42	-154.856	-159.874	-157.023	-154.211	-156.402	-157.656	-156.857	-156.646	-157.186	-157.015	-156.769	-158.758	-159.042	-159.768	-159.845	-158.825	-157.876			96.5	-154.409	-155.029	-155.198	-154.806	-155.734	-154.908	-154.723
96.6	-150.733	-152.123	-148.311	-153.541	-152.585	-153.816	-151.34	-149.862	-152.519	-150.556	-153.008	-154.606	-148.581	-157.904	-160.604	-159.833	-160.138	-160.264			96.6	-151.502	-154.045	-159.37	-157.656	-154.381	-156.518	-157.69	-156.392	-156.646	-157.986	-157.315	-155.875	-158.857	-159.062	-160	-159.278	-159.049	-158.328			96.6	-154.547	-154.796	-155.257	-154.67	-155.927	-154.582	-154.911
96.7	-150.933	-152.503	-148.845	-153.185	-151.51	-153.949	-151.197	-150.96	-153.241	-150.992	-152.847	-154.914	-149.138	-158.087	-159.375	-159.426	-160.507	-160.4			96.7	-152.252	-153.462	-158.404	-158.476	-154.113	-156.587	-157.682	-156.241	-156.917	-158.279	-156.82	-156.347	-158.694	-159.356	-160.261	-158.704	-158.777	-158.087			96.7	-154.18	-154.634	-155.225	-154.13	-155.86	-154.547	-154.338
96.8	-150.851	-153.304	-149.104	-152.597	-150.15	-153.428	-151.707	-151.734	-152.511	-150.828	-152.7	-154.743	-148.839	-158.324	-158.664	-158.931	-161.058	-160.658			96.8	-153.214	-152.941	-158.084	-158.607	-153.732	-156.879	-157.726	-156.897	-157.313	-158	-156.453	-157.518	-158.469	-160.196	-160.333	-158.159	-158.671	-157.496			96.8	-153.098	-154.492	-154.847	-153.751	-155.471	-155.034	-154.104
96.9	-150.146	-153.989	-148.962	-152.24	-148.993	-152.58	-152.513	-151.19	-151.151	-150.501	-152.69	-154.181	-148.539	-158.451	-158.82	-158.757	-161.128	-161.224			96.9	-153.952	-152.685	-158.284	-158.091	-153.977	-157.191	-158.222	-157.768	-157.322	-157.872	-156.749	-158.278	-158.597	-161.048	-160.297	-157.439	-158.93	-157.301			96.9	-151.816	-154.538	-154.366	-153.7	-155.124	-155.892	-154.735
97	-149.747	-154.464	-148.397	-151.821	-148.707	-152.01	-153.177	-150.019	-150.778	-149.894	-152.234	-154.019	-148.829	-158.614	-158.913	-158.904	-160.602	-162			97	-154.016	-152.716	-158.261	-157.369	-154.818	-157.129	-159.139	-157.982	-156.911	-158.103	-156.987	-158.397	-158.753	-161.194	-160.264	-157.005	-158.975	-157.729			97	-151.315	-154.452	-154.207	-153.485	-154.993	-156.414	-155.506
97.1	-150.356	-154.442	-148.04	-151.407	-149.343	-152.45	-153.379	-149.576	-151.728	-149.117	-151.531	-154.563	-149.245	-158.344	-158.837	-159.24	-160.253	-162.685			97.1	-153.52	-152.793	-158.098	-156.574	-155.459	-156.873	-159.978	-157.603	-156.667	-158.242	-156.683	-158.238	-158.765	-160.636	-160.401	-157.241	-158.545	-158.484			97.1	-151.974	-154.014	-154.174	-152.817	-154.83	-156.341	-155.72
97.2	-151.425	-153.691	-148.288	-151.485	-150.061	-153.623	-152.987	-149.65	-153.016	-148.566	-151.122	-155.509	-149.82	-157.392	-159.234	-159.334	-160.709	-162.917			97.2	-153.292	-152.936	-157.9	-156.114	-155.319	-156.839	-160.184	-157	-156.972	-158.116	-156.039	-157.977	-159.247	-159.898	-160.549	-157.713	-158.113	-158.918			97.2	-153.146	-153.645	-154.04	-151.995	-154.28	-156.147	-155.276
97.3	-152.047	-152.515	-148.543	-152.048	-150.544	-154.2	-152.35	-149.599	-153.448	-148.762	-151.034	-156.257	-150.916	-156.687	-159.713	-158.845	-161.447	-162.422			97.3	-153.539	-153.189	-157.512	-156.286	-154.837	-156.951	-159.702	-156.35	-157.445	-158.013	-155.381	-157.697	-160.019	-159.484	-160.405	-158.12	-158.158	-158.689			97.3	-153.849	-153.827	-153.921	-151.589	-153.295	-156.203	-154.401
97.4	-151.741	-151.609	-148.404	-152.785	-151.01	-154.077	-151.858	-149.742	-152.787	-150.115	-151.244	-156.355	-152.092	-156.566	-159.501	-158.148	-161.529	-161.558			97.4	-153.768	-153.192	-156.949	-156.648	-154.819	-156.888	-158.86	-156.116	-157.538	-158.166	-155.112	-157.447	-160.023	-159.477	-160.158	-158.7	-158.644	-158.121			97.4	-153.577	-154.45	-153.85	-151.928	-152.318	-156.35	-153.645
97.5	-150.764	-151.526	-148.484	-153.218	-151.157	-153.966	-151.434	-150.307	-152.054	-151.596	-151.692	-155.797	-153.359	-156.415	-158.846	-157.888	-160.535	-160.898			97.5	-154.071	-153.012	-156.402	-156.625	-155.222	-156.885	-157.916	-156.449	-157.147	-158.567	-155.274	-157.365	-159.037	-159.514	-159.978	-159.287	-159.193	-157.394			97.5	-152.557	-154.944	-153.91	-152.678	-152.243	-156.496	-153.431
97.6	-149.877	-152.098	-149.447	-153.017	-150.576	-153.839	-151.192	-150.742	-152.269	-151.673	-152.019	-155.127	-154.724	-156.315	-158.708	-158.252	-158.987	-160.578			97.6	-154.701	-153.104	-156.471	-156.521	-155.455	-157.37	-157.05	-156.741	-156.65	-158.893	-155.531	-157.911	-157.898	-159.433	-159.819	-159.437	-159.466	-156.534			97.6	-151.455	-155.06	-154.225	-153.268	-153.27	-156.799	-153.717
97.7	-149.711	-152.567	-150.746	-152.881	-149.755	-153.642	-151.629	-150.557	-152.978	-150.744	-151.897	-154.586	-154.807	-156.629	-159.184	-158.514	-158.297	-160.455			97.7	-155.1	-153.325	-157.398	-157.084	-155.327	-158.129	-156.659	-156.573	-156.527	-158.894	-155.84	-158.999	-157.359	-159.258	-159.747	-159.312	-159.745	-156.233			97.7	-150.997	-154.904	-154.572	-153.509	-154.375	-157.033	-154.484
97.8	-150.213	-152.434	-150.988	-153.186	-149.553	-154.038	-152.177	-150.063	-153.379	-150.018	-151.552	-154.106	-153.284	-157.021	-159.251	-158.071	-159.177	-160.557			97.8	-154.751	-153.498	-158.346	-158.087	-155.056	-158.596	-157	-156.204	-156.963	-158.683	-156.156	-159.574	-157.252	-158.83	-159.866	-159.136	-160.195	-156.849			97.8	-151.307	-154.542	-154.504	-153.578	-154.951	-156.887	-155.357
97.9	-151.019	-152.252	-149.813	-153.219	-150.176	-155.464	-151.965	-149.884	-153.534	-149.735	-151.324	-154.18	-152.11	-157.12	-158.514	-157.81	-160.429	-160.902			97.9	-154.157	-153.822	-158.513	-158.647	-154.976	-158.442	-157.419	-156.067	-157.585	-158.388	-156.336	-159.237	-157.317	-158.356	-160.206	-158.744	-160.231	-157.515			97.9	-151.895	-154.177	-154.037	-153.565	-155.154	-156.426	-155.502
98	-151.547	-152.369	-148.359	-152.835	-150.967	-156.811	-151.402	-150.215	-153.376	-149.391	-151.089	-154.953	-152.247	-156.956	-157.571	-158.771	-160.818	-161.183			98	-153.915	-154.283	-158.002	-158.617	-155.103	-157.618	-157.091	-156.492	-157.7	-158.302	-156.714	-158.888	-158.002	-158.402	-160.624	-158.425	-159.662	-157.641			98	-152.448	-154.188	-153.798	-153.386	-154.884	-155.905	-155.014
98.1	-151.195	-152.222	-147.914	-152.293	-151.158	-156.581	-151.251	-150.488	-152.837	-148.841	-150.594	-155.732	-152.302	-156.817	-156.957	-160.113	-160.474	-161.165			98.1	-153.954	-154.531	-157.476	-158.305	-155.011	-156.479	-156.15	-157.236	-157.111	-158.594	-157.396	-158.99	-159.067	-158.957	-160.857	-158.576	-159.093	-157.905			98.1	-152.897	-154.553	-153.982	-153.199	-154.19	-155.524	-154.627
98.2	-150.161	-151.872	-148.603	-151.607	-151.077	-155.105	-151.679	-149.946	-152.565	-148.763	-150.066	-156.256	-151.184	-156.884	-157.07	-160.251	-160.131	-161.03			98.2	-154.019	-154.425	-157.635	-157.856	-154.468	-155.663	-155.352	-157.513	-156.647	-158.835	-157.566	-159.222	-159.322	-159.355	-160.998	-158.817	-158.892	-158.863			98.2	-153.267	-154.978	-154.009	-153.33	-153.843	-155.323	-154.383
98.3	-149.552	-152.148	-149.612	-151.046	-151.244	-153.678	-152.142	-148.806	-152.822	-149.432	-150.398	-156.595	-149.834	-157.017	-157.909	-159.357	-160.168	-161.012			98.3	-154.18	-154.194	-158.423	-157.44	-153.717	-155.453	-155.282	-157.279	-157.018	-158.843	-156.97	-159.358	-158.709	-159.165	-161.135	-158.791	-158.813	-159.808			98.3	-153.684	-155.432	-153.762	-153.818	-154.29	-155.419	-153.925
98.4	-149.844	-153.377	-150.368	-151.007	-151.247	-152.722	-151.909	-148.339	-153.263	-149.939	-151.911	-156.379	-149.858	-157.158	-158.609	-158.667	-160.395	-161.097			98.4	-154.5	-153.891	-158.959	-157.283	-153.065	-155.662	-155.861	-157.048	-157.563	-158.76	-156.28	-159.185	-158.253	-158.828	-160.832	-158.776	-158.624	-159.906			98.4	-153.967	-155.884	-153.835	-154.39	-154.887	-155.941	-153.238
98.5	-150.137	-154.731	-150.73	-151.714	-151.023	-152.21	-151.405	-149.148	-153.488	-149.73	-153.389	-155.557	-151.231	-157.349	-158.416	-158.696	-160.478	-161.198			98.5	-154.653	-153.366	-158.96	-157.451	-152.688	-156.033	-156.423	-156.87	-157.596	-158.463	-155.915	-158.829	-158.274	-158.953	-159.994	-159.051	-158.434	-159.337			98.5	-153.756	-156.033	-154.313	-154.593	-154.873	-156.596	-152.722
98.6	-150.066	-154.915	-150.282	-152.926	-151.023	-152.349	-151.985	-150.407	-152.961	-149.219	-153.929	-154.817	-152.244	-157.401	-157.862	-159.217	-160.491	-161.169			98.6	-154.421	-152.877	-158.84	-157.763	-152.935	-156.368	-156.5	-156.715	-157.411	-158.301	-155.859	-158.884	-158.483	-159.334	-159.205	-159.634	-158.184	-158.706			98.6	-153.323	-155.841	-154.692	-154.352	-154.381	-156.892	-152.919
[truncated: 15,397 more rows]
[truncated: 97 more columns]
