# Supplementary material for: Conserved allosteric inhibition mechanism in SLC1 transporters
Source: eLife. 2023 Mar 1;12:e83464. doi: 10.7554/eLife.83464 (PMC10017108; doi:10.7554/eLife.83464)
Supplement: Figure 5—figure supplement 1—source data 1. [file elife-83464-fig5-figsupp1-data1.xlsx]

## Sheet: Sheet1
Figure S3 original data		MD Simulation-500ns
Figure S3A	MD for ASCT2WT-UCPH														Figure S3B	MD for ASCT2F136Y/I237M-UCPH
exp1 Distance (Å)							exp2 Distance (Å)								exp1 Distance (Å)							exp2 Distance (Å)
Time (ns)	UCPH to F136	UCPH to I237	substrate to S353	RMSD			Time (ns)	UCPH to F136	UCPH to I237	substrate to S353	RMSD				Time (ns)	UCPH to Y136	UCPH to M237	substrate to S353	RMSD			Time (ns)	UCPH to Y136	UCPH to M237	substrate to S353	RMSD
0	3.9641	3.5699	5.68058	0			0	5.46487	5.74843	5.86101	0				0	5.34182	5.36423	5.91559	0			0	5.75608	4.92325	5.94729	0
0.638823	6.81755	4.29045	5.88385	1.34493			0.638823	5.32612	5.32627	6.10382	1.49165				0.635324	6.8522	5.64321	5.71076	1.55265			0.635324	6.50782	5.1046	5.87208	1.49917
1.27765	5.31029	4.00492	5.86252	1.4627			1.27765	6.84653	4.65935	5.94557	1.49353				1.27065	7.4475	6.26569	5.37167	1.42064			1.27065	4.99229	4.09725	5.79094	1.47328
1.91647	5.78572	5.31095	5.22591	1.5285			1.91647	5.08378	5.37742	5.87795	1.53836				1.90597	7.11319	6.62565	5.80183	1.57945			1.90597	4.83723	3.64647	5.66464	1.60988
2.55529	5.64445	4.00253	5.3926	1.51004			2.55529	6.08983	4.60075	5.85475	1.56924				2.5413	6.85067	4.20509	5.91059	1.61606			2.5413	6.61956	4.05973	5.48689	1.49011
3.19411	5.87373	6.65614	5.3205	1.49648			3.19411	7.93475	5.00199	5.57594	1.65422				3.17662	7.40731	4.42841	5.78805	1.5155			3.17662	4.7695	4.33213	5.49516	1.57074
3.83294	5.55164	4.78998	5.2493	1.52287			3.83294	6.90197	4.56996	5.93933	1.62293				3.81194	7.03385	5.39033	5.95327	1.55288			3.81194	4.3042	3.88338	5.61638	1.55043
4.47176	5.10431	3.67026	5.02989	1.56399			4.47176	7.47962	4.22438	5.84104	1.61746				4.44727	7.10156	3.91658	5.75659	1.66388			4.44727	3.86902	4.74796	5.9297	1.65064
5.11058	4.74755	4.44866	5.5874	1.50495			5.11058	7.6194	4.25556	5.23023	1.56563				5.08259	6.87372	4.23491	5.30965	1.58496			5.08259	5.68406	4.75439	5.64973	1.66968
5.7494	5.10226	4.00771	5.68459	1.47232			5.7494	8.78438	4.78083	5.38241	1.54757				5.71792	6.7052	4.34169	5.54366	1.64567			5.71792	6.65682	4.07184	5.63037	1.62405
6.38823	5.68288	4.37349	5.79644	1.61483			6.38823	6.82283	4.85485	5.52873	1.5352				6.35324	6.77495	4.16633	5.41526	1.66806			6.35324	5.08711	4.61182	5.45375	1.73351
7.02705	7.20032	4.222	6.04718	1.55876			7.02705	6.41424	4.35767	5.65433	1.68866				6.98856	6.10852	4.27936	4.95787	1.56064			6.98856	5.05529	4.42409	5.56067	1.64221
7.66587	4.49905	4.02169	5.50077	1.57801			7.66587	5.17654	3.73257	5.69425	1.71249				7.62389	6.03887	3.74771	5.25577	1.6182			7.62389	4.95165	4.22269	5.42012	1.62191
8.30469	4.77431	5.26069	5.93323	1.52875			8.30469	5.53141	3.83301	5.83893	1.64379				8.25921	6.64427	4.50624	5.47712	1.53765			8.25921	6.21965	3.67288	5.26516	1.66243
8.94352	5.76782	4.25191	5.61847	1.48193			8.94352	5.63237	4.95352	5.78907	1.60005				8.89454	6.22619	3.78953	5.3666	1.62466			8.89454	5.49808	4.54279	5.98954	1.72938
9.58234	6.01219	4.62366	5.69103	1.52324			9.58234	4.95493	4.44152	5.81248	1.58133				9.52986	6.83902	3.8796	5.30672	1.60902			9.52986	5.34854	4.05108	5.19705	1.66406
10.2212	5.3996	5.32945	5.62902	1.77344			10.2212	5.55991	3.96125	5.98579	1.75604				10.1652	6.73738	3.99081	5.62887	1.76184			10.1652	5.67218	4.14056	5.81169	1.73887
10.86	5.35596	4.26125	5.93984	1.94922			10.86	6.43354	4.60854	5.67304	2.27903				10.8005	6.59063	5.42143	5.49555	2.53424			10.8005	5.38681	3.77415	5.93926	2.1293
11.4988	5.55002	4.85225	5.88888	2.12871			11.4988	5.00438	4.94517	5.67611	2.32999				11.4358	6.55845	4.81381	5.13258	2.31509			11.4358	5.69886	4.18185	5.40664	2.20264
12.1376	5.38919	4.63187	5.83517	2.39943			12.1376	6.52946	4.57901	6.06091	2.52015				12.0712	6.62267	6.15222	5.5976	2.26003			12.0712	5.11075	3.94359	5.62922	2.13818
12.7765	4.62136	4.72269	5.81364	2.49593			12.7765	5.83517	4.25792	5.92173	2.53574				12.7065	6.44977	5.1087	5.59814	2.39289			12.7065	5.53417	3.8029	5.31104	2.09001
13.4153	4.31281	5.14587	5.82288	2.45358			13.4153	5.16868	3.908	5.70664	2.66641				13.3418	5.93773	5.69251	5.60732	2.37101			13.3418	6.1491	3.70262	5.62005	2.4606
14.0541	4.98084	5.37281	5.76746	3.09527			14.0541	6.99425	4.13948	5.5378	2.65639				13.9771	6.15245	5.3094	5.4201	2.57064			13.9771	5.76633	4.23259	5.29496	2.07642
14.6929	4.91057	5.78607	5.85682	2.95945			14.6929	5.04314	4.304	5.60364	2.75453				14.6125	6.73355	4.79278	5.39744	3.17907			14.6125	5.56921	3.53127	5.40787	2.50341
15.3317	5.49031	4.58335	6.15891	2.81288			15.3317	5.74876	4.85626	5.65855	2.64285				15.2478	6.96248	4.74241	5.20849	2.80201			15.2478	5.42005	4.04703	5.79933	2.35676
15.9706	5.27259	4.05345	5.76013	3.01744			15.9706	5.53687	5.41106	5.70331	2.52281				15.8831	6.85264	5.68301	5.53655	2.61822			15.8831	5.61884	4.59599	5.44176	2.32419
16.6094	5.52526	4.34997	5.78649	2.90395			16.6094	7.26561	4.52308	5.96581	2.95066				16.5184	7.29626	4.76325	5.28648	2.94331			16.5184	5.08062	3.67602	5.56053	2.24349
17.2482	8.06217	5.89712	6.10003	3.10829			17.2482	5.81132	4.52974	5.84269	2.81467				17.1537	6.7389	5.55475	5.66501	2.73453			17.1537	5.74048	4.24519	5.50433	2.45909
17.887	8.59557	4.98818	5.74453	2.85418			17.887	5.92724	4.00653	5.83969	3.20159				17.7891	6.39611	4.16367	5.49346	3.03312			17.7891	5.77196	3.35175	5.30143	2.4933
18.5259	6.43943	5.66207	5.9352	2.99612			18.5259	6.29871	5.11675	5.69351	3.12889				18.4244	6.81733	5.95719	5.08485	2.30016			18.4244	6.0805	3.94437	5.20702	2.5045
19.1647	8.2154	5.59831	5.96709	3.23388			19.1647	4.78225	4.14441	5.94206	3.09179				19.0597	6.51184	4.9795	5.5298	2.43434			19.0597	5.16585	4.39215	5.09732	2.87282
19.8035	7.95801	5.16704	6.00128	2.96988			19.8035	5.39399	5.6589	5.82766	2.80411				19.695	6.50329	4.64844	5.17915	2.61155			19.695	5.71465	4.48046	6.23846	2.86836
20.4423	8.83252	5.55706	6.05994	2.89793			20.4423	5.29832	4.86938	5.78265	2.88269				20.3304	6.80372	4.66912	5.50705	2.62054			20.3304	5.77372	3.89533	5.74843	2.85245
21.0811	7.26696	4.79528	5.64416	2.79075			21.0811	5.58109	5.10461	5.54268	3.04124				20.9657	6.45725	5.05753	6.11407	2.44998			20.9657	5.18544	4.45431	5.45967	2.62266
21.72	9.38468	4.96837	5.60093	2.57972			21.72	5.74198	5.68031	5.28913	2.80853				21.601	6.09323	5.91517	5.47191	2.82861			21.601	5.26855	4.39703	5.2248	2.41704
22.3588	8.33569	5.21536	6.18692	2.78776			22.3588	5.82656	6.57031	5.84214	3.20629				22.2363	6.50953	5.8017	5.65653	2.79338			22.2363	4.82941	4.76315	5.46535	2.48851
22.9976	5.26333	4.74225	5.88616	2.50638			22.9976	5.58957	4.40078	5.615	2.98965				22.8717	6.65696	5.55114	5.73514	2.91604			22.8717	5.10303	4.59084	5.58287	2.69763
23.6364	4.56587	5.08688	5.99174	2.71488			23.6364	4.81386	4.33876	5.53278	3.26159				23.507	6.02004	5.11123	5.80377	2.82297			23.507	5.45698	4.36463	5.60219	2.72979
24.2753	5.02787	5.06328	5.87221	2.69193			24.2753	4.90192	3.61692	5.45938	3.06472				24.1423	6.71272	6.96381	5.53955	3.08645			24.1423	5.28491	3.88368	5.51055	2.74943
24.9141	5.30134	5.08607	6.02043	3.05113			24.9141	4.81724	4.10097	5.80344	2.97281				24.7776	5.45293	5.78616	5.51123	3.27044			24.7776	6.43314	5.13711	5.49535	2.93505
25.5529	4.80525	4.03223	5.81219	2.92711			25.5529	4.53822	3.43187	5.59468	3.071				25.413	6.09754	5.36483	5.67853	3.07101			25.413	5.06857	4.31122	5.62457	2.55268
26.1917	6.41672	4.50152	5.87512	3.02882			26.1917	5.14933	4.8644	5.70797	3.31558				26.0483	5.35616	4.58362	5.41141	2.83809			26.0483	5.14823	4.46405	5.4606	2.57926
26.8305	5.37674	3.92724	5.84565	3.21905			26.8305	5.39276	5.29774	5.87602	3.02544				26.6836	5.77353	5.46112	5.78534	3.11262			26.6836	5.49767	4.31811	5.49937	2.66425
27.4694	5.78766	4.50655	5.76658	2.94058			27.4694	4.99993	4.59876	5.82777	3.03236				27.3189	5.97701	4.78104	5.72881	3.03164			27.3189	5.31079	4.12011	6.11756	2.96638
28.1082	5.94605	3.89826	5.72016	2.96878			28.1082	5.78744	4.37477	5.4717	3.53679				27.9543	6.42753	4.62385	5.28314	3.07937			27.9543	5.62555	3.79996	6.42746	2.46898
28.747	5.67333	4.039	5.82766	3.2953			28.747	5.03988	5.17301	5.5486	3.50163				28.5896	5.99329	5.73401	5.85502	3.25781			28.5896	5.2808	4.43614	6.07383	2.72578
29.3858	5.09675	5.3423	5.6329	3.42471			29.3858	5.73202	4.99618	5.70712	4.03495				29.2249	7.11895	5.33885	5.50717	3.15883			29.2249	5.79132	4.02473	5.89514	2.7619
30.0247	4.8932	4.98852	5.8995	3.34428			30.0247	4.83576	4.78409	5.73859	4.22197				29.8602	6.4063	5.89849	5.76879	3.02338			29.8602	5.3963	3.87554	5.78046	2.91115
30.6635	5.21927	5.32108	5.61568	3.39162			30.6635	5.36228	4.92039	5.6758	4.29029				30.4956	7.10336	6.11014	5.66394	3.01493			30.4956	5.52468	3.57748	5.82427	2.8144
31.3023	5.19501	4.24261	5.88162	3.48745			31.3023	5.1147	4.99522	5.60378	4.10249				31.1309	6.33088	6.09989	5.6155	2.82545			31.1309	5.37206	4.54913	5.57372	2.90139
31.9411	4.84112	3.94413	6.0435	3.43583			31.9411	5.37413	4.31492	5.65188	3.66913				31.7662	5.55046	5.65808	5.32048	3.17392			31.7662	5.58953	3.562	6.08455	2.76695
32.5799	5.26387	4.74351	5.81254	3.54846			32.5799	5.84408	4.80894	5.73543	4.08615				32.4015	6.67728	4.72416	5.85518	3.09591			32.4015	5.44969	3.92368	5.72574	3.08815
33.2188	4.73513	4.75856	5.84475	3.62225			33.2188	4.64194	4.52074	5.79012	4.31792				33.0368	6.22928	4.29427	5.62214	3.50928			33.0368	5.93387	4.18112	5.78087	2.87411
33.8576	4.96746	4.63649	5.82112	3.55229			33.8576	4.81459	4.68708	5.67972	3.82411				33.6722	6.54626	4.94916	6.41748	3.11627			33.6722	5.85544	3.964	5.52126	2.80401
34.4964	4.44753	4.63353	5.91724	3.71467			34.4964	6.38154	5.05504	5.67791	3.75265				34.3075	6.14855	5.90535	5.73747	3.15233			34.3075	5.45386	4.085	5.19732	2.61775
35.1352	4.88291	4.48522	5.88983	3.77349			35.1352	4.87	5.2137	5.535	4.04983				34.9428	6.87427	5.51593	6.00125	3.26493			34.9428	5.36445	3.30124	5.40178	2.68572
35.7741	4.45865	4.72635	5.81616	3.54848			35.7741	5.23255	4.76761	5.65987	4.2769				35.5781	6.09255	4.81407	5.29236	3.34619			35.5781	5.40562	3.72077	5.36944	2.80078
36.4129	4.85328	3.77773	5.9781	3.87256			36.4129	4.46488	5.06233	5.60789	4.09437				36.2135	6.86306	5.37513	5.93916	3.42276			36.2135	5.457	3.93293	5.83742	2.67021
37.0517	5.21893	5.11519	5.82127	3.79764			37.0517	5.88984	4.34787	5.6503	4.19359				36.8488	7.05342	5.11753	5.54899	3.09221			36.8488	5.49696	3.18694	5.2867	2.84354
37.6905	5.4179	4.42858	6.2108	3.89048			37.6905	5.96878	4.82358	5.45277	4.44275				37.4841	6.95606	6.37382	5.57436	3.20594			37.4841	5.52086	4.84936	5.55692	2.90054
38.3294	5.57221	4.43933	5.8045	3.96804			38.3294	5.27735	4.81492	5.67197	4.10579				38.1194	6.79589	5.97289	5.49961	3.1834			38.1194	5.5677	3.83866	5.20381	2.41046
38.9682	5.20459	4.54858	5.93996	3.96993			38.9682	5.48756	4.41813	5.52301	4.10667				38.7548	6.32358	4.90073	5.77647	3.24043			38.7548	5.58193	4.20375	5.04191	2.7682
39.607	5.04516	4.68032	5.74893	4.00184			39.607	4.37704	4.71338	5.63415	4.21887				39.3901	6.79486	4.95237	5.24806	3.24866			39.3901	5.28974	4.21937	5.35553	2.86385
40.2458	4.9428	4.11712	5.93061	3.88075			40.2458	5.5174	4.57737	5.58551	4.12477				40.0254	6.7701	5.9802	7.35395	3.05838			40.0254	6.30709	4.50388	6.06768	2.85545
40.8846	5.97905	4.41326	6.06719	4.04919			40.8846	4.7645	4.09192	5.75734	3.7102				40.6607	7.05559	6.51605	5.89943	2.96307			40.6607	5.77549	4.84828	6.01827	2.82334
41.5235	4.66715	5.18238	6.05981	4.16539			41.5235	4.69327	5.06796	5.4566	4.12142				41.2961	7.32587	5.3048	6.14526	3.55393			41.2961	5.11764	4.46357	5.63092	2.86784
42.1623	4.8294	4.61971	5.71021	3.88327			42.1623	5.02642	4.66322	5.76698	3.97019				41.9314	7.54957	6.33549	6.41157	3.35323			41.9314	5.51183	3.89582	5.63487	3.16431
42.8011	4.64772	4.38569	5.95251	3.85173			42.8011	5.07098	5.07496	5.77768	4.15316				42.5667	7.09746	6.23888	6.01981	3.3138			42.5667	5.2713	4.78536	5.87876	2.96111
43.4399	5.19269	4.93567	5.96572	3.62956			43.4399	5.01184	4.44344	5.54728	4.16202				43.202	6.40932	5.95778	5.87964	3.29097			43.202	5.63039	3.73558	5.57526	3.25601
44.0788	4.80473	4.04716	6.18281	3.243			44.0788	5.37441	4.06851	5.56136	3.77301				43.8374	7.4238	6.63773	5.78854	3.21062			43.8374	5.56152	4.98038	5.49742	3.14552
44.7176	5.13547	4.49955	5.94893	3.89892			44.7176	5.37697	4.45154	5.8086	3.89058				44.4727	6.96411	5.85261	5.91591	3.23292			44.4727	5.27556	4.71093	5.86194	3.19724
45.3564	4.89282	5.62347	5.96091	3.79573			45.3564	4.93145	6.20437	5.60156	3.93872				45.108	6.95033	5.59119	6.19699	3.34301			45.108	5.44689	4.06088	6.14309	3.47236
45.9952	5.2596	4.3217	6.06607	3.54346			45.9952	6.05842	7.4723	5.5668	3.96716				45.7433	7.5936	5.69883	5.75013	3.38985			45.7433	6.36532	4.66358	5.96299	3.25378
46.634	5.22222	4.30521	5.93416	3.48146			46.634	5.50499	5.54092	5.43958	3.91598				46.3787	7.42979	6.74217	5.8981	3.34886			46.3787	5.71337	4.49062	5.95465	3.50748
47.2729	4.62827	3.46141	5.72436	3.43524			47.2729	5.50805	4.59718	5.52509	3.71475				47.014	6.86378	4.87341	5.83744	3.36096			47.014	5.55398	3.86522	5.74212	3.38022
47.9117	4.85462	4.62519	6.03054	3.43579			47.9117	5.57331	6.16403	5.74831	3.61146				47.6493	6.21542	3.95765	5.732	3.47799			47.6493	5.43041	4.18045	6.15252	3.26692
48.5505	4.9672	3.58387	5.80847	3.08557			48.5505	6.22035	4.83298	5.52325	4.1029				48.2846	6.73543	4.59768	5.93212	3.17398			48.2846	5.69154	3.55131	5.97012	3.77435
49.1893	5.66823	4.32853	5.95746	3.2992			49.1893	5.77664	5.90886	5.73767	3.88852				48.9199	7.9984	4.74677	5.99699	3.1271			48.9199	5.42253	4.97046	5.97794	3.89993
49.8282	5.19097	4.74865	5.98984	2.98154			49.8282	5.15321	6.36222	5.66963	4.26227				49.5553	7.24722	4.35079	5.84203	3.40925			49.5553	6.11991	3.94955	6.12487	3.78925
50.467	5.07153	4.7904	5.79949	2.95617			50.467	6.39547	6.34497	5.73768	4.14552				50.1906	7.13547	4.53198	5.86783	3.26967			50.1906	6.53475	3.84967	5.92276	3.73601
51.1058	5.73362	4.39101	5.75096	3.11839			51.1058	5.72681	5.399	5.61419	4.26489				50.8259	7.22243	3.85004	5.60484	3.43586			50.8259	5.61547	4.52875	5.93701	3.6466
51.7446	5.31821	4.13483	5.92084	3.16269			51.7446	5.39007	6.51171	5.24984	4.47222				51.4612	6.94349	4.78291	5.71418	3.61489			51.4612	5.39297	4.58455	6.08451	3.63613
52.3834	5.50249	5.48495	5.8768	3.35711			52.3834	5.60239	6.16854	5.75396	4.48293				52.0966	8.06833	3.60774	5.79349	3.42319			52.0966	5.56002	4.21022	7.94587	3.77765
53.0223	5.88164	5.17107	5.93189	3.39721			53.0223	5.17516	5.67582	5.29358	4.29323				52.7319	7.49195	3.90973	5.98034	3.27323			52.7319	5.74165	3.97428	6.15273	4.04545
53.6611	4.86438	5.06805	5.8436	3.50028			53.6611	5.40947	6.7852	5.46478	4.52624				53.3672	7.18092	3.8067	6.11711	3.12358			53.3672	5.44352	4.90315	6.07156	3.99189
54.2999	5.10264	5.08149	5.91136	3.58129			54.2999	4.74562	5.71173	5.88574	3.97746				54.0025	7.23826	4.04406	5.70679	3.44749			54.0025	5.12073	4.17	8.29398	3.78562
54.9387	5.07322	4.23624	5.94527	3.42279			54.9387	5.40114	3.74781	5.74605	4.33458				54.6379	7.44684	5.23595	6.07815	3.2247			54.6379	6.34973	4.09643	5.92022	3.79759
55.5776	5.30215	3.98501	5.87338	3.2797			55.5776	5.60835	4.77839	5.4539	4.10615				55.2732	7.23087	4.44616	6.04343	3.09234			55.2732	5.95337	3.89441	6.26666	3.65777
56.2164	5.05672	4.45157	6.05606	3.17373			56.2164	4.79531	4.54454	5.5053	4.18193				55.9085	7.14968	4.04864	5.96513	3.30886			55.9085	5.28269	4.39583	6.18157	3.64286
56.8552	5.43137	5.04735	5.78023	3.18152			56.8552	4.66349	5.19882	5.68342	4.44771				56.5438	7.62616	4.39526	5.90948	3.09878			56.5438	6.0252	3.92649	5.84234	3.58769
57.494	5.15958	4.82183	5.92659	3.10645			57.494	4.27773	4.69372	5.52668	4.3064				57.1792	7.36963	4.77522	6.15265	3.20396			57.1792	5.45387	3.62451	6.03831	3.5446
58.1328	5.17108	4.72416	6.02744	3.23942			58.1328	5.11762	4.21542	5.70388	3.99477				57.8145	6.63736	4.53394	6.07178	3.01556			57.8145	5.17853	5.13771	6.21865	3.50547
58.7717	5.34585	3.87109	6.10765	3.27062			58.7717	4.88017	5.2972	5.45614	4.40529				58.4498	6.9466	4.07818	5.81551	3.23358			58.4498	5.71743	4.26201	6.2523	3.61239
59.4105	4.87108	4.40151	5.83935	3.38128			59.4105	4.7282	4.47489	5.70456	4.71936				59.0851	6.92112	4.18726	5.76309	3.34606			59.0851	5.49502	4.0276	5.79395	3.55318
60.0493	5.55466	4.97647	5.97523	3.23268			60.0493	4.93757	4.2535	5.64871	4.91821				59.7205	7.42978	4.14149	5.9303	3.29648			59.7205	4.83125	4.40781	6.04679	3.45722
60.6881	4.97712	4.54477	5.79912	3.15465			60.6881	5.12161	4.07847	5.6138	4.75422				60.3558	7.55781	4.38417	5.63643	3.31515			60.3558	5.54504	3.87458	6.0746	3.84689
61.327	5.14262	5.46369	6.07204	3.37028			61.327	4.60748	4.80994	5.63338	4.55263				60.9911	7.38207	4.82848	5.92032	3.23433			60.9911	5.571	4.60215	6.02925	3.78467
61.9658	4.72027	4.88683	5.78049	3.63105			61.9658	4.41867	5.09467	5.64989	4.73147				61.6264	6.92418	4.26788	5.7426	3.39987			61.6264	5.47804	5.03879	5.95909	3.71319
62.6046	5.06881	5.02845	5.95536	3.26305			62.6046	4.59158	4.9986	5.55591	4.9093				62.2618	7.1565	4.32348	5.70608	3.45016			62.2618	5.39022	3.95693	6.05877	3.5515
63.2434	5.49644	4.364	5.95644	3.62308			63.2434	4.83585	4.44894	5.91839	4.55474				62.8971	6.74386	3.78327	5.76521	3.44306			62.8971	5.64382	4.59028	6.16227	3.85338
63.8823	5.18488	4.08525	5.71534	3.44107			63.8823	5.10923	5.11713	5.96362	4.56315				63.5324	7.645	4.13503	6.03441	3.46919			63.5324	5.69764	4.43276	6.1339	3.54358
64.5211	4.57025	5.4781	5.70482	3.45916			64.5211	4.19373	5.07677	5.34301	4.67978				64.1677	7.44739	3.86811	6.02092	3.36742			64.1677	5.95271	4.71726	5.8481	3.25705
65.1599	4.00924	4.57698	5.88015	3.7648			65.1599	4.93095	5.48246	5.4644	4.27341				64.803	6.43819	3.84376	5.91692	3.46119			64.803	5.41794	3.82172	6.09928	3.38107
65.7987	4.86361	4.62433	6.13807	3.68784			65.7987	4.71345	4.57008	5.52375	4.73347				65.4384	6.789	4.01178	5.68719	3.15572			65.4384	5.23358	4.26419	5.96112	3.12728
66.4375	4.88961	4.74077	5.91626	3.40845			66.4375	4.65801	4.66855	5.79581	4.44147				66.0737	7.58783	3.79906	5.58406	3.46873			66.0737	5.52055	3.59084	6.46611	3.46056
67.0764	4.9486	4.72968	6.03969	3.41994			67.0764	4.68192	6.41927	5.70482	4.25884				66.709	6.13814	4.11097	5.66913	3.41765			66.709	5.50814	3.84325	6.06583	3.30274
67.7152	4.76959	5.2084	6.08178	3.47262			67.7152	4.62688	6.60181	5.59595	4.67464				67.3443	6.80931	3.94452	6.02012	3.53623			67.3443	5.33012	4.99392	6.00827	3.49875
68.354	5.22902	4.04248	5.79905	3.3854			68.354	5.24501	6.74409	5.39189	4.70607				67.9797	6.64707	4.2775	5.68918	3.44259			67.9797	5.04206	5.38883	5.96286	3.50352
68.9928	5.18046	5.05113	5.9964	3.30689			68.9928	4.82142	6.63155	5.8117	4.75535				68.615	6.88464	4.1533	7.35956	3.51151			68.615	5.69068	4.53517	5.99008	3.4254
69.6317	4.62622	4.89964	5.8845	3.3412			69.6317	4.49423	5.6132	5.7796	4.9213				69.2503	7.11338	3.6469	5.76435	3.11661			69.2503	5.75281	4.42192	5.83441	3.43189
70.2705	5.66772	4.12104	6.02301	3.39133			70.2705	5.33165	6.05287	5.73798	4.63218				69.8856	6.6663	3.77865	7.18792	3.18314			69.8856	6.16625	4.12824	8.59112	3.55217
70.9093	6.25023	4.67346	5.87076	3.39703			70.9093	5.08621	5.23068	5.76243	4.97865				70.521	6.69114	4.21283	5.99761	3.37977			70.521	4.86867	4.15693	10.3387	3.32933
71.5481	4.96074	5.06451	5.95206	3.4693			71.5481	5.1254	6.34254	5.39071	4.60055				71.1563	6.3523	4.23955	5.80179	3.3602			71.1563	5.02113	4.57779	9.60798	3.28373
72.1869	5.4697	5.40939	5.88319	3.41271			72.1869	5.76856	6.77462	5.68279	4.62883				71.7916	6.69925	3.91503	6.00555	3.48786			71.7916	5.64893	3.98696	10.2306	3.44931
72.8258	4.39511	3.94516	6.03536	3.56128			72.8258	5.92124	6.03092	5.70941	4.15807				72.4269	6.71746	4.77024	7.30575	3.78127			72.4269	6.95959	3.66285	8.19286	3.38398
73.4646	5.54498	4.3878	5.99755	3.50901			73.4646	4.56406	5.78036	5.6387	4.06396				73.0623	7.66931	4.6502	5.7765	3.70306			73.0623	6.46348	3.86769	10.7195	3.50501
74.1034	5.49847	5.0494	5.68792	3.41968			74.1034	5.19527	5.11618	5.82089	4.43739				73.6976	6.62775	4.10689	5.79014	3.87711			73.6976	5.7208	3.7955	9.71637	3.55205
74.7422	5.87505	4.33487	6.08164	3.60214			74.7422	5.33646	5.28482	5.93891	4.42022				74.3329	6.44022	4.33436	5.55958	3.63896			74.3329	5.03778	3.7787	7.36437	3.58688
75.3811	5.47088	4.43566	6.01883	3.31187			75.3811	4.40224	5.75295	5.7996	4.00081				74.9682	6.45681	4.31969	5.91244	3.56528			74.9682	5.34674	3.72451	6.09513	3.55502
76.0199	5.19939	4.71154	5.84324	3.56815			76.0199	4.83385	5.90337	5.73847	4.19288				75.6036	5.99385	3.77914	6.92892	3.66013			75.6036	5.72131	4.09898	6.22537	3.87823
76.6587	5.04841	5.34047	5.96353	3.57722			76.6587	4.83932	5.42645	5.86769	4.43969				76.2389	7.44641	3.83604	5.90499	3.53216			76.2389	5.36123	4.85897	6.22541	3.65041
77.2975	5.39509	4.46552	5.77448	3.22485			77.2975	4.34358	4.44829	5.67909	4.54873				76.8742	6.76359	4.46283	5.82555	3.6451			76.8742	6.11001	4.04679	6.2907	3.8879
77.9363	4.5589	4.60269	5.86409	3.54789			77.9363	4.99115	4.76215	5.7635	4.34739				77.5095	6.49408	5.11327	6.11612	3.62698			77.5095	5.98574	3.67363	7.81057	3.71952
78.5752	5.06433	5.04034	5.59912	3.24935			78.5752	4.27009	4.24528	5.67188	4.3004				78.1449	6.38	4.03912	6.05344	3.78864			78.1449	6.238	4.22609	8.16032	3.79421
79.214	4.6713	4.25781	5.96075	3.11908			79.214	5.45141	4.90178	5.51194	4.24906				78.7802	6.16751	4.28094	5.87085	3.61683			78.7802	5.23537	4.43013	7.21165	3.68115
79.8528	5.57431	4.08993	6.00285	3.38306			79.8528	5.14001	4.48817	5.68565	4.56909				79.4155	6.36117	4.75943	7.72559	3.49664			79.4155	5.45159	4.18593	8.07231	3.6488
80.4916	4.44495	4.65548	5.95758	3.10491			80.4916	4.80117	4.73599	5.94134	4.7185				80.0508	6.2119	4.02843	6.03944	3.28444			80.0508	5.39436	4.56704	6.27742	3.60847
81.1305	4.14142	4.4407	6.01799	3.07152			81.1305	4.94874	4.22557	5.56642	4.74643				80.6861	6.81514	3.71709	5.87839	3.41419			80.6861	5.31856	5.42425	6.15311	3.75774
81.7693	4.81842	5.19974	5.9363	3.04685			81.7693	5.0199	4.56669	5.27349	4.85642				81.3215	7.33798	4.45654	5.95602	3.45688			81.3215	5.10474	3.5434	5.99932	3.56541
82.4081	5.16688	5.06143	5.84837	3.25064			82.4081	5.58225	5.0443	5.75773	4.54574				81.9568	7.24723	4.29844	6.0072	3.49705			81.9568	5.47704	3.82463	7.90428	3.80636
83.0469	5.36365	3.96135	5.9117	2.82523			83.0469	5.08515	4.82546	5.89462	4.41233				82.5921	6.65259	5.10556	5.66568	3.72668			82.5921	5.11095	4.09692	6.10084	3.60526
83.6858	4.9196	4.12011	6.00336	2.81556			83.6858	4.91203	5.39652	6.06184	4.13515				83.2274	5.93382	4.46114	5.59516	3.78299			83.2274	5.02012	3.9915	6.01006	3.47353
84.3246	5.00719	5.51232	5.86153	2.91971			84.3246	5.02412	4.97094	5.79677	4.55075				83.8628	5.69351	5.10803	5.82844	3.84901			83.8628	5.29071	3.76703	5.37195	3.79246
84.9634	4.32631	5.26852	5.55912	2.98008			84.9634	4.83597	5.15084	6.40699	4.43574				84.4981	6.79701	5.08763	5.7704	3.65774			84.4981	5.07905	4.13333	5.36778	3.71799
85.6022	5.41351	5.29811	5.77264	2.79414			85.6022	4.0393	4.60829	6.12424	4.43647				85.1334	7.33646	4.83202	6.20997	3.90157			85.1334	5.16328	3.91705	5.80116	3.94634
86.241	5.14084	4.44877	5.98655	2.98444			86.241	4.06381	4.95492	6.06653	4.48352				85.7687	6.63441	4.37126	5.82411	3.76098			85.7687	5.60518	4.79461	5.61128	3.81818
86.8799	5.05	4.98749	5.80372	2.83617			86.8799	5.18318	4.67251	5.9178	4.86999				86.4041	6.41051	4.85137	6.1575	3.86904			86.4041	5.43195	4.28803	5.61152	3.94697
87.5187	4.97569	5.02338	5.89331	2.85836			87.5187	4.09302	4.65283	6.46772	4.79236				87.0394	6.89945	4.64327	5.75379	3.9006			87.0394	4.91895	4.57366	5.60637	4.11948
88.1575	4.66917	4.94506	5.87643	2.81372			88.1575	4.58977	4.8285	6.15646	5.14441				87.6747	7.5008	4.34424	5.97095	3.67768			87.6747	5.37705	4.3373	5.99596	3.7601
88.7963	5.07798	5.50706	5.68267	2.88762			88.7963	5.42099	4.37606	6.01846	4.8481				88.31	6.53721	4.6295	5.98153	3.4738			88.31	5.49974	4.8118	5.48834	3.80907
89.4352	4.34468	3.59835	5.96951	2.85286			89.4352	3.81848	4.57114	6.36669	4.88454				88.9454	6.00684	4.29935	5.89831	3.78741			88.9454	5.0778	3.96229	5.5037	3.77849
90.074	4.38043	5.15243	5.76507	3.15617			90.074	3.82023	4.44254	5.99781	4.66003				89.5807	6.50163	3.6736	6.18028	3.70475			89.5807	5.29308	3.32682	5.58964	3.78525
90.7128	4.63055	6.21369	5.93251	3.17326			90.7128	4.57334	3.96968	6.8124	4.6124				90.216	5.46687	4.41266	6.11103	3.94222			90.216	4.92788	3.68472	5.33402	3.69438
91.3516	4.98585	4.71945	5.77576	2.95895			91.3516	3.62675	4.40571	5.77346	4.48555				90.8513	6.85693	4.17019	6.00066	3.6653			90.8513	5.35571	3.80222	5.62267	3.45346
91.9904	5.0447	5.61998	5.89828	3.09304			91.9904	4.57569	5.19741	6.04872	4.87684				91.4867	5.70612	4.02456	6.04883	3.57111			91.4867	5.13651	3.90096	5.41015	3.47338
92.6293	4.60627	4.94817	5.83615	3.41722			92.6293	4.3682	4.58911	6.40339	5.04404				92.122	6.38612	3.71106	7.65426	3.69144			92.122	5.70684	3.65476	5.77041	3.54927
93.2681	4.83398	5.54266	5.81275	3.39984			93.2681	4.94131	4.83384	8.19135	4.81632				92.7573	7.27768	5.32706	7.09896	3.6642			92.7573	4.8879	4.57277	5.3807	3.75389
93.9069	4.98343	4.76323	5.66136	3.34779			93.9069	4.97096	4.3656	5.80446	4.49813				93.3926	6.37216	6.61686	5.95975	3.63869			93.3926	5.87424	4.76914	5.7491	3.62604
94.5457	4.33707	5.27396	6.00484	3.43048			94.5457	4.84564	4.23863	5.48404	4.81459				94.028	7.01426	6.48861	5.74863	3.59276			94.028	5.41001	4.37655	5.59602	3.62844
95.1846	5.11815	4.49656	5.86996	3.44664			95.1846	4.27944	4.84497	6.0117	4.88472				94.6633	6.85535	6.67829	5.71342	3.7896			94.6633	4.98825	3.93052	5.86564	3.97189
95.8234	4.88242	4.99648	5.93638	3.64789			95.8234	5.06503	3.97704	6.34331	4.7731				95.2986	6.69218	5.93055	5.84673	3.77684			95.2986	4.75874	4.46683	5.78928	3.85385
96.4622	4.87699	4.94674	5.84507	3.49689			96.4622	4.51915	5.17748	6.38878	4.61204				95.9339	6.64792	6.5829	5.94887	3.92298			95.9339	5.14399	4.65278	5.4911	3.68844
97.101	4.3381	4.90879	5.93892	3.31847			97.101	4.11501	3.84158	5.98651	4.98804				96.5693	6.38117	5.31891	6.02175	3.9504			96.5693	4.48897	4.09192	5.54413	3.71041
97.7398	4.25029	4.65838	5.97318	3.28856			97.7398	4.42932	4.4577	5.96106	4.92565				97.2046	6.9524	4.92412	5.76187	4.05075			97.2046	4.94477	4.2446	5.52351	3.8258
98.3787	5.48902	4.09385	6.0752	3.33768			98.3787	4.66911	4.82941	6.08772	5.10641				97.8399	6.43686	5.23556	6.03965	3.66798			97.8399	5.31962	5.29082	6.03579	3.61691
99.0175	5.15116	5.54562	6.00092	3.21315			99.0175	5.14945	4.6486	6.15719	5.10423				98.4752	6.63419	6.59157	5.68882	3.88373			98.4752	5.18308	4.54384	5.68849	3.80542
99.6563	5.38714	5.20198	5.89863	3.18572			99.6563	4.39085	5.01778	5.64632	4.89115				99.1105	6.78946	5.97801	5.62832	3.86767			99.1105	5.61899	5.07506	5.62338	3.58284
100.295	4.96575	5.4754	5.77515	3.2147			100.295	4.81744	4.55573	7.55008	5.1364				99.7459	7.45424	6.7766	5.94309	3.5126			99.7459	4.9448	3.97968	5.58989	3.54654
100.934	4.84348	4.54979	5.78522	3.12822			100.934	4.88219	4.35028	5.87361	5.03038				100.381	6.58639	6.96072	6.31499	3.98651			100.381	5.09033	3.8389	5.52201	3.5968
101.573	5.11623	5.6951	5.81544	3.15316			101.573	5.08463	4.71815	6.02572	4.78392				101.017	7.29709	6.9505	5.977	3.56179			101.017	4.83453	4.20182	5.94543	3.47308
102.212	4.86026	4.9311	5.76235	3.02325			102.212	5.44628	5.07409	5.74379	4.75996				101.652	7.08131	7.20785	7.45248	3.83835			101.652	5.3139	4.49651	5.33591	3.52493
102.85	4.55638	5.61672	5.84834	3.02198			102.85	4.93057	3.86545	6.4725	4.90948				102.287	7.10561	6.75063	6.99627	3.87571			102.287	5.24569	4.71115	5.74153	3.72086
103.489	4.20279	4.79245	6.00089	2.70477			103.489	5.24777	4.44483	5.93447	4.98114				102.922	6.84635	6.30227	7.37516	3.66936			102.922	5.83138	4.63513	5.88307	3.56503
104.128	5.07756	5.39182	5.83437	3.24149			104.128	5.30762	4.54568	5.8772	4.90136				103.558	6.74577	5.92926	6.10361	4.16864			103.558	5.63433	4.55281	5.49676	3.67871
104.767	5.64052	4.47085	5.87815	3.2904			104.767	4.90585	4.81408	6.16993	4.70267				104.193	7.49475	6.75826	7.56889	3.89799			104.193	5.72092	4.25487	5.51587	3.94825
105.406	5.25204	4.00039	6.03087	3.00296			105.406	4.81497	4.87822	6.68662	5.09824				104.828	7.29014	6.90308	5.98687	3.85762			104.828	5.01826	4.74332	5.5549	3.84034
106.045	4.97827	5.4456	6.11899	3.14539			106.045	4.18516	5.01611	6.13286	5.33735				105.464	7.27259	6.41127	6.05815	3.79366			105.464	5.28257	4.33495	5.02599	3.67834
106.683	4.99601	4.78544	5.77513	3.1231			106.683	4.70866	4.64057	5.70026	5.23593				106.099	6.81048	6.1935	5.15436	3.84771			106.099	5.26653	4.45918	5.02189	3.9299
107.322	5.70677	5.7496	5.62293	2.98872			107.322	4.54144	5.18948	5.75274	4.95999				106.734	7.27487	6.585	5.42861	4.02705			106.734	5.31511	4.10993	5.33585	3.98926
107.961	5.45174	5.75441	5.79354	3.20518			107.961	5.8271	4.45903	6.51379	5.0365				107.37	6.83919	5.75844	7.15093	3.81683			107.37	5.03762	4.6357	5.41985	3.71168
108.6	5.07594	6.97914	6.16008	3.26447			108.6	5.20396	4.37842	7.4278	5.02268				108.005	6.50401	5.46069	5.59586	3.84153			108.005	4.92029	4.05543	5.29121	3.66391
109.239	4.97108	6.28164	5.86954	3.38635			109.239	4.97681	4.86199	7.76705	5.10055				108.64	6.86919	4.90074	6.09659	3.67264			108.64	5.33462	4.56408	5.44828	3.67278
109.877	4.85528	4.77032	5.82649	2.909			109.877	4.48938	5.24195	7.71397	5.22342				109.276	6.46302	6.40108	6.00375	3.83314			109.276	4.91645	4.69486	5.46326	3.87275
110.516	6.3365	6.26431	6.05511	3.20032			110.516	5.12082	5.50085	7.65797	5.2695				109.911	6.7625	6.58969	6.83533	3.81417			109.911	6.00287	4.5592	5.50733	3.6981
111.155	5.14408	4.94775	5.71623	3.03337			111.155	4.26454	4.43731	9.29151	5.46979				110.546	6.46914	6.12064	6.27914	3.82124			110.546	6.30011	3.76552	5.0012	3.67589
111.794	4.89212	5.86417	5.80964	3.12878			111.794	4.56302	4.26306	6.41142	5.53841				111.182	7.88232	6.8768	5.9022	3.64822			111.182	5.0098	4.59547	5.51303	3.80397
112.433	5.11794	4.73869	6.03495	3.01782			112.433	5.11364	4.90183	5.79071	5.22767				111.817	6.85661	6.96908	8.00307	3.58292			111.817	4.70839	4.47567	5.47131	3.56625
113.072	4.8218	5.83247	6.01979	3.06849			113.072	4.63749	4.31357	5.76709	5.1255				112.452	6.57059	5.89447	6.00198	3.56643			112.452	4.72053	3.97061	5.36853	3.86626
113.71	5.10662	5.51154	5.88911	3.23147			113.71	3.71942	4.49502	5.78793	5.21209				113.088	7.1785	5.41471	6.50369	3.57856			113.088	5.62338	4.2516	5.15572	3.50862
114.349	4.61311	5.163	6.0523	3.5983			114.349	5.21859	4.9442	5.67473	5.2405				113.723	7.13042	5.91243	6.29587	3.70254			113.723	4.38962	5.13842	5.77453	3.56956
114.988	4.61771	4.71914	5.99804	3.39532			114.988	3.87454	5.38473	6.69001	5.54062				114.358	6.71986	5.33461	5.82772	3.52638			114.358	4.6933	4.34451	5.84525	3.81897
115.627	4.68142	5.6827	5.51456	3.47008			115.627	4.27482	4.19367	6.73055	5.3224				114.994	7.50336	6.45188	5.8853	3.7585			114.994	5.39077	4.44857	5.64666	3.56569
116.266	4.88329	5.2067	5.70913	3.16494			116.266	4.83099	4.86092	6.5961	5.35783				115.629	6.96165	5.58056	6.29456	3.67676			115.629	4.93946	4.64028	6.05663	3.90902
116.905	5.73504	5.42872	5.81371	3.18931			116.905	4.95649	4.5291	6.31013	5.32925				116.264	6.12361	6.46973	6.17897	3.63942			116.264	5.53385	3.52315	5.87169	3.74085
117.543	6.2121	6.73441	5.95272	3.17796			117.543	4.89078	4.32007	6.02735	5.04279				116.9	7.17003	5.71819	7.90072	3.63607			116.9	5.10619	3.80778	5.77326	3.58509
118.182	5.12115	5.98253	5.83676	3.2844			118.182	4.52426	4.64413	6.22851	5.19931				117.535	6.38332	5.30227	6.24886	3.7825			117.535	5.26762	3.66331	5.64968	3.72582
118.821	5.00451	4.47967	5.87031	3.24709			118.821	4.72386	4.78187	5.81512	5.05367				118.17	5.24122	5.47735	6.95312	3.77427			118.17	5.65463	4.13262	8.43711	3.76241
119.46	4.88717	3.78697	5.75898	3.09813			119.46	3.46971	4.34087	5.52331	5.08188				118.806	6.89284	5.1441	6.09387	3.96251			118.806	5.44417	4.60016	5.87753	3.7224
120.099	4.66765	3.70699	5.92475	3.45909			120.099	5.05733	4.2375	5.59639	5.08429				119.441	6.95154	5.69892	6.35618	3.7601			119.441	5.34922	4.40453	5.83342	3.64478
120.737	4.55549	3.94312	5.75165	3.17959			120.737	5.56886	3.65626	5.57284	4.95845				120.076	6.07597	4.64964	6.1499	3.90313			120.076	5.04303	3.92354	5.30603	3.59504
121.376	4.54211	3.88904	5.97759	3.1603			121.376	5.1084	4.74345	5.21349	4.88507				120.712	6.2561	5.29821	7.21086	3.78861			120.712	4.39215	5.0484	5.64481	3.79067
122.015	5.27122	5.54509	5.81384	3.4894			122.015	4.94604	3.97167	5.53565	5.16692				121.347	6.28701	4.71971	6.5098	3.78717			121.347	5.15519	3.75322	5.68496	3.44272
122.654	4.75777	4.68804	5.98027	3.28901			122.654	5.07619	5.46092	5.71258	5.20128				121.982	6.68473	7.1918	6.167	3.60761			121.982	5.11328	4.74144	5.10907	3.42185
123.293	4.77985	5.41304	5.78495	3.60625			123.293	4.59585	5.80307	5.55084	5.07801				122.618	6.92068	7.52844	6.16408	3.52826			122.618	5.22454	3.7931	5.67792	3.6319
123.932	4.3308	5.36755	5.98167	3.41068			123.932	5.59636	4.55681	6.11442	5.04623				123.253	6.63894	4.8861	6.20266	3.66409			123.253	5.08249	4.17316	6.07197	3.73955
124.57	5.02459	3.31519	5.90033	3.40956			124.57	6.09855	3.74103	5.4206	5.50528				123.888	6.39669	5.7029	7.6259	3.875			123.888	4.80942	3.70064	5.87128	3.69223
125.209	4.80366	3.87968	5.76152	3.44852			125.209	5.6733	4.03607	5.71194	5.11558				124.524	6.92673	5.70626	6.44202	3.8338			124.524	5.46827	3.83195	6.09515	3.70599
125.848	4.66284	5.61232	6.01031	2.84386			125.848	5.00407	4.54786	5.71946	4.9225				125.159	7.09502	5.29279	6.30468	3.74827			125.159	5.04847	3.4408	5.84193	3.47917
126.487	4.55194	4.56586	5.62961	3.22201			126.487	4.06844	4.58167	5.96304	5.29457				125.794	6.84969	7.41825	6.66484	4.00132			125.794	4.89217	4.15896	5.75286	3.77218
127.126	4.70594	4.73113	5.91427	3.21388			127.126	4.5861	4.15225	6.16111	5.01165				126.429	5.61073	5.09268	6.32769	3.861			126.429	5.84537	3.73137	6.50531	3.46483
127.765	5.24467	5.01652	5.88226	3.34923			127.765	4.28318	4.34166	5.95303	5.13099				127.065	6.80183	5.0001	6.25757	3.46806			127.065	5.8985	3.92044	5.95057	3.64194
128.403	4.61075	5.76312	5.89448	3.37195			128.403	4.23217	5.55341	5.94128	5.23842				127.7	6.20819	5.5148	5.70162	3.70161			127.7	4.6973	3.88925	5.82293	3.97997
129.042	4.26472	5.43163	5.77783	3.40663			129.042	4.06906	5.1748	5.84412	4.89619				128.335	7.06175	5.21594	6.47865	3.71774			128.335	4.89864	4.5627	5.98644	3.81429
129.681	5.53949	4.39612	6.02058	3.17876			129.681	4.69062	4.65801	5.90391	5.29986				128.971	6.60482	5.06556	6.2329	3.67789			128.971	5.09649	4.36926	6.33437	3.55557
130.32	4.45494	4.69981	5.58663	3.23876			130.32	4.7775	4.77406	7.25549	5.26132				129.606	6.85153	4.99675	6.42755	3.7621			129.606	5.92413	4.59507	7.67067	3.62607
130.959	4.00854	5.06469	5.77002	3.43746			130.959	4.8116	4.91599	7.90782	5.10766				130.241	6.26866	4.94312	6.39731	3.66545			130.241	5.5755	4.00535	6.16254	3.49108
131.597	4.76538	4.76029	5.9166	3.64032			131.597	5.14062	4.93523	7.35368	5.16976				130.877	6.71714	5.05765	6.97682	3.78616			130.877	5.18638	4.79644	5.69268	3.67289
132.236	4.60925	4.96673	5.76854	3.39661			132.236	5.03525	5.18098	7.04962	5.17426				131.512	6.77119	5.01546	6.06961	3.82369			131.512	4.69469	4.09989	4.97753	3.62645
132.875	4.56197	5.30794	5.75902	3.40501			132.875	5.69839	4.78652	7.93932	5.13363				132.147	6.81923	5.08917	5.87226	3.69234			132.147	4.76527	4.68196	5.58506	3.61034
133.514	4.45556	4.59509	5.71039	3.55841			133.514	5.22795	5.65935	9.1779	5.39682				132.783	7.29884	6.71385	5.97374	3.61538			132.783	5.16199	4.57112	5.27443	3.73755
134.153	4.57591	3.80857	5.78534	3.31021			134.153	6.59757	5.04313	7.98386	5.07386				133.418	6.5708	7.77944	5.83131	3.50215			133.418	5.26071	4.15297	5.43539	3.53391
134.792	4.58294	4.36895	5.92025	3.55108			134.792	4.61246	5.63634	9.44346	5.13758				134.053	6.8066	5.61957	5.61528	3.57736			134.053	4.77642	4.93947	5.19836	3.73717
135.43	4.74606	4.08842	5.85841	3.39957			135.43	4.24914	4.69293	9.00358	4.87043				134.689	6.59246	5.83426	6.08893	3.68306			134.689	5.24904	4.28133	5.53976	3.60046
136.069	5.34417	4.93407	5.73627	3.45671			136.069	5.85546	5.25682	7.63926	4.92786				135.324	6.80034	5.59177	6.56072	3.31183			135.324	5.25908	4.23581	6.07185	3.34184
136.708	4.69917	3.93508	6.10892	3.38106			136.708	5.37298	4.94728	6.52346	5.38663				135.959	6.0999	5.7677	6.06324	3.84194			135.959	5.05365	4.46184	5.73382	3.35963
137.347	4.61904	4.7674	5.73391	3.47187			137.347	5.8158	7.15402	5.78421	5.02559				136.595	6.8143	5.24652	5.80226	3.74105			136.595	5.39241	4.00191	5.78337	3.46846
137.986	5.0387	4.14479	5.73519	3.47882			137.986	5.89368	5.79144	5.65868	5.16622				137.23	6.91053	5.11541	6.29949	3.49498			137.23	5.67281	5.19832	5.76507	3.51934
138.624	5.06504	5.03616	5.60507	3.57278			138.624	5.30499	5.58698	6.00299	5.30125				137.865	6.6068	5.10577	6.55255	3.70968			137.865	5.10185	3.62217	5.89389	3.51616
139.263	5.04554	4.62123	5.89374	3.60739			139.263	4.90358	6.37688	5.5168	5.29101				138.501	6.17327	4.82068	5.97348	3.7093			138.501	5.18912	4.46222	5.93353	3.50301
139.902	4.62892	5.03586	5.8642	3.56149			139.902	5.70138	5.9721	6.02533	5.28066				139.136	6.44756	5.28214	6.04102	3.75327			139.136	6.04477	4.03044	5.77845	3.62179
140.541	4.70568	4.69746	5.74828	3.75687			140.541	5.2407	6.90402	5.8479	5.14722				139.771	6.81127	5.44108	5.74507	3.7848			139.771	5.30767	3.78764	5.11338	3.4381
141.18	5.09326	4.59756	5.86475	3.75609			141.18	4.7536	4.83299	5.95002	5.02606				140.407	6.73736	6.46772	5.41026	3.81283			140.407	5.64458	4.28557	5.4919	3.4846
141.819	4.91706	4.53011	5.82859	3.72374			141.819	4.78889	5.259	5.48826	5.00245				141.042	6.29269	6.58826	5.67214	3.84997			141.042	5.50029	4.53866	5.48595	3.5434
142.457	4.64787	4.43767	5.77548	3.79912			142.457	4.82328	5.34577	5.57484	5.17718				141.677	6.49137	7.61462	5.52881	3.8638			141.677	5.3094	4.18353	5.41462	3.48223
143.096	4.79528	4.57032	5.83912	3.73536			143.096	3.84373	4.04704	6.15937	4.91785				142.313	6.83003	6.63313	6.02939	3.92617			142.313	4.54355	4.35048	5.73223	3.57642
143.735	5.09345	4.58718	5.83643	3.43531			143.735	4.20384	5.39008	6.116	5.04929				142.948	6.6319	5.42596	5.85595	3.76856			142.948	5.27902	3.69464	5.82432	3.50598
144.374	4.87806	4.33322	5.8335	3.39789			144.374	4.86192	4.49295	5.56577	5.02506				143.583	6.88722	4.90687	5.65789	3.70089			143.583	5.12186	3.95533	5.98698	3.68238
145.013	4.67189	4.07928	5.76287	3.86402			145.013	4.34546	4.86211	5.83862	5.12602				144.219	6.17014	5.40641	6.09673	3.79233			144.219	4.93013	3.89796	5.57983	3.40425
145.652	4.61059	4.22856	5.76901	3.30255			145.652	4.89854	4.60315	5.74112	5.06942				144.854	6.77318	5.17003	5.75327	3.73789			144.854	4.69055	4.33852	5.96742	3.576
146.29	4.52475	5.12092	5.84415	3.40781			146.29	4.94468	6.71656	5.64585	5.00013				145.489	7.20004	5.28723	5.75197	3.73654			145.489	5.46424	4.89686	6.12195	3.49407
146.929	4.88747	4.84677	5.76804	3.16473			146.929	4.68603	4.62495	5.11755	4.91071				146.125	6.85654	6.06488	5.82221	3.93726			146.125	5.31469	3.98166	6.28074	3.58013
147.568	5.24621	4.96833	5.94941	3.41131			147.568	5.44594	4.44367	5.71498	5.20471				146.76	7.02578	5.71215	5.88554	4.05293			146.76	5.62565	4.15555	6.1227	3.48958
148.207	4.74463	4.45183	5.63572	3.30692			148.207	4.53859	4.36731	5.17632	5.25813				147.395	7.09168	6.14513	5.90037	3.90207			147.395	5.00671	3.4922	5.77212	3.66905
148.846	4.88619	4.34501	5.64976	3.45839			148.846	4.31586	5.08861	6.76858	5.2688				148.03	6.59146	5.81899	6.2946	3.95944			148.03	5.04684	4.30517	6.09709	3.78243
149.484	4.5495	4.38035	5.79542	3.63886			149.484	4.60871	5.52374	5.49978	5.4668				148.666	6.93616	6.96092	6.08894	3.87279			148.666	5.5558	4.07811	6.02403	3.68747
150.123	4.90431	4.57724	5.8203	3.80267			150.123	5.08685	3.91268	5.66482	5.29612				149.301	6.75016	6.38261	6.08794	3.97001			149.301	4.97854	3.69183	5.94522	3.67526
150.762	4.8499	4.43557	5.82824	3.39963			150.762	5.09735	4.87894	5.72605	4.82773				149.936	6.74238	7.05092	5.8535	4.01607			149.936	5.24685	3.78216	5.8073	3.73313
151.401	4.9148	4.65801	5.78844	3.4541			151.401	6.38439	4.89177	5.55634	5.00536				150.572	6.65586	6.20686	6.17116	3.8997			150.572	5.82991	3.86965	6.13522	3.78341
152.04	5.88665	4.4086	5.74468	3.42334			152.04	3.99078	4.50465	5.73949	5.19776				151.207	6.56759	7.29096	6.00765	3.96162			151.207	4.90012	4.06095	5.81952	3.65263
152.679	5.06398	5.6352	5.70818	3.38647			152.679	5.21289	4.89709	6.8324	5.24928				151.842	6.58597	7.62719	5.37652	4.01042			151.842	4.93358	4.16207	5.83964	3.83111
153.317	5.98564	4.80276	5.82162	3.18944			153.317	4.72706	5.27319	6.48537	5.12347				152.478	6.74475	6.57469	5.29495	3.97176			152.478	5.34917	4.24362	5.36131	3.98139
153.956	5.38768	4.80207	5.63172	3.19588			153.956	4.68992	5.00181	6.06255	5.25847				153.113	6.55051	6.51518	6.02462	4.29642			153.113	5.34173	4.23572	5.77571	3.92507
154.595	5.05713	5.07895	5.7189	3.26508			154.595	4.47658	4.86021	6.55271	5.25246				153.748	6.64776	7.78961	5.54935	3.91603			153.748	5.12927	3.92392	5.19316	3.88551
155.234	5.49123	5.40869	5.81579	3.22835			155.234	4.89565	5.5045	6.16358	5.1741				154.384	7.178	7.95326	5.55093	3.93955			154.384	5.08947	3.84083	5.64417	3.57397
155.873	5.6898	5.04604	5.60423	3.74679			155.873	4.99507	5.17668	6.15194	5.12823				155.019	6.90061	7.27371	5.7162	3.9669			155.019	5.3024	4.58819	5.56696	3.90616
156.512	5.85675	3.89563	5.63233	3.70678			156.512	3.95084	5.44293	5.76023	5.35781				155.654	6.33645	7.65849	5.62125	3.81671			155.654	5.22966	4.56695	5.5622	3.69349
157.15	5.00956	3.83979	5.9482	3.99931			157.15	4.71685	4.88655	5.80117	5.66324				156.29	6.64483	6.46064	5.4308	3.85069			156.29	4.93768	3.91879	5.37435	3.86227
157.789	4.90767	3.75523	5.92105	3.51468			157.789	4.4382	4.31105	5.88213	5.23295				156.925	7.81487	5.04757	5.16459	3.76407			156.925	4.72755	3.80499	5.387	3.67209
158.428	5.70189	3.67501	5.73688	3.75164			158.428	4.71936	5.31097	6.18857	5.576				157.56	6.67971	6.5178	5.61305	3.64962			157.56	5.28867	4.01219	5.58149	3.46723
159.067	4.7796	3.84996	5.63768	3.58033			159.067	5.05182	5.26029	5.69114	5.14754				158.196	6.26068	6.98028	5.29488	3.67939			158.196	4.96586	3.88913	5.81887	3.87198
159.706	5.55309	3.35316	5.75846	3.63685			159.706	4.80363	4.12807	6.2042	5.53416				158.831	7.37503	6.65485	5.17522	3.75305			158.831	4.97496	4.40913	5.14301	3.92944
160.344	5.70485	3.30844	5.80757	3.38044			160.344	4.87801	5.0529	5.7339	5.95378				159.466	6.92107	6.27319	5.76191	3.7476			159.466	5.18756	3.94252	5.40553	3.74394
160.983	5.7103	3.86274	5.6988	3.29148			160.983	4.41925	4.43186	5.62282	5.78207				160.102	6.60736	6.03875	6.07503	3.58162			160.102	5.24546	4.01737	7.81263	3.85995
161.622	4.69046	3.62267	5.53736	3.78575			161.622	5.05446	4.53959	6.02783	5.55337				160.737	6.65822	6.01985	5.99055	3.63258			160.737	4.83995	4.5634	8.62377	3.84001
162.261	5.71007	3.85042	5.9046	3.60279			162.261	3.75265	4.62194	6.02482	5.48086				161.372	6.56684	5.82442	5.76299	3.77493			161.372	4.78137	3.79424	6.84029	4.09524
162.9	6.34608	3.32371	5.89391	3.77955			162.9	4.09322	4.18244	5.9138	5.47187				162.008	5.8145	5.48464	6.46731	3.88357			162.008	4.87637	3.9899	7.85388	3.76721
163.539	6.21061	3.18012	5.86218	3.68906			163.539	4.06168	4.96385	5.9931	5.44259				162.643	6.55331	6.10155	6.03645	4.16091			162.643	5.36377	4.00339	6.69293	4.22057
164.177	5.47077	3.77668	5.84707	3.71796			164.177	4.59153	3.34737	5.91503	5.38142				163.278	6.03005	5.39473	5.88374	4.10737			163.278	5.69236	3.17635	6.23805	3.90452
164.816	5.75982	3.79941	5.7521	3.52881			164.816	3.48981	5.1596	5.94107	5.52571				163.914	6.60792	5.44431	6.11078	3.7893			163.914	4.85172	3.82804	5.8129	4.17892
165.455	5.75379	3.4119	5.81346	3.3428			165.455	4.67676	4.46392	6.9238	5.49398				164.549	5.67279	5.9888	6.3457	3.76729			164.549	5.32259	3.96111	6.07075	3.89498
166.094	5.09509	3.97792	5.97015	3.19697			166.094	4.31464	4.43589	6.2362	5.27784				165.184	5.79535	5.40553	6.14983	3.83425			165.184	5.58313	3.43295	5.72546	3.96072
166.733	5.10635	3.52759	5.55359	3.08995			166.733	3.864	4.29512	5.77652	5.23807				165.82	5.83169	5.75723	6.21707	3.93555			165.82	5.0092	4.49565	5.77763	3.85327
167.372	5.30576	3.59107	5.45047	3.33488			167.372	3.94983	4.11476	6.41933	5.20205				166.455	5.19644	5.87613	6.73964	3.8674			166.455	5.33567	4.07555	5.93339	3.94985
168.01	5.46215	4.68635	5.82077	3.3885			168.01	4.18404	3.92159	5.70778	5.21528				167.09	6.23592	5.87624	6.35592	3.78521			167.09	5.40219	3.46279	5.072	3.7674
168.649	5.02012	4.69729	5.57159	3.38562			168.649	4.47069	4.64845	6.59437	5.44461				167.726	6.05588	5.60162	7.28787	3.70256			167.726	5.76878	4.05691	5.32827	3.74029
169.288	5.35564	4.12889	5.89338	3.29203			169.288	3.68294	4.52121	5.94277	5.52651				168.361	6.2409	5.74369	5.92804	3.64581			168.361	4.61208	3.25752	5.58853	3.86519
169.927	5.16204	4.49221	5.82263	3.38517			169.927	3.31886	4.39975	5.67224	5.26217				168.996	6.61886	4.99313	6.11943	3.8174			168.996	4.58933	3.81789	5.70688	3.77133
170.566	5.18539	4.21145	5.58138	3.16706			170.566	3.17698	4.73217	5.8302	5.36853				169.632	5.72158	5.65208	6.04375	3.81053			169.632	4.88623	4.31652	5.75143	4.01244
171.204	6.09803	4.62482	5.8892	3.72989			171.204	4.1239	4.76285	5.96877	5.74143				170.267	6.06686	5.85632	7.08397	3.59199			170.267	5.0944	4.24667	5.00276	3.89709
171.843	6.18394	3.95233	5.63427	3.4205			171.843	4.47555	4.06668	5.2722	5.52742				170.902	5.19904	5.51296	6.15818	3.74609			170.902	5.15631	4.51256	6.93382	3.43402
172.482	5.54828	4.06792	5.82951	3.80659			172.482	3.81785	4.42216	5.78084	5.36491				171.537	7.35032	5.75433	6.15014	3.65353			171.537	4.91481	3.73268	6.14674	3.90753
173.121	6.61398	3.53962	5.77804	3.57743			173.121	3.68011	5.05225	5.85051	5.53772				172.173	6.35916	6.47223	6.23849	3.54804			172.173	5.12382	4.26	6.42808	3.52143
173.76	6.00277	3.34496	6.01911	3.55493			173.76	3.67999	4.89745	5.7223	5.7662				172.808	6.47609	4.51927	6.08973	3.56657			172.808	5.2183	4.04496	6.25393	3.79569
174.399	5.4108	3.5925	5.79057	3.52809			174.399	3.59725	4.55221	5.96691	5.83739				173.443	5.62656	4.42916	6.09393	3.29063			173.443	5.00357	4.56911	5.94912	3.63719
175.037	5.03803	3.72444	5.79124	3.69728			175.037	4.18115	4.63138	6.20305	5.57297				174.079	5.95283	4.79108	6.28887	3.41182			174.079	4.94107	4.0002	7.31873	3.52762
175.676	6.65264	3.43172	5.87984	3.62422			175.676	4.67032	4.38709	5.42398	5.26366				174.714	5.86293	3.89197	6.17968	3.48384			174.714	4.8225	5.45611	5.27467	4.05127
176.315	4.62121	3.78321	5.781	3.79511			176.315	3.99956	4.96171	5.73103	5.74049				175.349	5.79784	4.39357	6.25524	3.66756			175.349	5.25278	4.26637	6.12709	3.92541
176.954	5.52298	3.59075	5.65826	3.97674			176.954	3.43111	4.29951	6.98885	5.64685				175.985	6.32363	3.93066	6.04341	3.89993			175.985	6.19394	4.45715	5.90585	4.05161
177.593	5.33251	3.50006	5.89107	3.41494			177.593	4.38873	3.81325	6.05106	5.44485				176.62	6.09652	4.55509	6.06517	4.07676			176.62	4.90701	4.20218	7.66356	3.84512
178.231	5.87976	3.63548	5.83275	3.40657			178.231	4.10257	4.09669	5.8558	5.39705				177.255	5.59648	4.14351	5.95281	3.85702			177.255	5.40705	4.29415	8.27308	3.99836
178.87	5.38358	4.22712	5.906	3.63002			178.87	4.39864	4.4069	6.09355	5.72385				177.891	6.10969	4.19556	6.23598	3.70224			177.891	5.2432	3.83397	5.50846	3.91235
179.509	5.34069	3.65652	5.78687	3.84838			179.509	4.49126	4.89054	6.14391	5.55122				178.526	6.46549	5.21882	5.97148	3.75054			178.526	4.59199	4.03565	5.34689	3.89973
180.148	4.77583	3.57295	5.61546	3.75087			180.148	4.25182	4.48412	5.83225	5.5734				179.161	5.79561	4.78513	6.00215	3.71379			179.161	4.67492	4.01623	5.2543	3.73414
180.787	5.44704	3.77999	5.9147	3.66635			180.787	4.66596	4.51832	5.60859	5.49294				179.797	6.05246	4.45851	5.75026	3.68144			179.797	5.27049	3.92222	5.09537	3.69515
181.426	5.13831	3.58909	5.82301	3.62704			181.426	3.90353	4.5032	6.06119	5.36527				180.432	6.7967	4.5141	5.84108	3.59422			180.432	6.001	4.13292	5.10675	3.73798
182.064	6.10886	4.30067	5.82873	3.40301			182.064	4.40621	4.30866	6.15711	5.41012				181.067	6.87867	4.28254	6.05082	3.50695			181.067	5.31139	3.86455	5.36439	3.59714
182.703	6.50463	3.70364	5.65827	3.52044			182.703	4.80055	4.2173	6.0847	5.4514				181.703	7.52831	4.67463	6.00973	3.79153			181.703	4.57933	4.46927	4.91353	3.90651
183.342	6.1282	4.03676	5.90313	3.59691			183.342	4.85271	4.63915	5.7476	5.57885				182.338	7.59526	4.6006	6.00268	3.60075			182.338	5.03936	3.80426	5.34551	4.19403
183.981	5.38575	4.03219	5.57652	3.43531			183.981	4.9226	4.68588	6.08238	5.74288				182.973	6.85131	6.54316	5.93243	3.90742			182.973	5.36279	4.5481	5.66695	3.84368
184.62	5.34471	4.22593	5.87958	3.50112			184.62	4.92902	5.34252	5.98659	5.4926				183.609	6.02674	4.94218	6.20078	3.70158			183.609	4.97779	4.01729	5.87511	4.09996
185.259	6.12048	4.07384	5.70685	3.40302			185.259	4.47635	4.98863	6.16509	5.70486				184.244	6.74246	4.51114	6.02976	3.99494			184.244	5.33974	3.55017	5.62847	4.19083
185.897	5.48283	3.69146	5.6474	3.48637			185.897	3.71819	4.36551	6.56454	5.88068				184.879	6.52609	4.49102	5.34859	3.8285			184.879	5.49615	4.23409	5.57522	3.98922
186.536	4.71372	3.41235	5.63758	3.38892			186.536	3.50019	4.25983	6.11777	5.24952				185.515	6.33081	4.62655	7.19828	3.5612			185.515	4.64559	4.19703	5.26945	3.9537
187.175	5.3518	5.19628	5.82784	3.33268			187.175	3.57072	4.3149	6.18006	5.29101				186.15	6.9344	4.52028	5.97879	3.49865			186.15	4.70381	3.75653	5.60392	3.81525
187.814	5.46567	3.47321	5.76266	3.68582			187.814	3.36919	4.72676	5.98691	5.43636				186.785	7.13402	4.37211	6.09022	3.6481			186.785	5.01387	4.37286	5.42447	3.93499
188.453	6.0878	3.43016	5.89663	3.63226			188.453	3.59696	3.97888	6.09111	5.50325				187.421	6.57727	5.25467	7.07248	3.80671			187.421	4.62972	4.87848	6.28148	4.03382
189.091	4.64631	5.04262	5.83987	3.50077			189.091	4.26796	4.98872	6.10202	5.24002				188.056	6.68059	6.04543	5.94272	3.57575			188.056	5.10667	4.54986	5.70743	3.89759
189.73	4.99174	3.85228	5.78242	3.52501			189.73	4.08142	3.56044	6.17749	5.81233				188.691	6.34744	4.30841	6.43804	3.59284			188.691	5.32617	4.51989	6.08663	4.06291
190.369	5.26009	3.28074	5.87461	3.29518			190.369	3.44644	4.85516	6.56838	5.35189				189.327	7.08077	4.50901	6.35571	3.76168			189.327	4.42626	4.40419	6.1139	4.26446
191.008	5.56356	4.13576	5.72015	3.55577			191.008	4.94193	4.59543	5.96796	5.63388				189.962	6.49711	4.17664	6.14014	3.45248			189.962	6.18553	4.29898	6.01853	3.87311
191.647	5.1578	4.77581	5.7254	3.27727			191.647	3.72681	3.79713	5.31528	5.28823				190.597	6.59867	3.99238	6.48871	3.75133			190.597	5.11245	4.43962	5.98725	3.70518
192.286	5.25242	5.00213	5.80949	3.39422			192.286	3.27052	5.25833	6.21426	5.52309				191.233	7.25357	6.55524	6.29848	3.78224			191.233	5.5358	4.28455	5.90875	3.75962
192.924	5.12444	4.74616	5.8195	3.38707			192.924	3.57533	5.67308	7.22397	5.31649				191.868	7.18206	5.01043	6.15319	3.46003			191.868	6.10977	4.1495	5.86205	3.61385
193.563	5.54166	3.77829	5.69214	3.54084			193.563	4.67477	4.51311	5.53313	5.49795				192.503	6.65479	4.71565	6.07091	3.58941			192.503	5.67692	4.15317	6.00128	3.6572
194.202	5.28892	5.40634	5.73016	3.57			194.202	4.70608	4.28588	5.81478	5.56956				193.139	6.61664	4.32311	5.93496	3.7562			193.139	6.15705	4.18447	6.01202	3.81469
194.841	5.06066	4.91876	5.73582	3.37516			194.841	5.13563	5.16904	5.81529	5.54924				193.774	5.7851	4.86499	6.2559	3.68007			193.774	5.25612	4.27707	5.44392	3.94244
195.48	5.10747	4.72354	5.90993	3.49279			195.48	3.37374	5.57049	5.85926	5.55478				194.409	6.32266	3.87315	6.97941	3.67808			194.409	5.31089	4.06869	5.79613	3.81992
196.119	5.57614	5.14936	5.79739	3.45517			196.119	4.68862	4.88044	5.23269	5.65377				195.044	7.31388	4.00977	6.3521	3.71285			195.044	5.08073	4.45491	5.98514	3.75277
196.757	4.86295	3.45516	5.73537	3.56373			196.757	4.70966	4.62499	7.53405	5.64499				195.68	6.87054	4.97024	6.74846	3.70444			195.68	5.29838	4.42612	5.0453	3.79896
197.396	4.92986	4.68589	5.89456	3.37738			197.396	4.74132	4.56323	6.88393	5.58633				196.315	6.58613	4.14039	7.12504	3.77926			196.315	5.04299	5.05091	5.86498	4.13968
198.035	5.09571	3.58338	5.85871	3.48237			198.035	4.57524	4.31534	5.46423	5.40588				196.95	5.991	4.40744	5.96983	3.67532			196.95	5.05827	4.25752	5.66016	3.83362
198.674	5.30349	3.74911	5.83777	3.71674			198.674	4.89358	4.33876	6.06392	5.60931				197.586	6.30484	4.43393	7.59149	3.7136			197.586	5.13902	3.68141	5.86652	3.87088
199.313	5.01304	3.55107	5.86214	3.49555			199.313	4.96028	4.31429	6.05652	5.3298				198.221	7.15036	4.53458	6.87116	3.78847			198.221	4.67636	4.40838	5.55635	4.02847
199.951	5.87458	3.46109	5.63197	3.40026			199.951	4.69717	4.46837	5.96041	5.50931				198.856	6.53685	4.36405	6.40108	3.64733			198.856	5.41211	3.779	5.88622	3.84036
200.59	4.95647	5.48215	5.70078	3.59704			200.59	4.46043	5.71153	5.84798	5.47853				199.492	6.61546	4.36287	6.84765	3.88084			199.492	5.12905	4.48653	6.00968	3.66798
201.229	5.56146	5.23486	5.9363	3.48394			201.229	4.95551	5.46593	6.14975	5.70285				200.127	6.76278	4.20495	5.96957	3.82129			200.127	5.05849	4.41417	5.95717	3.89027
201.868	4.67907	4.73881	5.86421	3.75425			201.868	4.79115	4.20519	7.76606	5.46141				200.762	6.00669	4.46421	6.39723	3.80644			200.762	4.80401	4.74995	5.804	3.83014
202.507	5.55781	5.04594	5.91987	3.60915			202.507	4.05285	5.08171	5.97938	5.6396				201.398	6.36588	4.2962	5.96755	3.71224			201.398	4.92038	4.78646	5.47297	3.61518
203.146	4.93316	5.30668	5.86402	3.67817			203.146	3.70732	4.97857	7.55185	5.48141				202.033	6.77401	3.99396	6.1509	3.65776			202.033	5.70419	4.60761	5.76553	3.87477
203.784	5.03717	3.4558	5.77222	3.47092			203.784	3.25654	4.57095	6.99697	5.33663				202.668	6.93922	3.8254	6.21082	3.65562			202.668	5.18342	4.86375	5.69942	3.65938
204.423	4.78872	3.69607	5.71527	3.5026			204.423	3.72831	4.68925	7.07555	5.46919				203.304	5.69171	4.0268	5.90371	3.49867			203.304	5.5011	4.77095	5.67846	3.74366
205.062	5.75835	3.94438	5.96007	3.43338			205.062	4.79591	5.28029	7.36337	5.25631				203.939	6.46955	4.40499	5.79868	3.7802			203.939	5.19026	4.08018	7.79247	3.75325
205.701	4.95874	3.74677	5.76123	3.402			205.701	4.73834	5.31226	6.2225	5.56129				204.574	6.33936	4.07698	5.88552	3.8415			204.574	5.13919	3.83096	7.68721	3.6393
206.34	5.3117	3.39812	5.84698	3.48041			206.34	4.93453	4.09722	7.43136	5.03659				205.21	6.41862	3.92043	6.09466	3.79061			205.21	4.88386	4.29298	5.49427	3.89897
206.978	5.01	3.58134	5.69403	3.47924			206.978	3.5676	4.3847	6.02208	5.20907				205.845	6.59762	4.5822	5.99421	3.78136			205.845	5.10382	4.38075	5.75693	4.13535
207.617	5.33188	4.26681	5.49205	3.61489			207.617	4.72294	5.09217	5.94029	5.17312				206.48	6.77889	4.33748	5.97774	3.85635			206.48	5.39978	4.16815	5.85238	3.75639
208.256	4.81449	3.78788	5.87325	3.41936			208.256	4.29335	3.85787	5.9203	5.05019				207.116	6.52566	4.63448	6.1048	3.67611			207.116	5.04168	4.60319	6.01981	3.76458
208.895	6.05338	3.93077	5.71747	3.46531			208.895	4.78764	4.5545	6.24877	4.89367				207.751	6.171	3.90945	6.1128	3.89071			207.751	5.08682	4.30546	5.97405	3.87875
209.534	4.85837	3.61499	5.96704	3.41545			209.534	4.59505	4.31346	5.85168	4.98224				208.386	6.78259	3.9366	6.15825	3.75895			208.386	5.10899	4.29284	7.57114	3.91646
210.173	4.70592	3.07832	5.7581	3.38302			210.173	3.87859	4.55623	5.51348	5.28005				209.022	5.89696	3.95739	6.25308	4.1502			209.022	5.66574	3.97428	6.32155	3.82103
210.811	5.40904	3.27708	5.82754	3.61919			210.811	4.20295	4.53011	6.14584	5.38019				209.657	6.63143	3.99471	6.32489	3.81277			209.657	5.16574	3.70549	5.71388	3.58924
211.45	5.13366	4.11151	5.86445	3.25027			211.45	4.58448	4.59471	5.835	5.24471				210.292	6.42104	4.33952	6.09584	3.96851			210.292	5.1239	4.05251	5.95631	3.68516
212.089	5.15018	3.95879	5.93656	3.50927			212.089	4.79609	3.90377	5.83151	5.26026				210.928	6.94627	4.08432	6.11048	4.02729			210.928	5.08431	3.94807	5.94661	3.56819
212.728	5.19296	3.62937	5.64349	3.51736			212.728	5.01935	4.63059	5.76696	5.2444				211.563	6.64733	3.88778	7.17026	3.8892			211.563	5.10252	4.19322	5.19837	3.79676
213.367	5.47259	3.51898	5.70292	3.51525			213.367	4.11801	4.27501	5.87141	5.18315				212.198	6.57389	4.29039	7.78417	3.53652			212.198	5.10872	4.00455	5.78235	3.66688
214.006	5.51828	5.21315	5.7458	3.38228			214.006	5.10459	4.85033	5.95066	5.07411				212.834	6.11548	4.89588	7.39491	3.84549			212.834	5.75693	4.74038	5.37993	3.61158
214.644	5.03795	3.69713	5.73836	3.62633			214.644	3.40577	4.71516	6.32656	5.04315				213.469	6.56513	4.05779	6.05685	3.89038			213.469	5.56651	4.21385	5.58688	3.72843
215.283	5.6187	4.07835	5.90264	3.50014			215.283	4.82138	4.55161	6.50343	5.37343				214.104	5.53421	5.03274	7.14465	4.05974			214.104	5.24576	4.55524	5.62625	3.7961
215.922	4.85335	2.96381	5.79764	3.35143			215.922	4.15041	4.15758	7.10621	5.31406				214.74	6.17953	5.3287	6.24704	4.05565			214.74	5.83536	4.4499	5.45543	4.16061
216.561	5.21882	3.81829	5.87233	3.43159			216.561	4.08544	4.64553	5.89227	5.36807				215.375	5.40601	5.83537	6.057	3.99877			215.375	5.43762	3.95422	5.88857	3.77971
217.2	5.03854	3.62691	5.71051	3.4706			217.2	5.31538	4.58608	5.77148	4.95023				216.01	6.57602	4.99614	5.88481	3.94573			216.01	5.95478	4.71984	5.70674	3.91619
217.838	4.86564	3.80031	5.65062	3.28806			217.838	3.16028	4.69813	6.0565	5.36547				216.645	5.54024	4.26708	6.01046	3.83838			216.645	5.16009	4.5989	5.63827	3.76033
218.477	5.3063	3.26586	5.74693	3.35457			218.477	4.75434	4.71462	5.97813	5.29024				217.281	5.97533	4.13924	6.19741	4.20957			217.281	6.00716	3.82598	5.4862	3.68993
219.116	5.85527	3.48054	5.39862	3.1568			219.116	4.52066	4.64147	5.90875	5.30685				217.916	6.1791	4.40094	6.52035	3.9779			217.916	5.65331	4.93745	5.71555	3.67241
219.755	6.35597	3.70822	5.85087	3.16198			219.755	4.67945	5.44468	5.71379	5.50137				218.551	5.28087	4.34405	6.19813	4.24212			218.551	5.28822	4.02298	7.9854	3.57743
220.394	5.04354	3.32706	5.76929	3.2579			220.394	5.34892	5.69481	6.06665	5.19848				219.187	5.63494	4.43766	5.95984	4.29519			219.187	5.03747	4.15857	6.16467	3.59667
221.033	5.17164	3.49108	5.86715	3.38571			221.033	4.05299	5.42558	6.08662	5.64187				219.822	5.57012	4.28878	5.93306	4.00261			219.822	5.35564	4.61269	6.37213	3.43265
221.671	4.86674	3.79852	5.74662	3.26281			221.671	4.81168	5.4678	5.99052	5.5303				220.457	5.82053	4.0413	5.79625	3.84692			220.457	4.96771	4.98056	6.15795	3.73971
222.31	5.23477	3.59111	5.81781	3.30171			222.31	4.6203	5.17173	5.66612	5.19404				221.093	6.31924	4.12534	5.8764	4.1594			221.093	5.48966	4.76897	6.00369	3.52896
222.949	5.4302	4.50364	5.83064	3.07725			222.949	4.58858	5.7728	5.73045	5.17262				221.728	5.5228	4.04099	6.22343	4.23271			221.728	5.36979	4.81236	12.4559	3.65354
223.588	4.976	3.54631	5.80815	3.38809			223.588	4.44184	5.11377	5.84715	5.10843				222.363	6.12919	4.14686	6.81727	3.82612			222.363	5.96955	4.96132	9.79332	3.57706
224.227	4.55088	4.35626	5.95059	3.22144			224.227	3.90856	5.19599	5.78179	5.216				222.999	5.69398	4.55792	6.16299	3.89417			222.999	4.97144	4.57628	9.12592	3.51686
224.866	4.89387	3.59356	5.50878	3.38479			224.866	5.11301	3.6792	5.61667	5.23149				223.634	6.99794	4.39659	6.29178	4.0508			223.634	5.12225	3.47878	7.31122	3.39325
225.504	4.65332	4.02071	5.81834	3.18946			225.504	3.81555	5.14864	5.78939	5.31569				224.269	6.5542	4.35807	7.13362	4.31127			224.269	5.36564	4.72105	8.6785	3.61969
226.143	4.48986	4.89336	5.83067	3.46733			226.143	4.72032	4.44224	5.22608	5.43508				224.905	6.34586	4.46738	5.84894	4.24198			224.905	5.23584	4.31394	7.88668	3.45523
226.782	4.83528	3.313	5.5725	3.55511			226.782	4.12491	5.12493	5.13699	5.21448				225.54	6.59543	4.1921	5.89652	4.26508			225.54	4.93487	4.53407	7.85745	3.71097
227.421	4.65175	3.66518	5.8511	3.50077			227.421	3.76277	4.73853	5.63343	4.88627				226.175	5.30928	3.99756	5.77171	4.24123			226.175	5.32669	4.39931	7.72553	3.84931
228.06	5.06156	3.89146	5.69474	3.24174			228.06	4.05822	4.94144	5.94417	4.81387				226.811	6.56067	5.09449	6.78816	4.05928			226.811	5.49088	4.461	7.76838	3.79037
228.698	5.43005	3.65333	5.67162	3.25984			228.698	4.19997	5.05521	5.6848	4.75067				227.446	5.85071	4.66269	5.96357	4.23881			227.446	5.39464	4.32697	8.29971	3.86481
229.337	5.20043	3.74713	5.56677	3.66971			229.337	4.64331	5.7328	6.10604	4.89369				228.081	5.85855	4.1596	6.12397	3.96025			228.081	4.77931	4.67293	10.0855	3.7897
229.976	5.05735	3.98916	6.07513	3.38696			229.976	3.49755	4.83529	5.90773	5.06452				228.717	6.36785	4.55886	5.74246	4.19294			228.717	5.01881	4.31975	7.84313	3.71528
230.615	4.92989	3.23573	5.7941	3.31781			230.615	5.01783	5.2647	5.82013	4.99886				229.352	6.74666	4.13685	6.02908	4.29212			229.352	4.78828	4.4316	8.04124	3.89001
231.254	4.73387	3.85636	5.80337	3.35875			231.254	4.10093	4.32001	5.5244	5.55222				229.987	5.73195	4.48698	5.86599	4.32596			229.987	5.05875	4.28759	9.62506	3.79441
231.893	5.15282	3.82121	5.75428	3.34346			231.893	4.12514	4.61757	5.99205	5.10798				230.623	6.26715	4.11987	5.25632	4.12067			230.623	5.40788	4.60074	11.327	3.81796
232.531	5.73712	4.09457	5.81182	3.41164			232.531	4.09371	5.22661	5.57373	5.09747				231.258	5.15803	3.86947	5.6226	3.86891			231.258	6.3959	3.56828	11.3756	3.84136
233.17	4.88493	3.94197	5.73691	3.3061			233.17	4.42026	5.35961	6.07551	5.38423				231.893	5.89631	4.32755	5.79951	4.21381			231.893	5.50041	4.18479	11.6561	3.74802
233.809	5.14727	4.36119	5.77814	3.64726			233.809	5.24899	3.44888	5.74586	5.35694				232.529	5.61182	4.08849	6.19428	3.93854			232.529	5.14136	4.23393	10.6008	4.10282
234.448	5.09975	4.67223	5.68567	3.66726			234.448	3.76603	4.3907	5.48809	5.18562				233.164	5.76816	4.32411	6.20712	3.9282			233.164	6.37132	3.89568	12.3525	4.11827
235.087	5.11882	4.97503	5.62824	3.99869			235.087	4.52519	4.75864	5.83169	5.36131				233.799	6.32661	4.58577	6.82944	3.73484			233.799	5.27633	4.39628	10.4424	3.84603
235.726	5.46702	4.88011	5.90578	3.51901			235.726	4.85766	4.26405	5.29834	5.30309				234.435	6.95444	4.97089	6.25267	4.08061			234.435	6.15479	3.87223	10.5217	4.19135
236.364	4.90416	4.7253	5.81276	3.65973			236.364	5.1798	3.80953	5.83214	5.33777				235.07	6.49982	4.31023	6.15102	3.6896			235.07	6.33669	3.69477	10.7901	3.85135
237.003	4.90439	4.20334	5.76765	3.54373			237.003	4.35881	4.84992	6.07052	5.32268				235.705	5.83635	4.23621	6.21501	3.82182			235.705	5.96046	4.63059	11.0122	3.58284
237.642	5.01517	4.41733	5.79385	3.48767			237.642	3.93341	4.16589	5.59383	5.16939				236.341	5.5351	3.92786	6.10719	3.73761			236.341	5.21974	4.84307	9.69589	3.63082
238.281	6.05381	3.97319	5.99525	3.37657			238.281	4.26264	3.8107	5.6584	5.01694				236.976	6.25124	4.64711	6.20283	3.93228			236.976	6.45697	4.8165	11.3664	3.71794
238.92	5.55009	5.05136	5.83117	3.58514			238.92	3.93475	4.64144	5.99371	5.25889				237.611	6.22644	5.14878	6.3983	3.94665			237.611	5.24905	4.6765	11.5491	3.63536
239.558	5.96346	4.29382	5.74744	3.33574			239.558	4.65215	3.73013	6.30765	4.93651				238.247	7.10857	4.75821	6.25935	4.06074			238.247	5.47809	5.13005	10.1067	3.82708
240.197	5.09477	4.53771	5.83396	3.27851			240.197	4.79574	4.27644	7.56865	5.2326				238.882	6.42287	4.8357	6.18246	4.29232			238.882	6.47815	4.78442	11.1817	3.73394
240.836	4.7829	3.99677	5.76155	3.30747			240.836	3.81716	4.35152	7.88234	5.10213				239.517	6.59289	4.38597	5.9849	3.99276			239.517	4.84452	4.03827	10.4464	3.527
241.475	5.56097	4.69814	5.84397	3.27288			241.475	4.49075	3.75292	5.96937	5.4841				240.152	6.63708	4.09218	6.33325	4.08194			240.152	5.23399	3.81243	12.394	3.64387
242.114	5.55216	3.50985	5.96088	3.13653			242.114	3.48571	4.63762	5.80742	5.34148				240.788	6.08104	3.91374	5.92716	4.2055			240.788	5.50351	4.44557	12.4615	3.68833
242.753	5.73016	3.7773	5.61113	3.03795			242.753	4.61508	4.34107	7.61348	5.30438				241.423	6.27302	4.52256	6.25531	3.9698			241.423	6.52859	4.52792	12.318	3.60314
243.391	5.29043	5.67463	5.85997	3.24158			243.391	4.14046	4.38028	7.58178	5.27907				242.058	6.21891	3.616	6.33322	4.18038			242.058	5.2042	4.31333	10.4953	3.84421
244.03	5.44544	5.69878	5.8121	3.13438			244.03	3.79115	4.22552	8.11867	5.57583				242.694	6.86964	4.56448	6.21967	4.09149			242.694	5.19775	4.66332	13.1356	3.66255
244.669	5.39686	3.55051	5.8432	3.04637			244.669	3.92172	3.86519	7.59754	5.20311				243.329	7.11953	4.09045	6.25948	4.16453			243.329	6.56784	4.28778	11.214	3.5774
245.308	5.4728	3.53937	5.99581	3.12612			245.308	4.25743	4.09884	8.98531	5.30209				243.964	5.59338	3.6266	6.21207	3.92146			243.964	6.71158	4.27012	12.8783	3.63289
245.947	5.00654	3.77357	5.59612	3.23264			245.947	3.78748	3.89328	6.0484	5.27139				244.6	6.52336	4.59797	6.52981	3.80931			244.6	5.98284	4.64204	13.4467	3.81406
246.585	5.57752	3.86479	5.82199	3.4015			246.585	4.0693	5.04253	7.99547	5.55822				245.235	6.5542	4.47763	6.44137	4.15834			245.235	5.2985	4.18067	12.1679	3.65424
247.224	5.05504	3.46409	5.79333	3.32484			247.224	4.28321	4.15265	7.30544	5.26285				245.87	5.73931	4.10293	7.79893	4.02238			245.87	6.20513	4.28431	11.7993	3.82759
247.863	4.64165	3.47741	5.6101	3.33667			247.863	4.93926	4.82493	8.84342	5.4812				246.506	6.04989	3.94813	5.29881	3.93365			246.506	5.32749	3.57622	11.2866	3.75722
248.502	5.3979	3.24458	5.72443	3.3469			248.502	4.1298	4.54992	7.64062	5.37022				247.141	5.90434	4.19916	7.99652	3.97887			247.141	5.67844	3.64802	10.8737	3.87949
249.141	4.88876	3.89835	5.70828	3.36001			249.141	3.76251	4.14593	6.54099	5.36807				247.776	6.26799	4.08365	4.69511	3.96563			247.776	5.93821	4.06772	11.1867	3.90135
249.78	5.67778	3.33393	5.76589	3.29518			249.78	5.03798	4.50467	7.33495	5.3495				248.412	5.69533	4.27027	4.73596	4.04729			248.412	6.01313	4.35621	12.1238	3.84267
250.418	4.86181	3.63081	5.86347	3.56348			250.418	5.17217	4.44037	6.67115	5.13407				249.047	6.5613	5.76518	7.40363	4.07455			249.047	5.53522	4.23136	11.9886	3.64069
251.057	4.95981	3.81241	5.89057	3.63519			251.057	5.38797	4.59804	7.00121	5.39453				249.682	5.78212	3.48702	5.67033	3.86414			249.682	5.66667	4.22115	11.8822	3.83431
251.696	5.46303	3.53178	5.76482	3.36519			251.696	4.23984	4.459	9.64671	5.15107				250.318	6.96031	4.68511	5.42811	4.04861			250.318	5.25777	5.64909	11.7195	3.95948
252.335	5.29335	3.67278	5.62982	3.56065			252.335	4.93338	4.54465	13.6108	5.2156				250.953	6.87275	3.90561	6.04798	3.81716			250.953	5.48601	5.05788	11.37	3.93757
252.974	5.58255	3.39574	5.91842	3.65397			252.974	3.80663	5.04119	7.1696	5.11128				251.588	6.22193	4.32789	5.74202	3.92533			251.588	5.43501	4.74752	11.534	3.77606
253.613	4.75687	3.77295	5.64919	3.32763			253.613	4.8588	4.9103	5.81439	5.20391				252.224	6.49726	4.4843	5.05303	4.01558			252.224	5.07373	3.65535	10.9357	3.85197
254.251	5.38339	3.46905	5.94057	3.20864			254.251	3.78744	4.44713	7.74451	5.07824				252.859	6.57124	3.81438	5.58563	4.0196			252.859	6.38678	3.77738	11.8824	3.52782
254.89	6.04335	3.48473	5.75325	3.30985			254.89	4.46957	4.70238	7.96899	4.97924				253.494	6.17971	4.06219	5.009	4.17609			253.494	5.19204	5.10834	12.3102	3.73687
255.529	4.27064	3.76037	5.73806	3.43447			255.529	5.0459	4.47751	8.60805	5.12993				254.13	7.1911	3.93421	5.79247	3.69902			254.13	5.32506	4.62717	10.5666	3.79692
256.168	5.66036	3.45835	5.72335	3.08489			256.168	4.62473	4.98018	8.43942	5.01745				254.765	5.41379	3.998	5.91456	3.81157			254.765	5.32898	4.34621	8.27696	3.85981
256.807	5.03432	4.07589	5.66458	3.41811			256.807	5.52585	3.68655	9.26282	5.12522				255.4	6.80012	3.40996	5.88045	3.81827			255.4	5.78974	4.68534	11.7607	3.79479
257.445	5.31908	3.72942	5.79896	3.30784			257.445	4.26725	4.98779	10.4398	4.78332				256.036	6.79889	3.81087	6.25378	3.72473			256.036	5.50489	4.56346	11.7153	3.77991
258.084	4.75586	4.06189	6.01225	3.20973			258.084	3.88759	4.89876	7.67506	5.19967				256.671	5.81246	4.2382	5.99596	3.80877			256.671	6.95989	3.74691	10.8099	3.89572
258.723	4.78798	3.44248	5.86703	3.3955			258.723	3.77678	5.97239	7.21547	5.04163				257.306	6.09186	4.57128	5.94358	3.68694			257.306	5.28376	4.11093	10.171	3.9876
259.362	5.64441	3.87084	5.84207	2.9286			259.362	3.98266	4.38712	8.03209	5.06246				257.942	6.57143	3.76688	6.16972	4.0842			257.942	4.97877	4.15269	7.35177	3.90226
260.001	5.09753	3.58028	5.84488	3.29352			260.001	3.63664	4.75355	7.5406	5.15228				258.577	6.35326	3.85667	5.88566	3.84419			258.577	5.14676	4.64519	6.02036	3.73186
260.64	4.67462	3.69877	5.93584	3.2413			260.64	4.11985	4.14261	7.77158	5.08328				259.212	6.59392	4.18266	6.02828	3.66505			259.212	5.15824	4.22402	5.93168	3.84412
261.278	5.09402	3.45525	5.82872	3.36015			261.278	3.6971	5.21496	9.26783	5.01237				259.848	6.31478	4.1055	5.48633	3.79713			259.848	5.6269	4.80781	5.90104	3.95777
261.917	5.37599	3.62126	5.74797	3.29644			261.917	4.60093	3.98675	9.89793	4.64792				260.483	6.37744	3.96694	5.82683	3.80281			260.483	5.35468	4.54394	5.86694	3.9387
262.556	5.30833	3.41794	5.85418	3.59698			262.556	3.71397	4.1022	10.2243	5.11722				261.118	6.60192	3.92929	6.073	3.94665			261.118	4.84632	4.68212	5.84395	4.04271
263.195	5.21355	3.87318	5.87082	3.68716			263.195	5.29138	4.40625	13.0077	5.03825				261.753	6.03455	4.12863	5.96372	3.99783			261.753	5.56006	4.60375	5.13244	4.06762
263.834	5.44214	3.68174	5.73323	3.64505			263.834	4.66084	4.40379	13.9949	4.68276				262.389	6.15466	4.0746	6.30641	4.06429			262.389	5.46685	4.16673	5.53985	4.1228
264.473	5.55592	3.27267	5.75438	3.41232			264.473	4.81368	5.05993	11.9534	5.0073				263.024	6.12397	3.9587	5.994	3.98925			263.024	5.53957	4.39194	5.29563	3.68178
265.111	5.63066	3.51183	5.78104	3.63787			265.111	4.75807	5.60258	14.2399	4.83757				263.659	6.22235	4.07814	6.12742	3.98034			263.659	5.66608	4.01525	5.87735	3.9715
265.75	6.6033	3.43504	5.85752	3.49978			265.75	3.74794	4.05823	14.7396	5.0509				264.295	6.96767	3.87555	9.98572	4.06207			264.295	5.34703	4.11961	5.92933	3.82486
266.389	4.93841	3.59492	5.74988	3.5357			266.389	4.39577	4.46059	14.3687	4.81728				264.93	6.93349	4.03374	13.256	4.09923			264.93	6.38376	4.15659	5.99816	4.11166
267.028	5.81775	3.37491	5.80034	3.95324			267.028	4.25814	5.12077	17.3549	5.16896				265.565	7.03205	3.74962	19.839	3.78846			265.565	4.96199	3.94167	5.83857	3.83636
267.667	5.57485	3.62631	6.02997	3.76074			267.667	3.4374	4.82545	16.7091	4.89391				266.201	7.33316	3.56925	24.1003	3.63436			266.201	5.6388	4.66507	6.51575	3.86777
268.305	6.3834	3.47657	5.72059	3.88744			268.305	5.02454	4.55424	14.5936	4.93034				266.836	6.5148	3.70791	28.5145	3.95228			266.836	5.29337	4.83313	6.13459	3.85078
268.944	5.04405	3.37979	5.78132	3.77942			268.944	4.98513	4.62138	15.1279	4.90458				267.471	6.36437	4.06877	29.3525	3.96492			267.471	5.07282	4.93436	5.91909	3.74316
269.583	4.87753	3.92635	5.81946	3.51879			269.583	4.98463	4.87995	16.5562	4.98815				268.107	5.84698	3.78361	32.5702	3.81241			268.107	5.33634	4.07764	5.97294	4.01837
270.222	5.08732	3.4214	5.7611	3.65612			270.222	5.59113	4.76224	17.3065	4.90467				268.742	5.8154	4.49624	26.4762	3.70592			268.742	5.76476	4.43753	5.50962	3.89026
270.861	5.51659	5.09043	5.64951	3.84489			270.861	3.76802	4.58552	15.6049	4.75302				269.377	6.33062	3.56922	31.8906	3.73786			269.377	5.49926	4.45649	5.26311	3.46965
271.5	5.55962	3.38125	5.82982	3.65427			271.5	4.06299	4.32927	14.3756	4.82647				270.013	6.55308	3.87459	45.9451	3.73927			270.013	5.54688	3.87139	5.53472	3.67877
272.138	5.43431	3.5861	5.64335	3.68246			272.138	4.74974	5.74225	15.1535	4.88751				270.648	6.53195	4.01865	51.0648	3.75617			270.648	5.30498	4.07448	5.09576	3.9134
272.777	5.08648	3.71255	5.94925	3.84897			272.777	4.0235	4.7816	16.6013	4.76411				271.283	6.35691	3.95416	35.4398	3.79324			271.283	5.17791	4.50315	6.00558	3.84003
273.416	5.29793	3.6991	5.80752	3.68888			273.416	5.52795	5.38415	13.1847	4.7391				271.919	6.37284	4.46546	39.8299	4.01691			271.919	5.02242	4.1593	5.26278	3.76927
274.055	4.75022	3.8893	5.83306	3.96257			274.055	4.2783	4.90864	13.1153	4.84765				272.554	6.6127	4.71573	39.6034	3.77734			272.554	4.69489	3.78621	6.47514	3.94034
274.694	5.23657	3.17142	5.6901	3.93746			274.694	5.12537	3.93091	13.102	4.71258				273.189	7.00085	4.2769	45.3957	3.66697			273.189	5.74806	4.13413	7.01087	3.72616
275.333	5.13948	3.80013	5.48957	3.73183			275.333	3.45208	4.76062	12.7529	4.85814				273.825	6.51892	3.95332	54.4239	4.09621			273.825	5.26775	4.51042	7.20279	3.65538
275.971	5.00154	4.41473	5.80802	3.75798			275.971	4.3954	4.87926	12.3263	4.99904				274.46	7.46908	3.49457	51.5997	4.02366			274.46	5.15609	4.40179	5.84059	3.93317
276.61	5.10208	5.0588	5.91641	4.06292			276.61	4.20718	4.18288	12.2054	5.00952				275.095	6.57311	4.35671	52.2009	4.15698			275.095	5.29295	4.17624	5.84663	3.88314
277.249	5.80934	3.8095	5.6908	3.79437			277.249	3.66899	4.44106	11.8749	5.10874				275.731	6.34257	4.37999	52.2501	4.31878			275.731	5.2867	4.44313	5.89144	4.08902
277.888	5.36255	3.61501	5.88278	3.94584			277.888	4.07585	4.12143	9.17821	5.01966				276.366	6.7482	4.23546	62.6101	4.51572			276.366	5.15134	4.4924	5.98516	4.02167
278.527	5.37948	3.65426	5.76678	3.8074			278.527	3.87513	4.06157	11.6566	5.173				277.001	6.8853	4.06328	77.0791	4.16278			277.001	5.03204	4.28637	8.74134	3.71696
279.165	5.64412	3.70898	5.80241	3.82483			279.165	3.71768	4.2628	14.5498	5.00312				277.637	5.96595	4.20238	78.3508	3.99892			277.637	6.02163	4.14042	6.14589	3.71884
279.804	5.39372	3.24967	5.76184	3.851			279.804	4.00584	4.23546	11.6653	5.23496				278.272	5.84836	4.43856	75.0355	4.08516			278.272	4.8883	4.12612	5.9836	3.79284
280.443	5.70637	3.30407	5.85176	3.7228			280.443	3.93973	4.74619	6.73373	4.65864				278.907	6.78119	4.95001	71.1529	4.20267			278.907	5.23161	4.09705	7.08618	4.0483
281.082	5.63389	5.4048	5.79747	3.91011			281.082	4.23637	3.70922	7.79896	4.7927				279.543	6.07555	5.24396	73.2241	4.20457			279.543	5.20155	4.40639	7.25791	3.94301
281.721	5.70603	3.58609	5.93433	3.45493			281.721	3.68733	4.78755	5.43744	4.96505				280.178	6.06841	4.14459	71.3846	4.06388			280.178	5.25659	4.60767	6.48271	3.65223
282.36	5.22837	3.70634	5.75008	3.85528			282.36	4.22477	3.5713	5.45869	4.91308				280.813	5.69625	4.16961	75.2444	4.13626			280.813	4.82665	3.84748	5.62114	3.74662
282.998	5.569	3.22782	5.6824	3.48253			282.998	3.96887	3.53481	7.01284	4.71584				281.449	6.63884	4.53338	69.859	4.06992			281.449	5.41653	4.19165	6.16143	3.83409
283.637	5.10881	3.39396	5.95044	3.43861			283.637	4.57384	3.65437	6.67428	5.0113				282.084	7.04645	4.86773	71.6237	4.16495			282.084	5.13983	4.16132	6.9372	3.6243
284.276	5.84197	3.79323	5.91506	3.74467			284.276	4.51309	4.38291	7.68252	5.1845				282.719	6.60202	4.85015	58.157	3.79026			282.719	5.39662	4.10663	5.76359	3.73318
284.915	5.3016	3.93314	5.66594	3.62016			284.915	4.54688	3.84525	6.44885	4.95651				283.355	6.36693	4.25664	78.1377	4.00399			283.355	4.58514	4.06085	5.81202	3.65846
285.554	5.3858	3.5416	5.85502	3.63801			285.554	4.11297	4.54899	5.965	5.05891				283.99	6.90625	4.08692	80.9092	3.99297			283.99	5.0369	3.44838	6.03094	3.65088
286.192	4.95752	3.38123	5.78229	3.66787			286.192	4.70407	4.6346	7.386	5.06812				284.625	7.21289	4.81811	71.6244	3.77539			284.625	4.87132	4.56194	5.23328	3.93218
286.831	5.36651	4.05294	5.96013	3.81235			286.831	5.34382	4.51555	12.9055	4.76663				285.26	6.90967	4.66414	72.4442	3.98642			285.26	4.80098	4.24867	5.85072	3.94285
287.47	5.27684	3.79268	5.83377	4.15966			287.47	4.82913	5.23158	15.7234	4.92783				285.896	6.53815	5.7683	86.6267	4.19129			285.896	5.50178	4.7011	5.60086	4.15781
288.109	5.37513	5.30311	5.82114	3.72701			288.109	4.33845	3.40515	16.7201	4.83824				286.531	6.58281	5.51507	90.1865	4.08018			286.531	5.02145	3.63693	5.49739	4.24672
288.748	4.90938	3.98899	5.82592	3.71654			288.748	3.66637	4.30794	22.4588	5.12885				287.166	6.55201	4.01911	83.4993	4.0137			287.166	4.69502	4.78705	6.86889	4.0184
289.387	5.28409	5.2399	5.87189	3.67942			289.387	4.38053	3.81467	17.7063	5.08498				287.802	6.49119	5.04564	73.1834	3.89037			287.802	5.37509	4.62384	6.66928	3.83154
290.025	5.38454	3.58083	5.80298	3.94554			290.025	3.88027	3.6942	16.2445	5.12497				288.437	7.15548	5.87109	66.2341	4.05874			288.437	4.59824	5.75125	7.18999	3.73568
290.664	5.19155	3.86642	5.98707	3.72617			290.664	5.02463	3.61732	14.079	4.98141				289.072	6.9867	3.31896	67.9691	3.95807			289.072	5.5994	3.71967	6.66963	3.89137
291.303	5.23731	3.85404	5.89138	3.95772			291.303	4.84607	4.07674	9.53091	5.28176				289.708	6.88111	3.93086	86.0427	3.90664			289.708	4.90995	4.93129	7.25108	4.27328
291.942	5.9234	3.4259	5.94555	3.55802			291.942	3.84405	5.05317	23.8915	4.96149				290.343	6.43847	4.23325	79.1822	3.70218			290.343	4.73939	3.95016	7.54312	3.94163
292.581	5.39581	3.39346	5.79341	3.7509			292.581	4.36021	4.06891	20.7902	4.85453				290.978	5.86892	3.85712	92.5088	4.03138			290.978	5.61529	4.54669	13.0761	3.97283
293.22	5.27057	3.92213	5.69433	3.72814			293.22	3.56186	4.95062	20.3079	4.94969				291.614	6.95991	3.90602	97.1047	3.78407			291.614	5.25544	4.39561	13.3891	3.97608
293.858	5.13321	3.24615	5.82077	3.41476			293.858	4.12588	4.50872	16.6227	4.94465				292.249	6.97327	3.92058	85.7399	3.97464			292.249	4.79212	4.54904	13.1073	4.28526
294.497	5.47612	3.87845	5.98008	3.70517			294.497	4.57393	4.39081	32.7283	5.25703				292.884	6.66235	4.19611	84.9123	3.82365			292.884	5.02554	4.54965	10.8305	4.07881
295.136	5.27082	3.72575	5.722	3.39839			295.136	3.70836	4.78063	26.5529	4.79436				293.52	7.3296	4.31465	79.929	3.98379			293.52	5.05311	4.59077	14.2387	3.61928
295.775	5.84495	4.19196	5.77994	3.5207			295.775	4.64269	4.00894	28.9257	4.91173				294.155	6.25739	4.19471	68.3792	3.99232			294.155	4.86807	3.89967	11.957	3.9888
296.414	5.87631	3.83612	5.93846	3.45171			296.414	5.21224	3.60134	20.5053	5.15114				294.79	6.12246	3.84829	70.6692	3.94033			294.79	4.79989	4.6328	13.0733	3.96361
297.052	5.27221	3.49473	5.88849	3.39549			297.052	5.17424	4.43418	20.3278	5.15393				295.426	6.70117	4.26956	79.2238	3.83609			295.426	5.23067	4.62912	11.9291	4.09031
297.691	4.94867	3.87281	5.88958	3.51809			297.691	4.10036	4.10427	27.6558	4.87219				296.061	6.15021	4.1988	77.5044	3.79096			296.061	5.89905	3.66746	11.8906	4.33319
298.33	5.14214	3.58873	5.79709	3.45464			298.33	3.91681	4.59383	23.2984	4.89601				296.696	6.8584	3.58757	55.8604	4.15858			296.696	4.86415	4.2982	12.385	4.09052
298.969	5.08843	3.39757	6.0143	3.41178			298.969	3.90441	4.7463	15.4997	5.19276				297.332	6.74883	4.56738	65.6427	3.8593			297.332	5.18079	4.44491	12.9292	3.8277
299.608	6.7562	3.26593	5.96576	3.1181			299.608	4.18315	4.11594	12.129	5.15612				297.967	6.55624	3.85813	65.5703	3.78194			297.967	5.50084	4.93344	13.7302	4.00029
300.247	6.47613	3.48089	5.81496	3.46321			300.247	4.54283	3.86827	11.7115	4.94565				298.602	6.77911	4.22995	78.1025	3.8128			298.602	5.30304	4.40863	17.7064	3.81243
300.885	4.94775	3.59659	5.65178	3.36903			300.885	5.37127	4.20229	23.4493	4.97867				299.238	6.83036	4.19954	66.2956	3.83845			299.238	5.50386	5.22125	24.4427	3.8197
301.524	5.20948	3.53281	5.7565	3.52302			301.524	4.36562	4.16404	26.4892	5.14948				299.873	6.54327	4.0028	51.0454	3.75972			299.873	5.14686	4.73101	21.1995	3.97913
302.163	6.15072	3.97169	5.92259	3.34136			302.163	4.32726	4.70503	26.3789	4.97297				300.508	6.69921	4.30284	38.3154	3.9057			300.508	5.00202	5.35687	19.5465	4.08697
302.802	4.88359	5.88756	5.901	3.39851			302.802	3.70953	4.49385	36.4007	4.93717				301.144	5.93596	3.87007	37.7757	3.87467			301.144	4.93975	4.10005	29.4263	3.85758
303.441	5.39107	3.52943	5.7191	3.43793			303.441	3.80533	4.20631	58.7026	4.90199				301.779	6.64639	4.22923	33.4661	4.07459			301.779	5.25864	3.70882	19.5388	4.01318
304.08	5.02521	3.60878	5.74598	3.25954			304.08	4.43342	4.63433	36.665	5.22171				302.414	6.4538	4.79273	32.7291	3.99927			302.414	5.06866	4.9292	23.6007	3.72048
304.718	5.38776	3.80286	5.84031	3.20204			304.718	3.4413	5.34173	42.6168	5.53271				303.05	6.64409	3.98109	35.0793	4.17517			303.05	5.95608	3.80649	18.1193	3.71028
305.357	5.62367	3.35396	6.0377	3.34635			305.357	4.03809	4.62739	41.1781	5.67339				303.685	6.07123	3.90429	34.8942	4.29007			303.685	6.22755	4.3336	25.0001	3.52087
305.996	4.91487	3.74153	5.75955	3.40775			305.996	3.66273	4.40853	26.2724	5.41868				304.32	4.79735	4.64229	34.4198	4.07529			304.32	5.01014	4.41725	26.2248	3.97677
306.635	5.33224	3.8885	5.65155	3.54502			306.635	3.94679	4.75956	44.1935	5.25996				304.956	5.90021	4.20951	36.3347	3.95252			304.956	5.54885	4.71916	24.7051	3.74307
307.274	5.25427	4.01108	5.5892	3.63387			307.274	4.29522	4.56763	41.6835	5.442				305.591	6.24108	4.32364	36.2657	3.9102			305.591	5.9287	4.47226	28.1347	3.62261
307.912	5.63041	3.42712	5.73337	3.30754			307.912	4.32829	4.19005	46.0962	5.22341				306.226	6.9457	3.9429	38.5891	3.84704			306.226	5.75601	4.00254	27.6591	3.52171
308.551	5.05514	4.17488	5.71284	3.2935			308.551	3.59084	3.86982	54.8115	5.09149				306.861	6.08988	4.02668	44.8518	3.78143			306.861	6.05419	4.50984	21.6377	3.53588
309.19	5.67772	3.67997	5.76589	3.2938			309.19	3.94093	4.5573	47.9488	5.08245				307.497	6.08479	4.11174	34.1258	3.99225			307.497	6.44198	4.92428	21.3799	3.59219
309.829	4.69603	3.82063	5.62714	3.14985			309.829	3.36082	4.447	49.0159	4.58348				308.132	6.45774	4.5009	53.5164	4.09342			308.132	5.29528	4.09923	20.1311	3.74859
310.468	5.27451	3.68079	5.90756	3.34586			310.468	4.17535	4.25158	52.5571	4.72156				308.767	6.80551	4.30394	56.2773	4.10336			308.767	6.60043	4.34163	19.578	3.59053
311.107	4.89511	3.62638	5.87807	3.34737			311.107	3.68154	4.69849	66.8634	5.00423				309.403	6.64096	5.64943	97.8379	3.84749			309.403	6.42488	4.88712	31.4811	3.49712
311.745	5.06566	3.62676	5.79919	3.38665			311.745	3.97469	4.6898	79.3936	5.02217				310.038	6.76081	5.07426	52.9603	3.96752			310.038	6.0906	4.40557	34.1554	3.25692
312.384	5.09201	3.89269	5.70087	3.36502			312.384	3.93718	4.07328	82.705	5.12766				310.673	6.75608	4.27	74.6574	3.73328			310.673	6.526	4.7589	33.6219	3.64073
313.023	5.56315	3.74123	5.91184	3.51653			313.023	3.74419	4.91458	77.2258	4.85656				311.309	6.67455	3.89379	92.6219	3.82111			311.309	6.24686	4.24552	43.0932	3.65775
313.662	5.10895	3.53027	5.65301	3.53013			313.662	4.09944	4.21839	81.6905	4.84867				311.944	7.29468	3.86636	89.3525	3.91629			311.944	6.45947	4.18286	42.3185	3.51781
314.301	5.29175	3.83516	5.72558	3.44126			314.301	5.15069	3.98135	82.002	4.71855				312.579	6.64171	3.90741	63.1888	4.00851			312.579	5.32956	4.51203	39.9079	3.93044
314.94	5.55632	3.37816	5.84119	3.40582			314.94	3.77894	4.14406	80.1366	4.93333				313.215	6.1332	4.89944	57.1956	4.04253			313.215	5.20442	4.10943	37.2623	3.61633
315.578	4.85542	3.71976	5.61826	3.60441			315.578	3.55507	4.08183	78.0811	4.87434				313.85	5.98644	4.01318	55.7789	4.34188			313.85	4.57463	5.78362	30.6761	3.74841
316.217	5.26431	3.18546	5.90932	3.66819			316.217	3.5009	5.23491	79.061	4.79844				314.485	6.66108	4.10616	69.8167	4.09952			314.485	6.66568	4.12915	34.4834	4.05901
316.856	5.13843	3.74627	5.89959	3.82538			316.856	4.01109	5.84433	67.1811	5.16098				315.121	6.42322	4.20786	73.96	4.05031			315.121	7.02891	4.11777	31.6307	3.89242
317.495	4.53298	3.92292	5.72569	3.55052			317.495	3.52665	4.38341	51.5688	4.69229				315.756	6.43406	4.87499	62.5652	4.23502			315.756	5.49644	3.86076	37.783	3.88887
318.134	4.72632	3.27051	5.83886	3.69107			318.134	3.82122	4.11485	56.9137	5.10878				316.391	6.42897	4.83891	67.6281	4.09817			316.391	6.35451	4.03277	32.6699	3.82334
318.772	5.34372	3.76701	5.98914	3.72028			318.772	4.44959	4.49059	49.9941	5.38554				317.027	5.71286	4.58412	70.9768	4.04666			317.027	6.94648	3.7311	30.1395	3.71023
319.411	5.31796	3.74807	5.77457	3.60339			319.411	3.9188	5.30831	56.4147	5.20893				317.662	6.32244	4.3215	61.0517	4.34946			317.662	7.82095	4.48835	30.7926	3.87493
320.05	5.01652	3.59779	5.68693	3.54114			320.05	3.61791	4.35062	49.3398	5.25161				318.297	6.85962	5.3366	64.4132	4.25069			318.297	7.17131	4.22237	30.2925	4.01427
320.689	5.69633	3.4269	5.87255	3.70637			320.689	4.61125	4.35768	48.7397	5.23622				318.933	5.94956	4.21709	61.7993	4.40642			318.933	7.78386	4.78117	30.3759	4.33968
321.328	4.729	3.38574	5.756	3.9146			321.328	5.1174	4.3391	48.4329	5.39738				319.568	6.45425	3.86809	82.721	4.31468			319.568	7.65109	3.68735	36.6564	4.25604
321.967	5.33222	3.49609	5.50168	3.63128			321.967	4.88069	3.66709	51.4186	5.34383				320.203	6.51724	4.32626	72.3107	4.17203			320.203	7.26807	3.93279	48.2503	4.21124
322.605	5.37007	3.52653	5.87589	3.54762			322.605	4.07593	4.57406	54.2781	5.22176				320.839	6.45771	3.99644	71.3825	4.11691			320.839	6.71604	5.1382	32.5595	4.33708
323.244	4.52278	3.97066	5.71569	3.69497			323.244	4.87903	3.95094	68.1965	5.40698				321.474	6.59752	3.93623	69.1647	4.15061			321.474	6.93526	5.42785	45.7703	4.38246
323.883	5.49653	4.82082	5.72664	3.81539			323.883	4.10322	4.25175	64.2342	5.52697				322.109	6.13423	3.69215	70.0567	4.07542			322.109	6.21102	4.21945	50.6568	4.45548
324.522	4.89262	4.26483	5.64799	3.49454			324.522	3.87293	4.04422	80.2431	5.52342				322.745	6.04697	3.77975	82.9448	4.0978			322.745	6.06607	4.08899	47.4023	4.15906
325.161	4.89009	3.49292	5.71318	3.69426			325.161	3.27068	5.64328	64.0331	5.46686				323.38	6.97568	4.02655	77.9452	4.07595			323.38	7.68646	4.14392	54.0449	4.33555
325.799	5.22431	3.86253	5.85718	3.52481			325.799	4.63129	4.97188	70.1903	5.05118				324.015	7.12473	4.25254	104.795	4.12074			324.015	6.11212	4.54258	48.8877	4.14411
326.438	4.94697	3.50955	6.01384	3.68211			326.438	3.56068	4.64278	65.2521	4.98634				324.651	6.31349	4.49315	88.5724	4.14772			324.651	6.88907	5.01781	46.3441	3.98924
327.077	5.1644	3.87865	6.19756	3.52881			327.077	4.06627	4.36156	75.1851	4.98706				325.286	6.49321	4.18661	90.5327	3.74978			325.286	8.14479	4.85228	47.5777	3.96571
327.716	4.72305	3.32743	5.48716	3.43463			327.716	3.50703	4.0203	105.2	4.94624				325.921	6.46768	4.27697	115.374	4.00075			325.921	7.33411	4.72548	55.6222	4.07219
328.355	5.12124	5.00593	5.86194	3.51678			328.355	3.72939	4.67392	72.3155	4.98479				326.557	6.30536	3.85816	63.1889	4.25348			326.557	7.71585	4.49587	49.3609	4.49405
328.994	4.91641	3.43693	5.84309	3.7984			328.994	3.82626	3.91688	106.769	5.0786				327.192	5.9852	3.53402	54.0465	4.17447			327.192	7.79131	4.32773	43.2593	4.24075
329.632	5.60332	3.5835	5.6441	3.57988			329.632	4.57171	5.25539	103.058	5.23248				327.827	6.16511	4.014	60.8666	4.395			327.827	7.81535	4.1677	43.6098	4.46103
330.271	5.54425	3.79901	5.8251	3.44534			330.271	4.16348	3.41996	88.0871	5.10356				328.463	6.6457	4.45123	60.9654	4.25496			328.463	6.82884	4.45847	40.2665	4.32055
330.91	4.6526	3.47093	5.77816	3.55779			330.91	3.61329	4.30205	85.7315	4.96878				329.098	6.42696	4.69794	58.244	4.19436			329.098	7.97482	4.88559	39.4128	4.11562
331.549	5.33697	3.67478	5.83617	3.58864			331.549	3.35282	4.91723	78.4081	5.08609				329.733	6.26497	3.52038	65.739	4.05323			329.733	6.40487	3.96166	43.8956	4.0397
332.188	4.86683	3.46538	5.87476	3.37882			332.188	3.92121	4.51811	86.7589	5.14623				330.368	6.00662	3.51759	57.7035	4.39298			330.368	7.23084	3.86835	51.5747	4.23238
332.827	4.82481	4.28331	5.6647	3.43193			332.827	4.05791	3.76482	77.9022	4.94405				331.004	6.8703	3.96115	59.5709	4.18467			331.004	6.57026	6.30596	57.6603	4.01434
333.465	5.5338	3.53321	5.81974	3.62696			333.465	4.03907	3.98804	67.5793	5.26177				331.639	6.85283	3.61884	29.7375	4.21674			331.639	8.32863	3.77076	66.4114	4.12148
334.104	4.84934	3.43191	5.73814	3.92169			334.104	4.01618	3.95333	62.1281	5.29645				332.274	6.49931	3.93167	47.0326	4.04649			332.274	7.77205	4.41697	59.0832	4.13337
334.743	4.93458	4.1887	5.70568	4.03547			334.743	3.35689	4.71105	67.3587	5.33551				332.91	6.86028	4.11479	42.6589	4.15568			332.91	7.6406	4.38191	63.3523	4.19059
335.382	5.43059	3.5993	5.66542	3.90622			335.382	3.53495	3.7633	76.3383	5.36143				333.545	7.13313	3.9776	43.0199	4.17627			333.545	7.59833	4.2519	59.8668	3.96174
336.021	5.08166	3.73174	5.72775	3.99486			336.021	3.50385	4.73176	80.6017	5.31457				334.18	7.09091	4.2619	47.0781	4.24173			334.18	7.4292	4.94915	96.9845	4.09619
336.659	5.05021	3.44312	5.63315	3.98636			336.659	3.57961	4.04363	85.9135	4.97918				334.816	6.86296	4.17271	28.8629	4.03187			334.816	6.78168	3.69922	91.6947	3.99409
337.298	4.6825	4.63817	5.88633	3.92551			337.298	3.52586	4.96005	80.708	5.26456				335.451	6.8244	3.94017	34.3555	4.03742			335.451	6.4752	4.44673	102.48	4.09057
337.937	5.08239	5.19933	5.88101	3.78132			337.937	3.97129	4.38461	91.9575	4.90168				336.086	6.70037	3.9697	31.653	4.29136			336.086	7.43997	3.97628	65.4707	4.27262
338.576	5.33525	4.44581	5.73123	3.57068			338.576	3.41726	4.6245	76.9486	4.96391				336.722	6.53993	3.86279	34.6965	4.2444			336.722	6.64699	4.82978	68.6768	4.02681
339.215	4.93429	5.41918	5.72381	3.54245			339.215	3.38127	5.17478	79.5273	5.06939				337.357	6.41556	4.02227	39.9145	4.14952			337.357	6.28306	3.674	67.4411	4.03074
339.854	5.40026	5.09403	5.92313	3.3051			339.854	4.94399	4.61195	85.3101	4.96346				337.992	6.56717	3.84332	61.1551	4.21539			337.992	6.9328	4.21184	100.708	3.99401
340.492	5.12441	5.0183	5.90277	3.17114			340.492	3.37775	4.3598	90.7271	4.85396				338.628	6.73205	3.71401	69.9921	4.32155			338.628	6.80596	3.94351	119.365	4.27525
341.131	5.53029	4.69248	5.62336	3.51606			341.131	4.27064	4.4159	89.2896	5.17812				339.263	6.10704	4.87343	78.476	4.28437			339.263	6.9141	4.10274	115.203	3.92226
341.77	5.05583	4.99702	5.79143	3.56334			341.77	3.73089	4.18709	95.9866	4.83758				339.898	6.84957	3.43222	93.0299	4.18424			339.898	6.99846	3.78227	92.5546	3.96724
342.409	5.85697	4.60495	5.58129	3.59672			342.409	3.42231	4.37292	106.142	4.94549				340.534	7.39083	3.46788	92.1478	4.40644			340.534	6.3351	4.35729	97.9764	4.33028
343.048	4.81161	4.30101	5.8899	3.71555			343.048	4.08812	4.77742	102.087	5.01788				341.169	7.28738	3.77072	87.0806	4.19051			341.169	7.0432	4.24322	95.6718	3.937
343.687	5.24411	4.0378	5.94274	3.50157			343.687	3.93966	4.51005	91.6683	4.83574				341.804	6.11373	4.67161	100.864	4.18686			341.804	6.59612	5.09243	92.8457	4.16235
344.325	5.15519	3.55855	5.72107	3.62415			344.325	3.62317	4.46929	91.6359	4.78033				342.44	6.23586	4.05371	92.0441	4.39663			342.44	6.93364	5.6213	66.6355	4.10926
344.964	5.03775	3.76864	5.59573	3.29315			344.964	3.84505	4.37404	91.6166	4.60177				343.075	6.8469	5.55634	85.8062	4.1733			343.075	7.50862	4.08384	95.7816	4.18698
345.603	4.97976	3.68915	5.72587	3.39798			345.603	4.22183	4.79523	80.8183	4.73108				343.71	7.22491	3.60159	89.8121	4.25032			343.71	7.25382	4.14806	67.564	3.97923
346.242	5.24073	3.23222	5.94752	3.62808			346.242	4.82771	4.5621	69.2407	4.68235				344.346	7.24105	3.8578	90.5078	4.0667			344.346	7.20639	4.62872	63.9088	4.13754
346.881	5.00692	3.64061	5.79407	3.54686			346.881	4.28085	4.10722	72.9346	4.87095				344.981	6.97682	3.73782	85.5676	4.16235			344.981	6.84304	4.36774	67.3405	3.99495
347.519	4.65501	3.58868	5.74923	3.51649			347.519	4.43069	4.13359	76.6203	5.07221				345.616	7.57629	3.70511	88.4101	3.97092			345.616	6.68475	3.94375	66.4318	3.87645
348.158	5.12108	3.60289	5.78686	3.63899			348.158	3.56181	4.17389	73.266	4.98914				346.252	6.9269	5.56881	93.7208	4.09931			346.252	6.74602	3.77313	100.604	4.09682
348.797	5.02611	3.74593	5.75823	3.59499			348.797	3.62039	4.41271	78.1051	4.8402				346.887	7.66341	9.64864	86.3431	4.29881			346.887	7.267	3.89068	96.8798	3.96117
349.436	5.15088	3.73571	5.77402	3.59693			349.436	4.55953	4.21322	72.1298	4.92201				347.522	8.21646	6.23299	102.328	4.06544			347.522	6.82099	4.04474	90.5516	4.1447
350.075	5.63533	3.75825	5.75847	3.28253			350.075	4.57373	4.69526	81.8313	4.59469				348.158	7.30261	5.66808	102.916	4.24788			348.158	6.41724	3.80661	63.3806	3.98128
350.714	5.43871	4.53789	5.86573	3.27197			350.714	3.77372	4.39794	82.3804	4.63324				348.793	7.55204	7.32137	100.761	4.07249			348.793	5.29578	3.78616	133.676	3.92357
351.352	5.08819	3.64392	5.98133	3.44946			351.352	3.65053	4.31057	95.0195	4.75173				349.428	7.44005	6.23153	97.7498	4.17003			349.428	6.18193	3.55584	105.561	4.06897
351.991	5.41101	5.64154	6.12436	3.16678			351.991	3.72315	4.72562	95.4379	4.75154				350.064	8.03244	6.83034	98.0687	4.23052			350.064	6.57188	3.97668	113.715	4.07485
352.63	5.1208	4.7097	5.97082	3.01877			352.63	4.59186	4.93573	55.4538	4.3827				350.699	7.26159	6.12291	92.4676	4.11539			350.699	7.21268	3.9593	96.925	3.89538
353.269	5.01446	5.0337	5.79337	3.42671			353.269	4.11068	3.82343	59.7368	4.36735				351.334	6.99737	5.49043	100.901	4.07281			351.334	7.38704	4.88917	90.3986	4.12567
353.908	5.60478	5.54363	5.94194	3.25553			353.908	3.99212	3.36274	55.8982	4.40125				351.97	6.77888	4.71998	98.4409	4.33556			351.97	7.3096	4.6315	93.4864	4.14321
354.546	4.7695	5.67233	5.92855	3.23318			354.546	4.00686	4.62373	44.5883	4.35018				352.605	6.69554	3.96124	105.579	4.18835			352.605	6.06484	4.50967	54.2106	4.05415
355.185	5.66786	4.94527	5.95849	3.56993			355.185	3.36376	4.42918	47.8906	4.60909				353.24	7.60659	3.78253	76.0713	4.11095			353.24	6.40999	3.84895	49.6234	3.95919
355.824	5.16679	5.17481	5.67778	3.18624			355.824	3.46475	4.00552	47.9492	4.48138				353.875	6.68643	4.35196	66.7259	4.04567			353.875	7.49034	4.385	37.4697	4.1068
356.463	5.52866	5.50034	5.79511	3.29884			356.463	4.07309	3.54033	63.0331	4.77584				354.511	6.64812	4.38813	97.181	4.17688			354.511	6.82822	4.60735	89.8177	4.22222
357.102	4.83468	4.47993	5.68329	3.18264			357.102	3.536	4.68572	53.2821	4.61891				355.146	6.47331	4.04246	89.5512	4.19625			355.146	7.09308	3.95434	61.0314	4.24224
357.741	5.63899	4.50901	5.73525	3.34627			357.741	5.13956	3.3911	54.151	4.65001				355.781	6.29727	3.60793	95.0352	4.31112			355.781	6.83847	5.28944	93.6907	4.21388
358.379	5.52068	5.14006	5.58559	3.42958			358.379	4.67036	4.02103	56.4323	4.61164				356.417	6.14579	3.6973	58.6737	4.34594			356.417	7.50784	3.937	91.9454	4.37798
359.018	4.89705	5.01858	5.66415	3.53607			359.018	3.91529	4.12856	53.8518	4.80671				357.052	6.00075	3.63199	93.2079	4.31224			357.052	6.76332	3.81935	94.8325	4.55283
359.657	5.11335	4.51093	5.95696	3.78911			359.657	4.746	3.82146	58.9073	4.77141				357.687	6.87193	4.61714	89.2746	4.44615			357.687	7.53286	4.36674	50.0426	4.62942
360.296	5.35379	4.96408	5.85575	3.52169			360.296	3.88665	4.19822	55.8696	4.7773				358.323	5.41749	3.43924	62.8532	4.27124			358.323	6.64975	4.32254	83.3298	4.35732
360.935	5.08319	5.20507	5.9275	3.68488			360.935	3.76093	3.82212	54.7399	4.82492				358.958	5.74121	3.7	67.3966	4.36206			358.958	6.879	4.0381	87.9454	4.21707
361.574	4.85735	3.82583	5.93196	3.6421			361.574	4.40083	4.07871	54.3362	4.8168				359.593	6.64883	4.68818	65.1491	4.22277			359.593	7.29316	4.02336	89.1079	4.60466
362.212	4.87299	4.87003	5.71982	3.63617			362.212	4.87018	4.12739	48.2129	4.92971				360.229	6.17742	3.77736	47.3524	4.27632			360.229	7.45503	4.06065	87.1886	4.37788
362.851	4.83814	4.47246	5.64055	3.53046			362.851	3.28291	3.83326	50.7114	4.80545				360.864	6.23703	4.10389	44.8089	4.15129			360.864	7.72747	4.0243	63.2551	4.44777
363.49	4.90115	5.22725	5.8933	4.06639			363.49	5.2396	3.64395	47.4756	4.78868				361.499	6.3423	4.3578	52.9484	4.31335			361.499	7.87187	4.88674	92.5228	4.05406
364.129	4.61069	5.24455	5.78296	3.6783			364.129	3.88714	4.56724	48.3321	5.04306				362.135	6.60418	4.14961	70.4223	4.34426			362.135	7.98772	4.48559	77.6491	4.30516
364.768	5.65734	5.50183	5.91198	3.90563			364.768	3.89704	3.92004	48.5034	5.12309				362.77	6.67504	4.1546	81.066	4.45535			362.77	7.56834	4.28276	70.5292	4.49647
365.406	5.20274	4.93123	5.92881	4.00617			365.406	3.89284	4.80497	49.8076	4.84722				363.405	6.43085	4.44454	79.7189	4.80366			363.405	7.19415	4.7577	63.2575	4.58706
366.045	5.33373	5.46001	5.79252	3.93315			366.045	4.18521	4.22515	46.868	4.92286				364.041	7.29457	3.99611	80.237	4.41926			364.041	7.73845	3.93738	60.9507	4.44792
366.684	5.24336	5.36189	5.60967	3.95602			366.684	3.68251	3.77894	47.3227	5.32669				364.676	7.00363	4.18907	75.7199	4.54792			364.676	7.71264	4.73482	50.2326	4.45186
367.323	5.01153	5.33499	5.92345	3.96045			367.323	4.23015	4.30192	45.7922	5.11399				365.311	6.69495	3.93889	72.6121	4.392			365.311	7.96684	4.91409	66.1252	4.48056
367.962	5.50699	4.43143	5.75971	3.6123			367.962	3.84517	4.43038	46.6232	5.16653				365.947	6.84023	3.76231	74.1795	4.56251			365.947	8.12978	4.73844	71.6522	4.06741
368.601	5.02833	4.33903	5.86861	3.48918			368.601	3.44364	4.81284	47.4297	5.12296				366.582	6.30563	4.08033	60.7898	4.0927			366.582	8.19828	3.77381	86.7201	3.95567
369.239	4.74878	4.54028	5.98322	3.61308			369.239	4.19686	4.37854	46.4438	4.96007				367.217	6.28182	3.63623	60.4674	4.35247			367.217	8.46477	4.61854	117.612	4.08669
369.878	4.97015	4.91302	5.67313	3.39664			369.878	3.73465	4.36503	44.8918	5.08546				367.853	6.85818	4.05951	61.0753	4.34175			367.853	7.99492	3.76156	125.033	3.90015
370.517	5.50655	4.14858	5.78932	3.29041			370.517	4.56668	4.23676	45.4386	5.06211				368.488	6.68744	3.91232	64.9672	4.49317			368.488	6.61511	4.22314	111.858	3.9873
371.156	4.68661	3.43457	5.64807	3.31587			371.156	3.9074	4.11518	47.4962	5.05414				369.123	7.09415	3.91387	57.8348	4.6156			369.123	7.57991	3.71369	119.206	3.93865
371.795	5.60973	3.48603	5.83277	3.35736			371.795	3.42521	4.20991	48.7736	4.91834				369.759	6.31373	3.99997	53.8868	4.34361			369.759	6.89641	3.88192	100.495	4.18354
372.434	5.17877	4.00856	5.9719	3.32746			372.434	3.78237	4.01171	49.2522	5.0188				370.394	7.46261	4.26957	62.2611	4.23737			370.394	7.44749	3.97113	123.341	4.02794
373.072	5.10583	4.9715	5.76584	3.38139			373.072	4.05993	4.22004	53.3451	5.0514				371.029	6.58562	4.4085	59.2238	4.66525			371.029	8.20732	4.0505	117.393	4.13504
373.711	5.02602	5.54185	5.8045	3.17411			373.711	3.7232	3.87295	52.8871	4.6575				371.665	6.75149	3.94181	47.0854	4.24574			371.665	8.05989	4.2188	126.528	3.93695
374.35	4.66364	3.65082	5.92739	3.5884			374.35	5.18618	4.07518	50.7441	4.69284				372.3	5.91972	3.70697	57.9317	4.60973			372.3	7.32027	4.27022	98.6371	3.83895
374.989	4.9995	3.89747	5.77121	3.32612			374.989	4.51798	3.91199	61.7588	4.87233				372.935	7.00612	4.57829	49.5016	4.85377			372.935	6.31847	5.08879	78.5681	4.04493
375.628	4.75269	4.04854	5.66685	3.8535			375.628	3.86546	3.92114	66.319	4.79869				373.571	6.95635	4.13901	70.7869	4.77571			373.571	6.51462	4.13667	67.5031	4.11656
376.266	5.06293	3.88397	5.95827	3.73798			376.266	3.95019	4.47478	60.4703	4.74768				374.206	5.94386	3.97484	71.9135	4.59603			374.206	6.945	4.36144	94.1077	4.09466
376.905	5.3698	3.45679	5.63165	3.31622			376.905	3.83265	4.04066	62.7301	4.55715				374.841	7.17693	4.40177	59.5205	4.36501			374.841	7.20455	4.37584	72.2714	4.1099
377.544	4.92137	4.89733	5.6996	3.2713			377.544	3.81292	4.34366	100.215	4.78717				375.476	6.22141	4.96143	59.6107	4.55758			375.476	6.43415	4.34243	70.1988	3.59847
378.183	5.17539	3.76528	5.85581	3.23322			378.183	3.70098	3.98038	97.3652	4.77496				376.112	6.34597	4.77043	63.0167	4.3502			376.112	6.66503	3.99292	72.2621	3.86595
378.822	5.0652	3.47247	5.88598	3.48339			378.822	4.69403	4.56936	101.327	4.87416				376.747	7.27949	4.44773	65.2348	4.50881			376.747	6.60605	4.76279	79.6325	3.8906
379.461	5.65464	3.65992	5.8568	3.60716			379.461	4.02949	4.72306	72.2747	4.95021				377.382	6.87395	4.35717	63.5521	4.34075			377.382	6.69477	4.46771	77.9836	3.70802
380.099	4.7527	3.4343	5.84005	3.46815			380.099	4.48013	4.16974	127.558	4.81025				378.018	7.56645	4.45764	62.7082	4.56143			378.018	7.28271	3.96712	97.0169	3.86238
380.738	6.07218	3.80161	5.77616	3.61718			380.738	3.43103	4.49889	92.1786	5.0422				378.653	6.3223	3.96062	60.4972	4.73287			378.653	7.08089	3.99249	97.317	4.1379
381.377	5.52832	3.84228	5.92551	3.43701			381.377	3.87539	4.14728	81.742	4.75844				379.288	6.50745	3.82829	52.9199	4.4142			379.288	7.74402	5.85904	52.4305	4.03727
382.016	4.99707	3.30626	5.74837	3.18549			382.016	3.71759	4.62368	94.4971	4.75235				379.924	6.88293	3.83621	38.71	4.58921			379.924	8.55049	5.74493	73.0634	4.03652
382.655	4.67861	3.55588	5.92615	3.28817			382.655	4.47319	3.93768	79.6366	4.71191				380.559	6.78636	4.61414	44.7606	4.41154			380.559	8.80855	6.26549	66.7393	3.83189
383.294	5.62401	3.36415	6.05961	3.21716			383.294	4.15604	4.73171	89.6597	4.52831				381.194	6.61266	4.13482	46.4074	4.53585			381.194	9.23157	5.58596	89.1576	3.75113
383.932	5.21086	4.23392	5.69986	3.22678			383.932	3.73105	4.51057	81.9836	4.64663				381.83	6.6183	4.06991	45.0495	4.81187			381.83	9.53729	7.08545	55.2615	3.99139
384.571	5.08426	3.54132	6.0531	3.14905			384.571	3.72928	4.44067	82.2549	4.77852				382.465	7.00117	4.30137	45.1456	4.48584			382.465	8.71086	5.73317	54.4282	3.93532
385.21	4.72963	3.59875	5.61129	3.04171			385.21	4.40256	4.66348	80.5818	4.87171				383.1	6.47664	4.0857	44.1788	4.55487			383.1	8.5713	5.67824	100.07	3.90476
385.849	5.5787	3.82422	5.87222	3.17142			385.849	4.69992	3.38967	83.2253	4.95191				383.736	6.49333	4.2557	44.172	4.67423			383.736	8.13763	5.34451	63.5701	3.76881
386.488	4.57349	3.47555	5.8684	3.24235			386.488	3.64758	4.96452	87.3899	4.96514				384.371	6.65223	3.61166	45.41	4.40417			384.371	8.37735	5.39385	66.2508	3.83615
387.126	5.47783	3.66387	5.87653	3.03471			387.126	3.43795	4.17727	104.367	4.86499				385.006	7.10642	4.27118	45.475	4.59574			385.006	8.71146	5.6041	44.4921	4.23145
387.765	4.64658	3.94531	5.75191	3.10141			387.765	3.89957	4.56189	92.3072	4.82286				385.642	6.56018	4.15766	44.6647	4.63229			385.642	8.28463	5.72267	99.2088	3.93879
388.404	4.57248	3.68413	5.95925	3.10545			388.404	3.76193	4.1579	81.8687	4.67551				386.277	6.20179	4.39953	44.765	4.55437			386.277	6.95955	5.04436	68.517	3.97547
389.043	4.86401	4.85189	5.75701	3.20793			389.043	3.85469	4.20504	118.18	4.76894				386.912	5.67532	3.94136	49.3884	4.56661			386.912	8.68145	5.65763	75.9018	3.85709
389.682	5.47743	3.64472	5.59909	3.28656			389.682	3.95001	4.13543	117.161	4.84763				387.548	6.04355	4.05563	48.4066	4.69162			387.548	8.84549	6.77466	89.3989	4.01051
390.321	5.23352	3.82872	6.0202	3.36773			390.321	3.7878	4.62888	119.549	4.89857				388.183	7.14764	3.32162	50.4895	4.66392			388.183	8.46258	6.36932	89.0711	4.36927
390.959	5.10764	4.38457	5.77521	3.16584			390.959	4.04501	4.0894	87.2023	4.73756				388.818	6.75573	4.2563	62.7044	4.5467			388.818	7.68541	5.72031	85.3192	4.0676
391.598	4.8867	3.66039	5.80099	3.1788			391.598	3.72316	4.38705	97.5801	4.80581				389.454	6.41954	4.27204	59.8776	4.30907			389.454	8.5153	5.34637	82.553	4.17355
392.237	5.12875	5.05663	5.66213	3.37832			392.237	3.613	4.30379	99.4149	4.86391				390.089	6.97065	3.84784	52.84	4.24711			390.089	8.1105	6.29512	85.8311	3.99468
392.876	5.10314	3.85668	6.09766	3.41204			392.876	4.18722	4.44667	95.2834	4.73284				390.724	7.03489	3.76147	51.7221	4.28265			390.724	7.4124	5.47406	86.6538	3.97453
393.515	5.64128	3.82374	5.61631	3.26632			393.515	3.57349	4.44084	87.9757	4.69054				391.36	7.0665	3.78554	45.6882	4.22969			391.36	7.82854	5.34675	92.0723	3.91156
394.153	5.52455	3.52766	5.69848	3.35741			394.153	4.15013	3.9666	124.388	4.88959				391.995	6.36319	4.18373	57.3243	4.46276			391.995	8.43229	5.31757	98.5094	3.82668
394.792	5.09654	3.74093	5.73679	3.25308			394.792	3.69069	4.73503	116.407	4.96447				392.63	6.8563	3.74541	61.5712	4.52162			392.63	8.08251	5.25673	127.78	3.9364
395.431	4.54608	3.54469	5.59112	3.27611			395.431	3.62458	4.3697	111.012	4.71143				393.266	6.45878	3.96992	67.1005	4.45964			393.266	8.20465	4.47641	131.308	4.26722
396.07	5.00146	4.57341	5.53757	3.30803			396.07	3.68577	4.84303	107.777	4.58787				393.901	6.36696	4.32193	64.5556	4.60642			393.901	7.21924	5.3095	107.165	4.52227
396.709	4.8082	3.96506	5.65503	3.47078			396.709	4.00747	4.35782	115.394	4.34767				394.536	6.24569	4.20604	89.2092	4.42229			394.536	7.81157	5.47347	127.693	4.50034
397.348	5.4794	4.0164	5.62167	3.40479			397.348	3.86323	4.43296	106.755	4.74299				395.172	7.1046	4.17312	60.357	4.2933			395.172	8.04093	5.85484	79.6038	4.25912
397.986	5.32897	3.91015	5.73052	3.31673			397.986	3.9729	4.76972	124.345	4.83215				395.807	7.23049	3.80773	52.486	4.39917			395.807	7.95147	4.64794	74.187	4.17574
398.625	5.13086	4.23963	5.83581	3.46148			398.625	4.38803	4.55334	94.8517	4.75008				396.442	6.12064	3.86299	51.1669	4.37371			396.442	7.62115	4.65024	70.0954	4.06842
399.264	5.07594	4.10002	5.75756	3.4984			399.264	4.2262	3.91239	81.6422	4.87637				397.078	6.62753	4.64847	41.2471	4.55499			397.078	6.35903	4.26434	87.8625	3.99244
399.903	4.9677	3.87974	5.47494	3.43896			399.903	4.10463	4.06791	78.8374	4.98118				397.713	6.19131	4.54645	39.8936	4.48051			397.713	7.70175	4.11193	85.7008	4.25188
400.542	4.86172	3.62411	5.94741	3.43618			400.542	4.0069	4.79635	78.8311	4.88504				398.348	6.71901	3.92475	50.5113	4.40002			398.348	6.62634	3.97096	95.8008	4.21765
401.181	5.05415	3.65366	5.7351	3.39204			401.181	3.36604	4.48963	76.594	4.84683				398.983	6.35207	4.83327	34.4734	4.50554			398.983	8.37359	5.27917	133.391	4.25067
401.819	4.57593	3.54303	5.71292	3.46382			401.819	3.55189	5.08886	72.7093	5.15658				399.619	6.56125	4.09542	42.5555	4.46958			399.619	8.84967	4.69513	123.418	4.37559
402.458	5.34662	3.86558	5.77486	3.29525			402.458	3.38404	4.60657	66.1221	4.94232				400.254	7.86106	4.15557	40.9301	4.64047			400.254	8.63429	6.19376	108.862	4.72716
403.097	4.67698	4.99568	5.73653	3.3309			403.097	3.74024	5.04423	71.421	4.74984				400.889	6.66794	4.30494	58.6764	4.43259			400.889	10.4998	5.40811	79.2962	4.46397
403.736	4.77157	4.31723	5.87739	3.28807			403.736	3.93796	4.46141	58.9806	4.59768				401.525	6.91882	3.66385	56.5432	4.51546			401.525	9.78997	5.94962	122.001	4.25391
404.375	4.80667	3.99457	5.73594	3.16352			404.375	3.73756	4.14633	67.5937	4.47053				402.16	6.9666	4.68707	42.1693	4.80882			402.16	9.21838	6.15955	102.884	4.2763
405.013	4.77291	3.89631	5.58896	3.31121			405.013	3.93122	4.04527	61.6493	4.80277				402.795	7.1784	4.44759	31.9394	4.7657			402.795	8.57267	5.8888	88.5436	4.12944
405.652	4.90877	3.97637	5.79591	3.48012			405.652	3.40379	4.58297	96.2403	4.7865				403.431	6.75706	5.76443	27.5257	4.60119			403.431	8.59472	5.29687	92.304	3.81323
406.291	4.97272	4.35499	5.76815	3.37289			406.291	3.76324	4.96674	83.0767	4.92046				404.066	6.61175	4.93791	30.7378	4.9359			404.066	8.53769	5.45528	98.572	3.84615
406.93	4.85563	3.65426	5.85886	3.21126			406.93	4.28859	4.27343	92.9263	4.81516				404.701	7.1741	5.20687	30.006	4.76512			404.701	9.29238	6.28416	97.4325	3.99987
407.569	5.07134	3.269	5.80045	3.34855			407.569	4.49341	4.47703	83.3685	5.06667				405.337	6.53293	5.01781	24.763	4.71066			405.337	9.003	6.19688	84.1768	3.93467
408.208	5.7456	3.75821	6.11846	3.06593			408.208	3.6448	5.3443	83.2983	4.9103				405.972	6.95019	4.23044	28.3491	4.59676			405.972	8.80651	5.5575	60.6818	4.00149
408.846	4.97762	4.07942	6.22673	3.08992			408.846	4.52223	4.86845	76.9068	5.02743				406.607	6.42881	4.84889	31.7131	4.7696			406.607	9.62023	6.85455	56.5938	4.17717
409.485	4.96682	6.23353	5.98555	3.05622			409.485	3.87882	4.39552	67.9784	4.73537				407.243	7.06693	4.44639	41.4042	4.50243			407.243	8.04182	6.31665	53.2092	4.13743
410.124	5.07631	3.74431	5.80192	3.19665			410.124	5.1769	4.49414	64.1132	4.91687				407.878	6.38171	5.0424	44.5384	4.30348			407.878	8.74497	6.12816	48.3093	4.29818
410.763	4.60612	4.01501	5.78853	2.98498			410.763	4.94778	4.82836	68.4498	4.91532				408.513	5.86181	5.1528	46.7146	4.50129			408.513	8.16196	6.18368	36.2287	3.975
411.402	4.91751	4.21953	5.8815	3.32201			411.402	5.77771	4.06833	69.5935	4.82174				409.149	6.91903	4.90653	42.1631	4.30365			409.149	8.21974	5.73045	42.3327	4.09046
412.041	4.79354	4.3065	6.00345	3.3638			412.041	4.94707	3.86831	70.0048	5.03936				409.784	6.1869	5.20668	45.2139	4.4235			409.784	8.63704	5.65145	46.3542	4.1189
412.679	4.8429	3.62238	5.78181	3.46854			412.679	3.61512	4.41268	67.8498	5.20863				410.419	6.60401	4.02054	56.7799	4.37571			410.419	8.06321	5.59485	51.8122	3.80802
413.318	4.93083	3.74501	5.9424	3.42485			413.318	4.73091	3.73661	69.117	5.06362				411.055	6.65221	4.37187	47.2276	4.1475			411.055	8.35195	4.69986	43.7116	4.25698
413.957	4.62848	4.81695	5.98338	3.40753			413.957	4.75044	4.66998	73.6095	5.07662				411.69	6.82089	5.04527	46.6232	4.41498			411.69	5.48798	4.88529	56.8837	4.24022
414.596	4.83378	4.03318	5.86957	3.41505			414.596	4.98683	3.6699	73.7861	4.6843				412.325	6.80952	4.28364	40.8455	4.37347			412.325	4.76391	4.9581	68.3703	4.16024
415.235	4.45808	3.63432	5.9975	3.54309			415.235	4.45279	4.37261	73.7363	4.79891				412.961	6.2938	4.6945	48.8628	4.42498			412.961	5.42974	5.17221	76.1436	4.0136
415.873	4.61881	4.19962	5.89752	3.77999			415.873	4.07126	5.11028	76.1662	4.95105				413.596	7.17883	4.29785	43.7016	4.72447			413.596	5.78722	5.5399	75.8642	3.80683
416.512	5.09878	4.16629	5.98769	3.45183			416.512	3.9	5.06921	73.6982	4.69276				414.231	6.49402	3.88294	44.6578	4.37985			414.231	4.7397	3.86147	75.638	3.94187
417.151	5.60501	5.60639	5.80473	3.55909			417.151	3.82152	3.64495	75.164	4.83143				414.867	6.80385	4.58414	57.9462	4.38058			414.867	5.29123	4.37001	87.6729	4.10838
417.79	4.78129	4.12577	5.99709	3.48325			417.79	4.34966	4.26218	73.2362	5.12324				415.502	6.92286	4.10796	56.4435	4.35934			415.502	4.82048	5.76629	66.0453	3.92786
418.429	4.57534	3.80291	5.62185	3.37878			418.429	3.88298	4.80938	69.0843	5.00142				416.137	6.40449	4.05308	52.746	4.44286			416.137	5.18598	4.38269	54.9994	4.02385
419.068	4.55646	3.70381	6.01917	3.47278			419.068	5.26655	4.44318	73.512	4.90744				416.773	6.88874	3.56509	41.8008	4.34569			416.773	4.53947	4.21812	47.3624	4.20143
419.706	4.86955	4.41607	5.82236	3.42528			419.706	4.57488	4.29649	72.7688	5.00294				417.408	6.46105	4.54851	37.2012	4.51326			417.408	4.71552	5.75419	41.7659	4.15062
420.345	4.93257	4.26512	5.7648	3.63472			420.345	3.82254	4.59854	75.4735	4.99198				418.043	6.48693	3.93902	38.3734	4.45883			418.043	4.76736	4.7534	48.2	4.11887
420.984	4.33973	4.08355	5.87099	3.46349			420.984	4.26239	5.10756	71.973	5.10944				418.679	6.2293	4.45894	44.7593	4.64268			418.679	5.27052	4.02769	52.1731	4.1197
421.623	4.81022	3.46364	5.80111	3.46465			421.623	3.7721	4.92738	65.267	5.07524				419.314	6.42033	4.17445	50.3355	4.44925			419.314	4.52176	5.09225	58.4534	3.85926
422.262	5.41735	5.02581	5.85315	3.88809			422.262	3.8416	4.6435	64.3616	5.18294				419.949	6.77255	3.82503	47.965	4.7059			419.949	4.81658	3.76365	65.9635	4.07958
422.901	5.17314	3.84619	5.63867	3.37213			422.901	3.77707	4.40057	82.2773	4.81267				420.584	6.73895	3.9453	75.762	4.69533			420.584	4.86363	4.61935	64.8186	4.15786
423.539	5.5393	4.98116	5.78075	3.26877			423.539	3.89255	5.01923	90.9019	5.137				421.22	7.17066	4.34035	109.182	4.92553			421.22	5.16269	3.86064	64.9352	3.78987
424.178	4.57994	3.71639	6.01195	3.44337			424.178	3.42716	4.70914	89.2579	5.04718				421.855	6.52865	4.26608	113.549	4.6193			421.855	4.26389	4.88222	45.8791	4.24502
424.817	5.44088	4.16677	6.19867	3.1135			424.817	3.58581	4.32947	82.0793	5.06698				422.49	6.44308	4.41876	112.512	4.80995			422.49	5.69342	5.51488	49.7777	4.15056
425.456	4.76976	4.50875	5.71497	3.19664			425.456	3.68351	4.37007	76.2827	4.83604				423.126	6.90665	4.03192	88.7286	4.91626			423.126	4.67795	5.73359	54.7371	4.28924
426.095	4.76374	3.81889	5.7932	3.39413			426.095	3.3886	5.15426	74.0935	5.21348				423.761	7.99597	4.37724	118.02	4.51604			423.761	4.73012	5.70007	50.4234	4.09078
426.733	5.09025	5.67542	5.75273	3.18973			426.733	3.69709	5.23434	75.6738	4.72433				424.396	6.69785	4.25868	80.9437	4.56979			424.396	5.04877	4.89537	43.4904	3.82556
427.372	5.61885	3.99678	5.85305	3.54322			427.372	3.80502	4.07421	75.028	4.88				425.032	6.62314	4.7764	70.613	4.87612			425.032	4.93258	6.0415	55.2261	3.91045
428.011	5.42463	4.19483	5.8724	3.48435			428.011	3.79885	4.55427	73.6423	4.80686				425.667	6.6257	4.05181	73.1645	4.56263			425.667	4.86917	5.24293	53.6198	4.06395
428.65	4.96074	3.54163	5.89938	3.50637			428.65	3.42384	4.64489	72.815	4.48118				426.302	7.34244	4.35083	84.2449	4.46431			426.302	4.94119	4.87636	57.1969	4.17519
429.289	5.01094	4.26656	5.84867	3.19578			429.289	3.84824	4.51665	72.7443	4.56043				426.938	7.08853	4.82441	119.51	4.63849			426.938	4.52958	4.01085	52.7227	3.82717
429.928	4.93519	3.97965	5.7086	3.22103			429.928	4.66185	4.0889	73.6464	4.75501				427.573	6.43714	4.3949	115.766	4.87086			427.573	5.42883	4.78882	66.5554	4.07474
430.566	5.16059	3.41763	5.99843	3.09144			430.566	3.92868	3.7894	69.9109	4.5446				428.208	6.40574	5.0768	114.717	4.44609			428.208	5.14556	3.88506	59.6412	3.94595
431.205	5.24087	5.53585	5.7605	3.01865			431.205	3.3885	4.60246	71.379	4.77872				428.844	7.47868	4.75897	118.23	4.59758			428.844	4.5931	3.68125	70.6153	3.81225
431.844	5.40054	4.05058	6.05138	3.21386			431.844	3.59473	3.94813	68.1957	4.67413				429.479	6.76069	4.57959	85.7789	4.74529			429.479	5.01202	3.70989	75.2276	3.81903
432.483	5.4523	4.48224	5.77407	2.96847			432.483	3.73777	4.82597	66.3421	4.57424				430.114	7.53143	5.47043	119.079	4.54412			430.114	5.20377	3.85863	72.6366	3.81347
433.122	4.85975	4.18428	6.18038	3.40175			433.122	3.70552	4.05142	73.2125	5.01829				430.75	7.48357	4.67553	118.102	4.48876			430.75	4.67654	3.96958	64.2019	3.74195
433.76	5.38082	3.91119	5.88152	3.27486			433.76	4.60461	3.38376	74.0859	4.64465				431.385	7.4445	4.99659	107.88	4.77222			431.385	5.02306	3.94307	63.252	4.10496
434.399	5.31928	4.21735	5.79645	3.3563			434.399	4.04448	3.89283	75.9279	4.55168				432.02	6.75006	4.755	98.2183	4.52618			432.02	4.76854	4.42984	91.4756	3.67311
435.038	5.20265	4.58602	5.85168	3.44386			435.038	4.44265	4.02312	64.2848	4.45036				432.656	7.62161	4.48434	95.8762	4.56287			432.656	5.00315	3.77336	59.7774	3.47137
435.677	5.46647	4.14912	5.86397	3.32183			435.677	4.95882	3.92694	66.3161	4.44959				433.291	6.25888	5.05629	107.457	4.56633			433.291	5.09268	3.69838	50.7044	3.59335
436.316	5.05206	3.773	5.7951	3.4109			436.316	3.81156	3.82185	83.2283	4.51778				433.926	6.5633	5.11142	109.808	4.78079			433.926	5.14619	4.14473	67.5607	3.7381
436.955	4.74821	3.58504	5.88637	3.3748			436.955	4.00709	4.61437	80.8723	4.41727				434.562	7.29561	4.22526	95.0064	4.37397			434.562	5.43579	4.71939	91.3751	3.61104
437.593	5.21176	3.55902	5.78785	3.34762			437.593	4.88034	4.03602	97.8754	4.41308				435.197	6.59019	4.72034	93.5684	4.48062			435.197	5.42043	4.8877	85.4555	3.51122
438.232	4.56819	3.89861	5.87094	3.58871			438.232	3.55309	4.32527	95.5086	4.67644				435.832	7.63893	4.3236	64.0165	4.49825			435.832	4.8937	4.62176	89.7853	3.73521
438.871	5.32226	3.80029	5.80278	3.40176			438.871	3.58914	4.95599	92.7345	4.27853				436.468	6.63356	4.29315	69.5536	4.53585			436.468	4.91899	4.33858	89.4318	3.61076
439.51	4.39972	3.65385	5.72731	3.49884			439.51	4.03951	3.77772	92.4124	4.50564				437.103	7.32714	4.98127	101.095	4.29029			437.103	5.37037	4.46308	59.6635	3.73306
440.149	4.40414	3.6925	5.78776	3.61929			440.149	4.38381	4.63951	92.4273	4.47099				437.738	5.79404	4.50907	104.452	4.30244			437.738	4.87878	4.17546	57.5878	3.8371
440.788	5.56422	3.69521	5.90523	3.42089			440.788	4.18486	4.42643	112.763	4.47815				438.374	6.59123	4.43576	101.304	4.29996			438.374	4.63376	4.80991	55.179	3.76572
441.426	4.89276	3.56119	5.77732	3.29167			441.426	3.73289	4.05039	116.448	4.44606				439.009	7.28162	4.85704	57.2992	4.39308			439.009	5.23135	5.37758	90.2538	3.73494
442.065	4.46801	3.62708	6.18131	3.14789			442.065	4.15642	3.54119	118.632	4.3983				439.644	6.78669	4.50212	43.8874	4.49921			439.644	4.95157	4.32583	93.7737	3.79682
442.704	4.79215	4.19567	5.84086	3.27478			442.704	3.50269	3.85124	121.662	4.40924				440.28	7.1684	4.47005	51.4421	4.52861			440.28	5.19318	4.79159	69.5739	3.87611
443.343	5.04863	3.52254	5.79276	3.36551			443.343	3.4284	4.02662	122.065	4.61561				440.915	7.20789	4.01616	51.8459	4.34583			440.915	5.10464	4.35526	71.7465	4.14145
443.982	5.52233	3.87769	5.73999	3.10836			443.982	3.76249	4.71649	105.002	4.46147				441.55	6.36825	4.79114	53.6747	4.66546			441.55	4.72336	4.7664	70.7011	3.90875
444.62	4.79052	3.79386	5.67288	3.06975			444.62	4.0811	4.17491	91.233	4.24039				442.186	6.96578	4.69397	70.0015	4.90393			442.186	5.09871	4.79797	75.2552	3.92376
445.259	5.97354	3.87962	6.01311	3.08698			445.259	3.95038	4.86084	97.2601	4.16902				442.821	6.74665	4.47319	44.778	5.02587			442.821	4.4356	4.05971	71.2495	3.71415
445.898	4.87817	5.01323	5.99131	2.94991			445.898	3.91371	4.8221	109.954	4.43425				443.456	7.28777	4.28376	43.1803	4.64122			443.456	5.5412	4.69893	65.8808	3.56754
446.537	4.91012	3.77941	5.9021	2.98882			446.537	3.73806	4.6959	109.361	4.87296				444.091	8.00063	4.83356	34.5728	5.15783			444.091	4.34615	4.1124	70.5712	3.9697
447.176	4.80781	3.42774	5.81804	3.18118			447.176	3.78139	4.80965	107.975	4.79002				444.727	7.36859	4.14807	43.2291	4.74671			444.727	4.83036	4.15951	65.3612	4.03104
447.815	5.54272	3.81942	5.74231	3.15131			447.815	3.59721	4.43053	107.777	4.69959				445.362	7.9587	5.08031	45.5772	4.68463			445.362	4.94993	4.29815	54.1474	4.0278
448.453	5.53891	3.529	5.79706	3.20655			448.453	3.51196	4.5176	111.039	4.51002				445.997	6.90453	4.9047	59.1892	4.73326			445.997	5.08189	4.49429	50.2768	3.63521
449.092	4.57925	3.53256	5.80948	3.10418			449.092	4.20511	4.84135	94.9614	4.51071				446.633	7.43804	4.46981	59.1086	4.65401			446.633	5.11725	3.94514	51.9794	3.61964
449.731	4.97356	3.89242	5.88794	3.21251			449.731	3.77949	4.4421	99.5059	4.71928				447.268	7.1842	4.52083	58.9711	4.53288			447.268	5.29794	3.64623	53.2719	3.77151
450.37	5.44417	3.77718	5.95135	3.19484			450.37	3.8618	4.20847	105.063	4.43258				447.903	7.08219	3.82715	52.3103	4.93261			447.903	4.95962	3.89725	52.796	3.44982
451.009	4.83697	3.27452	5.76713	3.29032			451.009	3.93434	4.83417	102.653	4.52524				448.539	8.21843	5.50133	50.1475	4.56725			448.539	4.95435	5.93804	57.8178	3.67929
451.648	5.05544	3.58169	5.72078	3.13537			451.648	3.44501	4.35936	62.6099	4.33784				449.174	7.51083	4.41216	44.9249	4.55592			449.174	5.09597	3.97218	66.8746	3.63213
452.286	4.6589	3.41083	5.91241	3.08222			452.286	3.6517	4.44429	103.356	4.63477				449.809	7.57175	4.60195	52.763	4.51002			449.809	4.85155	5.21016	68.7364	3.40996
452.925	5.13926	3.55452	5.72115	3.0892			452.925	4.12991	4.45863	93.2725	4.75137				450.445	8.27838	4.65632	40.5384	4.57622			450.445	5.41188	4.82558	61.0983	3.74751
453.564	4.79932	3.69261	5.71224	3.43055			453.564	3.92408	4.07553	96.852	4.70758				451.08	7.86562	4.5458	36.053	4.68505			451.08	5.1578	4.3682	57.3774	3.87036
454.203	5.14983	3.56132	5.61887	3.22221			454.203	4.24464	4.103	103.365	4.5308				451.715	7.92775	4.22316	33.8864	4.67009			451.715	5.1303	5.20272	51.2692	3.60448
454.842	4.89222	4.0476	6.03224	3.19887			454.842	3.57661	4.60049	61.8235	4.80098				452.351	6.51778	5.04314	31.9232	4.61899			452.351	5.4239	4.54805	51.5615	3.75443
455.48	5.52522	3.99554	5.47189	3.25684			455.48	3.96656	4.89618	62.8932	4.93896				452.986	7.78711	4.25448	45.685	4.72914			452.986	5.31013	5.25214	38.7176	3.68169
456.119	4.29593	3.77445	5.63834	3.38795			456.119	3.76684	4.12697	52.9191	4.94568				453.621	5.19618	4.80842	48.3981	4.4616			453.621	5.04944	5.07505	43.8709	3.95704
456.758	4.62186	3.83714	5.88998	3.49574			456.758	4.10591	4.83061	51.7058	4.66342				454.257	5.57222	4.16901	47.687	4.48153			454.257	5.01247	4.96477	54.1297	3.79484
457.397	5.64323	3.65949	5.96842	3.29978			457.397	3.559	4.49031	50.8623	4.7344				454.892	4.81237	4.66952	46.6525	4.39212			454.892	4.85741	4.74638	61.4051	4.10671
458.036	5.45457	3.65399	5.78642	3.11039			458.036	3.99547	4.96779	54.7584	4.9942				455.527	5.59712	4.54234	44.8656	4.62561			455.527	6.33988	5.31731	91.8275	4.06604
458.675	5.15135	3.81957	5.83525	3.24412			458.675	3.52195	5.2684	50.5265	5.04325				456.163	5.35601	4.57118	64.7703	4.62978			456.163	5.01316	4.21013	76.7645	3.97019
459.313	4.9786	3.57693	5.84672	3.37834			459.313	4.1464	4.21298	51.6235	5.04316				456.798	5.61801	4.3407	67.8967	4.62053			456.798	5.13076	4.52536	72.4325	3.99593
459.952	4.97973	3.95182	5.85803	3.25289			459.952	4.22066	4.41564	49.1589	5.0211				457.433	5.82728	3.9291	63.7751	4.45281			457.433	5.65655	3.86195	74.3459	3.84611
460.591	4.99482	3.67652	6.0523	3.50281			460.591	3.41521	4.05333	47.8122	4.63188				458.069	5.15566	4.06363	97.4747	4.37144			458.069	4.96308	3.72978	73.1205	3.86813
461.23	4.94763	3.80185	5.83298	3.44217			461.23	3.69489	3.84385	56.0163	4.76355				458.704	5.12427	4.41216	77.2168	4.40976			458.704	5.26276	4.04646	71.9485	3.6194
461.869	4.52769	4.05579	5.89709	3.31942			461.869	3.56272	4.1534	93.3	4.59327				459.339	4.98695	4.56008	70.5651	4.49287			459.339	5.0905	3.97813	79.9616	3.78767
462.508	5.11121	3.44906	5.65149	3.26076			462.508	3.4595	4.41746	95.603	4.80228				459.975	7.07716	4.54889	98.5045	4.50378			459.975	4.91881	3.72599	54.1924	4.02998
463.146	4.78015	3.26273	5.88618	3.19532			463.146	3.49758	4.21746	99.8868	5.01128				460.61	7.97091	4.1596	98.7426	4.75791			460.61	4.47944	3.66785	62.4562	3.84756
463.785	4.8215	3.61539	5.90891	3.43942			463.785	3.7435	4.32994	68.0361	5.15399				461.245	8.0874	4.12822	96.8567	4.51695			461.245	4.96325	4.0433	69.2602	3.55578
464.424	5.08291	3.71303	5.90483	3.27345			464.424	3.68492	4.01974	65.538	5.15748				461.881	7.66965	3.98102	89.5844	4.63833			461.881	5.08623	3.72602	63.3691	3.93474
465.063	5.31676	3.82401	5.85216	3.24169			465.063	4.20206	4.18153	54.4848	5.09455				462.516	8.17054	4.32417	83.8147	4.23092			462.516	4.98091	4.72073	70.0627	3.57058
465.702	4.95702	3.70808	5.61163	3.22028			465.702	3.55281	3.88727	99.041	4.85505				463.151	8.43598	5.13526	75.1758	4.63846			463.151	4.81657	4.57926	70.9862	3.52185
466.34	5.35281	3.74955	5.67711	3.17086			466.34	3.77442	4.08253	98.0397	4.87181				463.787	8.66457	4.32228	98.685	4.17865			463.787	5.41047	4.46414	70.2513	3.65051
466.979	4.75893	3.44464	6.0356	3.23832			466.979	3.72406	3.8939	89.3002	4.9661				464.422	8.32303	4.80557	82.3617	4.31699			464.422	5.45101	4.28192	66.6874	3.56284
467.618	4.84726	3.81681	5.70028	3.36638			467.618	5.03135	4.09353	85.224	4.89606				465.057	7.88958	4.15521	84.3731	4.38351			465.057	5.75173	5.05458	72.8328	3.65019
468.257	4.19598	3.63764	5.98116	3.11113			468.257	5.20963	4.18129	58.6684	5.03965				465.693	8.01698	4.7252	88.3874	4.66173			465.693	5.13764	5.38819	62.3448	3.79638
468.896	5.37444	3.56085	5.79764	3.4283			468.896	3.4805	4.29921	58.8695	5.14306				466.328	8.73353	4.29925	103.016	4.58926			466.328	5.34885	4.5896	91.6787	3.48681
469.535	4.94642	3.5022	5.61491	3.50722			469.535	4.72249	4.54823	65.1812	5.27245				466.963	8.94485	5.03799	119.341	4.42253			466.963	5.22637	4.68945	74.864	3.44163
470.173	4.98071	3.68781	5.75825	3.22048			470.173	3.94226	3.95586	56.3927	5.1394				467.598	8.49892	4.44981	91.502	4.48501			467.598	5.42281	4.4548	97.6016	3.73832
470.812	4.92026	3.55133	5.74634	3.32444			470.812	3.53188	4.37931	55.1983	5.13899				468.234	8.33541	5.13518	90.7506	4.6651			468.234	5.29924	4.44785	80.3504	3.66714
471.451	4.74861	4.41834	5.90219	3.281			471.451	4.76888	4.18733	94.993	5.11004				468.869	8.30153	4.4893	100.197	4.58448			468.869	5.25997	4.0574	74.3123	3.42325
472.09	4.80059	3.88016	6.11901	3.32434			472.09	3.82994	3.90038	95.6099	5.09362				469.504	8.26364	4.16252	96.8937	4.54438			469.504	5.58237	3.55951	100.295	3.55566
472.729	4.72952	3.76248	5.91846	3.47361			472.729	5.0077	4.71176	98.064	5.23423				470.14	7.42471	4.85253	95.6966	4.5311			470.14	4.96982	4.44071	87.6972	3.59608
473.367	4.18161	3.66195	5.83864	3.50574			473.367	4.72741	4.14252	55.6785	5.02025				470.775	7.49535	4.73337	85.1153	4.32693			470.775	4.90823	3.74796	106.608	3.87649
474.006	5.52984	3.87396	5.91619	3.59793			474.006	4.71201	4.62826	52.8155	4.75185				471.41	7.11655	3.89292	100.781	4.12086			471.41	5.34276	4.47264	74.4717	3.70891
474.645	5.01613	3.55594	5.67378	3.35163			474.645	3.64367	4.29623	95.1154	4.98122				472.046	7.29467	3.99411	89.4073	4.13984			472.046	5.20172	5.34176	55.2399	3.74548
475.284	5.16168	4.01547	6.18282	2.86309			475.284	4.28078	3.78213	92.9067	4.57569				472.681	7.96562	4.7863	90.7306	4.34463			472.681	4.83916	3.98961	63.6559	3.82163
475.923	5.07553	3.62223	5.92201	3.12968			475.923	4.14727	4.30735	93.5867	4.59779				473.316	7.87934	4.14825	84.0858	4.4264			473.316	5.31906	4.0072	70.5118	3.96398
476.562	5.25641	3.70496	5.84431	3.16345			476.562	4.07217	4.08032	83.6938	4.73761				473.952	9.34511	4.00759	59.2626	4.13749			473.952	4.98427	3.60187	76.9126	3.73196
477.2	4.79303	4.99687	5.53697	3.18155			477.2	5.05572	3.68835	93.523	5.13612				474.587	7.08597	4.45872	65.162	4.05498			474.587	4.80282	4.00381	73.4155	3.62463
477.839	4.72734	4.13735	5.98972	3.46319			477.839	4.76704	4.27482	94.1404	4.79709				475.222	8.42236	5.06759	94.2087	4.34178			475.222	5.22886	4.00821	76.4348	3.66699
478.478	5.35771	5.79384	6.10134	3.63381			478.478	4.82955	4.28292	94.2542	4.91482				475.858	7.26953	4.50702	82.8234	4.36446			475.858	4.86432	4.35548	74.5421	4.00023
479.117	5.40579	3.41251	5.85232	3.44604			479.117	3.54285	3.95453	97.72	4.91879				476.493	8.06973	4.54048	98.1314	4.50754			476.493	5.17351	4.10638	76.3815	3.95546
479.756	4.39628	3.68235	5.90196	3.50419			479.756	3.57919	4.91168	109.073	4.9522				477.128	8.35619	5.02791	84.5141	4.53711			477.128	5.27885	4.31982	82.5601	3.90585
480.395	4.51867	4.12544	5.72099	3.50053			480.395	4.746	4.08484	93.8218	5.01931				477.764	8.57158	5.10494	87.5149	4.35953			477.764	5.40541	3.92795	84.9927	3.75161
481.033	4.69065	4.16187	5.83774	3.58983			481.033	3.98642	3.63652	122.094	4.90167				478.399	7.7944	5.21722	104.148	4.5149			478.399	5.03496	3.93131	87.4971	3.8232
481.672	4.92527	3.41007	5.69276	3.59441			481.672	3.80828	4.34237	97.7001	4.81017				479.034	8.47829	4.37129	97.9404	4.47651			479.034	5.38548	4.23759	85.9745	4.05348
482.311	4.46671	4.32012	5.76607	3.43801			482.311	3.69137	4.87324	95.946	4.70734				479.67	8.12712	4.72928	96.031	4.4717			479.67	5.05273	4.34098	92.0342	3.86963
482.95	5.10833	3.95885	5.89802	3.81526			482.95	3.72418	5.09525	86.6039	4.60952				480.305	8.16645	5.07594	77.1099	4.52178			480.305	4.85563	4.19961	82.831	3.89041
483.589	5.06228	3.85207	5.9004	3.73888			483.589	4.88975	3.94294	116.826	4.71482				480.94	7.34142	5.22342	79.7162	4.2887			480.94	5.2607	4.91616	60.2497	4.07999
484.227	5.18754	3.99786	5.98748	3.68255			484.227	3.82313	4.67909	114.68	4.52186				481.576	6.96534	4.76355	66.9797	4.17889			481.576	5.05253	4.07138	70.5174	3.88455
484.866	4.86087	3.53006	5.89387	3.4806			484.866	4.36603	4.63352	122.884	4.64955				482.211	8.43892	4.3537	74.4839	4.5379			482.211	4.89281	4.7175	69.9486	3.66947
485.505	5.28346	3.51082	6.00707	3.78546			485.505	3.52226	5.03601	97.3534	4.7777				482.846	7.09752	4.4185	67.1662	4.55671			482.846	4.81355	4.41316	61.1632	3.5831
486.144	4.70427	3.61396	5.54283	3.70728			486.144	3.27692	4.72187	114.395	4.77374				483.482	7.09321	4.84202	74.9499	4.25807			483.482	5.33133	4.33851	56.608	3.39156
486.783	5.83484	4.20212	6.07257	3.33061			486.783	4.17899	4.50915	100.902	4.5703				484.117	8.03003	4.1415	70.9285	4.35113			484.117	5.1456	3.87504	73.0226	3.85945
487.422	4.56603	3.72682	5.52063	3.59064			487.422	4.47222	4.19879	104.968	4.74361				484.752	7.42472	4.36749	72.7807	4.52419			484.752	5.24265	4.76319	66.9346	3.60978
488.06	5.21685	3.84522	5.81594	3.78903			488.06	4.37809	4.90474	74.7018	4.74208				485.388	6.85296	5.01657	65.7288	4.28103			485.388	4.6269	3.98899	58.3666	3.59365
488.699	5.3236	4.07702	5.69989	3.9175			488.699	4.96185	4.33377	123.045	4.76336				486.023	8.29221	4.35674	66.6997	4.48582			486.023	4.83958	4.045	58.0896	3.72854
489.338	4.64896	4.5645	5.74658	3.65785			489.338	4.09601	4.12669	119.877	4.60907				486.658	8.21852	4.95347	74.0715	4.35729			486.658	4.41117	3.77047	101.574	3.59448
489.977	4.7383	3.70492	6.03288	3.70731			489.977	4.13516	4.33799	123.319	4.96131				487.294	8.09629	4.78327	63.0973	4.32254			487.294	4.67689	4.10445	105.436	3.55564
490.616	4.80826	3.97099	5.89204	3.8569			490.616	4.27328	3.59124	117.764	4.58376				487.929	8.49264	4.40283	71.9694	4.68022			487.929	4.93404	4.12921	53.5695	3.78902
491.255	5.09002	3.31707	5.69466	3.69162			491.255	5.81309	4.23077	97.4316	4.81697				488.564	7.68872	4.96255	65.2223	4.68263			488.564	4.80695	3.90543	52.1128	3.67833
491.893	4.43432	4.51574	5.79051	3.65646			491.893	4.86514	4.06757	117.969	4.51525				489.199	8.08939	4.97539	69.571	4.61593			489.199	5.01524	5.15009	53.3392	3.60387
492.532	4.6698	4.05855	5.75756	3.79519			492.532	4.21508	4.15019	116.762	4.77984				489.835	7.90154	4.80261	79.7077	4.77079			489.835	8.15872	4.47208	102.421	3.59001
493.171	4.23715	3.22827	6.11674	3.5766			493.171	3.75385	4.1112	121.658	4.81405				490.47	7.86477	4.04168	66.6707	4.58686			490.47	7.83571	4.28471	64.2635	3.54381
493.81	4.5269	4.1652	5.93469	3.60558			493.81	3.97436	4.64129	127.659	4.87901				491.105	8.35772	4.45878	59.3066	4.58567			491.105	7.46977	4.51571	43.5456	3.61299
494.449	4.84134	3.75483	5.76225	3.75892			494.449	4.00955	4.70033	122.802	4.64716				491.741	7.77217	4.3351	51.4434	4.75675			491.741	7.65932	4.48937	61.0624	3.66391
495.087	4.84459	3.68223	6.01268	3.80196			495.087	3.69667	3.94803	116.853	4.95618				492.376	8.28861	4.73756	51.2071	4.87105			492.376	7.32874	4.66838	65.3108	3.86228
495.726	4.6579	3.4166	5.76235	3.66861			495.726	4.29032	4.06841	121.303	4.85145				493.011	8.46095	4.65986	71.8892	4.74723			493.011	6.69459	4.59446	101.889	3.86641
496.365	4.93249	3.99865	5.68584	3.7042			496.365	3.8909	4.70446	117.321	4.58982				493.647	5.08001	4.34304	63.6617	4.7045			493.647	7.11355	5.16805	96.973	3.99117
497.004	4.77014	3.88853	5.86979	3.56971			497.004	4.54941	4.58584	118.164	4.43687				494.282	5.80806	3.82396	60.7519	4.62177			494.282	7.11222	4.66241	91.3157	3.79733
497.643	4.7968	3.8463	5.77033	3.46277			497.643	3.74034	4.38925	117.769	4.47954				494.917	6.368	4.34883	72.9007	4.83996			494.917	5.95287	6.06011	100.41	3.93465
498.282	4.47077	3.64327	5.89418	3.46909			498.282	3.77159	4.56418	118.938	4.48504				495.553	6.7372	4.92384	83.0572	4.64212			495.553	7.88347	3.81087	102.274	3.72189
498.92	4.68604	3.37316	5.99156	3.32093			498.92	3.89751	4.02712	117.664	4.3832				496.188	6.73996	4.57156	67.8224	4.66622			496.188	6.57413	4.22829	98.9842	3.93948
499.559	4.54481	3.54853	5.89318	3.48666			499.559	4.27511	4.92553	117.713	4.65878				496.823	6.69839	4.04919	55.1909	4.53977			496.823	6.12671	5.28849	59.8305	3.71952
500.198	4.4239	3.72392	5.87576	3.56156			500.198	4.17531	4.19067	117.362	4.60979				497.459	6.6161	4.75912	51.1108	4.75771			497.459	6.5743	5.3807	58.1269	4.14
															498.094	6.767	4.51146	51.0548	4.79093			498.094	6.76215	4.99007	65.262	3.78007
															498.729	7.22354	4.03737	46.7012	5.225			498.729	5.71083	3.93599	59.5278	3.62789
															499.365	6.86423	4.05049	57.0821	4.88405			499.365	7.19551	5.38851	100.599	3.88267
															500	5.66854	4.25278	53.2987	4.63939			500	7.06828	5.21725	93.3296	3.80635
