# Supplementary material for: Conserved allosteric inhibition mechanism in SLC1 transporters
Source: eLife. 2023 Mar 1;12:e83464. doi: 10.7554/eLife.83464 (PMC10017108; doi:10.7554/eLife.83464)
Supplement: Figure 5—source data 1. [file elife-83464-fig5-data1.xlsx]

## Sheet: Sheet1
Figure 5 original data		MD Simulation
Figure 5D	MD for EAAT1-UCPH																						Figure 5E	MD for rASCT2-UCPH																								Figure 5F	MD for F136Y/I237M-UCPH
		exp1 Distance (Å)					exp2 Distance (Å)						exp3 Distance (Å)					exp4 Distance (Å)						exp1 Distance (Å)						exp2 Distance (Å)						exp3Distance (Å)						exp4 Distance (Å)							exp1 Distance (Å)
	Time (ns)	UCPH to M271	UCPH to I237	RMSD		Time (ns)	UCPH to M271	UCPH to I237	RMSD			Time (ns)	UCPH to M271	UCPH to I237	RMSD		Time (ns)	UCPH to M271	UCPH to I237	RMSD			Time (ns)	UCPH to F136	UCPH to I237	substrate to S353	RMSD		Time (ns)	UCPH to F136	UCPH to I237	substrate to S353	RMSD		Time (ns)	UCPH to F136	UCPH to I237	substrate to S353	RMSD		Time (ns)	UCPH to F136	UCPH to I237	substrate to S353	RMSD			Time (ns)	UCPH to Y136
	0	4.54638	3.34668	0		0	3.95264	4.81984	0			0	4.06279	3.60017	0		0	4.74746	2.88361	0			0	6.78261	5.61888	5.80856	0		0	7.36891	5.11314	5.89521	0		0	7.28921	5.12671	5.63019	0		0	4.72315	4.44067	5.68899	0			0	5.51563
	0.294118	4.099	3.54953	0.94915		0.369004	3.5875	4.42406	0.906			0.369004	4.8509	2.8821	1.04178		0.160256	4.50859	2.8221	0.78498			0.598802	7.94179	4.87512	5.83659	1.44951		0.598802	5.09431	4.92317	5.79292	1.49949		0.598802	9.15263	5.3412	6.05974	1.57123		0.598802	6.42679	4.09607	5.57385	1.46425			0.665814	5.84839
	0.588235	4.13233	3.35406	1.09945		0.738007	4.69033	4.44935	0.99068			0.738007	4.01241	2.89017	0.98092		0.320513	4.29016	2.90504	0.70952			1.1976	8.0426	4.45146	5.84328	1.47037		1.1976	5.88562	4.2183	5.97547	1.58108		1.1976	10.4228	5.74051	5.92378	1.7482		1.1976	5.5251	4.26258	6.35205	1.46125			1.33163	4.67918
	0.882353	4.60068	3.04022	1.08134		1.10701	4.3501	4.38097	1.01007			1.10701	4.50731	3.19206	0.97547		0.480769	3.60552	2.86156	0.79574			1.79641	6.33466	4.55812	5.78822	1.54127		1.79641	5.33893	4.35582	5.78575	1.74457		1.79641	9.24147	5.8284	5.94787	1.60412		1.79641	7.1835	3.97148	5.9535	1.43494			1.99744	4.9689
	1.17647	4.26507	3.00972	1.06343		1.47601	4.42923	4.98974	1.09425			1.47601	3.69164	2.72902	1.07667		0.641026	4.03406	2.80677	0.84203			2.39521	5.35266	5.12459	5.92838	1.55856		2.39521	4.8982	5.19186	5.45296	1.7563		2.39521	9.3275	6.40266	5.74702	1.66989		2.39521	7.081	4.51338	5.64325	1.43175			2.66326	5.77328
	1.47059	4.44758	3.48007	1.2446		1.84502	4.22722	5.43042	1.17196			1.84502	3.32037	2.82166	1.07405		0.801282	3.66196	2.92165	0.90562			2.99401	6.68884	4.88328	6.01252	1.49261		2.99401	5.20524	4.88666	5.44609	1.81051		2.99401	9.04674	5.6555	5.99374	1.71465		2.99401	7.31223	4.96286	6.00045	1.46923			3.32907	5.54878
	1.76471	3.74317	3.2287	1.29761		2.21402	4.47278	5.65133	1.20892			2.21402	4.21375	3.15719	1.15052		0.961538	3.84361	3.08173	0.84138			3.59281	5.94111	4.57935	5.93921	1.58862		3.59281	5.84395	4.777	5.56812	1.79272		3.59281	8.6661	5.61219	5.69253	1.66935		3.59281	6.2942	4.97531	5.5196	1.49913			3.99489	4.84898
	2.05882	4.72256	3.29833	1.29559		2.58303	3.6193	5.36216	1.30241			2.58303	3.47398	2.9492	1.17541		1.12179	3.52985	3.0236	0.91642			4.19162	5.32552	4.11457	5.83876	1.54175		4.19162	5.76832	5.16859	5.54958	1.79983		4.19162	7.35325	5.56933	5.50989	1.64101		4.19162	7.10779	4.96124	5.28348	1.53181			4.6607	5.33573
	2.35294	3.73798	2.89031	1.25629		2.95203	3.57742	4.85249	1.22452			2.95203	3.3835	2.97824	1.0629		1.28205	3.69377	3.08452	0.94028			4.79042	6.07171	3.988	6.03571	1.49838		4.79042	4.84914	4.80947	5.45159	1.69648		4.79042	10.2515	5.56361	5.92757	1.73852		4.79042	6.1045	4.04656	5.42561	1.57173			5.32652	4.91254
	2.64706	3.40129	3.11753	1.29047		3.32103	3.76121	4.71153	1.25533			3.32103	4.53635	2.87807	1.24705		1.44231	3.73919	2.77705	1.0356			5.38922	5.30952	4.40142	5.74756	1.57372		5.38922	5.45033	5.20126	5.28782	1.6881		5.38922	10.705	6.74837	5.83227	1.63734		5.38922	6.12228	4.76399	5.25076	1.49975			5.99233	5.39332
	2.94118	4.70108	3.10019	1.29029		3.69004	4.07351	4.50345	1.28336			3.69004	4.22469	3.05443	1.12538		1.60256	3.84292	3.15355	1.00304			5.98802	5.14978	5.37401	5.64005	1.53705		5.98802	5.27847	5.56833	5.37273	1.73004		5.98802	10.0286	6.83762	5.99673	1.70579		5.98802	6.02156	4.72075	5.15288	1.612			6.65814	4.99337
	3.23529	3.40766	2.73175	1.42786		4.05904	3.40539	4.75698	1.33167			4.05904	3.75439	2.92417	1.09117		1.76282	4.55794	3.00268	1.01759			6.58683	4.75085	4.56199	5.5267	1.58042		6.58683	5.57277	4.6726	5.83641	1.8164		6.58683	11.2251	5.89107	5.86956	1.73817		6.58683	5.88733	4.70552	5.38028	1.4987			7.32396	5.969
	3.52941	3.92362	2.67134	1.25087		4.42804	3.64197	4.43432	1.13985			4.42804	4.33671	2.87867	0.98927		1.92308	3.37226	2.81291	0.97797			7.18563	5.84899	4.24653	5.63162	1.60893		7.18563	4.64616	4.3447	5.76361	1.7757		7.18563	12.6918	8.64233	5.68552	1.62561		7.18563	4.94359	4.05048	5.37901	1.47863			7.98977	4.72331
	3.82353	4.56614	3.16291	1.4103		4.79705	3.71908	4.54568	1.31757			4.79705	3.79993	2.86521	1.14582		2.08333	4.05775	2.8914	1.07269			7.78443	4.68883	4.57195	5.89387	1.59049		7.78443	4.78778	5.01678	6.04863	1.74856		7.78443	11.5476	7.18689	5.67634	1.72868		7.78443	4.95473	4.79719	5.5218	1.50961			8.65559	5.08864
	4.11765	3.95956	2.72292	1.39487		5.16605	4.14205	4.57157	1.38623			5.16605	4.38875	2.7847	1.10284		2.24359	4.16273	3.11359	1.05182			8.38323	5.10795	4.94824	5.96084	1.58383		8.38323	4.96344	4.14534	5.7465	1.73914		8.38323	9.54783	6.10607	5.56839	1.77831		8.38323	5.19014	4.3556	5.69258	1.60975			9.3214	5.28775
	4.41176	4.29475	3.23331	1.44415		5.53506	4.55263	4.95582	1.30202			5.53506	5.42221	2.89116	1.1151		2.40385	3.63522	2.97356	0.98524			8.98204	4.12117	4.77861	5.78531	1.55677		8.98204	5.16559	4.0793	5.94896	1.76545		8.98204	10.0616	6.96923	5.64242	1.6552		8.98204	4.98813	4.22542	5.56145	1.58402			9.98722	6.11894
	4.70588	4.38808	3.02493	1.61764		5.90406	3.46789	5.43276	1.28124			5.90406	3.91184	2.95362	1.08263		2.5641	4.62613	2.93408	0.90083			9.58084	4.68948	5.2835	5.65353	1.69356		9.58084	5.17216	4.42035	6.21047	1.74455		9.58084	10.99	6.73094	5.61991	1.81042		9.58084	5.07437	4.57018	5.4254	1.61535			10.653	5.53187
	5	4.4425	3.03979	1.42527		6.27306	4.31031	4.1999	1.28921			6.27306	3.70124	2.72719	1.16503		2.72436	4.2356	3.02824	0.88181			10.1796	5.03824	3.98401	5.67274	2.11935		10.1796	5.88259	4.27021	6.68801	2.25495		10.1796	9.87583	5.70719	5.72982	2.56499		10.1796	6.9315	4.71481	5.16463	1.57099			11.3188	5.24667
	5.29412	3.64244	2.9093	1.41579		6.64207	3.59976	5.19628	1.4964			6.64207	4.05391	2.8879	1.28271		2.88462	3.86639	3.15506	0.96601			10.7784	5.8287	5.75879	5.61205	2.20922		10.7784	5.39746	5.21414	5.84134	2.11749		10.7784	9.97717	6.66632	5.66465	2.85436		10.7784	5.73068	4.85003	5.89661	1.5858			11.9847	5.12404
	5.58824	4.46131	2.89748	1.45669		7.01107	4.00149	4.36029	1.52358			7.01107	4.6998	3.36603	1.24246		3.04487	3.82758	3.0505	1.05106			11.3772	4.69592	3.9904	5.49295	2.44772		11.3772	5.47929	5.89826	5.90642	2.35462		11.3772	10.3364	5.82418	5.64257	2.31055		11.3772	9.25066	4.54518	5.40068	1.59387			12.6505	4.97231
	5.88235	3.99579	3.25545	1.54908		7.38007	3.36492	4.58117	1.41993			7.38007	5.10389	2.86447	1.21833		3.20513	4.81674	2.98237	0.95906			11.976	5.4889	4.80282	5.64697	2.53567		11.976	5.33302	5.41909	6.11655	2.78988		11.976	10.3334	6.03255	5.88509	2.44287		11.976	8.2219	4.38452	5.3136	1.60589			13.3163	5.51746
	6.17647	3.8004	3.18556	1.39167		7.74908	3.82894	4.70915	1.41187			7.74908	4.15267	2.89129	1.25806		3.36538	4.34253	3.61697	1.02205			12.5749	8.39869	6.43918	5.78412	2.69838		12.5749	5.33093	5.65166	5.99857	3.06415		12.5749	11.9147	6.37738	5.63629	2.27457		12.5749	7.93631	6.09598	5.35679	1.52947			13.9821	4.99108
	6.47059	3.73282	2.86562	1.63708		8.11808	3.78662	4.92528	1.47436			8.11808	3.50067	3.20319	1.26882		3.52564	4.02886	2.80147	1.01412			13.1737	8.50569	5.05916	5.8246	2.53024		13.1737	5.05055	5.62252	6.89478	2.30181		13.1737	11.8098	6.40205	6.01401	2.32635		13.1737	9.1084	6.47579	5.3777	1.53744			14.6479	5.48751
	6.76471	4.11515	2.87777	1.65281		8.48708	3.64824	4.78838	1.5905			8.48708	4.68131	3.67006	1.32565		3.6859	3.69167	2.78934	0.95814			13.7725	4.98985	4.72654	5.73694	2.78967		13.7725	5.05234	5.7358	5.66284	2.76487		13.7725	11.2108	6.28595	5.51208	2.56499		13.7725	9.49982	6.41859	5.53385	1.58184			15.3137	6.47331
	7.05882	4.3229	2.89975	1.63008		8.85609	3.4024	4.6019	1.51832			8.85609	3.58367	2.82777	1.29636		3.84615	3.54657	3.03975	0.9635			14.3713	7.63507	4.60474	5.85429	2.53337		14.3713	4.71805	6.23615	5.95611	2.67797		14.3713	10.7402	5.98334	5.78659	2.36699		14.3713	9.45993	6.2667	5.3381	1.53979			15.9795	5.17889
	7.35294	3.69396	3.18192	1.813		9.22509	3.20609	5.12232	1.46965			9.22509	4.1388	2.94104	1.27114		4.00641	3.94636	3.04502	1.05402			14.9701	5.38023	5.11115	5.4887	2.31149		14.9701	5.6905	5.32829	5.72851	2.65816		14.9701	10.5557	6.41051	5.79819	2.40751		14.9701	8.55966	4.8468	5.61752	1.64767			16.6454	5.40504
	7.64706	4.05604	3.03141	1.86988		9.5941	4.0246	4.90679	1.41053			9.5941	4.34854	2.99651	1.25403		4.16667	4.14066	2.83228	1.15479			15.5689	5.44758	5.69844	5.67495	2.59841		15.5689	5.10625	4.15343	5.31942	2.56016		15.5689	9.56028	4.67453	5.60647	2.35028		15.5689	8.16745	5.09781	5.40796	1.67091			17.3112	5.41138
	7.94118	3.77988	3.13369	1.91031		9.9631	4.32942	5.22467	1.36198			9.9631	4.36662	2.91151	1.54654		4.32692	3.86814	3.15723	1.1024			16.1677	5.39705	5.17877	5.97366	2.60329		16.1677	4.35152	4.57002	5.92956	2.56817		16.1677	9.19028	5.15858	6.59039	2.52709		16.1677	7.89633	5.69289	5.51558	1.64771			17.977	5.13025
	8.23529	4.86211	3.04996	1.9809		10.3321	3.9446	4.89393	1.46213			10.3321	3.91893	3.22168	1.30717		4.48718	3.90143	2.91154	1.07504			16.7665	4.3931	4.60478	5.55982	2.4463		16.7665	5.88674	4.56608	5.80688	2.44796		16.7665	9.20951	5.39792	6.90773	2.65564		16.7665	8.19712	6.19196	5.61809	1.64791			18.6428	5.26503
	8.52941	4.28711	3.23634	1.90823		10.7011	4.1736	5.07104	1.29911			10.7011	4.83447	3.04058	1.51109		4.64744	3.71874	3.1295	1.06853			17.3653	4.51499	5.88551	5.667	2.28344		17.3653	4.24514	4.30734	5.66294	2.2776		17.3653	9.99712	4.85382	6.37125	2.65934		17.3653	8.22026	5.82301	5.55012	1.53414			19.3086	5.77848
	8.82353	4.59814	3.00886	1.82338		11.0701	3.83145	4.73768	1.56708			11.0701	3.51041	3.13834	1.4343		4.80769	3.28612	2.77579	0.98899			17.9641	4.89111	5.00653	5.66766	2.44088		17.9641	4.30026	4.8309	5.48268	2.50925		17.9641	11.3347	5.44709	7.11572	2.35015		17.9641	12.4209	10.06	5.77497	1.51765			19.9744	5.01565
	9.11765	4.63182	2.86017	1.93859		11.4391	3.62996	4.75223	1.6348			11.4391	4.17144	2.8704	1.43138		4.96795	3.9419	2.88961	0.98913			18.5629	5.00515	4.3353	5.77975	2.34024		18.5629	5.77875	4.02117	5.57792	2.42728		18.5629	9.94895	5.57372	5.69756	2.56549		18.5629	10.7544	7.99256	5.15697	1.61232			20.6402	4.6629
	9.41176	3.9326	3.21302	1.89394		11.8081	3.82796	4.47668	1.45649			11.8081	4.22288	3.08949	1.42898		5.12821	3.52367	3.00674	1.1066			19.1617	4.50418	5.43168	5.63093	2.34157		19.1617	5.20306	4.44542	5.50597	2.55838		19.1617	10.9553	5.05302	5.27028	2.54287		19.1617	10.1778	6.76424	5.58511	1.71206			21.3061	4.91897
	9.70588	4.40034	2.94849	1.77952		12.1771	4.1507	4.55438	1.61979			12.1771	4.62665	3.25904	1.4986		5.28846	4.22524	3.12816	1.05858			19.7605	4.46247	4.88025	5.81732	2.39318		19.7605	5.11976	4.16046	5.60004	3.02896		19.7605	9.36482	5.45013	6.55256	2.72437		19.7605	10.408	7.49673	5.49712	1.95386			21.9719	5.16292
	10	3.56312	3.05375	1.84931		12.5461	4.24852	4.75601	1.569			12.5461	3.95602	3.57385	1.62461		5.44872	3.98904	2.83432	1.09879			20.3593	4.1876	4.78237	5.72408	2.48211		20.3593	4.78535	4.11354	5.73713	2.58041		20.3593	10.4779	5.22551	6.60261	2.67537		20.3593	11.4127	7.26164	5.00685	2.41986			22.6377	4.72535
	10.2941	3.6446	3.03644	1.95561		12.9151	3.3502	5.29022	1.66308			12.9151	3.76224	3.01219	1.43245		5.60897	4.20784	2.84079	1.04183			20.9581	4.56312	5.69046	5.89772	2.5103		20.9581	4.64184	4.36777	5.74943	2.55445		20.9581	10.3795	6.26431	5.62021	2.75098		20.9581	13.4619	8.08667	5.48475	2.00866			23.3035	4.76645
	10.5882	3.89062	3.12602	1.87504		13.2841	4.73597	4.8125	1.58978			13.2841	3.88128	3.40175	1.32662		5.76923	3.93946	3.03109	1.10955			21.5569	5.08193	4.65376	5.79943	2.50295		21.5569	5.89229	4.04138	5.31939	2.48102		21.5569	9.53455	5.46999	5.45974	2.92892		21.5569	11.3777	6.491	7.61792	2.2709			23.9693	4.63295
	10.8824	3.84575	2.8647	1.92711		13.6531	3.89588	4.88984	1.5386			13.6531	4.0292	3.56198	1.49334		5.92949	3.9125	2.83363	1.05757			22.1557	5.79048	5.1413	5.59924	2.37355		22.1557	5.41639	4.59422	5.32181	2.79465		22.1557	10.0398	5.36785	5.49896	2.80866		22.1557	11.1996	6.98977	6.08201	2.25494			24.6351	5.47223
	11.1765	3.46379	3.31873	1.8912		14.0221	4.56618	4.82186	1.61595			14.0221	3.36683	2.99097	1.46131		6.08974	3.9775	2.64448	1.11754			22.7545	6.61052	4.01588	5.96911	2.4973		22.7545	5.73034	4.59374	5.84188	2.85268		22.7545	10.2396	5.4249	5.50291	2.65024		22.7545	11.8442	6.96289	5.68395	2.71597			25.3009	5.04648
	11.4706	3.34875	2.85264	1.75801		14.3911	3.89344	4.6802	1.50695			14.3911	3.43814	3.22637	1.42557		6.25	4.59055	2.79681	1.13739			23.3533	6.19187	6.51089	6.02814	2.42487		23.3533	6.07189	4.72444	5.26735	3.2804		23.3533	10.3467	4.91782	5.52344	2.69396		23.3533	10.3518	6.31868	5.60546	2.56288			25.9668	4.95022
	11.7647	4.18923	2.87751	1.79408		14.7601	3.79354	4.83989	1.49443			14.7601	4.24153	2.80053	1.62274		6.41026	4.27304	3.07809	1.14325			23.9521	5.8761	4.38474	5.92628	2.20971		23.9521	5.66198	4.30015	5.62512	2.86243		23.9521	10.2016	4.10754	5.8549	2.62322		23.9521	11.1766	7.48095	5.52772	2.43564			26.6326	4.7418
	12.0588	4.0031	3.00817	1.92499		15.1292	3.97145	4.73606	1.55844			15.1292	4.12066	3.22115	1.42506		6.57051	3.58184	2.86915	1.08881			24.5509	5.65645	5.57752	5.95788	2.41376		24.5509	5.68719	3.96045	5.86982	3.06655		24.5509	10.1538	4.5113	5.98004	2.89793		24.5509	10.1553	6.64222	5.46917	3.06552			27.2984	4.58224
	12.3529	4.29505	3.06636	1.90498		15.4982	4.24507	4.84067	1.40892			15.4982	3.63321	2.97731	1.45037		6.73077	4.32755	2.84844	1.09856			25.1497	4.53284	4.59209	6.18684	2.31358		25.1497	5.75817	4.01383	5.86461	3.08121		25.1497	10.2071	5.59395	5.76367	2.63358		25.1497	9.07772	6.96308	6.45953	2.76747			27.9642	5.32706
	12.6471	3.66698	3.07903	1.94109		15.8672	3.52355	4.79823	1.44507			15.8672	4.30883	3.06504	1.49068		6.89103	4.20712	2.94199	1.07039			25.7485	4.71203	4.22996	6.12216	2.40198		25.7485	4.97676	4.8345	5.64442	3.10523		25.7485	10.9378	4.27194	5.45317	2.44583		25.7485	11.2161	7.17917	5.707	3.21698			28.63	5.43012
	12.9412	4.4138	2.85971	1.93175		16.2362	3.29605	4.30373	1.53764			16.2362	4.14976	2.95731	1.42434		7.05128	4.43949	2.95464	1.07585			26.3473	5.29578	4.18289	6.22833	2.33616		26.3473	5.38395	5.47536	5.88911	2.67175		26.3473	10.9373	6.504	5.77073	2.44714		26.3473	9.49174	6.96746	5.51192	2.84932			29.2958	4.97763
	13.2353	3.64751	3.00432	1.88097		16.6052	3.94467	4.38728	1.56587			16.6052	3.99305	3.11913	1.54198		7.21154	4.12232	3.00349	1.12143			26.9461	4.73017	5.00338	5.90096	2.27826		26.9461	6.14737	4.53529	5.57043	2.63111		26.9461	8.88949	5.37138	5.69651	2.74804		26.9461	11.9249	6.58137	5.82929	2.64715			29.9616	5.66948
	13.5294	4.28999	2.9904	1.94554		16.9742	4.05535	4.91637	1.47944			16.9742	3.57674	3.0665	1.55253		7.37179	4.99345	3.04753	1.16508			27.5449	4.56695	5.7045	5.7977	2.32905		27.5449	5.21417	3.37507	5.00203	2.78075		27.5449	10.5407	5.76455	5.44785	2.74887		27.5449	11.1034	6.47422	6.38644	2.8586			30.6275	5.33835
	13.8235	3.53315	2.83549	2.03749		17.3432	3.60987	4.57546	1.59834			17.3432	3.30272	2.8399	1.38223		7.53205	4.3364	2.91644	1.16764			28.1437	5.50137	4.5312	6.02088	2.20017		28.1437	5.05418	3.25594	5.32383	2.90513		28.1437	10.3953	5.11601	5.59787	2.52036		28.1437	10.7693	5.47099	5.80949	2.9562			31.2933	4.61444
	14.1176	4.15112	2.91351	1.99281		17.7122	4.2738	5.05709	1.46752			17.7122	3.79045	2.97541	1.54671		7.69231	4.64395	3.1349	1.04696			28.7425	4.54893	5.84806	5.72383	2.46829		28.7425	5.26459	3.95376	5.47268	2.52066		28.7425	9.53335	6.96101	6.03183	2.8493		28.7425	11.1042	6.49984	6.16697	2.94841			31.9591	4.91167
	14.4118	3.79747	3.10405	2.03704		18.0812	4.03149	4.37399	1.42057			18.0812	3.79521	3.08286	1.49819		7.85256	3.97829	2.76082	1.08052			29.3413	4.76324	5.317	6.19728	2.43209		29.3413	5.0487	4.27509	5.83851	2.70031		29.3413	10.3355	4.76507	6.66034	2.74358		29.3413	11.3048	6.86243	5.14537	2.81395			32.6249	5.75327
	14.7059	4.93758	2.86885	2.05237		18.4502	3.64397	4.70279	1.4021			18.4502	3.52909	2.82189	1.46354		8.01282	4.61014	2.98433	1.13484			29.9401	4.85221	5.59618	5.94229	2.36783		29.9401	4.59367	3.75499	5.961	2.96345		29.9401	9.96331	4.97368	5.70271	3.04561		29.9401	10.5982	6.50531	5.48771	2.58768			33.2907	5.22084
	15	3.65095	2.9624	2.17758		18.8192	5.08619	4.65697	1.31433			18.8192	3.59363	2.98192	1.50294		8.17308	3.6752	3.00775	1.09889			30.5389	5.9116	4.38561	6.11256	2.39563		30.5389	5.173	3.48973	5.78063	2.7965		30.5389	10.5453	4.74566	5.86104	2.81079		30.5389	10.3348	6.5456	4.92391	2.74657			33.9565	5.02985
	15.2941	4.02571	2.86305	1.9765		19.1882	4.50373	4.86733	1.28874			19.1882	3.54293	3.04624	1.50672		8.33333	4.64852	2.87995	1.18584			31.1377	4.86053	4.65396	5.97829	2.48314		31.1377	5.0876	3.92148	5.9664	2.63611		31.1377	9.9314	5.17928	6.77551	2.98303		31.1377	10.9585	5.61464	5.25289	2.71001			34.6224	5.07199
	15.5882	4.10933	3.11097	2.17072		19.5572	3.79427	4.82925	1.37736			19.5572	3.87632	3.18649	1.44255		8.49359	3.80933	3.13492	1.10805			31.7365	4.88891	5.04351	6.01494	2.43322		31.7365	5.38267	4.06798	6.25021	2.72697		31.7365	10.2996	6.14686	6.06646	3.03831		31.7365	10.8019	6.13436	5.05266	2.42363			35.2882	5.09324
	15.8824	4.19093	2.79369	2.07097		19.9262	3.74056	4.53696	1.50297			19.9262	4.36321	3.06783	1.47167		8.65385	4.63539	3.47116	1.26558			32.3353	4.97431	4.47355	6.10229	2.58973		32.3353	4.90668	3.69321	6.00413	2.91569		32.3353	10.6219	6.61495	5.69636	2.97261		32.3353	9.7255	6.73403	5.20621	2.62295			35.954	5.59055
	16.1765	3.80686	3.11146	2.09656		20.2952	3.68262	5.11024	1.55306			20.2952	3.47227	3.28213	1.55629		8.8141	3.537	3.02244	1.27782			32.9341	4.87717	5.50897	5.83892	2.52012		32.9341	5.60318	3.69297	5.29223	2.70796		32.9341	9.34626	5.10566	7.26546	3.0098		32.9341	11.6545	6.57512	5.59601	2.67326			36.6198	5.33794
	16.4706	3.72474	3.00256	2.07429		20.6642	3.74579	4.85798	1.41585			20.6642	4.05335	2.95695	1.37367		8.97436	4.26161	2.91338	1.41711			33.5329	5.59304	5.22977	6.08355	2.58184		33.5329	5.12428	3.6637	5.70509	2.5433		33.5329	10.4205	5.64636	5.75887	2.99872		33.5329	8.39502	5.24573	5.44252	2.70431			37.2856	5.42489
	16.7647	3.2308	2.99173	2.2343		21.0332	3.99009	4.42339	1.5416			21.0332	4.06985	3.16046	1.36562		9.13462	4.55347	3.33907	1.34147			34.1317	5.33633	5.9658	6.04725	2.497		34.1317	5.35066	3.96344	5.19038	2.62453		34.1317	10.217	5.84574	5.59473	3.21677		34.1317	11.9101	6.48793	5.25714	2.66476			37.9514	5.18843
	17.0588	4.30727	2.84501	2.07627		21.4022	3.64604	4.87298	1.51595			21.4022	3.56357	2.8067	1.40083		9.29487	3.51857	2.70562	1.38719			34.7305	5.56685	4.7885	5.87533	2.50643		34.7305	5.68287	3.43006	6.22704	2.72973		34.7305	10.0759	6.38994	5.57253	3.04241		34.7305	10.555	6.14608	5.28315	2.59971			38.6172	5.13136
	17.3529	3.42216	3.30189	2.23375		21.7712	5.01376	4.88919	1.60677			21.7712	4.23123	2.93175	1.55316		9.45513	4.16945	3.03459	1.35659			35.3293	5.62844	5.28613	6.35255	2.66869		35.3293	5.99731	3.08504	5.6003	3.07119		35.3293	10.0305	5.59452	5.47384	2.97858		35.3293	9.66563	6.25419	4.87711	2.62266			39.2831	4.72031
	17.6471	4.13452	3.0279	2.10231		22.1402	3.41468	4.51454	1.70087			22.1402	3.58316	3.03907	1.55162		9.61538	3.81378	2.8314	1.42902			35.9281	6.1331	3.96932	5.80685	2.72646		35.9281	5.35525	3.75753	6.39877	3.05792		35.9281	10.5171	6.61511	5.72436	3.08013		35.9281	11.339	5.36116	4.9551	3.23121			39.9489	4.79657
	17.9412	3.73029	3.00243	2.17644		22.5092	3.37322	5.13314	1.51948			22.5092	3.58264	2.96324	1.6458		9.77564	4.26906	2.86397	1.5278			36.5269	5.43429	4.29472	5.84242	2.80286		36.5269	4.75197	3.43602	5.76855	3.25763		36.5269	9.23024	5.35815	5.86826	2.67102		36.5269	10.8965	6.57228	5.21013	2.93948			40.6147	4.51616
	18.2353	3.64536	3.17262	2.12043		22.8782	4.19232	4.75523	1.63007			22.8782	3.50057	2.91867	1.56196		9.9359	4.40726	3.02283	1.5935			37.1257	4.69063	4.60058	5.80542	2.56815		37.1257	4.77935	4.03588	5.65776	3.08254		37.1257	10.1856	5.14244	5.69052	2.80414		37.1257	10.912	5.68015	5.12161	3.14203			41.2805	5.36249
	18.5294	4.66563	2.92755	2.09938		23.2472	4.0116	4.7749	1.29691			23.2472	3.13964	2.78475	1.45776		10.0962	3.84351	3.00826	1.47026			37.7246	5.11844	5.65685	6.18009	2.45456		37.7246	4.98475	3.34604	5.93349	2.8498		37.7246	10.4421	5.96085	6.11523	2.99989		37.7246	10.4969	5.16876	5.10042	3.39758			41.9463	4.94635
	18.8235	3.93686	2.77083	2.1432		23.6162	4.22714	5.30404	1.41492			23.6162	3.18313	2.82803	1.49952		10.2564	3.87721	3.62496	1.47476			38.3234	5.26122	5.30579	5.75454	2.45288		38.3234	5.85451	3.92452	5.84301	3.17886		38.3234	11.3412	6.70097	7.40875	2.84478		38.3234	10.8702	6.41175	5.55065	3.76305			42.6121	5.55528
	19.1176	3.71168	2.87147	1.99279		23.9852	4.08644	5.01988	1.31792			23.9852	3.67177	2.90101	1.57533		10.4167	4.27959	2.81199	1.474			38.9222	4.99944	4.6907	5.85572	2.66554		38.9222	5.48398	3.68357	5.81282	2.50636		38.9222	9.1197	6.305	5.93623	2.71848		38.9222	11.7512	6.12518	5.68615	3.39422			43.2779	4.7703
	19.4118	3.84236	2.74739	1.96967		24.3542	4.2136	4.95997	1.53654			24.3542	3.26149	2.87344	1.61084		10.5769	3.77221	3.12574	1.46133			39.521	5.35701	5.1208	5.80999	2.56121		39.521	4.84862	4.05893	6.26913	2.93225		39.521	10.7106	5.97088	5.44815	2.8197		39.521	12.1102	6.15764	5.72302	3.47227			43.9438	5.57826
	19.7059	4.37348	3.09276	2.06668		24.7232	3.97835	4.66046	1.63383			24.7232	3.47625	3.06641	1.60379		10.7372	4.2072	2.87179	1.5296			40.1198	4.91403	4.43767	5.61562	2.71549		40.1198	4.93283	3.37463	5.71944	2.89529		40.1198	10.2679	4.67549	6.5728	2.89315		40.1198	9.96185	5.77602	5.63693	3.37009			44.6096	4.99381
	20	4.43905	2.88161	2.06615		25.0923	3.42208	4.65057	1.5895			25.0923	3.75527	3.44299	1.47045		10.8974	4.22515	2.91454	1.44886			40.7186	4.99194	4.84601	6.12094	2.92278		40.7186	5.03916	3.61062	5.76539	3.06234		40.7186	8.70556	6.08961	6.61551	2.95132		40.7186	10.7026	5.10278	5.59991	3.48598			45.2754	5.06103
	20.2941	4.1777	2.76308	2.09355		25.4613	3.73513	4.83002	1.49422			25.4613	3.15446	2.88402	1.62303		11.0577	4.02482	2.84523	1.40403			41.3174	5.17183	5.63732	5.67074	2.69192		41.3174	4.88016	3.49569	6.05351	2.77103		41.3174	8.50705	5.67016	5.96509	2.97449		41.3174	11.5286	5.79486	5.63961	3.57946			45.9412	5.65048
	20.5882	3.54326	3.05737	2.12		25.8303	4.57755	5.02892	1.73329			25.8303	3.52531	3.05758	1.65951		11.2179	4.91439	2.96312	1.39787			41.9162	5.72882	4.64032	5.87314	2.94854		41.9162	4.42632	3.93653	6.05837	2.95381		41.9162	8.62001	4.99075	5.76617	2.94744		41.9162	10.4565	6.53842	5.63106	3.29777			46.607	5.35317
	20.8824	4.35214	2.98143	2.18617		26.1993	4.34483	4.83076	1.59427			26.1993	4.02398	3.11057	1.60403		11.3782	4.73162	2.76865	1.31792			42.515	5.70442	5.16014	5.98863	2.84838		42.515	5.0135	3.42244	6.07467	3.01393		42.515	9.45745	4.7718	5.47224	2.83908		42.515	11.1995	6.2675	5.97732	3.27918			47.2728	4.86922
	21.1765	3.56257	2.9138	2.10817		26.5683	3.50376	4.69114	1.58451			26.5683	3.95081	3.24332	1.56131		11.5385	4.16616	3.03524	1.27141			43.1138	5.33773	4.35139	5.8515	2.84873		43.1138	4.84806	3.53895	5.76968	2.96011		43.1138	9.67202	6.1001	5.53794	2.87067		43.1138	9.04558	5.82235	5.47905	3.38207			47.9386	4.97399
	21.4706	3.89803	2.83689	2.23166		26.9373	3.67513	4.61755	1.65803			26.9373	3.74485	3.1078	1.52122		11.6987	3.45931	2.92362	1.31224			43.7126	5.17904	4.79542	5.99448	3.10998		43.7126	5.15046	3.14914	6.20287	2.93243		43.7126	10.1704	4.30364	5.88202	2.7469		43.7126	10.2986	6.28218	5.58944	3.46196			48.6045	5.01903
	21.7647	4.13311	2.94824	1.95627		27.3063	4.16195	4.98615	1.57278			27.3063	4.24673	2.87818	1.59675		11.859	3.95342	2.99918	1.36228			44.3114	4.71328	4.92061	5.88618	3.04808		44.3114	4.57536	3.57809	5.88503	3.05329		44.3114	9.74762	4.75598	5.85583	2.54845		44.3114	8.98822	5.44679	5.59773	3.41301			49.2703	4.90345
	22.0588	4.23127	3.432	1.88433		27.6753	4.04863	4.98896	1.59243			27.6753	4.09118	3.00075	1.59769		12.0192	4.12186	2.87137	1.52038			44.9102	6.32599	4.38142	5.94723	2.98421		44.9102	4.65195	3.55072	5.31618	3.10507		44.9102	10.0117	4.55558	5.4226	2.68239		44.9102	10.4507	5.98987	5.68828	3.56016			49.9361	4.95733
	22.3529	3.73259	3.12503	1.98752		28.0443	3.73418	4.97409	1.60069			28.0443	3.61544	2.90628	1.54143		12.1795	3.98582	2.95902	1.48889			45.509	4.85644	5.15515	5.8828	2.73776		45.509	4.97185	3.77988	5.1971	2.86556		45.509	11.1799	4.4593	5.46832	2.74602		45.509	11.1507	5.60404	5.54677	3.15443			50.6019	5.50943
	22.6471	3.63348	2.86272	1.92438		28.4133	4.14423	5.25136	1.44793			28.4133	4.21456	3.56707	1.45789		12.3397	3.46481	2.94142	1.37438			46.1078	6.05987	4.28759	5.904	3.14883		46.1078	4.64133	3.51997	4.97552	2.7679		46.1078	10.2855	5.19405	5.91115	2.99279		46.1078	9.84301	6.30073	5.51908	3.46635			51.2677	5.04383
	22.9412	3.47493	2.87278	2.07135		28.7823	4.045	4.70955	1.58132			28.7823	3.88991	2.962	1.32685		12.5	3.52148	2.84292	1.32592			46.7066	5.70312	5.0655	6.20485	3.00366		46.7066	5.11281	3.44411	6.01835	2.83231		46.7066	10.3695	4.80296	5.56332	2.96872		46.7066	9.4737	5.1269	5.31481	3.64941			51.9335	4.59947
	23.2353	3.81455	3.15203	2.00005		29.1513	3.94696	5.0694	1.49344			29.1513	4.18541	3.07454	1.4816		12.6603	4.33535	2.83001	1.35725			47.3054	5.01945	5.32903	5.88896	3.05385		47.3054	4.76935	3.45975	5.8585	2.63487		47.3054	10.7697	6.71331	6.00245	2.79181		47.3054	8.65002	5.80621	5.35223	3.17969			52.5993	5.31945
	23.5294	3.58643	3.21231	2.12676		29.5203	3.95398	4.82519	1.41682			29.5203	4.1507	2.80099	1.40893		12.8205	3.26853	2.99156	1.36113			47.9042	5.37006	4.2097	5.79572	3.05048		47.9042	4.78047	3.2753	6.12155	2.4999		47.9042	9.76651	6.77655	5.89493	2.83129		47.9042	9.46944	5.41256	5.33336	3.44607			53.2652	5.41564
	23.8235	4.51593	3.15242	2.07873		29.8893	3.83775	5.11435	1.73556			29.8893	3.94035	2.97748	1.36951		12.9808	4.12117	2.77946	1.28405			48.503	5.37499	5.12737	5.98278	3.15273		48.503	4.87104	3.05601	6.15484	2.52833		48.503	8.27601	5.79446	5.74821	2.76952		48.503	9.98367	5.3673	5.66066	3.08128			53.931	5.08836
	24.1176	3.22375	3.07779	2.14633		30.2583	3.67406	5.29925	1.65228			30.2583	3.47151	2.93339	1.43474		13.141	3.46852	2.89303	1.28683			49.1018	4.80114	4.25145	5.96798	2.94918		49.1018	3.52842	3.42212	5.98361	2.43606		49.1018	9.17283	6.32656	5.708	2.71667		49.1018	10.0622	5.16944	5.61183	3.15969			54.5968	5.18613
	24.4118	3.44737	2.99995	2.15434		30.6273	3.79789	4.85566	1.67027			30.6273	4.0789	2.91365	1.38565		13.3013	4.20725	3.54542	1.33882			49.7006	5.41082	4.24444	6.01169	2.95158		49.7006	5.2706	3.65037	6.04203	2.50122		49.7006	10.6841	6.09255	5.70949	3.11334		49.7006	9.97012	5.82312	5.6113	3.17547			55.2626	5.15995
	24.7059	4.11458	2.88478	2.15294		30.9963	3.57916	4.60611	1.62777			30.9963	3.60901	2.7848	1.33718		13.4615	3.79601	3.40986	1.2904			50.2994	4.9496	4.67935	6.29015	2.98034		50.2994	5.23833	3.62033	5.8307	2.54787		50.2994	10.6136	6.60239	6.06219	2.91614		50.2994	9.88644	5.38876	5.75164	3.32021			55.9284	5.18395
	25	3.70114	2.83851	2.04057		31.3653	3.91736	4.88515	1.6692			31.3653	3.97235	3.23792	1.54505		13.6218	3.53145	2.97155	1.2538			50.8982	5.06936	4.52753	6.06376	3.12191		50.8982	4.72335	3.4379	5.78258	2.68794		50.8982	9.65414	6.10018	5.62112	2.78626		50.8982	10.406	6.5876	5.71805	3.17923			56.5942	5.18588
	25.2941	4.21469	2.98036	2.12203		31.7343	4.12729	5.11436	1.56951			31.7343	3.45989	3.69988	1.47826		13.7821	3.6681	2.98124	1.28675			51.497	5.53524	3.9441	5.80828	3.099		51.497	5.15429	3.5645	5.78906	2.80496		51.497	8.70563	5.70374	6.45236	2.87175		51.497	10.5228	5.45414	5.38046	3.20817			57.26	5.03132
	25.5882	4.00957	2.94218	2.0725		32.1033	4.37227	5.02808	1.69867			32.1033	3.60664	2.83252	1.39688		13.9423	3.91519	2.9459	1.29006			52.0958	5.61281	4.62637	5.70277	3.02543		52.0958	5.97228	3.32621	6.06352	2.84532		52.0958	9.05682	5.36683	5.58611	3.05194		52.0958	11.6742	6.64152	5.86793	3.46376			57.9259	5.79487
	25.8824	3.83829	3.13124	2.05682		32.4723	4.45623	4.93576	1.71801			32.4723	3.32943	3.97388	1.52419		14.1026	3.5415	3.04593	1.3161			52.6946	5.33011	4.74488	6.11559	2.78436		52.6946	5.66844	3.45586	5.78664	2.85199		52.6946	8.38528	4.79897	7.64873	3.10357		52.6946	8.89288	5.67291	5.74047	3.4914			58.5917	5.05253
	26.1765	3.75054	2.69903	2.13136		32.8413	4.37125	4.59409	1.68815			32.8413	3.43243	2.8991	1.46916		14.2628	3.7759	2.95997	1.20816			53.2934	5.96842	4.19978	5.9949	2.85538		53.2934	5.45454	4.53016	5.78247	2.61027		53.2934	8.21396	5.89268	7.52882	2.87887		53.2934	9.97937	5.29359	5.59797	3.36592			59.2575	4.95075
	26.4706	3.52874	2.9123	2.16074		33.2103	3.79391	5.31319	1.68259			33.2103	3.43701	2.92026	1.48046		14.4231	3.83855	2.83116	1.24098			53.8922	4.96197	6.04593	6.36712	3.04172		53.8922	5.61659	3.64743	5.93256	2.94769		53.8922	9.33833	5.17624	7.31631	2.69998		53.8922	12.1859	5.17219	5.6642	3.37078			59.9233	4.95181
	26.7647	3.91081	3.00595	2.11192		33.5793	4.35681	4.84725	1.58541			33.5793	3.4314	3.2358	1.54078		14.5833	4.0166	2.99315	1.2574			54.491	5.2812	4.93538	5.82925	3.31535		54.491	5.80023	3.3808	6.72807	2.97435		54.491	9.70495	5.65798	5.71203	3.00939		54.491	9.0408	5.30147	5.75159	3.28811			60.5891	5.20308
	27.0588	4.08017	2.93226	2.19852		33.9483	3.68609	4.79331	1.58337			33.9483	3.95389	2.87876	1.42975		14.7436	3.79939	2.83591	1.33285			55.0898	5.19869	4.97397	5.87913	3.22281		55.0898	5.42646	3.83284	6.97741	3.55685		55.0898	8.33961	4.45758	5.80873	3.0324		55.0898	9.97598	5.07803	5.50972	3.50343			61.2549	4.47335
	27.3529	3.7308	2.86772	1.98444		34.3173	3.7585	4.59307	1.8331			34.3173	3.68881	3.08496	1.54895		14.9038	3.52504	3.21515	1.18885			55.6886	5.00338	4.67486	5.91655	3.24623		55.6886	4.63502	4.8305	5.71475	3.26641		55.6886	8.22189	6.25021	5.69174	3.4495		55.6886	9.70185	5.89371	5.8446	3.52625			61.9207	4.81414
	27.6471	3.45481	2.93791	2.02511		34.6863	4.46371	4.84721	1.77297			34.6863	3.65796	3.01942	1.43589		15.0641	4.43384	2.81115	1.15536			56.2874	5.42879	4.06531	5.897	3.19023		56.2874	5.34378	4.50985	5.93514	2.95998		56.2874	7.64919	5.32869	5.75355	3.04623		56.2874	10.2005	6.67434	5.89152	3.40795			62.5866	5.2744
	27.9412	3.90866	3.05203	2.01144		35.0554	4.32759	5.25112	1.78713			35.0554	3.60593	3.06863	1.42423		15.2244	3.68784	3.08691	1.23024			56.8862	4.5056	3.74957	5.88959	3.05059		56.8862	4.50985	4.93838	5.81468	2.97676		56.8862	6.6622	5.3408	5.85672	3.25869		56.8862	11.2257	6.59241	6.4532	3.23053			63.2524	5.38575
	28.2353	4.09812	3.08596	2.1085		35.4244	3.73125	4.77733	1.72857			35.4244	3.48143	2.83642	1.50464		15.3846	3.88027	3.23387	1.25256			57.485	4.96544	4.32643	6.1322	3.28945		57.485	4.83907	4.57015	5.71947	3.11179		57.485	7.11132	5.40914	5.97965	2.96842		57.485	9.09499	5.94751	6.66104	3.36404			63.9182	4.66455
	28.5294	4.05949	3.39173	2.02023		35.7934	4.42945	4.42958	1.67506			35.7934	3.92073	2.85552	1.51655		15.5449	4.28078	3.22082	1.32419			58.0838	4.80553	5.12131	6.20446	3.36417		58.0838	4.76503	5.04034	5.78524	3.28162		58.0838	10.1078	6.21384	5.55702	2.99755		58.0838	8.53564	6.0619	7.22369	3.35163			64.584	5.19162
	28.8235	3.77786	3.2986	2.08187		36.1624	3.51989	4.70372	1.59391			36.1624	4.11646	3.12978	1.46863		15.7051	3.87612	2.9944	1.34627			58.6826	5.92347	5.03409	5.66562	3.48171		58.6826	5.21957	3.56544	6.11809	2.97372		58.6826	9.99091	6.7774	5.80284	2.95295		58.6826	9.51428	5.95875	5.63645	3.29762			65.2498	5.60951
	29.1176	4.22481	2.93092	2.1067		36.5314	3.72408	4.4187	1.63123			36.5314	3.87346	2.81222	1.50134		15.8654	3.60108	3.00375	1.31267			59.2814	5.19058	4.23302	5.80211	3.68095		59.2814	4.87399	3.77003	5.82138	3.02563		59.2814	10.9524	6.66942	5.77366	3.10885		59.2814	8.53341	5.16062	5.71852	3.36803			65.9156	5.17584
	29.4118	4.06621	2.89472	2.13037		36.9004	4.35056	5.36662	1.60552			36.9004	3.88361	3.07026	1.36315		16.0256	4.34025	2.93729	1.16281			59.8802	4.65442	4.70094	6.04632	3.41722		59.8802	4.95021	3.74678	6.03108	3.09351		59.8802	9.63294	7.18823	6.30687	3.51156		59.8802	9.78538	5.65538	5.62514	3.63402			66.5814	4.96181
	29.7059	4.19754	3.28136	2.03384		37.2694	4.35392	5.17507	1.67989			37.2694	3.7122	2.91017	1.43998		16.1859	3.50165	2.94492	1.34614			60.479	5.55969	4.44706	6.29876	3.48181		60.479	4.76098	3.52634	5.32957	3.18206		60.479	10.0725	6.44269	5.85189	3.32223		60.479	9.39708	6.28343	5.56784	3.56751			67.2473	5.38229
	30	4.50373	2.96773	2.21956		37.6384	4.30697	4.71993	1.63194			37.6384	4.21326	2.85705	1.48692		16.3462	3.51803	2.96838	1.28928			61.0778	5.86306	5.1369	6.04116	3.42606		61.0778	4.38168	3.31791	6.05384	2.99861		61.0778	9.49815	6.77949	6.00713	3.45819		61.0778	9.75332	6.87584	5.59788	3.4581			67.9131	5.21263
	30.2941	3.56162	2.89363	2.12473		38.0074	4.09254	4.55076	1.60794			38.0074	3.25764	3.05489	1.3632		16.5064	3.99338	2.89789	1.26673			61.6766	6.12437	4.23624	6.06918	3.50104		61.6766	4.79273	3.9114	5.57358	3.23441		61.6766	7.6505	5.41139	6.51098	3.21754		61.6766	11.1688	6.16219	5.34851	3.71349			68.5789	5.26924
	30.5882	4.1227	2.90623	2.13114		38.3764	3.71935	4.96507	1.71028			38.3764	3.83201	3.01065	1.50061		16.6667	3.47665	2.78911	1.18943			62.2754	5.12963	4.52744	6.17892	3.41803		62.2754	4.72864	3.9475	5.51164	3.11587		62.2754	9.25314	6.61925	6.47052	3.18223		62.2754	10.5309	6.59606	5.46139	3.62446			69.2447	4.15016
	30.8824	4.00063	3.029	2.08219		38.7454	4.34943	4.7243	1.64521			38.7454	4.07002	2.88369	1.39994		16.8269	3.62029	2.90723	1.14026			62.8743	5.45003	4.83398	5.68169	3.45327		62.8743	4.88949	3.63148	5.79451	3.0159		62.8743	9.01585	7.21356	5.99824	3.17424		62.8743	8.76861	5.74015	5.63081	3.35111			69.9105	5.25481
	31.1765	3.67056	3.04218	2.0493		39.1144	4.10597	5.08791	1.66473			39.1144	3.58073	2.8685	1.35063		16.9872	4.44111	2.99326	1.26744			63.4731	5.14795	4.1917	6.36445	3.3389		63.4731	4.37088	4.14656	5.75294	2.98493		63.4731	9.66766	7.41178	6.08751	3.17775		63.4731	8.59849	6.20727	5.54955	3.33066			70.5763	5.04482
	31.4706	3.47422	2.86363	2.07792		39.4834	4.11246	4.92621	1.52416			39.4834	3.99224	3.14568	1.45281		17.1474	3.88785	2.82826	1.21685			64.0719	5.31351	5.02353	6.02476	3.24761		64.0719	4.31976	3.76773	5.51668	3.01428		64.0719	8.11007	5.78171	6.05011	2.97218		64.0719	8.93306	5.88201	5.86023	3.54512			71.2421	5.7421
	31.7647	3.45848	2.79329	2.16656		39.8524	3.46162	5.05848	1.70611			39.8524	4.58732	3.00605	1.38933		17.3077	3.66492	3.24828	1.27221			64.6707	5.73069	5.19434	5.84092	3.47224		64.6707	4.44721	4.05317	5.68501	3.03699		64.6707	9.4858	6.30885	6.00055	3.18169		64.6707	8.76784	5.46169	5.78234	3.64108			71.908	5.08462
	32.0588	4.45282	2.92694	2.04507		40.2214	3.26995	4.9351	1.60743			40.2214	4.29584	2.8984	1.38197		17.4679	3.96168	2.78628	1.19558			65.2695	6.81684	4.45501	6.1904	3.62193		65.2695	4.69881	3.05091	5.51874	3.17295		65.2695	9.00737	6.28963	5.67051	3.26888		65.2695	9.21998	5.62631	5.78554	3.4858			72.5738	4.67686
	32.3529	3.75817	3.18301	1.96684		40.5904	3.87476	4.75255	1.66358			40.5904	4.34925	3.18162	1.46214		17.6282	3.63086	3.09839	1.20743			65.8683	6.16904	4.33211	6.12808	3.64348		65.8683	4.54453	3.61483	5.86022	3.02246		65.8683	8.31599	6.27908	5.67095	2.99217		65.8683	9.82667	6.06489	5.90998	3.74383			73.2396	5.2981
	32.6471	4.05659	2.98754	2.09616		40.9594	4.29304	4.8566	1.54484			40.9594	3.63314	2.9485	1.52167		17.7885	3.72941	2.81922	1.32392			66.4671	5.80807	4.74684	6.46828	3.85022		66.4671	4.73277	3.78671	6.41196	3.06213		66.4671	8.91727	7.08781	5.54086	2.77793		66.4671	10.37	6.73693	5.81791	3.58192			73.9054	5.30357
	32.9412	4.48224	3.21379	2.04385		41.3284	3.86425	4.65864	1.61308			41.3284	3.74368	3.08158	1.45837		17.9487	3.73666	3.2264	1.20692			67.0659	5.01577	4.95556	6.02881	3.9712		67.0659	4.33449	4.12386	6.50743	3.09024		67.0659	8.04609	5.08219	5.41456	3.12924		67.0659	10.7903	8.19476	5.49001	3.56557			74.5712	5.18934
	33.2353	3.59172	3.13553	2.04226		41.6974	4.09974	5.03534	1.64902			41.6974	4.07941	3.11044	1.4597		18.109	4.14701	2.94592	1.28241			67.6647	6.03457	4.33386	5.92605	3.86861		67.6647	4.79876	4.33502	7.01687	3.06573		67.6647	8.4496	5.64462	5.49308	2.91795		67.6647	9.82023	6.90807	5.60154	3.57012			75.237	5.25825
	33.5294	4.55836	2.95512	2.16508		42.0664	3.72015	5.01314	1.54143			42.0664	3.69752	2.88876	1.43149		18.2692	3.68365	2.93754	1.22367			68.2635	6.13306	4.29387	6.1948	3.97181		68.2635	4.60322	4.04049	6.23227	3.11212		68.2635	9.52335	6.51128	5.40581	2.99639		68.2635	9.05787	6.08838	5.51319	3.60775			75.9028	5.28899
	33.8235	4.65882	3.10331	1.98748		42.4354	4.04583	5.03338	1.65048			42.4354	3.44692	2.9659	1.46733		18.4295	3.81462	2.8657	1.29261			68.8623	5.74735	4.48939	6.16899	3.9278		68.8623	4.70102	4.1039	5.87902	3.07134		68.8623	9.05235	6.53435	5.88868	3.27704		68.8623	9.75475	6.00369	5.42602	3.573			76.5687	4.97574
	34.1176	4.41551	3.16709	2.06048		42.8044	3.65198	4.59162	1.65874			42.8044	3.91044	3.23779	1.50205		18.5897	3.69041	2.91158	1.29814			69.4611	4.90302	4.32679	5.886	3.70765		69.4611	4.70552	4.92869	5.76292	3.11598		69.4611	8.57095	6.03048	5.71375	3.33815		69.4611	9.03057	5.48355	5.76928	3.52822			77.2345	4.97416
	34.4118	3.42444	2.89009	2.07162		43.1734	4.15306	4.73055	1.74066			43.1734	3.84488	2.91472	1.5206		18.75	3.86997	2.86735	1.29274			70.0599	4.77012	4.41153	5.48258	3.78529		70.0599	4.84839	6.16906	5.01865	3.08199		70.0599	10.987	6.4887	5.93917	3.22305		70.0599	9.53666	6.39213	6.16904	3.48857			77.9003	4.95666
	34.7059	4.35532	2.88471	2.1913		43.5424	4.00145	5.22111	1.77673			43.5424	3.31916	3.10033	1.36558		18.9103	3.47413	2.97415	1.23281			70.6587	4.63801	5.12131	6.23131	3.65345		70.6587	4.80928	5.09867	5.61565	3.41139		70.6587	9.43066	5.6987	5.90005	2.94884		70.6587	10.0612	5.83343	5.48022	3.74564			78.5661	4.95283
	35	4.67269	2.98968	2.21902		43.9114	4.21471	5.18313	1.75947			43.9114	3.85793	2.79267	1.42046		19.0705	3.39411	2.90743	1.28374			71.2575	5.08425	4.34878	6.10892	3.70459		71.2575	4.58956	3.82131	5.62139	2.96462		71.2575	9.42143	6.07318	5.70302	2.72461		71.2575	10.0233	5.9626	6.10946	3.86808			79.2319	4.87518
	35.2941	3.99164	2.84812	2.30647		44.2804	3.99779	5.01822	1.53129			44.2804	3.61361	2.98271	1.45681		19.2308	3.67291	3.30518	1.208			71.8563	5.06387	4.76319	6.01356	3.67092		71.8563	4.66298	5.883	5.78932	3.09781		71.8563	10.4929	5.89637	5.91973	3.09275		71.8563	11.1336	5.81067	5.67294	4.00795			79.8977	5.48932
	35.5882	3.43444	2.75957	2.15244		44.6494	3.55878	5.19967	1.68823			44.6494	3.97764	3.13519	1.47009		19.391	3.32487	3.08998	1.24816			72.4551	5.27792	4.13764	6.0115	3.78698		72.4551	4.6791	3.92064	5.64305	3.055		72.4551	10.5089	6.56656	5.49838	3.05461		72.4551	9.86203	5.07145	5.70863	3.65392			80.5635	5.37976
	35.8824	3.43052	3.04861	2.40583		45.0185	4.57317	5.24493	1.70045			45.0185	3.83802	3.12131	1.42498		19.5513	3.4728	2.92905	1.20571			73.0539	5.85269	4.85897	6.55471	3.97029		73.0539	3.87907	5.58542	5.32354	3.13102		73.0539	9.79463	4.92371	5.66609	2.96627		73.0539	9.79227	5.54278	5.72801	3.74365			81.2294	5.04805
	36.1765	3.61529	3.28614	2.1818		45.3875	3.85479	5.13867	1.67783			45.3875	3.54767	2.92913	1.5601		19.7115	3.63006	2.86076	1.27941			73.6527	6.00418	5.46514	5.93591	4.00053		73.6527	5.93285	5.65782	5.20893	3.01385		73.6527	10.5122	8.02799	5.61173	2.97281		73.6527	10.5672	5.69862	5.57196	3.44665			81.8952	4.85644
	36.4706	4.19214	3.08521	2.22315		45.7565	4.99052	4.90919	1.62267			45.7565	3.65062	2.84652	1.48885		19.8718	4.11194	2.81575	1.23338			74.2515	4.80385	4.76518	6.13921	4.07574		74.2515	5.98736	3.80267	5.3933	2.97186		74.2515	10.8012	7.11836	5.95925	3.15474		74.2515	10.3578	5.09777	5.86416	3.59327			82.561	5.22788
	36.7647	3.53838	3.04475	2.19673		46.1255	4.77664	2.91567	1.77088			46.1255	3.54636	2.99625	1.55078		20.0321	4.46635	3.62769	1.42032			74.8503	5.46276	4.46462	5.83	4.04126		74.8503	5.63757	4.8981	5.17744	2.87129		74.8503	9.58263	5.67708	6.07418	3.09178		74.8503	10.744	5.47443	5.31619	3.8564			83.2268	5.0151
	37.0588	3.8305	3.01398	1.99888		46.4945	4.25497	4.58519	1.71233			46.4945	3.85495	2.90157	1.57695		20.1923	4.279	2.99417	1.34721			75.4491	4.99479	4.66494	6.1404	4.15568		75.4491	5.69138	4.6852	5.30037	3.14527		75.4491	9.59243	5.56414	5.72377	2.83624		75.4491	8.77178	5.63081	5.8363	3.89112			83.8926	5.31536
	37.3529	4.21875	2.98234	2.13482		46.8635	3.77543	5.0579	1.72177			46.8635	3.54648	3.40202	1.47095		20.3526	3.46404	2.89009	1.33036			76.0479	4.90696	4.58354	5.98295	4.05899		76.0479	5.80548	3.92856	5.17059	3.15017		76.0479	9.22669	5.01117	5.55251	3.16419		76.0479	10.4319	6.73035	5.48421	3.75847			84.5584	5.43737
	37.6471	4.16323	2.85745	2.04237		47.2325	3.58973	5.06125	1.6497			47.2325	3.77246	2.96789	1.54922		20.5128	3.26381	2.89468	1.26884			76.6467	5.69123	4.34342	6.07185	3.9046		76.6467	5.96323	4.06036	5.74925	3.01617		76.6467	8.9029	6.05653	5.84962	3.10636		76.6467	10.0336	7.02188	5.58256	3.76295			85.2242	4.94505
	37.9412	3.85476	2.82409	1.95157		47.6015	3.62949	5.01789	1.89059			47.6015	4.25637	3.3146	1.63222		20.6731	4.14912	2.8801	1.24884			77.2455	5.30964	4.84676	6.34704	3.90831		77.2455	4.95232	6.4122	5.448	3.07023		77.2455	10.7946	6.38131	5.6868	2.98583		77.2455	10.3185	6.96558	5.67276	3.70607			85.8901	5.53005
	38.2353	4.18488	3.06436	2.1255		47.9705	4.26949	6.2953	1.65095			47.9705	3.8632	3.09407	1.5319		20.8333	4.20317	2.79006	1.3815			77.8443	5.8831	4.12907	6.12482	3.90103		77.8443	5.18733	5.02895	5.59876	2.88901		77.8443	9.755	7.38945	5.76997	2.84846		77.8443	10.6927	6.60843	5.86876	3.76288			86.5559	5.01457
	38.5294	3.88107	2.94864	2.12179		48.3395	4.21019	5.72811	1.76841			48.3395	3.95104	2.80872	1.52451		20.9936	3.87507	3.1697	1.39981			78.4431	5.35886	4.62852	6.0581	3.97198		78.4431	6.07117	4.93154	5.7188	3.16497		78.4431	9.78612	6.07614	5.97849	2.86534		78.4431	10.1651	6.77864	5.80591	3.84147			87.2217	5.00191
	38.8235	4.02512	2.85838	1.98189		48.7085	3.48471	2.98678	1.70404			48.7085	3.87878	2.91339	1.52688		21.1538	3.31812	4.9632	1.19903			79.0419	5.64393	4.24775	5.98316	4.02149		79.0419	4.80971	4.70317	5.59973	3.0943		79.0419	10.2443	6.91106	6.04882	3.0433		79.0419	10.4441	5.5884	5.98158	3.8841			87.8875	5.86303
	39.1176	3.66174	2.73848	1.9507		49.0775	3.68091	3.4228	1.80157			49.0775	4.01349	2.9597	1.60329		21.3141	3.57714	3.44415	1.28561			79.6407	6.00199	4.68387	6.07871	4.0005		79.6407	4.74005	5.42101	5.237	2.97032		79.6407	9.40378	5.83451	5.99976	3.03422		79.6407	10.0243	4.87921	5.93969	4.02292			88.5533	5.26964
	39.4118	3.45694	3.23981	2.15287		49.4465	3.81873	2.91828	1.72806			49.4465	3.57593	2.76778	1.63843		21.4744	3.70857	2.98588	1.3846			80.2395	5.22094	4.83176	5.9793	4.14482		80.2395	5.51009	6.55814	5.49083	2.86573		80.2395	11.9137	7.23481	5.63045	2.81596		80.2395	12.0137	6.89915	5.51557	3.70841			89.2191	5.34978
	39.7059	4.0152	3.23938	2.17186		49.8155	3.82916	2.88435	1.79294			49.8155	3.50778	3.26476	1.58153		21.6346	4.59436	2.78397	1.41471			80.8383	5.21725	4.89411	5.96158	4.01846		80.8383	4.33256	5.34456	5.77505	3.01859		80.8383	10.0565	7.70955	5.6604	2.93545		80.8383	9.72336	6.38614	5.65378	3.74864			89.8849	5.14662
	40	3.33243	3.16577	2.20624		50.1845	3.46051	5.33145	1.7516			50.1845	3.6316	3.04448	1.71413		21.7949	3.87325	2.73053	1.29365			81.4371	5.66746	4.87924	5.74642	4.00505		81.4371	5.91305	3.93294	5.73709	3.12657		81.4371	9.52988	6.71029	6.07356	2.67552		81.4371	10.3903	6.60606	5.62847	4.06315			90.5508	5.40291
	40.2941	3.53508	2.9337	2.24798		50.5535	3.9893	5.11255	1.70662			50.5535	3.64935	2.90422	1.72393		21.9551	4.04263	2.86168	1.38497			82.0359	4.6096	4.99616	6.0299	3.95635		82.0359	4.50741	5.78145	6.17358	3.14443		82.0359	10.7887	6.61959	5.8896	2.75654		82.0359	9.68779	5.63369	5.27788	3.92381			91.2166	4.89406
	40.5882	3.68114	3.06256	2.11362		50.9225	3.55879	2.92263	1.74788			50.9225	4.08507	2.93495	1.75027		22.1154	4.31055	2.88925	1.38563			82.6347	4.79397	4.85986	5.89021	3.90866		82.6347	4.73842	5.04024	5.06355	2.94004		82.6347	9.28186	6.2497	6.1189	2.91838		82.6347	9.69746	5.51063	5.78188	3.87001			91.8824	4.68694
	40.8824	4.11648	3.03038	2.19522		51.2915	3.71102	3.07524	1.72235			51.2915	4.01741	2.82898	1.5475		22.2756	3.82153	2.9671	1.35804			83.2335	5.40977	3.88882	5.70321	3.83443		83.2335	5.48552	4.37329	5.10599	3.14566		83.2335	9.68135	6.37116	5.49068	3.0689		83.2335	11.6655	5.81281	5.67225	4.05902			92.5482	5.52341
	41.1765	3.64838	2.84307	2.12477		51.6605	3.79264	2.90815	1.60698			51.6605	3.87496	2.73608	1.64506		22.4359	3.70029	2.89576	1.42118			83.8323	6.18968	4.68274	5.88907	3.9294		83.8323	4.1739	3.52677	5.48518	3.21414		83.8323	10.6184	6.8797	6.0074	2.97735		83.8323	10.9855	5.39988	5.90372	3.85715			93.214	4.87196
	41.4706	3.70665	3.23739	2.12072		52.0295	4.03402	3.09836	1.67881			52.0295	3.5898	2.81045	1.67299		22.5962	4.09416	3.07525	1.4851			84.4311	5.5112	3.89183	5.81003	4.0618		84.4311	3.77356	3.42703	5.33621	3.20414		84.4311	8.90607	6.79372	5.76421	2.91071		84.4311	9.44638	5.7409	5.25343	3.757			93.8798	5.03686
	41.7647	3.81325	2.87181	2.05351		52.3985	4.17624	3.5799	1.72664			52.3985	3.61761	2.77217	1.69053		22.7564	3.98399	3.02567	1.52795			85.0299	5.12791	3.97229	5.87282	4.03326		85.0299	4.66848	4.6571	5.42979	3.1065		85.0299	9.95771	7.49905	6.14226	3.16167		85.0299	10.8032	6.82521	5.66538	4.04673			94.5456	5.39295
	42.0588	4.04647	3.0572	2.36274		52.7675	4.25435	3.91453	1.76638			52.7675	3.60677	3.00752	1.55256		22.9167	3.93993	2.89132	1.34451			85.6287	4.85173	5.10461	6.00157	3.88298		85.6287	5.06105	3.98152	5.49342	3.02325		85.6287	11.3237	6.22736	6.04402	2.85128		85.6287	10.9802	6.03211	5.58969	4.02832			95.2115	4.95772
	42.3529	3.38873	3.04534	2.17672		53.1365	3.55058	3.14212	1.8146			53.1365	3.37597	2.94804	1.59417		23.0769	3.91982	3.00489	1.37151			86.2275	5.09528	5.19912	5.93351	4.11325		86.2275	5.01705	3.5981	5.47412	2.98549		86.2275	10.9804	7.40918	5.63544	3.01076		86.2275	11.224	5.63481	5.42799	3.8228			95.8773	6.54874
	42.6471	3.7379	2.96745	2.21481		53.5055	4.76742	3.12863	1.69181			53.5055	3.79322	3.3314	1.53355		23.2372	3.58669	3.01059	1.23141			86.8263	5.65769	3.98975	5.98705	4.04282		86.8263	4.84816	5.40394	5.50717	2.90835		86.8263	11.6361	6.99423	6.03755	2.72422		86.8263	11.749	6.07457	5.40866	3.92756			96.5431	5.25072
	42.9412	3.59858	2.92735	2.3357		53.8745	3.87295	3.54121	1.74454			53.8745	3.75581	2.79124	1.52243		23.3974	3.40776	3.11511	1.34805			87.4251	4.97362	4.62581	5.81599	4.15491		87.4251	4.76344	4.80828	5.53075	3.14602		87.4251	11.1459	6.8411	6.00925	3.0772		87.4251	11.6828	5.88536	5.49722	4.0933			97.2089	5.34515
	43.2353	4.60512	3.19476	2.29722		54.2435	4.09953	3.09222	1.79608			54.2435	3.83797	3.16588	1.45795		23.5577	3.86452	2.88364	1.33692			88.024	5.01766	4.41841	5.83536	4.165		88.024	4.67563	4.83028	5.62868	3.05106		88.024	9.93624	6.17369	6.04294	3.08276		88.024	12.6318	4.97762	7.21165	3.76992			97.8747	5.30605
	43.5294	4.14261	3.19946	2.40504		54.6125	3.87916	2.8273	1.68081			54.6125	4.18579	3.32055	1.39005		23.7179	3.58412	3.18091	1.2904			88.6228	5.4243	4.32406	6.01782	4.14913		88.6228	4.90565	3.5567	5.21573	3.0077		88.6228	9.43278	5.88175	5.71449	2.85239		88.6228	10.6142	5.23225	7.47647	3.87657			98.5405	4.78677
	43.8235	4.68212	2.97278	2.3971		54.9815	3.64806	3.83782	1.75217			54.9815	3.55098	2.80421	1.52683		23.8782	4.4656	2.93702	1.34615			89.2216	4.69201	4.39339	5.53623	4.16412		89.2216	4.50025	4.62	5.8708	2.86019		89.2216	10.3401	5.77881	5.5378	2.98859		89.2216	10.9844	6.88756	7.38494	4.00159			99.2063	5.06737
	44.1176	3.74245	2.85365	2.48013		55.3506	3.34136	3.57942	1.7067			55.3506	4.50517	3.00773	1.53272		24.0385	3.85194	3.00444	1.52089			89.8204	5.75172	5.08568	5.71488	3.98595		89.8204	4.90666	4.47909	6.31534	2.76281		89.8204	10.041	4.86576	5.63847	2.92105		89.8204	11.4817	5.63277	7.68594	4.02107			99.8722	4.62499
	44.4118	4.38818	2.79918	2.43518		55.7196	3.52524	3.15436	1.73681			55.7196	3.64794	2.85279	1.53182		24.1987	3.86063	3.05854	1.37437			90.4192	5.37842	4.99378	6.09597	4.06597		90.4192	4.48752	4.22097	5.17319	3.12718		90.4192	10.1855	4.32751	5.73952	2.90476		90.4192	11.5512	6.13934	6.77891	3.85537			100.538	4.90704
	44.7059	4.05904	2.92967	2.45717		56.0886	3.59012	3.12556	1.85953			56.0886	4.39018	3.01314	1.6312		24.359	3.79415	2.97229	1.40373			91.018	5.21435	4.20573	5.88007	4.04976		91.018	5.16735	5.0173	5.331	3.12846		91.018	11.6414	5.2774	5.22977	3.2099		91.018	11.7193	6.02264	7.17995	4.17265			101.204	5.34191
	45	4.62204	3.12731	2.44134		56.4576	3.66168	3.08498	1.87132			56.4576	4.29776	3.05773	1.59816		24.5192	3.64562	2.88302	1.50169			91.6168	4.77392	4.7439	5.9715	4.14718		91.6168	4.44511	4.69649	6.19893	2.94273		91.6168	12.1569	4.82556	5.60352	3.14705		91.6168	12.5234	5.69512	7.26029	4.03378			101.87	5.2983
	45.2941	3.7601	3.00772	2.43735		56.8266	4.38224	3.04675	1.8159			56.8266	3.82985	3.8478	1.52065		24.6795	4.782	2.94852	1.46379			92.2156	5.98893	3.31154	6.02015	4.08429		92.2156	4.90295	5.94971	6.06609	2.93388		92.2156	10.3149	5.08921	5.84782	3.04668		92.2156	12.8832	5.03644	6.92737	3.96675			102.535	5.1752
	45.5882	3.33149	3.00688	2.33837		57.1956	3.56999	2.96979	1.71358			57.1956	3.88894	3.29841	1.6403		24.8397	4.07307	2.96322	1.39551			92.8144	5.38272	4.58255	5.99182	3.89637		92.8144	4.33317	5.16415	5.82531	3.04853		92.8144	10.1778	5.84992	6.17052	3.02518		92.8144	10.9333	6.78897	6.79402	3.98			103.201	5.32017
	45.8824	4.33154	3.12227	2.3297		57.5646	3.20044	2.88783	1.76404			57.5646	4.16712	3.1875	1.53468		25	4.05718	2.83952	1.43198			93.4132	4.76505	3.7235	5.83147	4.17703		93.4132	4.71777	5.112	5.35006	2.95623		93.4132	9.58389	6.3135	5.97784	3.21005		93.4132	11.9092	5.0435	7.47589	4.13978			103.867	5.72191
	46.1765	4.44691	3.28606	2.49452		57.9336	4.13581	3.01114	1.71503			57.9336	3.79609	3.20659	1.60029		25.1603	3.64731	2.902	1.32686			94.012	5.65198	4.34282	6.0489	4.25843		94.012	5.98083	5.98667	5.91715	3.17946		94.012	11.0484	7.2855	5.6661	3.14192		94.012	16.951	8.54564	79.2233	3.88826			104.533	4.97208
	46.4706	3.89898	2.83668	2.34273		58.3026	4.65624	2.94367	1.62416			58.3026	3.42613	3.35141	1.60918		25.3205	4.3309	2.99557	1.4298			94.6108	5.46124	4.9538	5.8971	4.11791		94.6108	4.61809	6.06955	6.04164	2.95498		94.6108	11.2528	4.91395	5.49844	3.10921		94.6108	16.2251	8.40078	82.8212	3.96025			105.199	4.60109
	46.7647	3.8958	3.00546	2.399		58.6716	3.78177	3.09254	1.69594			58.6716	4.19459	2.98313	1.65546		25.4808	4.3267	3.00033	1.27946			95.2096	6.3074	4.64457	5.62585	3.80783		95.2096	4.29135	5.63116	5.91593	2.96222		95.2096	9.57938	5.24138	5.60632	3.2724		95.2096	16.8554	7.79178	90.1234	3.88433			105.864	4.87398
	47.0588	3.8577	3.11038	2.48791		59.0406	4.1088	2.90361	1.69926			59.0406	3.26282	2.86534	1.56354		25.641	4.17432	2.7959	1.48022			95.8084	5.46046	5.56861	6.14147	3.83336		95.8084	5.9786	5.68355	5.84824	3.09588		95.8084	10.7932	4.76402	5.59889	2.95858		95.8084	16.045	8.49994	76.9892	3.94291			106.53	4.93779
	47.3529	3.5731	3.06239	2.34052		59.4096	3.8569	3.14221	1.67699			59.4096	4.03155	2.91831	1.48211		25.8013	4.15615	2.87881	1.41469			96.4072	4.72726	5.16438	6.00025	3.96129		96.4072	5.1342	5.58732	5.81684	3.15363		96.4072	10.2517	5.0835	5.6937	3.23276		96.4072	18.2161	9.07098	60.2407	4.0344			107.196	5.07836
	47.6471	3.49712	3.01645	2.41801		59.7786	3.71163	3.2299	1.76843			59.7786	3.62077	3.18437	1.69426		25.9615	3.76161	2.87529	1.44741			97.006	5.07824	5.01069	6.04844	3.89488		97.006	4.77249	5.92953	7.04811	3.03049		97.006	10.3816	4.45059	5.57655	3.27182		97.006	18.6167	7.96196	65.0514	3.73521			107.862	5.61307
	47.9412	3.54705	3.18789	2.51031		60.1476	3.72022	2.96798	1.7212			60.1476	3.93007	3.14723	1.64273		26.1218	4.27313	3.06735	1.32181			97.6048	4.85626	4.86166	5.5174	3.94923		97.6048	5.12391	5.13966	5.9095	3.05389		97.6048	11.9595	5.95231	5.60737	3.03179		97.6048	18.3335	9.45289	57.2385	3.84111			108.528	4.85664
	48.2353	4.50747	2.81297	2.42315		60.5166	3.41957	3.20419	1.7196			60.5166	3.43868	3.05736	1.76779		26.2821	3.71363	2.77461	1.42349			98.2036	4.65618	4.26429	5.84005	3.74608		98.2036	4.7312	5.20047	5.85445	3.14716		98.2036	10.3698	5.4968	5.7862	3.40483		98.2036	17.8503	9.06442	63.4513	4.10479			109.194	5.26745
	48.5294	4.31178	2.93793	2.38804		60.8856	4.24595	2.76196	1.88507			60.8856	3.69636	3.0392	1.69881		26.4423	3.95792	2.98553	1.33244			98.8024	6.13599	4.50757	5.74747	3.98342		98.8024	4.69567	5.15918	5.9001	3.35569		98.8024	10.9957	5.02626	5.74097	3.02388		98.8024	17.6263	8.92428	68.2447	3.8487			109.859	5.15254
	48.8235	4.67216	2.67537	2.41224		61.2546	4.00718	3.09176	1.8874			61.2546	3.52326	3.41808	1.65784		26.6026	3.92881	3.15919	1.36745			99.4012	5.26011	4.93605	5.64769	3.77002		99.4012	4.56836	4.57367	5.84377	3.20652		99.4012	9.77074	4.77019	5.82064	3.05527		99.4012	19.469	9.75342	67.9827	4.02865			110.525	4.9379
	49.1176	4.4916	3.05277	2.33025		61.6236	3.75015	3.46054	1.74693			61.6236	3.48294	2.84257	1.74117		26.7628	4.56258	3.06531	1.38891			100	5.66757	4.12319	6.07252	3.80391		100	4.79549	4.82222	6.70128	3.08256		100	10.5765	4.12315	5.68577	3.91215		100	16.7732	8.14346	69.1707	3.97309			111.191	4.83484
	49.4118	3.34067	3.36664	2.44936		61.9926	4.12001	2.97187	1.6402			61.9926	3.97141	2.84867	1.67232		26.9231	3.90719	3.1844	1.3924			100.599	5.40626	4.91185	5.99456	3.93403		100.599	5.32283	5.50478	7.81542	3.33951		100.599	10.4772	5.03188	5.6738	3.5835		100.599	16.1879	8.66513	71.6245	4.23756			111.857	4.88806
	49.7059	4.85033	2.97802	2.43679		62.3616	3.65433	3.77218	1.72754			62.3616	3.65601	3.02483	1.74068		27.0833	4.02349	3.01754	1.34597			101.198	5.02623	4.77699	6.03557	3.92729		101.198	3.81046	4.37709	5.7064	3.0736		101.198	11.0201	5.63182	6.08186	3.2952		101.198	16.4896	8.97834	62.9143	4.12979			112.523	5.52818
	50	4.56034	3.02629	2.52433		62.7306	3.85538	2.9876	1.6599			62.7306	3.28804	2.91333	1.58521		27.2436	4.03858	2.8812	1.50858			101.796	5.29907	5.10397	5.59344	3.80444		101.796	5.27131	5.09814	6.66333	3.29234		101.796	10.9803	6.95756	5.84569	3.32143		101.796	16.8267	9.15482	56.7989	4.11827			113.188	5.29076
	50.2941	4.58677	2.98747	2.6059		63.0996	4.20104	2.96066	1.83498			63.0996	3.4943	3.30139	1.70403		27.4038	3.69516	2.94831	1.36604			102.395	5.33641	6.75288	5.3689	3.65037		102.395	4.99171	4.21189	7.21408	3.15327		102.395	11.4011	7.4569	5.52205	3.22771		102.395	16.9783	8.72123	45.4375	4.01992			113.854	5.01622
	50.5882	4.2534	3.40809	2.46855		63.4686	3.88413	2.79181	1.73214			63.4686	3.83784	3.00115	1.69641		27.5641	3.24627	3.06853	1.43931			102.994	5.71456	7.84817	5.5404	3.59849		102.994	4.73723	4.64701	8.21806	3.05566		102.994	11.3729	7.28881	7.49711	3.37883		102.994	17.537	8.90206	49.9459	4.04246			114.52	5.19766
	50.8824	4.39035	2.92853	2.44256		63.8376	4.24632	3.44733	1.81253			63.8376	3.60272	3.2988	1.76053		27.7244	4.37521	3.1169	1.39111			103.593	5.93835	7.73072	5.40755	3.40802		103.593	4.32132	3.61603	5.98785	3.24303		103.593	10.4242	6.38943	5.79859	3.40654		103.593	17.0165	8.24006	38.3569	3.94053			115.186	5.17964
	51.1765	3.65619	2.93906	2.41845		64.2066	3.81345	3.15204	1.89858			64.2066	3.86203	2.89908	1.70592		27.8846	4.00946	2.8486	1.48261			104.192	5.05734	7.49872	5.52028	3.91091		104.192	4.50455	4.51898	7.53908	3.18454		104.192	10.2973	7.09792	5.74889	3.12361		104.192	16.3713	8.05617	37.2733	4.05719			115.852	4.97082
	51.4706	3.85589	3.36056	2.38813		64.5756	3.74869	2.90179	1.75485			64.5756	3.68583	2.80881	1.55842		28.0449	4.31229	2.97253	1.37998			104.79	4.72804	7.3133	5.39046	3.69001		104.79	4.21151	4.54976	6.28697	3.2421		104.79	11.7286	7.08375	5.80264	3.44067		104.79	14.8004	8.48188	37.2257	4.17051			116.518	5.39055
	51.7647	4.18906	2.93933	2.46034		64.9446	3.94431	3.31825	1.67612			64.9446	3.36298	3.15768	1.60541		28.2051	4.86756	2.84834	1.3988			105.389	4.45309	7.26619	5.75465	3.99587		105.389	4.61887	4.87125	6.73715	3.04926		105.389	9.4146	4.73292	5.67149	3.24761		105.389	15.7812	8.32818	28.103	4.04013			117.183	5.44999
	52.0588	4.09169	2.87196	2.67728		65.3137	3.87039	3.71497	1.69043			65.3137	3.40819	2.94208	1.7339		28.3654	3.91757	3.03982	1.45864			105.988	5.89277	6.64048	5.71274	3.87149		105.988	4.26625	4.94059	6.49421	3.04598		105.988	9.58969	5.38164	5.48485	3.33499		105.988	15.9853	7.3481	23.5608	3.89404			117.849	5.294
	52.3529	4.47972	3.43124	2.48588		65.6827	3.81898	3.0351	1.49821			65.6827	3.56763	3.49002	1.59038		28.5256	4.33902	3.21231	1.38932			106.587	5.80276	6.76999	5.40527	3.86581		106.587	5.01136	4.47905	5.69878	3.09638		106.587	10.6046	5.05053	5.87866	3.17263		106.587	16.3046	6.63976	20.3132	4.09909			118.515	5.39886
	52.6471	3.80471	2.89823	2.393		66.0517	3.62882	2.95267	1.72262			66.0517	3.65918	3.65263	1.55828		28.6859	4.1389	2.96953	1.46451			107.186	4.80037	6.44445	5.76195	3.65397		107.186	5.0377	5.14434	6.00782	3.11481		107.186	10.012	5.13481	5.84325	3.44846		107.186	16.0318	7.92555	22.6627	4.01692			119.181	5.44699
	52.9412	4.45115	2.72981	2.48724		66.4207	3.70557	2.9958	1.71509			66.4207	3.81173	3.26165	1.65243		28.8462	3.66062	2.99825	1.50249			107.784	5.11762	6.34532	5.86105	3.81375		107.784	8.67737	6.34061	5.66031	3.42071		107.784	10.3103	4.76863	5.82613	3.45092		107.784	16.0995	8.24902	23.2907	4.1929			119.847	5.51899
	53.2353	3.83614	2.87473	2.47766		66.7897	3.34937	3.82822	1.89929			66.7897	3.72787	2.9975	1.68728		29.0064	3.97453	3.3174	1.39629			108.383	5.83669	7.15216	5.69167	3.76275		108.383	4.69658	5.03628	5.38728	3.0082		108.383	10.9667	5.38573	5.75496	3.19486		108.383	16.1989	8.22601	30.6181	4.16573			120.512	5.00167
	53.5294	4.10535	3.27478	2.38325		67.1587	3.60141	3.56936	1.84919			67.1587	3.58232	2.89114	1.60014		29.1667	3.91382	3.01889	1.38055			108.982	5.94015	6.62676	5.37855	3.68489		108.982	4.60096	4.31534	5.87357	3.13735		108.982	9.40443	5.03837	9.89533	3.46938		108.982	16.9001	8.38125	25.9774	4.05652			121.178	5.10865
	53.8235	4.02772	3.41124	2.46971		67.5277	3.40147	2.98213	1.86163			67.5277	3.82614	3.13135	1.64573		29.3269	3.63622	2.98487	1.24603			109.581	6.43538	6.88162	6.10915	3.9702		109.581	4.72098	5.57302	6.54474	3.17514		109.581	11.1694	5.56932	9.76765	3.24818		109.581	16.6619	9.14303	30.6146	4.14655			121.844	5.28651
	54.1176	4.21911	2.98214	2.38284		67.8967	3.73473	3.16344	1.8286			67.8967	3.67852	3.04279	1.6662		29.4872	3.88188	2.91048	1.39094			110.18	4.84963	6.35393	5.91758	3.88387		110.18	5.13973	4.19745	6.44317	3.54937		110.18	10.979	5.43541	10.08	3.35019		110.18	16.9296	8.26694	32.5455	3.98877			122.51	5.18303
	54.4118	3.97914	3.14202	2.43478		68.2657	3.81882	3.28969	1.94693			68.2657	3.73658	3.03235	1.63938		29.6474	3.63953	3.029	1.3332			110.778	5.70712	6.804	5.52338	3.64413		110.778	5.65529	4.66556	7.40634	3.55678		110.778	10.6411	4.53253	7.04409	3.27676		110.778	16.1873	8.1893	30.7628	4.13793			123.176	5.0305
	54.7059	3.94532	3.07149	2.42779		68.6347	3.32466	3.20057	1.66925			68.6347	3.61012	3.08617	1.67704		29.8077	3.98974	2.83026	1.38103			111.377	5.30715	6.81908	5.82188	3.87101		111.377	4.96455	4.83317	7.61016	2.9292		111.377	9.82302	5.26763	8.76266	3.42797		111.377	16.8109	8.75469	30.6077	4.09936			123.841	5.04607
	55	3.3612	2.9402	2.31944		69.0037	3.71794	3.56848	1.77979			69.0037	4.05817	2.97264	1.6926		29.9679	3.49763	2.88299	1.42824			111.976	6.52243	6.80337	6.68292	3.94855		111.976	5.87777	5.32975	6.84192	3.26219		111.976	9.42518	5.55901	8.1591	3.60962		111.976	14.6467	7.40828	26.6861	4.19473			124.507	4.84682
	55.2941	4.19308	3.23267	2.30693		69.3727	3.30574	3.05374	1.6304			69.3727	3.3104	2.89719	1.60504		30.1282	4.30848	2.98135	1.37736			112.575	5.03319	6.5072	6.29158	3.91462		112.575	4.9968	5.43071	6.6845	3.30785		112.575	10.2433	4.80451	13.9931	3.14253		112.575	16.0142	8.3184	28.7726	4.21383			125.173	4.8801
	55.5882	4.27029	2.80235	2.35138		69.7417	3.40229	2.87396	1.80499			69.7417	3.9825	3.28823	1.54909		30.2885	3.83176	2.86499	1.49203			113.174	5.79287	7.18955	5.9536	3.82074		113.174	4.73415	5.17553	6.99253	3.34623		113.174	11.3911	6.03393	14.3499	3.35855		113.174	16.679	8.48863	30.4402	3.95598			125.839	5.71493
	55.8824	3.8493	3.05727	2.36058		70.1107	3.79971	3.03377	1.76759			70.1107	3.59847	2.77538	1.71794		30.4487	4.25131	2.71786	1.46428			113.772	5.85345	5.17701	5.59365	3.88432		113.772	5.72281	4.1836	6.75516	3.2471		113.772	11.5181	5.1207	16.2604	3.33345		113.772	16.0355	8.65659	35.8742	4.23562			126.505	5.82374
	56.1765	4.69861	2.98785	2.22771		70.4797	3.93787	2.79547	1.75674			70.4797	3.88973	3.0432	1.58525		30.609	4.07301	3.15747	1.43685			114.371	5.79093	8.1891	5.74197	3.66825		114.371	5.03145	3.88454	5.97522	3.32626		114.371	10.2964	7.2359	19.9741	3.25936		114.371	15.4933	8.19717	31.3202	4.26371			127.171	5.57611
	56.4706	4.35296	3.17625	2.38015		70.8487	3.49163	3.07542	1.86469			70.8487	3.94627	2.90245	1.50911		30.7692	4.30653	2.68756	1.53399			114.97	5.54504	8.63601	5.47861	3.66062		114.97	5.09269	4.4399	5.70559	3.23021		114.97	10.5971	6.46065	31.9107	3.11747		114.97	16.8219	8.29418	40.2619	3.88552			127.836	4.58832
	56.7647	3.83195	3.15494	2.34034		71.2177	3.72147	3.17247	1.77282			71.2177	3.2452	3.37959	1.6022		30.9295	4.3859	2.80318	1.28567			115.569	5.22339	8.51999	5.63676	3.81943		115.569	4.88851	4.44685	6.02439	3.28964		115.569	10.751	6.57878	42.3834	3.16165		115.569	17.3847	7.99942	42.9336	3.82664			128.502	5.87533
	57.0588	3.92923	2.92941	2.25185		71.5867	3.38857	2.98646	1.67			71.5867	3.66399	3.22447	1.65235		31.0897	3.69189	3.03241	1.4725			116.168	4.95661	7.73769	5.80936	3.72172		116.168	5.31178	4.05621	5.45133	3.22569		116.168	9.91528	6.77778	46.6331	3.22917		116.168	15.4185	8.51595	36.0286	4.16022			129.168	5.38354
	57.3529	4.11973	2.79797	2.35543		71.9557	3.61416	2.97828	1.64365			71.9557	3.25331	3.07355	1.58944		31.25	3.94081	2.76221	1.3459			116.766	5.96855	8.48994	5.25263	3.98063		116.766	5.59289	5.24532	5.96965	3.27421		116.766	9.82813	6.43786	58.8698	3.12505		116.766	16.0778	8.10372	43.9347	4.1381			129.834	5.28845
	57.6471	3.94518	2.7813	2.47471		72.3247	3.67053	3.2444	1.73254			72.3247	3.86547	2.87718	1.64962		31.4103	4.05789	2.79547	1.48918			117.365	5.99999	7.10684	5.23105	3.82401		117.365	5.55819	4.47926	6.43831	3.34734		117.365	9.76082	5.68477	64.2642	3.05105		117.365	18.4414	9.28713	54.6754	4.18235			130.5	4.95146
	57.9412	5.30785	2.8904	2.25559		72.6937	3.58621	2.98158	1.64434			72.6937	3.31738	3.10298	1.60889		31.5705	3.40381	3.09046	1.4319			117.964	4.76798	6.48882	5.78617	3.7874		117.964	5.52423	5.0613	5.82099	3.29329		117.964	10.4375	6.48852	53.0321	3.70915		117.964	16.336	8.98981	49.5484	4.14291			131.165	5.08276
	58.2353	5.13215	3.03407	2.28388		73.0627	4.1799	2.94866	1.742			73.0627	3.30977	2.88616	1.6625		31.7308	3.80254	3.02863	1.38681			118.563	5.10101	6.4922	5.63338	3.77147		118.563	6.0262	5.27124	6.77379	3.0662		118.563	10.0743	7.05332	52.3071	3.07947		118.563	17.1591	8.56967	52.3072	4.23482			131.831	5.01825
	58.5294	3.80252	2.87705	2.15871		73.4317	4.13257	3.8732	1.68378			73.4317	3.88312	3.23647	1.61525		31.891	3.8218	3.27341	1.42664			119.162	5.75324	6.74472	6.09987	3.62862		119.162	4.88446	4.07279	6.84269	3.34061		119.162	9.28749	6.8019	41.182	3.49151		119.162	15.7936	8.03576	48.4038	4.26906			132.497	5.88115
	58.8235	4.41447	2.90553	2.37881		73.8007	3.69414	2.93116	1.67862			73.8007	3.27995	2.88377	1.63222		32.0513	3.67016	2.92164	1.41982			119.76	4.78409	7.25029	5.9761	3.84971		119.76	4.59197	4.21014	7.98955	3.17359		119.76	9.50947	6.27649	46.6608	3.3869		119.76	16.7256	8.05176	48.8801	4.16492			133.163	4.82482
	59.1176	5.28274	2.85272	2.31087		74.1697	3.90752	2.74264	1.72667			74.1697	3.60662	2.79788	1.50248		32.2115	3.51508	2.96372	1.4021			120.359	5.71435	7.12507	5.77807	3.95293		120.359	5.09399	4.38307	6.13622	3.31839		120.359	9.21801	4.49651	47.7105	3.5174		120.359	16.9919	8.51472	49.2083	4.10645			133.829	5.25024
	59.4118	4.04459	2.86092	2.20228		74.5387	3.60995	3.15756	1.79909			74.5387	3.70862	3.04428	1.7403		32.3718	3.29612	2.98119	1.38524			120.958	5.1069	6.44645	5.58548	3.64514		120.958	4.58633	4.09096	5.48527	3.2675		120.958	9.1365	6.69206	44.2402	3.36244		120.958	15.7843	8.75047	49.642	4.31296			134.495	4.93152
	59.7059	3.76696	2.8213	2.24598		74.9077	3.69231	3.74649	1.89476			74.9077	3.92767	2.8942	1.77424		32.5321	3.53984	3.17953	1.35032			121.557	5.10748	7.60683	6.08569	3.82022		121.557	5.09119	5.85339	5.57502	3.46778		121.557	10.754	6.92043	62.27	3.40824		121.557	17.1465	7.58282	62.7197	4.09628			135.16	5.00115
	60	3.71779	2.67013	2.31514		75.2768	3.73242	3.49329	1.85478			75.2768	3.97415	2.94043	1.56653		32.6923	3.39279	2.81567	1.3719			122.156	5.97726	6.84311	5.9263	3.68829		122.156	4.76552	3.8244	5.65041	3.11916		122.156	10.6186	7.13894	57.1661	3.32705		122.156	16.4863	8.53746	59.629	4.06848			135.826	5.34633
	60.2941	4.0965	3.13581	2.16986		75.6458	3.39876	3.09349	1.90374			75.6458	3.54667	3.4286	1.56898		32.8526	4.57254	2.78975	1.27697			122.754	5.359	7.42426	5.65348	3.78298		122.754	5.25504	6.06133	5.91458	3.20302		122.754	9.77992	5.96497	37.3908	3.25383		122.754	18.3424	8.62743	62.9195	4.20318			136.492	5.21784
	60.5882	3.93221	3.11403	2.18405		76.0148	3.63298	3.29542	1.76141			76.0148	4.09775	2.85221	1.62221		33.0128	3.53822	3.24211	1.43593			123.353	5.26553	6.84559	5.32504	3.79935		123.353	6.20958	5.21884	5.71278	3.21823		123.353	11.18	6.60901	50.6603	3.43229		123.353	17.6207	9.19605	69.7709	4.09737			137.158	5.02875
	60.8824	5.09759	2.88579	2.22804		76.3838	4.06122	3.43313	1.76971			76.3838	3.85689	3.01092	1.60661		33.1731	3.81963	2.75025	1.36575			123.952	5.23739	8.20315	5.85132	3.84381		123.952	6.07073	6.12737	5.65035	3.29252		123.952	10.4659	6.80076	61.3774	3.52765		123.952	15.9013	7.88421	64.4304	4.0013			137.824	5.35047
	61.1765	5.38317	2.96112	2.41368		76.7528	4.45487	3.19622	1.79798			76.7528	3.47557	3.17785	1.67968		33.3333	4.14352	3.04286	1.47758			124.551	5.45918	6.97838	5.64563	3.69803		124.551	5.91025	5.04316	5.68966	3.15358		124.551	11.2512	6.18227	60.1836	3.62445		124.551	18.0589	8.67429	55.991	4.12278			138.489	5.33737
	61.4706	4.67643	2.89576	2.5341		77.1218	4.17976	2.92796	1.68235			77.1218	3.5994	3.14709	1.74234		33.4936	3.83644	2.86497	1.33027			125.15	5.55704	6.88566	5.54986	3.57132		125.15	4.62772	5.81834	5.40261	3.17714		125.15	10.5442	7.19685	67.9661	3.55204		125.15	18.394	8.50619	48.2222	4.17282			139.155	4.89249
	61.7647	4.72701	3.29445	2.16338		77.4908	3.88283	2.87226	1.59223			77.4908	3.79283	2.9004	1.60819		33.6538	4.06752	3.01231	1.36764			125.749	6.23604	6.69187	17.6786	3.65201		125.749	5.26592	6.52883	5.72237	3.14265		125.749	9.66639	6.65798	97.8081	3.41562		125.749	15.8246	7.7408	41.496	4.24113			139.821	5.89876
	62.0588	4.51746	2.89819	2.24458		77.8598	3.85491	3.30106	1.60032			77.8598	3.66043	2.99971	1.63005		33.8141	4.4121	2.76208	1.4521			126.347	5.31677	6.84399	15.7437	3.46233		126.347	5.07152	4.6713	5.93683	3.18772		126.347	10.022	6.71521	94.471	3.57035		126.347	16.5447	8.30207	51.8007	4.09285			140.487	6.02836
	62.3529	4.84958	2.76174	2.20862		78.2288	3.8285	3.13192	1.65396			78.2288	3.99373	3.06071	1.66334		33.9744	3.84407	2.93332	1.35098			126.946	5.98973	5.90519	15.8628	3.54325		126.946	5.46394	5.19211	5.87571	3.41946		126.946	11.0131	7.10356	56.5887	3.43307		126.946	17.2914	7.73973	62.1169	4.092			141.153	4.88489
	62.6471	5.07717	3.1287	2.25344		78.5978	3.66709	2.79842	1.62497			78.5978	3.68114	2.98678	1.64033		34.1346	4.17633	2.84879	1.39966			127.545	5.44799	6.4937	14.6389	3.77746		127.545	5.38045	5.73759	5.6403	3.44039		127.545	10.2123	6.53865	49.0729	3.41567		127.545	16.4386	7.76543	86.9379	4.01262			141.818	4.8145
	62.9412	4.98797	3.22154	2.14492		78.9668	3.88063	2.78331	1.63036			78.9668	3.95674	3.0018	1.65781		34.2949	4.33427	2.96299	1.35228			128.144	4.80811	7.00979	14.5135	3.72431		128.144	6.01983	4.95072	5.83329	3.20355		128.144	11.5102	6.16478	38.5871	3.17177		128.144	16.3722	8.61703	83.3047	4.24216			142.484	4.87585
	63.2353	5.20973	2.96841	2.38526		79.3358	3.88598	3.52252	1.47977			79.3358	3.4346	3.2789	1.6886		34.4551	3.985	2.98296	1.43049			128.743	4.87124	6.50999	14.6621	3.54693		128.743	4.93742	5.06323	5.87783	3.28595		128.743	9.21194	6.46411	37.9437	3.32624		128.743	16.7386	7.65749	75.5681	4.1773			143.15	5.14499
	63.5294	5.52371	2.84634	2.34404		79.7048	3.53508	3.17175	1.45132			79.7048	3.67647	2.72899	1.55611		34.6154	3.87774	2.80773	1.36411			129.341	5.23943	6.1479	14.53	3.77899		129.341	5.02881	5.6295	5.73286	3.52803		129.341	10.1294	6.64361	37.0067	3.13734		129.341	16.1774	7.96283	85.7613	4.20728			143.816	5.65214
	63.8235	4.49488	2.75315	2.30718		80.0738	3.973	3.28227	1.68595			80.0738	3.8839	2.84533	1.60328		34.7756	3.36126	2.73125	1.3844			129.94	5.18257	6.74538	10.4247	3.49215		129.94	4.77037	6.17736	5.65803	3.40478		129.94	10.8162	7.34677	41.7069	3.05585		129.94	16.0012	8.41486	91.4636	4.25544			144.482	5.13488
	64.1176	5.10658	2.97194	2.43508		80.4428	4.53696	2.93454	1.70663			80.4428	3.37337	3.16843	1.66212		34.9359	3.7856	3.05865	1.27104			130.539	5.20462	7.40681	16.0288	3.76671		130.539	4.61101	4.51873	5.63049	3.4659		130.539	10.1274	7.74912	45.2758	3.13243		130.539	17.2712	8.60731	62.584	4.07703			145.148	5.10518
	64.4118	4.31651	3.08179	2.20514		80.8118	4.03021	3.08103	1.71482			80.8118	3.23544	3.31243	1.79947		35.0962	4.1377	2.95943	1.37408			131.138	5.71575	6.95695	16.0153	3.54987		131.138	4.22797	4.85163	5.6501	3.6862		131.138	11.4408	7.2887	50.1643	3.10391		131.138	15.5662	7.35304	87.7585	4.12653			145.813	5.09933
	64.7059	4.57577	2.79588	2.27089		81.1808	3.60242	2.98803	1.73452			81.1808	3.68869	2.93521	1.73985		35.2564	4.17646	3.02469	1.51953			131.737	5.88744	7.59217	14.1758	3.52653		131.737	4.53721	4.86758	5.85437	3.55648		131.737	9.22451	6.65476	58.5038	3.41384		131.737	16.4074	8.29879	87.4068	4.23848			146.479	4.9503
	65	4.66795	2.8938	2.25317		81.5498	4.14183	3.21399	1.48865			81.5498	3.80891	2.89794	1.76941		35.4167	3.63351	3.12118	1.40179			132.335	6.52296	7.18221	16.2271	3.52094		132.335	5.25437	6.07143	5.65621	3.53267		132.335	8.81333	7.67431	55.2028	3.35764		132.335	18.1146	8.35102	60.4389	4.22234			147.145	4.93507
	65.2941	4.5177	3.25885	2.32706		81.9188	4.24918	3.18341	1.59978			81.9188	3.39301	2.93914	1.70517		35.5769	4.17884	2.87522	1.41423			132.934	5.40374	7.24574	13.2757	3.56636		132.934	5.61921	5.58028	5.57423	3.55392		132.934	8.81866	6.14541	105.2	3.15472		132.934	16.9905	8.65168	59.4302	4.14504			147.811	5.6093
	65.5882	3.8216	2.96346	2.35728		82.2878	3.50997	3.28403	1.71797			82.2878	3.59353	3.07823	1.68169		35.7372	3.79223	2.92289	1.49736			133.533	5.46175	6.73581	8.5232	3.74511		133.533	5.57344	6.49734	5.37336	3.48061		133.533	10.7013	5.91898	97.7833	3.35716		133.533	16.2132	8.51611	61.4332	3.9966			148.477	5.60228
	65.8824	4.17038	2.9563	2.33254		82.6568	4.0322	3.05382	1.68891			82.6568	3.55991	3.14623	1.78057		35.8974	4.42754	2.97427	1.47597			134.132	6.14985	6.69937	17.1632	3.55526		134.132	5.58241	4.25062	5.92772	3.6414		134.132	10.6341	7.33573	86.9926	3.01834		134.132	15.8443	8.62669	61.7512	3.88808			149.142	5.39918
	66.1765	4.72087	2.79616	2.36261		83.0258	3.68793	3.24568	1.67878			83.0258	4.0982	2.86692	1.65309		36.0577	3.89381	2.98455	1.43518			134.731	6.22296	7.20412	10.1969	3.68579		134.731	4.66851	4.17309	5.75458	3.30999		134.731	12.5578	5.08493	97.2941	3.63024		134.731	18.1825	8.32628	60.1938	3.86083			149.808	5.2776
	66.4706	3.93213	3.4264	2.21871		83.3948	3.84326	3.14642	1.61973			83.3948	4.14749	2.9318	1.61038		36.2179	4.06489	2.9564	1.41926			135.329	5.46568	7.50924	10.1984	3.61239		135.329	4.61918	4.38289	5.61782	3.35459		135.329	10.8379	6.26585	78.2297	3.49429		135.329	18.545	8.03401	56.0779	4.01538			150.474	4.56841
	66.7647	4.55861	2.84476	2.15595		83.7638	3.7336	2.82731	1.90641			83.7638	4.02472	3.0017	1.69897		36.3782	4.00382	3.16413	1.45967			135.928	5.16042	7.56898	10.3041	3.91588		135.928	4.8623	5.15143	5.68234	3.49157		135.928	11.4295	6.9796	81.89	3.35997		135.928	17.3575	9.44018	55.6026	3.96561			151.14	5.03968
	67.0588	4.31596	3.14089	2.28442		84.1328	3.87799	3.36431	1.66922			84.1328	3.75025	2.93574	1.80715		36.5385	4.03502	4.26615	1.38537			136.527	5.26763	7.69695	7.17303	3.72223		136.527	5.90846	3.87859	5.88608	3.58955		136.527	9.77204	5.95402	58.9354	3.3237		136.527	16.566	8.34142	56.3145	4.07558			151.806	4.70355
	67.3529	4.37153	3.22538	2.2569		84.5018	3.27844	3.05768	1.70821			84.5018	3.5051	3.11547	1.70712		36.6987	3.9971	2.93059	1.42552			137.126	5.42789	6.83989	8.7895	3.82094		137.126	5.86558	3.37811	5.72729	3.67083		137.126	10.3592	6.23832	53.7496	3.24163		137.126	17.1085	8.12834	57.9092	4.10907			152.472	5.03221
	67.6471	4.86313	2.94351	2.22813		84.8708	3.51732	3.46747	1.75129			84.8708	3.38045	2.86034	1.67375		36.859	3.90846	2.87368	1.43905			137.725	6.06458	7.32722	5.80935	3.81265		137.725	4.95506	3.85357	5.54364	3.58796		137.725	9.28715	6.81886	87.3756	3.23909		137.725	15.8588	8.57561	60.9718	3.93257			153.137	5.28256
	67.9412	4.38744	2.83765	2.24393		85.2399	3.4601	2.95946	1.76602			85.2399	3.18427	3.06569	1.68329		37.0192	3.90569	3.03853	1.48345			138.323	5.6642	7.02676	5.62473	3.61639		138.323	5.1206	3.86659	5.89828	3.574		138.323	11.7361	8.52622	90.6596	3.1624		138.323	18.5693	8.86166	56.7866	3.98575			153.803	4.78098
	68.2353	4.29525	2.92979	2.29845		85.6089	3.68086	3.39198	1.78629			85.6089	3.54118	3.66075	1.64149		37.1795	3.81218	3.18759	1.43048			138.922	5.43844	6.98767	5.95704	3.65664		138.922	5.10227	3.94568	5.83991	3.77942		138.922	10.6947	6.80394	84.1328	3.3313		138.922	18.2987	7.90415	58.5579	4.23522			154.469	4.97646
	68.5294	4.51548	3.51262	2.27467		85.9779	3.40046	3.34533	1.90714			85.9779	4.33075	2.9923	1.65577		37.3397	3.78246	3.23736	1.45466			139.521	5.38527	7.17161	4.73914	3.86937		139.521	4.52137	4.02763	5.70976	3.54013		139.521	9.16915	7.40522	90.1518	3.6083		139.521	16.1368	8.97707	47.8988	3.99557			155.135	5.41762
	68.8235	4.33049	3.18712	2.29056		86.3469	3.60959	3.66455	1.71298			86.3469	3.45891	3.20706	1.57767		37.5	3.84106	2.93322	1.44452			140.12	6.67638	7.92965	5.97667	3.69634		140.12	4.75853	5.08134	5.60467	3.74301		140.12	11.8435	7.73233	75.7105	3.42742		140.12	17.3432	8.13971	47.2743	3.95667			155.801	5.08721
	69.1176	4.01053	2.89187	2.19825		86.7159	3.49255	3.03457	1.70193			86.7159	4.3844	3.01975	1.62809		37.6603	4.22202	2.90818	1.5834			140.719	5.92588	7.53571	5.06532	3.71144		140.719	4.13838	5.49845	5.9952	3.88128		140.719	11.0773	7.3788	84.6932	3.31725		140.719	16.8742	8.26108	47.8529	3.86915			156.466	5.20767
	69.4118	4.75133	2.79091	2.3705		87.0849	3.41434	3.35374	1.63486			87.0849	3.73505	2.99205	1.64583		37.8205	3.65079	2.9398	1.52102			141.317	6.0522	7.07328	5.93168	3.73595		141.317	4.37067	5.33502	5.67834	3.77318		141.317	11.1649	6.74284	67.1933	3.59515		141.317	18.1775	8.25066	54.4949	4.15297			157.132	5.55069
	69.7059	4.41584	3.06207	2.21811		87.4539	3.2477	4.70365	1.61023			87.4539	3.83957	2.87022	1.61529		37.9808	3.77141	2.87045	1.49883			141.916	7.06357	6.89171	5.77475	3.76823		141.916	4.87013	5.1483	5.91706	3.70256		141.916	10.8221	7.59056	80.7295	3.60682		141.916	20.6134	10.4833	40.6069	3.93695			157.798	5.33351
	70	4.80106	2.92506	2.17312		87.8229	4.09311	3.09678	1.76162			87.8229	3.60495	3.05556	1.66537		38.141	3.74208	2.89526	1.37084			142.515	5.96692	6.88396	5.69734	3.83581		142.515	4.62163	3.73411	5.9046	3.50202		142.515	11.4506	7.49733	101.45	3.47513		142.515	18.8139	8.33293	46.9978	3.85686			158.464	5.78847
	70.2941	5.07868	3.5658	2.04526		88.1919	3.44477	3.08422	1.75021			88.1919	3.65285	2.96458	1.63183		38.3013	3.95144	2.88514	1.49533			143.114	5.55869	6.88327	5.73136	3.93891		143.114	4.6348	3.79373	5.51179	3.38072		143.114	11.8106	8.19163	83.0835	3.3814		143.114	17.4492	8.37503	44.1538	3.997			159.13	4.87949
	70.5882	4.15284	3.49487	2.08746		88.5609	3.51767	2.98846	1.71884			88.5609	4.27548	2.96441	1.61653		38.4615	3.87268	2.92688	1.38965			143.713	5.11766	7.00667	5.74148	3.87766		143.713	5.15336	3.62501	5.89851	3.3984		143.713	10.3942	7.36073	75.3701	3.50891		143.713	17.1801	8.28403	42.1097	3.90578			159.795	5.1597
	70.8824	4.09557	2.97487	2.15138		88.9299	3.82196	3.06441	1.69912			88.9299	4.08548	2.83732	1.66426		38.6218	3.67762	2.92902	1.47803			144.311	5.52901	6.33299	10.9938	3.79023		144.311	5.49484	3.96276	5.75337	3.37547		144.311	11.5211	9.49354	67.1994	3.14075		144.311	17.9157	8.72397	40.7745	4.05534			160.461	4.97895
	71.1765	4.55467	3.24462	2.21629		89.2989	3.25595	3.15325	1.71525			89.2989	3.59863	3.02725	1.67554		38.7821	3.80165	2.95919	1.44276			144.91	5.89819	8.59413	10.3492	3.90048		144.91	5.16642	4.82552	5.59289	3.0932		144.91	11.8401	7.16201	73.3434	3.49466		144.91	17.552	7.83813	40.3286	4.10004			161.127	5.80214
	71.4706	3.68602	3.14827	2.3044		89.6679	3.55473	3.41138	1.73638			89.6679	3.97234	3.09766	1.73875		38.9423	3.9122	2.93821	1.39595			145.509	5.66475	7.08903	10.9459	3.95361		145.509	5.0711	3.70922	5.65611	3.30692		145.509	11.5288	7.40496	83.6271	3.37223		145.509	16.3571	8.87619	42.1309	3.8842			161.793	5.01671
	71.7647	4.27553	3.03402	2.29228		90.0369	3.68994	3.24403	1.69103			90.0369	4.54752	2.83277	1.66188		39.1026	3.87947	2.79863	1.43311			146.108	5.22622	7.07489	7.83492	3.82086		146.108	5.39523	3.83338	5.89784	3.20629		146.108	11.6942	7.82367	81.5247	3.33084		146.108	15.3142	7.82421	50.5031	3.82696			162.459	5.80552
	72.0588	4.44851	3.13579	2.41151		90.4059	3.41596	3.67094	1.62546			90.4059	3.87461	2.8184	1.74297		39.2628	4.34078	3.247	1.50397			146.707	5.66498	7.2901	8.01728	3.88265		146.707	4.88934	4.02978	5.80616	3.33693		146.707	11.1189	7.06234	76.2793	3.30589		146.707	17.6936	8.76887	47.8174	4.2096			163.125	5.4451
	72.3529	4.77105	3.04935	2.3478		90.7749	3.61727	2.89455	1.69247			90.7749	3.71829	2.99937	1.59921		39.4231	3.30635	3.10516	1.39291			147.305	6.01574	7.16706	7.42101	3.95934		147.305	5.43181	4.3936	5.75743	3.55739		147.305	11.3923	7.13409	52.7939	3.4673		147.305	17.5463	7.89631	52.708	4.04519			163.79	4.40277
	72.6471	4.53519	3.11488	2.26111		91.1439	3.89111	3.07019	1.76424			91.1439	3.62591	3.18465	1.54627		39.5833	3.84086	2.99151	1.4011			147.904	5.39666	7.06921	9.17302	3.8636		147.904	4.8793	3.5965	5.48545	3.51932		147.904	11.6566	7.6974	70.9562	3.20408		147.904	16.7663	8.26705	53.6341	4.09418			164.456	5.45152
	72.9412	3.94384	3.01725	2.25382		91.5129	3.51635	2.88336	1.77356			91.5129	3.77575	3.02478	1.60917		39.7436	3.99908	2.80936	1.46494			148.503	4.95205	7.26851	8.48704	3.98193		148.503	5.50474	4.51908	5.71052	3.49449		148.503	11.7018	8.20796	69.2447	3.12621		148.503	18.4477	8.44986	50.0845	4.11358			165.122	5.10622
	73.2353	3.78934	2.78833	2.19159		91.8819	3.51902	3.41808	1.81304			91.8819	3.45127	2.85953	1.75658		39.9038	4.51268	3.03966	1.53559			149.102	5.85378	6.68427	9.62302	3.88336		149.102	5.49717	4.01857	6.0414	3.44538		149.102	10.7817	7.4748	69.2619	2.88615		149.102	17.7628	8.82753	51.2725	4.20988			165.788	5.65849
	73.5294	3.42347	2.99436	2.40196		92.2509	3.61688	2.91335	1.78616			92.2509	3.60614	3.01065	1.73019		40.0641	4.00751	2.94126	1.4161			149.701	5.33608	7.44065	10.0312	4.18754		149.701	4.54208	3.67556	5.73388	3.44001		149.701	11.4389	7.35686	70.3749	3.14665		149.701	15.5595	7.65618	82.3764	4.35855			166.454	5.50973
	73.8235	4.56593	2.92507	2.38542		92.6199	3.42254	3.0587	2.00188			92.6199	3.4751	3.02273	1.64071		40.2244	3.91385	2.97691	1.47868			150.299	6.40964	7.04633	13.8064	4.11736		150.299	5.61057	3.91883	5.71422	3.42845		150.299	12.0381	7.55892	74.522	3.19859		150.299	17.2647	8.93008	72.8733	4.05159			167.119	5.23464
	74.1176	3.63903	3.30917	2.42479		92.9889	3.89069	3.36086	1.82012			92.9889	4.00373	3.04032	1.63092		40.3846	3.79783	2.95001	1.60612			150.898	6.21778	7.37995	6.40748	4.1973		150.898	6.00126	4.25953	5.73732	3.3485		150.898	11.862	8.34779	73.5944	2.81839		150.898	17.6228	9.06027	72.2288	4.28037			167.785	5.37124
	74.4118	3.91074	3.37715	2.16065		93.3579	3.25741	3.29583	1.86606			93.3579	3.73712	2.81858	1.70743		40.5449	3.61751	3.19644	1.53388			151.497	6.91541	6.5039	5.94358	4.09394		151.497	5.65535	4.12526	5.81116	3.41376		151.497	11.0849	8.45986	72.1303	3.17132		151.497	17.2919	9.17429	71.5137	3.97703			168.451	4.87247
	74.7059	4.11786	2.95805	2.30049		93.7269	4.16316	3.0322	1.86551			93.7269	3.9513	3.07862	1.63426		40.7051	4.09586	3.1957	1.54126			152.096	5.91249	7.20983	5.62234	3.962		152.096	6.06604	4.36473	5.72947	3.5265		152.096	9.73408	6.54378	71.7455	3.18501		152.096	17.5731	9.04421	72.3494	4.18846			169.117	5.80368
	75	4.46042	4.03095	2.11062		94.0959	3.88149	3.12713	1.82798			94.0959	3.43384	2.89525	1.65584		40.8654	3.6406	2.79383	1.42918			152.695	6.21342	7.55072	5.59962	3.92692		152.695	6.55918	4.01742	5.76914	3.4573		152.695	10.7752	8.12528	70.0335	3.07745		152.695	15.5356	8.78255	75.2072	4.32219			169.783	5.41388
	75.2941	4.02764	2.7876	2.19972		94.4649	3.55079	3.36932	1.9874			94.4649	3.79355	2.96594	1.70382		41.0256	3.5531	3.29582	1.53133			153.293	6.50235	6.471	5.30711	4.11179		153.293	6.69374	3.78578	5.74576	3.24441		153.293	12.2307	7.71714	72.3567	2.96962		153.293	16.2729	7.99983	84.3125	4.21649			170.448	5.38983
	75.5882	4.74018	3.29358	2.38927		94.8339	3.88909	2.90157	1.93486			94.8339	3.55813	5.97659	1.70351		41.1859	3.96426	3.07079	1.54538			153.892	6.76303	6.77441	5.12492	4.08309		153.892	5.42648	3.81143	5.79303	3.38978		153.892	11.1172	8.02815	78.6446	3.20177		153.892	19.2586	9.5149	89.3194	4.07451			171.114	5.09379
	75.8824	4.88487	3.07661	2.24077		95.203	3.26754	2.85458	1.94389			95.203	4.0282	2.99146	1.65154		41.3462	4.11626	2.77731	1.47024			154.491	6.46177	7.07246	5.63389	3.94903		154.491	5.71926	3.97723	5.76562	3.33935		154.491	11.7661	8.80639	93.1038	3.50721		154.491	15.3555	8.45785	88.2373	3.9941			171.78	5.67262
	76.1765	4.41928	3.15456	2.26362		95.572	4.24429	2.99838	2.03243			95.572	3.64976	2.95179	1.72244		41.5064	3.99457	2.93508	1.54201			155.09	5.99998	7.56585	5.90361	4.13183		155.09	5.87464	4.75476	5.87174	3.80593		155.09	11.8344	9.07524	95.3985	3.68355		155.09	17.5004	8.34068	91.3333	4.02934			172.446	4.65805
	76.4706	4.31361	3.07931	2.27983		95.941	3.52065	3.09305	2.08554			95.941	3.67465	2.96655	1.65872		41.6667	3.69231	2.93293	1.4907			155.689	5.21026	6.52671	5.70498	4.05256		155.689	4.67556	3.38775	5.5974	3.51804		155.689	11.6071	7.78331	65.2411	3.143		155.689	16.7885	8.81062	99.1834	3.99744			173.112	4.64389
	76.7647	4.28699	2.93004	2.21167		96.31	3.44478	2.86631	1.98762			96.31	4.92848	3.17823	1.79097		41.8269	4.54412	3.17346	1.36749			156.287	6.49696	6.65445	5.64036	3.93159		156.287	5.17995	5.13401	5.98553	3.80732		156.287	10.7904	9.34594	59.9399	3.03714		156.287	17.6127	8.30671	68.2566	4.06914			173.778	5.58499
	77.0588	4.68289	3.07816	2.30158		96.679	3.59535	2.91549	2.05399			96.679	3.82853	3.56334	1.79826		41.9872	3.62659	3.09472	1.49523			156.886	5.07471	7.74195	5.86995	3.96079		156.886	6.92318	3.68861	5.70903	3.71718		156.886	11.6416	9.3427	71.2644	3.06192		156.886	15.0541	5.85778	70.3056	4.12025			174.443	5.12136
	77.3529	4.18832	2.96785	2.19405		97.048	4.88593	3.81072	2.04242			97.048	4.30864	2.99013	1.73714		42.1474	3.91016	2.84324	1.53896			157.485	5.96472	7.78148	6.04755	4.1197		157.485	6.05328	3.90344	5.94861	3.80814		157.485	11.4711	7.60143	71.1536	2.9438		157.485	16.67	5.32818	71.484	4.1904			175.109	5.48834
	77.6471	3.59997	3.11012	2.27197		97.417	3.9466	2.85392	2.02228			97.417	3.73342	2.73303	1.64835		42.3077	3.96215	3.03784	1.43933			158.084	6.23205	7.58953	5.92026	4.05543		158.084	4.46709	4.72627	5.77474	3.73204		158.084	11.5946	6.54412	75.4811	2.98623		158.084	15.7146	6.34372	73.8534	4.04392			175.775	5.15187
	77.9412	3.78888	3.18254	2.32724		97.786	3.83931	2.97218	2.02612			97.786	3.97418	3.02528	1.65994		42.4679	4.06039	3.07755	1.40351			158.683	4.77788	7.56957	7.30892	3.88987		158.683	5.70454	3.96634	5.66136	3.54164		158.683	11.6755	7.05138	76.452	3.069		158.683	16.7685	4.80565	79.0573	4.1849			176.441	5.29676
	78.2353	5.13822	2.99647	2.34128		98.155	3.83605	2.84816	2.17456			98.155	3.98352	3.04442	1.6123		42.6282	4.49486	3.30437	1.41937			159.281	5.65559	7.24075	5.88744	4.04357		159.281	4.70097	4.68465	5.99853	3.66863		159.281	11.257	7.11355	77.5792	3.47076		159.281	16.0732	5.22909	83.372	3.96647			177.107	5.4132
	78.5294	4.17036	2.73242	2.36927		98.524	3.3148	4.97826	2.16278			98.524	4.1371	2.9794	1.53148		42.7885	4.02615	3.4614	1.49944			159.88	4.74123	7.22149	5.85238	3.98124		159.88	4.81294	4.53788	5.92856	3.78619		159.88	10.9325	7.31102	78.5829	3.31807		159.88	14.6028	5.59239	77.693	4.15653			177.772	4.87729
	78.8235	4.01979	3.05791	2.42618		98.893	3.64588	3.79256	2.07946			98.893	3.78492	2.86265	1.54359		42.9487	4.05202	3.10599	1.50248			160.479	6.50549	6.71003	7.29319	4.11284		160.479	4.41671	4.7008	6.02741	3.62413		160.479	12.1471	7.23955	63.8258	3.18144		160.479	15.7882	5.83637	75.9378	3.9757			178.438	5.34606
	79.1176	3.77477	3.04487	2.44037		99.262	3.97842	3.14484	1.96965			99.262	3.81158	2.76876	1.51759		43.109	3.54894	2.94882	1.46484			161.078	5.37226	6.27527	10.2363	4.0792		161.078	4.35746	4.2451	5.44937	4.06672		161.078	11.6368	8.65765	73.0503	3.53319		161.078	18.8337	8.02786	94.831	4.00556			179.104	5.47103
	79.4118	3.85664	3.0751	2.47142		99.631	4.26287	3.33655	1.95237			99.631	3.36317	3.22031	1.52118		43.2692	4.05922	2.87147	1.49191			161.677	4.61167	6.59254	5.51433	3.76548		161.677	4.22145	4.00592	5.6903	3.6435		161.677	12.3548	9.56236	78.0994	3.3025		161.677	16.2999	6.49364	97.4487	3.96315			179.77	4.89438
	79.7059	4.49229	2.94763	2.35548		100	3.60965	3.15112	2.00801			100	4.26606	3.23892	1.48889		43.4295	4.10596	2.8449	1.34412			162.275	6.44692	6.49024	6.05526	4.05887		162.275	4.37752	4.24412	5.92777	3.66691		162.275	12.1067	8.36454	66.494	3.32942		162.275	17.4778	4.44872	93.0745	4.13452			180.436	5.02584
	80	4.32055	2.8336	2.32489													43.5897	3.76398	3.05606	1.70011			162.874	7.91511	7.77419	5.354	4.0517		162.874	4.18201	4.49294	4.82465	3.72431		162.874	10.9286	6.65854	68.4597	3.38534		162.874	17.5323	7.23588	82.7738	3.85233			181.102	5.64918
	80.2941	3.97015	2.94043	2.24949													43.75	3.5949	2.84324	1.66535			163.473	5.90141	7.00257	5.44372	3.99791		163.473	4.52691	4.99389	5.64305	3.57734		163.473	12.6969	9.13457	53.6445	3.19599		163.473	18.397	7.0709	90.5253	3.90653			181.767	5.05321
	80.5882	4.44356	3.0727	2.25296													43.9103	3.49611	2.92724	1.71475			164.072	6.59426	7.46321	5.51759	4.20866		164.072	4.65323	4.08405	5.45185	3.59921		164.072	9.78228	8.49343	62.1262	3.4129		164.072	15.7395	6.18184	91.8588	4.11184			182.433	4.85272
	80.8824	3.98504	3.26868	2.20582													44.0705	4.05572	3.4416	1.61488			164.671	6.65389	7.34796	25.0732	4.10305		164.671	4.74248	4.2139	5.67029	3.84895		164.671	14.2491	9.00732	60.9403	3.3376		164.671	15.5441	6.94982	88.2743	4.0224			183.099	5.49796
	81.1765	4.05884	2.91601	2.16416													44.2308	4.06169	2.79774	1.65882			165.269	6.77606	7.89959	27.4513	4.02216		165.269	4.84238	4.9763	5.43319	3.63538		165.269	11.4253	9.02265	67.77	3.14289		165.269	17.8666	7.20513	86.4026	4.11412			183.765	4.80536
	81.4706	4.35427	2.94765	2.19099													44.391	4.20931	2.94496	1.64394			165.868	6.19652	7.38035	38.8557	4.04195		165.868	4.41864	4.38646	5.82949	3.41016		165.868	10.2946	7.74652	81.0798	3.25575		165.868	18.3014	7.20538	79.9166	3.81465			184.431	4.86441
	81.7647	4.2486	2.9635	2.1182													44.5513	3.71788	2.98926	1.55331			166.467	5.21185	7.07009	36.3375	4.1604		166.467	5.57841	4.59357	5.8705	3.50545		166.467	10.9145	9.73329	70.2021	3.00984		166.467	17.7003	7.49011	104.562	3.89098			185.096	4.53641
	82.0588	3.70092	2.90504	2.26762													44.7115	4.02403	3.09701	1.73961			167.066	5.16724	7.35897	41.2219	4.03875		167.066	4.71013	4.54263	5.91859	3.61286		167.066	10.7994	8.7371	55.4337	3.30438		167.066	17.7014	7.1895	101.353	3.78275			185.762	5.03653
	82.3529	3.92786	2.9391	2.16986													44.8718	3.93466	2.96436	1.42763			167.665	6.84502	6.85706	39.664	3.85365		167.665	4.4514	4.84388	5.52015	3.47121		167.665	11.664	9.35873	47.774	3.11235		167.665	17.1523	7.86585	101.016	4.05123			186.428	4.69813
	82.6471	4.20117	2.89041	2.25148													45.0321	3.80137	3.11641	1.5706			168.263	5.37807	7.40167	40.4227	3.98153		168.263	5.19209	4.45575	5.44612	3.51946		168.263	10.5386	8.79337	53.3267	3.20619		168.263	17.3467	7.44807	68.9115	3.91322			187.094	4.96717
	82.9412	4.4739	3.09002	2.18849													45.1923	3.94623	3.18432	1.53228			168.862	5.97429	7.47422	39.7	4.01436		168.862	5.21716	5.26633	5.5542	3.33238		168.862	11.4145	9.06225	56.9818	3.28339		168.862	19.0158	6.55106	95.6759	3.9019			187.76	5.16782
	83.2353	4.10196	2.9543	2.33073													45.3526	4.4454	3.13437	1.48125			169.461	5.07007	7.26025	39.9957	3.96405		169.461	4.57416	4.6856	5.59126	3.41709		169.461	11.9407	9.79699	53.5911	3.12163		169.461	18.5457	7.49768	95.3084	4.09525			188.425	5.03014
	83.5294	4.37118	2.80804	2.28079													45.5128	3.49486	2.94544	1.57136			170.06	7.20526	7.48851	39.1041	3.90459		170.06	5.03929	5.30565	5.73077	3.50667		170.06	10.9719	8.42705	89.5216	3.21662		170.06	19.2277	6.54498	86.3233	4.0764			189.091	5.01298
	83.8235	4.06843	3.22954	2.35526													45.6731	4.08062	2.98968	1.63169			170.659	5.82771	7.00787	40.7253	3.84387		170.659	5.06137	5.7243	5.95744	3.34233		170.659	12.8422	10.145	97.7194	3.12558		170.659	17.0239	7.00616	79.0525	4.13892			189.757	5.12596
	84.1176	3.66385	3.23495	2.19321													45.8333	3.24635	3.06837	1.54199			171.257	4.90331	7.54009	36.1132	4.08019		171.257	4.9443	4.9191	5.9267	3.67622		171.257	12.2189	9.48267	81.636	2.99675		171.257	16.2618	7.25924	68.26	4.26263			190.423	5.00955
	84.4118	4.0977	2.82827	2.2877													45.9936	4.04003	2.90145	1.42263			171.856	5.48696	7.98552	42.3591	4.00451		171.856	4.6049	4.63873	6.45202	3.45946		171.856	11.5123	9.7132	75.019	3.26621		171.856	16.3584	6.65703	64.7189	4.29625			191.089	4.96425
	84.7059	4.18032	2.95073	2.32735													46.1538	3.91292	2.97298	1.52164			172.455	5.17684	7.37851	37.4776	3.83772		172.455	4.74193	5.23215	5.82433	3.23493		172.455	12.1411	10.2801	86.3654	3.26335		172.455	17.4983	6.42688	61.172	4.36378			191.755	5.27585
	85	3.5525	3.26807	2.26631													46.3141	4.24143	3.05632	1.49246			173.054	6.41042	7.47609	37.7152	3.96555		173.054	4.6215	4.8848	6.1733	3.46572		173.054	12.4602	8.58282	89.3988	3.19126		173.054	17.8714	7.48082	64.6556	4.31709			192.42	5.06741
	85.2941	4.85497	2.87921	2.15434													46.4744	3.76275	2.93054	1.59166			173.653	4.92488	7.27918	44.1522	3.89317		173.653	4.97152	4.62137	6.28828	3.81954		173.653	11.4733	8.99324	90.1419	3.35532		173.653	18.2483	6.79882	50.521	4.36127			193.086	5.39714
	85.5882	4.8993	2.83442	2.17429													46.6346	4.30921	2.86039	1.43759			174.251	5.23408	6.32393	45.193	3.84668		174.251	5.57036	5.10176	5.9795	3.52377		174.251	12.9718	10.5501	103.409	3.19526		174.251	18.6052	7.73386	51.5222	4.35167			193.752	5.10157
	85.8824	3.63551	2.93042	2.08985													46.7949	4.1057	3.08992	1.47546			174.85	5.53599	7.76003	43.1251	3.92687		174.85	4.83165	5.20423	6.09709	3.47924		174.85	12.9637	9.14138	113.062	3.24391		174.85	20.7472	10.3312	47.5647	4.36158			194.418	5.27847
	86.1765	3.96684	3.24502	2.16268													46.9551	4.1058	2.82666	1.53204			175.449	4.96517	6.91707	40.876	3.87963		175.449	4.79615	5.6882	7.06372	3.42309		175.449	12.8007	9.42397	90.4057	3.29465		175.449	20.2026	9.54107	59.2553	4.11762			195.084	5.2514
	86.4706	4.11499	2.85455	2.24249													47.1154	3.66289	2.81455	1.56864			176.048	5.42207	7.22656	35.8421	3.83906		176.048	4.65078	5.30144	7.17301	3.47482		176.048	13.1352	9.06981	102.461	3.25391		176.048	21.0125	8.62064	59.9953	4.03967			195.749	4.75482
	86.7647	4.30045	3.20276	2.18366													47.2756	3.43721	2.97866	1.53194			176.647	5.9838	7.10496	39.5256	4.08945		176.647	4.37935	4.67435	5.94133	3.16933		176.647	11.0822	7.98994	98.8908	3.11534		176.647	19.9594	7.86642	59.8353	4.32377			196.415	4.79524
	87.0588	3.48834	2.96787	2.26471													47.4359	4.13327	3.16038	1.587			177.246	6.28421	7.44916	41.6408	3.92564		177.246	6.86254	3.43569	5.93293	3.34598		177.246	12.2533	8.65719	82.8514	3.12312		177.246	20.7016	9.10936	62.7143	4.12031			197.081	5.37853
	87.3529	3.49684	2.97186	2.12532													47.5962	3.66953	2.73456	1.54909			177.844	5.2958	6.44398	42.44	4.02125		177.844	5.38385	4.27923	5.21462	3.50998		177.844	11.0649	8.54335	79.0661	3.00461		177.844	20.1485	8.79372	62.269	4.1827			197.747	5.14374
	87.6471	4.23519	3.23078	2.25063													47.7564	3.84864	3.03232	1.6185			178.443	6.17778	6.9366	42.7734	4.03573		178.443	4.8453	3.8243	5.51006	3.72039		178.443	11.2673	8.60241	81.9859	3.22273		178.443	21.6586	10.3172	90.4324	4.12159			198.413	5.22235
	87.9412	3.66426	2.73127	2.1033													47.9167	3.57336	2.89102	1.66755			179.042	5.84107	7.01157	42.0472	4.11683		179.042	6.05207	4.40936	5.25173	3.41351		179.042	13.1373	9.4239	100.821	3.3458		179.042	21.2197	9.28035	74.2572	4.11035			199.079	5.30182
	88.2353	4.014	2.82809	2.21668													48.0769	3.48799	2.86458	1.67533			179.641	5.93841	7.63537	39.8463	3.99156		179.641	4.29347	4.29201	5.30873	3.48368		179.641	12.4915	9.26664	105.174	3.18446		179.641	20.3233	8.34433	74.9403	4.04634			199.744	4.97243
	88.5294	3.95397	2.86278	2.18236													48.2372	3.91862	2.80786	1.81121			180.24	5.9485	6.07852	42.9641	4.11212		180.24	5.51324	4.41643	5.05067	2.99418		180.24	12.3439	8.94239	87.4232	3.20295		180.24	20.4241	9.31817	87.3895	4.01203			200.41	4.62797
	88.8235	3.80546	2.96775	2.24178													48.3974	3.67154	3.13733	1.76093			180.838	5.22011	6.66045	42.7364	4.14052		180.838	5.48707	5.05281	5.21485	3.32612		180.838	12.6274	8.99197	100.329	3.16149		180.838	21.3189	10.7166	90.8136	4.17414			201.076	5.46558
	89.1176	3.4933	3.1376	2.21558													48.5577	3.7106	3.1161	1.65748			181.437	6.03993	7.45449	40.2183	4.02199		181.437	5.4543	5.63758	5.14401	3.54713		181.437	12.0464	9.25629	106.578	2.92196		181.437	22.5235	10.2335	59.8542	4.12496			201.742	5.65079
	89.4118	3.62255	3.18454	2.31991													48.7179	3.86023	2.95104	1.54605			182.036	5.79278	6.33405	56.5183	4.13272		182.036	5.07815	5.04163	5.25566	3.36191		182.036	11.1343	8.57849	72.0817	3.30752		182.036	21.728	9.96008	67.3283	4.26558			202.408	5.17711
	89.7059	3.85939	3.02326	2.12755													48.8782	3.91508	2.7497	1.55344			182.635	5.75708	6.50437	56.6977	4.11555		182.635	5.38265	6.18226	5.14688	3.30092		182.635	11.514	7.6222	57.332	3.01435		182.635	20.1097	9.39304	70.2171	4.45544			203.073	4.75158
	90	4.29165	2.94069	2.17934													49.0385	3.96166	3.00564	1.42783			183.234	5.44855	9.45079	62.0028	4.09398		183.234	5.79961	5.36521	5.63788	3.42259		183.234	12.9877	8.21547	99.6072	2.88314		183.234	21.4524	9.86405	48.7709	4.07195			203.739	5.35933
	90.2941	3.51624	2.94626	2.1182													49.1987	3.63904	2.99543	1.72309			183.832	4.96392	7.24022	63.9831	4.23668		183.832	5.5157	6.05886	4.99899	3.50861		183.832	10.1052	8.27093	104.213	3.13618		183.832	21.3271	10.2988	60.9245	4.30094			204.405	5.20487
	90.5882	3.82137	2.84588	2.117													49.359	4.1223	2.88609	1.68909			184.431	4.8923	6.99329	74.1762	4.10753		184.431	4.80108	4.83895	5.16211	3.30304		184.431	11.9774	8.76498	97.2041	2.7573		184.431	21.6031	10.0762	55.7442	4.28878			205.071	5.37685
	90.8824	3.83127	3.18599	2.1916													49.5192	3.95815	2.86101	1.6709			185.03	4.81067	6.88239	80.0702	4.04919		185.03	5.62276	5.38776	4.93123	3.43891		185.03	12.2681	8.83212	81.7336	2.69246		185.03	22.4058	9.46838	47.4458	4.2798			205.737	5.32406
	91.1765	3.78952	3.124	2.2277													49.6795	3.95893	3.23177	1.70796			185.629	5.39561	7.22403	84.2322	4.20165		185.629	5.2222	7.36962	5.80047	3.36601		185.629	13.4003	9.04509	80.5011	2.88201		185.629	21.7601	9.2523	41.0099	4.36367			206.402	5.40206
	91.4706	3.88144	3.01488	2.30199													49.8397	4.61101	2.96697	1.77226			186.228	6.07325	7.39428	71.3447	3.93849		186.228	5.51593	5.65024	5.87877	3.92133		186.228	12.2409	9.07699	93.9168	2.97138		186.228	20.5824	9.57042	45.6191	4.06303			207.068	5.37946
	91.7647	3.47288	3.19717	2.31513													50	3.71108	2.87892	1.54822			186.826	5.09559	7.1253	74.0459	3.924		186.826	5.18099	5.49208	6.03119	3.35655		186.826	12.6236	8.7326	100.141	2.95802		186.826	22.5151	9.87011	36.3974	4.13939			207.734	4.86279
	92.0588	3.30112	2.99063	2.2757													50.1603	3.5979	3.22576	1.56206			187.425	5.13033	6.00002	77.4397	4.0029		187.425	6.22712	4.26756	5.8574	3.91189		187.425	12.019	9.29719	89.4482	2.73066		187.425	21.6204	9.05767	35.2168	4.22243			208.4	5.56849
	92.3529	3.97998	3.17493	2.1808													50.3205	4.18052	3.18225	1.49576			188.024	5.35567	6.69867	47.1568	4.12351		188.024	4.66002	4.44524	5.84525	4.03258		188.024	11.7426	7.19765	84.9571	2.95842		188.024	20.2005	8.56904	39.7156	3.87768			209.066	5.21382
	92.6471	3.52885	2.7981	2.28116													50.4808	3.59118	2.87531	1.63144			188.623	5.42212	6.99583	46.615	4.40074		188.623	5.72272	4.0545	6.21347	3.59822		188.623	12	7.57518	64.6332	2.97247		188.623	19.6536	9.66099	47.9855	4.103			209.732	4.9056
	92.9412	3.37352	3.31066	2.25965													50.641	3.58235	2.88107	1.59123			189.222	5.411	7.11476	44.3607	4.40236		189.222	4.96424	4.62286	5.90079	3.85152		189.222	11.2598	7.28287	76.658	3.1674		189.222	20.9485	9.39682	40.6639	4.10846			210.397	5.69316
	93.2353	3.31471	3.41017	2.32836													50.8013	3.85949	2.89754	1.47875			189.82	4.69374	7.24367	47.1157	4.33016		189.82	5.01385	4.02367	5.77699	3.84104		189.82	11.1249	7.26469	74.4241	3.19904		189.82	21.6965	9.61404	33.6327	4.07642			211.063	5.01628
	93.5294	3.75125	3.30693	2.28183													50.9615	3.79002	3.02816	1.53723			190.419	5.21327	6.60703	28.1012	4.12192		190.419	4.59795	3.78997	6.09525	3.89447		190.419	10.5799	8.28939	84.7187	3.16049		190.419	21.6616	9.87917	33.675	4.07492			211.729	5.11557
	93.8235	3.36589	2.84513	2.28781													51.1218	3.5936	3.0606	1.54005			191.018	4.99116	7.20283	58.7174	4.40047		191.018	4.08205	4.38181	5.95372	3.97208		191.018	10.5997	6.37104	61.9092	3.38066		191.018	21.856	8.47861	42.0342	3.997			212.395	5.63898
	94.1176	3.66551	3.02273	2.50302													51.2821	3.96797	3.05045	1.52878			191.617	6.21381	7.08473	74.6408	4.55056		191.617	5.64684	4.36727	5.83706	3.78074		191.617	11.0036	7.57324	86.8228	3.12376		191.617	20.6447	9.5144	40.4598	4.18084			213.061	6.1485
	94.4118	3.8594	3.19743	2.32064													51.4423	4.30924	3.53071	1.57022			192.216	4.96461	7.05198	62.9689	4.40329		192.216	4.71518	4.67387	5.96042	3.79486		192.216	9.96675	6.65453	84.3182	3.03441		192.216	23.3694	9.40377	36.9324	4.20739			213.726	5.86849
	94.7059	3.27143	3.14619	2.29638													51.6026	3.83991	2.92248	1.48181			192.814	5.06581	8.04141	64.7345	4.30018		192.814	6.56991	4.20254	6.0342	3.59175		192.814	11.7585	7.0002	92.0656	3.04555		192.814	22.7787	10.2773	41.0545	4.11064			214.392	5.57194
	95	3.99077	3.00653	2.34672													51.7628	4.17976	3.37571	1.52554			193.413	5.04832	6.55382	66.3018	4.56206		193.413	6.101	3.5835	5.94747	3.57075		193.413	11.7278	9.5005	92.0526	3.22786		193.413	23.7737	9.66747	43.9897	4.16078			215.058	5.41986
	95.2941	3.69255	3.04696	2.26119													51.9231	3.72661	3.09982	1.58841			194.012	5.27318	7.51921	77.6993	4.571		194.012	5.77123	5.06347	5.8263	3.43262		194.012	11.8542	8.68542	92.347	3.04468		194.012	23.889	10.9161	36.587	4.23229			215.724	5.56964
	95.5882	3.45905	2.84459	2.31847													52.0833	3.62852	2.82986	1.50603			194.611	5.42387	6.49321	83.8999	4.48118		194.611	5.86255	5.18664	6.13347	3.39628		194.611	10.09	7.28874	89.7204	3.22072		194.611	23.4199	10.6276	40.3175	4.18297			216.39	4.95412
	95.8824	4.1188	3.145	2.32471													52.2436	5.04843	3.00288	1.47918			195.21	5.03128	8.5065	73.3966	4.28984		195.21	5.46796	5.88912	7.10476	3.73269		195.21	12.0436	8.55176	85.4189	2.8309		195.21	26.5784	11.6214	39.4437	4.3359			217.056	4.98163
	96.1765	3.72576	3.17689	2.48225													52.4038	3.96264	3.05168	1.53975			195.808	5.9462	6.54297	88.5087	4.25981		195.808	3.86987	5.61093	6.33361	3.64247		195.808	10.293	6.9876	101.037	3.27548		195.808	26.6852	13.3366	45.4407	4.18782			217.721	5.17206
	96.4706	3.71241	2.89228	2.29425													52.5641	3.54836	2.96106	1.5637			196.407	5.77614	7.73867	95.1821	4.3792		196.407	4.85791	5.01836	6.0433	3.9486		196.407	11.6599	8.71336	71.9015	3.40089		196.407	26.1673	14.233	39.6816	4.06125			218.387	5.34452
	96.7647	4.03661	2.92178	2.27771													52.7244	4.36647	2.97921	1.54785			197.006	5.48558	7.36693	86.2641	4.02257		197.006	3.50269	4.40318	5.91664	3.73561		197.006	12.0854	9.25588	74.1124	3.20242		197.006	26.543	14.3848	48.2106	3.92544			219.053	5.30971
	97.0588	3.88307	2.92605	2.13645													52.8846	4.31178	2.97845	1.59543			197.605	5.03984	6.8436	88.42	4.11728		197.605	5.15437	5.10304	6.4823	3.76788		197.605	11.3471	9.44264	61.1742	3.51202		197.605	24.6749	12.5764	45.3382	4.06044			219.719	4.97649
	97.3529	3.90861	2.904	2.28182													53.0449	3.46751	3.44858	1.5542			198.204	4.96739	7.89347	89.3185	4.26854		198.204	4.46255	5.65055	7.97203	4.19703		198.204	11.2838	8.44655	74.0714	3.08803		198.204	27.5586	14.5265	46.1135	4.29771			220.385	4.71722
	97.6471	3.54193	2.92251	2.23216													53.2051	3.5889	2.9243	1.55989			198.802	4.72914	7.90077	88.8972	4.16024		198.802	4.47248	4.55215	6.34987	4.14982		198.802	10.9761	8.86425	81.3321	3.1546		198.802	24.5216	11.8828	44.7396	4.20942			221.05	4.92675
	97.9412	3.70178	3.0884	2.33906													53.3654	3.75796	3.20882	1.63646			199.401	5.81752	7.71603	105.061	4.1125		199.401	4.72809	4.92335	6.23794	3.91005		199.401	12.0692	7.95592	82.4342	2.80019		199.401	27.049	12.6354	49.3511	3.97709			221.716	5.28449
	98.2353	3.28192	3.0533	2.32432													53.5256	3.99581	3.01743	1.70432			200	4.88121	6.09263	122.772	4.11736		200	4.93883	5.36716	5.99746	4.27744		200	10.6947	8.71904	71.0273	3.05286		200	25.2989	11.6	35.6163	4.19033			222.382	5.15614
	98.5294	3.33427	3.40117	2.25417													53.6859	4.16789	2.83017	1.62213			200.599	5.30917	8.23235	110.818	4.32914		200.599	4.75356	5.35743	6.11649	4.02229		200.599	11.626	8.9142	72.5718	3.25562		200.599	27.4546	14.7633	41.9469	4.1156			223.048	5.41019
	98.8235	3.74542	3.43419	2.29496													53.8462	4.16397	2.77033	1.59101			201.198	5.74678	7.73124	108.355	4.39837		201.198	5.12931	5.42622	6.24576	3.39427		201.198	10.2051	7.39163	54.5626	3.35681		201.198	25.2188	12.4956	42.0088	4.06772			223.714	5.76017
	99.1176	4.59765	2.98754	2.25357													54.0064	4.31956	2.94156	1.59268			201.796	5.3836	6.92253	91.3357	4.41873		201.796	4.53324	4.35717	5.9395	3.68593		201.796	10.444	6.89705	54.8583	2.84716		201.796	26.3064	14.619	37.5024	4.19815			224.379	5.75865
	99.4118	3.53667	2.92051	2.24977													54.1667	4.03499	2.78064	1.53141			202.395	4.60937	7.90036	94.0825	4.49163		202.395	4.87377	4.57802	5.98731	3.73972		202.395	11.7915	7.29308	57.401	3.22615		202.395	25.0617	11.6839	26.7007	4.0436			225.045	5.66401
	99.7059	3.48435	2.91846	2.22273													54.3269	4.4887	3.04018	1.65089			202.994	5.75637	7.46216	99.7469	4.42635		202.994	5.29282	3.98367	6.09359	3.31378		202.994	10.7735	7.06309	59.0767	3.20358		202.994	24.4314	11.4222	26.4709	3.8696			225.711	5.59205
	100	3.51551	3.27132	2.22099													54.4872	3.5677	2.86203	1.61128			203.593	4.95521	6.46782	101.028	4.28921		203.593	5.42103	4.78671	6.28664	4.10645		203.593	13.5276	9.78455	72.9487	2.9919		203.593	25.0533	12.8909	26.7999	3.81525			226.377	6.17488
	100.294	3.98013	3.21797	2.21926													54.6474	3.28183	3.09838	1.65474			204.192	5.48632	6.84407	96.0979	4.03284		204.192	5.68035	4.35104	6.9678	3.68087		204.192	10.8474	8.64917	65.9442	3.04907		204.192	25.2409	12.875	27.0025	3.77265			227.043	5.98537
	100.588	3.30217	3.01216	2.2713													54.8077	3.50448	3.16163	1.5894			204.79	5.139	7.62704	92.1034	4.21424		204.79	4.57055	4.19004	6.89918	3.66688		204.79	11.8505	7.31339	67.1372	3.18463		204.79	25.6866	11.7282	26.7227	4.15474			227.709	5.28963
	100.882	3.98142	3.07373	2.27503													54.9679	3.62487	3.2191	1.56636			205.389	4.99804	7.25467	102.482	4.32126		205.389	4.98266	3.9462	7.33431	3.74994		205.389	9.83844	7.36929	78.0468	2.99587		205.389	26.2634	13.1616	26.6247	4.1012			228.374	6.70972
	101.176	3.89119	2.85392	2.14709													55.1282	3.76324	2.91147	1.66079			205.988	6.11997	7.18943	94.6242	4.40261		205.988	4.50172	3.6135	6.86164	4.06795		205.988	11.8554	9.60615	83.2903	3.1349		205.988	25.983	13.0303	27.0684	4.26147			229.04	5.80606
	101.471	4.04593	2.89457	2.2043													55.2885	3.14793	3.10816	1.63546			206.587	5.10823	8.50138	88.6711	4.43088		206.587	5.14662	3.78925	5.91724	3.83978		206.587	13.4368	8.59656	70.6966	2.94676		206.587	25.805	12.6741	26.145	3.96297			229.706	5.52356
	101.765	3.92289	2.85152	2.05135													55.4487	3.23993	2.98525	1.61735			207.186	5.61784	7.34025	99.7894	4.26859		207.186	4.42484	3.1063	6.95584	3.46888		207.186	11.6047	9.16891	73.0091	2.82161		207.186	25.092	12.0656	26.0237	4.07242			230.372	5.27
	102.059	4.08222	3.03428	2.3192													55.609	3.16926	2.9246	1.58085			207.784	5.09194	7.65789	97.7975	4.05868		207.784	4.74153	4.15593	9.40294	3.66907		207.784	10.1495	7.71916	84.2038	3.07461		207.784	25.9069	12.1663	27.4637	3.99329			231.038	5.71272
	102.353	3.63546	3.20491	2.27017													55.7692	3.37411	2.90372	1.64421			208.383	5.23689	7.64969	90.1768	4.03273		208.383	4.73788	3.75718	11.238	3.30098		208.383	11.7448	8.69695	74.3838	3.05756		208.383	24.8842	12.2893	26.315	4.06738			231.703	5.16955
	102.647	3.90289	3.30456	2.41393													55.9295	3.52628	3.20236	1.53068			208.982	5.45785	7.79173	71.6905	4.20868		208.982	4.44564	4.9184	6.20789	3.59699		208.982	10.3831	8.08998	77.2877	2.90843		208.982	25.6532	12.3333	26.7757	4.05023			232.369	5.26214
	102.941	3.63716	2.82382	2.36127													56.0897	3.51373	3.05495	1.6733			209.581	5.44494	7.72291	61.5469	4.20735		209.581	4.33151	4.05882	6.16862	3.71108		209.581	11.8593	8.98234	64.6877	3.24056		209.581	26.6134	13.1922	27.34	3.94128			233.035	6.21409
	103.235	4.04692	2.81264	2.25139													56.25	4.59807	3.09586	1.45141			210.18	7.47171	7.78813	79.0563	4.12894		210.18	4.27561	4.14358	5.81506	3.84158		210.18	12.3501	9.69609	68.7621	2.92225		210.18	25.1453	12.6994	26.8423	3.90591			233.701	4.99042
	103.529	3.68085	2.95599	2.39315													56.4103	3.26804	2.87118	1.60576			210.778	5.62853	6.63314	78.4908	3.97121		210.778	6.49849	4.49393	5.76126	4.00971		210.778	12.2947	8.86252	66.5986	3.12417		210.778	25.6148	12.172	28.5342	3.9376			234.367	5.16477
	103.824	4.05396	3.3838	2.28399													56.5705	3.9129	3.13519	1.64673			211.377	5.61294	6.62032	85.3516	4.05699		211.377	5.56674	5.09276	6.19087	3.70033		211.377	11.6998	8.79433	52.7424	2.87495		211.377	23.1407	10.7467	29.2656	4.06647			235.032	4.85278
	104.118	4.1119	3.14689	2.33457													56.7308	3.31547	3.14476	1.71943			211.976	5.19859	7.82099	73.0253	3.97242		211.976	5.0049	3.80087	7.12718	4.03964		211.976	11.1304	8.91523	57.9419	3.04577		211.976	23.375	9.52271	37.6318	4.16429			235.698	5.06797
	104.412	3.94016	2.96852	2.32433													56.891	3.29942	3.21193	1.56542			212.575	5.58935	8.25991	78.9189	3.92083		212.575	4.78631	5.12933	6.4908	3.60848		212.575	12.7865	8.90121	50.148	3.05613		212.575	24.4072	10.8651	37.3289	4.17699			236.364	5.50668
	104.706	3.8383	2.72979	2.40033													57.0513	3.25999	2.77082	1.51249			213.174	5.45198	7.73406	78.8308	4.14337		213.174	4.99581	4.10957	7.01817	3.95274		213.174	12.0398	9.17835	51.5767	3.14932		213.174	23.0847	10.3385	39.4084	4.03721			237.03	5.72962
	105	3.69465	3.13179	2.29861													57.2115	4.01926	2.96214	1.58307			213.772	5.62708	7.24294	82.5197	3.97956		213.772	4.698	4.21641	6.07329	3.95741		213.772	10.9295	8.08026	61.8684	3.18162		213.772	22.5633	9.35528	42.2164	3.87565			237.696	5.13693
	105.294	3.44392	2.95609	2.28327													57.3718	3.18659	2.97604	1.53665			214.371	5.79332	7.66259	68.9852	4.09656		214.371	4.93517	3.66777	6.10925	3.98749		214.371	11.336	7.96979	66.6443	3.09682		214.371	23.0445	9.99845	52.5286	3.9355			238.362	6.51807
	105.588	3.63177	3.23755	2.23568													57.5321	3.57231	2.92698	1.63512			214.97	5.94064	7.36646	65.7694	4.10013		214.97	4.47044	3.35091	7.21196	4.0119		214.97	12.5883	8.65319	59.6914	3.0171		214.97	23.0902	9.37541	45.3152	3.98511			239.027	5.62442
	105.882	3.78233	2.73615	2.34834													57.6923	3.91107	3.07307	1.64055			215.569	5.60587	6.81146	67.552	4.29552		215.569	4.73932	4.36113	7.32871	3.76107		215.569	11.1951	8.50166	49.3695	3.23548		215.569	23.6759	10.6259	51.1783	4.23426			239.693	5.09901
	106.176	4.10576	2.83637	2.37904													57.8526	4.04761	3.078	1.55469			216.168	5.58916	7.79698	63.001	4.11506		216.168	4.52782	4.82911	6.07661	3.84143		216.168	11.3793	7.15512	62.7338	3.12258		216.168	21.8907	9.15795	49.8994	4.0502			240.359	5.35965
	106.471	4.14021	2.7797	2.30872													58.0128	3.6445	2.94715	1.55252			216.766	5.34389	6.56194	55.1012	3.95484		216.766	5.42841	4.6376	5.90428	3.93908		216.766	10.1216	7.1107	39.2163	3.46764		216.766	23.3986	8.88286	44.2722	4.05982			241.025	5.14994
	106.765	4.04908	3.06267	2.33732													58.1731	3.82364	2.92244	1.50564			217.365	5.53744	7.10919	54.4633	4.02328		217.365	4.73205	4.3059	6.33978	4.05248		217.365	10.2938	7.44619	53.5175	3.31611		217.365	22.6642	9.44404	44.7969	4.14211			241.691	5.0968
	107.059	4.7052	3.05841	2.19972													58.3333	3.93457	3.20568	1.42361			217.964	5.43792	6.50864	55.1391	4.02451		217.964	5.02539	3.49941	5.77775	3.84018		217.964	10.5152	7.06219	53.8001	3.06266		217.964	22.7418	9.53772	49.8856	4.12687			242.356	5.25058
	107.353	3.72682	3.04177	2.18817													58.4936	3.55465	3.11537	1.47562			218.563	6.09401	7.88694	49.7467	4.06542		218.563	4.9967	4.69194	5.91325	3.72489		218.563	12.4522	10.0744	57.3361	3.3113		218.563	22.7882	10.6211	58.3403	4.11179			243.022	4.99243
	107.647	3.46715	3.02037	2.23025													58.6538	3.13955	2.93517	1.44426			219.162	5.67681	6.4513	46.0351	3.98096		219.162	5.18244	5.79108	6.37397	3.65412		219.162	10.4528	7.18374	58.9055	3.40769		219.162	24.9886	10.6647	49.1406	4.22023			243.688	6.29269
	107.941	3.4101	3.63056	2.30274													58.8141	3.58243	2.95937	1.5606			219.76	5.3284	7.36677	64.7748	4.23479		219.76	5.11475	6.94718	7.839	3.79262		219.76	9.68105	6.04598	59.6453	3.22754		219.76	23.8436	10.7572	41.8264	4.22548			244.354	5.1089
	108.235	3.89305	3.17243	2.19385													58.9744	3.94918	3.22615	1.56017			220.359	5.41833	7.3831	49.9636	4.15826		220.359	5.43636	6.88642	5.90469	3.8573		220.359	10.8311	7.00347	58.4017	3.32831		220.359	24.564	11.1934	41.2154	3.97809			245.02	4.97243
	108.529	3.92645	3.08412	2.28802													59.1346	4.40158	2.75127	1.52604			220.958	4.8957	6.64224	55.2165	4.10905		220.958	4.61249	6.74503	6.31261	3.91761		220.958	11.214	7.25445	57.0559	3.42893		220.958	24.513	9.54438	41.9305	4.13031			245.686	4.89889
	108.824	3.51169	3.11125	2.24231													59.2949	3.56927	2.90761	1.56857			221.557	5.22336	7.26776	57.5189	4.22112		221.557	5.09147	6.36408	7.24074	3.35288		221.557	11.8153	8.22987	56.5499	3.31236		221.557	24.6846	10.5224	41.1887	4.02925			246.351	4.49824
																	59.4551	3.50901	2.87997	1.56856			222.156	5.73452	7.00201	49.5172	3.88558		222.156	5.11153	6.84543	5.93301	3.70582		222.156	11.4838	9.11238	55.7133	3.08673		222.156	24.814	11.549	40.434	3.77573			247.017	5.59884
																	59.6154	4.76845	3.1616	1.58027			222.754	6.15503	7.81968	46.9235	4.11093		222.754	5.70791	6.88202	6.35232	3.76119		222.754	11.5716	8.68777	57.4939	2.99585		222.754	24.8081	11.2937	41.8263	3.94085			247.683	5.1119
																	59.7756	3.38409	3.01301	1.56991			223.353	5.46373	7.59845	45.7433	4.23216		223.353	4.88129	4.48674	6.28922	3.89515		223.353	9.99997	7.13999	56.0473	3.23832		223.353	25.1435	11.194	42.6388	3.88963			248.349	4.88371
																	59.9359	4.23801	3.14138	1.6386			223.952	5.74876	7.30133	45.1251	4.04242		223.952	4.6093	4.32836	5.94924	3.61569		223.952	11.8667	8.78312	55.1389	3.33989		223.952	25.1749	10.6845	42.971	3.81348			249.015	4.56729
																	60.0962	4.25303	2.90508	1.58763			224.551	5.50772	7.36103	56.6724	4.06384		224.551	4.99397	4.70928	6.71697	3.83191		224.551	12.5843	8.7112	57.0524	2.91267		224.551	25.8116	11.8807	44.7662	4.09242			249.68	4.61383
																	60.2564	4.1028	2.83553	1.55992			225.15	5.45293	7.60944	65.239	4.00945		225.15	5.79884	4.734	6.11032	4.02488		225.15	11.3453	8.03688	54.9776	2.93968		225.15	25.3322	11.4465	44.44	4.05385			250.346	5.15428
																	60.4167	3.9044	3.3573	1.57127			225.749	5.60917	7.31648	68.2054	3.97222		225.749	4.56968	4.24761	6.74927	3.54402		225.749	9.66984	7.15681	55.5173	2.81124		225.749	25.7156	11.3105	43.1309	3.90114			251.012	5.00634
																	60.5769	3.89634	3.05896	1.46311			226.347	5.40983	7.00435	79.7173	4.13501		226.347	5.02006	4.62031	6.82857	3.43973		226.347	10.5149	7.80746	54.5839	3.12742		226.347	24.6218	11.4899	40.7716	3.99378			251.678	5.12366
																	60.7372	3.75222	2.95793	1.60609			226.946	5.68978	7.06137	69.1407	4.09905		226.946	4.45036	3.84441	6.41059	3.26451		226.946	9.95234	7.41961	52.7839	2.59949		226.946	23.3698	9.63897	43.1739	4.01805			252.344	5.49517
																	60.8974	3.46463	3.34467	1.48943			227.545	5.51289	7.44176	66.4737	3.98916		227.545	4.18533	5.5678	5.98122	3.53255		227.545	9.64401	6.62029	51.3234	2.65469		227.545	24.3269	10.4119	42.5781	3.87821			253.009	5.57262
																	61.0577	3.93226	2.91649	1.56134			228.144	5.49414	7.49446	88.5203	4.20466		228.144	5.10974	5.21672	6.96889	3.66133		228.144	10.4153	6.55618	52.6575	2.6779		228.144	24.8973	11.0314	45.3246	3.87347			253.675	4.71538
																	61.2179	3.73411	2.79226	1.58651			228.743	4.99472	7.31714	57.8333	4.13078		228.743	4.87242	4.12722	6.58529	3.94666		228.743	11.4211	9.65137	53.0758	2.57472		228.743	25.702	11.6142	45.2364	3.95107			254.341	5.41612
																	61.3782	5.02444	2.93644	1.62628			229.341	6.53124	6.89082	77.3681	4.16473		229.341	4.98066	4.04168	6.04916	3.61003		229.341	9.92458	6.19584	56.5957	2.80984		229.341	26.1961	10.7158	42.0296	4.01837			255.007	4.97494
																	61.5385	4.28332	2.73143	1.65852			229.94	5.11823	7.5445	106.955	3.90173		229.94	5.40806	4.44597	6.67971	3.57703		229.94	11.2394	6.9669	51.2142	2.54702		229.94	24.5172	10.0959	45.4234	3.88721			255.673	5.30345
																	61.6987	3.8683	3.08814	1.59003			230.539	5.66328	7.34462	74.8255	4.13789		230.539	4.51411	5.39756	6.01596	3.37622		230.539	11.0062	7.34254	44.6028	2.87173		230.539	25.1576	11.0247	46.9775	4.16631			256.339	5.07366
																	61.859	3.65157	2.9482	1.609			231.138	6.0542	6.58784	51.0257	4.32998		231.138	5.2933	5.18449	6.04772	3.16536		231.138	10.3974	6.87281	47.083	2.72627		231.138	25.0714	12.8396	54.0641	3.97386			257.004	6.09779
																	62.0192	3.66422	2.91524	1.62119			231.737	5.00879	6.81391	86.3019	4.2645		231.737	4.55603	4.71455	5.91563	3.25619		231.737	11.4292	7.38971	47.7772	2.70154		231.737	25.8952	13.2731	46.7658	4.26019			257.67	5.03078
																	62.1795	4.22668	2.80299	1.52934			232.335	6.72732	6.92961	80.6646	4.19425		232.335	4.8494	4.42689	6.63358	3.18159		232.335	11.6403	8.97879	64.095	2.78486		232.335	24.1768	12.4032	48.4599	3.91099			258.336	5.05648
																	62.3397	3.83163	2.82755	1.57495			232.934	6.79596	7.15449	77.9379	4.33676		232.934	4.59735	3.91506	7.52571	3.49807		232.934	11.0997	9.31953	70.9878	2.8898		232.934	26.517	12.9772	45.7445	3.80339			259.002	4.96641
																	62.5	3.70216	2.89519	1.47678			233.533	5.71632	7.37715	78.8956	4.03222		233.533	4.71305	4.36231	6.15724	3.38473		233.533	11.4904	9.6821	76.2747	3.018		233.533	25.7005	13.9197	44.2749	3.99013			259.668	4.9023
																	62.6603	3.30672	4.41876	1.61726			234.132	5.80498	6.82568	83.4979	4.19284		234.132	4.54816	4.32923	6.30585	3.33121		234.132	12.2142	8.33308	67.3925	2.8695		234.132	26.4512	14.1032	44.6708	4.25826			260.333	5.0972
																	62.8205	4.10589	3.23875	1.56231			234.731	4.96793	7.26744	86.181	4.08775		234.731	4.88784	5.03883	6.19284	3.51681		234.731	10.4823	6.79529	61.1119	2.86707		234.731	24.3045	13.6303	52.4583	4.23046			260.999	5.28532
																	62.9808	4.10166	3.27643	1.70134			235.329	5.99433	6.7485	86.3195	4.02516		235.329	5.06781	5.31851	6.31725	3.24255		235.329	11.9801	8.82329	60.933	2.67319		235.329	25.5791	12.8714	58.6192	4.20947			261.665	4.83207
																	63.141	3.81786	2.84889	1.72331			235.928	5.00578	6.96044	80.6371	4.16765		235.928	5.45703	4.46681	6.68389	3.23762		235.928	12.028	8.79149	81.0536	2.86375		235.928	26.6224	14.2016	75.6242	4.14823			262.331	5.75041
																	63.3013	4.15982	3.08656	1.49995			236.527	5.86908	6.86908	78.3776	4.02673		236.527	4.90118	3.92292	6.03581	3.02272		236.527	11.9436	8.33782	78.0022	2.80112		236.527	27.0275	14.9047	70.5848	4.22365			262.997	4.36448
																	63.4615	3.71697	2.89913	1.59187			237.126	5.51768	7.67484	80.6909	4.16821		237.126	6.42136	4.37181	5.89432	3.36548		237.126	9.80496	6.73033	92.5967	2.69484		237.126	26.879	14.9134	66.1357	4.17809			263.663	4.78676
																	63.6218	3.64615	3.0578	1.62865			237.725	5.80191	6.59209	89.8378	4.30217		237.725	5.08369	4.0288	6.10628	3.08541		237.725	10.5912	7.8374	80.2202	2.89987		237.725	27.0309	14.7821	69.2782	4.11467			264.328	4.82866
																	63.7821	4.31912	3.56749	1.6192			238.323	4.74048	7.55078	77.2068	4.18885		238.323	5.52883	4.13688	6.14877	3.28209		238.323	10.6186	7.25021	57.0845	2.98563		238.323	24.4732	14.053	70.8519	4.01431			264.994	5.47104
																	63.9423	3.54938	2.96155	1.59247			238.922	6.32393	7.7636	79.9993	4.08584		238.922	4.73045	5.1401	6.1959	3.85447		238.922	9.08172	7.05549	62.0262	2.60727		238.922	24.6371	12.7787	70.6856	4.10491			265.66	4.47483
																	64.1026	4.11632	2.71135	1.55623			239.521	6.05194	5.7458	75.6944	4.23115		239.521	5.09381	4.39506	6.1642	4.04787		239.521	9.88127	7.64851	68.8214	2.60224		239.521	25.2743	13.0456	88.1143	3.89744			266.326	5.25012
																	64.2628	3.76803	3.40837	1.61051			240.12	4.90446	5.7299	76.5835	4.11794		240.12	4.68844	3.68256	6.0355	3.18769		240.12	10.2213	8.10915	67.2442	2.75184		240.12	24.8306	13.6179	94.3462	3.87189			266.992	5.30196
																	64.4231	3.89864	3.0549	1.72938			240.719	6.24862	6.10877	83.4584	4.09977		240.719	5.22267	4.44763	6.43062	3.82282		240.719	12.0777	7.12275	73.9406	2.68929		240.719	24.9312	12.1143	123.258	4.19839			267.657	5.14951
																	64.5833	4.01115	2.96334	1.64757			241.317	4.93632	7.11576	81.9264	4.17978		241.317	5.55887	4.51792	6.30678	4.23287		241.317	11.6454	8.18304	67.6406	2.84044		241.317	26.3353	13.6898	119.611	3.96511			268.323	5.40516
																	64.7436	3.69728	3.22273	1.6607			241.916	5.47252	7.34797	71.3608	4.16957		241.916	4.76276	4.95435	5.94088	3.76551		241.916	11.4446	7.5188	74.1479	2.88707		241.916	23.6533	12.4547	90.0535	4.15269			268.989	5.35331
																	64.9038	3.72814	2.86782	1.72697			242.515	6.51396	7.3031	72.4791	4.17894		242.515	4.49071	4.52634	6.1959	4.0264		242.515	10.8772	8.58123	93.9347	2.95449		242.515	26.0047	12.1941	85.0864	4.05848			269.655	5.1185
																	65.0641	3.65846	3.15702	1.60103			243.114	4.9483	7.72951	66.6108	4.06881		243.114	4.61844	4.107	6.04822	3.98123		243.114	10.4339	7.53138	75.9232	2.94277		243.114	26.6508	15.3913	84.6629	4.14044			270.321	4.75641
																	65.2244	3.52196	3.1138	1.64358			243.713	7.79579	6.97814	75.8825	4.16492		243.713	4.55793	4.86573	6.1196	3.50436		243.713	10.585	7.79557	94.7517	2.94432		243.713	26.829	14.0584	82.8317	4.02258			270.986	5.08341
																	65.3846	3.9759	3.89633	1.60682			244.311	5.81272	6.00192	65.5127	4.11319		244.311	5.04468	4.99435	5.82919	3.76846		244.311	9.58481	7.36264	93.4859	2.94338		244.311	26.5018	14.8752	82.0711	3.95041			271.652	4.93234
																	65.5449	3.84751	3.04209	1.73034			244.91	6.36642	6.55447	58.5613	4.19307		244.91	4.60322	4.53415	6.23071	3.94072		244.91	9.99845	7.68834	91.9229	2.97946		244.91	26.2186	14.7691	110.962	4.3199			272.318	5.2612
																	65.7051	3.77389	3.13307	1.54632			245.509	6.77925	7.57793	58.4391	4.22168		245.509	4.92082	4.97742	6.22248	3.66845		245.509	10.6652	7.38181	72.8772	2.99208		245.509	25.1118	13.8182	121.057	4.26166			272.984	5.04513
																	65.8654	4.07857	3.39886	1.68369			246.108	5.15722	7.24361	60.4385	4.20989		246.108	4.4252	4.67608	6.08937	3.66446		246.108	11.2076	8.10034	68.3656	3.09236		246.108	25.4863	14.7752	79.8756	3.95923			273.65	5.19492
																	66.0256	3.63341	3.09092	1.66953			246.707	6.22939	7.30063	70.6056	4.2973		246.707	4.27169	4.10991	6.27898	3.58838		246.707	11.5193	7.75073	61.9424	3.12485		246.707	25.2343	14.3623	79.0026	3.81485			274.316	5.36225
																	66.1859	3.99832	3.14057	1.59895			247.305	5.43403	7.18593	68.1469	4.24952		247.305	4.01389	4.19262	6.00142	3.45421		247.305	11.1928	7.71893	60.7659	2.91353		247.305	25.0379	13.5179	74.6887	4.00196			274.981	5.1935
																	66.3462	4.24641	3.11686	1.64952			247.904	5.72559	6.90013	63.5707	4.3022		247.904	4.59941	4.18229	6.05027	3.45949		247.904	10.0405	7.21027	74.266	3.06976		247.904	26.4515	14.1486	104.156	4.17063			275.647	4.89036
																	66.5064	3.73247	3.19092	1.69054			248.503	5.31253	7.08981	59.3473	4.20846		248.503	4.74575	4.71782	6.3135	4.22556		248.503	11.3956	7.80329	77.5882	3.00482		248.503	26.1586	13.1558	88.6599	4.13332			276.313	4.6123
																	66.6667	4.18521	3.25591	1.7261			249.102	5.41429	7.67972	70.647	4.26113		249.102	4.82779	5.13327	6.75577	3.82449		249.102	11.1759	7.78063	83.6026	3.11197		249.102	26.9413	13.1538	73.4404	4.16893			276.979	4.78045
																	66.8269	3.68307	2.90616	1.57039			249.701	6.03074	6.93063	78.8294	4.22157		249.701	4.91957	4.29233	5.86807	3.56849		249.701	9.95158	7.73459	97.0903	2.92134		249.701	24.776	13.1113	68.9003	4.03501			277.645	4.86919
																	66.9872	4.29537	2.8941	1.54191			250.299	5.34917	8.03348	68.4893	4.29145		250.299	4.91024	4.78048	7.22531	3.62728		250.299	10.3367	7.14642	85.2514	3.43333		250.299	25.9943	13.9574	77.423	4.06654			278.31	5.23245
																	67.1474	4.38683	2.6888	1.57579			250.898	5.15195	8.58099	69.3689	3.94719		250.898	4.89752	4.46603	6.28331	3.54799		250.898	13.0484	7.78053	86.6069	3.31347		250.898	25.6142	14.1044	78.3613	4.15352			278.976	4.87877
																	67.3077	3.57838	2.91637	1.53043			251.497	5.86131	7.30422	68.0209	4.00197		251.497	4.54854	4.35208	6.6193	3.51901		251.497	9.91439	6.89708	79.2115	2.95482		251.497	25.9681	14.4449	72.7245	3.93863			279.642	4.85996
																	67.4679	3.62603	3.57696	1.73616			252.096	5.07947	7.40394	62.5397	4.20941		252.096	4.23892	4.24166	5.88426	3.68261		252.096	10.9782	7.60966	78.6845	2.74904		252.096	27.0287	15.5694	72.9539	4.21382			280.308	4.93746
																	67.6282	3.86048	2.95191	1.64198			252.695	5.32371	8.40691	67.6906	4.22606		252.695	4.16149	3.31702	5.80018	3.60083		252.695	11.2082	8.29959	80.1049	2.93679		252.695	25.8518	14.2164	69.8416	4.11263			280.974	4.66712
																	67.7885	4.25703	2.83659	1.61362			253.293	5.43555	7.9779	68.9644	4.28057		253.293	4.92598	4.95923	6.64394	3.80595		253.293	12.0773	8.17434	79.8789	3.23208		253.293	26.4599	14.8621	69.4253	4.02647			281.64	4.332
																	67.9487	3.5421	3.14725	1.60965			253.892	5.20118	9.03449	71.9581	4.33354		253.892	4.53325	5.09087	6.67626	3.40288		253.892	11.2537	8.57117	78.8426	2.91823		253.892	27.5527	15.2318	72.468	4.46624			282.305	4.72859
																	68.109	4.0278	3.28813	1.73542			254.491	5.98237	9.37644	71.0647	4.28729		254.491	4.71822	5.29707	6.51819	3.60364		254.491	11.0206	6.9478	83.1268	3.12575		254.491	26.5697	14.4009	75.7725	4.19424			282.971	5.18516
																	68.2692	4.26945	3.24975	1.63987			255.09	6.14862	8.34718	63.5359	4.34002		255.09	4.41621	4.614	6.21957	4.0216		255.09	10.3157	8.26102	92.0129	2.86299		255.09	25.2162	13.7689	78.4122	4.03752			283.637	4.89494
																	68.4295	3.88973	2.94396	1.59999			255.689	5.82216	7.97738	64.6308	4.38188		255.689	4.56803	4.83866	7.2891	3.82581		255.689	9.93985	6.90117	91.2814	3.01545		255.689	26.3286	14.014	76.6013	4.33024			284.303	4.85062
																	68.5897	3.81081	2.92413	1.70492			256.287	6.1296	8.53954	83.4465	4.41593		256.287	4.92746	4.75785	7.03855	3.8488		256.287	11.7225	8.21962	87.2236	2.97009		256.287	24.0573	14.4239	72.3693	4.31381			284.969	5.09354
																	68.75	4.25281	2.90352	1.61227			256.886	5.04371	8.29729	74.334	4.33797		256.886	4.17987	3.28633	7.18176	4.12566		256.886	11.3792	7.42523	85.0649	3.12507		256.886	23.3044	13.1998	77.4454	4.21599			285.634	5.1966
																	68.9103	3.83842	3.0806	1.70572			257.485	5.60694	8.54554	79.3872	4.43283		257.485	3.79964	3.82733	8.79695	3.41098		257.485	9.98282	7.14875	93.2983	2.9194		257.485	22.9372	12.9235	83.119	4.1769			286.3	5.05415
																	69.0705	4.42756	2.81751	1.66194			258.084	4.99578	9.46618	92.6277	4.37951		258.084	4.28665	3.82453	6.26721	3.71692		258.084	11.2089	7.67643	102.701	3.06136		258.084	25.4012	13.0266	84.4719	4.13762			286.966	5.10334
																	69.2308	4.08874	2.92517	1.60443			258.683	6.07383	7.67952	90.095	4.49632		258.683	3.66875	4.04853	6.40602	3.82659		258.683	10.9751	7.01525	93.3605	3.119		258.683	24.5758	13.6479	86.8302	4.3448			287.632	4.85063
																	69.391	3.74351	3.06693	1.61872			259.281	4.83132	8.01555	89.3493	4.47864		259.281	3.66315	3.56274	6.18077	3.81164		259.281	10.4342	7.00661	90.9386	3.03322		259.281	26.1407	12.9694	86.8892	4.27892			288.298	5.36652
																	69.5513	3.60667	3.22248	1.64663			259.88	6.09907	7.81563	91.5546	4.31491		259.88	4.03984	3.26171	6.30329	3.84366		259.88	10.9955	7.98081	95.3229	2.98324		259.88	24.0966	12.4416	84.8698	4.42198			288.963	4.95232
																	69.7115	4.30879	2.95992	1.68231			260.479	6.19901	7.24346	92.0935	4.26771		260.479	3.63397	3.92717	6.34363	3.57861		260.479	10.2821	7.50009	91.9322	3.04392		260.479	25.5324	13.6823	85.2091	4.35309			289.629	5.90942
																	69.8718	4.52759	2.94161	1.61555			261.078	5.6395	8.29404	97.2429	4.38747		261.078	4.32333	3.89881	6.252	3.50481		261.078	8.7003	6.95393	65.9699	3.00195		261.078	26.6764	14.1735	84.739	4.0674			290.295	5.19997
																	70.0321	4.03532	2.80247	1.66543			261.677	5.74667	7.59583	95.8793	4.23821		261.677	4.2056	3.28461	5.93785	3.32924		261.677	9.58275	6.95725	90.5165	3.07879		261.677	26.6544	13.9869	92.8039	4.04518			290.961	5.22376
																	70.1923	4.64324	2.90758	1.61644			262.275	6.18502	7.3549	94.6104	4.32695		262.275	4.19792	3.72368	6.26293	3.44843		262.275	11.6937	7.2505	93.9154	3.22725		262.275	26.2277	13.8921	80.6563	4.34325			291.627	4.72564
																	70.3526	3.73856	2.89506	1.61936			262.874	5.29343	8.59858	93.212	4.46546		262.874	3.76705	3.7487	7.16531	3.54971		262.874	11.0987	7.6808	85.2888	3.19388		262.874	25.7913	14.4432	79.9929	3.76908			292.293	5.00203
																	70.5128	3.68586	2.93263	1.60686			263.473	5.31987	7.82048	83.6238	4.34003		263.473	3.72109	3.6039	6.54694	3.89742		263.473	10.5336	7.81586	90.96	2.74819		263.473	26.2391	14.1091	81.8951	4.14314			292.958	5.21695
																	70.6731	4.38592	2.97927	1.69123			264.072	5.07707	8.18034	86.328	4.29078		264.072	3.7857	3.82419	5.95061	3.36546		264.072	11.5577	6.97315	93.7371	2.63789		264.072	25.0209	13.5178	73.987	4.11503			293.624	5.04464
																	70.8333	3.8671	2.87036	1.55147			264.671	5.52453	7.66072	88.3344	4.14925		264.671	4.94724	3.69882	5.85618	3.34686		264.671	11.0459	6.92176	82.595	2.72059		264.671	24.9788	14.2452	75.0882	4.02249			294.29	6.61379
																	70.9936	4.0868	3.05123	1.50565			265.269	5.65753	7.12919	85.5246	4.4241		265.269	3.38551	3.20089	6.19085	3.61214		265.269	9.86562	8.67888	70.6554	2.99668		265.269	26.5703	15.0983	74.8127	4.04787			294.956	5.22905
																	71.1538	3.98575	2.96387	1.66652			265.868	5.80532	7.08016	90.5403	4.41306		265.868	3.78184	4.38403	5.92536	3.3102		265.868	12.5005	7.55899	66.1989	2.79404		265.868	23.3762	13.5429	73.4128	4.24117			295.622	5.58706
																	71.3141	4.29966	3.35744	1.71894			266.467	5.51666	5.82772	104.012	4.25989		266.467	3.92272	3.9595	6.17046	3.55128		266.467	12.7589	8.77548	71.8743	3.028		266.467	23.2935	13.4515	76.6237	4.29252			296.287	4.79273
																	71.4744	4.16328	2.93934	1.65671			267.066	5.47448	6.00846	81.5138	4.28735		267.066	3.37899	4.63019	6.18074	3.68477		267.066	11.253	8.84946	66.3706	3.14465		267.066	23.8205	13.7096	81.1629	4.20947			296.953	4.64493
																	71.6346	4.71114	2.89357	1.62618			267.665	5.37633	7.45215	68.0272	4.07761		267.665	4.18506	4.06374	6.2377	3.72803		267.665	12.36	8.62294	70.7671	2.92492		267.665	23.2737	13.1031	74.8011	4.10316			297.619	6.1397
																	71.7949	3.31584	2.81995	1.59674			268.263	5.37476	7.20244	70.8931	4.16011		268.263	4.91188	3.41285	8.06891	3.57176		268.263	11.3859	7.29335	76.3325	2.89335		268.263	24.4959	13.8654	81.7586	4.19874			298.285	5.02571
																	71.9551	3.93586	2.94078	1.60675			268.862	7.13614	6.70072	93.582	4.10528		268.862	4.2095	3.88915	6.61563	3.64917		268.862	11.8313	7.0897	78.9725	3.01413		268.862	23.8857	13.9388	101.187	4.35131			298.951	5.86344
																	72.1154	3.92812	2.87272	1.70535			269.461	5.29001	7.27671	92.2427	4.09852		269.461	4.01217	3.75089	6.60049	3.80905		269.461	9.74431	7.18528	79.2804	3.10968		269.461	24.3134	13.2987	115.754	4.44542			299.616	5.21596
																	72.2756	4.00235	2.93216	1.69808			270.06	5.74504	6.82377	102.553	3.90691		270.06	4.00741	3.97636	6.25028	3.58946		270.06	11.7787	7.01226	78.0408	2.99295		270.06	24.2644	12.4758	81.5335	4.31977			300.282	4.86281
																	72.4359	4.01196	2.93835	1.64629			270.659	6.47683	7.1623	119.149	3.87572		270.659	3.45995	4.09004	5.87547	3.66328		270.659	11.602	8.35545	66.3542	3.14475		270.659	25.0009	13.683	113.739	4.44627
																	72.5962	4.03825	3.22123	1.5966			271.257	4.95483	7.03706	86.3514	4.15765		271.257	3.76498	4.2633	7.78146	3.30774		271.257	11.2899	8.23546	64.344	3.26901		271.257	25.7614	14.2805	90.5036	4.39451
																	72.7564	3.74894	2.95252	1.52166			271.856	5.72036	5.59075	74.6882	4.15655		271.856	3.96839	3.47446	7.13881	3.4224		271.856	11.0062	7.51802	65.5371	2.87892		271.856	25.8519	15.4081	106.558	4.5086
																	72.9167	3.57255	2.76957	1.68622			272.455	5.48226	6.66661	80.5025	4.1732		272.455	3.78465	4.04506	7.11186	3.26237		272.455	12.5174	9.83463	66.1527	3.03777		272.455	25.5331	14.5946	113.018	4.43364
																	73.0769	3.59845	3.11767	1.55012			273.054	4.97656	5.33697	78.835	4.10389		273.054	4.03967	3.7081	6.02231	3.18249		273.054	12.9148	10.1867	48.9185	3.09262		273.054	23.5711	14.0735	102.377	4.4157
																	73.2372	3.83776	2.94717	1.52574			273.653	4.93175	3.95579	87.0217	4.16553		273.653	4.68128	3.51766	5.83064	3.54332		273.653	14.4431	11.027	55.0743	2.91741		273.653	24.8643	13.9807	106.403	4.39049
																	73.3974	4.09953	2.96792	1.61768			274.251	4.64537	5.19951	79.6314	4.37234		274.251	4.55654	3.50308	6.51467	3.87906		274.251	14.0651	10.7394	74.7682	2.90979		274.251	24.2869	13.3334	113.152	4.2199
																	73.5577	3.62888	3.3835	1.69084			274.85	5.33202	5.78321	82.9085	4.27822		274.85	4.04656	3.65739	6.34204	3.27052		274.85	15.4001	11.7994	58.1907	3.16964		274.85	23.8377	12.071	96.9534	4.28233
																	73.7179	3.94863	3.06934	1.63143			275.449	4.69217	4.94148	77.2753	4.22992		275.449	3.65039	3.82343	6.08454	3.60707		275.449	16.2952	13.2513	48.0343	3.08183		275.449	24.6433	13.7894	91.7713	4.15314
																	73.8782	3.37963	3.09061	1.57703			276.048	5.84826	5.35579	71.7797	4.37339		276.048	3.78412	4.29387	6.91669	3.76499		276.048	17.7966	13.8148	57.1393	2.95782		276.048	25.4024	13.8793	88.5061	4.28994
																	74.0385	3.99266	3.1783	1.64725			276.647	4.70356	6.36266	73.1855	4.48003		276.647	5.41038	3.45158	7.27417	3.49473		276.647	17.3024	14.5975	50.8	3.03648		276.647	24.6881	13.4724	80.949	4.09967
																	74.1987	4.25871	3.02605	1.58825			277.246	5.69991	4.16027	67.9184	4.45429		277.246	4.24868	3.78897	6.10836	4.13521		277.246	16.0291	13.34	45.9488	2.93034		277.246	25.3927	12.762	84.5925	4.31292
																	74.359	3.54126	2.90976	1.63478			277.844	5.56705	5.8187	71.2509	4.45093		277.844	4.40435	4.19142	5.94951	4.1245		277.844	16.4407	13.761	66.7722	2.87342		277.844	24.9195	12.8112	86.5199	3.98229
																	74.5192	4.39761	3.0561	1.58688			278.443	4.586	4.59293	118.392	4.38924		278.443	4.09928	3.84176	5.93691	4.04962		278.443	16.5165	14.4361	66.8005	2.89586		278.443	25.9936	14.0053	76.9623	4.26042
																	74.6795	4.01551	3.07104	1.64701			279.042	4.90805	5.03327	93.8351	4.46707		279.042	4.71273	4.69903	6.09068	3.23663		279.042	16.8205	14.6698	61.5429	2.6476		279.042	27.7296	14.9058	86.4558	4.32848
																	74.8397	5.02607	3.30294	1.57912			279.641	5.26847	6.48968	88.4073	4.61574		279.641	4.44459	4.41908	7.71103	3.80164		279.641	16.6675	13.3444	68.2143	3.12484		279.641	25.7223	13.5763	73.0007	4.23581
																	75	4.27579	2.85487	1.60342			280.24	5.72916	5.38113	89.0054	4.6597		280.24	4.33528	4.52217	6.6415	3.81801		280.24	16.2503	13.1929	60.3259	3.02982		280.24	27.8289	14.8582	94.0506	4.05825
																	75.1603	3.95468	2.96179	1.58011			280.838	6.44522	5.50884	96.9025	4.66411		280.838	5.03187	4.23834	5.97266	3.97522		280.838	16.5862	15.5849	64.4158	2.82866		280.838	25.3748	13.1438	89.4908	4.13677
																	75.3205	4.13428	2.99806	1.6982			281.437	7.07377	3.96517	96.5844	4.52085		281.437	4.75897	4.46401	6.1135	3.5729		281.437	16.5584	14.5585	64.2227	3.06281		281.437	25.9808	14.4305	105.679	4.0814
																	75.4808	3.8281	3.17589	1.56011			282.036	4.88637	3.51037	90.571	4.51298		282.036	4.80404	3.82208	5.83931	3.74915		282.036	16.4874	14.8731	47.4786	2.99376		282.036	25.5701	13.2222	79.368	3.93775
																	75.641	3.92758	2.79902	1.6581			282.635	4.87507	4.38428	79.6345	4.45334		282.635	4.51051	6.03971	5.95236	4.0248		282.635	16.5011	14.6175	25.1471	2.86177		282.635	26.09	14.9675	111.735	4.13023
																	75.8013	4.75179	3.16551	1.6067			283.234	4.86125	3.97	76.4803	4.42055		283.234	4.71117	4.27106	5.73026	3.81581		283.234	16.8204	14.6625	23.4838	2.83794		283.234	26.6741	13.8925	71.7204	4.27172
																	75.9615	3.41984	3.05342	1.53217			283.832	5.55588	3.91862	79.2192	4.23347		283.832	5.1946	3.36951	5.74686	3.47674		283.832	17.9316	13.8589	25.4126	2.79926		283.832	27.681	16.0368	73.1908	4.08301
																	76.1218	4.11256	2.84725	1.60855			284.431	4.7933	5.61625	75.8334	4.47925		284.431	4.8397	4.50262	5.9121	3.72072		284.431	16.6211	14.4934	31.563	2.96151		284.431	26.0955	13.8751	76.198	4.03341
																	76.2821	4.38007	2.90091	1.59563			285.03	5.33717	3.55361	86.6342	4.53704		285.03	5.01157	4.98945	5.84095	3.1927		285.03	17.1739	14.2421	40.5763	2.78079		285.03	25.0538	14.0918	76.0298	4.09817
																	76.4423	3.74475	2.77934	1.6015			285.629	5.79688	6.03278	90.2383	4.56864		285.629	5.27367	5.26774	5.74668	3.38509		285.629	16.2797	14.0285	35.0265	2.73317		285.629	24.7818	13.9494	75.9869	4.17673
																	76.6026	3.74978	3.21747	1.68212			286.228	5.16449	4.71111	94.1875	4.49429		286.228	4.86523	4.66625	5.88678	3.84975		286.228	17.4296	13.7811	50.1518	2.79963		286.228	26.0962	14.4484	78.0982	3.97656
																	76.7628	3.5078	3.5414	1.69512			286.826	5.75237	5.98733	101.14	4.26589		286.826	5.09786	4.75499	5.37077	4.06979		286.826	16.4889	14.334	50.7683	2.70887		286.826	25.9821	13.585	69.7709	4.15112
																	76.9231	3.712	3.02388	1.65699			287.425	6.09401	6.13464	100.589	4.5971		287.425	5.02639	4.05734	5.8823	3.91063		287.425	16.6643	12.8608	59.9456	3.05029		287.425	24.3967	13.5746	80.4815	3.98726
																	77.0833	4.18089	2.93255	1.71964			288.024	4.94163	5.1479	99.4316	4.41499		288.024	5.12184	4.26733	5.78467	3.73806		288.024	17.1669	13.4919	61.785	3.13274		288.024	24.2683	14.3403	98.1861	4.09007
																	77.2436	3.67523	3.01324	1.66594			288.623	4.84892	4.68964	103.252	4.27515		288.623	5.13269	5.30553	5.50043	4.03036		288.623	16.7249	13.0466	70.6011	2.96264		288.623	26.2098	15.1595	106.74	3.97826
																	77.4038	3.73726	3.05199	1.6804			289.222	5.77614	5.8114	109.672	4.05343		289.222	4.78532	4.50105	5.7314	3.62342		289.222	18.0638	14.2	75.3612	3.35474		289.222	25.8585	15.5779	90.7707	4.09633
																	77.5641	4.13321	3.13448	1.70969			289.82	5.3646	6.13562	115.378	4.44596		289.82	4.7071	4.6815	5.9298	4.02199		289.82	18.1736	15.6795	77.1256	3.251		289.82	23.0215	14.2993	109.62	4.22775
																	77.7244	3.9382	2.90965	1.70219			290.419	5.4294	5.75203	84.564	4.16168		290.419	5.06665	5.08671	5.64171	3.83851		290.419	16.8725	14.2241	82.7634	3.28229		290.419	24.1773	13.1099	98.9961	4.09472
																	77.8846	4.04869	2.86108	1.57985			291.018	5.21794	5.46484	102.47	4.27631		291.018	5.72456	4.28811	5.46146	3.89415		291.018	16.1552	14.3721	73.364	3.20052		291.018	25.2153	14.7629	108.52	4.14708
																	78.0449	4.20641	2.77077	1.58113			291.617	5.33968	5.62308	102.325	4.16192		291.617	4.72472	4.18025	5.89882	3.5338		291.617	17.8034	14.0951	60.9979	3.0833		291.617	26.7279	15.4792	81.2527	4.28533
																	78.2051	3.99273	3.06782	1.61311			292.216	5.4034	5.50931	102.829	4.27469		292.216	4.61034	5.24518	5.4528	3.77822		292.216	19.3166	15.1675	60.9902	3.00819		292.216	25.8994	12.9341	114.882	4.13905
																	78.3654	4.16539	3.37924	1.72433			292.814	5.46197	5.29057	108.098	4.31394		292.814	4.66122	3.77504	5.73592	3.65387		292.814	16.3221	14.2521	51.1324	3.16866		292.814	27.0308	13.0511	99.8794	4.43088
																	78.5256	3.69633	2.81186	1.78196			293.413	5.14692	3.53882	105.999	4.18453		293.413	5.38193	3.74661	5.73834	4.02457		293.413	16.2946	14.8011	40.4269	3.26947		293.413	25.5259	13.4796	94.0132	4.15588
																	78.6859	4.07401	2.87859	1.58156			294.012	6.10837	3.89329	103.918	4.39521		294.012	5.04373	3.68392	5.89494	3.85618		294.012	16.8395	14.4447	36.003	3.09758		294.012	26.6441	13.7263	109.798	4.15776
																	78.8462	3.87553	2.90423	1.58568			294.611	5.37425	4.18397	83.6318	4.30912		294.611	5.50342	3.71228	5.90753	3.38351		294.611	16.6476	14.4009	44.0818	2.98759		294.611	26.1752	15.0054	104.719	4.76219
																	79.0064	4.12588	2.77796	1.63932			295.21	5.54229	4.12002	89.2842	4.24075		295.21	4.43355	4.54287	5.71863	3.64807		295.21	17.1325	13.9018	54.1354	3.07602		295.21	26.3307	16.0746	98.2507	4.30271
																	79.1667	3.96917	3.6688	1.62831			295.808	5.57427	4.8304	94.2886	4.2551		295.808	4.74451	4.4278	5.90999	3.58361		295.808	16.6634	13.7841	59.0292	3.14071		295.808	24.1285	13.8139	96.7024	4.11833
																	79.3269	3.78998	2.94518	1.64784			296.407	4.62952	4.41858	94.1097	4.35782		296.407	4.45329	3.76846	5.80429	3.45507		296.407	17.4461	14.4267	54.7905	3.3664		296.407	25.0382	13.2096	90.7447	4.39949
																	79.4872	4.09492	2.93762	1.63261			297.006	5.17634	4.14248	106.044	4.32344		297.006	4.55816	4.12998	5.64934	3.32991		297.006	15.8313	14.2825	76.8975	3.43621		297.006	25.6441	14.217	80.1895	4.78017
																	79.6474	3.95315	3.02829	1.61522			297.605	5.08228	3.51035	113.595	4.11943		297.605	4.80187	5.03251	5.85519	3.42071		297.605	17.8415	14.7693	80.6482	3.74236		297.605	24.6741	14.462	58.9801	4.10414
																	79.8077	4.28092	3.46121	1.65928			298.204	4.9066	3.6387	112.089	4.18695		298.204	4.89449	4.05495	5.66031	3.75788		298.204	16.6436	14.9153	88.458	3.21713		298.204	26.224	15.4544	71.4818	4.0811
																	79.9679	4.22025	3.24472	1.63299			298.802	5.33273	5.50788	95.4699	4.12274		298.802	4.80096	4.82156	5.53323	3.92437		298.802	17.0392	14.4595	94.1139	3.50928		298.802	24.6585	13.8999	63.9897	4.1935
																	80.1282	3.67248	3.19921	1.6354			299.401	5.38431	5.64328	76.0752	4.12178		299.401	5.06203	4.63974	5.34229	3.40603		299.401	17.7862	14.617	90.3028	3.56318		299.401	24.3773	13.8805	73.733	4.01133
																	80.2885	3.8155	3.27939	1.64934			300	4.58015	4.70303	67.5149	4.1328		300	5.15882	5.51374	5.58301	3.19978		300	17.3987	14.1642	93.8629	3.71187		300	24.9436	13.3911	76.0454	4.11778
																	80.4487	3.34854	3.02981	1.71761																					300.599	25.0992	14.54	77.5033	4.09299
																	80.609	4.03147	2.96597	1.65365
																	80.7692	3.6239	2.76994	1.62798
																	80.9295	3.50528	2.90175	1.62319
																	81.0897	3.77706	3.06582	1.66382
																	81.25	3.70771	3.34291	1.66732
																	81.4103	4.09596	3.1335	1.63673
																	81.5705	4.34013	3.1185	1.7333
																	81.7308	3.55403	3.06728	1.66677
																	81.891	3.93364	3.2958	1.59466
																	82.0513	3.65456	3.11105	1.68023
																	82.2115	3.80525	2.89542	1.64675
																	82.3718	3.63347	3.25211	1.62141
																	82.5321	3.34403	3.44597	1.65865
																	82.6923	3.31263	3.02514	1.61929
																	82.8526	3.89956	2.83185	1.57647
																	83.0128	3.68645	2.98065	1.71209
																	83.1731	3.43474	3.06005	1.60754
																	83.3333	4.019	3.19874	1.61458
																	83.4936	3.50973	2.99035	1.66515
																	83.6538	3.69642	3.07885	1.61656
																	83.8141	3.74373	3.26799	1.5714
																	83.9744	3.75132	3.00806	1.70347
																	84.1346	3.56061	2.8172	1.61
																	84.2949	3.57913	3.11773	1.6244
																	84.4551	4.19276	2.70533	1.61063
																	84.6154	4.24304	2.872	1.66972
																	84.7756	4.33474	2.82042	1.60257
																	84.9359	3.62442	2.94637	1.70595
																	85.0962	3.89852	2.93754	1.64286
																	85.2564	3.69726	2.86023	1.72791
																	85.4167	3.75312	2.79541	1.68151
																	85.5769	3.59764	3.1105	1.65798
																	85.7372	3.4409	3.14287	1.65876
																	85.8974	3.96066	2.92128	1.78997
																	86.0577	3.97881	3.05732	1.63754
																	86.2179	3.90497	3.00094	1.72248
																	86.3782	3.28503	3.21658	1.58639
																	86.5385	4.20887	3.06368	1.61294
																	86.6987	3.61567	2.94582	1.63017
																	86.859	3.73136	2.82854	1.66052
																	87.0192	3.81614	2.91838	1.59925
																	87.1795	4.02642	3.0658	1.62756
																	87.3397	3.60699	2.79404	1.56943
																	87.5	3.94488	3.14778	1.60548
																	87.6603	3.51842	2.86054	1.63494
																	87.8205	4.61708	2.89666	1.58174
																	87.9808	3.74816	3.10479	1.67606
																	88.141	3.76156	2.86278	1.64418
																	88.3013	3.82656	2.9181	1.57145
																	88.4615	4.0406	3.84679	1.5978
																	88.6218	3.78306	3.05791	1.60947
																	88.7821	3.53051	3.33788	1.75353
																	88.9423	3.86537	2.86455	1.62345
																	89.1026	3.80937	2.92	1.74286
																	89.2628	4.2161	3.83479	1.66151
																	89.4231	4.11579	2.87524	1.66135
																	89.5833	3.9726	3.36002	1.67985
																	89.7436	3.62925	2.93079	1.73725
																	89.9038	3.6131	3.35697	1.69288
																	90.0641	3.59868	2.93532	1.78039
																	90.2244	4.26047	3.06546	1.88078
																	90.3846	3.87324	3.21967	1.69451
																	90.5449	4.06819	2.79325	1.69112
																	90.7051	3.784	2.84311	1.66767
																	90.8654	3.726	3.44524	1.61368
																	91.0256	4.11393	3.02183	1.69617
																	91.1859	3.77417	2.91163	1.73799
																	91.3462	3.47297	3.29989	1.75499
																	91.5064	4.49939	2.86579	1.71088
																	91.6667	3.40511	3.0878	1.73272
																	91.8269	3.47875	3.11049	1.77457
																	91.9872	4.64601	3.21611	1.73915
																	92.1474	3.74164	3.37032	1.81717
																	92.3077	4.27741	2.79581	1.8107
																	92.4679	4.00608	2.90795	1.64256
																	92.6282	3.52333	3.34293	1.82564
																	92.7885	3.67679	3.0994	1.76554
																	92.9487	3.5604	2.8726	1.80817
																	93.109	4.6199	2.85347	1.75734
																	93.2692	4.10223	2.93603	1.82636
																	93.4295	3.85797	3.17358	1.8905
																	93.5897	4.13776	3.39363	1.85532
																	93.75	3.67194	3.40467	1.83301
																	93.9103	4.09699	3.32831	1.74138
																	94.0705	3.70406	3.12364	1.79983
																	94.2308	3.85256	3.03439	1.83662
																	94.391	3.73668	2.9012	1.80541
																	94.5513	3.82991	2.88489	1.84201
																	94.7115	3.49695	3.19132	1.80796
																	94.8718	3.65688	2.84628	1.77787
																	95.0321	3.84522	2.83603	1.82722
																	95.1923	3.8696	3.06707	1.85291
																	95.3526	3.87514	2.8662	1.71779
																	95.5128	3.94483	2.77779	1.69348
																	95.6731	3.78878	2.81507	1.64351
																	95.8333	3.94582	2.97699	1.7403
																	95.9936	3.89248	2.97768	1.73874
																	96.1538	3.81591	2.97619	1.76161
																	96.3141	3.85516	2.94665	1.77689
																	96.4744	3.73918	3.22035	1.70999
																	96.6346	3.63535	2.96245	1.78637
																	96.7949	4.03543	4.28031	1.71082
																	96.9551	3.88666	2.92095	1.81034
																	97.1154	4.06459	2.97755	1.90414
																	97.2756	4.13424	2.81952	1.793
																	97.4359	4.03792	3.09607	1.76314
																	97.5962	3.64567	3.08142	1.78439
																	97.7564	3.5706	2.97774	1.78683
																	97.9167	3.6041	2.94899	1.79333
																	98.0769	3.59791	3.16603	1.72284
																	98.2372	3.57972	2.91785	1.71888
																	98.3974	3.69984	2.79138	1.77406
																	98.5577	3.74448	3.15309	1.68538
																	98.7179	3.38595	2.73752	1.68892
																	98.8782	4.08317	2.87817	1.81792
																	99.0385	3.95935	3.11855	1.64787
																	99.1987	4.26116	3.01013	1.6463
																	99.359	3.6156	3.11126	1.63976
																	99.5192	3.60387	3.02588	1.70932
																	99.6795	4.00027	2.96522	1.71738
																	99.8397	3.67366	2.91209	1.67276
																	100	4.57508	3.10983	1.87779
[truncated: 18 more columns]

## Sheet: Sheet2
	0	0
	1	0.598802
	2	1.1976
	3	1.79641
	4	2.39521
	5	2.99401
	6	3.59281
	7	4.19162
	8	4.79042
	9	5.38922
	10	5.98802
	11	6.58683
	12	7.18563
	13	7.78443
	14	8.38323
	15	8.98204
	16	9.58084
	17	10.1796
	18	10.7784
	19	11.3772
	20	11.976
	21	12.5749
	22	13.1737
	23	13.7725
	24	14.3713
	25	14.9701
	26	15.5689
	27	16.1677
	28	16.7665
	29	17.3653
	30	17.9641
	31	18.5629
	32	19.1617
	33	19.7605
	34	20.3593
	35	20.9581
	36	21.5569
	37	22.1557
	38	22.7545
	39	23.3533
	40	23.9521
	41	24.5509
	42	25.1497
	43	25.7485
	44	26.3473
	45	26.9461
	46	27.5449
	47	28.1437
	48	28.7425
	49	29.3413
	50	29.9401
	51	30.5389
	52	31.1377
	53	31.7365
	54	32.3353
	55	32.9341
	56	33.5329
	57	34.1317
	58	34.7305
	59	35.3293
	60	35.9281
	61	36.5269
	62	37.1257
	63	37.7246
	64	38.3234
	65	38.9222
	66	39.521
	67	40.1198
	68	40.7186
	69	41.3174
	70	41.9162
	71	42.515
	72	43.1138
	73	43.7126
	74	44.3114
	75	44.9102
	76	45.509
	77	46.1078
	78	46.7066
	79	47.3054
	80	47.9042
	81	48.503
	82	49.1018
	83	49.7006
	84	50.2994
	85	50.8982
	86	51.497
	87	52.0958
	88	52.6946
	89	53.2934
	90	53.8922
	91	54.491
	92	55.0898
	93	55.6886
	94	56.2874
	95	56.8862
	96	57.485
	97	58.0838
	98	58.6826
	99	59.2814
	100	59.8802
	101	60.479
	102	61.0778
	103	61.6766
	104	62.2754
	105	62.8743
	106	63.4731
	107	64.0719
	108	64.6707
	109	65.2695
	110	65.8683
	111	66.4671
	112	67.0659
	113	67.6647
	114	68.2635
	115	68.8623
	116	69.4611
	117	70.0599
	118	70.6587
	119	71.2575
	120	71.8563
	121	72.4551
	122	73.0539
	123	73.6527
	124	74.2515
	125	74.8503
	126	75.4491
	127	76.0479
	128	76.6467
	129	77.2455
	130	77.8443
	131	78.4431
	132	79.0419
	133	79.6407
	134	80.2395
	135	80.8383
	136	81.4371
	137	82.0359
	138	82.6347
	139	83.2335
	140	83.8323
	141	84.4311
	142	85.0299
	143	85.6287
	144	86.2275
	145	86.8263
	146	87.4251
	147	88.024
	148	88.6228
	149	89.2216
	150	89.8204
	151	90.4192
	152	91.018
	153	91.6168
	154	92.2156
	155	92.8144
	156	93.4132
	157	94.012
	158	94.6108
	159	95.2096
	160	95.8084
	161	96.4072
	162	97.006
	163	97.6048
	164	98.2036
	165	98.8024
	166	99.4012
	167	100
	168	100.599
	169	101.198
	170	101.796
	171	102.395
	172	102.994
	173	103.593
	174	104.192
	175	104.79
	176	105.389
	177	105.988
	178	106.587
	179	107.186
	180	107.784
	181	108.383
	182	108.982
	183	109.581
	184	110.18
	185	110.778
	186	111.377
	187	111.976
	188	112.575
	189	113.174
	190	113.772
	191	114.371
	192	114.97
	193	115.569
	194	116.168
	195	116.766
	196	117.365
	197	117.964
	198	118.563
	199	119.162
	200	119.76
	201	120.359
	202	120.958
	203	121.557
	204	122.156
	205	122.754
	206	123.353
	207	123.952
	208	124.551
	209	125.15
	210	125.749
	211	126.347
	212	126.946
	213	127.545
	214	128.144
	215	128.743
	216	129.341
	217	129.94
	218	130.539
	219	131.138
	220	131.737
	221	132.335
	222	132.934
	223	133.533
	224	134.132
	225	134.731
	226	135.329
	227	135.928
	228	136.527
	229	137.126
	230	137.725
	231	138.323
	232	138.922
	233	139.521
	234	140.12
	235	140.719
	236	141.317
	237	141.916
	238	142.515
	239	143.114
	240	143.713
	241	144.311
	242	144.91
	243	145.509
	244	146.108
	245	146.707
	246	147.305
	247	147.904
	248	148.503
	249	149.102
	250	149.701
	251	150.299
	252	150.898
	253	151.497
	254	152.096
	255	152.695
	256	153.293
	257	153.892
	258	154.491
	259	155.09
	260	155.689
	261	156.287
	262	156.886
	263	157.485
	264	158.084
	265	158.683
	266	159.281
	267	159.88
	268	160.479
	269	161.078
	270	161.677
	271	162.275
	272	162.874
	273	163.473
	274	164.072
	275	164.671
	276	165.269
	277	165.868
	278	166.467
	279	167.066
	280	167.665
	281	168.263
	282	168.862
	283	169.461
	284	170.06
	285	170.659
	286	171.257
	287	171.856
	288	172.455
	289	173.054
	290	173.653
	291	174.251
	292	174.85
	293	175.449
	294	176.048
	295	176.647
	296	177.246
	297	177.844
	298	178.443
	299	179.042
	300	179.641
	301	180.24
	302	180.838
	303	181.437
	304	182.036
	305	182.635
	306	183.234
	307	183.832
	308	184.431
	309	185.03
	310	185.629
	311	186.228
	312	186.826
	313	187.425
	314	188.024
	315	188.623
	316	189.222
	317	189.82
	318	190.419
	319	191.018
	320	191.617
	321	192.216
	322	192.814
	323	193.413
	324	194.012
	325	194.611
	326	195.21
	327	195.808
	328	196.407
	329	197.006
	330	197.605
	331	198.204
	332	198.802
	333	199.401
	334	200
	335	200.599
	336	201.198
	337	201.796
	338	202.395
	339	202.994
	340	203.593
	341	204.192
	342	204.79
	343	205.389
	344	205.988
	345	206.587
	346	207.186
	347	207.784
	348	208.383
	349	208.982
	350	209.581
	351	210.18
	352	210.778
	353	211.377
	354	211.976
	355	212.575
	356	213.174
	357	213.772
	358	214.371
	359	214.97
	360	215.569
	361	216.168
	362	216.766
	363	217.365
	364	217.964
	365	218.563
	366	219.162
	367	219.76
	368	220.359
	369	220.958
	370	221.557
	371	222.156
	372	222.754
	373	223.353
	374	223.952
	375	224.551
	376	225.15
	377	225.749
	378	226.347
	379	226.946
	380	227.545
	381	228.144
	382	228.743
	383	229.341
	384	229.94
	385	230.539
	386	231.138
	387	231.737
	388	232.335
	389	232.934
	390	233.533
	391	234.132
	392	234.731
	393	235.329
	394	235.928
	395	236.527
	396	237.126
	397	237.725
	398	238.323
	399	238.922
	400	239.521
	401	240.12
	402	240.719
	403	241.317
	404	241.916
	405	242.515
	406	243.114
	407	243.713
	408	244.311
	409	244.91
	410	245.509
	411	246.108
	412	246.707
	413	247.305
	414	247.904
	415	248.503
	416	249.102
	417	249.701
	418	250.299
	419	250.898
	420	251.497
	421	252.096
	422	252.695
	423	253.293
	424	253.892
	425	254.491
	426	255.09
	427	255.689
	428	256.287
	429	256.886
	430	257.485
	431	258.084
	432	258.683
	433	259.281
	434	259.88
	435	260.479
	436	261.078
	437	261.677
	438	262.275
	439	262.874
	440	263.473
	441	264.072
	442	264.671
	443	265.269
	444	265.868
	445	266.467
	446	267.066
	447	267.665
	448	268.263
	449	268.862
	450	269.461
	451	270.06
	452	270.659
	453	271.257
	454	271.856
	455	272.455
	456	273.054
	457	273.653
	458	274.251
	459	274.85
	460	275.449
	461	276.048
	462	276.647
	463	277.246
	464	277.844
	465	278.443
	466	279.042
	467	279.641
	468	280.24
	469	280.838
	470	281.437
	471	282.036
	472	282.635
	473	283.234
	474	283.832
	475	284.431
	476	285.03
	477	285.629
	478	286.228
	479	286.826
	480	287.425
	481	288.024
	482	288.623
	483	289.222
	484	289.82
	485	290.419
	486	291.018
	487	291.617
	488	292.216
	489	292.814
	490	293.413
	491	294.012
	492	294.611
	493	295.21
	494	295.808
	495	296.407
	496	297.006
	497	297.605
	498	298.204
	499	298.802
	500	299.401
	501	300
	502	300.599
	503	301.198
	504	301.796
	505	302.395
	506	302.994
	507	303.593
	508	304.192
	509	304.79
	510	305.389
	511	305.988
	512	306.587
	513	307.186
