# Supplementary material for: Conserved allosteric inhibition mechanism in SLC1 transporters
Source: eLife. 2023 Mar 1;12:e83464. doi: 10.7554/eLife.83464 (PMC10017108; doi:10.7554/eLife.83464)
Supplement: Figure 6—figure supplement 1—source data 1. [file elife-83464-fig6-figsupp1-data1.xlsx]

## Sheet: Sheet1
Figure S5 original data		F136Y/I237M-UCPH Voltage Dependence
Figure S5A	F136Y/I237M V-jump Ser only control													Figure S5B	F136Y/I237M V-jump Ser+ucph												Figure S5C	current-voltage relationship		Relative Current (n=16)
		Time (ms)	Trace #1	Trace #2	Trace #3	Trace #4	Trace #5	Trace #6	Trace #7	Trace #8	Trace #9				Time (ms)	Trace #1	Trace #2	Trace #3	Trace #4	Trace #5	Trace #6	Trace #7	Trace #8	Trace #9						exp1	exp2	exp3	exp4	exp5	exp6	exp7	exp8	exp9	exp10	exp11	exp12	exp13	exp14	exp15	exp16	ave	std
		0	-11	-10	-10.75	-12	-11.5	-11.5	-10.5	-12	-11				0	-6.75	-6	-7.25	-7.25	-6.25	-7	-6.25	-7	-7.25				500uM Ser only control	Voltage (mV)	-1	-1	-1	-1	-1	-1	-1	-1	-1	-1	-1	-1	-1	-1	-1	-1	-1	0
		0.04	-11.5	-10.25	-11.25	-11.75	-11.25	-10.75	-10.75	-11.75	-11				0.04	-7	-6	-7.25	-7	-6.25	-6.75	-6.5	-6.5	-6.75					-100	-0.928859	-0.760823	-0.83913	-0.872257	-0.970896	-0.856057	-0.833479	-0.829906	-0.858948	-0.945929	-0.840398	-0.857077	-0.903843	-0.850442	-0.94785	-0.983155	-0.879941	0.0607727
		0.08	-11.25	-11	-11	-11.25	-11.25	-10.5	-11.25	-12	-11.5				0.08	-6.5	-6.25	-6.5	-6.5	-6.75	-6.5	-6.25	-7	-6.75					-80	-0.782048	-0.626384	-0.699641	-0.755817	-0.916516	-0.732274	-0.681047	-0.69058	-0.704926	-0.794952	-0.678711	-0.733521	-0.783927	-0.740666	-0.88105	-0.904216	-0.756642	0.0841031
		0.12	-10.5	-10.75	-11	-10.75	-11	-11.25	-11	-11.5	-11.5				0.12	-6.25	-6.75	-6.75	-6.5	-6.75	-6.5	-6	-7	-7					-60	-0.648532	-0.506578	-0.571615	-0.624458	-0.824027	-0.615847	-0.556151	-0.560035	-0.589416	-0.693296	-0.561976	-0.611795	-0.673304	-0.625178	-0.772742	-0.81499	-0.640621	0.0939906
		0.16	-10.25	-11.25	-11	-10.75	-11	-11.5	-11.25	-11.25	-11				0.16	-6.5	-6.75	-6.5	-6.5	-7.25	-6.75	-7	-6.75	-6.75					-40	-0.531456	-0.417017	-0.468048	-0.528429	-0.67998	-0.481006	-0.434892	-0.443455	-0.472076	-0.596896	-0.458981	-0.503121	-0.552671	-0.528318	-0.677378	-0.684057	-0.528611	0.0885339
		0.2	-10.75	-11.5	-11	-11.25	-11.25	-11.25	-11	-10.75	-11.25				0.2	-6.75	-6.25	-6.75	-7	-6.5	-6.5	-6.5	-6.5	-7					-20	-0.418321	-0.331158	-0.371963	-0.42892	-0.586386	-0.392881	-0.339406	-0.350124	-0.375936	-0.49257	-0.369586	-0.398676	-0.46345	-0.43861	-0.589808	-0.575746	-0.432721	0.086803
		0.24	-11	-11.25	-11	-11	-11.5	-11.5	-11.5	-11.25	-11.25				0.24	-6.5	-6.5	-7.25	-6.75	-6.25	-6.5	-6.5	-6.25	-7					0	-0.36743	-0.270968	-0.288956	-0.347444	-0.473394	-0.311391	-0.258812	-0.274343	-0.292182	-0.395904	-0.295072	-0.315682	-0.367846	-0.357563	-0.477104	-0.464599	-0.347418	0.0731396
		0.28	-11.25	-10.75	-11.25	-11.25	-10.75	-11	-11.75	-11.75	-11.5				0.28	-6	-6.25	-7	-6.75	-5.75	-6.25	-6.75	-6.5	-7					20	-0.244132	-0.222311	-0.220508	-0.273416	-0.345347	-0.242155	-0.199478	-0.214225	-0.227971	-0.315192	-0.235683	-0.246414	-0.29537	-0.283946	-0.3887	-0.376945	-0.270737	0.058788
		0.32	-11	-10.75	-11	-11	-11	-11	-11.5	-11.75	-11.25				0.32	-5.75	-6.75	-6.25	-6.5	-6.25	-6.5	-6.5	-6.75	-7.25					40	-0.146708	-0.185998	-0.167684	-0.221829	-0.239703	-0.210063	-0.155226	-0.17085	-0.172583	-0.245027	-0.198132	-0.186494	-0.247743	-0.222091	-0.328614	-0.284403	-0.211447	0.0492547
		0.36	-10.25	-11.25	-10.75	-11	-11	-11	-11.5	-12	-11				0.36	-5.5	-7	-5.75	-6.5	-6.75	-6.5	-6.5	-6.75	-7.25					60
		0.4	-10	-11.25	-11	-11	-11.5	-11	-11.25	-11.5	-11.5				0.4	-5.75	-6.75	-6.25	-6.75	-7.5	-6.25	-6.5	-6.75	-6.75
		0.44	-10.25	-11	-11.25	-11.25	-12.25	-11	-11.25	-11.75	-11.5				0.44	-6.25	-6.75	-6.5	-6.75	-7.75	-6.5	-6.5	-7	-6.75				500uM Ser+200uM UCPH	-100	0.0867795	0.22767	0.0715041	0.426418	0.985276	0.16137	0.381335										0.334336	0.317824
		0.48	-9.75	-10.75	-10.75	-11	-11.5	-11	-11.5	-11.75	-11.75				0.48	-6	-7	-6.25	-6.75	-6.75	-7	-6.5	-7.25	-6.75					-80	-0.0146243	0.0825399	-0.0383065	0.213702	0.55172	-0.0155553	0.235814										0.145042	0.211009
		0.52	-10.5	-10.5	-10.25	-10.75	-11.5	-11.25	-11.5	-11	-11.75				0.52	-6.5	-6.5	-6	-6.5	-6.25	-7.5	-6.5	-6.75	-6.75					-60	-0.0951882	0.000825127	-0.0907479	0.0921109	0.286437	-0.0793638	0.0549338										0.0241439	0.137273
		0.56	-10.5	-11.25	-10.5	-10.5	-11.5	-11	-11	-10.75	-12				0.56	-7	-6.75	-5.75	-6.25	-6.5	-7.25	-6.25	-6.5	-7.25					-40	-0.121777	-0.0416744	-0.107995	0.0114757	0.127865	-0.097927	-0.0328756										-0.0375583	0.0870885
		0.6	-10.75	-11.5	-10.75	-10.5	-11.75	-11	-11	-10.25	-11.75				0.6	-7	-6.5	-6.25	-6.5	-7	-6.75	-6.25	-5.5	-6.75					-20	-0.131022	-0.0689795	-0.118108	-0.051007	0.0431074	-0.0926573	-0.0798267										-0.0712132	0.057435
		0.64	-11.25	-11.5	-11	-11.25	-12	-11	-11.25	-10.75	-11.5				0.64	-7.25	-6.75	-6.25	-6.75	-7	-6.75	-6.75	-5.75	-6.75					0	-0.129588	-0.0832781	-0.114662	-0.072991	-0.0462393	-0.11253	-0.0837528										-0.0918631	0.0287149
		0.68	-11.25	-11.75	-11.5	-11.5	-11.75	-11.25	-11	-10.75	-11.25				0.68	-7	-7.5	-6.75	-7	-6.75	-7	-6.5	-6.25	-6.75					20	-0.121039	-0.0914426	-0.101147	-0.0903241	-0.0994022	-0.0917684	-0.0733184										-0.0954916	0.0144253
		0.72	-11	-11.75	-11.5	-12	-11.5	-11.25	-11.25	-10.75	-11				0.72	-7.5	-7.25	-6.75	-7	-6.75	-6.5	-6.25	-7	-6.25					40	-0.10116	-0.0767586	-0.0826367	-0.0918917	-0.149443	-0.0703798	-0.0837773										-0.0937209	0.0265138
		0.76	-11	-11.75	-11.25	-11.5	-11.5	-10.75	-11.5	-10.75	-11.5				0.76	-7.25	-7	-6.75	-6.5	-6.75	-6.25	-6.25	-7.25	-6.25					60	-0.0905469	-0.0732192	-0.0612532	-0.0897567	-0.0784049	-0.0573086	-0.0584934										-0.0727118	0.0142127
		0.8	-11.25	-11	-10.25	-11.5	-11.75	-11	-11.25	-11.25	-11.75				0.8	-6.75	-6.5	-6.25	-6.75	-7	-6.25	-5.75	-6.75	-6.75
		0.84	-10.75	-10.75	-10	-10.75	-11.25	-11.5	-10.75	-11.25	-11.25				0.84	-6	-6.25	-6.25	-6.25	-7	-6.5	-6	-6.25	-6.5
		0.88	-10.5	-10.75	-10.5	-10.75	-10.75	-11.25	-10.5	-11	-11				0.88	-6	-6.5	-6.5	-6.25	-6.5	-6.5	-6.5	-6.5	-6
		0.92	-10.5	-10.5	-11	-11.25	-10.75	-11.25	-10.5	-11	-11.5				0.92	-6.25	-6.25	-6.75	-6.75	-6.25	-6.25	-6.5	-6.5	-5.5
		0.96	-10.75	-11	-11.75	-11	-11.25	-11	-10.75	-11.25	-11.25				0.96	-6.5	-6.25	-6.75	-6.75	-6.5	-6.5	-6.5	-6.25	-6.25
		1	-11.25	-11	-11.5	-11.5	-11.5	-11.5	-11.5	-11.5	-11.25				1	-6.75	-6.25	-6.75	-6.75	-7	-6.75	-6.5	-6.25	-6.5
		1.04	-10.75	-10.5	-11	-11	-11.25	-11.75	-11.75	-11.75	-11.5				1.04	-6.25	-6	-6.75	-6.25	-6.75	-6.75	-6.5	-6.5	-6.75
		1.08	-10.5	-11	-11.25	-10.75	-11	-11	-11.75	-11.75	-11.5				1.08	-6	-6.5	-7.5	-6	-6.5	-6.5	-7	-6.75	-6.75
		1.12	-11	-11.25	-11.5	-10.75	-10.5	-11	-11.5	-11.5	-11				1.12	-6.25	-7	-7.5	-6.5	-6.5	-6.5	-7	-7	-6.5
		1.16	-10.75	-11.25	-11	-10.5	-11.25	-11.5	-11.25	-11.25	-11				1.16	-6.25	-7	-6.75	-7	-7.25	-6.75	-7	-6.75	-6.75
		1.2	-10.75	-11.25	-11	-11	-11.5	-11	-11.25	-11.25	-11.25				1.2	-6	-6.75	-6.25	-7.5	-7	-6	-7	-6.75	-6.75
		1.24	-10.5	-11.25	-11.25	-11.5	-11.75	-11	-11.5	-11.5	-12				1.24	-6	-6.5	-6.25	-7.75	-6.5	-6	-7	-7	-6.75
		1.28	-11	-11.25	-11.25	-11.5	-11.5	-11	-11.5	-11.75	-12.5				1.28	-6.5	-6.5	-6.25	-7	-6.5	-6.25	-6.75	-7.5	-7.25
		1.32	-11.25	-11.5	-11.25	-11	-11.25	-11	-11.25	-11.5	-12.25				1.32	-6.75	-6.25	-6.5	-6.25	-6.75	-6.5	-6.25	-7.25	-7.25
		1.36	-11.25	-11.75	-11.25	-10.75	-10.75	-11.5	-11.25	-10.75	-11.25				1.36	-7.25	-6.75	-6.5	-5.5	-6.75	-7.25	-6.25	-6.75	-6.75
		1.4	-11	-11.5	-10.75	-11.25	-11	-11	-11.5	-10.75	-10.75				1.4	-7.25	-6.75	-6	-6.5	-7	-7	-6.75	-6.75	-6.5
		1.44	-10.75	-11.75	-11	-11.5	-11	-11	-11	-11	-10.25				1.44	-7.25	-6.75	-6.25	-7	-7	-6.75	-7.25	-7	-6.25
		1.48	-11.25	-11.5	-11	-11	-10.75	-11.5	-11.75	-11.5	-10.25				1.48	-6.75	-6.75	-6	-6.75	-6.5	-7	-7.75	-6.75	-6
		1.52	-11	-11.25	-11.5	-11	-11	-11.5	-11.75	-11.5	-10.75				1.52	-6	-7	-6.75	-6.5	-7	-6.75	-7.25	-6.5	-6.25
		1.56	-10.75	-11.25	-11.5	-11.25	-10.75	-11.5	-12	-11.5	-11.5				1.56	-6.25	-6.75	-7	-6.5	-6.25	-6.75	-7.25	-6.75	-6.5
		1.6	-10.5	-11.25	-11.25	-11	-10.75	-11.5	-11.75	-11.5	-11.75				1.6	-6.5	-7	-6.75	-6.5	-6.25	-7	-6.75	-7	-6.75
		1.64	-10.5	-11.5	-11	-10.75	-11.25	-11.25	-11.75	-11	-11.5				1.64	-6.5	-7	-7	-6	-6.5	-6.5	-6.25	-6.75	-6.75
		1.68	-10.5	-11.5	-11.5	-10.75	-11.25	-11.25	-11.75	-10.75	-11.75				1.68	-6.5	-7.25	-7	-6.25	-6.75	-6.25	-6.5	-6.5	-7.25
		1.72	-10.5	-11.25	-11.75	-11	-11.5	-11.25	-11	-11	-11.75				1.72	-6.25	-7.25	-6.75	-6.75	-7	-6	-6.5	-6.5	-7.25
		1.76	-10.75	-10.75	-11.75	-11.25	-11.5	-11.25	-10.5	-11	-11.75				1.76	-6.75	-7	-6.75	-7.25	-6.5	-6.75	-6.5	-6.25	-7
		1.8	-10.75	-10.75	-11.5	-11	-10.75	-11.25	-11	-11.25	-11				1.8	-6.75	-6.25	-7	-6.75	-5.75	-7	-6.5	-6.5	-6.75
		1.84	-10.75	-10.25	-11.5	-11.75	-11	-11.75	-11.5	-11.25	-10.75				1.84	-6.5	-5.5	-7.25	-7	-6.25	-7.25	-6.25	-7	-6.25
		1.88	-10.5	-10.75	-11.75	-11.5	-11	-11.5	-11.75	-10.5	-11.25				1.88	-6.25	-6.25	-7.5	-7	-6.75	-7.5	-6.75	-6.25	-6.25
		1.92	-10.75	-11	-11.75	-11.25	-11.25	-11	-12	-10.5	-11				1.92	-6	-6.25	-7.5	-7.25	-6.75	-7	-6.75	-6.5	-6.75
		1.96	-10.75	-11.25	-11.75	-10.75	-11.5	-10.25	-11.75	-11	-11				1.96	-5.5	-6.25	-7.25	-7	-7	-6.5	-6.75	-6.75	-6.5
		2	-10.5	-11.25	-11	-10.5	-11.25	-10.5	-11.75	-11.5	-11.5				2	-5.75	-6.75	-6.5	-6.75	-6.75	-6.5	-6.75	-6.5	-6.5
		2.04	-10.75	-11	-11	-10.75	-10.75	-11.25	-11.5	-11.75	-11.75				2.04	-6.5	-6.5	-6.5	-6.25	-7	-6.75	-7	-6.75	-6.25
		2.08	-10.75	-10.5	-11.5	-11	-10.5	-11.25	-11.25	-11.5	-11.5				2.08	-7.25	-6.25	-7	-6	-7.25	-6.75	-6.75	-6.75	-6.25
		2.12	-10.75	-10.75	-11.5	-11.25	-10.75	-10.75	-11	-11.25	-11.5				2.12	-7	-6.75	-6.75	-6	-7	-6.75	-6.5	-6.5	-6.75
		2.16	-11.25	-10.5	-11.5	-11.25	-11.25	-11.25	-11.25	-11.25	-11.5				2.16	-6.75	-6.25	-6.25	-6.5	-7	-6.75	-7	-6.25	-7.25
		2.2	-11	-11	-11	-11.5	-12	-11.75	-11.25	-11.25	-11.25				2.2	-6.25	-6.5	-6.25	-7	-7.25	-7.25	-7.25	-6	-7
		2.24	-10.5	-11.5	-11	-11	-12	-11.75	-11.25	-11.25	-11.75				2.24	-5.75	-6.5	-6.5	-7.25	-7	-7	-7	-6.25	-7
		2.28	-10.25	-11.75	-10.5	-11	-12.5	-11.75	-11	-11.5	-11.5				2.28	-6	-6.75	-6	-7	-7.25	-6.5	-6.5	-6.5	-6.5
		2.32	-10.75	-11.25	-10.5	-11.5	-12.25	-11.5	-11.25	-11.5	-11.25				2.32	-6.25	-6.75	-5.75	-7.25	-7.25	-6	-6.25	-6.25	-6.5
		2.36	-11	-10.75	-10.75	-11.75	-11.75	-11.25	-11	-11	-11.75				2.36	-6.75	-6.5	-6.25	-6.75	-7.25	-6	-6.25	-6.5	-7.25
		2.4	-11.25	-11	-11	-11.75	-11.25	-10.75	-11	-10.75	-11.5				2.4	-7	-6.5	-6.75	-6.75	-7	-6	-6.75	-6.25	-7
		2.44	-11.25	-11.75	-10.75	-11.25	-11.25	-11	-11.25	-11	-11.5				2.44	-7	-7.25	-6.25	-6.75	-7.25	-5.75	-6.5	-6.5	-6.75
		2.48	-10.75	-11.5	-11.25	-11.25	-11.25	-11.25	-11.25	-11.5	-12				2.48	-6.75	-7	-6.5	-7	-7.25	-6.25	-6.75	-6.5	-7
		2.52	-10.75	-10.75	-11.75	-11.25	-11.25	-11.75	-11.25	-11.75	-11.75				2.52	-6.75	-6	-6.75	-7.25	-7.25	-6.75	-6.5	-6.75	-6.75
		2.56	-10.75	-11	-11.5	-11.5	-11.75	-11.5	-11.25	-11.25	-11.25				2.56	-6	-6	-6.75	-7.25	-6.5	-6.5	-6.25	-6.75	-6.5
		2.6	-10.75	-10.75	-11.25	-11.25	-11.75	-11	-11.5	-11.25	-11.25				2.6	-6	-6.25	-6.75	-6.75	-5.75	-6.5	-6.25	-6.75	-6.5
		2.64	-10.5	-10.75	-11.5	-11.25	-11	-11	-11.75	-11.25	-10.75				2.64	-6.5	-6.5	-6.75	-6.5	-6.25	-6.25	-6.25	-7	-6.25
		2.68	-11	-10.75	-11.25	-11	-10.5	-11	-11	-11.75	-10.5				2.68	-6.75	-6.75	-6.5	-6.25	-6.25	-6.5	-6.25	-7.5	-5.5
		2.72	-11.25	-10.25	-10.75	-11.5	-10.75	-11.25	-11.25	-11.75	-11				2.72	-6.75	-6.75	-6	-7	-6.5	-6.75	-6.5	-7.5	-5.75
		2.76	-11	-10.75	-11	-11.25	-10.5	-10.5	-11.25	-11.25	-11.75				2.76	-6.5	-6.75	-6.5	-6.75	-6	-6.25	-6.75	-7	-7
		2.8	-10.5	-11	-11.75	-10.75	-11.5	-10.75	-11.75	-10.75	-11.75				2.8	-6	-6.75	-7	-6.5	-6.25	-6.75	-6.75	-7	-7.5
		2.84	-9.75	-11.75	-12	-10.75	-11.75	-11	-11.5	-10.75	-11.5				2.84	-5.75	-7	-7	-6	-7.25	-6.5	-6.5	-7	-6.75
		2.88	-10.25	-12.25	-11.75	-11.25	-11.75	-11.75	-11	-11	-11.5				2.88	-6.25	-6.75	-6.5	-6.75	-7.75	-6.5	-6.25	-6.25	-6.5
		2.92	-10.5	-11.5	-11.75	-11.25	-11.5	-11.75	-11.25	-11.5	-11.75				2.92	-6.25	-6	-6.75	-6.75	-6.75	-6.75	-6.5	-6.25	-6.5
		2.96	-10.75	-11.25	-11.25	-11.25	-11	-11.5	-11.25	-11.5	-11.75				2.96	-6.5	-6.5	-6.5	-6.5	-6.5	-6.5	-6.75	-6.5	-6.75
		3	-10.5	-11.25	-11	-11	-10.75	-11.5	-11.5	-11.75	-12				3	-6.25	-6.75	-6.5	-6.75	-6.75	-6.5	-7.5	-7	-7.25
		3.04	-10.75	-11.25	-10.75	-11	-11.25	-11.5	-12	-11.5	-11.75				3.04	-6.5	-6.5	-6.5	-6.5	-6.75	-7	-7.75	-7.5	-7.75
		3.08	-11	-11	-10.5	-11	-11.25	-11	-12	-11.75	-11.75				3.08	-6.5	-6.25	-6.25	-6.5	-6.5	-6.75	-7.5	-7.25	-7.25
		3.12	-11	-11	-10.75	-11.25	-11.5	-11.25	-12	-12	-11.75				3.12	-6.25	-6.25	-6	-6.25	-7	-6.75	-7.5	-6.75	-7
		3.16	-11	-11.25	-11.25	-11.5	-11.25	-11.25	-12.25	-11.75	-11.25				3.16	-6.25	-6.75	-6.5	-6.5	-7.25	-6.75	-7.25	-6.5	-6.75
		3.2	-11	-11.25	-11.5	-11.75	-11.5	-11.25	-12.5	-11.5	-10.75				3.2	-6.5	-7	-6.5	-6.75	-7	-6.5	-7	-6.75	-6.5
		3.24	-11	-11.25	-11.75	-11.5	-11.75	-11.25	-12.25	-11.25	-11.25				3.24	-7.25	-7	-6.75	-7	-7	-6.25	-6.75	-6.25	-7
		3.28	-10.5	-11.25	-11.75	-11.25	-11.5	-11.5	-11.5	-10.75	-11.75				3.28	-7	-7	-6.5	-6.75	-6.75	-6.5	-6.5	-6	-7.25
		3.32	-10.25	-11.25	-11	-11.75	-11.25	-11	-10.75	-11.25	-11.5				3.32	-6.5	-7	-6.25	-7.25	-6.25	-6.25	-6.5	-6	-6.75
		3.36	-10.25	-11.5	-11.25	-11.75	-10.75	-10.75	-10.5	-11.5	-11.25				3.36	-6.25	-7.25	-6.75	-7.25	-6.25	-6	-6.5	-6.5	-6.75
		3.4	-10.75	-11.75	-11.25	-11.5	-10.75	-11	-10.75	-11.25	-11				3.4	-6.5	-7.25	-7.25	-7.25	-6.25	-6.25	-6	-7	-6.5
		3.44	-11	-11.75	-11.75	-11.25	-11	-11.25	-11.25	-11	-11				3.44	-6.25	-7	-7.25	-7	-6	-6.5	-6.25	-7	-6.25
		3.48	-10.75	-11.5	-11.5	-10.75	-10.5	-11.75	-11	-11.25	-11.5				3.48	-6.5	-6.75	-7	-6	-6	-6.75	-6.5	-7.5	-6.5
		3.52	-10.75	-11.5	-11	-10.75	-11	-11.5	-11	-11.25	-11.75				3.52	-6.75	-6.5	-6.75	-6	-6.5	-6.5	-6.75	-7.5	-6.5
		3.56	-10.25	-11	-11	-11.25	-11.25	-11.75	-11.25	-11.25	-11.75				3.56	-6.5	-6	-6.75	-6.5	-6.75	-6.5	-6.5	-7	-6.25
		3.6	-10	-11	-10.5	-11	-11.25	-11.75	-11.25	-11.5	-11.5				3.6	-6.5	-6.25	-6.5	-6.5	-6.25	-6.75	-6.25	-6.5	-6.5
		3.64	-10.5	-10.75	-10.25	-11	-11	-11.5	-11.75	-11.75	-11.25				3.64	-6	-5.75	-6.25	-7	-6	-7.25	-6	-6.75	-6.5
		3.68	-10.5	-10.5	-10.25	-11.75	-10.75	-11.25	-12.25	-11.25	-11.5				3.68	-6	-5.5	-6	-7.25	-6	-6.75	-6.5	-6	-6.5
		3.72	-10.5	-10.25	-10.5	-12	-11.5	-10.75	-12.25	-11	-11.25				3.72	-6	-5.75	-5.75	-7.25	-6.25	-6.25	-7	-5.75	-6.5
		3.76	-10.25	-10.5	-10.75	-11.75	-11.75	-11	-11.75	-10.75	-11				3.76	-6.25	-6.5	-5.75	-7.5	-6.25	-6.5	-7.25	-5.75	-6.5
		3.8	-11.25	-11.25	-10.75	-11.5	-11.25	-11.5	-11.5	-10.25	-11				3.8	-6.25	-6.75	-6.25	-7	-6	-6.75	-7.5	-5.5	-6.5
		3.84	-11	-11.5	-10.5	-11.25	-10.5	-11.75	-11	-10.5	-10.75				3.84	-6.25	-6.75	-6.25	-6.5	-6	-7.25	-7	-5.75	-6.5
		3.88	-10.75	-11	-10.5	-11	-10.5	-11.75	-10.75	-10.75	-10.5				3.88	-6.5	-6.25	-6.25	-6.25	-6.5	-7.25	-6.5	-6.25	-6.25
		3.92	-11	-10.75	-11	-11.5	-10.75	-11.75	-11	-11	-10.75				3.92	-6.25	-5.75	-6.25	-6.5	-6.5	-6.75	-6.5	-6.75	-6.5
		3.96	-11	-10.75	-11.75	-11.25	-11	-11.5	-11	-11	-11				3.96	-6.25	-6	-6.5	-6.5	-6.5	-6.5	-6.25	-6.5	-6.75
		4	-11	-10.75	-11.5	-11	-11.5	-11	-11.5	-10.5	-11				4	-6.5	-6.5	-6.5	-6.75	-7	-6.5	-6.5	-6.25	-6.75
		4.04	-11.5	-11	-11.25	-11	-12	-11	-11.25	-11	-11.5				4.04	-7	-7.25	-7	-6.5	-7	-6.25	-6.5	-6.25	-6.75
		4.08	-10.75	-10.75	-11	-11.25	-11.5	-11	-11.5	-11	-11.25				4.08	-6.5	-6.75	-7.25	-6.25	-7	-6.25	-6.75	-6.5	-6
		4.12	-10	-10.75	-11.25	-11.5	-11.25	-11	-11.25	-11.75	-11.25				4.12	-5.5	-6.5	-7.5	-6.5	-6.75	-6.25	-6.75	-7	-5.25
		4.16	-10.25	-11.25	-11.5	-11.25	-11	-10.75	-11.25	-11.25	-11.75				4.16	-5.75	-7	-7.5	-6.75	-6.25	-6.25	-6.5	-6.5	-5.75
		4.2	-10.5	-11.25	-11.5	-11.25	-11.25	-11	-11.25	-11	-11.75				4.2	-6.5	-7	-6.75	-6.75	-6	-6.5	-6	-6.25	-6.75
		4.24	-10.5	-11	-11	-11	-11.5	-11.5	-11	-11.5	-11.75				4.24	-6.5	-6.5	-6.25	-6.25	-6.75	-7	-6	-6.5	-7.5
		4.28	-10.5	-11.25	-10.5	-11.25	-11.25	-11.5	-11.25	-11.25	-11.25				4.28	-6.5	-6.75	-5.75	-6.25	-7	-7	-6.5	-6.75	-7.25
		4.32	-10.5	-11	-10	-11.25	-11.25	-11.5	-11.5	-10.5	-11				4.32	-6.25	-6.5	-5.75	-6	-6.75	-6.75	-7	-6.75	-7.25
		4.36	-11	-11.25	-10.5	-11.25	-11.25	-11.5	-11.75	-10.25	-11.25				4.36	-6.25	-7	-6.25	-6.5	-6.5	-6.5	-7	-6.25	-7
		4.4	-11.25	-11	-11	-11	-11.25	-11	-11.5	-10.5	-11.25				4.4	-6	-6.75	-6.25	-6.25	-6.5	-6.5	-7	-5.5	-6.75
		4.44	-11.25	-11.25	-11	-11.25	-11	-10.5	-11.25	-11	-11.25				4.44	-6	-6.75	-6.25	-6.5	-6.5	-6.25	-6.75	-6	-6.5
		4.48	-10.5	-11.5	-10.5	-11.5	-11.5	-11.25	-11.5	-11.25	-11.5				4.48	-5.75	-6.5	-6	-7	-7	-6.5	-6.5	-6.25	-6
		4.52	-10.5	-11.75	-10.75	-11.75	-11.75	-11.75	-11	-11.75	-11.75				4.52	-6.5	-6.5	-6.5	-7.25	-7.25	-6.75	-6.25	-6.5	-6.75
		4.56	-10.75	-11.25	-11.5	-11.5	-11.25	-11.5	-11.25	-11.25	-11.75				4.56	-6.5	-6.25	-7	-6.75	-7	-6.25	-6.25	-6.75	-6.75
		4.6	-11.5	-10.75	-11.5	-11.25	-11.25	-11.25	-11.25	-11	-12				4.6	-6.75	-6	-6.75	-6.25	-6.25	-6	-6.5	-6.75	-7.5
		4.64	-11.25	-10.25	-11.25	-11	-11.25	-11.25	-11.25	-11.25	-12				4.64	-6.5	-6	-6.75	-6.25	-6.25	-6.25	-6.5	-6.75	-7.25
		4.68	-11.25	-10.5	-11.5	-10.75	-11.25	-11	-11.75	-11.5	-11.5				4.68	-6.5	-6.5	-7	-6.5	-6.75	-6.5	-6.5	-7	-6.5
		4.72	-11	-11	-11.75	-11	-11	-11	-11.5	-11.5	-11.75				4.72	-6.75	-6.5	-7	-6.75	-6.75	-6.75	-6.75	-7	-6.25
		4.76	-10.75	-11	-11.5	-11.25	-10.5	-11	-11.25	-10.75	-11.75				4.76	-7	-6.5	-7	-7	-6.25	-6.75	-6.5	-7	-6.25
		4.8	-10.75	-10.5	-11.75	-11	-10.5	-11	-11.25	-11	-11				4.8	-6.5	-6.25	-7.25	-7	-6.25	-6.75	-6.75	-6.75	-6.25
		4.84	-10.5	-10.5	-11.5	-11	-11	-11.25	-11.25	-11.5	-11				4.84	-6.5	-6	-6.75	-6.75	-6.25	-7	-6.75	-6.75	-6.5
		4.88	-10.75	-10.75	-10.75	-11.25	-11.75	-11	-11.5	-11.75	-11.25				4.88	-7	-6	-5.75	-6.75	-6.75	-6.5	-7	-7	-6.5
		4.92	-11.25	-11	-10.5	-10.75	-11.75	-11.25	-11.75	-11.25	-11.25				4.92	-7	-6.25	-5.5	-6.5	-7.25	-6	-7	-6.5	-6.5
		4.96	-11.5	-10.5	-11	-10.75	-11.25	-11.25	-11.75	-11.25	-11.25				4.96	-7	-6	-6.5	-6.25	-7	-6.25	-6.75	-6.5	-6.25
		5	-11	-10.75	-11	-11.25	-11	-11.25	-11.5	-11.25	-11.5				5	-6.75	-6.5	-7	-6.75	-6.5	-6.75	-6.5	-6.75	-6.5
		5.04	-11	-11.25	-11.25	-11.25	-11.25	-11	-11.75	-11	-11.5				5.04	-7	-7	-7	-6.75	-6.75	-7.25	-6.75	-6.25	-7
		5.08	-11	-11.5	-10.75	-11.25	-11.25	-11	-11.5	-11	-11.25				5.08	-7	-7	-6.5	-6.5	-6.75	-7	-6.5	-6.25	-6.75
		5.12	-11.25	-11.5	-10.75	-11.5	-11.75	-11	-11.25	-11	-11				5.12	-6.5	-7	-6.25	-6.75	-7.25	-6.5	-6.75	-6	-6.5
		5.16	-10.75	-11.25	-10.5	-11.75	-12	-10.25	-11.25	-11.75	-10.75				5.16	-6	-6.5	-6	-6.5	-7.25	-6	-6.75	-6.5	-6.25
		5.2	-10.25	-11.5	-11.25	-11.25	-12	-10.5	-10.5	-11.5	-11.25				5.2	-6	-6.5	-6.25	-6.25	-7.5	-6.25	-6.25	-7	-6.75
		5.24	-10.5	-11	-11.25	-11.25	-11.25	-11.5	-10.25	-11.25	-11.75				5.24	-6.25	-6.75	-6.5	-6.75	-7	-7	-6	-6.75	-7
		5.28	-11	-11	-11.5	-11.5	-11	-11	-10.25	-11	-11.75				5.28	-6.5	-6.5	-6.75	-7	-6.5	-6.5	-6	-6.5	-7
		5.32	-11	-10.75	-11.5	-10.5	-11	-10.75	-10.75	-10.75	-11.5				5.32	-6.25	-5.75	-6.5	-6.5	-6.75	-6.25	-6.25	-6.25	-6.75
		5.36	-10.5	-10.25	-11.5	-10.75	-11	-11	-10.75	-10.5	-11.75				5.36	-6.5	-6	-6.5	-6.5	-6.75	-6.25	-6.5	-6.75	-7
		5.4	-10.25	-10.75	-11.25	-11	-10.75	-10.75	-11.25	-11	-11.75				5.4	-6.25	-6.75	-6.5	-6.25	-6.25	-6.25	-6.75	-6.75	-7.25
		5.44	-10.25	-10.75	-10.5	-11.5	-11	-10.75	-11.75	-11.25	-11.25				5.44	-6.25	-6.5	-6	-7	-5.75	-6.5	-7	-6.5	-7.25
		5.48	-10.5	-10.75	-10.5	-11.25	-11.5	-10.5	-11.5	-11	-11.25				5.48	-6	-6.25	-6.25	-6.75	-6.25	-6.5	-7	-6.25	-7
		5.52	-10.5	-10.75	-11.25	-11	-11	-10.75	-11.25	-11.25	-11.75				5.52	-6	-6.5	-6.75	-6.75	-6.75	-6.25	-6.75	-6.25	-6.75
		5.56	-10.25	-11	-11.5	-11	-10.75	-10.5	-11.5	-11.25	-11.5				5.56	-6.25	-7.25	-7	-7	-6.75	-6.5	-7.25	-6.5	-6.5
		5.6	-10.75	-11.25	-11	-11	-11	-11	-11.5	-11.5	-11				5.6	-6.75	-7.25	-6.5	-6.25	-6.5	-6.5	-6.75	-6.75	-6.25
		5.64	-11.5	-11	-11.25	-11.5	-11	-11.25	-11.25	-11.5	-10.5				5.64	-7.25	-6.5	-6.75	-6.25	-7	-6.25	-6.5	-7	-5.75
		5.68	-12	-10.5	-11	-11	-10.5	-11.25	-11.25	-11.75	-10.75				5.68	-7	-6.25	-6.5	-6.25	-6.5	-6.75	-6.5	-7	-6.25
		5.72	-11.25	-10.25	-11.25	-10.5	-10.25	-11.5	-11.25	-11.5	-11				5.72	-6.5	-6.25	-6.75	-6.25	-6.25	-6.75	-6.75	-7	-6.75
		5.76	-10.5	-10.25	-11.25	-11.25	-10.25	-11.25	-11	-11.25	-11.5				5.76	-6.5	-6.5	-6.75	-7	-6.5	-6.5	-6.5	-6.5	-7
		5.8	-10.75	-11.25	-11	-11.25	-10.75	-11.25	-10.75	-11	-11.75				5.8	-6.5	-6.75	-6.75	-7	-6.5	-6.5	-6.25	-6.25	-7.25
		5.84	-11	-11	-10.75	-10.25	-11.25	-10.75	-11	-10.75	-11.25				5.84	-7	-6.25	-6.25	-6	-7	-6.5	-6.25	-6.5	-7
		5.88	-11	-11.25	-10.75	-10.25	-11.25	-11	-11.25	-11.5	-10.75				5.88	-6	-6.5	-6.25	-6.5	-7	-6.5	-6.25	-7	-7.25
		5.92	-10	-10.75	-11	-11	-11	-10.75	-11.25	-12.25	-11.25				5.92	-5.5	-6.5	-6.5	-7	-6.75	-6	-6.5	-7	-7.25
		5.96	-10.5	-10.5	-11.5	-11.25	-11.25	-10.5	-11.25	-11.75	-11.5				5.96	-6	-6.5	-7	-7	-6.75	-6	-7	-6.75	-7.25
		6	-10.5	-11	-11.25	-11.25	-11.25	-11	-11.25	-11.25	-11.5				6	-6.75	-6.75	-6.5	-7	-6.5	-6.25	-7	-6.5	-6.75
		6.04	-10.25	-11.25	-11	-10.75	-11.5	-11.5	-11.25	-11	-11				6.04	-6.75	-6.5	-6.5	-6.25	-6.5	-6.75	-7	-6.5	-6.25
		6.08	-10	-11.25	-11	-10.75	-11.5	-10.5	-11	-11.25	-11.25				6.08	-6.5	-6.5	-6.5	-6	-6.25	-6.25	-7	-7	-6.5
		6.12	-10.5	-11.25	-11.5	-11.25	-11.5	-10.75	-11.25	-11.25	-11.75				6.12	-6.25	-7	-7.25	-6.25	-6.75	-6	-7	-7	-7.25
		6.16	-10.25	-10.75	-11.5	-11.25	-11.25	-10.5	-11.5	-10.75	-12				6.16	-6	-6.75	-7	-6	-6.5	-6.75	-6.75	-6.5	-7
		6.2	-10.25	-11	-10.5	-11	-11.75	-11.25	-11.75	-11	-11.25				6.2	-6.25	-6.5	-6.5	-6.25	-7	-7.25	-6.75	-6.25	-6.5
		6.24	-10.25	-11.25	-9.5	-10.75	-11.75	-11.25	-11.5	-11.5	-10.75				6.24	-6	-6.5	-5.75	-6.5	-7	-7	-6.5	-6	-6.5
		6.28	-10.75	-11.25	-10.25	-11	-11.5	-11	-10.75	-11.25	-10.75				6.28	-6.75	-6.75	-6.25	-7.25	-7	-6.75	-6.25	-6	-6.25
		6.32	-11	-11.5	-11	-11	-11	-11	-10.75	-11.5	-11.25				6.32	-7	-6.5	-6.5	-7.25	-6.75	-6.75	-6.5	-6.75	-6.25
		6.36	-11	-11.25	-11.25	-11	-11	-11	-11.25	-11.25	-11				6.36	-6.75	-6.5	-6.5	-6.75	-6.5	-6.25	-6.75	-7	-6.25
		6.4	-11.25	-10.25	-11	-10.75	-11.25	-11	-11.5	-11	-11.5				6.4	-6.5	-5.75	-6.75	-6.5	-7	-6	-7	-7	-6.75
		6.44	-11	-10.25	-10.75	-11	-11.5	-10.75	-11.5	-10.75	-11.75				6.44	-6.75	-5.5	-6.75	-6.25	-7	-5.75	-6.5	-6.5	-7
		6.48	-11.25	-10.75	-11	-10.5	-11.75	-10.5	-11.25	-10.5	-11.5				6.48	-6.75	-6	-6.75	-6.25	-7.5	-6.25	-6.75	-6.25	-7
		6.52	-11.5	-10.75	-11.5	-10.25	-11.75	-10.5	-10.75	-10.75	-11				6.52	-7.25	-6.5	-7.25	-6.25	-7.75	-6.25	-6.25	-6.5	-6.5
		6.56	-11.25	-10.75	-11.25	-10.5	-11.75	-10.75	-10.5	-11	-11.25				6.56	-7	-6.75	-7	-6.5	-7	-6.5	-6.5	-6.5	-6.5
		6.6	-10.75	-11.75	-10.5	-11	-11.25	-11.25	-10.75	-10.75	-11.25				6.6	-6.25	-7	-6.5	-6.75	-7	-6.5	-6.5	-6.5	-6.25
		6.64	-10.5	-11.75	-10.25	-11.5	-11	-11	-11	-11	-11				6.64	-6.25	-6.75	-6	-6.75	-6.75	-6.5	-6.5	-6.75	-6.5
		6.68	-10	-10.75	-11	-11.75	-11	-11.25	-11.5	-11.5	-10.75				6.68	-6.25	-6.5	-6.25	-7.25	-6.5	-7	-7	-7	-6.75
		6.72	-10	-10.25	-11.75	-11.5	-11.25	-11.5	-11.75	-11.25	-11				6.72	-6	-6.25	-7	-7.25	-6.5	-7	-8	-7	-7
		6.76	-10.25	-10.5	-12	-11.5	-11.25	-11.25	-11.5	-10.5	-11.5				6.76	-5.75	-6	-7.5	-7.25	-6.75	-6.5	-7.5	-6.75	-7.5
		6.8	-10.25	-11.25	-11.75	-11.25	-11.5	-10.75	-11.25	-11	-11.25				6.8	-5.75	-6.25	-7.5	-6.75	-6.75	-6.25	-6.75	-7	-7
		6.84	-11	-10.75	-10.75	-11.25	-11.5	-10.5	-11	-11.25	-11.25				6.84	-6.75	-6.25	-6.5	-6.5	-7	-6	-6.75	-7.5	-7
		6.88	-11.25	-10.5	-10.5	-11.25	-11.25	-10.75	-10.75	-11.25	-11.25				6.88	-7	-6	-6.75	-6.5	-6.75	-6	-6.75	-7.5	-7
		6.92	-10.75	-10.75	-11.25	-11.25	-11	-11.5	-10.75	-11.25	-11.5				6.92	-6.75	-6	-7.25	-6.5	-6.5	-6.5	-6.75	-7	-6.5
		6.96	-10	-11.25	-11.25	-11	-11.25	-11.5	-11	-11.5	-12				6.96	-6	-6.75	-6.75	-6.5	-6.75	-6.5	-6	-6.5	-6.5
		7	-10.25	-10.75	-10.75	-10.5	-10.5	-11	-11.5	-11	-11.5				7	-5.75	-6.75	-6.25	-6.25	-6.5	-6.25	-6.25	-6.25	-6.5
		7.04	-10.5	-10.5	-11	-10.5	-10.75	-11	-12	-11	-11.25				7.04	-6.25	-6.75	-6.75	-6.25	-6.5	-6.75	-7	-6.5	-7
		7.08	-11.25	-10.75	-11	-10.5	-11	-10.75	-11.75	-11	-11.25				7.08	-7	-6.5	-6.75	-6.5	-6.75	-6.75	-6.75	-6.75	-7
		7.12	-10.75	-10.75	-11	-10.5	-11.5	-10.5	-11.75	-11	-11.75				7.12	-6.75	-6.75	-6.5	-6.5	-6.75	-6.75	-6.75	-7.25	-7.25
		7.16	-10.5	-11	-10.75	-10.75	-11	-10.75	-12	-11	-11.25				7.16	-6.25	-6.75	-6.25	-6.75	-6.25	-6.75	-6.75	-6.75	-7
		7.2	-10.5	-11.25	-11	-11.25	-10.5	-11	-11.25	-11.25	-11.25				7.2	-6.25	-6.75	-6.5	-7	-5.75	-6.75	-6.75	-6.75	-7
		7.24	-10.75	-11.75	-11.25	-11.75	-10	-11.25	-11	-11.25	-11.25				7.24	-6.5	-7	-7.25	-7.25	-6.25	-6.75	-7	-6.5	-7
		7.28	-11	-11.25	-11.25	-11.75	-10.75	-11.75	-11.25	-11.25	-11.5				7.28	-6.25	-6.75	-6.75	-7	-7.25	-7.25	-6.75	-6.5	-7.25
		7.32	-11	-10.75	-11.5	-11.5	-11.25	-11.5	-11	-11.5	-11.5				7.32	-6.25	-6.25	-6.75	-6.75	-6.75	-6.75	-7	-7	-7.25
		7.36	-10.5	-10.75	-11.5	-11.25	-12	-11.25	-10.25	-11.75	-11.25				7.36	-6.25	-6.25	-6.5	-6.5	-6.75	-6.25	-6.5	-7.25	-7.25
		7.4	-10.75	-11	-11	-11	-11.25	-10.75	-10.25	-12	-11.25				7.4	-6.75	-6.25	-6.5	-6.5	-6.25	-6	-6.25	-7.25	-6.75
		7.44	-11	-11	-10.75	-10.25	-11	-10.75	-10.5	-11.75	-11.25				7.44	-7	-6.25	-6.75	-6.25	-6.75	-6.25	-6.25	-7.25	-6.75
		7.48	-11	-10.5	-10.75	-10.5	-11.25	-11	-10.75	-11.25	-11				7.48	-6.5	-6	-7.25	-6.5	-7	-6.5	-6	-7	-6.25
		7.52	-10.5	-10.75	-10.75	-10.75	-11.5	-10.5	-11	-10.75	-11				7.52	-6.25	-6.25	-7	-6.25	-6.75	-6.25	-6.25	-6.75	-6.5
		7.56	-10.25	-10.25	-11	-11	-11.75	-11.25	-11.25	-11.25	-11.5				7.56	-6	-6.25	-6.75	-6.25	-7	-6.75	-6.25	-6.5	-6.5
		7.6	-10.5	-10.5	-11	-10.75	-11.5	-11	-11.25	-11.75	-11.25				7.6	-5.75	-6.5	-6.5	-6.5	-7.25	-6.75	-6.5	-6.75	-6.75
		7.64	-10.5	-11.5	-11.5	-11	-11	-11	-11	-11.5	-11.25				7.64	-6.75	-7	-6.25	-6.5	-7.25	-6.75	-6.5	-6.75	-7.25
		7.68	-10	-11.5	-11.5	-11.25	-11.5	-10.5	-11	-11.25	-11.5				7.68	-6.25	-7	-6.25	-6.5	-7.25	-6.5	-6.5	-6.75	-7.25
		7.72	-10.5	-11.25	-11.5	-11.5	-11	-10.5	-10.75	-11	-11				7.72	-6	-7	-6.75	-6.25	-7	-6.25	-7	-6.25	-7
		7.76	-11	-11	-11.25	-11.25	-11	-10.75	-10.75	-11	-10.75				7.76	-6	-7	-7	-6.25	-6.75	-6.5	-7	-6.5	-6.5
		7.8	-11.25	-10.75	-10.75	-10.75	-11.5	-11	-11.25	-10.5	-11				7.8	-6	-6.75	-6.5	-6.25	-7.25	-6.75	-7.25	-6	-6
		7.84	-11	-11	-10.75	-10.75	-11.5	-11.5	-11.75	-10.75	-11.25				7.84	-7	-6.75	-6	-6.5	-7.25	-7.25	-7.25	-6	-6.25
		7.88	-10.75	-10.5	-11	-11	-11.5	-11.25	-11.5	-11.25	-12				7.88	-7	-6.5	-6.5	-7	-7	-7	-7.25	-6.5	-6.5
		7.92	-11	-10.5	-11	-11.5	-11.75	-10.75	-11.25	-11.5	-12.25				7.92	-7	-6.25	-6.75	-7.5	-7.25	-6.5	-6.75	-7	-6.75
		7.96	-10.75	-11	-10	-11.5	-11.25	-10.5	-11.5	-11.5	-11.25				7.96	-6.75	-6.5	-6	-7.5	-7.25	-6.25	-6.5	-6.75	-5.5
		8	-10.75	-10.75	-10.75	-11.75	-11	-10.75	-11	-11.25	-10.5				8	-6.25	-6.5	-6.25	-7.75	-7.5	-7	-6.75	-6.75	-6
		8.04	-10.25	-10.5	-11.25	-11.75	-11	-10.75	-11	-11	-10.5				8.04	-5.5	-6	-6.5	-7.25	-6.75	-6.5	-6.75	-6.75	-6.5
		8.08	-10.25	-10.5	-11.5	-11.25	-11	-10.75	-11.25	-10.75	-10.75				8.08	-6	-6	-6.25	-6.75	-6.5	-6.25	-7	-6.75	-6.75
		8.12	-10.25	-10.5	-11	-11	-10.75	-11.25	-11.5	-11	-10.75				8.12	-5.75	-6.25	-6.25	-6.75	-6.25	-6	-6.75	-6.75	-6.75
		8.16	-10.5	-10.75	-10.75	-11	-10.5	-11.25	-11	-11	-11				8.16	-5.75	-6.5	-6.75	-6.75	-6.25	-6	-6.5	-7	-7
		8.2	-11	-11	-11.25	-11	-10.25	-11.75	-10.5	-10.75	-11.25				8.2	-6.75	-6.75	-6.75	-7	-6.5	-7	-5.75	-6.75	-6.75
		8.24	-11	-11	-11	-10.75	-10.75	-12	-11.25	-10.75	-11.25				8.24	-7.25	-7	-6.75	-7	-6.75	-7.25	-6	-7.25	-6.5
		8.28	-10.5	-10.75	-10.25	-11.25	-11	-11.75	-11	-10.5	-11.5				8.28	-6.75	-6.5	-6.5	-6.75	-6.75	-7	-6.25	-6.75	-6.75
		8.32	-10.25	-10.5	-10.25	-11	-11	-11.25	-10.75	-10.25	-11.5				8.32	-6.25	-6.75	-6.5	-6.5	-6.5	-6.75	-6.5	-6.25	-7
		8.36	-10.5	-10.75	-10	-10.75	-11	-11.5	-11	-10.5	-11.25				8.36	-6	-6.75	-6.25	-6.5	-6.25	-7.25	-7.25	-6.5	-7.25
		8.4	-10.75	-11.5	-10.75	-10.75	-11.25	-11.25	-11	-10.75	-10.75				8.4	-6.25	-7.25	-6.25	-6.75	-6.5	-6.5	-7.25	-6.5	-7
		8.44	-10.5	-11.25	-11	-11.25	-11.5	-11.25	-11.75	-11.25	-10.5				8.44	-6.5	-6.5	-6.75	-6.75	-6.75	-6.25	-7.25	-6.75	-6.5
		8.48	-10.25	-11.5	-11.75	-11.25	-11.5	-11.25	-11.75	-11	-10.5				8.48	-6.5	-6.25	-7	-6.75	-7	-6.25	-6.75	-6.5	-6.25
		8.52	-10.5	-11.5	-11.25	-11	-11.25	-11	-11.5	-11.25	-11				8.52	-6.5	-6.25	-6.5	-6.75	-6.75	-6.25	-6.25	-6.25	-6.5
		8.56	-10.75	-11.25	-11.25	-11.25	-11.25	-10.75	-11	-11.25	-11.75				8.56	-6	-6.5	-6.5	-7	-7	-6.5	-6.5	-6.75	-6.75
		8.6	-10.75	-11.25	-11.25	-11	-10.75	-10.5	-11	-11.25	-12				8.6	-6	-7	-6.5	-7	-6.25	-6.75	-6.25	-6.75	-7
		8.64	-10.5	-11	-11	-11	-10.5	-10.5	-11	-10.5	-11.75				8.64	-6.5	-7	-6.5	-6.75	-6.25	-6.75	-7	-6.25	-6.75
		8.68	-10.5	-10.5	-10.75	-10.5	-11	-10.25	-10.5	-10.5	-11				8.68	-6.75	-6.25	-6.25	-5.75	-6.75	-6.5	-6.75	-6.25	-6.5
		8.72	-10.75	-10.75	-10.75	-11.25	-11.5	-10.75	-10.75	-10.75	-10.75				8.72	-7	-6.5	-6.5	-6.5	-7	-6.75	-6.25	-6.25	-6.25
		8.76	-10.25	-10.75	-10.5	-11.5	-11.25	-10.75	-11	-10.75	-10.75				8.76	-6.25	-6.25	-6.25	-7	-7	-6.25	-6.25	-6.25	-6
		8.8	-10.25	-11	-10.5	-11.25	-11	-11	-11	-11	-11.5				8.8	-6.25	-6.25	-6	-7	-6.75	-6.25	-6.75	-6.25	-6
		8.84	-10.25	-10.75	-10.5	-11	-11.25	-11.25	-11.25	-10.75	-12				8.84	-6.5	-5.75	-6.25	-6.5	-6.75	-6	-7.25	-6.25	-6.75
		8.88	-10.5	-10.75	-11	-11	-11.25	-11.75	-11.5	-10.5	-11.5				8.88	-6.75	-6	-6.25	-6.25	-6.5	-6.75	-7	-6.25	-7
		8.92	-11	-10.75	-11.25	-11	-11	-11.25	-11.25	-10.75	-11				8.92	-7	-6.25	-6	-6	-6	-6.25	-6.75	-6	-7
		8.96	-10.75	-10	-10.5	-10.25	-11.25	-11	-11.25	-11.75	-11				8.96	-6.5	-6	-6.5	-6	-7	-6.5	-6.75	-6.75	-6.75
		9	-11	-10.25	-10.5	-9.75	-11.5	-11	-11.5	-11.5	-11				9	-6.5	-6.25	-6.75	-6	-6.75	-6.75	-6.75	-7	-6.25
		9.04	-10.75	-10.5	-11	-10	-11	-11	-11.25	-11.25	-11				9.04	-6.25	-6	-6.75	-6.25	-6.5	-6.75	-6.5	-6.75	-5.75
		9.08	-10.75	-10.5	-11.25	-10.75	-10.75	-10.75	-11	-11.25	-11.25				9.08	-6.5	-6	-6.75	-6.75	-6.5	-6.75	-6.25	-6.75	-6
		9.12	-10.75	-10.75	-11.25	-11.25	-10.5	-10.75	-10.75	-11.25	-11.5				9.12	-6.25	-6.5	-6.5	-7	-6	-6.25	-6.5	-6.5	-6.75
		9.16	-11	-11	-10.75	-11	-10.75	-10.5	-10.5	-11	-11.5				9.16	-6	-6.75	-6	-6.25	-6	-5.75	-6.25	-6.5	-7
		9.2	-11.25	-11	-10.5	-11.5	-11	-11	-10.75	-10.5	-11.75				9.2	-6.25	-7	-6	-6.5	-6	-5.5	-6	-6.25	-7.25
		9.24	-11	-10.75	-10.75	-11.5	-10.75	-10.75	-11	-11	-11.25				9.24	-6.75	-6.75	-6.5	-6.25	-6.5	-6.25	-6	-6.75	-6.5
		9.28	-10.75	-10.25	-11.25	-11	-11.25	-10.75	-11	-11.25	-11.5				9.28	-6.5	-6.25	-6.75	-6.25	-7	-6.5	-6.5	-6.75	-6.25
		9.32	-10.25	-10.25	-11.25	-10.75	-11.5	-10.5	-11.25	-11.25	-11				9.32	-6	-6	-6.75	-6	-6.5	-6.25	-6	-6.75	-6.5
		9.36	-10.5	-10.25	-11	-10.75	-11.5	-10.5	-11	-10.75	-10.5				9.36	-6.25	-5.75	-6.75	-6.5	-6.5	-5.75	-5.75	-6.25	-6.5
		9.4	-10.5	-10.5	-10.5	-11.25	-11.75	-10.75	-11.5	-10.75	-10.75				9.4	-6.25	-6	-6.25	-6.75	-7	-6	-6.75	-6.5	-6.25
		9.44	-11.25	-11	-10.5	-11.5	-11.5	-11.5	-11.5	-11.5	-11				9.44	-5.75	-6.75	-6.25	-6.75	-7.25	-6.75	-7	-7	-6.5
		9.48	-11	-11	-10.75	-11	-11.5	-11	-11	-11.75	-11.25				9.48	-5.5	-6.75	-6.5	-6.5	-7.25	-6.5	-6.75	-6.75	-6.75
		9.52	-10.25	-10.75	-10.75	-10.75	-10.75	-11.25	-10.5	-11.25	-11.5				9.52	-6	-6.5	-6.75	-6.75	-6.5	-6	-6.25	-6	-7
		9.56	-10.25	-10.75	-11.25	-11	-10.5	-11	-11	-10.5	-11.75				9.56	-6.25	-6.25	-6.5	-7	-6.75	-5.75	-6	-6	-7
		9.6	-10.25	-10.5	-11.5	-11	-11.25	-10.75	-11.75	-10.75	-11.5				9.6	-6.25	-6	-6.5	-6.5	-7	-6.25	-6.75	-6.25	-6.5
		9.64	-10.25	-10.25	-11.75	-11.25	-11	-10.25	-11.75	-10.75	-11				9.64	-6.25	-6	-7	-7	-6.25	-6.25	-7	-6.75	-6.25
		9.68	-10.5	-10.5	-11.25	-11.25	-11	-10.25	-11.75	-11	-11				9.68	-5.75	-6	-7	-6.75	-6	-6.5	-7.25	-6.75	-6
		9.72	-10.25	-10.5	-11	-10.75	-10.75	-10.5	-11.25	-11.75	-10.75				9.72	-6	-6.25	-6.75	-6.5	-6	-6.75	-7	-7.25	-6.25
		9.76	-10.25	-10.75	-10.75	-10.75	-10.75	-10.75	-11	-11.5	-11				9.76	-6.5	-6.75	-6.5	-6.5	-6	-7	-6.5	-7.25	-6.5
		9.8	-10.5	-10.5	-10.5	-10.75	-11.25	-11.25	-11.25	-11.5	-10.75				9.8	-6.5	-6.25	-6.25	-6.25	-6.25	-7	-6.5	-7	-6.75
		9.84	-10.5	-11	-10.5	-10.75	-11.75	-11.75	-11.75	-11.25	-10.75				9.84	-6.25	-6.25	-6.5	-6.5	-6.75	-7	-6.25	-7	-6.75
		9.88	-10.75	-11.5	-10.75	-10.25	-12	-11.25	-11.25	-11	-11				9.88	-6.75	-6.5	-7	-6.25	-7	-6.25	-6	-6.25	-6.75
		9.92	-11	-11.25	-11	-10	-11.5	-11.25	-11.25	-10.5	-11.25				9.92	-6.75	-6.25	-6.75	-6	-6.75	-6.25	-7	-5.75	-7
		9.96	-11	-10.75	-11	-10.5	-11	-10.5	-11.25	-11	-11.25				9.96	-6.25	-6.25	-6.25	-6.25	-6.75	-5.75	-7.5	-6.25	-7
		10	-10.5	-10.75	-11	-11.25	-10.5	-10.75	-11	-11	-11.25				10	-5.75	-6	-5.5	-6.75	-6.25	-6	-7.25	-6.75	-7
		10.04	-10	-11.25	-11.75	-11.75	-10.25	-11.25	-10.75	-11	-10.75				10.04	-5.5	-6	-6	-7	-6.25	-6	-6.5	-6.75	-6.75
		10.08	-10.5	-11.5	-11.75	-11.25	-10	-11.75	-11	-10.75	-11				10.08	-5.5	-6	-6.75	-6.75	-5.75	-6.5	-6.25	-6.5	-6.75
		10.12	-10.75	-11.5	-11.5	-10.5	-11	-11.75	-11	-10.25	-11.75				10.12	-6.25	-6.25	-7	-6.25	-6	-7	-6.25	-6.25	-6.75
		10.16	-11	-11	-11.5	-10.5	-11	-11.5	-10.75	-10.5	-11				10.16	-6.5	-6.75	-7	-6.5	-6.5	-7.25	-6.25	-6	-6.75
		10.2	-10.75	-10.75	-11.5	-10.75	-10.75	-10.75	-10.75	-10.75	-11				10.2	-6.5	-7	-6.75	-7	-6.5	-6.75	-6.25	-6.5	-6.5
		10.24	-10.5	-10.75	-11.5	-10.75	-11	-10.5	-11	-10.5	-11.25				10.24	-6	-7.5	-6.5	-6.25	-6.5	-6.5	-6.75	-6.5	-6.5
		10.28	-10.5	-10.75	-11	-10.5	-11.5	-10.75	-11	-11	-11.25				10.28	-6.25	-7	-6.5	-5.5	-6.5	-6.25	-6.25	-6.5	-6.5
		10.32	-10.5	-11	-10.5	-10.25	-11	-10.75	-11.25	-11.5	-11.25				10.32	-6.25	-6.5	-6.5	-5.75	-5.75	-6.5	-6	-6.25	-6.5
		10.36	-10	-11	-10.75	-10.75	-11	-11.25	-10.75	-11.5	-11				10.36	-5.75	-6.25	-6.75	-6.25	-5.75	-7	-6	-6.25	-6.5
		10.4	-10.5	-10.75	-10.75	-10.75	-10.75	-11.5	-10.5	-11	-10.75				10.4	-6	-6.5	-6.5	-6.25	-6	-7	-6	-6	-6.5
		10.44	-10.75	-10.75	-10.75	-10.75	-10.5	-11.25	-11	-10.5	-11				10.44	-6	-6.5	-6.75	-6.75	-5.75	-6.75	-6.25	-6	-6.25
		10.48	-11	-11	-11	-10.75	-10.75	-11.25	-11	-10.5	-11.5				10.48	-6	-6.5	-7	-6.75	-6	-6.75	-6.5	-6	-6.5
		10.52	-10.75	-10.5	-11	-11	-11	-11.25	-10	-11.25	-11.75				10.52	-6.5	-6	-6.75	-6.5	-6.5	-6.5	-5.75	-6.75	-6.75
		10.56	-10.75	-10.25	-11	-10.75	-11	-11	-10.25	-11	-11.25				10.56	-6.25	-6.25	-6.25	-6.75	-7	-6.25	-5.75	-6.75	-6.5
		10.6	-10.75	-10	-11	-10.25	-10.5	-10.75	-11	-11.25	-10.5				10.6	-6.25	-6.5	-5.75	-6.75	-6.5	-6	-6	-6.5	-6.25
		10.64	-10.5	-10.25	-11.25	-10.5	-11	-10.5	-11.5	-11.5	-10.75				10.64	-6.5	-6.25	-6.25	-6	-6.75	-5.5	-6.5	-6.75	-6.25
		10.68	-10.25	-10.75	-10.75	-11	-10.75	-10.75	-11.5	-11.25	-11.25				10.68	-6.5	-6.5	-6.25	-6	-7	-6	-6.75	-7	-7.25
		10.72	-10	-11.5	-10.5	-11.75	-10.75	-11	-11.25	-11.5	-11.25				10.72	-6.25	-6.5	-6.5	-6.75	-6.5	-6.25	-6.75	-7.5	-7.5
		10.76	-10.25	-11.5	-10.5	-11.25	-11.25	-11	-11.5	-11.25	-11.5				10.76	-6.25	-6.5	-6.5	-6.5	-6.75	-6.75	-7	-7.25	-7.25
		10.8	-10.25	-11.25	-10.75	-11.25	-11.75	-11.25	-11	-11.25	-11.5				10.8	-6.5	-6.25	-6.25	-6.75	-6.75	-7.25	-6.75	-7	-7
		10.84	-10.75	-11	-10.75	-11	-12.25	-11.5	-11.25	-11	-11.5				10.84	-6.75	-6.25	-6.5	-6.25	-7	-7.25	-7	-6.75	-6.5
		10.88	-11.25	-11	-11.25	-11.75	-11.5	-11.25	-11.25	-11	-10.75				10.88	-7	-6.5	-6.75	-6.5	-6.5	-6.75	-6.75	-6.5	-6
		10.92	-11	-11	-11	-11.75	-11.25	-11	-11.25	-10.75	-11				10.92	-6.5	-6.25	-6.5	-6.75	-6.5	-6.5	-6.75	-6.25	-6.25
		10.96	-10.75	-10.5	-11.25	-10.75	-11	-10.75	-10.75	-10.75	-11.25				10.96	-6.25	-5.75	-6.25	-6.5	-6.25	-6.25	-6.25	-6.75	-6.5
		11	-10.75	-10.25	-10.75	-10.5	-10.75	-11	-10.5	-10.75	-11.75				11	-5.75	-5.5	-6.25	-6.25	-6.75	-6.25	-6.5	-7	-6.75
		11.04	-10.75	-10.5	-10.5	-10.75	-10.5	-11	-10.75	-10.5	-11.5				11.04	-6.25	-6.5	-5.75	-6.5	-7	-6.75	-6.5	-6.75	-6.5
		11.08	-10.75	-10	-11	-10.75	-10.5	-10.75	-11	-10.75	-10.5				11.08	-6.5	-6	-5.75	-6.25	-7	-6.5	-6.5	-6.75	-6.5
		11.12	-10.5	-10	-11	-11	-10.75	-11	-11.25	-11	-11				11.12	-6.5	-5.5	-5.75	-6.75	-7	-6.5	-6.5	-6.75	-7
		11.16	-10.25	-10.25	-10.5	-10.75	-11	-11	-11.5	-11.25	-11.75				11.16	-6.25	-5.75	-6	-6.5	-6.75	-7	-6.25	-6.75	-7
		11.2	-10	-10.5	-10.5	-11	-11	-11	-11.75	-11	-12				11.2	-6	-6	-6.25	-6.5	-6.75	-6.5	-6.75	-6.25	-7
		11.24	-10.25	-10.25	-10.5	-10.75	-11	-11	-11.75	-11	-11.5				11.24	-5.5	-6	-6.5	-6.5	-6.75	-6.25	-7.25	-6.5	-6.75
		11.28	-10.25	-9.75	-10.5	-10.5	-10.75	-11.25	-11.5	-11.25	-10.75				11.28	-6	-6	-6	-6.25	-6.75	-6.5	-6.75	-6.5	-6.25
		11.32	-10	-10	-10.75	-10.25	-11	-11.25	-11	-11.25	-10.75				11.32	-6.25	-6	-6	-6	-6.5	-6.75	-6.5	-6.75	-6.25
		11.36	-10.25	-10.75	-11.5	-10.75	-11.25	-11	-11.25	-10.75	-10.5				11.36	-6	-6.25	-6.5	-6	-6.75	-6.75	-7	-6.5	-6.5
		11.4	-10	-11	-11.25	-11	-10.5	-10.5	-11.5	-10.75	-11				11.4	-5.75	-7	-7	-6.25	-7	-6.25	-7.25	-6.25	-6.75
		11.44	-10	-11	-11	-11.25	-10	-10.25	-11.5	-10.75	-10.75				11.44	-5.5	-7.5	-7	-6.5	-6.75	-6	-7.25	-6	-6.5
		11.48	-10	-11.5	-10.5	-11	-10.25	-10.25	-10.75	-10.75	-11				11.48	-5.5	-7.5	-6.75	-7	-6.5	-6	-7	-6	-6.5
		11.52	-10.75	-11.5	-10.5	-10.75	-10.75	-10.75	-10.75	-10.75	-10.75				11.52	-5.75	-7	-6.75	-6.75	-6.5	-6.5	-6.5	-6.5	-6.25
		11.56	-11.25	-11.5	-10.5	-10.25	-11.25	-11	-11	-10.5	-10.5				11.56	-6.25	-6.75	-6.5	-6.75	-7	-6.5	-6.25	-7	-6.25
		11.6	-10.75	-11	-10.75	-10.5	-11.25	-11.25	-11.25	-11.25	-10.75				11.6	-6	-6.25	-6.5	-7	-6.75	-6.5	-6.25	-7	-6.5
		11.64	-10.5	-10.5	-10.5	-10.5	-11	-11	-11.25	-11.75	-11				11.64	-5.75	-6.25	-6.75	-6.75	-7	-6.25	-6.25	-7.25	-6.25
		11.68	-10.5	-10.25	-10	-10	-10.5	-10.5	-10.75	-11.75	-11.25				11.68	-6.25	-6.75	-6.5	-6.25	-6.5	-5.75	-6	-6.75	-6.25
		11.72	-10.25	-10.25	-10	-10.5	-10.5	-10.75	-10.5	-11.5	-11.25				11.72	-6.25	-6.5	-6	-6.25	-6.25	-6.5	-6.25	-6.5	-6.75
		11.76	-10.25	-10.75	-10.5	-10.75	-10.75	-11	-10.75	-11.25	-11				11.76	-6.75	-6.5	-6	-6.25	-6.25	-6.75	-6.5	-6.5	-6.5
		11.8	-10.5	-11	-10.25	-11.25	-10.5	-11.25	-10.75	-11.25	-11.25				11.8	-6.75	-6.5	-6	-6.5	-6	-6.25	-6.5	-6.5	-6.25
		11.84	-10.75	-11	-10.5	-11.25	-11	-11.5	-11	-11.5	-11.25				11.84	-6.75	-6.25	-6.25	-6.5	-6.5	-5.75	-6.5	-6.75	-6.25
		11.88	-10.75	-10.75	-11.25	-11.25	-10.75	-11.5	-10.75	-11.5	-11.75				11.88	-6.5	-6.25	-6.25	-6.75	-6.25	-6.25	-6.25	-7	-6.75
		11.92	-10.75	-10.75	-11.75	-11.25	-11	-10.75	-11	-11.25	-11.5				11.92	-6.5	-6.75	-6.5	-6.5	-6	-6.25	-6.5	-7	-7.5
		11.96	-10.25	-11.25	-11	-10.75	-11.5	-10.75	-10.25	-11	-10.75				11.96	-6.25	-6.75	-6.25	-6.5	-6.5	-6.75	-6.25	-7	-6.75
		12	-10.75	-11.5	-10.5	-10.25	-11.75	-10.75	-10.75	-11.25	-11.25				12	-6.5	-7	-6.25	-6	-7.25	-6.5	-6.25	-6.5	-7
		12.04	-11	-11.25	-11	-10.25	-11.75	-11.25	-11	-11.5	-11.25				12.04	-6.75	-7	-6	-5.75	-7.25	-7	-6	-6.5	-6.5
		12.08	-11	-10.25	-11.25	-11	-11.5	-11.5	-10.75	-11.25	-11.5				12.08	-6.75	-6.5	-6.25	-6	-7.5	-7	-6.75	-6.5	-7
		12.12	-10.5	-10.25	-11.25	-11	-11	-11.5	-10.5	-11.5	-11.5				12.12	-6.5	-6.25	-6.75	-6	-7	-6.75	-7	-7	-7.25
		12.16	-10.25	-10.5	-11	-11	-10.5	-11.25	-10.75	-11.25	-11.25				12.16	-6.25	-6	-6.75	-6.5	-6.5	-6.5	-6.5	-7	-7
		12.2	-10.5	-11	-11	-11	-11.5	-11	-10.75	-10.75	-11.25				12.2	-6.25	-6.5	-6.75	-6.75	-6.75	-6.25	-6.25	-6.5	-7.25
		12.24	-10.5	-11.25	-11.5	-11	-12	-11.5	-11.5	-10.5	-10.75				12.24	-6.75	-6.75	-6.75	-7	-6.75	-6	-6.75	-5.75	-7
		12.28	-10.25	-11.25	-11.25	-10.5	-11.5	-11.25	-11.25	-11	-11				12.28	-6.25	-6.75	-6.75	-7	-6.75	-6.25	-6.75	-6	-7
		12.32	-10	-10.5	-10.75	-10.5	-11.25	-11.25	-11	-11.25	-11				12.32	-6	-6.25	-6.5	-6.75	-7	-6.75	-6.75	-6.5	-6.75
		12.36	-10.25	-10	-10.5	-10.5	-10.75	-10.5	-11	-11	-10.75				12.36	-6.25	-6	-6.5	-6.5	-6.5	-6	-6.75	-6.25	-6.25
		12.4	-11	-9.75	-11	-10.5	-11	-10.75	-11	-10.75	-11				12.4	-6.25	-6	-7	-6.25	-6.5	-6	-6.5	-6.25	-6.5
		12.44	-11.25	-10.25	-10.75	-10	-11	-11	-11.25	-10.5	-11				12.44	-6.5	-6.25	-6.75	-6	-6.75	-6.5	-6	-6	-7
		12.48	-10.75	-10.5	-11	-10.75	-10.75	-11	-11.25	-10.75	-11.25				12.48	-6.25	-6.5	-6.25	-6.25	-6.75	-6.75	-6.5	-6.25	-6.75
		12.52	-10.75	-11	-11	-11.25	-10.5	-10.75	-11	-11	-11.25				12.52	-6.25	-6.75	-6.5	-6.5	-6.75	-6.75	-6.25	-6.75	-6.5
		12.56	-10.25	-11	-11	-11.25	-10.75	-10.5	-11	-11.25	-11.5				12.56	-6.25	-6.5	-6.75	-6.75	-7	-6.5	-6.25	-7.25	-6.5
		12.6	-10.75	-11	-10.75	-11.5	-11	-11	-11.25	-12	-11.5				12.6	-6.75	-6.75	-6.5	-6.75	-6.75	-6.75	-6.5	-7.75	-6.25
		12.64	-10.75	-10.75	-10.75	-11.25	-11.5	-11	-11.25	-12	-11.5				12.64	-7	-6.75	-6.25	-6.25	-6.5	-6.5	-6.5	-7.25	-6.5
		12.68	-10.75	-10.25	-10.75	-10.5	-11.5	-10.5	-11.75	-11.25	-10.75				12.68	-7	-6.5	-6.5	-6	-6	-6	-7.5	-7	-6.25
		12.72	-10.5	-10.75	-11.5	-10.75	-11.25	-10.5	-12.25	-11	-11				12.72	-6.75	-7	-7.25	-6.25	-6.5	-6.25	-7.75	-7	-6.75
		12.76	-10.75	-11.25	-11	-11.5	-11.25	-11	-11.75	-10.75	-11.25				12.76	-6.75	-6.75	-7.25	-6.75	-6.75	-6.25	-7.25	-6.25	-6.75
		12.8	-10.5	-10.5	-10.5	-11.5	-11	-11	-11	-10.5	-11.5				12.8	-6.75	-7	-6.25	-7.25	-6.75	-6.5	-6.25	-6.25	-7
		12.84	-10.25	-10.5	-10.5	-10.75	-10.75	-11	-11	-10.25	-11.25				12.84	-6.5	-7	-6.25	-6.75	-6.25	-6.25	-6.5	-6.25	-6.75
		12.88	-10.5	-10.75	-10.5	-11.25	-11.25	-11	-11.25	-10.75	-11.25				12.88	-6.25	-6.75	-6.25	-7	-6.5	-6.25	-6.75	-6.5	-7
		12.92	-10.5	-10.5	-10.25	-11.5	-11.5	-11	-10.75	-11.25	-11.5				12.92	-6.5	-6.25	-5.5	-6.75	-6.5	-6.5	-6.5	-6.75	-7.25
		12.96	-10.25	-11	-10.5	-10.75	-11.25	-10.75	-11	-11.5	-11.25				12.96	-6.5	-6.25	-5.25	-6	-6.25	-6.5	-6.5	-7	-7
		13	-9.75	-11.75	-11	-10.5	-10.75	-10.5	-10.75	-11.25	-11				13	-6.75	-6.5	-6.25	-5.75	-6.25	-6.5	-6	-6.75	-6.75
		13.04	-10	-11.5	-10.75	-10.75	-10	-10.75	-11	-11	-11				13.04	-6.5	-6.25	-6.75	-6.5	-6.25	-6.5	-6.25	-6.5	-6.75
		13.08	-10.25	-11	-11	-11	-10	-11	-11	-11.25	-11.5				13.08	-6.5	-5.75	-7	-6.75	-6.75	-6.5	-6.25	-6.5	-6.75
		13.12	-10	-11.25	-10.75	-11.75	-10.25	-11.25	-11	-11.25	-11.25				13.12	-6	-6.5	-7	-7.25	-6.75	-6.5	-6.5	-6.25	-6
		13.16	-10	-11.5	-10.75	-11.5	-10.5	-10.75	-11.25	-11.75	-11				13.16	-5.5	-7	-6.75	-6.75	-7	-6.25	-6.75	-6.5	-5.75
		13.2	-9.75	-11.25	-10.75	-11.25	-11	-10.75	-11.75	-11.25	-10.75				13.2	-5.5	-6.75	-6.5	-6.75	-7	-6.25	-6.75	-6	-6
		13.24	-10.75	-11.25	-11	-11.25	-11	-11.5	-11.75	-10.75	-11.25				13.24	-5.75	-6.75	-6.5	-7.5	-6.75	-6.75	-7	-6	-6.75
		13.28	-10.75	-10.75	-11	-10.75	-11.25	-11.75	-11.25	-10	-11.75				13.28	-6.5	-5.75	-6.25	-7	-6.5	-7	-7	-6	-7.25
		13.32	-10.5	-10.75	-10.5	-10.5	-11.5	-11.75	-11.25	-10.25	-12				13.32	-6.5	-6.5	-6.25	-6.5	-6.5	-6.5	-6.75	-6	-7
		13.36	-10.25	-11.25	-10.75	-10.25	-11.5	-12	-11.25	-11	-11.25				13.36	-6.25	-7	-6.25	-6	-6.25	-6.75	-6.5	-6.25	-6.5
		13.4	-10.75	-11	-11.25	-10.5	-11.25	-11.5	-11.25	-10.75	-11.25				13.4	-6.25	-7	-6.5	-6.25	-6.25	-6.75	-6.5	-6	-7
		13.44	-10.5	-10.75	-11.25	-10.5	-11.25	-10.5	-11.25	-11	-11.5				13.44	-5.75	-6.5	-6.5	-6.25	-7	-7	-7	-6.75	-6.75
		13.48	-10.75	-10.5	-10.75	-10.25	-11.5	-10	-11	-11.25	-12				13.48	-6	-6.25	-6.5	-6.25	-7	-6.75	-6.75	-6.75	-6.75
		13.52	-10.5	-11	-10.5	-10.5	-11.25	-10	-11	-12	-11.75				13.52	-6.25	-6	-6.5	-6.5	-6.75	-6.25	-6.5	-7.5	-7
		13.56	-10	-11	-10.5	-10.75	-11	-10.75	-11.25	-11.5	-11.75				13.56	-6	-5.75	-6.25	-6	-6.75	-6.25	-7	-7.25	-7.25
		13.6	-10	-11	-11.25	-11.25	-10.75	-11	-11.25	-11.75	-11.25				13.6	-6	-6.5	-6.75	-6.25	-6.5	-6.5	-7.25	-7.25	-7.25
		13.64	-10.5	-11.25	-11.5	-11	-11	-11	-11.25	-11.5	-11.5				13.64	-6.5	-6.5	-6.75	-6.25	-6.75	-6.5	-6.75	-7.25	-6.75
		13.68	-10.5	-11.25	-11.5	-10.75	-11.25	-10.75	-11.25	-11.5	-11.25				13.68	-7	-6.25	-6.5	-6	-6.75	-6.25	-6.5	-7.25	-6.25
		13.72	-10.5	-10.75	-11	-11.25	-10.5	-11	-11.25	-11.25	-11.75				13.72	-7	-6.5	-6.5	-6.25	-6.25	-6.5	-6.25	-7	-7
		13.76	-10.5	-10.5	-11.25	-10.75	-11	-11.5	-10.75	-11.25	-11.25				13.76	-6.5	-6.5	-6.75	-6.25	-6.5	-7	-5.75	-7	-6.75
		13.8	-11	-10.75	-11.25	-10.25	-11	-11.25	-10.5	-11.5	-11				13.8	-6.75	-6.25	-6.75	-6	-6.5	-7.25	-6	-6.75	-6.75
		13.84	-11	-10.5	-10.75	-10.25	-11	-11	-10.25	-11.5	-11				13.84	-6.5	-6.25	-6.25	-6.25	-6.75	-6.5	-6.25	-6.5	-6.75
		13.88	-11	-10.5	-10.5	-11	-11	-10.75	-10.5	-11	-11.5				13.88	-6.25	-6.25	-5.75	-6.25	-6.5	-6	-6.5	-6.75	-6.75
		13.92	-11.25	-10.5	-10.5	-11	-10.75	-10.75	-10.75	-11	-11				13.92	-6.75	-6.25	-6	-6.25	-6.75	-6.25	-6.5	-7	-6.75
		13.96	-11	-10.75	-11.25	-10.75	-10.5	-11	-10.75	-11	-10.5				13.96	-7	-6.75	-6.75	-6	-6.5	-6.5	-6.5	-6.75	-6.5
		14	-11	-10.75	-11.5	-10.5	-11	-11.25	-11.25	-11.25	-10.75				14	-6.25	-6.75	-6.75	-6.25	-6.5	-7.25	-7	-6.75	-6.75
		14.04	-10.75	-10.75	-11.25	-10.5	-11.25	-10.75	-11.75	-11	-11.25				14.04	-5.5	-6.25	-7	-6.5	-6.5	-7	-7	-6.25	-6.5
		14.08	-11	-11	-10.5	-10.5	-11.5	-10.5	-11.75	-10.75	-11.25				14.08	-5.75	-6.25	-6	-6.75	-6.5	-6.75	-7	-6	-6
		14.12	-11.25	-11	-10.5	-10.75	-11.5	-10.75	-11.5	-10.75	-11.25				14.12	-6.75	-6.5	-5.75	-7	-6.25	-6.25	-6.5	-6	-6
		14.16	-10.75	-11.5	-10.75	-11	-11.25	-11.25	-11	-11	-11.25				14.16	-6.5	-6.75	-6.5	-6.75	-6.5	-6.5	-6	-6.5	-6.25
		14.2	-10.75	-11.25	-10.75	-11.25	-11	-11.5	-11.5	-10.75	-11				14.2	-6.5	-7	-6.5	-6.5	-6.5	-6.75	-6.75	-6.25	-6.75
		14.24	-11	-10.25	-11	-11	-11.25	-11.5	-11.5	-11.25	-11.25				14.24	-6.5	-6.5	-6.75	-6.5	-6.75	-6.75	-6.5	-6.75	-7
		14.28	-10.75	-10	-10.75	-10.75	-11.5	-11.25	-11.25	-11	-11.5				14.28	-6.25	-6	-6.75	-6.25	-7	-6.5	-6.5	-6.75	-7.25
		14.32	-10.75	-10.25	-10.75	-11	-11.5	-11.75	-10.75	-11	-11.5				14.32	-5.75	-6.25	-6.75	-6	-7	-7	-6.25	-6.5	-7.25
		14.36	-10.5	-10.25	-11	-11.5	-10.5	-11.5	-10.75	-11	-11.5				14.36	-5.75	-6.5	-6.5	-6.75	-6.25	-6.75	-6	-6.25	-7
		14.4	-10.25	-10.5	-11.25	-11.75	-10.5	-11.25	-10.75	-11.25	-11				14.4	-6	-6	-6.5	-6.75	-5.75	-6.75	-6	-6.5	-6.5
		14.44	-10.5	-11	-11.25	-12	-11	-10.5	-11	-10.75	-10.75				14.44	-6	-6	-6.75	-7	-6.5	-6.75	-6.5	-6.25	-6
		14.48	-10.5	-11.25	-10.75	-12	-11	-10.75	-11	-10.75	-11				14.48	-6.25	-6.5	-6.75	-7.25	-6.5	-7	-7	-6.25	-6.25
		14.52	-11	-11.25	-10.5	-11.25	-11	-10.75	-11	-11.25	-11.25				14.52	-6.75	-6.25	-6.25	-7	-6.5	-7	-6.75	-6.25	-6.5
		14.56	-11	-11.25	-10.25	-10.75	-10.25	-10.75	-11.25	-11.75	-11.75				14.56	-6.5	-6.5	-6.25	-7	-6	-6.5	-6.75	-6.25	-6.75
		14.6	-10.5	-11	-10.5	-10.5	-10.75	-11	-11	-11.75	-11.25				14.6	-6	-6.75	-6.5	-6.5	-6.5	-6	-6	-6.5	-7
		14.64	-10	-10.25	-10.75	-10.75	-11.25	-11.25	-10.5	-11.25	-10.5				14.64	-5.5	-6.5	-6.25	-5.75	-6.75	-6.25	-6	-6.5	-6.5
		14.68	-10.25	-9.75	-11	-11.5	-11.5	-11.25	-10	-10.75	-10.75				14.68	-5.5	-6	-6	-5.75	-6.25	-6	-6.25	-6.5	-6.25
		14.72	-10.75	-10.5	-10.5	-11.5	-11.25	-11.25	-10.25	-11.5	-11				14.72	-5.75	-6	-6	-6.25	-6	-6	-6.25	-6.75	-6.25
		14.76	-10.5	-10.5	-10.25	-11	-11.25	-11.25	-11	-11.5	-11				14.76	-6	-6	-6	-6.5	-6.5	-6	-6.5	-7	-6.25
		14.8	-10.25	-10.75	-11	-10.5	-11.25	-11.5	-11.25	-11.5	-11.25				14.8	-6.25	-6.25	-6.5	-6.25	-6.75	-6.75	-6.5	-7	-6.75
		14.84	-10.25	-10.75	-11.75	-10.75	-11.5	-12	-11.75	-11.75	-11.5				14.84	-6.5	-6.5	-7.25	-6.25	-7	-7	-7	-7.25	-7.25
		14.88	-10.5	-11	-11.25	-11	-11.5	-12	-11.25	-11.5	-11.25				14.88	-6.5	-7	-6.5	-6.75	-7	-7.25	-6.5	-6.75	-7
		14.92	-10.75	-11.25	-11.25	-11	-11	-11.5	-11	-11	-10.75				14.92	-6	-7	-6.75	-6.75	-6.75	-7	-6.5	-6.75	-6.5
		14.96	-10.25	-11.5	-11.5	-10.25	-10.5	-11.25	-11	-10.75	-11				14.96	-5.5	-7	-6.75	-6	-6	-6.75	-7	-6.5	-6
		15	-10.5	-11.25	-11	-10.25	-10.75	-11.5	-11.25	-11.5	-11.5				15	-5.75	-6.75	-6.5	-5.75	-6	-6.5	-7.25	-7.25	-6.5
		15.04	-10.75	-10.75	-11	-10.75	-11	-11.5	-11.5	-12	-11.75				15.04	-6.25	-6	-6.5	-5.75	-6.25	-6	-7	-7.25	-6.75
		15.08	-11	-10.5	-11	-10.75	-11.5	-11.25	-11.5	-11.75	-12.25				15.08	-6.75	-5.5	-6.5	-6.25	-6.5	-6.25	-6.5	-6.75	-7
		15.12	-11.25	-10	-11.5	-10.75	-11.5	-11	-11.75	-11.25	-12.75				15.12	-6.75	-5.5	-6.5	-6.5	-6.75	-6.5	-6.25	-6.5	-7
		15.16	-11.75	-10.75	-11	-10.25	-11.75	-10.5	-11.25	-11.25	-12.5				15.16	-7	-6	-6.5	-6.25	-7	-6.5	-6	-6.5	-7.5
		15.2	-11	-11.25	-11.5	-10.25	-11.75	-10.5	-11.25	-11.25	-11.25				15.2	-6.25	-7	-6.75	-5.75	-6.5	-6.25	-6.5	-6.75	-6.5
		15.24	-11.25	-11.25	-11.25	-10.5	-11.25	-10.75	-11.25	-11.25	-10.75				15.24	-6.5	-7	-6.75	-5.75	-6.25	-6.25	-6.75	-7	-6.75
		15.28	-10.5	-10.5	-11	-11	-11.25	-11	-10.75	-10.75	-10.75				15.28	-6.25	-6.25	-6.75	-6.5	-6.25	-6.5	-6.5	-6.5	-7
		15.32	-10.5	-10.5	-10.5	-11	-11.75	-11.25	-11	-11	-11				15.32	-6.5	-6.25	-6.25	-6.75	-7	-6.75	-6.75	-6.5	-6.75
		15.36	-11.25	-10.5	-10.5	-11.25	-11.25	-11.25	-11.5	-10.75	-11.25				15.36	-6.75	-6	-6.25	-7	-6.5	-6.75	-6.5	-6	-6.25
		15.4	-11	-11.25	-11.25	-11.5	-10.75	-10.75	-11.5	-11.25	-11.25				15.4	-6.5	-6.75	-6.5	-7.25	-6.75	-6.75	-6.5	-6.25	-5.75
		15.44	-10	-11.5	-11.5	-11.5	-10.75	-11.25	-11.5	-11.25	-10.75				15.44	-5.5	-6.75	-6.5	-7	-6.5	-6.5	-6.5	-6.5	-5.5
		15.48	-9.75	-11.75	-11.25	-11	-10.75	-11	-11.5	-11	-11				15.48	-5.5	-6.75	-6.75	-7	-6.25	-6.25	-6	-6.5	-5.75
		15.52	-10	-12	-10.75	-10.75	-11	-11.25	-11.5	-11	-11.5				15.52	-5.25	-7	-6.5	-6.75	-5.75	-6	-5.75	-6.5	-6.25
		15.56	-10.75	-11.5	-10.5	-10.25	-11	-10.75	-11.75	-11.25	-11.75				15.56	-6	-6.75	-6.5	-5.75	-5.75	-5.75	-6	-6.5	-6.5
		15.6	-10.75	-11	-10.5	-10.5	-10.5	-10.75	-11.25	-11.5	-11.75				15.6	-6	-6.75	-6.75	-6	-5.75	-5.5	-6	-7.25	-6.75
		15.64	-10.25	-10.5	-11.25	-10.5	-10.25	-10.75	-10.25	-11.75	-11.5				15.64	-6.25	-6.25	-7	-6.25	-5.75	-5.75	-5.75	-7.25	-7
		15.68	-9.75	-10.75	-11.25	-10.5	-11	-11.25	-10.75	-11.5	-11				15.68	-6.25	-6.25	-6.75	-6	-6.5	-6.5	-6.5	-7	-6.5
		15.72	-10	-10.75	-11.25	-11.25	-11.5	-12	-10.75	-11.75	-11.5				15.72	-6.5	-6.25	-6.25	-6.5	-7	-7.25	-6.5	-6.75	-6.5
		15.76	-10.25	-10.5	-10.75	-11.75	-11.75	-11.75	-10.75	-11.5	-12.25				15.76	-6.25	-6	-6	-6.75	-6.75	-7.25	-6.75	-6.75	-6.75
		15.8	-11	-10.75	-10.75	-11.75	-11.75	-11.75	-11.25	-11	-12				15.8	-6.5	-6.5	-5.75	-6.75	-6.75	-6.75	-6.75	-6.5	-6.75
		15.84	-11.25	-11.25	-11	-11.25	-11.5	-11.5	-10.75	-10.75	-11.75				15.84	-6.5	-6.75	-6.25	-6.25	-7	-6.5	-6.75	-6	-6.5
		15.88	-11.25	-11.5	-11.25	-11	-11	-11	-11	-11.5	-11.25				15.88	-6.25	-7	-6.25	-6.25	-7	-6.5	-6.75	-6.25	-6.25
		15.92	-11	-11	-11.25	-10.5	-10.5	-11.25	-11.5	-11.25	-11				15.92	-6.5	-6.75	-6.75	-6	-6.5	-7	-6.75	-6.25	-6.25
		15.96	-10.75	-10.75	-11.25	-10.5	-10.25	-11.5	-11.75	-11.5	-11.75				15.96	-6.5	-6.75	-6.75	-5.75	-6.25	-7.5	-6.75	-6.75	-6.5
		16	-10.25	-10.75	-11.25	-10.75	-11	-11	-11.5	-11.25	-11.25				16	-6.25	-6.75	-6.5	-6.25	-6.75	-7	-6.75	-7	-6.25
		16.04	-10.5	-10.75	-11	-10.5	-11	-11	-11.25	-11	-10.75				16.04	-6.25	-6.75	-6.25	-6.25	-6.5	-6.75	-6.25	-6.75	-6
		16.08	-10.75	-11	-11.25	-11	-11.25	-11.25	-11.75	-11	-10.25				16.08	-6.5	-6.5	-6.75	-6.75	-6.75	-7	-6.5	-6	-6.25
		16.12	-11	-11	-11.5	-11	-11.25	-10.75	-11.75	-10.75	-11				16.12	-6.25	-6.25	-7.25	-6.75	-6.75	-6.75	-6.5	-6	-6.5
		16.16	-11	-10.75	-10.75	-11	-11.25	-10.75	-12	-10.75	-12				16.16	-6.25	-6.5	-7.25	-6.5	-7	-6.5	-6.75	-6.75	-6.75
		16.2	-11	-10.75	-10.75	-10.75	-11	-11	-12	-11.5	-12.25				16.2	-6.75	-6.75	-6.5	-6.5	-6.5	-6.5	-7.25	-7	-7
		16.24	-10.25	-11	-11	-10.75	-10.75	-11.5	-12	-11.25	-11.75				16.24	-6.75	-6.5	-7	-6.5	-6	-6.5	-7.25	-6.75	-7
		16.28	-9.75	-11	-11.25	-11	-10.75	-10.5	-11.25	-11	-11.5				16.28	-6.25	-6.5	-6.75	-6.75	-6	-6.25	-7.25	-6.5	-6.75
		16.32	-10	-10.25	-11	-11.25	-10.5	-10.25	-11.25	-11	-11				16.32	-5.75	-6	-5.75	-6.75	-6	-6	-7	-6.75	-6.5
		16.36	-10.25	-10.25	-11	-11	-10.5	-11.25	-11.25	-12	-10.25				16.36	-6	-5.75	-6.25	-6.25	-6	-6.75	-6.25	-6.75	-6.25
		16.4	-10.25	-10.75	-10.75	-10.75	-11.25	-11.25	-11.5	-11.75	-10.75				16.4	-6.25	-5.5	-6.25	-6	-6.5	-6.5	-6.25	-7	-6.25
		16.44	-10.25	-11.25	-10.75	-10.75	-11.5	-11.25	-11.5	-11.25	-11.75				16.44	-6.25	-5.5	-6	-5.75	-6.5	-6.25	-6.75	-7	-6.75
		16.48	-10.5	-11	-10.75	-10.75	-11.25	-11.25	-11.5	-11.25	-12.25				16.48	-6.5	-5.5	-6.25	-6	-6.5	-6.5	-6.75	-6.75	-7.5
		16.52	-11	-10.75	-10.75	-10.5	-11	-11	-11.5	-11.25	-12				16.52	-6.75	-6.25	-6.25	-6.25	-5.75	-6.25	-7.25	-6.5	-7.25
		16.56	-11	-10.5	-11.25	-11	-11.25	-11.25	-11.25	-12	-12.5				16.56	-6.25	-6.75	-6.25	-7	-6	-5.5	-7	-6.75	-7.5
		16.6	-11	-10.25	-11.25	-11.5	-11.25	-11.25	-11	-11.75	-12.25				16.6	-6.25	-6.75	-6	-7.25	-6.25	-5.75	-6.75	-6.5	-7.5
		16.64	-11	-10.5	-11	-11.5	-11.25	-11	-11	-11	-12				16.64	-6.5	-6.75	-6	-7	-6.25	-6.5	-6.25	-5.75	-7.25
		16.68	-11.25	-10.75	-11	-11	-11	-11	-10.5	-11.25	-11.75				16.68	-6.75	-6.25	-6.25	-7	-6.25	-6.25	-5.5	-6.5	-7.25
		16.72	-10.5	-11.5	-11.25	-11	-10.5	-11.25	-10.75	-11.25	-11.25				16.72	-6.25	-6.5	-6.75	-7.25	-6.25	-6.75	-5.5	-7.25	-7
		16.76	-10	-11.5	-11.25	-11.25	-11	-11	-11.5	-11	-11.5				16.76	-6	-6	-7	-6.75	-6.75	-7	-6	-6.75	-7
		16.8	-10	-11	-11	-11.5	-11.5	-11.5	-11.25	-11.75	-11.5				16.8	-6	-6	-6.5	-6	-7	-7.25	-6.5	-7	-6.75
		16.84	-10.75	-11.25	-11.25	-11.75	-11.75	-11.75	-11.25	-11.75	-11.75				16.84	-6.5	-6.5	-6.5	-6.75	-7.25	-7.25	-6.75	-7	-7
		16.88	-11	-10.75	-11.75	-11.5	-11.5	-11.25	-11.75	-12	-11.5				16.88	-6	-7	-7	-7.25	-7	-6.75	-7.25	-7.25	-6.5
		16.92	-11	-11	-11.5	-11.25	-11.5	-11	-11.5	-11.75	-11				16.92	-6	-7	-7	-7	-6.75	-6.75	-7	-7.5	-6.25
		16.96	-10.75	-11	-10.75	-11.25	-11.5	-11.25	-11.25	-11	-11.25				16.96	-6	-6.75	-6.25	-6.25	-6.75	-6.5	-6.5	-6.75	-6.5
		17	-10.75	-11.25	-10.5	-11	-12	-11.5	-11.25	-11.25	-11.5				17	-6	-6.5	-6	-6.5	-6.75	-6.5	-6.5	-6.75	-6.5
		17.04	-10.75	-11.5	-10.25	-10.75	-11.75	-11.5	-12	-11.5	-12.5				17.04	-6.25	-6.75	-5.75	-6.75	-6.75	-7	-7.25	-7	-6.75
		17.08	-11	-11.25	-10.5	-11	-11.5	-11.5	-11.5	-11.25	-12.25				17.08	-6.25	-7	-6.25	-6.75	-6.75	-6.75	-6.75	-7	-7.25
		17.12	-11.25	-11.25	-11	-11.5	-10.75	-11.25	-11.25	-11.5	-11.5				17.12	-6	-6.75	-6.75	-6.5	-6.5	-6.25	-6.75	-7.25	-7
		17.16	-11.25	-10.5	-11.5	-11.75	-10.75	-11.25	-11.5	-11.25	-11.5				17.16	-6	-6.25	-6.75	-6.75	-6.5	-6.75	-6.25	-7	-6.5
		17.2	-11.25	-10.25	-11.5	-11.75	-10.75	-10.75	-11	-11	-11				17.2	-6.75	-6.25	-6.75	-6.5	-6.75	-6.75	-6.25	-6.5	-6
		17.24	-11	-10.25	-11	-11	-11	-11.25	-10.75	-11.25	-11.25				17.24	-6.75	-6	-6.75	-6.25	-6.75	-6.75	-6.5	-6.5	-6
		17.28	-11.5	-10.25	-10.75	-11	-11.25	-11.25	-10.75	-11.75	-11.25				17.28	-7	-6	-6.5	-6.75	-7.25	-6.25	-6.75	-7	-6.25
		17.32	-10.75	-11.25	-11	-10.5	-11.75	-10.75	-11	-12	-11.25				17.32	-6.75	-5.75	-6.25	-6.5	-7.25	-6.5	-6.75	-7.25	-6.75
		17.36	-10.5	-11.25	-11.25	-11	-11.75	-11.25	-11	-11.75	-11.75				17.36	-6.5	-6.25	-6.75	-6.5	-7	-6.5	-6.75	-7.25	-6.75
		17.4	-10.5	-11.25	-11.75	-11.25	-11	-11.5	-11.75	-11.25	-12				17.4	-5.75	-6.75	-7	-6.75	-6.5	-6.5	-7.25	-7	-6.75
		17.44	-10	-10.75	-12	-10.75	-11.25	-12	-12.25	-11	-12.25				17.44	-5.75	-6.25	-7.25	-6.75	-6.5	-6.75	-7.5	-7	-7
		17.48	-10.75	-10.75	-11.5	-11	-11.25	-11.75	-11.5	-11	-11.5				17.48	-6.5	-6.5	-6.75	-7	-6.75	-6.75	-6.5	-6.75	-7
		17.52	-11	-11	-10.5	-11.5	-10.75	-10.75	-11.25	-11	-11.25				17.52	-6.75	-6.5	-6	-7.25	-6.25	-6.5	-5.75	-6	-7
		17.56	-11	-11.25	-10.5	-11.75	-11	-10.5	-11.5	-11.5	-11				17.56	-7	-6.25	-6	-7.25	-6.5	-6.25	-5.75	-6.5	-6.5
		17.6	-11.25	-11.75	-11	-11.75	-11.25	-10.75	-12	-11.75	-10.75				17.6	-6.75	-7	-6.75	-7.25	-6.5	-6.25	-6.75	-7	-6
		17.64	-11	-11.75	-11.5	-12.25	-11.25	-10.75	-11.5	-11.25	-11.25				17.64	-6.5	-6.5	-6.75	-7.5	-6.75	-6.75	-6.5	-6.5	-6
		17.68	-10.75	-11.5	-11.25	-11.75	-11.25	-11	-10.75	-11	-11.75				17.68	-6.5	-6.25	-6.5	-6.75	-6.75	-6.5	-6.25	-6.25	-6.5
		17.72	-10.75	-11.25	-11	-11.5	-11.75	-11.25	-10.75	-11.25	-11.75				17.72	-6.5	-6.5	-6.5	-6.25	-7	-6.5	-6.5	-6.5	-6.5
		17.76	-10.5	-11	-11	-11.25	-11.5	-11.75	-10.75	-11.25	-11.75				17.76	-6.5	-6.75	-7	-6.75	-7.25	-6.5	-6.75	-6.5	-6.75
		17.8	-10.5	-10.75	-11	-11.25	-11.25	-11.75	-11	-11.5	-12.25				17.8	-6.75	-6.75	-6.75	-7	-7	-6.25	-6.75	-6.75	-7
		17.84	-10.75	-10.75	-11.5	-10.75	-11	-11.25	-11.5	-11.75	-12.25				17.84	-7.25	-6.75	-6.75	-6.75	-7	-6	-6.75	-6.75	-7
		17.88	-10.75	-11.25	-11.75	-10.5	-10.75	-11.25	-11.75	-11.75	-12.25				17.88	-7.5	-7	-7	-6.25	-6.5	-6.5	-7	-7.25	-7.5
		17.92	-10.75	-11	-11.75	-10.25	-10.75	-11.75	-11.25	-11.25	-11.75				17.92	-7	-6.25	-7.25	-5.5	-6.5	-6.25	-6.5	-6.75	-7.25
		17.96	-11	-10.75	-11.5	-10.75	-11	-12.5	-11.25	-11	-11.75				17.96	-7	-5.75	-7.25	-5.5	-7	-7	-6.25	-6.75	-7.25
		18	-11	-11	-11.5	-11	-11.5	-12.25	-11	-10.5	-11.5				18	-7	-6	-7.25	-6.25	-6.75	-7	-6.25	-6.5	-6.5
		18.04	-11	-11.5	-11.5	-10.5	-11.5	-11.25	-11.5	-10.75	-10.75				18.04	-6.75	-6.5	-7	-6.5	-6.5	-6.5	-7.25	-6.5	-6
		18.08	-10.75	-11	-11.5	-10.5	-11.5	-11	-11.25	-11	-10.5				18.08	-6.25	-6.5	-7	-6.5	-6.5	-7.25	-7	-6	-5.75
		18.12	-10.5	-11.25	-11.25	-10.75	-11	-11	-11.25	-11	-10.75				18.12	-6.25	-6.5	-6.5	-6.5	-6.25	-6.75	-7	-6.25	-5.75
		18.16	-10.5	-11.25	-11.5	-11.75	-10.5	-11.75	-11	-11.25	-11.5				18.16	-6.5	-6.75	-7	-7	-6.25	-6.75	-7	-6.5	-6.5
		18.2	-10.75	-11.25	-11.75	-12	-10.75	-11.25	-11.75	-11.5	-11.25				18.2	-6.5	-6.75	-6.75	-7.25	-6	-6.5	-6.75	-7	-7
		18.24	-11	-11.25	-11.25	-11.75	-11.25	-11.5	-12.5	-12	-11.25				18.24	-6.25	-7	-6.5	-7.25	-6	-7	-7	-7.5	-7
		18.28	-11	-10.75	-10.75	-11.5	-11.75	-11.25	-11.75	-12.25	-11.25				18.28	-6.25	-6.25	-6.25	-7	-6.25	-6.5	-6.75	-7.75	-7
		18.32	-11	-10.75	-10.5	-11.25	-11.75	-11.75	-11.5	-12.25	-11.75				18.32	-6.25	-6.5	-6	-7	-6.75	-7	-7	-7.75	-6.75
		18.36	-10.75	-10.75	-10.5	-10.75	-11.75	-11.5	-12	-11.75	-11.75				18.36	-6.5	-6.5	-6	-6.5	-7.25	-7.5	-7.25	-7.25	-6.5
		18.4	-11	-10.75	-11	-10.75	-11.5	-11.75	-11.75	-11.75	-11.25				18.4	-7	-6.5	-6.5	-6.5	-6.75	-7.25	-7.5	-6.5	-6
		18.44	-11.25	-10.75	-11.25	-11	-11.25	-11.75	-11.5	-11.25	-11.25				18.44	-7	-6.5	-6.75	-6.5	-6.5	-6.75	-7	-6.25	-6.25
		18.48	-11.75	-11	-11.25	-11.25	-11.5	-11.5	-11.25	-10.75	-11.25				18.48	-7	-6.5	-6.5	-6.75	-6.75	-6.5	-6.75	-6	-6.5
		18.52	-11	-11	-11.25	-11.5	-11.25	-11.5	-11	-10.25	-10.75				18.52	-7	-6.75	-6.75	-7.25	-6.75	-6.75	-6.25	-6.25	-6
		18.56	-10.75	-10.25	-11.25	-11.25	-11.25	-11.75	-10.75	-10.5	-11.25				18.56	-6.75	-6.25	-6.75	-7	-7	-6.75	-5.75	-6.25	-6
		18.6	-11	-10.5	-11.25	-11.5	-11	-11	-11.25	-11	-11				18.6	-6	-6	-6.75	-6.75	-7	-6.5	-6.25	-6.75	-6.25
		18.64	-11	-10.75	-11.5	-11.5	-11	-11.25	-11.75	-11.5	-10.5				18.64	-5.75	-6.25	-7.25	-7	-6.75	-6.25	-6.75	-7.25	-6.5
		18.68	-11	-11.25	-11.75	-11.25	-11.25	-11	-11.5	-12	-11				18.68	-6.25	-6.75	-7	-7	-6.75	-6	-7	-7.5	-7.25
		18.72	-11	-11.25	-11.5	-11.25	-11.25	-11.25	-11.25	-11.5	-11.5				18.72	-6.5	-6.5	-6.75	-7	-6.75	-6	-7.25	-7	-7.25
		18.76	-10.75	-11.5	-11.25	-11.5	-10.75	-11.5	-11.5	-11.5	-11.75				18.76	-6.5	-7	-6.75	-7	-6.5	-6.5	-7.5	-6.75	-6.75
		18.8	-11	-11.25	-10.75	-12	-10.75	-11.5	-11.25	-11.5	-11.5				18.8	-6.25	-6.75	-6.5	-6.75	-6.25	-6.75	-7	-6.75	-6.75
		18.84	-11	-11.25	-10.5	-11.75	-10.75	-11.5	-10.75	-11.25	-11.5				18.84	-6.5	-6.75	-6.75	-6.5	-6.25	-7.25	-6.25	-6.75	-7.25
		18.88	-11	-11	-10.5	-11.5	-11	-11.25	-10.75	-11.25	-11.75				18.88	-6.75	-6.75	-6.75	-6.75	-6.5	-6.75	-6	-6.5	-7.25
		18.92	-11	-11.25	-10.5	-11.75	-11.25	-11	-11.25	-11.5	-12				18.92	-7.25	-7.25	-7	-6.5	-6.75	-6	-6.25	-6.75	-7
		18.96	-11.5	-11	-10.5	-11.5	-11	-11	-12	-11.5	-11.5				18.96	-7.25	-7	-6.75	-6.5	-6.5	-6	-6.75	-7	-6.75
		19	-11	-10.75	-10.5	-11	-11	-10.75	-11.75	-11.5	-11.25				19	-6.75	-6.5	-6	-6.5	-6.5	-6.25	-6.75	-6.5	-6.25
		19.04	-10.5	-10.25	-11	-10.75	-11.25	-10.75	-11.25	-11.5	-11.75				19.04	-6.5	-6.25	-6	-6.5	-7	-6.5	-6.5	-6.5	-6.5
		19.08	-10.5	-10.75	-11	-11	-11	-11.5	-11.25	-11.5	-12				19.08	-6.5	-5.75	-6	-6.75	-6.75	-6.75	-6.75	-6.5	-6.75
		19.12	-10.75	-11	-11	-11.25	-10.75	-11.75	-11.5	-11.5	-12				19.12	-6.75	-6	-6.5	-6.75	-7	-6.75	-6.5	-7	-7
		19.16	-10.5	-11	-11.25	-11.5	-10.5	-12	-11.25	-11.5	-11.5				19.16	-6.25	-6.5	-7	-7	-6.75	-7.5	-6.5	-6.75	-6.25
		19.2	-10.5	-11	-11.25	-11.25	-10.75	-12.25	-11	-11.5	-11.5				19.2	-6.5	-6.75	-6.75	-6.75	-6.5	-7.5	-6.5	-7	-6.25
		19.24	-10.5	-11.5	-11.5	-10.75	-11	-11.75	-11	-11.5	-11.75				19.24	-6.5	-6.75	-6	-6.75	-5.5	-6.75	-6.5	-7.25	-6.5
		19.28	-11	-11.5	-11.5	-11	-11.25	-11.25	-11.25	-11.5	-11.5				19.28	-6.75	-6.5	-6	-6.75	-5.75	-6.5	-6.5	-7	-6.25
		19.32	-11.25	-10.75	-11.5	-11.5	-11.5	-11.5	-11.25	-11.5	-11.5				19.32	-7.5	-5.75	-6.25	-6.5	-6.75	-6.5	-6.5	-6.5	-6.75
		19.36	-11	-10.5	-11.5	-11.5	-11.5	-11	-11.25	-11.5	-11.75				19.36	-7	-5.5	-7	-6.75	-7.25	-6.75	-6.5	-6.5	-7
		19.4	-11.25	-10.75	-11.75	-11.25	-12	-11.5	-11.25	-11	-11.5				19.4	-6.25	-6.5	-7.25	-6.75	-7.5	-6.5	-6.5	-6.5	-6.5
		19.44	-11.25	-11.25	-11.25	-11.25	-12	-11.25	-11.5	-11.25	-11				19.44	-6.25	-6.75	-7	-6.5	-7.75	-6.25	-6.75	-6.5	-6.5
		19.48	-11	-11	-11.5	-11.25	-11.5	-10.75	-12	-11	-11				19.48	-6.25	-7	-7.25	-6	-7.25	-6.25	-7	-6.5	-6.5
		19.52	-11	-11	-11	-10.75	-11.25	-11.25	-11.75	-11.25	-11.75				19.52	-6	-7	-7.25	-6.25	-6.5	-6.25	-6.75	-6.5	-7.25
		19.56	-11	-10.75	-11.5	-10.5	-11	-11.5	-11.5	-11.5	-11.75				19.56	-6	-6.75	-7.5	-6.25	-5.75	-6.5	-6.5	-6.5	-7
		19.6	-10.5	-11.25	-11.25	-11	-11.25	-11.75	-11.25	-11	-11.25				19.6	-6.25	-6.75	-7	-6.5	-5.75	-7	-6.5	-6	-6.75
		19.64	-10.75	-11.5	-11.5	-11	-11	-11	-11	-11.25	-11				19.64	-6.75	-7	-6.25	-6.25	-6.5	-7	-6	-6.5	-6.5
		19.68	-10.75	-11.75	-11.75	-10.5	-11	-11.5	-11.5	-11.5	-11.5				19.68	-6.75	-7.25	-6.25	-6.25	-7	-7.25	-6.5	-6.75	-6.75
		19.72	-10.75	-11.75	-11.75	-10.5	-10.75	-11.5	-11.5	-11.5	-11.25				19.72	-6.75	-6.75	-6	-6.5	-6.75	-6.5	-6.5	-6.25	-6.25
		19.76	-11.25	-11.5	-11.25	-10.75	-11	-11.75	-11.5	-11.5	-11.25				19.76	-6.25	-6.25	-6	-6.5	-6.25	-6.25	-6.5	-6.5	-6.25
		19.8	-11.25	-10.5	-11.5	-10.5	-11.5	-11.75	-11	-11.75	-11.25				19.8	-6.25	-5.5	-6.5	-6	-6.5	-7	-6.75	-7	-6
		19.84	-10.5	-10.25	-11.5	-11.25	-12	-11.75	-11.25	-11.75	-11.75				19.84	-6.5	-6	-6.75	-6.25	-7.25	-7	-6.75	-6.75	-6.25
		19.88	-10.5	-10.5	-11.5	-11.25	-12.25	-12	-11.25	-11.25	-12				19.88	-6.75	-6.25	-6.75	-6.5	-7.25	-6.75	-6.5	-6.5	-6.75
		19.92	-10.75	-10.75	-11	-11.25	-11.5	-11.75	-11.75	-11.25	-12				19.92	-6.5	-6.25	-6.75	-6.75	-6.5	-6.75	-6.5	-6.5	-6.75
		19.96	-10.75	-11.25	-10.75	-11.25	-10.75	-11.25	-11.75	-11.25	-11.75				19.96	-6.75	-6.25	-6.5	-6.75	-6	-6.25	-6.5	-6.5	-6.75
		20	-10.75	-11	-11.25	-11.75	-10.75	-10.75	-11.25	-11.25	-11.5				20	-6.25	-6	-6.25	-7	-6.25	-5.75	-6.5	-6.5	-6.5
		20.04	-10.75	-11.25	-11.75	-11.5	-11	-11	-11	-11.75	-11.5				20.04	-6.25	-6	-7	-6.5	-6.5	-6	-6.5	-6.75	-6.5
		20.08	-11	-11.25	-11.5	-11.5	-11.5	-11.5	-11	-11.5	-11.75				20.08	-6.25	-6	-6.75	-6.5	-6.75	-6.75	-6.5	-6.5	-6.5
		20.12	-11	-11.75	-10.75	-11.25	-11.25	-11	-11.5	-11	-11.75				20.12	-7	-6.75	-6.75	-6.5	-6.75	-6.25	-6.75	-6.5	-7
		20.16	-11	-11.25	-10.25	-10.75	-11.25	-10.75	-11.5	-11	-11.75				20.16	-6.5	-6.75	-6.5	-6.25	-6.5	-5.75	-7	-7	-7
		20.2	-11.25	-11	-10.5	-10.75	-11	-11.25	-11	-11.5	-12				20.2	-6.5	-6.75	-6.25	-6.5	-6.25	-6	-6.75	-7	-7.5
		20.24	-11	-11.25	-11	-11.5	-10.75	-11.75	-11.75	-11.5	-11.75				20.24	-6.75	-6.5	-6.5	-6.5	-5.75	-7.25	-7	-6.75	-7.5
		20.28	-10.75	-10.75	-11.5	-11.25	-11.75	-11.5	-11.75	-11.75	-11				20.28	-6.25	-6.75	-6.75	-6.5	-6	-7.25	-6.75	-7	-6.75
		20.32	-11	-10.25	-11.75	-11.5	-12	-10.75	-11.75	-11.25	-10.75				20.32	-6.25	-6	-7	-6.25	-6.75	-6.5	-6.75	-6.5	-6.5
		20.36	-10.75	-11	-11.5	-11.5	-11.5	-10.75	-11	-10.75	-11.25				20.36	-5.75	-6.25	-7	-6.75	-7	-5.75	-6.5	-6	-6.5
		20.4	-11	-10.75	-11.25	-11.75	-10.75	-10.25	-11.5	-11	-11.5				20.4	-6	-6.5	-6.75	-7	-6.5	-5.25	-6.75	-6.25	-6.25
		20.44	-11.25	-10.5	-10.5	-12	-10.75	-11.5	-11.75	-11.5	-11.25				20.44	-6.75	-6.75	-6	-6.75	-6.75	-6.25	-7	-6.5	-6.25
		20.48	-11	-10.5	-10.75	-12	-10.5	-12	-11	-11.5	-11.5				20.48	-6.75	-7.25	-6	-6.5	-6.5	-6.75	-6.5	-7	-7
		20.52	-10.75	-10.5	-11.25	-11.25	-10.75	-11.5	-11	-11	-12				20.52	-6.75	-7.25	-6.5	-6.25	-7	-6.75	-6.5	-6.5	-7.5
		20.56	-11	-11	-11.25	-11	-11	-11.25	-11.25	-11.75	-12				20.56	-6.75	-7.25	-6.75	-6.75	-6.75	-6.75	-6.5	-7	-7.5
		20.6	-11.25	-11	-10.75	-11	-11.5	-10.5	-11.75	-12	-11.75				20.6	-6.5	-6.75	-6.5	-6.75	-7	-6.5	-6.75	-7.5	-7
		20.64	-11	-11.25	-11.25	-11.5	-12	-10.5	-11.5	-11.5	-11.75				20.64	-6.25	-6.75	-7	-6.75	-7	-6.25	-6.5	-7	-7.25
		20.68	-11	-11	-11.5	-11.25	-11.5	-11	-11.25	-11.5	-11.75				20.68	-6.5	-6.5	-6.5	-6.5	-6.5	-6.75	-6.75	-6.75	-6.75
		20.72	-11	-11.25	-11.5	-11.25	-11	-11	-11	-11.5	-11.25				20.72	-6.75	-6.25	-6.25	-6.75	-6	-6.5	-7	-7	-6.25
		20.76	-10.25	-11.25	-11.25	-11	-11.25	-11.5	-11.25	-10.75	-11.25				20.76	-6.75	-6.25	-6.5	-6.5	-6.5	-6.5	-7.25	-6.75	-6.5
		20.8	-10.75	-11	-11.25	-11.25	-11.25	-11.5	-11.5	-11	-11.5				20.8	-7	-6.5	-6.75	-6.5	-7	-6.25	-7	-6.75	-6.75
		20.84	-10.75	-11.25	-11	-11	-11.25	-10.75	-11.5	-11	-11.25				20.84	-6.75	-7	-6.75	-6.25	-7.25	-5.75	-7	-6.25	-6.75
		20.88	-10.75	-11.75	-10.5	-10.5	-11.5	-11.25	-11.5	-11.25	-11.75				20.88	-6.75	-7	-6.5	-6.25	-7	-6.25	-7	-6.5	-6.75
		20.92	-11	-11.5	-10.75	-11	-11.75	-11.25	-11.5	-11	-11.75				20.92	-6.75	-7	-6.75	-6.5	-6.75	-6.75	-6.75	-6.5	-6.5
		20.96	-11.5	-11.25	-11	-11.25	-12	-11.5	-11.5	-11.25	-11.5				20.96	-7.25	-6.75	-6.5	-6.75	-7	-6.5	-6.25	-6.75	-6.5
		21	-11.25	-11.25	-11.25	-11.5	-11.5	-11.25	-11.5	-11.75	-12.25				21	-7	-6.5	-6.25	-7	-6.5	-6.25	-6.25	-7	-7
		21.04	-10.5	-10.5	-11	-11.5	-11	-11.75	-12	-12.25	-12				21.04	-6.25	-5.5	-6.25	-7.25	-6.25	-6.5	-7	-7.5	-7
		21.08	-10.75	-11	-11.5	-10.75	-10.75	-12	-12.25	-12	-11.75				21.08	-6.5	-5.75	-6.75	-6.75	-6.5	-6.75	-7.25	-6.5	-6.75
		21.12	-11	-11	-11.5	-11	-10.75	-11.5	-12.25	-11.25	-11.5				21.12	-6	-6.25	-7.25	-6.25	-6.75	-6.5	-7.25	-6.25	-6.75
		21.16	-10.75	-11	-11	-11.75	-11.25	-10.5	-11.5	-11	-11.25				21.16	-5.5	-6.5	-6.75	-6	-6.75	-5.75	-6.75	-6.25	-7
		21.2	-10.25	-11.25	-11	-11.75	-11.75	-10.25	-11.25	-10.75	-11.5				21.2	-5.75	-6.25	-6.25	-6	-6.75	-6	-6.5	-6.5	-6.75
		21.24	-10.25	-11.5	-11.25	-11.5	-11.75	-10	-11.5	-11	-11.5				21.24	-5.75	-6.5	-6.5	-7	-6.25	-5.75	-6.75	-6.25	-6.25
		21.28	-10.25	-11.25	-11	-11.25	-11.5	-10.25	-11.5	-11.25	-11.75				21.28	-5.75	-7	-6.25	-7.25	-6	-5.75	-6.75	-6.25	-6.5
		21.32	-10.25	-11	-10.75	-11.25	-11	-11.25	-12	-11.75	-11.5				21.32	-5.75	-6.75	-6	-6.5	-6.5	-6.5	-7	-6.75	-6.25
		21.36	-10.75	-10.75	-10.75	-11.5	-10.75	-12	-11.75	-11.75	-11.25				21.36	-6.25	-6.5	-6.25	-6.25	-6.5	-6.75	-7	-6.75	-6.5
		21.4	-10.5	-10.75	-11.25	-11.5	-11	-11.75	-11.5	-11.75	-11.75				21.4	-6.25	-6	-6.75	-6.5	-6.75	-6.75	-7.25	-6.75	-7
		21.44	-10.5	-11.25	-11.5	-11.5	-11	-11.25	-11.25	-11.75	-11.75				21.44	-6.25	-6.25	-7	-7	-7	-6.5	-6.75	-6.5	-7
		21.48	-10.5	-11.5	-11.5	-11.5	-11	-11.5	-10.75	-11.25	-11.75				21.48	-6	-7	-6.75	-7.25	-6.75	-6.75	-6.25	-6.5	-7
		21.52	-10.75	-11.75	-11.25	-11.75	-10.75	-11.5	-10.5	-11.25	-11.5				21.52	-6.75	-7	-6.75	-7.5	-6.5	-6.75	-6.5	-6.75	-6.75
		21.56	-10.75	-11.75	-11.25	-11.5	-10.75	-11.25	-11	-11	-11.25				21.56	-7	-7.25	-7.25	-7.25	-6.75	-6.75	-6.5	-6.75	-6.75
		21.6	-11	-11.75	-11.5	-10.75	-10.75	-11.5	-11.5	-11.25	-11				21.6	-7.25	-7	-7	-6.5	-6.75	-6.75	-6.5	-6.5	-6.75
		21.64	-11	-11.25	-11.25	-10.75	-11.25	-11.5	-11.25	-11.75	-10.5				21.64	-7	-6.25	-6.75	-6	-6.75	-6.5	-6.25	-7	-7
		21.68	-11	-10.5	-10.75	-11.25	-11.25	-11.5	-11.25	-11.5	-10.75				21.68	-7	-6	-6.25	-6.5	-6.5	-6.75	-6.5	-7	-6.75
		21.72	-10.75	-10.5	-10.25	-11.5	-10.75	-11	-11.25	-10.75	-11.5				21.72	-6.25	-6	-6	-7.25	-6.5	-6.5	-6.75	-6.5	-7
		21.76	-10.75	-10.25	-11.25	-11.25	-10.75	-11	-11.25	-11	-11.25				21.76	-6	-5.75	-6.25	-7.25	-6.5	-6.25	-7	-6.25	-7.25
		21.8	-11	-10.5	-11	-10.5	-10.75	-11	-11.25	-11	-11.25				21.8	-5.75	-5.75	-6.5	-6.75	-5.75	-6.25	-7.25	-6	-7.25
		21.84	-11.5	-10.5	-11	-11	-11.25	-11	-11.25	-11.5	-12				21.84	-6	-6.25	-6.75	-6.75	-6	-6.75	-7	-6.75	-7
		21.88	-11	-10.75	-11.5	-11.5	-11.75	-10.5	-11.25	-11.75	-12.5				21.88	-5.75	-6.5	-6.75	-6.5	-6.5	-6.25	-6.75	-7.5	-7
		21.92	-11.5	-11.25	-11.75	-11.5	-11.5	-11	-11.75	-11.5	-12				21.92	-6.25	-7.5	-6.75	-6.75	-7	-6	-6.75	-7	-7
		21.96	-11	-11.25	-11.5	-11.25	-11.25	-11.25	-11.5	-11.75	-11.25				21.96	-6.25	-7.5	-6.5	-6.75	-6.75	-5.5	-6.75	-6.75	-6.5
		22	-10.5	-11.5	-11.5	-11	-11.5	-11	-11.5	-12.5	-10.75				22	-6.25	-7	-7	-6.75	-6.75	-6	-7	-7.5	-6
		22.04	-10.5	-11.25	-11	-10.75	-11.25	-11.5	-11.5	-12	-10.75				22.04	-6.75	-6.25	-7	-6.5	-6.75	-6.75	-7	-7	-6.5
		22.08	-10.5	-11	-10.75	-11	-11.25	-11	-11.5	-10.75	-11				22.08	-6.5	-5.75	-7.25	-6.75	-7	-7	-7	-6.5	-6.5
		22.12	-10.5	-11.25	-10.5	-11	-10.75	-10.75	-11.75	-10.5	-11.25				22.12	-7	-5.75	-6.75	-6.5	-6.75	-6.5	-7.25	-6.25	-6.25
		22.16	-10.5	-11.25	-10.5	-11	-11	-11	-11.75	-11	-11.25				22.16	-7	-6.25	-6.5	-6.75	-6.5	-6.25	-7.25	-6.5	-5.75
		22.2	-10.25	-11	-11.25	-11	-11.5	-11	-11.25	-11.5	-11.75				22.2	-6.75	-6.75	-6.75	-7	-6.5	-6.25	-6.75	-6.5	-6.5
		22.24	-10.5	-11	-11.25	-11.25	-12.25	-11	-11	-11.5	-11.75				22.24	-6.25	-7	-7	-6.75	-7	-6.5	-6.75	-6.5	-6.75
		22.28	-10.75	-11	-11.25	-11.25	-12.25	-11	-10.75	-11	-11.25				22.28	-6.25	-6.75	-7.25	-6.75	-7.25	-6.75	-6.75	-6.75	-6.75
		22.32	-11.5	-11	-11	-11	-11.75	-11.5	-10.5	-11.5	-11				22.32	-6.75	-6.75	-6.75	-6.5	-6.75	-7	-6.5	-7	-6.5
		22.36	-11.25	-11.25	-10.75	-11	-11	-11.75	-10.75	-11.5	-11.5				22.36	-6.75	-6.5	-6.25	-6.25	-6.5	-7	-6.5	-7	-6.75
		22.4	-11	-11.25	-11	-11	-11	-11.75	-10.75	-10.75	-11.5				22.4	-6.75	-6.75	-6	-6.5	-6.25	-6.5	-6.5	-6.5	-6.25
		22.44	-10.75	-11.25	-11.75	-11.5	-11.25	-11.5	-11.5	-11	-11.75				22.44	-6.5	-6.5	-6.5	-6.5	-6.25	-6.75	-7	-7.25	-6.5
		22.48	-10.75	-11	-11.75	-11.5	-11.25	-11.25	-11.75	-11	-11.25				22.48	-6.75	-6.25	-7.25	-6.75	-6.5	-6.75	-7	-7.25	-6.75
		22.52	-10.5	-10.5	-11.5	-11.5	-11	-11	-12	-11	-11.5				22.52	-6.25	-6.25	-7.25	-6.75	-6.75	-6.5	-7.25	-6.75	-7
		22.56	-10.75	-10.75	-11	-11.25	-10.75	-11.5	-11.5	-11.25	-12				22.56	-6.5	-6.25	-6.5	-6.25	-6.5	-6.75	-7	-6.5	-7.25
		22.6	-10.75	-10.75	-11	-11	-11	-11.5	-11.25	-10.75	-12.5				22.6	-6.75	-6	-6	-6.25	-7	-7	-6	-6.5	-7.5
		22.64	-11	-11.25	-11	-10.5	-11	-11.25	-11	-10.5	-12				22.64	-7	-6.5	-6	-6.5	-6.75	-6.5	-5.75	-6.5	-7
		22.68	-11	-10.75	-11	-10.75	-11.25	-11	-11	-10.75	-11.25				22.68	-6.75	-6.5	-6.25	-6.25	-6.5	-6.5	-6.25	-6.75	-6.5
		22.72	-11	-10.5	-11.5	-11	-11.5	-10.75	-11	-10.75	-10.75				22.72	-6.25	-6.5	-7	-7	-6.75	-6.5	-6.75	-6.75	-6.25
		22.76	-10.5	-10.75	-11.25	-11	-11.25	-10.75	-11	-11	-10.75				22.76	-6.25	-6.75	-6.5	-6.75	-7	-6.25	-7	-6.5	-6
		22.8	-9.75	-11	-11.25	-11	-10.75	-11.25	-11.25	-11.25	-11				22.8	-5.75	-6.5	-6.75	-7	-7	-6.75	-6.75	-6.25	-6.5
		22.84	-10	-11	-11.25	-10.75	-10.75	-11.5	-11.75	-11.5	-11.5				22.84	-6	-6.5	-6.75	-6.75	-7	-7.25	-6.5	-6.5	-6.75
		22.88	-10.25	-11	-11	-10.75	-11	-11	-11.75	-11.25	-12.25				22.88	-6	-7	-6.75	-6.75	-6.75	-6.5	-6.5	-6.5	-7.5
		22.92	-10.5	-10.75	-11	-11.25	-11.25	-10.75	-11.75	-10.75	-11.75				22.92	-6.5	-6.75	-6.75	-6.5	-6.75	-6	-6.75	-6.5	-7.5
		22.96	-10.75	-11	-11.5	-11.25	-11.5	-10.75	-11.75	-10.75	-11.25				22.96	-6.75	-7	-7.25	-6.5	-6.5	-5.75	-6.75	-6.5	-7
		23	-10.75	-10.75	-11.5	-11.5	-11.5	-10.75	-11.75	-11.5	-11.5				23	-6.75	-7	-7	-6.5	-6.75	-5.75	-6.75	-7.25	-6.75
		23.04	-10.75	-11.25	-11.5	-11.5	-10.75	-11	-11.5	-11.75	-11.5				23.04	-6.25	-7.25	-6.75	-6.5	-6.75	-6.25	-7	-7.5	-6.75
		23.08	-11	-11.75	-11	-11.25	-10.75	-11.5	-11.5	-11.5	-11.5				23.08	-6.75	-7.25	-6.5	-6.25	-6.5	-6.5	-6.75	-7	-6.5
		23.12	-10.75	-11	-10.5	-11.5	-10.75	-11.5	-11.5	-11.25	-11.5				23.12	-6.75	-6.75	-6.75	-7	-6.5	-6.75	-6.25	-6.25	-6.75
		23.16	-11	-10.5	-10.5	-11.5	-10.75	-11.25	-11.5	-11.25	-11				23.16	-6.75	-6.25	-6.5	-7.25	-6.75	-7	-6.5	-6.25	-6.5
		23.2	-11.25	-10.25	-11	-11.5	-10.75	-11	-11.75	-10.75	-11				23.2	-6.75	-6	-6.5	-7	-6.5	-7	-7	-6	-6.5
		23.24	-11.25	-10.5	-11.75	-11.25	-10.75	-11	-11.25	-11.25	-11				23.24	-6.5	-6	-7.25	-6.5	-6.5	-6.5	-6.5	-6.5	-6.5
		23.28	-11	-10.25	-11.75	-11.5	-11.25	-10.75	-11.25	-11.5	-11.25				23.28	-6.25	-6	-7.5	-7	-6.75	-6.5	-6.75	-6.75	-6.5
		23.32	-10.75	-10.75	-11.5	-11.5	-11	-10.25	-10.75	-11.5	-11.25				23.32	-6	-6.25	-7.75	-7	-6.5	-6.25	-6.75	-7	-7
		23.36	-10.75	-11.25	-11.25	-11.75	-11	-10.75	-10.25	-11.75	-11.5				23.36	-6	-6.5	-7	-7	-6.5	-6	-6.75	-7.25	-7.25
		23.4	-10.5	-11.25	-10.5	-11.25	-10.5	-11.25	-10.25	-11.75	-11.75				23.4	-6	-6.5	-6	-7	-6.5	-6.5	-6.25	-7	-7.25
		23.44	-10.25	-11.25	-10	-10.75	-10.75	-11.75	-10.5	-11.5	-11.75				23.44	-6.5	-6	-5.75	-7	-6.5	-6.75	-6	-6.75	-7.25
		23.48	-10.75	-11.25	-10.5	-10	-11	-11.75	-10.5	-11.25	-11.5				23.48	-6.75	-6.25	-6.5	-6.75	-6.5	-6.75	-6	-6.75	-6.75
		23.52	-10.75	-11.5	-11	-10	-11	-10.75	-11	-11.5	-11.5				23.52	-6.75	-7	-6.75	-6.25	-6.25	-6.5	-6.25	-7	-6.75
		23.56	-10.5	-10.75	-11	-10.5	-10.75	-10.25	-11	-11.5	-11.5				23.56	-6.75	-7	-6.75	-6	-6.25	-6.5	-6.25	-6.75	-6.75
		23.6	-10.75	-10.75	-10.75	-10.75	-11	-10.5	-10.75	-10.75	-11.25				23.6	-6.75	-6.75	-6.75	-6	-6.5	-6.5	-6	-6.25	-6.75
		23.64	-11	-10.5	-11	-11	-11.25	-11	-11	-10.75	-11				23.64	-6.75	-7	-6.5	-6.5	-6.5	-6.75	-6.75	-6.25	-6.5
		23.68	-11	-10.75	-11	-10.75	-11	-11	-11.25	-10.5	-11				23.68	-6.75	-7.25	-6.75	-6.75	-6.5	-7	-7.25	-6	-6.5
		23.72	-11.25	-10.5	-11	-10.75	-11.25	-10.5	-11	-11	-11.25				23.72	-6.75	-7	-6.75	-7	-6.75	-6.5	-7	-6.5	-6.5
		23.76	-11.25	-10.75	-11	-11	-11.25	-11.25	-10.75	-11.5	-11				23.76	-6.5	-6.5	-6.25	-6.75	-7	-6.75	-6.5	-7	-6.5
		23.8	-10.75	-11	-11.25	-11	-11.25	-11.25	-10.75	-11	-10.75				23.8	-6.75	-6.25	-6.75	-6.5	-6.75	-7	-6.5	-6.25	-6.5
		23.84	-10.75	-11	-11.5	-11.25	-11.25	-11	-10.75	-11	-11.25				23.84	-6.75	-6.5	-6.75	-6.5	-6.75	-6.5	-6.25	-6.25	-7.25
		23.88	-11.25	-11.25	-11.25	-11.5	-11.25	-11.5	-10.75	-10.75	-11.25				23.88	-7.5	-6.75	-6.5	-7	-6.75	-6.75	-6	-6.25	-7
		23.92	-11.25	-10.75	-11	-11.5	-11.25	-11.5	-11	-11	-11.25				23.92	-7.5	-6.75	-6.75	-7.25	-7.25	-6.75	-6.5	-6.5	-7
		23.96	-11.25	-10.5	-11.25	-11.25	-11.25	-11.5	-11	-10.75	-11.25				23.96	-7.25	-6.5	-6.75	-7	-7.25	-7.25	-7	-6.75	-6.75
		24	-11	-10.75	-11.5	-11.25	-11	-11.25	-11.25	-10.75	-11.5				24	-6.5	-6.5	-6.25	-7.25	-7	-6.75	-7	-7	-6.75
		24.04	-11.25	-11.25	-11.25	-11.5	-11	-11	-11.5	-11.25	-11.75				24.04	-6	-7	-6.25	-7	-6.5	-6.25	-7.25	-7	-6.75
		24.08	-10.75	-11.25	-11	-11.25	-10.75	-11	-11.5	-12.25	-11.75				24.08	-5.75	-6.75	-6.5	-6.75	-6	-6	-6.75	-7	-6.75
		24.12	-10.25	-11.25	-10.75	-11.25	-10.75	-11	-11	-11.75	-11.75				24.12	-5.75	-6.25	-7	-6.5	-6.25	-6.25	-7	-6.5	-6.5
		24.16	-10.25	-11	-10.5	-11.5	-10.75	-11.5	-10.75	-11	-12				24.16	-6	-6	-6.75	-6.5	-6.75	-6.75	-6.5	-6.75	-6.75
		24.2	-10	-10.75	-10.75	-11.25	-10.75	-11.5	-10.75	-10.5	-11				24.2	-6.5	-6.5	-6.75	-6.25	-6.5	-6.5	-6.25	-6.75	-6.25
		24.24	-10.5	-10.75	-11	-11	-11	-11.5	-11	-10.5	-11				24.24	-7	-7	-6.5	-6.75	-6.5	-6.75	-6.25	-6.5	-6.75
		24.28	-11.25	-11	-10.5	-10.5	-11.5	-11	-11.25	-11.25	-10.75				24.28	-7.5	-7.25	-6.75	-6.75	-7	-6.5	-7	-6.75	-6.5
		24.32	-11.5	-11.25	-10.25	-10.5	-11.75	-10.5	-11.5	-12	-10.75				24.32	-7	-7	-6.25	-6.75	-7.25	-6.25	-7.25	-7.25	-6.25
		24.36	-11	-11.25	-10.75	-10.75	-11.25	-10.25	-11.25	-11.75	-10.75				24.36	-6.5	-6.5	-6.75	-6.5	-6.75	-5.75	-7.25	-6.75	-6.5
		24.4	-11	-11	-11.25	-10.75	-10.5	-10.5	-11.25	-11	-11				24.4	-6.75	-6.5	-7.25	-6.5	-6	-5.75	-7.25	-6.75	-6.5
		24.44	-11.25	-11	-11.5	-10.75	-10.5	-11	-11.25	-10.5	-10.75				24.44	-7.25	-7.25	-7.5	-7	-6.25	-6	-7.5	-6.75	-6.5
		24.48	-10.75	-10.75	-11.75	-10.75	-10.5	-11.5	-11.25	-10.5	-11.75				24.48	-7	-6.75	-7	-7.25	-6.25	-6.75	-7.25	-6.5	-6.75
		24.52	-10	-11	-11.5	-10.5	-10.75	-11.5	-11.5	-10.5	-11.5				24.52	-6.5	-6.5	-6.75	-6.25	-6.5	-7	-6.75	-6	-6.5
		24.56	-10	-11	-11.25	-11	-10.75	-11.75	-11	-11	-11				24.56	-6.25	-6.25	-6.75	-6	-6.5	-6.75	-6	-6.5	-6.5
		24.6	-10.25	-10.5	-11.25	-11.75	-10.75	-11.75	-11	-11.25	-10.75				24.6	-6	-6.25	-6.75	-7	-6.25	-6.75	-5.75	-6.75	-6.75
		24.64	-10.75	-10.5	-10.75	-11.25	-10.75	-11.5	-10.75	-11.5	-10.5				24.64	-6.75	-5.75	-6.25	-6.75	-6	-6.5	-6	-7	-6.5
		24.68	-10.75	-10.75	-11	-10.75	-11	-11.25	-11.25	-11.25	-10.75				24.68	-6.75	-6	-6	-7	-6.75	-6.25	-6.5	-6.75	-6.75
		24.72	-9.75	-10.5	-11	-11	-11.5	-10.75	-11.5	-10.75	-11.25				24.72	-6	-6	-6	-7.5	-7.25	-6.25	-6.75	-6	-6.75
		24.76	-10.25	-10.75	-11.25	-10.75	-11.5	-10.75	-11.75	-10.25	-11.5				24.76	-6.5	-6.25	-6.5	-6.75	-7.5	-6.5	-6.75	-5.5	-6.25
		24.8	-10.5	-10.75	-11.25	-11.5	-11	-11	-11.25	-10.25	-11.5				24.8	-6	-6.25	-6.5	-6.25	-6.5	-6.75	-6.5	-6	-6.5
		24.84	-10.75	-10.75	-10.5	-12	-11	-11	-11.25	-11.25	-11.75				24.84	-6.25	-6.5	-6.5	-7	-6.5	-6.75	-6.75	-7	-6.75
		24.88	-10.25	-11	-10.25	-11.75	-11.5	-11	-11	-11.25	-11.75				24.88	-6.5	-6.75	-6	-7	-6.75	-7.25	-7	-7.25	-7
		24.92	-10	-11	-10.5	-11.5	-11.5	-10.5	-11	-10.5	-11.5				24.92	-6	-6.5	-6.75	-7	-6.75	-6.5	-6.75	-7	-6.75
		24.96	-10.25	-11.5	-10.5	-10.5	-11	-10.5	-10.75	-10.5	-11.25				24.96	-6.25	-6.5	-6.75	-6.5	-7.25	-6.25	-6.75	-6	-6.25
		25	-10.25	-11.5	-10.5	-10.25	-11	-10.5	-11	-10.75	-11.5				25	-6.5	-6.75	-6.5	-6.5	-7.5	-6.25	-6.75	-6	-6.75
		25.04	-10.5	-11.25	-10.75	-10.5	-11.25	-10.5	-12	-11.25	-11.75				25.04	-6.75	-7	-6.75	-6.5	-7.25	-6.25	-7.5	-6.5	-7.25
		25.08	-11	-11.25	-11	-11.5	-11.25	-10.5	-11.75	-11	-11.5				25.08	-6.5	-6.75	-6.5	-7.25	-7	-6	-7.5	-6.75	-7.5
		25.12	-11	-11.5	-11.5	-11	-10.75	-11	-11.25	-11.25	-11.75				25.12	-6.75	-6.25	-6.25	-6.75	-6.75	-6	-6.75	-7	-7.75
		25.16	-10.75	-11.5	-11.75	-10.5	-10.75	-11.5	-11	-11	-12.5				25.16	-7	-6.5	-6.75	-6.5	-6.25	-6.25	-6.5	-6.5	-7.75
		25.2	-10.25	-11	-11.25	-10.25	-10.5	-11.5	-11.25	-11	-11.75				25.2	-6.5	-6.5	-6.5	-6	-6.25	-6.5	-6.75	-6.25	-7
		25.24	-10.25	-10.75	-10.5	-10.75	-11	-11.25	-11	-11	-11.25				25.24	-6.25	-6.25	-6.25	-6.25	-6.25	-7	-6.75	-6.25	-7
		25.28	-10.75	-10.5	-10.5	-10.75	-10.75	-11.25	-10.5	-11.25	-11				25.28	-6.75	-6.25	-6.25	-5.75	-6.25	-7	-6.25	-6.25	-6.75
		25.32	-11	-10.5	-10.5	-10.5	-10.5	-11	-10.75	-10.75	-11				25.32	-6.75	-6.25	-6.25	-5.75	-6	-7	-6.5	-6.5	-6.5
		25.36	-11	-10.5	-10.5	-10.25	-10.5	-10.5	-10.5	-11.25	-10.5				25.36	-6.75	-6.25	-6	-6	-6	-6.25	-6.25	-7	-6.25
		25.4	-10.75	-10.25	-10.75	-10.5	-10.75	-10.5	-10.5	-11	-10.25				25.4	-6.5	-6.25	-6.75	-6.5	-6	-5.75	-6.5	-7	-5.75
		25.44	-10.75	-10.25	-10.75	-10.75	-11	-10.5	-10.5	-11	-10.75				25.44	-6.5	-6.75	-6.75	-6.5	-6.25	-6	-6.5	-6.75	-5.75
		25.48	-11	-11.25	-10.5	-11.25	-11	-10.75	-10.75	-11	-11.5				25.48	-6.25	-6.75	-6.75	-6.75	-6.5	-6.25	-7	-6.25	-6.5
		25.52	-11.25	-12	-10.5	-11.25	-10.5	-10.75	-11	-11.25	-11.75				25.52	-6.75	-6.75	-6.5	-7.25	-6	-6.5	-7	-6.25	-6.75
		25.56	-11	-11.5	-10.25	-11.25	-10.25	-10.75	-11	-11.5	-12				25.56	-6.5	-6.5	-6.25	-7	-5.75	-7	-6.75	-6.75	-7.25
		25.6	-10.75	-11.25	-10.25	-11	-10.25	-10.75	-11	-11.5	-11.5				25.6	-6	-6.5	-6.25	-6.75	-6	-6.75	-6.5	-6.75	-7
		25.64	-11	-11	-10.5	-10.5	-10.5	-10.5	-11.25	-11.25	-11				25.64	-6.25	-6.5	-6.25	-6.75	-6	-6.25	-6.75	-6.5	-6.5
		25.68	-10.75	-10.75	-11	-10	-10.5	-10.5	-11.25	-11	-10.5				25.68	-6.5	-6.75	-7	-6.25	-6	-6	-7.25	-6.75	-6.25
		25.72	-10.5	-10	-11.25	-10.5	-10.25	-11.25	-11.25	-11.25	-10.75				25.72	-6.25	-6.25	-7	-6	-5.75	-6.5	-7	-7	-6.25
		25.76	-10.5	-10.25	-11.25	-11.25	-10.5	-11.25	-11	-11.5	-11				25.76	-6.25	-6.25	-6.25	-6	-6	-6.5	-6	-7	-7
		25.8	-10.25	-10.25	-11.5	-11.5	-10.5	-11.25	-10.5	-11.25	-11				25.8	-6	-6.25	-6.5	-6.25	-6.25	-6.75	-5.75	-6.5	-7.25
		25.84	-10	-10.5	-11	-11.25	-10.75	-12	-10.5	-10.75	-10.75				25.84	-6	-6.25	-6.25	-6.75	-6.25	-7.25	-5.75	-6.25	-7
		25.88	-10.75	-10.75	-10.75	-10.5	-11.5	-11.75	-10.5	-11.25	-11				25.88	-6.75	-6.25	-6.25	-6.25	-6.5	-6.75	-5.75	-7	-6.75
		25.92	-10.5	-11.25	-10.75	-10	-11.5	-11.25	-10.75	-11.25	-11.5				25.92	-7	-7.25	-6.75	-6	-6.5	-7	-6	-7	-6.75
		25.96	-10	-11.5	-10.75	-10.25	-11	-11.25	-11.25	-10.75	-11.25				25.96	-6.5	-7	-6.5	-6.5	-6.5	-7	-6.5	-6.5	-6.5
		26	-10.25	-11.25	-11	-11	-11.5	-11.25	-11.25	-10.5	-10.5				26	-6	-6.5	-6.5	-6.5	-7	-6.25	-6.75	-6.25	-6.25
		26.04	-10.5	-10.75	-11	-11.5	-11.25	-11.25	-10.75	-11	-10.25				26.04	-5.75	-5.75	-6.5	-7	-6.75	-6.25	-6.75	-6.25	-6
		26.08	-10	-10	-11	-11.5	-11.25	-11.25	-10.5	-11.5	-11				26.08	-5.75	-5	-7	-6.75	-6.5	-6.5	-6.5	-6.75	-6.5
		26.12	-9.75	-9.75	-10.75	-11	-11.75	-11	-10.75	-11.75	-11.25				26.12	-6.25	-5.5	-7	-6.25	-7	-6.5	-6.5	-7.5	-6.5
		26.16	-10	-10	-10.75	-11	-11.5	-10.5	-10.75	-11.25	-11.5				26.16	-6.25	-6	-7.25	-6.25	-6.75	-6	-6.5	-7.25	-7
		26.2	-10.25	-10.5	-11.25	-10.75	-11	-10.75	-11.25	-10.75	-11.5				26.2	-6.25	-6.25	-7.25	-6.25	-7	-6.5	-6.75	-6.75	-7.25
		26.24	-10.75	-10.75	-10.75	-11	-11	-11	-11	-10.75	-12				26.24	-6.5	-6.5	-6.5	-6	-7	-6.75	-6.5	-7	-7.5
		26.28	-10.75	-11	-11.25	-11	-10.25	-11.25	-10.75	-11.25	-12.5				26.28	-6.75	-6.5	-6.5	-6.75	-6.5	-7	-6.25	-7	-7.25
		26.32	-10.25	-10.5	-11	-11	-10.5	-11.25	-10.25	-11.25	-12.25				26.32	-6	-6.5	-6.5	-7	-6.75	-6.75	-6.5	-6.75	-7
		26.36	-10.5	-10.75	-10.5	-10.75	-10.75	-11.25	-10.25	-10.5	-11.5				26.36	-5.75	-6.5	-6.75	-6.75	-6.75	-6.5	-6.25	-6.5	-6.75
		26.4	-11	-10.5	-11	-11	-11.5	-10.75	-11.5	-10.25	-10.5				26.4	-6.25	-6.5	-6.75	-6.5	-7	-6.25	-6.75	-6.25	-6.5
		26.44	-10.75	-10.75	-10.75	-10.75	-11.5	-10.75	-11.5	-10.75	-10				26.44	-6	-6.5	-6.25	-6.75	-6.5	-6.25	-6.5	-6.5	-6.25
		26.48	-10.5	-10.5	-10.5	-10.25	-11	-11	-11.75	-11.25	-10				26.48	-5.75	-6.75	-6	-6.5	-6.25	-6.5	-6.5	-6.5	-6.25
		26.52	-10.75	-10.5	-10.75	-10.5	-10.75	-11	-11.75	-11.25	-11				26.52	-6.25	-6.5	-6.75	-6.5	-6.25	-6.5	-6.5	-6.25	-6.5
		26.56	-10.25	-11.25	-10.5	-11	-10.75	-11	-11.5	-10.75	-11				26.56	-6	-6.75	-6.5	-6.75	-6.5	-6.5	-6.5	-5.5	-6.25
		26.6	-11	-11.75	-10.25	-11.5	-11	-11.25	-11	-11	-10.75				26.6	-6.5	-6.75	-6.5	-7	-6	-6.5	-6.75	-6	-6.25
		26.64	-11	-12	-11.25	-12	-10.75	-10.75	-11.25	-10.75	-11.25				26.64	-6.75	-7	-7.25	-7	-5.5	-6.25	-7	-6.25	-6.75
		26.68	-10.75	-11.5	-11	-11.25	-10.5	-11	-11.25	-10.75	-11.5				26.68	-7	-7	-6.75	-6.75	-5.75	-6.25	-7	-6.5	-7
		26.72	-10.5	-11	-10.75	-11.25	-10.25	-11.25	-10.75	-11	-11.25				26.72	-6.75	-6.75	-6.5	-6.75	-6.5	-6.25	-6.5	-7	-6.75
		26.76	-11	-11	-10.75	-10.75	-10.5	-11	-10.75	-11	-11				26.76	-6.75	-6.5	-6	-6.5	-6.75	-6.25	-6.5	-6.75	-6.5
		26.8	-10.75	-11.5	-11	-10.75	-10.5	-11.25	-11	-10.25	-11.25				26.8	-6.75	-6.75	-6	-6	-6.25	-6.75	-6.75	-6.25	-7
		26.84	-10.5	-11.5	-11	-10.75	-10.75	-11	-11	-10.5	-11.5				26.84	-6.5	-7	-6.25	-5.75	-5.75	-7	-6.75	-6.75	-7
		26.88	-10.75	-11	-11	-10.25	-10.75	-11.25	-11	-11.25	-10.75				26.88	-6.5	-6.25	-6.5	-5.75	-5.75	-6.75	-6	-7	-6
		26.92	-10.75	-10.5	-11	-10.25	-11	-11	-11.25	-11.75	-11				26.92	-6	-5.75	-6.75	-6.25	-6.25	-6.25	-6.25	-7.5	-6.25
		26.96	-10.25	-10.5	-10.75	-10.25	-10.75	-10.25	-11	-12	-11.25				26.96	-5.5	-6	-6.75	-6.5	-6.5	-5.75	-6	-7.5	-6.75
		27	-10	-10.75	-10.75	-10.5	-10.75	-10.5	-11.25	-12	-11.5				27	-5.75	-6	-6.5	-6.75	-6.5	-6.5	-6.25	-7.25	-6.75
		27.04	-10	-11	-10.75	-11.25	-10.75	-10.5	-11.5	-12	-11				27.04	-6	-6.5	-6.5	-6.5	-6.75	-6.5	-6.75	-7.25	-6.5
		27.08	-10.75	-10.75	-10.75	-11.5	-10.5	-10.5	-12	-11.75	-11				27.08	-6.5	-6.5	-6.75	-6.5	-6.75	-6.5	-7.25	-7.5	-7
		27.12	-10.75	-10.75	-11.5	-11.25	-11	-11	-11.5	-11.5	-10.5				27.12	-6.75	-6.25	-6.75	-6.5	-6.75	-6.25	-6.75	-7	-6.5
		27.16	-10.5	-10.5	-11.25	-11	-11	-10.5	-11	-10.5	-10.25				27.16	-6.5	-6.75	-6.75	-7	-7	-6	-6.5	-6.25	-6.25
		27.2	-10.5	-10.25	-10.75	-10.5	-10.75	-10.75	-10.25	-11	-10.75				27.2	-5.75	-6.5	-6.75	-6.75	-6.5	-5.75	-6.25	-6.5	-5.75
		27.24	-10.5	-10.25	-10.5	-10	-10.5	-10.75	-10.75	-11.5	-11.5				27.24	-5.75	-6.5	-6.25	-6.5	-6.75	-5.5	-6.5	-6.75	-6.5
		27.28	-11	-11	-10.75	-9.75	-10.75	-11.25	-10.5	-11.5	-11.75				27.28	-6.25	-6.5	-6.25	-7	-6.5	-5.75	-6	-7	-7
		27.32	-10.5	-10.5	-10.75	-10.25	-11	-11	-11	-11.5	-11.25				27.32	-6.25	-6.5	-6	-6.5	-6.25	-6.25	-6.5	-7	-6.5
		27.36	-10.25	-10.5	-10.75	-10.5	-11.25	-10.75	-11	-10.75	-11				27.36	-6.25	-6.5	-6	-6.25	-6.75	-6.25	-6.75	-6.5	-6.25
		27.4	-10.25	-11	-10.5	-11.25	-11.25	-10.75	-11.5	-10.75	-10.75				27.4	-5.75	-6.5	-6.25	-6.5	-6.75	-6.25	-7	-6.5	-6.25
		27.44	-10.25	-11.25	-10.5	-11	-11	-11.25	-11.5	-10.75	-10.75				27.44	-5.75	-6.5	-6.25	-6.5	-6.25	-7	-6.75	-6.75	-6
		27.48	-10.5	-11.25	-10.25	-11	-11	-11.25	-11	-10.75	-10.75				27.48	-5.75	-6.5	-5.75	-6.75	-6.25	-6.5	-6.5	-7.25	-6.5
		27.52	-10	-11.25	-10.25	-10.75	-10.5	-11	-10.5	-10.75	-11				27.52	-5.5	-6.75	-6	-6.5	-6.75	-6.5	-6.25	-6.75	-6.5
		27.56	-10	-11	-10.75	-10.5	-10.75	-11	-11.25	-10.75	-11.5				27.56	-6	-6.5	-6.5	-6.5	-6.75	-6.5	-6.75	-6.75	-6.5
		27.6	-10	-10.5	-10.75	-10.5	-10.5	-11.25	-11.75	-10.75	-11				27.6	-6.25	-5.75	-6.75	-6.5	-6	-7.25	-6.75	-6.25	-6.25
		27.64	-10.75	-11	-10.75	-10.5	-10.5	-10.75	-11.25	-11.5	-11				27.64	-6.75	-5.75	-6.75	-6.25	-5.75	-6.5	-6.5	-6.5	-6.25
		27.68	-10.5	-11.5	-11	-11	-10.5	-10.75	-11.5	-11.25	-11				27.68	-6.25	-6.5	-6.75	-6.25	-5.75	-6.25	-6.75	-6.75	-6.75
		27.72	-10.25	-11	-11.25	-11	-11.25	-10.5	-11.25	-11.25	-10.5				27.72	-6	-6.5	-6.75	-6.25	-6.25	-6	-6.75	-6.75	-6.5
		27.76	-10.75	-11	-11.5	-11	-11.25	-10.5	-11	-12	-10.25				27.76	-6	-6.75	-7	-6	-6.5	-6.5	-6.5	-7	-6.5
		27.8	-10.75	-10.75	-11.25	-11.25	-11.25	-10.5	-10.75	-11.75	-10.75				27.8	-6.25	-6.25	-7.25	-6.25	-6.25	-6.5	-6.75	-7	-6.75
		27.84	-10.75	-10.75	-10.75	-10.5	-11.25	-10.25	-10.5	-11.25	-11				27.84	-6.75	-6.5	-6.75	-6	-6.25	-6.25	-6.25	-6.75	-7
		27.88	-10.5	-10.5	-10.25	-10.75	-10.75	-10.25	-10.75	-10.75	-11.25				27.88	-7.25	-6.75	-6.5	-6.5	-6.75	-6.25	-6	-6	-6.75
		27.92	-10.5	-10.25	-10.75	-11.25	-10.25	-10.25	-11	-10.5	-11.25				27.92	-7	-6.75	-6.75	-6.75	-6.5	-6	-6.25	-6.25	-6.5
		27.96	-10.75	-10.5	-11.25	-11	-9.75	-10.25	-10.5	-10.5	-11.75				27.96	-6.75	-6.25	-7	-6.5	-5.75	-6.25	-6	-6.25	-7
		28	-10.5	-10.75	-11.25	-10.75	-10.25	-10.75	-10.5	-11	-12				28	-6.25	-5.75	-7	-6.25	-6	-6.25	-5.5	-6.75	-7.5
		28.04	-10.75	-10.75	-11.5	-11.5	-10.5	-10.75	-10.5	-11.25	-11				28.04	-6.75	-6.25	-7.25	-6.5	-6.5	-6.25	-5.25	-7.25	-7.25
		28.08	-11	-11.25	-11.5	-10.75	-10.75	-10.75	-10.75	-11.25	-10.75				28.08	-6.75	-7	-7.25	-6.25	-6.25	-6.25	-5.75	-7	-7.25
		28.12	-10.75	-11	-11.25	-10	-10.5	-11	-11.25	-11	-11				28.12	-6.5	-6.75	-7	-6.25	-6.25	-6.75	-6.5	-6	-6.75
		28.16	-10.5	-11	-10.75	-10	-10.5	-11.25	-11.25	-11	-11				28.16	-6.75	-6.75	-6.5	-6.5	-6.5	-7	-6.75	-5.75	-6.5
		28.2	-10.25	-10.75	-10.5	-10.25	-11.25	-11.25	-11.5	-11.25	-11				28.2	-6.5	-6.5	-6.5	-6.25	-7	-6.5	-7	-6.25	-6.5
		28.24	-10.5	-10.5	-10.25	-10.5	-11	-11.5	-11.5	-11.5	-11.25				28.24	-6.75	-6.75	-6.25	-6	-6.75	-6.5	-7	-7.25	-6.5
		28.28	-10.5	-10.5	-10.5	-10.75	-10.75	-11.5	-11.75	-11	-11.5				28.28	-6.75	-6.25	-6.25	-6.5	-6.5	-6.75	-7.25	-7.5	-6.5
		28.32	-10.5	-10	-11	-10.75	-11.25	-11.75	-11.25	-10.5	-10.75				28.32	-7	-5.75	-6	-6.25	-7.25	-6.75	-6.25	-7.5	-6.25
		28.36	-10.5	-10	-10.75	-10.75	-11.5	-11	-11.25	-10.5	-10.5				28.36	-6.75	-5.75	-5.75	-6.5	-7	-6.75	-6.25	-7.5	-6.25
		28.4	-10.25	-10	-10.75	-11	-11.25	-10.5	-10.25	-11.25	-11				28.4	-6	-6.25	-6.25	-7.25	-6.5	-6.5	-6	-7.25	-6.5
		28.44	-10.5	-10.25	-11	-11.75	-11	-10.5	-10	-11.25	-11.25				28.44	-6.25	-6.5	-6.75	-7.25	-6.5	-6.25	-5.75	-6.75	-6.5
		28.48	-10.5	-10.75	-11.25	-11.75	-10.5	-11.25	-10.75	-11.25	-11				28.48	-6	-7	-7	-7	-6.5	-6.5	-5.75	-6.25	-6.5
		28.52	-10.5	-11	-11.5	-11.25	-11	-11.5	-11.5	-11.25	-11.5				28.52	-6	-7	-7	-6.5	-6.5	-6.25	-6.5	-6.25	-7.25
		28.56	-10.5	-10.75	-11.5	-10.75	-11.75	-11	-11.75	-11	-11				28.56	-6	-7	-6.75	-6	-6.5	-6.25	-7	-6.75	-7
		28.6	-10.5	-10.5	-10.75	-10.5	-11.75	-11	-11.75	-11	-11				28.6	-6	-6.75	-6.5	-6	-6.75	-6.75	-7.25	-6.5	-6.75
		28.64	-10.25	-10.5	-10.75	-10.5	-11.25	-10.75	-11.75	-10.75	-11				28.64	-6	-6.75	-6.5	-6.5	-7	-7	-7.25	-6	-6.5
		28.68	-10.75	-10.25	-11	-11	-10.75	-10.75	-11.75	-11.25	-11				28.68	-6.75	-6.5	-6.5	-7.25	-7	-6.75	-7	-6.25	-6.25
		28.72	-10.75	-10.5	-11	-11	-10.75	-10.5	-11.5	-12.25	-11.25				28.72	-6.75	-6.25	-6.5	-7	-6.5	-6.5	-7.5	-6.5	-6.5
		28.76	-10.5	-10.75	-10.75	-10.75	-11.25	-10.75	-10.75	-12	-11.25				28.76	-6.25	-6.5	-6.25	-6.75	-5.75	-6	-7.75	-6.25	-6.5
		28.8	-10.5	-10.75	-10.75	-10.25	-11.25	-11.25	-10.5	-11	-11.75				28.8	-6.25	-6.25	-6.25	-6.25	-5.5	-6.5	-7	-6	-7
		28.84	-10.75	-11	-10	-10.75	-11	-11.25	-10.25	-10.25	-11.75				28.84	-6.5	-6.25	-6.25	-6.25	-6	-6.5	-6.25	-6.25	-6.75
		28.88	-11.25	-11.25	-9.5	-11	-10.75	-10.75	-11	-10.75	-11.75				28.88	-6.75	-6	-6	-7	-7	-6.5	-6	-6.5	-6.75
		28.92	-10.75	-11.25	-9.75	-11.5	-10.75	-10.25	-11.75	-11	-11.5				28.92	-6.25	-6.5	-6	-7	-7.25	-6.25	-6.25	-6.5	-6.5
		28.96	-10.75	-11.25	-10.25	-11	-10.75	-10.5	-11.25	-11.25	-11.25				28.96	-6.25	-7	-6	-6.75	-6.75	-6	-6.25	-6.75	-6.75
		29	-10.5	-11.25	-11.5	-10.75	-10.75	-10.75	-11	-11	-11				29	-6	-7.25	-6.75	-6.5	-6.75	-6	-6.25	-6.25	-6.5
		29.04	-10.5	-11	-11.25	-11.25	-11	-10.5	-11	-10.5	-10.75				29.04	-6.5	-6.75	-6.75	-6	-6.5	-6.25	-6.25	-6.25	-6
		29.08	-10.25	-11.25	-11	-11.25	-11.25	-10.75	-10.75	-11	-11.25				29.08	-6.5	-6.5	-6.5	-6.25	-6.5	-6.25	-6.25	-6.5	-6
		29.12	-10.5	-10.5	-11	-11	-11.5	-11.25	-11.25	-11	-11.5				29.12	-6.75	-5.75	-6.5	-6.5	-7	-6.5	-6.75	-6.75	-6.25
		29.16	-10.75	-10	-10.75	-11	-11	-11.75	-11.5	-11	-11.25				29.16	-6.5	-5.75	-6.25	-6.5	-6.75	-7.25	-6.5	-6.75	-6.5
		29.2	-10.5	-11	-10.5	-11	-10.75	-11.5	-11.75	-11.5	-11.25				29.2	-6.25	-6.5	-6	-6.75	-6.75	-7	-6.25	-6.75	-6.5
		29.24	-10.75	-11.25	-11	-10.75	-11	-11	-11.25	-11.75	-11.5				29.24	-6.75	-6.75	-6.75	-6.75	-6.5	-6.5	-6	-7	-7
		29.28	-10.5	-11.75	-11	-10.75	-11	-10.25	-11.5	-11.5	-11.25				29.28	-6.75	-7.25	-7	-6.5	-6	-6	-6.5	-7.25	-7
		29.32	-10.75	-11	-10.75	-11	-11	-10.25	-11.75	-11	-11.25				29.32	-6.75	-7	-7	-6.75	-6.5	-6.25	-6.75	-6.75	-7.25
		29.36	-10.75	-10.5	-10.25	-11.5	-10.5	-10.25	-11.5	-10.75	-11				29.36	-6.75	-6.75	-6.75	-7	-6.5	-6	-6.5	-6.25	-7
		29.4	-10.75	-10.5	-10.75	-11.25	-10.25	-10.5	-11.5	-11.25	-10.75				29.4	-6.5	-6.5	-6.75	-7	-5.75	-5.75	-6.75	-6.25	-6.5
		29.44	-10.75	-11	-11	-10.75	-10.5	-11	-11.5	-11.25	-11				29.44	-6.5	-6.75	-7	-6.75	-6	-6.25	-7	-6.25	-6.5
		29.48	-10.5	-10.75	-11.25	-10.25	-10.75	-11.25	-11.25	-10.75	-11.25				29.48	-6.5	-6.25	-7	-6	-6.25	-6.75	-7.25	-6.75	-6.75
		29.52	-11	-11	-11.25	-10.25	-11.5	-11.25	-11	-10.75	-11.25				29.52	-6.5	-6.5	-7	-6	-6.5	-7	-7	-7	-7
		29.56	-11.25	-11.25	-11.5	-10.75	-11.5	-11.25	-10.75	-11	-11.25				29.56	-6.75	-6.75	-7	-6.25	-6.75	-7.25	-6.75	-7	-7.25
		29.6	-11	-11	-11.25	-10.75	-11.25	-11.25	-11.25	-11.5	-11.25				29.6	-6.5	-6.5	-6.75	-6.5	-6.75	-7.25	-7	-6.75	-7
		29.64	-10.75	-10.75	-11.25	-11	-10.5	-11	-11.5	-11.25	-11				29.64	-6.5	-6.75	-6.75	-7	-6.25	-7.25	-6.75	-6.75	-6.25
		29.68	-10.25	-11	-10.5	-11	-10.5	-11.25	-11.5	-11	-11.25				29.68	-6	-6.75	-6.25	-6.75	-6.25	-6.75	-6.75	-6.5	-6.5
		29.72	-10	-11	-10.25	-11	-10.5	-10.5	-11.25	-11	-11				29.72	-6.25	-6.5	-6.5	-6.75	-6.25	-5.75	-6.75	-6.5	-6.75
		29.76	-10	-11	-10.25	-10.5	-10.5	-10.25	-11	-11.75	-10.75				29.76	-6.25	-6.25	-6.5	-6.25	-6.5	-6	-6.75	-6.75	-6.5
		29.8	-10.5	-11	-10.75	-10.25	-11	-11	-10.75	-11.25	-11.25				29.8	-6.75	-6.5	-6.75	-6.25	-6.5	-7	-6.75	-6.75	-7
		29.84	-10.5	-10.75	-10.75	-10.25	-11.5	-11.25	-10.5	-11	-12				29.84	-7.25	-6.25	-7	-6.5	-6.75	-6.75	-6.75	-6.75	-7.25
		29.88	-10.75	-10.5	-11	-10.75	-11.5	-11.25	-10.75	-11	-12				29.88	-7	-6.25	-6.25	-6.5	-6.75	-6.75	-6.75	-6.75	-7
		29.92	-10.5	-10	-11.5	-11.25	-11.25	-10.75	-11	-11.75	-12				29.92	-6.25	-6.25	-6.25	-6.75	-6.5	-6.25	-6.5	-7	-6.75
		29.96	-10.25	-10.5	-11.5	-10.75	-11	-11	-11.5	-12	-11.75				29.96	-5.75	-6.5	-6.25	-6.25	-6.5	-6.5	-6.25	-6.75	-6.25
		30	-10.25	-10.75	-11.25	-10.5	-11	-11.5	-11.25	-11.5	-11.75				30	-5.75	-6.5	-6.75	-6.25	-6	-6.25	-5.5	-6.5	-6.5
		30.04	-10.75	-11	-11.5	-10.75	-11	-11.5	-11.25	-11	-11.25				30.04	-6.5	-6.25	-7	-6	-6	-6.25	-6.25	-7	-6.5
		30.08	-11	-11.25	-11.25	-11	-11	-11.5	-11	-10.5	-10.5				30.08	-7	-6.75	-7	-6.25	-6.25	-6.25	-7	-7	-6.5
		30.12	-11	-10.5	-10.75	-11	-10.75	-10.75	-10.75	-10.75	-10.5				30.12	-6.75	-6.5	-6.5	-6.5	-6.5	-6.5	-7.25	-6.75	-6.75
		30.16	-10.5	-10.25	-10.75	-10.5	-10.5	-10.75	-10.75	-11.5	-10.75				30.16	-6	-6.5	-5.75	-6.25	-6	-6.5	-6.5	-7	-7
		30.2	-10.5	-10.5	-10.75	-10.5	-10.5	-11	-10.25	-12	-11				30.2	-6	-6.75	-6	-6.5	-6.25	-6	-6	-7.25	-7
		30.24	-10.5	-11.25	-10.75	-11	-10.75	-11	-10.75	-11.75	-11.5				30.24	-6.25	-7	-6.25	-6.5	-6.5	-6.25	-5.75	-6.75	-7.25
		30.28	-10	-11	-11	-11	-11.25	-11	-11.25	-12	-11.25				30.28	-6.5	-6.5	-6.25	-6	-6.5	-6.5	-6.25	-7	-6.5
		30.32	-9.75	-10.75	-10.5	-10.75	-11.25	-11	-11.5	-11.5	-11				30.32	-6	-6.25	-6	-6	-6.25	-6.75	-6.75	-6.75	-6
		30.36	-10	-10.75	-10.25	-11	-11.25	-11	-11.25	-10.75	-11				30.36	-6	-6.25	-6.25	-6.75	-6.25	-7	-7	-6.25	-6.25
		30.4	-10	-11	-10.5	-10.5	-11.25	-11.75	-11.75	-10.5	-11.5				30.4	-6	-6.5	-6.75	-7	-6.5	-7.25	-7.5	-6.25	-6.5
		30.44	-10.25	-11	-10.75	-10.25	-11.25	-11.75	-11.75	-10.75	-11.25				30.44	-6.25	-6.75	-6.5	-6.75	-6.75	-6.75	-7.5	-6.25	-6
		30.48	-10.75	-11.5	-11	-10.75	-11	-11	-11.5	-11	-11				30.48	-6.5	-6.75	-6.75	-6.25	-6.75	-5.75	-7.25	-6.75	-6.25
		30.52	-11.25	-11	-11.5	-11	-11.25	-11	-11.75	-11.25	-10				30.52	-7	-6.5	-6.75	-6	-6.75	-6	-7.25	-7	-6.5
		30.56	-11.25	-11.25	-11.5	-10.5	-11.5	-11.25	-11.25	-11	-10				30.56	-6.25	-6.5	-6.5	-5.75	-6.75	-6.75	-7.25	-6.75	-6
		30.6	-11	-11.25	-11	-10.75	-11.25	-11.75	-11	-11.5	-11				30.6	-6.25	-6.75	-6.25	-6.5	-6.5	-7	-6.75	-7.25	-6.5
		30.64	-10.5	-11	-11.25	-11.25	-11	-11.75	-10.75	-11.75	-11.75				30.64	-6	-6.5	-6.5	-7	-6.25	-6.75	-6	-7.25	-7
		30.68	-10.5	-10.5	-10.75	-11.25	-11	-11.5	-10.5	-11.25	-11.75				30.68	-6.5	-6.25	-6.75	-6.75	-6.75	-6.5	-6	-6.75	-7
		30.72	-11	-10	-10.5	-11.25	-10.75	-11.25	-10.75	-11.25	-11.5				30.72	-6.75	-6	-7.25	-6.75	-6.5	-6.5	-6	-6.75	-6.5
		30.76	-11	-10.25	-10.5	-11.25	-10.75	-11.25	-11.75	-11.25	-11.75				30.76	-6.25	-5.75	-7	-6.75	-6.25	-7	-6.5	-6.5	-7.25
		30.8	-10.75	-11	-10.5	-11.5	-10.5	-11	-11.5	-11.25	-12				30.8	-6.25	-6.5	-6.5	-7	-6	-6.5	-6.75	-6.5	-6.75
		30.84	-10.5	-10.75	-11	-11	-10.5	-10.75	-11.5	-11	-11.25				30.84	-6	-6.25	-5.75	-6.5	-6	-6.25	-6.75	-6.5	-6.5
		30.88	-10.25	-11.25	-11	-10.75	-11.25	-11.25	-11.5	-10.5	-10.5				30.88	-6.25	-6.5	-6	-6.5	-6.75	-6.25	-7	-6	-6.25
		30.92	-11	-11.5	-10.75	-10.75	-11.25	-11.25	-11.75	-11	-11				30.92	-6.75	-6.75	-5.75	-6.25	-6.25	-5.75	-6.75	-6	-6.5
		30.96	-11.5	-11.5	-10.5	-10.75	-11.25	-11.5	-11.5	-11.5	-11				30.96	-7.25	-6.75	-5.75	-6	-6.25	-5.5	-6.75	-6.5	-6.75
		31	-11.5	-11.25	-10.5	-10.75	-11.5	-11	-11.5	-11.5	-11				31	-7	-6.75	-6	-6.25	-7	-5.5	-6.75	-6.75	-6.5
		31.04	-11.25	-11.25	-10.5	-11	-11.25	-10.5	-11.5	-11	-11.25				31.04	-6.75	-6.5	-6.25	-6.25	-7	-6.5	-6.75	-6.5	-6.5
		31.08	-10.5	-11	-10.75	-11	-11	-11.25	-11.25	-11.25	-11.75				31.08	-6.25	-6.25	-6.75	-6	-7	-6.75	-6.75	-6.5	-7
		31.12	-9.75	-11.25	-10.75	-11.25	-11.25	-11.25	-11.75	-11	-11.75				31.12	-5.75	-6.25	-6.5	-6.25	-6.25	-6.75	-7	-6.5	-7.25
		31.16	-10	-11.25	-11.25	-10.75	-11.75	-10.75	-11	-11.25	-11.75				31.16	-6.25	-6.25	-6.5	-6.25	-6.5	-6.5	-7	-6.5	-7.25
		31.2	-10	-11	-11.25	-10.5	-11.25	-10.75	-11	-11.25	-11.75				31.2	-5.75	-6	-6.5	-6.5	-6.5	-6.5	-6.75	-7	-7.25
		31.24	-10.5	-11	-11	-10.5	-11.25	-11	-11.25	-11.75	-11.5				31.24	-6.25	-6.75	-6.25	-6.25	-7	-6.25	-7	-7	-7
		31.28	-11	-11	-11	-10.5	-11.25	-11	-11.5	-12	-11.25				31.28	-6.25	-6.75	-6	-6.25	-7.25	-6	-6.75	-7	-6.5
		31.32	-11.25	-10.75	-11	-10.5	-11.25	-11.25	-11.75	-12	-10.75				31.32	-6.25	-6.25	-6.25	-5.75	-6.75	-6.5	-7.25	-7.25	-6
		31.36	-10.5	-10.75	-11	-11	-11.5	-11.5	-12	-12	-11.25				31.36	-6.5	-6.25	-6.25	-6	-6.5	-6.75	-7.75	-7.25	-6.25
		31.4	-10.75	-10.75	-10.5	-10.5	-11.75	-11.5	-12.25	-11.5	-11.5				31.4	-6.5	-6.5	-6.25	-6	-7.25	-7	-7.5	-7	-6.5
		31.44	-11.25	-11.25	-11	-10.75	-11.5	-11	-11.75	-11.5	-11.25				31.44	-6.75	-6.75	-6.5	-6.25	-7.5	-6.75	-7	-6.25	-6.25
		31.48	-10.75	-11.25	-11.25	-11.5	-11.25	-10.75	-11	-11.5	-11.5				31.48	-6.25	-6.75	-6.75	-6.5	-7	-6.75	-6.5	-6.5	-6.25
		31.52	-10.75	-11.5	-10.75	-11.25	-11.25	-10.75	-10.75	-11	-11.5				31.52	-6.25	-6.25	-6.5	-6.5	-6.75	-6.75	-6.25	-6.25	-6.75
		31.56	-11	-11.25	-10.75	-11.5	-11	-11	-11	-10.75	-11				31.56	-6.25	-5.75	-6.5	-6.5	-6.5	-7.25	-6.5	-6	-6.75
		31.6	-11	-11.25	-10.5	-11.5	-10.75	-11	-11.25	-10.75	-11.25				31.6	-6	-6	-6.5	-6.25	-6	-7	-6.75	-6	-6.75
		31.64	-10.5	-10.5	-10.75	-11.5	-10.5	-11	-11.75	-11	-11.75				31.64	-5.75	-6.25	-6.5	-6.75	-5.75	-6.5	-6.75	-6	-6.75
		31.68	-10.25	-10.5	-10.5	-11.75	-11	-11.25	-11.75	-10.75	-11.5				31.68	-5.5	-6.5	-6.25	-7	-6	-6.5	-7	-6	-7
		31.72	-10.5	-10.5	-10.5	-11.5	-11.75	-11	-11.5	-11	-11.5				31.72	-6	-6.5	-6	-6.75	-6.5	-6.25	-6.75	-6.5	-6.75
		31.76	-10.25	-11	-11.25	-11	-11.25	-11.25	-11	-11.5	-11.25				31.76	-6	-6.75	-6.5	-6.75	-6.5	-6	-6.25	-6.75	-6.75
		31.8	-10.25	-11.25	-11	-10.75	-11	-11.25	-11	-11.75	-11.25				31.8	-6	-6.25	-6.25	-6.5	-6.25	-6.25	-6	-7.25	-6.5
		31.84	-10.25	-11.25	-10.5	-10.75	-10.75	-10.75	-10.75	-11.25	-10.5				31.84	-5.25	-6.25	-6	-6.25	-6.75	-5.75	-6	-7	-6.25
		31.88	-10.25	-11.5	-10.5	-11	-10.75	-11.25	-11	-11.5	-10				31.88	-5.75	-6.75	-6.25	-7	-7	-6	-6.25	-7	-5.75
		31.92	-10.5	-11.25	-11	-11	-10.5	-11.5	-11.5	-11.75	-11				31.92	-7.25	-7	-6.75	-7	-7	-6.5	-6.5	-7	-6.25
		31.96	-10.5	-11	-10.5	-11	-10.5	-11.5	-11.25	-11.75	-11.5				31.96	-7.5	-6.75	-6.25	-6.75	-6.25	-7	-6.5	-6.75	-6.5
		32	-10.25	-10.5	-10	-11.25	-10.75	-11.25	-11	-11.75	-12				32	-6.75	-6.25	-5.5	-6.75	-6.25	-6.75	-6.75	-6.75	-7
		32.04	-10.25	-10.25	-10	-11.25	-10.5	-11.25	-10.75	-11.75	-11.5				32.04	-6	-5.75	-5.25	-6.5	-6.25	-6.5	-6.75	-6.25	-6.5
		32.08	-11	-10.5	-10.5	-11.5	-10.25	-11	-11	-11.25	-11.25				32.08	-6	-5.25	-5.75	-6.25	-6.25	-6.75	-6.75	-6	-6.5
		32.12	-10.75	-10.5	-10.75	-11.5	-10	-11	-11.25	-11.25	-11				32.12	-6	-5.75	-6.25	-6.5	-5.75	-6.5	-6.5	-6.5	-6.25
		32.16	-10.75	-10.5	-11.25	-11	-11	-11.25	-11.25	-11.5	-11.25				32.16	-6	-6.25	-6	-6.75	-6	-6.5	-6.25	-6.75	-6.5
		32.2	-10.5	-11.25	-11.25	-10.75	-11.75	-11.25	-11.25	-11.25	-11.25				32.2	-5.75	-6.75	-6.25	-7	-6.25	-6.25	-6	-6.75	-6.5
		32.24	-11.25	-11.25	-10.75	-10.5	-11.75	-10.75	-11.5	-11.25	-11.25				32.24	-6.25	-6.75	-6.5	-7	-6.25	-6	-6	-6.5	-7
		32.28	-11	-11.5	-11	-11.25	-11.5	-10.5	-11.75	-11	-11.75				32.28	-6.25	-7	-7	-6.75	-6.75	-6.25	-6.5	-6.5	-7
		32.32	-11	-11.5	-10.75	-11.5	-11.25	-11.25	-11.5	-11	-12				32.32	-6.25	-7	-7.25	-6.25	-7	-6.75	-7	-6.75	-7
		32.36	-10.75	-11	-10.5	-11	-11	-11.75	-11.75	-12	-12				32.36	-6	-7	-6.5	-6.25	-6.75	-6.75	-7	-6.75	-6.75
		32.4	-10.75	-11.25	-10.75	-10.5	-11	-11.25	-11.5	-12	-11.75				32.4	-6	-7	-6.5	-6	-6.25	-6.5	-6.75	-7	-6.5
		32.44	-10.75	-11.25	-11	-11	-11	-11.25	-11.75	-11.25	-11.25				32.44	-6	-6.75	-6.75	-6.75	-6.5	-6.75	-6.75	-6.75	-6.25
		32.48	-10.75	-10.5	-11	-11	-10.75	-11	-11.75	-10.75	-11.25				32.48	-6.5	-6.25	-6.75	-7	-6.25	-6.5	-6.75	-6.5	-6.5
		32.52	-10.5	-10.75	-11	-11.5	-10.75	-11	-11.75	-10.25	-11.25				32.52	-6.75	-6.5	-6.75	-6.75	-5.75	-6.25	-6.75	-6.25	-6.75
		32.56	-10.5	-10	-10.25	-11	-10.75	-11	-11.25	-10.75	-11.25				32.56	-6.5	-6	-6	-6.25	-5.75	-6.25	-6.5	-6.25	-6.5
		32.6	-10.75	-10	-10.5	-10.5	-10.5	-11.25	-11.5	-11.25	-11.25				32.6	-6.25	-5.75	-6	-5.75	-6	-6.5	-6.75	-6.5	-6.25
		32.64	-10.25	-10.5	-10.75	-10.75	-10.25	-11.25	-11.5	-11.25	-11				32.64	-5.75	-6.25	-6.25	-6.25	-6.25	-6.75	-6.75	-7	-6.25
		32.68	-10	-11.5	-11	-11	-10.75	-10.75	-10.75	-11.25	-11.25				32.68	-6	-6.75	-6.75	-6.5	-6.75	-6.5	-6.25	-6.5	-6.75
		32.72	-10.75	-11.25	-10.75	-11.25	-11.5	-10.75	-10.75	-11.25	-11.25				32.72	-6.25	-6.25	-6.5	-6.5	-7.25	-6.5	-5.75	-6.25	-6.5
		32.76	-10.75	-10.75	-10.75	-11.25	-11.75	-11.25	-11	-10.75	-11.75				32.76	-6.5	-6.5	-6.5	-6	-7	-6.5	-6	-6.25	-7
		32.8	-11	-10.5	-10.75	-11	-11.75	-11.5	-11.25	-10.75	-11.75				32.8	-7	-6.5	-6.25	-6	-6.75	-6.5	-6.5	-6.25	-7
		32.84	-11.25	-11	-11	-11	-11.75	-11.5	-11.5	-11.25	-11.75				32.84	-7	-7	-6.25	-6	-6.5	-6.5	-7.25	-6.5	-6.5
		32.88	-10.75	-11	-10.75	-11	-11.75	-11	-11.5	-12	-11				32.88	-6.25	-7	-6.75	-6.25	-6.5	-6.25	-7	-6.75	-6
		32.92	-10.75	-11.25	-11.25	-11	-12	-11.25	-10.75	-11.75	-11.25				32.92	-5.75	-6.25	-7	-6.75	-7.25	-6.5	-6.5	-6.5	-6.5
		32.96	-10.25	-11.25	-11.75	-11.25	-12	-11.25	-11	-11	-11.75				32.96	-5.75	-6	-7	-7.25	-7.25	-6.5	-6.5	-6.5	-7.25
		33	-10.25	-11.5	-11	-11.5	-12	-11.25	-11.5	-10.75	-11.5				33	-6	-6.25	-6.25	-7.25	-7	-6.5	-6.5	-6	-7.25
		33.04	-9.75	-11.75	-10.75	-11.25	-11.75	-10.75	-11.5	-10.75	-11.5				33.04	-6	-6.5	-6	-6.5	-7	-6.25	-6.5	-6	-6.75
		33.08	-10.25	-11.25	-11.25	-11.25	-11.5	-10.75	-11	-11.25	-11.25				33.08	-6.25	-6.75	-6.5	-6.75	-6.75	-6.5	-6.5	-6.25	-6
		33.12	-10.5	-10.75	-11.25	-11	-11.25	-11	-11.5	-11.25	-11				33.12	-6.25	-7	-6.5	-6.5	-6	-7	-6.5	-6.5	-6
		33.16	-10.5	-10.75	-10.75	-10.75	-11.25	-11.75	-12	-11	-11.25				33.16	-6	-6.75	-6.5	-5.75	-6	-7.25	-6.5	-6.5	-6
		33.2	-10.75	-11.25	-11	-11	-10.75	-11.5	-10.75	-11.25	-11.5				33.2	-5.75	-6.75	-6.75	-6	-6.25	-6.75	-6	-6.75	-6.5
		33.24	-10.75	-11.25	-11.25	-10.5	-11	-11.5	-10.25	-11.25	-11.5				33.24	-5.75	-6.75	-6.5	-6.25	-6.75	-7	-6.25	-6.75	-6.25
		33.28	-10.5	-10.75	-11	-10.5	-11.25	-11.75	-10.25	-11	-12				33.28	-5.75	-6.5	-6.75	-6.75	-6.5	-7.25	-6	-6.25	-6.25
		33.32	-10.5	-10.5	-11.25	-10.5	-10.75	-11.5	-10.75	-11.5	-11.75				33.32	-6.25	-6.75	-6.75	-6.25	-5.75	-6.75	-6.25	-6.5	-7
		33.36	-11	-10.5	-11	-10.5	-10.25	-10.75	-10.75	-12.25	-11.5				33.36	-6.25	-6.75	-6.5	-6	-5.25	-6.25	-6.75	-7	-7.75
		33.4	-11.5	-11	-10.5	-11	-10.5	-11	-11.5	-11.75	-12				33.4	-6.5	-6.75	-6	-6	-5.75	-6.75	-7.25	-6.75	-7.75
		33.44	-11.25	-11.5	-10.75	-11.75	-10.75	-11.5	-11.75	-11.25	-11.5				33.44	-6.75	-7	-6	-6.5	-6.5	-7	-7.25	-5.75	-6.75
		33.48	-11.25	-11.75	-11.5	-11.75	-11.25	-11.25	-12	-11.5	-11.5				33.48	-7	-7	-6.5	-6.75	-7	-6.75	-7.25	-5.75	-6.75
		33.52	-10.75	-11.5	-11.75	-11.5	-11	-11.25	-11.5	-11.5	-11.25				33.52	-7	-6.75	-6.75	-6.5	-7.25	-6.75	-6.5	-6	-7.25
		33.56	-11	-10.5	-11.25	-10.75	-10.75	-11.5	-11.25	-12	-11.5				33.56	-7	-6	-6.75	-6.5	-6.5	-6.75	-6	-6.75	-7.5
		33.6	-11.25	-10.75	-10.75	-10.75	-11	-11.5	-11.5	-12.5	-11.5				33.6	-6.75	-6.5	-6.75	-6.75	-6.25	-6.75	-6.5	-7.5	-7.25
		33.64	-11	-10.75	-10.5	-11	-11.5	-11.25	-12	-11.75	-11.5				33.64	-6.5	-6.75	-7	-6.75	-6.75	-6.25	-7.25	-7	-6.75
		33.68	-10.75	-10.75	-11	-11	-11	-11.75	-11.75	-11.5	-11				33.68	-6	-6.25	-7	-6.75	-6.5	-6.25	-7.25	-7	-6.25
		33.72	-11.5	-11.5	-10.75	-12	-10.75	-11.5	-11.5	-11.5	-11				33.72	-6.75	-6.5	-6.25	-7.25	-6	-6	-7	-6.75	-6.25
		33.76	-11.5	-11.5	-10.5	-12.25	-11.25	-11.25	-11	-11.5	-11				33.76	-6.75	-6.75	-6	-7	-6.5	-5.75	-6.5	-6	-6.25
		33.8	-10.75	-11.5	-10.5	-11.5	-11.5	-11.25	-11.5	-11.25	-11.5				33.8	-6	-7	-5.75	-6	-6.75	-6.25	-6.5	-6.25	-6.5
		33.84	-10	-11.25	-11	-10.5	-11.5	-11.5	-11.5	-11.75	-11.75				33.84	-5.5	-6.75	-6.5	-5.5	-7	-6.75	-7	-6.5	-6.75
		33.88	-10	-11	-10.75	-9.75	-10.75	-11.25	-11.5	-11.25	-12.25				33.88	-5.75	-6.75	-6.75	-5.5	-6.75	-7	-6.5	-6.5	-7.5
		33.92	-9.75	-11	-11.5	-10	-10.75	-11.25	-11	-10.75	-12				33.92	-6	-6.75	-7	-6.25	-6.75	-7	-6.75	-6.25	-7.5
		33.96	-9.75	-11.75	-11.5	-10.5	-11.25	-11	-11.25	-10.75	-11.25				33.96	-6	-7	-6.75	-6.5	-7	-6.75	-7.25	-6.5	-6.75
		34	-10.5	-12	-11.5	-11	-11.25	-11.25	-11.75	-11.25	-11				34	-6.25	-7	-6.75	-6.5	-6.5	-6.75	-7.25	-6.75	-7
		34.04	-10.5	-11.25	-11	-11.5	-11.25	-11.75	-11.5	-11.5	-11.25				34.04	-6	-6.5	-7	-6.75	-6.5	-6.5	-6.75	-7	-7
		34.08	-11.25	-11	-11	-11.5	-11.5	-12	-11.5	-11.25	-11.25				34.08	-6.5	-6.25	-7	-6.75	-6.75	-6.75	-6.5	-7	-6.5
		34.12	-11	-10.75	-11	-11.5	-11.5	-11.5	-11	-11	-11.25				34.12	-6.5	-6.25	-7	-6.75	-6.25	-6.75	-6.25	-6.75	-6
		34.16	-11	-10.75	-11	-11.5	-11.25	-11	-11.25	-10.75	-11.5				34.16	-6.5	-6.5	-6.75	-6.5	-6.25	-6.25	-6.25	-6.5	-6.25
		34.2	-11	-11.75	-10.75	-11.25	-10.75	-11.5	-10.75	-11.5	-12				34.2	-7	-7.25	-6.5	-6.5	-6.5	-6.5	-6.25	-6.5	-7.25
		34.24	-11	-12.25	-10.75	-11.25	-10.5	-11.5	-10.75	-11.25	-11.5				34.24	-7	-7.25	-6.25	-6.75	-6.75	-6.5	-6.25	-6.75	-7.75
		34.28	-11.5	-12	-10.25	-11.25	-10.5	-11	-11	-11.5	-11.5				34.28	-7.25	-7.25	-6	-7	-6.25	-6.5	-6.5	-6.75	-7
		34.32	-11.5	-11.5	-10.5	-11.5	-10.75	-11	-11.5	-11.75	-11.5				34.32	-6.25	-7	-6	-7.25	-6.5	-6.5	-7	-7	-6.5
		34.36	-11.25	-10.75	-11.25	-11.5	-11	-11.75	-11.75	-12	-11.25				34.36	-6.25	-6	-6.25	-6.75	-7	-7.25	-7	-7.25	-6.25
		34.4	-11	-10.75	-11.25	-11.25	-11	-11.5	-11.5	-12	-11.5				34.4	-6.5	-6	-6.75	-6.5	-6.75	-7	-6.5	-6.75	-6.25
		34.44	-10.75	-10.75	-10.5	-10.75	-11.25	-11	-11.25	-11.75	-11				34.44	-6.5	-6	-6.75	-6.25	-6.75	-6.5	-6.75	-6.25	-6.75
		34.48	-10.75	-10.75	-10.75	-11	-11.5	-10.75	-11.5	-11.25	-11				34.48	-6.5	-6.25	-7	-6.5	-6.75	-6.25	-7.75	-6.25	-6.75
		34.52	-11	-11.25	-11	-11.5	-11.25	-11.25	-11.5	-11.25	-12				34.52	-6.75	-6.75	-6.75	-6.25	-6.75	-6.75	-7.5	-6.75	-7.25
		34.56	-11	-11.25	-11.5	-11.75	-11.25	-11.5	-12	-11.5	-11.75				34.56	-6.75	-6.75	-7.25	-6.75	-6.5	-7	-7	-6.75	-7
		34.6	-10.75	-11.25	-11.5	-10.75	-11.5	-11.25	-12	-11.25	-11.5				34.6	-6.5	-7	-6.75	-6.25	-7	-6.75	-6.75	-6	-7.25
		34.64	-10.5	-11	-10.75	-10.5	-12	-11.5	-12.25	-11	-11.75				34.64	-6.25	-7	-6	-6.5	-7.25	-7	-7	-6	-7.25
		34.68	-10.75	-10.25	-11.25	-10.5	-12.5	-11.5	-11.75	-11.25	-11.75				34.68	-6	-6.5	-6.25	-6.25	-7.75	-7.25	-6.75	-6.5	-7
		34.72	-10.75	-10.5	-11	-10.5	-12	-11	-11.25	-11	-11.75				34.72	-6.25	-6.5	-6.25	-6.25	-7.5	-7	-6.25	-6.5	-7
		34.76	-11	-11.25	-10.75	-10.5	-11.75	-10.75	-11	-11	-11.75				34.76	-6.25	-6.25	-6.5	-6.25	-6.75	-6.75	-6.5	-5.75	-7
		34.8	-11.25	-11.75	-11.25	-10.75	-11	-10.5	-10.5	-11	-11.75				34.8	-6.5	-6.25	-6.75	-6.25	-6.5	-6.25	-6.5	-6.5	-6.75
		34.84	-11.25	-11.5	-11.75	-11	-11	-11	-10.75	-11.75	-11.5				34.84	-6.75	-6	-7	-6.5	-6.75	-6.5	-6.75	-7.25	-6.5
		34.88	-10.75	-10.75	-11.75	-11.25	-10.75	-11.5	-11	-11.75	-11.5				34.88	-6.5	-6	-7	-6.75	-6.75	-7	-6.5	-7	-6
		34.92	-10.75	-10.75	-11.5	-11.25	-11	-11.5	-10.75	-11.25	-11.25				34.92	-6.25	-6.25	-7	-7.25	-7	-7	-6.5	-6.5	-5.75
		34.96	-10.5	-11	-11.25	-11.5	-11.25	-11.5	-10.75	-11.5	-11.5				34.96	-6	-6.75	-7.25	-7.25	-7.25	-6.75	-6.75	-6.25	-5.75
		35	-10.75	-11.5	-10.75	-11	-11	-11.25	-11	-11.75	-11.5				35	-6.75	-7.5	-7	-7	-7.25	-6.75	-6.5	-6.75	-6
		35.04	-10.75	-11.25	-11	-11	-11	-11.5	-11.75	-11.5	-11.5				35.04	-6.75	-6.75	-6.5	-6.75	-6.75	-7	-6.5	-7	-6.25
		35.08	-10.75	-11	-11.5	-11	-11.25	-12	-12.25	-12	-11.5				35.08	-6.75	-6.75	-6.25	-6.5	-6.75	-7.25	-7	-7.5	-6.25
		35.12	-10.5	-11.25	-11.75	-11	-11.5	-11.5	-11.5	-12	-11.75				35.12	-6.5	-6.75	-6.5	-6.5	-6.25	-6.75	-7	-7.25	-6.75
		35.16	-10.75	-11.25	-11.75	-11	-11.25	-11.5	-11	-11.25	-12.25				35.16	-6.75	-6.5	-6.5	-6.5	-6	-6.75	-6.5	-6.75	-7.5
		35.2	-11	-11.25	-12	-11.25	-11	-11.75	-10.5	-11.25	-12.25				35.2	-6.75	-6.5	-7	-7	-6.25	-7.25	-6.25	-6.25	-7.25
		35.24	-10.75	-11.25	-11.5	-11	-11	-11.5	-10.75	-11.25	-12.25				35.24	-6.25	-6.25	-6.75	-6.5	-6	-6.75	-6.75	-6.5	-7.75
		35.28	-11	-11.5	-11.25	-10.75	-11.25	-11.25	-11	-11	-12				35.28	-6.25	-6	-6.75	-6.5	-6	-6.25	-7	-6.5	-7.5
		35.32	-10.5	-11.5	-11	-10.75	-12	-11.5	-11.5	-11.25	-11.25				35.32	-5.75	-6.5	-7	-6.5	-6.75	-6.5	-7.25	-6.5	-6.75
		35.36	-10.5	-11.75	-11	-11.25	-11.5	-11.75	-11.75	-11.5	-11.75				35.36	-6	-7	-6.5	-6.75	-6.5	-7	-7.25	-6.25	-7
		35.4	-10.25	-11.5	-11	-11.5	-11.25	-11.75	-12.25	-11.25	-11.5				35.4	-6.25	-6.5	-6.25	-7.5	-6.75	-7	-7.75	-6.25	-6.5
		35.44	-10.5	-11.25	-10.75	-11.25	-11	-11.5	-12	-10.5	-11.75				35.44	-6.75	-6.25	-6.5	-7.25	-7.25	-6.75	-7.25	-6.25	-6.25
		35.48	-11	-10.75	-11	-10.75	-10.75	-11.25	-12	-10.25	-11.25				35.48	-6.5	-6	-6.25	-6.5	-7.5	-6.75	-6.75	-6.5	-6.25
		35.52	-11	-11	-10.5	-10.75	-11	-11.25	-11.75	-10.25	-11.5				35.52	-6.5	-6.5	-6	-6.5	-6.75	-6.75	-6.75	-6.5	-6.5
		35.56	-11	-11	-10.75	-10.75	-11	-11	-11.5	-11	-11.5				35.56	-6.25	-6.25	-6.5	-6.25	-6.25	-6.25	-6.5	-6.75	-6.75
		35.6	-11.75	-11.5	-11.25	-11.5	-11.25	-11.25	-11.25	-11.75	-11.5				35.6	-6.5	-6.75	-7	-6.5	-6	-6.5	-6.75	-6.75	-7
		35.64	-11.75	-11.25	-11.25	-12	-11.25	-11	-11.5	-12.25	-11				35.64	-7	-7	-7.25	-6.75	-6.75	-6.5	-7.25	-7	-6.75
		35.68	-11.25	-11.25	-10.75	-12	-11.5	-11	-11.75	-11.75	-11				35.68	-6.25	-6.75	-6.75	-7	-7.5	-6.75	-7.5	-7.75	-6.75
		35.72	-10.75	-11.25	-10.75	-11.75	-11.5	-11	-11.5	-11.5	-10.5				35.72	-6	-6.5	-6.5	-7.25	-7.25	-6.25	-7.25	-7.5	-6.25
		35.76	-11.25	-11.25	-11.75	-11.25	-11.25	-11.25	-11.25	-11.25	-11				35.76	-6.5	-7	-6.5	-7	-7	-6.25	-7	-6.75	-6.5
		35.8	-11	-11	-12	-11	-11	-11.25	-10.75	-11.25	-11.25				35.8	-6.5	-7	-7	-6.5	-6.75	-6.75	-6.5	-6.25	-6.75
		35.84	-10.75	-11	-11.75	-11	-11	-10.75	-10.75	-11	-11.25				35.84	-6.5	-7	-6.75	-6.25	-6.5	-6.5	-6.5	-5.75	-7
		35.88	-10.5	-10.75	-11.25	-11.25	-11	-10.75	-11.25	-11	-11.25				35.88	-6.75	-6.75	-7	-6.5	-6.25	-6.5	-7	-6	-6.75
		35.92	-10.5	-11.25	-11	-10.75	-11.25	-11	-11.5	-11.25	-11.5				35.92	-6.5	-6.75	-7	-6.5	-6.25	-6.5	-7.25	-6.5	-7
		35.96	-10.5	-11.25	-11.25	-11	-12	-11.5	-11.25	-11.5	-11.5				35.96	-6.75	-6.75	-7.25	-6.5	-6.75	-6.75	-6.75	-7	-7
		36	-10.75	-11	-11.25	-11.5	-11.75	-11.75	-10.75	-11.5	-12.25				36	-6.5	-6.25	-7.5	-6.75	-6.75	-6.75	-6.25	-7.25	-7.75
		36.04	-10.75	-10.75	-12	-11.75	-11.5	-11.75	-11.25	-11.75	-12.5				36.04	-6.25	-6.5	-7.25	-6.75	-6.75	-7	-6.5	-7.25	-7.5
		36.08	-10.5	-11	-11.75	-11.75	-11.75	-12	-11.75	-11.5	-11.75				36.08	-6	-6.75	-7	-6.5	-7	-7	-7	-6.5	-6.25
		36.12	-10.5	-11.25	-11.25	-10.75	-11.5	-12.25	-12.25	-11.25	-11.5				36.12	-6	-6.75	-6.75	-6.25	-6.75	-7.5	-7	-6.25	-6.5
		36.16	-10.5	-11.25	-10.25	-10.75	-11	-11.5	-12	-11	-11.75				36.16	-6	-6.75	-6	-6.5	-6	-7	-6.75	-6.5	-7
		36.2	-10.25	-11.75	-10.25	-11	-10.5	-11.25	-11.5	-11	-11.5				36.2	-5.75	-7	-6.25	-6.75	-6	-6.5	-7	-6.75	-6.75
		36.24	-10.25	-11.5	-10.75	-11.5	-10.5	-11	-11	-10.75	-11.5				36.24	-6.25	-6.75	-6.5	-7	-6.25	-6.25	-6.75	-6.5	-6.25
		36.28	-10.75	-11.5	-11.25	-11.5	-10.5	-11	-11	-10.5	-11.25				36.28	-6.5	-6.75	-6.75	-7	-6.25	-5.5	-6.75	-6.75	-6.25
		36.32	-11	-11.5	-11.75	-11.25	-10.75	-11.25	-11.75	-11	-11.25				36.32	-6.5	-6.5	-6.75	-7	-6.75	-5.5	-7.5	-7	-6.5
		36.36	-11.25	-11.75	-11.75	-11.5	-11.5	-11	-12	-11.75	-11.25				36.36	-6.75	-6.75	-7	-7	-7.25	-6.5	-7.5	-7	-6.5
		36.4	-10.75	-11.5	-11.25	-10.75	-11	-11	-11.5	-11.75	-11.75				36.4	-6.25	-6.5	-6.75	-6.5	-6.75	-6.75	-7	-6.75	-7
		36.44	-11	-11.25	-11.75	-10.75	-10.75	-10.75	-11	-11.25	-11.5				36.44	-6.5	-6.5	-7.25	-6.25	-6	-6.25	-6.5	-6.25	-7
		36.48	-11	-11	-11.5	-11	-10.5	-11.25	-11.25	-11	-11.25				36.48	-6.75	-6.25	-7	-6.75	-5.75	-6.25	-6.5	-6.5	-7
		36.52	-10.5	-11	-11	-11	-11.25	-11.5	-11.75	-11	-11				36.52	-6	-6.75	-6.5	-7	-6.5	-6.75	-6.5	-6.75	-7
		36.56	-10.5	-11	-11	-11.5	-11.75	-11.5	-11.75	-11.25	-11.5				36.56	-6.25	-6.75	-6.5	-7	-7	-7	-6.25	-6.75	-6.75
		36.6	-10.5	-11.25	-11.25	-11.5	-11.75	-11.75	-11.5	-11.25	-12.25				36.6	-6.5	-6.5	-6.75	-6.75	-7	-7	-6.5	-6.5	-7
		36.64	-10.5	-10.75	-11	-11.25	-11	-11.5	-11.5	-11.25	-12.25				36.64	-6	-6.25	-6.5	-6.5	-7	-6.5	-7	-6.25	-6.75
		36.68	-10.5	-11	-11	-11.5	-11	-11.75	-11.5	-11.75	-11.75				36.68	-6.25	-6.25	-6.25	-7	-7.25	-6.75	-6.75	-6.5	-6.25
		36.72	-10.5	-11	-11	-11.25	-11.25	-12	-11.25	-11.75	-11.75				36.72	-6	-6	-5.75	-6.5	-7	-7.25	-6.25	-6.5	-6.5
		36.76	-10.5	-10.75	-11	-11.5	-11.75	-11.5	-11.25	-11.75	-11.75				36.76	-6.25	-5.75	-6	-6.75	-7.25	-7	-6	-7	-6
		36.8	-10.75	-11	-11.5	-11.75	-11.75	-11.25	-11.75	-11	-11.75				36.8	-6.5	-6.25	-6.5	-6.5	-7	-6.75	-6.5	-6.75	-6.25
		36.84	-11	-11.25	-11.25	-11.75	-11.5	-11	-11.5	-11.5	-11.5				36.84	-6.25	-6.75	-6.5	-6.5	-6.5	-7	-6.5	-7	-6.25
		36.88	-11	-11.5	-11.25	-11.75	-11.5	-10.75	-11.5	-11.25	-11.25				36.88	-6.5	-6.75	-6.75	-7	-6.5	-6.75	-6.25	-6.75	-6.5
		36.92	-11	-11.25	-11	-11.25	-11.5	-11	-11.25	-11.25	-11.25				36.92	-6.5	-6	-6.5	-7.25	-6.75	-7.25	-6.25	-6.75	-6.75
		36.96	-11	-10.75	-11.25	-11.25	-11.25	-11.25	-11.5	-10.75	-11.25				36.96	-6.25	-5.75	-6.5	-7	-6.75	-7.5	-6.25	-6.5	-6.75
		37	-10.75	-11	-11	-10.75	-11.25	-11.5	-11.75	-10.25	-11.25				37	-6.5	-6	-6.25	-6.5	-6.75	-7	-6.5	-6.25	-6.5
		37.04	-10.25	-11.5	-10.75	-10.75	-11.75	-12	-11.75	-10	-11.5				37.04	-6	-6.75	-6.25	-6	-6.5	-6.5	-6.75	-6	-6.5
		37.08	-10	-11.75	-10.75	-11.25	-11.5	-11.75	-11.75	-11	-11.25				37.08	-6	-7.25	-6.5	-6.25	-6.25	-6.5	-6.5	-6.5	-6.25
		37.12	-10.5	-11.5	-10.75	-10.75	-11	-11.75	-11.75	-11.5	-11.25				37.12	-6	-7.5	-6.5	-6.25	-5.75	-7	-7	-7	-6.5
		37.16	-10.75	-11.25	-10.75	-10.5	-11	-11	-11.25	-11.25	-11.5				37.16	-5.75	-6.75	-6.5	-6.25	-5.75	-6.5	-6.75	-6.75	-6.75
		37.2	-11.5	-11.25	-11	-10.25	-10.75	-11	-10.75	-11	-11				37.2	-6.25	-6.5	-6.5	-6	-5.75	-6.75	-7	-6.5	-6.5
		37.24	-12	-11	-11	-11	-10.75	-11.5	-11	-11	-11				37.24	-7	-6.75	-6.75	-6.5	-6.25	-7	-7.25	-6.5	-6.5
		37.28	-11.5	-10.75	-10.75	-11.5	-10.25	-11.75	-11	-11.75	-11.5				37.28	-7	-6.5	-6.5	-6.75	-6	-6.5	-7.25	-7.25	-6.5
		37.32	-11.25	-10.75	-10.75	-11.25	-10.5	-11.5	-11.5	-11.75	-11.5				37.32	-6.75	-5.75	-6	-6.5	-6.25	-6.25	-7.25	-7.25	-6.5
		37.36	-10.75	-11	-11.5	-10.5	-10.75	-11.75	-11	-11.75	-11.25				37.36	-6.5	-5.75	-6.25	-6	-6.75	-7	-6.75	-7	-6.75
		37.4	-10.25	-11.25	-11.5	-10.75	-11.25	-11.5	-11	-11	-11				37.4	-6	-6.25	-6.5	-6	-7.25	-7	-7.25	-6.25	-6.5
		37.44	-10.25	-11.25	-11	-10.75	-11.75	-11	-11	-10.75	-10.75				37.44	-6	-6.5	-6.5	-6.5	-7.75	-6.75	-7	-6.25	-6.25
		37.48	-11	-10.75	-11	-11	-12.25	-10.75	-11	-10.75	-11				37.48	-6.5	-6	-6.25	-6.75	-7.5	-6.25	-7	-6	-6.5
		37.52	-11	-11.25	-11	-11	-12.25	-10.75	-11.75	-10.75	-11.5				37.52	-6.75	-6.75	-6.25	-6.5	-7.25	-6.5	-6.5	-6	-6.5
		37.56	-11	-11.25	-10.5	-11.5	-11.75	-11.25	-11.5	-11.5	-11.5				37.56	-7	-7	-6.25	-6.75	-6.75	-6.75	-6.25	-6.75	-6.25
		37.6	-10.5	-11	-10.25	-11.5	-11	-11.5	-11.25	-11.25	-11.5				37.6	-6.25	-6.75	-6.25	-6.5	-6.5	-6.75	-6	-6.75	-6.5
		37.64	-10.5	-11	-10.25	-11	-10.75	-11.25	-11.5	-11.5	-11.5				37.64	-6.25	-6.25	-5.75	-6.25	-6	-6.25	-6.25	-6.75	-6.75
		37.68	-11	-11.25	-10.25	-11	-10.5	-11.5	-11.5	-11	-11				37.68	-6.5	-6.75	-5.75	-6.75	-6	-6.5	-7	-7	-6.25
		37.72	-11	-11	-10.75	-11.5	-10.75	-11.25	-11.5	-11.25	-11.25				37.72	-6.75	-6.75	-6.25	-6.75	-6.5	-6.75	-7.25	-7	-7
		37.76	-10.5	-11.25	-11	-11.75	-11.25	-11.5	-11.75	-11.5	-12				37.76	-6.25	-7	-6.25	-6.75	-6.75	-7	-7.25	-6.5	-7.75
		37.8	-10.5	-11	-12	-11.75	-11.5	-11.75	-11.5	-11	-12.25				37.8	-6	-6.75	-6.75	-6.75	-7	-7.5	-6.75	-6	-7.75
		37.84	-10.25	-10.75	-12	-11.5	-11.25	-11.75	-11.5	-11.25	-12.25				37.84	-5.75	-6.5	-6.75	-6.75	-6.5	-7.5	-6.75	-6.5	-7.25
		37.88	-10.25	-10.75	-12	-11.5	-10.75	-11.25	-12	-11.5	-12.25				37.88	-6	-6.25	-7.25	-6.75	-6.5	-6.25	-6.75	-6.75	-6.75
		37.92	-10	-11.25	-11.25	-10.75	-10.75	-11.25	-12	-11.5	-12				37.92	-6	-6.5	-7	-6.5	-6.75	-6.25	-6.5	-7	-6.75
		37.96	-9.75	-11.25	-10.5	-10.75	-10.75	-10.75	-11	-11.75	-11.75				37.96	-6	-6.5	-6.25	-6.5	-7	-6	-6.25	-7.25	-7
		38	-10.5	-11	-11	-11	-11.25	-10.75	-10.75	-11.5	-11.5				38	-6	-6.5	-6.5	-6.5	-6.5	-6.25	-6.25	-7	-6.75
		38.04	-11	-11.25	-11	-10.5	-12	-10.75	-11.25	-11	-11.5				38.04	-6	-6.25	-6.5	-6	-6.5	-6.5	-6.75	-6.5	-6.75
		38.08	-10.5	-11.25	-11.25	-10.5	-11.5	-11.25	-11.5	-11	-11.75				38.08	-6.5	-6.25	-6.75	-6.25	-6.25	-6.75	-6.25	-6.5	-7
		38.12	-10	-11	-10.75	-10.75	-11.5	-11.75	-11.25	-11	-11.75				38.12	-6.25	-6.5	-6.5	-6.5	-6.5	-7.25	-6.5	-6.25	-6.5
		38.16	-9.75	-11	-10.25	-11	-11.5	-12	-11.25	-11	-11.75				38.16	-6	-6.5	-6	-6.75	-6.75	-7.75	-6.75	-6.75	-6.5
		38.2	-10.75	-11	-11.25	-11	-11.5	-12	-12.25	-11	-11.25				38.2	-6.75	-6.25	-6.75	-6.25	-6.75	-7.25	-7.75	-6.75	-6.75
		38.24	-11	-11.25	-10.75	-11.5	-11.5	-12	-12.25	-11.5	-11.25				38.24	-7	-6.25	-6.5	-6.75	-6.5	-7	-8	-6.75	-6.75
		38.28	-11	-11.75	-11	-11.75	-11.5	-12	-11.75	-12	-12				38.28	-6.75	-6.5	-6.5	-6.75	-6.75	-7	-7	-7	-7
		38.32	-10.75	-11.75	-11	-11.5	-11.25	-11.25	-11.5	-11.5	-11.75				38.32	-6.5	-6.75	-6.5	-6.25	-6.75	-6.5	-6.5	-6.5	-6.75
		38.36	-10.5	-11.25	-10.5	-11.25	-11.25	-11.5	-11.25	-10.5	-11.5				38.36	-6.25	-6.75	-6	-6.5	-6.5	-7	-6.75	-6	-6.25
		38.4	-10.75	-11.25	-10.25	-11.25	-11.25	-11.25	-11.75	-10.75	-11.75				38.4	-6.5	-6	-6	-6.25	-6.5	-6.75	-7	-6	-6.75
		38.44	-11	-11.75	-10.25	-11.25	-11.25	-11	-11.5	-11.25	-11.5				38.44	-6.5	-6.25	-5.5	-6.5	-6.5	-6.5	-6.5	-6	-7
		38.48	-11	-12	-11.25	-11.25	-11.25	-10.75	-11	-10.75	-11.25				38.48	-6.25	-7.25	-6.75	-6.75	-7	-6.75	-6.5	-5.75	-7
		38.52	-11.5	-11.75	-11.5	-10.75	-11.75	-11	-11	-10.5	-11				38.52	-6.5	-7	-6.75	-6.75	-7.5	-6.75	-6.5	-6.25	-6.75
		38.56	-11	-11.25	-12.25	-10.5	-11.5	-10.75	-10.75	-10.75	-11.25				38.56	-6.25	-6.75	-7	-6.75	-7.25	-6.5	-6.5	-6.5	-6.75
		38.6	-11	-10.5	-11.5	-10.25	-11.5	-10.25	-11	-11.5	-11.25				38.6	-6.25	-6.5	-6.75	-6.25	-7	-6.5	-6.25	-7	-6.25
		38.64	-10.75	-10	-11.25	-10.75	-11	-10.75	-11.25	-11.75	-11.5				38.64	-5.75	-6.25	-6.75	-6.5	-6.5	-6.75	-6.25	-7.25	-6.25
		38.68	-11.25	-10	-11.25	-11	-10.75	-11.25	-11.75	-11.5	-11				38.68	-6.25	-6	-7	-7	-6.25	-6.75	-6.5	-7	-6.5
		38.72	-11	-10.25	-10.75	-11.25	-10.75	-10.75	-11.5	-11.5	-11.5				38.72	-6.25	-6.25	-7	-7.25	-6.5	-6.25	-6.75	-7	-7
		38.76	-11	-10.5	-11	-11.25	-11	-10.75	-10.75	-11	-12.25				38.76	-6.5	-6.25	-7.5	-6.75	-6.75	-6	-6.75	-6.75	-7.25
		38.8	-10.25	-10.5	-10.75	-11	-11.25	-11	-10.5	-11.25	-12				38.8	-6.5	-6	-6.75	-5.5	-6.75	-6.5	-6.75	-6.75	-7
		38.84	-10	-10.5	-11	-11	-11.5	-12	-11.25	-11.75	-12				38.84	-6	-6.25	-6.5	-6.25	-6.75	-7	-6.5	-6.75	-7.25
		38.88	-10	-11	-10.5	-11.25	-11.25	-11.75	-11.5	-11.5	-11.75				38.88	-5.75	-6.5	-6.25	-6.75	-7	-6.75	-6.75	-7	-7
		38.92	-10.25	-10.75	-10.25	-11.5	-11	-12	-11.25	-11.5	-11.25				38.92	-6	-6.5	-6	-7	-6.75	-7.25	-6.75	-7	-6.75
		38.96	-10.5	-11.25	-10.75	-11	-11.25	-12	-11.25	-12	-11.5				38.96	-6.5	-6.75	-6.25	-6.75	-7	-7.75	-6.75	-7.25	-7
		39	-10.25	-11.25	-10.75	-10.5	-11.5	-11.75	-10.75	-11.75	-11.5				39	-6.5	-6.5	-6.25	-6.25	-7	-7.5	-7	-6.75	-7
		39.04	-10.75	-11.25	-11.25	-11	-11.5	-11.75	-11.25	-11.5	-11				39.04	-6.75	-6.5	-6.75	-6.5	-7.25	-7.25	-7.25	-6.75	-6.5
		39.08	-11.25	-11.25	-11.25	-11.25	-11.5	-11.25	-11.25	-11	-11				39.08	-7	-6.5	-7	-6.75	-7	-7	-7	-6.5	-6.75
		39.12	-11.5	-10.75	-11	-11.75	-11.25	-10.75	-11.25	-11	-11.5				39.12	-7	-6.25	-7	-7.5	-6.75	-6.5	-7.25	-6.5	-6.75
		39.16	-11.25	-11	-11	-11.5	-11	-10.25	-11.25	-11.5	-11.25				39.16	-6.5	-6.75	-6.75	-7	-6.5	-6	-7	-6.75	-6.5
		39.2	-10.5	-11.25	-11.25	-10.75	-11	-10.5	-11.5	-11	-11.75				39.2	-5.75	-7.25	-6.5	-6.5	-6.75	-6.25	-6.75	-6.25	-6.75
		39.24	-10	-11	-10.75	-10.75	-10.75	-11	-12	-10.75	-12				39.24	-5.75	-6.75	-6.25	-6.5	-6.5	-6.75	-6.75	-6	-6.75
		39.28	-10.5	-11	-11	-11	-10.5	-10.75	-11.75	-11	-12				39.28	-6.25	-6.75	-6.25	-6.5	-6.5	-6.5	-6.5	-6.25	-6.75
		39.32	-10.5	-10.5	-11.5	-11	-10.75	-11.25	-11.25	-11.5	-11				39.32	-6.25	-6.25	-6.75	-6	-6.75	-6.75	-6.25	-7	-6.5
		39.36	-11.5	-10.75	-11.5	-11.25	-11.25	-11.25	-10.5	-11.5	-10.25				39.36	-6.5	-6.5	-6.5	-5.75	-6.75	-7	-6	-7	-6
		39.4	-11.5	-11.25	-11	-10.75	-11.5	-11	-10.5	-11.25	-10.5				39.4	-6.75	-6.75	-6	-6.25	-7	-6.75	-6.25	-7	-5.75
		39.44	-11.25	-11.25	-10.75	-10.75	-11.5	-11	-10.75	-11.5	-11.5				39.44	-7	-6.5	-6	-6.75	-7	-6.75	-6.75	-7.25	-6.5
		39.48	-10.75	-11.5	-10.25	-10.5	-11.25	-11.25	-11.5	-11	-11.75				39.48	-6.75	-6.75	-6.25	-7	-6.5	-6.5	-7	-6.75	-7
		39.52	-10.75	-11	-10	-10.75	-11.25	-11	-11.25	-10.75	-11.25				39.52	-6.5	-7	-6.5	-6.75	-6	-6.5	-7	-6.75	-6.75
		39.56	-10.75	-10.5	-10.5	-10.75	-11.5	-11	-11.75	-10.75	-11				39.56	-6.25	-6.5	-6.75	-7	-6.75	-6.5	-6.75	-6.5	-6.25
		39.6	-10.25	-10	-11.25	-11	-11	-11.25	-11	-11	-11				39.6	-6	-6	-6.75	-6.75	-6.75	-6.5	-6.5	-6.25	-6.25
		39.64	-10.5	-10	-11.25	-11	-11	-10.75	-11	-11.5	-11.5				39.64	-6.25	-6	-6.25	-7	-7	-6.25	-6.75	-6.75	-6.5
		39.68	-10.75	-10.5	-11.25	-11.25	-11	-10.75	-11	-11.75	-11.5				39.68	-6.5	-6.5	-6	-7	-6.5	-6.75	-6.75	-7	-6.75
		39.72	-10.5	-10.75	-11.5	-11	-11.5	-10.75	-10.75	-11	-12				39.72	-6.25	-6.75	-6.75	-7	-7	-7	-6.5	-6.5	-7
		39.76	-10.5	-11	-12.25	-11	-11.25	-11.25	-11	-11	-11.75				39.76	-6.5	-6.75	-7.5	-6.75	-7	-6.75	-6.75	-6.5	-7.25
		39.8	-10.75	-11.25	-11.25	-11	-11	-11	-11.25	-11.25	-11.25				39.8	-6.5	-6.25	-7	-6.5	-6.5	-6.5	-7.25	-6.75	-7
		39.84	-10.5	-10.75	-10.75	-11	-11	-10.75	-11.5	-11.25	-11				39.84	-6.5	-6.25	-6.75	-6.5	-6.75	-6.25	-7.25	-7	-7
		39.88	-10.5	-11	-10.75	-11.5	-11.25	-11	-11.5	-11.25	-10.75				39.88	-6.5	-6.75	-6.5	-6.5	-6.5	-6	-6.75	-6.5	-6.75
		39.92	-11.25	-11	-10.75	-11	-11	-10.5	-11.75	-11.5	-11				39.92	-6.5	-6.5	-6.25	-6.25	-6.25	-6	-6.75	-7	-6.25
		39.96	-11.75	-11	-11	-11	-11	-10.25	-11.75	-12	-11.25				39.96	-6.25	-7	-6.5	-6.5	-6.25	-6.25	-6.75	-7.25	-6.75
		40	-12	-11.25	-10.75	-10.75	-10.75	-10.75	-11.75	-12	-12				40	-6.5	-7	-6.5	-6.5	-6.5	-6.75	-6.75	-7.25	-7
		40.04	-11.5	-11	-11	-10.5	-10.75	-11.75	-11.75	-11.75	-11.5				40.04	-6.75	-6.5	-6.75	-6.25	-6.5	-7.25	-7	-7.25	-7
		40.08	-10.5	-10.75	-10.75	-10.75	-11	-11.5	-11.75	-11.5	-11				40.08	-7	-6.75	-7.25	-6.5	-6.5	-7	-7	-7	-6.75
		40.12	-9.75	-10.25	-10.75	-11.25	-11.5	-11	-11.75	-11.25	-11.25				40.12	-6.75	-6	-7	-7.25	-6.75	-6.5	-6.5	-6.75	-6.75
		40.16	-10.5	-10.75	-11	-11.5	-11.75	-11.5	-11.75	-11.25	-11.25				40.16	-7	-6.25	-7	-7.25	-6.75	-6.75	-6.5	-6.5	-6.5
		40.2	-10.5	-10.75	-11	-11.25	-11.5	-11.25	-11.25	-10.75	-12				40.2	-6.75	-6.25	-6.75	-6.75	-6.75	-7	-6.75	-6.25	-6.75
		40.24	-10	-11	-10.5	-10.75	-11	-11.5	-11.5	-10.5	-11.75				40.24	-6	-6	-6.75	-6	-5.75	-7	-6.75	-6.5	-7
		40.28	-10.5	-11.25	-10.5	-10.5	-11	-12	-11.5	-10.75	-11.75				40.28	-6.25	-6.5	-6.5	-6.5	-5.75	-7	-6.25	-6.5	-7
		40.32	-10.75	-11.25	-10.75	-10.25	-11.25	-11.5	-11.25	-11	-11.25				40.32	-6.5	-6.5	-6	-6.75	-6.25	-6.75	-6.5	-6.75	-6.75
		40.36	-10.75	-11.5	-11	-10.25	-11.25	-10.75	-11.5	-11	-11.5				40.36	-6.75	-6.75	-6.25	-6.25	-6.5	-6.25	-7	-6.75	-6.75
		40.4	-11	-11.25	-11.25	-10.5	-11.25	-10.75	-11.75	-11.5	-12				40.4	-6.75	-6.75	-7.25	-6.25	-7	-6.25	-7	-6.75	-7.25
		40.44	-11.5	-11.25	-11.5	-11	-11.25	-10.75	-11.75	-10.5	-11.75				40.44	-7.25	-7	-7.5	-7	-6.5	-6.5	-6.75	-6	-7.25
		40.48	-11.25	-11.25	-11	-10.75	-11.25	-11	-11.5	-10.75	-11.25				40.48	-6.5	-6.75	-6.75	-6.75	-6.75	-6.5	-7	-6	-6.5
		40.52	-11	-11	-11.5	-10.5	-11.5	-11.5	-11.25	-10.75	-11				40.52	-6	-6.75	-6.5	-6.25	-7	-7	-7	-6.25	-5.75
		40.56	-10.75	-10.75	-11	-11.25	-10.75	-11	-10.75	-11.25	-11				40.56	-6	-6.5	-6.25	-6.5	-6.75	-6.25	-6.75	-6.5	-6.75
		40.6	-11.25	-10.75	-11	-11.25	-10.75	-11	-11.25	-11.75	-11.75				40.6	-6.25	-6	-6.75	-7	-6.75	-6.25	-6.5	-7	-7.25
		40.64	-11	-11.25	-10.75	-10.75	-10.75	-11.25	-10.75	-11.75	-11.75				40.64	-6.25	-6.25	-6.5	-6.75	-6.75	-6.75	-6.25	-6.75	-7
		40.68	-10	-11.5	-10.5	-10.5	-11	-11.25	-10.25	-11.5	-11.75				40.68	-6	-6.75	-6.25	-6.5	-7	-7	-6.75	-7	-7
		40.72	-10.5	-11.25	-10.75	-10.75	-11.25	-11.5	-10.5	-11.25	-11.25				40.72	-6.5	-7	-6.75	-6.75	-6.75	-7.25	-6.75	-6.75	-6.75
		40.76	-11	-10.75	-10.75	-11	-11.5	-11.5	-10.25	-11.25	-11.25				40.76	-6.5	-6.5	-6.5	-6.75	-7	-6.5	-6	-6.25	-7
		40.8	-10.5	-10.75	-11	-11	-11.25	-11.5	-11	-11.5	-11.5				40.8	-6	-6.25	-6.75	-6.5	-6.75	-6.25	-6.25	-6.75	-7.25
		40.84	-10	-10	-10.25	-11.25	-11.25	-11.5	-11.25	-11.75	-11.75				40.84	-6.25	-6	-6.75	-7	-6.5	-6.75	-6.25	-7.25	-7.75
		40.88	-9.75	-10.5	-10.25	-11.25	-11.5	-11	-11.25	-11.5	-11.5				40.88	-6.25	-6.5	-6.75	-7	-6.5	-7	-6.5	-7	-7.5
		40.92	-10.25	-10.5	-10.75	-11.25	-11	-10.5	-11.5	-11.75	-11.25				40.92	-6.25	-6.75	-6.75	-6.75	-6.5	-6.75	-6.75	-6.75	-7.25
		40.96	-10.25	-10.5	-11	-11.25	-10.75	-10.75	-11.75	-11.25	-11.5				40.96	-6	-6.75	-6.5	-7	-6.5	-6.5	-6.5	-6.25	-7
		41	-10.25	-10.75	-10.75	-10.75	-11	-11	-11.5	-10.75	-11.25				41	-6.25	-7.25	-6.25	-6.75	-6.25	-7	-6.75	-6.25	-6.25
		41.04	-10.25	-11	-10.75	-10.5	-11.5	-10.75	-11.25	-11	-11.25				41.04	-6.75	-7	-6.25	-6.25	-6.75	-7	-7	-6.75	-6.5
		41.08	-10.75	-11.25	-11.25	-10.5	-11.5	-10.5	-11.5	-11.25	-11				41.08	-7	-7.25	-6.75	-6.25	-7.25	-6.5	-7	-7	-6.5
		41.12	-10.75	-10.75	-10.75	-10.75	-11.5	-11.25	-11	-11	-11.5				41.12	-6.5	-7	-7	-6.75	-7.25	-6.5	-6.75	-6.75	-6.75
		41.16	-10.75	-10.5	-10.5	-10.75	-11.25	-11.5	-10.75	-11	-11.75				41.16	-6.75	-6.5	-6.75	-6.5	-6.75	-6.75	-6.5	-6.75	-6.5
		41.2	-10.75	-10.25	-10.5	-11	-11.5	-11.25	-10.5	-11.25	-11.5				41.2	-7	-6	-6.5	-6.75	-6.75	-6.75	-6.75	-6.75	-6.5
		41.24	-11	-10.75	-11.25	-11	-11.25	-10.5	-10.5	-11.25	-11.5				41.24	-6.5	-6	-6.5	-6.5	-6.25	-6.75	-6.75	-6.75	-6.25
		41.28	-11	-11	-11.25	-11	-11.25	-10	-10.75	-11.75	-11				41.28	-6.5	-6	-6.75	-5.75	-6.5	-6.25	-6.5	-7	-6
		41.32	-10.75	-11	-11	-11	-11.5	-11	-11.25	-11.5	-10.75				41.32	-6.5	-6.5	-7	-6	-7	-6.5	-7	-6.75	-6.5
		41.36	-10.5	-11	-11	-10.75	-11.75	-11	-11.75	-11.25	-11				41.36	-6.5	-6.5	-7	-6.25	-7.25	-6.5	-7	-6.5	-7
		41.4	-10.25	-11	-11	-10.75	-12	-11.75	-12.25	-11	-11.25				41.4	-6.75	-6.5	-6.25	-6.5	-6.75	-6.75	-7.25	-6.25	-7
		41.44	-10	-10.5	-10.75	-10.75	-11.75	-11.5	-12	-11.5	-11.25				41.44	-6.25	-5.5	-6.25	-6.75	-6.5	-6.5	-7.25	-6.5	-7.25
		41.48	-9.75	-10.5	-10.5	-10.5	-11.5	-11.25	-11.5	-11	-11.25				41.48	-6	-5.5	-6.25	-6.5	-7	-6.5	-6.75	-6.75	-7
		41.52	-9.25	-10	-11	-10.75	-11	-11.25	-11.25	-10.5	-11.75				41.52	-5.75	-5.75	-6.5	-6.25	-6.5	-7	-6.75	-6.5	-6.5
		41.56	-10.25	-10.5	-11	-11.25	-10.5	-11.75	-10.75	-10.5	-11.75				41.56	-6.25	-6	-6.75	-6.25	-6.5	-7	-6.5	-6.5	-6.25
		41.6	-10.75	-10.75	-10.75	-10.5	-10.5	-11.25	-10.75	-11	-10.75				41.6	-6.5	-6.25	-6.25	-6.25	-6.25	-6.5	-6.25	-6.75	-6
		41.64	-11	-10.75	-11	-10	-10.75	-11	-11	-11.5	-10.75				41.64	-6.75	-6.5	-6.25	-7	-6.5	-6.5	-6.5	-7.25	-6.25
		41.68	-11	-11	-10.75	-10	-10.75	-10.75	-10.75	-11.25	-10.75				41.68	-6.5	-6.5	-5.75	-6.75	-6.25	-6.5	-6.75	-7	-6.25
		41.72	-11	-11.5	-11	-10	-10.75	-11	-10.75	-11	-11.25				41.72	-6.75	-6.75	-6.5	-6.25	-6.5	-6.75	-7	-7	-6.5
		41.76	-11	-11.75	-11.5	-10.5	-10.25	-11.5	-11	-10.5	-11.75				41.76	-6.75	-7.25	-7.25	-6	-6	-6.75	-7.25	-6.5	-7
		41.8	-11	-11.5	-11.25	-10.75	-10.5	-11.5	-10.75	-10.5	-11.25				41.8	-6.75	-7.5	-7	-6.5	-5.75	-6.25	-6.5	-6.25	-6.75
		41.84	-10.25	-11.25	-11	-10.75	-11	-10.75	-10.25	-11.25	-11.5				41.84	-6	-6.75	-6.5	-7.25	-5.75	-6.25	-5.75	-6.5	-6.5
		41.88	-9.5	-10.5	-11	-11.25	-11	-10.5	-11	-11.25	-11.25				41.88	-5.5	-6.5	-6.5	-7	-6	-6.25	-6.25	-6	-6.75
		41.92	-10	-11	-10.75	-11.5	-11.25	-10.5	-11.5	-11	-11				41.92	-6.5	-6.75	-7	-6.5	-6	-6	-6.75	-6	-6.75
		41.96	-11	-11.5	-10.75	-11.75	-11.25	-11.25	-11.25	-11	-11.5				41.96	-7.5	-6.75	-7	-6.75	-6.25	-6.75	-6.5	-6.25	-6.75
		42	-11.25	-11.5	-10.75	-11.25	-10.5	-11.5	-11.5	-11.25	-11.75				42	-7.25	-6.75	-6.75	-6.5	-6.25	-7	-6.75	-7	-7
		42.04	-11.25	-11	-10.5	-10.75	-10.75	-11	-10.75	-11.5	-11.5				42.04	-6.25	-6.25	-6.5	-6.5	-6.5	-6.75	-6	-6.75	-6.75
		42.08	-11.25	-10.75	-10.5	-10	-11	-10.25	-10.75	-11.5	-11.5				42.08	-6.25	-6.75	-6.25	-6.25	-6.5	-6.25	-6	-7	-6.75
		42.12	-10.75	-10.5	-10.5	-10	-11.25	-10.75	-10.75	-10.75	-11.5				42.12	-6.25	-6	-6.5	-6	-6.5	-6.25	-6.25	-6.75	-7
		42.16	-10	-10.5	-10.75	-10.75	-11	-11	-11	-11.25	-11.5				42.16	-5.5	-5.75	-6.75	-5.75	-6.75	-6.75	-6.75	-6.75	-7
		42.2	-10	-10.75	-10.5	-11	-11.25	-11.5	-11	-11	-10.75				42.2	-5.5	-6.25	-6.5	-6	-6.5	-6.75	-6.5	-6.5	-6.75
		42.24	-10.5	-10.75	-10.5	-10.75	-11.75	-11.5	-11	-11.5	-10.75				42.24	-5.75	-6.5	-6	-6.5	-6.5	-6.5	-7	-7.25	-6.5
		42.28	-11	-10.75	-10.5	-10.75	-11.5	-11.25	-11.25	-11.75	-11				42.28	-6	-6.25	-6.25	-6.5	-6.75	-6.75	-7	-7	-6.5
		42.32	-11	-10.5	-10.75	-10.5	-11	-11	-11.25	-11.25	-11.25				42.32	-6	-6	-6.5	-6.5	-6.75	-7	-6.5	-7	-6.5
		42.36	-10.75	-11	-11.25	-10.5	-11.25	-11.25	-11.25	-10.5	-11.25				42.36	-5.75	-6.5	-6.75	-6	-6.5	-7	-6.25	-6.5	-6.25
		42.4	-11.25	-11.25	-11.25	-11	-11.25	-11.25	-11	-10.75	-11.25				42.4	-6.25	-6.5	-7	-6.25	-6.5	-6.75	-6.25	-6	-6.25
		42.44	-11	-11	-11	-11.25	-11	-10.75	-11	-11.5	-11.25				42.44	-7	-6.25	-6.25	-6.5	-6.5	-6.25	-6	-6.25	-6
		42.48	-11	-11	-10.75	-11	-11	-10.25	-11.25	-11.5	-11.5				42.48	-7	-6.25	-6	-6.25	-6.5	-6	-7	-6.5	-6.5
		42.52	-10.5	-11.25	-10	-11.25	-11	-10.5	-11.25	-11.25	-11.5				42.52	-6.25	-6.75	-5	-6.5	-6.5	-5.75	-7	-6.75	-6.75
		42.56	-10	-11.25	-10.25	-10.75	-10.75	-10.75	-11	-10.75	-11				42.56	-6	-6.5	-5.75	-6	-6.5	-6.25	-6.75	-6.75	-6.5
		42.6	-9.75	-11	-10.5	-10.75	-10.25	-10.75	-10.75	-10.75	-11.25				42.6	-5.5	-6.5	-6.25	-6.25	-6	-6.25	-6.75	-6.75	-6.5
		42.64	-10.5	-10.5	-11	-10.5	-10.5	-10.5	-11.25	-10.5	-11.25				42.64	-6.25	-6.25	-6.5	-6.75	-6.5	-6.25	-6.75	-6.5	-6.25
		42.68	-10.5	-10.5	-10.75	-9.75	-11.25	-10.5	-11	-10.75	-11.25				42.68	-6.5	-6.25	-6	-6.25	-7.25	-6.5	-6.5	-6.5	-6.5
		42.72	-10.5	-10.75	-10.75	-9.75	-11.25	-10.5	-10.5	-11	-11.25				42.72	-6.5	-6.25	-6	-6	-7.5	-7	-6.75	-6.75	-6.75
		42.76	-10.5	-10.75	-10.5	-10.25	-11	-10.75	-11.25	-11.25	-11.5				42.76	-6.5	-6.25	-5.5	-6.25	-7.25	-7.25	-6.75	-7	-7
		42.8	-10.25	-11	-10.75	-10.75	-10.75	-10.5	-11.75	-11	-11.5				42.8	-6	-6.25	-6	-6.25	-6.5	-6.25	-7	-6.75	-7
		42.84	-10.25	-11	-11.25	-11	-11	-10.5	-11.75	-10.75	-11.25				42.84	-6.25	-6.25	-6.75	-6.5	-6.75	-6	-7.25	-6.5	-6.75
		42.88	-10.25	-11	-11.25	-11.25	-10.75	-10.75	-11.25	-11	-11				42.88	-6.25	-6.5	-6.5	-6.75	-6.5	-6.25	-6.75	-6.25	-6.75
		42.92	-10.25	-11	-11.25	-11.25	-10.5	-11.25	-11.5	-11.75	-11.25				42.92	-6.25	-6.25	-6.25	-6.75	-6.5	-7	-6.75	-6.75	-6.75
		42.96	-10.75	-11	-11	-10.75	-11	-10.75	-11.5	-11.75	-11.5				42.96	-6.5	-6.25	-6.25	-6.25	-6.75	-6.75	-6.5	-6.75	-6.5
		43	-10.75	-10.5	-11	-10.5	-11.25	-10.75	-11.5	-11.5	-12				43	-6.25	-6	-6.5	-6.25	-6.75	-6.25	-6.25	-6.5	-6.75
		43.04	-10.5	-10.75	-11.25	-10.25	-11.25	-10.75	-10.75	-11	-11.75				43.04	-6	-6.25	-6.75	-6.25	-7	-6.25	-6.5	-6.25	-7.25
		43.08	-10.25	-11.5	-11	-9.75	-10.75	-10.75	-10.5	-10.5	-10.75				43.08	-6	-6.75	-6.75	-6	-6.5	-6.5	-6.5	-6.5	-7
		43.12	-10.5	-11.5	-11.25	-10	-11.25	-11	-10.75	-10.5	-10.75				43.12	-6	-7	-6.5	-6	-6.5	-6.75	-6.25	-6.5	-6.75
		43.16	-10.25	-11	-11	-10.75	-11.75	-11	-10.75	-11.25	-11.5				43.16	-6.25	-6.5	-6.75	-6	-6.75	-6.75	-6.5	-6.75	-7
		43.2	-10.25	-10.5	-11	-11	-11.75	-11	-11	-11.25	-11.25				43.2	-6.5	-6.75	-6.25	-6	-6.25	-6.25	-6	-6.75	-7
		43.24	-10.5	-10	-11.25	-10.75	-11.5	-11.25	-11	-11	-11				43.24	-6.25	-6.25	-6.5	-6	-6.25	-6.5	-5.75	-6.75	-6.75
		43.28	-10.25	-10.25	-11.25	-11	-10.75	-11.25	-11.25	-11	-11				43.28	-6	-6	-6.5	-6.5	-6.25	-7	-6.5	-6.75	-6.75
		43.32	-10.25	-10.25	-10.75	-11	-11	-11.5	-11.5	-11	-11.5				43.32	-5.75	-6	-6.5	-6.25	-6.5	-7	-7.25	-7	-6.75
		43.36	-10.5	-10.5	-11	-11	-11.5	-11.25	-11	-10.75	-11.75				43.36	-6	-6.25	-7	-6.25	-6.5	-6.25	-7	-6.5	-6.5
		43.4	-10.5	-10.75	-10.75	-11	-11.25	-11.25	-11	-10.5	-11.25				43.4	-6	-6.5	-6.75	-6.5	-6.25	-6.5	-6.75	-6.25	-6.75
		43.44	-10.25	-11	-10.5	-11	-11.25	-10.5	-11	-10.75	-11.5				43.44	-6.25	-6.75	-6.25	-6.5	-6.5	-6.25	-6.75	-6.25	-7
		43.48	-10.25	-11	-10.25	-11	-11.25	-10.5	-11.5	-10.75	-11.5				43.48	-6.5	-7	-6	-6.25	-7.25	-5.75	-7	-6.25	-7.25
		43.52	-10.25	-10.5	-10	-11	-10.75	-11.25	-11.25	-11	-11.25				43.52	-6	-6.25	-6.25	-6	-6.75	-6.25	-6.75	-6.25	-7.25
		43.56	-10.75	-10.5	-10.25	-11	-11.25	-11.25	-11	-10.75	-11				43.56	-5.75	-5.5	-6.25	-6	-6.75	-6.25	-6.5	-6.5	-7
		43.6	-11.25	-10.75	-10	-10.75	-11.5	-10.5	-10.75	-11	-10.5				43.6	-6.25	-5.75	-6	-6	-6.25	-6	-6.75	-6.5	-6.5
		43.64	-11	-10.5	-10.25	-10.5	-12	-10.25	-10.75	-11.5	-10.25				43.64	-6.25	-6	-6.25	-6.5	-6.25	-6.25	-7	-6.25	-6
		43.68	-10.75	-10.25	-10.25	-10.75	-11.25	-11.5	-10.75	-12	-10.5				43.68	-6.5	-6.25	-6	-6.75	-6.5	-6.5	-6.5	-6.5	-5.75
		43.72	-10.75	-10.75	-10.75	-11	-11	-11.75	-11	-11.75	-10.75				43.72	-6.5	-6.25	-6.25	-6.75	-6.25	-6.5	-6.25	-7.25	-5.75
		43.76	-11	-11.25	-10.5	-10.75	-10.75	-11.75	-11.5	-10.5	-11.25				43.76	-6.5	-6.25	-6.25	-6.5	-6.5	-6.5	-7	-6.75	-6.25
		43.8	-10.75	-11.25	-10.5	-11	-11.25	-11.25	-11.25	-10	-11.25				43.8	-6.25	-6.5	-6.5	-6.5	-7	-6	-6.75	-6.5	-6.25
		43.84	-10.5	-10.75	-10.75	-10.75	-11.25	-10.75	-11	-10.75	-11.5				43.84	-6	-6.75	-7	-6.25	-7	-6.25	-6.75	-6.5	-6.25
		43.88	-10.5	-10.25	-11.25	-10.25	-11	-10.75	-11	-11.25	-11.75				43.88	-6.25	-6.25	-7.5	-6	-6.5	-6.5	-6.75	-6.75	-7
		43.92	-10.75	-10.25	-11.75	-10.25	-11.25	-10.75	-11.5	-11.5	-11.5				43.92	-6.5	-6	-6.5	-6	-6.5	-6.75	-6.75	-6.75	-7.25
		43.96	-10.5	-10.25	-11.75	-10	-10.75	-10.5	-11.25	-11.25	-11.25				43.96	-6	-5.75	-6.25	-5.75	-6.25	-6.5	-6.5	-7	-6.75
		44	-10.75	-10.75	-11.5	-10	-10.75	-10.5	-11.75	-11	-11				44	-6	-6	-6.5	-6.25	-6.25	-6.5	-7	-7.25	-6.5
		44.04	-10.25	-10.75	-11.25	-10	-10.75	-11	-11.75	-10.75	-11				44.04	-6	-6.5	-6.5	-6.5	-6.25	-6.25	-6.75	-6.75	-6.75
		44.08	-10	-10.5	-11	-10.5	-10.75	-11.5	-11.5	-11	-11.25				44.08	-6.5	-6.25	-7	-7	-6.75	-6.5	-6.5	-6.75	-6.75
		44.12	-10	-10.75	-10.5	-10.5	-11	-11.75	-11	-11	-11.5				44.12	-6.5	-6.5	-6.25	-6.5	-7	-6.75	-6.75	-6.5	-6.75
		44.16	-10.25	-11.25	-10.25	-10.25	-11.25	-11.5	-11	-11	-11				44.16	-6.5	-7.25	-6	-6	-6.75	-6.5	-6.5	-6.75	-6.5
		44.2	-10.5	-11.25	-10.5	-10.75	-11.25	-11.25	-10.75	-11.25	-11.5				44.2	-6.75	-7.25	-6	-5.75	-6.5	-6.5	-6.75	-6.75	-7
		44.24	-10.5	-11.75	-11	-10.5	-11.25	-11	-10.75	-11.5	-11.5				44.24	-6.5	-7.5	-6.75	-5.25	-6.25	-6.25	-6.5	-7	-6.75
		44.28	-10.25	-11.25	-11.5	-11.25	-11	-10.75	-10.75	-11.75	-11.5				44.28	-6.25	-7	-7	-6.25	-6.5	-6.25	-6.25	-7.25	-6.75
		44.32	-10.25	-11	-11.5	-11.25	-10.75	-10.5	-11	-11.75	-11.5				44.32	-6.25	-6.25	-7	-6.75	-6.5	-6	-6.75	-7.25	-6.75
		44.36	-10.25	-10.75	-11	-10.75	-11	-11	-10.75	-11.5	-11.75				44.36	-6	-5.75	-6.75	-6.5	-6.25	-6.25	-6.5	-7.25	-6.75
		44.4	-10.75	-10.5	-10.5	-10.75	-11.5	-11.25	-11	-11	-11				44.4	-6.5	-6	-6.75	-6.75	-6.75	-6.75	-6.75	-6.5	-6.75
		44.44	-11	-10.25	-10.5	-11.25	-11.25	-11.25	-11.5	-10.5	-10.75				44.44	-6.75	-6	-6.75	-6.5	-6.75	-6.75	-6.75	-6	-6.25
		44.48	-10.5	-10.5	-10.25	-11	-11.5	-11	-11	-10.75	-11				44.48	-6.25	-6.25	-6.25	-6.5	-7.25	-7	-6.25	-6.5	-6.25
		44.52	-10.25	-10.5	-9.75	-11	-10.75	-11.25	-10.75	-10.5	-11.25				44.52	-5.75	-6.25	-5.75	-6.5	-7	-7	-6	-6.5	-6.25
		44.56	-10	-10.75	-9.75	-11.25	-10.5	-11.25	-10.75	-10	-11.25				44.56	-6	-6.75	-5.75	-6.25	-6.75	-6.75	-6	-5.75	-6.25
		44.6	-10	-10.5	-10	-11	-11	-10.75	-11.25	-10.5	-11				44.6	-6.25	-6.75	-6	-6	-7	-6.75	-6.25	-5.75	-6.5
		44.64	-9.75	-10.25	-10.5	-11.25	-11.25	-10.75	-11	-11	-10.5				44.64	-6.5	-6.5	-6.5	-6.5	-7	-7	-6.25	-6.75	-6.5
		44.68	-10.5	-10	-11	-11.5	-11.25	-11	-11.25	-11.25	-10.5				44.68	-6.5	-6.25	-6.75	-7	-6.75	-6.5	-6.75	-7.25	-7
		44.72	-10.75	-10.75	-11.25	-10.75	-11.5	-11.25	-11.75	-11	-10.75				44.72	-6.5	-6	-7	-7	-6.75	-6.5	-7.5	-6.75	-7
		44.76	-10.75	-11.25	-11.5	-10	-11.25	-11.25	-11.5	-11	-11.25				44.76	-6.5	-6.25	-7	-6.25	-6.5	-6.75	-7.5	-6.25	-7
		44.8	-10.5	-11	-11	-9.5	-11.25	-10.75	-11.5	-11.5	-11.75				44.8	-6.25	-6.75	-6.5	-5.75	-6.25	-6.5	-7.5	-6.25	-7
		44.84	-10.25	-11.25	-10.75	-9.75	-11.25	-10.25	-11.75	-10.75	-11.5				44.84	-6.25	-7	-6.5	-5.75	-6.5	-6	-6.75	-5.75	-6.5
		44.88	-9.75	-11	-11.25	-10	-11	-10.25	-11.5	-10.5	-11.5				44.88	-5.75	-6.5	-7	-6.25	-6.25	-6.25	-6.25	-6	-6.25
		44.92	-10.25	-10.75	-10.75	-10	-11.25	-10.5	-11.25	-10.5	-11.25				44.92	-5.5	-6.25	-7	-6.5	-6.5	-6.5	-6	-6.25	-6.75
		44.96	-10.75	-10	-10	-10.75	-11.25	-10.5	-11	-11	-11				44.96	-5.75	-5.5	-6.5	-6.5	-6.5	-6.5	-6.75	-6.75	-6.75
		45	-10.75	-9.75	-10.25	-11	-10.75	-10.5	-10.75	-11.25	-11.25				45	-6.25	-5.75	-6.5	-6.5	-6.25	-6.5	-6.5	-7	-6.75
		45.04	-10.25	-10.5	-10.25	-11.25	-10.75	-10.5	-10.5	-11.25	-11.25				45.04	-6.25	-6	-6.25	-6.5	-6.25	-6	-6.5	-6.75	-6.25
		45.08	-10.5	-11	-11	-11	-11	-11.25	-10.5	-11	-11.75				45.08	-6.75	-6.5	-6.75	-6.5	-6.25	-6.25	-6.5	-6.5	-6.75
		45.12	-10.5	-11.5	-11.25	-11.5	-10.75	-11	-11	-10.75	-12				45.12	-7	-7.5	-6.5	-7.5	-6.25	-6.75	-6.75	-6.25	-6.5
		45.16	-10.5	-11.25	-11	-11.25	-11	-11	-11.25	-10.75	-12				45.16	-6.75	-7.25	-6	-7.5	-6.25	-6.75	-7.25	-6.25	-6.75
		45.2	-10.75	-11.5	-10.5	-10.75	-11.25	-11.25	-11.5	-11	-11.5				45.2	-6.75	-7.25	-5.25	-6.75	-6.5	-6.75	-7.25	-6.75	-6.75
		45.24	-11	-11.5	-10.25	-11	-11	-11	-11.5	-11.25	-11				45.24	-6.5	-6.75	-5.5	-6	-6.75	-6.5	-7	-7.25	-6.25
		45.28	-10.5	-11	-10.75	-11	-11	-11.25	-11.5	-11.5	-11				45.28	-6.5	-6	-6.5	-5.75	-6.5	-6.5	-7.25	-7	-6.25
		45.32	-10	-10.75	-11.25	-10.5	-11	-11.75	-11.25	-11.25	-11				45.32	-6.5	-6.25	-7	-6	-6.5	-7	-7.25	-7	-6
		45.36	-10	-10.75	-11	-11	-10.75	-11.5	-11	-11	-11				45.36	-6.5	-5.75	-6.5	-6.25	-6.25	-7	-7.25	-6.5	-6.25
		45.4	-10.25	-10.5	-11	-11.25	-11	-11.75	-10.75	-10.75	-10.75				45.4	-6.75	-5.5	-6.75	-6.75	-6	-7.75	-7.25	-6.5	-6.5
		45.44	-10.5	-10.5	-11.5	-10.75	-11	-11.75	-10.5	-10.75	-11				45.44	-6.75	-5.25	-7	-6.5	-6	-7.75	-6.5	-6.75	-6.5
		45.48	-10.75	-10.75	-11.25	-10.75	-11	-11	-10.5	-11.5	-11.25				45.48	-6.75	-5.75	-6.75	-6.5	-6.25	-6.75	-6.25	-7.25	-6.25
		45.52	-10.75	-11.25	-11.25	-11.5	-11	-11	-10.5	-11.75	-11				45.52	-7	-6.5	-6.5	-6.5	-6.5	-6.5	-6	-7.25	-6.25
		45.56	-10.5	-10.75	-10.75	-11.75	-11.5	-11	-10.25	-11	-10.75				45.56	-6.5	-6.5	-6	-6.5	-6.75	-6.25	-6	-6.75	-6
		45.6	-11	-11	-10.5	-11.75	-11.25	-11.25	-10	-11	-10.75				45.6	-6.25	-6.5	-6.25	-7.5	-6.75	-6.5	-5.75	-7	-6.25
		45.64	-10.5	-11	-9.75	-11	-11.25	-11.5	-11	-11.25	-11				45.64	-6	-6.25	-6.25	-7.25	-7	-6.75	-6.25	-7.25	-6.5
		45.68	-10	-11	-9.75	-10.25	-11.25	-11.75	-11.25	-11.5	-11.5				45.68	-5.75	-6.75	-6.75	-6.5	-6.75	-6.75	-6.5	-7	-6.75
		45.72	-10.25	-10.75	-9.75	-10.25	-11.25	-11.25	-11.5	-11.25	-11.5				45.72	-6	-6.75	-6.5	-5.75	-6.5	-7	-7	-6.5	-6.5
		45.76	-10.75	-11	-10.5	-10	-10.5	-11	-11.75	-11	-11.5				45.76	-6.25	-6.75	-6.75	-5.5	-6.5	-7.25	-7.25	-6.25	-6.5
		45.8	-11	-10.75	-11.25	-11	-10.25	-11.25	-11.25	-11	-11.5				45.8	-6.5	-7	-7	-6.25	-6.25	-7	-7	-6.5	-6.5
		45.84	-11	-10.5	-11	-10.75	-10.75	-11	-11.25	-10.5	-11.25				45.84	-6.5	-6.5	-6.75	-6.25	-6.5	-6.5	-7	-6.25	-6.75
		45.88	-11	-10.25	-10.75	-11	-11.5	-11.25	-11.5	-10.5	-11.5				45.88	-6.5	-6.25	-6.5	-6.75	-7	-6.25	-6.75	-6.25	-7.25
		45.92	-10.5	-10.5	-10.75	-11.25	-12.25	-11.25	-11.25	-10.75	-11.75				45.92	-6.5	-6.25	-6.25	-6.5	-7.25	-5.75	-6.75	-6.5	-7.75
		45.96	-10.25	-10.75	-11	-11.5	-11.5	-10.75	-11	-10.75	-12.25				45.96	-6.5	-6.5	-6.5	-6.5	-6.5	-5.5	-6.5	-6.25	-8
		46	-10.25	-11	-11	-11.5	-10.75	-11	-11	-11.5	-11.25				46	-6.75	-6.75	-6.25	-6.75	-6.75	-6	-6.5	-6.25	-7.75
		46.04	-10.25	-10.75	-11	-11	-10.5	-10.75	-10.75	-11.75	-10.25				46.04	-6.5	-6.5	-6.5	-6.5	-7	-6.75	-6.25	-6.75	-7
		46.08	-10.25	-10.5	-10.5	-10.25	-10.75	-11	-11	-11.75	-10.25				46.08	-6	-6.25	-6	-5.75	-7	-7	-7	-6.75	-6.25
		46.12	-10.75	-10.75	-10.5	-10.5	-10.75	-10.75	-11.25	-11.5	-10.75				46.12	-6.25	-6.5	-5.75	-6	-6.25	-6.5	-7.25	-7.25	-6.25
		46.16	-10.75	-10.75	-11	-10.75	-11	-10.75	-11.25	-11.5	-11				46.16	-6	-6.25	-6	-6.5	-6.25	-6	-6.75	-7.25	-6.5
		46.2	-10.25	-11	-10.75	-10.5	-10.75	-10.75	-11.5	-11	-10.75				46.2	-6	-6.5	-6.25	-6.5	-6.25	-6.5	-6.75	-6.75	-6.5
		46.24	-10.25	-11	-10.75	-9.75	-10.75	-10.75	-11.25	-11.5	-11				46.24	-6.25	-6.75	-6.75	-6	-6.75	-6.5	-6.25	-6.75	-6.75
		46.28	-10.25	-10.75	-10.75	-10	-11.25	-10.5	-11.75	-11.5	-11.25				46.28	-6.5	-6.75	-7	-6.25	-6.75	-5.75	-6.75	-6.75	-6.25
		46.32	-10.5	-10.75	-10.5	-10.5	-11	-10.25	-12	-11	-11.75				46.32	-6.25	-7	-6.75	-6	-6.25	-6	-7.25	-6.75	-6.25
		46.36	-10.5	-10.75	-10.25	-10.75	-11	-10.25	-11.75	-10.5	-11.75				46.36	-6.25	-6.5	-6.75	-6.25	-6.25	-6.5	-7	-6	-6.5
		46.4	-10.75	-10.25	-10.5	-11	-11.5	-10.75	-11.5	-11	-11.5				46.4	-6.25	-6.25	-6.5	-7	-6.5	-6.75	-6.75	-6.25	-6.75
		46.44	-11	-10.25	-11.25	-10.25	-11.25	-11.25	-11.25	-11.75	-11				46.44	-6.5	-6	-6.75	-7	-6.5	-7	-6.75	-6.75	-6.5
		46.48	-10.5	-11	-11.75	-10.25	-10.5	-11.25	-11.25	-12	-10.75				46.48	-6.25	-6	-7.25	-6.5	-6	-6.75	-6.5	-7	-6.5
		46.52	-10.25	-11.75	-11.75	-10.75	-10.5	-11.5	-11.25	-12	-10.75				46.52	-6	-6	-7	-6.5	-5.75	-7	-6.5	-7	-6.5
		46.56	-10.25	-11.5	-11.25	-10.5	-11.25	-11.25	-10.75	-11.5	-11				46.56	-5.75	-6.5	-6.25	-6	-6.5	-7	-6	-7	-6.25
		46.6	-11.25	-11	-11	-10.25	-11	-11	-10.75	-11.25	-11.5				46.6	-6.25	-6.75	-6	-5.75	-6.75	-6.5	-5.75	-7	-6.5
		46.64	-10.75	-10.5	-10.5	-10.5	-10.75	-10.75	-11.25	-11.5	-11.75				46.64	-6	-7	-5.75	-6	-7	-6.25	-6	-7.25	-6.75
		46.68	-10.25	-10.75	-10	-11.25	-10.75	-10.75	-11.5	-11.25	-11.75				46.68	-6	-7	-5.75	-6.75	-7	-5.75	-5.75	-6.75	-6.25
		46.72	-10.5	-11	-10.25	-11.75	-10.75	-10.75	-11	-11.25	-11.75				46.72	-6.5	-6.75	-5.75	-7	-6.75	-6.5	-6	-6.75	-6
		46.76	-10.5	-11.25	-10.75	-11.5	-11	-10.75	-10.75	-11	-11.75				46.76	-6	-6.75	-6.25	-7	-6.75	-7.25	-6.25	-6.75	-6.5
		46.8	-10.5	-11	-11.25	-10.5	-10.75	-11	-10.5	-11	-11.5				46.8	-6.25	-6.5	-6.75	-6.75	-6.5	-7	-6	-6.75	-6.75
		46.84	-10.5	-10.75	-11	-10.5	-11	-11.25	-10.75	-11	-11				46.84	-6	-6.25	-6.75	-6.25	-6.75	-6.75	-6.25	-6.75	-6.75
		46.88	-10.5	-11	-11	-10.75	-11.25	-11.25	-10.75	-10.5	-10.75				46.88	-6.5	-6.25	-6.25	-6.25	-6.75	-6.75	-6.75	-6	-6.5
		46.92	-10	-10.75	-10.5	-11	-11.75	-11	-11.25	-10.75	-11				46.92	-6.5	-6.25	-6.25	-6.75	-6.75	-6.25	-7	-6	-6.25
		46.96	-10	-11.25	-10.25	-10.75	-12.25	-10.75	-11.5	-10.75	-11.25				46.96	-6.5	-6.75	-6.25	-6.5	-6.75	-6.25	-6.75	-6.25	-6.25
		47	-9.75	-10.75	-10.5	-11	-11.75	-10.25	-11.25	-11.5	-11.25				47	-6.25	-6.25	-6.5	-6.5	-6.5	-6	-6.25	-7	-6.25
		47.04	-10.5	-10.5	-10.75	-10.75	-11	-10.75	-11.25	-11.75	-11.25				47.04	-6.5	-6.25	-6.25	-6.5	-6.25	-6.5	-6.25	-7	-6.75
		47.08	-10.75	-10.25	-11.25	-10.75	-10.75	-11.25	-11.25	-11.5	-11.25				47.08	-6.25	-5.75	-6.25	-6.25	-6.25	-6.5	-6.75	-7.25	-7.25
		47.12	-11.25	-10.25	-11.5	-11	-11.25	-11.25	-11.5	-11	-11.25				47.12	-6	-5.5	-6.5	-6.25	-6.5	-6.5	-6.75	-7.25	-7.25
		47.16	-11.5	-10.75	-11.25	-11.5	-11.75	-11.5	-12	-11.25	-11.5				47.16	-5.75	-6.5	-7	-6.75	-7	-7	-7.25	-6.75	-7
		47.2	-11.75	-11.5	-10.5	-11.5	-11.5	-11	-11.25	-11.25	-11.75				47.2	-6	-7.25	-7	-6.5	-7	-6.5	-7	-6.25	-7.25
		47.24	-11.25	-11.75	-10.5	-11.25	-11.25	-11	-10.75	-11.25	-11.25				47.24	-5.75	-7	-6.5	-6.75	-6.75	-6.5	-7	-6.75	-6.5
		47.28	-10.75	-11.25	-10.75	-10.5	-11.5	-10.75	-11.25	-11.25	-11				47.28	-6.25	-6.5	-6.5	-6.25	-6.75	-6.5	-6.75	-6.75	-6.75
		47.32	-10.5	-11.25	-10.75	-10.25	-11	-11.25	-11	-11.25	-11.25				47.32	-6	-6.75	-6.25	-6.25	-6	-7	-7	-6.5	-6.75
		47.36	-10.25	-10.75	-11	-11.25	-11	-11.5	-11.25	-10.75	-11.5				47.36	-6	-6.5	-6.25	-6.5	-6.5	-7	-6.75	-6.25	-6.75
		47.4	-10.25	-10.25	-11.25	-11.5	-11.25	-11	-11	-11	-11.5				47.4	-6.5	-5.75	-6.25	-6.25	-6.75	-6.75	-6.5	-6.5	-6.75
		47.44	-10.5	-10	-11.5	-11	-11.5	-11.25	-11.25	-12	-11.25				47.44	-6.25	-5.5	-6.5	-6.25	-7	-7	-6.5	-7.75	-6.75
		47.48	-10.5	-10.25	-11.75	-10.5	-11.75	-11.25	-11.75	-12	-11				47.48	-6.25	-6	-7	-6.5	-7.25	-7	-6.75	-7.25	-6.25
		47.52	-11	-10.75	-11.25	-10.75	-11.5	-10.75	-11.5	-11.75	-11				47.52	-6.75	-6.5	-7	-7	-6.75	-6.5	-7	-7	-6.5
		47.56	-10.75	-11	-11.25	-11	-11	-11	-11	-11.25	-11.25				47.56	-6.75	-6.5	-6.75	-6.75	-6	-6.25	-6.25	-6.25	-6.75
		47.6	-10.75	-11.25	-11.25	-10.5	-10.75	-11	-10.75	-11	-12				47.6	-6.75	-6.75	-6.75	-6.5	-5.75	-6.5	-6.25	-6.5	-7
		47.64	-10.75	-11.25	-11.25	-10.5	-10.5	-11	-10.5	-11	-12				47.64	-7	-6.75	-6.75	-6.5	-6.25	-6.25	-6	-6.5	-7.25
		47.68	-10.75	-11	-11.25	-11.25	-10.25	-11	-10.75	-11.75	-11.75				47.68	-7	-6.75	-6.75	-6.75	-6.25	-6	-6.5	-6.75	-7
		47.72	-10.75	-11	-11.5	-11.25	-11	-11.25	-11.25	-11.25	-11.25				47.72	-7	-6.75	-7	-6.25	-7	-6.25	-6.75	-6.5	-6.5
		47.76	-10.5	-11.5	-11.5	-11.25	-12	-11.75	-11	-11	-11				47.76	-7	-6.75	-7	-6.25	-7.25	-6.75	-6.25	-6.75	-6.5
		47.8	-11	-11.25	-11	-10.75	-12	-12	-10.5	-11	-11.25				47.8	-6.25	-6.5	-6.75	-6.5	-7	-7	-6	-6.75	-6.75
		47.84	-11	-11	-10.5	-10.75	-11.5	-12	-11	-11	-11				47.84	-5.75	-6	-6.25	-7	-6.75	-7.25	-6.75	-6.5	-6.75
		47.88	-10.75	-10.75	-10.25	-11	-11	-11.25	-11	-11	-10.25				47.88	-6.25	-5.5	-6	-6.5	-6.5	-6.75	-6.75	-6.25	-6.5
		47.92	-10.75	-10.75	-10.5	-11.25	-11.25	-11	-11	-11	-10.75				47.92	-6.25	-5.75	-6.5	-5.75	-7	-6.5	-6.75	-6.5	-6.5
		47.96	-10.5	-10.5	-10.5	-10.75	-11.5	-11	-11.25	-11.25	-11				47.96	-6	-6.75	-6.25	-5.75	-7.25	-6.5	-7	-6.5	-6.75
		48	-10.5	-11.25	-10.5	-10.5	-11.5	-10.75	-11.75	-11.25	-11				48	-6.25	-7.5	-6.25	-6	-7.25	-6.25	-7.25	-6.75	-6.75
		48.04	-10	-11.5	-10.75	-11	-11.25	-11.25	-11.5	-11.5	-11.5				48.04	-6.25	-7.5	-5.75	-6.5	-7	-6.5	-6.75	-7	-6.75
		48.08	-9.5	-11.25	-10.5	-11	-11	-11.75	-11.75	-11.5	-11.25				48.08	-5.75	-7	-6	-6.25	-6.75	-6.75	-6.75	-6.75	-6.5
		48.12	-10	-10.75	-10.5	-11	-10.75	-11.75	-11	-11.5	-11.25				48.12	-6	-6.5	-6.25	-6	-6	-6.5	-6.25	-6.75	-6.5
		48.16	-10.75	-10.5	-10.75	-10.75	-10.75	-11.75	-11	-10.75	-11.5				48.16	-6	-5.75	-6.25	-6.25	-5.75	-6.75	-6.75	-6.5	-6.5
		48.2	-11	-10.75	-10.75	-11	-10.75	-11	-10.75	-10.75	-11.75				48.2	-6	-5.75	-6	-6.5	-5.75	-6.5	-6.75	-6.75	-6.5
		48.24	-10.5	-11	-11	-11.25	-10.75	-10.75	-10.75	-11	-11.75				48.24	-5.5	-6	-6.5	-6.5	-6	-6.25	-6.5	-6.75	-6.75
		48.28	-10.25	-10.75	-10.75	-11.25	-10.75	-11	-11	-11.25	-11.5				48.28	-5.5	-6	-6.75	-6.75	-6	-6.25	-6.25	-6.25	-6.75
		48.32	-10.5	-10.5	-11	-10.75	-10.75	-11	-11.5	-11.25	-11.25				48.32	-6.25	-5.75	-6.75	-6.5	-5.75	-6.25	-6.25	-6	-7
		48.36	-11	-10.75	-11.25	-10.5	-11.25	-11	-11.75	-11.25	-10.75				48.36	-6.75	-6.25	-7	-6.5	-5.75	-6.5	-6.75	-6.5	-6.5
		48.4	-11.5	-11	-11	-10.75	-11.5	-10.75	-11.5	-11.5	-11				48.4	-6.75	-6.5	-6.25	-6.75	-5.75	-6.25	-6.75	-7.25	-6.25
		48.44	-11.25	-11.5	-11.25	-10.75	-11.25	-10.75	-11	-11.5	-11.25				48.44	-6.75	-6.25	-6.25	-6.5	-6	-5.75	-6.5	-7.5	-6.75
		48.48	-10.75	-11	-10.75	-10.75	-11.25	-10.75	-10.5	-11	-11.5				48.48	-6	-5.75	-6	-6.5	-6.25	-5.5	-6.25	-7	-6.5
		48.52	-10.5	-10.75	-11	-10.5	-11	-10.75	-10.5	-11.5	-11.75				48.52	-6	-6	-6.5	-6	-6.5	-5.75	-6.25	-6.75	-6.25
		48.56	-10.75	-11	-11.25	-11	-11.25	-11	-10.75	-11.5	-11.25				48.56	-6.25	-6.5	-6.75	-5.75	-7	-6.75	-6.25	-6.75	-6.5
		48.6	-11.25	-11	-11	-11	-11	-12	-11.5	-11.25	-10.75				48.6	-6.25	-6.5	-6.25	-6	-7	-7.5	-6.5	-6.75	-6.5
		48.64	-11.25	-11.25	-11.25	-11.25	-11.25	-12	-11.75	-11	-11				48.64	-6.25	-6.75	-6.5	-6.25	-7	-7.25	-6.75	-6.75	-7
		48.68	-11	-11.25	-11.75	-11.25	-11.25	-11.25	-11.5	-11	-11.25				48.68	-6.25	-6.5	-7	-6.5	-6.5	-7	-6.5	-7	-6.75
		48.72	-10.25	-11.25	-10.75	-10.5	-11	-11.25	-11	-10.75	-11.25				48.72	-6.25	-6.5	-6.75	-5.75	-6.25	-6.75	-6.25	-6.5	-6.75
		48.76	-9.75	-10.75	-10.75	-10.25	-11	-11	-11	-11	-11.75				48.76	-6	-5.75	-6.5	-5.25	-6.5	-6.75	-5.75	-6.5	-7
		48.8	-10.25	-11	-10.25	-10.25	-11.25	-11.25	-11	-11.5	-12				48.8	-6.5	-6	-5.75	-5.75	-6.5	-7	-6	-6.5	-7.25
		48.84	-11	-11	-10	-10	-11.5	-11	-10.75	-11.5	-11.75				48.84	-6.75	-6.25	-6	-6.25	-7	-7	-6	-6.75	-7.25
		48.88	-10.75	-11	-10.25	-10.5	-11.75	-11.5	-11.25	-11.25	-11				48.88	-6	-6.5	-6.5	-6.5	-7	-6.75	-6.5	-6.5	-6.5
		48.92	-10.75	-11	-10.25	-10.75	-11.25	-11.5	-11.25	-11.75	-11				48.92	-5.5	-6.5	-6.75	-6.5	-6.5	-7	-6.5	-7	-6.75
		48.96	-10.75	-10.75	-10.25	-11.25	-10.75	-11.25	-11	-11.5	-10.75				48.96	-6	-6.25	-6.5	-6.75	-6.25	-6.5	-6.25	-7	-6.25
		49	-10.75	-10.75	-10.25	-11.25	-10.75	-11.75	-11	-11.25	-11				49	-6.5	-6.5	-6.5	-7	-6.25	-6.75	-6.5	-7	-6
		49.04	-10.75	-10.5	-10.25	-11.5	-11.25	-11.75	-11.5	-11.25	-11.25				49.04	-6.5	-6.25	-6.25	-6.75	-6.5	-6.75	-7	-6.5	-6.5
		49.08	-10.5	-11.25	-10.5	-11.25	-11.75	-11.75	-11.75	-11.75	-11.25				49.08	-6.25	-7	-6.25	-6.75	-7	-6.5	-7	-6.75	-6.75
		49.12	-10.5	-11	-10.5	-10.75	-11.5	-11.25	-11.5	-11.75	-11.25				49.12	-6	-6.5	-6	-6.75	-6.75	-6	-7	-6.75	-6.5
		49.16	-10.5	-11	-10.75	-10.5	-11.5	-10.75	-11	-11.75	-11.25				49.16	-6.25	-6.75	-6	-6.75	-7	-6.5	-7	-6.75	-6.5
		49.2	-10.75	-11	-10.75	-10.75	-11.5	-11	-10.5	-11.75	-11.25				49.2	-6.5	-7.25	-6.25	-6.75	-7.5	-6.5	-7	-6.75	-6.25
		49.24	-10.75	-11.25	-10.75	-11.5	-11.5	-11.5	-10.75	-11.5	-11.5				49.24	-7	-7.25	-6.75	-6.5	-7	-6.75	-6.75	-6.25	-6
		49.28	-10.25	-11.25	-10.75	-11.75	-11.5	-11.5	-10.75	-11.5	-11.25				49.28	-6.5	-7	-6.5	-6.5	-6.25	-6.5	-5.75	-6.75	-6.25
		49.32	-10.5	-11.25	-10.75	-11.75	-11.25	-11.25	-11	-11.75	-11				49.32	-6.25	-6.5	-6.75	-6.75	-6	-6.75	-6.25	-7.25	-7
		49.36	-10.5	-11	-10.75	-10.75	-11	-11	-11.5	-11.75	-11.25				49.36	-6.25	-6.25	-6.5	-6.75	-6.25	-7	-7	-7.25	-7.25
		49.4	-10.5	-10.75	-11	-11	-11.25	-10.75	-11.5	-11.5	-11.75				49.4	-6	-6	-6.75	-6.5	-6.5	-6.75	-6.5	-7	-7.25
		49.44	-10.75	-10.75	-11.25	-11	-11.5	-11.25	-11.75	-11	-11.75				49.44	-6	-6.5	-7	-6.5	-7.25	-6.5	-6.75	-6.5	-6.75
		49.48	-10.75	-10.75	-11	-11.25	-11.25	-11	-12.25	-10.75	-11.5				49.48	-6	-7	-6.25	-6.5	-6.75	-6.5	-7.25	-6.5	-6.5
		49.52	-10.75	-11.25	-11	-12	-11	-10.75	-11.5	-11	-11.75				49.52	-6.25	-6.5	-6.25	-6.75	-6.75	-6.25	-7	-6.75	-6.75
		49.56	-10.5	-11.5	-11	-11.75	-11	-11.25	-11.25	-11	-11.5				49.56	-6.25	-6.25	-6.25	-6.75	-6.25	-6.75	-6.5	-6.75	-6.5
		49.6	-9.75	-11.25	-11.25	-11.5	-11	-11	-11	-11	-11.25				49.6	-6	-6.25	-6.25	-6.25	-6.5	-6.75	-6.5	-6.5	-6.5
		49.64	-9.75	-10.75	-11.25	-11.5	-11	-11	-11.25	-11	-11				49.64	-6.25	-6	-6.5	-6.25	-6.25	-6.75	-6.5	-6.75	-6.5
		49.68	-10	-10.25	-11	-11.75	-11	-11.25	-11	-10.75	-11.25				49.68	-6	-6.25	-6.5	-6.75	-6.25	-6.5	-6.5	-6.5	-6.75
		49.72	-10.25	-10.5	-11.5	-11	-11.25	-10.75	-11	-11.5	-11				49.72	-6.25	-6.5	-6.5	-6.75	-6.25	-6.25	-6.25	-6.75	-6.25
		49.76	-10.25	-10.75	-11.25	-10.25	-11.25	-10.75	-11	-11.75	-11.25				49.76	-6.25	-6.5	-6.75	-6.5	-6.5	-6.5	-6.25	-6.5	-6.25
		49.8	-10	-11.5	-10.75	-10.25	-11	-11	-10.75	-11.75	-11.75				49.8	-6	-7	-6.5	-6.5	-6.25	-6.5	-6	-6.5	-6.75
		49.84	-10	-10.75	-10.75	-10.75	-11.5	-10.75	-10.75	-11.25	-11.75				49.84	-6	-6.25	-6.5	-6.25	-7	-6.5	-5.75	-6	-7
		49.88	-11	-10.25	-10.75	-10.75	-11.25	-11	-11	-11.25	-11.5				49.88	-6.5	-6	-6.25	-6	-7	-6.75	-5.75	-6.5	-6.75
		49.92	-11.5	-10.5	-11	-10.5	-10.75	-11	-11	-11.25	-11.25				49.92	-6.5	-6.25	-6.25	-6.25	-6.25	-6.25	-5.75	-6.5	-7
		49.96	-12	-11.25	-11	-10.75	-11	-11.25	-11.25	-11	-11.5				49.96	-6.75	-6.5	-6.5	-6	-6.25	-6.25	-6.5	-6.25	-7.25
		50	-11.5	-11.5	-10.75	-10.5	-11.75	-11.25	-11.25	-11.25	-11.25				50	-7	-6.5	-6.5	-6	-7	-6.5	-6.5	-6.5	-7
		50.04	-10.75	-11.75	-10.5	-10.75	-11.25	-11	-11.25	-11.75	-11.5				50.04	-7	-6.75	-6.25	-6.5	-7.25	-6.5	-6.5	-6.75	-7
		50.08	-10.25	-11.5	-10.75	-11.25	-11.25	-11	-11.25	-11.75	-11.5				50.08	-6.75	-6.5	-6.5	-6.5	-6.75	-6.5	-6.75	-6.75	-7.25
		50.12	-9.75	-11.25	-11.25	-11.5	-11	-11	-11.75	-11.25	-11.5				50.12	-6.25	-6.5	-6.5	-7	-6	-6.75	-6.5	-6.25	-6.75
		50.16	-9.5	-11.5	-11.25	-11.75	-11.25	-11.25	-11.75	-11	-11.75				50.16	-5.75	-6.75	-6.25	-7	-6.5	-6.75	-6.75	-6.5	-6.5
		50.2	-10	-11.5	-11	-11	-11.5	-11.5	-11.75	-11.25	-11.75				50.2	-6	-7	-6.25	-6.5	-7	-7	-7.25	-6.75	-6.5
		50.24	-10.5	-11	-10.75	-10.75	-11.75	-11.25	-11.25	-11.5	-12				50.24	-6.5	-6.75	-6.5	-6.25	-7	-7	-7.25	-6.75	-6.75
		50.28	-10.75	-10.25	-11.25	-11	-11.25	-11	-11	-11.75	-11.75				50.28	-6.5	-6.25	-7	-6.25	-7	-6.5	-7.25	-7	-7
		50.32	-11	-10.5	-11	-10.75	-11.25	-11.5	-10.5	-11.5	-11.5				50.32	-6.25	-6	-6.5	-6.25	-6.75	-6.75	-6.5	-7.5	-6.75
		50.36	-11	-11	-10.75	-10.75	-11.25	-11.5	-11	-11.5	-11.25				50.36	-5.75	-6.25	-6.5	-6.25	-6.75	-6.75	-6.25	-7	-6.75
		50.4	-11	-11	-10.5	-11.25	-11.5	-11.75	-10.5	-11.75	-10.75				50.4	-5.75	-7	-6.25	-6.75	-7	-7	-5.75	-6.75	-6.25
		50.44	-10.75	-11	-10.75	-11.5	-11.75	-11.5	-10.25	-11	-10.75				50.44	-6	-7.25	-6	-7	-6.75	-6.75	-5.5	-6.5	-6
		50.48	-11	-10.75	-11	-11.25	-11.25	-11.25	-10.5	-11.25	-10.75				50.48	-6.5	-6.75	-6.25	-6.75	-6.75	-6.75	-6.25	-7	-6.25
		50.52	-11.5	-10.5	-10.75	-11	-10.75	-11.25	-11.25	-11.5	-10.75				50.52	-6.75	-6.25	-6.25	-6.75	-6.5	-6.5	-6.5	-7.25	-6.25
		50.56	-10.75	-11.5	-10.75	-11.25	-11	-11	-11.5	-11.25	-11				50.56	-6.5	-6.75	-6.5	-7	-6.75	-7	-6.75	-6.75	-6.75
		50.6	-10.75	-11.5	-11.25	-11	-11.5	-11	-11.25	-11	-11.25				50.6	-6.5	-6.5	-6.75	-7	-7	-6.75	-6.25	-6.5	-7
		50.64	-11	-10.75	-11.5	-11.25	-11.5	-11.25	-12	-10.75	-12				50.64	-7	-6.25	-6.75	-7	-6.5	-7	-6.75	-6.25	-7.25
		50.68	-11	-10.75	-11.5	-11	-11.5	-11.75	-11.75	-11	-12.5				50.68	-7.25	-6.75	-6.75	-6.5	-6.75	-7.25	-6.75	-6.25	-7
		50.72	-11	-10.5	-11.25	-11	-11	-11.75	-11.25	-11.75	-12				50.72	-7	-6.75	-7	-6.5	-6.75	-7	-6.5	-6.75	-6.75
		50.76	-11	-10.5	-11.5	-11.5	-11.25	-11.25	-11.25	-11.75	-11.25				50.76	-6.25	-6	-7.25	-7	-6.75	-6.5	-6.75	-7	-6.75
		50.8	-10.75	-10.75	-11	-11.25	-11	-11	-11.75	-12	-10.75				50.8	-6.25	-6	-6.75	-6.75	-7	-6.5	-7	-7.25	-6.75
		50.84	-11.25	-10.5	-11.25	-10.75	-11.5	-11	-11.5	-11.75	-11.25				50.84	-6.5	-6	-7.5	-6.5	-7.25	-6.5	-7	-7.25	-6.75
		50.88	-11.5	-10.75	-11.25	-10.75	-12	-11	-11.25	-11.25	-11.25				50.88	-7	-6.25	-7.25	-6.75	-7	-6.5	-7	-6.75	-6.5
		50.92	-11	-11.5	-11.25	-10.25	-11.5	-11.5	-11.5	-11.5	-11				50.92	-6.75	-7	-7	-6.5	-6.5	-7	-6.75	-7	-6.25
		50.96	-10.25	-11.5	-11	-10.5	-11	-12	-11	-11.5	-11				50.96	-6.75	-7	-7	-6.25	-6.25	-7.25	-6.25	-7	-6.5
		51	-10	-11	-11.25	-11.25	-10.75	-11.25	-11	-10.75	-11.75				51	-6.5	-6.75	-7.25	-6.75	-6.5	-6.5	-6.25	-6.5	-7.25
		51.04	-10.25	-11.25	-11.25	-11.5	-11	-11	-10.5	-10.25	-11.25				51.04	-6.5	-6.5	-7	-6.75	-6.75	-6.75	-6	-6.25	-7
		51.08	-10.5	-11	-11	-11.25	-11.5	-10.75	-10.5	-10.5	-11				51.08	-6.75	-5.75	-6.5	-6.5	-7	-7	-6.25	-6.75	-6.75
		51.12	-10.75	-11	-11	-11	-11.25	-11	-11	-11.25	-11.25				51.12	-6.75	-5.75	-6.25	-6.5	-6.75	-7.5	-6.75	-6.75	-6.75
		51.16	-10.5	-11	-11.25	-10.75	-11.25	-11.25	-11.25	-11.75	-11.5				51.16	-6	-6.5	-6.25	-6.25	-6.5	-7	-6.75	-6.5	-7
		51.2	-10.5	-10.75	-11	-11	-11	-11	-12	-11.75	-12				51.2	-6	-6.5	-6	-6.75	-6.5	-6.5	-7	-7	-7.25
		51.24	-10.75	-10.75	-11.25	-11.5	-11	-10.75	-12.25	-11.5	-11.25				51.24	-6	-7	-6.25	-6.5	-6.75	-6.25	-7	-7.5	-6.25
		51.28	-11	-11.25	-11.5	-11	-11.5	-10.75	-11.75	-11.25	-11				51.28	-7	-6.75	-6.5	-6	-6.75	-6	-6.75	-7	-5.75
		51.32	-11	-11.75	-11	-11.25	-11.5	-11	-11.75	-11.5	-10.75				51.32	-7.25	-6.5	-6	-6.75	-6.75	-5.75	-6.75	-7	-5.75
		51.36	-10.75	-11.5	-11	-11	-11	-10.75	-11.75	-12	-10.75				51.36	-7	-6.5	-6.5	-6.75	-6	-5.75	-6.75	-7.25	-6
		51.4	-11	-11.5	-11.25	-11	-11.25	-11.25	-11.75	-12.5	-10.5				51.4	-7	-6.75	-6.75	-6.75	-6.25	-7	-6.75	-7.5	-6
		51.44	-10.25	-11.25	-10.75	-11.25	-11.75	-12	-11.5	-12.5	-11.25				51.44	-6.75	-6.75	-6.25	-7	-7	-7.5	-6.25	-7.5	-6.5
		51.48	-10.25	-11	-10.5	-11	-12	-11.5	-11.25	-12	-12				51.48	-6.75	-6.75	-6.5	-7	-7.25	-7.5	-6	-6.75	-7.25
		51.52	-10.75	-10.5	-10.25	-10.75	-11.5	-11	-11.5	-11.25	-11.5				51.52	-6.75	-6.5	-6.5	-7	-7	-6.75	-6.5	-6.75	-7.25
		51.56	-11	-10.25	-10.5	-11.25	-11	-10.75	-11.5	-11.25	-11				51.56	-6.75	-6.5	-6.5	-6.75	-7	-6.25	-6.75	-6.75	-7
		51.6	-11.5	-11	-11	-11.25	-11.5	-10.75	-11.25	-11	-11.25				51.6	-6.25	-6.75	-6.5	-6.25	-7.25	-6.25	-6.5	-6.5	-6.75
		51.64	-11.25	-11	-10.75	-11.25	-11.25	-11	-11.25	-11	-11				51.64	-6	-6.25	-6.25	-6.25	-7	-6.25	-6.75	-6.75	-6.25
		51.68	-10.5	-10.75	-10.75	-11.25	-11	-11	-11.5	-11.25	-10.75				51.68	-6	-6.25	-6.5	-6.5	-7	-6.25	-7	-6.5	-6
		51.72	-10.5	-11	-11	-11.25	-10.5	-11.25	-12	-11.25	-10.75				51.72	-6.25	-6.25	-6.5	-6.25	-6.5	-6.75	-7.25	-6.5	-6
		51.76	-10.25	-11	-11.75	-11.25	-10.5	-11.5	-12	-11.5	-11.25				51.76	-6	-6.5	-6.75	-6.5	-6	-6.5	-7.5	-6.5	-6.5
		51.8	-10.25	-10.75	-11.25	-11.25	-10.75	-11.25	-12.5	-11.75	-11.5				51.8	-5.75	-6.5	-6.75	-6.75	-6	-6.25	-7.5	-7	-6.75
		51.84	-10.5	-10.75	-11	-10.5	-11.5	-11.75	-12.25	-11.25	-11				51.84	-6.5	-6.75	-6.25	-6.25	-7	-6.25	-7.25	-7	-7
		51.88	-10.5	-10.5	-10.75	-10.75	-11.5	-11.25	-11.25	-11.25	-11.25				51.88	-6.5	-6.5	-6.5	-6.5	-7.5	-6.25	-6.5	-6.5	-6.75
		51.92	-11	-11.25	-10.75	-11	-10.75	-11.25	-11.5	-11.5	-11.75				51.92	-7	-6.5	-6.75	-6.5	-7	-6.75	-6.75	-6.75	-6.75
		51.96	-11.25	-11.5	-10.5	-11.5	-11.25	-11.5	-11.5	-11	-11.5				51.96	-7	-6.5	-6.75	-7	-6.75	-7.5	-6.5	-6.25	-6.75
		52	-11	-11.5	-11	-10.75	-11.5	-11.5	-11.25	-11	-11.25				52	-6.75	-6.5	-6.5	-6.5	-6.75	-7.5	-6.75	-6.5	-7
		52.04	-11.25	-11.75	-11	-11	-11.25	-11.5	-11.25	-11.25	-11.75				52.04	-6.5	-7.25	-6.5	-6.25	-6.5	-7	-7	-6.75	-7
		52.08	-11.25	-11.25	-11	-11.5	-11.5	-11.25	-10.75	-11	-11.5				52.08	-5.5	-7	-6.25	-6.5	-6.5	-7	-6.75	-7	-6.5
		52.12	-11	-11.25	-11	-11.25	-11.25	-11.75	-10.75	-11.25	-12				52.12	-5.75	-6.5	-6.75	-6	-6.5	-7.5	-6.75	-6.75	-6.75
		52.16	-11	-11.5	-11.5	-11.25	-11.25	-11.75	-10.75	-11.75	-12.5				52.16	-6.5	-6.75	-6.75	-6.25	-6.75	-7.5	-6.5	-6.75	-7
		52.2	-10.75	-11	-11.75	-11.75	-11.75	-11.75	-11.5	-11.5	-11.75				52.2	-6.75	-6.75	-6.75	-6.5	-7.25	-7.5	-6.25	-6.75	-6.5
		52.24	-10.5	-10.25	-11.5	-12	-11.75	-11	-11.5	-11.75	-11.5				52.24	-6.5	-6.5	-7	-6.75	-7	-6.75	-6	-7	-6.5
		52.28	-10.75	-10.75	-11.5	-11.5	-11.75	-11.25	-11.5	-11.75	-11.25				52.28	-6.75	-6.75	-6.75	-6.75	-7	-6	-6	-7	-6.5
		52.32	-10.75	-10.5	-12	-11	-11.25	-11.5	-11.75	-11.25	-11.5				52.32	-6.5	-6.25	-6.5	-6.75	-7	-6	-6.5	-6.5	-6
		52.36	-11	-10.75	-11.75	-10.75	-10.75	-11.25	-11.25	-10.5	-11.75				52.36	-6.75	-6.5	-6.5	-6.75	-6.75	-6.25	-7	-6.25	-6.5
		52.4	-11.25	-10.75	-11.5	-11	-10.75	-10.75	-11.5	-10.75	-11.75				52.4	-7.25	-6.75	-6.25	-6.5	-7	-6	-7.25	-6.75	-6.5
		52.44	-11.25	-10.75	-11.5	-11	-10.5	-10.25	-11.75	-10.75	-12				52.44	-7	-6.25	-6.5	-6.25	-6.25	-6	-7	-6.25	-6.5
		52.48	-11.25	-11.5	-11.5	-11.25	-11	-10.5	-12	-10.5	-12				52.48	-6.5	-6	-6.75	-7	-6.25	-6.25	-7	-6	-6.75
		52.52	-11.25	-11.75	-11.25	-11	-10.75	-11.25	-12	-10.75	-11.75				52.52	-6.25	-6.25	-7	-7	-6	-6.75	-7	-6.25	-6.5
		52.56	-10.5	-11.5	-10.75	-11	-11.5	-11.5	-11.75	-11.5	-11				52.56	-6	-6.25	-6.5	-7	-6.25	-7	-7	-6.75	-6.5
		52.6	-10.5	-11	-11.5	-11	-11.5	-11.25	-11	-11.25	-11				52.6	-6.25	-6.25	-6.75	-6.25	-6.25	-7.5	-6.5	-6.75	-6.25
		52.64	-10.5	-10.75	-11.5	-10.75	-11.75	-11	-11.25	-11.25	-11.25				52.64	-6.25	-6.25	-7	-6	-6.75	-6.75	-6.5	-6.5	-6.25
		52.68	-10.25	-11	-11	-11.25	-11.75	-11	-11.25	-11.25	-11.5				52.68	-6.25	-6.5	-6.5	-6.5	-6.75	-6.75	-6.75	-6.75	-6.5
		52.72	-10.75	-11	-11	-11.5	-11.5	-11	-11.25	-11.25	-11.75				52.72	-6.75	-6.5	-6.75	-7.25	-6.75	-6.5	-7	-6.75	-6.75
		52.76	-11.25	-11.25	-11	-11	-11	-11.25	-11.25	-11.5	-11.5				52.76	-6.75	-6.5	-6.5	-7.25	-6.5	-6.25	-6.25	-6.75	-6.25
		52.8	-11.5	-11.75	-10.75	-10.5	-11.25	-11	-11.25	-12.5	-11.5				52.8	-6.75	-7	-6	-6.75	-6.25	-6.5	-6.25	-7.5	-6.5
		52.84	-10.75	-11.5	-10.75	-10.5	-11.25	-10.75	-11.75	-12.25	-11.5				52.84	-6.75	-6.25	-6	-6.5	-6.25	-6.5	-6.5	-6.5	-7
		52.88	-10.5	-12	-11	-10.75	-11	-10.5	-12	-11.5	-11.25				52.88	-6.25	-6.5	-6.5	-6.25	-6.25	-6.25	-7	-5.75	-7
		52.92	-10.75	-11.75	-11	-11.25	-11.5	-10.5	-12	-11.25	-11.75				52.92	-6.25	-6.75	-6.5	-6	-6.75	-6	-7.25	-6.25	-6.75
		52.96	-11	-11.25	-11	-11.25	-12	-11.5	-11.5	-11.25	-12				52.96	-6	-7	-6.25	-6	-6.75	-6.5	-7.5	-6.5	-6.75
		53	-11.25	-11.25	-10.5	-10.5	-11.5	-11.5	-11	-11.5	-12.25				53	-6.5	-6.75	-6	-6	-6.25	-6.75	-7	-6.75	-7.25
		53.04	-11.5	-11	-10.75	-10.75	-11.5	-12	-10.75	-11.75	-11.75				53.04	-6.75	-6.25	-6.5	-6.25	-6.5	-7	-7	-6.75	-7.25
		53.08	-11	-10.75	-11.25	-11.5	-11.5	-11.75	-11.25	-11.5	-11.25				53.08	-7	-6.25	-7	-6.75	-7	-6.75	-7	-7	-6.75
		53.12	-10.75	-11.25	-11.25	-11.5	-11.75	-11.75	-11.25	-11.75	-10.75				53.12	-6.75	-6.5	-7	-6.5	-7	-6.5	-6.5	-7.5	-6.5
		53.16	-10.5	-11.5	-11.5	-11	-11.25	-11.75	-11	-11.75	-10.5				53.16	-6	-6.75	-7.5	-6.75	-6.75	-6.75	-6.25	-7.5	-6.5
		53.2	-10.5	-10.75	-11.75	-10.5	-11.25	-11.5	-11.25	-11.5	-11				53.2	-5.25	-6.5	-7.25	-6.5	-6.75	-7	-6.5	-7.25	-6.75
		53.24	-10.25	-10	-11.5	-10.5	-11	-11.75	-11.5	-11.25	-11.25				53.24	-5.25	-6.25	-6	-6.25	-6.5	-7.25	-6.5	-6.75	-6.25
		53.28	-10	-10	-11.25	-10.5	-11	-11.75	-11.75	-11	-11.25				53.28	-6	-6	-5.75	-6	-6.25	-7	-7	-6	-5.75
		53.32	-9.75	-10.5	-11.25	-11	-11.75	-11.75	-12	-10.75	-11.25				53.32	-6	-6.5	-6.5	-6.75	-6.5	-7	-7.25	-6	-5.75
		53.36	-10	-11	-11.5	-11	-11.5	-11.5	-11.75	-10.75	-11.25				53.36	-6.25	-6.75	-7.25	-7.25	-6.75	-6.75	-6.75	-6.25	-6.25
		53.4	-10.75	-11.5	-11.75	-11	-11.5	-11.25	-11.5	-11.25	-11.25				53.4	-6.25	-6.5	-7.5	-7	-7	-6	-6.75	-6.5	-6.75
		53.44	-11.5	-11.75	-11.75	-11.25	-11.5	-11.5	-11.5	-11.5	-11.5				53.44	-7	-6.25	-7.5	-7	-7.25	-6.25	-6.5	-6.5	-7.25
		53.48	-11.5	-11	-11.5	-11.25	-11.25	-11.5	-11.5	-11.25	-11.25				53.48	-6.75	-6.25	-7.5	-7.25	-7	-6.75	-6.25	-6.25	-6.5
		53.52	-11	-11	-11.5	-11	-11.5	-11.25	-11.25	-11.25	-11				53.52	-6.5	-6.5	-7	-7	-7.25	-6.75	-6	-6.75	-6.25
		53.56	-10.75	-11.5	-11	-10.25	-11.75	-10.75	-11.5	-11	-11				53.56	-6	-7	-6.75	-6.5	-7	-6.25	-7	-6.75	-6.25
		53.6	-11	-12	-11.25	-10.25	-11.5	-10.25	-11.75	-10.75	-10.75				53.6	-6.25	-7	-6.75	-6.25	-7	-5.75	-7.25	-6.5	-6.25
		53.64	-11	-12	-11	-10.5	-10.75	-10.25	-12	-10.5	-11				53.64	-5.75	-7	-6.5	-7	-6.25	-6	-7.25	-6	-6.25
		53.68	-11	-12	-11	-11.5	-10.5	-10.75	-11.75	-11	-11.5				53.68	-6	-7	-6.25	-7.5	-6	-6.5	-7	-6.5	-6.5
		53.72	-10.75	-11.75	-10.75	-11.5	-10.75	-11.25	-11.25	-11	-11.5				53.72	-6.25	-7	-6.25	-7	-6.25	-6.75	-7	-6.75	-7
		53.76	-10.75	-11.5	-11	-11	-10.75	-11.5	-11.25	-11	-11.75				53.76	-6.25	-6.75	-6.25	-6.25	-7	-6.5	-7	-6.75	-6.75
		53.8	-10.5	-11.5	-11.25	-11	-10.75	-12.25	-11.25	-10.75	-12				53.8	-6.5	-6.75	-7	-6.25	-7	-7.25	-7.25	-6.25	-6.5
		53.84	-10.75	-11.25	-11.5	-10.75	-11	-12.5	-11.25	-11.25	-12.25				53.84	-6.75	-6.75	-7.25	-5.75	-7	-7.25	-7	-6.25	-6.75
		53.88	-10.5	-11.25	-11.5	-10.5	-11.25	-11.75	-11.75	-11.5	-12				53.88	-6.5	-6.75	-7	-6	-6.75	-6.75	-6.75	-6.75	-6.75
		53.92	-10.75	-10.5	-11	-10.75	-11.75	-11.25	-11.25	-11.25	-11				53.92	-6.5	-6.5	-6.5	-6.5	-6.5	-6	-6.5	-6.75	-6.5
		53.96	-11	-10.25	-10.75	-10.75	-11.5	-10.5	-11.5	-11	-11				53.96	-6.5	-6.25	-6	-6.25	-6.5	-5.5	-6.75	-6.5	-6.5
		54	-11	-10.75	-10.25	-11	-11.25	-10.75	-11	-12	-11.75				54	-6.5	-6.25	-6	-6.25	-6.25	-6	-6.75	-6.75	-6.5
		54.04	-11.5	-10.75	-10.25	-10.75	-10.75	-11	-10.5	-12	-12				54.04	-6.25	-6.75	-6.25	-6	-6	-6.75	-6.25	-7	-7
		54.08	-11.75	-11	-10.25	-10.5	-10.5	-10.5	-11	-11.25	-11.5				54.08	-6.5	-6.75	-6.25	-5.75	-6.25	-6.5	-6.25	-7	-7
		54.12	-11.5	-11.5	-11.25	-10.75	-10.75	-11.25	-11.25	-11	-11.5				54.12	-6.75	-6.5	-7	-6.25	-6.5	-6.75	-6.5	-6.75	-6.75
		54.16	-11.5	-11.5	-11.75	-11	-11	-11	-11.25	-11	-11.5				54.16	-6.75	-6.5	-7.25	-6.5	-6.5	-7	-7	-6.75	-6.5
		54.2	-10.5	-11.5	-11.25	-11.25	-11.25	-11.25	-11.25	-11.25	-11.75				54.2	-6	-6.75	-6.25	-6.25	-6.5	-6.75	-6.75	-6.5	-7
		54.24	-10.25	-11.25	-11.5	-11	-11.5	-11.25	-11.25	-11.5	-12				54.24	-6	-6.5	-6.25	-6.25	-7.25	-6.5	-6.5	-6.75	-7
		54.28	-10.25	-11.25	-11.75	-11.25	-11.5	-11.5	-11.25	-11.25	-11.5				54.28	-6.5	-6.75	-6.5	-6.5	-7.25	-6.75	-6.25	-6.25	-6.75
		54.32	-10.5	-11	-11.25	-11.25	-12	-12	-11.25	-11	-11.5				54.32	-6	-6.75	-6.5	-6.75	-7	-7.25	-6.25	-6	-7.25
		54.36	-10.5	-11.5	-11	-11.5	-11.5	-12.5	-11.25	-11.75	-11.25				54.36	-6.5	-7	-6.25	-7.25	-6.75	-7.25	-6.25	-6.5	-6.75
		54.4	-10.25	-11.25	-10.75	-11.75	-11.75	-11.5	-11.5	-11.75	-11.25				54.4	-6.5	-6.75	-6	-7.25	-7	-6.5	-6.5	-6.75	-6.25
		54.44	-10.5	-10.5	-10.25	-11.75	-12	-11.25	-11.5	-11.5	-11.75				54.44	-6	-6.25	-6	-7	-6.75	-6.5	-6.75	-7	-6.5
		54.48	-10.5	-10.5	-10.5	-11.75	-11.5	-11	-11.75	-11.25	-11.5				54.48	-6	-6.25	-6.5	-7.25	-6.25	-6.75	-6.75	-6.75	-6.5
		54.52	-11.25	-10.75	-11	-11	-11.25	-11.5	-11.5	-11	-11.5				54.52	-6.5	-6	-6.75	-7.25	-6.5	-6.75	-6.5	-6.75	-6
		54.56	-11.25	-11	-11.25	-10.25	-11.25	-11.5	-11.25	-12	-11.5				54.56	-6.5	-6	-6.75	-6.5	-6.75	-7	-6.75	-6.75	-6.25
		54.6	-11	-11.25	-10.75	-10.5	-10.75	-11.75	-11	-11.75	-11.5				54.6	-6	-6.25	-6.75	-6	-6.5	-7.25	-6.75	-7	-6.75
		54.64	-10.5	-11.25	-10.25	-10.75	-10.75	-11.5	-11.5	-11.5	-11.25				54.64	-6	-6.5	-7	-5.75	-6.5	-7.25	-7	-7	-6.5
		54.68	-10.75	-11.5	-10.25	-10.75	-10.5	-11.25	-11.25	-11	-10.75				54.68	-5.75	-6.75	-6.25	-5.75	-6.75	-6.75	-7	-6	-6.25
		54.72	-10.75	-11.5	-11	-11	-10.75	-11.25	-11.75	-10.75	-11.25				54.72	-6.25	-7	-6	-6.25	-6.5	-7	-7.5	-6.25	-6.5
		54.76	-10.75	-11.25	-10.75	-11	-11.25	-11	-12	-11.5	-11.25				54.76	-6.75	-7	-6.25	-6.75	-6.5	-6.75	-7.75	-7.5	-6.5
		54.8	-11.5	-11	-11	-11.25	-11.5	-11	-11.5	-12	-10.75				54.8	-7.25	-6.5	-7	-6.75	-6.75	-6.25	-7	-7.5	-6.5
		54.84	-11	-11.25	-11.5	-11.5	-11.5	-11	-11.5	-11.75	-11				54.84	-7	-6.25	-7	-7.25	-6.75	-5.75	-6.75	-7.5	-7
		54.88	-11.25	-11	-11.5	-11.25	-11.25	-10.75	-11.5	-11.5	-11.75				54.88	-6.75	-6	-6.5	-7	-6.75	-5.75	-7	-7	-7.25
		54.92	-11.25	-10.5	-10.75	-11	-10.75	-10.75	-10.75	-10.75	-11.75				54.92	-6.75	-5.75	-6	-6.75	-6.5	-6.25	-6.75	-6.75	-7.25
		54.96	-11.25	-10.75	-10.5	-11	-11.25	-10.5	-10.5	-10.5	-11.75				54.96	-6	-6.5	-6	-7	-6.75	-6.5	-6.5	-6.5	-7.25
		55	-11	-10.75	-11.25	-11.25	-11.25	-11	-11	-10.5	-11.75				55	-6.25	-6.5	-6.75	-7.25	-6.75	-6.5	-6.75	-6	-7.5
		55.04	-11	-11	-11.25	-11	-11.25	-11	-11.5	-10.25	-12				55.04	-6.75	-6.5	-6.5	-7	-6.25	-6.5	-6.75	-6	-7.75
		55.08	-11.25	-11.25	-11.75	-11	-11.5	-11	-12.25	-10.75	-11.75				55.08	-7	-6.75	-6.5	-6.25	-6.5	-6.5	-7	-6.25	-7.25
		55.12	-11.25	-11.25	-11.25	-11	-11.5	-11	-12.5	-11.25	-11.25				55.12	-7	-6.5	-6.25	-5.75	-6.5	-6.5	-7	-6.5	-6.5
		55.16	-10.5	-11.25	-10.75	-11.25	-11.5	-11.25	-11.5	-11.5	-11.25				55.16	-6.25	-6.5	-6.5	-6.25	-6.5	-7	-6.5	-6.75	-6.5
		55.2	-10.25	-11	-11.25	-11	-11.25	-11	-10.75	-11.75	-10.5				55.2	-6	-6.5	-6.5	-6	-6.25	-6.5	-6.25	-6.75	-6.25
		55.24	-10.5	-10.75	-11.5	-10.5	-11.25	-11.5	-10.75	-11.25	-10.75				55.24	-6	-6.5	-6.5	-6	-6.5	-7	-6.5	-6.25	-6.75
		55.28	-10.5	-10.25	-11.25	-10.5	-10.75	-11.5	-11	-11.25	-10.75				55.28	-6.25	-6	-6.75	-6.25	-6.25	-6.5	-6.75	-6.25	-6.5
		55.32	-10.5	-10.25	-11.5	-11	-11.25	-11.25	-11.5	-11	-11				55.32	-6.5	-6.75	-6.75	-6.75	-6.75	-6.25	-6.5	-6.5	-7
		55.36	-10.75	-10.5	-11.25	-10.75	-11.5	-11	-11.25	-11.25	-11				55.36	-6.25	-6.75	-6.5	-6.75	-7	-6.75	-6.5	-6.25	-6.75
		55.4	-10.75	-10.75	-10.75	-11.25	-11	-11.25	-11	-11.25	-10.75				55.4	-6	-6.25	-6.5	-7	-6.5	-6.75	-6.75	-6.25	-6
		55.44	-10.75	-11.5	-11.25	-11.5	-11	-11.75	-10.75	-11.5	-11				55.44	-6.25	-6.25	-7.25	-7	-6.5	-6.75	-6.75	-6.25	-6.25
		55.48	-10.25	-12	-11	-10.75	-11.25	-11.5	-10.75	-11.75	-11.25				55.48	-6	-6.75	-7	-6.75	-6.75	-6.75	-6.75	-6.75	-6.5
		55.52	-10	-12	-11	-11	-11.25	-11.25	-11	-11.5	-11				55.52	-5.75	-7	-6.75	-6.5	-7	-6.5	-6.25	-6.75	-6.25
		55.56	-10.25	-11.5	-10.75	-11	-11.25	-10.75	-11	-11.5	-11.25				55.56	-5.75	-6.75	-6.75	-6.5	-7.25	-6.25	-6.5	-7	-6.25
		55.6	-11.25	-10.75	-10.5	-11	-11	-11	-11	-11	-11.75				55.6	-6.5	-6.25	-6.25	-7	-6.75	-6.25	-6.75	-6.5	-6
		55.64	-11.5	-10.75	-10.25	-10.75	-10.5	-11	-11.25	-11	-12				55.64	-6.75	-6	-6	-6.75	-6.25	-6.5	-6.75	-6.25	-6.75
		55.68	-11.25	-10.5	-10.5	-11	-10.75	-10.75	-11.5	-10.75	-11.75				55.68	-6.5	-5.75	-6.25	-6.75	-6.75	-6.5	-7	-6.25	-7
		55.72	-11.25	-11.25	-10.5	-10.5	-11	-11	-12	-10.75	-11.25				55.72	-6.75	-6.25	-6.5	-6	-7	-6.75	-7	-6.75	-6.5
		55.76	-11	-11.25	-11.25	-10.25	-11.25	-11.25	-11.75	-11.75	-11				55.76	-7.25	-6.5	-6.75	-6	-6.5	-6.75	-6.75	-6.75	-6.25
		55.8	-10.5	-11.5	-11.5	-10.25	-11.5	-11.5	-11.25	-12	-10.75				55.8	-6.75	-6.75	-6.5	-6.25	-6.5	-6.75	-6.5	-6.75	-6.25
		55.84	-10.25	-11.5	-11.25	-10.5	-11.25	-11.5	-11.25	-11	-11.5				55.84	-6.5	-6.5	-6.5	-6.5	-6.75	-6.75	-6.5	-6.5	-6.5
		55.88	-10.5	-11	-11	-11	-11.25	-11.5	-11	-11	-11				55.88	-6.25	-6.25	-6.25	-6.75	-7	-7	-6.5	-6.75	-6.25
		55.92	-10.5	-11.25	-10.5	-11.5	-11	-11.25	-11.25	-10.5	-11				55.92	-6.25	-6.5	-6	-7	-7	-6.75	-6.25	-6.25	-7
		55.96	-10.75	-11	-10	-11.5	-10.75	-11.75	-11.75	-10.75	-11.5				55.96	-6	-6.75	-6.25	-7.25	-7.25	-6.75	-6.5	-6.5	-7.5
		56	-11	-10.75	-11	-11.25	-10	-11.75	-12	-10.75	-12				56	-6.25	-6.75	-7	-6.75	-6.5	-6.5	-7	-6.75	-7.5
		56.04	-11	-10.25	-11.5	-11	-10.25	-11.5	-11.5	-11	-11.75				56.04	-6.5	-6.25	-7.25	-6.25	-6	-6.75	-7	-7.5	-7.5
		56.08	-10.75	-10.25	-11.5	-10.5	-11.25	-10.5	-11.25	-11.5	-11.5				56.08	-6.25	-6.25	-7	-6	-5.75	-6.5	-6.75	-8	-7
		56.12	-10.25	-11	-11.25	-10.25	-11.25	-10.5	-11.5	-11.5	-11.5				56.12	-6.25	-6.25	-6.75	-6	-6	-6.5	-6.5	-7.25	-6.75
		56.16	-10.25	-11.5	-11	-10.75	-11.25	-10.75	-11.25	-11	-11.5				56.16	-6	-6.25	-6.25	-6.25	-6.25	-6.75	-6.5	-6.25	-6.75
		56.2	-10.75	-11.5	-11	-11.25	-10.75	-11	-11.25	-11.5	-11.5				56.2	-6.25	-6.5	-6.5	-6.5	-6.25	-7	-6.5	-6.5	-7
		56.24	-10.75	-11	-11.25	-11.75	-11	-11.25	-11	-11.75	-11.25				56.24	-6.5	-6.75	-6.5	-7.5	-6.75	-7	-6.5	-7	-6.75
		56.28	-11.25	-10.5	-11.25	-11.5	-11	-12	-11	-11.5	-11.25				56.28	-6.5	-6.75	-6.75	-7.5	-6.75	-7.25	-6.75	-6.5	-7
		56.32	-10.75	-10.75	-11.25	-11.5	-11	-11.25	-11	-11.5	-11.25				56.32	-6.5	-6.5	-7	-7.5	-6.5	-6.5	-6.75	-7	-6.75
		56.36	-10.75	-11.25	-11	-11.25	-11	-11	-11	-11.25	-11				56.36	-6.25	-6.5	-6.75	-7.25	-6.75	-6.25	-6.5	-6.75	-6.75
		56.4	-11	-12	-11	-11	-11.25	-11.25	-10.75	-11.25	-11.25				56.4	-6.75	-7.25	-7	-7.25	-6.75	-6	-6.75	-6.75	-7
		56.44	-10.5	-12	-11	-10.75	-11	-11.5	-11.25	-11.25	-11.5				56.44	-6.5	-7.25	-7.5	-7	-6.5	-6.5	-6.25	-6.5	-6.75
		56.48	-10.75	-11.75	-11.25	-11	-11	-11.5	-11.25	-11	-11.75				56.48	-6.5	-7.25	-7.25	-6.5	-7	-7	-6.5	-6.25	-6.75
		56.52	-10.5	-11.25	-11	-10.25	-11.5	-11	-11.25	-10.75	-11.25				56.52	-6.5	-7.25	-6.75	-6	-7.25	-6.75	-6.25	-6.25	-6.5
		56.56	-10.75	-11.25	-10.75	-10.5	-11.75	-10.5	-11.25	-11	-11.25				56.56	-7	-7	-6.75	-6.5	-7.25	-6.5	-6.5	-6	-6.5
		56.6	-10.5	-11.25	-11	-10.5	-11	-11	-11.5	-11	-11.75				56.6	-6.75	-7	-6.5	-6.5	-6.75	-6.5	-6	-6.5	-7
		56.64	-9.75	-11	-11.25	-11	-10.25	-11.25	-12	-11	-12				56.64	-6.5	-7	-6.5	-7	-6.75	-6.75	-6.75	-7	-7
		56.68	-9.75	-10.75	-11.25	-11	-10.25	-11	-11.5	-11	-11.5				56.68	-6	-6.75	-6.75	-6.5	-6.75	-6.75	-6.75	-7	-6.5
		56.72	-10.5	-10.75	-11.25	-11	-10.25	-11.25	-11	-11.25	-11				56.72	-6	-6.5	-6.75	-6.75	-6.25	-7	-6.75	-7.25	-6
		56.76	-11	-10.75	-11	-11.25	-10.25	-11.5	-11	-11.5	-11				56.76	-6.25	-6.5	-6.5	-7	-6	-6.75	-7	-7	-6.25
		56.8	-10.75	-10.75	-11.25	-11.25	-11	-11.5	-11.75	-11.5	-11.25				56.8	-6.25	-6.25	-6.75	-6.75	-6.5	-6.5	-7.5	-7	-7.25
		56.84	-10.75	-11	-11	-11	-11.25	-11.75	-11.25	-11.5	-11.25				56.84	-6.25	-6.5	-6.75	-6.75	-6.75	-6.75	-7.25	-7.25	-6.75
		56.88	-10.75	-11	-11.25	-11	-11.5	-11.5	-11	-11.25	-11.25				56.88	-6	-6.75	-7	-6.75	-6.75	-7	-7.5	-7	-6.5
		56.92	-10.75	-10.75	-11.25	-10.75	-11.75	-11.25	-10.75	-11.25	-11.25				56.92	-6.25	-6.5	-7	-6.5	-7.5	-7	-7	-7.25	-7
		56.96	-11	-10.5	-11.25	-10.5	-11.5	-11.25	-11.5	-11.25	-11.5				56.96	-6.5	-6.5	-7	-6.5	-7.25	-7	-7	-6.75	-7.25
		57	-10.75	-10.75	-11	-10.25	-11.75	-11.25	-11.25	-11	-11				57	-6.5	-6.75	-7	-6.25	-7	-6.5	-6.75	-6.5	-6.5
		57.04	-10.5	-10.5	-10.5	-10.75	-11.5	-11.25	-11	-11	-11				57.04	-6.5	-6.25	-6.75	-6	-6.75	-6.5	-6.5	-7	-6.25
		57.08	-11	-10.75	-10.5	-11.75	-11.5	-11.25	-10.75	-11	-11				57.08	-6.5	-6	-6.5	-6.75	-6.5	-7	-6.25	-6.75	-6
		57.12	-10.5	-10.75	-10.75	-11.5	-11.5	-10.75	-11	-10.75	-10.5				57.12	-6.5	-6.5	-6.25	-7.25	-6.5	-6.75	-6.5	-7.25	-5.75
		57.16	-10.5	-11	-11	-11.25	-10.75	-10.75	-11.25	-11	-10.5				57.16	-6.25	-6.5	-7	-7	-6.25	-6.5	-6.75	-7.25	-6.25
		57.2	-10.75	-10.5	-11	-11.25	-10.5	-10.5	-11.25	-11.5	-11				57.2	-6.5	-6.25	-7.25	-6.5	-6	-6.5	-7	-7.25	-6.75
		57.24	-11.25	-10.75	-11	-11.25	-10.5	-10.5	-11	-11.75	-11.25				57.24	-6.75	-6	-6.75	-6.75	-6	-6.5	-7	-7.5	-6.75
		57.28	-11.25	-11	-11.25	-10.75	-10.75	-11	-10.75	-11.75	-11.5				57.28	-6.25	-6.25	-6.75	-6.25	-6.25	-6.75	-6.75	-7.25	-7
		57.32	-11	-11	-11	-10.5	-11.25	-11.5	-11.25	-12	-11.25				57.32	-6	-6.25	-6.5	-6.25	-7.5	-7	-6.75	-7	-7.25
		57.36	-10.5	-11	-11	-10.5	-11.5	-11.75	-11.25	-11.75	-10.75				57.36	-6.25	-6	-6.5	-6.25	-7.75	-6.75	-6.5	-6.25	-7
		57.4	-10.5	-10.75	-10.5	-10.75	-11.5	-11.25	-11.25	-11.5	-10.75				57.4	-6.5	-6	-6.5	-6.5	-7.5	-6.5	-6.5	-6.25	-6.5
		57.44	-10.5	-10.5	-10.25	-11	-11	-11	-11.25	-11.5	-11.25				57.44	-6.5	-6.25	-6	-7	-7	-6.5	-6.75	-6.75	-6.5
		57.48	-10.75	-10.5	-10.25	-10.75	-10.75	-11	-11.25	-11.25	-11				57.48	-6	-6.75	-5.75	-7	-6.75	-6.5	-6.5	-6.75	-6.75
		57.52	-10.5	-10.75	-11	-10.75	-10.5	-11	-11.5	-11.5	-11.25				57.52	-5.5	-6.75	-6	-7.25	-6.5	-6.75	-6.5	-6.5	-6.25
		57.56	-10.5	-11	-11.25	-10	-11	-11	-11.5	-11.25	-11				57.56	-6	-6.75	-6	-6.5	-6.75	-6.75	-6.75	-6.75	-6.5
		57.6	-10.5	-10.75	-11.25	-10.75	-11	-11	-11	-10.25	-11.25				57.6	-6	-6	-6.25	-6	-6.5	-6.5	-6.25	-6.25	-6.75
		57.64	-10	-10.25	-10.75	-11	-11.25	-11.25	-10.5	-10.25	-11.5				57.64	-5.75	-6.25	-6.25	-6.5	-6.25	-6.5	-5.75	-6	-6.5
		57.68	-10.25	-10.25	-10.5	-11.5	-11.5	-11.5	-10.75	-10.75	-11.75				57.68	-5.75	-6.75	-6.5	-7	-6.25	-6.75	-5.75	-6.25	-6.5
		57.72	-10.5	-10.75	-11	-11.75	-11.75	-11.5	-11.5	-11.5	-11.25				57.72	-6.5	-7.25	-6.5	-7	-6.25	-7	-6.5	-6.5	-7
		57.76	-11	-11.25	-11	-11.25	-12	-10.75	-11.25	-11.25	-11				57.76	-6.75	-7.25	-6.75	-6.75	-7	-6.5	-6.75	-6.5	-7
		57.8	-11	-11.25	-10.75	-10.75	-11.75	-10.75	-11	-11.25	-11				57.8	-7.25	-6.75	-6.5	-6.25	-7	-6.25	-7	-6.75	-6.75
		57.84	-11	-11	-11	-10.75	-11.25	-10.75	-11.25	-11.25	-11.25				57.84	-6.75	-6.5	-6.5	-6.25	-6.5	-6.5	-7	-6.75	-7
		57.88	-10.75	-10.75	-11	-10.75	-10.75	-11.25	-11.5	-11.75	-11.25				57.88	-6.25	-7	-6.5	-6.5	-6.25	-7.25	-6.75	-6.75	-6.75
		57.92	-10.5	-10.75	-10.75	-11.25	-11	-11	-11.5	-11.75	-11.5				57.92	-6	-6.5	-6.5	-7	-6.5	-7	-7	-7	-6.75
		57.96	-10.5	-11	-10.5	-11.5	-11.5	-11.25	-10.75	-11	-11.5				57.96	-6.25	-6.25	-6	-7.25	-7	-7	-6.75	-6.75	-6.75
		58	-10.75	-11	-10.5	-11.25	-11	-11.25	-10.5	-11	-11.75				58	-6.5	-6.5	-6.25	-7.25	-7	-6.75	-6.5	-6.5	-7.25
		58.04	-10.5	-11.25	-10.75	-11	-10.75	-11.25	-10.75	-11.25	-11				58.04	-6.5	-6.5	-6.25	-6.5	-6.75	-6.75	-6.75	-6.25	-6.75
		58.08	-10.25	-11	-10.75	-11.25	-10.75	-11.5	-11	-11.5	-11				58.08	-6	-6	-6.75	-6.25	-6.5	-7	-6.75	-6.75	-6.75
		58.12	-10.75	-11	-10.25	-11.25	-11.25	-11.75	-11.25	-11	-11.25				58.12	-6.25	-6.5	-6.25	-6.5	-7	-7	-6.75	-7	-7
		58.16	-10.75	-11	-10.5	-11	-11.75	-12	-11.25	-10.25	-11				58.16	-6.25	-6.75	-6.5	-6.25	-6.75	-7	-6.75	-6.5	-6.25
		58.2	-10.5	-10.75	-10.75	-11.25	-11.75	-11.25	-11	-10.5	-11				58.2	-6.25	-6.75	-6.5	-6.5	-6.5	-7	-7	-6.5	-5.75
		58.24	-10.5	-11	-11	-11	-11.25	-10.25	-10.75	-10.5	-11				58.24	-6.25	-6.5	-6	-6.75	-6.75	-6.25	-6.5	-6.25	-6
		58.28	-10.75	-10.75	-11.75	-10.5	-11	-10	-11	-11	-10.5				58.28	-6	-6.25	-6.5	-6.5	-6.75	-5.75	-6.5	-6.5	-6.25
		58.32	-10.75	-10.75	-11	-10.5	-10.75	-10.5	-10.75	-11.5	-10.75				58.32	-6	-6.5	-6.5	-6.5	-6.75	-6.25	-6.5	-6.5	-6.75
		58.36	-11	-11	-10.5	-10.5	-10.75	-11.25	-11	-11.75	-11.25				58.36	-6.5	-6.5	-6	-6.5	-6.5	-6.75	-6.5	-6.5	-7.25
		58.4	-11	-10.75	-9.75	-11	-11	-11.25	-10.75	-11.25	-11.5				58.4	-6.5	-6.25	-5.75	-7	-6	-6.5	-6.5	-6.5	-7.25
		58.44	-10.5	-10.5	-10.25	-11.25	-10.75	-11.25	-11.5	-11.25	-11.25				58.44	-6.25	-6	-6.25	-7	-5.75	-6.5	-6.75	-7	-7.25
		58.48	-10	-10.75	-11.5	-11.25	-10.5	-10.75	-11	-11.25	-11				58.48	-6	-6.25	-6.75	-7	-6	-6.5	-6.25	-6.75	-7
		58.52	-10.5	-11.25	-11.75	-11.25	-10.5	-10.5	-11.5	-10.75	-11				58.52	-6.5	-6.75	-7.25	-7	-6	-6.25	-6.75	-6	-6.75
		58.56	-11	-11.5	-11.5	-11.25	-10.75	-10.75	-11.25	-10.5	-10.25				58.56	-7	-7.25	-7.25	-7	-6.25	-6.25	-6.75	-6.25	-6.5
		58.6	-10.75	-11.75	-10.75	-11	-11	-10.75	-11	-10.5	-10.25				58.6	-6.5	-7.75	-7	-6.75	-6.25	-6.75	-6.5	-6.5	-6.5
		58.64	-10.75	-11.25	-10.75	-10.75	-11	-11	-11	-10.5	-10.5				58.64	-6	-7.25	-6.5	-6.75	-6.25	-6.75	-6.75	-6.5	-6.25
		58.68	-11	-10.75	-10.75	-10.25	-11	-11.5	-11	-10.5	-10.25				58.68	-6.75	-6.5	-6.25	-6.25	-6.75	-7	-7	-6	-5.75
		58.72	-10.75	-10.75	-10.75	-10.25	-10.5	-12	-11.5	-10.25	-10.25				58.72	-7	-6.5	-6.5	-6.25	-6.25	-6.75	-7	-6	-6.25
		58.76	-11	-11	-11	-10.75	-10.5	-11.5	-11.5	-10.5	-10.75				58.76	-7.25	-6.75	-6.75	-6.5	-6.5	-6.25	-6.75	-6.5	-6.5
		58.8	-11	-11.25	-11.25	-10.75	-10.5	-11	-10.75	-10.25	-11.25				58.8	-6.75	-6.75	-7	-6	-6.25	-6	-6.25	-6.75	-6.75
		58.84	-11	-10.25	-11	-11	-10.5	-10.75	-10.5	-10.75	-12				58.84	-6.5	-5.75	-6.75	-5.75	-6.5	-6.25	-6	-6.75	-7
		58.88	-10.5	-10.5	-10.75	-11.25	-10.75	-10.5	-10.5	-11	-12.25				58.88	-6.25	-6	-6.25	-6.5	-6.5	-6.5	-6.25	-6.75	-7.25
		58.92	-10.25	-10.5	-10.5	-10.75	-11	-10.75	-10.75	-11.5	-12				58.92	-6.5	-6.25	-5.75	-6.5	-6.25	-7	-6.25	-7.25	-7.25
		58.96	-10.5	-10.25	-10.25	-10.75	-10.75	-11	-10.75	-11.75	-11.25				58.96	-6.5	-6	-6.25	-6.25	-6	-7	-6.5	-7.5	-7.25
		59	-10.25	-11	-10	-10.75	-10.75	-10.75	-10.75	-12	-11.25				59	-6.25	-6.5	-6.5	-6	-6.5	-6.75	-7	-7.25	-7.25
		59.04	-10	-11.25	-10	-10.25	-10.75	-10.75	-10.75	-11.5	-11.5				59.04	-6	-6.5	-6	-5.5	-7	-6.5	-6.5	-7	-7.25
		59.08	-10.25	-10.75	-10	-10.5	-11	-10.75	-11	-11	-11				59.08	-6.25	-6.25	-5.5	-6	-6.75	-6.25	-6.25	-6.75	-6.75
		59.12	-10.5	-10.5	-10.75	-10.5	-11	-11	-11	-11.5	-11.25				59.12	-6	-6	-6	-6.25	-6.5	-6	-6	-6.5	-6.5
		59.16	-10.75	-10.25	-11	-10	-10.5	-11.5	-11.75	-11.25	-11				59.16	-6.25	-5.75	-6.25	-6	-6.25	-6.5	-6.5	-6.25	-7
		59.2	-10.5	-10.25	-10.75	-10.5	-10.5	-11.25	-12	-11.5	-11				59.2	-6.25	-6	-6	-6.5	-6.25	-6.75	-6.75	-6.75	-6.5
		59.24	-10.25	-10.25	-10.75	-11	-10.75	-10.5	-11.25	-11.5	-11.25				59.24	-5.75	-6	-6.25	-6.75	-6	-6.5	-6.5	-6.5	-6.5
		59.28	-11	-10.75	-10.75	-11	-10.75	-10.5	-11	-11.5	-11.5				59.28	-6.5	-6.5	-6.5	-6.25	-6	-7	-6.5	-6.5	-6.75
		59.32	-10.75	-11	-10.5	-10.75	-10.75	-10.25	-10.75	-11	-11.75				59.32	-6.25	-6.5	-6.5	-6.25	-6.5	-6.75	-6.5	-6.5	-7
		59.36	-10.25	-10.75	-10.75	-10.5	-10.75	-11	-11	-11.5	-11.75				59.36	-5.75	-6.5	-6.75	-6.25	-7.25	-6.75	-7	-7.25	-6.75
		59.4	-10	-10.25	-11.25	-10.5	-11.25	-11.25	-11.25	-12.25	-11.5				59.4	-5.5	-6.25	-7	-6	-7.5	-7	-6.75	-7	-7.25
		59.44	-10	-10.5	-12	-10.75	-11.25	-11.75	-11.5	-12.25	-11.5				59.44	-5.25	-6.25	-7	-6.25	-6.5	-6.75	-6.75	-6.75	-7.5
		59.48	-10.25	-10.75	-11.5	-11	-11.75	-11.75	-11.5	-11.75	-11				59.48	-5.75	-6.5	-6.75	-6.75	-6.5	-6.75	-6.75	-7	-7
		59.52	-10.5	-11	-11.5	-11.75	-11.25	-11.5	-11.75	-11	-10.75				59.52	-5.75	-6.5	-6.75	-7.25	-6.5	-6.5	-6.75	-6.75	-6.75
		59.56	-10.75	-10.75	-11.25	-11.25	-11.75	-11.25	-11.5	-11	-11				59.56	-6.25	-6.25	-6.5	-6.75	-6.75	-6.5	-7	-6.5	-6.75
		59.6	-10.75	-11	-11	-10.5	-11.75	-10.75	-11.75	-10.5	-11				59.6	-6.5	-6.25	-6	-6.5	-7	-5.75	-7.5	-6.75	-6.75
		59.64	-10.5	-10.5	-10.75	-10.75	-11.25	-10.5	-12	-10.25	-11				59.64	-6.25	-6.25	-6	-7	-6.5	-6.25	-7.5	-6.75	-7
		59.68	-10.75	-10.25	-11	-10.75	-11.25	-11.25	-11.75	-10.5	-11.25				59.68	-6.5	-5.75	-6.25	-6.5	-6.5	-6.5	-7.75	-6.75	-7.25
		59.72	-11	-10.5	-10.5	-10.75	-11.25	-11.75	-11.5	-10.75	-10.75				59.72	-6.25	-6	-6.5	-6.5	-6.75	-6.75	-7.25	-7	-6
		59.76	-10.75	-11	-10.75	-10.75	-11.25	-11.25	-10.75	-11	-10.75				59.76	-6.25	-6.5	-7.25	-6.5	-6.75	-6.25	-6.5	-7	-5.75
		59.8	-10.5	-11	-11	-10.75	-11.25	-11.25	-10.5	-11	-11				59.8	-6.5	-6.25	-7.25	-6.25	-6.5	-6.5	-6.25	-6.5	-5.75
		59.84	-11	-11.25	-11	-11.25	-11.5	-11	-10.5	-10.75	-11.25				59.84	-6.75	-6.5	-7	-6.25	-6.5	-6.75	-6	-6	-6.25
		59.88	-10.75	-11	-11	-11.5	-11.5	-11.25	-10.75	-10.5	-11.25				59.88	-6.25	-6.75	-6.5	-6.75	-6.25	-6.75	-6	-6	-6.5
		59.92	-11	-11.5	-11.25	-11.25	-11	-11.25	-10.5	-10.75	-10.75				59.92	-6.25	-6.75	-6.5	-6.75	-6.25	-6.75	-6.25	-6	-6.75
		59.96	-11.25	-11.25	-11	-10.75	-10.75	-11	-11	-11	-10.25				59.96	-6.25	-6.5	-6.5	-6.25	-6.5	-6.5	-6.75	-6	-6
		60	-11.25	-10.75	-11.25	-10.5	-10.5	-10.25	-11	-10.75	-10.5				60	-6.75	-6.25	-6.25	-5.75	-6.75	-6	-6.25	-6.5	-6.25
		60.04	-11.5	-10.75	-11	-10.75	-10.25	-10.75	-11.25	-11	-10.5				60.04	-7	-6	-6.5	-6.25	-6.5	-6.5	-6.25	-6.5	-6.25
		60.08	-10.75	-10.75	-10.75	-11	-10.5	-10.75	-11	-11.75	-11				60.08	-6.5	-6	-6.75	-6.5	-6	-6.75	-6.5	-6.75	-6
		60.12	-10.25	-9.75	-10.75	-11	-11	-11	-10.75	-11.25	-11.5				60.12	-6	-5.5	-6.75	-6	-6.25	-6.5	-6.25	-7.25	-6.25
		60.16	-10.25	-10.25	-10.75	-10.75	-11.25	-11	-10.75	-11.5	-11.5				60.16	-6	-5.75	-6	-6.25	-6.75	-6.25	-6.25	-7.5	-7
		60.2	-9.75	-10.5	-10.75	-11	-10.75	-11	-11	-11	-11				60.2	-5.75	-6.25	-6.5	-6.75	-6.75	-6.25	-6	-7.25	-6.75
		60.24	-9.75	-10.25	-11	-10.75	-10.25	-11.25	-11.25	-11	-11				60.24	-5.75	-6.5	-7	-6.75	-6.5	-6.25	-6.5	-6.75	-6.25
		60.28	-10.25	-10.25	-10.75	-11	-10.5	-11.25	-11.5	-10.5	-11.5				60.28	-5.75	-6.25	-6.75	-6.5	-6.75	-6.25	-7	-5.75	-6.75
		60.32	-10.75	-10.75	-11	-10.5	-11	-11.5	-11.25	-10.5	-12				60.32	-6	-6.25	-6.5	-6.25	-7	-6	-6.75	-5.75	-7.25
		60.36	-11	-10.75	-11	-10.75	-11.5	-11.5	-11	-10.75	-12				60.36	-6	-6.25	-6.25	-6.75	-7	-6.5	-6.5	-6.25	-6.75
		60.4	-11	-10.75	-10.75	-11.5	-11.75	-11.5	-10.75	-11.5	-11.5				60.4	-6.5	-6	-6.25	-7.25	-6.75	-6.25	-6.25	-6.75	-7
		60.44	-11	-10.5	-11	-11	-11.5	-10.75	-11.25	-11.75	-10.75				60.44	-6.75	-6	-6.5	-7	-6.5	-6.25	-6.25	-7.25	-6.5
		60.48	-10.75	-10.5	-10.5	-10.5	-10.75	-10.75	-11.75	-11.25	-10.75				60.48	-6.5	-6.25	-6.25	-6.75	-6.25	-6.25	-7	-6.75	-6.25
		60.52	-10.25	-10.75	-10.5	-11	-11	-11	-11.5	-11.25	-11				60.52	-6	-6.5	-6.25	-6.75	-6.5	-6.5	-7	-6.75	-6.5
		60.56	-10.25	-10.25	-10.75	-11	-11	-10.75	-11.25	-10.75	-11.25				60.56	-6.25	-6	-6.25	-6.25	-6.5	-6.5	-6.75	-6.75	-6.5
		60.6	-10.25	-10	-10.75	-10.25	-10.75	-10.5	-11	-10.75	-11.5				60.6	-6.5	-6	-6	-5.75	-6.75	-6.25	-6.5	-6.25	-6.5
		60.64	-10	-10.25	-11	-10	-11.5	-10.25	-10.5	-10.75	-12.25				60.64	-6.25	-6.25	-6.25	-5.5	-6.5	-6	-6	-6.25	-7.25
		60.68	-10	-10.75	-11.25	-10.25	-11.5	-10.5	-10.25	-11	-12				60.68	-5.75	-6.25	-6.5	-5.5	-6.5	-6.25	-5.75	-6.5	-7.25
		60.72	-10.5	-10.25	-11.25	-10.75	-11	-10.75	-10.25	-11	-11.75				60.72	-5.75	-6	-6.75	-6.5	-6.75	-5.75	-6	-6.75	-7
		60.76	-10.5	-10	-10.75	-10.5	-10.75	-11.25	-10.5	-11.25	-11				60.76	-6	-6	-6.75	-6.5	-6.75	-5.75	-6.25	-7	-6
		60.8	-10.5	-10.75	-10.75	-10.75	-10.75	-11.25	-11	-11	-11				60.8	-6.5	-6	-6.25	-6.25	-6.75	-6	-6.25	-6.5	-6.25
		60.84	-11	-11.25	-10.5	-11.5	-10.5	-11	-11	-11	-11.5				60.84	-7	-6.25	-6	-6.75	-6.25	-6	-6.25	-5.75	-6.75
		60.88	-10.75	-11	-10.5	-11.25	-10.5	-11.25	-11	-11.25	-11.5				60.88	-6.5	-6.25	-5.75	-6.5	-6	-6.25	-6.75	-6.25	-6.75
		60.92	-10.5	-11	-10.5	-11.25	-10.75	-11.5	-11	-11	-11.25				60.92	-5.75	-6.5	-6	-7	-6.25	-6.75	-6.75	-6	-6.75
		60.96	-10.25	-11.5	-10.75	-11.5	-10.75	-11.25	-11.25	-11.5	-11				60.96	-5.75	-7.5	-6.5	-7.5	-6.25	-7.25	-7	-6.5	-6.75
		61	-10.5	-11.25	-10.75	-11	-10.5	-11	-11	-11.25	-10.5				61	-6.25	-7.25	-6.5	-7	-6.25	-7	-6.5	-6.5	-6.5
		61.04	-10.75	-10.25	-10.5	-11	-10.5	-11	-10.5	-11.75	-10.5				61.04	-6.5	-6.25	-6.25	-7	-6.25	-7.25	-6.25	-7	-6.5
		61.08	-11	-10.25	-10.75	-11.25	-10.5	-11	-10.75	-11.5	-11.25				61.08	-7	-6.5	-6	-6.75	-6.25	-7	-6.25	-7	-6.75
		61.12	-11	-10.75	-11.25	-11.25	-10.5	-10.5	-10.75	-10.5	-11.5				61.12	-7.25	-6.75	-6.5	-6.5	-5.75	-6.5	-6	-6.75	-6.75
		61.16	-10.75	-10.75	-11.5	-11.25	-10.5	-10.75	-11.25	-10.25	-11.75				61.16	-6.75	-6.5	-7.25	-6.25	-6	-6.5	-6.25	-5.75	-7
		61.2	-10.75	-11	-11.25	-11	-11.5	-11	-11.25	-10.25	-11.75				61.2	-7	-6.25	-7.5	-6.25	-6.75	-6.5	-6.5	-5.75	-7
		61.24	-10.75	-10.75	-10.75	-10.5	-11.75	-11.25	-11.25	-11	-10.5				61.24	-6.75	-6	-7	-6.25	-7	-6.25	-6.25	-6.5	-6.5
		61.28	-10.75	-11	-10.75	-10.75	-11.5	-11.25	-11.25	-11	-10.5				61.28	-6.5	-6.25	-6.75	-6	-7	-6.25	-6.75	-6.75	-6.75
		61.32	-10.25	-10.75	-10.5	-11	-11.25	-10.75	-11	-10.75	-10.25				61.32	-5.75	-6.25	-6.5	-6	-6.75	-6.25	-7	-6.25	-6.75
		61.36	-10.25	-10	-10.75	-10.75	-11	-10.75	-11	-10.5	-10.5				61.36	-5.25	-6.25	-6.5	-6.75	-6.5	-6.5	-6.5	-5.75	-6.75
		61.4	-10.5	-10.25	-10.5	-11	-11	-10.75	-11.25	-10.75	-10.5				61.4	-5.5	-6.25	-6.25	-7	-6.75	-6.5	-6.75	-6	-6
		61.44	-10.5	-11	-10	-11	-11	-11	-10.75	-11	-10.75				61.44	-6.25	-6.25	-5.75	-6.75	-6.75	-6.5	-6.25	-6.75	-6.25
		61.48	-11	-11	-10.5	-11	-11.25	-10.75	-11	-10.75	-11.5				61.48	-6.25	-6.25	-5.5	-6.75	-7	-6.5	-6.5	-6.75	-6.75
		61.52	-10.75	-10.75	-11	-10.75	-11.25	-11	-11.25	-10.75	-11.75				61.52	-6	-6.25	-6	-6.75	-7.25	-6.25	-7	-6.5	-7
		61.56	-10.5	-10.75	-11.25	-10.5	-10.75	-11.5	-11.5	-11.25	-12				61.56	-6	-6.25	-6.5	-7	-6.5	-6.5	-7.25	-6.5	-7
		61.6	-10.75	-11.25	-11.5	-10.75	-11	-11.25	-11.25	-11.25	-11.5				61.6	-6.5	-6.5	-7	-6.75	-6.75	-6.5	-7.25	-7.25	-7
		61.64	-10.75	-11	-10.5	-10.5	-10.75	-11	-11	-11.25	-11.25				61.64	-6.5	-6.5	-6.5	-6.5	-6.75	-6.5	-6.75	-7.25	-6.75
		61.68	-10.75	-11	-11	-10.5	-10.75	-10.75	-11	-11.25	-11				61.68	-6	-6.5	-6.5	-6.25	-6.5	-6.5	-6.5	-7.5	-6.5
		61.72	-10.25	-10.75	-10.75	-11	-10.75	-10.5	-11	-11.25	-11.25				61.72	-6	-6.5	-6.75	-6.25	-6.5	-6.5	-6.5	-7	-6.75
		61.76	-10.75	-10.25	-10.5	-11	-11	-10.75	-11.5	-10.75	-11.5				61.76	-6.5	-6.25	-6.75	-6	-6.5	-6.5	-6.75	-6.25	-6.75
		61.8	-10.5	-10	-10.5	-10.75	-11	-11.25	-11.25	-10.75	-11.5				61.8	-6.25	-6	-6.75	-5.75	-6.5	-6.75	-6.75	-5.75	-6.5
		61.84	-10.5	-10.25	-10.5	-10.75	-11.25	-11.25	-10.5	-11.25	-11.5				61.84	-6	-6.25	-6.25	-6.25	-6.5	-7	-6.75	-5.75	-7
		61.88	-10.25	-10.25	-10.5	-10.5	-11.25	-11.25	-11	-11.75	-11.5				61.88	-6.25	-6.25	-5.75	-6.5	-6.25	-7	-7	-6.5	-7.25
		61.92	-10	-10.25	-10.75	-10.25	-11.5	-10.75	-11.25	-11.5	-11.75				61.92	-6.25	-6.5	-6.25	-6.25	-6.25	-6.75	-6.75	-6.75	-7.5
		61.96	-10	-11	-11	-9.75	-11	-10.75	-11.25	-11.25	-11.25				61.96	-6.5	-6.5	-6.5	-6.25	-6	-6.5	-6.5	-7.25	-7.25
		62	-10	-11.5	-11	-10.5	-10.5	-11	-11.25	-11.25	-10.75				62	-6	-6.75	-6.75	-6.25	-5.75	-7.25	-6.25	-7.25	-6.5
		62.04	-10.25	-11.5	-11.25	-11.25	-10.75	-11	-11.75	-11.25	-11				62.04	-5.75	-6.5	-6.75	-6.75	-6	-7	-6.25	-7	-6.25
		62.08	-10.5	-11.25	-11.5	-11.5	-11	-10.75	-11.5	-11.25	-11.25				62.08	-6	-6.5	-6.75	-6.75	-6.75	-6.5	-6.5	-6.75	-6.25
		62.12	-10	-10.5	-11.25	-11	-11.25	-10.75	-11	-11.5	-11				62.12	-6	-6.25	-7	-6.75	-7	-6.25	-6.75	-7	-6.25
		62.16	-10	-10.5	-11	-11.25	-11.25	-10.75	-11	-11.5	-11.75				62.16	-6.25	-6.5	-7	-7	-6.75	-6.25	-6.25	-7	-7
		62.2	-10.25	-10.25	-11	-11.25	-11.25	-11.25	-11	-11.5	-12.25				62.2	-6	-6.5	-7	-6.5	-6.75	-6.25	-6	-7	-7.5
		62.24	-10.25	-10.75	-10.75	-10.75	-10.75	-11	-10.75	-10.75	-12				62.24	-6.25	-7	-6.5	-6.25	-6.75	-6	-6	-6.5	-7.25
		62.28	-10.75	-11.25	-11	-10.75	-10.5	-10.5	-10.75	-11	-11.25				62.28	-6.5	-7	-6.75	-6	-6.25	-6.25	-6.75	-6.5	-7
		62.32	-11.25	-11.5	-11	-11	-10.75	-10.75	-10.75	-11	-10.75				62.32	-6.25	-6.75	-6.5	-6.5	-6.25	-6.5	-6.75	-6.75	-7
		62.36	-11.25	-11	-11	-11	-10.75	-11.5	-11	-11.25	-10.75				62.36	-6.25	-6.5	-6.75	-7	-6	-6.5	-7	-7	-6.75
		62.4	-10.75	-10.75	-10.75	-11.25	-10.5	-11.75	-10.75	-11.25	-11				62.4	-6.25	-6.25	-6.75	-7	-6.25	-7	-7	-6.5	-7
		62.44	-10.25	-10.25	-11	-11.75	-10.75	-11.75	-10.75	-10.5	-11				62.44	-6.25	-6.25	-7	-7	-6.75	-7.25	-7	-6.25	-6.75
		62.48	-10.25	-10.5	-11.25	-12	-11	-11.25	-11	-10.5	-10.75				62.48	-5.75	-6.75	-7	-6.75	-6.75	-7	-7	-6	-6.5
		62.52	-10.5	-10.5	-10.75	-11.75	-11.25	-10.75	-11	-10.75	-10.75				62.52	-5.5	-6.5	-6.75	-6.75	-7	-6.75	-6.25	-6.5	-6.25
		62.56	-10.75	-10.75	-10.5	-11.5	-11.25	-10.5	-10.5	-11.25	-11				62.56	-5.75	-6.5	-6	-6.75	-6.75	-6.25	-6	-6.75	-6.5
		62.6	-10.5	-11	-10.5	-11.75	-11.5	-11	-10.25	-11.25	-11.5				62.6	-6.5	-6.25	-6	-7.25	-7	-6	-6	-6.75	-7.25
		62.64	-10.25	-11.25	-10.75	-11	-11.25	-10.75	-10.75	-11.25	-11.25				62.64	-7	-7	-6.25	-7	-7	-6	-6.5	-6.75	-7.25
		62.68	-10	-11	-10.5	-11	-11	-11.5	-10.75	-10.75	-11				62.68	-6.5	-7.25	-6.25	-7.25	-6.5	-6.75	-6.5	-6.5	-7
		62.72	-9.75	-10.5	-10.25	-11.25	-10.25	-12	-11	-11	-11.5				62.72	-5.75	-6.75	-5.5	-7	-6.5	-6.75	-6.75	-6.5	-6.75
		62.76	-10	-10.5	-10.75	-11	-10.25	-12	-11	-11.5	-11.75				62.76	-5.75	-6.5	-6.5	-6.75	-6.75	-6.75	-6.5	-6.5	-7.25
		62.8	-10	-10.5	-11	-11	-10.5	-11	-11.25	-11.25	-11.75				62.8	-6	-6	-7	-6.75	-6.75	-6.75	-6	-6	-7
		62.84	-10.25	-11	-11	-11.25	-10.5	-11	-10.75	-11.25	-11				62.84	-6.25	-6.25	-6.75	-6.75	-6.25	-7	-6	-6	-6.5
		62.88	-10.75	-10.75	-11	-11.25	-10.5	-10.75	-10.75	-11	-11				62.88	-6.25	-6.5	-6.5	-7	-6.25	-6.5	-5.75	-6.5	-6.75
		62.92	-10.75	-10.5	-10.25	-10.75	-11.25	-10.75	-11	-11	-10.75				62.92	-6.5	-6.5	-6	-6.5	-6.25	-6.75	-6.5	-7	-6.75
		62.96	-10.75	-10.75	-10.5	-10.5	-11.5	-10.75	-11	-11	-11				62.96	-6.75	-6.5	-6	-6.25	-6.25	-6.5	-6.5	-7	-6.75
		63	-10.5	-10.75	-10.75	-10.75	-11.75	-10.75	-11.25	-11.25	-11.75				63	-7	-6.5	-6.25	-6.75	-6.5	-6.5	-6.75	-7	-7.25
		63.04	-10.5	-11	-11.25	-10.75	-11	-11	-11.5	-11.5	-12.25				63.04	-6.5	-6.5	-6.75	-7	-6.5	-6.75	-7	-7.25	-7
		63.08	-10.5	-11	-11.25	-10.5	-10.25	-11	-12	-11.75	-12				63.08	-6	-6.5	-7	-6.5	-6.25	-6.75	-6.75	-7.25	-6.75
		63.12	-10.25	-10.75	-11.5	-11	-10.75	-11	-11.75	-11.25	-11.5				63.12	-5.5	-6.5	-7.25	-6	-7	-6.75	-6.75	-6.75	-6.5
		63.16	-10	-11	-11.5	-11	-11.25	-10.75	-11.25	-10.75	-11.25				63.16	-5.5	-7	-6.5	-6.25	-7	-6.5	-6.75	-6.25	-6.75
		63.2	-10.75	-11	-11	-11.25	-11	-10.75	-11	-10.75	-11				63.2	-6.25	-7.25	-6.25	-6.5	-6.75	-6.75	-6.5	-6.5	-6.25
		63.24	-11.25	-11.25	-10.75	-11.25	-11.25	-11	-10.75	-11.25	-11				63.24	-7	-7	-6	-6.25	-6.75	-6.25	-6.5	-7	-6.5
		63.28	-10.75	-11	-10.75	-11	-11	-11	-11	-11.5	-10.25				63.28	-6.25	-6.5	-6.25	-5.75	-7	-6.5	-6.75	-7	-6
		63.32	-10.5	-11	-10.75	-11	-11.5	-11	-11.25	-11	-10.5				63.32	-6.25	-6.25	-6	-6.25	-7.5	-6.5	-6.5	-6.75	-6.25
		63.36	-10.75	-10.75	-11	-10.5	-11	-11.25	-11.5	-11	-11.25				63.36	-6.25	-6	-6	-6.5	-7	-7	-6.25	-6.5	-7
		63.4	-10.75	-10.75	-10.75	-10.25	-11	-10.75	-12	-11.25	-11.5				63.4	-6.25	-6.5	-6.25	-6.75	-6.25	-6.25	-7.25	-6.25	-7.5
		63.44	-10.25	-11	-11	-11.25	-10.75	-10.75	-11.75	-11.25	-11				63.44	-6	-6.75	-6.75	-7.25	-6.25	-6.5	-7.25	-7	-7
		63.48	-10.75	-10.75	-11	-11.5	-10.25	-10.75	-11.75	-11.5	-10.5				63.48	-6.25	-6.75	-6.5	-7.5	-6.25	-6.5	-7	-7	-6.5
		63.52	-10.75	-11	-10.75	-11.25	-10.5	-11	-11.75	-11.75	-10.75				63.52	-5.75	-6.75	-6.25	-7	-6.75	-6.75	-7	-6.75	-6
		63.56	-10.75	-11.5	-10.25	-10.75	-10.5	-11.25	-12	-11.75	-10.25				63.56	-5.75	-7.25	-6.25	-7	-6.5	-6.75	-7.25	-7	-5.5
		63.6	-10.5	-11.5	-10	-10.75	-11	-11.5	-12	-11.25	-10.5				63.6	-6.25	-7.25	-5.75	-6.5	-6.25	-6.25	-6.75	-6.5	-6.5
		63.64	-10.5	-11	-10.5	-10.5	-10.75	-11	-12	-11.5	-11.25				63.64	-6.75	-6.75	-6.25	-6.25	-6.5	-5.25	-7	-6.25	-7
		63.68	-10.5	-10.75	-11	-11	-11	-10.5	-11.5	-11.5	-11.75				63.68	-6.75	-6.5	-6.5	-6.25	-7	-5.5	-7	-6.5	-7
		63.72	-10.5	-10.75	-11.25	-10.75	-11.25	-10.75	-11.25	-11.5	-11.5				63.72	-6.25	-6.5	-6.75	-6.5	-6.75	-6.5	-6.75	-6.5	-6.75
		63.76	-11	-10.75	-11.25	-10.75	-11.5	-11.25	-11	-11.5	-11.5				63.76	-6.25	-6.25	-6.5	-6.25	-6.5	-7.25	-6.25	-6.5	-6.75
		63.8	-11	-10.75	-11.5	-10.75	-11.5	-11.5	-11	-11	-11.25				63.8	-6.75	-6	-6.75	-6.25	-6.75	-7	-6.5	-6.25	-6.75
		63.84	-10.75	-10	-10.75	-11	-11.25	-11.5	-11	-10.5	-11.25				63.84	-6.5	-6.25	-6.25	-6.5	-6.5	-6.75	-6.25	-6	-6.5
		63.88	-10.75	-10	-10.75	-11	-10.75	-10.75	-11.25	-10.5	-10.5				63.88	-6.5	-6	-6.25	-6.75	-6.5	-6.25	-6	-6.25	-6.25
		63.92	-11	-10.75	-10.5	-10.5	-10.5	-10.75	-11	-11	-10.5				63.92	-6.25	-6.75	-6.25	-6.75	-6	-7	-5.75	-6.75	-6.25
		63.96	-10.75	-11	-10.5	-10.25	-10.75	-11.25	-11	-11.5	-11.5				63.96	-6.5	-7	-6.5	-6.75	-6.25	-7.25	-6.25	-7	-6.5
		64	-10.5	-10.5	-10.5	-10.75	-11.5	-11	-11	-11.5	-12				64	-6.75	-6	-6.5	-6.75	-6.75	-6.75	-6.5	-6.25	-6.75
		64.04	-10.75	-10.25	-10.25	-11.25	-11.5	-11.25	-11.25	-11	-12				64.04	-6.75	-5.5	-6.25	-6.75	-6.75	-6.5	-6.75	-5.75	-6.75
		64.08	-11	-10.75	-10.25	-11	-11.25	-11.25	-11	-11	-11.75				64.08	-6.75	-6.25	-6.25	-7	-6.75	-6.5	-6.5	-6.5	-7
		64.12	-10.75	-11.25	-10.5	-11.25	-10.5	-11	-11	-11.5	-11.25				64.12	-6.25	-6.5	-6	-6.75	-6.5	-6.5	-6.75	-7.25	-6.75
		64.16	-10	-11	-11	-11.25	-10.25	-11	-11.25	-11	-11				64.16	-5.75	-6.75	-6.25	-6.5	-6	-6	-6.75	-6.75	-6.5
		64.2	-9.75	-11	-11.25	-11	-11	-11.25	-11	-10.5	-11				64.2	-5.5	-7	-6.75	-6.5	-6	-6.25	-6.5	-6.5	-6.25
		64.24	-10.5	-11	-11	-11.25	-11	-10.5	-10.5	-10.75	-11.25				64.24	-6.25	-6.75	-6.25	-6.75	-6.25	-6.25	-6	-6.5	-6.25
		64.28	-11.25	-10.75	-11.25	-11.5	-11.5	-10	-10	-11.25	-11.25				64.28	-6.75	-6.5	-6.25	-7.25	-6.75	-6.5	-6	-6.5	-6.75
		64.32	-11	-11	-11.25	-11	-11.25	-10.25	-10	-11	-11.25				64.32	-6.75	-6	-6.5	-7	-6.75	-6.5	-6	-6.5	-6.75
		64.36	-11	-11	-11.25	-11	-10.75	-10.75	-10.5	-10.75	-11.25				64.36	-6.25	-6.25	-7	-6.75	-6.5	-6.5	-6.25	-6.5	-6.5
		64.4	-11.25	-11.25	-11	-10.75	-10.75	-10.75	-11.5	-11	-11.75				64.4	-6.5	-6.5	-7	-6.25	-6.5	-6.75	-6.75	-6.5	-6.75
		64.44	-11.25	-11	-10.75	-11.25	-11	-11	-11.25	-11.5	-11.25				64.44	-6.75	-6.5	-6.5	-6.25	-6.75	-6.25	-6.75	-6.5	-6.5
		64.48	-10.75	-10.25	-10.75	-11.75	-11	-11.25	-11.5	-11.75	-11.25				64.48	-7	-6.5	-6.5	-7	-6.75	-6.25	-7	-6.75	-7
		64.52	-10.5	-10.25	-11.25	-11.25	-10.75	-11.75	-11.25	-11.75	-11				64.52	-6.75	-6.5	-6.5	-7	-6.5	-6.5	-6.5	-6.5	-7
		64.56	-11	-10.5	-11.25	-10.75	-11.25	-11.75	-11.25	-11.75	-11.25				64.56	-6.5	-6.5	-6.75	-7	-6.75	-6.75	-6.5	-6.75	-6.75
		64.6	-10.75	-11	-11	-10.75	-11.5	-11	-11.25	-11.25	-11.75				64.6	-6	-6.5	-7	-6.75	-6.75	-6.5	-6.25	-7.25	-6.5
		64.64	-10.75	-11	-10.75	-10.75	-12	-11.25	-11.25	-11.25	-11.75				64.64	-6	-6.5	-7	-6.75	-7	-7	-6.5	-7	-6.5
		64.68	-10.5	-11.25	-10.75	-11.25	-11.5	-11.25	-10.75	-10.75	-12				64.68	-6	-6.75	-6.5	-6.75	-7	-7	-6.25	-6.75	-6.75
		64.72	-10.5	-11.25	-10.75	-11.25	-11	-11.75	-11	-10.5	-11.5				64.72	-6	-6.5	-6.25	-6.75	-7	-6.75	-6.5	-6.5	-6.5
		64.76	-10.75	-11.25	-10.75	-10.75	-10.75	-11.5	-11.25	-11	-11.25				64.76	-6	-6.25	-6	-6.75	-6.75	-6	-6.5	-6.25	-6.25
		64.8	-10.75	-11.5	-11	-11.25	-10.5	-10.75	-11.25	-11.25	-11.25				64.8	-6	-6.25	-6.25	-6.75	-6.5	-6	-6.5	-6.5	-6.25
		64.84	-10.75	-11	-11	-11.5	-10.75	-10.75	-11	-10.75	-11.25				64.84	-6.25	-6.5	-6.25	-6.25	-6	-6.5	-6.25	-6.25	-6.5
		64.88	-10.75	-11	-11.25	-11.5	-11	-11	-11.5	-10.5	-11.5				64.88	-6	-6.75	-6.75	-6.5	-6	-6.75	-6	-6	-7
		64.92	-10.75	-10.75	-11	-11.5	-10.75	-11	-12	-11	-11.75				64.92	-6	-7	-6.75	-7	-5.75	-6.75	-6.75	-6.5	-7.25
		64.96	-10.75	-10.5	-10.5	-11	-10.75	-10.75	-12	-12	-11.5				64.96	-6	-7	-6.25	-6.25	-6	-6.5	-7.25	-7.25	-7.25
		65	-10.5	-10.5	-10.75	-11	-10.5	-11.25	-11.5	-12.5	-11.5				65	-5.75	-6.5	-6.5	-6.25	-6.5	-6.5	-7.25	-7.25	-7
		65.04	-10.75	-10.75	-11	-10.5	-10.75	-11	-11.25	-11.5	-11.75				65.04	-5.5	-6.25	-6.5	-6	-6.5	-6.75	-7	-6.75	-7
		65.08	-11.25	-10.5	-11.5	-10.5	-11	-11.25	-11.25	-10.75	-12				65.08	-6.25	-5.75	-7	-6.5	-6.25	-6.75	-6.75	-6.5	-7.25
		65.12	-11.25	-11	-11.25	-10.5	-10.75	-11.5	-11	-10.75	-11.75				65.12	-6.5	-5.75	-6.75	-6.5	-6	-6.5	-6.25	-6.75	-7.25
		65.16	-10.75	-11.5	-11	-10.5	-11	-11.5	-10.75	-11.5	-11.5				65.16	-6.25	-6.5	-6.5	-6.75	-6.25	-6.75	-6	-6.75	-7
		65.2	-10.5	-11	-10.75	-11	-11	-11.5	-11	-11.25	-11.25				65.2	-6.25	-6.5	-6.25	-6.75	-6.5	-6.75	-6	-6.5	-6.5
		65.24	-10.25	-10.75	-10.75	-11.25	-11.25	-11.25	-11	-11.5	-11.5				65.24	-6.25	-6.75	-6.25	-6.5	-6.75	-6.75	-6	-6.5	-6.75
		65.28	-10.5	-11	-10.75	-10.75	-11.75	-11.5	-11	-11.5	-12.25				65.28	-6	-6.75	-6.5	-6	-7	-6.25	-6.25	-6.25	-7.5
		65.32	-10.75	-11	-10.5	-11.25	-11	-11	-11	-11.5	-12.25				65.32	-5.75	-6	-6.25	-6.5	-6.5	-5.75	-6.25	-6	-7.25
		65.36	-11.25	-10.75	-10.5	-11.5	-11.5	-11	-11	-11.5	-11.5				65.36	-6.5	-5.75	-6.25	-7	-6.25	-5.75	-6.5	-6.75	-6.75
		65.4	-11	-10.75	-10.25	-11	-11.5	-10.75	-10.75	-11.25	-11.5				65.4	-6.75	-5.75	-5.75	-7	-6.75	-6.75	-6.25	-6.75	-7
		65.44	-10.25	-11.25	-10.75	-10.75	-11.5	-10.75	-11.25	-11	-11.25				65.44	-6	-6.25	-6	-6.5	-7	-6.5	-6.5	-6.5	-6.75
		65.48	-10.5	-11	-10.5	-11	-11	-10.75	-11.25	-10.75	-10.75				65.48	-6.25	-6.5	-6	-6.5	-6.75	-5.75	-6	-6.25	-7
		65.52	-10.75	-10.5	-11.25	-10.5	-10.25	-11	-11.25	-11	-11				65.52	-6.5	-6.25	-6.25	-6.5	-6	-6	-7	-6	-6.75
		65.56	-10.75	-10.5	-11	-10.25	-10.75	-11	-11.25	-12	-10.75				65.56	-6.5	-6.5	-6	-6.25	-6	-6.5	-7.25	-6.5	-6.5
		65.6	-10.75	-10.75	-11	-10.5	-11	-11	-11	-11.75	-11				65.6	-6	-7	-6	-6.25	-6.25	-6.75	-7	-6.75	-7
		65.64	-10.5	-10.75	-10.75	-10.5	-11.25	-10.5	-10.75	-11.5	-11.25				65.64	-6	-7	-6.25	-6.25	-6.25	-6.5	-6.25	-6.75	-6.75
		65.68	-10.25	-10.5	-10.5	-10.5	-11	-10.75	-10.75	-11.5	-11.5				65.68	-6	-6.5	-6	-6.25	-6.25	-6.75	-6	-7.25	-6.75
		65.72	-10.25	-11	-10.5	-10.75	-10.75	-11.25	-11.5	-11.5	-11.5				65.72	-6	-6.5	-5.75	-6.75	-6.25	-7	-6.5	-7.25	-6.25
		65.76	-10.5	-11.25	-10.75	-11	-10.75	-11.5	-11.5	-11.25	-11.25				65.76	-6.25	-6.25	-6	-6.75	-6	-7.25	-6.25	-6.75	-6
		65.8	-10.75	-10.75	-11	-10.75	-11	-11.5	-11.25	-11	-10.75				65.8	-6.5	-6.25	-6.75	-6.5	-6.25	-6.75	-6.5	-6.5	-5.75
		65.84	-11	-10.5	-11.5	-11	-11.75	-11.5	-11	-10.75	-11.5				65.84	-6.5	-6.25	-7	-6.25	-7	-7	-6.75	-6	-6.5
		65.88	-11	-10.75	-11.5	-11	-11	-11.25	-11	-11	-12				65.88	-6.25	-6.25	-7	-6	-7.25	-7.25	-6.75	-5.5	-7.25
		65.92	-10.25	-11	-11.25	-11.25	-10.75	-11.5	-10.75	-11.25	-12				65.92	-6.25	-6.75	-7.25	-6.5	-7.25	-7.25	-6.5	-6	-7.25
		65.96	-10.25	-11.5	-11.5	-11.5	-11	-11.25	-10.75	-11.25	-11.75				65.96	-6	-6.75	-7	-6.75	-6.75	-7	-6.75	-6.75	-7.25
		66	-10.75	-11.5	-11.25	-12	-11.25	-11.25	-10.75	-11.5	-11.5				66	-5.75	-7	-6.25	-6.75	-6.5	-6.5	-6.25	-6.75	-7
		66.04	-11	-11.25	-10.75	-11.75	-11.75	-11.75	-11	-11.5	-11				66.04	-5.75	-6	-5.75	-6.75	-6.5	-6.75	-6	-6.5	-6.25
		66.08	-10.5	-10.75	-10.25	-11.5	-11.5	-11.25	-11.25	-12	-11				66.08	-6.25	-5.75	-6.25	-6.75	-6.5	-6.5	-5.75	-6.5	-6.5
		66.12	-10.75	-10.5	-9.75	-11	-11.75	-11.25	-11.25	-11.75	-11				66.12	-6	-5.5	-6.25	-6.5	-6.75	-6.5	-6	-6.75	-6.25
		66.16	-10.75	-10.75	-10.75	-11.25	-11.5	-11.25	-11.25	-11.75	-11				66.16	-6.25	-6.25	-6.75	-7	-6.75	-6.25	-6.75	-7	-6.5
		66.2	-11.25	-10.75	-11	-11	-10.75	-11.25	-11.5	-11.5	-11.25				66.2	-6.25	-6.25	-6.75	-6.75	-6	-6	-6.75	-6.5	-6.75
		66.24	-11.5	-10.75	-10.75	-11	-11.25	-10.75	-12	-11.25	-11.25				66.24	-6.25	-5.75	-6.5	-7	-6.25	-5.5	-7	-6	-6.75
		66.28	-11	-11	-11	-11	-11.5	-10.5	-11.75	-11	-11.25				66.28	-6.25	-6	-6.5	-6.75	-6.75	-5.75	-7.25	-6.5	-6.75
		66.32	-10.75	-11.5	-11.5	-11	-11	-10.75	-11.5	-10.5	-11.25				66.32	-6.75	-6.25	-6.5	-6.5	-6.25	-6.5	-6.75	-6.75	-6.5
		66.36	-11	-11.5	-11.5	-11.25	-11	-10.5	-11.25	-10.75	-11.25				66.36	-7	-6	-6.75	-6.5	-6	-6	-6.25	-7.25	-6.75
		66.4	-11.25	-11.25	-11	-11.5	-11.25	-11	-10.5	-11.25	-11.25				66.4	-7.25	-6.5	-6.75	-6.5	-6	-6.5	-5.75	-7.25	-7
		66.44	-11.25	-11.25	-11.25	-11	-11.25	-11.25	-10.75	-11.25	-11.5				66.44	-7.25	-7.25	-7	-6.25	-6.25	-6.75	-6.5	-7	-7
		66.48	-11	-11	-11	-10.5	-11	-11	-11.75	-11	-11.5				66.48	-6.25	-6.75	-7	-6.25	-6.5	-6.5	-6.75	-6.75	-6.75
		66.52	-10.75	-10.75	-10.75	-10.75	-11.25	-11	-11.75	-11	-11.25				66.52	-5.5	-6	-6.75	-6	-6.5	-6.25	-6.75	-7	-6.75
		66.56	-10.75	-11	-11	-11.25	-11	-10.75	-11.5	-11	-11.5				66.56	-6	-6.25	-6	-6.25	-5.75	-6	-6.25	-6.75	-6.75
		66.6	-11	-11.25	-11.5	-11	-11	-10.75	-11.25	-11.5	-11.5				66.6	-6	-6.75	-6	-6.75	-5.75	-6.25	-6.25	-7	-6.75
		66.64	-10.5	-11.25	-11.75	-10.75	-10.75	-11	-11	-11.75	-12				66.64	-5.75	-6.75	-6.5	-6.75	-6	-6.5	-6.25	-7	-7
		66.68	-10.25	-10.75	-11	-10.75	-10.5	-10.75	-11	-11.25	-11.75				66.68	-5.25	-6.5	-6	-6.75	-6.5	-6.5	-5.75	-6.75	-6.75
		66.72	-10.5	-11	-11.25	-10.75	-11	-10.75	-11.5	-11.5	-11.5				66.72	-6	-6.75	-6	-6.5	-7	-6.25	-6.25	-6.5	-7.25
		66.76	-11	-10.75	-11	-11	-11.25	-11.5	-11.25	-11.25	-11				66.76	-6.75	-6	-5.75	-6.75	-7	-6.5	-6.25	-6	-6.75
		66.8	-11.25	-11	-10.5	-11.25	-11	-11.75	-11.25	-11.25	-11				66.8	-6.75	-6.25	-5.75	-6.75	-6.25	-6.75	-6.25	-6.5	-6.5
		66.84	-10.75	-11.25	-10.5	-11.25	-11.25	-11	-11.25	-11.25	-11				66.84	-6	-6.5	-6.5	-6.75	-6.25	-6.75	-6.5	-6.75	-6.5
		66.88	-10.5	-11	-11.25	-10.75	-11.25	-10.5	-11.25	-11.25	-11.25				66.88	-6	-6.5	-7.25	-6.25	-6.75	-6.75	-6.25	-6.75	-6.75
		66.92	-11.25	-10.75	-11.5	-11	-11.5	-11	-11.75	-11	-11.5				66.92	-6.75	-6.75	-7.25	-6.5	-7.5	-6.75	-6.75	-6.5	-7.25
		66.96	-11.5	-11	-11.25	-11	-11.25	-10.75	-12	-10.75	-11.75				66.96	-7.25	-6.75	-7	-7	-7.25	-6.5	-7	-6	-7.25
		67	-11	-11.25	-11.5	-11	-11	-11	-12	-11	-12.25				67	-7.25	-7	-7.5	-7	-6.75	-6.5	-7.5	-6.25	-6.75
		67.04	-11.25	-11	-11.5	-11.25	-11	-11.25	-12	-11.25	-12.5				67.04	-7.25	-6.75	-7	-6.75	-6.25	-6.5	-7.75	-6.5	-6.5
		67.08	-11.5	-10.75	-10.75	-11.75	-11.5	-11.75	-12	-11.75	-12				67.08	-6.75	-6.5	-6	-7.25	-6.75	-6.75	-7.75	-6.75	-6.75
		67.12	-11	-11	-10.75	-11.75	-11.25	-12	-11.5	-12	-11.5				67.12	-6.5	-6.25	-6.25	-7.5	-6.5	-6.75	-7	-7	-6.5
		67.16	-11	-11	-11	-11.5	-10.75	-12	-11	-11.75	-11.25				67.16	-6	-6.5	-7	-7.75	-6	-7	-6.5	-6.75	-6.25
		67.2	-10.75	-10.75	-11	-11	-11	-12	-10.75	-11.75	-11.25				67.2	-6.25	-6.25	-7	-7	-6.25	-7.25	-6.25	-6.5	-6.25
		67.24	-11	-10.75	-11.5	-10.75	-11.25	-11.75	-11	-11.75	-11				67.24	-6	-6.25	-6.75	-6.25	-6.5	-7	-6.5	-7.25	-6.5
		67.28	-11.25	-10.75	-11.5	-11	-11.5	-11.25	-11	-11.75	-10.75				67.28	-6.75	-6.75	-6.75	-6.5	-6.5	-6.75	-6.5	-7.25	-6.75
		67.32	-11	-10.25	-11.25	-11	-11.5	-11	-11.25	-11.5	-11				67.32	-6.75	-6.25	-6.5	-6.75	-6.25	-6.25	-6.75	-7	-7.25
		67.36	-10.75	-10	-11	-11	-11.25	-10.75	-11.25	-12	-11.25				67.36	-6	-6	-6.75	-6.75	-6.25	-6	-6.5	-7	-6.75
		67.4	-10.25	-10.25	-11.25	-11	-11	-11.5	-11.25	-11.25	-11.5				67.4	-6.25	-6	-6.5	-6.5	-6.5	-6	-7	-6.25	-6.5
		67.44	-10.5	-10.75	-11.25	-11.25	-11.25	-11.5	-10.75	-10.75	-11.75				67.44	-6.5	-6.25	-7	-6.75	-6.75	-6.25	-6.5	-6.25	-6.75
		67.48	-11.25	-11.5	-11	-11.5	-11.25	-11.25	-11.25	-11	-11.5				67.48	-6.25	-6.75	-7	-6.5	-6.25	-6.25	-6	-6.25	-6.75
		67.52	-10.75	-11.75	-11.25	-11.75	-11.75	-11.25	-11.75	-11	-11				67.52	-6.25	-7	-7	-6.5	-6.5	-6.5	-6.5	-6.25	-6.5
		67.56	-10.5	-11.75	-11.5	-11.25	-11.75	-11.5	-11.25	-11	-11				67.56	-6.5	-6.75	-7	-6.5	-7	-6.75	-6.75	-6.5	-6
		67.6	-10.5	-11.75	-11	-10.75	-11.25	-11.75	-11	-11	-11.5				67.6	-6	-6.75	-6.5	-6.5	-6.75	-7	-6.25	-6	-6.75
		67.64	-10.75	-11.75	-10.75	-10.75	-11.25	-11.75	-10.75	-10.75	-11.5				67.64	-6.25	-7	-6.25	-6.5	-7	-7	-5.75	-5.75	-7.25
		67.68	-11.25	-11.75	-10.75	-11.25	-11.75	-11.5	-11.25	-10.5	-11.25				67.68	-6.5	-6.75	-6.5	-6.5	-7	-7	-6.5	-5.75	-7.25
		67.72	-11.5	-11.5	-10.75	-11	-11.5	-11.75	-11.5	-11	-11.5				67.72	-6.75	-7	-6.75	-6.75	-6.5	-6.75	-7	-6.5	-6.75
		67.76	-11.5	-11	-11.5	-10.5	-11.25	-11.75	-11.25	-11.75	-11.75				67.76	-7	-7	-7.5	-6.25	-6.5	-6.5	-7	-7.25	-7
		67.8	-11.5	-11	-11.75	-10.5	-11.5	-11.25	-11.5	-11.75	-11.75				67.8	-6.75	-6.75	-7	-6	-7	-6.25	-7	-7.5	-7
		67.84	-11	-11.25	-11.75	-10.75	-11	-11.25	-11.5	-11.25	-11.5				67.84	-6.5	-6.5	-6.5	-6.25	-7	-6.5	-6.5	-6.75	-6.5
		67.88	-10.25	-11.25	-11.25	-10.75	-11.25	-11.75	-12	-11.25	-11.75				67.88	-6.5	-7.5	-6.25	-6.5	-7.25	-6.75	-7	-6.5	-6.75
		67.92	-10.5	-11.25	-11	-11.25	-11.25	-11.5	-12.25	-11	-11.5				67.92	-6.5	-7.25	-5.75	-7	-6.75	-6.5	-7	-5.75	-6.75
		67.96	-11	-10.75	-10.5	-11.75	-10.75	-11.25	-12	-11.5	-12				67.96	-6.5	-6.25	-5.75	-7.5	-6	-6.75	-6.75	-6.25	-7
		68	-10.5	-10.75	-10.5	-11.25	-11	-11	-12	-11.25	-11.5				68	-6	-6.25	-6.25	-7	-6.75	-6.75	-6.75	-6.5	-6.5
		68.04	-10.25	-11	-10.25	-11.25	-11.25	-11	-11.5	-11.25	-11				68.04	-6	-6.5	-6.25	-6.5	-7	-7	-7	-7	-6.5
		68.08	-10.25	-11	-10.5	-11	-11	-11.25	-10.75	-11.25	-11.25				68.08	-6	-6.75	-6.25	-6.25	-6.75	-7.25	-6.5	-7	-7.25
		68.12	-10.5	-10.5	-11.5	-11.25	-11.25	-11.25	-10.25	-12	-11.75				68.12	-6.25	-6.5	-6.75	-6.75	-7	-7	-6	-7.25	-7.25
		68.16	-11	-10.5	-11.25	-11.25	-11.5	-11.75	-10.75	-12.25	-11.75				68.16	-6.5	-6.5	-6.75	-7	-7.25	-6.75	-6.5	-6.75	-6.75
		68.2	-10.75	-11.25	-10.5	-11.25	-11.75	-11	-11.5	-11.75	-11.75				68.2	-6.5	-6.25	-6	-6.75	-6.75	-6.25	-7	-6.5	-6.5
		68.24	-10.5	-11.25	-10.5	-11.75	-12	-11.25	-11.75	-11.25	-11				68.24	-6.25	-6.25	-6	-6.75	-6.25	-6.5	-7	-6.25	-6.5
		68.28	-10.25	-10.75	-10.75	-11.25	-12	-11.25	-11.5	-10.75	-11.25				68.28	-5.75	-6.5	-6.25	-6.5	-6.5	-6.5	-6.75	-6.25	-6.5
		68.32	-10.75	-10.25	-11	-10.5	-11.75	-11.25	-11.25	-10.75	-11.75				68.32	-6.5	-6.5	-6.75	-6.5	-6.5	-6.5	-6.5	-6.5	-6.75
		68.36	-11.25	-10.25	-11	-10.75	-11.5	-11	-11.25	-11	-11.75				68.36	-6.75	-6	-6.5	-7	-6.75	-6.5	-6.5	-6.75	-6.75
		68.4	-11.25	-11	-11	-10.5	-11.75	-11.25	-11	-11.75	-11.25				68.4	-6.75	-6.25	-6	-6.75	-6.75	-6.75	-6.5	-7	-6.75
		68.44	-10.75	-12	-10.75	-11	-11.25	-11.75	-11.25	-12	-11.25				68.44	-6.5	-6.75	-5.75	-6.75	-6.25	-7	-6.75	-7.5	-6.75
		68.48	-10.75	-11.75	-11.25	-11.25	-10.75	-12.25	-11.5	-12	-11.25				68.48	-6.25	-7	-6	-6.5	-6	-7	-6.75	-6.75	-6.25
		68.52	-10.75	-11	-11.5	-11.25	-10.75	-12.5	-11.75	-11.5	-11				68.52	-6.25	-6.75	-6.5	-6.5	-6.25	-7	-7	-6	-6
		68.56	-10.5	-10.75	-11.75	-11.5	-10.5	-12.5	-11	-11	-11.5				68.56	-5.75	-6.75	-7.25	-6.5	-5.75	-6.75	-6.5	-6.25	-6.25
		68.6	-11	-10.5	-11.5	-11.5	-11	-12.25	-11	-11.5	-11.25				68.6	-6.5	-7	-7.5	-6.25	-6.75	-6.75	-6.5	-7	-6.5
		68.64	-11	-11	-11.75	-10.75	-11	-12.25	-11.5	-11.75	-11.25				68.64	-6.75	-6.5	-7.75	-6.25	-6.5	-7.25	-7	-6.75	-6.75
		68.68	-10.75	-11.25	-11.25	-11.25	-11	-11.75	-11.5	-11	-11.25				68.68	-6.25	-6.5	-7.25	-6.75	-7	-7.25	-7	-6.5	-6.75
		68.72	-11	-11.25	-11	-12	-11.5	-11	-11	-11	-11.75				68.72	-6.75	-6.5	-6.5	-6.75	-7.25	-6.25	-6.75	-6.25	-7
		68.76	-10.75	-11.25	-10.75	-11.5	-11.25	-11	-10.75	-11.75	-11				68.76	-6.75	-6.75	-6.25	-7	-7	-6	-6.5	-6.5	-6.5
		68.8	-10.25	-12	-10.25	-11.25	-10.75	-10.25	-10.75	-11.5	-11				68.8	-6	-7.25	-6.25	-7	-6.5	-5.75	-6.75	-6.5	-6.5
		68.84	-10.5	-11	-11	-11.5	-11	-10.75	-11.5	-11.5	-11.75				68.84	-6.25	-7	-6.5	-7	-6.5	-6.5	-7	-6.75	-6.75
		68.88	-11	-10.75	-11	-11.25	-11.25	-10.5	-11.5	-11	-12.25				68.88	-6.5	-6.5	-6.5	-6.25	-6.5	-6.5	-6.25	-6.5	-6.75
		68.92	-11.25	-10.75	-11	-11.25	-11.5	-10.75	-11.5	-11	-11.75				68.92	-6.75	-6.5	-6.75	-6.5	-6.75	-6.75	-6.5	-6.5	-6.75
		68.96	-10.75	-11.5	-10.75	-10.75	-11.75	-11.25	-11.5	-11.25	-11.25				68.96	-6.75	-6.75	-6.75	-6.5	-7	-7	-7.25	-6.75	-7
		69	-10.5	-11.5	-11	-10.75	-11.75	-12	-11.75	-11.25	-11.25				69	-6.5	-6.5	-6.25	-7.5	-7.25	-7.25	-7	-6.5	-7
		69.04	-10.5	-11.5	-11.75	-10.5	-11.75	-11.5	-11.25	-11	-11.25				69.04	-6	-6.25	-6.25	-7.5	-6.5	-7.25	-6.25	-6.5	-7
		69.08	-11	-11.25	-11.5	-10.5	-11.25	-10.75	-11	-11.5	-12.25				69.08	-6.5	-6.25	-6	-6.75	-6.5	-7	-6.5	-7	-7
		69.12	-12	-11.25	-11.5	-11.25	-11	-10	-11	-11.5	-12.25				69.12	-7	-6.25	-6.5	-6.25	-6.5	-6.75	-6.5	-6.75	-7
		69.16	-11.5	-11.25	-11.5	-11	-10.25	-10.75	-11.25	-11.5	-12.25				69.16	-6.75	-6.5	-7	-6.25	-6.25	-6.75	-6.75	-7	-6.75
		69.2	-10.75	-11.25	-11	-11	-10.75	-11.5	-11.25	-11.25	-12				69.2	-6.5	-6.25	-6.25	-6.75	-6.25	-7	-6.75	-6.75	-6.5
		69.24	-10.25	-10.75	-11	-11.25	-10.75	-11.25	-11	-11.25	-11.5				69.24	-5.5	-6	-6.25	-6.5	-6.25	-6.75	-6.5	-6.75	-6.5
		69.28	-10.25	-10.5	-11.5	-11.75	-11.25	-11.5	-11	-11.25	-11.25				69.28	-6.25	-5.75	-7	-6.5	-6.75	-6.75	-6	-6.75	-6.25
		69.32	-10.5	-11	-11.25	-11.75	-11.75	-11.5	-11	-11.25	-12				69.32	-6.75	-6	-7	-6.75	-7	-6.75	-6.25	-6.5	-6.5
		69.36	-10.75	-11	-11.5	-11.75	-11.5	-11.75	-11.5	-11	-12				69.36	-6.5	-6.5	-6.75	-6.75	-7	-7.25	-6.75	-6.75	-7
		69.4	-10.75	-11.25	-11.25	-10.75	-11.5	-11.5	-11.25	-11.25	-11.25				69.4	-6.25	-7	-6.25	-6.25	-7	-7	-6.75	-6.25	-6.25
		69.44	-11	-11.25	-11.25	-11.5	-11.25	-11.25	-11	-12.25	-10.75				69.44	-6.25	-6.75	-6.25	-6.5	-6.5	-6.25	-6.25	-7	-6.25
		69.48	-11.25	-11	-11.25	-11.75	-10.75	-11.5	-11.25	-11.75	-11				69.48	-6.5	-7	-6.25	-6.75	-6.5	-6.25	-5.75	-6.75	-6.75
		69.52	-11.25	-10.75	-10.75	-11.75	-10.75	-11.75	-11.75	-11.25	-11.25				69.52	-6.75	-7	-6.25	-6.75	-6.5	-6.75	-6.5	-6.25	-6.75
		69.56	-10.25	-11	-10.5	-11.5	-11.25	-11.5	-12.25	-10.75	-11.25				69.56	-6.25	-7	-6.25	-6.25	-6.75	-6.75	-7.25	-5.5	-6.25
		69.6	-10.5	-10.75	-10.75	-11	-11.25	-11.75	-12.25	-11	-11				69.6	-6.5	-7	-6.5	-6	-6.75	-7	-7.25	-5.75	-6.25
		69.64	-10.5	-10.5	-11.25	-11.25	-11.5	-11.75	-12	-11.5	-11				69.64	-6	-6.75	-7	-6.5	-6.5	-6.75	-7.25	-6.5	-6.5
		69.68	-10.75	-11.25	-11.25	-11.25	-11.75	-11.25	-11.25	-11	-11.5				69.68	-5.75	-6.5	-7.25	-7	-7	-6.25	-6.5	-6.5	-6.75
		69.72	-11	-11.5	-11.75	-11.5	-11.75	-11.25	-10.75	-11.25	-11.75				69.72	-6	-6.25	-7.5	-6.75	-7	-6.25	-6.5	-6.75	-6.75
		69.76	-10.5	-11.5	-11.75	-12.25	-11	-11.5	-10.75	-11.5	-11.25				69.76	-6	-6	-7	-7	-6.5	-6.75	-6.5	-7.5	-6.5
		69.8	-10.25	-10.75	-11.5	-12	-10.5	-11.75	-11.25	-11.5	-11				69.8	-6.25	-6.25	-6.5	-6.75	-6.25	-7	-6.75	-7.25	-6.75
		69.84	-10.5	-10.75	-11.5	-11	-10.5	-11.25	-12	-11.5	-11.25				69.84	-6.5	-6.75	-6.5	-6	-6.25	-6.5	-7	-7	-7
		69.88	-10.25	-10.75	-11.25	-10	-10.75	-11.25	-12.5	-11.25	-11.75				69.88	-6.5	-6.5	-6.5	-6	-6.25	-6.75	-7	-6.5	-7.25
		69.92	-10.5	-10.75	-11.25	-10	-11	-11.25	-12.5	-11.5	-12				69.92	-6	-6.25	-6.25	-6.25	-6.5	-7	-7	-6.5	-7.5
		69.96	-10.75	-11	-11.25	-10.5	-11.75	-11.25	-11.5	-11.5	-12.25				69.96	-6.75	-6.25	-6.5	-6.25	-6.75	-6.75	-6.25	-6.5	-7.75
		70	-10.5	-11	-11.25	-11.25	-11.75	-11.5	-11.25	-11.25	-12				70	-6.5	-6.5	-6.75	-6.5	-6.25	-7	-6.75	-6.75	-7
		70.04	-10.75	-11	-11.5	-11.25	-11.5	-11	-11.25	-11	-12				70.04	-6.25	-6.5	-6.5	-6.25	-5.75	-6.75	-7	-6.5	-6.5
		70.08	-10.75	-11	-11.25	-11.5	-11.5	-11.25	-11.25	-10.75	-12				70.08	-6	-6.75	-6.5	-6.25	-6	-6.75	-6.75	-6.25	-6.5
		70.12	-10.5	-10.75	-11.25	-11	-10.75	-11.5	-11.75	-11	-11.75				70.12	-5.5	-6.5	-6.75	-6.75	-6	-6.75	-7.25	-6.25	-6.75
		70.16	-10.5	-10.5	-11.5	-10.5	-10.75	-11.25	-12.5	-11.5	-11.25				70.16	-5.75	-6.75	-6.75	-6.75	-6.25	-6.25	-7.5	-6.75	-7
		70.2	-11	-11.5	-11.5	-10.75	-11	-11	-11.75	-11.75	-11.25				70.2	-6.5	-7	-6.75	-6.75	-6.75	-6.5	-7.25	-7.25	-7.25
		70.24	-11	-11.25	-11.5	-11.25	-11.5	-11	-11.5	-11.25	-11.25				70.24	-6.5	-6.5	-7.25	-6.75	-7.25	-6	-6.75	-6.75	-7.25
		70.28	-11	-11	-11.5	-11	-11.25	-11	-10.5	-11.75	-11				70.28	-6.75	-6.5	-7.5	-6	-7	-5.75	-6.25	-6.75	-7
		70.32	-11	-11.5	-11.25	-11.25	-11.25	-11	-10.5	-11.25	-10.75				70.32	-7	-7.25	-6.75	-6	-6.75	-6.25	-6.5	-6.25	-6.75
		70.36	-10.75	-11.5	-11.5	-11.25	-11.25	-11.5	-10.75	-11.25	-10.75				70.36	-6.25	-7	-6.25	-6	-6.5	-7	-6.75	-5.75	-6.25
		70.4	-10.25	-11	-11	-11.25	-11.75	-11.5	-11	-11.5	-11				70.4	-5.5	-6.5	-6.5	-6.5	-7	-7.5	-6.25	-6	-6
		70.44	-10.25	-11	-11	-11.5	-11.5	-11.75	-11	-11	-11.25				70.44	-5.5	-6.25	-6.75	-7	-6.75	-7.25	-6	-6.5	-6.5
		70.48	-10.75	-10.75	-11	-11.5	-10.75	-11.25	-10.75	-10.5	-11.5				70.48	-5.75	-6	-6.75	-6.75	-6.25	-6.75	-6	-6	-6.75
		70.52	-11	-11	-11	-11.5	-11.25	-11	-11	-10.75	-11.75				70.52	-6.5	-6.5	-6.25	-6.75	-6.5	-6.5	-6.25	-6.25	-7
		70.56	-11	-10.75	-11.25	-11.25	-11.75	-10.75	-11.25	-11.25	-11.75				70.56	-6.75	-6.5	-6	-6.75	-6.5	-6.25	-6.5	-7	-7.5
		70.6	-11	-10.75	-11.25	-11.5	-12.25	-11	-11.25	-11.75	-11.5				70.6	-6.5	-6	-6.25	-7	-6.5	-6	-6.5	-7.5	-7.5
		70.64	-11	-11.25	-11	-11	-12	-11.25	-11.5	-11.75	-11.25				70.64	-6.5	-6	-6.5	-7	-6.5	-6	-6.25	-7.5	-6.5
		70.68	-11.75	-11.5	-10.5	-10.75	-11.25	-11.5	-11.75	-11.5	-11.25				70.68	-6.75	-6.25	-6.5	-6.5	-6.5	-6.25	-6	-7	-6.5
		70.72	-11.75	-11	-11	-10.5	-10.75	-11.5	-11.5	-11.25	-11.5				70.72	-7.25	-6	-6.75	-6	-6.5	-6.75	-6.25	-6.25	-6.5
		70.76	-10.75	-11.25	-11.25	-10.75	-10.75	-11.75	-12	-10.75	-11.5				70.76	-6.75	-6	-6.5	-6	-7	-7.5	-6.75	-6	-6.5
		70.8	-10	-11.5	-11.75	-10.75	-11	-11.25	-11.5	-11	-11.75				70.8	-6.25	-6.75	-6.5	-6	-7	-6.75	-6.75	-6.25	-6.75
		70.84	-10.25	-11.5	-11.25	-10.75	-11	-11	-11.25	-11.5	-11.75				70.84	-6.25	-6.75	-6.5	-6	-6.75	-6.5	-7.25	-6.5	-6.75
		70.88	-11	-11	-11.25	-11.25	-10.75	-11.25	-11.5	-11.75	-11.5				70.88	-6.5	-6.75	-6.75	-6.5	-6.25	-6.5	-7	-6.75	-6.75
		70.92	-11	-10.75	-11.25	-11	-10.75	-11.25	-12	-11.25	-11.75				70.92	-6.25	-6.5	-6.75	-5.75	-6.25	-6.75	-6.5	-6.75	-6.25
		70.96	-10.5	-10.75	-11	-11.5	-10.75	-11.25	-12	-11.25	-11.75				70.96	-6	-7	-6.75	-6	-6.5	-6.75	-6.25	-6.75	-6
		71	-10.75	-10.5	-11	-11.5	-10.5	-11	-12.25	-11.5	-12.25				71	-6.5	-6.75	-6.5	-6.75	-6.25	-6.25	-6.75	-6.75	-6.75
		71.04	-10.75	-10.75	-11	-11	-10.75	-11	-11.75	-12	-12				71.04	-6.75	-6.5	-6.25	-6.75	-6.25	-6.25	-6.25	-7	-6.75
		71.08	-10.75	-11	-10.5	-11	-11.5	-10.75	-11.5	-11.75	-11				71.08	-6.75	-6.5	-6.25	-7	-6.5	-6.25	-6.25	-6.5	-6.25
		71.12	-10.5	-10.75	-10.5	-10.5	-12	-11	-10.75	-11.5	-11				71.12	-6	-6.5	-6.25	-7	-6.75	-6.5	-6.25	-6.5	-6.25
		71.16	-10.75	-10.75	-11	-11	-11.75	-12	-10.5	-11.5	-11				71.16	-6.25	-6.75	-6.5	-7.25	-6.75	-7	-6.5	-6.5	-6.5
		71.2	-10.5	-11	-11.75	-11.25	-11.75	-12.25	-11	-11	-11.25				71.2	-6.5	-6.5	-7.25	-7.25	-6.5	-7	-6.5	-6.5	-6.25
		71.24	-10.5	-11.25	-11.5	-11.75	-11	-11.75	-11.25	-11.75	-11.5				71.24	-6.25	-6	-6.75	-6.75	-6.5	-7	-6.25	-6.75	-6.5
		71.28	-10.5	-11	-11	-11.5	-10.75	-11.25	-11.25	-12	-11.25				71.28	-6.5	-6.25	-6.5	-6.5	-7	-7	-6.5	-7	-7.25
		71.32	-10.75	-11.25	-11	-11.5	-10.5	-10.75	-11.5	-11.75	-11				71.32	-6.5	-6.75	-5.75	-6.75	-6.75	-7	-7.25	-6.75	-7
		71.36	-11.25	-11.25	-11	-10.75	-11.25	-11	-11.5	-11	-10.75				71.36	-6.5	-6.75	-6.25	-6.75	-6.75	-7.25	-7.25	-6.25	-6.5
		71.4	-11	-11	-11	-11	-11.5	-11.25	-11.5	-10.75	-10.5				71.4	-6.5	-6	-7	-6.75	-6.75	-7	-7	-6.25	-6
		71.44	-10.5	-11	-10.75	-11	-11.5	-11	-11.5	-11	-10.75				71.44	-6	-6	-7	-6.5	-6.75	-6.5	-6.5	-6.75	-6.75
		71.48	-10.75	-11.25	-11.25	-10.75	-11.5	-11.5	-11.5	-11.5	-10.75				71.48	-6	-6.5	-6.75	-6.5	-6.25	-6	-6.75	-6.75	-6.5
		71.52	-11.5	-10.75	-11.25	-10.75	-11.75	-11.5	-11.5	-11.5	-11				71.52	-6.25	-6.5	-6.5	-6.5	-6.25	-6.25	-7.25	-6.25	-6.5
		71.56	-11.25	-10.5	-10.75	-11	-11.25	-11.25	-11.5	-11.25	-11.75				71.56	-6.5	-6.5	-6.25	-6.75	-6.25	-6.5	-7.25	-6.5	-7
		71.6	-11	-11.25	-10	-11.5	-11.25	-11.5	-11.25	-11	-12				71.6	-7	-6.75	-6	-6.5	-6.5	-7	-6.5	-6.5	-7.25
		71.64	-11	-11.5	-10	-11.25	-11.25	-11.5	-11.25	-11	-11.75				71.64	-7	-6.75	-6	-6.25	-6.75	-6.75	-6.75	-6.75	-7
		71.68	-10.75	-11.25	-10.75	-11	-10.75	-12	-11.75	-11	-11.5				71.68	-6.5	-6.75	-6.25	-6	-6.5	-7	-7	-6.5	-6.5
		71.72	-11	-10.5	-11.25	-11.5	-10	-11.75	-11.75	-11.25	-11				71.72	-7	-6.5	-6.25	-6.25	-6.5	-6.75	-7.5	-6.5	-6.25
		71.76	-10.75	-10.75	-11.5	-11.75	-10.25	-11.5	-11.5	-11.25	-10.5				71.76	-6.5	-6.25	-6.75	-6.25	-6.75	-6.5	-7.25	-6.5	-6.25
		71.8	-10.75	-10.75	-11.5	-11.75	-10.75	-10.75	-11.75	-11.75	-11				71.8	-6.25	-6.25	-7	-6	-6.75	-6.25	-7.25	-6.75	-6.75
		71.84	-11.25	-11	-11.25	-11.5	-11.5	-10.75	-11.25	-12	-11.5				71.84	-6.5	-6.5	-6.75	-6	-6.75	-6	-6.5	-6.5	-6.5
		71.88	-11	-10.5	-11	-11	-11.5	-10.75	-11.25	-11.75	-11.5				71.88	-6.25	-6.25	-6.5	-6.25	-6.25	-6.25	-6.25	-6.75	-6.25
		71.92	-10.5	-10.75	-11.25	-11	-11.5	-10.75	-11.25	-11.25	-11.25				71.92	-6	-6.5	-6.25	-6.75	-6	-6.25	-6.75	-6.5	-6.5
		71.96	-10.5	-11	-11.25	-11.5	-11.25	-11	-11.5	-10.5	-11.5				71.96	-6.5	-6.5	-6.25	-7.25	-6	-6.5	-7	-6.75	-6.75
		72	-10.5	-10.75	-11.25	-11.25	-11	-11	-11	-10.25	-12.25				72	-6.5	-6.25	-6.5	-7.5	-6	-6.75	-6.75	-6.25	-7
		72.04	-10.5	-10.5	-11.25	-10.75	-11.25	-11.75	-10.5	-11	-12.5				72.04	-6.25	-6	-6.5	-7	-6.5	-7	-6.5	-6.25	-7.25
		72.08	-10.5	-10.75	-11.75	-11	-11.25	-11.25	-10.75	-11	-12				72.08	-6	-6.25	-6.75	-6.75	-6.75	-6.5	-6.25	-6.25	-7.5
		72.12	-10.5	-10.75	-11.5	-11.25	-10.75	-11.25	-12	-11	-11.5				72.12	-6.5	-6.75	-7	-6.5	-6.5	-6.5	-6.75	-6.5	-6.75
		72.16	-11	-10.75	-11	-11.25	-10.75	-11.5	-12.25	-10.75	-11.5				72.16	-6.75	-7	-6.75	-6.5	-6.75	-6.5	-6.75	-6.25	-6.5
		72.2	-11	-10.75	-10.25	-10.75	-11.5	-11.25	-11.25	-11.25	-11.25				72.2	-6.75	-6.75	-6	-6.25	-7.25	-6.5	-6.5	-7	-6.25
		72.24	-11	-10.5	-10.75	-10.75	-11.75	-11	-11	-11.5	-10.75				72.24	-7	-6.5	-6.25	-6.75	-7	-6.5	-6.25	-7.5	-6.25
		72.28	-10.5	-10.75	-11	-10.75	-11.5	-11.5	-11	-11.5	-11				72.28	-6.5	-6.25	-6.25	-7	-6.5	-7.25	-6.75	-7.25	-6.75
		72.32	-10	-10.75	-10.5	-11	-11.25	-11.5	-10.25	-11.5	-11				72.32	-6	-6.25	-6.25	-7	-6.5	-7.25	-6.5	-7.25	-7
		72.36	-10	-11	-10.25	-11.5	-11	-11.25	-10.25	-11.5	-10.75				72.36	-6	-6.5	-6.5	-7.25	-6.5	-6.5	-6	-7	-7
		72.4	-10	-10.75	-10.5	-11.25	-11.25	-10.75	-11	-11.75	-10.75				72.4	-6	-6.25	-6.25	-7.25	-6.75	-6	-6.75	-7	-6.75
		72.44	-10.75	-11.25	-11	-10.75	-11.25	-11.25	-11.25	-11.75	-11.25				72.44	-6.25	-6	-6.5	-6.5	-6.75	-6.25	-7	-6.75	-6.5
		72.48	-10.75	-11.5	-11	-10.75	-11.25	-11.5	-11.25	-11.75	-12				72.48	-6.75	-6.25	-6.5	-6.25	-6.75	-6.75	-7	-6.5	-7
		72.52	-10.25	-11	-11.25	-10.75	-11.25	-11.5	-10.5	-11.75	-12.25				72.52	-5.75	-5.75	-6.75	-6.25	-6.5	-7	-6.75	-6.75	-7.25
		72.56	-10.25	-11.25	-11.5	-11.5	-11.25	-11.25	-10.5	-11.75	-11.75				72.56	-5.5	-6	-6.75	-7	-6.75	-6.5	-6.75	-7	-7
		72.6	-10.25	-10.75	-11.25	-11.5	-11	-11	-11.25	-11.5	-11.5				72.6	-5.75	-6	-6.5	-7.25	-6.5	-6.5	-7	-7	-7
		72.64	-10.5	-10.25	-11	-11.25	-11.25	-10.75	-11.25	-11	-11.5				72.64	-6	-6	-6.75	-7	-6.75	-6.5	-6.5	-6.75	-6.75
		72.68	-11	-10.75	-10.75	-11.25	-11.5	-10.75	-11	-11.25	-11.25				72.68	-6.5	-6.5	-6.5	-6.75	-7	-6.25	-6	-6.75	-6.75
		72.72	-11.5	-11.5	-10.75	-11.25	-11.25	-11	-11.5	-11.25	-10.75				72.72	-7.25	-7	-6.75	-6.75	-6.75	-6.25	-6.5	-6.25	-6.5
		72.76	-11	-11.5	-11	-11	-11.5	-11.25	-11.75	-11.25	-11				72.76	-7	-7.25	-6.75	-6.75	-6.5	-6.75	-7	-6.5	-6.5
		72.8	-11	-10.75	-11	-11.5	-11.25	-11.25	-12	-11.25	-11.5				72.8	-6.25	-7.5	-6.25	-7	-6.5	-7.25	-7.75	-6.5	-6.75
		72.84	-11	-10.5	-10.25	-11.25	-11	-11.25	-11.75	-11	-11.75				72.84	-6.25	-7.25	-6	-6.75	-6.75	-7.25	-7.5	-6.75	-6.25
		72.88	-10.5	-11	-10.75	-11	-10.5	-11.75	-11.25	-10.75	-12				72.88	-5.75	-7	-6.5	-6.75	-6.5	-7	-6.75	-6.75	-6.75
		72.92	-10.5	-10.75	-11.75	-11	-10.75	-12	-11	-10.5	-11.75				72.92	-6	-6.25	-7	-6.75	-6.5	-7.25	-6	-6.5	-7.25
		72.96	-10.5	-10.5	-11.5	-10.5	-11.25	-11.5	-11	-11.25	-11.5				72.96	-7	-6	-7	-6.75	-6.25	-7	-6.25	-6.75	-7
		73	-10.5	-10.25	-10.75	-10.75	-11.25	-11.25	-11.25	-11.5	-11.25				73	-7	-6	-6	-6.75	-6.25	-6.5	-6.75	-7.25	-6.25
		73.04	-11	-10.25	-10.5	-10.25	-11	-11.25	-11.5	-11	-10.75				73.04	-6.75	-6.25	-6	-6.5	-6.5	-6.25	-7.25	-7	-5.75
		73.08	-11	-10.75	-10.5	-10.5	-11	-10.75	-11.25	-10.75	-11.25				73.08	-6.5	-6.75	-6.25	-6	-6.75	-6.5	-6.75	-6.25	-6.5
		73.12	-11	-11	-10.5	-11	-10.5	-10.5	-11	-11.5	-11				73.12	-6.5	-6.5	-6.25	-6.25	-6.5	-6	-6	-6.5	-6.75
		73.16	-11	-11.25	-10.5	-12	-10.5	-11	-10.5	-11.75	-11.25				73.16	-6.5	-7	-6.5	-7	-6.75	-6.5	-6.5	-7	-7
		73.2	-10.75	-11.25	-10.75	-11.5	-10.75	-12	-10.75	-11.75	-11.25				73.2	-6.5	-7	-6.5	-6.75	-6.75	-7	-7	-7	-7
		73.24	-10.75	-11	-11	-11.25	-11	-11.75	-11.5	-11.75	-11.5				73.24	-6.5	-7	-7	-7	-6.75	-6.5	-7.5	-7	-7
		73.28	-10.5	-11.25	-10.5	-11	-10.75	-10.75	-11.75	-11.5	-12				73.28	-6.75	-7.25	-7	-6.75	-6.5	-6.25	-7.25	-6.75	-6.75
		73.32	-10.75	-11	-10.25	-11	-11.25	-10.75	-11.5	-11	-11.25				73.32	-7	-7	-6.75	-6.75	-6.5	-7	-6.5	-6.75	-6.5
		73.36	-10.75	-10.75	-10.75	-11	-10.5	-10.75	-11	-11.25	-11.25				73.36	-7	-6.5	-6.5	-6.75	-6.75	-6.75	-6	-7	-6.25
		73.4	-11	-11	-10.75	-11	-10.25	-11	-11.25	-11.75	-11				73.4	-6.75	-6.5	-6	-6.5	-6.75	-6.5	-6.5	-6.75	-6.25
		73.44	-11	-10.75	-10.5	-11	-11	-11.25	-11	-11.75	-11.25				73.44	-7	-6.5	-6	-6.5	-6.75	-6.5	-6.75	-6.25	-6.25
		73.48	-11	-11.25	-10.5	-10.75	-10.75	-11.25	-11.25	-11.75	-11.5				73.48	-7	-6.75	-6.5	-6.25	-6.5	-6	-6.75	-6.5	-6.5
		73.52	-10.75	-11.25	-10.5	-10.75	-11	-11	-11.5	-11.5	-11.25				73.52	-7.25	-6.5	-7	-6.75	-6.25	-6.25	-6.75	-6.5	-6.25
		73.56	-10.5	-11.25	-10.5	-10.75	-11	-11	-11.5	-11	-11				73.56	-6.5	-6.5	-7	-6.75	-6.75	-6.75	-6.5	-6.5	-6.25
		73.6	-10.25	-11.5	-11	-10.75	-11.25	-11.25	-11.25	-11	-11				73.6	-6	-7.25	-7	-6.5	-6.75	-7	-6.5	-7	-6.5
		73.64	-10.5	-11.25	-11.25	-10.75	-10.5	-11.25	-11.25	-11.25	-11.5				73.64	-6	-6.75	-6.75	-6.75	-6	-7.25	-7	-7	-7.25
		73.68	-10.75	-11.25	-11.25	-11	-10.75	-11.5	-10.75	-11	-11.75				73.68	-6	-6.75	-6.25	-7	-6	-7.5	-6.75	-6.5	-7
		73.72	-11.25	-10.25	-10.75	-11.25	-10.75	-11.25	-10.75	-11	-11				73.72	-6.75	-6.25	-6.25	-7	-6.25	-7.5	-6.75	-6.25	-7
		73.76	-10.75	-10.25	-10.5	-10.75	-11.25	-11	-11.25	-11.25	-10.5				73.76	-6.75	-6.25	-6.75	-6.5	-6.5	-7	-7	-6.5	-6.75
		73.8	-10.25	-10.5	-10.5	-11	-11.75	-11.5	-11.25	-11.25	-10.75				73.8	-6.25	-6.5	-7	-6.5	-7	-7	-7	-7	-6.5
		73.84	-10.5	-10.5	-10.75	-11	-12	-11	-11.25	-11.25	-11.25				73.84	-6	-6.75	-6.75	-6.5	-7.5	-6.75	-6.75	-7.25	-6.75
		73.88	-11	-10.75	-10.5	-11	-11.5	-10.75	-11	-11.5	-11.25				73.88	-6.25	-6.75	-6.25	-6.5	-7.25	-7	-6.75	-7	-6.25
		73.92	-11.25	-10.75	-10.75	-10.75	-10.5	-11.5	-11.25	-11.75	-11.5				73.92	-7	-6.5	-6.25	-6.25	-6.75	-7	-6.75	-7	-6.25
		73.96	-11	-10.75	-11	-10.5	-10.25	-11.5	-11.25	-11.25	-11.5				73.96	-7	-6.75	-6.5	-6	-6	-6.25	-6.75	-6.75	-6.25
		74	-10.75	-10.25	-11	-10.75	-10	-11.5	-11.25	-10.75	-11.25				74	-6.75	-6.5	-6.25	-6.75	-5.75	-6.25	-6.75	-6.5	-6.75
		74.04	-10.5	-10.5	-10.5	-10.75	-10.75	-10.75	-11.25	-10.5	-11.5				74.04	-6.25	-6.25	-6	-6.75	-6.5	-6	-6.5	-6.25	-6.75
		74.08	-11.5	-10.75	-11.25	-10.75	-11	-11	-10.25	-11	-11.75				74.08	-6.75	-6.25	-6.25	-6.5	-6.5	-6.5	-6.25	-6.75	-7
		74.12	-11.25	-10.75	-11.75	-10.5	-11	-11.25	-10.25	-11.5	-12				74.12	-6.5	-6.25	-6.5	-6.25	-6.75	-6.75	-6.5	-6.75	-7.25
		74.16	-11.25	-10.75	-11.5	-10.75	-11.25	-11	-10.75	-11.5	-12				74.16	-6.25	-6.5	-6.25	-6.25	-7	-6.25	-6.75	-7	-7.5
		74.2	-11.25	-10.5	-11.5	-11.25	-11.5	-11	-11.25	-11.25	-11.5				74.2	-6.5	-6.5	-6.25	-6.5	-7	-6.5	-6.75	-6.75	-7
		74.24	-10.75	-10.5	-11	-12	-11.5	-10.75	-11.25	-10.75	-11.5				74.24	-6.75	-6.25	-7	-7	-6.75	-6.25	-6.75	-6	-7
		74.28	-10.5	-10.5	-10.75	-12.25	-11.25	-11	-11	-11.25	-11.25				74.28	-7	-6.25	-7	-7.75	-6.75	-6.5	-6.75	-6.5	-7
		74.32	-10.5	-11	-10.5	-11.5	-11	-11	-11.5	-11.5	-11.5				74.32	-6.5	-6.75	-6.25	-7.5	-6.75	-6	-7	-6.5	-7
		74.36	-11.25	-11.5	-10	-10.5	-11	-11	-11	-11.25	-12				74.36	-6.75	-7	-6	-6.5	-6.75	-6	-6.75	-6.5	-6.75
		74.4	-11.25	-11.75	-9.75	-10.5	-10.5	-10.5	-11.5	-11.25	-12.25				74.4	-6.5	-7	-6.25	-6.5	-6.25	-6	-7	-6.25	-7
		74.44	-10.75	-11.75	-9.75	-10.75	-10.25	-11.25	-11	-11.25	-11.5				74.44	-6	-6.5	-6	-6.5	-6.5	-6.75	-6.75	-6.25	-6.75
		74.48	-10.25	-11.75	-10.25	-11.5	-10.5	-11.25	-11	-11.25	-11				74.48	-6	-6.25	-6.5	-7	-6.25	-7	-7	-6.75	-6.25
		74.52	-10.5	-11	-10.75	-11	-11	-11.25	-12	-11.75	-11				74.52	-6.25	-6	-6.75	-7.25	-6.25	-7	-7.25	-7.25	-6.5
		74.56	-10.75	-11	-10.75	-10.75	-11.75	-11	-11.25	-11.5	-11				74.56	-6.75	-6.5	-7.5	-6.75	-7	-6.5	-6.75	-7.5	-6.5
		74.6	-10.5	-11.25	-11.25	-11.25	-11.25	-11	-11.25	-11.25	-11.25				74.6	-6.75	-6.75	-7.75	-7	-7	-6.25	-6.5	-6.75	-6.25
		74.64	-10.5	-10.5	-11.5	-11.25	-11	-11.25	-11.5	-11.5	-11				74.64	-6.25	-6.25	-7	-6.5	-7	-6	-6.75	-6.25	-6
		74.68	-10.75	-10.25	-11.25	-11.5	-11	-11	-11	-11	-10.5				74.68	-6.5	-6	-6.5	-6.5	-6.75	-6.25	-6.5	-5.75	-6.25
		74.72	-11	-10.25	-11.25	-11.25	-11.25	-11.25	-11.25	-10.75	-10.25				74.72	-6.5	-6.75	-6.75	-6.75	-6.75	-7	-6.5	-5.75	-6.75
		74.76	-11.25	-10.5	-11.25	-11	-11.5	-11.25	-11.5	-11.25	-11				74.76	-7	-7.25	-6.75	-7	-7.5	-7.25	-6.75	-6.5	-7
		74.8	-11.5	-10.25	-11.25	-10.75	-11.25	-11.25	-11.75	-11.5	-11.75				74.8	-6.5	-6.5	-7	-7	-7.5	-7	-7	-6.5	-7.25
		74.84	-11.25	-11	-11.25	-11	-10.75	-11	-11.25	-11.75	-11				74.84	-6.25	-6.25	-7	-7	-7	-6.75	-6.75	-6.75	-6.75
		74.88	-10.25	-11.25	-11	-11	-10.25	-11.25	-10.75	-11.5	-11.25				74.88	-6	-6.25	-7	-6.75	-6.5	-7	-6.5	-6.75	-6.75
		74.92	-10	-10.75	-10.75	-11	-10.25	-11	-10.5	-11.5	-11.5				74.92	-6.25	-6.25	-6.75	-6.75	-6.25	-6.75	-6.5	-6.5	-6.75
		74.96	-10.5	-10.75	-11	-10.75	-10.25	-11	-10.5	-11.25	-11				74.96	-6.25	-6.5	-6.75	-6.75	-6.25	-6.75	-6	-6.5	-6.25
		75	-10.75	-11	-11	-11	-10.25	-11.25	-11.25	-10.75	-10.5				75	-6.5	-6.75	-6.75	-6.75	-6.25	-7	-5.75	-6.25	-6.25
		75.04	-10.5	-10.75	-11.25	-11.25	-10.5	-11.25	-11.25	-10.5	-10.25				75.04	-7	-6.25	-6.75	-6.25	-6	-7	-6	-5.75	-6.5
		75.08	-10.25	-11	-11	-11.5	-11	-11.25	-11	-10.75	-11				75.08	-6.5	-6.25	-6.5	-7	-6	-7	-6.5	-6	-6.5
		75.12	-10.25	-11	-10.75	-11.25	-11	-11.25	-11.5	-10.75	-11.5				75.12	-6.75	-7	-6.5	-7	-6.5	-7	-6.5	-6.5	-6.25
		75.16	-10.75	-11.25	-11	-11	-10.5	-11.25	-11	-10.75	-11.5				75.16	-7	-7.25	-6.75	-6.75	-6.5	-6.25	-6.5	-6.5	-6.25
		75.2	-10.75	-11.25	-11.25	-11	-10.5	-11.25	-10.75	-10.75	-11				75.2	-6.75	-6.75	-6.75	-6.5	-6.25	-6.25	-6.75	-6.25	-6.5
		75.24	-11	-10.75	-11.25	-10.75	-11	-11	-11	-10.75	-10.75				75.24	-6.75	-6.75	-6.75	-6.25	-6	-6.25	-7.5	-6.25	-6.25
		75.28	-10.5	-10.25	-11.5	-10	-10.75	-11	-11.25	-10.5	-11.5				75.28	-6.5	-6.5	-7	-6	-6	-6	-7.25	-6.25	-6.5
		75.32	-10.5	-10.5	-11.25	-10	-10.25	-10.75	-11.25	-10.75	-11.75				75.32	-6.5	-6.25	-7	-5.75	-6	-5.75	-7	-6	-6.75
		75.36	-10.25	-10.5	-10.75	-10.25	-10.75	-11.25	-11.25	-10.5	-10.75				75.36	-6.25	-6	-6.75	-6.25	-6.25	-6	-6.5	-6	-6.75
		75.4	-10.5	-11.25	-10.5	-10.75	-11.5	-11.25	-11.25	-10.75	-10.5				75.4	-6.25	-6.5	-6.25	-6.5	-7	-6.5	-6.25	-6.75	-6.25
		75.44	-10.75	-11.5	-10.75	-10.75	-11.5	-11.5	-11	-10.75	-10.75				75.44	-6.75	-6.5	-6.25	-6.5	-7	-7	-6.5	-6.5	-6.25
		75.48	-10.75	-11.25	-10.5	-11	-11.25	-11.25	-10.75	-11	-11				75.48	-6.5	-6.5	-5.75	-6.75	-7.25	-6.5	-6.25	-6.5	-6.75
		75.52	-10.5	-10.75	-10.25	-11	-10.75	-10.5	-11	-10.75	-11.25				75.52	-6.5	-6	-6	-6.5	-7	-6.25	-6.25	-6.5	-7.25
		75.56	-10.75	-10.25	-10	-11	-10.75	-10.5	-11	-11	-11.5				75.56	-6.25	-6	-5.75	-6.5	-6.75	-5.75	-6.75	-6.25	-7
		75.6	-10.75	-9.75	-10.75	-10.75	-10.75	-10.25	-11.25	-11.75	-11.75				75.6	-6	-6.25	-6	-6.5	-6.5	-5.75	-7	-6.5	-6.5
		75.64	-10.25	-9.75	-11	-10.75	-11	-10.5	-11	-11.75	-11.5				75.64	-5.75	-6.25	-6.75	-6.5	-6.75	-6.25	-7	-6.5	-6.25
		75.68	-10.5	-9.75	-10.75	-11	-10.75	-11	-10.75	-11.5	-11.75				75.68	-6.25	-6.5	-6.5	-6.25	-6.25	-6.25	-6.5	-6.5	-7
		75.72	-11	-10.75	-10.75	-11	-10.5	-11	-10.5	-11.75	-11.5				75.72	-6.75	-6.75	-6.5	-6.25	-6	-6.5	-6.25	-6.75	-6.75
		75.76	-11	-10.5	-9.75	-11.25	-10.5	-11	-10.75	-11	-11				75.76	-6.75	-6.25	-6.5	-6.5	-6	-6.75	-6.5	-6.75	-6.5
		75.8	-10.75	-10.75	-10.5	-12	-10.5	-10.75	-11	-11.25	-10.25				75.8	-6.5	-6.5	-7	-7	-6.5	-7	-6.5	-6.75	-6.25
		75.84	-10.5	-10.75	-11	-11.75	-10.5	-11.25	-11.25	-11.25	-10.5				75.84	-6.25	-5.5	-7	-7	-6.5	-7.5	-6.25	-6.75	-6.25
		75.88	-10	-11.5	-11.25	-10.75	-11	-11.5	-10.75	-11.25	-11.5				75.88	-6	-6	-6.75	-6.5	-6	-7	-5.75	-7	-6.25
		75.92	-9.5	-11.75	-11	-10.25	-10.75	-11.25	-10.75	-11.5	-12				75.92	-5.75	-6.25	-6.5	-5.75	-5.75	-7	-6.25	-6.75	-6.75
		75.96	-10	-11.5	-10.75	-10.75	-11.25	-11.25	-11.5	-11	-11.75				75.96	-5.75	-6.5	-6.75	-6.25	-6.75	-7	-6.75	-6.5	-6.5
		76	-10.5	-11.5	-11	-10.75	-11.75	-11.5	-11.5	-10.75	-11.5				76	-5.5	-6.75	-6.5	-6.25	-7	-6.5	-7.25	-6.75	-6.5
		76.04	-10.5	-11	-11.25	-11	-11.5	-11.75	-11	-11	-11				76.04	-5.5	-7	-6.75	-6	-6.75	-6.5	-7.25	-6.5	-6.25
		76.08	-10	-11.5	-10.5	-11	-11	-11.75	-10.5	-10.75	-11				76.08	-5.75	-7.25	-6	-6.25	-6.5	-6.75	-6.5	-6.5	-6
		76.12	-10.25	-11.25	-10	-11.25	-10.75	-11.25	-10.75	-10.75	-11.25				76.12	-6.25	-6.75	-5.5	-7	-6.25	-6.25	-6.5	-6.25	-6.5
		76.16	-9.75	-10.5	-10.75	-11	-10.5	-11.5	-11	-11	-11.25				76.16	-6.25	-6.25	-6	-6.75	-6.5	-6.25	-6.75	-6.25	-6.75
		76.2	-10	-10.75	-11	-10.5	-11	-11	-11.5	-11.5	-11.5				76.2	-6	-6	-6.5	-6.5	-6.75	-6.25	-6.25	-6.25	-7
		76.24	-10	-10.25	-11.5	-10.5	-11.25	-10.75	-11.75	-11.75	-11.25				76.24	-5.75	-5.75	-6.75	-6	-6.75	-6.75	-6.25	-6.25	-7.25
		76.28	-10.5	-10.25	-11.5	-10.25	-11.25	-11	-11.5	-12	-10.5				76.28	-6.25	-5.75	-6.75	-6.25	-6.5	-6.75	-6.5	-6.5	-7
		76.32	-10.5	-10.5	-11.25	-10.75	-11.25	-11	-11.25	-11	-10.75				76.32	-6	-6.25	-7	-6	-6.5	-6.75	-6.25	-6.5	-6.75
		76.36	-10.5	-10.25	-11	-10.75	-11	-11.5	-10.75	-11	-10.75				76.36	-6	-5.75	-6.5	-6	-6.75	-6.5	-6.25	-6.75	-6.5
		76.4	-11.25	-11	-10.5	-11	-11.25	-11.5	-11	-11.25	-11.75				76.4	-6.5	-6.5	-6	-6.5	-6.75	-6.25	-7	-7.25	-7
		76.44	-10.75	-11.5	-10.25	-10.75	-11	-11.25	-11.25	-11.5	-12				76.44	-6.75	-6.75	-6.5	-6.5	-6.5	-6.5	-7	-7	-6.75
		76.48	-10.75	-11.25	-10.25	-10	-11.25	-10.75	-11.75	-10.75	-11.25				76.48	-6.75	-6.75	-6.5	-6.25	-6.5	-6.25	-7.25	-6.5	-6.25
		76.52	-11	-11	-10.5	-11	-11.25	-10.75	-11.75	-10.25	-10.75				76.52	-6.75	-6.5	-6.5	-6.5	-6.25	-6	-7	-6.5	-6.25
		76.56	-11	-10.75	-11.25	-11	-11	-11	-11.75	-10.5	-10.75				76.56	-6.5	-6.25	-6.75	-6.5	-6	-6	-7	-6.25	-6.25
		76.6	-10.5	-10.75	-11.25	-10.75	-11	-11.75	-11.5	-11	-10.75				76.6	-6.5	-5.75	-7	-6.75	-6.25	-6.75	-6.75	-6.25	-6.5
		76.64	-10	-11	-11	-11	-10.5	-12	-11.5	-10.75	-11.5				76.64	-6	-6.25	-7	-6.75	-6.5	-6.75	-6.75	-6.25	-6.75
		76.68	-10.75	-10.5	-11	-11.25	-10.5	-11.25	-11.5	-10.25	-11.75				76.68	-6.25	-5.75	-6.75	-7	-6.5	-6.25	-7	-5.75	-7
		76.72	-10.75	-10.25	-11.75	-11.5	-11	-11.25	-11.5	-10.25	-11.75				76.72	-6.25	-6.5	-7	-7.5	-6.5	-6.5	-6.75	-5.75	-6.75
		76.76	-10.75	-10.25	-11.5	-11.5	-11.25	-11.25	-11.25	-10.75	-11.25				76.76	-6.5	-6.5	-6.5	-7.25	-6	-6.75	-6.25	-6	-6.5
		76.8	-10.25	-9.75	-10.75	-11	-10.75	-11.25	-11	-11.25	-11				76.8	-6	-6	-6	-6.75	-5.5	-7	-6.25	-7	-6.5
		76.84	-10.25	-10	-10.75	-11.25	-10.75	-10.5	-10.75	-11	-10.75				76.84	-6	-6	-6.25	-6.25	-6	-6.5	-6.25	-7.5	-6.75
		76.88	-10.5	-10.75	-10.75	-11	-11.25	-10.75	-11.25	-11	-10.75				76.88	-5.75	-6.25	-6.75	-6	-6.75	-6.5	-6.5	-7	-6.75
		76.92	-10.25	-10.75	-11	-10.5	-11.5	-11	-11.25	-12	-11				76.92	-6.25	-6.25	-6.75	-6.25	-7	-6.5	-6.75	-6.75	-6.75
		76.96	-10.5	-10.75	-11	-10	-11.5	-11	-11	-11.75	-11				76.96	-6.25	-6.5	-6.5	-6	-6.75	-6.75	-6.5	-6.25	-6.75
		77	-10.5	-10.75	-11	-10	-10.75	-11	-11	-11.5	-11.5				77	-6.25	-6	-6.5	-6.25	-6	-6.75	-6	-6.5	-7
		77.04	-10.75	-10.5	-11	-10.75	-10.25	-11.5	-11	-10.75	-11.5				77.04	-6.25	-5.75	-6.5	-6.5	-6	-6.5	-6.25	-6.75	-7
		77.08	-11.25	-10.25	-10.75	-11.25	-10	-11.75	-10.75	-10.25	-10.75				77.08	-6.5	-6	-6	-6.5	-6.25	-6.5	-6.5	-6	-6.75
		77.12	-11	-10.25	-10.75	-11.25	-11	-11.75	-10.5	-10.25	-10.5				77.12	-6.5	-6.25	-6.25	-6.75	-6.75	-6.5	-6.25	-5.75	-6.5
		77.16	-10.75	-10.75	-11	-11.25	-11.75	-11.5	-10.5	-10.75	-10.5				77.16	-6.5	-6.5	-6.25	-6.75	-6.75	-6.5	-6.25	-6	-6.5
		77.2	-10.75	-11	-10.75	-11.25	-11.5	-10.75	-11.25	-11.25	-11				77.2	-6.5	-6.75	-6.25	-6.5	-6.5	-6.25	-7	-6.25	-6.75
		77.24	-10.75	-10.75	-10.75	-10.75	-11	-10.75	-11.25	-11.25	-11.25				77.24	-6.75	-6.25	-6.5	-6	-6.75	-6.25	-7.25	-6.5	-6.75
		77.28	-10.75	-10.75	-11.25	-10.5	-10.25	-10.75	-11	-11	-12				77.28	-6.75	-6.25	-6.75	-6	-6.25	-6.25	-7	-6.5	-7.25
		77.32	-10.75	-10.5	-10.5	-11.25	-10	-10.75	-10.75	-11	-11.75				77.32	-6.5	-6.25	-6.5	-6.25	-5.5	-6.25	-6.75	-6.25	-6.75
		77.36	-10.5	-10.25	-10.5	-11.25	-11	-10.75	-11.25	-11.5	-11.25				77.36	-6.25	-6.5	-6.25	-6.25	-5.75	-6.25	-6.5	-6.5	-6.75
		77.4	-10.5	-10.25	-10.75	-10.5	-11.25	-10.75	-11.25	-11.5	-11				77.4	-6.25	-6.25	-6.25	-6	-6.5	-6.5	-6.5	-6.25	-6.75
		77.44	-10.75	-10.75	-11	-10.25	-11.25	-11	-11	-11.75	-11.25				77.44	-6.5	-6	-6.25	-6.25	-6.5	-6.75	-6.5	-6.25	-6.5
		77.48	-10.5	-10.75	-10.5	-11	-11	-10.75	-10.75	-11.5	-11.25				77.48	-6.5	-6.25	-6.25	-7	-6.5	-6.75	-6.5	-6.75	-6.25
		77.52	-10.5	-10.5	-10.5	-11.25	-11	-10.75	-10.5	-11	-11.5				77.52	-6.5	-6.5	-6.5	-7.25	-6.75	-6.75	-6.5	-6.75	-6.5
		77.56	-10.25	-10.75	-11	-11.25	-11	-10.75	-11	-11	-11.5				77.56	-6	-6.5	-6.5	-7.25	-7	-6.5	-7	-6.5	-6.75
		77.6	-10.25	-11.25	-10.75	-10.5	-10.75	-11	-11.5	-10.75	-11.25				77.6	-5.75	-6.5	-6.5	-6.75	-6.75	-6.75	-7	-6.5	-6.75
		77.64	-10	-11.25	-10	-10.5	-10	-10.75	-11.5	-11	-10.75				77.64	-5.75	-6.25	-6.25	-6.75	-6	-6.5	-7	-6.5	-6.5
		77.68	-10.75	-10.75	-10	-10.75	-10.25	-11	-11.25	-11.25	-10.5				77.68	-6	-6	-6	-6.75	-6	-6.5	-6.5	-6.75	-6.25
		77.72	-10.75	-10.75	-10.5	-10.25	-10.5	-11.5	-11	-11.25	-10.75				77.72	-5.75	-6	-6	-7	-6.25	-6.25	-6.5	-7.25	-6.25
		77.76	-10.25	-10.25	-10.75	-10.5	-10	-10.75	-10.75	-11	-11.25				77.76	-6	-5.75	-6.5	-6.75	-6	-5.75	-6.5	-6.75	-6.5
		77.8	-10.25	-10.25	-11	-10.75	-10.5	-10	-11	-11.5	-11.25				77.8	-5.75	-6	-6.75	-6.25	-6	-5.75	-6.25	-7	-6.75
		77.84	-10.5	-10.5	-11	-11	-10.75	-10.25	-11	-11.5	-11.25				77.84	-6	-6.5	-7.25	-6.75	-5.75	-6.75	-6.5	-6.75	-6.5
		77.88	-10.75	-10.25	-11	-10.75	-10.75	-10.75	-10.75	-11	-10.75				77.88	-6.5	-6.25	-7	-6.75	-6	-7	-6.5	-6.25	-5.5
		77.92	-10.5	-10.5	-11.25	-11	-10.75	-10.75	-10.5	-10.75	-11				77.92	-6.5	-6.25	-6.75	-6.75	-6.5	-6.5	-6.25	-6	-5.5
		77.96	-9.5	-10.5	-10.75	-10.75	-10.75	-11	-10.75	-10.5	-11				77.96	-6	-6.25	-6.5	-6.5	-7	-6.5	-6.25	-6	-6
		78	-9.75	-10.25	-10.5	-10.75	-11.25	-11.25	-10.75	-10.5	-11.75				78	-6	-6.25	-6.75	-6.25	-7	-6.5	-6.25	-6.5	-7
		78.04	-10.5	-10	-10.75	-10.5	-11.25	-11.75	-10.75	-11.25	-11.75				78.04	-6.25	-6	-7.25	-5.75	-6.75	-6.75	-6.5	-7	-7.25
		78.08	-10.5	-10.75	-11	-10.5	-11.5	-11.25	-11	-11.75	-11.5				78.08	-6	-6.5	-7.25	-6.25	-7	-6.75	-7	-7.25	-6.75
		78.12	-10.75	-11	-11.25	-11	-11.25	-11	-11.25	-11.75	-10.75				78.12	-6.5	-6.75	-6.75	-7	-6.75	-6.5	-7.25	-7	-6.25
		78.16	-11	-11.25	-11.25	-11.25	-11	-10.25	-11.25	-10.75	-11				78.16	-6.75	-7	-6.5	-7.5	-6.75	-6.25	-7	-6.5	-6.5
		78.2	-10.5	-11.5	-11	-11	-11	-10.5	-11.5	-10.5	-11.25				78.2	-6.25	-6.5	-6.25	-7.25	-6.5	-6.5	-6.75	-6.25	-7
		78.24	-10.75	-11.25	-11	-10.25	-11	-10.75	-11	-11	-11.25				78.24	-6.5	-6.25	-6.25	-6.5	-6.5	-6.75	-6.75	-7	-7.25
		78.28	-10.75	-11	-11	-10.25	-11.25	-10.75	-11.25	-11.25	-11.25				78.28	-6.5	-6.75	-6.75	-6.25	-6.5	-6.5	-7	-7	-7
		78.32	-10	-10.5	-10.75	-10.25	-10.75	-11	-12	-11.25	-11				78.32	-5.75	-7.25	-6.5	-6.5	-6.25	-6.5	-7.25	-6.25	-6.5
		78.36	-10	-11	-10.25	-10.5	-11	-10.75	-11.75	-11.25	-11.5				78.36	-6	-7.25	-6.5	-6.75	-5.75	-5.75	-7	-6.25	-7
		78.4	-10.25	-10.75	-10.25	-10.5	-11.5	-11.25	-11.25	-11	-11.75				78.4	-6.25	-6.25	-6.5	-6.25	-6	-5.75	-6.75	-6.25	-7
		78.44	-10.25	-10.5	-9.75	-10.75	-11	-10.75	-10.75	-10.5	-11.75				78.44	-6.25	-6	-6	-6.25	-6.25	-6	-6.75	-6	-7
		78.48	-10.25	-10.5	-10	-11	-11	-10.25	-11	-10.75	-11.25				78.48	-6.5	-6.25	-6	-6.25	-6.25	-6	-6.75	-6.25	-6.75
		78.52	-10.25	-10	-10.5	-10.75	-10.75	-10.75	-11.5	-10.75	-11.25				78.52	-6.75	-6	-6	-6	-6	-6.25	-6.75	-6.5	-6.25
		78.56	-10.5	-9.5	-11	-11	-10.75	-11	-11.5	-10.5	-11				78.56	-6.5	-5.75	-6.25	-6.25	-6.5	-6.25	-6.75	-6.75	-6
		78.6	-10.5	-10	-10.75	-11.25	-10.5	-11.75	-11.25	-10.75	-10.75				78.6	-6	-6.5	-6.5	-6.75	-6.5	-6.75	-6.5	-6.75	-6.25
		78.64	-10.25	-10.75	-10.75	-11	-11	-11.5	-11.25	-11.25	-10.5				78.64	-6.25	-6.5	-6.25	-7.25	-6.75	-7	-6.25	-7	-6.5
		78.68	-10.5	-11	-11	-10.75	-11	-11.25	-11.5	-11.75	-10.75				78.68	-6.25	-6.75	-6.5	-6.5	-6.25	-6.75	-6.5	-6.75	-6.25
		78.72	-11	-11	-10.5	-10.75	-11.25	-11	-11.5	-11	-10.75				78.72	-6.75	-7	-6.25	-6.5	-6.75	-6.75	-6.25	-6.25	-6.25
		78.76	-11.25	-11	-10.75	-11.25	-11.25	-10.75	-11.25	-11.75	-11.5				78.76	-7	-6.75	-6.25	-6.75	-7.25	-6.75	-6.5	-6.75	-7
		78.8	-10.75	-11	-11.25	-11.75	-10.75	-11	-11	-11.75	-11.75				78.8	-6.75	-6.75	-6.75	-7	-7.25	-6.5	-6	-6.75	-7
		78.84	-10.5	-11.5	-11.5	-11.5	-10.75	-11.5	-11	-11	-11.5				78.84	-6.25	-6.5	-7.25	-7	-7	-6.5	-6.5	-6.5	-6.75
		78.88	-10.25	-11.5	-11.75	-11.25	-10.75	-11.5	-11	-10.5	-10.75				78.88	-6	-6	-7.5	-7	-6.5	-6.75	-6.5	-5.75	-6.75
		78.92	-10.5	-11.25	-11.25	-11	-10.75	-11.5	-10.75	-10.75	-11				78.92	-6	-5.75	-6.75	-7	-6	-6.75	-6	-5.75	-7.25
		78.96	-10.75	-10.75	-10.5	-10.5	-10.75	-10.75	-10.75	-11	-11.25				78.96	-6	-5.5	-6.25	-6.25	-6	-6	-6.25	-6.25	-6.75
		79	-10.75	-10.5	-10.25	-10.25	-11	-10.5	-10.5	-11	-11				79	-6.5	-5.75	-6.25	-6.5	-6.25	-6	-6	-6.5	-6.5
		79.04	-10.25	-10.25	-10.5	-10.5	-11.75	-11	-10.25	-10.75	-11				79.04	-6.75	-5.75	-6.25	-6.5	-6.5	-6.5	-6.25	-6.5	-6.5
		79.08	-10	-10.5	-10.75	-10.5	-11.5	-11	-10.5	-10.75	-11.75				79.08	-6	-5.75	-6.25	-6.5	-6.5	-6.5	-6.5	-6	-7
		79.12	-10	-10.75	-10.75	-10.75	-11	-11.25	-11	-11	-11.5				79.12	-5.75	-6	-6.25	-6.5	-6.5	-6.5	-6.75	-6.5	-6.75
		79.16	-10.25	-11	-11.25	-10.75	-10.5	-11	-11.25	-11	-11				79.16	-6	-6.5	-7	-6.75	-6.25	-6.25	-7	-6.75	-6.5
		79.2	-10.25	-11	-10.75	-11	-10.5	-11	-11.5	-10.5	-11				79.2	-6.25	-6.5	-6.75	-7.25	-6	-6.25	-7.25	-6.25	-6.75
		79.24	-10.5	-11	-10.75	-11.25	-10.75	-11	-11.5	-10.25	-10.75				79.24	-7	-6.5	-6.5	-7.25	-6	-6.5	-6.5	-6.25	-6.75
		79.28	-10.75	-10.25	-10.75	-11.5	-11	-11	-11.5	-10	-10.5				79.28	-7.25	-6.5	-6.5	-7.25	-6.5	-6.5	-7	-6.25	-6.25
		79.32	-11	-10.25	-10.75	-11.25	-11.5	-11.25	-11.5	-10.5	-11				79.32	-7.25	-6.5	-6.5	-7	-6.75	-7.25	-7	-6.5	-6
		79.36	-10.75	-10.75	-11	-10.75	-11	-11	-11.25	-10.75	-10.5				79.36	-6.75	-6.25	-6.5	-6	-7	-7	-7	-6.5	-5.75
		79.4	-10.75	-10.5	-11.5	-10.25	-10.75	-11	-11.5	-11.25	-11				79.4	-6.5	-6	-7	-5.5	-7	-6.25	-7	-7	-6.25
		79.44	-10.75	-10.75	-11.25	-10.5	-10.75	-11	-11	-11	-11.25				79.44	-6.25	-6.25	-6.75	-6.25	-6.75	-5.75	-6.5	-7.25	-6.5
		79.48	-10.5	-11	-11.25	-11.25	-10.75	-11	-11.25	-11.75	-11.5				79.48	-6	-6.5	-6.75	-6.75	-6.25	-5.75	-7	-7.25	-6.75
		79.52	-10.25	-11.25	-11.25	-11.25	-10.75	-11.25	-11.25	-11.5	-11				79.52	-5.75	-6.25	-6.5	-6.75	-6.25	-6.5	-7	-6.75	-6.75
		79.56	-10.25	-10.5	-11.25	-11.25	-10.75	-11.5	-11.25	-10.75	-11.25				79.56	-5.5	-6	-6.5	-7	-6.25	-6.75	-6.5	-6.25	-7
		79.6	-10.25	-10.5	-11	-11	-11	-12	-11.25	-10.75	-11.25				79.6	-5.75	-6.25	-6.75	-6.75	-6.5	-6.5	-6.5	-6.25	-6.5
		79.64	-10.5	-10.75	-11	-10.75	-11.25	-11.5	-11	-11	-11.25				79.64	-6.25	-6.5	-6.75	-6.25	-6.25	-6.25	-6.75	-5.75	-6.5
		79.68	-10.5	-10.75	-10.75	-11.25	-11	-11.25	-11.25	-10.75	-11.25				79.68	-6	-6.5	-6.5	-6.25	-6.25	-6.75	-7	-5.5	-6.75
		79.72	-10.75	-10.75	-11	-11.5	-10.75	-10.75	-11.25	-10.5	-11				79.72	-6	-6.5	-6.25	-6.5	-6.25	-6.25	-6.5	-5.5	-6.5
		79.76	-10.25	-10.25	-10.75	-11.5	-10.75	-10.75	-11	-10.75	-10.75				79.76	-6.25	-6.5	-6	-6.75	-6.5	-6.25	-6.5	-6.5	-6.5
		79.8	-10.75	-10.75	-11	-11.75	-11	-10.75	-10.75	-10.75	-11.25				79.8	-6.75	-6.75	-6.25	-7	-6.5	-6.25	-6.75	-7	-6.5
		79.84	-10.75	-10.75	-11.25	-11.5	-10.75	-10.75	-10.5	-11	-11.25				79.84	-6.75	-6.75	-6.75	-7.5	-6.25	-6.5	-6.75	-6.75	-6.25
[truncated: 8,325 more rows]
