# Supplementary material for: Conserved allosteric inhibition mechanism in SLC1 transporters
Source: eLife. 2023 Mar 1;12:e83464. doi: 10.7554/eLife.83464 (PMC10017108; doi:10.7554/eLife.83464)
Supplement: Figure 6—source data 1. [file elife-83464-fig6-data1.xlsx]

## Sheet: Sheet1
Figure 6 original data		rASCT2WT-UCPH
Figure 6A	WT-Ser				Figure 6B	WT-UCPH					Figure 6C	rASCT2WT-UCPH dose dependent curve																																			Figure 6D	UCPH blocking effect
							Current(pA)
		Current(pA)					100µM Ser	100µM Ser+	100µM Ser+																																							200µM UCPH
	Time (ms)	10µM Ser	200µM Ser	1000µM Ser		Time (ms)	control	100µM UCPH	200µM UCPH			100µM Ser	Relative current (n=30)																																			[Ser](µM)	exp1
	0	-44.5	-47	-56.25		0	-193	-186.75	-186.25			[UCPH](µM)	exp1	exp2	exp3	exp4	exp5	exp6	exp7	exp8	exp9	exp10	exp11	exp12	exp13	exp14	exp15	exp16	exp17	exp18	exp19	exp20	exp21	exp22	exp23	exp24	exp25	exp26	exp27	exp28	exp29	exp30	ave	std				100(n=29)	0.509804
	2.5	-41.5	-51	-54.5		2	-189.5	-188.25	-185.75			0	-1	-1	-1	-1	-1	-1	-1	-1	-1	-1	-1	-1	-1	-1	-1	-1	-1	-1	-1	-1	-1	-1	-1	-1	-1	-1	-1	-1	-1	-1	-1	0				200(n=14)	0.522388
	5	-44.75	-49.5	-49.75		4	-188.75	-187.75	-186.5			10		-0.916667	-1	-0.944444	-0.861111	-0.944444	-0.944444	-0.931818	-0.931818	-0.945205	-0.927536	-1		-0.897959	-1.07317	-0.986301	-1.02857	-0.925926	-0.945946	-0.913043	-1	-0.933333							-0.861111		-0.948231	0.0515942				300(n=10)	0.357143
	7.5	-43.25	-50.75	-53		6	-189.5	-191.5	-188			50	-0.784314	-0.75	-0.837209	-0.777778	-0.666667	-0.796296	-0.796296	-0.818182	-0.818182	-0.726027	-0.768116		-0.804878	-0.714286	-0.853659	-0.657534	-0.685714	-0.759259	-0.666667	-0.695652		-0.7								-0.717949	-0.752127	0.0600487				1000(n=9)	0.515152
	10	-43.5	-49.75	-52.75		8	-193.25	-187.25	-191.75			200	-0.490196	-0.472222	-0.581395	-0.472222	-0.444444	-0.537037	-0.462963	-0.659091	-0.522727	-0.589041	-0.594203	-0.658537		-0.591837	-0.57971	-0.438356	-0.485714	-0.481481	-0.464286	-0.592593	-0.566667	-0.5	-0.449275	-0.564103	-0.666667	-0.633333	-0.666667	-0.666667	-0.583333	-0.615385	-0.552764	0.0762046
	12.5	-48.5	-53.5	-59.75		10	-191.5	-191	-192
	15	-44.75	-48.75	-54.75		12	-191.25	-193.75	-187.5
	17.5	-44.75	-47.25	-54.5		14	-193.75	-184.75	-189.25
	20	-42.5	-55	-56.25		16	-190.25	-191.25	-189
	22.5	-44.75	-46.75	-53.75		18	-194.75	-190.5	-191.25
	25	-48.5	-49.25	-58.75		20	-194.25	-191.25	-189
	27.5	-42.5	-52.75	-52.75		22	-193.25	-188.75	-194.75
	30	-49.5	-51.5	-51.5		24	-188.5	-185.25	-192.5
	32.5	-44	-48.5	-55		26	-193	-191.5	-191
	35	-47	-48.5	-53.5		28	-193.25	-185	-189
	37.5	-43.5	-54.25	-53		30	-190.25	-192	-192.75
	40	-41	-51.75	-52.5		32	-190.5	-190.25	-187
	42.5	-43.75	-51.25	-53		34	-196	-189.75	-191.75
	45	-43.75	-52	-55		36	-191.25	-188.25	-188
	47.5	-47	-49	-53		38	-198.25	-190.75	-191.25
	50	-46.5	-45.25	-61		40	-194	-191	-190.75
	52.5	-44.25	-49.75	-57.25		42	-192.75	-187.75	-189.5
	55	-49	-52.5	-52.75		44	-193.5	-185.5	-190
	57.5	-48.25	-52	-53.25		46	-193.25	-186	-193.75
	60	-45.5	-54.5	-53.25		48	-193.75	-192.5	-191.5
	62.5	-45.75	-51.25	-53.75		50	-190.75	-192.25	-188.25
	65	-49.25	-45.25	-55.75		52	-191.75	-192.5	-191.25
	67.5	-42.25	-49.5	-52.5		54	-188	-189.5	-192.25
	70	-47	-50.75	-53.75		56	-191.75	-196	-192.75
	72.5	-41	-51	-54.5		58	-191.75	-190.75	-193
	75	-41.5	-52	-55.75		60	-193.75	-188	-190
	77.5	-47	-47.75	-56		62	-188.5	-187.5	-190
	80	-48.5	-50.75	-54		64	-192.25	-184.5	-184
	82.5	-47.25	-47.75	-53.75		66	-191.75	-190	-187.25
	85	-49.5	-47.5	-55.5		68	-190.75	-188.25	-193.5
	87.5	-42	-48	-56		70	-190.5	-193.25	-188
	90	-41.75	-52.5	-51.5		72	-196.5	-190.75	-192.5
	92.5	-43.75	-51.75	-50		74	-194.25	-193	-190.5
	95	-47.75	-50.25	-51.25		76	-192.5	-188	-184.5
	97.5	-45.25	-51	-55.5		78	-194.25	-195.5	-193
	100	-44.75	-44.75	-56		80	-194.75	-192.75	-186.25
	102.5	-43	-48	-55		82	-189.5	-189.5	-187
	105	-40.5	-48.75	-51.75		84	-190.25	-189	-189.5
	107.5	-43.25	-53.5	-53		86	-191.5	-193.5	-194.25
	110	-41.5	-50.5	-51.25		88	-188	-191	-186.25
	112.5	-45	-51.25	-53.5		90	-187.5	-188.25	-189.5
	115	-47.75	-49	-58		92	-189.5	-188.75	-191
	117.5	-47	-51.25	-53		94	-188.75	-187.5	-182.25
	120	-41.25	-50.5	-57.75		96	-192.5	-184.75	-194.5
	122.5	-42.25	-49.25	-53.5		98	-185.75	-191.75	-194
	125	-47.5	-50.75	-54.5		100	-188.25	-184	-193.25
	127.5	-49.5	-48.75	-57		102	-194.75	-191	-187.5
	130	-45.5	-48.25	-54.25		104	-194	-189.75	-194.5
	132.5	-49.5	-45.25	-53.75		106	-188.25	-190.75	-193
	135	-43.25	-51.5	-54.75		108	-185.5	-192.75	-193.75
	137.5	-40.5	-49.75	-51.25		110	-190.5	-189.25	-188.75
	140	-42.75	-49.25	-50.25		112	-189.5	-188.5	-189
	142.5	-47.5	-52.75	-57		114	-191.5	-188.25	-191.75
	145	-45.75	-52.5	-51		116	-187.75	-191.25	-191.25
	147.5	-45.75	-52.5	-57		118	-193.75	-189.5	-189.75
	150	-50.5	-41.75	-55.5		120	-186.75	-190.25	-191.25
	152.5	-42.75	-48	-54.5		122	-192.25	-184.75	-190
	155	-48.5	-51.25	-49		124	-198.75	-191.25	-192.75
	157.5	-46.5	-49	-49.75		126	-196.25	-191	-196
	160	-45.5	-49.25	-48		128	-190.75	-189.25	-191.25
	162.5	-46.25	-49	-54.25		130	-190	-190	-187
	165	-44.75	-48.25	-54.5		132	-194.5	-192.75	-190.5
	167.5	-46.75	-46.5	-56.25		134	-193.5	-189.75	-190.25
	170	-43.5	-51	-52.5		136	-194.25	-191.25	-194.75
	172.5	-45.25	-49	-51.75		138	-189.25	-190.75	-191.25
	175	-43.75	-49	-56		140	-192.75	-191.75	-192.75
	177.5	-38.5	-54.5	-51.25		142	-186	-190	-187.75
	180	-49.75	-48.5	-56.75		144	-190	-190.25	-191
	182.5	-43.25	-50	-55.75		146	-187	-192.5	-187
	185	-41.25	-50.75	-56.75		148	-195.25	-193.25	-193.5
	187.5	-43.75	-48	-47.75		150	-190.5	-194	-189.5
	190	-40.5	-49	-48.75		152	-189.25	-193.25	-190
	192.5	-51	-46.5	-52.5		154	-194.5	-191.75	-192
	195	-44.75	-48.25	-56.25		156	-194.25	-191.75	-187
	197.5	-46.25	-50	-51.5		158	-190	-190.5	-188.5
	200	-44.25	-49.25	-52.75		160	-192.5	-187.5	-189
	202.5	-43.25	-47.75	-54		162	-189.5	-191.25	-190.5
	205	-44.75	-49	-54.75		164	-194.25	-188.25	-194
	207.5	-43.25	-53	-56.5		166	-200	-191.75	-186.5
	210	-43.5	-50.75	-56.25		168	-191	-193	-187
	212.5	-47.5	-51	-52.5		170	-197.5	-194	-188.5
	215	-44.75	-53.5	-52.5		172	-191.25	-187	-188.75
	217.5	-49.5	-47	-55.5		174	-188.5	-190.25	-191.75
	220	-44.25	-49.25	-53.75		176	-192.75	-192.25	-191.25
	222.5	-48.75	-48.5	-51		178	-193	-189.5	-189
	225	-47	-49	-51.25		180	-190.5	-194.25	-193.25
	227.5	-44.75	-48.75	-55		182	-189	-195	-190.75
	230	-47.75	-47.5	-53.75		184	-195.25	-192	-188.5
	232.5	-46.5	-45	-53.75		186	-188.5	-192.25	-190.5
	235	-47.5	-46.25	-52		188	-197	-191.75	-192.75
	237.5	-45.25	-53.5	-54		190	-195.5	-187.5	-193.5
	240	-44.5	-52	-51.25		192	-193	-185.25	-192.25
	242.5	-43	-50.25	-52.75		194	-197	-191.75	-190
	245	-43.75	-49	-60		196	-190.25	-191.25	-192.5
	247.5	-50.25	-49.25	-51.5		198	-189.25	-192	-190.25
	250	-47.75	-44.5	-53.75		200	-191.5	-187.75	-194.5
	252.5	-47.75	-45.5	-48.25		202	-191	-190.25	-189
	255	-45.25	-47.75	-52.25		204	-195.25	-191.5	-188.75
	257.5	-47.75	-50.5	-52		206	-197.5	-191.75	-195
	260	-46.5	-49.75	-56.5		208	-190.25	-191.5	-188
	262.5	-49.25	-50.25	-55.75		210	-195.25	-193.75	-194.5
	265	-47	-45	-56.25		212	-195	-189.5	-195
	267.5	-44.25	-49	-55		214	-192.75	-189.5	-196.5
	270	-44.25	-46.25	-53		216	-191	-193.25	-192.75
	272.5	-45	-51.5	-50.5		218	-192.25	-189.75	-190.75
	275	-46.5	-49	-52.75		220	-188	-190	-195.25
	277.5	-46.25	-50.75	-53.5		222	-188.75	-191.5	-194.5
	280	-50.75	-47.25	-55		224	-186.75	-191.5	-191
	282.5	-47.25	-46	-55		226	-194	-189	-191.25
	285	-45	-48	-50.75		228	-192.75	-188.25	-189.5
	287.5	-45.75	-52.5	-52.25		230	-192.75	-194.75	-189.75
	290	-47.75	-51.25	-48.75		232	-193.5	-185.75	-189.75
	292.5	-41.75	-54	-49		234	-193.5	-195.75	-190.75
	295	-48.25	-50.75	-50.75		236	-193.75	-192.25	-192.25
	297.5	-46	-49	-57.5		238	-190.5	-192.75	-193
	300	-42.25	-45.5	-53		240	-189.5	-188.5	-191
	302.5	-41.5	-48.5	-52.5		242	-188.75	-189	-190
	305	-43.25	-54.5	-47.75		244	-190.25	-189.25	-192.75
	307.5	-46.75	-52.5	-48.5		246	-191.5	-187.25	-191.75
	310	-46.5	-51.75	-49.75		248	-192.25	-188.75	-192.25
	312.5	-47.5	-53.5	-52.25		250	-192.75	-195.5	-195
	315	-47	-47.5	-52		252	-190	-194.75	-195.25
	317.5	-48.25	-50	-50.75		254	-191	-191	-189.75
	320	-44.25	-49.25	-51.75		256	-196.25	-185	-191.75
	322.5	-43.5	-49	-46.25		258	-195.75	-193.5	-192.25
	325	-43	-52.25	-51.5		260	-193	-188.5	-192.25
	327.5	-45.75	-48.25	-52.75		262	-193.25	-195.25	-192.25
	330	-48	-52.25	-53.25		264	-195.75	-189.25	-193.5
	332.5	-48.25	-46.75	-50.75		266	-192.5	-189	-190.75
	335	-46.75	-47.5	-51		268	-192	-189	-195.25
	337.5	-43	-46.5	-54.25		270	-196.25	-187.5	-193
	340	-41.5	-56	-52.75		272	-198.25	-194	-189.25
	342.5	-44.75	-50	-53.75		274	-191.75	-189	-193.5
	345	-44	-46.75	-53.25		276	-190.5	-193	-193
	347.5	-48.25	-54	-56		278	-193.25	-189.5	-192.5
	350	-48	-49	-51.5		280	-195.25	-195	-192.5
	352.5	-47.25	-48	-53.25		282	-199.5	-194	-186.5
	355	-44.5	-50.75	-51.25		284	-197.75	-190.75	-188
	357.5	-41.75	-53.75	-50.75		286	-193	-196.75	-188.5
	360	-41.75	-50.75	-49.75		288	-190.25	-189.5	-193.5
	362.5	-45.25	-49.5	-50.75		290	-191.25	-189.75	-190.5
	365	-48.25	-47.5	-51.75		292	-195.25	-193.25	-188
	367.5	-44.25	-48.5	-52.25		294	-192	-188	-192.75
	370	-46.75	-49.5	-49.75		296	-190.5	-197	-189
	372.5	-42.25	-51.5	-48.25		298	-194.5	-188.5	-191
	375	-45.25	-52.75	-53		300	-191.25	-189.75	-188
	377.5	-44.5	-52.25	-51		302	-193.25	-189.5	-190
	380	-48	-48.75	-49.75		304	-197	-189.75	-192
	382.5	-48	-44.75	-54		306	-196.5	-193.75	-188.5
	385	-44.75	-50.25	-56		308	-190.5	-185	-191.25
	387.5	-42.25	-51.75	-49		310	-196	-187.5	-190.5
	390	-46.5	-50	-47.5		312	-190	-188.5	-191
	392.5	-43	-59.5	-52		314	-192.5	-191.75	-193.75
	395	-43.25	-56.5	-50.5		316	-194.5	-191.75	-187.75
	397.5	-49.25	-51	-55.5		318	-193.75	-194.5	-186.5
	400	-45.75	-48.75	-53.5		320	-194	-188.25	-188
	402.5	-40.25	-50	-52.5		322	-192.25	-193	-187.25
	405	-44.25	-55.25	-54.25		324	-195.25	-190.75	-191.25
	407.5	-40.75	-51.5	-54.25		326	-193.25	-185.75	-192.75
	410	-46.5	-52.75	-53.75		328	-195	-189.5	-194.25
	412.5	-45.75	-49.5	-54.75		330	-188.5	-188.5	-191.25
	415	-49	-47.75	-54.5		332	-194.25	-189.75	-190.25
	417.5	-47.25	-49	-54.25		334	-198.5	-192.25	-189.5
	420	-43	-49.25	-49.5		336	-195.25	-197.75	-188
	422.5	-48.5	-47.75	-48.5		338	-190.5	-189.25	-190.5
	425	-44	-48	-50.25		340	-190.75	-188	-192.5
	427.5	-48	-52.75	-55.5		342	-193.75	-186.25	-185.75
	430	-45.75	-49.75	-54.75		344	-190.75	-192	-187.25
	432.5	-47	-49.75	-52.25		346	-189.5	-194.75	-192.75
	435	-44.75	-48	-51		348	-193	-191.25	-188.5
	437.5	-42.25	-52	-55		350	-196.5	-191.5	-188
	440	-41.25	-51.25	-49		352	-194	-196.75	-191
	442.5	-41.5	-51.25	-54		354	-194.25	-190	-189.75
	445	-45.25	-47.25	-52.25		356	-194.5	-188	-191
	447.5	-41.25	-47.75	-55		358	-191	-187.5	-191
	450	-46.5	-48.5	-53.5		360	-191	-191.75	-192.25
	452.5	-45.25	-50.25	-53.5		362	-187.75	-192.25	-186
	455	-43.5	-50.5	-52.5		364	-194.25	-189.5	-195.5
	457.5	-41.75	-54.75	-46		366	-194.75	-190.25	-186.5
	460	-41.5	-53.75	-51.5		368	-192	-193.25	-191.75
	462.5	-45	-48.75	-53		370	-193	-190.75	-191.5
	465	-47	-45.5	-54.75		372	-200	-190	-193
	467.5	-42.5	-46.75	-52.75		374	-192.75	-189.75	-189.25
	470	-46	-47	-50.25		376	-195.5	-185.75	-189.75
	472.5	-46	-49.75	-46.5		378	-197.75	-184.5	-189
	475	-41.5	-50.5	-49.75		380	-188.25	-193	-193.25
	477.5	-44	-50	-50.75		382	-194.5	-194.25	-191.25
	480	-44	-42.75	-54		384	-188.75	-191	-187.75
	482.5	-45.25	-43.5	-52		386	-190.25	-190.25	-187.5
	485	-43.25	-46.75	-49.75		388	-197	-189.5	-189.75
	487.5	-44.25	-50.5	-47.5		390	-192.25	-189.75	-188.75
	490	-43.5	-49	-54.25		392	-198.5	-192.75	-191.75
	492.5	-41.75	-49.75	-54		394	-191	-188	-191.75
	495	-47.5	-47.5	-52.25		396	-196.5	-186	-187.5
	497.5	-52.5	-53.75	-55.25		398	-192	-190.25	-191
	500	-42.75	-48.5	-51.5		400	-198.5	-190.75	-192.5
	502.5	-43.5	-47.5	-50.75		402	-190.75	-187.25	-190.5
	505	-40.25	-50.5	-53.5		404	-193.5	-184.75	-192
	507.5	-43.75	-50.75	-51.5		406	-195	-190.25	-191
	510	-42	-48.75	-54		408	-187.5	-187.75	-192.25
	512.5	-41	-47.5	-56.5		410	-194.75	-182.5	-188.75
	515	-48.5	-48.75	-53.5		412	-193.25	-187.25	-192.25
	517.5	-41	-46.25	-49.5		414	-190	-191.5	-191.5
	520	-47.25	-50	-49.5		416	-193.25	-186.5	-192.5
	522.5	-43.25	-47.5	-54.75		418	-194	-186.75	-184.75
	525	-43.75	-51	-52.25		420	-194.25	-188.75	-192.25
	527.5	-45.75	-54.25	-50		422	-195.75	-185	-195.5
	530	-46.75	-51	-50		424	-191.5	-184.25	-193.75
	532.5	-43	-46.75	-54		426	-192.75	-188.5	-192.75
	535	-41	-51.5	-51		428	-196.75	-187.75	-188
	537.5	-42.75	-48.75	-54.5		430	-193.5	-188.25	-195.25
	540	-39	-49.75	-49.25		432	-196.75	-187.5	-191.25
	542.5	-40.25	-54	-52.75		434	-191.75	-192.25	-191
	545	-43.75	-52.75	-56.25		436	-194.5	-195	-191
	547.5	-46.25	-52.25	-53.75		438	-194	-189.5	-188.75
	550	-44.25	-46.75	-57.75		440	-192	-184.25	-191
	552.5	-48.25	-46.25	-53.5		442	-193	-191.75	-188.75
	555	-39	-54	-52		444	-195.75	-185.75	-192.25
	557.5	-49.25	-52.25	-52		446	-190	-189.25	-191
	560	-43.75	-51	-55		448	-189.75	-192.75	-190.5
	562.5	-44.25	-48	-56.25		450	-193	-189	-192.5
	565	-43.5	-46.75	-54.75		452	-192	-186.75	-188.75
	567.5	-40.75	-47	-50.25		454	-194.75	-188	-195
	570	-41.25	-52	-54		456	-192.25	-193.25	-193.75
	572.5	-44	-49.25	-48.25		458	-194.25	-187.5	-190
	575	-45.5	-46.5	-49.5		460	-192.25	-188.25	-188.25
	577.5	-45.5	-47.75	-50.25		462	-191.75	-190.25	-191.25
	580	-45.25	-52	-55		464	-195.75	-189.5	-193.5
	582.5	-46.25	-49	-53.75		466	-192.75	-191.75	-190.5
	585	-43.25	-50.25	-49.5		468	-194.5	-193	-189.5
	587.5	-44.5	-50.25	-53.75		470	-193.5	-191.25	-186.25
	590	-43.25	-52.75	-52		472	-192	-185.5	-193.75
	592.5	-47.75	-51.75	-53.25		474	-191.75	-188.75	-191.5
	595	-40.75	-47	-53.75		476	-186.5	-191	-188.5
	597.5	-45	-47.5	-58.25		478	-191.25	-190.25	-193.25
	600	-46.75	-48.5	-55		480	-189.25	-192.5	-193.75
	602.5	-41.25	-52	-54.25		482	-192	-186.25	-192
	605	-43.25	-50.25	-49.25		484	-196	-187.75	-194.25
	607.5	-44.75	-52.25	-47.75		486	-194	-193.75	-187
	610	-41	-49.75	-54.75		488	-196.25	-194.75	-187.5
	612.5	-43.5	-48.75	-50.5		490	-189.25	-190	-192.75
	615	-46.75	-47.5	-52.25		492	-190.5	-190.5	-189.75
	617.5	-47.5	-49.25	-53.25		494	-187.75	-189.25	-194
	620	-43.5	-45.5	-55.5		496	-193.25	-191.25	-191.25
	622.5	-44.25	-47	-47		498	-194.5	-185.5	-193.25
	625	-47.5	-51.25	-48		500	-192.25	-194.5	-194.75
	627.5	-43	-48	-53		502	-192.75	-192.75	-193.75
	630	-48.25	-51	-57.25		504	-191.5	-186.25	-190
	632.5	-44.5	-48.25	-50		506	-190.5	-189.75	-187
	635	-48	-46	-51.5		508	-192.75	-188.25	-189.75
	637.5	-45	-51.75	-48.25		510	-192	-189.25	-190
	640	-40.75	-54.75	-48.75		512	-189	-188.75	-187.5
	642.5	-46.5	-53	-51		514	-191.75	-188.75	-195
	645	-44.5	-50.75	-56.5		516	-194	-184.25	-187
	647.5	-48.25	-48.75	-56.25		518	-190.75	-189.25	-190.75
	650	-44	-47.75	-51.25		520	-196.5	-191.5	-192.75
	652.5	-46	-49.75	-50.75		522	-193	-182	-189.75
	655	-41.75	-50.75	-56.5		524	-193.75	-188.25	-188.25
	657.5	-41.5	-54.5	-54.25		526	-193.5	-190.5	-190.75
	660	-47.75	-49	-52		528	-190.75	-189.5	-191.75
	662.5	-47.75	-51.75	-55.5		530	-194.5	-189.5	-191.25
	665	-43.5	-47	-52		532	-191.25	-187.25	-190.25
	667.5	-42.25	-49	-52		534	-193	-187.75	-189.75
	670	-42.25	-52.5	-49.25		536	-191.5	-187.5	-196.75
	672.5	-44	-48.75	-46.75		538	-195.25	-191	-189.75
	675	-44.25	-48	-49		540	-194.25	-191.25	-189.25
	677.5	-45	-48	-49.75		542	-193.25	-191.75	-189.5
	680	-49.5	-47.5	-47.5		544	-196	-189.5	-192.75
	682.5	-49.75	-52.75	-55.75		546	-194	-191	-192.25
	685	-48.25	-47	-55		548	-191	-188	-193.75
	687.5	-44	-45.75	-51		550	-191.5	-186.25	-191.75
	690	-40.5	-52.75	-54.75		552	-197	-194.25	-188.25
	692.5	-43	-54.5	-50.75		554	-196.5	-191.25	-193.75
	695	-45.75	-49.25	-55		556	-193.5	-188.25	-190.75
	697.5	-48	-50.5	-55.25		558	-191.75	-187.5	-187.75
	700	-51	-48.25	-48.5		560	-193.5	-193	-185.75
	702.5	-40.5	-50.75	-53.25		562	-195.75	-188.75	-185.75
	705	-41.75	-48	-47.25		564	-192	-187.25	-188
	707.5	-43	-48	-54.5		566	-194	-189.5	-191.75
	710	-45.25	-50.75	-53.5		568	-195.5	-191.25	-189.75
	712.5	-45	-50	-53.75		570	-193	-187.75	-189.25
	715	-46.5	-49.25	-57		572	-195.25	-188.75	-190
	717.5	-47	-45.75	-55.5		574	-195.75	-189.25	-190
	720	-43.25	-52.5	-52.5		576	-192.25	-189	-185
	722.5	-43	-51.75	-47		578	-194.75	-187	-190.25
	725	-45.25	-53.25	-52.25		580	-188.75	-191.5	-192.75
	727.5	-41.75	-49.5	-52		582	-195.5	-193	-192
	730	-45	-51	-49.75		584	-194.75	-194	-188.5
	732.5	-44.5	-49.25	-54		586	-190.25	-186.5	-185.5
	735	-41.5	-47.25	-51.25		588	-195.25	-189.25	-192.75
	737.5	-41.25	-52.5	-53		590	-189.5	-188.5	-184.25
	740	-42.75	-52.5	-47		592	-193.25	-190	-187.25
	742.5	-42.75	-50.75	-55.25		594	-196.5	-191.75	-190.5
	745	-47.75	-51.75	-54.75		596	-188.25	-186.75	-189
	747.5	-45.5	-51	-57.5		598	-191.25	-189.25	-190
	750	-38.75	-45	-54		600	-190.75	-191.5	-189
	752.5	-41.25	-46	-54.5		602	-194.75	-194.5	-187
	755	-42.25	-49.75	-53.25		604	-194.25	-184	-191
	757.5	-43.75	-53.5	-46.25		606	-193.5	-190	-191.25
	760	-43.5	-54.25	-52		608	-192.25	-190.5	-195
	762.5	-48.5	-47.75	-57		610	-191	-189.75	-187.5
	765	-45.25	-53.75	-49.75		612	-187.5	-189	-190
	767.5	-45.25	-51.5	-52.75		614	-188.5	-189.75	-194.75
	770	-47	-52.75	-54.25		616	-191	-187.5	-189.75
	772.5	-47.25	-49.5	-50.75		618	-194.25	-188.75	-195.25
	775	-40.75	-55	-48.75		620	-195.25	-190.5	-189.75
	777.5	-40.25	-51	-52.75		622	-192	-186.75	-189.75
	780	-44.25	-51.25	-56.25		624	-192.5	-189.75	-194.25
	782.5	-44.25	-51.5	-51.25		626	-191.25	-189.25	-191.25
	785	-42.5	-52	-53.5		628	-189.5	-188.75	-188.5
	787.5	-42.75	-50.25	-50.5		630	-191.75	-189.5	-190.25
	790	-41.5	-49.25	-49		632	-196.75	-193.75	-187.75
	792.5	-44.75	-55	-52		634	-192.75	-187.25	-190.5
	795	-44.75	-48	-51.75		636	-191.5	-193.75	-186
	797.5	-41.75	-51	-59.75		638	-195.75	-188.75	-188.5
	800	-47.75	-47.5	-55		640	-192.75	-185	-190.25
	802.5	-44.75	-48	-55.5		642	-188.5	-188	-195
	805	-39.75	-52.5	-54.5		644	-190.75	-186	-193.25
	807.5	-42.5	-47.75	-50.5		646	-194	-190.75	-187
	810	-45.5	-51.5	-49.25		648	-193	-190.5	-192.25
	812.5	-44.5	-45.25	-54		650	-194.75	-188.75	-192.5
	815	-45.5	-50	-52.75		652	-189	-193.75	-195.5
	817.5	-42.25	-49.75	-53.25		654	-191.5	-188.75	-189.5
	820	-45.75	-45.25	-55		656	-193.75	-192	-191.25
	822.5	-39	-51.75	-51		658	-192.5	-192	-190.25
	825	-44.25	-54.5	-55		660	-191.25	-189.5	-192
	827.5	-50.75	-52.75	-52.25		662	-196.25	-191.75	-188.5
	830	-43.75	-51.5	-53.75		664	-193	-191.25	-183
	832.5	-40.25	-51.5	-49.75		666	-193.75	-190.75	-188.5
	835	-45	-51.75	-50.75		668	-190.5	-189.5	-189.25
	837.5	-39	-53.5	-50.5		670	-195	-193.75	-186
	840	-41.5	-49.75	-49.25		672	-197.5	-192.5	-191.5
	842.5	-41	-54	-52.25		674	-196	-185.5	-192.25
	845	-43.75	-51.75	-52.75		676	-194	-190.75	-193.25
	847.5	-46.25	-52.25	-56.75		678	-192.75	-192	-188
	850	-41.5	-44.75	-53.25		680	-191.75	-190.5	-191.25
	852.5	-40	-49.75	-53		682	-190	-188	-188.25
	855	-42	-50	-52		684	-192	-191	-190
	857.5	-41	-49.5	-50.5		686	-193.25	-191.75	-193
	860	-43	-51.5	-54.75		688	-194.75	-193.25	-188.25
	862.5	-44.5	-47.75	-54		690	-192.25	-190.5	-191.25
	865	-46	-52	-57.5		692	-186.75	-186.75	-187.5
	867.5	-47	-47.5	-49.25		694	-191.5	-195.25	-185.5
	870	-43.25	-48.5	-50.75		696	-188	-183.75	-191.75
	872.5	-46	-51.75	-49.25		698	-188.75	-186.25	-191.25
	875	-42	-52.75	-53		700	-188.75	-190.25	-194
	877.5	-46.25	-47.5	-53.5		702	-195.5	-191.5	-185.5
	880	-46.75	-52.75	-56.5		704	-191.75	-189.5	-191.75
	882.5	-45.25	-52.5	-51.5		706	-189.5	-190.5	-192.25
	885	-40	-49	-49.75		708	-192.75	-188.5	-191.75
	887.5	-39.75	-46.5	-47.5		710	-196.25	-185	-193.25
	890	-43.25	-54.25	-50		712	-193.5	-192	-193.25
	892.5	-41.25	-55	-48.75		714	-191.75	-188.75	-192.75
	895	-40.5	-50.25	-51		716	-195	-191.25	-192.25
	897.5	-42.5	-49.25	-58.25		718	-195.25	-189.75	-189.75
	900	-44	-49	-50.25		720	-195	-188.75	-192
	902.5	-42.75	-53	-52		722	-193.75	-193.5	-192.25
	905	-44	-50.5	-48.25		724	-190.5	-190	-191.75
	907.5	-45.75	-55.25	-51		726	-191.25	-196.5	-187.5
	910	-46.25	-52.25	-50		728	-192.5	-190	-189.5
	912.5	-46	-46.25	-55.5		730	-193.75	-189.25	-190
	915	-44.5	-51.75	-60		732	-192.25	-190.75	-190.75
	917.5	-45.5	-50.75	-50.25		734	-192	-193.75	-191.75
	920	-43.5	-53.25	-53.75		736	-196.75	-186	-189.25
	922.5	-38	-51.75	-48		738	-189	-187.25	-187.75
	925	-41.75	-51.25	-50.25		740	-193.25	-188	-193.75
	927.5	-46.75	-49	-49.75		742	-195.75	-189.75	-191.75
	930	-42.5	-51.25	-56.25		744	-192.75	-193.25	-191
	932.5	-44.75	-47.5	-55.5		746	-190.25	-189.5	-197.5
	935	-42.75	-53.25	-53.75		748	-196.25	-192.5	-194
	937.5	-42.25	-52.25	-50.75		750	-191.75	-190.25	-189.5
	940	-40.25	-51.75	-53.75		752	-194.75	-191.75	-191.5
	942.5	-40.5	-52.25	-54		754	-192.75	-188	-186.75
	945	-45	-49.25	-53.5		756	-187.5	-189.25	-193.25
	947.5	-43.5	-47.75	-53		758	-192.25	-188.25	-191.5
	950	-43.25	-48	-47.5		760	-190.25	-190.25	-195
	952.5	-42.25	-48.25	-53.75		762	-191.5	-187.5	-192.25
	955	-41.75	-50	-51		764	-190	-190.25	-192
	957.5	-38.75	-50.25	-51.5		766	-193.5	-190	-192.25
	960	-42	-50.75	-50.5		768	-192.25	-193.75	-190.75
	962.5	-44.25	-53.25	-50.75		770	-193.75	-191.75	-192.25
	965	-43.75	-45.5	-55		772	-192	-190	-185.5
	967.5	-45	-46.25	-50		774	-193.75	-190.25	-187.75
	970	-41	-49.25	-51		776	-191	-192.25	-189
	972.5	-44.75	-54	-49.5		778	-192.5	-187.5	-187
	975	-42.25	-50	-49.25		780	-192	-187.75	-191.5
	977.5	-41.5	-47.25	-54.25		782	-192.75	-194.5	-192.25
	980	-40	-50.5	-52		784	-189	-193.75	-190.75
	982.5	-43.25	-48.25	-55.75		786	-195.25	-188.25	-191
	985	-41.5	-49.75	-50		788	-192	-192.25	-188
	987.5	-39.25	-48.75	-50.75		790	-193.5	-185.25	-188.5
	990	-40.5	-49	-52.25		792	-193.25	-185.5	-190
	992.5	-39.25	-52.5	-53.25		794	-190	-190.25	-190
	995	-44.75	-45.75	-49.5		796	-188	-186.5	-189.5
	997.5	-45	-48.75	-57.25		798	-193.25	-189.5	-192.5
	1000	-42.25	-48.75	-55.25		800	-191	-189.75	-189.25
	1002.5	-39.5	-45.75	-55.5		802	-194	-183.75	-187.5
	1005	-44.5	-51.75	-51		804	-190.5	-188.5	-191.5
	1007.5	-45	-48.25	-49.25		806	-195.5	-191	-189
	1010	-40.5	-49	-47		808	-194	-187.25	-192.5
	1012.5	-43.5	-51	-55.75		810	-191	-188.25	-193.25
	1015	-41.75	-45.25	-53.5		812	-192.5	-192.75	-194.75
	1017.5	-42.75	-49.25	-54		814	-193.25	-186.25	-188
	1020	-43.75	-47.5	-49.75		816	-194	-185.75	-187.75
	1022.5	-41.5	-52	-52.75		818	-194.25	-189.25	-195.25
	1025	-44.5	-53	-51.75		820	-188.75	-190.5	-191.5
	1027.5	-43	-50.25	-52.25		822	-193.25	-189.75	-189.75
	1030	-41	-49.5	-50.25		824	-190.25	-191.75	-189.25
	1032.5	-43.5	-48.75	-54.25		826	-188.25	-190.75	-187.5
	1035	-44.5	-50.25	-50.25		828	-191.5	-187.75	-193
	1037.5	-38	-48.75	-48		830	-188.5	-193.25	-186
	1040	-40.25	-49	-50		832	-193.25	-191.25	-192.25
	1042.5	-39.5	-51.5	-51.75		834	-196	-186.5	-190.75
	1045	-44.5	-50.75	-50.75		836	-193.75	-187.5	-196.75
	1047.5	-44.25	-45	-52.5		838	-190.25	-185.25	-188.25
	1050	-43.75	-50.25	-54.25		840	-188.75	-189	-190
	1052.5	-43	-50.5	-50.25		842	-189	-186	-185.75
	1055	-41.75	-47.75	-52.25		844	-193	-191.25	-192.25
	1057.5	-44.75	-50.75	-48.25		846	-192.5	-189.25	-192
	1060	-43.25	-53.25	-51		848	-190.25	-194.75	-190.25
	1062.5	-42.75	-50.25	-52.5		850	-188.25	-191.25	-186.75
	1065	-44	-50.75	-54		852	-193	-191.75	-191.25
	1067.5	-44.25	-46.25	-45.75		854	-192.25	-191	-193.75
	1070	-40	-50.75	-47.75		856	-190.25	-190.5	-187.75
	1072.5	-37.5	-45.5	-52.25		858	-197.5	-190.25	-190.75
	1075	-42	-54.75	-54.5		860	-194	-187.5	-193.75
	1077.5	-43.25	-53.25	-51.25		862	-188	-185.5	-192.75
	1080	-37.5	-49	-56		864	-190.75	-185	-195.25
	1082.5	-36.25	-44.25	-48.5		866	-195.75	-186.75	-186.25
	1085	-42.75	-47	-52.75		868	-192.5	-185.5	-190.75
	1087.5	-32.25	-40.25	-41.75		870	-189.25	-191	-192
	1090	-492	-201	-453		872	-194.75	-183.75	-188
	1092.5	-171	-65	-197.75		874	-193.25	-188.5	-188.75
	1095	37	-35.75	-10.25		876	-192	-190.5	-191.75
	1097.5	-26	-20.5	17		878	-192.25	-189.5	-188.25
	1100	-158.5	-39.25	-46		880	-186.75	-190.25	-190.25
	1102.5	-43.25	-24.25	-44.5		882	-188	-188.25	-190.75
	1105	-51.5	-56	-53.75		884	-195.5	-190.25	-192.5
	1107.5	-50.5	-49	-56.25		886	-186.75	-186	-188.25
	1110	-57.5	-53.25	-57.25		888	-163.5	-247.75	-259.75
	1112.5	-60	-52.5	-60.25		890	-184.25	-181	-179
	1115	-65.75	-55	-65.5		892	-197	-191	-185.75
	1117.5	-62.5	-49.5	-67.75		894	-191.25	-191.5	-194.75
	1120	-69.5	-51.25	-61.75		896	-192.75	-189.25	-192.25
	1122.5	-63.25	-54	-61		898	-194	-189.25	-189.5
	1125	-64.75	-50.25	-61.75		900	-193.25	-192.25	-197.25
	1127.5	-65.5	-52.25	-60.75		902	-203.5	-197.25	-190.75
	1130	-56	-47.75	-58.75		904	-203.25	-205.75	-207
	1132.5	-52.5	-49.75	-56.25		906	-197.25	-223.75	-201
	1135	-51.25	-52.25	-59		908	-201.25	-204.75	-210.75
	1137.5	-43.5	-50.75	-52		910	-199	-207.5	-212.25
	1140	-43.75	-51	-51		912	-201	-203.75	-214.5
	1142.5	-41.5	-48.75	-55		914	-200.25	-207.25	-217.25
	1145	-41.5	-51.5	-54		916	-204.75	-208.75	-209.5
	1147.5	-48.25	-48.25	-53.75		918	-205.5	-212.75	-210.25
	1150	-47.25	-50.75	-53.75		920	-201.75	-210.5	-216
	1152.5	-44.75	-53.5	-51.75		922	-202.75	-214	-209.75
	1155	-39.25	-47	-50.25		924	-203	-212.5	-211.5
	1157.5	-43	-54.25	-53.25		926	-200	-205	-208
	1160	-42.25	-49.25	-48.75		928	-201.25	-208	-205
	1162.5	-40	-48	-53		930	-197	-203.25	-207.75
	1165	-40.25	-51	-53.25		932	-197.5	-201.25	-202.25
	1167.5	-41.25	-53.75	-56		934	-197	-200.75	-199.5
	1170	-42.25	-50.5	-49.75		936	-195.5	-200.25	-205.25
	1172.5	-38.5	-51.75	-50.75		938	-195.25	-204.25	-199
	1175	-41.75	-52	-51.75		940	-196.75	-198.5	-199.5
	1177.5	-44.25	-49	-52.25		942	-192.25	-199.75	-199.75
	1180	-40.25	-46.5	-57		944	-194	-202	-197.5
	1182.5	-44	-53.25	-54.25		946	-191.25	-197	-197
	1185	-44.25	-50	-55		948	-195.75	-200	-199.75
	1187.5	-42	-44.5	-50.25		950	-193.75	-196	-200.25
	1190	-35	-51.25	-49.25		952	-196.25	-194.5	-200
	1192.5	-39.5	-53.5	-50.75		954	-194.25	-195.5	-198.75
	1195	-44.5	-49.25	-52		956	-197.25	-198	-193.75
	1197.5	-48	-47.5	-55		958	-198	-195	-196.25
	1200	-45.75	-47	-53.5		960	-194.25	-190	-188.5
	1202.5	-42.5	-49	-52.25		962	-196	-195.25	-191.75
	1205	-41.25	-49	-53.5		964	-190.5	-188.75	-188
	1207.5	-41.75	-55	-50.75		966	-192.75	-189.75	-189.5
	1210	-42	-50.25	-50.75		968	-196	-188.75	-188
	1212.5	-45	-54.25	-54		970	-196	-187.5	-190.25
	1215	-45.25	-52.25	-53.25		972	-195.5	-193.5	-188.25
	1217.5	-43.75	-46.75	-55.25		974	-190.25	-190.25	-184.25
	1220	-39.75	-51	-51.25		976	-191.5	-188.75	-189.75
	1222.5	-43.25	-51	-52.5		978	-191.25	-186.25	-187
	1225	-42.75	-54.25	-53.75		980	-192	-189.25	-190.75
	1227.5	-43.25	-49.25	-57		982	-189	-189.5	-189.75
	1230	-42.75	-53.5	-55.75		984	-192.75	-191	-190.25
	1232.5	-45.75	-50.75	-52		986	-192.25	-188	-185.5
	1235	-45.5	-49.5	-56.5		988	-190.25	-185	-184
	1237.5	-39.5	-52.25	-54		990	-188.5	-186.5	-186
	1240	-39	-51.75	-50		992	-192	-187.25	-188.75
	1242.5	-39.5	-50.25	-53		994	-186.75	-188.25	-187
	1245	-47.5	-50.25	-51		996	-189.5	-182.5	-184
	1247.5	-43.5	-52.25	-52		998	-189	-186.75	-183.5
	1250	-44.25	-49.25	-53.25		1000	-190.5	-193.75	-184
	1252.5	-44	-47	-55.5		1002	-190.5	-189	-186.75
	1255	-42	-53.5	-50		1004	-188	-190	-184
	1257.5	-45.25	-53.5	-47		1006	-191.25	-190.25	-184.5
	1260	-46.75	-54.5	-54.25		1008	-191	-183.75	-187.75
	1262.5	-45.25	-52.25	-55		1010	-187.25	-189	-195.75
	1265	-47	-48.25	-55.5		1012	-187.5	-190	-185.25
	1267.5	-43.25	-47.25	-55.25		1014	-186.75	-184.25	-187
	1270	-43	-48.25	-50		1016	-187.25	-189.5	-187.25
	1272.5	-40.25	-52.25	-46.75		1018	-185.5	-187.25	-180.25
	1275	-40.75	-49.75	-53.5		1020	-192.5	-193.75	-186
	1277.5	-45.5	-48.25	-50.75		1022	-185.75	-190.5	-187.25
	1280	-42	-48.5	-49.5		1024	-189.5	-191.25	-184.75
	1282.5	-42	-50.5	-51		1026	-191.75	-183.5	-184.75
	1285	-42.25	-48.75	-53.25		1028	-193.25	-191.25	-186.5
	1287.5	-44.5	-53.25	-49		1030	-187.75	-187.25	-181.75
	1290	-38.25	-53	-49		1032	-191.75	-189.25	-184.75
	1292.5	-43.5	-54	-54.5		1034	-188.25	-191	-186.25
	1295	-40.5	-49	-51		1036	-184	-186	-186.25
	1297.5	-44.75	-48.75	-56		1038	-192	-187.75	-184.25
	1300	-37	-45	-50.5		1040	-185.75	-189.25	-183.75
	1302.5	-39.75	-50.5	-54.75		1042	-191.75	-191.5	-183
	1305	-44.5	-52.25	-48.75		1044	-194.25	-187.25	-188.5
	1307.5	-42.75	-47.5	-49.5		1046	-192	-184.5	-182.5
	1310	-39	-50.5	-54.25		1048	-195.25	-186.5	-188.25
	1312.5	-43	-52	-55.5		1050	-190.75	-189	-185.5
	1315	-43	-50.25	-49.5		1052	-189.75	-192.5	-183
	1317.5	-43	-51	-60.25		1054	-191.25	-189.75	-187
	1320	-41	-49.5	-51.25		1056	-192.75	-188.5	-189.25
	1322.5	-43.5	-54.5	-50.75		1058	-190.25	-190.5	-186.5
	1325	-41	-53.75	-51		1060	-188.5	-189.5	-191.75
	1327.5	-43	-54	-48.75		1062	-189.75	-185.75	-183.25
	1330	-42	-49.75	-49.75		1064	-191	-187.75	-187.25
	1332.5	-41.75	-47.5	-52.25		1066	-188.75	-193.25	-184.25
	1335	-42.25	-47	-49.25		1068	-191.5	-192	-187.75
	1337.5	-40	-49	-53.75		1070	-188	-187	-184.75
	1340	-38.5	-53.75	-47.25		1072	-192.75	-190.25	-187.75
	1342.5	-40.75	-52	-53.5		1074	-188	-184.5	-186.75
	1345	-45.5	-50.25	-50.5		1076	-191.75	-188.5	-187.5
	1347.5	-48.5	-47	-52		1078	-192.25	-190.5	-188.75
	1350	-41.25	-44.75	-48.5		1080	-189.75	-191.75	-185.75
	1352.5	-47	-52	-48.25		1082	-192	-188.5	-184.5
	1355	-39.5	-54.5	-52.25		1084	-191.5	-195.5	-187.25
	1357.5	-42.5	-55.75	-54		1086	-193.5	-188	-187.5
	1360	-43.75	-49.75	-51.25		1088	-191.5	-189	-187
	1362.5	-43.75	-54	-64.25		1090	-189.25	-192.25	-189.5
	1365	-44.25	-53.25	-63		1092	-189.75	-190.5	-182.5
	1367.5	-41	-53	-65.25		1094	-193.5	-186	-190.75
	1370	-44	-55	-68.75		1096	-195.5	-190	-186
	1372.5	-38.25	-53	-66.75		1098	-190.75	-190.75	-187
	1375	-41	-57	-67		1100	-188.5	-189.5	-187.25
	1377.5	-47.25	-56	-65.25		1102	-193	-185.5	-184.5
	1380	-41.5	-54	-64.25		1104	-191	-188	-189.25
	1382.5	-42.75	-61	-64.25		1106	-192.5	-191	-184.5
	1385	-44.5	-61.75	-70.5		1108	-194	-193.25	-187.5
	1387.5	-48.5	-62.25	-69		1110	-191.5	-188.5	-184.5
	1390	-47.75	-63.75	-72.75		1112	-193	-190.5	-188.25
	1392.5	-47.25	-64	-84.25		1114	-192	-184.75	-188.25
	1395	-56.5	-67.25	-88.25		1116	-192	-191.5	-188
	1397.5	-59	-66.5	-105.5		1118	-189.5	-190	-188.25
	1400	-59.5	-66.5	-120.75		1120	-189.75	-189.75	-188.25
	1402.5	-51.75	-68	-136		1122	-188.5	-188.5	-186.25
	1405	-49.5	-73.25	-153.5		1124	-190.5	-189.75	-181.75
	1407.5	-54.25	-76.5	-169.25		1126	-193.25	-187.75	-193
	1410	-55.75	-75.25	-173.25		1128	-188.75	-192.75	-186.25
	1412.5	-51	-81.25	-185		1130	-186.25	-191.5	-187.75
	1415	-55	-84.75	-187		1132	-191	-190.25	-186.25
	1417.5	-49.25	-89.75	-192.5		1134	-192	-190.25	-182.75
	1420	-51.25	-97.75	-191.25		1136	-193	-188.25	-185.5
	1422.5	-49.75	-108.75	-189.75		1138	-189.25	-189.25	-185.25
	1425	-46.25	-114.75	-185.5		1140	-191.5	-190.5	-186
	1427.5	-52.5	-120.5	-194.5		1142	-191.25	-187.75	-182.75
	1430	-55.25	-115.75	-197.25		1144	-195	-190.25	-188.75
	1432.5	-55.5	-118.75	-191.25		1146	-192.5	-192.5	-187.5
	1435	-51.5	-121.25	-194.5		1148	-191	-185.25	-189.25
	1437.5	-49	-122.75	-192.25		1150	-193	-191	-188.5
	1440	-49.25	-123.25	-193		1152	-191	-187.25	-183.5
	1442.5	-51.75	-126.25	-193.75		1154	-194	-194.75	-183.5
	1445	-51.75	-123	-192		1156	-194.25	-193.5	-189.5
	1447.5	-52	-120.5	-197.75		1158	-196.75	-193.25	-187.5
	1450	-51	-116.75	-194		1160	-196.25	-187.5	-186
	1452.5	-46.75	-115.5	-191.5		1162	-195.25	-187	-187.25
	1455	-42	-114	-194.75		1164	-195	-190.75	-185.5
	1457.5	-46.25	-111.25	-192.5		1166	-189	-190.5	-189.25
	1460	-45.25	-108.25	-193.5		1168	-195.75	-188.25	-186.5
	1462.5	-44.5	-104.25	-194		1170	-188.5	-191.5	-188
	1465	-46.75	-102.25	-196.5		1172	-189.5	-190.5	-188
	1467.5	-44.25	-97.5	-194.75		1174	-193.25	-188.5	-187.25
	1470	-43.25	-96.75	-190.5		1176	-192.25	-185.25	-188.75
	1472.5	-40.5	-93.25	-190.25		1178	-189	-187	-188
	1475	-45.75	-94	-193.25		1180	-195.25	-188	-190
	1477.5	-52.75	-91	-194.75		1182	-192.5	-190.5	-185.25
	1480	-63.25	-90.5	-196.75		1184	-192	-193.25	-190.5
	1482.5	-69.5	-86.75	-197.25		1186	-192	-189	-190.25
	1485	-73.25	-89	-199.5		1188	-192.5	-188.75	-190
	1487.5	-73	-81.5	-194.75		1190	-195	-189.25	-180.75
	1490	-73	-85.5	-195		1192	-198.25	-191.75	-189.5
	1492.5	-71.25	-86	-190.75		1194	-195.75	-188.25	-187.75
	1495	-70.25	-78.25	-193		1196	-193.75	-186	-181.5
	1497.5	-69.75	-84.5	-194.5		1198	-189.25	-189	-192.75
	1500	-57.75	-77.5	-195.75		1200	-191.75	-187.25	-184.5
	1502.5	-57	-76.25	-195.5		1202	-200.75	-188.25	-182
	1505	-56	-81.25	-187		1204	-185.75	-190.5	-189.5
	1507.5	-48.75	-76.5	-193.75		1206	-193.25	-188.75	-184
	1510	-50.5	-80.5	-194.75		1208	-193.5	-189.75	-191
	1512.5	-45.25	-79	-196.75		1210	-190	-189	-190.5
	1515	-52.5	-74	-200.25		1212	-191.25	-186	-193.75
	1517.5	-50.25	-73	-190		1214	-190	-191	-194.75
	1520	-44.5	-75	-194		1216	-191.25	-191.5	-191.5
	1522.5	-47.5	-77.75	-190.5		1218	-195.5	-192.25	-191.75
	1525	-44.75	-79.5	-192.5		1220	-192	-189.75	-192.5
	1527.5	-46	-74.25	-192		1222	-192.75	-197.5	-196.5
	1530	-43	-72.25	-196		1224	-189.75	-190.5	-195.75
	1532.5	-44.5	-70.5	-199.25		1226	-195.75	-191.5	-188.75
	1535	-47.75	-67.5	-194		1228	-193.5	-195	-195
	1537.5	-43.75	-69.5	-196.75		1230	-192.5	-196.25	-193.25
	1540	-41.5	-71.5	-190.75		1232	-191.75	-196	-190.75
	1542.5	-43.5	-67.75	-193.25		1234	-196.75	-199.5	-191
	1545	-42.5	-67.25	-197.75		1236	-194.25	-197.25	-192.75
	1547.5	-46	-68.75	-199.25		1238	-190.25	-195.75	-189.75
	1550	-46.25	-61.75	-198.25		1240	-197.75	-193.75	-189
	1552.5	-42.75	-63.75	-196.5		1242	-192.5	-196.25	-186.25
	1555	-45	-62.5	-192.25		1244	-194.5	-190.75	-191
	1557.5	-44.5	-59.5	-191.25		1246	-200.5	-187.75	-190
	1560	-49	-61	-193.25		1248	-196.25	-192	-186.25
	1562.5	-44.75	-57.5	-195.5		1250	-197.5	-195	-185
	1565	-47.75	-58.25	-194.5		1252	-193	-192	-186
	1567.5	-46.75	-55	-193.75		1254	-192.5	-194	-186
	1570	-48.25	-63.75	-196.5		1256	-196	-195.5	-185.25
	1572.5	-50.25	-58.75	-189.25		1258	-194.75	-190	-186.25
	1575	-46.25	-62.75	-197.25		1260	-199.25	-191.75	-188
	1577.5	-50.75	-57.75	-197.25		1262	-187.75	-188	-189.75
	1580	-47	-54	-196		1264	-192.25	-191.5	-187.75
	1582.5	-49.5	-56.25	-199.75		1266	-192.25	-185.25	-194.5
	1585	-48	-54	-194.25		1268	-195.75	-193	-194.25
	1587.5	-42.25	-55.5	-194.5		1270	-189.75	-189.25	-191.25
	1590	-43.75	-53.25	-193.25		1272	-191.25	-190.5	-192
	1592.5	-48.25	-61	-193.5		1274	-196.5	-188.25	-198.25
	1595	-47	-55	-192.5		1276	-195	-188.75	-199.5
	1597.5	-52.25	-57.75	-199.5		1278	-195.75	-188.75	-201.75
	1600	-49.25	-50.25	-196		1280	-194.5	-186.75	-209.25
	1602.5	-46.5	-52.25	-193		1282	-191	-194.75	-207
	1605	-43	-56.75	-194.25		1284	-187.25	-192.5	-214.75
	1607.5	-47.25	-55.25	-190.75		1286	-192	-187.75	-212
	1610	-47.25	-57.75	-195		1288	-196	-190.25	-212.5
	1612.5	-50	-53.5	-198.25		1290	-195.75	-186.5	-211.5
	1615	-52.75	-48.75	-197		1292	-194.75	-188.75	-219
	1617.5	-49	-51.5	-194.25		1294	-195	-188.5	-215.75
	1620	-45	-49.5	-188.75		1296	-196	-188.5	-216.5
	1622.5	-47	-51.25	-195.75		1298	-190.5	-188.25	-218
	1625	-47	-53.5	-196		1300	-194.25	-189.25	-216.5
	1627.5	-52.75	-52.25	-194.5		1302	-192.25	-189.75	-218.25
	1630	-48	-52.75	-193.5		1304	-194.5	-186.5	-213.75
	1632.5	-48.25	-52.25	-193.5		1306	-193	-185.25	-215
	1635	-52	-49.75	-198.5		1308	-191.25	-188	-210.5
	1637.5	-49.75	-56.75	-195.75		1310	-194.75	-190.25	-218.5
	1640	-45.75	-48.75	-193		1312	-196	-187	-217.75
	1642.5	-51.25	-54.75	-195.25		1314	-197.5	-189.5	-212.25
	1645	-52.5	-49.75	-198.5		1316	-192	-189.5	-212.5
	1647.5	-50.75	-54.25	-200.75		1318	-192	-184.75	-214.25
	1650	-50.5	-49.5	-197.5		1320	-191.5	-187.75	-213.25
	1652.5	-50.75	-52	-193.25		1322	-194.5	-187.25	-212
	1655	-50.25	-50.75	-194.75		1324	-193.75	-192	-213
	1657.5	-46.5	-47.25	-194.5		1326	-195.5	-187.5	-212.75
	1660	-48.25	-55.75	-193.5		1328	-193.5	-192.75	-210.5
	1662.5	-50	-52.25	-195.25		1330	-193.75	-193	-215.75
	1665	-48.5	-47	-195.25		1332	-196	-193.25	-213.75
	1667.5	-50.5	-51.5	-193.5		1334	-195	-195.75	-207
	1670	-51.5	-51.25	-189.75		1336	-198.75	-200.25	-208
	1672.5	-49	-54	-189.5		1338	-194.75	-194.75	-208.75
	1675	-47.5	-52.25	-193.75		1340	-203	-198.25	-212.75
	1677.5	-48.75	-53	-193.5		1342	-197.5	-195.5	-207.5
	1680	-50.25	-52	-192		1344	-197.75	-197.75	-213.75
	1682.5	-44.75	-51	-196.25		1346	-192.5	-201.25	-210.25
	1685	-46.75	-58.75	-197		1348	-195.75	-205.25	-213
	1687.5	-48.75	-54.75	-193.75		1350	-200	-202.75	-205
	1690	-41.75	-55	-193.5		1352	-198.5	-202.5	-207.5
	1692.5	-49.75	-54.75	-194		1354	-199.5	-211.25	-211.5
	1695	-47	-55	-197		1356	-202.75	-208.5	-208.25
	1697.5	-49.5	-57	-201.75		1358	-205.75	-205.25	-208.75
	1700	-44.5	-49.5	-192		1360	-203	-205.25	-210.25
	1702.5	-45.25	-50.75	-193.5		1362	-204.5	-211	-205.5
	1705	-46.5	-55.25	-191.5		1364	-208	-203.5	-209
	1707.5	-47.25	-56.25	-194.25		1366	-215	-207.25	-209.5
	1710	-46.75	-54.25	-194.25		1368	-215	-207.5	-203.25
	1712.5	-50.75	-53	-196.5		1370	-221.5	-216.75	-208.75
	1715	-51.5	-56.75	-193.25		1372	-219.5	-212.25	-208
	1717.5	-49.5	-54	-194.5		1374	-217	-213	-204.75
	1720	-49.5	-55.25	-193		1376	-220.75	-206.5	-206.25
	1722.5	-47	-59.75	-191.75		1378	-225.75	-210.25	-210
	1725	-49.75	-61	-195.5		1380	-229.25	-210.25	-207.5
	1727.5	-53	-61.5	-197.75		1382	-227.5	-211.5	-205.25
	1730	-48.75	-58	-195.25		1384	-228.75	-209	-207.75
	1732.5	-50.5	-59	-197.25		1386	-228.75	-208	-201.25
	1735	-48.75	-58	-200.75		1388	-231	-207.25	-202.75
	1737.5	-46.25	-63.75	-197		1390	-235.75	-202	-202.75
	1740	-47	-62.25	-191.25		1392	-231.25	-204	-205
	1742.5	-51.5	-59.25	-197		1394	-231.5	-206.5	-207
	1745	-49	-63.25	-195		1396	-226	-202	-201
	1747.5	-51	-60.75	-194		1398	-232.5	-202.5	-199.75
	1750	-49.25	-60.75	-197.75		1400	-230.75	-207.5	-201.75
	1752.5	-47	-62.75	-199.75		1402	-233.25	-203.75	-203.25
	1755	-50	-61.5	-189.25		1404	-231	-205	-208.75
	1757.5	-49.5	-63	-193.25		1406	-229.25	-205.5	-201.25
	1760	-47	-67.75	-198.75		1408	-229.25	-201.75	-205.25
	1762.5	-47.75	-64.75	-195.25		1410	-228.25	-206.75	-211
	1765	-44.25	-65.25	-197.25		1412	-227.25	-197.25	-205.5
	1767.5	-43.25	-62.75	-197.25		1414	-228.25	-203	-201.5
	1770	-51.75	-67.5	-190.75		1416	-231	-204.5	-202.5
	1772.5	-46.75	-69.75	-194		1418	-231.75	-202.5	-203
	1775	-46	-71	-197		1420	-226	-203.5	-202.5
	1777.5	-50.5	-70.75	-197		1422	-230.75	-205.25	-203.75
	1780	-50.75	-70.75	-195.5		1424	-232.75	-203.75	-206
	1782.5	-47.25	-69.75	-195.5		1426	-231.75	-202.5	-201.25
	1785	-49.75	-68	-193		1428	-231.75	-207	-204
	1787.5	-49.75	-71.75	-194		1430	-228	-198	-204.5
	1790	-45	-69.25	-199.75		1432	-227.75	-204	-197.5
	1792.5	-49.25	-72.75	-197		1434	-236	-205	-200.5
	1795	-51.5	-71.5	-194		1436	-232	-204	-199
	1797.5	-47.25	-70.5	-197.5		1438	-233.5	-202.25	-202.75
	1800	-48.25	-70.75	-192		1440	-228.25	-203.5	-200
	1802.5	-49.75	-72.75	-194		1442	-230.75	-206.5	-201.25
	1805	-50.5	-71	-196.5		1444	-228.75	-201.75	-202
	1807.5	-47.25	-77.75	-198.25		1446	-231.25	-206	-201
	1810	-48.25	-79.5	-196.75		1448	-229.75	-207.75	-196.5
	1812.5	-51.25	-79	-197.75		1450	-227.25	-204.75	-199.75
	1815	-53.75	-72.25	-194.75		1452	-231.25	-209.25	-199.25
	1817.5	-50.25	-78.75	-195		1454	-230.75	-204.75	-204
	1820	-49.25	-79	-195.75		1456	-231.25	-207	-202.25
	1822.5	-49.5	-78	-195.25		1458	-227.5	-206.75	-199.5
	1825	-52.5	-82.25	-193.75		1460	-231.25	-203.75	-202
	1827.5	-48.5	-78.5	-197.25		1462	-228	-207.25	-195
	1830	-53.75	-80.75	-194.5		1464	-231.75	-205.25	-203.5
	1832.5	-47.25	-80.75	-195		1466	-231.25	-205.75	-200.5
	1835	-50.25	-74.25	-193.75		1468	-234	-206.25	-193.25
	1837.5	-50	-84	-193.75		1470	-233	-210.25	-197.75
	1840	-47.75	-82.25	-193.75		1472	-227.75	-199.75	-202
	1842.5	-52.25	-87.25	-192		1474	-234.5	-203.25	-206.25
	1845	-49	-80.5	-196.5		1476	-231.25	-205.25	-196.25
	1847.5	-53.25	-84.5	-196		1478	-227.25	-209.25	-204.25
	1850	-53.75	-81.5	-197.75		1480	-231.75	-205	-197.25
	1852.5	-52.25	-87	-193.75		1482	-232.75	-206.5	-199.5
	1855	-48	-83	-194.25		1484	-226	-205.75	-200
	1857.5	-50.25	-83.25	-191.5		1486	-231.5	-202.5	-197.5
	1860	-47.25	-86.75	-195.25		1488	-226.75	-201.75	-203.75
	1862.5	-51.75	-85	-195		1490	-229	-204.5	-204
	1865	-54.5	-85	-199.25		1492	-235.5	-201	-201.75
	1867.5	-51.5	-84	-190.75		1494	-225.5	-204.25	-200.5
	1870	-50.25	-83.5	-193.75		1496	-231	-202.5	-190.5
	1872.5	-48.25	-89.75	-196.5		1498	-229.5	-198	-199.25
	1875	-52	-88.75	-197.75		1500	-229.5	-206.5	-201.25
	1877.5	-48	-82.75	-195.25		1502	-232.5	-202.5	-200.75
	1880	-48	-88.5	-192.5		1504	-228.75	-209.5	-199.5
	1882.5	-50.5	-88.5	-199		1506	-228	-202.5	-199
	1885	-54	-87.25	-195.5		1508	-228	-201.5	-202.25
	1887.5	-50	-90.25	-194.75		1510	-231	-208.5	-201.5
	1890	-50.75	-93.5	-195.5		1512	-232.75	-207	-201
	1892.5	-50.25	-91	-191.5		1514	-228.75	-201.75	-200.75
	1895	-54.5	-89.75	-189.25		1516	-230.5	-202.25	-198.5
	1897.5	-54.25	-90.25	-198.5		1518	-232.25	-205	-198.5
	1900	-48.5	-87.25	-197.75		1520	-232	-205	-199.75
	1902.5	-50.5	-93	-193.75		1522	-230	-205	-201
	1905	-43.75	-92	-194.5		1524	-228	-208.25	-198.75
	1907.5	-46.75	-91	-193.5		1526	-234.75	-206	-195
	1910	-47	-92.25	-196.5		1528	-232.5	-199.25	-200
	1912.5	-50.5	-93.5	-192.75		1530	-231	-206	-201.75
	1915	-47.75	-88.25	-198.75		1532	-228	-205.5	-197
	1917.5	-48.5	-94	-196.25		1534	-228	-208	-200.75
	1920	-50.75	-95.75	-193.75		1536	-228.25	-204	-195.5
	1922.5	-48.25	-92	-188.75		1538	-228.5	-207.75	-198
	1925	-48.25	-100.5	-194.5		1540	-228	-207	-193.5
	1927.5	-48.5	-98.75	-192.75		1542	-231.75	-205.5	-202.5
	1930	-49	-95.25	-197.75		1544	-231.75	-205.5	-203.5
	1932.5	-50.75	-93.75	-194		1546	-230	-205	-206.5
	1935	-51	-94.5	-197.75		1548	-231.75	-206	-200.5
	1937.5	-49.25	-97.25	-195.25		1550	-232.75	-209.75	-199
	1940	-46.75	-98.25	-192		1552	-230.75	-202.75	-197.75
	1942.5	-50.25	-96	-192.75		1554	-231	-206.5	-199.5
	1945	-49	-97	-197		1556	-230.75	-207.5	-200
	1947.5	-55.75	-99	-191.25		1558	-230	-212.5	-200.75
	1950	-51.75	-90.25	-192.25		1560	-227.75	-209.25	-201.5
	1952.5	-43.75	-98.75	-192.5		1562	-232.25	-206.75	-201
	1955	-47.5	-96.5	-196.75		1564	-232	-209	-198.75
	1957.5	-50.25	-98.25	-188.25		1566	-233.25	-207.25	-201.25
	1960	-53	-97	-195		1568	-233.25	-211	-198.5
	1962.5	-54.25	-97.25	-191.25		1570	-231.25	-212.25	-202.5
	1965	-55.25	-97.5	-198		1572	-233.5	-208.5	-195.5
	1967.5	-49	-94	-194.25		1574	-231.5	-209	-202.5
	1970	-46.25	-92.5	-195.25		1576	-232.25	-206.25	-199
	1972.5	-48.75	-99	-193.5		1578	-228.25	-212	-193.25
	1975	-48.5	-103	-194.5		1580	-232.25	-206.25	-205
	1977.5	-48.75	-98.75	-191.75		1582	-231.25	-212.75	-203.25
	1980	-49.75	-97.25	-195.25		1584	-229.75	-213	-194.5
	1982.5	-48.75	-95.5	-195.5		1586	-229.5	-211.5	-197.25
	1985	-50.25	-97	-194.5		1588	-230.75	-217.5	-204
	1987.5	-48.75	-98	-199.5		1590	-229.25	-210.25	-196
	1990	-49.75	-101.5	-193.25		1592	-231	-212.5	-195.25
	1992.5	-48.75	-101.25	-192.75		1594	-228.25	-207.75	-195.5
	1995	-50.5	-102.25	-198.25		1596	-230	-214.25	-199
	1997.5	-52.5	-97.75	-193		1598	-231.75	-215.25	-198.5
	2000	-50.75	-97.75	-195.75		1600	-233.5	-209.75	-198.25
	2002.5	-49	-103.5	-196		1602	-235	-211	-199.25
	2005	-46.75	-105	-195.5		1604	-234.5	-209.5	-200.5
	2007.5	-46.5	-101.75	-189.5		1606	-234.5	-218.25	-197.25
	2010	-50.75	-97.25	-194.75		1608	-230	-214.25	-201
	2012.5	-52.5	-100	-191		1610	-231.75	-216.5	-198.75
	2015	-53.25	-95.25	-201		1612	-226.5	-213.75	-200.5
	2017.5	-53.25	-99.5	-194		1614	-235.25	-219	-196.75
	2020	-50	-103.5	-196.75		1616	-234	-217.5	-200
	2022.5	-44.75	-101.5	-195.25		1618	-233.5	-217.5	-197.25
	2025	-47.75	-107.5	-194		1620	-233	-218.25	-201.5
	2027.5	-52.25	-103.5	-196		1622	-235	-215.25	-203.25
	2030	-48	-101.5	-197		1624	-235	-216.25	-198.75
	2032.5	-53.25	-99.75	-198.25		1626	-227.75	-216.25	-200.25
	2035	-51.75	-99.25	-193.75		1628	-228.5	-218.5	-194.75
	2037.5	-50	-102.75	-195.5		1630	-230.5	-213.75	-203.5
	2040	-53.25	-98.75	-193.5		1632	-232.5	-216.5	-198
	2042.5	-49.5	-105	-194		1634	-229.5	-211.5	-201
	2045	-48	-100.5	-193.75		1636	-229	-214	-191.75
	2047.5	-55.75	-99.5	-193.25		1638	-229.75	-216.75	-196.75
	2050	-49.5	-104.75	-194		1640	-229.25	-215.25	-201.25
	2052.5	-49.5	-103.5	-195		1642	-230	-215	-195.5
	2055	-50	-102.25	-190.5		1644	-233.5	-211.25	-198.25
	2057.5	-52.5	-109	-191.5		1646	-232.5	-217.25	-201.5
	2060	-51	-108.5	-194.25		1648	-234	-220	-196.5
	2062.5	-46.75	-99.75	-193		1650	-231.5	-219	-199
	2065	-50.75	-103.5	-197.75		1652	-230.5	-215	-202.5
	2067.5	-51.5	-106	-194.25		1654	-235	-215.75	-195.5
	2070	-50.25	-108	-188.5		1656	-233.5	-219.25	-203.5
	2072.5	-46.75	-109.5	-193.75		1658	-233.25	-218.5	-205.75
	2075	-47.5	-108.75	-198.5		1660	-234.25	-213.75	-196.5
	2077.5	-52.25	-107	-196		1662	-229.75	-213.25	-201.75
	2080	-52.25	-104	-194.5		1664	-232.25	-214.75	-196
	2082.5	-54.25	-105	-195.25		1666	-232	-212.5	-199.25
	2085	-51.25	-106.75	-195.75		1668	-234.25	-215.25	-205.75
	2087.5	-46.5	-105.75	-197		1670	-232	-217.25	-203
	2090	-46.75	-104	-194		1672	-232	-215.5	-196.75
	2092.5	-49	-107	-197.5		1674	-230.5	-217.25	-201.25
	2095	-53.75	-106.75	-198.75		1676	-232.25	-214.25	-198.75
	2097.5	-52.5	-104.25	-195.5		1678	-228.5	-213.25	-195.25
	2100	-52.25	-101.75	-197.75		1680	-230.75	-217	-195.5
	2102.5	-46.75	-105.75	-192		1682	-226.75	-222	-204.25
	2105	-52.5	-108.75	-192.75		1684	-236.5	-214	-201
	2107.5	-50.25	-107.5	-191.75		1686	-235.25	-213.5	-192.75
	2110	-48.25	-106.5	-194		1688	-227.75	-221	-199
	2112.5	-50.5	-104.25	-197.25		1690	-233.25	-214.25	-197.75
	2115	-54.5	-106.75	-196.5		1692	-230	-217.75	-201.75
	2117.5	-50.25	-107.75	-195.75		1694	-230.25	-215.5	-197.25
	2120	-49	-106.75	-196.5		1696	-232.75	-216.75	-202.25
	2122.5	-46	-107.5	-198		1698	-232.5	-213.75	-202.5
	2125	-49	-113	-199		1700	-235.75	-214	-202.75
	2127.5	-50.25	-106.25	-197.5		1702	-239	-214.5	-202.25
	2130	-47	-106.75	-194		1704	-232.25	-214	-202
	2132.5	-51.5	-103.25	-197.75		1706	-234	-219.25	-196.25
	2135	-50.25	-105.5	-199.5		1708	-230	-215.75	-200
	2137.5	-53.75	-109	-192.75		1710	-235.5	-216.5	-200
	2140	-49.25	-108.75	-193.25		1712	-231.75	-217.5	-201.25
	2142.5	-50.75	-109	-194		1714	-228	-213	-201.25
	2145	-47.25	-113.25	-197.25		1716	-236.5	-221.5	-200.5
	2147.5	-54.5	-108.75	-196.5		1718	-232	-215.75	-199
	2150	-51	-106.75	-198.75		1720	-237	-219	-196
	2152.5	-50.5	-108	-196.5		1722	-227.75	-216	-202.75
	2155	-51	-107.25	-192.25		1724	-229.75	-216.5	-201
	2157.5	-48.75	-107.5	-192.75		1726	-231	-217	-196.5
	2160	-50.5	-108.75	-195.75		1728	-230.25	-215	-200.25
	2162.5	-51.25	-102.75	-193.5		1730	-232	-214	-205.75
	2165	-48	-107	-197.75		1732	-234.5	-215.25	-199.75
	2167.5	-46.25	-105.5	-196.5		1734	-229.5	-216.75	-197
	2170	-50.5	-108	-198.25		1736	-232.5	-213.25	-197.5
	2172.5	-46.5	-110.75	-191.25		1738	-234.25	-213.75	-195.5
	2175	-47.25	-108.25	-196.5		1740	-233.25	-219.25	-201.75
	2177.5	-52.75	-105.75	-197.75		1742	-227	-216	-200.5
	2180	-49.25	-104	-195.25		1744	-234	-221.25	-201
	2182.5	-51.25	-110.5	-197		1746	-233.25	-216.75	-199.25
	2185	-52.5	-109.75	-193.75		1748	-227.25	-212.5	-199.25
	2187.5	-52	-109.5	-193.75		1750	-230	-219.25	-194.25
	2190	-47.5	-112.75	-197.25		1752	-228.25	-214	-199.5
	2192.5	-49.75	-112	-199.25		1754	-232	-215.25	-199
	2195	-55.5	-108	-196.5		1756	-235	-213	-200.25
	2197.5	-48.75	-106.5	-197.5		1758	-229	-216.5	-199
	2200	-51.75	-108.75	-195.75		1760	-232.5	-221.75	-198.5
	2202.5	-50.25	-106	-198.5		1762	-230.25	-216	-199.75
	2205	-47	-109.75	-192		1764	-230.75	-218	-199.25
	2207.5	-46	-114	-193.25		1766	-228.25	-210.75	-200
	2210	-50	-110.5	-194.75		1768	-228.5	-213.5	-198.75
	2212.5	-50	-113	-195.25		1770	-233.25	-215.5	-202.5
	2215	-47	-108.25	-197.75		1772	-229.5	-211.25	-201.75
	2217.5	-48	-108.75	-193.25		1774	-230.25	-214.25	-199
	2220	-48.75	-106.25	-194.5		1776	-227.75	-211.5	-202.25
	2222.5	-44.75	-114.25	-192.25		1778	-230.25	-217.75	-201.75
	2225	-45.75	-115	-191.75		1780	-227.25	-220	-199.75
	2227.5	-45.5	-112	-193.5		1782	-234.5	-213.25	-198.5
	2230	-51.25	-107.25	-198.75		1784	-228	-220.25	-201.75
	2232.5	-52.5	-109	-194.25		1786	-231.25	-213.25	-202.75
	2235	-49	-108	-194		1788	-233.25	-213.25	-200.5
	2237.5	-45.5	-110.75	-199.75		1790	-232.5	-213.5	-195
	2240	-45.25	-106.25	-192.75		1792	-225	-212.75	-201.5
	2242.5	-44.75	-113.25	-193.75		1794	-232.75	-216.5	-198.25
	2245	-51.25	-107.75	-195.75		1796	-233.75	-215.5	-200.25
	2247.5	-54.25	-113.25	-197.25		1798	-231.25	-218	-195
	2250	-53.75	-108	-198.25		1800	-229	-214.25	-199
	2252.5	-50.75	-108.5	-196		1802	-235.75	-215	-200
	2255	-46.5	-111	-190.25		1804	-233	-210.5	-196
	2257.5	-48.25	-112	-191.25		1806	-230	-214.5	-200
	2260	-46.75	-115.5	-196.25		1808	-235.75	-213.25	-197
	2262.5	-51	-111.5	-195.25		1810	-234.25	-210	-199.75
	2265	-52.25	-109.25	-200.5		1812	-232.5	-210.5	-198.25
	2267.5	-50.25	-110.5	-193.25		1814	-234.5	-214.75	-203.25
	2270	-49.75	-111.25	-194.5		1816	-231	-210.5	-200
	2272.5	-47	-113.5	-193.75		1818	-233.75	-216	-197.5
	2275	-47.25	-113.25	-194.75		1820	-232.5	-211.75	-195.25
	2277.5	-53.75	-110.75	-194.5		1822	-234.5	-212.75	-204
	2280	-49.75	-105.75	-197.75		1824	-230.5	-211.5	-198.75
	2282.5	-52.25	-108.5	-193.75		1826	-231.75	-211.25	-199.25
	2285	-50.75	-109.75	-197.5		1828	-232.5	-208	-201.25
	2287.5	-46.5	-107.25	-195		1830	-228.25	-211	-200
	2290	-50.25	-106.75	-189.5		1832	-230.5	-209.25	-199.25
	2292.5	-48.5	-110	-198		1834	-237.25	-210.25	-197.5
	2295	-52	-109.5	-190		1836	-231.75	-210	-201
	2297.5	-51.75	-108.25	-197		1838	-229.75	-211.75	-198
	2300	-49.25	-111	-192		1840	-235.75	-216	-202.5
	2302.5	-48.25	-109.75	-195.25		1842	-229	-210	-198.25
	2305	-47	-112	-198.5		1844	-234	-212.5	-197.75
	2307.5	-48	-109	-187.75		1846	-231	-214	-197.75
	2310	-47	-111.75	-194		1848	-233	-210.25	-199
	2312.5	-54.75	-111.25	-197		1850	-229	-211.75	-202.75
	2315	-49.25	-108.75	-192.75		1852	-231.75	-212.75	-199
	2317.5	-50	-108	-195		1854	-232.5	-218.75	-198
	2320	-51	-110.75	-191.5		1856	-237.75	-212.5	-199.5
	2322.5	-43.75	-113.25	-190.5		1858	-233.75	-212.25	-203
	2325	-46	-120	-197.25		1860	-234	-212.75	-201.25
	2327.5	-49.75	-115	-192.5		1862	-234.25	-209.5	-204.75
	2330	-50.5	-110.5	-191.25		1864	-235.5	-212.25	-202
	2332.5	-53.25	-112	-196.25		1866	-232.5	-215.5	-201
	2335	-46.75	-111.25	-194.5		1868	-229.75	-212	-197
	2337.5	-50.25	-115	-196		1870	-233.5	-215.5	-203.75
	2340	-53	-109.75	-189.25		1872	-229.5	-213	-199.25
	2342.5	-51.5	-113	-195		1874	-230.75	-212.75	-202
	2345	-50.75	-111	-196.5		1876	-230	-215	-200.75
	2347.5	-54	-114	-199.5		1878	-235.25	-214.75	-200.75
	2350	-49.75	-111.25	-193.75		1880	-235.5	-211.5	-201.5
	2352.5	-46.25	-108.75	-191		1882	-230.5	-210.25	-200
	2355	-49.25	-115.25	-193		1884	-233.5	-213.25	-201.5
	2357.5	-48.25	-113.5	-194.5		1886	-233.75	-211.75	-198.75
	2360	-50.25	-114.75	-193.25		1888	-234	-215.5	-201.25
	2362.5	-53.5	-114.75	-194.75		1890	-234.75	-210.5	-199.5
	2365	-50.5	-112.5	-196.25		1892	-231	-215.75	-197.5
	2367.5	-51.75	-114.5	-196		1894	-231	-212.5	-199.75
	2370	-51.5	-110.5	-190.25		1896	-231.75	-215.5	-203.5
	2372.5	-46.75	-114	-190.75		1898	-232.25	-212.25	-204
	2375	-49	-114.75	-195.25		1900	-232.25	-215.25	-203.25
	2377.5	-51	-114.75	-194		1902	-232.75	-211.5	-199
	2380	-51	-111.25	-196.25		1904	-231.75	-212	-197.25
	2382.5	-49	-112.75	-194		1906	-230	-213	-204.25
	2385	-48	-111	-192		1908	-234.25	-209.75	-199.5
	2387.5	-51	-109.75	-191.25		1910	-235.75	-216.25	-200.5
	2390	-43.75	-115.25	-195		1912	-230.75	-217	-197.75
	2392.5	-54.75	-111.25	-198.25		1914	-232.75	-213.5	-208.75
	2395	-49.75	-113.5	-192		1916	-228	-214.25	-195.5
	2397.5	-54.5	-114.75	-196		1918	-233.75	-212	-205.5
	2400	-49.75	-108.5	-196.75		1920	-232.5	-211.25	-197.75
	2402.5	-49.5	-112.25	-190.25		1922	-230.25	-215.75	-198
	2405	-48.5	-110.75	-195.5		1924	-235.75	-212.75	-198.5
	2407.5	-46.75	-111	-190		1926	-232	-214	-197.75
	2410	-48	-114.5	-192.25		1928	-228	-209.25	-199.5
	2412.5	-51	-114	-193		1930	-230.5	-210	-198.5
	2415	-51.75	-108.5	-197.75		1932	-227.25	-213.5	-202.25
	2417.5	-55	-113.5	-202.25		1934	-228.25	-215	-197
	2420	-50.25	-111.25	-195.5		1936	-230.75	-217.25	-199
	2422.5	-45.5	-119	-191.75		1938	-231.5	-212.5	-204.5
	2425	-50.25	-112.5	-193.5		1940	-233	-218.5	-202.75
	2427.5	-48	-110	-191		1942	-226.5	-209.25	-197.5
	2430	-51	-109.25	-198.75		1944	-233.25	-212	-201.5
	2432.5	-53	-112.75	-198.5		1946	-232.75	-217.75	-199.25
	2435	-51.25	-105.75	-193.75		1948	-231.5	-214	-199.5
	2437.5	-48.5	-111.75	-195.25		1950	-232.25	-211.75	-200
	2440	-51.75	-114.5	-194.25		1952	-235.5	-212.75	-199.5
	2442.5	-47.25	-112.5	-196.25		1954	-237	-219	-201.75
	2445	-50.75	-117.25	-195.25		1956	-233.75	-212	-201.25
	2447.5	-57.25	-109.75	-197.5		1958	-233.25	-211.75	-202.5
	2450	-50.25	-110.25	-203		1960	-229.25	-210	-199.25
	2452.5	-48.75	-115.5	-191		1962	-228.5	-212.5	-202
	2455	-46.5	-113.25	-190.75		1964	-232	-208.5	-204.25
	2457.5	-48.5	-113.25	-197.25		1966	-231	-211.25	-199.75
	2460	-49.75	-112.75	-195.25		1968	-230.25	-211.25	-199
	2462.5	-48.5	-112	-195		1970	-232.25	-209.5	-202
	2465	-50.75	-115	-191.75		1972	-234	-210.5	-201.5
	2467.5	-50.5	-107.75	-196.75		1974	-235.25	-209.75	-194.5
	2470	-44.75	-116.75	-193.75		1976	-227.5	-210.25	-197.75
	2472.5	-44.25	-114.75	-190.5		1978	-231.25	-208.5	-199
	2475	-47.75	-114.25	-192		1980	-233	-210.25	-201.25
	2477.5	-51.5	-115.25	-196.75		1982	-233	-215.75	-199.5
	2480	-52	-109.75	-193.75		1984	-233	-212.5	-201.25
	2482.5	-45.75	-111.75	-198.75		1986	-234.75	-215.25	-200
	2485	-43.5	-113.5	-192.25		1988	-235	-214.5	-203.5
	2487.5	-47.75	-113.25	-196.25		1990	-232.25	-214.5	-201.25
	2490	-50.5	-111.25	-190		1992	-234	-211.5	-201
	2492.5	-47.5	-117.25	-198.25		1994	-229	-213	-201.25
	2495	-50	-116	-197.5		1996	-227	-215.75	-201
	2497.5	-56.5	-112.5	-199.5		1998	-227.75	-213.75	-198.25
	2500	-49.75	-119	-193.25		2000	-230.5	-215.5	-205.5
	2502.5	-46.5	-108.5	-195.75		2002	-235	-209.25	-198.75
	2505	-45.75	-108.5	-195.75		2004	-231.75	-215.5	-198.75
	2507.5	-46.5	-112.5	-189.25		2006	-227.5	-209.5	-197.5
	2510	-47.25	-114.5	-191.5		2008	-235.25	-214.5	-201
	2512.5	-53	-113	-193.5		2010	-231	-214.5	-200
	2515	-45.25	-111.75	-193.25		2012	-227	-213.5	-198.25
	2517.5	-48.75	-115.5	-194.75		2014	-230.25	-213.75	-197.25
	2520	-49.75	-114	-194		2016	-233.75	-212.25	-201.5
	2522.5	-47.75	-112.25	-187.25		2018	-229.5	-212.5	-198.75
	2525	-50.75	-118	-194		2020	-233.25	-213.25	-203
	2527.5	-49	-113.75	-194		2022	-229	-211.25	-197.25
	2530	-52.5	-111.75	-194.5		2024	-234.75	-210	-200
	2532.5	-50.5	-113	-191		2026	-228.5	-214.25	-195.5
	2535	-49.75	-112.75	-193		2028	-229.5	-214.5	-202.75
	2537.5	-50.5	-111.5	-193.5		2030	-234.75	-212.5	-196.25
	2540	-46.5	-117.25	-195.25		2032	-232.25	-208.5	-201.75
	2542.5	-51	-115.5	-192.25		2034	-232.25	-212.5	-198.25
	2545	-51.25	-113.5	-198.5		2036	-231	-217.25	-196.25
	2547.5	-51.5	-112	-201		2038	-236.75	-213.5	-199.5
	2550	-49.5	-114.25	-198		2040	-238.25	-211.25	-204.5
	2552.5	-48.5	-112	-198.5		2042	-233.5	-207.5	-202
	2555	-49.75	-113.25	-189.25		2044	-233.75	-211.5	-204.5
	2557.5	-45.25	-115.5	-192		2046	-232	-211	-200.75
	2560	-49.25	-117.25	-190		2048	-234	-213.25	-207
	2562.5	-51.25	-118.75	-196.25		2050	-230.25	-210	-199.75
	2565	-48.5	-115.5	-194.5		2052	-232.75	-211	-202.5
	2567.5	-49.25	-113.75	-192.5		2054	-231.5	-214.5	-201
	2570	-48.5	-107.5	-193.5		2056	-234	-211	-201
	2572.5	-50.5	-115	-196.5		2058	-235	-213.5	-205.25
	2575	-51	-114.5	-194.5		2060	-230.5	-215.5	-198.75
	2577.5	-48	-112	-189.25		2062	-236.5	-215.25	-207.25
	2580	-52.5	-111.75	-194.75		2064	-235.25	-212	-202.5
	2582.5	-49.5	-111.25	-199.25		2066	-235.5	-215.25	-198.75
	2585	-50.5	-114.5	-193.25		2068	-232.25	-212.5	-197
	2587.5	-47.75	-112	-194.5		2070	-233	-214.25	-203.75
	2590	-49.75	-113.25	-188		2072	-228.5	-210	-202.75
	2592.5	-50.75	-111.75	-193.5		2074	-235.25	-210.75	-200.75
	2595	-47.5	-114	-195.25		2076	-232.75	-208.5	-200.5
	2597.5	-50.75	-112	-197		2078	-234	-215.25	-201.5
	2600	-51.25	-110.75	-196		2080	-232.25	-216.25	-200.75
	2602.5	-46.75	-112.5	-197.5		2082	-232.75	-215	-202.75
	2605	-43.5	-117	-190.25		2084	-229.25	-212	-202.25
	2607.5	-49.5	-121.25	-196.25		2086	-234.25	-215.75	-201.5
	2610	-46.75	-120.5	-191.25		2088	-230	-214.5	-201.5
	2612.5	-51.25	-117.25	-196.25		2090	-228.25	-211.5	-204.5
	2615	-53	-111.75	-196.5		2092	-235	-216.25	-201
	2617.5	-49	-114.5	-195.75		2094	-230.25	-211.5	-205.25
	2620	-47.5	-112.5	-192.25		2096	-234.5	-213.75	-202
	2622.5	-46.5	-118.5	-188.25		2098	-232	-215.25	-197.75
	2625	-48.5	-119	-193.25		2100	-234.75	-211.5	-199.25
	2627.5	-52	-112	-197.5		2102	-232.75	-209.75	-202
	2630	-51.25	-116.25	-194.75		2104	-232.75	-209.5	-201.5
	2632.5	-47.25	-113	-197.25		2106	-234.25	-210	-202.5
	2635	-48.25	-113	-190.75		2108	-231	-212.25	-205.25
	2637.5	-46.5	-117.25	-195.75		2110	-233.25	-214.5	-201.75
	2640	-48.25	-115.5	-191.75		2112	-232.25	-215	-203
	2642.5	-48	-117.25	-196		2114	-234	-210.5	-204
	2645	-48	-112.25	-191.5		2116	-231.25	-210	-200.75
	2647.5	-54.5	-108	-194		2118	-229	-215.75	-199.5
	2650	-52.25	-109.5	-196.25		2120	-231.75	-211.5	-205
	2652.5	-44.75	-112.75	-194.25		2122	-229.25	-206	-200.5
	2655	-49.5	-119.25	-194.25		2124	-233.5	-212.75	-199.5
	2657.5	-45	-115.75	-193.5		2126	-232.5	-214.5	-200.25
	2660	-49	-114.25	-194.5		2128	-236.75	-207.25	-202.25
	2662.5	-53	-120.25	-197.75		2130	-230.5	-210.5	-197.5
	2665	-50.75	-109.75	-198.75		2132	-234.5	-211.75	-201.5
	2667.5	-53.75	-118.25	-194.75		2134	-232	-214.25	-206.5
	2670	-50	-116	-196		2136	-235.5	-210.25	-200.5
	2672.5	-45.5	-118.5	-193.5		2138	-233	-210.25	-199.5
	2675	-50	-120	-194.5		2140	-232.25	-208.25	-200.25
	2677.5	-51.25	-110.75	-192.5		2142	-232.75	-208	-202
	2680	-48.25	-114.25	-192.5		2144	-234.5	-209.75	-203.75
	2682.5	-51	-111.75	-192		2146	-234.5	-212.75	-199
	2685	-50	-114	-195		2148	-231.75	-214.5	-204.25
	2687.5	-51.25	-119.5	-197		2150	-235.25	-209.75	-206.25
	2690	-51.75	-120	-193.25		2152	-234.25	-210	-202.5
	2692.5	-46.25	-113	-195		2154	-231.75	-214.5	-195.5
	2695	-47.25	-119	-189		2156	-231.25	-213	-199.25
	2697.5	-53.5	-115.5	-191.5		2158	-231	-206.75	-203.25
	2700	-49.25	-111	-195.25		2160	-231.25	-213.75	-202
	2702.5	-44.25	-116.75	-193.75		2162	-231.25	-207.75	-195.25
	2705	-47.75	-116.75	-191.5		2164	-237	-211.5	-202.25
	2707.5	-46.25	-117.25	-189.75		2166	-234.75	-213.25	-199.5
	2710	-49.25	-116.5	-193.5		2168	-236.25	-211.5	-199.25
	2712.5	-49.75	-115.75	-191.75		2170	-232.5	-218.5	-205
	2715	-46.25	-117.25	-196.5		2172	-234.25	-209.75	-199.5
	2717.5	-50.5	-117.25	-196.5		2174	-227.25	-210.25	-199.75
	2720	-45.5	-118.75	-193.5		2176	-230	-212.75	-198.75
	2722.5	-47.5	-114	-186.75		2178	-231.75	-207	-200.5
	2725	-51.75	-120.25	-190		2180	-230	-211.5	-204.5
	2727.5	-47.5	-116.25	-195.5		2182	-232.75	-211.5	-198.75
	2730	-50.5	-114	-193.25		2184	-229.5	-211.25	-196.75
	2732.5	-51	-114.25	-193.75		2186	-228	-209.25	-203
	2735	-47.5	-117.25	-195		2188	-234	-216.25	-200
	2737.5	-51	-113.75	-191.25		2190	-229.5	-209.25	-202.5
	2740	-47.75	-118.5	-189.75		2192	-233	-208.5	-194
	2742.5	-49.25	-115	-194.5		2194	-233	-210.75	-197
	2745	-45.25	-115.25	-196		2196	-233.5	-208	-200.5
	2747.5	-53	-114.25	-195.75		2198	-232	-212.25	-197.75
	2750	-50.75	-113.75	-198		2200	-232.25	-209.5	-208.75
	2752.5	-44.25	-112.5	-193.75		2202	-232.25	-213.25	-202.25
	2755	-46	-113	-193		2204	-234.75	-212	-197.25
	2757.5	-45.25	-118.25	-191.25		2206	-232.5	-215	-202.5
	2760	-45.5	-118.5	-193.5		2208	-234.25	-214	-199.25
	2762.5	-50.5	-115	-195.75		2210	-231.75	-211.5	-206.25
	2765	-44.75	-116.75	-197.75		2212	-230.5	-209.5	-201
	2767.5	-49	-113.25	-197		2214	-233.5	-214.5	-202.5
	2770	-42.75	-117.5	-199.75		2216	-234	-211.25	-201.75
	2772.5	-43.25	-113.25	-190		2218	-233.25	-215.25	-191.25
	2775	-44	-125.75	-193		2220	-232.5	-211	-199.25
	2777.5	-43.25	-117.25	-193.5		2222	-232.25	-211.25	-205.5
	2780	-49.75	-115.5	-197.75		2224	-230.75	-209.25	-199.25
	2782.5	-51	-114.25	-197.75		2226	-232	-212	-200.5
	2785	-42.75	-116.75	-196		2228	-231.75	-206.75	-199.25
	2787.5	-43	-115.5	-193.25		2230	-232.75	-211.75	-202.25
	2790	-51.75	-118.25	-196		2232	-233	-214.25	-201
	2792.5	-43.25	-116.5	-194		2234	-230.75	-212.75	-202.25
	2795	-49.75	-116.25	-195.75		2236	-230.5	-213.75	-198.5
	2797.5	-48.25	-114.25	-194		2238	-234.25	-210.75	-200.75
	2800	-45.25	-115.5	-193.5		2240	-234.25	-218	-203.5
	2802.5	-47.25	-116.75	-193.5		2242	-232	-216.5	-201.75
	2805	-44.5	-117.5	-192.5		2244	-233.25	-205.25	-198
	2807.5	-46.5	-122	-189.5		2246	-232.5	-208.75	-200.5
	2810	-48	-119	-192		2248	-230.5	-212.5	-202.25
	2812.5	-48.75	-114.5	-199		2250	-232.75	-210.25	-200.75
	2815	-52.75	-120.25	-192.25		2252	-227.5	-212.75	-201.25
	2817.5	-50	-114	-194.5		2254	-235.25	-214.25	-203.5
	2820	-52	-116.75	-193.75		2256	-232.75	-212	-202.25
	2822.5	-46.25	-114.25	-195.75		2258	-232.5	-210.75	-200.5
	2825	-44	-121.5	-194.75		2260	-224.25	-211	-201.25
	2827.5	-49.25	-116.75	-193		2262	-228.25	-213	-205.25
	2830	-47.75	-119.25	-195.75		2264	-227.5	-214.75	-203.75
	2832.5	-45.75	-110.75	-198		2266	-230.75	-217	-202.5
	2835	-50	-112.25	-193.75		2268	-235.5	-212.25	-202.5
	2837.5	-49.25	-119.75	-190.75		2270	-231.5	-211.5	-202
	2840	-44	-114.75	-196.25		2272	-229.5	-214.75	-203.25
	2842.5	-48.75	-118.75	-194		2274	-230.75	-213.25	-197.5
	2845	-48.25	-120.25	-193.25		2276	-231.25	-211.25	-201.5
	2847.5	-51.75	-117.75	-191.25		2278	-230.75	-213.75	-204.5
	2850	-53	-106.5	-192		2280	-229.5	-214	-198.5
	2852.5	-48.25	-117.25	-191.75		2282	-228.25	-213.75	-204.5
	2855	-46.75	-116	-197.5		2284	-232.5	-212.75	-202.25
	2857.5	-44.75	-114.25	-189.75		2286	-230.5	-212	-200.25
	2860	-46.75	-119	-196.5		2288	-232.75	-211.25	-204.25
	2862.5	-50.5	-114.5	-197.5		2290	-227.75	-217	-205.5
	2865	-48.25	-113	-195.5		2292	-233	-212	-198.75
	2867.5	-48.75	-117	-191.75		2294	-234	-214.25	-200
	2870	-49.25	-117	-194.75		2296	-227.5	-210	-199.75
	2872.5	-48.5	-118.25	-195.25		2298	-231	-211.75	-203.25
	2875	-45.25	-119.5	-194.75		2300	-235	-214	-202.5
	2877.5	-47	-113.5	-194.25		2302	-233	-214	-201.25
	2880	-51.25	-115.25	-197.75		2304	-233.25	-211.75	-203.25
	2882.5	-45.75	-120	-195.75		2306	-232.25	-215.25	-201.75
	2885	-49	-111.75	-196.75		2308	-233.75	-211.5	-203.75
	2887.5	-46.25	-119.75	-193.75		2310	-231.5	-207.75	-198.5
	2890	-46	-115.75	-193		2312	-236.25	-207.75	-204.5
	2892.5	-44.75	-116	-197.75		2314	-232.25	-211.75	-195.75
	2895	-45	-115.75	-193.5		2316	-231.25	-216	-202.5
	2897.5	-50.5	-120	-194.5		2318	-232.75	-211	-201.25
	2900	-47.75	-113	-198		2320	-232.5	-213.25	-200.75
	2902.5	-43.75	-113	-193.5		2322	-231.5	-211	-199.5
	2905	-46.75	-118.5	-194		2324	-233	-209	-197.75
	2907.5	-47.25	-118.5	-191		2326	-231	-216	-199.5
	2910	-45.75	-123	-193.25		2328	-230.25	-214.5	-205
	2912.5	-44	-116	-198.75		2330	-235.75	-211	-204.25
	2915	-50.5	-118.5	-201.5		2332	-231.5	-208.25	-201.25
	2917.5	-51.25	-116.75	-196.75		2334	-228.25	-210	-206
	2920	-47	-114.75	-192.5		2336	-233	-210	-201.5
	2922.5	-51.5	-118.5	-196		2338	-234.75	-211.5	-202.75
	2925	-48.5	-119.25	-194.25		2340	-233	-213.25	-201.75
	2927.5	-48.25	-115.25	-191.75		2342	-231	-215.75	-197.75
	2930	-50.75	-115.75	-199.5		2344	-227	-213.75	-201
	2932.5	-50.25	-111.25	-193.25		2346	-226.75	-210.5	-206.5
	2935	-46	-115.5	-194		2348	-231.5	-210	-198.25
	2937.5	-44.25	-120	-192.75		2350	-233.25	-215	-202.25
	2940	-46	-116.25	-191.25		2352	-233	-212.25	-199.75
	2942.5	-49.25	-116.75	-196.5		2354	-232.25	-212.5	-201.75
	2945	-48.5	-120.5	-193.5		2356	-229.75	-213.75	-202.75
	2947.5	-49.25	-118.25	-190.5		2358	-231.25	-213.25	-202
	2950	-51.25	-111	-197.25		2360	-228.25	-211.25	-204.25
	2952.5	-44.75	-115.75	-191.75		2362	-226.25	-213.25	-201.5
	2955	-47.75	-114	-194.5		2364	-230.75	-211.25	-201.5
	2957.5	-44.75	-113.25	-191.75		2366	-230.75	-210.25	-205.25
	2960	-45.5	-120	-195		2368	-232.25	-212.25	-198.5
	2962.5	-46.75	-118.25	-195.25		2370	-232.25	-209	-207.25
	2965	-47.25	-113.5	-196.75		2372	-232.25	-211.75	-205.25
	2967.5	-44.5	-116.25	-198.5		2374	-230	-216	-199.75
	2970	-45	-114.5	-195		2376	-230	-210	-203.5
	2972.5	-46	-116.75	-194		2378	-231.75	-213.75	-202.25
	2975	-44.75	-122.75	-195.75		2380	-232.25	-210	-203.75
	2977.5	-50	-115	-195.75		2382	-231	-210.25	-204.5
	2980	-52.25	-120.5	-194.5		2384	-227.75	-213.25	-206.5
	2982.5	-51	-115.25	-196.25		2386	-233	-210.75	-200.5
	2985	-45	-117	-194.25		2388	-238.25	-214.5	-198.75
	2987.5	-47.75	-116.75	-194.75		2390	-233.25	-212.25	-198.75
	2990	-47.5	-115.25	-195.25		2392	-228.75	-212.75	-203
	2992.5	-49	-120	-196.75		2394	-233.75	-210.75	-206.5
	2995	-52.25	-117.75	-193.25		2396	-235.25	-208.5	-205
	2997.5	-54.25	-116	-198.5		2398	-235.25	-214.25	-202.25
	3000	-48.5	-115.75	-196.5		2400	-231.75	-214.25	-204.5
	3002.5	-48.5	-116.75	-193.75		2402	-235.25	-210	-200.25
	3005	-48.75	-121.5	-194.75		2404	-231.75	-208.5	-201
	3007.5	-47.25	-121.5	-196		2406	-236	-208	-203
	3010	-48.5	-123.75	-199.75		2408	-232.75	-213.25	-206.5
	3012.5	-47.5	-113.5	-193.5		2410	-234	-210.5	-203.25
	3015	-46.75	-116.25	-196.5		2412	-235.25	-208.25	-205
	3017.5	-51	-115.25	-199		2414	-230.25	-206.5	-201.5
	3020	-47.25	-118.25	-197.75		2416	-233	-211.5	-198.75
	3022.5	-43	-119	-201		2418	-229.5	-216	-204.25
	3025	-52.5	-119.75	-192		2420	-235.75	-211.5	-204
	3027.5	-48.25	-116.75	-197.25		2422	-234	-213.75	-200
	3030	-52.25	-119.75	-195		2424	-229.5	-214.75	-202.5
	3032.5	-50	-111.5	-197.25		2426	-229.25	-209.5	-201.25
	3035	-51.5	-112	-196.25		2428	-231.75	-215	-203
	3037.5	-48.75	-118	-194		2430	-234.5	-206.5	-203.5
	3040	-45	-119.25	-196.25		2432	-234.5	-212.5	-204
	3042.5	-45.5	-116.75	-195.5		2434	-232.75	-212.25	-201.5
	3045	-55	-114.25	-195		2436	-236.5	-215.25	-202.75
	3047.5	-45	-115.5	-194.5		2438	-235	-210.25	-202
	3050	-50	-114.25	-198		2440	-231	-210.25	-203.75
	3052.5	-50.25	-117.75	-193.75		2442	-230.25	-211.25	-206
	3055	-44.5	-113.5	-191.75		2444	-228.5	-215.25	-201
	3057.5	-47.25	-116.5	-195		2446	-239	-211	-203
	3060	-48.75	-120.25	-193.5		2448	-233.5	-208.75	-199.25
	3062.5	-49	-112.75	-193.5		2450	-230.75	-209.25	-198.75
	3065	-49.5	-114	-194.75		2452	-232.25	-206.75	-200
	3067.5	-49.5	-114	-193		2454	-228.25	-211.75	-202.25
	3070	-47.25	-118.75	-199		2456	-231.25	-210.5	-203.5
	3072.5	-40.5	-119.75	-192.5		2458	-234	-213	-205.5
	3075	-49	-121.5	-193.5		2460	-235.75	-214	-203.5
	3077.5	-47	-117	-197.5		2462	-235.5	-212.25	-198.5
	3080	-43.75	-117.25	-196.5		2464	-230.5	-211.75	-203.5
	3082.5	-44	-116.25	-200.5		2466	-233.5	-211.5	-199.25
	3085	-53.25	-111.75	-198.25		2468	-237.5	-212.5	-198.75
	3087.5	-46.25	-119.25	-192.75		2470	-231	-209	-200.5
	3090	-47.25	-117.25	-189.5		2472	-235	-211.5	-204
	3092.5	-44.75	-114	-195.75		2474	-234	-216	-199.75
	3095	-48	-118.5	-198		2476	-233.5	-214.25	-201.75
	3097.5	-47.75	-114.5	-197.75		2478	-232	-211.75	-205.25
	3100	-45.5	-118.75	-200.25		2480	-228.5	-212.25	-199.25
	3102.5	-44.5	-117.25	-195.5		2482	-233.25	-208	-199.5
	3105	-47.5	-117	-192.5		2484	-234	-209.25	-201.75
	3107.5	-47.75	-120.75	-194.25		2486	-233.25	-215.25	-203.5
	3110	-51.5	-122.25	-197		2488	-237	-208.75	-200.25
	3112.5	-47.25	-118.5	-194		2490	-233.75	-210.75	-203
	3115	-45.25	-117.75	-196.5		2492	-231.25	-210.5	-202.75
	3117.5	-45	-112.75	-193.5		2494	-228.25	-210.75	-202.75
	3120	-49.75	-116	-191.25		2496	-231.75	-209.75	-204
	3122.5	-49.5	-121.75	-192.25		2498	-231.5	-214	-202
	3125	-42	-117.25	-194.5		2500	-231	-214.5	-200.75
	3127.5	-46.5	-119	-195.25		2502	-236.25	-211.25	-199.75
	3130	-50	-117.75	-194		2504	-232.25	-211.25	-203.25
	3132.5	-52.5	-113.25	-194.75		2506	-233	-213.25	-201
	3135	-46.5	-117.25	-189		2508	-234.75	-212	-196.5
	3137.5	-48.25	-117.75	-194.25		2510	-231.25	-211.75	-199.75
	3140	-44	-115.5	-189		2512	-229.75	-204.75	-202.75
	3142.5	-50.25	-119.25	-191.5		2514	-233	-210.25	-199.25
	3145	-47.25	-120.75	-197.75		2516	-234.75	-212.25	-207
	3147.5	-50	-115.5	-195		2518	-232	-213.5	-201.25
	3150	-49.5	-120	-194.5		2520	-229.75	-212.5	-206
	3152.5	-52.25	-116.75	-190.75		2522	-234	-210.5	-201.5
	3155	-47.75	-118.75	-191.5		2524	-234.5	-207.75	-203
	3157.5	-45.25	-119.5	-188.5		2526	-234.75	-211	-205
	3160	-45	-117.5	-194.25		2528	-230	-212.75	-206
	3162.5	-49.75	-120	-195.5		2530	-234	-207	-206.25
	3165	-52	-115.75	-197.75		2532	-228.75	-211	-206.25
	3167.5	-42.75	-117.25	-194.5		2534	-234	-214.25	-198.5
	3170	-46	-117.75	-196.25		2536	-235.75	-214.5	-202.75
	3172.5	-45.75	-116	-198		2538	-234.5	-209.75	-206
	3175	-44	-116.75	-192.75		2540	-235.25	-209	-205.75
	3177.5	-44	-120.75	-194.75		2542	-232.25	-211	-202.5
	3180	-49	-119.5	-196		2544	-231.25	-213.5	-201.5
	3182.5	-46.25	-117.5	-197.75		2546	-237.25	-216.75	-199
	3185	-45.5	-116	-194		2548	-231.5	-210.25	-205.25
	3187.5	-49.25	-114.25	-195.25		2550	-233.75	-217.75	-203
	3190	-43.75	-121.75	-193		2552	-231.25	-210.5	-201.25
	3192.5	-50.25	-120.25	-195		2554	-235.25	-211.5	-200.75
	3195	-48.5	-115.5	-195.25		2556	-229.5	-213.75	-203.25
	3197.5	-52	-120.5	-196.25		2558	-232.5	-213.5	-203.75
	3200	-49.5	-115.5	-200.5		2560	-232.75	-211.5	-206.75
	3202.5	-49.25	-116.25	-196.5		2562	-231.5	-210.5	-201.75
	3205	-45.25	-117.25	-192.25		2564	-230.75	-212	-201.25
	3207.5	-46.75	-118	-189.5		2566	-235.5	-211.5	-204
	3210	-42.5	-122.25	-191.75		2568	-234.75	-214	-203
	3212.5	-43.5	-118.75	-195.25		2570	-236	-212.25	-201
	3215	-47.25	-121	-196.5		2572	-234.5	-210.75	-200.75
	3217.5	-48	-115.25	-194		2574	-236.75	-213.5	-206
	3220	-47.5	-116.75	-194.25		2576	-235	-213	-203.25
	3222.5	-41	-120.75	-191.75		2578	-230.25	-212.5	-205.75
	3225	-47.25	-119	-188		2580	-230.5	-209.75	-202.75
	3227.5	-45.75	-115.25	-199		2582	-234	-211.5	-201.5
	3230	-49.25	-116	-194		2584	-231.25	-213.25	-205.5
	3232.5	-50.5	-116.5	-197.5		2586	-231.75	-211.5	-201.75
	3235	-48.5	-113	-196		2588	-232.75	-207.5	-205
	3237.5	-48.75	-116.5	-200.25		2590	-232	-211.75	-205.5
	3240	-46.5	-118.25	-193		2592	-237.25	-210.5	-204.75
	3242.5	-46.75	-117.5	-192.5		2594	-237.5	-209.25	-203.25
	3245	-52.25	-115.5	-195.75		2596	-230.75	-210.75	-198.75
	3247.5	-49.5	-115.5	-194.25		2598	-234	-210.5	-202.75
	3250	-42.5	-116.5	-195		2600	-232.25	-212.75	-204
	3252.5	-48.25	-112.5	-194		2602	-232.25	-212.5	-199
	3255	-44.5	-122.25	-190		2604	-234.5	-217.5	-203.25
	3257.5	-41	-118.75	-190.25		2606	-230.25	-211.25	-200.75
	3260	-49.75	-120.75	-193.25		2608	-237.25	-208	-204
	3262.5	-43	-118.75	-193		2610	-232.25	-210.75	-207.5
	3265	-48	-117.5	-196.5		2612	-233	-213.75	-208.75
	3267.5	-48.5	-117	-193.5		2614	-235	-208.25	-205
	3270	-47.25	-114.25	-194.75		2616	-235.75	-209	-203.25
	3272.5	-45.5	-111.75	-195		2618	-235.5	-210.75	-201.25
	3275	-50	-116.5	-193.25		2620	-233.75	-214.75	-203.75
	3277.5	-46.5	-117.5	-194.75		2622	-234.5	-213	-205.75
	3280	-47.25	-119	-194.75		2624	-232.25	-215.75	-200.25
	3282.5	-48.25	-115	-196.75		2626	-233	-212.5	-201.5
	3285	-47.5	-111	-194		2628	-235.25	-206	-209
	3287.5	-40	-116	-193.25		2630	-237.75	-208.5	-204.25
	3290	-45.25	-114.75	-191.5		2632	-238.5	-215	-196.5
	3292.5	-45.25	-119	-194.75		2634	-235.25	-218.75	-201
	3295	-47.75	-115.25	-195.5		2636	-229	-216	-204.25
	3297.5	-52.75	-118.5	-196.5		2638	-232.5	-211.25	-203.5
	3300	-46	-120.5	-195		2640	-235.25	-211.25	-204
	3302.5	-49.25	-119	-192.75		2642	-228.75	-209.5	-203
	3305	-48.25	-118.75	-191.25		2644	-230.5	-211.75	-201.75
	3307.5	-45.25	-120	-192		2646	-228	-208.25	-199.75
	3310	-48.5	-116.5	-195.5		2648	-234.5	-208.25	-207.75
	3312.5	-49	-120.75	-192.5		2650	-231	-212.75	-203.75
	3315	-47.75	-119	-200		2652	-232.5	-212.5	-200.25
	3317.5	-49.5	-113.75	-195.75		2654	-233	-212.75	-205.75
	3320	-43.5	-116	-193.5		2656	-235.5	-214.5	-200.5
	3322.5	-46	-123.75	-192		2658	-229.5	-217	-207.75
	3325	-49	-119	-193.75		2660	-238	-212.5	-200.25
	3327.5	-47.25	-116.5	-192.25		2662	-236.5	-209.75	-203.75
	3330	-45.25	-117.5	-190.75		2664	-236.75	-211.5	-199.75
	3332.5	-50	-117	-195.5		2666	-233.75	-214.25	-195.75
	3335	-48.25	-115.5	-192.25		2668	-235.25	-216.5	-207.75
	3337.5	-46.25	-119.75	-196.5		2670	-232.25	-211.5	-206.5
	3340	-43.5	-116.75	-191.25		2672	-233.75	-213	-203.25
	3342.5	-48.75	-111.75	-192.75		2674	-233.75	-215	-203.25
	3345	-49	-120	-195.25		2676	-230	-216	-205.25
	3347.5	-48.5	-120	-196		2678	-230.5	-210	-206.5
	3350	-45.75	-115.5	-196.25		2680	-235.25	-216	-203.5
	3352.5	-47	-121.5	-192.75		2682	-233	-212	-199.75
	3355	-44.75	-119	-191.75		2684	-230.25	-209.75	-201.75
	3357.5	-47.75	-117	-195.25		2686	-238	-215.25	-203.25
	3360	-45	-117.75	-196.25		2688	-229.75	-213.75	-208
	3362.5	-47.75	-117.5	-193		2690	-233.5	-214	-202.5
	3365	-50.75	-116.75	-198.25		2692	-232.5	-211.75	-204.5
	3367.5	-45	-115.25	-192.5		2694	-230.75	-211.5	-204.25
	3370	-44.5	-118.75	-190.5		2696	-230.75	-215	-208.5
	3372.5	-47	-118.75	-199		2698	-229.25	-220	-202.5
	3375	-49	-119.75	-194.25		2700	-230.25	-213.75	-204
	3377.5	-47.25	-122.25	-193.5		2702	-235.75	-213.75	-201.25
	3380	-46.25	-117	-195.5		2704	-237	-210.5	-202.5
	3382.5	-49	-113.5	-201.75		2706	-234.75	-210	-206.25
	3385	-49.25	-115.25	-195.25		2708	-232.75	-210	-209.25
	3387.5	-45.25	-120	-196		2710	-234.5	-215	-207.75
	3390	-43.25	-117.25	-194.5		2712	-230.75	-216	-205.25
	3392.5	-47.25	-119.5	-189.75		2714	-238.75	-215.25	-209.25
	3395	-46.5	-118.5	-195		2716	-231.25	-212	-208.25
	3397.5	-48.5	-120.75	-197.75		2718	-235	-211.75	-202.25
	3400	-45	-115.5	-196.5		2720	-234	-211	-198.5
	3402.5	-46.75	-119.25	-191.75		2722	-233.75	-215.5	-203.75
	3405	-45	-118.75	-194		2724	-231.75	-209.25	-203.25
	3407.5	-43.75	-122.5	-192.25		2726	-235.5	-211.25	-206.5
	3410	-45.75	-116	-195.75		2728	-230.5	-211.75	-206
	3412.5	-48.75	-118.75	-200		2730	-231.5	-215	-209
	3415	-48.75	-121.75	-198.75		2732	-233.75	-214.5	-199.75
	3417.5	-47.75	-116.25	-195.5		2734	-225.5	-211.25	-204
	3420	-45	-118.5	-193.5		2736	-233.25	-212.25	-202.5
	3422.5	-47	-115.75	-193.25		2738	-230.25	-212.5	-206.5
	3425	-46.75	-118.75	-191		2740	-227.75	-209	-204.25
	3427.5	-47.25	-117	-193		2742	-235.5	-209.75	-204.75
	3430	-47.25	-115.75	-195.75		2744	-232	-215.5	-204.5
	3432.5	-46.75	-116.5	-197.75		2746	-234	-211	-203
	3435	-48	-112.25	-190.5		2748	-229.25	-215.5	-205
	3437.5	-46.25	-115.25	-195.75		2750	-233.5	-212	-202
	3440	-46.75	-115.5	-189		2752	-233.25	-212.25	-200.5
	3442.5	-48	-120.25	-195.5		2754	-232.25	-213.25	-206.25
	3445	-47.5	-120.25	-197.5		2756	-230.5	-215	-204
	3447.5	-44	-113.75	-196.5		2758	-234.5	-215.25	-200
	3450	-48.5	-114.5	-199		2760	-232.5	-209	-202.25
	3452.5	-47.75	-118.25	-190.75		2762	-235.25	-210.5	-207.25
	3455	-42.75	-120.75	-194.25		2764	-234.75	-214.75	-206.75
	3457.5	-45.25	-117.25	-189.25		2766	-234.25	-211	-203
	3460	-45.5	-118.25	-196		2768	-228.75	-215	-204
	3462.5	-46.5	-119.75	-193.75		2770	-233	-212.25	-205
	3465	-43.5	-120.5	-198.75		2772	-232.75	-209.75	-200
	3467.5	-41	-116.25	-194.5		2774	-234	-216	-205.5
	3470	-44	-117	-195.5		2776	-235	-214.5	-206.5
	3472.5	-40	-118	-195		2778	-231	-210	-205.25
	3475	-45	-121.5	-192.5		2780	-233	-207.25	-202.5
	3477.5	-44.25	-118	-199		2782	-233	-214.25	-202
	3480	-48.75	-112.5	-192.25		2784	-234.25	-214.75	-201.25
	3482.5	-48.75	-116.25	-193		2786	-235	-213.25	-203.25
	3485	-47.75	-111.5	-193.75		2788	-232.5	-210.25	-202.75
	3487.5	-41.5	-117.25	-193.25		2790	-237.75	-207	-199.75
	3490	-41.25	-116.5	-189		2792	-229.75	-214.5	-201.75
	3492.5	-43	-121	-194.5		2794	-232	-211.5	-204.75
	3495	-44	-115.75	-197.25		2796	-230.75	-214	-202.25
	3497.5	-50.25	-122	-193.5		2798	-236.5	-215.25	-204.75
	3500	-50.75	-118.5	-194.75		2800	-226	-215.25	-206.25
	3502.5	-47	-121	-193.75		2802	-233.75	-214	-203.5
	3505	-45.5	-120.5	-190.75		2804	-232.5	-215.25	-204.5
	3507.5	-43.75	-118.5	-190.25		2806	-230.5	-211.5	-200.75
	3510	-49.75	-118	-191.75		2808	-234.25	-214	-203
	3512.5	-48.25	-114	-193.25		2810	-231	-214.25	-199.25
	3515	-47.5	-121.5	-200		2812	-230	-216	-201.25
	3517.5	-43.25	-114.75	-195.5		2814	-234.75	-212.5	-203.75
	3520	-39.25	-115.25	-185.75		2816	-233.75	-210.75	-204.25
	3522.5	-42	-118.5	-191.5		2818	-231.25	-212	-198.5
	3525	-43.75	-118.5	-195.25		2820	-232.75	-215.25	-203.5
	3527.5	-43.25	-118.5	-195.5		2822	-228.25	-214.5	-199.5
	3530	-46.75	-117.25	-193.5		2824	-232.5	-216.25	-207.25
	3532.5	-46.5	-118.75	-192.5		2826	-231.5	-210.75	-199.5
	3535	-50	-113	-191		2828	-231.25	-214.5	-199.25
	3537.5	-47.75	-121.25	-192.75		2830	-233.25	-214.5	-199.25
	3540	-44.5	-120.5	-189.75		2832	-229.75	-215.5	-202
	3542.5	-48	-113.75	-191.75		2834	-234.75	-214.25	-198.25
	3545	-48.75	-122	-194		2836	-235.5	-215	-201
	3547.5	-51.25	-115.25	-194		2838	-231.5	-212.5	-199
	3550	-47	-113.5	-192.75		2840	-232.75	-212.25	-200.75
	3552.5	-48.5	-115	-192.75		2842	-234.25	-212.75	-202
	3555	-51.25	-116.5	-186.25		2844	-233	-215.25	-203.5
	3557.5	-42	-118	-189.5		2846	-233.5	-216.5	-206.25
	3560	-49.5	-122	-189.25		2848	-233.25	-213.5	-202.25
	3562.5	-47.75	-114.75	-196		2850	-228.25	-214.75	-204.25
	3565	-48.5	-115.75	-194.25		2852	-229.75	-214.25	-204.5
	3567.5	-41.5	-117.75	-194		2854	-234.5	-213.75	-206
	3570	-43.75	-119	-191.5		2856	-230.5	-210.25	-199.5
	3572.5	-42.75	-119.25	-191.75		2858	-237.75	-211.75	-199.25
	3575	-47.25	-124.25	-193.25		2860	-235.5	-215.25	-200.75
	3577.5	-49.75	-118.25	-195.75		2862	-232.75	-210	-200
	3580	-47.25	-114.75	-189.75		2864	-233.25	-211.5	-205.25
	3582.5	-48	-114	-197.25		2866	-234.5	-210	-202.25
	3585	-50	-116	-190.75		2868	-228	-213.5	-200.25
	3587.5	-47.75	-119.75	-193.25		2870	-233.25	-210.75	-200.25
	3590	-48.25	-117.25	-196		2872	-235	-215.75	-202
	3592.5	-44.25	-120	-189.5		2874	-231	-214.5	-206
	3595	-44.5	-115.75	-194.5		2876	-233.75	-211.5	-203
	3597.5	-50	-119.25	-192.25		2878	-236	-209.25	-208
	3600	-44.5	-114.25	-196.5		2880	-232.5	-212.75	-205
	3602.5	-45.5	-119	-193		2882	-232.75	-216.5	-201.75
	3605	-51.25	-112.75	-194.75		2884	-228.5	-215	-202.5
	3607.5	-42.5	-115.75	-196.25		2886	-232	-218.25	-202.25
	3610	-43.75	-116.25	-193.75		2888	-237.75	-211.25	-205.25
	3612.5	-44	-112.5	-190.75		2890	-231.25	-215	-206.5
	3615	-47.25	-117.25	-197		2892	-236.5	-215	-200
	3617.5	-47.5	-112.25	-193		2894	-233.5	-216	-208
	3620	-45	-118.25	-196.75		2896	-234	-208.5	-204.25
	3622.5	-45.25	-117	-190.75		2898	-233.75	-214.75	-199
	3625	-47.75	-122.25	-191.75		2900	-232.25	-212.5	-202
	3627.5	-44.5	-115.75	-190.75		2902	-235.25	-215.25	-201.75
	3630	-47.25	-114	-199.25		2904	-235.5	-209	-203
	3632.5	-48.25	-117.5	-195.5		2906	-240.25	-214.75	-202
	3635	-48	-114.25	-191.75		2908	-237.5	-210	-200.5
	3637.5	-43.75	-117.25	-196		2910	-232.5	-215.25	-201.75
	3640	-44.25	-121	-190		2912	-235.25	-212.5	-200.25
	3642.5	-45	-118.75	-191.75		2914	-233.75	-214.75	-200.5
	3645	-49.75	-116.25	-193.5		2916	-233.5	-215.25	-204.25
	3647.5	-44.75	-115.5	-199.5		2918	-232.75	-212.25	-205.25
	3650	-41.25	-114.25	-195.25		2920	-236	-215.25	-201.5
	3652.5	-42.25	-116.75	-191		2922	-234.25	-217.25	-204.5
	3655	-43	-114.75	-192.25		2924	-235.5	-216.75	-205.75
	3657.5	-43.75	-113.25	-193		2926	-229.75	-212.5	-207
	3660	-50.75	-115.75	-195.5		2928	-234	-212.25	-205.25
	3662.5	-48	-119.25	-196.5		2930	-233.5	-212.75	-206.25
	3665	-46.75	-117.25	-199.25		2932	-236	-216.5	-203.5
	3667.5	-47	-115	-193.75		2934	-232.25	-213.75	-201.75
	3670	-49.75	-120.75	-194		2936	-237.25	-211.75	-206.25
	3672.5	-45.25	-118.5	-191		2938	-236	-217.25	-204.75
	3675	-42	-119.75	-188		2940	-234.75	-213	-205.25
	3677.5	-47	-116.75	-196		2942	-235.25	-214.5	-207.5
	3680	-50.75	-109.5	-196.5		2944	-234.25	-209.5	-200
	3682.5	-51.5	-121	-194.5		2946	-231.75	-213.5	-207
	3685	-49.75	-118	-193		2948	-233.75	-215.75	-204.25
	3687.5	-45	-117.75	-195		2950	-232.25	-210.5	-201.25
	3690	-48.5	-121.5	-190		2952	-235.5	-214.75	-202.75
	3692.5	-43.25	-120.75	-196		2954	-237.5	-212.5	-202.5
	3695	-50.75	-117.25	-199		2956	-235.25	-214.5	-203.5
	3697.5	-49.5	-113.75	-195.5		2958	-235.5	-216	-200
	3700	-48.5	-116	-192		2960	-231.5	-215.25	-202.5
	3702.5	-46	-115	-192		2962	-236	-215.75	-203
	3705	-44.25	-117.25	-191.5		2964	-230.5	-212.5	-202.25
	3707.5	-41.75	-118.75	-188.25		2966	-232.75	-210.25	-199.75
	3710	-48	-120.5	-193.5		2968	-230.25	-216.5	-202.5
	3712.5	-44.5	-116.75	-195.75		2970	-237.75	-210.5	-200.75
	3715	-49.5	-118.5	-198.75		2972	-236.25	-213.5	-207
	3717.5	-47	-116.25	-188.75		2974	-233.25	-211.25	-200
	3720	-48.5	-117.75	-191.75		2976	-237.25	-213.5	-201.75
	3722.5	-46.25	-120.25	-191		2978	-235	-213.25	-202
	3725	-44.75	-120	-193.5		2980	-237.75	-214.5	-206.75
	3727.5	-43	-120.75	-191.75		2982	-237.25	-210.25	-206
	3730	-48.75	-120	-197.25		2984	-232.5	-217.75	-207.75
	3732.5	-50	-110.5	-191.25		2986	-237	-212.75	-206.5
	3735	-46.5	-118	-190.5		2988	-236	-214	-206.75
	3737.5	-51	-122.5	-191.5		2990	-242.5	-210.25	-201.75
	3740	-45	-117.5	-191.75		2992	-232.5	-215.25	-209
	3742.5	-46.25	-119.25	-192		2994	-239	-208.75	-201.5
	3745	-49.5	-116.5	-192		2996	-232.5	-213.25	-201.5
	3747.5	-43.75	-118	-191.5		2998	-235.5	-215.25	-210
	3750	-46.25	-113.75	-190.75		3000	-231.75	-214	-207
	3752.5	-42.75	-116.75	-193.25		3002	-235.75	-208.75	-209.25
	3755	-46.25	-118	-191		3004	-229.25	-215.5	-200.25
	3757.5	-45.75	-117.75	-192.5		3006	-235.5	-210	-203.25
	3760	-50.5	-119	-194.5		3008	-235.5	-214.5	-206
	3762.5	-48	-116.75	-193.75		3010	-236	-211.25	-203.5
	3765	-49.25	-111	-199.5		3012	-234.5	-211.25	-204.75
	3767.5	-50.5	-115.5	-190.25		3014	-234.25	-214.25	-203
	3770	-48.5	-118.25	-191.5		3016	-233.5	-214.25	-198.25
	3772.5	-43	-119.5	-194.5		3018	-235.5	-212.75	-203.5
	3775	-46	-120	-188		3020	-230	-210.75	-205.5
	3777.5	-46.75	-119.5	-198		3022	-231.75	-214	-207.25
	3780	-49.25	-117.25	-197		3024	-235.75	-211	-202.75
	3782.5	-50.25	-116.75	-194		3026	-237.5	-207	-201.5
	3785	-45.25	-116.75	-194.75		3028	-236	-213.25	-206.25
	3787.5	-47	-119.25	-195.5		3030	-237.75	-213.75	-206.25
	3790	-42	-121	-194		3032	-229.5	-206.75	-206.75
	3792.5	-45	-116.75	-193.75		3034	-232.75	-209.5	-202
	3795	-46.5	-118.25	-195.75		3036	-238	-212	-202.75
	3797.5	-48.25	-113.25	-198.25		3038	-234.75	-215	-200.5
	3800	-48	-115.5	-197		3040	-235	-212.5	-205
	3802.5	-50.25	-114.75	-195.5		3042	-235	-213.5	-202.5
	3805	-46.75	-119.5	-189		3044	-227.75	-213.75	-203
	3807.5	-41.75	-118	-192.25		3046	-236.25	-211	-200.25
	3810	-44.5	-122.5	-192		3048	-233.25	-215.25	-202.75
	3812.5	-46	-122	-194		3050	-231.75	-209.75	-207
	3815	-49.25	-111.75	-195.25		3052	-233.5	-213.5	-208.25
	3817.5	-50.25	-117.5	-196		3054	-235.75	-210.25	-203.5
	3820	-45.25	-122	-193.5		3056	-237.75	-210	-206.75
	3822.5	-45.5	-123.25	-193.75		3058	-237	-208.25	-196.75
	3825	-43	-118.25	-192.25		3060	-238.25	-210.75	-202
	3827.5	-48.5	-121.5	-193		3062	-231	-211.75	-204.25
	3830	-49.75	-118.5	-196		3064	-236.25	-213	-204.75
	3832.5	-47	-115	-199		3066	-239.75	-215.5	-206.75
	3835	-46.25	-117	-194.5		3068	-237	-212.75	-205.75
	3837.5	-45.75	-118.25	-194		3070	-235	-209.5	-205
	3840	-42.25	-121	-190		3072	-237.25	-205.5	-206
	3842.5	-47.75	-116.25	-192.25		3074	-236	-210.75	-204
	3845	-52.75	-114.75	-190.75		3076	-236.75	-212.5	-200
	3847.5	-51.25	-117.25	-196		3078	-234.5	-210	-202
	3850	-48.5	-117	-193		3080	-227.5	-210.5	-206
	3852.5	-45.5	-115.5	-196.5		3082	-230	-215.75	-202.5
	3855	-43.75	-117.75	-195.25		3084	-235.25	-209.25	-202.25
	3857.5	-42.5	-118.5	-192.5		3086	-236.75	-210	-201.25
	3860	-49	-117	-194.5		3088	-235.75	-213	-203
	3862.5	-50.5	-122.25	-194.5		3090	-233.75	-211.75	-204.75
	3865	-48.75	-117.5	-199.75		3092	-236.75	-209.75	-205.75
	3867.5	-51.5	-113	-193.25		3094	-235.75	-212	-202.5
	3870	-47	-119.5	-195.25		3096	-237	-207	-206.5
	3872.5	-50	-120.25	-195.75		3098	-230.75	-209.5	-205.25
	3875	-46.5	-115.75	-191.5		3100	-231.5	-214.25	-201.75
	3877.5	-49	-118.25	-200.25		3102	-231.25	-210.5	-203.5
	3880	-44	-116	-194		3104	-235.25	-213	-203
	3882.5	-47.75	-115.25	-192.75		3106	-235.75	-212.5	-198
	3885	-47.25	-114.5	-195.25		3108	-230.75	-214.75	-201.5
	3887.5	-47	-114.25	-192.75		3110	-233.75	-212.75	-197.25
	3890	-42.5	-116.25	-192		3112	-236.25	-209.5	-201.5
	3892.5	-46	-120.75	-196		3114	-234.25	-211.5	-202.75
	3895	-49.5	-117.75	-195.75		3116	-237	-208	-204.75
	3897.5	-52.5	-116.75	-193.5		3118	-235.5	-214	-198.25
	3900	-48.5	-115.5	-191.5		3120	-236.5	-212	-202
	3902.5	-45.75	-117.25	-188.5		3122	-233.25	-204.5	-206.75
	3905	-44.75	-118	-198.25		3124	-238	-213	-204.25
	3907.5	-45.25	-119.5	-196.75		3126	-236.25	-210.5	-205.75
	3910	-49.25	-121.25	-192		3128	-236.75	-209.75	-200.25
	3912.5	-51	-116.75	-194		3130	-235.75	-207.5	-200.5
	3915	-50.5	-115.25	-196		3132	-233.5	-212.75	-204.5
	3917.5	-46.25	-118.25	-191.25		3134	-236.25	-211.75	-208.5
	3920	-50.25	-120.75	-190.75		3136	-236.5	-208.5	-203
	3922.5	-39.5	-119.75	-191		3138	-238.25	-210.25	-204
	3925	-44.5	-116.75	-194.25		3140	-236.75	-213	-201.5
	3927.5	-48	-114.75	-191.75		3142	-236.75	-205	-202.25
	3930	-46.75	-117.25	-194.25		3144	-237	-210.5	-205.25
	3932.5	-48.25	-116.25	-193.25		3146	-237.5	-218	-203.5
	3935	-43.75	-118.5	-190.75		3148	-236.5	-212	-202.5
	3937.5	-47.75	-118	-191.5		3150	-236.5	-214.5	-200.25
	3940	-43.5	-118.75	-192.75		3152	-236.5	-208.75	-205
	3942.5	-48.25	-119.25	-193.5		3154	-238.25	-212	-200.5
	3945	-47.25	-114	-196		3156	-235.25	-215.5	-198.75
	3947.5	-48.5	-121.25	-191		3158	-231.5	-208	-200
	3950	-45.5	-116	-191.75		3160	-239	-213	-205
	3952.5	-41.25	-116.5	-196.75		3162	-235.25	-214.5	-207
	3955	-44.25	-118	-196.25		3164	-237.25	-211.25	-201.75
	3957.5	-49.5	-122.5	-192		3166	-235.5	-215.75	-203
	3960	-49.25	-117.5	-192		3168	-234.25	-204.75	-198.5
	3962.5	-48	-118.5	-191.5		3170	-234.5	-217.75	-207.5
	3965	-46.5	-114.5	-197.75		3172	-241.25	-216	-202.25
	3967.5	-45.75	-115.75	-194.5		3174	-234.75	-209.75	-202.5
	3970	-48.25	-117.25	-196.75		3176	-234	-215.75	-200.75
	3972.5	-45.25	-122.5	-190.75		3178	-240	-209.5	-203.5
	3975	-44.5	-120.75	-190.75		3180	-232	-212.5	-205
	3977.5	-50.75	-119	-194.25		3182	-235.75	-209.5	-202
	3980	-49.25	-118.5	-191.25		3184	-239	-213	-206.75
	3982.5	-49.25	-114.5	-194.5		3186	-235.25	-215.75	-202.25
	3985	-49.75	-116.5	-198.25		3188	-238.25	-214	-200.5
	3987.5	-46	-117.75	-189		3190	-239.75	-214.25	-199.25
	3990	-50	-120.75	-191		3192	-237.5	-210.25	-202.25
	3992.5	-48	-121.5	-190		3194	-241	-215	-202.5
	3995	-44.5	-117.75	-192.75		3196	-237.25	-215.25	-210.75
	3997.5	-49.25	-118	-195.5		3198	-233.25	-210.5	-196.5
	4000	-50.5	-116.25	-193		3200	-238	-215.25	-200.5
	4002.5	-46	-115.25	-193.25		3202	-238.25	-217	-202.5
	4005	-42.5	-117.5	-195.5		3204	-233.25	-215.5	-198
	4007.5	-46.25	-116	-195.75		3206	-233	-214.25	-203
	4010	-46	-121	-193.75		3208	-232.75	-216.5	-206.25
	4012.5	-46	-118	-196.25		3210	-235.75	-216.75	-203.5
	4015	-50	-118.25	-195.5		3212	-236.75	-212.25	-201.5
	4017.5	-50.75	-115.75	-193.25		3214	-236.25	-212.25	-206.5
	4020	-43.5	-116.25	-195.25		3216	-234.5	-210.5	-201.25
	4022.5	-46	-118.25	-191.25		3218	-236.75	-211.5	-200.75
	4025	-45	-122.5	-189.25		3220	-233.25	-212.5	-202
	4027.5	-45.5	-116.75	-188.75		3222	-231.25	-208.25	-201.75
	4030	-45.25	-113.5	-193.25		3224	-241.25	-214.25	-202.75
	4032.5	-48.25	-118	-194		3226	-234	-213	-205.5
	4035	-45.25	-115.5	-192.25		3228	-240.5	-214	-205.5
	4037.5	-47.5	-120.75	-188.75		3230	-238	-219	-203.5
	4040	-48	-118.5	-191.75		3232	-236	-211.25	-203.75
	4042.5	-39.5	-115.75	-186.25		3234	-230.5	-215.5	-205.75
	4045	-46.25	-119.5	-199.75		3236	-235.75	-213	-206.25
	4047.5	-48	-119	-194		3238	-234.5	-214	-202.5
	4050	50.25	-119.5	-193.5		3240	-235.5	-212.5	-201
	4052.5	5.75	130.5	-166		3242	-240	-208.5	-203.75
	4055	-26.5	75.75	-157.25		3244	-234.75	-210	-207.75
	4057.5	-59.75	-244.25	-21.75		3246	-234	-209.5	-203
	4060	-218.25	-120.5	-113		3248	-237.25	-211.5	-202.5
	4062.5	-41.75	-95.5	-188		3250	-237	-215.25	-200.25
	4065	-47.25	-112.75	-195.5		3252	-240.25	-210	-202
	4067.5	-45.25	-114	-194.75		3254	-237.75	-213.75	-200.75
	4070	-41	-113.75	-189.5		3256	-238	-215.5	-207
	4072.5	-43.5	-120	-190.5		3258	-236.75	-209.5	-203.5
	4075	-49	-113	-191.25		3260	-236	-212.25	-204.5
	4077.5	-42	-118.25	-191		3262	-233.5	-211.5	-201
	4080	-43.25	-110.75	-191.75		3264	-233	-210.25	-205
	4082.5	-40.5	-117.25	-189.75		3266	-236.25	-212.25	-202.75
	4085	-41.75	-114.5	-186.75		3268	-234	-212.75	-203.5
	4087.5	-40.75	-114	-185.75		3270	-231.75	-214.25	-201
	4090	-40	-119.5	-186		3272	-239.25	-215	-201
	4092.5	-44	-120.25	-191.75		3274	-235	-210.5	-203.25
	4095	-42.75	-111	-189.5		3276	-238	-215	-202.25
	4097.5	-50	-111.75	-189.25		3278	-234.5	-212	-202.25
	4100	-47.5	-114.75	-192.75		3280	-235.75	-214	-202
	4102.5	-47	-113.75	-192.5		3282	-236	-216	-205.75
	4105	-44.5	-115	-190.75		3284	-234	-215	-204.75
	4107.5	-43.75	-117	-190		3286	-236.75	-207.75	-205.5
	4110	-45	-116.5	-190.25		3288	-239	-214.75	-203
	4112.5	-46.25	-115	-192.25		3290	-233	-209.75	-204
	4115	-48	-120	-196		3292	-236.5	-210.25	-203.75
	4117.5	-45.75	-114	-193.5		3294	-238.5	-215.5	-202.25
	4120	-45.75	-118	-191		3296	-238.25	-209.25	-204
	4122.5	-43.5	-120	-188.5		3298	-234.5	-213.5	-204
	4125	-48.25	-119	-186.5		3300	-234.75	-215.25	-202.75
	4127.5	-43	-116.5	-192.25		3302	-237.25	-218.25	-194.5
	4130	-46.5	-119.5	-193.25		3304	-235.25	-209.5	-200.5
	4132.5	-44.75	-118	-188.5		3306	-236	-217.5	-208.75
	4135	-44.5	-118.75	-196.25		3308	-236.5	-212	-202
	4137.5	-48.25	-120.75	-188.75		3310	-236.25	-211	-206.5
	4140	-43.25	-115	-185.5		3312	-233.75	-210.75	-206.5
	4142.5	-49	-115.75	-194.5		3314	-237.25	-209.5	-203
	4145	-46.25	-120	-191		3316	-231.75	-213.5	-202.25
	4147.5	-48.75	-115.75	-188.75		3318	-237.75	-217.75	-202.25
	4150	-50.5	-117.5	-192.75		3320	-233.25	-212	-200
	4152.5	-48.75	-119.5	-193		3322	-236.25	-211.25	-204.25
	4155	-47.25	-119.75	-192.25		3324	-236.75	-210	-206.75
	4157.5	-42	-118	-194.25		3326	-236.5	-214.25	-203
	4160	-46.5	-121.75	-190.25		3328	-233	-216.5	-200.25
	4162.5	-50.5	-117.75	-194.25		3330	-241	-214.5	-205
	4165	-48.25	-115.5	-199.25		3332	-239.25	-216.25	-207.25
	4167.5	-46.25	-116	-190.5		3334	-232.25	-213.75	-203.25
	4170	-45.5	-117	-195		3336	-239	-212.75	-203.5
	4172.5	-43.75	-116.5	-193		3338	-233	-211.25	-198.25
	4175	-43.75	-122.25	-193.5		3340	-236	-211	-200.5
	4177.5	-44.75	-120.75	-192.75		3342	-236.25	-211	-200.25
	4180	-48.25	-116.75	-196.25		3344	-234.25	-210	-199.5
	4182.5	-46.75	-119.5	-191		3346	-239.5	-215.5	-204.75
	4185	-48	-114.25	-196.75		3348	-235.75	-212.75	-204.25
	4187.5	-47.5	-118.75	-189.5		3350	-235.5	-207.5	-205
	4190	-43.5	-115	-183.5		3352	-232.75	-214	-201
	4192.5	-48	-118.25	-190.25		3354	-240	-216	-200.5
	4195	-47.5	-119.75	-189		3356	-232.75	-211	-201
	4197.5	-46.25	-120	-193.5		3358	-238.5	-212.25	-205.75
	4200	-48.5	-116.25	-190.25		3360	-235.25	-209.25	-203.5
	4202.5	-44.75	-118.25	-193.75		3362	-238.75	-210.5	-200
	4205	-44.25	-120.75	-190.25		3364	-229.5	-214.25	-205.5
	4207.5	-47.25	-119.75	-188.75		3366	-238.5	-212.25	-202.5
	4210	-49.5	-121.75	-191		3368	-236	-215.75	-203.75
	4212.5	-41.5	-115.75	-189.75		3370	-232.25	-212.75	-203.25
	4215	-46.75	-117.75	-194.75		3372	-237	-213	-206
	4217.5	-43.75	-117.75	-193		3374	-236	-212.25	-205.5
	4220	-45.75	-118.5	-191.25		3376	-234.25	-204.75	-204.25
	4222.5	-45.75	-123.75	-192.5		3378	-231.75	-209	-201.5
	4225	-46	-115.75	-190.5		3380	-235	-210.75	-205.25
	4227.5	-44.75	-117	-194.25		3382	-233.5	-212.5	-205
	4230	-45.5	-112	-195		3384	-235	-215	-204
	4232.5	-50.25	-118.5	-192.75		3386	-236	-211	-204
	4235	-43.25	-118.5	-193.25		3388	-234	-211.25	-203.75
	4237.5	-46.5	-116.5	-192.5		3390	-236.75	-211.25	-200.5
	4240	-44	-115.5	-186.75		3392	-234.75	-213.75	-207
	4242.5	-46.75	-120.75	-188.25		3394	-237.75	-208.75	-202.25
	4245	-43	-121.75	-192.75		3396	-239	-212	-203.5
	4247.5	-48.5	-119.25	-192.5		3398	-235.5	-214.5	-204
	4250	-42.25	-113	-196		3400	-236	-210.75	-200
	4252.5	-47.25	-118.75	-193.25		3402	-237.25	-209.75	-200
	4255	-44.75	-118	-191.75		3404	-235.75	-213	-201.5
	4257.5	-49.75	-116.25	-189.75		3406	-236.75	-214.25	-200.25
	4260	-50.25	-116.25	-190.25		3408	-236.75	-209.75	-199
	4262.5	-46.5	-120.25	-198.25		3410	-236	-207.75	-202.5
	4265	-48	-120.75	-191		3412	-231.25	-217.5	-208.5
	4267.5	-48.5	-122.25	-195.25		3414	-239.25	-211	-201.75
	4270	-47	-120.5	-193.75		3416	-238.5	-211.75	-205.25
	4272.5	-46.5	-116	-193.25		3418	-238.25	-211	-204.75
	4275	-43.75	-120.25	-185.75		3420	-234.25	-211.5	-207
	4277.5	-44.25	-117.75	-189.25		3422	-236.25	-211.5	-205.75
	4280	-51.25	-119.5	-189.75		3424	-236.25	-212.5	-207
	4282.5	-50.5	-118.75	-190.75		3426	-235.5	-209.75	-206.25
	4285	-45.25	-115	-192		3428	-239	-212.75	-204.25
	4287.5	-50.75	-116.25	-189.25		3430	-235.25	-212	-206
	4290	-46	-120.25	-190.25		3432	-234.75	-214.25	-203.5
	4292.5	-50	-122.25	-188.25		3434	-238.25	-217	-205.75
	4295	-50	-121.5	-192.25		3436	-237.25	-209.5	-203.75
	4297.5	-45.75	-118	-191.75		3438	-237.5	-213.5	-204.25
	4300	-45.75	-118	-190.25		3440	-234	-208.75	-206.75
	4302.5	-46.5	-114.25	-189.25		3442	-233.25	-214.25	-208
	4305	-43.25	-117.75	-187		3444	-236.25	-214.75	-203.75
	4307.5	-41.75	-119	-196		3446	-234.5	-218.25	-207.5
	4310	-46	-122.5	-189.5		3448	-235.75	-214.5	-204
	4312.5	-46.75	-115.75	-192.75		3450	-231.25	-207.25	-205.25
	4315	-45.5	-118	-193.75		3452	-231.25	-212.75	-204.5
	4317.5	-45.25	-115	-193.25		3454	-236.5	-211.75	-203.5
	4320	-51.25	-119.75	-191.25		3456	-232.5	-211.5	-203.5
	4322.5	-42	-115.75	-187.25		3458	-237	-212.25	-207.5
	4325	-43.5	-119.5	-188		3460	-236.5	-208.75	-210
	4327.5	-48	-120.5	-191.25		3462	-237.25	-210.25	-207.75
	4330	-50.25	-122	-194.25		3464	-237	-207.75	-203
	4332.5	-48.5	-115	-193.25		3466	-237.75	-216.25	-205.25
	4335	-47.5	-112	-191.5		3468	-234.5	-213.5	-205.75
	4337.5	-46.25	-117.25	-187.5		3470	-236.75	-215.25	-205.25
	4340	-44.5	-119.75	-190.25		3472	-241	-211.75	-203.5
	4342.5	-50	-121.25	-192.75		3474	-235	-213	-207.5
	4345	-48.25	-118.5	-192.25		3476	-233.25	-212.75	-207.5
	4347.5	-49.75	-116	-188.75		3478	-235.25	-209.5	-206.75
	4350	-49	-117.75	-194.75		3480	-232.75	-213	-205
	4352.5	-49	-115	-194.75		3482	-238.75	-217.75	-207
	4355	-40.75	-121.5	-188		3484	-235.75	-210.5	-203.5
	4357.5	-43.5	-118	-190.25		3486	-229.25	-212.75	-201.5
	4360	-46	-120.75	-192.25		3488	-231.75	-210.25	-201.5
	4362.5	-44.25	-119.25	-194		3490	-232	-210.25	-201
	4365	-49.25	-120.5	-193		3492	-236.25	-210.5	-205.25
	4367.5	-48.75	-119.75	-188.5		3494	-236.25	-210.75	-203.25
	4370	-45	-122.5	-187.75		3496	-234	-213.25	-206
	4372.5	-42	-119.25	-187.5		3498	-232.25	-211.75	-206.25
	4375	-45.5	-119.5	-192.25		3500	-232.25	-215.25	-205.75
	4377.5	-49.25	-118	-187.25		3502	-238	-211.75	-204
	4380	-49.25	-123.5	-191.5		3504	-238.5	-211.75	-204.75
	4382.5	-47.25	-122	-191.75		3506	-238.75	-214	-205
	4385	-45.25	-117.25	-187.5		3508	-240	-213.25	-205.75
	4387.5	-39	-121.5	-186.5		3510	-238	-213.75	-208.5
	4390	-41	-120.25	-187.75		3512	-232.75	-215	-203.75
	4392.5	-45.5	-119.25	-188		3514	-238	-215.75	-201.5
	4395	-46.25	-118	-187.75		3516	-237.75	-210.25	-205.25
	4397.5	-47.5	-118	-187.75		3518	-235	-217.25	-203.75
	4400	-44.5	-120	-192.75		3520	-235.5	-210.5	-203
	4402.5	-47.5	-118	-190.75		3522	-237	-209	-206.75
	4405	-40.5	-119	-193.75		3524	-236.25	-208.25	-205
	4407.5	-40	-117.75	-190.25		3526	-240	-205.5	-203.25
	4410	-38.5	-120	-190.25		3528	-234.75	-213.5	-206
	4412.5	-42	-115	-190.5		3530	-236	-210.5	-203
	4415	-45.5	-113	-186		3532	-237	-210.25	-204
	4417.5	-43.5	-116	-192.25		3534	-236.25	-215.25	-208
	4420	-47.25	-117.75	-190.75		3536	-235.25	-212.25	-206
	4422.5	-41.25	-119	-189.5		3538	-229.75	-210.75	-208.25
	4425	-41.25	-119.25	-187.5		3540	-240.75	-212.75	-211.5
	4427.5	-42.25	-116	-183.25		3542	-231	-212.25	-208.25
	4430	-44.75	-116.75	-188.75		3544	-236.25	-211.75	-205.5
	4432.5	-47.25	-112.75	-188.5		3546	-233.25	-214.5	-204.25
	4435	-43.75	-114.5	-188.25		3548	-231	-215	-207.75
	4437.5	-45	-116.25	-190.75		3550	-235.25	-218	-206
	4440	-43.25	-119.25	-185.5		3552	-236.75	-213	-206.5
	4442.5	-50.25	-118.75	-185.75		3554	-232.5	-213	-206
	4445	-56	-116	-188.75		3556	-236	-210	-205
	4447.5	-55.75	-119.75	-190.25		3558	-237.75	-213.25	-206.5
	4450	-48	-113.25	-190		3560	-234.25	-210	-207.25
	4452.5	-45.25	-112.75	-193.75		3562	-235.75	-214.25	-211.25
	4455	-50.5	-116	-186.25		3564	-234.25	-211	-210
	4457.5	-49	-116.75	-184.5		3566	-230.75	-216	-206.25
	4460	-48.25	-117	-187.25		3568	-234.25	-211.5	-206
	4462.5	-53.25	-113.5	-183.5		3570	-238.25	-212	-204.25
	4465	-53.25	-115.25	-191		3572	-228.75	-215.75	-206
	4467.5	-45.5	-110.75	-188.25		3574	-233.25	-215.75	-206.25
	4470	-48.25	-114.25	-188		3576	-233.5	-211.25	-200.75
	4472.5	-53	-115.5	-187.5		3578	-233.25	-211.75	-208.25
	4475	-49.25	-114	-184.25		3580	-234.5	-215	-205.5
	4477.5	-50	-110.75	-184.75		3582	-238	-217.5	-201
	4480	-53.25	-111.75	-186		3584	-235.75	-215	-206.75
	4482.5	-54.5	-113.75	-187		3586	-237.25	-214.75	-206
	4485	-51	-110.5	-185.5		3588	-233.75	-211.75	-209.25
	4487.5	-51	-112.75	-187		3590	-240.5	-214.25	-209.5
	4490	-48.25	-115.25	-185.75		3592	-231.5	-215.5	-206.25
	4492.5	-48.5	-119.75	-185		3594	-233.5	-212.25	-209.75
	4495	-52.5	-112.75	-187.25		3596	-232.75	-208.5	-203.75
	4497.5	-51.25	-110	-186.25		3598	-239.25	-212.75	-209.25
	4500	-49.25	-114.75	-188.5		3600	-237	-215.25	-207.25
	4502.5	-49	-112.75	-185.75		3602	-232	-213.75	-207.5
	4505	-50.5	-109.5	-183.25		3604	-238.5	-212.75	-204
	4507.5	-49	-114.5	-185.75		3606	-238.75	-214	-202.75
	4510	-47.25	-112.5	-185.25		3608	-235.75	-213.5	-206.5
	4512.5	-49	-114.5	-184.25		3610	-236.25	-215.5	-204.75
	4515	-54.5	-110	-187		3612	-234.25	-209.75	-201.5
	4517.5	-49.75	-110.25	-187.75		3614	-237	-211.75	-205
	4520	-45.25	-113.25	-187.5		3616	-234.75	-215.25	-203
	4522.5	-48.75	-118.25	-187.75		3618	-230.25	-208.5	-205.25
	4525	-49.75	-115.25	-180.25		3620	-237.5	-210	-203
	4527.5	-48.5	-113.25	-182.5		3622	-240	-216.5	-204.5
	4530	-49	-115.75	-184.75		3624	-239.25	-216.5	-209.25
	4532.5	-48.75	-112	-186.5		3626	-240	-216.5	-205
	4535	-48	-107.25	-184.25		3628	-236	-213.5	-204.75
	4537.5	-44.5	-114.25	-184.5		3630	-236.5	-210.75	-208.25
	4540	-49	-115.5	-185		3632	-230	-210	-209
	4542.5	-48.5	-115.75	-185.25		3634	-239.25	-214	-206.75
	4545	-45.25	-110.25	-186.75		3636	-230.5	-215	-209.75
	4547.5	-46.25	-110.25	-186.5		3638	-236.75	-212.5	-205.5
	4550	-49.5	-110	-189.75		3640	-230.75	-217.75	-208.25
	4552.5	-45.25	-109	-182.5		3642	-237.75	-211	-201.75
	4555	-46.25	-110.75	-184.5		3644	-234.25	-215.75	-210
	4557.5	-44	-113	-187.25		3646	-235	-213.75	-209.5
	4560	-48	-112.5	-184		3648	-233.5	-216.75	-210.25
	4562.5	-45.25	-108.75	-189.25		3650	-236.25	-213.75	-206.25
	4565	-50.25	-112	-188.5		3652	-231.5	-213.5	-206.75
	4567.5	-46.75	-111.5	-187.5		3654	-240.25	-216.75	-207.25
	4570	-49	-110.25	-187.5		3656	-236.5	-214.25	-207.75
	4572.5	-49.5	-111	-182.5		3658	-232.75	-213.75	-208.25
	4575	-47.75	-116	-184.5		3660	-234	-212.5	-210.75
	4577.5	-51	-110.75	-181.5		3662	-238	-213.75	-205
	4580	-45	-111.5	-187.25		3664	-233.5	-213.5	-207.5
	4582.5	-50	-108.25	-187		3666	-235	-214	-204.25
	4585	-44.5	-106	-187.75		3668	-233.75	-214	-205.25
	4587.5	-45.25	-109.5	-183		3670	-233	-217	-205.25
	4590	-47.75	-110.25	-186		3672	-234.25	-210.75	-206.25
	4592.5	-40	-112	-187.25		3674	-239.25	-214.5	-210
	4595	-44.75	-112	-189.25		3676	-236.5	-213.5	-205.25
	4597.5	-45	-110.25	-189.5		3678	-236.5	-214.5	-207.25
	4600	-44.5	-112.75	-187.5		3680	-240.5	-209.75	-209.25
	4602.5	-46.5	-111.25	-188.75		3682	-234.75	-213.25	-205.5
	4605	-37.75	-111.75	-185		3684	-233	-216.25	-203
	4607.5	-42.75	-116.75	-185.75		3686	-237.5	-214.25	-206.25
	4610	-45	-117.75	-186.75		3688	-232	-210.5	-206
	4612.5	-46.25	-112.5	-187.75		3690	-232.75	-217.75	-207.75
	4615	-46	-112.5	-188.5		3692	-240.5	-213.5	-212
	4617.5	-44	-110.75	-187		3694	-235.25	-220	-205.75
	4620	-49	-109.5	-184.75		3696	-232.75	-212.75	-207.75
	4622.5	-43	-108.75	-183.5		3698	-235	-216.25	-203.25
	4625	-42.75	-112.25	-182.25		3700	-235	-208.75	-212.75
	4627.5	-48	-112.75	-184		3702	-234.75	-212.75	-209.75
	4630	-43	-108.25	-187.75		3704	-236.25	-215.5	-205.5
	4632.5	-48.25	-114	-187.5		3706	-229.5	-214	-209.75
	4635	-43.75	-113.25	-190.75		3708	-237	-212.75	-209.5
	4637.5	-48.75	-111.75	-180.5		3710	-237.5	-213.25	-206.5
	4640	-42.75	-112.5	-187		3712	-228.5	-218.25	-203.25
	4642.5	-48.5	-113.5	-188.25		3714	-235.75	-209.5	-205
	4645	-49.5	-113	-185		3716	-232.5	-209	-212.25
	4647.5	-43.75	-107.25	-187.75		3718	-236.75	-217.25	-201
	4650	-45	-114.75	-186.5		3720	-232.75	-211.5	-204
	4652.5	-50	-116.75	-187.5		3722	-234.25	-211.75	-206.25
	4655	-41.75	-112.75	-188		3724	-234.75	-211.5	-204.5
	4657.5	-40.25	-109.5	-185.75		3726	-235.5	-213.25	-206.75
	4660	-46	-114.25	-186.5		3728	-235.5	-215	-207.75
	4662.5	-46.25	-111	-190		3730	-238.25	-213	-204.75
	4665	-44	-114.75	-188		3732	-238.25	-213.25	-206.75
	4667.5	-47.5	-108.75	-188.5		3734	-236.75	-212.75	-206.25
	4670	-46.5	-112.5	-184.5		3736	-235.75	-216	-211.25
	4672.5	-44.5	-115.5	-185.75		3738	-235.75	-211	-204.75
	4675	-44.5	-116	-185		3740	-235.25	-210.5	-207
	4677.5	-44	-112.5	-187		3742	-233.75	-210.25	-209
	4680	-47.75	-110.75	-188.75		3744	-236	-211.5	-206.75
	4682.5	-42.5	-109.75	-187.5		3746	-229	-217	-205
	4685	-46.25	-109	-185		3748	-235.25	-212.5	-207.75
	4687.5	-42.75	-114	-184.25		3750	-234.5	-216.75	-208.75
	4690	-40.5	-112.75	-185.25		3752	-238.5	-211	-204.5
	4692.5	-42.75	-114.75	-184.5		3754	-236.25	-215.75	-209.5
	4695	-47	-111	-188.25		3756	-231.75	-213.75	-203.5
	4697.5	-44.5	-110.75	-188		3758	-235.25	-211	-204.75
	4700	-47.25	-113	-188.25		3760	-233.75	-209	-206.75
	4702.5	-47.5	-112.5	-187.5		3762	-235.5	-213.25	-206.5
	4705	-42	-111.25	-187.25		3764	-233.5	-213.75	-204.5
	4707.5	-41.5	-115.25	-183.5		3766	-236.5	-210.5	-207.75
	4710	-42.75	-111.75	-187.5		3768	-239.25	-211.5	-209.25
	4712.5	-43.5	-111	-187.5		3770	-234.5	-209.75	-207.25
	4715	-47.25	-116.75	-191		3772	-236.25	-215.5	-203.75
	4717.5	-45	-108.5	-188.25		3774	-236.75	-214.75	-207
	4720	-45	-108.25	-183.5		3776	-235.5	-213	-205.5
	4722.5	-41.25	-117.25	-184		3778	-234.5	-216	-210.75
	4725	-39.75	-115.75	-183.5		3780	-235.25	-213.5	-205.5
	4727.5	-46.25	-113.5	-184.25		3782	-238.5	-218.25	-208.25
	4730	-44.5	-110.75	-184		3784	-234.25	-216.25	-207.5
	4732.5	-46.25	-115.5	-186		3786	-237.75	-213	-207.5
	4735	-41.5	-111.75	-188.5		3788	-238.25	-216.5	-206.25
	4737.5	-42.75	-113.75	-186.75		3790	-236.75	-216.75	-212.75
	4740	-41	-110	-182		3792	-235.25	-214.75	-205.25
	4742.5	-42.5	-115.5	-182.25		3794	-234	-214	-212.25
	4745	-45.25	-112	-186.5		3796	-233.5	-214	-208.25
	4747.5	-44	-109.75	-186.75		3798	-235	-215.25	-213.75
	4750	-43.75	-112.5	-188.5		3800	-238.5	-213.75	-203
	4752.5	-44.75	-115.5	-186.75		3802	-237.25	-212.5	-203.25
	4755	-42.5	-118.25	-187.75		3804	-235	-213.75	-206.5
	4757.5	-41.5	-113.5	-186.75		3806	-237.25	-217.5	-206.25
	4760	-43.25	-114.75	-187.5		3808	-236.25	-216	-208.25
	4762.5	-44.75	-112.75	-182.5		3810	-233	-210.75	-210.5
	4765	-47.25	-115.75	-188.25		3812	-237.5	-209	-205.75
	4767.5	-41.25	-110.5	-184.5		3814	-236.75	-214.5	-209
	4770	-39.25	-111.25	-185.25		3816	-233.5	-214.5	-206.25
	4772.5	-45.5	-114	-189		3818	-237.5	-213.75	-211
	4775	-44.25	-115.25	-180.5		3820	-234.5	-215	-207.25
	4777.5	-43.25	-115.75	-181.25		3822	-234.25	-217.75	-208.75
	4780	-45	-114	-187.75		3824	-237.75	-209.75	-204
	4782.5	-43.75	-112.25	-182.25		3826	-228	-211	-212.5
	4785	-43.5	-112.5	-180.75		3828	-234.5	-214	-204.75
	4787.5	-46.75	-112.75	-184.5		3830	-234.75	-212	-206.5
	4790	-41.25	-114.75	-183		3832	-236.5	-213.5	-206
	4792.5	-40.5	-117	-184.5		3834	-235.5	-218	-208
	4795	-45.25	-115.25	-184.25		3836	-229.75	-215	-205.25
	4797.5	-45.25	-113.25	-188.5		3838	-238.5	-214	-206.25
	4800	-46.25	-114.5	-185.5		3840	-234.75	-215.75	-205.75
	4802.5	-41	-111.5	-186		3842	-236.5	-212.75	-213
	4805	-44	-112.75	-188		3844	-234.25	-211.25	-206.75
	4807.5	-42.25	-118	-184.25		3846	-241.5	-219	-212.75
	4810	-42.5	-115.75	-188.75		3848	-234.75	-216.25	-206.25
	4812.5	-45	-113.75	-185.5		3850	-237.75	-212	-207.25
	4815	-50.5	-108.75	-186.5		3852	-232.25	-217.25	-211.75
	4817.5	-47	-113	-184		3854	-234.75	-221	-203.75
	4820	-42.25	-111.5	-187		3856	-234.75	-214.25	-212.75
	4822.5	-48.5	-113.25	-177.5		3858	-236.25	-214.25	-204
	4825	-44.5	-115	-184.25		3860	-236.25	-213.5	-206.5
	4827.5	-43	-111.75	-184.75		3862	-234.25	-214.75	-207.5
	4830	-46.75	-109	-182		3864	-233.25	-214	-206.75
	4832.5	-45.5	-111.75	-187		3866	-237.25	-220.25	-204.5
	4835	-42.25	-109.75	-186		3868	-235.5	-216.5	-211
	4837.5	-43.25	-109.75	-180.5		3870	-233.25	-214.25	-207
	4840	-42	-111.25	-177.75		3872	-235.25	-214.75	-207
	4842.5	-41.5	-117.25	-181.75		3874	-237.25	-214.25	-208.5
	4845	-46	-118	-180.75		3876	-234.5	-210.75	-210.75
	4847.5	-45.75	-108.75	-189.5		3878	-235.25	-215.25	-211.25
	4850	-43.5	-111	-182.75		3880	-238.5	-217.25	-211.25
	4852.5	-43.5	-113.25	-182.25		3882	-234	-214.5	-209
	4855	-42.75	-108.75	-178.75		3884	-237.25	-217.5	-209.5
	4857.5	-44.25	-113.5	-184.75		3886	-229.25	-213.75	-207.25
	4860	-41.5	-111.75	-180		3888	-235.25	-212.75	-208.75
	4862.5	-50	-113	-188		3890	-236	-211.5	-207
	4865	-48.5	-111	-181.5		3892	-235.25	-214	-210
	4867.5	-39.25	-107	-183		3894	-235.75	-216.25	-207.25
	4870	-44	-111.75	-181.75		3896	-235.75	-213.75	-210
	4872.5	-44.25	-111.25	-175.25		3898	-234	-218.25	-208.5
	4875	-44.5	-113.75	-181		3900	-238	-215	-209.25
	4877.5	-42	-110.5	-180.25		3902	-238.25	-211	-208
	4880	-41.75	-111.75	-181.25		3904	-237.25	-215	-208.75
	4882.5	-48.75	-109.5	-179.75		3906	-236.25	-215.5	-206.5
	4885	-43.5	-107	-183.75		3908	-232	-211.25	-208.75
	4887.5	-43.25	-110.25	-182		3910	-235.75	-208	-207
	4890	-44.5	-109.75	-176		3912	-236.5	-214	-209
	4892.5	-43.5	-111	-180.25		3914	-238.5	-215.5	-208.75
	4895	-39.75	-111.75	-181.5		3916	-238.25	-214.5	-209
	4897.5	-44.25	-106.75	-180.5		3918	-235.25	-210.25	-204.5
	4900	-45.75	-109.25	-183.75		3920	-237.75	-214	-207
	4902.5	-43.75	-103	-182.25		3922	-235.5	-216.5	-207.5
	4905	-41.75	-110	-182.5		3924	-231	-214.25	-212.5
	4907.5	-41	-113.25	-180.25		3926	-236.25	-214	-210.25
	4910	-42.25	-109.25	-179.25		3928	-235.75	-213.5	-204.75
	4912.5	-46.25	-111.5	-181.75		3930	-234.5	-210.25	-207
	4915	-48.25	-110.25	-183.25		3932	-224.5	-211	-205.25
	4917.5	-48.75	-106.5	-180		3934	-200.25	-177.25	-236
	4920	-43.5	-108.5	-181.75		3936	-215	-196	-195.25
	4922.5	-43.5	-105.5	-176.5		3938	-234	-218.25	-204.25
	4925	-42	-111.75	-176.5		3940	-238.5	-219.5	-205.5
	4927.5	-46.5	-112.5	-178.75		3942	-237.75	-221	-211.5
	4930	-46.5	-108.75	-180.25		3944	-237.25	-217.25	-209.5
	4932.5	-46.5	-109	-180		3946	-248.25	-209.75	-211.25
	4935	-43.25	-106.25	-180.75		3948	-235.75	-209	-207.25
	4937.5	-42.75	-111.5	-180		3950	-250.5	-214.75	-208
	4940	-39.5	-104.75	-175.75		3952	-236.25	-212.5	-212.5
	4942.5	-44.5	-110.75	-182		3954	-236.5	-209.75	-206.75
	4945	-49	-111	-181		3956	-233.25	-210.75	-203.5
	4947.5	-45	-109.75	-180.25		3958	-233	-210	-201
	4950	-42.25	-103.25	-182.75		3960	-236	-210.75	-205.5
	4952.5	-42.75	-107.5	-177.75		3962	-231.25	-211.25	-200.5
	4955	-43.25	-105.5	-175.25		3964	-231.25	-208	-198
	4957.5	-43	-109.5	-174.5		3966	-235	-204	-193.75
	4960	-46.75	-109.25	-179.25		3968	-230	-200.75	-185
	4962.5	-46.5	-107.5	-181		3970	-235.75	-199.25	-187.5
	4965	-46.25	-104.75	-181.75		3972	-234.25	-197.5	-186.75
	4967.5	-43.25	-105.75	-179.5		3974	-232.5	-192.25	-183
	4970	-42.25	-101.5	-171.75		3976	-228.75	-195.75	-184.75
	4972.5	-43.75	-100	-175		3978	-225	-185.5	-187
	4975	-43.75	-103	-177.75		3980	-231.75	-190.75	-184.25
	4977.5	-45.5	-112.25	-176.25		3982	-224	-188.25	-185.5
	4980	-44.25	-108	-177.25		3984	-218.25	-190.75	-181.5
	4982.5	-48.5	-106.5	-175.75		3986	-223.5	-191.75	-177
	4985	-45	-105.25	-175		3988	-221	-192.25	-182.5
[truncated: 505 more rows]
[truncated: 51 more columns]
