# Supplementary material for: Conserved allosteric inhibition mechanism in SLC1 transporters
Source: eLife. 2023 Mar 1;12:e83464. doi: 10.7554/eLife.83464 (PMC10017108; doi:10.7554/eLife.83464)
Supplement: Figure 7—source data 1. [file elife-83464-fig7-data1.xlsx]

## Sheet: Sheet1
Figure 7 original data		rASCT2F136Y/I237M-UCPH
Figure 7B	F136Y/I237M-UCPH																																Figure 7D	Ki-[Ser]						Figure 7E	Relative Current of rASCT2WT and mutants
		100µM Ser	100µM Ser+	100µM Ser+			Figure 7C	F136Y, I237M, F136Y/I237M UCPH dose dependent curve																																						Relative Current
	Time (ms)	control	100µM UCPH	200µM UCPH																													[Ser](µM)	F136Y/I237M		WT					exp1	exp2	exp3	exp4	exp5	exp6	exp7	exp8	exp9
	0	-377.25	-378.75	-378				F136Y																										Ki(µM)	SD	Ki(µM)	SD			WT(n=29)	-0.490196	-0.472222	-0.581395	-0.472222	-0.444444	-0.537037	-0.462963	-0.659091	-0.522727
	2	-376	-378	-380.5				100µM Ser	Relative Current (n=16)																								100	4.32	2.39	77.38	19.08			F136Y(n=13)	-0.136986	0.197368	0.0428571	0.0285714	0.2	-0.267442	-0.0484848	-0.153846	-0.0283019
	4	-375	-378.75	-376.5				[UCPH](µM)	exp1	exp2	exp3	exp4	exp5	exp6	exp7	exp8	exp9	exp10	exp11	exp12	exp13	exp14	exp15	exp16	ave	std							200	35.48	24.87	52.96	23.03			F136Y/I237M(n=21)	0.0510949	-0.173554	0	0.015873	0.0307692	-0.00636943	-0.139535	-0.0963855	0.153846
	6	-378.25	-378	-376				0	-1	-1	-1	-1	-1	-1	-1	-1	-1	-1	-1	-1	-1	-1	-1	-1	-1	0							300	80.67	15.47	79.45	22.76			I237M(n=7)	-0.714286	-0.727273	-0.721154	-0.820144	-0.655462	-0.669856	-0.691358
	8	-374	-380	-381.75				10	-0.76875	-0.671233		-0.6	-0.528571	-0.716667	-0.920635	-0.5	-0.915152	-0.923077	-0.886792	-0.71875	-0.737864	-0.862069	-0.811765	-0.857143	-0.761231	0.139858							1000	40.46	20.46	74.49	27.79			F135Y(n=11)	-0.808824	-0.90625	-0.40099	-0.413408	-0.622951	-0.75	-0.584416	-0.571429	-0.618182
	10	-374	-381.75	-377.5				50	-0.70625	-0.513699	-0.473684	-0.514286	-0.428571	-0.266667		-0.395349	-0.660606	-0.671329	-0.45283			-0.613027	-0.541176	-0.357143	-0.507278	0.130921
	12	-379.75	-382	-378				200		-0.136986	0.197368	0.0428571	0.0285714	0.2		-0.267442	-0.0484848	-0.153846	-0.0283019	0.3125	0.194175		-0.0411765	0.0816327	0.0292975	0.166152
	14	-375.25	-385.75	-375.75
	16	-378.25	-379	-371
	18	-378.5	-380.25	-378.5				I237M
	20	-381.25	-380.25	-377.25				100µM Ser	Relative Current (n=16)
	22	-378	-379.75	-377.25				[UCPH](µM)	exp1	exp2	exp3	exp4	exp6	exp7	exp8	exp10	exp11	exp12	exp13	exp14	exp15	exp16	ave	std
	24	-375.25	-377.5	-382.25				0	-1	-1	-1	-1	-1	-1	-1	-1	-1	-1	-1	-1	-1	-1	-1	0
	26	-377.5	-379.75	-379.5				10	-0.852174	-0.892857		-0.884615		-1.00763	-0.956835	-0.848739	-0.929471	-0.954248		-0.92	-0.977778	-1.03704	-0.932853	0.0581416
	28	-382.25	-382	-379.75				50		-0.9375	-0.876033	-0.951923	-0.754967		-0.870504	-0.739496			-0.794258			-0.975309	-0.862499	0.0851064
	30	-378.25	-382	-378.25				200		-0.714286	-0.727273	-0.721154			-0.820144	-0.655462			-0.669856			-0.691358	-0.714219	0.0498306
	32	-378.5	-380	-378.5
	34	-370.5	-380.75	-379.25
	36	-376	-381.75	-374.75				F136Y/I237M
	38	-374	-376	-375.75				100µM Ser	Relative Current (n=23)
	40	-375.5	-376.5	-374.75				[UCPH](µM)	exp1	exp2	exp3	exp4	exp6	exp7	exp8	exp10	exp11	exp12	exp13	exp14	exp15	exp16	exp17	exp18	exp19	exp20	exp21	exp22	exp23	ave	std
	42	-372.25	-381.5	-379.75				0	-1	-1	-1	-1	-1	-1	-1	-1	-1	-1	-1	-1	-1	-1	-1	-1	-1	-1	-1	-1	-1	-1	0
	44	-376.25	-380	-371				10	-0.306569	-0.347107	-0.222222				-0.271318				-0.194444							-0.580645		-0.352113		-0.324917	0.127415
	46	-378.75	-383.75	-379.5				50	-0.0656934	-0.264463	-0.177778	-0.0634921			-0.108527	-0.10241		-0.057971	-0.0902778					-0.485597		-0.253165	-0.383562	-0.323944		-0.198073	0.142965
	48	-380.5	-377.75	-379				200	0.0510949	-0.173554	0	0.015873	0.0307692	-0.00636943	-0.139535	-0.0963855	0.153846	0	0.00694444	0.111111	0.194175	-0.398551	-0.0540541	-0.037037	-0.221649	0.177215	-0.164384	-0.211268	0.102941	-0.0313722	0.148619
	50	-377.75	-382.75	-381.25
	52	-383.25	-381	-377
	54	-377.75	-377	-376.25
	56	-376.5	-380.5	-376
	58	-383.25	-379.5	-379.75
	60	-375.5	-381.25	-383.5
	62	-380	-379	-381.75
	64	-377.25	-378.75	-371
	66	-372.5	-383.25	-381
	68	-382	-383.75	-376.5
	70	-374.25	-377.5	-378.25
	72	-373.75	-379.75	-373.75
	74	-375.25	-378.25	-377.5
	76	-378.25	-382	-381.5
	78	-380	-381.75	-379
	80	-375.25	-376.25	-374
	82	-375.5	-381.75	-381
	84	-380.75	-381.25	-379.75
	86	-380.5	-381.75	-377.5
	88	-374	-376	-374.25
	90	-376.5	-379.25	-379.25
	92	-380.5	-381.5	-377.25
	94	-380	-378.5	-377.25
	96	-379	-380.5	-373
	98	-380	-381.5	-376.75
	100	-382.5	-376.5	-379.25
	102	-374.5	-381.5	-372
	104	-374.75	-380.75	-379
	106	-377.5	-378.5	-379.5
	108	-380.75	-380	-376
	110	-380.25	-379	-378.5
	112	-377.75	-379.75	-382.75
	114	-373.25	-383.5	-381.5
	116	-380.5	-377.75	-376.5
	118	-379	-384.25	-378.5
	120	-377.75	-378.25	-377.75
	122	-377.25	-381.25	-378.5
	124	-374.75	-379	-376.75
	126	-382.25	-377	-376.75
	128	-377.25	-384	-377
	130	-378.25	-385	-377.5
	132	-375.5	-383.25	-380.5
	134	-375	-380.25	-374.5
	136	-379.5	-378.25	-377.25
	138	-381.75	-389.25	-380.5
	140	-374.5	-381	-376.75
	142	-380.75	-377.75	-371.75
	144	-374.75	-381.75	-379.5
	146	-383	-385.5	-377.5
	148	-382.75	-378.5	-375
	150	-378.25	-384.25	-375.75
	152	-378.5	-377.25	-375
	154	-375.75	-380	-382.75
	156	-380	-378	-379.75
	158	-372	-377.75	-379.75
	160	-382.25	-380.75	-381.25
	162	-384.5	-381	-381.75
	164	-382	-381.75	-378
	166	-378.5	-377.25	-377.25
	168	-377	-376	-376.75
	170	-377.75	-372.5	-378.5
	172	-376.75	-382.5	-371
	174	-376.75	-382	-379.5
	176	-375.75	-380	-378
	178	-375.5	-379.25	-376.25
	180	-376	-384	-379.25
	182	-380.5	-382.25	-376.25
	184	-375.5	-377.5	-383.5
	186	-380	-378.75	-375.25
	188	-378.75	-381	-376.5
	190	-378.5	-379	-380.25
	192	-383	-379.5	-377.5
	194	-376.25	-382	-385
	196	-379	-379.25	-378.25
	198	-376	-379.5	-377
	200	-370.5	-384.5	-379.25
	202	-381.75	-380.25	-381
	204	-377	-383.5	-378.5
	206	-382.75	-376.5	-373.25
	208	-380.25	-376.25	-374.25
	210	-379.75	-380.5	-378.25
	212	-377.5	-378.75	-377.25
	214	-379.75	-379	-378.5
	216	-379	-378.75	-376.5
	218	-372.5	-385.5	-375.5
	220	-377.5	-383	-377.75
	222	-379	-380.75	-378
	224	-380.75	-381	-377.5
	226	-382.5	-383	-374.75
	228	-375.25	-379	-380.75
	230	-382.25	-378	-378.75
	232	-384.75	-381	-374.75
	234	-375	-381.75	-377.5
	236	-378	-378.5	-376.5
	238	-377.25	-380.75	-372.25
	240	-379.75	-382.75	-380.5
	242	-378.5	-383.75	-382
	244	-378.25	-383.5	-379
	246	-382.75	-382.25	-376.5
	248	-382	-381.25	-375.5
	250	-378.75	-380.75	-380.25
	252	-375	-375	-374
	254	-380.75	-377.75	-379.25
	256	-376.25	-379.25	-380
	258	-376.25	-376.25	-376.75
	260	-378.75	-378.75	-376
	262	-379.25	-388	-377
	264	-377	-379.25	-379.5
	266	-377	-379.25	-378
	268	-380.75	-382	-381.5
	270	-376	-382.75	-377
	272	-380.5	-377.75	-382.5
	274	-376.5	-380.75	-375.5
	276	-382.75	-376	-376.5
	278	-379.75	-381.25	-376
	280	-377	-382.75	-378.75
	282	-379.75	-378	-384
	284	-376.75	-376	-373
	286	-376.5	-373.25	-380.75
	288	-375.5	-380	-372
	290	-378	-375.75	-379.5
	292	-377	-380.75	-378.75
	294	-381	-378.5	-380.75
	296	-377.5	-378	-378.75
	298	-379.5	-381	-370
	300	-380.5	-380.5	-376.25
	302	-376.75	-378	-376.5
	304	-373	-381.5	-380.25
	306	-377.25	-376.25	-379.75
	308	-382	-378.75	-376.5
	310	-380.75	-384.5	-379
	312	-373.25	-382	-382.75
	314	-377.5	-383	-379
	316	-378.5	-377.5	-376.5
	318	-378.75	-379.25	-378.75
	320	-378.75	-379	-375.5
	322	-379.25	-381	-377
	324	-379.25	-385.25	-375.25
	326	-376	-383.25	-374.5
	328	-379.25	-386.5	-385
	330	-378.25	-379.75	-381
	332	-377.25	-388.5	-374
	334	-378.75	-381	-376.25
	336	-378	-374.75	-372
	338	-380.5	-382.25	-378
	340	-375	-380.25	-383.75
	342	-378	-384.25	-374.75
	344	-375	-385	-382.5
	346	-379	-383	-378.75
	348	-376.75	-382.5	-382.5
	350	-377.25	-382.25	-375.75
	352	-377.25	-381	-379
	354	-375	-379.75	-378.5
	356	-373	-376.75	-375.25
	358	-375	-380	-382
	360	-384.25	-387	-380
	362	-379.25	-384.25	-380.5
	364	-382.75	-382	-378.5
	366	-378.75	-382.5	-376.75
	368	-380.5	-378	-377.75
	370	-380	-380	-378.75
	372	-376.25	-379.5	-375.25
	374	-377.5	-380.75	-381.75
	376	-379.5	-379.25	-382
	378	-383.75	-385.25	-378
	380	-379	-382	-376
	382	-381	-379	-379
	384	-379.5	-381	-377.5
	386	-385.5	-375.5	-377.75
	388	-377	-378.5	-379.75
	390	-377.25	-379	-370.5
	392	-376.75	-380.75	-381
	394	-379.75	-378	-381.25
	396	-379.5	-382.25	-378.5
	398	-383.5	-380.75	-377.5
	400	-379.25	-380.5	-374.25
	402	-377.25	-378.75	-376.25
	404	-382.25	-377.75	-379.75
	406	-374	-377	-378.75
	408	-383.25	-381	-378.5
	410	-377	-379.5	-379
	412	-376.5	-386.25	-373.25
	414	-378.75	-383.25	-378.25
	416	-376	-385	-376
	418	-382.25	-377.5	-371.75
	420	-382.25	-378.5	-377
	422	-382.75	-381	-376
	424	-379.75	-378	-374
	426	-379.25	-380	-377.75
	428	-374.75	-378.25	-381
	430	-379	-376.5	-372.5
	432	-386.5	-381	-378.25
	434	-381	-382.25	-379.25
	436	-379.25	-381.25	-378.25
	438	-378	-376.5	-385.5
	440	-380.75	-376	-377
	442	-381.25	-379	-379.25
	444	-384.75	-383.25	-376
	446	-381.5	-378	-381.25
	448	-377	-379.25	-379.25
	450	-375	-378.25	-374
	452	-377.25	-378.5	-374.5
	454	-375	-377.5	-376.75
	456	-376.75	-373.5	-374
	458	-380.5	-381.25	-378.75
	460	-375.5	-382.5	-376.25
	462	-379	-378.5	-378.75
	464	-376.25	-379.75	-378.25
	466	-375.5	-380.75	-378
	468	-379.75	-380.25	-372
	470	-378.5	-384	-374
	472	-375.5	-375.75	-381.25
	474	-377.75	-380.75	-378.5
	476	-374.75	-382.75	-378.5
	478	-379.5	-380	-383.75
	480	-379.25	-382.5	-382.5
	482	-374	-378.5	-377.5
	484	-377.75	-379.5	-379.5
	486	-370.5	-379	-376.25
	488	-376.75	-377	-382.25
	490	-375	-380.75	-375.25
	492	-377.5	-380.25	-379
	494	-382.25	-379.25	-380
	496	-379.75	-374.25	-377.25
	498	-378.25	-379.5	-377
	500	-379.25	-380	-376.25
	502	-376.25	-374.75	-375.75
	504	-378.5	-375.5	-382
	506	-373	-385	-380.75
	508	-377.5	-382	-380
	510	-382.75	-376.5	-381
	512	-377.5	-378.75	-381.25
	514	-382.75	-380.5	-378
	516	-380.75	-377.25	-378.25
	518	-375.5	-377	-375.5
	520	-383.5	-375.5	-376.25
	522	-379	-377.5	-379.75
	524	-381.5	-382.5	-381.75
	526	-377.75	-376.25	-381.5
	528	-381	-376.5	-376.75
	530	-381	-381	-376.75
	532	-382.75	-377.5	-379.5
	534	-380.25	-377.75	-379.75
	536	-378.75	-381.25	-380.5
	538	-376.5	-383	-377.25
	540	-374.75	-379.25	-375.25
	542	-375.75	-381.5	-382.75
	544	-376.5	-384.25	-379
	546	-374.25	-384.25	-376.75
	548	-377.5	-378.25	-378.75
	550	-378.25	-379.25	-377.75
	552	-383.25	-382.25	-375.25
	554	-379.75	-381.25	-379.5
	556	-382.25	-380.5	-373.75
	558	-379.75	-379.25	-374
	560	-381.5	-378.5	-378.5
	562	-376	-386.25	-380.25
	564	-384	-381	-373.75
	566	-387	-378.75	-384.25
	568	-380	-378.25	-376.25
	570	-382.5	-377.75	-380
	572	-376	-383.25	-384
	574	-380.25	-377.25	-376.5
	576	-379	-381.25	-377
	578	-377	-377.25	-381.5
	580	-378.25	-378.25	-381.75
	582	-381.25	-383.5	-379
	584	-378.75	-381	-377
	586	-380.25	-379	-377.25
	588	-378.25	-381.5	-379
	590	-377.25	-381	-381.5
	592	-378	-377.5	-379.75
	594	-374	-378.75	-382
	596	-380.75	-376.5	-378.75
	598	-372	-371.5	-377.25
	600	-379.25	-381.75	-375.75
	602	-379.25	-380.5	-377.25
	604	-377	-377.25	-375
	606	-376.25	-375.25	-380
	608	-380.75	-382.75	-376.75
	610	-384.5	-374.25	-375.5
	612	-383	-382.25	-384.5
	614	-385.5	-381.75	-384.25
	616	-379	-379.75	-378.5
	618	-378.25	-380.25	-377.75
	620	-378.25	-379.75	-381.5
	622	-378	-382.5	-378.25
	624	-379.25	-379	-379.5
	626	-379.5	-379.75	-378.5
	628	-377.75	-384	-379.75
	630	-379.5	-379.75	-378.5
	632	-380	-380.25	-377.25
	634	-378	-378.25	-378.25
	636	-376.75	-386.25	-377.25
	638	-380.75	-380.75	-377.5
	640	-383	-378.25	-381.25
	642	-374	-379.25	-377
	644	-376.5	-381.25	-381
	646	-376.25	-381	-381.5
	648	-375.75	-375.75	-376
	650	-378.5	-378.5	-377.5
	652	-377	-381	-375.75
	654	-377.5	-381.75	-374.75
	656	-381.75	-377.25	-373.5
	658	-378.5	-377	-378
	660	-376	-383	-382.25
	662	-383.25	-378.5	-375.25
	664	-377.75	-378.5	-379.75
	666	-372	-383.25	-378.75
	668	-379	-375.5	-377.75
	670	-380.25	-381	-376.25
	672	-378.75	-379.75	-381
	674	-376	-374	-381
	676	-380.75	-379.5	-380.75
	678	-374.5	-379	-377.75
	680	-381.25	-380.25	-378
	682	-378.5	-375.5	-374.75
	684	-380	-380	-380.75
	686	-375.5	-375.25	-377
	688	-371	-372.75	-383
	690	-375.75	-379	-378.75
	692	-377	-375.75	-373.25
	694	-378.5	-376.5	-376.75
	696	-378.25	-383.25	-379.25
	698	-380.5	-387.25	-375
	700	-375.25	-379	-378.25
	702	-373.75	-374.25	-383
	704	-381.75	-384	-372.75
	706	-374.5	-382.75	-380
	708	-378.25	-374	-381
	710	-374	-380.25	-380
	712	-380.5	-375.25	-377.5
	714	-378.25	-384.5	-379
	716	-380	-383.25	-378.75
	718	-375.75	-374.5	-376.75
	720	-377.75	-379.5	-377.5
	722	-376.75	-373.75	-380.5
	724	-373	-375	-377.5
	726	-380.5	-377.5	-372.5
	728	-384.5	-380	-374.5
	730	-377.5	-375	-379
	732	-378.75	-375.75	-379.75
	734	-374.5	-377	-375
	736	-378.75	-379.25	-377.25
	738	-377.75	-374.75	-377.25
	740	-376.5	-379.75	-381.5
	742	-378.25	-377.75	-380.5
	744	-377.25	-380.5	-375.75
	746	-376.5	-380	-380.5
	748	-378.75	-375.75	-383
	750	-377.75	-381.25	-377.75
	752	-375.25	-374	-377
	754	-377	-377.75	-376.5
	756	-378.5	-378.75	-371.5
	758	-373.25	-380.25	-378
	760	-379	-380.25	-376.75
	762	-379	-377	-378.75
	764	-376.25	-378.5	-382.75
	766	-377.75	-379	-383
	768	-372.75	-378	-377.5
	770	-375.25	-374.5	-377.75
	772	-380	-379.25	-376.25
	774	-372.75	-382.5	-378.25
	776	-379.75	-377.75	-381.75
	778	-378.25	-376.75	-382.5
	780	-375	-377.75	-379.25
	782	-376.5	-376.75	-377
	784	-381	-376.75	-380.5
	786	-380	-377	-379.25
	788	-377	-376	-377.25
	790	-376.75	-380	-375
	792	-375.25	-377.5	-377.75
	794	-377.25	-380.75	-379.25
	796	-377.25	-380.25	-375.75
	798	-370.25	-377.75	-374.5
	800	-378.5	-378.25	-378.5
	802	-380	-381.25	-380
	804	-375.5	-376.5	-378
	806	-381.5	-379.25	-376
	808	-377.25	-377.5	-380
	810	-379.5	-378	-375
	812	-373	-382.5	-380.75
	814	-375	-379.75	-376.75
	816	-377	-373.75	-380.75
	818	-378	-381	-376.5
	820	-375.5	-380	-375
	822	-378.75	-384.75	-376.75
	824	-376	-381.5	-379.75
	826	-375.25	-380	-375
	828	-379	-377.25	-376.75
	830	-370.5	-382.25	-378
	832	-375.75	-380	-375.25
	834	-377	-377	-380.25
	836	-373.25	-377.5	-379
	838	-371.25	-380.5	-378.75
	840	-377.5	-377	-377.75
	842	-377.75	-377.5	-375.5
	844	-378	-388	-379
	846	-379	-379.25	-377.5
	848	-378.25	-381.25	-380.25
	850	-380	-382	-381.25
	852	-378.75	-374.25	-381
	854	-377.75	-380	-379
	856	-378	-378.75	-372
	858	-377.75	-382.5	-377
	860	-375.5	-382	-381.5
	862	-379	-375.75	-382.75
	864	-376.75	-380.5	-379.75
	866	-375.5	-374.5	-377.25
	868	-375.75	-374.75	-377.25
	870	-375.5	-379.75	-375.5
	872	-378.75	-380	-373.75
	874	-376.25	-380.75	-370.5
	876	-376.25	-376.5	-379.25
	878	-383.5	-384.75	-381.25
	880	-379.5	-379.5	-377.25
	882	-377.75	-378.5	-372.75
	884	-375.75	-378.25	-377
	886	-374.25	-383.25	-381.5
	888	-376	-375	-378.75
	890	-380.5	-378	-382.75
	892	-375.5	-383.75	-379.25
	894	-375.75	-382.25	-375.75
	896	-376.5	-379.25	-377.75
	898	-374.25	-381.25	-378.5
	900	-383.25	-377	-373.75
	902	-379.5	-382.25	-376.5
	904	-378.5	-383.75	-378.5
	906	-382.25	-376	-379
	908	-383.5	-377.25	-381
	910	-371.25	-378.5	-377.25
	912	-375.5	-380.75	-383.5
	914	-383.5	-375.75	-377.5
	916	-381.25	-381	-377.75
	918	-387.25	-381.75	-381
	920	-376.25	-382.75	-374.75
	922	-375.75	-385.5	-378
	924	-378.5	-378	-375.5
	926	-376.25	-376	-374.75
	928	-378.25	-371	-373
	930	-372	-369.5	-375.25
	932	-373.5	-367.75	-374
	934	-368	-368.75	-367
	936	-362	-368	-368.5
	938	-367.75	-378.5	-367
	940	-364.25	-385	-376.5
	942	-374.25	-380.5	-376.75
	944	-378.25	-381.25	-382.5
	946	-379	-383.25	-380.75
	948	-378.75	-377	-375.75
	950	-375.75	-371.75	-376.25
	952	-376.5	-377	-375.75
	954	-374	-375.75	-374.5
	956	-376	-377.75	-375.75
	958	-374.75	-381.5	-380.75
	960	-374	-383.75	-374.5
	962	-375.25	-377	-380.25
	964	-371.25	-378.25	-383.5
	966	-380.25	-377.25	-373.5
	968	-375.75	-379.25	-377
	970	-376.75	-384	-376.5
	972	-375.75	-379.5	-380
	974	-375.5	-378	-377.25
	976	-377	-376.25	-385
	978	-379.5	-383.5	-378
	980	-376.75	-377	-381.25
	982	-377.25	-376.75	-379
	984	-375	-380	-376.25
	986	-380.75	-382.5	-376
	988	-376.5	-380	-377.5
	990	-376.5	-380	-375.25
	992	-373.75	-378.25	-376
	994	-370.5	-380.25	-376.75
	996	-376.75	-378	-375
	998	-379.25	-381.5	-380.75
	1000	-378.75	-378.25	-375.5
	1002	-374.25	-379.25	-377.25
	1004	-375.5	-384.75	-378.5
	1006	-376.5	-379.25	-381.5
	1008	-374.5	-385.25	-378
	1010	-374.5	-387.75	-376.5
	1012	-378.5	-376.75	-373.75
	1014	-375	-380.75	-375.5
	1016	-378	-380.5	-378.25
	1018	-376.5	-375	-385.75
	1020	-379.25	-379	-376.25
	1022	-374	-380.5	-381
	1024	-374.5	-378.25	-374.75
	1026	-374.5	-380	-380.75
	1028	-379.75	-382.5	-378.25
	1030	-379.25	-383.25	-377.5
	1032	-380.5	-378.75	-378
	1034	-379	-375.75	-376.25
	1036	-383	-380.25	-378.5
	1038	-375.75	-382.25	-379.25
	1040	-371.5	-382.75	-380.25
	1042	-376.75	-382.5	-375.5
	1044	-372.5	-378.25	-384.25
	1046	-377	-377	-378.5
	1048	-374.5	-375.25	-372.5
	1050	-376.75	-381.25	-374.5
	1052	-377.5	-374.75	-380.5
	1054	-376.75	-382.75	-378.25
	1056	-376.75	-378.5	-376.75
	1058	-378.25	-379.25	-379.25
	1060	-374.75	-374.75	-381.5
	1062	-381	-378.5	-378
	1064	-375.5	-373.25	-382
	1066	-373.5	-377.25	-378.75
	1068	-381	-381.25	-377.5
	1070	-382.25	-380.75	-384.75
	1072	-378	-382.5	-376.75
	1074	-380.75	-384	-378.25
	1076	-374.5	-381.5	-379.25
	1078	-379.25	-384	-378
	1080	-377.5	-376.75	-378.5
	1082	-378.5	-380.25	-378.5
	1084	-376.75	-376.5	-375
	1086	-372.25	-379.5	-374.75
	1088	-372.25	-376.25	-378.5
	1090	-374.5	-381.5	-382.25
	1092	-377.25	-382.75	-379
	1094	-377	-382.75	-377.5
	1096	-374.25	-379.25	-385.75
	1098	-372	-384.5	-376.75
	1100	-377	-379.25	-379.25
	1102	-375	-382.75	-381.25
	1104	-373.5	-381.5	-381.75
	1106	-375.75	-381.5	-378.5
	1108	-377.5	-377.75	-383.75
	1110	-378.75	-383.5	-378.25
	1112	-379	-379	-383.5
	1114	-371	-378.5	-375.75
	1116	-373.75	-380.75	-382.5
	1118	-381	-379.5	-376
	1120	-378.25	-378.5	-375.75
	1122	-375.75	-383	-382.5
	1124	-375.5	-383.75	-375.75
	1126	-378.5	-376.75	-378.5
	1128	-377	-379.25	-374
	1130	-378.75	-379.25	-382
	1132	-379	-383	-376
	1134	-377.75	-375.5	-376.5
	1136	-378	-376.75	-379
	1138	-376	-378.75	-378.25
	1140	-376	-378.25	-378.25
	1142	-378.5	-378.5	-376.25
	1144	-379.25	-379.25	-380
	1146	-376.75	-381.5	-380
	1148	-375.25	-380	-378.5
	1150	-371.75	-381	-382.5
	1152	-376.25	-379.75	-380.5
	1154	-377.75	-383.5	-379.75
	1156	-378.25	-380.5	-373.5
	1158	-383	-381.5	-377.5
	1160	-374.5	-378	-380
	1162	-375.5	-382.25	-373.75
	1164	-386.25	-383	-378.75
	1166	-374.75	-382.75	-382.75
	1168	-380.5	-378.75	-379.5
	1170	-381	-378.5	-378.5
	1172	-383.5	-379.5	-374.75
	1174	-377.75	-377.75	-378.5
	1176	-378.25	-381	-374
	1178	-375.25	-382	-378.25
	1180	-380.75	-383.75	-381.5
	1182	-378	-381.5	-374.75
	1184	-377.75	-378	-376.75
	1186	-373	-375.5	-373.25
	1188	-373	-384.25	-383
	1190	-378.25	-372.25	-380.25
	1192	-376.25	-387.25	-381.5
	1194	-375	-379.75	-377.5
	1196	-378.25	-378.5	-383
	1198	-381.5	-383.25	-380
	1200	-379.5	-376.5	-382
	1202	-381.25	-380	-383.5
	1204	-381.5	-383.5	-379
	1206	-377	-384.75	-377.25
	1208	-378	-384.75	-378
	1210	-375	-379.25	-377
	1212	-376.5	-377.5	-375.75
	1214	-376.75	-381.25	-377
	1216	-375.25	-383.5	-380.75
	1218	-383	-381	-380
	1220	-377.25	-385	-379.75
	1222	-372.75	-377.75	-377.75
	1224	-376.75	-384.25	-379.5
	1226	-376.75	-380.25	-385.25
	1228	-377	-384.5	-381.5
	1230	-380.5	-384.75	-378.25
	1232	-381	-379.25	-382
	1234	-378.75	-383.5	-381.75
	1236	-374.5	-377.75	-374.5
	1238	-381.25	-374.75	-381.5
	1240	-374	-382.25	-379
	1242	-381.75	-380.75	-381.5
	1244	-377.25	-383.5	-381.75
	1246	-374.75	-381.25	-383.75
	1248	-372.75	-384.25	-378.5
	1250	-375	-377.5	-377.75
	1252	-379.25	-378.75	-374.25
	1254	-378.5	-382.5	-376.5
	1256	-376.25	-379.25	-382
	1258	-374.5	-382.5	-383
	1260	-377.25	-384.25	-382
	1262	-377.5	-380.25	-383.75
	1264	-382.25	-372.5	-384.75
	1266	-383	-375.75	-389.5
	1268	-374.5	-380	-382
	1270	-376.25	-380.75	-383.75
	1272	-377.25	-382.5	-388.25
	1274	-379	-385.5	-382.25
	1276	-381	-382	-388.75
	1278	-377.5	-379.5	-386.25
	1280	-380.25	-378.75	-387.25
	1282	-376.75	-382	-387
	1284	-378.75	-387.25	-384.75
	1286	-379.5	-377.25	-385.25
	1288	-374.75	-375.5	-388.25
	1290	-381	-379.75	-386
	1292	-377	-385.5	-388
	1294	-382.25	-381.25	-386
	1296	-372.5	-386.25	-382.75
	1298	-379.5	-385.25	-381.75
	1300	-377.75	-382.75	-379.5
	1302	-372.25	-380.25	-380.25
	1304	-379	-382	-382
	1306	-376.25	-392	-380.25
	1308	-375.5	-390.75	-378.25
	1310	-381	-392.25	-383.75
	1312	-380.75	-392.75	-383
	1314	-374.5	-392.5	-382
	1316	-385.75	-390	-380.25
	1318	-380.5	-395.25	-384
	1320	-376.5	-395	-377
	1322	-378.5	-399.25	-378
	1324	-374.5	-393.5	-378
	1326	-373	-393.5	-380.25
	1328	-377	-397.75	-380.25
	1330	-378.25	-399.5	-375.5
	1332	-375.5	-390.75	-377.75
	1334	-376.5	-393.25	-382.5
	1336	-377	-392	-376.25
	1338	-375.25	-390	-381.25
	1340	-378.25	-389.5	-377.25
	1342	-372.25	-388.75	-383.25
	1344	-380.25	-389.75	-378.75
	1346	-381.25	-388.25	-377.5
	1348	-374	-390.5	-379.75
	1350	-376.5	-388.25	-377.5
	1352	-375.75	-382.75	-382
	1354	-375.75	-381.75	-378.25
	1356	-377	-380	-374.5
	1358	-377.75	-373.75	-375.75
	1360	-376.25	-374.75	-382.25
	1362	-378	-377.75	-373.5
	1364	-379.25	-380.75	-377.25
	1366	-379	-378.25	-383.5
	1368	-381	-374.5	-382
	1370	-382.75	-374.75	-378.75
	1372	-376.25	-378.75	-380
	1374	-378.75	-371	-378.75
	1376	-384.75	-370	-379.5
	1378	-380	-380.25	-377.25
	1380	-386.5	-372.5	-384.5
	1382	-379.25	-373.5	-382
	1384	-379.25	-376.5	-378.75
	1386	-378.5	-374	-378.25
	1388	-380.25	-379.5	-378.5
	1390	-379.5	-371.25	-375.75
	1392	-386.5	-375.25	-377.5
	1394	-382.75	-381.25	-381.75
	1396	-387.75	-374	-377.25
	1398	-388	-374.75	-378.25
	1400	-385.75	-373.5	-379.5
	1402	-384.75	-377.5	-378.5
	1404	-391.25	-374.5	-379
	1406	-386	-370	-381.25
	1408	-387.5	-374.5	-377
	1410	-385.5	-374.25	-368.25
	1412	-387	-376	-379.25
	1414	-391	-375.25	-376
	1416	-388.25	-375.25	-379.75
	1418	-388	-372	-377
	1420	-390	-374.5	-374.25
	1422	-388	-375.25	-378
	1424	-389.75	-373	-382.25
	1426	-398.25	-374.25	-382.5
	1428	-395.25	-376.25	-379
	1430	-393.25	-374.75	-374.75
	1432	-392	-373.75	-378.25
	1434	-391	-375.5	-383
	1436	-394	-369	-377.5
	1438	-392.75	-369.75	-383.5
	1440	-382.25	-376	-378.75
	1442	-393.5	-380.75	-382
	1444	-393.75	-378.25	-382
	1446	-397	-373.25	-381.75
	1448	-397	-374.25	-382
	1450	-390	-377.5	-379.75
	1452	-391.5	-372.5	-377.75
	1454	-394.75	-376.25	-376.75
	1456	-390.5	-376.75	-379.5
	1458	-397.25	-372.5	-378.75
	1460	-393	-373.5	-376.5
	1462	-392.5	-376	-380.75
	1464	-393.75	-369.75	-382.5
	1466	-399	-374.5	-373.5
	1468	-397	-378.75	-380
	1470	-393.5	-373.5	-377.5
	1472	-396.5	-378	-378
	1474	-398.5	-377.5	-380.75
	1476	-395.75	-378.75	-379.75
	1478	-396.75	-382.5	-381.75
	1480	-399.5	-377.25	-378
	1482	-398.25	-376.75	-377.75
	1484	-393.5	-376.25	-378.75
	1486	-399.5	-376.5	-377.25
	1488	-391.5	-369.5	-375.75
	1490	-392.5	-378.75	-380.5
	1492	-391	-372.5	-377
	1494	-397.25	-378.25	-379.5
	1496	-398.5	-373	-376.75
	1498	-397.25	-373.75	-379.5
	1500	-394.25	-375	-380.25
	1502	-392.75	-375.75	-378
	1504	-397.75	-372.75	-379.75
	1506	-393.75	-375.25	-379
	1508	-394.25	-379.25	-374.75
	1510	-389.75	-375	-379.75
	1512	-392.75	-378.5	-379.25
	1514	-392.5	-377.75	-372.25
	1516	-393.5	-370	-376.25
	1518	-394.25	-374.5	-371.25
	1520	-394	-375.75	-372.75
	1522	-392	-377.25	-377
	1524	-393.25	-369	-380
	1526	-399.5	-378.5	-375
	1528	-394	-374.75	-374.5
	1530	-395.75	-377.75	-378.75
	1532	-398	-374.75	-371.75
	1534	-392.25	-378	-371
	1536	-392	-374.25	-383.5
	1538	-388	-378.25	-375.75
	1540	-391.5	-377.5	-376.5
	1542	-391.75	-376.25	-379
	1544	-394	-377.25	-377
	1546	-399	-381.5	-379.25
	1548	-396.75	-374.5	-375.25
	1550	-391.5	-373.75	-375
	1552	-393.25	-375	-373
	1554	-395.25	-371.75	-377.5
	1556	-391.25	-377.5	-377.5
	1558	-387.75	-378.25	-379.5
	1560	-393.5	-377.75	-378
	1562	-392.75	-374	-377
	1564	-393.25	-376.75	-382.5
	1566	-388.5	-376.5	-378.75
	1568	-386.5	-375.5	-381
	1570	-392.75	-376.5	-376.25
	1572	-390.5	-373.75	-379
	1574	-389.75	-374	-378.75
	1576	-390.25	-379.75	-375.25
	1578	-390.5	-379.25	-379
	1580	-389.5	-376.25	-382
	1582	-388.5	-377.75	-379.25
	1584	-389	-375	-374.75
	1586	-387.25	-372.75	-374.25
	1588	-388.25	-375.25	-378.75
	1590	-390.75	-379.75	-377.5
	1592	-389.25	-378	-379.75
	1594	-395.5	-375	-377
	1596	-388.25	-377.25	-375
	1598	-390.5	-376	-372.75
	1600	-391	-375.75	-371
	1602	-393.25	-374.5	-381
	1604	-390	-375.75	-369.25
	1606	-393	-371.75	-374.5
	1608	-386.5	-372.25	-374.75
	1610	-391.75	-380.75	-375
	1612	-390.5	-372.25	-371
	1614	-387.25	-377.75	-374.75
	1616	-395.5	-376.5	-377
	1618	-386.75	-377.25	-375
	1620	-389	-375.25	-377
	1622	-382.5	-374	-368
	1624	-392	-379.75	-375
	1626	-394.5	-380.5	-373
	1628	-391	-377.5	-377.25
	1630	-387	-369.25	-376.75
	1632	-390	-374.25	-373
	1634	-391.75	-375.75	-378
	1636	-387	-376	-376.25
	1638	-388	-377.25	-374.75
	1640	-386.75	-378.5	-374.75
	1642	-385.5	-377.25	-381.25
	1644	-392	-378.25	-380
	1646	-386.5	-378.75	-376.5
	1648	-393.5	-376.25	-374.75
	1650	-385.5	-376.25	-372
	1652	-386.25	-374.75	-372.25
	1654	-386	-374.25	-375
	1656	-387.5	-377.25	-376.75
	1658	-391.25	-371	-380
	1660	-391.5	-380.25	-379
	1662	-382.5	-376	-376
	1664	-389.5	-373.75	-380
	1666	-389.25	-374.25	-379
	1668	-384.75	-373	-376.5
	1670	-389.75	-374.75	-379.5
	1672	-388.5	-381.75	-376.25
	1674	-391.25	-373.25	-377.25
	1676	-390	-383.5	-374.25
	1678	-382.75	-377.5	-387.5
	1680	-387.25	-380.75	-380
	1682	-385.25	-376.5	-372.75
	1684	-389.75	-381.75	-376
	1686	-381.5	-373.25	-374.75
	1688	-385.75	-372	-376.75
	1690	-382.75	-375.5	-376
	1692	-389	-377.5	-374.25
	1694	-383.25	-382.25	-377.5
	1696	-387.25	-375.75	-376
	1698	-385.25	-376	-375.5
	1700	-386.25	-381.25	-373.75
	1702	-386.5	-374.75	-375.25
	1704	-387.25	-382	-374.75
	1706	-383	-375.5	-375.25
	1708	-383.5	-383	-378
	1710	-389.25	-379.25	-375.5
	1712	-385.75	-382.75	-375
	1714	-380.5	-377.25	-378.5
	1716	-382.5	-377	-382.25
	1718	-384.25	-379.75	-370
	1720	-386	-385	-374.25
	1722	-387.75	-377	-375.75
	1724	-386.5	-371	-375.5
	1726	-385.5	-381.25	-377.75
	1728	-389.25	-382.75	-376
	1730	-384.75	-376.75	-374.25
	1732	-388.25	-376.5	-381.5
	1734	-385.25	-379.5	-376.5
	1736	-387.5	-371.75	-379.5
	1738	-384.75	-384	-379.75
	1740	-388.75	-380	-380
	1742	-383	-374	-380.25
	1744	-385.5	-381	-380.5
	1746	-387.25	-374.5	-380
	1748	-383.75	-380.75	-378
	1750	-385.75	-380.25	-376.75
	1752	-384	-375.25	-375.5
	1754	-387.5	-370.75	-377.25
	1756	-385.5	-372.25	-379.25
	1758	-385.5	-375	-373.5
	1760	-380.75	-376.5	-377.5
	1762	-379	-379.75	-382.5
	1764	-380	-373.5	-378
	1766	-385.25	-380	-379.5
	1768	-378	-379.25	-376.5
	1770	-375.25	-372.25	-374
	1772	-383.25	-377.5	-376.75
	1774	-384	-381.5	-379.25
	1776	-383.75	-377.25	-378
	1778	-383.25	-375	-378
	1780	-381.25	-378.5	-379
	1782	-381	-373.5	-377
	1784	-382	-377.75	-378.5
	1786	-380.5	-382.25	-383.5
	1788	-382	-374.75	-378.75
	1790	-381	-380.5	-374
	1792	-382	-373.75	-378.75
	1794	-382.75	-382.5	-376.75
	1796	-387.75	-381.5	-383.25
	1798	-374.25	-381.5	-378
	1800	-379.5	-379.5	-380.5
	1802	-380.75	-379.75	-374.75
	1804	-379.25	-383.5	-379
	1806	-382.75	-375.5	-380.75
	1808	-383	-378.75	-380.25
	1810	-380.75	-380.75	-378.75
	1812	-383.5	-383.25	-380
	1814	-382.5	-382.5	-380.25
	1816	-377	-375.25	-377
	1818	-382	-384	-384.25
	1820	-384.5	-378	-384.5
	1822	-382.5	-379.75	-382.25
	1824	-385.25	-376.25	-377.5
	1826	-381.75	-382	-385
	1828	-379.5	-386	-382.5
	1830	-379	-378.25	-383.25
	1832	-379.25	-380.25	-378.5
	1834	-382.25	-378.25	-378
	1836	-382.5	-382.75	-377.25
	1838	-377.5	-378.5	-378.5
	1840	-380.75	-382.25	-376.5
	1842	-382.25	-377.25	-381.25
	1844	-377.5	-377.25	-377
	1846	-377.75	-386.75	-381.75
	1848	-381	-384	-378.5
	1850	-377.25	-384.25	-378.25
	1852	-383.25	-382.25	-379.25
	1854	-379	-382	-380.5
	1856	-380.75	-384.25	-376.5
	1858	-378.75	-387.75	-380.5
	1860	-384.5	-384.5	-381.25
	1862	-376	-388	-380.25
	1864	-385.75	-386	-380.25
	1866	-375.75	-379	-382.5
	1868	-382.25	-386	-379.25
	1870	-384.25	-383.25	-382.75
	1872	-380.25	-388.25	-383.75
	1874	-382	-385.75	-380.75
	1876	-382.75	-383.25	-378
	1878	-377.75	-388	-382
	1880	-377.25	-387.25	-384.25
	1882	-378.5	-384.5	-380.75
	1884	-381.25	-387.25	-380
	1886	-378	-382.25	-385
	1888	-383.75	-385.75	-383.25
	1890	-383.25	-386.25	-384.5
	1892	-379.25	-386.25	-376
	1894	-380.75	-388.75	-380.75
	1896	-384.5	-392.25	-377
	1898	-380.5	-383	-381.75
	1900	-381	-386	-381.75
	1902	-385	-389	-382.25
	1904	-384	-388.75	-383.75
	1906	-381.25	-391.25	-383
	1908	-378.5	-387.75	-381.75
	1910	-383.5	-389.5	-385
	1912	-382.75	-388.5	-381.5
	1914	-385	-387.5	-384.5
	1916	-380	-388	-381.75
	1918	-382.5	-392.5	-385.25
	1920	-375.25	-386.75	-377.75
	1922	-384	-391	-381.75
	1924	-384.5	-390	-384.5
	1926	-380.25	-392.75	-378.5
	1928	-381	-389.5	-382.25
	1930	-383.25	-390	-387
	1932	-385.25	-389.5	-381.75
	1934	-389	-387.75	-383
	1936	-386.25	-387	-384.5
	1938	-382.5	-388.25	-381.5
	1940	-380.5	-389.25	-380.25
	1942	-379.75	-389	-381.5
	1944	-379.25	-391.75	-380.75
	1946	-380.25	-391	-382
	1948	-382	-385.25	-386.25
	1950	-384	-386.75	-381.75
	1952	-382.25	-385.25	-380.5
	1954	-382.75	-393.5	-381.75
	1956	-385.75	-390	-381.75
	1958	-386	-390.5	-384.25
	1960	-380	-390.5	-380.75
	1962	-389	-388	-387.5
	1964	-385	-389	-385.5
	1966	-384.25	-389.75	-385.75
	1968	-381.25	-391.5	-381.25
	1970	-385.5	-388.75	-382.25
	1972	-386.5	-391.75	-384
	1974	-386	-388.5	-381.25
	1976	-385.75	-381.75	-379
	1978	-384.5	-391.25	-381.5
	1980	-382.25	-387	-382.75
	1982	-385.5	-393.75	-383
	1984	-385.75	-385.75	-384.75
	1986	-385	-392.5	-382.5
	1988	-381.75	-391.25	-381
	1990	-383.5	-389	-381.75
	1992	-385.25	-383.25	-381.25
	1994	-383.25	-389	-385.5
	1996	-384.25	-387.5	-382.5
	1998	-385.25	-391	-378.25
	2000	-386.75	-390.5	-379.5
	2002	-387.75	-386.5	-381.75
	2004	-387.75	-390.75	-386.75
	2006	-383	-386.75	-379.25
	2008	-384	-389	-387
	2010	-383.75	-390	-385.5
	2012	-390	-390.25	-380.5
	2014	-389.25	-388.75	-381
	2016	-388.75	-390.75	-382
	2018	-384.25	-386.25	-387.75
	2020	-383.75	-386.75	-379.75
	2022	-384.5	-389.75	-378.75
	2024	-388.25	-385.25	-385.25
	2026	-387	-392.75	-386
	2028	-386.75	-388.25	-381.5
	2030	-388.5	-390.75	-376.5
	2032	-382.75	-390.25	-382.75
	2034	-391.25	-389.25	-382.5
	2036	-388.5	-389	-384
	2038	-391	-396.75	-383.5
	2040	-387.25	-392	-378
	2042	-394	-390.5	-384
	2044	-385.5	-394	-381.5
	2046	-383.5	-394.25	-383.25
	2048	-379.5	-389.5	-381.75
	2050	-388.25	-389.5	-380.75
	2052	-387	-386.25	-386.25
	2054	-388.5	-394	-382.5
	2056	-392.25	-391.5	-381.75
	2058	-389	-390.75	-381.75
	2060	-392.5	-390.5	-386
	2062	-386.75	-391.75	-383.25
	2064	-387.75	-385.75	-384
	2066	-382.5	-390.25	-382.5
	2068	-386.75	-389	-383.5
	2070	-392.25	-389.75	-379.75
	2072	-388	-394.75	-386.25
	2074	-390	-391.5	-379.25
	2076	-392.75	-391.25	-381.5
	2078	-388.75	-390	-378.5
	2080	-390.75	-386.5	-381.75
	2082	-385	-388.25	-379.5
	2084	-390.75	-388.75	-384.25
	2086	-390	-385.75	-382.25
	2088	-392	-388.25	-384.75
	2090	-388.5	-391.25	-385.5
	2092	-390.75	-391.25	-385.5
	2094	-386.5	-393.75	-381.75
	2096	-389.25	-384.75	-382
	2098	-398.25	-387.5	-384.25
	2100	-391.25	-390.75	-381.5
	2102	-389.25	-386.5	-384.75
	2104	-390.5	-393	-380
	2106	-388	-392.75	-382.25
	2108	-385	-393.5	-382.75
	2110	-390.75	-389.5	-384
	2112	-387.75	-393.5	-381.25
	2114	-390.5	-388	-385.5
	2116	-390.5	-394.75	-386.5
	2118	-394.75	-387.75	-379
	2120	-385.5	-387.5	-382.5
	2122	-391.75	-389.5	-382
	2124	-392.5	-392	-380.75
	2126	-388	-393.25	-384.5
	2128	-395	-392.25	-379.75
	2130	-387.25	-386.75	-379.25
	2132	-390.5	-388.25	-386.25
	2134	-393	-385.75	-383.75
	2136	-392.75	-390	-381.5
	2138	-394.5	-390.5	-382.25
	2140	-391.25	-390.25	-385.75
	2142	-393.25	-391.75	-379
	2144	-387.75	-392.25	-388
	2146	-390.75	-393.25	-387.5
	2148	-391.25	-390.75	-382.75
	2150	-390.5	-390.75	-379.75
	2152	-394.25	-387.5	-383.25
	2154	-390	-393.5	-388
	2156	-393.75	-387	-382.75
	2158	-391.25	-392	-381.25
	2160	-390	-387.25	-386
	2162	-390.5	-394	-384.25
	2164	-389.5	-391.25	-383
	2166	-396.25	-391	-379.75
	2168	-386.75	-391.25	-384.75
	2170	-393	-385	-384
	2172	-395.5	-393.25	-380.25
	2174	-393.5	-390.5	-381
	2176	-392.75	-388.25	-377.25
	2178	-390	-388.75	-381.75
	2180	-394.5	-391.25	-383.25
	2182	-394.75	-388	-375.75
	2184	-393.5	-384	-382.75
	2186	-396.25	-388.25	-379.5
	2188	-390.75	-391.25	-383.75
	2190	-399.5	-393	-386.5
	2192	-397.25	-391	-386.25
	2194	-401.5	-388.5	-386.5
	2196	-392	-389.5	-383
	2198	-390.5	-393.25	-380.75
	2200	-400.25	-391.25	-384.25
	2202	-389.75	-386.25	-383.5
	2204	-394.5	-385.5	-381.5
	2206	-392.75	-392.25	-381
	2208	-393.25	-393.5	-381.25
	2210	-397	-390.75	-385.75
	2212	-394	-393.25	-389
	2214	-397	-393	-382.5
	2216	-392	-392	-377
	2218	-397	-387.25	-383.25
	2220	-393.25	-383.5	-378.75
	2222	-395	-391.5	-382.5
	2224	-391.5	-389.5	-384
	2226	-399.25	-390.5	-385.25
	2228	-396.5	-391.5	-384.25
	2230	-392.75	-386	-390
	2232	-396.5	-387.75	-377.75
	2234	-396.25	-386.5	-385
	2236	-393	-384	-388.25
	2238	-394.75	-387.5	-383.25
	2240	-396.5	-383.75	-381.75
	2242	-393.75	-389.75	-382.75
	2244	-393.75	-389	-388.5
	2246	-393.5	-384.5	-381.5
	2248	-394.5	-390.5	-382.5
	2250	-392.25	-389	-382.75
	2252	-399.75	-387.5	-383.5
	2254	-394	-395	-385.75
	2256	-394.75	-388.75	-385.75
	2258	-391.5	-390.75	-380.5
	2260	-399.75	-390.25	-389
	2262	-395.75	-384.75	-381
	2264	-392.25	-389.75	-382.5
	2266	-391	-391.75	-388.5
	2268	-401.75	-390.5	-380
	2270	-401	-388.25	-382.25
	2272	-397.25	-389.5	-384.75
	2274	-395	-386.5	-385
	2276	-402.25	-384.25	-386.75
	2278	-399	-392	-380.25
	2280	-400	-389.25	-382
	2282	-396.25	-385.25	-384.25
	2284	-394.25	-387.25	-386
	2286	-397.75	-388.75	-383.25
	2288	-398.5	-388.5	-381.5
	2290	-398.25	-388	-381.25
	2292	-394	-388.75	-381.5
	2294	-395.5	-391.5	-382
	2296	-398	-389.5	-383.25
	2298	-396.25	-385.25	-384.75
	2300	-396.25	-390.25	-383
	2302	-401.25	-390	-380
	2304	-398.25	-387.5	-378
	2306	-399	-389	-385
	2308	-394.75	-386.25	-381.25
	2310	-402.25	-393.75	-386.5
	2312	-403	-391	-386.25
	2314	-395	-385.25	-384.25
	2316	-393.75	-392.25	-381.25
	2318	-408.75	-388.5	-376.5
	2320	-400.75	-389	-376.5
	2322	-396.5	-393.25	-382.25
	2324	-401	-390.5	-387.25
	2326	-405	-391	-383.75
	2328	-394.25	-385	-384.25
	2330	-395.25	-386.5	-384.75
	2332	-400	-392.25	-382.75
	2334	-400.25	-390	-390
	2336	-398.5	-389	-378.5
	2338	-398.75	-388.5	-386.25
	2340	-401.25	-390.75	-382
	2342	-398.75	-387.25	-384
	2344	-392.75	-393.5	-382.5
	2346	-399.25	-398.5	-378.75
	2348	-399.75	-389.25	-381.5
	2350	-398.75	-389.75	-382
	2352	-398.75	-387	-381.5
	2354	-399.25	-384.75	-380.25
	2356	-399.75	-388	-380.5
	2358	-406.25	-387	-387.25
	2360	-403.75	-388.5	-381.75
	2362	-401.75	-391.75	-384.25
	2364	-398.5	-386.75	-384.75
	2366	-399	-385	-383.5
	2368	-401.75	-386	-383
	2370	-398.75	-388.25	-381.25
	2372	-402.5	-387	-383.25
	2374	-398.25	-387.25	-381.5
	2376	-399	-386.25	-377.25
	2378	-404	-393.5	-383.5
	2380	-400	-389.5	-382
	2382	-399.25	-391.5	-380.25
	2384	-403	-389	-384.25
	2386	-402.25	-389	-383.25
	2388	-405.75	-389.25	-383.25
	2390	-398.75	-388.5	-379.75
	2392	-402.25	-390.25	-386
	2394	-404.75	-386.5	-382.25
	2396	-404.5	-387.25	-379
	2398	-394.5	-388.75	-380.5
	2400	-397.75	-390.5	-390.25
	2402	-403.5	-389.25	-382
	2404	-400.5	-393.25	-385.75
	2406	-401.25	-390.25	-385
	2408	-401.5	-389.75	-389.75
	2410	-403	-386.75	-381.5
	2412	-406	-386.5	-380.75
	2414	-406.75	-388.5	-383.75
	2416	-400.5	-388.5	-386.75
	2418	-407.25	-393.25	-383
	2420	-404	-390.75	-386.5
	2422	-402	-389.25	-382.5
	2424	-403.25	-391	-384.25
	2426	-404.75	-389	-383
	2428	-405.5	-394.25	-382.25
	2430	-399.5	-390.25	-388
	2432	-400	-393.75	-377.75
	2434	-398.75	-388.25	-382.75
	2436	-403.5	-391.75	-380.5
	2438	-400	-387.75	-385
	2440	-399.75	-387.5	-383.75
	2442	-399	-390.75	-384.25
	2444	-400	-387.5	-384
	2446	-398.5	-392.5	-388.25
	2448	-402	-387.25	-385.25
	2450	-401.25	-389.25	-385.5
	2452	-400	-387.75	-381.5
	2454	-401	-385.75	-385
	2456	-396.5	-385.25	-386.75
	2458	-403.5	-391.5	-384.25
	2460	-402.75	-385	-382.5
	2462	-404	-391.5	-385.5
	2464	-405.75	-387.25	-384.5
	2466	-399.5	-384.25	-385.5
	2468	-397.5	-390.25	-383.5
	2470	-403.75	-383.75	-378.5
	2472	-402	-388.5	-380
	2474	-401.25	-388.75	-377.75
	2476	-402	-388.5	-384.5
	2478	-405.25	-384.25	-379.5
	2480	-399.75	-388.5	-382.25
	2482	-407.25	-385.75	-381.5
	2484	-401	-381	-389.5
	2486	-406.5	-383.25	-379
	2488	-406.25	-385.5	-380.75
	2490	-404.5	-382.5	-385.75
	2492	-407	-385.75	-384.25
	2494	-400.5	-389.5	-381.25
	2496	-407	-386.75	-388.75
	2498	-404.25	-391.25	-379.5
	2500	-402.75	-393.5	-379.25
	2502	-405.75	-387.5	-380.5
	2504	-404.75	-389.5	-383
	2506	-400.5	-389.5	-380.25
	2508	-404	-389	-387.25
	2510	-403.25	-389.5	-383
	2512	-406	-388.75	-385
	2514	-403.25	-392.25	-386.5
	2516	-398.75	-386.5	-387.25
	2518	-399.5	-381.75	-380.25
	2520	-406.5	-384.75	-385
	2522	-403.75	-383.5	-381.5
	2524	-403.25	-394.5	-383.75
	2526	-405.25	-391.75	-385.25
	2528	-407.25	-392.25	-388.75
	2530	-405	-387	-387
	2532	-401.5	-387	-381
	2534	-405.5	-382	-386.75
	2536	-409.75	-381.25	-384.5
	2538	-400.75	-387.5	-386.5
	2540	-410.5	-390.5	-384.25
	2542	-403	-388.25	-386.75
	2544	-404.5	-382.5	-387.5
	2546	-406.75	-387.5	-384
	2548	-404	-388.25	-381.5
	2550	-402.5	-389.25	-382.5
	2552	-403.75	-384.75	-383
	2554	-406.25	-380.5	-381
	2556	-403.25	-384.25	-382.5
	2558	-407	-380.25	-384.5
	2560	-405.25	-392.5	-382
	2562	-405.75	-386	-383.25
	2564	-401	-388.75	-384
	2566	-409	-382	-383.5
	2568	-404.25	-385.5	-382.75
	2570	-407.5	-384.25	-381.75
	2572	-409.75	-384	-385.25
	2574	-401.75	-388.25	-379
	2576	-404.75	-391.75	-383.5
	2578	-400.5	-384.75	-382.5
	2580	-404.25	-386.5	-381
	2582	-410	-387	-377
	2584	-404.25	-385.75	-383.75
	2586	-403.5	-388.25	-383.75
	2588	-405.25	-384.75	-383.25
	2590	-403.25	-385.75	-388.75
	2592	-406.75	-385.25	-385
	2594	-404	-386.25	-385.5
	2596	-406.75	-386.75	-382.75
	2598	-409.75	-384.5	-384.75
	2600	-407.5	-388.25	-375
	2602	-407.25	-385.25	-381.75
	2604	-406.5	-383.75	-383.5
	2606	-403	-385	-379.25
	2608	-401.75	-385.25	-388
	2610	-404	-383.25	-390
	2612	-407.75	-386.75	-385.5
	2614	-404.25	-386.5	-384.25
	2616	-402.25	-386.75	-383.5
	2618	-403	-385.25	-384
	2620	-406.75	-386.5	-381.75
	2622	-406	-393	-384.75
	2624	-401.5	-383.25	-382
	2626	-405.75	-383.25	-388.25
	2628	-402.25	-393	-386.5
	2630	-400.75	-388.25	-385
	2632	-405.75	-387.75	-386.5
	2634	-406.25	-389.5	-384
	2636	-403	-387	-381.25
	2638	-405	-379.75	-384
	2640	-399.25	-385.5	-385
	2642	-412	-388	-379.25
	2644	-406.5	-390.25	-378.25
	2646	-406.5	-381.25	-385.75
	2648	-401.75	-386.5	-380
	2650	-405.25	-384.5	-378.25
	2652	-407.75	-386.25	-379.25
	2654	-405.5	-380.75	-380.25
	2656	-405.25	-381.75	-380.25
	2658	-404.5	-385.25	-388
	2660	-403.75	-383	-387.5
	2662	-409	-385.5	-386
	2664	-407.75	-384.75	-382.25
	2666	-411.5	-380.25	-379
	2668	-403.25	-388.5	-377.75
	2670	-405	-382.5	-386.75
	2672	-407.25	-385.25	-381
	2674	-404.75	-389	-382.25
	2676	-403	-386.25	-379
	2678	-404.25	-389	-383.5
	2680	-403	-389.25	-382.25
	2682	-405.5	-385.75	-382.5
	2684	-406	-386	-382
	2686	-408.75	-384.75	-381
	2688	-405	-386.25	-379.5
	2690	-404.75	-385	-379
	2692	-406.75	-381.75	-381.25
	2694	-404.25	-388	-383.75
	2696	-402.5	-385	-384.75
	2698	-411.25	-387	-378.5
	2700	-404.25	-381	-378.5
	2702	-409.75	-383.25	-379.75
	2704	-410.5	-383.75	-378.25
	2706	-409.25	-384.75	-385
	2708	-411	-388	-383
	2710	-408.25	-384.75	-386.5
	2712	-407.75	-388.75	-383.75
	2714	-413	-385.25	-381
	2716	-402	-385.25	-383.75
	2718	-407.5	-383.75	-384.25
	2720	-405.25	-389	-387.75
	2722	-408.25	-385.25	-378
	2724	-406.75	-384.75	-384.5
	2726	-409.25	-385.25	-380
	2728	-407.75	-385	-384.75
	2730	-405.75	-387	-385.75
	2732	-401.75	-382.75	-382.5
	2734	-410	-384.5	-379.25
	2736	-405.5	-383	-380
	2738	-407.5	-383.75	-384.75
	2740	-411.75	-388.25	-385.25
	2742	-402.75	-384.5	-383
	2744	-413.75	-389	-381
	2746	-407.5	-382	-385
	2748	-406.5	-380.75	-387.25
	2750	-405.75	-383.75	-383.25
	2752	-402.25	-379.75	-380.75
	2754	-405.5	-386	-379
	2756	-407.25	-387.25	-381
	2758	-410.75	-385.75	-384.5
	2760	-405.25	-385.5	-390
	2762	-402	-386.25	-382.75
	2764	-407.25	-386.5	-388
	2766	-411	-385.75	-385.5
	2768	-408.75	-386.5	-384
	2770	-413.5	-383.75	-382.5
	2772	-399.75	-379.25	-378.75
	2774	-405	-386.75	-383.25
	2776	-409.25	-385.75	-388.25
	2778	-408.75	-383.75	-379.5
	2780	-408.25	-388	-386.75
	2782	-406.25	-385	-384.75
	2784	-407.25	-384	-382.75
	2786	-407.75	-383.75	-381.75
	2788	-408.25	-382	-378.25
	2790	-409.5	-382.75	-379
	2792	-408	-389.25	-380.5
	2794	-407.75	-386.25	-377.5
	2796	-403	-386	-383.5
	2798	-403.75	-389	-379.75
	2800	-408.5	-384.75	-385
	2802	-407.5	-388	-382.25
	2804	-406.5	-381.25	-377
	2806	-403.75	-382	-386
	2808	-403	-380.5	-387.5
	2810	-407.25	-385	-383
	2812	-407.5	-388.5	-379
	2814	-405.5	-382.5	-379.75
	2816	-406	-381	-382
	2818	-406.75	-384	-380
	2820	-407.5	-385.5	-383
	2822	-398.5	-387.25	-380.5
	2824	-414	-386.25	-382.75
	2826	-409.5	-380.25	-382.75
	2828	-411	-384.5	-385
	2830	-408	-382.75	-380.75
	2832	-410.75	-390.75	-385.25
	2834	-407.5	-384.5	-382.75
	2836	-409.5	-389	-383
	2838	-405	-384	-381.25
	2840	-414.25	-382.25	-381.5
	2842	-408.75	-386.5	-385
	2844	-408.25	-381.5	-384.75
	2846	-412.5	-382.25	-384.5
	2848	-412.75	-380.5	-384.5
	2850	-409.25	-383	-384
	2852	-401.75	-383.75	-385.25
	2854	-410.25	-385.25	-380.5
	2856	-405.5	-387.25	-379
	2858	-404.75	-382.25	-381.75
	2860	-414.25	-384.25	-382
	2862	-411.75	-384.5	-388
	2864	-408.5	-381.25	-383.25
	2866	-406.25	-384.5	-380
	2868	-407.5	-386.5	-384.75
	2870	-408.75	-381.75	-384.5
	2872	-407	-383	-388.75
	2874	-410.5	-391.75	-384.5
	2876	-408.75	-385.75	-386
	2878	-411.75	-382	-384.5
	2880	-414.25	-383.5	-382.75
	2882	-403.25	-385.75	-384.25
	2884	-407.75	-386.75	-382.5
	2886	-411.25	-384.25	-385.25
	2888	-412.5	-384.25	-385.5
	2890	-409	-384.25	-387.5
	2892	-408.75	-384	-382.25
	2894	-414	-381.25	-382
	2896	-416.5	-384.5	-386.25
	2898	-406	-390	-384.25
	2900	-413.25	-385	-383.75
	2902	-411.75	-388	-383.25
	2904	-411.25	-378.75	-381.5
	2906	-408.5	-386.25	-381.25
	2908	-409.75	-377.25	-384
	2910	-410.75	-382.5	-382.75
	2912	-407.25	-379.75	-387
	2914	-406.25	-385.25	-381.5
	2916	-414.75	-384.5	-381.75
	2918	-410.75	-383.75	-386
	2920	-410.75	-383.25	-384.5
	2922	-411	-384.75	-380
	2924	-410.5	-384.75	-382.25
	2926	-412.25	-384.25	-387.25
	2928	-411.5	-384	-382.25
	2930	-407.25	-380.75	-381
	2932	-406.5	-385.25	-387.5
	2934	-406.5	-384.25	-384.25
	2936	-409.25	-382.75	-383.5
	2938	-414.5	-383	-385.75
	2940	-412.25	-381.25	-382.75
	2942	-409.5	-381.75	-383.25
	2944	-403.25	-386.5	-382
	2946	-408.5	-384	-382.75
	2948	-406	-381.25	-381.25
	2950	-409.25	-385.75	-381.5
	2952	-408.25	-391	-385.5
	2954	-410	-386.5	-380.25
	2956	-407.25	-389.25	-388.5
	2958	-408.5	-380.5	-383.5
	2960	-413.25	-383.75	-385
	2962	-411	-388.25	-385
	2964	-411	-381.75	-382.5
	2966	-411.5	-384	-383.25
	2968	-414.75	-388.5	-382
	2970	-410.75	-384.5	-380
	2972	-407.5	-384.75	-386.5
	2974	-411.25	-383.5	-383.75
	2976	-405.75	-381.25	-384.25
	2978	-408.5	-384.75	-382.5
	2980	-412.25	-381	-378.5
	2982	-409	-382.5	-383
	2984	-408	-382.25	-386.5
	2986	-410.5	-381.75	-387
	2988	-410.75	-387.25	-382.25
	2990	-406.5	-379.25	-386.75
	2992	-409	-380.75	-379.25
	2994	-409.25	-383.75	-378.25
	2996	-411.75	-383	-386
	2998	-413.25	-387.25	-383.75
	3000	-411	-380	-378.25
	3002	-411.5	-383.5	-378.75
	3004	-405.75	-386	-382.75
	3006	-408.75	-383.5	-384.25
	3008	-407	-381	-385
	3010	-410	-387.25	-384.25
	3012	-412.25	-385.25	-381.25
	3014	-410.5	-378.5	-383.25
	3016	-415.5	-383.75	-383.75
	3018	-407.25	-380.75	-384
	3020	-411.25	-384	-377.25
	3022	-410.75	-387	-381.75
	3024	-403.75	-381	-384.5
	3026	-409	-383.75	-380.75
	3028	-409.25	-384.5	-383.75
	3030	-410.25	-382.5	-381
	3032	-411.25	-382.25	-379
	3034	-410	-381.25	-374.5
	3036	-410.5	-377.5	-385.5
	3038	-408.75	-379.25	-388.75
	3040	-410.75	-385.5	-387
	3042	-414.75	-384.75	-380.75
	3044	-411.5	-382.25	-382.75
	3046	-410.25	-381.75	-389.5
	3048	-408.5	-383.25	-382.5
	3050	-410.5	-383	-385.5
	3052	-406.5	-380	-382.5
	3054	-414.25	-381	-383
	3056	-408.5	-381	-380.25
	3058	-412	-385.25	-383.5
	3060	-407.75	-380	-390.25
	3062	-413.25	-386.25	-383.75
	3064	-409.75	-377.75	-383.25
	3066	-411.25	-380.75	-383.75
	3068	-414.25	-390.75	-382
	3070	-410.75	-386.25	-385.75
	3072	-413.75	-386.75	-380.25
	3074	-411.25	-386.25	-383.75
	3076	-412.5	-384.5	-381.75
	3078	-411.75	-386.75	-392
	3080	-411.5	-383	-388.25
	3082	-414.25	-385.5	-386.5
	3084	-410.25	-384	-379.75
	3086	-411	-380	-384.25
	3088	-410.25	-386	-380.5
	3090	-410.75	-384	-382.5
	3092	-411.5	-382	-390
	3094	-414.5	-384.75	-387.5
	3096	-412.75	-384.25	-383.75
	3098	-412	-379.25	-386.25
	3100	-412.5	-380.75	-388
	3102	-411.25	-382	-384.75
	3104	-407.25	-380.25	-382.75
	3106	-407.25	-381	-381.25
	3108	-413	-382.25	-387.25
	3110	-415	-384	-384.5
	3112	-406.75	-384.25	-382.5
	3114	-411.25	-383	-383.25
	3116	-413.5	-381	-383
	3118	-411	-382.75	-384.5
	3120	-405.75	-379.5	-379.75
	3122	-411.25	-381	-384.25
	3124	-409.25	-380.5	-381.75
	3126	-410	-384.75	-382
	3128	-417.25	-383.25	-382.75
	3130	-420	-376	-380.25
	3132	-407	-381	-387.5
	3134	-413	-381.25	-388.75
	3136	-408.25	-381.75	-382.5
	3138	-412.75	-382.25	-383.5
	3140	-411.5	-383.5	-379.75
	3142	-410	-387	-383.75
	3144	-408.5	-384	-387
	3146	-409.75	-380.25	-388.25
	3148	-414.25	-384	-382
	3150	-414.25	-381.75	-385.25
	3152	-408	-383	-381.5
	3154	-412.25	-377.75	-385.25
	3156	-409.5	-381.5	-384.5
	3158	-405	-380	-387.5
	3160	-412.75	-383.5	-386.25
	3162	-410.5	-384.25	-388.5
	3164	-408.75	-377.5	-384.25
	3166	-411	-382.5	-386.75
	3168	-415.75	-380.5	-385
	3170	-411.75	-384.75	-378.25
	3172	-408.5	-387.25	-384
	3174	-411.75	-380	-387.25
	3176	-413.25	-385.75	-386.25
	3178	-409.75	-379.75	-386
	3180	-409.25	-382.25	-383
	3182	-417	-384	-385.25
	3184	-412.25	-378.75	-379
	3186	-414.25	-381.5	-382.25
	3188	-417.25	-381.75	-383.25
	3190	-411.75	-380.25	-381
	3192	-413.25	-379	-375.25
	3194	-408.25	-380.25	-383
	3196	-417.5	-383.5	-385.25
	3198	-411.5	-380	-382.5
	3200	-411.75	-384.25	-381
	3202	-405	-382	-388.5
	3204	-414	-385	-389
	3206	-408.25	-387.5	-381
	3208	-405.5	-386.75	-383.75
	3210	-404.75	-378	-388.75
	3212	-412.5	-383.75	-388
	3214	-411.25	-379.75	-384.25
	3216	-418.75	-383.75	-385.75
	3218	-413.75	-378.75	-387.25
	3220	-415.5	-382.5	-383
	3222	-413	-385.25	-380.25
	3224	-409	-382.75	-377.25
	3226	-410.5	-386	-382.25
	3228	-409.75	-387.25	-382
	3230	-421.25	-385.75	-381.25
	3232	-413.75	-381.5	-383.75
	3234	-406.5	-384.75	-375.25
	3236	-411.25	-378.5	-384
	3238	-410.5	-383.5	-383.5
	3240	-406.5	-383.25	-382.75
	3242	-411.75	-382.25	-380
	3244	-410.75	-381.25	-385.75
	3246	-408.25	-381.25	-380.75
	3248	-413	-386.75	-380
	3250	-414	-374	-383.5
	3252	-412.5	-381.5	-384.25
	3254	-411.75	-382.25	-383.75
	3256	-409	-387.5	-383.75
	3258	-406	-381	-382.5
	3260	-410.75	-377.5	-389.25
	3262	-410.5	-377.5	-377.25
	3264	-411.5	-384.25	-385
	3266	-416.25	-384.5	-382.75
	3268	-410.25	-387.75	-387
	3270	-409.75	-380.5	-382
	3272	-412	-377.5	-386.75
	3274	-410	-382	-382.75
	3276	-415.75	-388	-382.25
	3278	-414.5	-382	-386.5
	3280	-414.5	-384	-376.25
	3282	-411	-383.75	-382.75
	3284	-414.5	-384.25	-381.75
	3286	-410	-379.5	-383.75
	3288	-409.5	-385.75	-381.25
	3290	-410	-382.75	-383.5
	3292	-412.75	-384.75	-382.5
	3294	-412.75	-378	-385.5
	3296	-411.5	-379.75	-384.25
	3298	-414	-380.5	-384.5
	3300	-420.25	-382.75	-385.75
	3302	-416	-382.25	-381.75
	3304	-413	-379.75	-386.5
	3306	-411.5	-382.75	-387.75
	3308	-410.5	-383.75	-384.5
	3310	-412.25	-384.25	-387.25
	3312	-415.25	-383.5	-383.5
	3314	-412.25	-382.75	-384.25
	3316	-416.5	-385.5	-386.5
	3318	-410	-383.25	-383.5
	3320	-407.25	-379.75	-384
	3322	-412	-381.75	-381.75
	3324	-408.5	-383.25	-384.75
	3326	-409	-383.5	-385.25
	3328	-409.75	-378.25	-385
	3330	-413.25	-379.25	-386.5
	3332	-413.75	-381.5	-387
	3334	-414.25	-383	-382
	3336	-408.25	-378.25	-387.5
	3338	-415.25	-379.5	-386.5
	3340	-407.75	-379.25	-384
	3342	-411.5	-381	-381
	3344	-415.75	-383.25	-383.75
	3346	-410	-382.75	-390.5
	3348	-411.25	-384.5	-385
	3350	-420	-385.25	-386.25
	3352	-414.25	-379.5	-385.25
	3354	-409.5	-379.25	-386.5
	3356	-410.25	-376.75	-384.5
	3358	-413	-380.5	-380.25
	3360	-411.75	-385	-386.75
	3362	-412	-386.25	-385
	3364	-412	-380.25	-384.25
	3366	-414.5	-382.75	-383.5
	3368	-410.5	-380	-383.25
	3370	-411.5	-383	-389.5
	3372	-413.75	-381	-381.5
	3374	-407	-383.75	-377.25
	3376	-412.5	-381	-384.75
	3378	-415.5	-379.75	-383.75
	3380	-411.25	-383.25	-382
	3382	-412.25	-379.5	-383.25
	3384	-411.25	-384.75	-388.25
	3386	-412.75	-384.25	-381.25
	3388	-410.5	-379	-383.25
	3390	-414.25	-383.25	-387
	3392	-411.75	-383	-382.75
	3394	-413	-384	-386.25
	3396	-413	-386.75	-382.25
	3398	-424.25	-382.25	-386.75
	3400	-407.25	-377.75	-381.75
	3402	-411.25	-380.5	-385
	3404	-417	-378.5	-383.75
	3406	-410	-375.5	-382
	3408	-418.75	-381	-389.25
	3410	-411.5	-380.75	-382.25
	3412	-411.75	-383.25	-384.25
	3414	-412	-383.75	-384
	3416	-418.5	-384	-387
	3418	-416.25	-383.75	-385
	3420	-415.25	-377.75	-385.5
	3422	-414.75	-386.75	-384.75
	3424	-410.75	-386.75	-382.5
	3426	-409	-381.25	-386.5
	3428	-414.75	-376.5	-383.75
	3430	-416.5	-380.5	-386
	3432	-409.25	-381.5	-385
	3434	-414.5	-378	-383.75
	3436	-415.75	-378.5	-382.75
	3438	-414	-384.75	-383
	3440	-413.25	-380.5	-380
	3442	-407	-384.5	-386.5
	3444	-417	-383.25	-383.25
	3446	-411.5	-382.75	-383.5
	3448	-414.25	-380.5	-382
	3450	-417.75	-385.5	-383.75
	3452	-412	-378.75	-383
	3454	-418.5	-382.5	-383
	3456	-411.25	-385.75	-384.5
	3458	-411.5	-383.25	-379.5
	3460	-414.75	-384	-386.25
	3462	-415.75	-382.25	-384.25
	3464	-408.5	-380.75	-385.75
	3466	-417.5	-381.75	-382.75
	3468	-412.5	-384.5	-382.5
	3470	-419	-383.25	-384.25
	3472	-410	-378	-388.75
	3474	-411	-382.5	-387
	3476	-411	-389.25	-382.75
	3478	-410.5	-382	-385.25
	3480	-416.75	-382	-386.25
	3482	-411.25	-383	-385.5
	3484	-411.75	-384.75	-381.25
	3486	-417.5	-379.25	-383.25
	3488	-414.5	-376	-387.75
	3490	-414.75	-382.75	-383.75
	3492	-412.5	-374.75	-381.75
	3494	-410.75	-381.75	-383.5
	3496	-414	-377.25	-389.5
	3498	-408.75	-381	-387.5
	3500	-411.5	-380	-382.25
	3502	-406	-383.5	-384.25
	3504	-407.75	-375.5	-385.25
	3506	-409.25	-382.75	-384.5
	3508	-411.75	-384	-385.5
	3510	-415.25	-386	-389.75
	3512	-411	-381	-388.75
	3514	-412.75	-383.25	-383
	3516	-416	-384.75	-385
	3518	-416.25	-383.25	-383.75
	3520	-415.75	-384.25	-382.25
	3522	-411.25	-383.5	-386
	3524	-416.25	-381.25	-384.5
	3526	-415.5	-384.5	-382.25
	3528	-416	-381.75	-385.25
	3530	-414	-381.25	-380.25
	3532	-414.25	-378.25	-387.5
	3534	-415.5	-382.75	-381
	3536	-409.75	-382.5	-379.75
	3538	-415	-383.25	-386.75
	3540	-409.75	-376.25	-384
	3542	-413.5	-378	-385
	3544	-411.25	-382.5	-385.5
	3546	-415.25	-389.5	-382
	3548	-414	-381.75	-385.75
	3550	-412.75	-383.5	-385.25
	3552	-405.75	-378.25	-380
	3554	-412.25	-379.75	-385.75
	3556	-410.5	-377.75	-388
	3558	-412.75	-377.75	-384.5
	3560	-412.5	-385.25	-384.75
	3562	-413.25	-383	-381.75
	3564	-413	-377	-383.5
	3566	-412.25	-383.75	-384
	3568	-415.25	-381.25	-386.25
	3570	-417.5	-381.25	-381.25
	3572	-416.75	-380.75	-384.75
	3574	-413	-381.25	-386
	3576	-411.5	-383.5	-381.5
	3578	-410.5	-378.25	-383.5
	3580	-414.5	-385	-388
	3582	-412.25	-379.25	-385.25
	3584	-411.25	-380.25	-379
	3586	-414.5	-378	-381
	3588	-416.75	-374.5	-387.75
	3590	-411	-383.25	-383.25
	3592	-409.5	-380.75	-381.75
	3594	-416.5	-386.5	-388.25
	3596	-413.5	-375.5	-388
	3598	-410.25	-385.25	-379.75
	3600	-415.25	-382.75	-387
	3602	-411	-384.25	-386
	3604	-409.75	-376.5	-385.5
	3606	-411	-382.75	-384
	3608	-413.25	-380	-385
	3610	-413.75	-381.5	-385
	3612	-411.25	-383	-386.5
	3614	-409.25	-380.75	-382.5
	3616	-416.5	-383	-382.25
	3618	-414	-380	-386.25
	3620	-413.75	-377.5	-390.25
	3622	-407.5	-382.25	-382.25
	3624	-415	-380.25	-386
	3626	-412.5	-380	-387.5
	3628	-418.75	-384.25	-385
	3630	-413	-380.75	-385
	3632	-412	-380.25	-383
	3634	-412	-377.5	-386.25
	3636	-414.5	-377.75	-384.75
	3638	-412	-386.25	-387
	3640	-415	-379.25	-382.25
	3642	-418	-385.75	-386.5
	3644	-412.75	-383	-383.5
	3646	-412.75	-380.5	-376.5
	3648	-415.5	-386.25	-385.25
	3650	-418	-381.25	-386.75
	3652	-413.5	-379	-385.25
	3654	-416.25	-383.75	-388
	3656	-414.75	-382	-386.25
	3658	-412	-376.75	-388
	3660	-414.25	-382.25	-384.5
	3662	-412.5	-383	-388
	3664	-413.75	-383.5	-388.25
	3666	-415	-378	-381.75
	3668	-414.5	-377.5	-384.75
	3670	-412	-380	-388.5
	3672	-414.75	-379.75	-384.25
	3674	-411.25	-379	-382.25
	3676	-411.5	-382.25	-382.75
	3678	-412	-387.25	-387.5
	3680	-412	-381.5	-383
	3682	-411	-380	-382.5
	3684	-410.25	-380.25	-385
	3686	-412.5	-375.75	-381.75
	3688	-413.5	-384.25	-384.75
	3690	-412.25	-383.25	-380.25
	3692	-413.5	-382.5	-382
	3694	-407.5	-375	-384.75
	3696	-409.25	-380.75	-387.25
	3698	-412.25	-378.25	-386
	3700	-415.5	-378.25	-388.25
	3702	-412	-378.5	-384.75
	3704	-413.25	-377.25	-381
	3706	-412.75	-380.25	-385.5
	3708	-415.5	-378	-384.75
	3710	-413.5	-379.5	-385.5
	3712	-412.25	-382.75	-385.5
	3714	-417.25	-381	-381.25
	3716	-413.75	-382.5	-382.5
	3718	-417.5	-379	-387.5
	3720	-413.5	-380.75	-380.5
	3722	-415.75	-380.75	-387.75
	3724	-419.25	-375.75	-389.5
	3726	-416.5	-381	-385
	3728	-409.25	-379	-384.25
	3730	-416	-379.25	-382.25
	3732	-410.75	-379.75	-386.75
	3734	-411.25	-377	-387.5
	3736	-415.75	-376.25	-384
	3738	-413.25	-374.75	-381
	3740	-409.25	-376	-386.25
	3742	-413	-380	-386.25
	3744	-411.25	-379	-384.75
	3746	-408.75	-383.75	-385.5
	3748	-416.5	-384	-382.5
	3750	-408.75	-380.75	-383.75
	3752	-409.75	-378.5	-380.75
	3754	-415.25	-377.75	-383.75
	3756	-409.25	-383.25	-375.5
	3758	-414.5	-376.75	-381.5
	3760	-411.75	-380	-385.25
	3762	-414.5	-382.75	-383.25
	3764	-417.5	-377.25	-383
	3766	-413.75	-380.25	-384.25
	3768	-410.75	-379.75	-384
	3770	-414.25	-384.75	-385.25
	3772	-414.75	-379	-382.5
	3774	-412.75	-381.25	-388.5
	3776	-413.75	-376.5	-386.25
	3778	-412.75	-382.5	-383
	3780	-408.75	-378.5	-391.25
	3782	-410.25	-378.5	-384
	3784	-415.25	-377	-386
	3786	-415.5	-381.75	-386
	3788	-411	-383.5	-387.5
	3790	-410.5	-377.5	-385
	3792	-418	-381	-380.5
	3794	-411	-385.25	-383.25
	3796	-414.75	-383.25	-382.25
	3798	-415	-383.75	-384.25
	3800	-410	-381.75	-378
	3802	-414	-379.25	-380
	3804	-408.75	-382.75	-382.5
	3806	-411.25	-378.5	-382
	3808	-414.75	-380	-388.75
	3810	-414.75	-380.25	-387.5
	3812	-413.5	-381.25	-387
	3814	-414.25	-379.5	-388.5
	3816	-419	-375.5	-388.25
	3818	-409.5	-375.75	-387.5
	3820	-407.75	-377	-385.75
	3822	-414.25	-381.75	-385
	3824	-414.25	-383.75	-390.75
	3826	-412	-382.25	-382.25
	3828	-414	-384.25	-380.5
	3830	-416.25	-381	-387.75
	3832	-413	-380.5	-387.25
	3834	-410.5	-378.5	-385
	3836	-411.5	-384.75	-387
	3838	-414	-380.25	-385.25
	3840	-409.75	-379.75	-380.5
	3842	-415	-378.75	-383.75
	3844	-416.25	-380.5	-381.75
	3846	-416.75	-377	-382
	3848	-415.5	-383	-387.75
	3850	-411.5	-387.25	-385.75
	3852	-408.75	-376.25	-381
	3854	-412.75	-375.25	-379.5
	3856	-409	-376	-385.5
	3858	-412.25	-381.25	-383.5
	3860	-411	-372.75	-383
	3862	-413.25	-376.75	-386
	3864	-414.25	-378.25	-387.75
	3866	-417.25	-383.5	-383.5
	3868	-415.75	-380.25	-385.75
	3870	-406.75	-383.5	-380
	3872	-412.75	-379.75	-380.5
	3874	-414.75	-383.25	-382.75
	3876	-410.25	-376.25	-383.25
	3878	-413.25	-389	-386.25
	3880	-411.25	-379.5	-386.25
	3882	-416	-381	-383.25
	3884	-416	-377	-383.5
	3886	-410.25	-376.5	-386.25
	3888	-406.25	-379.25	-386
	3890	-414.75	-382.25	-380.25
	3892	-417.75	-384.75	-382.75
	3894	-414.25	-383	-381
	3896	-414	-381	-379.75
	3898	-414.25	-382	-377
	3900	-414.25	-381.25	-381.75
	3902	-410.75	-373.25	-388.25
	3904	-412.25	-379.25	-387.25
	3906	-411.75	-375.25	-387.5
	3908	-408.5	-381.75	-386.75
	3910	-412	-378.25	-386
	3912	-410.5	-381	-380.75
	3914	-410.25	-379.5	-385.5
	3916	-411.5	-379.25	-388
	3918	-411.25	-380	-386
	3920	-413.75	-385.25	-390.5
	3922	-406.75	-380.25	-383.5
	3924	-415	-380	-383
	3926	-411.25	-383.5	-389
	3928	-413.5	-383	-385
	3930	-412	-385	-389.75
	3932	-408.5	-377.5	-387.5
	3934	-411	-381.75	-386.75
	3936	-417	-380.75	-387.5
	3938	-411.5	-382.25	-381.25
	3940	-412.75	-377	-383.5
	3942	-414	-383.25	-385.5
	3944	-415	-377.75	-388
	3946	-404.75	-376.5	-384.25
	3948	-413.75	-375.25	-381
	3950	-411	-379.75	-382
	3952	-412.5	-379.75	-387
	3954	-414.75	-379.5	-385.75
	3956	-411.25	-382	-383.75
	3958	-412.25	-375.25	-386.25
	3960	-412	-379	-386.75
	3962	-411.75	-368	-383
	3964	-415	-372.75	-382.75
	3966	-403.5	-386.75	-387
	3968	-434.75	-387.25	-362.75
	3970	-404.5	-380.25	-399.5
	3972	-410	-378.75	-396
	3974	-411.75	-374	-389.75
	3976	-412	-366.75	-385.5
	3978	-411	-356	-383.75
	3980	-403.25	-353.5	-380.75
	3982	-389.75	-346.75	-385
	3984	-384	-351.25	-379.5
	3986	-372.75	-362.25	-372.75
	3988	-365.25	-360.5	-369.5
	3990	-365.25	-365.5	-365.5
[truncated: 504 more rows]
[truncated: 22 more columns]

## Sheet: Sheet2
	1	1	1	1	1	1	1	1	1	1	1	1	1	1	1	1
	0.76875	0.671233		0.6	0.528571	0.716667	0.920635	0.5	0.915152	0.923077	0.886792	0.71875	0.737864	0.862069	0.811765	0.857143
	0.70625	0.513699	0.473684	0.514286	0.428571	0.266667		0.395349	0.660606	0.671329	0.45283			0.613027	0.541176	0.357143
		0.136986	-0.197368	-0.0428571	-0.0285714	-0.2		0.267442	0.0484848	0.153846	0.0283019	-0.3125	-0.194175		0.0411765	-0.0816327
	-1	-1	-1	-1	-1	-1	-1	-1	-1	-1	-1	-1	-1	-1	-1	-1
	-0.76875	-0.671233		-0.6	-0.528571	-0.716667	-0.920635	-0.5	-0.915152	-0.923077	-0.886792	-0.71875	-0.737864	-0.862069	-0.811765	-0.857143
	-0.70625	-0.513699	-0.473684	-0.514286	-0.428571	-0.266667		-0.395349	-0.660606	-0.671329	-0.45283			-0.613027	-0.541176	-0.357143
		-0.136986	0.197368	0.0428571	0.0285714	0.2		-0.267442	-0.0484848	-0.153846	-0.0283019	0.3125	0.194175		-0.0411765	0.0816327
	1	1	1	1	1	1	1	1	1	1	1	1	1	1
	0.852174	0.892857		0.884615		1.00763	0.956835	0.848739	0.929471	0.954248		0.92	0.977778	1.03704
		0.9375	0.876033	0.951923	0.754967		0.870504	0.739496			0.794258			0.975309
		0.714286	0.727273	0.721154			0.820144	0.655462			0.669856			0.691358
	-1	-1	-1	-1	-1	-1	-1	-1	-1	-1	-1	-1	-1	-1
	-0.852174	-0.892857		-0.884615		-1.00763	-0.956835	-0.848739	-0.929471	-0.954248	0	-0.92	-0.977778	-1.03704
		-0.9375	-0.876033	-0.951923	-0.754967		-0.870504	-0.739496			-0.794258			-0.975309
		-0.714286	-0.727273	-0.721154			-0.820144	-0.655462			-0.669856			-0.691358
	1	1	1	1	1	1	1	1	1	1	1	1	1	1	1	1	1	1	1	1	1
	0.306569	0.347107	0.222222				0.271318				0.194444							0.580645		0.352113
	0.0656934	0.264463	0.177778	0.0634921			0.108527	0.10241		0.057971	0.0902778					0.485597		0.253165	0.383562	0.323944
	-0.0510949	0.173554	0	-0.015873	-0.0307692	0.00636943	0.139535	0.0963855	-0.153846	0	-0.00694444	-0.111111	-0.194175	0.398551	0.0540541	0.037037	0.221649	-0.177215	0.164384	0.211268	-0.102941
	-1	-1	-1	-1	-1	-1	-1	-1	-1	-1	-1	-1	-1	-1	-1	-1	-1	-1	-1	-1	-1
	-0.306569	-0.347107	-0.222222				-0.271318				-0.194444							-0.580645		-0.352113
	-0.0656934	-0.264463	-0.177778	-0.0634921			-0.108527	-0.10241		-0.057971	-0.0902778					-0.485597		-0.253165	-0.383562	-0.323944
	0.0510949	-0.173554	0	0.015873	0.0307692	-0.00636943	-0.139535	-0.0963855	0.153846	0	0.00694444	0.111111	0.194175	-0.398551	-0.0540541	-0.037037	-0.221649	0.177215	-0.164384	-0.211268	0.102941
	0.490196	0.472222	0.581395	0.472222	0.444444	0.537037	0.462963	0.659091	0.522727	0.589041	0.594203	0.658537	0.591837	0.438356	0.485714	0.481481	0.464286	0.5	0.592593	0.566667	0.57971	0.449275	0.564103	0.666667	0.633333	0.666667	0.666667	0.583333	0.615385
	0.136986	-0.197368	-0.0428571	-0.0285714	-0.2	0.267442	0.0484848	0.153846	0.0283019	-0.3125	-0.194175	0.0411765	-0.0816327
	-0.0510949	0.173554	0	-0.015873	-0.0307692	0.00636943	0.139535	0.0963855	-0.153846	0	-0.00694444	-0.111111	-0.194175	0.398551	0.0540541	0.037037	0.221649	-0.177215	0.164384	0.211268	-0.102941
	0.714286	0.727273	0.721154	0.820144	0.655462	0.669856	0.691358
	0.808824	0.90625	0.40099	0.413408	0.622951	0.75	0.584416	0.571429	0.618182	0.625	0.670968
	-0.490196	-0.472222	-0.581395	-0.472222	-0.444444	-0.537037	-0.462963	-0.659091	-0.522727	-0.589041	-0.594203	-0.658537	-0.591837	-0.438356	-0.485714	-0.481481	-0.464286	-0.5	-0.592593	-0.566667	-0.57971	-0.449275	-0.564103	-0.666667	-0.633333	-0.666667	-0.666667	-0.583333	-0.615385
	-0.136986	0.197368	0.0428571	0.0285714	0.2	-0.267442	-0.0484848	-0.153846	-0.0283019	0.3125	0.194175	-0.0411765	0.0816327
	0.0510949	-0.173554	0	0.015873	0.0307692	-0.00636943	-0.139535	-0.0963855	0.153846	0	0.00694444	0.111111	0.194175	-0.398551	-0.0540541	-0.037037	-0.221649	0.177215	-0.164384	-0.211268	0.102941
	-0.714286	-0.727273	-0.721154	-0.820144	-0.655462	-0.669856	-0.691358
	-0.808824	-0.90625	-0.40099	-0.413408	-0.622951	-0.75	-0.584416	-0.571429	-0.618182	-0.625	-0.670968
