# Supplementary material for: Conserved allosteric inhibition mechanism in SLC1 transporters
Source: eLife. 2023 Mar 1;12:e83464. doi: 10.7554/eLife.83464 (PMC10017108; doi:10.7554/eLife.83464)
Supplement: Figure 8—source data 1. [file elife-83464-fig8-data1.xlsx]

## Sheet: Sheet1
Figure 8 original data		ASCT2WT-UCPH
Figure 8A	1mM Ser only control (anion condition)																			Figure 8B	1mM Ser+100uM UCPH (anion condition)																			Figure 8C	100µM UCPH only control (anion condition)
	Time (ms)	Trace#1	Trace#2	Trace#3	Trace#4	Trace#5	Trace#6	Trace#7	Trace#8	Trace#9	Trace#10	Trace#11	Trace#12	Trace#13	Trace#14	Trace#15	Trace#16				Time (ms)	Trace#1	Trace#2	Trace#3	Trace#4	Trace#5	Trace#6	Trace#7	Trace#8	Trace#9	Trace#10	Trace#11	Trace#12	Trace#13	Trace#14	Trace#15	Trace#16				Time (ms)	Trace#1	Trace#2	Trace#3	Trace#4	Trace#5	Trace#6	Trace#7	Trace#8
	0	-158.713	-158.307	-159.21	-160.239	-157.403	-158.365	-159.28	-158.684	-164.576	-163.25	-162.404	-159.592	-159.343	-160.946	-160.461	-159.383				0	-161.443	-162.953	-157.856	-160.758	-165.279	-170.158	-167.918	-172.789	-168.765	-172.219	-168.377	-168.87	-160.448	-159.694	-157.253	-153.538				0	-159.297	-160.327	-159.507	-159.415	-160.031	-161.742	-161.243	-160.243
	0.1	-158.727	-158.71	-158.901	-159.563	-158.291	-158.409	-159.201	-158.388	-163.362	-163.461	-161.991	-159.478	-159.391	-161.044	-159.93	-159.819				0.1	-162.039	-163.022	-158.173	-160.543	-164.96	-170.558	-168.099	-172.379	-167.633	-172.116	-169.232	-169.164	-159.886	-160.78	-156.849	-153.947				0.1	-159.086	-160.109	-159.617	-159.245	-159.771	-161.758	-161.17	-160.17
	0.2	-158.865	-159.045	-158.378	-158.706	-159.155	-158.076	-158.932	-158.291	-162.437	-163.243	-162.114	-159.193	-159.203	-161.054	-159.99	-160.187				0.2	-162.422	-162.691	-158.511	-160.208	-164.604	-170.542	-168.094	-171.173	-166.667	-172.225	-169.869	-168.818	-159.299	-161.983	-156.226	-154.623				0.2	-158.558	-159.927	-159.748	-159.301	-159.188	-161.7	-160.955	-159.955
	0.3	-159.179	-159.332	-158.291	-158.038	-159.67	-157.54	-158.486	-158.69	-161.727	-162.53	-162.543	-159.048	-158.812	-161.278	-160.755	-160.194				0.3	-162.29	-161.914	-159.023	-159.758	-164.339	-170.105	-167.883	-169.428	-166.533	-172.35	-169.987	-167.833	-159.076	-162.314	-155.281	-155.584				0.3	-158.073	-159.862	-159.922	-159.314	-158.734	-161.48	-160.864	-159.864
	0.4	-159.532	-159.678	-159.045	-157.881	-159.95	-157.154	-158.055	-159.517	-160.94	-162.059	-162.644	-159.096	-158.511	-161.646	-161.576	-160.056				0.4	-161.768	-160.987	-159.495	-159.427	-164.189	-169.837	-168.098	-168.151	-167.076	-172.039	-169.921	-167.189	-159.098	-161.754	-154.626	-156.284				0.4	-158.012	-159.92	-160.119	-159.048	-158.78	-160.822	-160.995	-159.995
	0.5	-159.748	-159.815	-160.117	-158.237	-159.96	-156.784	-157.722	-160.121	-160.374	-162.436	-162.305	-159.003	-158.525	-161.663	-161.698	-160.293				0.5	-161.236	-160.087	-159.373	-159.17	-163.955	-170.165	-169.005	-167.676	-167.275	-171.608	-170.004	-167.333	-159.053	-161.176	-154.717	-156.231				0.5	-158.046	-159.777	-160.146	-158.747	-158.938	-160.144	-161.158	-160.158
	0.6	-159.636	-159.655	-160.728	-159.006	-159.424	-156.34	-157.333	-160.278	-160.393	-163.152	-161.946	-159.034	-159.142	-161.487	-161.223	-160.663				0.6	-161.082	-159.652	-158.661	-158.947	-163.751	-170.709	-169.643	-167.634	-167.102	-171.722	-170.012	-167.559	-159.248	-160.933	-155.248	-156.034				0.6	-157.963	-159.306	-160.083	-158.551	-158.846	-160.214	-161.216	-160.216
	0.7	-159.126	-159.312	-160.635	-159.887	-158.645	-156.033	-156.819	-160.358	-160.512	-163.104	-161.747	-159.581	-160.165	-161.386	-160.745	-160.651				0.7	-161.374	-159.977	-157.938	-158.976	-163.593	-170.814	-169.238	-167.785	-167.328	-172.125	-169.719	-167.281	-159.425	-160.925	-156.006	-156.495				0.7	-158.054	-158.938	-159.935	-158.263	-158.593	-160.523	-161.049	-160.049
	0.8	-158.703	-158.819	-160.553	-160.635	-158.391	-156.002	-156.641	-160.48	-160.437	-162.392	-161.754	-160.415	-160.845	-161.393	-160.534	-160.729				0.8	-161.73	-160.947	-157.657	-159.325	-163.599	-170.737	-168.506	-168.154	-168.218	-172.645	-169.429	-166.751	-159.183	-160.943	-156.902	-157.416				0.8	-158.485	-159.036	-159.569	-158.181	-158.606	-160.345	-160.762	-159.762
	0.9	-158.563	-158.318	-160.899	-160.986	-158.646	-155.87	-156.89	-160.433	-160.491	-161.914	-161.835	-160.975	-160.639	-161.509	-160.281	-161.04				0.9	-161.846	-162.035	-157.684	-159.577	-164.336	-170.895	-168.219	-168.568	-169.236	-173.421	-169.362	-166.432	-159.159	-160.56	-157.292	-157.993				0.9	-158.975	-159.263	-159.059	-158.595	-159.145	-160.013	-160.485	-159.485
	1	-158.219	-158.093	-160.924	-160.67	-158.953	-155.434	-156.92	-160.422	-160.832	-161.978	-161.744	-161.033	-159.912	-161.554	-160.023	-160.964				1	-162.193	-162.511	-157.943	-159.616	-165.87	-171.122	-168.524	-168.989	-169.618	-174.044	-169.37	-166.604	-159.73	-159.953	-156.87	-157.92				1	-159.358	-159.421	-158.544	-159.265	-159.837	-159.935	-160.294	-159.294
	1.1	-157.633	-158.16	-160.278	-159.798	-159.089	-155.224	-156.576	-160.499	-161.201	-162.346	-161.555	-160.871	-159.449	-161.281	-160.077	-160.444				1.1	-162.754	-162.407	-158.54	-159.606	-166.886	-171.198	-169.247	-169.557	-169.06	-174.015	-169.034	-166.9	-160.327	-159.618	-156.073	-157.144				1.1	-159.659	-159.617	-157.957	-159.734	-160.095	-159.871	-160.206	-159.206
	1.2	-157.361	-158.331	-159.637	-159.045	-158.933	-155.659	-156.607	-160.218	-161.484	-162.76	-161.622	-160.824	-159.36	-160.859	-160.332	-159.926				1.2	-162.599	-162.17	-159.134	-159.216	-166.351	-170.987	-169.819	-170.095	-168.138	-173.593	-168.169	-166.811	-160.615	-159.583	-155.499	-156.24				1.2	-159.84	-159.422	-157.477	-159.612	-159.752	-159.705	-160.17	-159.17
	1.3	-157.475	-158.493	-159.337	-158.739	-158.565	-156.404	-157.151	-159.653	-161.675	-163.063	-162.003	-160.736	-159.385	-160.723	-160.678	-159.453				1.3	-161.523	-161.672	-159.236	-158.415	-164.952	-170.297	-170.013	-170.268	-167.574	-173.46	-167.347	-166.631	-160.694	-159.756	-155.456	-156.216				1.3	-159.813	-158.65	-157.545	-158.997	-159.123	-159.586	-160.447	-159.447
	1.4	-157.491	-158.532	-159.324	-158.524	-158.286	-156.959	-157.583	-159.286	-161.575	-163.198	-162.405	-160.156	-159.519	-160.948	-161.036	-159.033				1.4	-160.305	-160.623	-158.851	-158.03	-164.018	-169.714	-170.227	-170.162	-167.404	-173.822	-167.365	-166.525	-160.773	-160.182	-155.948	-156.983				1.4	-159.682	-158.262	-158.08	-158.499	-158.822	-159.441	-161.165	-160.165
	1.5	-157.101	-158.569	-159.46	-158.464	-158.299	-157.291	-157.816	-159.114	-161.219	-163.307	-162.511	-159.059	-159.594	-161.019	-161.111	-158.917				1.5	-159.818	-159.422	-158.389	-158.627	-163.71	-169.983	-170.429	-169.857	-167.363	-173.971	-168.313	-166.206	-161	-160.753	-156.787	-157.356				1.5	-159.852	-158.864	-158.53	-158.331	-158.874	-159.199	-161.556	-160.556
	1.6	-156.658	-158.712	-159.307	-159.153	-158.883	-157.561	-157.977	-158.875	-161.044	-163.608	-162.401	-157.966	-159.422	-160.584	-160.765	-159.176				1.6	-160.303	-159.062	-158.391	-159.775	-163.12	-170.631	-170.129	-169.185	-167.569	-173.403	-169.449	-165.833	-160.797	-161.234	-157.615	-156.842				1.6	-160.378	-159.736	-158.5	-158.124	-158.932	-159.061	-161.134	-160.134
	1.7	-156.888	-158.72	-159.015	-160.552	-160.042	-157.603	-157.877	-158.669	-161.172	-163.812	-162.458	-157.407	-159.071	-159.991	-160.231	-159.598				1.7	-161.288	-159.715	-159.062	-160.485	-162.112	-170.866	-169.465	-168.565	-168.153	-172.668	-169.975	-165.672	-159.566	-161.322	-157.939	-156.129				1.7	-160.756	-160.107	-158.061	-157.839	-159.112	-158.939	-160.533	-159.533
	1.8	-157.807	-158.551	-159.171	-161.622	-160.996	-157.285	-157.537	-158.707	-161.204	-163.396	-162.72	-157.692	-158.931	-159.628	-160.028	-159.99				1.8	-162.346	-160.268	-159.738	-160.27	-161.457	-170.683	-169.208	-168.6	-168.687	-172.221	-169.786	-165.585	-158.131	-160.829	-157.548	-155.683				1.8	-160.616	-159.961	-157.659	-157.783	-159.356	-158.585	-160.254	-159.254
	1.9	-158.509	-158.368	-159.636	-161.393	-161.024	-156.904	-157.202	-158.699	-161.041	-162.588	-162.83	-158.788	-159.432	-159.554	-160.502	-160.274				1.9	-163.118	-159.891	-159.706	-159.635	-161.449	-170.387	-169.767	-169.039	-168.547	-172.19	-169.327	-165.524	-158.02	-160.347	-156.887	-155.385				1.9	-160.105	-159.739	-157.657	-157.989	-159.443	-158.405	-160.202	-159.202
	2	-158.192	-158.095	-160.025	-160.231	-160.311	-156.711	-157.069	-158.291	-161.201	-162.082	-162.444	-160.12	-160.277	-159.602	-161.097	-160.332				2	-163.307	-159.151	-159.311	-159.384	-162.034	-170.235	-170.622	-169.541	-167.642	-172.635	-168.964	-165.725	-159.285	-160.57	-156.399	-155.212				2	-159.683	-159.808	-157.79	-158.287	-159.449	-158.953	-160.207	-159.207
	2.1	-157.16	-157.724	-160.128	-159.201	-159.438	-156.767	-157.265	-157.667	-161.728	-162.126	-161.608	-160.984	-160.614	-159.458	-161.006	-160.169				2.1	-162.995	-159.249	-159.185	-159.737	-163.248	-170.502	-171.109	-170.09	-166.559	-173.032	-168.52	-166.25	-160.673	-161.216	-156.029	-155.404				2.1	-159.532	-159.908	-157.668	-158.651	-159.404	-159.809	-160.115	-159.115
	2.2	-156.379	-157.716	-159.419	-158.529	-158.748	-157.102	-157.787	-157.275	-161.999	-162.593	-160.801	-161.083	-160.156	-159.2	-160.493	-159.993				2.2	-162.453	-160.141	-159.038	-160.205	-164.548	-171.438	-171.323	-170.647	-166.145	-172.92	-167.872	-166.635	-161.209	-161.617	-155.794	-155.962				2.2	-159.354	-159.654	-157.516	-159.223	-159.399	-160.115	-159.955	-158.955
	2.3	-156.472	-158.529	-158.003	-158.021	-158.516	-157.666	-158.392	-157.402	-161.854	-163.015	-160.406	-160.551	-159.43	-159.43	-160.335	-160.003				2.3	-162.063	-160.611	-158.473	-160.382	-165.063	-172.902	-171.388	-171.183	-166.701	-172.617	-167.353	-166.758	-160.844	-161.375	-155.86	-156.636				2.3	-159.098	-159.271	-157.619	-159.86	-159.697	-159.766	-159.91	-158.91
	2.4	-157.21	-159.707	-157.493	-158.049	-158.879	-158.201	-158.762	-158.047	-161.68	-162.716	-160.515	-159.713	-158.889	-160.236	-160.761	-160.234				2.4	-162.131	-160.141	-157.841	-160.407	-164.771	-173.864	-171.016	-171.373	-167.449	-172.709	-167.427	-167.14	-160.244	-160.725	-156.03	-157.252				2.4	-158.998	-159.113	-157.924	-159.998	-160.001	-159.477	-160.122	-159.122
	2.5	-157.904	-160.227	-158.739	-158.786	-159.199	-158.51	-158.72	-158.972	-161.644	-161.882	-160.922	-159.071	-158.481	-160.796	-161.723	-160.211				2.5	-162.696	-159.343	-157.697	-160.303	-164.279	-173.283	-170.327	-170.776	-167.802	-173.19	-168.12	-167.898	-160.069	-160.561	-156.24	-157.787				2.5	-158.951	-159.09	-158.274	-159.621	-159.645	-159.734	-160.461	-159.461
	2.6	-158.318	-159.87	-160.257	-159.548	-158.903	-158.642	-158.3	-159.58	-161.569	-161.487	-161.062	-158.938	-158.154	-160.679	-162.809	-159.541				2.6	-163.332	-158.995	-158.223	-159.875	-163.811	-171.593	-169.814	-170.011	-167.997	-173.327	-168.996	-168.418	-160.096	-161.19	-156.769	-158.171				2.6	-158.833	-158.82	-158.538	-159.311	-158.959	-160.262	-160.445	-159.445
	2.7	-158.737	-159.075	-160.651	-159.591	-158.4	-158.724	-157.63	-159.534	-161.446	-161.823	-160.763	-159.183	-158.201	-160.459	-163.273	-158.62				2.7	-163.388	-159.284	-159.098	-159.277	-163.328	-170.237	-169.784	-169.981	-168.019	-172.87	-169.654	-168.203	-159.735	-162.057	-157.277	-158.221				2.7	-158.814	-158.347	-158.465	-159.349	-158.741	-160.425	-159.901	-158.901
	2.8	-159.078	-158.254	-160.426	-159.097	-157.988	-158.822	-156.929	-159.56	-161.597	-162.316	-160.596	-159.747	-158.809	-160.641	-162.938	-157.959				2.8	-162.866	-159.897	-159.87	-158.889	-162.983	-170.006	-170.121	-170.366	-167.536	-172.534	-170.054	-167.196	-159.325	-162.531	-157.055	-158.119				2.8	-158.942	-158.157	-158.032	-159.56	-158.888	-159.992	-159.473	-158.473
	2.9	-158.847	-157.905	-160.274	-158.688	-157.415	-158.682	-156.526	-160.279	-161.992	-162.466	-160.882	-160.54	-159.539	-161.119	-162.032	-157.818				2.9	-162.475	-160.349	-160.276	-158.865	-163.092	-170.387	-170.391	-170.441	-166.597	-172.82	-170.403	-165.945	-159.636	-162.261	-156.391	-158.288				2.9	-159.214	-158.537	-157.87	-159.701	-158.975	-159.456	-159.667	-158.667
	3	-157.987	-158.313	-160.098	-158.894	-156.915	-157.982	-156.65	-161.114	-162.182	-162.272	-161.081	-161.016	-160.075	-161.469	-160.816	-158.249				3	-162.505	-160.216	-160.146	-159.239	-163.924	-170.503	-170.483	-170.092	-165.577	-173.376	-170.749	-165.422	-160.563	-161.778	-156.021	-158.786				3	-159.59	-159.203	-158.341	-159.673	-159.106	-159.386	-160.208	-159.208
	3.1	-157.173	-159.134	-159.779	-159.744	-157.042	-157.092	-157.299	-161.342	-161.979	-162.008	-160.843	-160.915	-160.48	-161.37	-159.647	-158.827				3.1	-162.516	-159.585	-159.788	-159.711	-164.98	-170.395	-170.678	-169.7	-165.082	-173.524	-170.991	-166.045	-161.28	-161.875	-156.004	-159.258				3.1	-159.578	-159.599	-158.918	-159.32	-159.5	-159.743	-160.514	-159.514
	3.2	-157.021	-159.942	-159.432	-160.311	-157.82	-156.755	-158.262	-160.795	-161.542	-162.025	-160.461	-160.43	-160.455	-161.224	-158.897	-159.04				3.2	-162.39	-159.359	-159.631	-159.695	-165.364	-170.738	-171.036	-169.483	-165.574	-173.05	-170.982	-166.97	-161.357	-162.057	-155.929	-159.05				3.2	-158.926	-159.446	-158.915	-158.675	-159.807	-160.141	-160.187	-159.187
	3.3	-157.599	-160.516	-159.383	-159.908	-158.509	-156.958	-159.047	-159.814	-161.274	-162.369	-160.232	-159.722	-159.604	-161.61	-158.983	-158.962				3.3	-162.513	-160.368	-159.44	-159.293	-165.216	-171.459	-171.403	-169.222	-166.607	-172.596	-170.251	-167.034	-160.969	-161.434	-155.552	-157.94				3.3	-158.297	-158.808	-158.482	-158.248	-159.4	-160.16	-159.478	-158.478
	3.4	-158.406	-160.555	-159.846	-159.183	-158.504	-157.149	-159.231	-159.141	-161.437	-162.475	-160.454	-159.142	-158.233	-162.134	-160.009	-158.989				3.4	-162.72	-161.953	-159.034	-158.939	-165.199	-171.832	-171.479	-168.904	-167.353	-172.605	-168.85	-166.104	-160.535	-160.418	-155.122	-156.502				3.4	-158.301	-158.42	-158.304	-158.265	-158.468	-159.673	-159.148	-158.148
	3.5	-158.684	-160.124	-160.368	-159.045	-158.233	-157.109	-158.847	-159.054	-161.718	-162.102	-161.102	-159.052	-157.311	-162.125	-161.333	-159.057				3.5	-162.623	-162.742	-158.835	-158.671	-165.194	-171.678	-171.095	-169.104	-167.87	-172.722	-167.694	-164.934	-160.254	-159.759	-154.989	-155.662				3.5	-158.697	-158.851	-158.426	-158.49	-157.867	-159.195	-159.432	-158.432
	3.6	-158.285	-159.488	-160.322	-159.548	-158.304	-157.004	-158.112	-159.015	-161.633	-161.919	-161.582	-159.293	-157.448	-161.559	-162.058	-158.695				3.6	-162.457	-162.77	-158.993	-158.831	-164.919	-171.621	-170.407	-170.043	-168.456	-172.773	-167.201	-164.167	-159.851	-159.53	-155.306	-156.06				3.6	-159.038	-159.525	-158.304	-158.767	-157.865	-159.128	-159.871	-158.871
	3.7	-157.619	-158.706	-159.823	-160.145	-158.598	-157.202	-157.693	-158.706	-161.117	-162.237	-161.809	-159.421	-158.154	-160.778	-161.912	-157.974				3.7	-162.409	-162.916	-159.146	-159.735	-164.488	-172.071	-169.594	-170.882	-168.725	-173.147	-167.053	-164.058	-159.146	-159.946	-156.006	-156.884				3.7	-159.177	-159.875	-157.877	-158.904	-158.277	-159.203	-160.081	-159.081
	3.8	-157.266	-158.075	-159.296	-160.388	-158.906	-157.885	-158.288	-158.441	-160.564	-162.581	-162.063	-159.362	-158.493	-160.245	-161.399	-157.436				3.8	-162.254	-163.042	-159.179	-160.82	-163.827	-172.298	-168.911	-170.568	-168.471	-173.868	-167.09	-164.608	-158.746	-161.281	-156.599	-156.884				3.8	-159.169	-160.036	-157.611	-158.745	-159.031	-159.091	-160.082	-159.082
	3.9	-157.52	-157.872	-158.753	-160.187	-159.278	-158.659	-159.277	-158.473	-160.32	-162.664	-162.06	-159.349	-158.217	-160.384	-161.107	-157.224				3.9	-162.14	-162.476	-159.179	-161.102	-163.029	-171.459	-168.724	-169.451	-168.112	-174.446	-167.424	-165.68	-159.473	-162.727	-156.381	-156.307				3.9	-159.031	-160.132	-157.717	-158.39	-159.794	-158.845	-160.223	-159.223
	4	-157.887	-157.959	-158.186	-159.763	-159.366	-159.017	-159.543	-158.6	-160.508	-162.503	-161.561	-159.565	-157.974	-160.987	-160.987	-157.438				4	-162.548	-161.446	-159.089	-160.432	-162.675	-170.367	-168.956	-169.098	-167.953	-174.455	-168.057	-167.03	-160.771	-162.938	-155.489	-155.757				4	-158.818	-160.101	-158.092	-158.152	-160.08	-158.725	-160.627	-159.627
	4.1	-157.826	-158.076	-158.09	-159.512	-158.74	-158.74	-159.044	-158.546	-161.218	-162.068	-160.848	-159.776	-158.19	-161.307	-160.743	-158.122				4.1	-163.421	-160.731	-159.123	-159.902	-163.01	-170.17	-169.35	-170.032	-167.882	-173.73	-168.389	-168.172	-161.27	-161.715	-154.862	-155.126				4.1	-158.711	-159.99	-158.745	-158.417	-159.721	-158.86	-160.839	-159.839
	4.2	-157.511	-158.107	-158.477	-159.591	-157.802	-157.818	-158.373	-158.504	-162.152	-161.488	-160.349	-159.612	-158.718	-161.115	-160.641	-158.777				4.2	-164.338	-160.591	-159.346	-160.453	-163.564	-170.386	-170.027	-171.199	-168.079	-172.538	-167.893	-168.723	-160.974	-160.222	-154.857	-154.44				4.2	-158.651	-159.838	-159.507	-159.028	-159.068	-159.08	-160.643	-159.643
	4.3	-157.532	-158.134	-158.696	-160.015	-157.395	-156.732	-158.052	-158.812	-162.85	-161.162	-160.275	-159.488	-159.313	-161.069	-160.827	-159.155				4.3	-164.818	-160.762	-159.196	-161.482	-163.819	-170.12	-170.724	-171.731	-168.705	-171.736	-167.397	-168.648	-160.715	-159.583	-155.158	-154.27				4.3	-158.564	-159.654	-159.823	-159.453	-158.704	-159.088	-160.523	-159.523
	4.4	-158.087	-158.336	-158.39	-160.517	-157.928	-156.153	-158.271	-159.455	-163.242	-161.266	-160.714	-160.023	-159.782	-161.493	-160.839	-159.467				4.4	-164.52	-161.061	-158.781	-161.725	-163.915	-169.485	-170.684	-171.531	-168.818	-171.911	-168.019	-167.967	-160.659	-159.906	-155.633	-154.823				4.4	-158.691	-159.496	-159.348	-159.529	-158.689	-158.886	-160.786	-159.786
	4.5	-158.582	-158.838	-157.791	-160.6	-159.293	-156.042	-158.782	-160.096	-163.24	-161.598	-161.507	-160.937	-160.147	-161.856	-160.561	-159.674				4.5	-163.826	-161.551	-158.909	-161.116	-164.158	-169.318	-169.708	-170.812	-167.816	-172.703	-169.271	-166.702	-160.84	-160.856	-156.387	-155.582				4.5	-158.902	-159.237	-158.456	-159.221	-158.69	-158.749	-161.118	-160.118
	4.6	-158.494	-159.362	-157.533	-160.221	-160.803	-155.919	-158.961	-160.181	-162.633	-161.982	-161.979	-161.57	-160.272	-161.748	-160.61	-159.645				4.6	-163.259	-162.029	-159.482	-160.594	-164.363	-169.942	-168.428	-169.994	-166.748	-173.462	-169.888	-165.357	-161.067	-162.091	-157.16	-156				4.6	-158.765	-158.83	-157.866	-158.68	-158.531	-158.792	-161.157	-160.157
	4.7	-158.297	-159.415	-157.813	-159.686	-161.267	-156.008	-158.445	-159.497	-161.771	-162.302	-161.706	-161.653	-160.089	-161.273	-160.993	-159.656				4.7	-162.88	-161.958	-159.845	-160.795	-164.115	-170.66	-167.594	-169.849	-166.565	-174.035	-169.947	-164.87	-160.916	-163.199	-157.563	-155.84				4.7	-158.549	-158.481	-157.993	-158.486	-158.3	-158.936	-160.781	-159.781
	4.8	-158.427	-158.808	-158.284	-159.245	-160.339	-156.816	-157.754	-158.71	-161.475	-162.39	-161.335	-161.276	-159.96	-160.723	-160.9	-159.889				4.8	-162.979	-161.213	-159.846	-161.587	-163.487	-171.081	-167.525	-170.628	-167.168	-174.539	-170.068	-165.4	-160.676	-163.891	-157.597	-155.366				4.8	-158.682	-158.459	-158.679	-158.733	-158.502	-159.08	-160.219	-159.219
	4.9	-158.264	-157.839	-158.697	-158.966	-159.129	-158.003	-157.568	-158.449	-161.924	-162.189	-161.584	-160.681	-159.843	-160.45	-160.502	-160.066				4.9	-163.573	-160.24	-159.696	-162.243	-163.051	-171.388	-167.894	-171.191	-168.182	-174.743	-170.005	-166.186	-160.721	-164.243	-157.584	-155.222				4.9	-158.941	-158.955	-159.163	-158.881	-159.262	-159.164	-159.998	-158.998
	5	-157.409	-157.363	-159.044	-158.535	-158.625	-158.759	-157.861	-158.529	-162.527	-161.926	-162.082	-160.247	-159.173	-160.756	-160.701	-160.122				5	-163.851	-159.522	-159.603	-162.161	-163.188	-171.701	-168.372	-170.768	-169.206	-174.422	-169.673	-166.53	-160.953	-164.402	-157.898	-155.412				5	-158.83	-159.753	-158.961	-158.831	-159.708	-159.114	-160.331	-159.331
	5.1	-156.699	-157.89	-159.342	-158.015	-158.713	-158.75	-158.185	-158.9	-162.769	-161.845	-162.23	-160.27	-158.119	-161.448	-161.174	-160.361				5.1	-163.497	-159.046	-159.524	-161.387	-163.936	-172.035	-169.13	-170.065	-169.913	-173.846	-169.362	-166.124	-161.547	-164.098	-158.525	-155.501				5.1	-158.282	-160.361	-158.501	-158.926	-159.307	-158.92	-160.807	-159.807
	5.2	-156.824	-158.793	-159.266	-158.011	-158.935	-158.356	-158.216	-159.637	-162.575	-161.994	-162.003	-160.615	-157.603	-161.8	-161.199	-160.8				5.2	-163.085	-158.432	-159.24	-160.392	-165.043	-172.184	-170.045	-169.732	-170.126	-173.348	-168.889	-165.272	-162.491	-163.173	-159.047	-155.708				5.2	-157.977	-160.572	-158.27	-159.028	-158.787	-158.819	-160.785	-159.785
	5.3	-157.206	-159.157	-158.654	-158.632	-159.244	-158.084	-158.125	-159.992	-162.251	-162.278	-161.66	-160.786	-158.093	-161.507	-161.232	-161.071				5.3	-162.888	-158.025	-158.74	-159.58	-165.927	-171.837	-170.602	-169.604	-169.835	-172.88	-168.212	-164.513	-162.986	-162.144	-158.969	-156.292				5.3	-158.357	-160.422	-158.424	-158.63	-158.869	-158.963	-160.296	-159.296
	5.4	-157.101	-158.948	-157.98	-159.414	-159.662	-157.834	-158.224	-159.32	-162.063	-162.459	-161.357	-160.663	-159.018	-161.041	-161.806	-160.861				5.4	-162.783	-158.597	-158.143	-159.153	-166.23	-170.976	-170.631	-169.435	-169.294	-172.382	-167.826	-164.05	-162.489	-161.724	-158.113	-156.741				5.4	-158.914	-160.124	-158.871	-157.886	-159.13	-159.173	-160.142	-159.142
	5.5	-156.832	-158.8	-157.733	-159.794	-159.736	-157.328	-158.563	-158.094	-162.084	-162.251	-160.969	-160.457	-159.486	-160.713	-162.582	-160.134				5.5	-162.733	-159.602	-157.812	-159.196	-165.993	-170.136	-170.562	-169.246	-168.718	-172.166	-168.007	-164.344	-161.413	-162.166	-157.029	-156.8				5.5	-159.168	-159.906	-159.177	-157.768	-158.985	-159.268	-160.677	-159.677
	5.6	-156.947	-158.864	-158.009	-159.445	-159.211	-156.924	-159.05	-157.385	-162.221	-161.564	-160.503	-160.262	-159.208	-160.322	-163.019	-159.171				5.6	-162.738	-159.832	-158.229	-159.62	-165.456	-170.052	-170.955	-169.213	-168.069	-172.475	-168.532	-165.616	-160.52	-162.759	-156.643	-156.86				5.6	-159.018	-159.675	-159.125	-158.721	-158.729	-159.182	-161.334	-160.334
	5.7	-157.358	-158.915	-158.525	-158.883	-158.525	-157.124	-159.453	-157.722	-162.203	-160.893	-160.248	-160.031	-158.61	-159.725	-162.908	-158.514				5.7	-162.794	-159.378	-159.122	-160.036	-165.093	-170.715	-171.573	-169.488	-167.276	-172.921	-169.02	-166.932	-159.943	-162.506	-157.038	-157.064				5.7	-158.622	-159.391	-158.877	-159.802	-158.783	-158.911	-161.46	-160.46
	5.8	-157.768	-159.096	-158.801	-158.975	-158.142	-157.69	-159.363	-158.676	-162.057	-161.053	-160.268	-159.668	-158.523	-159.112	-162.291	-158.403				5.8	-162.786	-159.176	-159.663	-159.987	-165.049	-171.182	-171.515	-169.794	-166.775	-172.873	-169.442	-167.563	-159.147	-161.478	-157.205	-157.21				5.8	-158.457	-159.247	-158.528	-159.94	-158.845	-158.823	-161.051	-160.051
	5.9	-157.957	-159.51	-158.757	-159.518	-158.173	-157.907	-158.772	-159.569	-162.056	-161.98	-160.384	-159.189	-159.307	-158.779	-161.688	-158.69				5.9	-162.475	-159.749	-159.519	-159.354	-165.288	-170.982	-170.602	-169.712	-167.145	-172.453	-169.922	-167.656	-158.179	-160.453	-156.661	-157.364				5.9	-158.613	-159.267	-158.188	-159.344	-158.66	-159.062	-160.446	-159.446
	6	-157.943	-159.891	-158.767	-159.706	-158.494	-157.535	-158.379	-160.128	-162.092	-162.775	-160.543	-158.654	-160.224	-158.925	-161.842	-159.17				6	-161.871	-160.873	-159.02	-158.384	-165.716	-170.604	-169.571	-169.342	-167.913	-172.458	-170.056	-167.363	-157.924	-160.031	-156.068	-157.596				6	-158.753	-159.253	-158.04	-158.902	-158.604	-159.285	-160.002	-159.002
	6.1	-158.009	-159.782	-159.011	-159.638	-158.906	-157.143	-158.459	-160.577	-161.934	-162.869	-160.7	-158.154	-160.419	-159.35	-162.503	-159.325				6.1	-161.326	-161.724	-158.544	-157.485	-165.749	-170.525	-168.932	-168.986	-168.221	-173.191	-169.507	-167.002	-158.557	-160.619	-156.037	-157.667				6.1	-158.638	-159.319	-158.099	-158.952	-158.893	-159.521	-160.032	-159.032
	6.2	-158.32	-159.125	-159.386	-159.809	-159.255	-157.216	-158.488	-161.012	-161.812	-162.443	-160.672	-157.923	-159.957	-159.69	-162.765	-158.816				6.2	-161.021	-161.94	-158.221	-157.114	-165.21	-170.987	-168.644	-168.628	-168.443	-173.796	-168.785	-166.906	-158.991	-161.918	-156.666	-157.537				6.2	-158.314	-159.652	-158.196	-159.212	-159.171	-159.772	-160.391	-159.391
	6.3	-158.635	-158.653	-159.82	-160.158	-159.45	-157.284	-158.406	-160.988	-162.051	-162.257	-160.365	-158.173	-159.388	-160.064	-162.384	-158.105				6.3	-160.907	-162.042	-158.241	-157.594	-164.51	-171.715	-168.707	-168.338	-169.122	-173.609	-168.572	-167.031	-158.611	-162.801	-157.554	-157.415				6.3	-158.002	-159.854	-158.284	-159.461	-159.165	-159.668	-160.652	-159.652
	6.4	-158.607	-158.787	-160.045	-160.479	-159.402	-156.832	-158.724	-160.355	-162.441	-162.664	-160.003	-158.875	-158.995	-160.647	-161.565	-157.703				6.4	-160.985	-162.336	-158.658	-158.697	-163.765	-171.902	-169.169	-168.309	-169.643	-173.522	-169.082	-167.18	-158.11	-162.638	-157.827	-157.138				6.4	-157.944	-159.768	-158.533	-159.542	-159.035	-159.233	-160.557	-159.557
	6.5	-158.35	-159.127	-159.809	-160.585	-159.162	-156.183	-159.499	-159.586	-162.474	-162.984	-159.976	-159.581	-158.875	-161.081	-160.675	-157.623				6.5	-161.293	-162.442	-159.167	-159.891	-163.102	-171.261	-169.796	-168.476	-169.409	-174.151	-170.263	-167.141	-158.358	-161.84	-157.119	-156.416				6.5	-158.449	-159.931	-158.849	-159.395	-159.002	-158.973	-160.101	-159.101
	6.6	-158.198	-159.34	-159.51	-160.617	-159.021	-155.853	-160.296	-159.032	-162.08	-162.738	-160.54	-159.841	-159.18	-161.112	-160.317	-157.645				6.6	-161.772	-162.178	-159.398	-160.833	-162.966	-170.387	-170.153	-168.818	-168.759	-174.581	-171.43	-166.914	-159.46	-161.102	-156.141	-155.822				6.6	-159.409	-160.428	-158.77	-159.316	-159.347	-159.064	-159.62	-158.62
	6.7	-158.171	-159.466	-159.567	-160.831	-158.967	-156.079	-160.67	-158.733	-161.663	-162.467	-161.553	-159.774	-159.702	-160.892	-160.66	-157.778				6.7	-162.472	-161.946	-159.281	-161.216	-163.41	-170.079	-170.133	-169.52	-168.234	-173.798	-171.447	-166.825	-160.68	-160.696	-155.55	-156.191				6.7	-160.144	-160.61	-158.273	-159.385	-159.941	-159.117	-159.36	-158.36
	6.8	-158.048	-159.54	-159.799	-160.933	-158.713	-156.57	-160.571	-158.398	-161.402	-162.709	-162.248	-159.829	-159.876	-160.387	-160.976	-158.265				6.8	-163.065	-161.983	-159.02	-160.913	-163.864	-170.569	-170.049	-170.365	-168.082	-172.154	-170.116	-166.924	-161.379	-160.641	-155.316	-157.108				6.8	-160.167	-160.302	-157.778	-159.304	-159.991	-158.939	-159.207	-158.207
	6.9	-157.67	-159.483	-159.93	-160.635	-158.482	-156.817	-160.221	-157.949	-161.26	-163.109	-161.968	-160.019	-159.515	-159.535	-160.678	-158.801				6.9	-162.716	-161.844	-158.808	-160.259	-163.95	-171.372	-170.161	-170.834	-168.181	-170.957	-168.629	-166.864	-161.518	-160.883	-155.526	-157.577				6.9	-159.577	-160.144	-157.534	-159.118	-159.238	-158.794	-159.309	-158.309
	7	-157.274	-159.202	-160.027	-160.07	-158.578	-156.913	-159.695	-157.926	-161.6	-163.051	-161.089	-160.043	-159.158	-158.948	-160.126	-159.016				7	-161.614	-161.135	-158.755	-159.707	-164.06	-171.824	-170.544	-170.628	-168.091	-170.96	-167.906	-166.634	-161.258	-160.961	-156.217	-157.485				7	-158.947	-160.303	-157.585	-159.162	-158.263	-158.838	-159.943	-158.943
	7.1	-157.225	-158.866	-160.067	-159.414	-158.817	-157.174	-159.014	-158.39	-162.301	-162.468	-160.459	-159.981	-159.443	-159.192	-159.798	-159.303				7.1	-161.068	-160.326	-158.865	-159.317	-164.524	-171.711	-171.235	-170.012	-167.643	-171.831	-167.891	-166.56	-160.938	-160.602	-156.954	-157.182				7.1	-158.675	-160.148	-157.833	-159.516	-157.613	-158.9	-160.691	-159.691
	7.2	-157.374	-158.837	-159.857	-159.076	-159.074	-157.545	-158.372	-158.823	-162.308	-161.869	-160.374	-160.259	-160.252	-159.76	-159.657	-159.778				7.2	-161.382	-160.236	-159.012	-159.12	-164.788	-171.391	-171.944	-169.814	-167.136	-172.755	-168.314	-166.476	-160.565	-160.337	-157.462	-156.925				7.2	-158.553	-159.58	-158.103	-159.864	-157.474	-158.969	-160.915	-159.915
	7.3	-157.561	-159.169	-159.452	-159.281	-159.468	-157.839	-157.963	-159.052	-161.505	-161.708	-160.4	-160.919	-160.789	-159.98	-159.86	-160.058				7.3	-161.611	-161.022	-159.156	-159.444	-164.471	-171.088	-172.204	-170.357	-166.998	-173.142	-168.98	-166.138	-159.846	-160.605	-157.59	-157.092				7.3	-158.526	-159.23	-158.451	-159.755	-157.841	-159.159	-160.809	-159.809
	7.4	-158.079	-159.416	-159.21	-159.572	-159.886	-158.005	-157.622	-159.147	-161.042	-161.878	-160.16	-161.153	-160.489	-159.945	-160.499	-160.272				7.4	-161.277	-162.104	-159.398	-160.284	-164.226	-170.824	-171.949	-170.906	-167.335	-173.079	-169.888	-166.023	-159.517	-160.984	-157.263	-157.726				7.4	-158.967	-159.46	-158.898	-159.079	-158.678	-159.413	-160.828	-159.828
	7.5	-158.832	-159.291	-159.36	-159.541	-159.979	-157.868	-157.377	-159.134	-161.399	-162.048	-159.851	-160.523	-159.53	-159.802	-161.174	-160.54				7.5	-160.856	-162.751	-159.488	-161.256	-164.545	-170.767	-171.435	-170.841	-167.751	-172.954	-171.101	-166.562	-160.64	-161.025	-156.885	-158.132				7.5	-159.904	-160.02	-159.101	-158.373	-159.632	-159.666	-160.774	-159.774
	7.6	-159.236	-158.889	-159.714	-159.247	-159.64	-157.273	-157.678	-158.992	-161.973	-162.058	-159.933	-159.987	-158.814	-159.565	-161.642	-160.398				7.6	-161.067	-162.595	-159.213	-162	-164.837	-170.735	-170.977	-170.308	-167.887	-172.727	-172.116	-167.252	-162.357	-160.841	-156.679	-157.781				7.6	-160.578	-160.385	-158.92	-158.268	-160.002	-159.799	-160.363	-159.363
	7.7	-159.034	-158.372	-160.057	-158.916	-159.147	-156.573	-158.37	-158.745	-162.334	-161.934	-160.635	-160.268	-158.908	-159.287	-161.851	-159.827				7.7	-161.761	-161.929	-158.922	-162.124	-164.484	-170.375	-170.777	-169.55	-167.779	-172.335	-172.167	-167.198	-162.734	-160.72	-156.186	-157.193				7.7	-160.242	-160.413	-158.596	-158.592	-159.682	-159.791	-159.914	-158.914
	7.8	-158.566	-157.99	-160.142	-158.644	-158.973	-156.123	-159.008	-158.62	-162.632	-161.787	-161.457	-160.598	-159.249	-159.045	-161.815	-159.679				7.8	-161.912	-161.496	-158.818	-161.354	-163.827	-169.838	-170.572	-168.885	-167.651	-172.18	-171.534	-166.287	-161.685	-160.723	-155.066	-156.863				7.8	-159.26	-160.241	-158.361	-158.766	-159.401	-159.903	-159.763	-158.763
	7.9	-158.147	-157.873	-159.705	-158.343	-159.271	-155.816	-159.535	-158.986	-162.905	-161.913	-161.549	-160.194	-159.22	-159.255	-161.772	-160.064				7.9	-161.394	-161.666	-158.695	-160.089	-163.419	-169.41	-170.056	-168.764	-167.584	-172.308	-171.161	-165.413	-160.729	-161.008	-153.969	-156.529				7.9	-158.533	-159.871	-158.242	-158.641	-159.545	-160.153	-159.769	-158.769
	8	-157.608	-157.952	-158.905	-157.911	-159.69	-155.76	-159.927	-159.605	-162.685	-162.317	-161.142	-159.428	-158.91	-160.242	-161.829	-160.021				8	-161.11	-161.93	-158.426	-159.148	-163.291	-169.47	-169.442	-169.201	-167.544	-172.286	-171.022	-165.194	-160.458	-161.396	-153.553	-156.027				8	-158.322	-159.387	-158.189	-158.378	-159.706	-160.222	-159.703	-158.703
	8.1	-157.009	-158.294	-158.133	-157.629	-159.786	-156.241	-159.991	-159.709	-161.807	-162.387	-161.19	-159.071	-158.558	-161.417	-161.881	-159.411				8.1	-161.355	-161.855	-158.115	-158.979	-163.364	-170.26	-168.923	-169.947	-167.343	-172.068	-170.349	-165.432	-160.437	-161.303	-153.528	-155.617				8.1	-158.389	-159.103	-158.288	-158.165	-159.724	-160.109	-159.513	-158.513
	8.2	-156.932	-159.051	-157.601	-157.935	-159.41	-156.94	-159.598	-159.276	-160.785	-162.01	-161.879	-159.344	-158.235	-161.977	-161.925	-159.058				8.2	-161.698	-161.9	-158.003	-159.44	-163.535	-171.191	-168.331	-170.468	-166.669	-171.926	-169.143	-165.932	-160.266	-160.857	-153.796	-155.836				8.2	-158.514	-159.368	-158.516	-158.105	-159.967	-160.065	-159.473	-158.473
	8.3	-157.584	-159.996	-157.134	-158.596	-158.772	-157.19	-159.109	-159.058	-160.167	-162	-162.686	-159.877	-158.089	-162.053	-162.054	-159.162				8.3	-162.085	-162.179	-158.226	-160.058	-163.685	-171.484	-167.913	-170.129	-165.832	-172.033	-168.327	-166.729	-159.737	-160.726	-154.884	-156.776				8.3	-158.613	-160.083	-158.744	-158.176	-160.424	-160.134	-160.012	-159.012
	8.4	-158.518	-160.402	-156.636	-158.886	-158.294	-156.805	-159.092	-159.385	-160.369	-162.546	-162.796	-160.238	-158.372	-162.029	-162.427	-159.182				8.4	-162.702	-162.124	-158.452	-160.211	-164.167	-171.209	-168.284	-169.16	-165.867	-172.316	-168.251	-167.702	-159.277	-160.973	-156.47	-157.479				8.4	-158.753	-160.685	-158.773	-158.459	-160.686	-160.212	-160.919	-159.919
	8.5	-159.167	-160.06	-156.701	-158.74	-158.363	-156.222	-159.464	-159.625	-161.299	-162.799	-161.856	-160.278	-159.054	-161.67	-162.918	-159.028				8.5	-163.11	-162.02	-158.518	-159.663	-164.965	-170.946	-169.411	-168.395	-167.028	-172.596	-168.11	-168.344	-159.375	-161.346	-157.426	-157.274				8.5	-159.025	-160.781	-158.631	-159.031	-160.713	-159.901	-161.425	-160.425
	8.6	-159.217	-159.429	-157.69	-158.837	-158.833	-156.124	-159.726	-159.208	-162.108	-162.483	-160.737	-160.202	-159.711	-160.777	-162.932	-159.169				8.6	-162.786	-162.502	-158.669	-158.785	-165.43	-170.728	-170.574	-168.381	-168.245	-172.899	-167.646	-168.18	-159.687	-161.664	-157.595	-156.85				8.6	-159.378	-160.29	-158.798	-159.64	-160.604	-158.968	-161.325	-160.325
	8.7	-158.801	-158.807	-158.888	-159.3	-158.921	-156.507	-159.593	-158.786	-162.263	-162.297	-160.407	-160.448	-159.872	-159.684	-162.162	-159.641				8.7	-162.206	-162.976	-158.835	-158.049	-165.555	-170.317	-171.053	-169.114	-168.593	-173.224	-167.654	-167.443	-160.044	-161.641	-157.585	-156.721				8.7	-159.605	-159.777	-159.332	-159.91	-160.326	-158.131	-161.104	-160.104
	8.8	-158.238	-158.328	-159.418	-159.745	-158.418	-156.606	-159.074	-159.055	-162.002	-162.633	-160.786	-160.892	-159.403	-158.933	-161.07	-159.959				8.8	-162.043	-162.761	-158.613	-158.061	-165.579	-169.827	-170.535	-170.061	-168.457	-173.356	-168.226	-166.653	-160.858	-161.479	-157.587	-156.496				8.8	-159.384	-160.008	-159.686	-159.685	-160.134	-158.104	-161.04	-160.04
	8.9	-157.67	-158.046	-159.143	-160.155	-158.084	-156.354	-158.573	-159.49	-161.72	-162.917	-161.316	-161.046	-158.638	-158.781	-160.394	-159.843				8.9	-162.061	-162.134	-157.94	-159.104	-165.354	-169.55	-169.383	-170.603	-168.572	-173.191	-168.749	-166.064	-162.189	-161.523	-157.526	-156.243				8.9	-158.8	-160.587	-159.743	-159.105	-160.15	-158.641	-161.019	-160.019
	9	-157.358	-157.89	-158.536	-160.346	-158.537	-156.376	-158.683	-159.35	-161.687	-162.548	-161.513	-161.01	-158.057	-159.183	-160.404	-159.279				9	-162.134	-161.473	-157.579	-160.513	-165.144	-169.742	-168.593	-170.464	-168.554	-172.877	-169.183	-165.703	-163.39	-161.468	-157.342	-156.4				9	-158.437	-160.521	-159.856	-158.613	-160.021	-159.057	-160.997	-159.997
	9.1	-157.661	-157.857	-158.191	-159.986	-159.401	-156.636	-159.318	-158.79	-162.043	-161.985	-161.178	-161.154	-157.967	-159.919	-160.884	-158.69				9.1	-162.565	-160.936	-158.137	-161.306	-165.337	-170.297	-168.789	-169.776	-167.67	-172.783	-169.668	-165.641	-164.067	-160.998	-156.796	-156.796				9.1	-158.352	-159.933	-160.104	-158.336	-159.575	-159.239	-161.059	-160.059
	9.2	-158.566	-157.88	-158.36	-159.419	-159.831	-156.737	-159.625	-158.503	-162.514	-162.026	-160.475	-161.482	-158.377	-160.476	-161.459	-158.715				9.2	-162.917	-160.666	-159.246	-161.066	-165.679	-170.635	-169.504	-169.131	-166.335	-173.159	-169.962	-165.902	-164.716	-160.541	-155.837	-157.14				9.2	-158.119	-159.592	-160.368	-157.832	-159.131	-159.596	-161.072	-160.072
	9.3	-159.451	-157.971	-158.687	-159.244	-159.579	-156.754	-159.226	-158.573	-162.482	-162.43	-159.806	-161.722	-158.9	-160.431	-161.898	-159.104				9.3	-162.686	-160.732	-160.295	-160.201	-165.862	-170.624	-169.884	-169.225	-165.52	-173.671	-170.111	-165.945	-165.556	-160.592	-155.073	-157.592				9.3	-157.726	-159.511	-160.535	-157.179	-158.955	-160.057	-160.809	-159.809
	9.4	-159.567	-158.322	-158.806	-159.485	-159.037	-156.843	-158.821	-158.476	-162.007	-162.489	-159.606	-161.685	-159.233	-160.083	-162.183	-159.094				9.4	-162.123	-161.054	-160.644	-159.508	-165.892	-170.837	-169.352	-170.227	-165.69	-174.087	-170.501	-165.061	-165.688	-160.817	-155.204	-157.905				9.4	-157.26	-159.216	-160.25	-157.247	-159.034	-160.12	-160.492	-159.492
	9.5	-158.872	-159.059	-158.871	-159.879	-158.62	-157.028	-158.946	-158.145	-161.8	-162.31	-160.115	-161.325	-159.541	-159.916	-162.099	-158.769				9.5	-161.359	-161.36	-159.994	-159.529	-165.814	-171.104	-168.039	-171.521	-166.655	-174.511	-170.677	-163.567	-164.338	-160.857	-156.013	-157.534				9.5	-156.861	-158.894	-159.371	-158.287	-159.271	-159.681	-160.549	-159.549
	9.6	-158.005	-160.064	-158.851	-160.194	-158.472	-157.392	-159.255	-158.044	-161.661	-162.454	-161.01	-160.64	-160.048	-159.866	-161.587	-158.767				9.6	-160.397	-161.572	-159.037	-160.198	-165.706	-170.591	-167.143	-172.187	-167.653	-174.71	-169.703	-162.578	-162.245	-160.769	-156.765	-157.013				9.6	-156.915	-159.25	-158.398	-159.315	-159.486	-159.317	-160.982	-159.982
	9.7	-157.563	-160.738	-158.736	-160.151	-158.523	-157.713	-159.288	-158.317	-160.806	-162.774	-161.299	-159.811	-160.355	-159.877	-161.348	-159.224				9.7	-159.526	-161.974	-158.789	-160.702	-165.432	-169.685	-167.396	-172.031	-167.978	-174.211	-168.187	-162.452	-160.766	-160.511	-157.207	-157.096				9.7	-157.452	-160.316	-157.848	-159.314	-159.604	-159.393	-161.541	-160.541
	9.8	-157.79	-160.432	-158.976	-159.634	-158.463	-157.711	-159.016	-158.549	-159.712	-162.715	-160.67	-159.217	-160.04	-160.105	-161.869	-159.587				9.8	-158.991	-162.443	-159.386	-160.339	-164.872	-169.686	-168.235	-171.558	-167.839	-173.011	-167.905	-162.601	-160.363	-160.141	-157.516	-157.212				9.8	-158.149	-161.122	-157.807	-158.427	-159.668	-159.474	-161.741	-160.741
	9.9	-158.311	-159.601	-159.552	-158.927	-158.179	-157.513	-158.458	-158.369	-159.49	-162.141	-160.15	-159.113	-159.583	-160.485	-162.612	-159.451				9.9	-159.059	-162.624	-160.149	-159.629	-164.4	-170.581	-169.144	-170.914	-167.977	-172.183	-168.95	-162.574	-160.435	-159.987	-157.771	-156.766				9.9	-158.837	-160.965	-158.099	-157.806	-159.758	-159.243	-161.204	-160.204
	10	-158.425	-159.258	-159.78	-158.456	-158.051	-157.164	-157.879	-158.129	-160.207	-161.482	-160.36	-159.407	-159.694	-160.776	-162.969	-159.046				10	-159.954	-162.774	-160.51	-159.594	-164.324	-171.048	-169.894	-170.261	-168.648	-172.742	-169.82	-162.884	-160.158	-160.304	-157.891	-156.421				10	-159.454	-160.28	-158.574	-158.272	-159.982	-159.11	-160.412	-159.412
	10.1	-158.13	-159.373	-159.349	-158.35	-158.149	-156.608	-157.907	-158.535	-161.164	-161.27	-160.686	-159.713	-160.2	-160.8	-162.784	-158.676				10.1	-161.272	-162.964	-160.237	-160.507	-164.544	-170.394	-170.065	-170.106	-169.414	-173.811	-169.951	-164.212	-159.867	-160.984	-157.912	-156.634				10.1	-159.804	-159.793	-159.181	-159.18	-160.275	-159.26	-159.993	-158.993
	10.2	-157.865	-159.328	-158.785	-158.612	-158.232	-156.176	-158.473	-159.559	-161.884	-161.658	-160.701	-159.903	-160.415	-160.615	-162.061	-158.308				10.2	-162.029	-162.513	-159.431	-161.787	-164.955	-169.359	-169.672	-170.445	-169.88	-173.873	-169.907	-165.929	-160.335	-161.662	-157.864	-156.933				10.2	-159.847	-159.559	-159.67	-159.509	-160.428	-159.372	-160.03	-159.03
	10.3	-157.79	-159.135	-158.743	-159.256	-158.369	-156.15	-159.011	-160.283	-162.178	-162.286	-160.868	-160.361	-160.22	-160.476	-161.182	-158.002				10.3	-161.981	-161.418	-158.688	-162.461	-165.536	-169.195	-169.311	-170.512	-169.93	-173.458	-169.998	-166.933	-161.165	-162.056	-157.678	-156.973				10.3	-159.783	-159.238	-159.797	-159.259	-160.421	-159.199	-160.346	-159.346
	10.4	-157.944	-158.968	-158.963	-159.942	-158.61	-156.48	-159.38	-160.206	-161.76	-162.664	-161.451	-161.186	-160.032	-160.345	-160.846	-158.251				10.4	-161.805	-160.735	-158.765	-162.231	-166.094	-170.161	-169.439	-169.877	-169.635	-173.752	-170.146	-167.208	-161.483	-161.945	-157.434	-156.621				10.4	-159.716	-158.863	-159.745	-159.017	-160.379	-159.013	-160.504	-159.504
	10.5	-158.167	-158.727	-158.938	-160.138	-158.826	-156.986	-159.553	-159.795	-160.817	-162.552	-161.855	-161.831	-160.189	-159.975	-160.997	-159.387				10.5	-161.849	-160.953	-159.409	-161.788	-166.186	-171.266	-170.088	-169.058	-169.35	-174.298	-170.057	-167.075	-161.397	-161.391	-157.294	-155.726				10.5	-159.537	-158.733	-159.833	-159.057	-160.221	-159.288	-160.424	-159.424
	10.6	-158.153	-158.393	-158.841	-159.826	-158.955	-157.054	-159.352	-159.594	-160.26	-161.962	-161.577	-161.922	-160.761	-159.784	-161.093	-160.654				10.6	-161.737	-161.406	-159.414	-161.485	-165.74	-171.613	-170.718	-168.458	-169.286	-174.321	-169.757	-166.636	-161.644	-161.077	-157.376	-154.845				10.6	-159.057	-158.987	-160.052	-159.124	-159.762	-159.938	-160.434	-159.434
	10.7	-158.124	-158.284	-158.82	-159.495	-159.005	-156.387	-158.845	-159.565	-160.432	-161.345	-161.073	-161.848	-161.357	-160.073	-161.315	-160.992				10.7	-161.267	-161.379	-158.532	-161.071	-165.123	-171.243	-170.607	-168.024	-169.133	-173.871	-169.777	-166.274	-162.176	-161.411	-157.571	-154.758				10.7	-158.3	-159.564	-160.114	-158.772	-159.252	-160.403	-160.389	-159.389
	10.8	-158.542	-158.825	-158.739	-159.342	-159.126	-155.762	-158.368	-159.319	-160.852	-161.381	-161.057	-161.87	-161.539	-160.383	-161.883	-160.525				10.8	-160.798	-161.044	-157.676	-160.621	-164.647	-170.708	-170.005	-168.039	-168.72	-173.243	-170.091	-166.307	-161.887	-161.594	-157.407	-155.277				10.8	-157.543	-160.198	-159.667	-158.246	-159.267	-160.376	-160.07	-159.07
	10.9	-159.078	-159.643	-158.748	-159.331	-159.338	-155.66	-158.269	-158.792	-161.066	-161.992	-161.406	-161.572	-161.317	-160.492	-162.398	-160.103				10.9	-160.727	-160.892	-157.464	-160.137	-164.525	-170.296	-169.578	-168.585	-168.568	-172.75	-170.228	-166.691	-160.604	-160.797	-157.034	-155.894				10.9	-157.281	-160.567	-158.75	-158.169	-159.867	-159.972	-159.684	-158.684
	11	-159.067	-160.019	-159.066	-159.329	-159.342	-155.833	-158.524	-158.341	-160.898	-162.354	-161.553	-160.938	-160.919	-160.526	-162.495	-160.153				11	-161.134	-160.966	-157.865	-159.502	-164.676	-169.861	-169.339	-169.097	-168.898	-172.565	-170.222	-166.876	-159.578	-159.653	-157.045	-156.367				11	-157.614	-160.55	-158.136	-158.475	-160.398	-159.468	-159.44	-158.44
	11.1	-158.706	-159.89	-159.516	-159.009	-159.011	-156.411	-158.591	-158.149	-160.579	-162.031	-161.318	-160.612	-160.471	-160.339	-162.104	-160.559				11.1	-161.799	-161.262	-158.553	-159.072	-164.788	-169.29	-169.168	-169.5	-169.078	-172.647	-170.304	-166.327	-159.254	-159.461	-157.129	-156.76				11.1	-158.086	-160.17	-158.445	-158.619	-160.343	-159.126	-159.533	-158.533
	11.2	-158.412	-159.558	-159.754	-158.519	-158.553	-157.421	-158.228	-158.132	-160.45	-161.523	-161.012	-160.813	-160.022	-159.957	-161.511	-160.905				11.2	-162.348	-161.892	-159.03	-159.193	-164.733	-168.877	-169.381	-170.148	-168.886	-172.968	-170.33	-165.719	-159.115	-160.348	-157.03	-157.266				11.2	-158.359	-159.497	-159.383	-158.596	-159.934	-158.911	-160.171	-159.171
	11.3	-157.983	-159.339	-159.67	-158.492	-158.142	-158.305	-157.73	-158.246	-160.438	-161.602	-160.926	-160.792	-159.57	-159.585	-161.328	-160.837				11.3	-162.372	-162.662	-158.972	-159.608	-164.56	-169.056	-170.001	-170.689	-168.615	-173.383	-170.031	-165.929	-159.156	-161.457	-157.239	-157.312				11.3	-158.366	-158.738	-160.142	-158.822	-159.655	-158.668	-161.098	-160.098
	11.4	-157.376	-159.406	-159.45	-158.891	-157.958	-158.527	-157.378	-158.479	-160.417	-162.146	-161.049	-160.086	-159.084	-159.189	-161.676	-160.349				11.4	-161.819	-163.136	-158.518	-159.79	-164.276	-169.576	-170.298	-170.757	-168.127	-173.53	-169.46	-166.438	-159.682	-162.036	-157.698	-156.312				11.4	-158.244	-158.142	-160.414	-159.132	-159.662	-158.446	-161.782	-160.782
	11.5	-156.86	-159.452	-159.261	-159.157	-158.153	-158.15	-157.258	-158.709	-160.74	-162.479	-161.294	-159.559	-158.666	-158.768	-161.946	-159.714				11.5	-161.229	-162.804	-158.056	-159.364	-164.057	-169.643	-169.807	-170.828	-167.205	-173.07	-169.16	-166.617	-160.586	-161.82	-158.083	-154.964				11.5	-158.16	-158.054	-160.464	-159.026	-159.698	-158.287	-162.013	-161.013
	11.6	-156.732	-159.328	-159.159	-159.28	-158.807	-157.824	-157.296	-158.895	-161.63	-162.43	-161.494	-159.842	-158.37	-158.411	-161.897	-159.46				11.6	-160.89	-161.715	-157.99	-158.363	-164.231	-169.043	-168.946	-171.278	-166.322	-172.228	-169.43	-166.673	-161.583	-161.49	-158.492	-154.646				11.6	-158.158	-158.501	-160.334	-158.591	-159.564	-158.13	-161.816	-160.816
	11.7	-157.258	-159.378	-159.138	-159.551	-159.848	-157.814	-157.33	-159.26	-162.428	-162.355	-161.447	-160.269	-158.274	-158.235	-161.833	-159.748				11.7	-160.555	-160.563	-158.357	-157.48	-164.754	-168.517	-168.276	-171.529	-166.176	-171.482	-169.793	-166.61	-162.395	-161.82	-158.529	-155.884				11.7	-158.346	-158.779	-159.854	-158.313	-159.592	-157.94	-161.361	-160.361
	11.8	-158.214	-159.454	-158.806	-159.901	-161.034	-157.59	-157.498	-159.772	-162.354	-162.589	-161.282	-160.346	-158.559	-158.345	-161.746	-159.955				11.8	-160.386	-159.987	-158.849	-157.583	-165.108	-168.657	-168.013	-171.13	-166.652	-171.19	-169.54	-166.185	-162.69	-162.26	-157.629	-157.59				11.8	-158.614	-158.573	-159.204	-158.421	-160.115	-157.808	-161.135	-160.135
	11.9	-158.684	-159.181	-157.997	-160.029	-162.022	-156.985	-158.25	-160.196	-161.745	-162.931	-161.196	-160.433	-159.269	-158.734	-161.587	-160.003				11.9	-160.755	-160.255	-159.433	-158.611	-165.225	-169.186	-168.026	-170.564	-167.177	-171.379	-168.547	-165.451	-162.431	-161.989	-156.376	-158.301				11.9	-158.589	-158.315	-158.824	-158.752	-160.848	-158.039	-161.357	-160.357
	12	-158.173	-158.865	-157.335	-159.771	-162.285	-156.806	-159.109	-160.363	-161.557	-162.95	-160.993	-160.597	-160.143	-159.426	-161.631	-160.547				12	-161.378	-161.047	-159.96	-159.653	-165.488	-169.908	-168.025	-170.206	-167.63	-171.552	-167.515	-164.996	-161.905	-161.28	-155.458	-158.044				12	-158.213	-158.197	-158.804	-158.945	-161.244	-158.581	-161.686	-160.686
	12.1	-157.211	-158.956	-157.31	-159.331	-161.745	-157.448	-159.024	-160.204	-161.889	-162.856	-160.576	-160.327	-160.677	-160.403	-161.699	-161.239				12.1	-161.562	-161.909	-160.005	-159.907	-165.725	-170.963	-168.006	-169.893	-167.962	-171.397	-167.119	-165.637	-161.312	-160.954	-154.844	-157.642				12.1	-157.815	-158.106	-158.952	-158.759	-161.008	-158.899	-161.776	-160.776
	12.2	-156.603	-159.359	-157.784	-159.26	-161.038	-158.043	-158.22	-160.081	-161.998	-163.18	-160.269	-159.579	-160.448	-161.244	-161.312	-161.181				12.2	-161.042	-162.751	-159.588	-159.297	-165.482	-172.041	-168.182	-169.699	-167.888	-171.256	-167.348	-166.935	-160.839	-161.111	-154.758	-157.195				12.2	-157.701	-158.193	-159.186	-158.373	-160.398	-159.06	-161.636	-160.636
	12.3	-156.718	-159.674	-158.323	-159.676	-160.473	-158.019	-157.668	-160.301	-161.647	-163.677	-160.319	-159.058	-159.64	-161.341	-160.867	-160.715				12.3	-160.24	-163.269	-159.02	-158.503	-164.831	-172.667	-168.725	-169.853	-167.49	-171.546	-168.015	-167.325	-160.729	-161.204	-155.362	-156.704				12.3	-158.064	-158.632	-159.344	-158.122	-159.832	-159.528	-161.479	-160.479
	12.4	-157.319	-159.617	-158.601	-159.936	-159.89	-157.765	-157.66	-160.586	-161.303	-163.594	-160.525	-159.209	-158.951	-160.729	-161.114	-160.551				12.4	-159.894	-163.114	-158.623	-158.231	-164.472	-172.645	-169.586	-170.389	-167.004	-172.272	-168.894	-166.427	-160.936	-161.356	-156.317	-156.673				12.4	-158.628	-159.047	-159.099	-158.013	-159.358	-160.138	-161.371	-160.371
	12.5	-157.824	-159.179	-158.789	-159.523	-159.288	-157.52	-157.959	-160.714	-161.229	-162.82	-160.558	-159.569	-158.701	-160.176	-161.69	-160.373				12.5	-160.301	-162.586	-158.754	-158.516	-164.804	-172.022	-170.225	-171.132	-166.358	-173.023	-169.631	-165.405	-161.205	-162.208	-157.233	-157.177				12.5	-158.937	-159.236	-158.548	-157.983	-158.939	-160.411	-161.219	-160.219
	12.6	-157.784	-158.602	-159.181	-158.806	-158.705	-157.393	-158.085	-160.541	-161.237	-162.025	-160.379	-159.578	-158.773	-160.201	-161.708	-159.901				12.6	-161.077	-162.131	-159.209	-159.057	-164.929	-171.157	-169.949	-171.472	-165.744	-173.173	-170.135	-164.992	-161.403	-163.203	-157.361	-157.552				12.6	-159.176	-159.609	-158.432	-158.193	-158.623	-160.336	-161.08	-160.08
	12.7	-157.421	-158.252	-159.558	-158.583	-158.181	-157.665	-157.87	-160.018	-161.223	-161.694	-160.358	-159.373	-159.129	-160.473	-161.157	-159.536				12.7	-161.676	-161.828	-159.294	-159.646	-164.14	-170.693	-168.862	-171.043	-165.571	-172.679	-170.442	-165.075	-161.528	-163.07	-156.54	-157.315				12.7	-159.619	-160.169	-159.152	-158.403	-158.513	-160.16	-161.139	-160.139
	12.8	-157.257	-158.559	-159.371	-159.104	-158.08	-158.032	-157.812	-159.821	-161.371	-161.607	-160.803	-159.354	-159.534	-160.416	-160.747	-159.452				12.8	-161.382	-161.582	-159.09	-160.161	-163.233	-170.888	-167.918	-170.25	-165.899	-172.27	-170.683	-165.454	-161.555	-162.311	-155.836	-156.525				12.8	-159.943	-160.368	-159.989	-158.311	-158.681	-159.9	-161.231	-160.231
	12.9	-157.456	-159.305	-158.743	-159.729	-158.771	-157.847	-158.084	-160.363	-161.514	-161.382	-161.351	-159.388	-159.574	-160.003	-160.765	-159.547				12.9	-159.848	-161.227	-159.259	-160.596	-163.004	-171.171	-167.743	-169.51	-166.454	-172.409	-170.932	-165.868	-161.627	-162.514	-155.88	-155.781				12.9	-159.848	-160.054	-160.146	-158.464	-158.859	-159.548	-161.204	-160.204
	13	-157.888	-159.43	-158.363	-159.985	-159.955	-157.4	-158.214	-160.685	-161.141	-161.156	-161.497	-159.058	-159.271	-159.579	-160.894	-159.865				13	-158.256	-160.837	-159.659	-160.775	-163.149	-171.129	-168.21	-168.814	-166.54	-172.845	-171.181	-166.009	-161.798	-163.624	-156.365	-155.889				13	-159.558	-159.742	-159.839	-159.11	-158.948	-159.215	-161.263	-160.263
	13.1	-158.4	-158.713	-158.338	-160.11	-160.755	-157.484	-158.163	-160.019	-160.426	-161.271	-161.265	-158.34	-159.02	-159.418	-160.991	-160.16				13.1	-157.99	-160.799	-159.873	-160.431	-163.389	-171.019	-169.041	-168.379	-165.975	-173.362	-171.482	-166.053	-161.702	-164.068	-156.908	-156.625				13.1	-159.299	-159.795	-159.823	-159.624	-159.298	-158.912	-161.247	-160.247
	13.2	-158.744	-158.199	-158.363	-159.971	-160.58	-157.839	-158.42	-159.14	-159.938	-161.714	-161.087	-157.578	-158.903	-159.617	-161.154	-160.09				13.2	-159.003	-161.211	-160.2	-159.565	-163.73	-171.079	-169.797	-168.705	-165.728	-173.917	-171.683	-166.551	-161.31	-163.364	-156.988	-157.054				13.2	-158.853	-159.921	-160.277	-159.761	-159.913	-158.832	-160.646	-159.646
	13.3	-158.674	-158.447	-158.6	-159.232	-159.748	-157.761	-158.981	-158.998	-159.649	-162.243	-161.151	-157.309	-158.618	-160.145	-161.18	-159.826				13.3	-160.445	-161.729	-160.66	-158.603	-163.792	-171.045	-169.902	-169.555	-166.51	-174.094	-171.703	-167.289	-160.836	-162.289	-156.174	-156.691				13.3	-158.191	-159.699	-160.533	-159.697	-160.151	-159.092	-159.909	-158.909
	13.4	-158.601	-159.056	-159.403	-158.38	-159.322	-157.427	-159.302	-159.458	-159.566	-162.583	-161.036	-157.791	-158.177	-160.725	-160.916	-159.4				13.4	-161.619	-162.075	-160.685	-158.19	-163.482	-170.671	-169.567	-170.248	-167.785	-173.461	-171.663	-167.195	-160.123	-161.418	-154.839	-155.673				13.4	-157.644	-159.169	-160.22	-159.469	-159.542	-159.3	-160.025	-159.025
	13.5	-159.055	-159.537	-160.43	-158.155	-159.745	-157.157	-159.259	-159.795	-160.157	-162.687	-160.549	-158.669	-157.929	-160.976	-160.737	-158.952				13.5	-162.216	-162.323	-160.424	-158.32	-163.618	-170.361	-169.502	-170.506	-168.512	-172.254	-171.52	-165.972	-159.386	-161.388	-153.898	-155.04				13.5	-157.655	-158.707	-159.652	-159.106	-158.553	-159.282	-160.823	-159.823
	13.6	-159.605	-159.608	-160.905	-158.536	-160.122	-156.954	-159.297	-159.738	-161.203	-162.678	-160.206	-159.352	-158.087	-161.053	-160.83	-159.179				13.6	-162.289	-162.605	-160.663	-158.441	-164.552	-170.57	-169.744	-170.434	-168.247	-171.024	-171.05	-164.823	-159.281	-162.249	-154.089	-155.486				13.6	-158.45	-158.577	-159.158	-158.75	-158.326	-159.115	-161.384	-160.384
	13.7	-159.646	-159.238	-160.799	-158.92	-159.759	-157.07	-159.425	-159.567	-161.964	-162.49	-160.219	-159.598	-158.554	-161.228	-160.952	-159.943				13.7	-162.049	-162.693	-161.341	-158.42	-165.587	-170.962	-169.866	-170.437	-167.381	-170.17	-170.102	-164.806	-159.788	-162.791	-155.176	-156.184				13.7	-159.485	-158.63	-158.851	-158.519	-159.258	-158.674	-161.373	-160.373
	13.8	-159.289	-159.052	-160.478	-159.188	-159.164	-157.462	-159.212	-159.272	-162.339	-162.123	-160.37	-159.571	-159.125	-161.041	-161.03	-160.128				13.8	-161.675	-162.352	-161.433	-158.657	-166.092	-171.122	-169.613	-170.518	-166.52	-169.697	-168.912	-165.457	-160.337	-162.175	-156.065	-156.387				13.8	-159.857	-158.622	-158.646	-158.402	-160.368	-158.224	-161.031	-160.031
	13.9	-158.81	-159.542	-159.876	-159.588	-159.105	-157.748	-158.823	-158.614	-162.539	-161.838	-160.845	-159.572	-159.703	-160.074	-161.224	-159.435				13.9	-161.438	-161.836	-160.477	-159.359	-165.917	-171.253	-169.139	-170.25	-166.161	-169.471	-167.991	-165.729	-160.615	-160.929	-156.526	-156.233				13.9	-159.463	-158.714	-158.458	-158.38	-160.675	-158.416	-160.741	-159.741
	14	-158.267	-160.044	-159.334	-159.834	-159.53	-158.09	-158.745	-157.923	-162.527	-161.884	-161.774	-159.612	-160.179	-159.158	-161.49	-158.783				14	-161.838	-161.702	-159.268	-159.963	-165.134	-171.45	-169.105	-169.618	-166.511	-169.832	-167.433	-165.563	-160.548	-160.076	-157.071	-155.862				14	-159.021	-158.901	-158.463	-158.521	-160.317	-159.202	-160.797	-159.797
	14.1	-157.802	-159.837	-159.349	-159.52	-159.836	-158.528	-158.635	-157.74	-162.02	-162.168	-162.477	-159.377	-160.468	-159.158	-161.653	-158.716				14.1	-162.826	-162.381	-158.786	-159.61	-164.215	-171.349	-169.723	-168.935	-167.135	-170.752	-167.155	-165.886	-160.082	-160.279	-157.562	-155.673				14.1	-158.885	-158.726	-158.727	-158.872	-159.931	-159.864	-161.291	-160.291
	14.2	-157.612	-159.136	-159.451	-158.659	-159.898	-158.283	-158.068	-158.138	-161.011	-162.44	-162.381	-158.894	-160.734	-159.641	-161.779	-158.776				14.2	-163.655	-163.373	-159.018	-158.503	-163.806	-171.073	-170.319	-168.665	-167.267	-171.499	-167.179	-166.902	-159.577	-161.49	-157.597	-156.352				14.2	-158.865	-158.11	-159.152	-159.192	-159.789	-160.071	-162	-161
	14.3	-157.78	-158.498	-159.107	-157.801	-160.143	-157.158	-157.547	-158.879	-160.205	-162.541	-161.844	-158.673	-161.013	-160.034	-162.05	-158.917				14.3	-163.778	-163.609	-159.385	-157.839	-163.982	-170.992	-170.399	-168.955	-166.615	-171.932	-167.315	-167.542	-159.608	-162.956	-157.372	-157.572				14.3	-158.84	-157.697	-159.605	-159.163	-159.867	-159.801	-162.454	-161.454
	14.4	-158.255	-158.335	-158.51	-157.726	-160.633	-156.235	-157.592	-159.612	-160.245	-162.499	-161.325	-159.051	-160.909	-160.394	-162.241	-159.642				14.4	-163.02	-162.906	-159.531	-158.207	-164.139	-170.712	-170.127	-169.332	-165.767	-172.427	-167.501	-167.159	-160.028	-163.682	-157.492	-158.037				14.4	-158.768	-158.173	-159.813	-158.8	-160.029	-159.124	-162.514	-161.514
	14.5	-158.844	-158.61	-157.906	-158.513	-160.569	-156.332	-157.941	-159.868	-160.965	-162.365	-160.752	-159.608	-160.286	-160.611	-161.662	-160.688				14.5	-161.88	-161.935	-159.567	-159.271	-164.011	-170.116	-169.941	-169.699	-165.565	-173.014	-167.825	-166.63	-160.335	-163.326	-157.993	-157.501				14.5	-158.585	-159.182	-159.774	-158.319	-159.904	-158.599	-162.334	-161.334
	14.6	-159.13	-158.824	-157.748	-159.291	-159.766	-156.979	-158.155	-159.681	-161.681	-162.09	-159.98	-159.717	-159.756	-160.482	-160.166	-161.266				14.6	-161.389	-161.293	-159.808	-160.534	-163.894	-169.735	-169.954	-170.3	-166.209	-173.264	-168.108	-167.056	-160.501	-162.519	-158.142	-157.033				14.6	-158.305	-159.704	-159.839	-158.074	-159.42	-158.761	-161.968	-160.968
	14.7	-158.757	-158.709	-158.296	-159.583	-159.209	-157.324	-158.411	-159.624	-161.924	-162.051	-159.261	-159.418	-159.845	-160.414	-158.792	-161.234				14.7	-161.693	-161.161	-159.957	-161.262	-163.922	-169.66	-169.908	-170.773	-167.215	-173.02	-168.47	-168.086	-160.552	-161.855	-157.731	-157.258				14.7	-158.03	-159.541	-159.957	-158.277	-159.063	-159.257	-161.579	-160.579
	14.8	-157.987	-158.737	-158.921	-159.761	-159.35	-157.361	-159.004	-159.863	-161.957	-162.612	-158.944	-159.298	-160.216	-160.843	-158.513	-161.063				14.8	-162.221	-161.486	-159.601	-160.898	-163.934	-169.703	-169.76	-170.765	-167.908	-172.935	-169.109	-168.219	-160.343	-161.534	-157.552	-157.616				14.8	-157.749	-159.205	-159.754	-158.882	-159.345	-159.38	-161.271	-160.271
	14.9	-157.363	-159.397	-159.188	-159.88	-159.624	-157.642	-159.564	-160.089	-162.04	-163.267	-159.108	-159.871	-160.248	-161.402	-159.298	-161.105				14.9	-162.776	-161.935	-159.024	-159.882	-163.735	-169.972	-169.588	-170.537	-167.963	-173.323	-169.608	-166.932	-159.766	-161.611	-158.094	-157.488				14.9	-157.461	-159.157	-159.356	-159.564	-160.14	-158.872	-160.976	-159.976
	15	-157.151	-160.218	-159.259	-159.656	-159.58	-158.188	-159.529	-160.308	-161.744	-163.655	-159.716	-160.884	-159.885	-161.343	-160.516	-161.258				15	-163.1	-162.031	-158.422	-159.289	-163.271	-170.495	-169.503	-170.575	-167.702	-173.732	-169.732	-165.708	-158.789	-161.623	-158.561	-157.201				15	-157.547	-159.582	-159.084	-159.926	-160.718	-157.917	-160.833	-159.833
	15.1	-157.359	-160.473	-159.201	-159.324	-159.342	-158.36	-158.868	-160.76	-160.999	-164.023	-160.557	-161.522	-159.417	-160.345	-161.6	-161.035				15.1	-162.748	-161.788	-157.928	-159.495	-162.766	-170.969	-169.656	-170.994	-167.552	-173.932	-169.794	-165.992	-157.83	-161.202	-157.827	-157.386				15.1	-158.297	-160.008	-158.777	-159.975	-160.691	-157.026	-160.87	-159.87
	15.2	-157.745	-160.126	-159.113	-159.236	-159.385	-157.832	-157.958	-161.328	-160.497	-164.184	-161.352	-161.356	-158.981	-159.196	-162.257	-160.277				15.2	-161.978	-161.453	-158.149	-159.902	-162.671	-170.917	-169.745	-171.525	-167.49	-173.923	-169.703	-167.124	-157.556	-160.83	-156.077	-157.86				15.2	-159.329	-159.77	-158.301	-159.96	-160.246	-156.839	-160.712	-159.712
	15.3	-157.922	-159.567	-159.412	-159.327	-159.947	-157.264	-157.257	-161.59	-160.6	-163.628	-161.731	-160.676	-158.644	-159.002	-162.353	-159.551				15.3	-161.591	-161.014	-159.374	-160.013	-163.129	-170.285	-169.476	-171.731	-167.547	-173.566	-169.24	-167.817	-158.09	-160.864	-154.769	-157.929				15.3	-159.93	-159.173	-158.179	-159.859	-159.632	-157.588	-160.277	-159.277
	15.4	-157.987	-159.327	-160.136	-159.349	-160.594	-157.218	-156.875	-161.326	-161.077	-162.539	-161.478	-160.192	-158.663	-159.634	-162.054	-159.486				15.4	-161.75	-160.544	-160.831	-159.72	-163.945	-169.805	-169.375	-171.193	-167.881	-173.056	-169	-167.849	-159.147	-161.094	-154.887	-157.647				15.4	-159.866	-158.871	-158.829	-159.51	-159.17	-158.709	-160.07	-159.07
	15.5	-158.339	-159.528	-160.68	-159.22	-160.499	-157.553	-156.696	-160.8	-161.76	-161.791	-161.255	-160.193	-159.115	-160.24	-161.742	-160.132				15.5	-162.064	-160.024	-161.187	-159.072	-164.864	-170.037	-170.049	-170.241	-168.221	-172.837	-169.464	-167.222	-160.408	-161.187	-155.956	-157.046				15.5	-159.346	-158.94	-159.691	-158.958	-159.354	-159.321	-160.319	-159.319
	15.6	-158.701	-159.547	-160.559	-158.892	-159.432	-157.977	-157.011	-160.409	-162.371	-161.858	-161.728	-160.187	-159.683	-160.634	-161.542	-160.879				15.6	-162.091	-159.393	-160.352	-158.336	-165.557	-170.729	-171.214	-169.742	-168.186	-172.852	-169.964	-165.967	-161.403	-161.033	-156.741	-155.835				15.6	-158.617	-159.123	-159.94	-158.623	-160.157	-159.225	-160.687	-159.687
	15.7	-158.301	-159.03	-159.955	-158.431	-158.24	-158.201	-157.92	-160.17	-162.583	-162.143	-162.334	-159.862	-159.964	-161.062	-161.348	-161.022				15.7	-161.394	-159.059	-159.334	-157.834	-165.814	-171.405	-171.782	-169.77	-167.802	-172.719	-169.707	-165.027	-161.559	-161.125	-156.548	-154.707				15.7	-157.855	-158.994	-159.599	-158.94	-160.746	-159.238	-160.97	-159.97
	15.8	-157.103	-158.265	-159.42	-158.406	-157.886	-158.059	-158.778	-159.98	-162.45	-161.969	-162.519	-159.543	-159.68	-161.527	-161.487	-160.631				15.8	-160.528	-159.577	-158.612	-157.852	-165.894	-171.628	-171.106	-169.872	-167.243	-172.255	-169.011	-165.482	-160.859	-161.827	-155.699	-154.28				15.8	-157.221	-158.532	-159.263	-159.492	-160.459	-159.955	-160.975	-159.975
	15.9	-156.164	-157.49	-159.272	-158.937	-158.545	-157.713	-158.947	-159.747	-162.29	-161.819	-162.668	-159.587	-158.989	-161.826	-162.185	-160.309				15.9	-160.65	-160.638	-158.269	-158.436	-166.003	-171.379	-170.089	-169.964	-166.739	-171.537	-169.027	-167.018	-160.111	-162.847	-154.97	-154.088				15.9	-156.972	-158.503	-159.274	-159.451	-159.75	-160.752	-160.462	-159.462
	16	-156.476	-156.864	-159.243	-159.048	-159.63	-157.492	-158.315	-159.347	-162.216	-162.2	-162.802	-160.051	-158.422	-161.979	-162.721	-160.228				16	-161.551	-161.213	-158.538	-159.335	-165.817	-171.273	-169.703	-170.062	-166.415	-170.822	-170.044	-168.483	-160.231	-163.933	-154.754	-153.901				16	-157.282	-159.11	-159.336	-159.026	-159.532	-160.85	-159.73	-158.73
	16.1	-157.694	-156.513	-158.938	-158.42	-160.622	-157.541	-157.374	-158.995	-161.911	-162.448	-162.475	-160.417	-158.388	-162.207	-162.414	-160.17				16.1	-161.913	-161.04	-159.399	-160.189	-165.39	-171.455	-169.579	-170.255	-166.169	-170.317	-170.766	-169.137	-161.394	-164.871	-154.817	-153.995				16.1	-157.954	-159.59	-158.887	-158.754	-159.834	-160.525	-159.307	-158.307
	16.2	-158.691	-156.686	-158.502	-158.028	-161.289	-157.574	-156.977	-158.981	-161.372	-161.89	-162.009	-160.128	-158.905	-162.276	-161.656	-160.156				16.2	-161.211	-160.753	-160.434	-160.497	-165.235	-171.286	-169.174	-170.357	-166.058	-169.904	-170.416	-168.94	-162.506	-165.199	-154.834	-154.451				16.2	-158.624	-159.516	-158.032	-158.344	-160.109	-160.359	-159.231	-158.231
	16.3	-158.961	-157.609	-158.229	-158.592	-161.111	-157.067	-157.436	-159.27	-161.208	-160.961	-162.015	-159.527	-159.662	-161.737	-161.221	-160.162				16.3	-160.075	-160.712	-160.932	-160.086	-165.39	-170.766	-168.788	-169.95	-166.371	-169.667	-169.846	-168.35	-162.248	-164.649	-155.085	-155.334				16.3	-159.127	-159.249	-157.756	-157.635	-160.183	-160.118	-159.385	-158.385
	16.4	-158.654	-158.8	-158.029	-159.555	-160.085	-156.163	-158.126	-159.625	-161.498	-160.423	-162.261	-159.195	-160.264	-160.956	-161.22	-159.885				16.4	-159.407	-160.847	-160.315	-159.529	-165.321	-170.586	-168.846	-169.381	-167.119	-170.007	-169.601	-167.484	-160.728	-163.474	-155.825	-156.559				16.4	-159.39	-159.241	-158.476	-157.22	-159.919	-159.491	-159.786	-158.786
	16.5	-158.046	-159.432	-157.982	-159.876	-159.175	-155.597	-158.275	-159.735	-161.653	-160.362	-162.303	-159.213	-160.54	-160.724	-161.379	-159.199				16.5	-159.762	-161.069	-158.859	-159.373	-164.645	-170.932	-169.429	-169.126	-167.725	-170.786	-169.222	-166.244	-159.085	-162.122	-156.609	-157.16				16.5	-159.394	-159.499	-159.343	-157.467	-159.29	-158.947	-160.351	-159.351
	16.6	-157.564	-159.171	-158.378	-159.572	-158.892	-155.7	-157.887	-159.597	-161.446	-160.578	-162.259	-159.319	-160.511	-161.128	-161.654	-158.408				16.6	-161.01	-161.14	-157.598	-159.521	-163.68	-171.494	-170.327	-169.107	-167.702	-171.508	-168.825	-165.099	-158.483	-160.865	-157.017	-156.584				16.6	-159.356	-159.567	-159.712	-158.177	-158.717	-158.837	-160.977	-159.977
	16.7	-157.569	-158.396	-159.108	-159.367	-158.815	-156.163	-157.464	-159.368	-161.148	-161.003	-162.287	-159.233	-160.167	-161.763	-161.948	-158.195				16.7	-162.363	-160.771	-157.417	-159.392	-163.195	-172.064	-170.942	-169.489	-167.218	-172.016	-169.162	-164.764	-159.037	-159.974	-157.071	-155.919				16.7	-159.448	-159.273	-159.876	-159.053	-158.445	-158.852	-161.463	-160.463
	16.8	-158.001	-157.668	-159.712	-159.344	-158.735	-156.566	-157.507	-159.042	-160.89	-161.495	-162.123	-159.071	-159.708	-162.299	-162.001	-158.835				16.8	-162.959	-159.994	-158.164	-158.896	-163.617	-172.467	-170.942	-170.382	-166.723	-172.38	-170.182	-165.446	-159.585	-159.782	-157.08	-155.977				16.8	-159.657	-158.967	-160.108	-159.876	-158.371	-158.988	-161.376	-160.376
	16.9	-158.466	-157.174	-159.744	-159.095	-158.942	-156.785	-158.124	-158.699	-160.714	-161.817	-161.586	-159.152	-159.416	-162.5	-161.666	-159.637				16.9	-162.556	-159.188	-158.862	-158.795	-164.507	-172.434	-170.74	-171.342	-166.786	-172.845	-171.08	-166.585	-159.441	-160.321	-157.117	-156.027				16.9	-159.767	-158.78	-160.153	-160.419	-158.474	-159.298	-160.741	-159.741
	17	-158.638	-157.183	-159.141	-158.593	-159.405	-156.885	-158.625	-158.433	-160.73	-161.766	-160.951	-159.304	-159.232	-162.223	-161.178	-159.916				17	-161.85	-158.86	-159.098	-159.456	-165.248	-171.929	-170.743	-171.815	-167.792	-173.354	-171.53	-167.51	-159.061	-161.122	-156.991	-155.753				17	-159.524	-158.479	-159.826	-160.384	-158.78	-159.418	-160.313	-159.313
	17.1	-158.633	-158.043	-158.604	-158.281	-159.728	-157.033	-158.47	-158.47	-160.856	-161.468	-160.473	-159.309	-159.112	-161.671	-160.719	-159.941				17.1	-161.67	-159.084	-159.255	-160.174	-165.509	-171.229	-170.985	-171.483	-168.859	-173.28	-171.462	-168.049	-158.87	-161.856	-157.132	-155.933				17.1	-159.121	-158.079	-159.495	-159.764	-159.186	-159.405	-160.517	-159.517
	17.2	-158.726	-159.267	-158.894	-158.684	-159.882	-157.429	-158.081	-158.934	-160.931	-161.483	-160.22	-159.363	-159.02	-161.195	-160.273	-160.141				17.2	-162.081	-159.206	-159.351	-160.177	-164.955	-170.614	-171.367	-170.676	-168.838	-172.724	-170.935	-167.961	-159.023	-162.529	-157.758	-156.792				17.2	-158.92	-158.025	-159.41	-159.078	-159.429	-159.643	-160.806	-159.806
	17.3	-158.821	-160.014	-159.676	-159.559	-160.005	-157.89	-157.855	-159.304	-161.085	-161.926	-160.331	-159.484	-158.803	-160.895	-160.152	-160.3				17.3	-162.668	-158.859	-159.057	-159.498	-163.843	-170.137	-171.777	-169.993	-168.203	-172.475	-170.539	-166.968	-159.666	-162.75	-158.138	-157.627				17.3	-158.886	-158.472	-159.303	-158.847	-159.523	-159.943	-160.737	-159.737
	17.4	-158.741	-160.268	-160.077	-159.933	-159.778	-157.913	-157.715	-159.054	-161.406	-162.161	-160.735	-159.441	-158.529	-160.794	-160.609	-160.17				17.4	-162.759	-158.448	-158.628	-158.733	-163.159	-170.074	-171.882	-169.544	-167.897	-172.42	-170.309	-165.489	-160.519	-162.205	-158.102	-158.02				17.4	-158.927	-158.755	-158.894	-158.976	-159.774	-159.946	-160.796	-159.796
	17.5	-158.495	-160.185	-160.001	-159.471	-159.026	-157.4	-157.738	-158.478	-161.728	-161.804	-160.928	-159.152	-158.406	-161.013	-161.288	-159.97				17.5	-162.068	-158.501	-158.629	-158.455	-163.516	-170.519	-171.427	-169.41	-167.74	-172.199	-169.593	-164.465	-161.041	-161.432	-157.833	-157.948				17.5	-159.136	-158.545	-158.38	-159.161	-159.883	-159.692	-161.215	-160.215
	17.6	-158.141	-159.476	-159.89	-158.794	-158.434	-156.888	-158.207	-158.248	-161.857	-161.221	-160.708	-158.751	-158.306	-161.484	-161.754	-159.839				17.6	-161.322	-159.271	-159.292	-158.665	-164.596	-170.769	-170.481	-169.668	-167.258	-172.121	-168.601	-164.436	-161.027	-160.772	-157.088	-157.286				17.6	-159.461	-158.47	-158.398	-159.288	-159.489	-159.437	-161.551	-160.551
	17.7	-157.967	-158.334	-159.73	-158.578	-158.652	-156.984	-159.019	-158.651	-161.68	-160.936	-160.272	-158.58	-158.111	-161.659	-161.951	-159.504				17.7	-161.146	-160.677	-160.335	-158.998	-165.477	-170.407	-169.191	-169.884	-166.553	-172.43	-168.319	-164.952	-160.838	-160.269	-156.147	-156.301				17.7	-159.641	-158.907	-159.043	-159.309	-158.834	-159.466	-161.783	-160.783
	17.8	-158.19	-157.668	-159.211	-159.201	-159.607	-157.589	-159.556	-159.482	-161.321	-161	-159.964	-158.833	-158.292	-161.236	-161.664	-159.132				17.8	-161.363	-162.266	-161.151	-159.369	-165.273	-169.894	-168.077	-169.637	-166.025	-172.766	-168.788	-165.34	-160.825	-160.314	-155.68	-155.766				17.8	-159.607	-159.468	-159.519	-159.395	-158.194	-159.882	-161.914	-160.914
	17.9	-158.546	-158.026	-158.375	-160.498	-160.854	-158.126	-159.481	-160.257	-161.185	-161.175	-160.364	-159.187	-159.18	-160.723	-160.882	-159.286				17.9	-161.69	-163.308	-161.214	-159.75	-164.235	-169.64	-167.897	-169.114	-165.853	-172.503	-169.342	-165.723	-160.686	-160.535	-155.91	-155.945				17.9	-159.633	-159.614	-159.256	-159.7	-157.819	-160.424	-161.615	-160.615
	18	-158.946	-159.001	-157.66	-161.54	-161.614	-158.373	-159.005	-160.458	-161.433	-161.518	-161.554	-159.175	-160.237	-160.665	-160.382	-159.822				18	-162.181	-163.568	-160.6	-159.87	-163.517	-169.623	-168.581	-168.819	-165.971	-171.695	-169.746	-166.529	-160.104	-160.181	-156.612	-156.404				18	-159.834	-159.185	-158.779	-159.831	-157.927	-160.658	-161.116	-160.116
	18.1	-159.284	-159.714	-157.351	-161.395	-161.086	-158.511	-158.248	-160.079	-161.761	-162.184	-162.833	-158.765	-160.627	-161.053	-160.632	-160.155				18.1	-162.798	-163.338	-159.928	-159.674	-163.697	-169.76	-169.306	-169.201	-166.287	-171.063	-170.064	-167.673	-159.228	-159.702	-157.212	-156.677				18.1	-160.019	-158.492	-158.785	-159.315	-158.362	-160.426	-160.906	-159.906
	18.2	-159.112	-159.789	-157.299	-160.187	-159.613	-158.627	-157.219	-159.821	-161.861	-162.748	-163.614	-158.401	-160.225	-161.542	-161.035	-160.009				18.2	-163.04	-162.734	-159.727	-159.671	-164.397	-170.179	-169.458	-170.282	-166.724	-171.183	-170.33	-168.815	-158.448	-159.651	-157.227	-156.659				18.2	-160.107	-157.951	-159.037	-158.513	-158.765	-160.03	-160.849	-159.849
	18.3	-158.562	-159.641	-157.335	-158.862	-158.472	-158.589	-156.386	-160.007	-161.637	-162.719	-163.649	-158.498	-159.578	-161.822	-161.124	-159.732				18.3	-162.616	-162.041	-159.843	-160.248	-165.106	-170.698	-169.069	-171.345	-167.247	-172.019	-170.607	-169.303	-158.335	-159.789	-156.729	-156.539				18.3	-160.103	-157.48	-159.015	-158.273	-159.112	-159.913	-160.547	-159.547
	18.4	-158.273	-159.684	-157.608	-158.189	-158.084	-158.273	-156.56	-160.03	-161.153	-162.205	-163.08	-159.038	-159.199	-161.9	-161.046	-160.004				18.4	-161.977	-161.565	-159.576	-160.866	-165.612	-170.862	-168.704	-171.555	-167.966	-172.958	-170.746	-168.707	-158.962	-160.237	-156.495	-156.248				18.4	-159.934	-157.092	-158.696	-158.704	-159.432	-160.095	-160.138	-159.138
	18.5	-158.291	-159.93	-158.334	-158.385	-158.163	-157.76	-157.794	-159.491	-160.611	-161.583	-162.379	-159.719	-159.149	-161.818	-160.885	-160.833				18.5	-161.7	-161.005	-158.842	-160.831	-165.961	-170.895	-168.884	-170.85	-169.005	-173.54	-170.492	-167.361	-159.456	-161.133	-157.133	-155.828				18.5	-159.502	-157.391	-158.392	-159.126	-159.472	-160.121	-160.203	-159.203
	18.6	-158.095	-160.218	-159.07	-159.091	-158.674	-157.39	-159.105	-158.893	-160.273	-161.264	-161.613	-160.348	-159.278	-161.378	-160.856	-161.439				18.6	-161.963	-160.239	-158.41	-160.104	-166.065	-171.202	-169.46	-169.82	-169.838	-173.57	-169.993	-165.581	-159.362	-161.809	-158.15	-155.46				18.6	-158.789	-158.186	-158.46	-159.28	-159.301	-159.891	-160.812	-159.812
	18.7	-157.657	-160.244	-159.195	-159.789	-159.184	-157.526	-159.642	-158.628	-160.333	-161.315	-160.783	-160.799	-159.495	-160.516	-161.206	-161.209				18.7	-162.572	-159.819	-158.538	-159.233	-165.517	-171.399	-170	-168.98	-169.392	-172.884	-169.662	-163.781	-159.435	-161.902	-158.696	-154.941				18.7	-157.989	-158.554	-158.959	-159.498	-159.152	-159.945	-161.469	-160.469
	18.8	-157.624	-159.688	-158.842	-160.268	-159.118	-158.116	-159.497	-158.281	-160.872	-161.378	-160.403	-161.076	-159.68	-159.644	-161.506	-160.337				18.8	-162.982	-159.964	-158.705	-158.973	-164.492	-171.122	-170.559	-168.522	-167.707	-171.894	-169.646	-162.886	-160.158	-161.606	-158.865	-154.689				18.8	-157.571	-158.561	-159.501	-159.79	-158.877	-160.512	-161.863	-160.863
	18.9	-157.96	-158.618	-158.653	-160.344	-158.843	-158.573	-159.199	-157.701	-161.696	-161.409	-160.632	-161.294	-159.639	-159.242	-161.268	-159.525				18.9	-162.72	-160.415	-158.645	-159.652	-163.886	-170.707	-171.199	-168.53	-166.208	-171.576	-169.584	-163.372	-160.731	-160.863	-159.042	-155.676				18.9	-157.737	-158.838	-159.696	-159.92	-158.555	-160.959	-161.997	-160.997
	19	-158.124	-157.619	-159.015	-159.96	-158.912	-158.543	-158.985	-157.596	-162.105	-161.486	-161.164	-161.151	-159.264	-159.175	-160.672	-159.116				19	-161.952	-160.777	-158.529	-160.836	-163.996	-170.499	-171.598	-168.988	-165.794	-172.059	-169.237	-164.48	-160.303	-159.743	-158.774	-157.417				19	-158.073	-159.29	-159.477	-159.894	-158.685	-160.72	-161.949	-160.949
	19.1	-158.258	-157.277	-159.541	-159.54	-159.009	-158.174	-158.946	-158.422	-161.844	-161.453	-161.749	-160.426	-158.646	-159.024	-160.195	-159.051				19.1	-161.356	-160.73	-158.384	-161.794	-164.178	-170.479	-171.639	-169.355	-166.205	-172.525	-168.891	-165.237	-159.306	-158.956	-157.648	-158.562				19.1	-158.309	-159.387	-159.036	-159.671	-159.137	-160.187	-161.861	-160.861
	19.2	-158.596	-157.55	-159.635	-159.377	-158.846	-157.787	-158.983	-159.445	-161.496	-161.487	-162.191	-159.77	-157.958	-159.02	-160.202	-159.349				19.2	-161.146	-160.584	-158.345	-161.853	-164.011	-170.344	-171.301	-169.107	-166.909	-172.681	-168.603	-165.587	-158.644	-159.223	-156.327	-158.77				19.2	-158.725	-159.057	-158.679	-159.015	-159.19	-159.928	-161.621	-160.621
	19.3	-158.863	-157.934	-159.175	-159.399	-158.852	-157.715	-158.799	-159.79	-161.229	-161.787	-162.379	-159.858	-157.524	-159.636	-160.628	-159.839				19.3	-161.103	-160.934	-158.793	-160.876	-163.662	-169.824	-170.535	-168.694	-167.547	-172.893	-168.147	-165.899	-158.55	-160.006	-155.688	-158.365				19.3	-159.396	-158.746	-158.422	-158.12	-158.989	-159.765	-161.058	-160.058
	19.4	-158.773	-158.098	-158.321	-159.543	-159.378	-158.112	-158.394	-159.685	-160.929	-162.067	-162.411	-160.21	-157.441	-160.606	-160.841	-160.091				19.4	-161.374	-161.493	-159.556	-159.636	-163.607	-169.292	-169.871	-168.896	-168.024	-173.422	-167.96	-165.88	-159.2	-160.317	-155.801	-157.689				19.4	-160.146	-158.778	-158.149	-157.718	-159.269	-159.371	-160.422	-159.422
	19.5	-158.351	-158.154	-157.456	-159.852	-160.136	-158.655	-157.936	-159.703	-160.84	-162.186	-162.355	-160.155	-157.527	-161.3	-160.62	-160.003				19.5	-161.797	-161.191	-160	-159.08	-164.391	-169.49	-170.068	-169.645	-168.415	-174.247	-168.616	-165.191	-160.451	-160.375	-156.34	-157.022				19.5	-160.873	-159.012	-158.184	-158.008	-159.689	-158.975	-160.086	-159.086
	19.6	-157.711	-158.355	-157.102	-160.258	-160.42	-158.774	-157.508	-159.963	-161.006	-162.258	-162.154	-160.02	-157.873	-161.43	-160.519	-159.996				19.6	-161.81	-159.976	-159.781	-159.111	-165.667	-170.314	-170.754	-170.123	-168.494	-174.93	-169.483	-164.589	-161.126	-160.563	-156.998	-156.526				19.6	-161.271	-159.183	-158.835	-158.414	-159.37	-158.861	-160.14	-159.14
	19.7	-157.038	-158.646	-157.299	-160.322	-159.759	-158.168	-157.264	-160.35	-161.238	-162.179	-161.981	-160.094	-158.547	-161.165	-160.94	-160.178				19.7	-161.565	-159.026	-159.352	-159.037	-166.285	-170.924	-170.797	-170.061	-168.197	-174.809	-169.819	-164.686	-160.768	-160.489	-157.49	-156.362				19.7	-160.849	-159.333	-159.687	-158.73	-158.702	-158.879	-160.431	-159.431
	19.8	-156.714	-158.785	-157.543	-159.768	-158.435	-157.248	-157.302	-160.589	-161.434	-162.085	-162.063	-159.993	-159.276	-161.091	-161.53	-160.046				19.8	-161.693	-158.749	-159.302	-158.787	-165.831	-171.125	-170.248	-169.927	-168.017	-173.698	-170.042	-164.779	-160.573	-160.242	-157.587	-156.629				19.8	-159.896	-159.539	-159.995	-159.257	-158.7	-158.874	-160.59	-159.59
	19.9	-157.091	-158.988	-157.608	-159.008	-157.194	-156.715	-157.381	-160.383	-161.464	-162.366	-162.171	-159.603	-159.781	-161.708	-161.822	-159.544				19.9	-162.251	-158.95	-159.287	-158.67	-165.28	-171.404	-170.34	-169.914	-168.007	-172.304	-170.59	-164.334	-161.121	-160.459	-157.105	-157.169				19.9	-159.274	-159.624	-159.501	-159.803	-159.369	-159.185	-160.509	-159.509
	20	-158.045	-159.35	-157.695	-158.444	-156.809	-156.516	-157.425	-159.919	-161.192	-162.709	-161.856	-159.254	-159.886	-162.641	-161.79	-158.924				20	-162.877	-159.803	-158.83	-158.821	-165.413	-171.863	-171.324	-170.03	-168.034	-171.698	-170.876	-164.393	-161.634	-161.015	-156.467	-157.75				20	-159.024	-159.539	-158.55	-159.698	-160.04	-159.859	-160.466	-159.466
	20.1	-159.11	-159.385	-157.898	-158.139	-157.409	-156.277	-157.786	-159.588	-160.914	-162.46	-161.075	-159.263	-159.445	-162.897	-161.545	-158.13				20.1	-163.346	-160.886	-158.384	-159.193	-165.695	-172.06	-171.813	-170.604	-168.295	-172.159	-170.205	-165.747	-161.691	-161.243	-156.297	-158.097				20.1	-158.865	-159.337	-157.69	-158.984	-160.39	-160.165	-160.556	-159.556
	20.2	-159.999	-158.942	-158.09	-158.367	-158.39	-156.186	-158.429	-159.193	-161.087	-161.899	-160.335	-159.691	-158.641	-162.152	-161.26	-157.488				20.2	-163.582	-161.129	-158.485	-159.743	-165.707	-171.782	-171.108	-171.406	-168.716	-173.106	-168.891	-167.269	-161.724	-160.873	-156.387	-157.895				20.2	-158.945	-158.891	-157.635	-158.564	-160.417	-159.8	-160.516	-159.516
	20.3	-160.571	-158.383	-158.127	-159.046	-159.294	-156.365	-158.844	-158.626	-161.576	-161.718	-160.154	-160.106	-158.03	-161.055	-161.043	-157.496				20.3	-163.567	-160.514	-158.79	-160.329	-165.666	-171.496	-170.221	-171.636	-169.065	-174.039	-167.72	-167.778	-161.741	-160.16	-156.583	-157.404				20.3	-159.156	-158.513	-158.691	-158.72	-160.08	-159.286	-160.302	-159.302
	20.4	-160.445	-158.18	-158.2	-159.345	-160.039	-156.422	-158.617	-158.532	-161.873	-161.928	-160.392	-160.194	-158.039	-160.206	-160.812	-157.933				20.4	-163.252	-160	-158.826	-160.631	-165.597	-171.544	-169.885	-171.147	-169.101	-174.798	-167.206	-167.566	-161.263	-159.633	-157.24	-157.132				20.4	-159.051	-158.691	-159.964	-159.118	-159.478	-159.09	-160.279	-159.279
	20.5	-159.63	-158.521	-158.614	-159.051	-160.483	-156.223	-158	-159.101	-161.823	-162.35	-160.572	-160.212	-158.579	-159.637	-160.54	-158.415				20.5	-162.881	-160.091	-158.763	-160.557	-165.353	-171.636	-170.009	-170.32	-168.571	-174.873	-167.663	-167.045	-160.716	-159.698	-157.91	-156.737				20.5	-158.566	-159.087	-160.43	-159.466	-158.877	-159.302	-160.511	-159.511
	20.6	-158.879	-158.879	-159.221	-159	-160.24	-156.258	-157.714	-159.53	-161.491	-163	-160.674	-160.258	-159.232	-159.245	-160.354	-158.685				20.6	-162.713	-160.668	-158.845	-160.373	-164.893	-171.454	-170.509	-169.557	-167.777	-173.759	-169.004	-166.044	-160.941	-160.312	-157.94	-155.931				20.6	-158.257	-159.286	-160.206	-159.356	-158.453	-159.748	-160.485	-159.485
	20.7	-158.506	-158.825	-159.758	-159.56	-159.287	-156.923	-158.094	-159.362	-160.999	-163.383	-160.882	-160.306	-159.755	-159.289	-160.217	-158.761				20.7	-162.587	-161.451	-159.023	-160.189	-164.429	-171.009	-170.943	-169.355	-167.413	-172.362	-170.269	-164.901	-161.54	-160.839	-157.58	-155.37				20.7	-158.445	-159.496	-159.758	-158.935	-158.453	-159.983	-160.196	-159.196
	20.8	-158.023	-158.823	-160.228	-159.945	-158.405	-157.752	-158.874	-158.907	-160.593	-162.941	-160.953	-160.243	-160.188	-159.895	-160.14	-159.201				20.8	-162.277	-162.042	-159.467	-160.05	-164.236	-170.401	-171.037	-169.776	-167.561	-171.942	-170.455	-164.38	-161.35	-160.793	-157.032	-155.627				20.8	-158.769	-159.869	-159.237	-159.003	-158.996	-159.79	-160.096	-159.096
	20.9	-157.359	-159.067	-160.564	-159.867	-158.251	-158.079	-159.625	-158.524	-160.451	-161.977	-160.692	-159.788	-160.46	-160.302	-160.299	-160.19				20.9	-161.691	-162.085	-160.332	-160.066	-164.312	-169.855	-171.362	-170.215	-167.624	-172.196	-169.823	-164.74	-160.046	-160.653	-156.214	-156.519				20.9	-158.811	-160.155	-158.827	-159.707	-159.641	-159.432	-160.038	-159.038
	21	-157.037	-159.031	-160.447	-160.005	-158.46	-158.046	-160.094	-158.441	-160.776	-161.212	-160.555	-159.151	-160.454	-160.064	-160.603	-161.236				21	-161.231	-161.474	-160.884	-160.019	-164.508	-169.81	-171.926	-170.399	-167.24	-172.421	-169.368	-165.659	-158.596	-160.906	-155.506	-157.385				21	-158.448	-159.882	-158.62	-160.506	-159.799	-159.16	-159.764	-158.764
	21.1	-157.168	-158.639	-159.716	-160.331	-158.458	-158.145	-160.179	-159.055	-161.734	-161.079	-161.073	-158.709	-160.293	-159.765	-160.711	-162.005				21.1	-161.38	-160.487	-160.177	-159.696	-164.676	-170.236	-172.121	-170.611	-166.758	-172.833	-169.087	-166.456	-157.914	-161.11	-155.261	-157.406				21.1	-158.019	-159.28	-158.457	-161.003	-159.456	-159.025	-159.447	-158.447
	21.2	-157.565	-158.295	-158.844	-160.27	-158.406	-158.272	-159.888	-160.184	-163.028	-161.553	-161.837	-158.578	-159.95	-159.961	-160.598	-162.126				21.2	-162.057	-159.716	-158.87	-159.441	-164.742	-170.602	-171.938	-170.661	-166.551	-173.483	-168.099	-166.501	-157.896	-160.8	-155.287	-156.542				21.2	-157.938	-159.254	-158.176	-160.924	-159.054	-159.221	-159.257	-158.257
	21.3	-158.286	-158.116	-158.487	-159.985	-158.707	-158.185	-159.382	-160.779	-163.887	-162.169	-162	-159.157	-159.176	-160.471	-160.656	-161.247				21.3	-162.942	-159.664	-158.291	-159.869	-164.627	-170.861	-171.405	-170.171	-166.357	-173.886	-166.346	-166.141	-158.278	-160.689	-155.262	-155.664				21.3	-158.173	-159.764	-157.908	-160.083	-158.996	-159.76	-159.5	-158.5
	21.4	-158.952	-158.104	-158.629	-159.825	-159.177	-158.125	-158.84	-160.343	-163.776	-162.378	-161.568	-160.441	-158.15	-160.697	-160.943	-159.903				21.4	-163.44	-160.3	-158.349	-160.981	-164.439	-171.299	-170.492	-169.684	-166.017	-173.973	-165.027	-166.289	-158.973	-161.345	-155.122	-155.423				21.4	-158.685	-160.031	-158.021	-159.038	-159.286	-160.068	-160.447	-159.447
	21.5	-158.94	-158.311	-159.054	-159.505	-159.436	-158.353	-158.204	-159.426	-163.014	-162.141	-161.352	-161.304	-157.388	-160.47	-161.069	-159.008				21.5	-163.239	-161.183	-158.683	-161.615	-164.558	-171.737	-169.849	-169.867	-166.106	-174.134	-165.347	-166.998	-159.528	-161.796	-154.841	-155.587				21.5	-159.424	-159.854	-158.449	-158.684	-159.666	-159.915	-161.589	-160.589
	21.6	-158.378	-158.772	-159.59	-158.944	-159.328	-158.675	-157.649	-158.666	-162.317	-161.599	-161.659	-160.874	-157.18	-160.236	-161.149	-158.68				21.6	-162.769	-161.858	-159.438	-161.027	-164.854	-171.767	-170.149	-170.373	-166.977	-174.576	-166.879	-167.525	-159.453	-161.192	-154.391	-155.846				21.6	-159.98	-159.538	-158.627	-159.024	-160.191	-159.79	-161.903	-160.903
	21.7	-157.761	-159.554	-159.885	-158.592	-158.851	-158.498	-157.721	-158.158	-161.869	-160.779	-161.839	-159.683	-157.532	-160.369	-161.619	-158.525				21.7	-162.373	-162.045	-160.082	-160.219	-164.866	-171.387	-171.09	-170.621	-167.784	-174.948	-168.217	-167.304	-159.026	-160.328	-154.039	-156.26				21.7	-160.139	-159.481	-158.262	-159.599	-160.787	-159.933	-161.064	-160.064
	21.8	-157.359	-160.17	-159.964	-158.639	-158.346	-157.627	-158.253	-157.828	-161.442	-160.179	-161.336	-158.788	-158.333	-160.548	-162.231	-158.484				21.8	-162.113	-161.852	-159.966	-160.166	-164.77	-170.96	-171.72	-170.431	-167.584	-174.649	-169.013	-166.595	-158.826	-160.395	-153.871	-156.675				21.8	-159.992	-159.802	-157.804	-160.287	-160.752	-160.044	-159.83	-158.83
	21.9	-157.469	-159.849	-160.146	-158.89	-158.258	-156.71	-158.284	-157.847	-161.155	-160.402	-160.434	-158.567	-159.247	-160.302	-162.609	-158.63				21.9	-162.119	-161.934	-159.38	-160.631	-164.901	-170.822	-171.39	-169.918	-167.102	-173.845	-169.561	-166.13	-159.263	-161.251	-153.823	-157.082				21.9	-159.629	-160.08	-157.928	-160.752	-159.842	-160.029	-159.056	-158.056
	22	-158.193	-158.906	-160.232	-159.132	-158.632	-156.434	-157.647	-158.253	-161.258	-161.409	-159.826	-158.654	-159.785	-159.829	-162.92	-158.886				22	-162.276	-162.539	-158.904	-160.945	-164.998	-170.875	-170.455	-169.218	-167.585	-173.029	-169.736	-165.9	-160.438	-161.68	-154.256	-157.741				22	-159.179	-159.927	-158.524	-160.487	-158.906	-160.162	-159.007	-158.007
	22.1	-158.864	-158.31	-159.78	-159.225	-159.267	-156.843	-157.094	-158.63	-161.542	-162.667	-159.797	-158.774	-159.893	-159.503	-163.135	-159.217				22.1	-162.1	-163.03	-158.817	-160.862	-164.643	-170.865	-169.662	-168.559	-168.513	-172.216	-169.3	-165.66	-161.577	-161.219	-155.188	-158.351				22.1	-158.71	-159.645	-158.894	-159.737	-158.731	-160.394	-159.36	-158.36
	22.2	-158.789	-158.459	-158.935	-159.321	-159.902	-157.414	-156.803	-158.685	-161.744	-163.545	-160.089	-159.04	-159.755	-159.379	-163.256	-159.395				22.2	-161.405	-163.05	-158.925	-160.68	-164.09	-170.897	-169.117	-168.236	-168.58	-171.5	-168.519	-165.774	-161.919	-160.692	-155.887	-158.416				22.2	-158.38	-159.829	-158.847	-159.234	-159.268	-160.439	-159.6	-158.6
	22.3	-158.353	-159.114	-158.239	-159.771	-160.314	-157.57	-156.663	-158.707	-161.767	-163.706	-160.477	-159.524	-159.299	-159.591	-163.484	-159.214				22.3	-160.681	-162.91	-158.695	-160.431	-163.881	-170.917	-168.789	-168.486	-167.972	-171.176	-168.243	-166.181	-161.919	-160.659	-155.681	-158.305				22.3	-158.383	-160.243	-158.675	-159.282	-159.94	-160.346	-159.668	-158.668
	22.4	-158.079	-159.775	-157.88	-160.546	-160.466	-157.254	-156.873	-159.101	-161.476	-163.392	-160.802	-160.066	-158.773	-160.111	-163.299	-159.07				22.4	-160.54	-162.621	-158.199	-159.607	-163.918	-170.589	-169.087	-169.266	-167.808	-171.422	-168.823	-166.396	-162.023	-160.623	-154.603	-158.477				22.4	-158.598	-160.129	-158.547	-159.644	-160.159	-160.31	-159.714	-158.714
	22.5	-158.034	-160.051	-157.807	-161.084	-160.204	-156.995	-157.216	-159.897	-160.964	-163.015	-160.834	-160.459	-158.548	-160.506	-162.355	-159.438				22.5	-160.938	-161.95	-158.234	-158.324	-163.942	-169.98	-170.086	-170.07	-168.321	-172.065	-169.412	-166.45	-162.003	-160.276	-153.538	-158.572				22.5	-158.746	-159.667	-158.641	-160.01	-159.881	-160.136	-159.759	-158.759
	22.6	-158.625	-160.02	-158.039	-160.951	-159.439	-157.196	-157.403	-160.616	-160.587	-162.592	-160.599	-160.726	-158.527	-160.357	-161.299	-160.125				22.6	-161.238	-160.998	-158.903	-157.534	-164.054	-169.593	-171.091	-170.285	-168.838	-172.633	-169.362	-166.411	-161.821	-160.175	-153.5	-158.361				22.6	-158.661	-159.592	-158.946	-160.25	-159.449	-159.531	-159.667	-158.667
	22.7	-159.987	-159.97	-158.46	-160.409	-158.491	-157.504	-157.758	-160.595	-160.576	-162.011	-160.153	-161.134	-158.612	-159.809	-160.724	-160.506				22.7	-161.171	-160.398	-159.602	-157.632	-164.206	-169.689	-171.486	-169.758	-168.802	-172.644	-169.16	-166.115	-161.823	-160.815	-154.764	-158.121				22.7	-158.312	-159.89	-158.877	-160.319	-159.183	-158.685	-159.307	-158.307
	22.8	-161.125	-159.9	-158.97	-159.893	-157.858	-157.512	-158.544	-159.794	-160.739	-161.523	-159.536	-161.693	-158.712	-159.596	-160.716	-160.317				22.8	-161.317	-160.571	-160.127	-157.966	-164.219	-170.09	-171.603	-168.924	-168.089	-172.158	-169.409	-165.866	-162.267	-161.803	-156.53	-157.771				22.8	-157.985	-160.146	-158.295	-160.201	-159.378	-158.17	-159.045	-158.045
	22.9	-160.977	-159.718	-159.528	-159.568	-157.753	-157.45	-159.38	-159.009	-160.715	-161.224	-159.146	-162.201	-158.575	-160.05	-161.099	-159.853				22.9	-161.886	-161.015	-160.336	-157.922	-164.063	-170.686	-172.152	-168.442	-166.924	-171.949	-169.85	-165.879	-162.732	-162.35	-157.648	-157.121				22.9	-158.062	-160.284	-157.95	-159.823	-159.906	-158.301	-159.352	-158.352
	23	-159.799	-159.547	-159.92	-159.473	-157.975	-157.476	-159.63	-158.616	-160.716	-161.014	-159.135	-162.488	-158.117	-160.819	-161.611	-159.535				23	-162.345	-161.406	-160.072	-157.877	-163.64	-171.424	-172.761	-168.785	-166.029	-172.486	-169.906	-165.736	-162.333	-162.222	-157.968	-156.656				23	-158.483	-160.259	-158.141	-159.041	-160.335	-158.89	-159.95	-158.95
	23.1	-158.629	-159.515	-159.953	-159.487	-158.252	-157.312	-159.127	-158.416	-161.327	-161.037	-159.309	-162.291	-157.681	-161.273	-162.022	-159.577				23.1	-162.488	-161.924	-159.632	-158.317	-163.021	-171.833	-172.665	-169.663	-166.242	-173.4	-169.581	-165.371	-161.083	-161.856	-157.99	-156.877				23.1	-158.706	-160.071	-158.336	-158.235	-160.526	-159.472	-160.104	-159.104
	23.2	-157.766	-159.468	-159.772	-159.482	-158.436	-157.082	-158.535	-158.425	-162.303	-161.216	-159.69	-161.542	-158.015	-160.984	-162.43	-159.861				23.2	-162.358	-162.184	-159.327	-158.927	-162.832	-171.493	-171.98	-170.17	-167.727	-174.233	-169.469	-165.093	-160.165	-161.71	-157.774	-157.317				23.2	-158.551	-160.034	-158.195	-158.278	-160.511	-159.708	-159.756	-158.756
	23.3	-157.032	-159.066	-159.532	-159.671	-158.562	-157.216	-158.469	-158.568	-162.686	-161.277	-160.364	-160.708	-159.317	-160.303	-162.961	-160.022				23.3	-161.92	-161.866	-159.248	-159.34	-163.451	-170.719	-171.22	-170.057	-169.812	-174.795	-169.875	-165.191	-160.179	-161.582	-156.858	-157.3				23.3	-158.515	-160.296	-157.811	-159.038	-160.268	-159.843	-159.706	-158.706
	23.4	-156.809	-158.202	-159.183	-160.166	-158.794	-157.464	-158.617	-158.782	-162.178	-161.465	-160.972	-160.382	-160.55	-159.989	-163.274	-159.71				23.4	-161.4	-161.529	-159.454	-159.61	-164.281	-170.044	-170.559	-169.953	-171.324	-174.962	-170.142	-165.777	-160.402	-161.282	-155.503	-156.785				23.4	-158.762	-160.643	-157.315	-159.439	-159.834	-160.217	-160.31	-159.31
	23.5	-157.442	-157.419	-158.898	-160.543	-159.02	-157.336	-158.493	-159.15	-161.184	-161.836	-160.968	-160.404	-160.659	-160.383	-162.927	-158.975				23.5	-161.023	-161.625	-160.004	-159.879	-164.654	-169.962	-170.072	-170.205	-171.185	-174.792	-169.918	-166.43	-160.268	-160.994	-154.91	-156.065				23.5	-158.913	-160.752	-157.097	-159.208	-159.281	-160.545	-161.084	-160.084
	23.6	-158.475	-157.447	-158.765	-160.406	-158.973	-157.135	-158.174	-159.375	-160.224	-161.93	-160.551	-160.185	-160.02	-160.831	-162.086	-158.513				23.6	-160.915	-161.996	-160.745	-160.081	-164.626	-170.8	-170.108	-170.452	-169.16	-174.622	-169.862	-166.669	-160.235	-160.489	-155.532	-155.5				23.6	-158.79	-160.519	-157.651	-159.096	-158.76	-160.424	-161.627	-160.627
	23.7	-159.308	-158.151	-158.565	-160.075	-158.684	-157.205	-157.932	-159.003	-159.963	-161.827	-160.505	-160.038	-159.828	-160.41	-161.58	-158.719				23.7	-160.998	-162.45	-161.163	-160.283	-164.528	-171.932	-170.639	-170.333	-166.642	-174.597	-170.107	-166.605	-160.888	-159.699	-156.645	-155.3				23.7	-158.667	-160.155	-158.65	-159.549	-158.502	-159.871	-161.722	-160.722
	23.8	-159.756	-158.972	-158.323	-160.036	-158.441	-157.255	-157.87	-158.385	-160.698	-162.097	-161.157	-160.508	-160.293	-159.393	-161.716	-159.135				23.8	-160.985	-162.736	-160.805	-160.655	-164.678	-172.319	-171.081	-170.061	-165.552	-174.453	-169.911	-166.588	-162.021	-159.132	-157.4	-155.362				23.8	-158.845	-159.875	-159.321	-160.066	-158.741	-159.042	-161.33	-160.33
	23.9	-159.758	-159.791	-158.391	-160.171	-158.412	-157.063	-157.85	-158.406	-161.813	-162.674	-162.021	-160.941	-160.437	-158.846	-161.789	-159.449				23.9	-160.9	-162.43	-159.872	-160.651	-165.052	-171.881	-171.254	-169.97	-166.058	-173.998	-169.13	-166.674	-162.846	-159.168	-157.429	-155.679				23.9	-159.139	-159.671	-159.637	-159.944	-159.155	-158.351	-160.877	-159.877
	24	-159.414	-160.416	-158.944	-160.008	-158.565	-156.895	-157.852	-159.116	-162.406	-163.018	-162.333	-160.482	-159.776	-159.159	-161.474	-159.69				24	-160.778	-161.721	-159.174	-159.835	-165.164	-171.073	-171.491	-170.053	-166.85	-173.485	-168.674	-166.884	-162.701	-160.133	-157.068	-156.503				24	-159.204	-159.53	-159.767	-159.186	-159.189	-158.4	-160.628	-159.628
	24.1	-158.981	-160.46	-159.586	-159.319	-158.835	-157.08	-158.168	-159.695	-162.346	-163.036	-162.127	-159.472	-158.823	-159.916	-161.036	-159.789				24.1	-160.574	-161.451	-159.117	-159.008	-164.883	-170.116	-171.722	-170.245	-167.279	-173.244	-169.268	-167.187	-161.817	-161.612	-156.785	-157.791				24.1	-159.038	-159.566	-159.453	-158.49	-159.145	-159.031	-160.476	-159.476
	24.2	-158.585	-160.076	-159.849	-158.303	-159.203	-157.498	-158.843	-159.788	-162.155	-163.017	-162.042	-158.818	-158.204	-160.595	-160.495	-159.741				24.2	-160.477	-161.803	-159.121	-158.929	-164.572	-169.457	-171.282	-170.299	-167.662	-173.163	-170.401	-167.062	-161.223	-162.335	-156.324	-158.675				24.2	-158.853	-159.689	-158.843	-158.304	-159.36	-159.59	-160.334	-159.334
	24.3	-158.325	-159.708	-159.748	-157.424	-159.734	-157.74	-159.544	-159.853	-162.109	-163.063	-162.195	-158.841	-158.184	-161.177	-160.047	-159.73				24.3	-160.822	-162.255	-158.582	-159.015	-164.61	-169.636	-170.234	-169.762	-168.165	-173.07	-170.824	-166.301	-161.351	-162.074	-155.518	-158.416				24.3	-158.853	-159.574	-158.418	-158.279	-159.445	-159.821	-160.396	-159.396
	24.4	-158.249	-159.432	-159.447	-157.085	-160.348	-157.66	-159.769	-160.187	-162.081	-162.984	-162.197	-159.194	-158.487	-161.82	-160.194	-159.838				24.4	-161.583	-162.607	-157.826	-158.653	-164.994	-170.39	-169.503	-168.835	-168.68	-173.198	-170.275	-165.582	-161.773	-161.316	-155.216	-157.653				24.4	-158.96	-159.235	-158.15	-158.173	-159.362	-159.843	-160.823	-159.823
	24.5	-158.021	-159.116	-158.98	-157.324	-160.714	-157.476	-159.164	-160.411	-161.821	-162.698	-161.9	-159.457	-158.781	-162.352	-160.931	-159.805				24.5	-162.228	-162.758	-157.678	-158.393	-165.178	-170.891	-169.329	-168.285	-169.225	-173.554	-169.68	-165.763	-162.298	-160.273	-155.945	-157.421				24.5	-159.085	-159.074	-157.939	-158.146	-159.578	-159.916	-161.378	-160.378
	24.6	-157.376	-158.823	-158.585	-157.863	-160.784	-157.324	-158.185	-160.283	-161.208	-162.368	-161.437	-159.681	-159.097	-162.398	-161.83	-159.498				24.6	-162.409	-162.29	-158.205	-158.765	-164.808	-171.027	-169.52	-168.393	-169.644	-173.598	-169.244	-166.762	-162.813	-159.671	-157.308	-157.871				24.6	-159.375	-159.097	-157.956	-158.186	-160.015	-160.207	-161.651	-160.651
	24.7	-156.748	-158.727	-158.577	-158.462	-160.661	-157.012	-157.589	-160.049	-160.585	-162.179	-160.986	-160.172	-159.475	-161.795	-162.492	-159.3				24.7	-162.352	-161.17	-158.644	-159.357	-164.256	-171.223	-170.031	-168.997	-169.489	-173.211	-168.486	-167.594	-162.639	-159.885	-158.663	-158.634				24.7	-159.515	-159.043	-158.063	-158.396	-160.096	-160.412	-161.419	-160.419
	24.8	-156.857	-158.983	-158.918	-158.912	-160.276	-156.572	-157.664	-159.788	-160.552	-162.23	-160.715	-160.95	-159.818	-160.823	-162.58	-159.639				24.8	-162.269	-160.089	-158.52	-159.471	-164.069	-171.506	-170.708	-169.7	-168.731	-172.982	-167.898	-167.664	-161.596	-160.352	-158.984	-159.174				24.8	-158.985	-158.99	-157.995	-158.932	-159.675	-160.072	-160.84	-159.84
	24.9	-157.785	-159.413	-159.189	-159.09	-159.783	-156.299	-158.154	-159.562	-161.197	-162.583	-160.636	-161.695	-160.074	-160.037	-162.204	-160.272				24.9	-162.303	-159.687	-158.326	-159.105	-164.258	-171.544	-171.413	-170.036	-167.878	-173.199	-168.022	-167.235	-160.668	-160.72	-157.861	-158.871				24.9	-158.139	-159.187	-158.116	-159.442	-159.19	-159.457	-160.268	-159.268
	25	-158.774	-159.408	-159.12	-159.315	-159.504	-156.338	-158.569	-159.504	-161.763	-163.047	-160.527	-161.812	-160.119	-159.911	-161.676	-160.587				25	-162.821	-159.739	-158.447	-159.148	-164.431	-171.156	-171.827	-170.219	-167.272	-173.449	-168.584	-166.723	-160.76	-160.93	-156.504	-157.755				25	-157.572	-159.5	-158.66	-159.588	-159.036	-159.274	-159.854	-158.854
	25.1	-159.206	-158.818	-159.02	-159.787	-159.351	-156.593	-158.768	-159.338	-161.686	-163.237	-160.25	-161.021	-159.777	-160.442	-161.145	-160.657				25.1	-163.462	-159.94	-158.338	-159.965	-164.605	-170.566	-171.648	-170.618	-166.826	-173.51	-169.46	-166.602	-161.524	-160.905	-155.857	-156.541				25.1	-157.301	-159.355	-159.068	-159.53	-159.039	-159.542	-159.556	-158.556
	25.2	-159.216	-158.368	-159.102	-160	-158.989	-156.819	-158.678	-158.988	-161.25	-163.158	-159.956	-159.979	-159.314	-161.163	-160.833	-160.917				25.2	-163.521	-160.612	-157.993	-160.486	-164.804	-170.122	-171.285	-170.878	-166.663	-173.531	-170.131	-167.133	-161.77	-160.674	-155.692	-155.716				25.2	-157.219	-158.698	-158.987	-159.385	-158.936	-159.616	-159.376	-158.376
	25.3	-159.059	-158.596	-159.144	-159.659	-158.709	-156.949	-158.141	-158.881	-160.922	-163.087	-159.986	-159.41	-159.134	-161.608	-160.868	-161.203				25.3	-163.235	-161.488	-158.267	-159.769	-164.659	-169.949	-171.324	-170.464	-166.894	-173.348	-169.645	-167.687	-161.142	-160.302	-155.772	-155.465				25.3	-157.387	-158.275	-158.663	-159.045	-158.981	-159.261	-159.247	-158.247
	25.4	-158.725	-159.218	-159.224	-159.17	-158.9	-157.07	-157.595	-159.171	-160.923	-163.246	-160.439	-159.18	-159.111	-161.701	-161.134	-161.305				25.4	-163.05	-161.9	-159.195	-158.491	-164.38	-169.934	-171.615	-169.849	-166.792	-172.92	-168.303	-167.597	-160.4	-159.998	-155.953	-155.835				25.4	-157.926	-158.438	-158.519	-158.558	-159.38	-158.94	-159.028	-158.028
	25.5	-158.426	-159.783	-159.665	-158.906	-159.001	-157.081	-157.541	-159.31	-161.23	-163.54	-160.889	-159.077	-158.925	-161.719	-161.511	-161.355				25.5	-162.958	-161.979	-159.712	-158.052	-164.736	-169.75	-171.5	-169.965	-166.005	-172.706	-167.244	-167.113	-159.993	-159.948	-155.887	-156.327				25.5	-158.728	-158.713	-158.779	-158.231	-160.014	-158.904	-158.919	-157.919
	25.6	-158.45	-160.172	-160.157	-159.004	-158.48	-156.749	-157.774	-158.851	-161.502	-163.416	-160.889	-159.348	-158.684	-161.788	-161.781	-161.274				25.6	-163.007	-162.074	-159.403	-158.969	-165.619	-169.319	-170.705	-170.378	-165.47	-172.813	-167.102	-166.762	-159.742	-159.954	-155.622	-156.272				25.6	-159.28	-158.774	-159.147	-158.422	-160.717	-158.913	-159.289	-158.289
	25.7	-158.476	-160.251	-160.209	-159.361	-157.832	-156.151	-158.076	-158.247	-161.432	-162.764	-160.573	-159.928	-158.637	-161.583	-161.809	-161.004				25.7	-163.153	-162.139	-159.144	-160.582	-165.896	-169.145	-169.488	-169.86	-165.699	-172.796	-167.939	-166.694	-159.733	-159.861	-155.54	-155.823				25.7	-159.096	-158.567	-159.418	-159.139	-161.119	-158.949	-159.994	-158.994
	25.8	-158.116	-159.798	-159.8	-159.52	-157.588	-155.893	-158.501	-157.926	-161.205	-162.183	-160.548	-160.523	-158.854	-160.87	-161.745	-160.714				25.8	-163.192	-162.116	-159.287	-161.866	-164.941	-169.546	-168.431	-168.582	-165.997	-172.547	-169.146	-166.708	-160.241	-159.814	-155.688	-155.56				25.8	-158.389	-158.094	-159.827	-159.793	-160.807	-159.052	-160.59	-159.59
	25.9	-157.577	-159.1	-159.142	-159.307	-157.728	-156.332	-158.753	-157.808	-161.084	-161.759	-160.896	-161.282	-159.262	-160.065	-161.673	-160.402				25.9	-163.416	-161.982	-159.296	-162.159	-163.458	-170.028	-168.181	-167.663	-166.02	-172.442	-169.861	-166.41	-161.328	-159.875	-156.163	-155.605				25.9	-157.948	-157.941	-160.114	-159.75	-159.892	-158.859	-160.898	-159.898
	26	-157.389	-158.83	-158.559	-159.128	-158.386	-157.069	-158.529	-158.033	-160.877	-161.253	-160.98	-162.031	-159.707	-159.819	-161.384	-160.011				26	-164.01	-161.615	-158.942	-161.243	-162.593	-169.843	-168.654	-167.518	-166.203	-172.548	-169.697	-165.838	-162.534	-160.08	-157.165	-155.917				26	-157.942	-158.646	-159.808	-159.173	-159.124	-158.291	-160.982	-159.982
	26.1	-157.699	-159.304	-158.441	-159.197	-159.602	-157.644	-158.141	-158.728	-160.472	-161.172	-160.802	-162.196	-160.008	-160.303	-160.847	-159.769				26.1	-164.468	-161.058	-158.479	-159.573	-162.965	-169.171	-169.274	-168.149	-166.682	-172.723	-169.006	-165.482	-162.875	-160.578	-157.987	-156.309				26.1	-157.693	-159.617	-159.203	-158.71	-159.06	-157.929	-160.853	-159.853
	26.2	-158.124	-160.018	-158.742	-159.369	-160.577	-157.815	-158.141	-159.552	-160.172	-161.953	-161.016	-161.812	-160.123	-160.908	-160.526	-159.942				26.2	-164.508	-160.559	-158.293	-158.487	-164.409	-169.026	-169.964	-169.622	-167.285	-173.089	-168.835	-165.63	-162.159	-161.125	-157.426	-156.349				26.2	-157.105	-159.917	-158.773	-158.737	-159.506	-158.108	-160.562	-159.562
	26.3	-158.29	-160.157	-159.054	-159.447	-160.504	-157.255	-158.535	-160.215	-160.259	-163.027	-161.64	-161.199	-160.138	-160.864	-160.666	-160.309				26.3	-164.093	-160.251	-158.413	-158.815	-165.75	-169.988	-170.576	-171.124	-167.924	-173.72	-169.543	-166.396	-161.121	-161.149	-155.959	-156.131				26.3	-157.002	-159.602	-158.628	-159.075	-160.047	-158.542	-160.412	-159.412
	26.4	-158.074	-159.673	-159.35	-159.23	-159.705	-156.2	-158.718	-160.756	-160.715	-163.767	-161.918	-160.426	-160.043	-160.352	-161.058	-160.299				26.4	-162.876	-160.011	-158.509	-159.805	-165.666	-171.217	-170.458	-171.335	-168.479	-174.143	-170.11	-167.564	-160.418	-160.806	-155.389	-156.136				26.4	-157.489	-159.481	-158.816	-159.313	-160.545	-158.862	-160.631	-159.631
	26.5	-157.703	-159.243	-159.857	-158.839	-159.159	-155.781	-158.472	-161.108	-161.19	-164.113	-161.405	-159.756	-159.846	-160.269	-161.634	-159.835				26.5	-161.186	-159.84	-158.663	-160.336	-164.554	-171.325	-169.7	-170.288	-168.676	-173.697	-169.804	-168.535	-160.39	-160.971	-156.165	-156.313				26.5	-157.832	-159.853	-159.092	-159.228	-160.918	-159.048	-160.939	-159.939
	26.6	-157.629	-159.239	-160.301	-158.826	-159.081	-156.241	-158.372	-160.991	-161.141	-163.933	-160.612	-159.517	-159.655	-160.859	-162.364	-159.356				26.6	-159.99	-160.047	-159.231	-159.987	-164.089	-170.315	-169.45	-169.244	-168.261	-172.547	-169.234	-169.119	-160.892	-161.691	-157.344	-156.16				26.6	-157.85	-160.32	-158.933	-158.974	-160.874	-159.182	-160.792	-159.792
	26.7	-157.984	-159.257	-160.065	-159.316	-158.906	-156.699	-158.833	-160.395	-160.457	-163.102	-160.221	-159.44	-159.506	-161.24	-162.969	-159.283				26.7	-159.465	-160.525	-160.107	-159.118	-164.623	-169.413	-170.025	-169.034	-167.555	-171.785	-169.319	-169.406	-161.505	-162.069	-158.061	-155.67				26.7	-157.813	-160.737	-158.45	-158.962	-160.336	-158.994	-160.126	-159.126
	26.8	-158.544	-158.747	-159.167	-159.683	-158.644	-156.98	-159.308	-159.459	-159.875	-162.167	-160.334	-158.998	-159.529	-160.763	-163.164	-159.57				26.8	-159.279	-160.639	-160.629	-158.456	-164.983	-169.483	-170.394	-169.597	-167.171	-171.899	-169.82	-168.989	-162.106	-161.798	-158.028	-155.606				26.8	-157.597	-161.338	-158.215	-159.285	-159.638	-158.632	-159.643	-158.643
	26.9	-159.082	-158.13	-158.477	-159.662	-158.895	-157.522	-159.031	-158.374	-159.986	-161.761	-160.686	-158.436	-159.809	-159.946	-162.626	-159.808				26.9	-159.314	-160.565	-160.384	-158.476	-164.487	-170.293	-169.935	-170.439	-167.313	-172.196	-169.757	-167.378	-162.33	-161.01	-157.861	-156.495				26.9	-157.048	-161.976	-158.346	-159.523	-158.962	-158.669	-159.857	-158.857
	27	-159.37	-158.414	-158.596	-159.711	-159.469	-158.388	-158.18	-157.732	-160.502	-161.872	-160.989	-158.421	-160.082	-159.438	-161.546	-159.938				27	-159.594	-161.054	-159.779	-159.161	-163.648	-170.684	-169.543	-171.051	-167.79	-172.31	-168.932	-164.926	-162.049	-160.147	-158.258	-157.837				27	-156.679	-162.164	-158.635	-159.542	-158.44	-158.901	-160.318	-159.318
	27.1	-159.342	-159.502	-159.039	-159.861	-159.662	-159.099	-157.514	-157.894	-161.133	-162.317	-161.034	-159.124	-160.344	-159.085	-160.866	-160.066				27.1	-160.296	-162.022	-159.25	-159.947	-163.306	-169.935	-170.08	-170.983	-168.028	-172.604	-167.961	-163.061	-161.849	-159.891	-158.87	-158.598				27.1	-156.889	-161.625	-158.795	-159.723	-158.341	-158.909	-160.465	-159.465
	27.2	-159.022	-160.474	-159.188	-159.681	-159.444	-159.019	-157.357	-158.308	-161.929	-162.929	-160.69	-160.121	-160.895	-158.637	-160.907	-160.006				27.2	-161.522	-162.719	-159.087	-160.223	-163.712	-168.686	-170.755	-170.101	-167.611	-173.069	-167.213	-162.988	-161.691	-160.014	-158.867	-158.087				27.2	-157.343	-160.68	-158.649	-160.065	-158.565	-158.964	-160.389	-159.389
	27.3	-158.544	-160.879	-159.345	-159.392	-159.313	-158.226	-157.529	-158.512	-162.519	-163.131	-159.912	-160.737	-161.486	-158.4	-161.051	-159.689				27.3	-162.607	-162.628	-159.658	-159.836	-164.206	-168.093	-170.708	-169.066	-167.065	-173.363	-166.975	-164.344	-161.037	-159.915	-157.793	-156.589				27.3	-157.581	-160.123	-158.346	-159.959	-159.093	-159.255	-160.36	-159.36
	27.4	-158.197	-160.784	-159.809	-159.482	-159.428	-157.607	-157.968	-158.762	-162.447	-162.737	-159.087	-160.509	-161.499	-158.673	-160.978	-159.546				27.4	-162.692	-161.879	-160.526	-159.105	-164.302	-168.669	-170.554	-168.762	-166.857	-173.245	-167.533	-165.935	-160.381	-159.829	-156.202	-155.358				27.4	-157.605	-160.113	-158.186	-159.048	-160.067	-159.143	-160.44	-159.44
	27.5	-157.956	-160.569	-159.901	-159.502	-159.56	-157.684	-158.623	-159.064	-161.973	-162.354	-158.972	-159.609	-160.757	-159.211	-161.109	-159.887				27.5	-161.954	-161.196	-160.777	-158.651	-164.582	-169.86	-170.85	-169.266	-166.474	-172.821	-168.517	-166.755	-160.674	-160.107	-155.283	-155.077				27.5	-157.505	-160.127	-158.165	-157.805	-161.138	-158.331	-160.648	-159.648
	27.6	-157.727	-160.445	-159.102	-158.917	-159.594	-157.969	-159.263	-158.906	-161.548	-162.329	-159.556	-158.98	-159.631	-159.613	-161.855	-160.503				27.6	-161.325	-161.084	-160.27	-158.684	-165.125	-170.723	-171.09	-170.061	-165.796	-172.369	-169.248	-166.578	-161.57	-160.703	-155.426	-155.07				27.6	-157.169	-159.928	-158.166	-157.238	-161.71	-157.743	-160.875	-159.875
	27.7	-157.622	-160.174	-158.215	-158.258	-159.382	-157.841	-159.649	-158.447	-161.169	-162.429	-159.986	-159.192	-158.82	-159.843	-162.961	-160.811				27.7	-161.333	-161.478	-159.677	-158.717	-165.129	-170.723	-170.818	-170.824	-165.602	-171.875	-169.432	-166.349	-161.967	-161.578	-155.888	-154.827				27.7	-156.867	-159.684	-158.454	-157.858	-161.454	-158.079	-160.883	-159.883
	27.8	-157.437	-159.585	-158.175	-158.224	-158.76	-157.246	-159.605	-158.552	-160.761	-162.327	-160.011	-159.675	-158.838	-159.998	-163.753	-160.501				27.8	-161.561	-162.044	-159.681	-158.495	-164.612	-170.045	-170.284	-171.604	-166.099	-171.458	-169.379	-166.899	-161.255	-162.533	-156.155	-154.837				27.8	-157.165	-159.61	-159.025	-159.139	-160.46	-158.663	-160.868	-159.868
	27.9	-157.049	-158.629	-158.554	-158.668	-158.129	-156.562	-159.29	-159.463	-160.569	-162.149	-160.176	-159.915	-159.421	-159.843	-163.944	-160.055				27.9	-161.468	-162.259	-160.146	-158.332	-164.185	-169.39	-170.226	-172.384	-166.819	-171.464	-169.54	-167.761	-159.589	-163.108	-156.344	-155.434				27.9	-157.958	-159.683	-159.315	-160.11	-159.426	-158.691	-161.208	-160.208
	28	-156.808	-157.54	-158.352	-158.98	-158.005	-156.174	-158.949	-160.553	-160.586	-162.237	-160.45	-160.002	-159.901	-159.503	-163.716	-159.985				28	-161.341	-161.922	-160.127	-158.381	-164.262	-169.312	-170.893	-172.673	-167.653	-171.69	-169.503	-168.127	-158.116	-163.194	-156.486	-156.041				28	-158.462	-159.697	-159.073	-160.125	-159.002	-158.325	-161.56	-160.56
	28.1	-157.029	-156.942	-157.838	-158.814	-158.261	-156.002	-158.586	-160.888	-160.477	-162.375	-160.415	-160.032	-159.968	-159.616	-163.176	-160.099				28.1	-161.629	-161.415	-159.352	-158.711	-164.915	-169.83	-171.633	-172.173	-168.433	-171.796	-168.864	-167.856	-158.055	-163.065	-156.683	-156.342				28.1	-158.501	-159.358	-158.812	-159.237	-159.139	-158.124	-161.454	-160.454
	28.2	-157.653	-157.237	-157.878	-158.39	-158.561	-155.637	-158.287	-160.212	-160.213	-162.302	-160.194	-159.849	-159.609	-160.217	-162.429	-160.022				28.2	-162.041	-160.883	-158.674	-159.353	-165.656	-170.585	-171.855	-171.437	-168.505	-172.137	-168.359	-167.441	-159.038	-162.738	-156.977	-156.808				28.2	-158.506	-158.582	-158.97	-158.229	-159.424	-158.327	-161.222	-160.222
	28.3	-158.239	-158.107	-158.339	-158.19	-158.865	-155.12	-158.092	-159.321	-159.891	-162.195	-160.236	-159.625	-158.842	-160.767	-161.844	-159.806				28.3	-162.341	-160.204	-158.543	-159.922	-166.075	-171.228	-171.636	-171.119	-167.698	-173.013	-168.806	-167.305	-159.904	-162.006	-156.846	-157.502				28.3	-158.516	-158.01	-159.145	-157.93	-159.537	-158.806	-161.213	-160.213
	28.4	-158.49	-158.689	-158.749	-158.385	-159.144	-155.001	-157.719	-159.136	-159.762	-162.109	-160.708	-159.672	-157.853	-161.084	-161.442	-159.626				28.4	-162.575	-159.765	-158.681	-160.209	-166.402	-171.6	-171.419	-171.195	-166.761	-173.821	-170.328	-167.244	-160.445	-161.309	-156.165	-157.774				28.4	-158.576	-158.315	-158.997	-158.306	-159.369	-159.405	-161.098	-160.098
	28.5	-158.53	-158.68	-159.059	-158.733	-159.338	-155.461	-157.162	-159.686	-160.005	-162.093	-161.228	-159.689	-157.447	-161.386	-160.941	-159.535				28.5	-162.508	-159.944	-159.014	-160.561	-166.56	-171.638	-171.489	-171.249	-166.39	-173.554	-172.101	-167.002	-160.957	-161.376	-156.006	-157.202				28.5	-158.849	-159.027	-158.971	-158.584	-159.002	-159.904	-160.582	-159.582
	28.6	-158.392	-158.72	-159.134	-158.821	-159.516	-156.07	-156.895	-160.174	-160.412	-162.259	-161.397	-159.675	-158.554	-161.637	-160.292	-159.527				28.6	-162.117	-160.405	-159.473	-160.98	-166.154	-171.183	-171.729	-170.941	-166.475	-172.26	-172.693	-166.842	-161.277	-161.958	-156.989	-156.179				28.6	-158.917	-159.386	-159.161	-158.289	-158.814	-160.051	-159.97	-158.97
	28.7	-158.072	-159.027	-158.939	-158.613	-159.635	-156.574	-157.135	-160.09	-160.977	-162.383	-161.181	-160.332	-160.741	-161.446	-159.628	-159.522				28.7	-161.879	-160.776	-159.918	-161.015	-165.147	-170.241	-171.758	-170.36	-166.511	-171.209	-171.79	-166.931	-160.903	-162.222	-158.03	-155.903				28.7	-158.595	-159.543	-158.974	-157.808	-159.208	-159.934	-159.728	-158.728
	28.8	-157.907	-159.264	-158.865	-158.701	-159.63	-157.195	-157.603	-159.712	-161.839	-162.31	-160.775	-161.51	-162.375	-160.787	-159.261	-159.447				28.8	-161.875	-161.164	-160.386	-160.743	-163.677	-169.424	-171.194	-170.062	-166.51	-171.146	-170.51	-167.031	-159.812	-161.935	-157.92	-156.966				28.8	-158.353	-160.028	-158.56	-157.681	-159.99	-159.727	-159.853	-158.853
	28.9	-158.054	-159.436	-159.065	-159.345	-159.449	-157.777	-158.055	-159.192	-162.576	-162.242	-160.333	-162.061	-162.564	-160.186	-159.263	-159.587				28.9	-161.947	-161.707	-160.705	-160.429	-162.104	-169.483	-170.075	-170.415	-166.825	-171.865	-169.938	-166.983	-158.939	-161.512	-156.994	-158.021				28.9	-158.379	-160.734	-158.731	-158.047	-160.401	-159.375	-160.103	-159.103
	29	-158.003	-159.478	-159.266	-159.906	-159.199	-157.947	-158.401	-158.503	-162.641	-162.36	-160.164	-161.691	-161.823	-159.993	-159.381	-160.256				29	-162.168	-162.352	-160.618	-159.862	-161.291	-170.208	-169.071	-171.112	-167.035	-172.999	-170.253	-166.586	-159.322	-161.114	-156.272	-157.635				29	-158.565	-160.917	-159.444	-158.518	-160.004	-158.894	-160.335	-159.335
	29.1	-157.45	-159.112	-159.396	-160.024	-159.231	-157.692	-158.48	-158.154	-162.19	-162.656	-160.714	-161.3	-160.903	-159.896	-159.621	-160.968				29.1	-162.064	-163.054	-160.018	-159.152	-161.916	-170.761	-168.744	-171.387	-166.703	-174.075	-170.778	-165.732	-160.664	-160.566	-156.098	-156.177				29.1	-158.833	-160.257	-159.894	-158.632	-159.151	-158.686	-160.534	-159.534
	29.2	-156.986	-158.691	-159.572	-160.092	-159.556	-157.151	-158.416	-158.561	-161.751	-162.964	-161.849	-161.297	-160.113	-159.624	-160.262	-160.981				29.2	-161.293	-163.543	-159.013	-158.841	-163.346	-170.975	-168.945	-171.106	-166.658	-174.713	-170.822	-164.998	-161.698	-160.018	-155.992	-154.784				29.2	-158.759	-159.29	-159.762	-158.633	-158.42	-159.125	-160.764	-159.764
	29.3	-157.046	-158.684	-159.541	-160.338	-159.838	-156.827	-158.553	-159.486	-161.537	-163.08	-162.844	-161.201	-159.561	-159.528	-161.23	-160.351				29.3	-160.92	-163.062	-158.371	-159.014	-164.305	-170.815	-169.251	-170.974	-167.331	-174.624	-170.418	-164.983	-161.734	-160.084	-155.627	-154.286				29.3	-158.131	-158.625	-159.521	-158.94	-158.011	-159.66	-160.879	-159.879
	29.4	-157.392	-159.167	-159.13	-160.471	-159.961	-157.436	-158.886	-160.453	-161.575	-163.053	-163.246	-160.576	-159.344	-159.91	-161.935	-159.626				29.4	-161.711	-161.414	-158.759	-159.407	-164.502	-170.014	-169.49	-171.148	-167.734	-173.636	-169.925	-165.151	-161.09	-160.91	-155.239	-154.986				29.4	-157.419	-158.442	-159.508	-159.257	-157.971	-159.525	-160.811	-159.811
	29.5	-157.75	-159.937	-158.771	-160.113	-159.833	-158.581	-159.013	-160.89	-161.774	-163.077	-163.159	-159.588	-159.498	-160.425	-161.932	-159.228				29.5	-162.643	-159.576	-159.39	-159.916	-164.464	-169.233	-169.495	-170.984	-167.488	-172.459	-169.797	-165.122	-160.504	-161.754	-155.413	-156.42				29.5	-157.069	-158.598	-159.526	-159.303	-158.386	-159.149	-160.76	-159.76
	29.6	-158.226	-160.395	-158.973	-159.41	-159.431	-159.081	-158.543	-160.555	-161.57	-163.25	-162.744	-158.778	-159.866	-160.488	-161.444	-159.211				29.6	-162.646	-158.547	-159.281	-160.495	-164.707	-169.573	-169.174	-170.417	-167.271	-172.191	-170.334	-165.566	-160.286	-161.876	-156.452	-157.789				29.6	-156.997	-158.891	-159.436	-159.366	-159.149	-159.375	-160.73	-159.73
	29.7	-159.064	-160.106	-159.648	-158.937	-159.071	-158.562	-157.753	-159.909	-160.514	-163.424	-162.125	-158.434	-160.08	-160.09	-161.125	-159.313				29.7	-161.838	-158.446	-159.043	-160.615	-165.262	-170.816	-168.813	-170.108	-167.311	-172.621	-170.964	-166.631	-160.353	-161.364	-157.633	-158.47				29.7	-156.908	-159.125	-159.402	-159.538	-159.87	-160.021	-160.72	-159.72
	29.8	-159.935	-159.328	-160.222	-158.77	-159.147	-157.55	-157.474	-159.481	-159.209	-163.111	-161.586	-158.401	-159.92	-159.715	-161.189	-159.432				29.8	-161.019	-158.817	-159.586	-159.866	-165.712	-171.891	-168.59	-170.262	-167.595	-172.717	-170.876	-167.367	-160.67	-161.007	-158.221	-158.211				29.8	-156.81	-159.005	-159.527	-159.871	-160.102	-160.376	-161.034	-160.034
	29.9	-160.246	-158.802	-160.405	-158.603	-159.758	-156.635	-157.879	-159.347	-158.688	-161.992	-161.329	-158.432	-159.423	-159.641	-161.369	-159.736				29.9	-160.996	-159.262	-160.299	-158.955	-165.975	-172.243	-168.514	-170.453	-168.296	-172.251	-170.27	-167.014	-160.93	-161.247	-158.501	-157.501				29.9	-157.028	-158.608	-159.699	-160.386	-159.84	-160.251	-161.617	-160.617
	30	-160.128	-158.857	-160.524	-158.447	-160.26	-155.999	-158.457	-159.252	-159.21	-160.567	-161.142	-158.492	-158.982	-159.713	-161.452	-160.195				30	-161.749	-159.751	-159.985	-158.862	-166.166	-171.775	-168.774	-170.211	-168.876	-171.921	-169.8	-166.002	-160.766	-161.774	-158.98	-157.042				30	-157.593	-158.223	-159.717	-160.583	-159.411	-159.913	-161.906	-160.906
	30.1	-159.953	-158.948	-160.933	-158.521	-160.073	-155.691	-158.943	-159.016	-160.227	-159.767	-160.797	-158.7	-159.067	-159.776	-161.431	-160.493				30.1	-162.43	-160.565	-158.865	-159.424	-165.987	-170.792	-169.352	-169.386	-168.52	-172.016	-169.488	-165.502	-160.155	-162.083	-159.605	-156.78				30.1	-158.078	-158.052	-159.425	-160.314	-158.909	-159.509	-161.614	-160.614
	30.2	-159.6	-158.779	-161.286	-158.603	-159.685	-156.037	-159.123	-158.77	-160.908	-159.983	-160.572	-159.095	-159.399	-159.945	-161.402	-160.55				30.2	-162.422	-161.532	-158.255	-159.803	-165.216	-169.873	-169.836	-168.447	-167.721	-172.01	-169.07	-166.032	-159.548	-161.996	-159.777	-156.531				30.2	-158.175	-158.25	-158.805	-160.259	-158.46	-159.191	-161.102	-160.102
	30.3	-158.982	-158.806	-160.764	-158.268	-159.597	-156.904	-158.787	-158.755	-160.878	-160.832	-160.612	-159.666	-159.602	-160.383	-161.393	-160.59				30.3	-162.172	-161.983	-158.619	-160.011	-164.223	-169.067	-169.983	-167.975	-167.599	-171.717	-168.789	-166.884	-159.717	-161.782	-159.056	-156.429				30.3	-158.132	-158.573	-158.316	-160.707	-158.409	-159.109	-160.954	-159.954
	30.4	-158.485	-159.01	-159.25	-157.872	-159.58	-157.519	-158.311	-158.907	-160.767	-161.843	-160.704	-160.311	-160.042	-160.936	-161.506	-160.834				30.4	-162.29	-161.51	-159.267	-160.412	-163.697	-168.184	-169.812	-167.898	-167.941	-171.521	-168.991	-167.209	-160.605	-161.525	-157.798	-156.322				30.4	-158.498	-158.712	-158.437	-161.005	-158.788	-158.998	-161.265	-160.265
	30.5	-158.178	-158.842	-157.722	-158.223	-159.348	-157.481	-158.04	-159.054	-161.183	-162.907	-160.63	-160.785	-160.884	-161.115	-161.759	-161.069				30.5	-162.334	-160.31	-159.559	-160.645	-163.825	-167.802	-169.52	-168.221	-168.025	-171.536	-169.457	-167.083	-161.364	-161.056	-156.459	-156.133				30.5	-159.178	-158.823	-158.801	-160.722	-159.39	-158.706	-161.467	-160.467
	30.6	-157.736	-158.438	-157.111	-159.208	-158.792	-157.069	-157.816	-159.266	-161.672	-163.756	-160.254	-160.77	-161.488	-160.83	-161.922	-160.747				30.6	-161.766	-159.414	-159.423	-160.568	-163.951	-168.462	-169.413	-169.165	-167.901	-171.502	-170.019	-167.084	-161.69	-160.625	-155.553	-155.893				30.6	-159.44	-159.111	-158.776	-160.287	-159.904	-158.422	-161.159	-160.159
	30.7	-157.292	-158.25	-157.37	-159.887	-158.109	-156.909	-157.581	-159.582	-161.753	-163.918	-159.802	-160.268	-161.43	-160.512	-161.919	-159.957				30.7	-161.082	-159.732	-159.064	-160.681	-163.754	-169.377	-169.577	-170.115	-167.953	-171.458	-170.607	-167.181	-161.859	-160.574	-155.672	-155.561				30.7	-159.041	-159.423	-158.295	-160.194	-159.877	-158.192	-160.534	-159.534
	30.8	-157.102	-158.282	-158.02	-159.821	-157.822	-157.237	-157.423	-159.888	-161.645	-163.375	-159.773	-159.687	-160.97	-160.238	-161.787	-159.466				30.8	-161.04	-160.841	-158.837	-161.148	-163.726	-169.529	-169.758	-170.297	-168.361	-171.872	-170.676	-167.004	-162.022	-160.721	-156.48	-155.435				30.8	-158.382	-159.646	-157.587	-160.111	-159.409	-158.172	-160.178	-159.178
	30.9	-156.762	-158.428	-158.791	-159.321	-158.178	-157.518	-157.454	-160.132	-161.452	-162.473	-160.359	-159.504	-160.415	-159.812	-161.499	-159.667				30.9	-161.464	-161.952	-159.151	-161.573	-163.906	-169.242	-169.811	-170.159	-168.562	-172.833	-170.053	-166.99	-162.143	-160.803	-156.969	-155.837				30.9	-157.839	-159.772	-156.928	-159.38	-159.159	-158.642	-160.481	-159.481
	31	-156.135	-158.624	-159.352	-158.88	-158.899	-157.2	-157.721	-160.154	-161.054	-161.643	-161.32	-159.818	-159.751	-159.444	-161.299	-160.128				31	-161.798	-162.768	-159.909	-161.687	-164.046	-169.597	-169.929	-170.278	-167.671	-173.653	-169.421	-167.408	-161.751	-160.834	-156.818	-156.503				31	-157.595	-159.89	-156.857	-158.231	-159.356	-159.394	-161.25	-160.25
	31.1	-156.254	-158.752	-159.41	-158.786	-159.561	-156.383	-157.712	-159.824	-160.883	-161.539	-162.067	-160.271	-158.763	-159.484	-161.375	-160.27				31.1	-162.049	-162.957	-160.469	-161.431	-164.325	-170.706	-170.123	-170.518	-166.173	-174.012	-169.128	-167.4	-160.64	-160.932	-156.645	-156.93				31.1	-157.79	-159.946	-157.755	-157.483	-159.734	-159.92	-162.065	-161.065
	31.2	-157.71	-158.771	-159.2	-158.956	-159.849	-155.893	-157.092	-159.513	-161.322	-162.141	-162.271	-160.614	-157.774	-159.833	-161.452	-160.096				31.2	-162.245	-162.388	-160.544	-160.84	-164.785	-171.394	-170.144	-170.889	-165.755	-174.35	-168.755	-166.392	-159.876	-161.411	-156.62	-157.065				31.2	-158.36	-159.545	-159.129	-157.507	-159.995	-159.982	-162.448	-161.448
	31.3	-159.212	-158.757	-159.102	-158.974	-159.629	-156.479	-156.666	-159.783	-161.796	-162.535	-162.336	-160.841	-157.841	-160.111	-161.265	-160.035				31.3	-162.285	-161.838	-160.423	-160.236	-165.386	-170.818	-169.713	-171.278	-166.437	-174.52	-168.082	-165.176	-160.305	-162.196	-156.261	-157.319				31.3	-159.035	-158.771	-160.129	-158.079	-159.886	-159.67	-162.131	-161.131
	31.4	-159.42	-158.785	-159.162	-158.562	-158.994	-157.662	-157.286	-160.458	-161.756	-162.37	-162.501	-160.896	-159.266	-160.055	-160.881	-160.252				31.4	-162.37	-161.897	-160.099	-159.849	-166.139	-169.646	-168.998	-171.367	-166.552	-173.994	-167.488	-164.865	-161.193	-162.295	-155.907	-157.79				31.4	-159.535	-158.388	-160.366	-158.753	-159.453	-159.437	-161.615	-160.615
	31.5	-158.725	-158.692	-159.29	-157.975	-158.301	-158.521	-158.6	-160.864	-161.563	-162.208	-162.511	-160.704	-160.876	-159.771	-160.63	-160.348				31.5	-162.663	-162.001	-159.242	-159.5	-166.765	-169.029	-168.72	-171.327	-166.014	-173.096	-167.393	-165.302	-161.428	-161.437	-156.306	-158.023				31.5	-159.588	-158.848	-160.019	-159.336	-159.039	-159.646	-161.297	-160.297
	31.6	-158.3	-158.424	-159.514	-157.697	-158.007	-158.758	-159.663	-160.956	-161.572	-162.346	-162.377	-160.273	-161.399	-159.782	-160.659	-159.965				31.6	-162.891	-161.501	-158.191	-159.084	-166.939	-169.133	-168.98	-171.113	-165.941	-172.574	-167.934	-165.73	-160.662	-160.531	-156.93	-157.686				31.6	-159.173	-159.717	-159.469	-159.94	-158.903	-159.851	-160.875	-159.875
	31.7	-158.74	-158.402	-159.818	-158.041	-158.262	-158.255	-159.983	-160.84	-161.319	-162.691	-162.326	-159.732	-160.703	-160.24	-160.49	-159.417				31.7	-162.662	-160.729	-158.008	-158.748	-166.619	-169.369	-169.289	-170.476	-166.324	-172.631	-168.877	-165.956	-159.526	-159.964	-156.833	-157.09				31.7	-158.787	-160.151	-158.875	-160.583	-159.074	-159.442	-160.5	-159.5
	31.8	-159.613	-158.845	-159.978	-158.956	-158.68	-157.236	-159.642	-160.243	-160.483	-163.228	-162.24	-159.432	-159.718	-160.654	-159.803	-159.236				31.8	-162.09	-160.703	-159.147	-158.891	-165.987	-169.433	-169.522	-169.822	-166.594	-172.936	-169.574	-166.075	-159.008	-159.736	-156.346	-156.511				31.8	-158.926	-159.975	-158.475	-161.125	-159.25	-158.591	-160.746	-159.746
	31.9	-159.958	-159.253	-159.844	-159.928	-158.722	-156.396	-158.919	-159.342	-159.556	-163.593	-162.014	-159.532	-159.397	-160.793	-159.157	-159.673				31.9	-161.469	-161.71	-160.598	-159.823	-165.557	-169.595	-169.65	-169.591	-167.017	-172.784	-169.613	-166.165	-159.253	-160.39	-156.219	-155.869				31.9	-159.29	-159.617	-158.715	-161.512	-159.062	-157.956	-161.459	-160.459
	32	-159.437	-159.268	-159.538	-160.149	-158.375	-156.202	-158.282	-158.707	-159.127	-163.308	-161.965	-159.545	-159.689	-160.601	-159.264	-160.505				32	-160.825	-162.612	-160.991	-161.059	-165.719	-170.157	-169.658	-169.556	-167.747	-171.585	-169.367	-166.339	-159.419	-161.728	-156.349	-155.565				32	-159.319	-159.427	-159.24	-161.735	-158.694	-157.929	-161.877	-160.877
	32.1	-158.59	-159.147	-159.447	-159.497	-158.253	-156.537	-158.084	-158.637	-159.483	-162.545	-162.27	-159.178	-160.024	-160.139	-159.933	-161.226				32.1	-160.403	-162.526	-160.139	-161.84	-165.909	-170.984	-169.696	-169.482	-168.051	-170.255	-169.425	-166.497	-159.095	-162.503	-156.522	-155.947				32.1	-159.296	-159.366	-159.329	-161.75	-158.626	-158.445	-161.76	-160.76
	32.2	-157.985	-159.079	-159.729	-158.951	-158.852	-156.853	-158.04	-159.135	-160.607	-161.839	-162.553	-159.036	-160.23	-159.959	-160.349	-161.421				32.2	-160.645	-161.845	-159.115	-161.856	-165.323	-171.628	-169.881	-169.619	-167.736	-170.304	-169.949	-166.469	-158.948	-162.303	-157.108	-156.39				32.2	-159.637	-159.032	-159	-161.516	-158.881	-159.398	-161.664	-160.664
	32.3	-157.599	-158.924	-159.958	-159.247	-159.863	-156.762	-157.883	-159.944	-161.74	-161.464	-162.455	-159.388	-160.277	-160.193	-160.305	-161.108				32.3	-161.84	-161.216	-158.816	-161.259	-164.174	-171.901	-170.176	-169.874	-167.697	-171.32	-170.684	-166.288	-159.277	-161.876	-158.12	-156.347				32.3	-159.873	-158.431	-158.677	-161.09	-159.158	-160.416	-161.885	-160.885
	32.4	-157.102	-158.665	-159.687	-159.781	-160.543	-156.409	-157.732	-160.564	-161.713	-161.368	-162.064	-159.742	-160.064	-160.38	-160.245	-160.682				32.4	-163.569	-160.821	-159.095	-160.603	-163.476	-172.043	-170.46	-169.928	-168.359	-172.214	-171.074	-166.179	-159.541	-161.776	-158.838	-156.201				32.4	-159.701	-158.123	-158.674	-160.601	-159.251	-160.866	-162	-161
	32.5	-156.573	-158.544	-159.147	-159.584	-160.532	-156.085	-157.564	-160.65	-160.418	-161.315	-161.712	-160.067	-159.74	-160.436	-160.546	-160.541				32.5	-164.498	-160.694	-159.602	-160.305	-163.832	-172.061	-170.91	-169.967	-168.963	-172.817	-170.756	-166.262	-159.544	-161.867	-158.893	-156.236				32.5	-159.545	-158.336	-159.042	-160.311	-159.14	-160.752	-161.758	-160.758
	32.6	-156.491	-158.667	-158.838	-158.638	-160.161	-155.824	-157.225	-160.286	-159.166	-161.199	-161.533	-160.523	-159.604	-160.521	-161.147	-160.614				32.6	-163.951	-160.975	-160.145	-160.362	-164.901	-171.713	-171.672	-170.059	-168.837	-173.038	-170.287	-166.111	-159.729	-161.74	-158.817	-155.927				32.6	-159.483	-158.583	-159.795	-160.281	-159.072	-160.573	-161.426	-160.426
	32.7	-156.995	-158.649	-158.884	-157.633	-159.955	-155.645	-156.757	-159.81	-159.051	-161.276	-161.373	-160.748	-159.751	-160.607	-161.595	-160.509				32.7	-162.788	-161.623	-160.368	-160.541	-165.929	-171.12	-172.151	-170.142	-168.345	-172.912	-170.437	-165.481	-160.412	-161.373	-158.992	-155.159				32.7	-159.303	-158.557	-160.78	-160.06	-159.031	-160.34	-161.228	-160.228
	32.8	-157.694	-158.366	-159.239	-157.178	-160.019	-155.712	-156.555	-159.615	-159.622	-161.699	-161.103	-160.555	-160.22	-160.484	-161.823	-160.175				32.8	-162.13	-162.003	-160.191	-160.455	-166.293	-170.776	-171.686	-170.396	-167.968	-172.869	-171.055	-164.905	-161.387	-161.392	-159.081	-154.755				32.8	-159.144	-158.656	-161.347	-159.465	-158.737	-159.788	-161.108	-160.108
	32.9	-158.054	-158.302	-159.621	-157.381	-160.045	-156.186	-156.925	-159.92	-160.008	-162.348	-160.778	-160.255	-160.939	-160.142	-162.122	-159.805				32.9	-162.088	-161.606	-159.752	-159.849	-165.983	-170.791	-170.729	-170.729	-167.691	-172.907	-171.493	-164.876	-162.137	-162.227	-158.697	-155.51				32.9	-159.071	-158.961	-160.989	-159.104	-158.29	-159.099	-160.955	-159.955
	33	-157.974	-158.568	-159.62	-157.701	-159.674	-156.967	-157.577	-160.319	-160.098	-162.88	-160.717	-160.135	-161.459	-160.136	-162.276	-159.539				33	-162.09	-160.955	-159.405	-159.042	-165.682	-171.073	-170.02	-170.831	-167.227	-172.708	-171.608	-165.424	-162.047	-163.353	-157.879	-156.865				33	-158.75	-159.097	-160.052	-159.338	-157.962	-158.542	-160.703	-159.703
	33.1	-158.002	-158.755	-159.322	-157.67	-159.03	-157.517	-157.825	-160.294	-160.404	-162.726	-161.278	-160.117	-161.452	-160.76	-161.867	-159.603				33.1	-161.938	-160.636	-159.407	-158.721	-165.623	-171.686	-169.516	-170.845	-166.633	-172.526	-171.604	-166.392	-160.904	-163.917	-156.796	-157.232				33.1	-158.148	-159.162	-159.368	-159.583	-157.844	-158.254	-160.429	-159.429
	33.2	-158.367	-158.714	-159.194	-157.48	-158.628	-157.626	-157.472	-159.841	-161.275	-161.784	-162.26	-160.034	-161.145	-161.451	-161.118	-160.068				33.2	-161.755	-160.373	-159.644	-159.017	-165.089	-172.465	-169.05	-171.25	-166.589	-172.688	-171.35	-167.41	-159.364	-163.556	-155.731	-156.263				33.2	-157.767	-159.246	-159.106	-159.414	-157.968	-158.628	-160.325	-159.325
	33.3	-158.659	-158.582	-159.371	-157.506	-158.562	-157.751	-157.268	-159.326	-162.305	-160.657	-162.886	-159.852	-160.706	-161.681	-160.578	-160.499				33.3	-161.449	-159.677	-159.89	-159.479	-163.993	-172.91	-168.669	-172.01	-167.21	-172.928	-170.61	-168.002	-158.378	-162.376	-155.404	-155.494				33.3	-157.865	-158.991	-158.848	-159.13	-158.352	-159.714	-160.637	-159.637
	33.4	-158.606	-158.525	-159.45	-157.608	-158.634	-158.026	-157.856	-159.226	-162.78	-159.818	-162.479	-159.69	-159.933	-161.776	-160.355	-160.525				33.4	-161.013	-158.751	-159.966	-159.997	-163.458	-172.563	-168.18	-172.51	-167.646	-172.926	-169.628	-168.189	-158.451	-160.831	-156.199	-155.797				33.4	-158.194	-158.387	-158.768	-158.929	-158.815	-160.547	-161.275	-160.275
	33.5	-158.37	-158.747	-159.303	-157.51	-158.781	-158.206	-158.587	-159.768	-162.443	-159.481	-161.306	-159.913	-158.988	-161.936	-160.316	-160.382				33.5	-160.627	-158.52	-160.016	-160.977	-163.918	-171.562	-167.713	-172.223	-167.586	-172.657	-169.065	-168.23	-159.282	-159.777	-157.363	-156.118				33.5	-158.589	-158.086	-159.059	-158.695	-159.104	-160.502	-161.412	-160.412
	33.6	-158.286	-159.276	-159.313	-157.538	-159.071	-158.315	-158.516	-160.663	-161.681	-159.786	-160.413	-160.655	-158.587	-161.668	-160.456	-160.301				33.6	-160.438	-159.28	-160.374	-162.401	-164.353	-170.928	-167.839	-171.224	-167.432	-172.144	-169.187	-168.098	-159.768	-159.747	-157.792	-155.554				33.6	-159.069	-158.299	-159.313	-158.614	-159.282	-160.239	-160.648	-159.648
	33.7	-158.357	-159.746	-159.64	-158.024	-159.477	-158.46	-157.565	-161.172	-161.092	-160.274	-160.328	-161.169	-159.028	-161.042	-160.76	-160.025				33.7	-160.362	-160.116	-160.747	-163.244	-164.27	-171.153	-168.462	-170.029	-167.209	-171.383	-169.607	-167.82	-159.294	-160.363	-157.362	-154.532				33.7	-159.511	-158.496	-159.415	-158.794	-159.52	-160.214	-159.833	-158.833
	33.8	-158.431	-159.879	-160.019	-158.464	-159.68	-158.536	-156.134	-160.835	-160.728	-160.446	-160.764	-160.698	-159.741	-160.748	-160.963	-159.273				33.8	-160.256	-160.298	-160.761	-162.806	-164.475	-171.283	-169.161	-169.163	-167.04	-170.723	-170.006	-167.667	-158.743	-161.077	-156.898	-154.153				33.8	-159.652	-158.569	-159.591	-158.902	-159.636	-160.111	-159.731	-158.731
	33.9	-158.564	-159.755	-160.455	-158.254	-159.414	-158.272	-155.075	-159.968	-160.203	-160.561	-161.281	-159.936	-159.914	-160.968	-160.878	-158.175				33.9	-160.53	-160.306	-160.832	-161.731	-165.046	-170.646	-169.827	-169.118	-167.218	-170.744	-170.4	-167.392	-159.349	-161.733	-156.869	-155.402				33.9	-159.557	-158.903	-159.725	-158.908	-159.198	-159.756	-159.953	-158.953
	34	-158.718	-159.357	-160.994	-157.771	-158.915	-157.56	-155.181	-159.078	-159.617	-160.815	-161.523	-159.888	-159.249	-161.361	-160.547	-157.206				34	-161.564	-160.71	-161.056	-160.884	-165.133	-169.873	-170.298	-169.845	-167.354	-171.581	-170.678	-166.647	-161.34	-162.083	-156.903	-157.727				34	-159.494	-159.367	-159.622	-159.076	-158.129	-159.337	-159.919	-158.919
	34.1	-158.915	-158.805	-161.183	-157.85	-158.651	-156.88	-156.405	-158.573	-159.512	-161.026	-161.345	-160.429	-158.25	-161.502	-159.952	-157.042				34.1	-162.763	-161.101	-160.89	-160.439	-164.664	-169.76	-170.525	-170.708	-167.122	-172.725	-170.844	-166.229	-163.512	-162.047	-156.78	-159.267				34.1	-159.316	-159.456	-159.431	-159.347	-157.058	-159.169	-159.835	-158.835
	34.2	-159.311	-158.47	-160.916	-158.652	-158.907	-156.796	-157.949	-158.551	-159.841	-161.341	-160.962	-161.049	-157.727	-161.319	-159.403	-158.258				34.2	-163.166	-161.263	-160.264	-160.648	-164.079	-170.18	-170.504	-171.218	-167.147	-173.283	-171.155	-166.828	-164.237	-162.258	-156.845	-159.115				34.2	-158.905	-159.276	-159.305	-159.419	-156.858	-159.339	-159.932	-158.932
	34.3	-159.708	-158.298	-160.535	-159.567	-159.466	-157.193	-158.906	-158.561	-159.864	-161.998	-160.678	-161.423	-157.995	-161.07	-159.53	-160.258				34.3	-162.627	-161.797	-159.529	-161.261	-163.594	-170.573	-170.236	-171.117	-167.692	-172.876	-171.131	-167.798	-163.496	-162.828	-157.148	-158.093				34.3	-158.535	-159.303	-159.19	-159.133	-157.733	-159.593	-160.035	-159.035
	34.4	-159.679	-158.193	-160.135	-159.771	-159.644	-157.437	-159.101	-158.358	-159.499	-162.616	-160.587	-161.415	-158.792	-160.657	-160.282	-161.429				34.4	-161.955	-162.606	-159.107	-161.112	-163.567	-170.934	-169.943	-170.357	-168.216	-172.109	-170.215	-168.169	-162.42	-162.861	-157.301	-157.272				34.4	-158.374	-159.664	-158.906	-158.796	-158.806	-159.695	-160.11	-159.11
	34.5	-159.132	-158.425	-159.725	-159.138	-159.197	-157.113	-158.983	-158.376	-159.478	-162.918	-160.612	-161.122	-159.617	-159.875	-161.119	-161.324				34.5	-161.969	-162.844	-159.278	-160.038	-164.329	-171.536	-169.816	-169.272	-168.573	-171.742	-169.361	-167.756	-161.735	-162.306	-157.248	-156.622				34.5	-158.49	-160.044	-158.546	-158.796	-159.205	-159.821	-160.268	-159.268
	34.6	-158.594	-158.886	-159.425	-158.519	-158.733	-156.477	-158.646	-158.806	-159.899	-163.089	-160.784	-160.94	-160.193	-159.004	-161.723	-160.702				34.6	-162.668	-162.427	-160.035	-159.397	-165.623	-172.511	-169.869	-168.338	-168.888	-171.934	-169.659	-167.093	-161.891	-162.025	-157.14	-155.742				34.6	-159.07	-160.119	-158.615	-159.113	-159.076	-159.935	-160.531	-159.531
	34.7	-158.78	-159.184	-159.323	-158.664	-158.7	-155.975	-158.134	-159.142	-160.256	-162.943	-161.175	-161.053	-160.609	-158.478	-161.855	-160.067				34.7	-163.363	-161.799	-161.042	-159.817	-166.718	-173.525	-170.098	-167.958	-168.945	-172.453	-170.651	-166.537	-162.71	-162.016	-156.866	-155.133				34.7	-159.996	-159.945	-159.219	-159.563	-158.978	-159.564	-160.833	-159.833
	34.8	-159.693	-159.414	-159.443	-159.268	-158.834	-155.811	-157.83	-159.186	-160.434	-162.4	-161.603	-160.846	-160.89	-158.721	-161.332	-159.779				34.8	-163.438	-161.037	-161.499	-160.386	-167.019	-173.531	-170.21	-168.399	-168.931	-172.966	-171.326	-166.226	-163.113	-161.542	-156.662	-155.345				34.8	-160.586	-159.685	-159.831	-159.986	-159.166	-158.778	-161.008	-160.008
	34.9	-160.311	-159.714	-159.567	-159.701	-158.983	-156.106	-157.785	-159.25	-160.726	-161.966	-161.883	-159.808	-160.962	-159.776	-160.477	-160.023				34.9	-162.782	-160.351	-160.888	-160.25	-166.347	-172.42	-169.965	-169.31	-169.218	-173.221	-171.226	-166.368	-162.438	-160.581	-157.031	-156.071				34.9	-160.279	-159.467	-160.005	-160.159	-159.661	-158.198	-160.852	-159.852
	35	-159.943	-159.804	-159.427	-160.007	-159.356	-156.757	-157.855	-159.427	-161.278	-161.844	-162.006	-158.609	-160.999	-161.114	-159.965	-160.459				35	-161.658	-160.359	-159.666	-159.736	-164.993	-171.673	-169.713	-169.885	-169.415	-173.213	-170.564	-167.115	-161.254	-160.156	-157.603	-156.936				35	-159.323	-159.396	-159.71	-160.068	-160.013	-158.362	-160.471	-159.471
	35.1	-159.185	-159.578	-159.211	-160.232	-159.673	-157.295	-157.995	-159.587	-161.805	-161.67	-162.171	-158.234	-161.087	-162.338	-160.075	-160.575				35.1	-160.619	-160.977	-158.776	-159.587	-163.694	-172.052	-169.723	-169.923	-169.099	-173.113	-169.819	-168.1	-160.648	-160.845	-157.564	-157.606				35.1	-158.461	-159.471	-159.28	-159.968	-159.578	-159.137	-160.273	-159.273
	35.2	-158.656	-159.341	-159.221	-160.028	-159.309	-157.355	-157.893	-159.857	-161.932	-161.099	-162.362	-158.83	-161.084	-163.032	-160.558	-160.232				35.2	-160.454	-161.399	-158.762	-160.06	-163.065	-172.438	-169.967	-169.834	-168.534	-173.036	-169.122	-168.598	-160.974	-161.742	-156.943	-157.543				35.2	-158.12	-159.814	-159.106	-160.026	-158.69	-159.691	-160.475	-159.475
	35.3	-158.057	-159.212	-159.142	-159.504	-158.617	-157.091	-157.606	-160.438	-161.434	-160.578	-162.137	-159.914	-161.152	-162.644	-161.127	-159.642				35.3	-161.351	-161.416	-159.032	-160.944	-162.962	-171.783	-170.522	-169.952	-168.132	-172.944	-168.31	-168.424	-161.647	-161.708	-156.626	-157.003				35.3	-158.308	-160.315	-159.004	-160.151	-158.381	-159.559	-160.729	-159.729
	35.4	-157.108	-159.08	-158.606	-159.068	-158.548	-156.883	-157.584	-161.008	-160.497	-160.942	-161.486	-160.977	-161.175	-161.564	-161.492	-159.1				35.4	-162.555	-161.472	-158.874	-161.58	-162.908	-170.59	-171.033	-170.429	-167.971	-172.675	-167.691	-167.902	-162.003	-160.999	-156.933	-156.739				35.4	-158.892	-160.541	-158.924	-159.999	-158.729	-159.137	-160.815	-159.815
	35.5	-156.373	-159.148	-158.103	-158.804	-159.034	-156.956	-157.763	-160.853	-159.905	-162.081	-161.071	-161.642	-160.51	-160.739	-161.473	-158.924				35.5	-163.077	-161.654	-158.689	-161.482	-162.884	-170.058	-170.716	-171.06	-167.903	-172.421	-167.897	-167.323	-161.709	-160.59	-157.319	-156.542				35.5	-159.475	-160.346	-159.259	-159.478	-158.895	-159.029	-161.076	-160.076
	35.6	-156.46	-159.55	-158.372	-158.713	-159.131	-157.297	-158.041	-159.871	-160.079	-162.964	-161.27	-161.758	-159.234	-160.447	-161.366	-159.053				35.6	-162.696	-161.799	-158.97	-160.961	-163.177	-170.503	-169.687	-171.212	-168.021	-172.823	-169.068	-167.081	-160.805	-160.583	-157.46	-155.901				35.6	-159.537	-159.822	-159.619	-159.091	-158.454	-159.43	-161.56	-160.56
	35.7	-157.243	-159.829	-159.223	-158.861	-158.534	-157.639	-158.454	-158.779	-160.571	-162.948	-161.6	-161.464	-158.051	-160.535	-161.587	-159.135				35.7	-162.023	-161.829	-159.405	-160.637	-163.83	-171.148	-169.031	-170.923	-168.422	-173.645	-170.636	-167.346	-159.829	-160.732	-157.474	-155.215				35.7	-159.147	-159.114	-159.398	-159.145	-157.746	-159.968	-161.836	-160.836
	35.8	-158.212	-159.56	-159.818	-159.002	-157.962	-157.874	-158.751	-158.211	-160.702	-162.356	-161.452	-160.795	-157.477	-160.824	-162.004	-159				35.8	-161.356	-161.594	-159.582	-160.946	-164.447	-171.543	-169.317	-170.757	-168.737	-173.874	-171.774	-167.718	-159.655	-161.017	-157.347	-155.19				35.8	-158.824	-158.599	-159.004	-159.491	-157.213	-160.236	-161.699	-160.699
	35.9	-158.633	-158.848	-159.849	-158.946	-158.181	-157.947	-158.739	-158.263	-160.413	-162.018	-161.117	-159.928	-157.646	-160.887	-161.97	-158.771				35.9	-160.703	-161.247	-159.543	-161.685	-164.508	-172.101	-169.935	-170.568	-168.447	-173.46	-172.087	-167.81	-160.434	-161.357	-157.032	-155.905				35.9	-158.87	-158.573	-158.907	-159.99	-157.397	-160.142	-161.329	-160.329
	36	-158.261	-158.314	-159.603	-158.997	-159.209	-157.768	-158.51	-158.847	-160.405	-162.331	-161.24	-159.393	-158.141	-160.529	-161.257	-158.759				36	-160.51	-161.35	-159.745	-162.147	-164.072	-173.064	-170.128	-170.022	-167.578	-173.215	-171.789	-167.636	-161.199	-161.692	-156.667	-156.654				36	-159.097	-158.976	-158.661	-160.515	-158.491	-159.664	-160.948	-159.948
	36.1	-157.856	-158.556	-159.492	-159.358	-160.377	-157.502	-158.123	-159.762	-161.041	-162.784	-161.753	-159.364	-158.573	-160.31	-160.438	-159.231				36.1	-161.039	-161.898	-160.462	-162.097	-163.653	-173.871	-169.974	-169.453	-166.944	-173.442	-171.326	-167.425	-161.184	-162.003	-156.563	-156.751				36.1	-159.103	-159.698	-157.885	-160.894	-159.567	-159.08	-160.591	-159.591
	36.2	-157.917	-159.289	-159.749	-159.879	-160.93	-157.331	-157.508	-160.436	-161.704	-162.798	-162.193	-159.591	-159.05	-160.632	-160.185	-159.906				36.2	-161.713	-162.215	-161.048	-161.606	-163.624	-173.892	-170.008	-169.147	-167.109	-173.701	-170.751	-167.4	-161.085	-162.317	-157.242	-156.406				36.2	-158.935	-160.551	-157.292	-160.95	-159.743	-158.872	-160.317	-159.317
	36.3	-158.071	-159.627	-160.113	-160.227	-160.605	-157.43	-156.965	-160.202	-161.699	-162.567	-162.346	-159.846	-159.669	-161.089	-160.472	-160.175				36.3	-161.739	-162.007	-160.931	-160.581	-163.937	-172.976	-170.426	-168.914	-167.71	-173.79	-170.023	-167.588	-161.877	-162.618	-158.303	-156.274				36.3	-158.911	-160.891	-157.583	-160.667	-159.448	-158.916	-160.236	-159.236
	36.4	-158.166	-159.271	-160.362	-160.208	-159.67	-157.825	-156.92	-159.048	-161.312	-162.408	-161.859	-160.25	-160.232	-161.088	-160.744	-159.757				36.4	-161.228	-161.466	-160.688	-159.532	-164.145	-171.312	-170.861	-168.841	-168.278	-173.929	-169.695	-167.813	-162.908	-162.654	-158.583	-156.459				36.4	-159.036	-160.239	-158.343	-160.276	-159.311	-158.848	-160.238	-159.238
	36.5	-158.559	-158.677	-160.581	-160.047	-158.766	-158.082	-157.195	-157.717	-161.158	-162.198	-160.657	-160.864	-160.448	-160.451	-160.863	-158.963				36.5	-161.094	-160.895	-160.737	-159.453	-163.992	-169.605	-170.741	-169.135	-168.755	-174.048	-169.949	-167.794	-162.812	-162.427	-158.078	-156.668				36.5	-159.259	-159.232	-158.691	-159.848	-159.303	-158.78	-160.097	-159.097
	36.6	-159.372	-158.186	-160.505	-159.828	-158.487	-157.778	-157.365	-157.011	-161.121	-161.891	-159.891	-161.21	-160.152	-159.738	-161.078	-158.492				36.6	-161.615	-160.762	-160.601	-160.263	-163.749	-168.91	-169.995	-169.459	-169.327	-174.037	-170.142	-167.397	-161.489	-162.131	-157.84	-156.671				36.6	-159.577	-158.881	-158.324	-159.412	-159.311	-158.776	-159.822	-158.822
	36.7	-160.149	-157.704	-159.855	-159.279	-158.76	-156.967	-157.432	-157.219	-160.883	-161.556	-160.349	-161.14	-159.567	-159.683	-161.159	-158.678				36.7	-162.033	-160.991	-160.175	-160.9	-163.942	-169.518	-169.326	-169.474	-169.865	-173.999	-169.94	-167.12	-160.088	-161.67	-158.415	-156.219				36.7	-159.708	-158.953	-158.037	-159.284	-159.338	-158.64	-159.577	-158.577
	36.8	-160.297	-157.401	-158.928	-158.556	-159.151	-156.257	-157.398	-157.89	-160.558	-161.212	-161.278	-161.167	-159.364	-160.142	-160.808	-159.213				36.8	-161.823	-160.798	-159.825	-161.26	-164.788	-170.566	-169.404	-169.282	-169.866	-173.797	-169.389	-167.268	-159.828	-160.908	-159.349	-155.327				36.8	-159.529	-158.553	-158.564	-159.606	-159.256	-158.378	-159.515	-158.515
	36.9	-159.721	-157.645	-158.101	-158.371	-159.518	-156.353	-157.196	-158.291	-160.417	-161.178	-161.78	-161.574	-159.69	-160.633	-160.489	-159.638				36.9	-161.388	-160.002	-159.695	-161.977	-165.71	-171.311	-170.007	-169.26	-169.374	-173.311	-168.723	-167.497	-161.104	-159.898	-159.712	-154.713				36.9	-159.462	-158.018	-159.341	-160.086	-158.953	-158.312	-159.779	-158.779
	37	-158.868	-158.061	-157.554	-158.965	-159.667	-157.106	-157.149	-158.425	-160.532	-161.424	-161.726	-162.128	-159.668	-161.223	-160.748	-159.889				37	-161.324	-159.318	-159.599	-162.694	-165.925	-171.913	-170.39	-169.789	-169.002	-172.923	-168.47	-167.56	-162.95	-159.185	-159.11	-154.959				37	-159.757	-158.195	-159.518	-160.319	-158.708	-158.605	-160.051	-159.051
	37.1	-158.092	-158.111	-157.49	-159.783	-159.303	-157.853	-157.377	-158.668	-160.796	-161.166	-161.431	-162.31	-158.876	-161.81	-161.268	-160.386				37.1	-161.597	-159.157	-159.318	-162.374	-165.471	-172.606	-170.061	-170.581	-168.916	-173.033	-168.723	-167.388	-163.554	-159.503	-157.92	-155.498				37.1	-160.038	-158.816	-159.173	-160.266	-158.896	-158.937	-159.818	-158.818
	37.2	-157.446	-158.047	-157.773	-160.17	-158.652	-158.392	-157.543	-158.998	-161.023	-160.32	-161.168	-161.965	-158.203	-161.97	-161.417	-161.017				37.2	-161.69	-159.288	-158.742	-160.869	-164.962	-173.174	-169.378	-170.953	-168.654	-173.225	-168.886	-166.985	-162.228	-160.631	-156.805	-155.585				37.2	-159.853	-159.085	-158.767	-160.139	-159.442	-159.068	-159.331	-158.331
	37.3	-157.135	-158.379	-158.064	-159.955	-158.125	-158.763	-157.621	-159.235	-160.975	-159.845	-161.027	-161.49	-158.304	-161.553	-161.131	-161.083				37.3	-161.715	-159.488	-158.08	-159.153	-164.77	-173.4	-169.206	-170.613	-168.202	-172.945	-168.83	-166.538	-160.365	-161.576	-156.262	-155.498				37.3	-159.444	-159.019	-158.493	-159.751	-159.924	-159.247	-159.372	-158.372
	37.4	-157.258	-159.084	-158.421	-159.444	-157.997	-158.887	-157.968	-159.42	-160.705	-160.104	-161.051	-161.062	-158.817	-160.914	-160.7	-160.404				37.4	-162.373	-159.651	-157.863	-158.062	-164.607	-173.05	-169.717	-169.779	-167.975	-172.558	-168.976	-166.388	-159.736	-161.731	-156.059	-155.74				37.4	-159.429	-159.086	-158.281	-159.101	-159.941	-159.609	-160.095	-159.095
	37.5	-157.498	-159.615	-158.805	-159.117	-158.443	-158.55	-158.456	-159.534	-160.552	-160.481	-161.247	-160.546	-159.364	-160.623	-160.417	-159.45				37.5	-163.229	-159.577	-158.397	-157.886	-164.19	-171.946	-170.246	-169.082	-168.089	-172.491	-169.293	-166.636	-160.48	-161.322	-155.765	-156.171				37.5	-159.737	-159.214	-158.055	-158.804	-159.445	-159.791	-160.841	-159.841
	37.6	-157.659	-159.484	-158.807	-159.437	-159.219	-157.808	-158.502	-159.427	-160.747	-160.606	-161.427	-160.024	-159.856	-160.797	-160.362	-158.905				37.6	-163.049	-159.399	-159.421	-158.781	-163.764	-170.31	-170.202	-168.981	-168.299	-172.507	-169.422	-166.781	-161.657	-160.814	-155.498	-156.391				37.6	-159.772	-159.117	-157.786	-159.135	-158.667	-159.6	-161.067	-160.067
	37.7	-157.781	-158.882	-158.508	-160.199	-159.736	-157.197	-158.154	-159.306	-161.065	-160.826	-161.314	-159.927	-160.086	-161.114	-160.323	-159.218				37.7	-161.815	-159.541	-160.298	-160.297	-163.331	-168.699	-169.568	-169.111	-168.306	-172.414	-169.278	-166.422	-162.454	-160.171	-155.489	-156.237				37.7	-159.356	-158.942	-157.397	-159.78	-157.993	-159.244	-160.815	-159.815
	37.8	-158.027	-158.561	-158.407	-160.613	-159.629	-157.082	-158.03	-159.628	-161.066	-161.394	-160.898	-160.458	-159.969	-161.219	-160.258	-159.965				37.8	-160.817	-160.032	-160.557	-161.424	-163.004	-167.754	-169.033	-168.853	-168.079	-172.355	-169.317	-165.949	-162.418	-159.326	-155.662	-155.739				37.8	-158.667	-158.994	-157.025	-160.276	-157.833	-158.933	-160.493	-159.493
	37.9	-158.394	-158.722	-158.43	-160.353	-159.147	-157.377	-158.349	-160.361	-160.906	-162.106	-160.476	-161.095	-159.707	-160.997	-160.44	-160.128				37.9	-160.946	-160.515	-160.245	-161.7	-163.061	-167.881	-169.22	-168.363	-167.671	-172.474	-169.814	-166.027	-161.811	-158.765	-155.728	-155.252				37.9	-158.011	-159.186	-156.981	-160.265	-158.147	-158.827	-160.333	-159.333
	38	-158.457	-158.8	-158.067	-159.708	-158.886	-157.725	-158.536	-160.77	-161.026	-162.751	-160.422	-161.176	-159.506	-160.596	-161.016	-159.568				38	-161.826	-160.771	-159.766	-161.487	-163.151	-168.994	-169.669	-168.299	-167.128	-172.799	-170.104	-166.682	-161.409	-158.584	-155.479	-155.204				38	-157.829	-159.184	-157.37	-159.812	-158.57	-159.023	-160.029	-159.029
	38.1	-157.985	-158.559	-157.52	-159.041	-159.123	-157.633	-158.029	-160.289	-161.291	-163.04	-160.757	-160.647	-159.56	-160.383	-161.684	-159.103				38.1	-162.605	-161.001	-159.24	-161.374	-163.024	-170.497	-169.559	-168.804	-166.757	-173.343	-169.894	-167.283	-161.393	-158.231	-155.208	-155.627				38.1	-158.051	-158.901	-157.981	-159.369	-158.997	-159.351	-159.492	-158.492
	38.2	-157.602	-158.175	-157.755	-158.432	-159.378	-157.046	-157.311	-159.376	-161.515	-162.8	-161.22	-159.808	-159.949	-160.479	-162.188	-158.909				38.2	-162.718	-161.379	-158.637	-161.425	-162.866	-171.663	-169.16	-169.405	-166.737	-174.045	-169.897	-167.25	-161.442	-157.752	-155.546	-156.457				38.2	-158.178	-158.819	-158.59	-159.209	-159.272	-159.648	-159.322	-158.322
	38.3	-157.79	-157.949	-158.979	-158.003	-159.191	-156.727	-157.279	-158.962	-161.799	-162.586	-161.572	-158.81	-160.402	-160.435	-162.608	-158.516				38.3	-162.306	-161.57	-158.541	-161.328	-162.666	-172.061	-169.197	-169.693	-166.871	-174.492	-170.193	-166.669	-161.473	-157.764	-156.582	-157.49				38.3	-158.12	-159.351	-159.186	-159.191	-159.097	-159.886	-159.772	-158.772
	38.4	-157.958	-158.26	-160.107	-158.24	-158.898	-157.266	-157.965	-159.02	-161.977	-162.765	-161.726	-158.118	-160.446	-160.095	-162.654	-158.153				38.4	-162.015	-161.359	-159.349	-161.133	-162.68	-171.672	-169.469	-169.59	-166.991	-174.312	-170.091	-166.035	-161.515	-158.403	-157.655	-158.047				38.4	-158.164	-160.042	-159.792	-159.238	-158.526	-159.967	-160.242	-159.242
	38.5	-157.632	-159.103	-160.16	-159.228	-158.944	-158.057	-158.66	-158.844	-161.89	-162.766	-161.675	-158.379	-159.902	-159.983	-162.005	-158.515				38.5	-161.958	-161.019	-160.282	-161.217	-163.358	-170.938	-169.55	-169.313	-167.155	-173.923	-169.799	-165.732	-161.521	-159.463	-158.004	-157.848				38.5	-158.204	-160.126	-160.232	-159.466	-157.975	-159.769	-160.348	-159.348
	38.6	-157.119	-159.878	-159.524	-160.184	-159.268	-158	-158.912	-158.44	-161.846	-162.124	-161.462	-159.384	-159.122	-160.455	-161.161	-159.581				38.6	-161.69	-160.712	-160.6	-161.578	-164.515	-170.339	-169.733	-169.297	-167.557	-173.828	-169.877	-166.029	-161.682	-160.651	-157.456	-157.334				38.6	-157.823	-159.338	-160.288	-159.9	-157.772	-159.431	-160.276	-159.276
	38.7	-156.768	-159.93	-159.12	-160.41	-159.505	-157.163	-158.759	-158.42	-162.051	-161.413	-161.232	-160.278	-158.501	-161.107	-160.702	-160.631				38.7	-161.181	-160.235	-160.52	-161.934	-165.36	-169.854	-170.14	-169.663	-168.289	-173.812	-169.96	-166.956	-162.138	-161.507	-156.745	-156.817				38.7	-157.107	-158.204	-160.042	-160.208	-157.918	-159.31	-160.182	-159.182
	38.8	-157.029	-159.277	-158.957	-159.92	-159.384	-156.71	-158.236	-158.929	-162.377	-161.541	-161.085	-160.528	-158.352	-161.336	-160.671	-160.981				38.8	-160.942	-159.597	-160.236	-162.076	-165.277	-169.244	-170.303	-169.857	-168.837	-173.486	-169.331	-168.056	-162.523	-161.836	-156.659	-156.605				38.8	-156.686	-157.699	-159.73	-159.979	-158.325	-159.48	-159.969	-158.969
	38.9	-157.906	-158.508	-158.691	-159.103	-159.051	-157.247	-157.679	-159.445	-162.573	-162.419	-160.955	-160.315	-158.856	-161.217	-160.978	-160.362				38.9	-161.196	-159.465	-159.536	-161.832	-164.317	-168.604	-170.18	-169.506	-168.493	-172.753	-168.286	-168.62	-162.365	-161.83	-157.152	-156.782				38.9	-156.963	-158.169	-159.264	-159.454	-158.824	-159.581	-159.486	-158.486
	39	-158.582	-158.098	-158.586	-158.546	-158.996	-158.219	-157.747	-159.493	-162.435	-163.168	-160.834	-160.005	-159.603	-161.145	-161.304	-159.347				39	-161.682	-160.117	-158.614	-161.292	-163.278	-168.426	-170.173	-169.055	-167.601	-171.962	-167.836	-168.406	-161.631	-161.396	-157.71	-156.72				39	-157.63	-159.17	-158.573	-159.245	-159.214	-159.519	-158.85	-157.85
	39.1	-158.735	-158.2	-158.77	-158.725	-159.286	-158.757	-158.298	-159.199	-161.963	-163.471	-160.848	-159.806	-160.025	-161.018	-161.249	-159.017				39.1	-161.928	-160.67	-157.894	-160.714	-163.132	-169.212	-170.252	-169.089	-167.426	-171.773	-168.25	-167.691	-160.911	-160.456	-157.957	-156.136				39.1	-158.056	-160.012	-157.901	-159.471	-159.44	-159.413	-158.423	-157.423
	39.2	-158.93	-158.624	-158.73	-159.504	-159.415	-158.775	-158.6	-159.017	-161.399	-163.657	-160.781	-159.948	-159.818	-160.66	-160.952	-159.472				39.2	-161.485	-160.469	-157.636	-160.3	-164.02	-170.467	-170.134	-169.513	-168.447	-172.545	-169.028	-166.741	-160.797	-159.806	-157.637	-155.442				39.2	-158.013	-160.209	-157.474	-159.81	-159.532	-159.062	-158.389	-157.389
	39.3	-159.405	-158.976	-158.141	-160.163	-159.148	-158.694	-158.555	-159.078	-161.036	-163.857	-160.32	-160.349	-159.078	-160.274	-160.785	-159.804				39.3	-160.709	-159.889	-158.018	-160.227	-164.933	-170.971	-169.953	-169.837	-169.44	-173.875	-169.667	-165.995	-161.116	-160.105	-156.614	-155.076				39.3	-157.781	-159.971	-157.338	-160.042	-159.402	-158.6	-158.689	-157.689
	39.4	-159.71	-159.191	-157.54	-160.043	-158.784	-158.554	-158.788	-159.228	-160.935	-163.931	-159.838	-160.531	-158.65	-160.155	-160.84	-159.487				39.4	-160.676	-159.34	-158.838	-160.402	-164.86	-170.65	-169.792	-169.869	-169.445	-174.765	-169.986	-166.058	-161.533	-160.583	-155.35	-155.341				39.4	-157.825	-159.871	-157.373	-160.208	-159.071	-158.675	-159.165	-158.165
	39.5	-159.618	-159.536	-157.58	-159.518	-158.644	-158.404	-159.256	-159.424	-161.124	-163.707	-159.834	-160.357	-159.069	-160.149	-160.994	-158.729				39.5	-161.492	-159.136	-159.462	-160.54	-164.376	-170.596	-169.551	-169.889	-169.036	-174.633	-170.048	-166.502	-161.777	-160.338	-154.694	-156.356				39.5	-158.146	-160.111	-157.538	-160.366	-159.076	-159.396	-159.431	-158.431
	39.6	-159.615	-160.044	-158.072	-159.48	-158.644	-158.31	-159.106	-159.393	-161.455	-163.15	-160.34	-160.396	-159.688	-159.837	-161.172	-158.042				39.6	-162.37	-159.588	-159.428	-160.525	-164.444	-171.057	-169.595	-170.096	-168.636	-173.912	-169.916	-166.408	-161.452	-159.782	-155.037	-157.59				39.6	-158.192	-160.41	-158.029	-160.37	-159.643	-160.046	-159.219	-158.219
	39.7	-159.993	-160.416	-158.461	-159.903	-158.599	-157.882	-158.492	-158.725	-161.618	-162.605	-161.24	-160.987	-159.867	-159.501	-161.359	-158.048				39.7	-163.046	-160.359	-159.174	-160.365	-164.649	-171.331	-170.108	-170.291	-168.04	-173.16	-169.704	-166.196	-160.803	-159.669	-156.052	-157.871				39.7	-157.764	-160.523	-158.713	-160.003	-159.89	-159.858	-159.022	-158.022
	39.8	-160.325	-160.294	-158.586	-159.958	-158.617	-157.081	-158.387	-157.82	-161.718	-162.463	-161.944	-161.433	-159.735	-159.689	-161.675	-158.718				39.8	-163.334	-160.796	-159.558	-160.168	-164.317	-171.23	-170.51	-170.133	-167.37	-172.69	-169.61	-166.858	-160.522	-159.904	-156.893	-156.795				39.8	-157.411	-160.495	-159.038	-159.281	-159.226	-158.814	-159.454	-158.454
	39.9	-160.392	-159.812	-158.605	-159.223	-158.625	-156.513	-158.666	-157.355	-161.923	-162.597	-161.833	-161.231	-159.511	-160.043	-162.178	-159.164				39.9	-162.708	-160.606	-160.471	-159.937	-163.831	-171.043	-170.487	-169.654	-166.855	-172.602	-169.984	-168.196	-160.489	-159.926	-157.031	-155.355				39.9	-157.555	-160.275	-159.035	-158.751	-158.433	-157.969	-160.157	-159.157
	40	-160.337	-159.493	-158.664	-158.412	-158.551	-156.471	-158.36	-157.09	-161.872	-162.664	-161.219	-160.814	-159.248	-160.111	-162.473	-159.143				40	-161.298	-159.994	-160.956	-159.606	-163.76	-170.895	-170.46	-169.373	-166.447	-172.6	-170.82	-168.923	-160.317	-159.56	-156.568	-154.542				40	-158.022	-159.858	-159.363	-158.843	-158.426	-158.225	-160.459	-159.459
	40.1	-160.033	-159.273	-158.91	-158.285	-158.65	-156.636	-157.545	-156.74	-161.291	-162.613	-160.755	-160.598	-158.965	-160.06	-162.066	-159.334				40.1	-160.048	-159.331	-160.779	-159.352	-164.14	-170.88	-170.586	-169.617	-166.239	-172.684	-171.185	-168.157	-160.292	-159.311	-155.966	-154.383				40.1	-158.411	-159.535	-160.041	-159.173	-158.867	-159.061	-160.346	-159.346
	40.2	-159.374	-158.824	-159.451	-158.585	-158.901	-156.693	-157.265	-156.916	-160.688	-162.445	-160.665	-160.474	-158.615	-159.717	-161.177	-159.769				40.2	-159.609	-158.74	-160.648	-159.351	-164.638	-171.021	-170.692	-170.052	-166.592	-172.954	-170.398	-166.553	-160.571	-159.785	-156.018	-154.628				40.2	-158.48	-159.519	-160.421	-159.392	-159.009	-159.555	-160.24	-159.24
	40.3	-158.786	-158.632	-160.132	-159.051	-159.02	-156.728	-157.896	-157.991	-160.635	-162.136	-160.918	-160.267	-158.189	-158.796	-160.586	-159.931				40.3	-159.972	-158.375	-160.799	-159.645	-164.781	-171.153	-170.861	-170.229	-167.2	-173.232	-169.334	-165.685	-160.899	-160.514	-156.725	-155.128				40.3	-158.347	-159.661	-160.21	-159.529	-158.963	-159.692	-160.346	-159.346
	40.4	-158.553	-159.238	-160.568	-159.704	-158.868	-156.71	-158.726	-159.291	-160.927	-161.935	-161.103	-159.982	-158.074	-157.916	-160.702	-160.105				40.4	-160.75	-158.548	-160.664	-160.003	-164.472	-171.406	-171.195	-169.935	-167.158	-173.229	-169.064	-165.857	-161.426	-160.566	-156.916	-155.844				40.4	-158.299	-159.671	-159.597	-159.472	-159.032	-159.542	-160.524	-159.524
	40.5	-158.42	-160.416	-160.34	-160.127	-158.605	-156.544	-158.859	-159.794	-160.975	-162.036	-160.69	-159.757	-158.762	-157.898	-161.163	-160.69				40.5	-161.362	-159.31	-159.947	-160.112	-164.273	-171.984	-171.608	-169.524	-166.368	-172.638	-169.371	-166.211	-161.776	-160.071	-156.111	-157.133				40.5	-158.348	-159.642	-158.704	-159.167	-159.13	-158.782	-160.614	-159.614
	40.6	-157.976	-161.354	-159.517	-159.857	-158.635	-156.608	-158.136	-159.327	-160.558	-162.178	-160.183	-159.758	-160.147	-158.646	-161.433	-160.982				40.6	-161.504	-160.195	-159.048	-160.184	-164.737	-172.394	-171.837	-169.531	-165.838	-171.866	-169.598	-166.637	-161.243	-159.686	-155.485	-158.837				40.6	-158.424	-160.054	-157.626	-158.833	-159.327	-157.839	-160.537	-159.537
	40.7	-157.295	-161.447	-158.802	-159.171	-159.096	-156.995	-157.102	-158.667	-160.073	-162.165	-160.546	-159.956	-161.436	-159.486	-161.365	-160.672				40.7	-161.32	-160.772	-158.753	-160.585	-165.472	-171.968	-171.65	-169.822	-166.331	-172.01	-169.859	-167.47	-160.519	-159.782	-155.97	-159.748				40.7	-158.598	-160.778	-156.842	-158.818	-159.695	-157.685	-160.375	-159.375
	40.8	-157.034	-160.886	-158.478	-158.785	-159.668	-157.274	-156.529	-158.282	-160.025	-162.185	-161.384	-160.01	-161.845	-160.1	-161.112	-160.674				40.8	-161.174	-161.163	-159.373	-161.049	-165.597	-170.966	-171.142	-170.008	-167.443	-173.187	-170.366	-168.296	-160.686	-160.268	-156.899	-159.093				40.8	-158.811	-161.099	-157.01	-159.233	-159.93	-158.289	-160.436	-159.436
	40.9	-157.416	-160.38	-158.216	-158.859	-160.135	-157.305	-156.936	-158.029	-160.233	-162.413	-161.418	-159.736	-161.313	-160.395	-160.855	-161.279				40.9	-161.371	-161.469	-160.157	-160.921	-164.947	-170.244	-170.716	-169.826	-168.327	-174.282	-170.488	-168.313	-161.552	-160.785	-157.249	-157.619				40.9	-158.922	-161.035	-158.05	-159.639	-159.827	-158.811	-160.726	-159.726
	41	-157.881	-160.42	-158.074	-158.978	-160.333	-157.217	-158.056	-157.837	-160.254	-162.872	-160.564	-159.471	-160.567	-160.236	-160.785	-161.487				41	-161.737	-161.569	-160.286	-160.16	-164.084	-170.123	-170.562	-169.037	-168.677	-174.402	-170.022	-167.482	-162.086	-161.125	-157.153	-156.387				41	-158.787	-161.018	-159.053	-159.476	-159.595	-158.953	-160.594	-159.594
	41.1	-158.07	-160.689	-158.505	-159.036	-160.184	-157.102	-159.145	-157.835	-160.284	-163.631	-159.873	-159.638	-160.403	-160.022	-161.018	-160.638				41.1	-161.699	-161.718	-160.051	-159.278	-163.545	-170.359	-170.308	-168.319	-168.772	-173.625	-169.712	-166.565	-161.545	-160.993	-157.209	-155.713				41.1	-158.479	-160.774	-159.444	-159.028	-159.449	-158.938	-159.93	-158.93
	41.2	-158.044	-160.56	-159.485	-159.135	-159.977	-156.963	-159.686	-157.954	-160.746	-164.62	-159.789	-160.338	-160.898	-160.343	-161.186	-159.456				41.2	-161.384	-161.909	-160.149	-158.512	-163.541	-170.711	-169.751	-168.799	-168.912	-172.681	-169.68	-166.118	-160.194	-160.073	-157.313	-155.413				41.2	-158.395	-160.022	-159.567	-159.064	-159.384	-158.882	-159.485	-158.485
	41.3	-157.902	-160.091	-160.484	-159.185	-159.782	-156.846	-159.626	-158.049	-161.465	-165.268	-159.876	-161.27	-161.438	-160.98	-161.001	-159.081				41.3	-161.501	-161.564	-160.391	-157.933	-163.859	-171.075	-169.388	-170.008	-168.991	-172.295	-169.568	-166.114	-159.122	-158.906	-157.249	-154.997				41.3	-158.745	-159.2	-159.756	-159.467	-159.309	-158.869	-159.389	-158.389
	41.4	-157.82	-159.609	-161.126	-159.082	-159.324	-156.913	-159.195	-158.252	-161.98	-165.023	-159.908	-161.784	-161.544	-161.332	-161.023	-159.713				41.4	-162.015	-160.817	-160.219	-157.766	-164.04	-171.209	-169.666	-170.57	-168.553	-172.452	-169.831	-166.117	-159.318	-158.354	-157.243	-154.642				41.4	-159.36	-158.845	-159.678	-159.645	-159.304	-158.762	-159.151	-158.151
	41.5	-157.892	-159.144	-161.396	-158.797	-158.826	-157.034	-158.471	-158.886	-162.266	-164.1	-159.96	-161.322	-161.261	-161.13	-161.564	-160.442				41.5	-162.161	-160.317	-159.718	-158.376	-163.847	-170.742	-170.227	-170.259	-167.442	-172.763	-170.66	-165.611	-160.831	-158.482	-157.34	-155.25				41.5	-159.906	-159.085	-159.227	-159.742	-159.496	-158.469	-158.849	-157.849
	41.6	-158.038	-158.899	-161.408	-158.321	-158.825	-156.879	-157.574	-159.926	-162.523	-163.316	-160.139	-160.254	-160.591	-160.533	-162.117	-160.375				41.6	-161.691	-159.973	-159.474	-159.75	-163.36	-170.157	-170.304	-169.725	-166.345	-173.208	-170.741	-165.034	-162.555	-158.614	-157.092	-156.741				41.6	-160.006	-159.472	-158.902	-160.043	-159.611	-158.383	-158.966	-157.966
	41.7	-158.264	-159.315	-161.319	-157.989	-159.074	-156.571	-157.127	-160.872	-162.638	-163.005	-160.507	-159.661	-159.524	-160.046	-162.456	-159.823				41.7	-161.287	-159.31	-159.755	-160.863	-163.015	-170.428	-169.964	-169.381	-166.007	-173.97	-169.345	-164.971	-163.26	-158.673	-156.264	-157.873				41.7	-159.55	-159.601	-158.973	-160.218	-159.243	-158.725	-159.45	-158.45
	41.8	-158.474	-160.238	-161.154	-158.243	-158.899	-156.494	-157.658	-161.263	-162.359	-162.664	-160.947	-159.841	-158.66	-159.875	-162.779	-159.512				41.8	-161.466	-158.612	-160.132	-160.9	-163.492	-171.276	-169.898	-169.255	-166.138	-174.97	-167.92	-165.012	-162.864	-159.335	-155.453	-158.205				41.8	-158.881	-159.687	-159.188	-160.016	-158.514	-159.128	-159.795	-158.795
	41.9	-158.354	-160.888	-160.603	-158.96	-158.376	-156.568	-158.677	-161.294	-161.649	-161.947	-161.508	-160.147	-158.517	-159.692	-163.008	-159.087				41.9	-161.703	-158.851	-160.084	-160.363	-164.864	-171.555	-170.247	-169.392	-166.493	-175.61	-168.025	-165.047	-162.037	-160.431	-155.412	-158.265				41.9	-158.359	-160.026	-159.161	-159.676	-158.152	-159.159	-160.068	-159.068
	42	-157.883	-160.819	-159.486	-159.631	-158.155	-156.394	-159.246	-161.528	-160.832	-161.105	-162.227	-160.334	-158.705	-159.35	-162.99	-158.217				42	-161.345	-160.212	-159.535	-160.034	-166.169	-171.044	-170.616	-169.76	-167.415	-175.222	-169.293	-165.612	-161.134	-161.27	-156.054	-158.216				42	-158.215	-160.419	-158.919	-159.416	-158.615	-158.814	-160.613	-159.613
	42.1	-157.45	-160.414	-158.445	-159.897	-158.478	-156.079	-159.309	-161.859	-160.443	-160.701	-162.653	-160.667	-158.992	-159.23	-162.773	-157.71				42.1	-160.892	-161.59	-158.764	-160.043	-166.531	-170.566	-170.827	-170.023	-168.549	-173.707	-170.384	-166.476	-160.434	-161.744	-156.656	-157.94				42.1	-158.493	-160.359	-158.889	-159.311	-159.472	-158.572	-160.94	-159.94
	42.2	-157.472	-160.311	-158.25	-159.687	-159.049	-156.2	-159.389	-161.642	-160.56	-160.981	-162.392	-161.082	-159.513	-159.52	-162.288	-158.063				42.2	-161.318	-161.992	-158.32	-160.095	-166.011	-170.636	-171.078	-169.945	-169.015	-171.966	-170.606	-166.842	-160.407	-161.884	-156.601	-157.362				42.2	-158.69	-159.749	-159.311	-159.34	-160.025	-158.708	-160.554	-159.554
	42.3	-158.045	-160.362	-158.649	-159.105	-159.479	-156.864	-159.738	-160.75	-160.574	-161.417	-161.585	-161.373	-160.056	-159.886	-161.483	-158.75				42.3	-162.292	-161.597	-158.779	-160.104	-165.06	-170.913	-171.192	-169.816	-168.831	-171.065	-170.207	-166.623	-161.142	-161.755	-156.127	-156.612				42.3	-158.46	-159.151	-159.826	-159.36	-160.024	-158.713	-160.018	-159.018
	42.4	-158.753	-160.007	-159.094	-158.426	-159.285	-157.36	-160.233	-159.718	-160.364	-161.582	-160.613	-161.53	-160.133	-160.079	-160.567	-159.171				42.4	-162.61	-161.355	-159.881	-160.332	-164.18	-170.995	-170.619	-169.949	-168.555	-171.082	-169.781	-166.559	-162.059	-161.513	-155.954	-156.457				42.4	-158.099	-159.177	-159.913	-159.316	-159.69	-158.057	-160.004	-159.004
	42.5	-158.933	-159.465	-159.524	-158.014	-158.602	-157.005	-160.389	-158.883	-160.655	-161.753	-159.925	-161.375	-159.592	-160.209	-160.019	-159.196				42.5	-162.092	-161.466	-160.559	-160.751	-163.816	-170.846	-169.298	-169.963	-168.117	-171.475	-169.556	-166.998	-162.422	-161.045	-155.988	-157.127				42.5	-157.835	-159.808	-159.49	-159.121	-159.439	-157.219	-160.289	-159.289
	42.6	-158.366	-159.311	-159.779	-158.05	-158.478	-156.374	-159.868	-158.076	-161.595	-162.234	-159.84	-160.758	-159.033	-160.597	-160.351	-158.929				42.6	-161.538	-161.085	-160.257	-160.867	-163.783	-170.529	-168.041	-169.494	-167.529	-172.053	-169.257	-167.312	-162.109	-160.431	-155.704	-157.546				42.6	-157.704	-160.317	-159.045	-158.735	-159.361	-157.048	-160.192	-159.192
	42.7	-157.547	-159.506	-159.485	-158.358	-159.132	-156.512	-159.038	-157.372	-162.373	-162.939	-160.184	-160.226	-158.931	-161.283	-161.349	-158.522				42.7	-161.295	-159.974	-159.329	-160.496	-163.732	-170.281	-167.959	-168.852	-167.142	-173.198	-168.819	-166.747	-161.727	-160.176	-155.32	-156.943				42.7	-157.768	-160.215	-158.888	-158.467	-159.308	-157.507	-159.657	-158.657
	42.8	-157.009	-159.462	-158.687	-158.623	-159.553	-157.243	-158.651	-157.329	-162.397	-163.44	-160.515	-160.236	-159.172	-161.823	-162.081	-158.256				42.8	-161.379	-159.133	-158.471	-160.081	-163.553	-170.537	-169.119	-168.558	-167.029	-174.662	-168.78	-165.447	-161.634	-160.288	-155.233	-155.676				42.8	-158.001	-159.869	-158.738	-158.597	-159.354	-158.011	-159.167	-158.167
	42.9	-156.925	-159.09	-157.861	-158.8	-159.328	-157.703	-158.86	-157.908	-161.956	-163.418	-160.651	-160.322	-159.473	-161.767	-162.037	-158.378				42.9	-161.913	-159.497	-158.117	-159.893	-162.985	-171.071	-170.326	-168.834	-167.188	-175.359	-168.933	-164.551	-161.599	-160.262	-155.33	-154.649				42.9	-158.329	-159.725	-158.561	-159.084	-159.698	-158.375	-158.94	-157.94
	43	-157.189	-159.008	-157.352	-159.119	-159.04	-157.557	-158.956	-158.381	-161.535	-163.044	-160.726	-160.12	-159.464	-161.341	-161.633	-158.874				43	-162.312	-160.768	-158.252	-159.552	-162.32	-171.016	-170.818	-169.42	-167.584	-174.95	-168.43	-164.694	-161.184	-160.194	-155.094	-154.476				43	-158.471	-159.656	-158.686	-159.67	-160.076	-158.74	-159.144	-158.144
	43.1	-157.5	-159.353	-157.279	-159.541	-159.203	-157.109	-158.499	-158.765	-161.194	-162.808	-160.964	-159.855	-159.161	-161.062	-161.392	-159.768				43.1	-162.018	-161.895	-158.776	-158.775	-162.393	-170.293	-170.978	-170.021	-168.06	-174.031	-167.721	-165.404	-160.46	-160.407	-154.555	-155.145				43.1	-158.241	-159.432	-159.053	-159.977	-159.965	-159.031	-159.886	-158.886
	43.2	-157.7	-159.604	-157.658	-159.757	-159.751	-156.844	-157.897	-159.549	-160.885	-162.966	-161.438	-159.569	-158.991	-160.767	-161.391	-160.945				43.2	-161.522	-162.469	-159.641	-157.866	-163.487	-169.778	-171.1	-170.483	-168.506	-172.996	-167.688	-166.286	-160.454	-160.84	-154.747	-156.438				43.2	-157.99	-159.499	-159.374	-159.775	-159.428	-159.036	-160.687	-159.687
	43.3	-157.858	-159.428	-158.335	-159.826	-160.271	-156.85	-157.577	-160.34	-160.822	-163.092	-161.854	-159.086	-159.161	-160.162	-161.454	-161.592				43.3	-161.472	-162.635	-160.502	-157.222	-164.837	-170.025	-170.909	-170.768	-168.887	-172.099	-168.192	-167.186	-161.505	-161.316	-155.959	-158.006				43.3	-157.852	-160.239	-159.583	-159.348	-158.902	-158.783	-160.667	-159.667
	43.4	-158.02	-158.914	-158.962	-159.784	-160.488	-156.897	-157.595	-160.36	-161.101	-162.876	-161.696	-158.621	-159.361	-159.744	-161.399	-161.009				43.4	-161.79	-162.134	-160.776	-157.042	-165.383	-170.68	-170.375	-170.939	-169.135	-171.717	-168.929	-167.629	-162.334	-161.402	-157.233	-159.151				43.4	-157.571	-160.937	-159.631	-159.223	-158.659	-158.534	-159.885	-158.885
	43.5	-158.368	-158.52	-159.374	-159.406	-160.337	-157.111	-157.796	-159.593	-161.394	-162.87	-160.936	-158.479	-159.259	-159.933	-161.302	-159.769				43.5	-162.037	-161.221	-160.382	-157.481	-165.085	-171.028	-169.912	-170.972	-168.834	-171.839	-169.619	-167.519	-162.257	-160.954	-157.891	-159.593				43.5	-157.33	-160.832	-159.338	-159.466	-158.897	-158.582	-159.568	-158.568
	43.6	-158.954	-158.723	-159.582	-159.008	-159.746	-157.653	-158.04	-158.914	-161.589	-163.414	-160.293	-158.612	-159.032	-160.351	-161.413	-158.958				43.6	-162.215	-160.85	-159.837	-158.409	-164.681	-170.754	-169.837	-170.873	-167.583	-172.098	-169.806	-167.393	-161.871	-160.594	-157.756	-159.562				43.6	-157.348	-160.31	-159.055	-159.93	-159.415	-158.824	-160.119	-159.119
	43.7	-159.195	-159.267	-159.467	-159.096	-158.914	-158.138	-158.414	-158.926	-161.907	-164.095	-160.254	-158.924	-158.897	-160.531	-161.582	-158.874				43.7	-162.536	-161.318	-159.545	-159.088	-164.479	-170.287	-170.171	-170.683	-166.05	-172.303	-169.427	-167.191	-161.402	-160.665	-156.928	-158.957				43.7	-157.501	-159.886	-159.33	-160.469	-159.652	-158.769	-160.783	-159.783
	43.8	-158.655	-159.491	-159.053	-159.359	-158.404	-158.03	-159.061	-159.247	-162.11	-164.577	-160.606	-159.413	-158.741	-160.493	-161.418	-159.176				43.8	-162.753	-161.951	-159.588	-159.303	-164.374	-170.236	-170.632	-170.311	-165.5	-172.305	-168.737	-166.59	-160.812	-160.634	-155.947	-157.935				43.8	-157.616	-159.64	-159.772	-160.65	-159.511	-158.33	-161.072	-160.072
	43.9	-157.854	-159.541	-158.772	-159.22	-158.554	-157.191	-159.533	-159.469	-161.808	-164.633	-160.965	-159.916	-158.701	-160.382	-160.962	-159.604				43.9	-162.48	-161.87	-159.799	-159.61	-164.316	-170.703	-170.56	-169.69	-165.914	-172.114	-168.104	-166.196	-160.457	-160.039	-155.355	-157.031				43.9	-157.652	-159.651	-159.869	-160.343	-159.387	-157.973	-160.878	-159.878
	44	-157.603	-159.863	-158.958	-158.585	-159.118	-156.154	-159.28	-159.692	-161.312	-164.107	-161.096	-160.19	-159.08	-160.11	-160.506	-160.104				44	-161.808	-161.015	-159.702	-160.189	-164.379	-171.615	-169.724	-168.962	-166.446	-172.302	-167.891	-166.576	-160.53	-159.47	-155.393	-156.164				44	-157.787	-159.847	-159.834	-159.869	-159.398	-158.051	-160.451	-159.451
	44.1	-157.887	-160.278	-159.336	-157.899	-159.507	-155.634	-158.745	-159.985	-161.122	-163.411	-161.123	-160.261	-159.673	-159.771	-160.365	-160.474				44.1	-161.302	-160.186	-158.958	-160.85	-164.364	-172.723	-168.951	-168.691	-166.864	-173.013	-167.983	-167.354	-160.977	-159.807	-155.95	-155.334				44.1	-158.039	-160.03	-159.774	-159.319	-159.213	-158.388	-160.194	-159.194
	44.2	-158.32	-160.449	-159.419	-157.85	-159.476	-155.725	-158.516	-160.292	-161.275	-163.006	-161.374	-160.233	-160.222	-159.639	-160.69	-160.478				44.2	-161.225	-159.985	-158.007	-161.231	-163.995	-173.31	-169.184	-169.254	-167.164	-173.6	-168.184	-167.582	-161.806	-160.812	-156.412	-155.103				44.2	-158.233	-160.021	-159.586	-158.64	-158.795	-158.646	-160.029	-159.029
	44.3	-158.919	-160.346	-159.256	-158.445	-159.051	-156.192	-158.467	-160.677	-161.527	-162.822	-161.711	-160.039	-160.705	-159.556	-161.202	-160.295				44.3	-161.232	-160.269	-157.495	-160.999	-163.548	-172.823	-170.006	-170.012	-167.113	-173.949	-168.796	-166.572	-162.668	-161.632	-156.232	-155.448				44.3	-158.333	-159.607	-159.423	-158.169	-158.838	-158.741	-159.918	-158.918
	44.4	-159.298	-160.04	-159.03	-159.15	-158.488	-156.839	-158.378	-161.028	-161.39	-162.566	-161.697	-159.7	-160.776	-159.379	-161.619	-160.173				44.4	-161.169	-160.485	-157.397	-160.21	-163.545	-171.635	-170.3	-170.031	-166.553	-174.454	-169.748	-164.703	-162.799	-161.82	-155.74	-155.866				44.4	-158.417	-159.075	-159.323	-158.264	-159.793	-158.728	-160.044	-159.044
	44.5	-158.755	-159.711	-158.667	-159.996	-158.585	-157.392	-158.118	-160.892	-160.492	-162.166	-161.202	-159.512	-160.232	-159.509	-161.996	-160.066				44.5	-161.242	-160.496	-157.603	-159.19	-163.821	-170.714	-169.99	-169.451	-165.949	-174.699	-170.427	-163.295	-161.905	-161.293	-155.708	-156.471				44.5	-158.689	-159.124	-159.146	-158.589	-160.961	-158.739	-160.173	-159.173
	44.6	-157.627	-159.638	-158.207	-160.945	-159.537	-157.623	-157.737	-160.138	-159.239	-161.836	-160.612	-159.552	-159.663	-160.14	-162.275	-159.825				44.6	-161.406	-160.429	-158.454	-158.413	-163.728	-170.625	-169.575	-169.195	-165.935	-174.071	-170.749	-163.298	-160.846	-160.273	-156.215	-157.438				44.6	-159.092	-159.723	-159.032	-158.592	-161.423	-158.893	-160.003	-159.003
	44.7	-156.786	-159.601	-158.062	-161.149	-160.448	-157.453	-157.548	-159.273	-158.517	-161.912	-160.676	-159.634	-159.653	-160.731	-162.055	-159.307				44.7	-161.299	-160.336	-159.721	-158.18	-163.272	-170.979	-169.261	-169.653	-166.342	-173.091	-170.831	-164.204	-160.472	-159.687	-156.583	-158.042				44.7	-159.156	-160.184	-159.167	-158.504	-161.135	-159.078	-159.841	-158.841
	44.8	-156.338	-159.038	-158.636	-160.323	-160.777	-157.135	-157.392	-158.789	-158.817	-162.411	-161.585	-159.796	-159.997	-160.724	-161.276	-158.705				44.8	-161.016	-160.519	-160.347	-158.457	-162.785	-171.09	-169.388	-170.351	-166.435	-172.7	-170.498	-164.881	-160.356	-160.224	-156.678	-157.68				44.8	-158.802	-160.214	-159.457	-158.827	-160.55	-158.903	-159.997	-158.997
	44.9	-156.193	-158.164	-159.604	-159.312	-160.742	-157.131	-156.803	-158.823	-159.581	-162.957	-162.406	-160.175	-160.2	-160.254	-160.567	-158.531				44.9	-160.968	-160.977	-159.897	-158.942	-162.254	-171.015	-170.204	-170.692	-166.037	-172.879	-169.952	-165.207	-159.996	-161.092	-156.99	-156.879				44.9	-158.569	-159.908	-159.727	-159.484	-159.949	-158.339	-160.22	-159.22
	45	-156.706	-157.773	-160.076	-158.759	-160.252	-157.4	-155.957	-159.135	-159.985	-163.255	-162.468	-160.635	-160.153	-160.048	-160.493	-158.809				45	-161.207	-161	-159.05	-159.17	-161.969	-171.309	-171.148	-170.723	-165.896	-173.078	-169.753	-165.802	-159.865	-161.33	-157.237	-156.378				45	-158.735	-159.412	-159.848	-159.959	-159.413	-158.149	-160.256	-159.256
	45.1	-157.57	-158.177	-159.737	-158.566	-159.148	-157.558	-155.647	-159.394	-160.147	-163.356	-162.261	-160.783	-159.913	-160.549	-160.81	-159.02				45.1	-161.567	-160.246	-158.576	-158.906	-162.647	-171.878	-171.629	-170.801	-166.371	-173.001	-169.955	-166.518	-160.303	-161.281	-156.955	-156.334				45.1	-158.859	-159.172	-159.767	-159.891	-159.106	-158.704	-160.358	-159.358
	45.2	-157.711	-159.018	-159.068	-158.56	-158.308	-157.732	-156.272	-159.57	-160.601	-163.442	-161.929	-160.473	-159.698	-161.168	-160.882	-159.002				45.2	-161.744	-159.687	-158.562	-158.323	-164.12	-172.075	-171.507	-170.747	-166.761	-172.655	-170.158	-166.776	-160.77	-161.498	-156.514	-156.629				45.2	-158.602	-159.317	-159.578	-159.245	-159.153	-159.268	-160.709	-159.709
	45.3	-157.078	-159.723	-158.688	-158.835	-158.654	-158.136	-157.406	-159.692	-161.462	-163.474	-161.005	-159.979	-160.007	-161.187	-160.649	-159.017				45.3	-161.502	-160.34	-158.659	-157.871	-165.192	-171.897	-170.792	-170.239	-166.637	-172.502	-170.025	-166.784	-160.812	-161.931	-156.31	-156.852				45.3	-158.214	-159.401	-159.492	-158.492	-159.299	-159.292	-160.837	-159.837
	45.4	-156.709	-159.966	-158.702	-159.291	-159.643	-158.405	-158.383	-159.537	-162.411	-163.384	-159.979	-159.68	-160.668	-160.634	-160.629	-159.113				45.4	-161.204	-161.742	-158.808	-157.751	-165.05	-171.896	-169.954	-169.442	-166.514	-173.057	-169.449	-167.007	-160.808	-162.584	-156.224	-156.743				45.4	-158.113	-159.196	-159.396	-158.441	-159.452	-159.165	-160.472	-159.472
	45.5	-157.248	-159.828	-158.763	-159.384	-160.063	-158.224	-158.839	-158.984	-162.826	-163.198	-159.714	-159.702	-160.812	-159.809	-160.949	-159.153				45.5	-161.196	-162.741	-159.039	-157.764	-164.066	-172.107	-169.748	-168.671	-166.753	-173.942	-168.794	-167.359	-160.979	-163.312	-156.158	-156.852				45.5	-158.323	-158.898	-158.943	-159.186	-159.716	-159.246	-160.344	-159.344
	45.6	-158.171	-159.792	-158.821	-158.924	-159.497	-157.686	-158.823	-158.492	-162.485	-162.733	-160.069	-159.779	-160.31	-159.16	-161.076	-159.406				45.6	-161.142	-162.816	-159.024	-158.06	-163.309	-172.148	-170.208	-168.288	-167.01	-174.451	-168.641	-167.546	-160.624	-163.314	-156.228	-157.482				45.6	-158.642	-159.022	-158.23	-160.044	-159.856	-159.43	-160.867	-159.867
	45.7	-158.475	-160.262	-159.232	-158.624	-158.698	-157.063	-158.579	-158.53	-161.914	-161.904	-160.486	-159.97	-159.665	-159.122	-160.809	-160.295				45.7	-160.94	-162.065	-158.654	-158.754	-163.336	-172.005	-170.732	-168.565	-166.947	-174.545	-168.97	-167.499	-159.678	-162.187	-156.309	-157.979				45.7	-158.905	-159.61	-157.834	-160.515	-159.616	-159.475	-161.22	-160.22
	45.8	-157.839	-160.882	-160.02	-158.953	-158.84	-156.596	-158.252	-158.822	-161.511	-160.976	-160.989	-160.677	-159.16	-159.504	-160.745	-161.43				45.8	-161.189	-160.888	-158.316	-159.16	-163.826	-171.881	-170.942	-169.288	-166.653	-174.537	-169.499	-167.358	-159.218	-160.501	-155.944	-157.601				45.8	-158.96	-160.073	-158.264	-160.417	-159.116	-159.281	-160.991	-159.991
	45.9	-156.955	-161.084	-160.624	-159.335	-159.821	-156.44	-158.108	-158.783	-161.257	-160.364	-161.786	-161.696	-159.148	-159.784	-161.279	-161.93				45.9	-161.881	-160.079	-158.415	-159.024	-164.298	-171.681	-170.953	-169.702	-166.501	-174.55	-169.996	-166.628	-159.617	-159.135	-155.073	-156.484				45.9	-158.863	-160.196	-159.196	-159.857	-158.812	-159.092	-160.95	-159.95
	46	-156.895	-160.828	-160.736	-159.174	-160.322	-156.586	-158.383	-158.553	-161.221	-160.391	-162.384	-162.188	-159.822	-159.896	-161.942	-161.402				46	-162.137	-160.359	-159.025	-158.968	-164.579	-171.203	-170.957	-169.283	-166.693	-174.355	-170.274	-164.854	-160.34	-158.825	-154.694	-155.571				46	-158.909	-160.259	-159.88	-159.352	-159.134	-158.947	-161.455	-160.455
	46.1	-157.857	-160.315	-160.681	-158.669	-159.914	-156.852	-158.848	-158.773	-161.466	-160.944	-162.393	-161.71	-160.539	-159.978	-162.087	-160.239				46.1	-161.755	-161.275	-159.745	-159.278	-164.772	-170.709	-170.925	-168.569	-167.098	-173.85	-170.584	-163.217	-160.859	-159.681	-155.554	-155.669				46.1	-159.139	-160.32	-160.153	-159.211	-159.742	-158.469	-161.749	-160.749
	46.2	-158.952	-159.852	-160.35	-158.121	-159.535	-156.955	-159.198	-159.337	-161.818	-161.831	-162.2	-160.514	-160.676	-159.877	-161.522	-159.31				46.2	-161.599	-161.966	-159.977	-159.459	-165.033	-170.528	-170.716	-168.474	-167.342	-173.266	-171.007	-163.132	-160.691	-160.919	-156.929	-156.507				46.2	-159.374	-160.137	-160.191	-159.184	-159.814	-157.858	-161.108	-160.108
	46.3	-159.32	-159.87	-159.293	-157.523	-159.862	-156.794	-159.541	-159.625	-161.897	-162.996	-162.122	-159.076	-160.432	-159.524	-160.54	-158.918				46.3	-162.04	-162.559	-159.689	-159.081	-165.174	-170.347	-170.252	-169.255	-167.226	-172.645	-171.084	-164.331	-160.058	-161.654	-157.626	-156.929				46.3	-159.407	-159.714	-160.009	-158.99	-159.135	-157.776	-159.683	-158.683
	46.4	-158.908	-160.293	-158.266	-157.042	-160.413	-156.664	-159.793	-159.551	-161.438	-164.244	-162.143	-158.014	-160.151	-159.379	-159.805	-158.762				46.4	-162.419	-163.303	-159.579	-158.665	-164.797	-170.078	-169.657	-170.592	-167.052	-172.323	-170.806	-165.599	-159.828	-161.651	-157.256	-156.244				46.4	-158.96	-159.378	-159.771	-158.666	-158.407	-158.261	-158.354	-157.354
	46.5	-158.19	-160.442	-158.534	-156.958	-160.409	-156.782	-159.455	-159.446	-160.726	-165.08	-162.273	-157.938	-159.848	-159.747	-159.804	-158.952				46.5	-162.334	-163.762	-159.951	-158.994	-164.097	-170.379	-169.437	-171.862	-167.062	-172.82	-170.42	-166.246	-160.372	-161.333	-156.641	-154.906				46.5	-158.209	-159.23	-159.693	-158.558	-158.392	-159.053	-157.867	-156.867
	46.6	-157.657	-160.024	-159.793	-157.344	-159.669	-156.946	-158.467	-159.377	-160.282	-165.032	-162.366	-158.818	-159.404	-160.271	-160.357	-159.434				46.6	-162.101	-163.474	-160.441	-159.723	-163.953	-171.064	-169.856	-172.46	-167.039	-173.758	-169.77	-166.304	-161.386	-161.152	-156.826	-153.774				46.6	-157.877	-159.213	-159.75	-158.843	-158.879	-160.006	-158.249	-157.249
	46.7	-157.823	-159.616	-160.482	-157.94	-158.647	-156.806	-157.519	-159.105	-160.278	-164.167	-162.197	-160.12	-159.002	-160.536	-160.912	-159.544				46.7	-162.156	-162.593	-160.647	-160.077	-164.735	-170.86	-170.62	-172.159	-166.827	-174.158	-169.089	-166.054	-162.281	-161.185	-157.788	-153.452				46.7	-158.217	-159.353	-159.827	-159.324	-158.941	-160.486	-159.169	-158.169
	46.8	-158.636	-159.63	-159.835	-158.286	-157.891	-156.297	-157.161	-158.776	-160.579	-162.936	-161.871	-161.202	-158.945	-160.44	-161.268	-159.136				46.8	-162.347	-162.021	-160.21	-159.958	-165.668	-169.706	-171.331	-171.155	-166.673	-173.624	-169.094	-165.932	-162.741	-161.334	-158.73	-154.346				46.8	-158.64	-159.703	-159.633	-159.703	-158.511	-159.982	-160.139	-159.139
	46.9	-159.204	-159.6	-158.737	-158.236	-157.687	-155.876	-157.378	-158.802	-160.948	-161.825	-161.659	-161.551	-159.197	-160.015	-161.664	-158.943				46.9	-162.252	-162.212	-159.46	-159.42	-165.97	-169.003	-171.357	-170.017	-166.559	-172.565	-169.882	-166.202	-162.674	-161.788	-158.702	-156.171				46.9	-158.645	-160.162	-158.996	-159.549	-158.719	-159.152	-160.747	-159.747
	47	-158.877	-159.177	-158.373	-158.196	-158.064	-156.125	-158.04	-159.052	-161.118	-161.637	-161.664	-161.181	-159.522	-159.571	-161.941	-159.461				47	-162.116	-162.4	-159.446	-158.608	-165.699	-169.174	-170.36	-169.429	-166.342	-171.342	-170.732	-166.688	-161.893	-162.898	-157.23	-157.645				47	-158.505	-160.312	-158.303	-158.811	-159.951	-158.852	-161.037	-160.037
	47.1	-157.833	-158.591	-158.733	-158.707	-158.643	-156.98	-158.733	-159.141	-160.976	-162.741	-161.769	-160.612	-159.792	-159.712	-161.692	-160.059				47.1	-162.26	-162.084	-160.222	-157.986	-165.184	-169.484	-169.05	-169.605	-166.425	-170.184	-170.984	-167.11	-160.712	-164.219	-155.432	-158.061				47.1	-158.776	-159.852	-158.029	-158.256	-160.885	-158.968	-161.157	-160.157
	47.2	-156.643	-158.168	-159.088	-159.481	-159.114	-157.777	-159.001	-159.275	-160.474	-163.892	-161.807	-160.24	-160.015	-160.585	-161.02	-160.046				47.2	-162.432	-161.641	-160.845	-157.826	-164.63	-170.003	-168.221	-170.234	-166.965	-169.802	-170.897	-167.243	-159.899	-164.532	-154.814	-158.071				47.2	-159.38	-159.071	-158.265	-158.422	-160.542	-159.01	-160.998	-159.998
	47.3	-155.798	-157.994	-159.087	-159.474	-159.52	-158.112	-159.127	-160.172	-159.969	-163.824	-161.727	-160.031	-160.191	-161.388	-160.436	-159.864				47.3	-162.662	-161.243	-160.963	-158.063	-164.308	-171.282	-168.049	-170.64	-167.439	-170.369	-171.144	-166.772	-159.669	-163.452	-155.092	-158.007				47.3	-159.741	-158.58	-158.564	-158.863	-159.615	-159.093	-160.599	-159.599
	47.4	-155.329	-157.945	-158.933	-158.541	-159.716	-158.036	-159.415	-161.501	-160.036	-162.95	-161.681	-159.688	-160.265	-161.381	-160.564	-160.018				47.4	-163.114	-160.766	-160.678	-158.574	-164.302	-172.852	-168.293	-170.337	-167.406	-170.966	-171.493	-165.915	-159.901	-161.84	-154.919	-157.472				47.4	-159.597	-158.767	-158.579	-159.041	-159.044	-159.465	-160.412	-159.412
	47.5	-155.174	-158.087	-158.951	-157.718	-159.528	-157.717	-159.484	-161.79	-160.527	-162.281	-161.815	-158.99	-160.296	-160.948	-161.485	-160.228				47.5	-163.617	-160.095	-160.172	-159.26	-164.261	-173.522	-168.411	-169.713	-167.103	-171.355	-171.224	-165.345	-160.446	-160.546	-154.187	-156.668				47.5	-159.154	-159.38	-158.535	-159.145	-158.865	-159.657	-160.438	-159.438
	47.6	-155.637	-158.483	-159.19	-157.394	-159.222	-157.321	-158.993	-160.941	-160.913	-161.94	-162.036	-158.212	-160.333	-160.689	-162.42	-160.182				47.6	-163.998	-159.331	-160.017	-159.841	-164.046	-172.584	-168.184	-169.542	-167.039	-172.056	-170.412	-165.102	-160.709	-159.965	-153.923	-156.356				47.6	-158.739	-159.705	-158.607	-159.341	-158.855	-159.257	-160.209	-159.209
	47.7	-156.613	-158.895	-159.405	-157.324	-159.195	-156.974	-158.082	-160.081	-161.173	-161.642	-162.173	-157.986	-160.205	-160.443	-162.498	-159.994				47.7	-163.855	-159.106	-160.556	-160.082	-163.892	-170.818	-168.143	-170.054	-166.911	-172.667	-169.73	-164.838	-160.452	-160.13	-154.374	-156.83				47.7	-158.604	-159.56	-158.807	-159.386	-159.183	-158.752	-159.88	-158.88
	47.8	-157.334	-159.082	-159.25	-157.659	-159.557	-156.879	-157.207	-159.561	-161.341	-161.462	-162.251	-158.535	-159.868	-160.065	-161.74	-159.862				47.8	-162.977	-159.85	-161.097	-160.036	-163.78	-169.719	-168.814	-171.015	-166.324	-172.588	-169.596	-164.837	-160.292	-160.353	-155.064	-157.366				47.8	-158.636	-159.323	-159.225	-159.188	-159.717	-158.793	-159.935	-158.935
	47.9	-157.421	-158.919	-158.546	-158.278	-159.946	-157.141	-156.803	-159.349	-161.216	-161.398	-162.209	-159.354	-159.482	-159.736	-161.082	-159.92				47.9	-161.955	-161.067	-160.869	-159.902	-163.58	-169.674	-169.782	-171.731	-165.851	-172.131	-169.848	-165.634	-160.378	-160.068	-155.761	-157.188				47.9	-158.652	-159.174	-159.616	-158.883	-159.902	-159.329	-160.189	-159.189
	48	-157.296	-158.638	-157.812	-158.575	-159.781	-157.568	-156.877	-159.484	-161.045	-161.296	-161.785	-159.901	-159.315	-159.666	-160.986	-160.142				48	-161.507	-161.964	-160.177	-160.051	-163.664	-170.028	-170.094	-171.292	-165.975	-172.012	-170.031	-166.768	-160.106	-159.746	-156.311	-156.541				48	-158.724	-158.958	-159.624	-158.607	-159.853	-159.87	-160.28	-159.28
	48.1	-157.392	-158.533	-157.904	-158.329	-159.123	-158.032	-157.179	-159.889	-161.183	-161.472	-161.2	-160.289	-159.428	-160.198	-160.953	-160.322				48.1	-161.577	-162.299	-159.451	-160.602	-164.291	-170.31	-169.679	-169.916	-166.488	-172.546	-169.995	-167.013	-159.567	-160.104	-156.817	-156.044				48.1	-158.846	-158.724	-159.451	-158.518	-160.061	-160.134	-160.504	-159.504
	48.2	-157.808	-158.424	-158.699	-157.88	-158.623	-158.483	-157.531	-160.465	-161.4	-162.161	-160.962	-160.72	-159.497	-160.999	-160.779	-160.463				48.2	-161.594	-162.18	-158.719	-161.032	-165.04	-170.672	-169.428	-168.801	-167.251	-173.226	-169.899	-166.209	-159.714	-161.038	-157.189	-155.749				48.2	-158.996	-158.655	-159.324	-158.774	-160.413	-160.117	-161.012	-160.012
	48.3	-158.455	-158.115	-159.268	-157.606	-158.594	-158.489	-158.03	-160.858	-161.459	-162.659	-161.077	-160.809	-159.481	-161.01	-160.732	-160.863				48.3	-161.758	-161.924	-158.353	-160.827	-165.532	-171.223	-169.905	-168.411	-168.108	-173.221	-169.974	-165.372	-160.629	-161.588	-156.945	-155.65				48.3	-159.234	-158.611	-158.978	-159.13	-160.459	-160.001	-161.254	-160.254
	48.4	-158.844	-157.694	-159.265	-157.528	-158.677	-157.947	-158.623	-160.71	-161.466	-162.395	-161.397	-160.404	-159.53	-160.248	-160.627	-161.31				48.4	-162.421	-161.949	-158.439	-160.131	-165.703	-171.655	-170.984	-168.27	-168.583	-172.721	-170.188	-165.072	-161.163	-161.286	-156.394	-155.966				48.4	-159.708	-158.617	-158.49	-159.194	-160.131	-160.009	-160.819	-159.819
	48.5	-158.835	-157.267	-159.073	-157.596	-158.522	-157.59	-158.974	-159.983	-161.388	-161.927	-161.713	-159.995	-159.592	-159.713	-160.216	-161.163				48.5	-162.839	-162.166	-158.143	-159.456	-165.569	-171.721	-172.176	-168.031	-168.453	-172.736	-170.25	-165.133	-161.038	-160.636	-156.275	-156.586				48.5	-160.418	-159.037	-158.547	-159.062	-159.658	-160.212	-160.158	-159.158
	48.6	-158.997	-157.092	-159.149	-157.972	-158.496	-157.73	-158.805	-158.997	-161.181	-161.997	-161.784	-159.946	-159.396	-159.699	-159.885	-160.671				48.6	-162.413	-162.099	-157.279	-159.016	-165.242	-171.616	-172.616	-167.683	-168.043	-173.367	-170.174	-165.236	-160.86	-159.931	-156.514	-156.927				48.6	-160.869	-159.741	-159.239	-158.967	-159.323	-160.444	-159.821	-158.821
	48.7	-159.297	-157.564	-159.605	-158.644	-158.932	-157.809	-158.22	-158.476	-161.06	-162.661	-161.789	-160.199	-158.858	-159.978	-159.96	-160.51				48.7	-161.699	-161.596	-156.967	-158.408	-165.213	-171.692	-171.787	-167.323	-167.695	-173.698	-170.251	-165.323	-160.51	-159.663	-156.303	-156.628				48.7	-160.49	-160.118	-159.785	-158.784	-159.355	-160.442	-159.73	-158.73
	48.8	-159.106	-158.382	-160.098	-159.137	-159.374	-157.48	-157.726	-158.947	-160.998	-163.357	-161.858	-160.397	-158.575	-160.555	-160.286	-160.562				48.8	-161.495	-161.114	-157.809	-157.57	-165.516	-172.058	-170.666	-167.346	-167.456	-173.523	-170.499	-165.42	-160.045	-160.686	-155.319	-156.012				48.8	-159.452	-160.033	-159.72	-158.39	-159.665	-160.236	-159.756	-158.756
	48.9	-158.498	-158.912	-160.304	-159.017	-159.449	-157.027	-157.503	-159.9	-160.801	-163.493	-161.908	-160.401	-159.201	-161.175	-160.75	-160.454				48.9	-162.174	-161.189	-159.092	-157.358	-165.288	-172.274	-170.532	-167.823	-167.316	-173.627	-170.554	-165.359	-160.004	-162.513	-154.654	-155.688				48.9	-158.466	-159.867	-159.304	-158.131	-159.927	-160.082	-160.046	-159.046
	49	-158.295	-159.24	-160.276	-158.529	-159.249	-156.745	-157.371	-160.308	-160.747	-163.025	-161.982	-160.391	-160.568	-161.424	-161.304	-160.329				49	-163.297	-161.593	-159.838	-158.258	-164.226	-171.657	-170.969	-168.256	-167.063	-174.302	-170.213	-165.156	-160.133	-163.854	-155.24	-155.851				49	-157.997	-159.782	-159.133	-158.151	-159.852	-159.923	-160.504	-159.504
	49.1	-158.68	-159.52	-160.212	-158.235	-158.932	-156.698	-157.429	-160.163	-161.001	-162.224	-162.057	-160.435	-161.696	-161.473	-161.82	-160.373				49.1	-163.902	-161.976	-159.709	-159.731	-163.37	-170.465	-170.783	-168.472	-166.325	-174.836	-169.666	-164.975	-159.555	-164.234	-156.078	-156.264				49.1	-158.082	-159.499	-159.33	-158.075	-159.39	-159.596	-160.641	-159.641
	49.2	-158.822	-159.522	-160.171	-158.427	-158.847	-156.863	-157.792	-160.205	-161.355	-161.371	-162.252	-160.659	-161.798	-161.421	-162.148	-160.296				49.2	-163.686	-162.396	-159.167	-160.995	-163.453	-170.058	-170.091	-168.821	-165.354	-174.589	-169.265	-164.957	-158.301	-163.673	-155.934	-156.508				49.2	-158.377	-158.931	-159.45	-157.923	-158.799	-159.102	-160.329	-159.329
	49.3	-158.25	-159.342	-160.081	-159.165	-159.253	-157.215	-158.226	-160.261	-161.614	-161.049	-162.577	-161.144	-161.128	-160.94	-161.915	-159.923				49.3	-163.193	-162.62	-158.734	-161.52	-163.805	-171.021	-169.757	-169.466	-165.151	-173.759	-169.422	-165.171	-157.558	-162.591	-155.188	-156.49				49.3	-158.557	-158.556	-159.308	-158.214	-158.698	-158.727	-160.088	-159.088
	49.4	-157.697	-159.321	-159.782	-160.065	-159.731	-157.586	-158.359	-159.724	-161.652	-161.616	-162.49	-161.632	-160.303	-160.104	-161.156	-159.645				49.4	-162.866	-162.293	-158.497	-161.113	-163.814	-172.164	-169.871	-169.987	-166.261	-172.803	-170.464	-165.502	-158.223	-161.719	-154.95	-156.582				49.4	-158.565	-158.732	-159.149	-159.126	-159.218	-158.857	-160.276	-159.276
	49.5	-157.944	-159.506	-159.377	-160.334	-159.75	-157.61	-158.097	-159.003	-161.534	-162.46	-161.936	-161.68	-159.584	-159.428	-160.62	-159.683				49.5	-162.404	-161.797	-158.445	-160.214	-164.024	-172.397	-169.879	-170.037	-167.894	-171.916	-172.061	-165.855	-159.656	-161.43	-155.488	-156.864				49.5	-158.407	-159.234	-159.275	-160.161	-159.644	-159.245	-160.478	-159.478
	49.6	-158.611	-159.654	-159.159	-159.599	-159.66	-157.217	-157.874	-158.893	-161.405	-162.828	-161.649	-161.212	-159.106	-159.23	-160.576	-159.88				49.6	-161.567	-161.559	-158.523	-159.588	-164.703	-171.986	-169.647	-169.785	-168.62	-170.985	-173.114	-165.845	-160.244	-161.522	-155.991	-157.011				49.6	-158.187	-159.683	-159.635	-160.654	-159.583	-159.248	-160.143	-159.143
	49.7	-158.677	-159.598	-159.114	-158.453	-160.011	-157.034	-158.161	-159.362	-161.262	-162.7	-162.027	-160.739	-158.919	-159.508	-160.617	-160.107				49.7	-160.861	-161.496	-158.676	-159.482	-165.127	-171.63	-169.346	-169.363	-167.966	-169.897	-172.907	-165.561	-159.706	-161.266	-156.089	-156.784				49.7	-158.092	-160.023	-159.895	-160.417	-159.451	-158.791	-159.423	-158.423
	49.8	-157.737	-159.351	-158.98	-157.75	-160.452	-157.552	-158.813	-159.816	-161.318	-162.449	-162.898	-160.498	-159.061	-159.987	-160.522	-159.912				49.8	-160.748	-161.545	-158.863	-159.52	-164.935	-171.46	-168.869	-168.869	-167.11	-169.235	-171.715	-165.972	-159.482	-160.539	-156.375	-156.508				49.8	-158.238	-160.221	-159.934	-159.737	-159.566	-158.26	-159.06	-158.06
	49.9	-156.462	-159.063	-158.763	-157.651	-160.497	-158.335	-159.109	-159.978	-161.729	-162.251	-163.721	-160.077	-159.407	-160.379	-160.19	-158.989				49.9	-161.171	-161.855	-158.855	-159.615	-164.699	-171.213	-168.35	-168.74	-167.118	-169.953	-170.104	-166.769	-160.072	-160.314	-156.861	-156.781				49.9	-158.472	-160.147	-159.862	-159.054	-159.84	-158.074	-159.47	-158.47
	50	-155.861	-158.977	-158.953	-157.749	-160.202	-158.784	-158.531	-159.951	-162	-161.95	-163.795	-159.335	-159.566	-160.773	-159.869	-157.976				50	-161.559	-162.459	-158.674	-159.93	-164.832	-170.932	-168.075	-169.467	-167.407	-171.941	-168.667	-166.834	-160.508	-161.329	-156.762	-157.594				50	-158.536	-159.955	-159.783	-158.687	-160.149	-158.336	-160.289	-159.289
	50.1	-156.449	-159.104	-159.566	-157.767	-159.581	-158.654	-157.47	-159.945	-161.639	-161.605	-163.017	-158.577	-159.396	-161.42	-160.153	-157.775				50.1	-161.242	-162.74	-158.738	-160.231	-165.032	-170.862	-168.089	-170.722	-167.202	-174.028	-168.066	-166.412	-160.501	-163.038	-155.97	-158.094				50.1	-158.469	-159.793	-159.661	-158.655	-160.248	-158.802	-161.081	-160.081
	50.2	-157.673	-159.199	-159.863	-157.963	-158.827	-157.946	-156.923	-160.101	-160.843	-161.509	-162.023	-158.111	-158.999	-162.059	-160.733	-158.532				50.2	-160.59	-162.105	-159.142	-160.497	-165.029	-171.038	-168.502	-171.335	-166.863	-175.018	-168.482	-166.059	-160.464	-164.282	-155.485	-157.69				50.2	-158.481	-159.512	-159.338	-158.763	-159.88	-159.224	-161.868	-160.868
	50.3	-158.635	-159.108	-159.696	-158.772	-158.385	-157.061	-157.317	-160.377	-160.178	-161.796	-161.579	-158.198	-158.612	-161.915	-160.871	-159.576				50.3	-160.582	-160.955	-159.499	-161.032	-164.852	-171.553	-169.224	-170.723	-166.95	-174.492	-169.14	-165.613	-160.02	-164.563	-156.131	-156.979				50.3	-158.523	-159.08	-158.841	-158.733	-159.279	-159.323	-162.486	-161.486
	50.4	-159.177	-158.808	-159.725	-159.827	-158.101	-156.521	-158.021	-160.749	-160.028	-162.326	-162.113	-158.771	-158.745	-160.969	-160.737	-160.293				50.4	-161.132	-160.034	-159.565	-161.465	-164.779	-172.332	-170.013	-169.695	-167.516	-173.134	-169.3	-165.176	-159.148	-163.767	-157.146	-156.815				50.4	-158.574	-158.764	-158.562	-158.615	-159.006	-159.153	-162.35	-161.35
	50.5	-159.307	-158.54	-160.027	-160.209	-157.704	-156.565	-158.489	-161.161	-160.289	-162.737	-163.056	-159.234	-159.46	-160.137	-160.712	-160.543				50.5	-161.485	-159.759	-159.73	-161.337	-165.009	-172.772	-170.715	-169.232	-168.338	-171.901	-169.278	-165.144	-158.996	-162.274	-157.112	-157.14				50.5	-158.811	-158.809	-158.82	-158.672	-159.105	-159.265	-161.352	-160.352
	50.6	-158.885	-158.93	-160.076	-159.724	-157.612	-157.149	-158.902	-161.329	-160.471	-162.678	-163.3	-159.286	-159.884	-159.778	-160.481	-160.452				50.6	-161.537	-160.316	-160.339	-160.808	-165.238	-172.351	-170.995	-169.496	-168.944	-171.439	-169.633	-165.588	-159.944	-161.167	-156.028	-157.368				50.6	-159.08	-159.212	-159.245	-158.729	-159.079	-159.754	-160.434	-159.434
	50.7	-158.257	-159.9	-159.92	-159.046	-158.194	-157.987	-159.306	-160.968	-160.347	-162.291	-162.561	-159.338	-159.63	-159.667	-159.901	-160.292				50.7	-161.63	-161.397	-160.764	-160.088	-165.016	-171.341	-170.486	-170.023	-169	-171.826	-170.25	-166.276	-161.133	-160.65	-155.185	-157.201				50.7	-159.113	-159.749	-159.118	-158.518	-158.836	-160.146	-160.47	-159.47
	50.8	-158.028	-160.181	-159.927	-158.7	-159.066	-158.535	-159.44	-160.101	-160.262	-162.123	-161.617	-159.739	-159.378	-159.863	-159.508	-160.182				50.8	-162.098	-162.287	-160.274	-159.308	-164.399	-170.496	-169.602	-170.056	-168.788	-172.427	-170.788	-166.852	-161.886	-160.188	-155.303	-156.455				50.8	-158.913	-160.212	-158.546	-158.276	-158.577	-160.239	-161.018	-160.018
	50.9	-158.355	-159.378	-159.975	-158.71	-159.577	-158.494	-159.328	-159.294	-160.664	-162.408	-161.112	-160.296	-159.407	-160.366	-159.6	-160				50.9	-162.997	-162.814	-159.423	-158.906	-163.919	-169.974	-169.243	-169.164	-168.75	-172.65	-171.459	-167.16	-161.842	-159.765	-155.606	-155.108				50.9	-158.415	-160.212	-158.264	-158.287	-158.271	-160.07	-161.073	-160.073
	51	-158.725	-158.654	-159.911	-159.003	-159.529	-158.133	-159.176	-159.221	-161.221	-162.893	-160.887	-160.8	-159.446	-160.92	-159.969	-159.89				51	-163.646	-163.151	-159.225	-159.125	-163.974	-169.495	-169.619	-167.886	-168.912	-172.614	-172.203	-167.153	-161.209	-159.617	-155.368	-153.997				51	-157.712	-159.367	-158.438	-158.602	-157.928	-159.763	-160.447	-159.447
	51.1	-158.603	-158.52	-159.915	-159.363	-159.233	-157.775	-159.178	-159.707	-161.366	-163.079	-160.66	-161.244	-159.552	-161.185	-160.38	-160.226				51.1	-163.341	-163.021	-159.517	-159.365	-164.539	-169.425	-170.011	-167.019	-169.03	-172.781	-172.346	-166.72	-160.829	-159.91	-154.793	-154.205				51.1	-157.345	-158.269	-158.704	-159.184	-157.606	-159.592	-159.718	-158.718
	51.2	-158.308	-158.317	-160.06	-159.442	-159.056	-157.645	-159.281	-160.077	-161.445	-162.674	-160.561	-161.471	-160.017	-161.077	-160.429	-160.662				51.2	-162.457	-162.226	-159.338	-159.012	-165.185	-170.078	-169.705	-166.849	-168.873	-173.158	-171.815	-166.007	-160.85	-160.59	-154.29	-155.241				51.2	-157.635	-158.188	-158.789	-159.661	-157.224	-159.571	-159.409	-158.409
	51.3	-158.356	-157.841	-159.951	-159.221	-158.989	-157.914	-159.174	-160.223	-161.86	-162.09	-160.813	-161.224	-161.036	-160.988	-159.804	-160.503				51.3	-161.933	-161.217	-158.46	-158.387	-165.296	-171.025	-168.929	-167.223	-168.35	-173.544	-171.061	-165.291	-160.84	-161.289	-154.43	-155.385				51.3	-158.326	-159.13	-158.761	-159.683	-157.069	-159.695	-159.485	-158.485
	51.4	-158.409	-157.561	-159.427	-158.995	-158.875	-158.382	-158.953	-160.259	-162.305	-162.045	-161.365	-160.554	-161.899	-161.16	-159.129	-159.839				51.4	-161.94	-160.407	-157.464	-158.113	-164.739	-171.872	-168.435	-167.719	-167.599	-173.947	-169.951	-164.694	-160.72	-161.701	-155.429	-154.505				51.4	-159.039	-159.685	-158.944	-159.406	-157.587	-160.125	-159.761	-158.761
	51.5	-158.058	-157.808	-159.102	-159.013	-158.736	-158.591	-158.786	-160.116	-162.427	-162.509	-161.985	-160.002	-161.511	-161.32	-159.193	-159.25				51.5	-162.032	-159.948	-156.825	-158.393	-164.074	-172.126	-168.486	-168.194	-166.948	-174.276	-168.548	-164.568	-160.523	-161.544	-156.627	-154.069				51.5	-159.652	-159.201	-159.152	-159.178	-158.62	-160.563	-160.333	-159.333
	51.6	-157.714	-158.401	-159.201	-159.196	-158.771	-158.246	-158.435	-159.941	-162.177	-162.669	-162.407	-159.984	-160.347	-161.118	-159.722	-159.017				51.6	-162.008	-159.968	-156.769	-159.036	-164.038	-171.508	-168.863	-169.038	-166.964	-174.296	-167.753	-165.292	-160.26	-160.685	-157.225	-154.542				51.6	-160.056	-158.443	-158.977	-159.262	-159.541	-160.481	-161.069	-160.069
	51.7	-157.869	-158.906	-159.223	-159.296	-159.023	-157.491	-158.215	-159.976	-161.788	-162.275	-162.385	-160.316	-159.813	-160.53	-160.185	-159.127				51.7	-161.729	-160.239	-157.303	-159.655	-164.77	-170.821	-169.356	-170.241	-167.711	-174.138	-167.96	-166.289	-160.034	-159.632	-157.114	-155.332				51.7	-160.032	-158.362	-158.833	-159.65	-160.003	-159.973	-161.389	-160.389
	51.8	-158.157	-159.197	-159.182	-159.248	-159.177	-156.797	-158.549	-160.313	-161.637	-161.925	-161.856	-160.687	-159.905	-159.997	-160.622	-159.403				51.8	-161.442	-160.242	-158.122	-159.959	-165.399	-170.738	-169.876	-171.201	-168.238	-174.01	-168.57	-166.567	-159.858	-159.031	-156.844	-155.876				51.8	-159.789	-159.071	-159.433	-159.871	-160.054	-159.573	-161.013	-160.013
	51.9	-158.126	-159.552	-159.363	-159.176	-158.944	-156.599	-159.1	-160.528	-161.921	-161.815	-161.189	-160.847	-159.567	-159.839	-160.968	-159.551				51.9	-161.845	-159.716	-159.026	-159.98	-165.268	-170.942	-170.287	-171.337	-167.754	-173.717	-168.958	-166.329	-159.823	-159.155	-156.745	-155.852				51.9	-159.65	-160.006	-160.467	-159.55	-159.838	-159.637	-160.332	-159.332
	52	-158.225	-160.059	-159.635	-159.136	-158.507	-156.839	-159.537	-160.269	-162.404	-161.572	-160.98	-160.623	-158.77	-159.868	-161.081	-159.686				52	-162.614	-159.169	-159.783	-159.942	-164.92	-171.29	-170.31	-170.544	-166.698	-173.245	-168.991	-166.489	-160.048	-160.09	-156.715	-155.602				52	-159.423	-160.762	-160.848	-159.164	-159.545	-160	-159.815	-158.815
	52.1	-159.021	-160.255	-159.775	-159.063	-158.438	-157.091	-159.84	-160.165	-162.506	-161.212	-161.312	-160.248	-158.472	-159.98	-161.218	-160.017				52.1	-162.837	-159.311	-159.636	-159.985	-164.771	-172.012	-169.981	-169.33	-166.068	-173.029	-168.87	-167.106	-160.403	-161.407	-156.862	-155.668				52.1	-158.749	-161.169	-160.453	-159.407	-159.475	-160.244	-159.46	-158.46
	52.2	-160.171	-159.754	-159.489	-158.949	-159.013	-157.298	-159.749	-160.603	-161.773	-161.045	-161.644	-159.963	-158.814	-160.346	-161.394	-160.162				52.2	-162.689	-159.818	-158.364	-160.084	-164.52	-172.965	-170.035	-168.59	-166.195	-173.23	-168.603	-167.717	-160.773	-162.193	-157.243	-156.007				52.2	-157.931	-160.989	-160.067	-160.181	-159.709	-160.198	-159.239	-158.239
	52.3	-160.882	-158.927	-158.813	-158.873	-159.791	-157.553	-158.88	-160.743	-160.568	-161.208	-161.696	-159.709	-159.139	-160.953	-161.486	-160.073				52.3	-162.716	-160.019	-157.024	-160.186	-164.172	-173.808	-170.895	-168.853	-166.847	-173.35	-168.219	-168.25	-160.979	-162.01	-157.554	-156.211				52.3	-157.739	-160.242	-159.77	-160.909	-159.902	-159.917	-159.41	-158.41
	52.4	-160.718	-158.418	-158.302	-158.916	-160.221	-157.609	-157.576	-160.13	-159.755	-161.65	-161.747	-159.557	-159.276	-161.411	-161.683	-160.235				52.4	-162.814	-160.158	-156.407	-160.245	-163.924	-174.052	-171.306	-169.66	-167.83	-173.049	-168.347	-168.299	-160.889	-161.271	-157.571	-156.03				52.4	-158.271	-159.47	-159.393	-161.266	-159.682	-159.51	-159.951	-158.951
	52.5	-159.909	-158.551	-158.169	-158.969	-160.239	-157.482	-156.958	-159.454	-159.635	-162.118	-161.982	-159.681	-159.36	-161.2	-162.038	-160.39				52.5	-162.575	-160.279	-156.583	-160.314	-163.813	-173.405	-169.96	-169.993	-168.44	-172.71	-169.249	-167.408	-160.681	-160.701	-157.177	-155.673				52.5	-158.803	-159.234	-159.218	-161.342	-159.113	-159.134	-160.402	-159.402
	52.6	-159.126	-159.176	-158.231	-158.82	-159.76	-157.534	-157.411	-159.404	-159.936	-162.216	-162.298	-160.021	-159.377	-160.318	-162.242	-159.804				52.6	-161.927	-159.94	-157.637	-160.657	-163.843	-172.398	-167.997	-169.426	-168.231	-172.712	-169.963	-166.156	-160.736	-160.686	-156.429	-155.29				52.6	-158.742	-159.627	-159.176	-161.39	-158.59	-159.012	-160.483	-159.483
	52.7	-158.743	-159.765	-158.569	-158.438	-158.833	-157.719	-158.095	-159.756	-160.244	-161.753	-162.683	-160.434	-159.462	-159.505	-162.241	-158.773				52.7	-161.608	-159.506	-159.152	-161.257	-163.813	-171.666	-167.587	-168.821	-167.738	-172.831	-169.719	-165.134	-161.424	-161.261	-155.69	-154.926				52.7	-158.234	-160.215	-158.884	-161.292	-158.53	-159.06	-160.441	-159.441
	52.8	-158.71	-160.102	-159.162	-158.023	-158.17	-157.801	-158.291	-159.835	-160.421	-161.196	-162.893	-160.759	-159.642	-159.356	-162.167	-158.397				52.8	-162.027	-159.673	-160.11	-161.148	-163.562	-171.34	-168.963	-169.269	-167.385	-172.959	-169.095	-164.53	-162.446	-162.078	-155.286	-155.15				52.8	-157.79	-160.349	-158.4	-160.913	-158.991	-159.067	-160.588	-159.588
	52.9	-158.791	-160.108	-159.658	-157.937	-158.287	-158.01	-157.917	-159.418	-160.834	-161.199	-162.345	-160.821	-159.625	-159.723	-161.935	-158.898				52.9	-162.625	-160.729	-160.157	-159.693	-163.53	-171.358	-170.351	-170.611	-167.315	-173.095	-169.027	-164.647	-162.665	-162.528	-155.45	-156.209				52.9	-157.755	-159.952	-157.985	-160.565	-159.518	-159.345	-160.731	-159.731
	53	-158.593	-159.607	-159.896	-158.289	-158.719	-158.49	-157.132	-158.679	-161.825	-161.604	-161.177	-160.607	-159.47	-160.329	-161.638	-159.45				53	-162.912	-162.33	-159.933	-158.048	-164.252	-171.6	-170.511	-171.761	-167.597	-172.95	-169.662	-165.283	-161.772	-162.321	-156.166	-157.358				53	-158.104	-159.483	-157.67	-160.58	-159.71	-159.968	-160.456	-159.456
	53.1	-158.102	-158.894	-160.159	-158.858	-158.864	-158.753	-156.604	-157.978	-163.171	-161.754	-160.291	-160.414	-159.277	-161.028	-161.661	-159.696				53.1	-162.633	-163.362	-159.904	-157.694	-165.295	-171.934	-170.032	-171.859	-167.904	-172.702	-170.347	-165.688	-161.012	-161.704	-156.81	-157.931				53.1	-158.389	-159.078	-157.696	-160.855	-159.647	-160.183	-159.861	-158.861
	53.2	-157.796	-158.504	-160.66	-159.536	-158.826	-158.482	-156.948	-157.876	-163.955	-161.7	-160.36	-160.497	-158.924	-161.482	-161.892	-159.832				53.2	-161.816	-162.962	-159.787	-158.295	-165.725	-172.156	-169.767	-170.928	-167.958	-172.84	-170.392	-165.752	-160.942	-161.153	-156.624	-157.921				53.2	-158.205	-158.697	-158.281	-160.852	-159.527	-159.651	-159.547	-158.547
	53.3	-157.77	-158.452	-160.888	-160.074	-159.053	-158.105	-157.761	-158.482	-163.448	-162.144	-161.473	-160.458	-158.684	-161.399	-161.655	-159.558				53.3	-161.117	-161.438	-159.367	-158.529	-165.283	-171.926	-169.789	-169.643	-167.987	-173.208	-169.825	-165.827	-160.544	-160.801	-155.776	-157.627				53.3	-157.802	-158.615	-158.854	-160.217	-159.459	-159.043	-159.794	-158.794
	53.4	-157.788	-158.39	-160.446	-160.009	-159.591	-158.071	-158.446	-159.115	-162.128	-163.028	-162.744	-160.019	-158.918	-160.813	-160.82	-158.715				53.4	-161.16	-160.158	-159.084	-158.524	-164.309	-171.304	-170.033	-168.635	-168.204	-173.296	-169.214	-165.943	-159.584	-160.546	-155.221	-157.322				53.4	-157.76	-158.885	-158.914	-159.286	-159.554	-159.079	-160.116	-159.116
	53.5	-157.841	-158.353	-159.756	-159.299	-160.125	-158.427	-158.919	-159.045	-161.036	-163.271	-163.086	-159.666	-159.575	-160.06	-160.028	-158.075				53.5	-161.864	-160.092	-158.91	-159.299	-163.579	-170.828	-170.433	-168.103	-168.324	-173.055	-169.365	-166.05	-159.424	-160.348	-155.486	-157.09				53.5	-158.276	-159.197	-158.735	-158.863	-159.702	-159.766	-160.138	-159.138
	53.6	-157.95	-158.628	-159.096	-158.736	-160.328	-158.961	-159.139	-158.396	-160.724	-162.468	-162.714	-159.638	-160.191	-159.736	-159.726	-158.219				53.6	-162.713	-160.694	-158.35	-160.713	-163.763	-170.638	-170.519	-167.912	-168.109	-172.872	-170.482	-166.231	-160.705	-160.116	-156.01	-156.81				53.6	-159.121	-159.364	-158.618	-159.228	-159.795	-160.3	-160.349	-159.349
	53.7	-158.046	-159.23	-158.492	-159.124	-159.885	-159.249	-158.681	-158.018	-161.173	-161.618	-162.286	-159.719	-160.229	-160.129	-159.673	-158.761				53.7	-163.08	-161.04	-157.547	-161.747	-164.348	-170.505	-169.909	-167.839	-167.712	-172.771	-171.413	-166.275	-162.118	-159.615	-156.253	-156.407				53.7	-159.822	-159.48	-158.425	-159.695	-160.02	-160.079	-160.923	-159.923
	53.8	-158.177	-159.887	-158.16	-159.99	-158.964	-158.941	-157.467	-158.332	-161.886	-161.514	-161.97	-159.922	-159.746	-160.824	-159.77	-159.214				53.8	-162.705	-161.16	-157.071	-161.739	-164.232	-170.473	-169.054	-167.66	-167.332	-172.425	-171.045	-165.911	-162.242	-158.804	-156.594	-156.176				53.8	-160.055	-159.658	-158.132	-159.859	-160.338	-159.597	-161.212	-160.212
	53.9	-158.352	-160.032	-158.094	-160.13	-158.366	-158.238	-156.409	-158.694	-162.287	-161.758	-161.97	-160.285	-159.213	-161.233	-160.243	-159.483				53.9	-162.005	-161.375	-157.271	-161.026	-163.34	-170.573	-168.681	-167.61	-166.963	-171.878	-169.802	-165.462	-161.313	-158.357	-157.309	-156.319				53.9	-159.964	-159.6	-158.109	-160.038	-160.312	-159.48	-160.957	-159.957
	54	-158.504	-159.546	-158.298	-159.425	-158.455	-157.648	-156.281	-158.433	-162.288	-161.785	-162.298	-160.641	-158.904	-161.066	-160.88	-159.701				54	-161.483	-161.337	-158.056	-160.515	-162.457	-170.568	-168.804	-168.063	-166.637	-171.413	-168.672	-165.463	-160.372	-158.787	-157.854	-156.328				54	-159.808	-159.053	-158.499	-160.175	-159.884	-159.592	-160.43	-159.43
	54.1	-158.703	-159.057	-159.076	-158.818	-158.867	-157.298	-156.947	-157.815	-162.402	-161.621	-162.541	-160.762	-158.985	-160.523	-161.244	-159.989				54.1	-160.981	-160.914	-159.015	-160.555	-162.132	-170.595	-169.131	-168.519	-166.558	-171.2	-167.943	-165.896	-159.967	-159.557	-157.623	-155.665				54.1	-159.76	-158.465	-158.983	-160.069	-159.65	-159.638	-159.955	-158.955
	54.2	-159.066	-158.976	-160.175	-158.835	-159.003	-156.986	-157.765	-157.632	-162.831	-161.434	-162.444	-160.53	-159.452	-160.182	-161.286	-160.196				54.2	-160.17	-160.671	-159.988	-160.862	-162.232	-170.846	-169.514	-168.454	-166.712	-171.332	-167.572	-166.478	-160.177	-160.081	-156.648	-154.757				54.2	-159.842	-158.25	-159.342	-160.013	-159.965	-159.661	-159.912	-158.912
	54.3	-159.55	-159.13	-160.571	-159.15	-158.746	-156.765	-158.166	-158.105	-163.076	-161.329	-161.901	-160.246	-159.725	-160.446	-161.287	-160.237				54.3	-159.512	-160.959	-160.987	-161.138	-162.462	-171.224	-169.847	-168.247	-166.99	-171.67	-167.738	-166.896	-160.428	-160.301	-155.509	-154.446				54.3	-159.876	-158.423	-159.447	-160.099	-160.268	-159.612	-160.219	-159.219
	54.4	-159.86	-159.199	-159.828	-159.348	-158.706	-156.775	-158.066	-158.681	-162.707	-161.409	-161.158	-160.276	-159.236	-161.161	-161.35	-160.208				54.4	-159.775	-161.534	-161.509	-161.298	-162.803	-172.045	-170.241	-168.386	-167.416	-172.036	-168.271	-166.925	-160.074	-160.332	-154.847	-154.867				54.4	-159.606	-158.98	-159.214	-160	-159.983	-159.16	-160.269	-159.269
	54.5	-159.777	-159.059	-158.742	-159.445	-159.037	-156.931	-157.855	-159.012	-161.863	-161.601	-161.008	-160.564	-158.513	-161.817	-161.337	-160.013				54.5	-160.897	-161.856	-161.226	-161.269	-163.288	-173.223	-170.669	-168.841	-167.698	-172.44	-168.566	-166.82	-159.574	-160.293	-154.736	-155.324				54.5	-158.946	-159.627	-159.098	-159.62	-159.347	-158.526	-159.776	-158.776
	54.6	-159.332	-158.945	-158.225	-159.689	-159.193	-157.098	-158.035	-159.369	-161.178	-161.855	-161.543	-160.83	-158.505	-161.92	-161.352	-159.639				54.6	-161.992	-161.89	-160.626	-160.951	-163.922	-173.671	-170.621	-169.278	-167.451	-173.177	-168.449	-166.691	-159.884	-160.345	-154.953	-155.205				54.6	-158.152	-160.02	-159.472	-159.338	-158.727	-158.437	-159.307	-158.307
	54.7	-158.738	-159.166	-158.541	-159.892	-158.874	-157.228	-158.578	-159.947	-161.07	-162.227	-161.9	-160.893	-159.247	-161.315	-161.562	-159.441				54.7	-162.341	-161.881	-160.101	-160.444	-164.739	-172.914	-170.102	-169.565	-166.988	-174.468	-168.247	-166.154	-160.758	-160.738	-155.596	-154.915				54.7	-157.6	-160.202	-159.739	-159.446	-158.315	-158.986	-159.416	-158.416
	54.8	-158.418	-159.65	-159.521	-159.883	-158.08	-157.329	-158.853	-160.315	-161.289	-162.452	-161.643	-160.896	-160.046	-160.462	-161.85	-159.595				54.8	-162.165	-161.658	-159.373	-159.892	-165.61	-171.913	-169.804	-169.86	-166.807	-175.804	-168.367	-165.366	-161.114	-161.38	-156.542	-155.223				54.8	-157.427	-160.161	-159.284	-159.603	-158.373	-159.556	-159.713	-158.713
	54.9	-158.591	-159.935	-160.49	-160.114	-157.198	-157.51	-158.584	-159.987	-161.469	-162.211	-161.132	-161.118	-160.384	-160.032	-162.004	-159.69				54.9	-162.149	-161.09	-158.435	-159.394	-166.031	-171.549	-169.842	-170.279	-166.954	-176.441	-168.905	-165.288	-160.568	-161.561	-157.164	-155.868				54.9	-157.596	-159.94	-158.378	-159.579	-158.988	-159.81	-159.876	-158.876
	55	-159.008	-159.775	-160.535	-160.512	-157.037	-157.666	-158.145	-159.296	-161.277	-161.764	-160.806	-161.753	-160.263	-160.138	-162.103	-159.326				55	-162.465	-160.464	-157.971	-159.328	-165.729	-171.537	-169.79	-170.55	-167.185	-176.201	-169.321	-166.39	-159.745	-160.955	-157.293	-156.123				55	-157.985	-159.831	-157.746	-159.683	-159.677	-159.834	-160.056	-159.056
	55.1	-159.126	-159.433	-159.444	-160.482	-157.793	-157.487	-157.93	-158.82	-160.532	-161.552	-160.784	-162.639	-160.097	-160.315	-162.26	-158.796				55.1	-162.694	-160.11	-158.212	-159.846	-165.121	-171.421	-169.707	-170.386	-167.233	-175.249	-169.445	-167.847	-159.653	-160.21	-157.509	-155.97				55.1	-158.339	-159.899	-157.954	-159.918	-159.763	-159.87	-160.177	-159.177
	55.2	-158.69	-159.169	-157.984	-159.945	-158.705	-157.105	-158.05	-158.819	-159.781	-161.761	-160.785	-162.979	-160.215	-160.196	-162.332	-158.529				55.2	-162.607	-160.105	-158.769	-160.518	-164.752	-171.376	-169.955	-169.856	-167.096	-174.044	-170.004	-168.358	-160.845	-160.107	-158.192	-155.615				55.2	-158.536	-159.866	-158.732	-159.973	-159.51	-160.05	-160.131	-159.131
	55.3	-158.184	-158.924	-157.048	-159.145	-159.097	-156.944	-158.294	-159.347	-159.822	-162.361	-160.524	-161.933	-160.679	-159.784	-162.311	-158.487				55.3	-162.744	-160.322	-159.499	-161.091	-164.846	-171.657	-170.36	-169.022	-166.799	-173.277	-171.02	-167.658	-162.682	-160.498	-159.09	-155.151				55.3	-158.555	-159.511	-159.071	-159.747	-159.728	-160.173	-160.187	-159.187
	55.4	-158.075	-158.599	-156.865	-158.545	-159.208	-156.889	-158.391	-160.069	-160.591	-163.01	-160.21	-159.912	-161.256	-159.404	-162.232	-158.543				55.4	-163.622	-160.601	-160.209	-161.615	-165.062	-172.098	-170.466	-168.164	-166.346	-173.169	-171.36	-166.667	-163.721	-160.616	-159.694	-155.087				55.4	-158.39	-159.091	-158.671	-159.3	-160.149	-160.007	-160.647	-159.647
	55.5	-158.174	-158.174	-157.361	-158.516	-159.487	-156.792	-158.289	-160.405	-161.501	-163.343	-160.174	-158.332	-161.524	-159.451	-161.846	-158.683				55.5	-164.52	-160.85	-160.324	-162.137	-165.053	-172.457	-170.295	-167.828	-166.125	-173.292	-170.512	-166.359	-163.254	-160.446	-159.545	-156.109				55.5	-158.115	-159.148	-158.491	-158.909	-159.987	-159.636	-161.202	-160.202
	55.6	-158.266	-157.805	-158.566	-158.849	-159.796	-157.086	-158.199	-160.095	-162.135	-163.245	-160.306	-157.999	-161.329	-159.972	-161.169	-158.991				55.6	-164.344	-161.006	-159.334	-162.775	-165.126	-172.614	-170.036	-167.871	-166.647	-173.216	-169.198	-166.956	-161.994	-160.476	-158.671	-157.651				55.6	-157.92	-159.638	-159.008	-158.911	-159.433	-159.288	-161.144	-160.144
	55.7	-158.505	-157.68	-159.835	-159.265	-159.947	-157.895	-158.305	-159.311	-162.218	-162.828	-160.309	-158.522	-160.724	-160.745	-160.602	-159.585				55.7	-163.36	-161.127	-157.653	-163.24	-165.53	-172.45	-169.406	-167.784	-167.707	-172.887	-168.334	-167.802	-161.014	-160.552	-157.608	-158.322				55.7	-158.085	-159.802	-159.674	-159.232	-158.971	-158.94	-160.426	-159.426
	55.8	-158.806	-157.692	-160.141	-159.694	-159.847	-158.594	-158.419	-158.507	-161.806	-162.553	-160.3	-159.22	-159.617	-161.441	-160.447	-160.128				55.8	-162.429	-161.288	-156.815	-163.165	-165.872	-171.905	-168.216	-167.821	-168.618	-172.463	-168.274	-168.147	-160.58	-160.525	-156.85	-157.853				55.8	-158.639	-159.447	-160.188	-159.463	-158.339	-158.511	-159.847	-158.847
	55.9	-158.917	-157.684	-159.566	-159.938	-159.335	-158.542	-158.41	-158.369	-161.289	-162.861	-160.662	-159.775	-158.411	-161.755	-160.838	-160.139				55.9	-162.034	-161.306	-157.691	-162.981	-165.729	-171.465	-167.18	-168.503	-169.104	-172.257	-168.594	-167.978	-160.288	-160.803	-156.586	-157.017				55.9	-159.021	-159.353	-160.409	-159.371	-157.561	-158.274	-159.894	-158.894
	56	-158.914	-157.713	-159.059	-159.947	-158.528	-157.932	-158.442	-158.861	-160.961	-163.331	-161.351	-160.203	-158.066	-161.723	-161.624	-159.855				56	-162.481	-160.935	-159.048	-163.124	-165.324	-171.638	-167.233	-169.808	-169.165	-172.421	-168.984	-167.249	-159.954	-161.316	-156.759	-156.393				56	-158.874	-159.977	-160.126	-159.156	-157.422	-158.475	-160.334	-159.334
	56.1	-158.858	-157.94	-158.881	-159.993	-158.024	-157.562	-158.431	-159.144	-161.073	-163.023	-161.918	-160.704	-158.609	-161.583	-162.253	-159.764				56.1	-163.285	-160.329	-159.187	-163.223	-165.169	-172.051	-168.38	-170.942	-168.649	-173.018	-169.633	-165.914	-159.96	-161.632	-157.085	-155.851				56.1	-158.564	-160.757	-159.532	-159.001	-158.021	-158.974	-160.681	-159.681
	56.2	-158.846	-158.653	-158.658	-160.033	-158.289	-157.593	-158.096	-159.002	-161.673	-161.89	-161.947	-161.26	-159.021	-161.35	-162.449	-159.708				56.2	-163.253	-159.901	-158.089	-162.939	-165.351	-172.127	-169.874	-170.976	-167.627	-174.004	-170.24	-164.921	-160.49	-161.735	-157.08	-155.259				56.2	-158.46	-161.012	-159.124	-158.731	-158.698	-159.464	-160.789	-159.789
	56.3	-158.976	-159.739	-158.385	-159.747	-158.975	-157.481	-157.517	-158.845	-162.277	-160.872	-161.358	-161.53	-159.054	-161.086	-162.446	-159.445				56.3	-162.057	-159.867	-157.012	-162.497	-165.157	-171.898	-171.081	-170.374	-166.707	-174.663	-170.254	-165.154	-160.895	-161.55	-156.829	-155.029				56.3	-158.596	-160.853	-159.273	-158.41	-159.216	-159.857	-161.009	-160.009
	56.4	-158.897	-160.306	-158.359	-159.142	-159.333	-157.032	-157.051	-158.955	-162.503	-160.563	-160.47	-161.497	-159.547	-160.918	-162.203	-159.274				56.4	-160.736	-159.994	-156.922	-161.819	-164.162	-171.7	-171.853	-170.196	-166.491	-174.505	-170.009	-165.898	-160.449	-160.987	-157.126	-155.465				56.4	-158.742	-160.662	-159.642	-158.446	-159.576	-160.14	-161.437	-160.437
	56.5	-158.35	-159.827	-158.78	-158.531	-159.154	-156.511	-156.951	-159.38	-162.441	-160.766	-159.842	-161.509	-160.615	-160.746	-161.593	-159.351				56.5	-160.47	-159.773	-157.94	-160.523	-163.192	-171.72	-172.039	-170.222	-166.83	-174.204	-170.241	-166.41	-159.297	-160.436	-157.988	-156.222				56.5	-158.762	-160.398	-159.621	-158.971	-159.641	-160.072	-161.673	-160.673
	56.6	-157.851	-158.883	-159.471	-158.341	-158.787	-156.183	-157.354	-159.779	-161.999	-161.229	-159.987	-161.501	-161.269	-160.577	-161.052	-159.541				56.6	-161.177	-159.14	-159.31	-159.191	-163.045	-171.827	-171.623	-169.715	-167.156	-174.361	-170.871	-166.918	-158.43	-160.331	-158.415	-156.802				56.6	-158.786	-160.047	-159.214	-159.764	-159.59	-159.601	-161.539	-160.539
	56.7	-157.997	-158.317	-159.963	-158.675	-158.519	-156.302	-158.18	-159.689	-161.137	-161.819	-160.852	-161.188	-160.888	-160.72	-160.915	-159.725				56.7	-161.864	-158.782	-159.962	-158.844	-163.425	-171.781	-171.024	-168.83	-167.241	-174.615	-171.139	-167.193	-158.521	-160.59	-157.699	-157.153				56.7	-158.908	-159.979	-158.894	-160.351	-159.706	-158.973	-161.232	-160.232
	56.8	-158.581	-158.444	-159.955	-159.08	-158.338	-156.88	-158.945	-158.978	-160.404	-162.161	-161.694	-160.93	-159.982	-161.193	-160.89	-159.592				56.8	-162.097	-159.125	-159.535	-159.405	-163.922	-171.534	-170.498	-168.439	-167.179	-174.419	-170.753	-166.696	-159.093	-160.929	-156.248	-157.347				56.8	-158.958	-160.3	-158.965	-160.331	-159.713	-158.432	-160.847	-159.847
	56.9	-158.902	-158.984	-159.477	-159.168	-158.268	-157.53	-159.004	-157.969	-160.028	-162.069	-161.884	-161.188	-159.44	-161.617	-160.716	-159.091				56.9	-161.963	-160.06	-158.871	-160.06	-164.518	-171.134	-169.996	-168.865	-167.348	-173.729	-170.173	-165.876	-159.621	-161.534	-155.257	-157.374				56.9	-158.621	-160.627	-159.215	-159.825	-159.437	-158.231	-160.457	-159.457
	57	-158.579	-159.491	-158.817	-159.019	-158.496	-157.758	-158.358	-157.268	-159.707	-162.082	-161.38	-161.63	-159.474	-161.653	-160.514	-158.673				57	-161.598	-161.074	-159.046	-160.285	-165.031	-170.89	-169.494	-169.366	-168.143	-172.955	-169.962	-165.668	-160.205	-162.385	-155.436	-157.43				57	-157.814	-160.787	-159.209	-159.189	-159.269	-158.439	-160.109	-159.109
	57.1	-157.979	-159.872	-158.379	-158.926	-158.831	-157.364	-157.759	-157.358	-159.629	-162.436	-160.518	-161.641	-159.611	-161.081	-160.648	-158.421				57.1	-161.522	-161.554	-159.885	-159.997	-165.089	-171.232	-168.97	-169.186	-168.764	-172.655	-170.269	-166.349	-160.792	-162.425	-156.341	-157.426				57.1	-157.25	-160.885	-158.919	-158.566	-159.422	-158.7	-159.831	-158.831
	57.2	-157.799	-160.22	-158.369	-159.178	-158.905	-156.781	-157.642	-158.022	-160.254	-162.267	-159.822	-161.328	-159.575	-159.938	-161.25	-158.207				57.2	-161.959	-161.487	-160.341	-159.663	-164.691	-172.007	-168.578	-168.477	-168.157	-173.036	-170.674	-167.596	-160.893	-161.145	-157.315	-157.003				57.2	-157.449	-160.854	-158.612	-158.134	-159.656	-158.838	-159.81	-158.81
	57.3	-158.304	-160.502	-158.409	-159.809	-158.74	-156.778	-157.931	-158.757	-161.213	-161.201	-159.589	-161.247	-159.751	-158.716	-162.048	-158.198				57.3	-162.479	-161.294	-160.167	-159.798	-164.273	-172.639	-168.889	-167.875	-167.002	-173.639	-170.551	-168.573	-160.413	-159.661	-157.908	-156.455				57.3	-157.704	-160.421	-158.446	-158.192	-159.867	-159.091	-160.088	-159.088
	57.4	-159.032	-160.452	-157.977	-160.223	-158.639	-157.438	-158.572	-159.438	-161.484	-160.27	-159.799	-161.393	-160.264	-158.129	-162.538	-158.377				57.4	-163.016	-160.994	-159.848	-160.352	-164.078	-172.799	-170.015	-167.929	-166.584	-173.787	-169.848	-168.508	-160.033	-158.991	-157.658	-156.332				57.4	-157.555	-159.634	-158.385	-158.617	-160.216	-159.3	-160.348	-159.348
	57.5	-159.406	-159.739	-157.316	-159.622	-158.923	-158.179	-159.266	-159.879	-160.862	-160.209	-160.501	-161.342	-160.55	-158.474	-162.371	-158.687				57.5	-163.618	-160.328	-159.417	-160.994	-163.968	-172.631	-171.158	-168.773	-166.903	-173.149	-169.187	-167.628	-160.249	-159.043	-156.679	-156.429				57.5	-157.329	-158.985	-158.395	-159.098	-160.579	-159.176	-160.318	-159.318
	57.6	-159.412	-158.551	-157.106	-158.353	-159.577	-158.669	-159.476	-159.945	-160.277	-160.742	-161.513	-160.98	-160.56	-159.338	-161.755	-159.176				57.6	-164.005	-159.493	-158.758	-161.538	-163.845	-172.431	-171.432	-169.725	-167.288	-172.038	-168.953	-166.394	-161.179	-159.565	-155.617	-156.135				57.6	-157.237	-158.842	-158.643	-159.625	-160.652	-158.964	-160.15	-159.15
	57.7	-159.183	-157.535	-157.598	-157.659	-159.975	-158.891	-159.175	-159.859	-160.294	-161.615	-162.167	-160.49	-160.797	-160.251	-161.09	-159.575				57.7	-164.068	-159.055	-157.942	-161.757	-163.798	-172.222	-170.615	-169.912	-167.556	-171.464	-168.885	-165.073	-162.449	-160.283	-154.877	-155.769				57.7	-157.335	-159.161	-159.108	-160.071	-160.469	-158.701	-160.15	-159.15
	57.8	-158.858	-157.151	-158.081	-158.027	-159.594	-158.688	-158.771	-159.726	-160.608	-162.598	-162.178	-160.116	-161.066	-160.95	-160.485	-159.683				57.8	-163.816	-159.418	-157.185	-161.588	-163.8	-171.979	-169.42	-169.267	-167.827	-171.893	-168.779	-164.318	-163.047	-160.596	-154.473	-156.132				57.8	-157.847	-159.787	-159.254	-160.048	-160.148	-158.324	-160.375	-159.375
	57.9	-158.84	-157.361	-158.033	-158.865	-159.208	-157.965	-158.413	-159.146	-160.906	-163.03	-161.846	-159.918	-160.788	-161.221	-159.968	-159.861				57.9	-163.24	-160.572	-157.1	-161.53	-163.753	-171.756	-168.773	-168.496	-168.269	-172.463	-168.745	-164.431	-162.706	-160.492	-154.56	-156.762				57.9	-158.834	-160.487	-158.812	-159.602	-159.657	-158.215	-160.863	-159.863
	58	-159.261	-157.843	-158.131	-159.478	-159.847	-157.159	-157.907	-157.972	-160.942	-162.634	-161.455	-159.759	-160.094	-161.257	-159.659	-160.399				58	-162.489	-161.832	-157.946	-161.821	-163.75	-171.492	-168.892	-168.526	-168.839	-172.622	-168.803	-164.86	-162.351	-160.48	-155.138	-156.754				58	-159.682	-160.931	-158.423	-159.197	-159.346	-158.365	-161.436	-160.436
	58.1	-159.719	-158.21	-158.918	-159.61	-160.849	-156.704	-157.292	-157.342	-160.667	-162.024	-161.314	-159.454	-159.535	-161.273	-159.749	-160.854				58.1	-161.756	-162.636	-158.934	-161.83	-163.902	-171.178	-169.455	-169.542	-169.073	-172.713	-169.002	-165.224	-162.55	-160.455	-155.491	-156.374				58.1	-159.723	-161.02	-158.678	-159.14	-159.664	-158.324	-161.486	-160.486
	58.2	-160.079	-158.236	-159.752	-159.585	-160.77	-156.684	-157.071	-157.907	-160.703	-161.822	-161.512	-159.079	-159.528	-160.94	-160.321	-160.544				58.2	-160.985	-163.308	-159.341	-161.194	-164.19	-170.932	-169.973	-170.639	-168.543	-172.827	-169.559	-165.876	-162.781	-160.098	-155.126	-156.142				58.2	-159.138	-160.705	-159.323	-159.388	-160.268	-158.025	-160.97	-159.97
	58.3	-160.45	-158.33	-159.992	-159.909	-159.544	-157.079	-157.504	-158.722	-161.356	-162.025	-161.485	-158.884	-159.994	-160.26	-161.012	-159.474				58.3	-160.421	-163.984	-159.292	-160.609	-164.466	-170.827	-170.138	-171.076	-167.481	-172.857	-170.388	-166.869	-162.347	-159.509	-154.564	-156.185				58.3	-158.57	-160.112	-159.842	-159.704	-160.621	-157.831	-160.702	-159.702
	58.4	-160.485	-158.988	-159.815	-160.553	-158.493	-157.502	-158.092	-159.226	-161.981	-162.42	-160.905	-158.941	-160.374	-159.705	-161.438	-158.434				58.4	-160.559	-164.251	-159.082	-160.487	-164.447	-170.855	-170.125	-170.83	-166.749	-173.065	-170.841	-167.601	-161.638	-158.946	-154.455	-156.49				58.4	-158.377	-159.802	-159.826	-159.705	-160.657	-158.065	-160.906	-159.906
	58.5	-160.046	-159.793	-159.476	-161.072	-158.288	-157.492	-158.207	-159.378	-161.969	-162.864	-160.296	-159.211	-160.437	-159.427	-161.612	-158.156				58.5	-161.346	-163.782	-158.83	-160.292	-164.22	-170.942	-170.174	-170.231	-166.743	-173.525	-170.506	-167.743	-161.737	-158.953	-154.816	-156.875				58.5	-158.452	-159.947	-159.141	-159.261	-160.418	-158.601	-160.977	-159.977
	58.6	-159.742	-160.081	-159.171	-161.199	-158.381	-157.14	-157.9	-159.013	-161.526	-163.197	-160.04	-159.696	-160.521	-159.448	-161.501	-158.825				58.6	-162.395	-162.753	-158.842	-159.618	-164.446	-171.05	-170.338	-169.717	-167.007	-173.917	-169.755	-167.638	-162.549	-159.814	-155.345	-157.263				58.6	-158.473	-160.103	-158.463	-158.692	-159.969	-159.19	-160.774	-159.774
	58.7	-159.92	-159.867	-159.173	-160.95	-158.354	-156.844	-157.619	-158.506	-161.137	-163.289	-160.098	-160.316	-160.721	-159.722	-161.047	-160.004				58.7	-163.168	-161.721	-159.186	-158.808	-165.21	-171.123	-170.579	-169.459	-167.222	-174.016	-169.106	-167.696	-162.913	-160.981	-155.577	-157.68				58.7	-158.414	-159.863	-158.691	-158.341	-159.447	-159.724	-160.607	-159.607
	58.8	-159.989	-159.563	-159.143	-160.377	-158.131	-157.02	-157.613	-158.403	-160.903	-163.192	-160.544	-160.741	-160.453	-159.728	-160.692	-161.064				58.8	-163.352	-161.051	-159.498	-158.589	-165.638	-171.035	-170.506	-169.561	-167.28	-173.805	-168.758	-167.749	-162.57	-161.757	-155.399	-158.076				58.8	-158.579	-159.135	-159.542	-158.471	-159.046	-159.955	-160.456	-159.456
	58.9	-159.47	-159.372	-158.752	-159.695	-157.963	-157.892	-157.937	-158.524	-160.962	-163.328	-161.194	-160.767	-159.461	-159.18	-160.971	-161.525				58.9	-163.091	-160.83	-159.584	-159.126	-165.206	-170.908	-169.891	-169.985	-167.074	-173.505	-168.585	-167.477	-162.109	-161.934	-155.394	-158.04				58.9	-158.875	-158.35	-159.994	-159.016	-159.041	-159.708	-160.27	-159.27
	59	-158.779	-159.26	-158.599	-159.315	-158.323	-158.939	-158.384	-158.561	-161.584	-163.985	-161.553	-160.609	-158.603	-158.618	-161.645	-161.108				59	-162.52	-160.952	-159.281	-159.636	-164.28	-170.972	-169.427	-170.212	-166.729	-173.319	-168.347	-166.839	-161.853	-161.955	-155.872	-157.359				59	-158.697	-158.062	-159.889	-159.576	-159.492	-159.385	-160.295	-159.295
	59.1	-158.611	-159.426	-159.133	-159.339	-158.819	-159.179	-158.545	-158.807	-162.339	-164.678	-161.493	-160.489	-158.638	-158.607	-161.953	-160.312				59.1	-161.849	-161.352	-158.539	-159.731	-163.587	-171.094	-169.815	-170.052	-166.561	-173.394	-168.151	-166.087	-161.515	-162.345	-156.224	-156.506				59.1	-157.898	-158.142	-159.891	-159.997	-159.949	-159.279	-160.489	-159.489
	59.2	-158.859	-160.06	-159.88	-159.546	-158.845	-158.553	-158.359	-159.392	-162.456	-164.85	-161.264	-160.308	-159.205	-158.969	-161.727	-160.17				59.2	-161.505	-162.138	-158.062	-160.059	-163.51	-171.258	-170.627	-169.729	-166.784	-173.814	-168.443	-165.7	-160.538	-162.803	-156.159	-155.585				59.2	-157.1	-158.336	-160.094	-160.179	-159.855	-159.169	-160.432	-159.432
	59.3	-158.877	-160.686	-160.169	-159.694	-158.718	-157.914	-158.181	-159.873	-161.906	-164.543	-161.101	-159.821	-159.822	-159.454	-161.362	-160.727				59.3	-161.718	-163.101	-158.42	-160.924	-163.789	-171.537	-171.068	-169.198	-167.424	-174.134	-169.058	-165.867	-158.956	-162.898	-156.18	-154.678				59.3	-156.783	-158.689	-160	-159.832	-159.499	-159.174	-160.152	-159.152
	59.4	-158.533	-160.823	-159.69	-159.801	-158.748	-157.497	-158.21	-160.124	-161.322	-164.032	-161.301	-159.156	-160.558	-159.95	-161.243	-160.999				59.4	-162.206	-163.563	-158.906	-161.622	-164.108	-171.598	-171.013	-168.47	-168.399	-174.015	-169.277	-166.205	-157.456	-162.702	-156.085	-154.464				59.4	-157	-159.018	-159.598	-159.307	-159.776	-159.469	-160.141	-159.141
	59.5	-158.126	-160.648	-158.839	-159.914	-158.629	-157.067	-158.473	-160.379	-161.21	-163.632	-161.83	-158.895	-161.162	-160.121	-161.502	-160.68				59.5	-162.608	-163.031	-158.715	-161.425	-164.151	-171.22	-170.824	-167.848	-169.391	-173.88	-169.104	-166.066	-156.83	-162.382	-155.248	-155.081				59.5	-157.671	-159.131	-159.302	-159.343	-160.512	-159.584	-160.462	-159.462
	59.6	-157.758	-160.526	-158.465	-159.928	-158.403	-156.89	-158.991	-160.53	-161.496	-163.429	-162.056	-159.238	-161.215	-160.152	-161.841	-160.266				59.6	-162.939	-161.819	-158.2	-160.816	-163.852	-170.558	-170.79	-167.628	-170.065	-173.798	-168.887	-165.507	-157.412	-162.131	-154.083	-155.708				59.6	-158.248	-159.143	-159.324	-159.757	-160.894	-159.397	-160.709	-159.709
	59.7	-157.35	-160.557	-158.721	-159.829	-158.563	-157.372	-159.412	-160.384	-161.784	-163.13	-161.58	-159.853	-160.951	-160.61	-161.847	-159.959				59.7	-163.012	-160.756	-157.921	-160.694	-163.807	-170.125	-170.718	-167.945	-170.295	-173.376	-168.65	-165.44	-159.002	-162.15	-153.462	-155.927				59.7	-158.112	-159.115	-159.649	-159.737	-160.85	-159.315	-160.685	-159.685
	59.8	-157.134	-160.457	-159.031	-159.863	-159.139	-158.186	-159.384	-160.082	-161.905	-162.76	-160.553	-160.562	-160.625	-161.391	-161.708	-159.577				59.8	-162.513	-160.155	-158.005	-160.846	-164.343	-170.39	-170.116	-168.632	-169.759	-172.621	-168.521	-166.205	-160.755	-162.549	-153.883	-156.19				59.8	-157.484	-159.16	-160.071	-159.211	-160.679	-159.323	-160.46	-159.46
	59.9	-157.387	-160.102	-159.219	-160.002	-159.83	-158.377	-159.248	-159.985	-161.995	-162.592	-159.34	-161.087	-160.103	-161.9	-161.883	-159.022				59.9	-161.662	-159.753	-158.356	-160.709	-165.173	-170.912	-169.244	-169.229	-168.502	-171.976	-168.615	-167.178	-161.361	-162.966	-155.31	-156.868				59.9	-157.126	-159.732	-160.225	-158.876	-160.33	-159.185	-160.396	-159.396
	60	-157.792	-159.771	-159.557	-159.98	-160.297	-157.741	-159.404	-160.086	-161.998	-162.547	-158.617	-161.053	-159.437	-161.546	-162.224	-158.539				60	-160.936	-159.593	-158.807	-160.375	-165.806	-171.031	-169.161	-169.417	-167.454	-171.977	-168.745	-167.621	-160.731	-162.576	-157.157	-157.601				60	-157.449	-160.822	-160.005	-158.788	-159.774	-158.952	-160.661	-159.661
	60.1	-157.924	-159.659	-159.925	-159.925	-160.1	-157.238	-159.512	-159.962	-161.883	-162.417	-158.934	-160.82	-158.881	-160.282	-162.14	-158.692				60.1	-160.846	-160.113	-159.043	-160.065	-165.917	-170.96	-170.163	-169.374	-167.238	-172.418	-168.828	-167.529	-160.133	-161.211	-158.533	-157.891				60.1	-158.357	-161.457	-159.703	-158.379	-159.598	-158.71	-160.89	-159.89
	60.2	-157.719	-159.688	-160.053	-159.897	-159.514	-157.5	-159.041	-159.621	-161.764	-162.076	-159.828	-160.937	-158.73	-159.125	-161.537	-159.526				60.2	-161.638	-161.134	-158.909	-159.783	-165.751	-171.039	-171.212	-169.472	-167.369	-172.585	-169.209	-167.454	-160.157	-159.856	-158.825	-157.849				60.2	-159.366	-161.145	-159.661	-157.765	-160.077	-158.446	-160.906	-159.906
	60.3	-157.488	-159.591	-160.077	-159.888	-159.497	-158.047	-158.215	-159.497	-161.594	-161.645	-160.199	-161.04	-159.159	-159.132	-160.947	-160.354				60.3	-162.705	-161.601	-158.773	-159.269	-165.583	-171.266	-171.563	-169.917	-167.133	-172.776	-169.884	-167.328	-160.457	-159.462	-158.295	-157.924				60.3	-159.947	-160.612	-159.828	-157.441	-160.499	-158.415	-160.85	-159.85
	60.4	-157.505	-159.243	-160.13	-160.008	-160.081	-158.463	-157.698	-159.594	-161.312	-161.446	-159.882	-160.633	-159.806	-160.021	-160.863	-160.811				60.4	-163.007	-161.018	-159.189	-158.466	-165.248	-171.742	-171.556	-170.553	-166.609	-173.38	-170.372	-166.917	-160.95	-160.075	-157.625	-158.013				60.4	-160.03	-160.572	-159.991	-157.404	-160.451	-158.817	-160.669	-159.669
	60.5	-157.48	-158.827	-160.003	-160.028	-160.484	-158.811	-157.723	-159.523	-160.987	-161.428	-159.719	-160.276	-160.141	-160.92	-161.327	-160.844				60.5	-162.422	-160.087	-159.952	-158.133	-164.684	-172.282	-171.397	-170.826	-166.471	-173.777	-170.61	-166.593	-161.598	-161.066	-157.093	-157.681				60.5	-159.818	-160.7	-160.118	-157.226	-160.291	-158.968	-160.405	-159.405
	60.6	-157.201	-158.61	-159.666	-159.595	-160.289	-158.714	-158.21	-159.162	-160.757	-161.482	-160.084	-160.538	-160.058	-161.372	-162.004	-160.38				60.6	-161.728	-159.523	-160.201	-158.581	-164.093	-172.346	-170.803	-170.402	-167.067	-173.544	-170.743	-166.244	-161.88	-161.994	-156.507	-157.02				60.6	-159.448	-160.324	-160.144	-156.864	-160.156	-158.428	-160.34	-159.34
	60.7	-156.959	-158.566	-159.456	-158.851	-159.673	-157.679	-158.873	-158.842	-160.62	-161.786	-160.54	-160.95	-159.827	-161.196	-162.5	-159.915				60.7	-161.4	-159.528	-159.486	-158.845	-163.822	-171.787	-170.012	-169.601	-167.741	-172.851	-170.658	-165.575	-161.383	-162.742	-155.906	-156.234				60.7	-159.088	-159.58	-159.827	-156.853	-159.963	-158.002	-160.283	-159.283
	60.8	-156.961	-158.445	-159.478	-158.267	-159.115	-156.395	-159.146	-158.968	-160.218	-162.308	-160.67	-160.873	-159.812	-160.715	-162.854	-160.112				60.8	-161.505	-160.203	-158.408	-158.547	-164.097	-171.056	-169.756	-168.852	-167.615	-172.211	-170.354	-165.258	-160.627	-163.077	-155.74	-155.532				60.8	-158.894	-159.305	-159.052	-157.299	-159.756	-158.088	-159.889	-158.889
	60.9	-157.206	-158.326	-159.54	-158.179	-158.784	-155.883	-158.904	-159.412	-159.441	-162.574	-160.576	-160.447	-160.055	-160.539	-163.197	-160.577				60.9	-162.102	-161.246	-158.192	-158.499	-164.542	-170.81	-170.089	-168.351	-166.954	-172.173	-170.144	-165.5	-160.589	-163.122	-155.841	-154.874				60.9	-158.798	-159.848	-158.34	-157.793	-159.574	-158.261	-159.421	-158.421
	61	-157.441	-158.445	-159.749	-158.472	-158.528	-156.069	-158.622	-159.654	-158.931	-162.339	-160.588	-160.3	-160.278	-160.795	-163.12	-160.456				61	-162.744	-161.937	-159.112	-158.924	-164.642	-171.051	-170.376	-168.156	-166.47	-172.75	-170.212	-165.391	-161.386	-163.233	-155.521	-154.226				61	-158.692	-160.647	-158.324	-158.025	-159.559	-158.526	-159.356	-158.356
	61.1	-157.415	-158.86	-160.065	-158.821	-158.381	-156.324	-158.611	-159.541	-159.253	-162.109	-160.924	-160.758	-160.43	-161.234	-162.416	-159.887				61.1	-162.719	-162.044	-160.235	-159.1	-164.597	-171.286	-170.366	-168.304	-166.186	-173.463	-170.545	-164.827	-162.432	-163.268	-154.928	-154.182				61.1	-158.613	-161.181	-158.624	-157.828	-159.776	-159.064	-159.719	-158.719
	61.2	-157.468	-159.396	-159.879	-159.378	-158.464	-156.387	-158.677	-159.411	-160.123	-162.138	-161.477	-161.357	-160.786	-161.503	-161.591	-159.578				61.2	-162.196	-161.877	-160.804	-158.58	-164.743	-171.425	-170.432	-168.833	-165.803	-173.995	-171.149	-164.767	-163.262	-162.962	-154.77	-155.132				61.2	-158.711	-161.303	-158.654	-157.453	-159.961	-159.673	-160.184	-159.184
	61.3	-158.014	-159.803	-159.2	-160.034	-158.497	-156.418	-158.639	-159.435	-160.713	-161.913	-161.785	-161.404	-161.433	-161.294	-161.146	-159.548				61.3	-162.113	-161.48	-160.808	-157.891	-165.052	-171.437	-170.705	-169.38	-165.546	-174.23	-171.614	-165.425	-163.445	-162.344	-155.185	-156.544				61.3	-159.047	-161	-158.775	-157.337	-159.879	-160.132	-160.502	-159.502
	61.4	-158.882	-160.056	-158.854	-160.073	-158.279	-156.581	-158.653	-159.355	-160.67	-161.367	-161.583	-160.764	-161.956	-160.939	-160.888	-159.417				61.4	-162.737	-160.863	-160.652	-157.646	-165.521	-171.236	-170.822	-169.623	-165.777	-174.214	-171.296	-166.006	-162.812	-161.782	-155.999	-157.568				61.4	-159.427	-160.447	-159.07	-157.492	-159.608	-160.436	-160.598	-159.598
	61.5	-159.379	-160.231	-159.186	-159.536	-158.288	-156.839	-158.827	-159.12	-160.397	-161.212	-161.117	-159.808	-161.755	-160.97	-160.396	-159.394				61.5	-163.064	-160.564	-160.748	-157.728	-166.054	-170.863	-170.791	-169.925	-166.579	-174.12	-170.437	-166.116	-161.706	-161.79	-156.884	-158.074				61.5	-159.461	-159.85	-158.93	-157.839	-159.459	-160.568	-160.507	-159.507
	61.6	-159.167	-160.185	-159.598	-159.217	-158.819	-156.938	-159.244	-159.146	-160.237	-161.813	-160.665	-158.899	-161.01	-161.15	-160.031	-159.899				61.6	-162.447	-161.001	-161.133	-157.979	-166.52	-170.34	-170.879	-170.424	-167.709	-174.102	-169.812	-165.914	-160.547	-162.358	-157.317	-158.403				61.6	-158.87	-159.478	-158.289	-158.457	-159.526	-160.331	-160.497	-159.497
	61.7	-158.653	-159.737	-159.44	-159.17	-159.577	-156.93	-159.775	-159.606	-160.081	-162.659	-160.303	-158.204	-160.577	-161.081	-160.36	-160.627				61.7	-161.897	-161.858	-161.534	-158.667	-166.858	-169.879	-170.934	-170.821	-168.574	-174.26	-169.74	-165.642	-159.6	-162.935	-157.174	-158.34				61.7	-157.983	-159.531	-157.757	-159.27	-159.581	-159.631	-160.791	-159.791
	61.8	-158.211	-159.083	-158.96	-158.876	-160.072	-157.102	-159.8	-160.161	-159.943	-163.155	-160.26	-158.06	-160.746	-161.003	-161.061	-160.913				61.8	-162.154	-162.421	-161.615	-159.647	-166.846	-169.828	-170.944	-170.881	-168.896	-174.552	-170.093	-165.495	-159.329	-163.062	-156.554	-157.737				61.8	-157.406	-159.579	-157.733	-159.904	-159.696	-159.007	-161.239	-160.239
	61.9	-157.907	-158.662	-158.971	-158.566	-159.93	-157.185	-159.023	-160.642	-160.192	-163.221	-160.759	-158.514	-161.07	-161.124	-161.489	-160.774				61.9	-162.375	-162.452	-160.953	-160.386	-166.334	-170.368	-170.958	-170.429	-168.713	-174.673	-170.433	-165.263	-160.023	-162.715	-155.703	-157.166				61.9	-157.283	-159.235	-158.052	-160.044	-160.058	-158.94	-161.59	-160.59
	62	-157.75	-158.652	-159.704	-158.648	-159.344	-156.859	-157.984	-161.09	-161.038	-163.237	-161.417	-158.975	-161.073	-161.189	-161.468	-160.718				62	-161.862	-162.313	-159.539	-160.763	-165.652	-171.195	-170.621	-169.801	-168.011	-174.345	-170.489	-164.725	-161.002	-162.177	-155.489	-157.236				62	-157.599	-159.004	-158.426	-159.835	-160.212	-159.143	-161.671	-160.671
	62.1	-157.623	-158.786	-160.357	-158.786	-159.078	-156.628	-157.225	-161.237	-162.001	-163.708	-161.699	-159.346	-160.73	-160.932	-161.337	-160.661				62.1	-161.292	-162.155	-158.054	-160.645	-165.406	-171.552	-169.854	-169.614	-167.113	-173.829	-170.5	-164.445	-161.135	-161.67	-156.414	-158.044				62.1	-158.443	-159.371	-158.922	-159.554	-159.917	-159.162	-161.336	-160.336
	62.2	-157.484	-158.746	-160.181	-158.644	-159.247	-157.199	-156.911	-160.674	-162.57	-164.376	-161.678	-159.984	-160.509	-160.661	-161.625	-160.2				62.2	-161.53	-161.953	-157.312	-160	-165.639	-171.257	-169.132	-169.938	-166.341	-173.575	-170.536	-165.136	-160.341	-161.167	-157.374	-158.982				62.2	-159.379	-159.968	-159.571	-159.371	-159.847	-158.926	-160.673	-159.673
	62.3	-157.565	-158.437	-159.558	-158.545	-159.195	-158.154	-157.168	-159.506	-162.632	-164.524	-161.662	-160.619	-160.55	-160.683	-162.269	-159.492				62.3	-162.222	-162.04	-157.531	-159.421	-165.641	-171.345	-168.62	-170.381	-165.856	-173.509	-170.385	-166.354	-159.611	-160.781	-157.219	-159.387				62.3	-159.733	-160.189	-159.994	-159.325	-160.196	-158.897	-160.167	-159.167
	62.4	-157.823	-158.019	-159.089	-159.027	-158.983	-158.538	-157.726	-158.469	-161.944	-163.979	-161.513	-160.815	-160.561	-160.702	-162.59	-159.077				62.4	-162.492	-162.562	-158.053	-159.27	-165.128	-172.35	-168.243	-170.538	-165.969	-173.45	-169.984	-166.939	-159.489	-160.573	-156.467	-159.206				62.4	-159.474	-159.902	-159.839	-159.363	-160.291	-159.588	-160.184	-159.184
	62.5	-157.896	-157.85	-158.776	-159.919	-159.157	-158.294	-157.975	-158.091	-160.809	-163.056	-161.058	-160.674	-160.518	-160.49	-162.335	-159.17				62.5	-162.163	-162.99	-158.299	-159.43	-164.762	-172.875	-168.336	-170.373	-166.483	-173.371	-169.343	-166.579	-159.786	-160.508	-156.081	-158.732				62.5	-159.005	-159.617	-159.239	-159.407	-159.999	-160.545	-160.452	-159.452
	62.6	-157.833	-158.085	-158.598	-160.355	-159.452	-158.025	-158.187	-158.181	-160.518	-162.388	-160.925	-160.467	-160.439	-160.211	-161.84	-159.433				62.6	-161.662	-162.663	-158.504	-159.733	-164.994	-171.843	-169.128	-170.088	-166.785	-173.005	-168.663	-165.759	-160.302	-160.888	-156.194	-158.213				62.6	-158.583	-159.929	-158.592	-159.215	-159.816	-160.857	-160.762	-159.762
	62.7	-157.876	-158.457	-158.715	-160.122	-159.369	-157.822	-158.754	-158.426	-161.696	-162.383	-161.441	-160.381	-160.062	-160.171	-161.278	-159.682				62.7	-161.242	-161.563	-158.848	-159.862	-165.525	-170.293	-170.042	-169.726	-166.846	-172.237	-168.244	-164.901	-161.119	-161.639	-156.378	-157.729				62.7	-158.362	-160.678	-158.288	-158.688	-159.811	-160.257	-161.251	-160.251
	62.8	-157.822	-158.88	-159.066	-159.766	-159.285	-157.437	-158.862	-158.755	-163.406	-162.557	-161.686	-160.378	-159.479	-160.382	-160.553	-159.98				62.8	-161.013	-160.336	-158.976	-159.644	-165.895	-169.746	-170.529	-169.332	-167.111	-171.552	-168.25	-164.704	-162.225	-161.971	-156.216	-157.22				62.8	-158.409	-161.027	-158.262	-158.116	-159.791	-159.036	-161.699	-160.699
	62.9	-157.442	-159.575	-159.53	-159.651	-159.546	-157.049	-158.162	-159.156	-164.391	-162.369	-161.236	-160.286	-159.466	-160.62	-159.882	-160.244				62.9	-161.128	-159.731	-158.855	-159.466	-165.909	-170.384	-170.727	-169.248	-167.784	-171.452	-168.827	-165.776	-162.873	-161.555	-155.789	-156.553				62.9	-158.48	-160.609	-158.127	-157.938	-159.873	-157.906	-161.793	-160.793
	63	-156.986	-160.146	-160.037	-159.697	-159.655	-157.019	-157.653	-159.519	-164.292	-161.82	-160.728	-160.137	-160.31	-160.929	-159.682	-160.464				63	-161.53	-159.969	-158.844	-159.905	-165.687	-171.412	-170.65	-169.523	-168.494	-172.157	-169.711	-167.308	-162.279	-160.819	-155.413	-155.919				63	-158.153	-160.028	-158.041	-158.351	-160.129	-157.649	-161.678	-160.678
	63.1	-156.953	-159.95	-160.306	-159.474	-159.254	-157.341	-157.956	-159.595	-163.536	-161.106	-160.376	-159.979	-161.107	-161.325	-160.123	-160.737				63.1	-161.927	-160.738	-158.96	-160.944	-165.558	-172.091	-170.092	-169.597	-168.609	-173.511	-170.015	-168.011	-160.951	-160.289	-155.375	-155.583				63.1	-157.621	-159.815	-158.305	-159.011	-160.456	-157.98	-161.532	-160.532
	63.2	-157.403	-159.266	-160.109	-158.937	-158.876	-157.531	-158.491	-159.352	-162.469	-160.68	-159.982	-159.667	-161.092	-161.522	-160.974	-161.018				63.2	-162.205	-161.456	-158.948	-161.967	-165.824	-172.081	-169.771	-169.418	-168.046	-174.646	-169.507	-168.05	-159.957	-160.202	-156.097	-155.726				63.2	-157.62	-159.809	-158.936	-159.479	-160.704	-158.113	-161.294	-160.294
	63.3	-157.809	-158.874	-159.636	-158.673	-159.019	-157.245	-158.363	-159.371	-161.188	-160.934	-159.712	-159.275	-160.593	-161.571	-161.623	-161.096				63.3	-162.729	-161.624	-159.006	-162.369	-166.306	-171.837	-170.579	-169.43	-167.418	-174.617	-169.039	-168.073	-159.83	-160.658	-157.335	-156.273				63.3	-158.194	-159.714	-159.885	-159.802	-160.832	-158.283	-160.895	-159.895
	63.4	-157.82	-158.933	-159.424	-158.737	-159.642	-156.796	-157.608	-160.1	-160.128	-161.66	-159.683	-159.052	-160.294	-161.627	-161.555	-160.715				63.4	-163.814	-161.305	-159.38	-162.023	-166.526	-172.011	-171.738	-169.404	-167.151	-173.77	-169.174	-167.577	-160.374	-161.641	-157.855	-156.776				63.4	-158.555	-159.563	-160.76	-160.034	-160.924	-158.985	-160.48	-159.48
	63.5	-157.511	-159.095	-159.628	-158.657	-160.405	-156.798	-157.142	-160.951	-160.125	-162.289	-159.725	-158.977	-160.365	-161.404	-160.981	-159.992				63.5	-164.944	-160.807	-159.799	-161.078	-166.274	-172.265	-171.757	-168.998	-167.053	-173.147	-169.748	-166.367	-160.741	-162.541	-157.191	-157.278				63.5	-158.324	-159.599	-160.878	-160.034	-160.752	-159.679	-160.294	-159.294
	63.6	-157.188	-159.083	-159.861	-158.696	-160.914	-157.266	-157.27	-161.025	-161.233	-162.39	-159.912	-159.008	-160.601	-160.798	-160.708	-159.598				63.6	-165.012	-160.405	-160.024	-159.938	-165.917	-172.126	-170.5	-168.833	-166.839	-172.83	-170.429	-165.478	-160.352	-162.526	-156.38	-157.762				63.6	-157.862	-159.874	-160.132	-159.812	-160.191	-159.691	-160.379	-159.379
	63.7	-157.304	-158.829	-160.053	-159.234	-161.085	-157.554	-157.482	-160.408	-162.311	-162.2	-160.429	-159.322	-160.827	-160.077	-161.229	-159.906				63.7	-163.803	-160.355	-160.068	-159.02	-165.849	-171.866	-169.148	-169.442	-166.743	-172.257	-170.595	-165.421	-159.549	-161.817	-156.18	-157.484				63.7	-157.538	-160.085	-159.232	-159.416	-159.622	-159.313	-160.498	-159.498
	63.8	-157.766	-158.468	-160.384	-159.609	-161.005	-157.634	-157.641	-159.725	-162.549	-162.286	-161.019	-159.787	-160.979	-159.481	-162.043	-160.397				63.8	-162.306	-160.599	-159.87	-158.248	-165.492	-171.813	-168.784	-170.226	-166.827	-171.478	-169.892	-166.041	-159.135	-161.418	-156.065	-156.392				63.8	-157.555	-159.821	-158.909	-158.97	-159.308	-159.205	-160.251	-159.251
	63.9	-157.961	-158.146	-160.431	-159.349	-160.574	-158.035	-157.824	-159.306	-162.272	-162.505	-161.199	-159.814	-161.122	-159.221	-162.304	-160.529				63.9	-161.409	-160.731	-159.588	-157.763	-164.518	-171.89	-169.513	-170.528	-166.612	-171.135	-169.025	-166.927	-159.55	-161.529	-155.566	-155.476				63.9	-158.034	-159.128	-159.179	-158.643	-159.336	-159.559	-159.734	-158.734
	64	-157.952	-158.119	-159.837	-159.061	-159.829	-158.479	-157.728	-159.2	-161.89	-162.485	-160.84	-159.229	-161.185	-159.351	-162.007	-160.326				64	-161.119	-160.706	-159.614	-158.345	-163.801	-171.844	-170.429	-170.243	-166.183	-171.5	-168.751	-167.46	-160.416	-161.583	-155.032	-155.184				64	-158.818	-158.681	-159.479	-158.47	-159.58	-159.992	-159.653	-158.653
	64.1	-158.299	-158.573	-159.278	-159.193	-159.328	-158.499	-157.176	-159.298	-161.244	-162.432	-160.445	-158.631	-160.782	-159.691	-161.604	-159.804				64.1	-161.08	-160.908	-159.901	-159.863	-163.57	-171.608	-170.488	-169.499	-166.336	-171.978	-168.95	-167.417	-160.898	-161.598	-155.178	-155.327				64.1	-159.335	-158.807	-159.462	-158.315	-159.58	-160.111	-160.051	-159.051
	64.2	-158.87	-159.061	-159.298	-159.309	-159.393	-158.369	-156.567	-159.736	-160.48	-162.479	-160.422	-158.451	-159.929	-160.163	-161.072	-158.948				64.2	-161.157	-161.351	-159.899	-160.926	-163.258	-171.586	-169.775	-168.944	-167.245	-171.963	-169.294	-166.882	-160.722	-162.056	-156.12	-155.758				64.2	-159.284	-159.272	-159.382	-158.127	-159.145	-160.042	-160.35	-159.35
	64.3	-159.003	-159.088	-159.477	-159.1	-159.506	-158.36	-156.48	-160.503	-160.266	-162.551	-160.549	-158.671	-159.347	-160.694	-160.398	-158.328				64.3	-161.421	-161.615	-159.432	-160.73	-162.972	-172.099	-169.071	-169.214	-167.968	-171.938	-169.766	-166.121	-160.534	-162.792	-157.125	-156.131				64.3	-158.918	-159.717	-159.444	-158.081	-158.739	-160.001	-160.65	-159.65
	64.4	-158.535	-158.969	-159.535	-158.88	-159.138	-158.374	-156.882	-160.763	-160.629	-162.796	-160.679	-159.335	-159.323	-161.067	-160.07	-158.844				64.4	-161.87	-161.419	-159.084	-159.681	-163.324	-172.713	-168.503	-170.072	-167.964	-172.61	-170.301	-165.665	-160.853	-163.177	-157.679	-156.36				64.4	-158.561	-159.787	-159.398	-158.255	-158.837	-159.963	-161.284	-160.284
	64.5	-158.103	-159.072	-159.492	-158.827	-158.613	-158.438	-157.22	-160.204	-161.077	-163.132	-161.013	-160.09	-159.295	-160.967	-160.356	-160.24				64.5	-162.369	-160.901	-159.213	-158.823	-164.14	-172.652	-168.028	-170.762	-167.966	-173.535	-170.813	-165.831	-161.207	-163.123	-157.676	-156.636				64.5	-158.515	-159.682	-159.228	-158.494	-159.133	-159.945	-161.804	-160.804
	64.6	-158.142	-159.359	-159.278	-158.787	-158.489	-158.727	-157.233	-159.921	-161.362	-163.034	-161.623	-160.317	-159.168	-160.41	-160.875	-161.051				64.6	-162.611	-160.621	-159.501	-159.034	-164.631	-171.956	-167.788	-170.636	-168.141	-173.753	-171.241	-166.342	-161.076	-163.124	-157.089	-156.693				64.6	-158.797	-159.894	-159.157	-158.587	-159.217	-160.086	-161.693	-160.693
	64.7	-158.257	-159.72	-159.162	-158.764	-158.702	-158.968	-157.171	-160.544	-161.33	-162.409	-162.222	-160.238	-159.204	-159.854	-161.296	-160.845				64.7	-162.497	-160.789	-159.58	-159.954	-164.678	-171.435	-167.766	-170.088	-167.727	-173.241	-171.371	-166.639	-160.89	-162.947	-156.289	-156.302				64.7	-158.952	-160.301	-159.134	-158.502	-159.134	-160.448	-161.256	-160.256
	64.8	-158.099	-159.838	-159.474	-159.012	-158.997	-158.656	-157.255	-161.283	-161.022	-161.871	-162.442	-160.349	-159.18	-159.692	-161.515	-160.386				64.8	-162.273	-160.76	-159.439	-160.614	-164.83	-171.331	-167.792	-170.295	-166.962	-172.627	-171.434	-166.583	-161.269	-161.934	-155.729	-155.792				64.8	-158.896	-160.474	-159.036	-158.553	-158.91	-160.831	-161.097	-160.097
	64.9	-157.82	-159.401	-159.839	-159.667	-159.215	-157.947	-157.151	-161.302	-160.776	-161.713	-162.271	-160.392	-159.104	-160.026	-161.397	-160.101				64.9	-161.983	-160.221	-159.479	-160.728	-165.107	-171.261	-167.594	-171.169	-166.71	-172.162	-171.733	-166.364	-161.931	-160.768	-155.608	-155.679				64.9	-158.924	-160.194	-159.011	-158.99	-158.706	-160.96	-161.311	-160.311
	65	-157.581	-158.858	-159.752	-160.42	-159.195	-157.649	-156.918	-160.663	-160.627	-161.479	-162.006	-159.852	-159.377	-160.818	-161.224	-160.021				65	-161.73	-159.856	-160.094	-160.447	-164.908	-171	-167.193	-171.533	-166.964	-171.966	-171.792	-166.177	-162.106	-160.696	-156.06	-155.917				65	-158.875	-159.446	-159.187	-159.445	-158.722	-160.792	-161.524	-160.524
	65.1	-157.655	-158.905	-159.204	-160.783	-158.918	-158.059	-157.359	-159.907	-160.343	-161.032	-161.696	-158.827	-159.95	-161.596	-161.417	-160.17				65.1	-161.813	-160.214	-160.837	-160.154	-164.053	-170.647	-167.001	-171.162	-167.215	-172.06	-171.351	-166.126	-161.427	-161.523	-156.835	-155.935				65.1	-158.543	-158.638	-159.414	-159.478	-158.881	-160.211	-161.399	-160.399
	65.2	-158.022	-159.431	-158.57	-160.603	-158.507	-158.467	-158.267	-159.35	-160.308	-160.85	-161.112	-158.023	-160.339	-161.696	-161.746	-160.456				65.2	-162.024	-160.982	-161.04	-160.319	-163.233	-170.524	-167.437	-170.698	-167.164	-171.977	-170.826	-165.906	-160.102	-162.198	-157.32	-155.668				65.2	-158.268	-158.506	-159.543	-159.204	-159.061	-159.366	-160.99	-159.99
	65.3	-158.168	-159.717	-158.363	-159.805	-158.361	-157.896	-158.501	-159.09	-160.885	-161.091	-160.415	-157.84	-160.121	-161.303	-161.756	-160.842				65.3	-161.912	-161.459	-161.051	-160.589	-162.972	-170.881	-168.434	-170.337	-166.903	-171.494	-170.506	-165.4	-158.84	-162.278	-157.06	-155.995				65.3	-158.471	-159.116	-159.582	-159.046	-159.186	-158.831	-160.662	-159.662
	65.4	-158.07	-159.324	-158.701	-158.711	-158.833	-156.342	-158.222	-159.244	-161.321	-161.56	-160.04	-158.215	-159.405	-161.087	-161.329	-161.117				65.4	-161.671	-161.453	-161.534	-160.196	-162.919	-171.341	-169.406	-169.921	-166.882	-171.22	-170.348	-165.215	-158.091	-161.741	-156.123	-157.344				65.4	-159.138	-159.589	-159.767	-159.178	-159.312	-158.812	-160.611	-159.611
	65.5	-158.198	-158.751	-159.081	-158.151	-159.591	-155.162	-158.359	-159.877	-161.113	-162.212	-159.965	-158.974	-158.918	-161.185	-160.742	-160.918				65.5	-161.736	-161.459	-162.178	-159.325	-162.709	-171.364	-169.991	-169.384	-167.441	-171.591	-170.4	-165.547	-157.702	-160.724	-155.099	-158.625				65.5	-159.802	-159.311	-160.158	-159.221	-159.582	-159.161	-160.768	-159.768
	65.6	-158.552	-158.644	-159.216	-158.429	-160.147	-155.52	-158.631	-160.675	-160.959	-163.005	-159.923	-159.759	-159.238	-161.378	-160.452	-160.37				65.6	-161.986	-161.769	-162.212	-158.643	-162.742	-171.302	-170.379	-168.856	-168.433	-172.251	-170.73	-165.72	-157.56	-159.812	-154.787	-158.729				65.6	-160.198	-158.657	-160.468	-158.889	-159.764	-159.582	-161.094	-160.094
	65.7	-158.897	-159.102	-159.563	-159.035	-160.551	-156.805	-158.435	-160.987	-161.177	-163.549	-160.038	-160.26	-160.058	-161.453	-160.471	-159.936				65.7	-162.046	-161.982	-161.425	-158.427	-163.37	-171.504	-170.758	-168.71	-169.337	-172.678	-170.91	-165.245	-157.874	-159.483	-155.402	-157.918				65.7	-160.478	-158.254	-160.733	-158.668	-159.499	-159.68	-161.408	-160.408
	65.8	-159.321	-160.006	-160.145	-159.401	-160.859	-157.593	-158.343	-160.572	-161.402	-163.363	-160.496	-160.506	-160.518	-161.266	-160.513	-159.893				65.8	-162.095	-161.665	-160.189	-158.594	-164.366	-171.766	-170.594	-168.986	-169.596	-172.581	-170.379	-164.462	-158.645	-159.836	-156.358	-157.168				65.8	-160.598	-158.192	-160.928	-159.022	-158.864	-159.353	-161.515	-160.515
	65.9	-159.641	-160.841	-160.289	-159.558	-160.961	-157.663	-158.707	-160.01	-161.642	-162.485	-161.073	-160.685	-160.234	-161.038	-160.59	-160.101				65.9	-162.342	-160.963	-159.194	-158.864	-165.313	-172.045	-169.635	-169.436	-169.057	-172.029	-169.32	-164.38	-159.362	-160.978	-157.122	-156.962				65.9	-160.249	-158.276	-160.398	-159.46	-158.381	-158.828	-161.662	-160.662
	66	-159.241	-161.05	-159.951	-159.701	-160.693	-157.815	-158.761	-159.807	-161.917	-161.514	-161.443	-160.912	-159.571	-160.968	-160.699	-160.154				66	-162.4	-160.292	-158.902	-158.994	-165.841	-172.083	-168.942	-170.183	-168.225	-171.55	-168.522	-165.506	-159.63	-162.578	-157.655	-157.037				66	-159.287	-158.504	-159.32	-159.311	-158.451	-158.515	-161.894	-160.894
	66.1	-158.081	-160.632	-159.641	-159.7	-160.1	-158.178	-158.273	-159.827	-161.885	-161.143	-161.519	-161.156	-158.866	-160.745	-160.608	-159.911				66.1	-162.06	-159.823	-159.18	-158.872	-165.859	-171.47	-169.385	-171.165	-167.733	-171.891	-168.692	-166.834	-159.641	-163.373	-158.279	-157.166				66.1	-158.103	-158.885	-159.037	-158.908	-158.666	-158.566	-161.594	-160.594
	66.2	-157.037	-159.781	-159.511	-159.367	-159.527	-158.118	-157.847	-159.827	-161.52	-161.583	-161.589	-161.074	-158.184	-160.164	-160.45	-159.613				66.2	-161.71	-159.427	-159.433	-158.643	-165.518	-170.574	-170.41	-171.595	-167.53	-172.892	-169.518	-167.024	-159.736	-162.912	-158.986	-157.189				66.2	-157.518	-159.129	-159.783	-158.928	-158.5	-158.786	-160.812	-159.812
	66.3	-156.886	-158.899	-159.605	-158.693	-159.252	-157.568	-157.786	-159.851	-161.199	-162.417	-161.722	-160.536	-157.722	-159.482	-160.502	-159.53				66.3	-161.671	-158.995	-159.291	-158.664	-165.19	-170.073	-170.982	-171.022	-167.167	-173.507	-169.882	-166.118	-160.298	-162.489	-159.333	-156.662				66.3	-157.778	-158.983	-160.4	-159.229	-158.115	-159.034	-160.325	-159.325
	66.4	-157.371	-158.535	-159.991	-157.953	-159.424	-157.186	-157.878	-159.883	-161.25	-162.9	-161.557	-160.102	-157.795	-159.353	-160.7	-159.597				66.4	-161.843	-158.921	-158.782	-158.995	-165.374	-170.119	-170.701	-169.824	-166.758	-173.485	-169.477	-165.074	-161.602	-163.053	-159.191	-155.577				66.4	-158.349	-158.67	-160.449	-159.3	-158.093	-159.207	-160.178	-159.178
	66.5	-157.626	-158.723	-160.401	-157.757	-159.925	-157.234	-157.995	-159.573	-161.677	-162.679	-161.134	-159.969	-158.481	-160.189	-160.856	-159.602				66.5	-162.067	-159.615	-158.212	-159.445	-165.871	-170.263	-169.854	-168.6	-166.7	-173.462	-169.03	-164.656	-162.967	-164.01	-158.704	-154.692				66.5	-158.789	-158.565	-160.525	-159.21	-158.711	-159.269	-160.084	-159.084
	66.6	-157.484	-159.018	-160.48	-158.342	-160.132	-157.657	-158.316	-158.99	-162.233	-162.236	-160.782	-159.794	-159.424	-161.428	-160.768	-159.644				66.6	-162.251	-160.71	-158.208	-159.912	-165.998	-170.071	-168.969	-167.965	-166.987	-173.558	-168.986	-165.281	-162.976	-164.38	-157.928	-154.704				66.6	-158.737	-158.854	-160.712	-159.254	-159.535	-159.265	-160.329	-159.329
	66.7	-157.436	-159.262	-160.182	-159.31	-159.665	-158.4	-158.606	-158.921	-162.615	-162.184	-160.621	-159.643	-160.161	-162.374	-160.401	-159.816				66.7	-162.366	-161.481	-158.964	-160.207	-165.784	-169.827	-168.536	-168.394	-167.476	-173.437	-169.355	-166.753	-161.273	-163.809	-156.845	-155.421				66.7	-158.186	-159.332	-160.42	-159.382	-160.075	-159.162	-161.004	-160.004
	66.8	-157.578	-159.529	-159.81	-160.129	-159.196	-158.911	-158.136	-159.586	-162.57	-162.511	-160.838	-159.758	-160.46	-162.859	-160.279	-159.855				66.8	-162.582	-161.788	-159.801	-160.236	-165.524	-170.095	-168.775	-169.574	-167.931	-173.148	-170.176	-168.21	-159.601	-162.713	-155.797	-156.244				66.8	-157.693	-159.551	-159.551	-159.573	-160.333	-159.064	-161.543	-160.543
	66.9	-157.768	-159.539	-159.706	-160.311	-159.324	-158.813	-156.953	-160.344	-161.978	-162.761	-161.441	-159.925	-160.512	-162.774	-160.893	-159.56				66.9	-163.123	-161.779	-160.036	-160.248	-164.92	-170.889	-169.204	-170.615	-168.082	-172.939	-171.08	-168.936	-159.562	-161.695	-155.416	-156.718				66.9	-157.469	-159.439	-158.564	-159.684	-160.421	-159.322	-161.535	-160.535
	67	-158.188	-159.017	-159.974	-159.734	-159.386	-158.423	-155.981	-160.622	-160.982	-162.635	-161.995	-159.747	-160.601	-162.228	-161.737	-159.166				67	-163.594	-161.223	-159.796	-160.157	-164.005	-171.692	-169.093	-170.899	-168.158	-172.81	-171.457	-168.897	-160.312	-161.009	-155.552	-156.859				67	-157.448	-159.46	-157.917	-159.259	-160.307	-159.827	-161.18	-160.18
	67.1	-158.947	-158.121	-160.345	-158.894	-158.928	-157.924	-155.796	-160.189	-160.287	-162.423	-162.179	-159.149	-160.645	-161.51	-161.996	-159.091				67.1	-163.27	-160.26	-159.798	-159.763	-163.486	-171.766	-168.584	-170.401	-168.383	-172.64	-171.272	-168.313	-160.426	-160.71	-155.284	-157.234				67.1	-157.8	-159.686	-157.899	-158.395	-160.027	-159.799	-160.984	-159.984
	67.2	-159.878	-157.266	-160.484	-158.317	-158.755	-157.188	-156.088	-159.291	-160.318	-162.594	-162.082	-158.611	-160.601	-160.707	-161.83	-159.327				67.2	-162.14	-159.586	-160.205	-159.535	-163.589	-170.99	-168.406	-169.652	-168.571	-172.445	-170.893	-167.295	-160.049	-160.846	-154.666	-157.835				67.2	-158.144	-159.828	-158.254	-157.955	-159.713	-159.14	-161.19	-160.19
	67.3	-160.429	-157.051	-160.411	-158.112	-159.264	-156.603	-156.241	-158.828	-160.627	-162.979	-162.039	-158.609	-160.723	-160.083	-161.929	-159.381				67.3	-160.881	-159.437	-160.288	-160.177	-163.555	-170.215	-168.734	-169.163	-168.549	-172.235	-170.37	-166.399	-159.935	-161.196	-154.527	-157.946				67.3	-157.969	-159.98	-158.629	-158.106	-159.43	-158.691	-161.576	-160.576
	67.4	-160.073	-157.758	-160.111	-158.112	-159.638	-156.676	-156.323	-159.339	-160.832	-163.191	-162.071	-158.881	-161.12	-159.991	-162.254	-159.182				67.4	-160.153	-159.636	-159.67	-161.592	-162.966	-170.272	-169.098	-168.881	-168.434	-172.121	-169.568	-166.624	-160.417	-161.33	-154.819	-157.55				67.4	-157.798	-160.157	-159.112	-158.026	-159.162	-158.721	-161.682	-160.682
	67.5	-159.098	-158.829	-159.324	-158.349	-159.338	-157.437	-156.84	-160.118	-160.946	-163.276	-161.748	-159.068	-161.339	-160.28	-162.117	-159.114				67.5	-160.217	-159.895	-158.95	-162.503	-162.462	-171.06	-169.246	-168.693	-168.37	-172.361	-168.815	-167.9	-161.195	-161.094	-155.197	-157.018				67.5	-158.202	-160.106	-159.527	-157.722	-158.786	-158.846	-161.416	-160.416
	67.6	-158.125	-159.441	-158.261	-158.94	-158.798	-158.485	-157.613	-160.502	-161.058	-163.082	-161.035	-159.303	-160.839	-160.47	-161.442	-159.412				67.6	-161.044	-160.201	-158.708	-162.151	-162.574	-171.767	-169.522	-168.966	-168.351	-172.904	-168.479	-168.715	-161.584	-160.858	-155.751	-156.521				67.6	-158.729	-160.01	-159.42	-158.021	-158.331	-159.006	-161.271	-160.271
	67.7	-157.667	-159.366	-157.784	-159.645	-158.577	-159.15	-158.167	-160.783	-161.157	-162.328	-160.556	-159.748	-159.871	-160.268	-160.983	-159.939				67.7	-162.016	-160.766	-158.967	-161.203	-163.111	-171.872	-170.363	-169.543	-168.225	-173.37	-168.263	-168.322	-161.47	-161.162	-156.08	-156.456				67.7	-158.964	-160.121	-158.889	-158.612	-158.193	-159.257	-161.503	-160.503
	67.8	-158.001	-159.124	-158.325	-160.27	-158.681	-159.06	-158.51	-160.904	-161.167	-161.549	-160.51	-160.24	-159.071	-159.987	-161.222	-160.303				67.8	-162.148	-161.056	-159.436	-160.248	-163.654	-171.707	-171.529	-169.482	-167.902	-173.388	-167.84	-167.559	-161.356	-161.929	-155.566	-156.86				67.8	-159.199	-160.174	-158.561	-158.623	-158.532	-159.398	-161.737	-160.737
	67.9	-158.48	-159.344	-159.365	-160.751	-158.882	-158.462	-158.619	-160.172	-161.209	-161.27	-160.303	-160.423	-158.772	-160.116	-161.974	-160.394				67.9	-161.498	-160.455	-159.858	-159.371	-164.135	-171.9	-171.929	-168.715	-167.657	-173.013	-167.708	-167.041	-161.34	-162.383	-154.536	-157.111				67.9	-159.522	-160.078	-158.513	-158.258	-159.089	-159.418	-161.626	-160.626
	68	-158.343	-159.872	-160.221	-160.837	-159.032	-157.9	-158.204	-159.039	-161.419	-161.186	-159.793	-160.374	-158.897	-160.511	-162.662	-160.372				68	-160.891	-159.732	-160.113	-158.901	-164.568	-172.489	-170.729	-168.053	-167.741	-172.847	-168.471	-166.441	-161.094	-162.192	-154.02	-156.713				68	-159.713	-160.012	-158.357	-158.161	-159.538	-159.574	-161.232	-160.232
	68.1	-158.115	-160.109	-160.506	-160.659	-158.998	-157.758	-157.457	-158.708	-161.606	-161.173	-159.626	-160.611	-159.05	-160.869	-162.69	-160.324				68.1	-160.657	-159.762	-160.12	-159.223	-164.825	-173.162	-168.854	-167.754	-167.971	-173.136	-169.729	-165.835	-160.579	-161.531	-154.649	-155.867				68.1	-159.825	-159.812	-158.159	-158.245	-159.521	-159.919	-160.81	-159.81
	68.2	-158.56	-159.919	-160.161	-160.607	-158.871	-158.125	-157.283	-159.202	-161.673	-161.573	-159.984	-161.143	-159.004	-161.14	-161.995	-160.285				68.2	-160.717	-160.351	-160.168	-160.294	-165.023	-173.341	-168.251	-167.636	-168.15	-173.535	-170.424	-165.751	-159.961	-160.588	-156.056	-155.232				68.2	-159.976	-159.452	-158.043	-158.092	-158.865	-160.246	-160.493	-159.493
	68.3	-159.32	-159.546	-159.563	-160.537	-159.003	-158.682	-158.002	-159.725	-161.537	-162.208	-160.501	-161.296	-158.812	-161.293	-161.186	-160.138				68.3	-161.026	-160.98	-160.655	-161.307	-165.064	-172.599	-169.219	-167.706	-168.307	-173.92	-169.926	-166.124	-159.374	-159.735	-157.283	-155.053				68.3	-160.096	-159.245	-157.849	-158.035	-157.923	-160.423	-160.202	-159.202
	68.4	-159.69	-159.093	-159.248	-160.107	-159.482	-158.847	-158.853	-159.929	-161.057	-162.427	-160.928	-160.654	-158.525	-161.302	-160.761	-159.868				68.4	-161.438	-161.373	-161.459	-161.378	-164.653	-171.509	-170.1	-167.898	-168.446	-174.305	-168.613	-166.457	-159.352	-159.522	-157.65	-154.863				68.4	-160.006	-159.364	-157.72	-158.503	-157.38	-160.495	-160.053	-159.053
	68.5	-159.523	-158.533	-159.529	-159.415	-160.049	-158.472	-159.198	-160.016	-160.588	-161.976	-161.167	-159.399	-158.379	-161.333	-160.695	-159.739				68.5	-161.842	-161.438	-162.064	-160.697	-163.901	-170.974	-169.752	-168.043	-168.201	-174.474	-167.279	-166.289	-160.255	-160.186	-157.164	-154.496				68.5	-159.682	-159.756	-157.971	-159.11	-157.434	-160.294	-160.245	-159.245
	68.6	-159.1	-158.28	-160.126	-158.908	-160.584	-158.105	-159.129	-160.166	-160.511	-161.231	-161.428	-158.195	-158.57	-161.625	-160.663	-159.665				68.6	-162.303	-161.331	-161.842	-160.257	-163.382	-171.366	-168.796	-168.414	-167.477	-174.391	-166.695	-165.805	-161.357	-161.167	-156.419	-154.607				68.6	-159.456	-160.269	-158.542	-159.39	-157.684	-159.687	-160.551	-159.551
	68.7	-158.748	-158.923	-160.379	-159.034	-160.952	-158.271	-158.949	-160.284	-160.514	-160.924	-161.856	-157.953	-158.601	-161.95	-160.286	-159.216				68.7	-162.724	-161.167	-160.712	-160.284	-163.595	-172.32	-168.359	-169.292	-166.953	-174.158	-167.232	-165.763	-161.659	-161.753	-155.843	-155.73				68.7	-159.515	-160.593	-159.051	-159.4	-157.914	-159.087	-160.629	-159.629
	68.8	-158.425	-160.031	-160.144	-159.689	-160.757	-158.835	-158.798	-160.318	-160.194	-161.402	-162.016	-158.922	-158.188	-161.562	-159.932	-158.615				68.8	-162.848	-160.811	-159.545	-160.095	-164.233	-173.07	-168.805	-170.187	-166.989	-173.772	-168.306	-166.368	-161.014	-161.778	-155.586	-157.268				68.8	-159.46	-160.496	-159.36	-159.313	-158.212	-158.993	-160.675	-159.675
	68.9	-157.85	-160.558	-159.891	-160.221	-159.891	-159.326	-158.757	-160.406	-159.82	-162.23	-161.591	-160.375	-158.051	-160.539	-160.31	-158.669				68.9	-162.722	-160.496	-159.273	-159.611	-164.547	-173.196	-169.842	-170.291	-167.036	-173.464	-168.972	-167.221	-160.224	-161.319	-155.986	-158.107				68.9	-159.006	-160.128	-159.486	-159.367	-158.57	-159.353	-161.052	-160.052
	69	-157.412	-160.345	-159.782	-160.078	-158.723	-159.404	-158.798	-160.516	-160.014	-162.779	-160.947	-161.346	-158.605	-159.983	-161.083	-159.588				69	-162.548	-160.521	-159.974	-159.42	-164.538	-172.899	-170.828	-169.422	-166.905	-173.743	-169.211	-168.14	-160.302	-160.553	-156.947	-157.724				69	-158.648	-159.678	-159.203	-159.748	-158.981	-159.799	-161.647	-160.647
	69.1	-157.656	-159.923	-159.479	-159.295	-157.831	-159.118	-158.752	-160.332	-160.631	-162.707	-160.544	-161.463	-159.235	-160.111	-161.547	-160.587				69.1	-162.253	-160.778	-160.895	-159.69	-164.567	-172.528	-171.191	-168.323	-167.135	-174.49	-169.762	-168.81	-161.035	-159.861	-157.738	-156.632				69.1	-158.909	-159.325	-158.857	-160.1	-159.332	-159.877	-162.045	-161.045
	69.2	-158.117	-159.405	-158.784	-158.402	-157.553	-159.025	-158.583	-159.808	-161.011	-162.174	-160.43	-161.155	-159.425	-160.159	-161.715	-160.866				69.2	-161.703	-161.152	-161.37	-160.277	-164.205	-172.157	-170.951	-167.633	-167.71	-174.875	-170.719	-168.443	-161.22	-159.629	-157.807	-156.048				69.2	-159.374	-159.439	-159.062	-160.018	-159.189	-159.485	-161.886	-160.886
	69.3	-158.248	-158.892	-158.099	-158.009	-157.507	-159.21	-158.356	-159.226	-161.078	-161.584	-160.569	-160.871	-159.293	-160.003	-161.824	-160.379				69.3	-161.211	-161.279	-161.263	-161.061	-162.961	-171.548	-170.547	-167.44	-167.925	-174.59	-171.315	-167.263	-160.609	-159.817	-157.274	-156.399				69.3	-159.22	-159.874	-159.566	-159.663	-158.625	-159.039	-161.11	-160.11
	69.4	-158.17	-158.864	-158.074	-158.097	-157.28	-158.964	-158.234	-158.692	-160.967	-161.199	-161.194	-160.506	-159.053	-160.186	-161.907	-159.678				69.4	-161.346	-160.749	-160.974	-161.733	-161.773	-170.443	-170.246	-167.974	-167.603	-174.158	-171.197	-166.685	-159.901	-160.251	-156.837	-156.946				69.4	-158.449	-159.883	-159.823	-159.262	-158.346	-158.879	-160.365	-159.365
	69.5	-158.141	-159.121	-158.933	-158.158	-157.269	-158.212	-158.346	-158.101	-160.624	-161.17	-162.115	-159.963	-159.001	-160.638	-162.031	-159.371				69.5	-162.172	-160.066	-161	-161.812	-161.769	-169.289	-169.878	-169.201	-167.352	-173.868	-170.688	-167.023	-159.523	-160.89	-156.905	-157.066				69.5	-157.902	-159.337	-159.813	-158.878	-158.591	-159.149	-160.324	-159.324
	69.6	-158.456	-159.127	-160.022	-158.11	-157.946	-157.744	-158.265	-157.652	-160.353	-161.524	-162.334	-159.559	-159.255	-160.729	-162.073	-159.426				69.6	-163.093	-159.97	-161.001	-161.445	-162.83	-169.106	-169.28	-170.217	-167.594	-173.529	-170.036	-167.333	-159.595	-161.399	-157.229	-156.765				69.6	-157.994	-158.834	-159.751	-158.602	-159.095	-159.713	-160.655	-159.655
	69.7	-159.235	-158.711	-160.332	-158.313	-159.07	-157.898	-157.678	-157.889	-160.646	-161.991	-161.618	-159.545	-159.446	-160.436	-161.8	-159.271				69.7	-163.362	-160.203	-160.441	-161.266	-164.273	-170.067	-168.851	-170.331	-167.975	-173.094	-169.524	-167.189	-160.004	-161.136	-157.525	-156.302				69.7	-158.245	-158.618	-159.45	-158.56	-159.676	-160.077	-160.819	-159.819
	69.8	-159.911	-157.888	-159.756	-158.693	-159.828	-158.277	-157.056	-158.86	-161.452	-162.16	-161.037	-159.758	-159.489	-160.318	-161.538	-158.852				69.8	-162.751	-160.107	-159.722	-161.212	-165.245	-171.129	-168.995	-170.092	-167.966	-172.661	-169.507	-166.876	-160.488	-159.957	-157.774	-155.961				69.8	-158.219	-158.64	-158.779	-159.068	-160.115	-160.052	-160.88	-159.88
	69.9	-159.746	-157.157	-159.271	-158.831	-159.727	-158.426	-156.709	-159.745	-162.229	-162.064	-160.914	-160.054	-159.797	-160.598	-161.444	-158.717				69.9	-161.908	-159.91	-159.427	-161.074	-165.312	-171.528	-169.533	-170.069	-167.603	-172.333	-169.916	-166.682	-160.987	-158.756	-158.07	-155.935				69.9	-158.081	-158.887	-158.316	-160.078	-160.183	-160.032	-161.08	-160.08
	70	-158.776	-157.185	-159.546	-158.864	-159.274	-158.238	-156.54	-160.099	-162.435	-162.248	-160.745	-160.458	-160.292	-161.057	-161.157	-159.078				70	-161.423	-160.237	-159.691	-161.272	-165.01	-171.561	-170.244	-170.012	-167.405	-172.157	-170.329	-166.578	-161.248	-158.418	-158.368	-155.982				70	-157.988	-159.145	-158.524	-160.631	-159.945	-160.267	-161.32	-160.32
	70.1	-157.83	-157.962	-160.081	-158.949	-159.095	-158.02	-156.517	-160.301	-162.026	-162.944	-160.623	-160.788	-160.211	-161.365	-160.834	-159.518				70.1	-161.249	-160.744	-160.312	-161.655	-164.698	-171.749	-170.804	-169.778	-167.753	-172.153	-170.184	-166.306	-161.052	-158.831	-158.456	-156.012				70.1	-157.866	-159.197	-159.004	-160.137	-159.682	-160.454	-161.191	-160.191
	70.2	-157.524	-158.886	-160.247	-158.637	-159.073	-158.064	-156.684	-160.375	-161.501	-163.784	-160.764	-160.694	-159.28	-161.287	-160.656	-159.405				70.2	-161.277	-160.879	-160.386	-161.57	-163.946	-171.939	-170.904	-169.517	-168.482	-172.287	-169.364	-165.629	-160.937	-159.686	-158.234	-156.306				70.2	-157.983	-159.147	-159.233	-159.371	-159.534	-160.284	-160.694	-159.694
	70.3	-157.868	-159.297	-159.976	-158.021	-158.95	-158.396	-156.975	-160.006	-161.22	-164.179	-160.877	-160.001	-158.382	-160.765	-160.478	-158.621				70.3	-161.432	-160.837	-159.169	-161.049	-162.928	-171.863	-170.78	-169.283	-169.163	-172.396	-168.621	-164.991	-161.13	-160.986	-157.764	-156.631				70.3	-158.692	-159.041	-159.28	-159.197	-159.534	-159.844	-160.363	-159.363
	70.4	-158.567	-159.005	-159.442	-158.048	-158.886	-158.865	-157.166	-159.365	-161.168	-163.708	-160.962	-158.99	-158.455	-160.1	-160.463	-157.886				70.4	-161.454	-160.881	-157.419	-160.452	-162.546	-171.729	-170.657	-169.02	-169.361	-172.41	-168.434	-165.13	-161.063	-162.265	-157.165	-156.558				70.4	-159.66	-158.813	-159.38	-159.443	-159.647	-159.44	-160.336	-159.336
	70.5	-159.338	-158.492	-159.025	-158.973	-158.801	-158.946	-156.944	-158.958	-161.195	-162.517	-161.436	-158.276	-159.062	-159.598	-160.809	-157.824				70.5	-161.479	-161.029	-156.742	-159.956	-162.921	-171.56	-170.455	-168.763	-168.832	-172.547	-168.254	-165.996	-160.659	-162.68	-156.791	-156.185				70.5	-160.298	-158.835	-159.452	-159.321	-159.654	-159.296	-160.281	-159.281
	70.6	-160.147	-158.513	-159.101	-159.932	-158.401	-158.317	-156.409	-159.079	-161.231	-161.523	-162.038	-158.336	-159.024	-159.08	-161.287	-158.01				70.6	-162.012	-161.195	-157.59	-159.613	-163.7	-171.142	-170.302	-168.644	-168.099	-173.008	-167.826	-166.964	-160.314	-162.597	-156.981	-155.684				70.6	-160.377	-159.221	-159.316	-158.706	-159.4	-159.326	-160.105	-159.105
	70.7	-160.805	-159.423	-159.479	-160.094	-157.904	-157.589	-156.296	-159.49	-161.425	-161.551	-162.058	-159.134	-158.404	-158.804	-161.466	-157.874				70.7	-163.006	-161.261	-158.687	-159.39	-164.801	-170.781	-170.548	-168.736	-167.682	-173.519	-167.956	-167.769	-160.205	-162.971	-157.528	-155.05				70.7	-159.927	-159.38	-159.102	-158.444	-159.052	-159.371	-160.223	-159.223
	70.8	-160.942	-160.66	-159.681	-159.669	-157.726	-157.533	-156.691	-159.881	-161.764	-162.278	-161.568	-159.996	-158.2	-159.382	-161.251	-157.857				70.8	-163.834	-161.204	-158.923	-159.43	-165.869	-171.035	-171.167	-169.049	-167.237	-173.511	-169.136	-168.347	-160.402	-163.532	-157.78	-154.601				70.8	-159.267	-159.204	-159.024	-158.73	-158.848	-159.291	-160.829	-159.829
	70.9	-160.492	-161.419	-159.715	-159.484	-157.959	-158.011	-156.895	-159.977	-161.903	-162.908	-161.208	-160.332	-158.501	-160.3	-160.684	-158.539				70.9	-163.966	-160.977	-158.859	-159.71	-166.223	-171.622	-171.741	-169.264	-166.906	-173.273	-170.587	-168.557	-160.636	-163.44	-157.476	-154.749				70.9	-158.742	-159.142	-158.851	-158.965	-158.782	-159.108	-161.451	-160.451
	71	-159.622	-161.514	-159.62	-159.816	-158.287	-158.353	-156.966	-159.487	-161.819	-163.176	-161.115	-160.384	-158.672	-160.644	-159.917	-159.23				71	-163.643	-160.568	-159.267	-159.808	-165.851	-171.798	-171.836	-169.029	-167.303	-173.623	-171.39	-168.33	-160.673	-162.65	-156.986	-155.184				71	-158.417	-159.324	-158.428	-159.232	-158.754	-159.355	-161.552	-160.552
	71.1	-158.562	-161.006	-159.282	-160.26	-158.447	-158.151	-157.398	-158.726	-161.852	-162.953	-160.968	-160.619	-158.693	-160.546	-159.644	-159.127				71.1	-163.298	-160.34	-159.946	-159.631	-165.39	-171.49	-171.371	-168.629	-167.929	-174.191	-171.565	-168.041	-161.206	-161.806	-156.514	-155.377				71.1	-158.332	-159.529	-158.177	-159.732	-158.783	-160.173	-161.047	-160.047
	71.2	-157.773	-160.01	-158.974	-160.367	-158.718	-157.587	-157.887	-158.272	-162.035	-162	-160.831	-160.899	-158.99	-160.358	-160.267	-158.669				71.2	-162.667	-160.581	-160.575	-159.514	-165.002	-170.998	-170.756	-168.336	-168	-174.146	-171.405	-168.216	-162.583	-161.361	-155.997	-155.63				71.2	-158.422	-159.498	-158.363	-159.945	-158.845	-160.711	-160.223	-159.223
	71.3	-157.725	-159.236	-158.964	-160.179	-159.348	-157.164	-157.822	-158.465	-161.953	-160.6	-161.085	-160.875	-159.43	-160.005	-161.287	-158.43				71.3	-161.742	-161.027	-160.983	-159.816	-164.837	-170.636	-170.368	-168.067	-167.721	-173.953	-170.817	-168.502	-163.487	-161.077	-155.697	-156.605				71.3	-158.499	-159.393	-158.591	-159.496	-158.733	-160.474	-159.629	-158.629
	71.4	-158.304	-159.142	-159.062	-159.955	-160.032	-156.983	-157.164	-159.339	-161.326	-159.73	-161.469	-160.675	-159.536	-159.518	-161.919	-158.436				71.4	-161.091	-161.352	-161.175	-160.454	-165.455	-170.55	-170.384	-168.165	-167.482	-174.407	-169.911	-168.231	-162.703	-160.445	-155.645	-157.867				71.4	-158.581	-159.534	-158.464	-158.597	-158.57	-160.172	-159.721	-158.721
	71.5	-158.835	-159.134	-158.909	-159.836	-160.329	-156.983	-156.546	-160.294	-160.481	-160.068	-161.35	-160.334	-159.435	-159.201	-161.935	-158.719				71.5	-160.966	-161.326	-161.178	-160.593	-166.496	-170.472	-170.661	-168.933	-167.17	-175.137	-169.069	-167.944	-161.13	-159.576	-155.902	-158.23				71.5	-158.743	-159.735	-158.19	-157.726	-158.766	-160.329	-160.368	-159.368
	71.6	-158.901	-158.745	-158.651	-159.894	-160.116	-157.289	-156.715	-160.706	-159.971	-161.041	-160.668	-159.754	-159.593	-159.193	-161.78	-159.277				71.6	-161.42	-161.078	-160.588	-159.832	-166.855	-170.239	-170.831	-169.894	-166.807	-175.219	-168.434	-168.223	-160.229	-159.134	-156.848	-157.543				71.6	-158.932	-159.797	-158.167	-157.483	-159.21	-160.531	-161.039	-160.039
	71.7	-158.81	-158.412	-158.95	-159.928	-159.692	-157.717	-157.406	-160.61	-160.167	-161.577	-159.894	-159.277	-159.892	-159.328	-161.835	-159.869				71.7	-162.296	-161.226	-159.609	-159.189	-166.219	-170.192	-170.98	-170.417	-166.65	-174.494	-168.193	-168.256	-160.152	-159.5	-157.873	-156.479				71.7	-159.033	-159.813	-158.48	-157.977	-159.35	-160.489	-161.389	-160.389
	71.8	-159.241	-158.512	-159.776	-159.745	-159.285	-157.866	-157.789	-160.095	-160.926	-161.539	-159.394	-159.169	-159.804	-159.578	-162.007	-160.091				71.8	-162.954	-161.763	-159.145	-159.608	-165.301	-170.52	-171.169	-170.375	-166.706	-173.717	-168.409	-167.475	-160.499	-160.515	-158.001	-155.637				71.8	-158.978	-159.845	-158.889	-158.524	-159.17	-160.192	-161.397	-160.397
	71.9	-160.053	-158.84	-160.386	-159.603	-158.784	-157.784	-157.743	-159.352	-161.525	-161.606	-159.075	-159.246	-159.286	-160.089	-162.034	-159.702				71.9	-162.708	-161.818	-159.233	-160.3	-164.703	-170.83	-171.074	-170.197	-166.903	-173.491	-168.79	-166.714	-161.059	-161.248	-157.446	-155.406				71.9	-158.814	-159.859	-158.851	-158.635	-159.002	-159.793	-161.204	-160.204
	72	-160.141	-159.235	-160.54	-159.672	-158.279	-157.91	-157.572	-158.93	-161.64	-161.837	-158.934	-159.228	-158.861	-160.849	-161.896	-159.006				72	-161.818	-161.254	-159.287	-160.335	-164.37	-170.978	-170.755	-170.306	-167.069	-173.367	-169.284	-166.74	-161.435	-160.724	-156.866	-155.602				72	-158.477	-159.737	-158.196	-158.47	-158.83	-159.691	-160.999	-159.999
	72.1	-159.178	-159.776	-160.298	-159.559	-158.058	-158.2	-157.476	-158.83	-161.638	-161.795	-159.179	-159.067	-158.747	-161.548	-161.8	-158.5				72.1	-161.328	-160.874	-159.219	-160.057	-164.331	-171.202	-170.445	-170.527	-166.946	-172.685	-169.761	-167.255	-161.199	-159.433	-156.144	-155.77				72.1	-157.942	-159.695	-157.602	-158.334	-158.665	-160.024	-160.777	-159.777
	72.2	-158.279	-160.279	-159.719	-159.255	-157.961	-157.96	-157.551	-158.513	-161.586	-161.613	-159.579	-159.01	-158.555	-161.83	-161.844	-158.365				72.2	-161.425	-160.829	-159.251	-159.876	-164.74	-171.254	-170.245	-170.176	-166.59	-172.02	-169.656	-167.839	-160.639	-158.642	-155.196	-155.736				72.2	-157.623	-160.094	-157.579	-158.397	-158.713	-160.402	-160.514	-159.514
	72.3	-158.289	-160.457	-159.296	-159.498	-157.671	-157.127	-157.699	-157.91	-161.21	-161.603	-159.891	-159.295	-158.206	-161.719	-161.824	-158.542				72.3	-161.449	-160.614	-159.34	-159.698	-165.22	-170.735	-170.268	-169.183	-166.553	-172.367	-168.89	-168.504	-160.504	-158.639	-154.693	-155.798				72.3	-157.853	-160.747	-157.986	-158.504	-158.969	-160.4	-160.422	-159.422
	72.4	-158.798	-160.341	-159.416	-160.502	-157.458	-156.819	-157.894	-157.555	-160.617	-161.859	-160.312	-159.991	-158.255	-161.446	-161.52	-158.93				72.4	-161.12	-160.34	-159.491	-159.623	-165.195	-170.036	-170.161	-168.532	-167.045	-173.429	-168.207	-168.898	-160.763	-159.276	-154.876	-156.123				72.4	-158.276	-161.202	-158.587	-158.442	-159.371	-160.086	-160.586	-159.586
	72.5	-159.24	-159.925	-159.809	-161.315	-157.65	-157.608	-158.122	-157.653	-160.074	-162.43	-160.847	-160.98	-158.971	-160.924	-161.069	-159.387				72.5	-160.481	-160.505	-159.909	-159.898	-164.531	-169.89	-169.5	-168.892	-167.479	-174.313	-168.184	-168.515	-160.851	-160.614	-155.332	-156.288				72.5	-158.586	-161.294	-159.353	-158.6	-159.799	-159.763	-160.73	-159.73
	72.6	-159.524	-159.039	-160.162	-161.146	-158.036	-158.461	-158.254	-157.929	-159.737	-163.037	-161.323	-161.703	-159.896	-160.205	-160.731	-159.783				72.6	-159.686	-161.007	-160.262	-160.436	-163.939	-170.23	-168.746	-169.687	-167.695	-174.346	-168.756	-167.431	-160.894	-162.129	-155.896	-156.155				72.6	-158.823	-160.944	-160.112	-159.245	-159.742	-159.494	-160.621	-159.621
	72.7	-159.623	-158.048	-160.295	-160.436	-158.229	-158.44	-158.393	-158.4	-159.783	-163.288	-161.565	-161.723	-160.612	-159.92	-160.743	-159.911				72.7	-159.331	-161.35	-160.162	-160.919	-164.051	-170.662	-168.592	-170.104	-168.127	-173.59	-169.833	-166.199	-161.243	-162.835	-156.466	-155.901				72.7	-158.841	-160.248	-160.299	-159.686	-158.92	-159.448	-160.515	-159.515
	72.8	-159.575	-157.728	-159.827	-160.119	-158.23	-157.947	-158.613	-158.962	-159.996	-163.217	-161.333	-161.465	-160.936	-160.235	-161.235	-159.701				72.8	-159.968	-161.227	-160.122	-161.039	-164.281	-171.295	-168.84	-170.04	-168.32	-172.948	-171.16	-165.511	-161.631	-162.342	-156.477	-155.448				72.8	-158.646	-159.574	-159.637	-159.464	-158.046	-159.782	-160.761	-159.761
	72.9	-159.438	-158.33	-158.761	-160.478	-158.193	-157.795	-158.452	-158.927	-159.849	-163.098	-160.739	-161.483	-160.53	-160.575	-161.926	-159.361				72.9	-161.242	-160.867	-160.647	-160.783	-163.937	-172.112	-169.163	-169.583	-167.525	-172.938	-171.924	-165.394	-161.634	-161.328	-155.674	-155.184				72.9	-158.426	-159.106	-158.563	-159.115	-157.858	-160.122	-161.054	-160.054
	73	-159.125	-159.378	-158.08	-160.91	-157.963	-158.094	-157.682	-158.263	-159.321	-163.03	-160.414	-161.481	-159.489	-160.845	-162.457	-158.985				73	-162.276	-161.003	-161.288	-160.476	-163.439	-172.751	-169.765	-168.83	-166.138	-173.291	-171.586	-165.307	-161.377	-160.724	-154.972	-155.693				73	-158.143	-158.824	-157.792	-158.823	-158.14	-160.169	-160.875	-159.875
	73.1	-158.505	-160.046	-158.497	-160.903	-157.557	-158.55	-156.763	-157.739	-159.069	-163.137	-160.559	-160.953	-158.567	-161.366	-162.86	-158.69				73.1	-162.781	-161.739	-161.357	-160.404	-163.49	-172.829	-170.501	-168.078	-165.091	-173.395	-170.563	-165.21	-161.343	-160.541	-155.311	-156.584				73.1	-157.736	-158.72	-157.688	-158.245	-158.448	-160.125	-160.256	-159.256
	73.2	-157.799	-159.843	-159.344	-160.703	-157.271	-158.822	-156.191	-157.808	-159.662	-163.571	-160.528	-160.02	-158.381	-161.815	-163.314	-158.671				73.2	-162.979	-162.186	-160.971	-160.652	-163.973	-172.268	-170.926	-167.637	-164.888	-173.094	-169.533	-165.538	-161.578	-160.383	-156.45	-157.246				73.2	-157.449	-158.755	-158.192	-157.768	-158.644	-160.085	-159.492	-158.492
	73.3	-157.485	-159.278	-159.706	-160.493	-157.244	-158.541	-156.36	-158.454	-161.017	-163.941	-160.204	-159.279	-158.828	-161.428	-163.722	-159.076				73.3	-162.792	-161.971	-160.525	-160.916	-164.243	-171.268	-171.175	-167.805	-165.425	-172.94	-169.031	-166.466	-161.48	-160.322	-157.337	-157.67				73.3	-157.571	-159.081	-159.066	-158.136	-158.672	-159.912	-158.929	-157.929
	73.4	-157.677	-159.043	-159.583	-159.931	-157.45	-157.976	-157.242	-159.273	-162.341	-163.817	-160.226	-159.174	-159.468	-160.227	-163.711	-159.925				73.4	-162.128	-161.805	-160.062	-160.81	-163.957	-170.246	-171.426	-168.525	-166.265	-173.342	-169.331	-167.468	-160.854	-160.585	-157.285	-157.85				73.4	-157.968	-159.781	-159.877	-159.141	-158.71	-159.712	-158.9	-157.9
	73.5	-158.095	-159.188	-159.43	-158.994	-157.788	-157.745	-158.098	-159.673	-162.858	-163.328	-160.448	-159.673	-160.088	-159.27	-163.151	-160.776				73.5	-161.353	-162.195	-159.596	-160.62	-163.461	-169.96	-171.29	-169.208	-167.224	-173.943	-169.831	-167.621	-160.36	-160.964	-156.716	-157.378				73.5	-158.278	-160.276	-160.296	-159.78	-158.85	-159.736	-159.262	-158.262
	73.6	-158.373	-159.513	-159.437	-158.147	-158.189	-157.769	-158.469	-159.462	-162.716	-162.691	-160.2	-160.3	-160.356	-159.17	-162.342	-161.032				73.6	-160.906	-162.632	-159.028	-160.584	-163.33	-170.7	-170.812	-169.495	-168.088	-174.344	-169.788	-166.547	-160.408	-161.064	-156.494	-156.303				73.6	-158.223	-160.236	-160.426	-159.694	-159.001	-159.953	-159.664	-158.664
	73.7	-158.52	-159.772	-159.484	-157.853	-158.667	-157.669	-158.508	-158.994	-162.582	-162.035	-159.646	-160.522	-159.918	-159.446	-161.629	-160.623				73.7	-160.739	-162.594	-158.354	-160.506	-163.618	-171.881	-170.463	-169.182	-168.422	-174.597	-169.304	-164.897	-160.423	-161.189	-156.571	-155.706				73.7	-157.776	-159.974	-160.453	-159.353	-159.197	-160.03	-160.019	-159.019
	73.8	-158.706	-159.679	-159.55	-158.303	-158.944	-157.634	-158.322	-158.703	-162.241	-161.641	-159.492	-160.486	-159.087	-159.622	-161.072	-160.072				73.8	-160.505	-162.377	-158.082	-160.671	-164.093	-172.598	-169.914	-168.282	-168.353	-174.41	-168.593	-163.999	-160.169	-161.961	-156.151	-156.264				73.8	-157.38	-159.702	-160.338	-159.129	-159.269	-159.842	-160.416	-159.416
	73.9	-158.743	-159.24	-159.789	-159.112	-158.454	-157.872	-158.063	-158.467	-161.13	-161.723	-159.849	-160.73	-158.633	-159.837	-160.854	-159.669				73.9	-160.212	-162.421	-158.429	-161.197	-164.592	-172.196	-168.76	-167.742	-168.138	-173.668	-167.679	-164.866	-160.343	-162.873	-155.181	-157.383				73.9	-157.471	-159.656	-160.053	-159.232	-159.205	-159.648	-160.628	-159.628
	74	-158.588	-158.834	-160.173	-159.775	-157.439	-158.265	-158.042	-158.142	-159.833	-162.192	-160.302	-161.037	-158.943	-160.395	-161.312	-159.203				74	-160.147	-162.566	-158.902	-161.388	-164.678	-171.081	-167.825	-168.423	-167.632	-173.157	-167.059	-166.909	-161.096	-162.776	-154.571	-158.414				74	-158.085	-159.866	-159.627	-159.504	-159.274	-159.401	-160.596	-159.596
	74.1	-158.75	-158.705	-160.453	-159.984	-156.794	-158.663	-158.436	-158.157	-159.398	-162.749	-160.638	-160.989	-159.625	-161.079	-162.061	-158.648				74.1	-160.215	-162.423	-159.117	-161.093	-164.157	-170.275	-168.005	-169.599	-167.016	-173.365	-167.295	-168.346	-161.896	-161.6	-154.754	-159.107				74.1	-159.069	-159.846	-159.053	-159.417	-159.438	-158.998	-160.624	-159.624
	74.2	-159.387	-158.959	-160.433	-159.61	-156.846	-158.77	-158.996	-158.71	-159.802	-163.016	-160.885	-160.854	-160.08	-161.499	-162.226	-158.349				74.2	-160.191	-162.222	-159.219	-160.809	-163.729	-170.118	-168.867	-169.718	-166.76	-173.72	-168.371	-168.392	-162.302	-160.457	-155.195	-159.054				74.2	-159.884	-159.585	-158.399	-158.987	-159.546	-158.762	-160.592	-159.592
	74.3	-159.928	-159.649	-159.897	-159.021	-157.332	-158.549	-159.119	-159.465	-160.452	-162.771	-160.91	-160.932	-160.006	-161.679	-161.801	-158.415				74.3	-160.338	-162.321	-159.264	-160.723	-163.957	-170.283	-169.867	-168.675	-166.928	-173.627	-169.537	-167.806	-161.954	-159.906	-155.557	-158.26				74.3	-159.747	-159.762	-157.895	-158.971	-159.579	-158.761	-160.272	-159.272
	74.4	-159.936	-160.35	-158.892	-158.805	-157.897	-158.514	-158.701	-160.024	-161.09	-162.19	-160.585	-160.96	-159.723	-161.564	-161.552	-158.664				74.4	-160.839	-162.274	-159.035	-160.556	-164.6	-170.383	-170.966	-167.911	-167.137	-173.444	-169.925	-167.037	-161.148	-159.343	-155.915	-157.39				74.4	-158.641	-160.308	-157.566	-159.689	-159.443	-158.65	-159.931	-158.931
	74.5	-159.524	-160.428	-158.246	-159.119	-158.311	-158.604	-158.19	-160.074	-161.518	-161.778	-160.219	-160.574	-159.89	-161.056	-161.729	-159.104				74.5	-161.309	-161.559	-158.614	-160.155	-165.115	-170.266	-171.558	-168.122	-167.144	-174.016	-169.711	-165.858	-160.984	-158.591	-156.045	-156.612				74.5	-157.661	-160.378	-157.273	-160.245	-159.24	-158.518	-159.861	-158.861
	74.6	-159.104	-159.967	-158.665	-159.651	-158.441	-158.488	-157.531	-159.702	-161.707	-161.975	-160.322	-159.968	-160.588	-160.368	-162.035	-159.711				74.6	-161.775	-160.802	-158.442	-159.998	-165.204	-170.123	-171.08	-168.843	-167.015	-175.195	-169.402	-164.836	-161.818	-158.209	-155.667	-155.62				74.6	-157.666	-159.623	-157.345	-159.771	-159.388	-158.755	-159.939	-158.939
	74.7	-159.086	-159.575	-159.574	-159.96	-158.37	-158.193	-156.687	-159.117	-162.039	-162.669	-160.885	-159.926	-161.168	-159.92	-162.204	-160.03				74.7	-162.787	-161.014	-158.687	-160.5	-164.9	-170.115	-170.182	-169.61	-166.706	-175.739	-168.839	-164.8	-162.579	-157.999	-155.157	-154.606				74.7	-158.239	-158.62	-158.031	-158.882	-159.905	-159.16	-159.886	-158.886
	74.8	-159.388	-159.523	-159.958	-159.763	-158.297	-157.721	-156.416	-158.474	-162.552	-163.306	-161.357	-160.522	-161.175	-159.879	-161.923	-159.807				74.8	-164.086	-161.926	-159.052	-161.293	-164.173	-170.256	-169.882	-169.99	-166.216	-175.064	-168.17	-165.356	-162.371	-157.505	-155.128	-154.159				74.8	-158.549	-158.136	-158.798	-158.671	-160.221	-159.232	-159.776	-158.776
	74.9	-159.33	-159.662	-159.76	-159.12	-158.405	-157.322	-157.042	-158.112	-162.63	-163.54	-161.273	-160.856	-160.666	-159.852	-161.195	-159.522				74.9	-164.799	-162.502	-159.299	-161.848	-163.184	-170.545	-170.288	-169.825	-165.889	-173.909	-168.011	-165.564	-161.69	-157.559	-155.657	-154.632				74.9	-158.467	-158.389	-159.176	-159.037	-160.037	-159.074	-160.074	-159.074
	75	-158.603	-159.922	-159.589	-158.459	-158.75	-157.44	-157.79	-158.274	-161.964	-163.424	-160.76	-160.641	-159.984	-159.69	-160.37	-159.693				75	-164.634	-162.623	-159.377	-161.977	-162.78	-171.009	-170.889	-169.7	-165.961	-173.344	-168.461	-165.442	-161.382	-158.968	-156.359	-155.651				75	-158.446	-159.234	-159.307	-159.174	-159.651	-159.064	-160.665	-159.665
	75.1	-157.899	-160.291	-159.532	-158.152	-158.996	-158.089	-157.906	-158.828	-161.071	-163.109	-160.211	-160.421	-159.664	-159.829	-159.606	-160.159				75.1	-163.799	-162.797	-159.301	-161.753	-163.37	-171.8	-171.129	-170.153	-166.402	-173.502	-169.268	-165.519	-161.475	-160.775	-156.695	-156.474				75.1	-158.683	-160.105	-159.451	-158.885	-159.517	-159.127	-160.924	-159.924
	75.2	-157.878	-160.392	-159.16	-158.113	-158.747	-159.002	-157.504	-159.263	-160.58	-162.779	-159.797	-160.285	-159.796	-160.213	-159.257	-160.439				75.2	-162.675	-163.076	-159.316	-161.236	-164.36	-172.619	-170.726	-170.612	-167.028	-173.651	-170.206	-165.779	-161.464	-161.588	-156.427	-156.88				75.2	-158.767	-160.434	-159.792	-158.704	-159.63	-158.947	-160.806	-159.806
	75.3	-158.096	-159.965	-158.681	-158.046	-158.234	-159.671	-157.24	-159.325	-160.606	-162.607	-159.344	-159.864	-159.882	-160.238	-159.828	-160.528				75.3	-162.102	-163.087	-159.702	-160.614	-165.066	-172.68	-170.049	-170.196	-167.612	-173.531	-170.938	-165.967	-161.176	-161.508	-155.712	-157.086				75.3	-158.409	-160.403	-160.203	-158.943	-159.525	-158.491	-160.807	-159.807
	75.4	-157.75	-159.433	-158.712	-158.146	-157.997	-159.304	-157.339	-159.385	-160.829	-162.709	-158.888	-159.44	-159.65	-159.856	-160.986	-160.577				75.4	-162.753	-162.686	-160.139	-160.025	-165.286	-172.107	-169.568	-169.119	-168.136	-173.417	-171.118	-166.137	-160.931	-161.585	-154.932	-157.343				75.4	-157.796	-160.478	-160.416	-159.21	-159.169	-158.206	-161.092	-160.092
	75.5	-156.938	-159.353	-159.078	-158.833	-158.136	-158	-157.505	-159.637	-160.842	-162.838	-159.035	-159.637	-159.36	-159.418	-161.958	-160.543				75.5	-163.83	-162.105	-159.972	-159.697	-165.154	-171.792	-169.292	-168.148	-168.619	-173.261	-170.734	-166.216	-160.938	-162.129	-154.52	-157.767				75.5	-157.105	-160.698	-160.534	-159.183	-159.176	-158.398	-161.156	-160.156
	75.6	-156.49	-159.87	-159.053	-159.617	-158.59	-157.087	-157.734	-159.662	-160.771	-162.562	-159.952	-160.201	-159.125	-159.197	-162.298	-160.541				75.6	-163.832	-161.43	-159.16	-159.906	-164.895	-172.036	-169.247	-167.497	-169.085	-173.017	-170.437	-166.192	-161.12	-162.429	-154.656	-158.068				75.6	-156.763	-160.93	-160.596	-159.102	-159.898	-158.802	-160.623	-159.623
	75.7	-156.729	-160.431	-158.707	-159.867	-159.111	-157.135	-158.123	-159.238	-161.069	-162.106	-160.923	-160.288	-158.732	-159.517	-162.043	-160.583				75.7	-162.853	-160.836	-158.283	-160.224	-164.832	-172.655	-169.519	-167.336	-169.195	-173.039	-170.943	-166.534	-161.538	-162.19	-155.107	-157.876				75.7	-157.203	-161.054	-160.156	-159.116	-160.79	-159.139	-160.022	-159.022
	75.8	-157.226	-160.332	-158.808	-159.777	-159.059	-157.388	-158.567	-158.839	-161.673	-161.941	-161.505	-159.565	-158.26	-160.338	-161.873	-160.401				75.8	-162.285	-160.757	-157.833	-159.997	-165.077	-173.113	-170.012	-167.764	-168.286	-173.47	-171.87	-167.114	-162.21	-162.192	-155.5	-157.557				75.8	-157.936	-160.69	-159.129	-159.084	-161.116	-159.335	-159.997	-158.997
	75.9	-157.715	-159.614	-159.43	-159.567	-158.345	-157.398	-159.127	-158.826	-162.111	-161.904	-162.033	-158.594	-157.957	-161.107	-162.347	-159.897				75.9	-162.477	-161.28	-157.967	-159.458	-165.371	-172.829	-170.658	-168.23	-166.683	-174.007	-172.106	-167.033	-162.373	-162.768	-155.844	-157.841				75.9	-158.252	-159.891	-158.069	-159.131	-160.802	-159.307	-160.362	-159.362
	76	-158.391	-158.862	-159.843	-159.085	-157.757	-157.421	-159.86	-159.081	-161.964	-161.923	-162.559	-158.22	-157.88	-161.408	-162.922	-159.302				76	-162.716	-161.846	-158.481	-159.449	-165.411	-171.979	-171.107	-168.462	-165.765	-174.362	-171.365	-166.384	-161.337	-163.17	-156.296	-158.519				76	-158.143	-159.393	-157.433	-159.454	-160.285	-159.196	-160.607	-159.607
	76.1	-159.213	-158.654	-159.774	-158.597	-157.932	-157.56	-160.227	-159.436	-161.482	-162.359	-162.515	-158.647	-158.123	-161.312	-163.06	-158.908				76.1	-162.886	-161.677	-159.001	-160.054	-165.141	-171.168	-171.104	-168.679	-165.953	-174.615	-170.441	-166.092	-159.734	-162.931	-156.372	-158.685				76.1	-157.898	-159.324	-157.376	-159.759	-160.044	-159.248	-160.538	-159.538
	76.2	-159.636	-159.182	-159.62	-158.696	-158.548	-157.586	-159.653	-159.521	-161.279	-163.059	-161.685	-159.306	-158.598	-160.992	-163.121	-158.846				76.2	-163.064	-160.851	-159.256	-160.345	-164.773	-170.671	-171.023	-168.757	-166.381	-175.11	-170.131	-166.145	-158.878	-162.163	-155.885	-158.013				76.2	-157.851	-159.436	-157.825	-159.579	-160.073	-159.337	-160.241	-159.241
	76.3	-159.201	-159.964	-159.501	-159.287	-159.047	-157.432	-158.625	-159.188	-161.263	-163.433	-160.708	-159.601	-159.098	-160.37	-163.415	-159.159				76.3	-162.696	-160.425	-159.436	-159.781	-164.551	-170.477	-171.031	-168.717	-166.26	-175.652	-170.335	-165.914	-159.195	-161.077	-155.753	-157.272				76.3	-158.252	-159.797	-158.403	-159.073	-159.976	-159.243	-159.929	-158.929
	76.4	-158.155	-160.257	-159.172	-159.812	-159.459	-157.314	-158.044	-158.991	-161.101	-163.497	-160.282	-159.719	-159.717	-159.787	-163.643	-159.663				76.4	-161.531	-160.907	-159.941	-158.888	-164.577	-170.295	-170.764	-169.17	-165.907	-175.349	-170.508	-165.567	-160.115	-160.477	-156.527	-157.385				76.4	-158.831	-160.153	-158.848	-158.889	-159.783	-159.091	-159.836	-158.836
	76.5	-157.155	-160.001	-158.719	-160.008	-159.894	-157.322	-158.035	-159.3	-160.981	-163.624	-160.169	-160.313	-160.306	-160.027	-163.408	-159.894				76.5	-160.499	-161.594	-160.706	-158.445	-164.724	-169.691	-170.021	-170.292	-166.494	-174.165	-170.611	-165.589	-160.932	-160.789	-157.068	-158.104				76.5	-159.073	-160.185	-159.116	-159.273	-159.723	-159.186	-160.195	-159.195
	76.6	-156.697	-159.798	-158.773	-159.874	-160.066	-157.337	-158.165	-159.916	-161.08	-163.568	-159.682	-161.287	-160.269	-161.06	-162.806	-159.793				76.6	-160.336	-161.782	-161.301	-158.831	-164.473	-168.987	-169.05	-171.225	-168.009	-173.043	-170.788	-165.874	-161.478	-161.055	-156.295	-158.435				76.6	-158.976	-160.022	-159.129	-159.73	-159.62	-159.609	-160.875	-159.875
	76.7	-157.096	-160.075	-159.426	-159.673	-159.739	-157.417	-158.401	-160.636	-161.34	-162.955	-159.014	-161.764	-159.776	-162.082	-162.337	-159.977				76.7	-160.585	-161.577	-161.308	-159.905	-163.801	-168.935	-168.263	-171.12	-168.9	-172.352	-170.895	-166.071	-162.098	-160.358	-154.876	-157.954				76.7	-158.793	-159.761	-158.981	-159.788	-159.233	-160.107	-161.326	-160.326
	76.8	-158.28	-160.71	-159.892	-159.721	-159.214	-157.594	-158.951	-161.149	-161.744	-162.322	-158.938	-161.363	-159.573	-162.559	-162.13	-160.694				76.8	-160.757	-161.162	-160.621	-161.001	-163.537	-169.622	-167.87	-170.379	-168.598	-172.063	-170.769	-166.016	-162.915	-159.337	-154.209	-157.102				76.8	-158.701	-159.563	-159.026	-159.613	-158.797	-160.342	-161.392	-160.392
	76.9	-159.604	-161.164	-160.026	-160.049	-159.036	-157.509	-159.657	-161.137	-162.157	-162.194	-159.51	-160.576	-159.613	-162.408	-161.75	-161.28				76.9	-160.923	-160.596	-159.65	-161.46	-163.839	-170.522	-167.833	-169.846	-168.153	-172.23	-170.317	-165.947	-163.447	-159.135	-154.738	-156.844				76.9	-158.899	-159.799	-159.381	-159.399	-158.926	-160.107	-161.31	-160.31
	77	-160.348	-160.958	-160.36	-160.493	-159.279	-157.033	-160.187	-160.642	-162.213	-162.121	-160.326	-159.81	-159.684	-162	-161.228	-161.097				77	-161.017	-160.473	-158.921	-161.267	-164.088	-171.139	-168.122	-169.488	-168.373	-172.583	-169.817	-166.192	-163.235	-159.576	-155.493	-157.447				77	-159.049	-160.253	-159.565	-159.081	-159.678	-159.688	-160.93	-159.93
	77.1	-160.285	-160.132	-160.693	-160.74	-159.557	-156.623	-160.382	-159.819	-161.724	-161.73	-161.388	-159.085	-160.047	-161.68	-161.213	-160.304				77.1	-160.765	-161.034	-158.605	-160.789	-164.064	-171.533	-168.969	-168.969	-168.821	-172.848	-169.865	-166.492	-162.561	-159.92	-155.37	-157.894				77.1	-158.698	-160.261	-159.361	-158.657	-160.281	-159.541	-160.315	-159.315
	77.2	-159.821	-159.324	-160.374	-160.715	-159.896	-156.619	-160.339	-159.044	-160.974	-161.559	-162.481	-158.555	-160.682	-161.131	-161.646	-159.491				77.2	-160.244	-161.494	-158.593	-160.301	-163.971	-171.967	-170.212	-168.546	-168.899	-173.035	-170.447	-166.647	-162.215	-160.069	-154.63	-157.678				77.2	-158.28	-159.652	-159.291	-158.192	-160.09	-159.601	-160.019	-159.019
	77.3	-159.435	-159.12	-159.598	-160.655	-160.298	-156.979	-160.126	-158.694	-160.427	-161.943	-162.774	-158.467	-161.248	-160.39	-161.667	-158.968				77.3	-159.768	-161.267	-158.767	-159.929	-164.051	-172.435	-170.895	-168.736	-168.855	-173.331	-170.839	-166.878	-162.568	-160.175	-154.042	-157.735				77.3	-158.184	-159.01	-159.604	-157.923	-159.575	-159.613	-160.175	-159.175
	77.4	-159.121	-159.441	-159.035	-160.641	-160.145	-157.517	-159.522	-158.73	-160.298	-162.441	-162.009	-158.866	-161.366	-160.244	-161.102	-158.606				77.4	-159.545	-160.536	-158.982	-159.585	-164.405	-172.744	-170.52	-169.412	-169.155	-173.689	-170.619	-167.014	-163.139	-160.428	-153.589	-158.787				77.4	-158.231	-158.878	-159.83	-158.2	-159.365	-159.668	-160.628	-159.628
	77.5	-158.833	-159.72	-158.817	-160.606	-159.406	-157.883	-158.597	-158.856	-160.525	-162.907	-160.978	-159.449	-160.871	-160.638	-160.549	-158.468				77.5	-159.526	-159.863	-159.025	-159.286	-164.933	-172.645	-169.617	-170.035	-169.511	-173.658	-170.201	-166.816	-163.154	-161.006	-153.275	-159.82				77.5	-158.269	-159.188	-159.671	-158.813	-159.254	-159.875	-161.228	-160.228
	77.6	-158.615	-159.727	-158.807	-160.492	-158.974	-157.866	-157.895	-158.983	-160.934	-163.302	-160.303	-159.692	-159.88	-160.816	-160.458	-158.942				77.6	-159.82	-159.879	-158.782	-159.254	-165.218	-172.208	-168.931	-170.466	-169.445	-173.183	-170.144	-166.441	-162.375	-161.694	-153.525	-159.531				77.6	-158.04	-159.402	-159.44	-159.174	-158.991	-159.921	-161.679	-160.679
	77.7	-158.259	-159.767	-158.864	-160.128	-159.32	-157.579	-157.465	-159.129	-161.341	-163.001	-159.944	-159.534	-158.819	-160.605	-160.984	-159.855				77.7	-160.738	-160.673	-158.562	-159.586	-164.871	-171.862	-168.573	-170.57	-168.922	-172.618	-170.603	-166.14	-161.25	-162.225	-154.309	-158.346				77.7	-157.408	-159.214	-159.148	-159.294	-158.616	-159.569	-161.815	-160.815
	77.8	-157.716	-159.826	-158.838	-159.38	-160.028	-157.372	-157.185	-159.219	-161.639	-161.992	-159.84	-159.468	-158.376	-160.365	-161.75	-160.435				77.8	-161.925	-161.388	-158.953	-160.339	-164.393	-171.779	-167.988	-170.297	-167.929	-172.252	-171.216	-166.1	-160.445	-162.531	-155.155	-157.303				77.8	-156.916	-159.11	-158.58	-159.439	-158.223	-159.14	-161.602	-160.602
	77.9	-157.381	-159.537	-158.694	-158.517	-160.612	-157.472	-157.48	-158.968	-161.591	-161.496	-160.058	-159.674	-158.882	-160.536	-162.142	-160.353				77.9	-162.536	-161.25	-159.931	-161.28	-164.717	-171.873	-167.168	-169.929	-166.679	-172.251	-171.397	-166.274	-160.19	-162.466	-155.718	-156.647				77.9	-157.005	-159.396	-158.218	-159.271	-158.003	-158.992	-161.265	-160.265
	78	-157.233	-158.93	-158.59	-157.947	-160.783	-157.597	-158.375	-158.247	-161.298	-162.195	-160.416	-159.757	-159.818	-161.003	-162.014	-159.913				78	-162.4	-160.737	-160.629	-161.588	-165.483	-172.067	-167.095	-169.97	-165.941	-172.439	-171.051	-166.612	-160.342	-162.038	-156.031	-156.519				78	-157.467	-159.555	-158.496	-158.624	-158.127	-159.13	-161.165	-160.165
	78.1	-156.925	-158.57	-158.712	-157.983	-160.355	-157.541	-159.197	-157.688	-161.239	-163.059	-160.566	-159.578	-160.277	-161.042	-161.754	-159.479				78.1	-162.094	-160.94	-160.369	-160.858	-165.7	-171.971	-168.478	-170.694	-165.952	-172.615	-170.636	-167.085	-160.659	-161.637	-156.157	-157.07				78.1	-157.959	-159.394	-159.196	-158.1	-158.536	-159.53	-161.176	-160.176
	78.2	-156.892	-158.799	-158.883	-158.885	-159.715	-157.315	-159.615	-157.818	-161.251	-162.924	-160.768	-159.427	-159.953	-160.48	-161.76	-159.374				78.2	-161.916	-161.998	-159.439	-159.757	-165.497	-171.3	-170.64	-171.348	-165.913	-172.812	-170.373	-167.281	-160.521	-161.612	-155.927	-157.87				78.2	-158.262	-159.445	-159.94	-158.216	-159.003	-159.883	-160.917	-159.917
	78.3	-157.701	-159.225	-158.563	-160.197	-159.503	-157.014	-159.778	-158.29	-160.954	-162.118	-161.16	-159.487	-159.347	-159.816	-161.747	-159.687				78.3	-161.586	-162.774	-158.702	-159.171	-165.128	-170.599	-172.11	-171.112	-165.538	-172.832	-170.008	-167.017	-159.693	-161.698	-155.628	-158.328				78.3	-158.295	-159.956	-160.375	-158.749	-159.468	-159.75	-160.401	-159.401
	78.4	-158.884	-159.406	-157.756	-160.735	-159.786	-157.078	-159.886	-158.442	-160.591	-161.676	-161.046	-159.634	-158.993	-159.348	-161.244	-160.161				78.4	-161.019	-162.51	-158.719	-159.328	-164.237	-170.623	-172.363	-170.152	-165.358	-172.66	-169.397	-166.832	-159.109	-161.674	-155.612	-158.149				78.4	-158.156	-160.469	-160.332	-159.247	-159.91	-159.352	-159.863	-158.863
	78.5	-159.644	-159.391	-157.382	-160.046	-159.987	-157.56	-159.962	-158.093	-160.537	-161.871	-160.338	-159.716	-159.009	-159.103	-160.432	-160.478				78.5	-160.419	-161.826	-159.189	-159.834	-163.468	-171.059	-171.742	-169.009	-165.498	-172.608	-168.913	-167.188	-159.551	-162.009	-155.563	-157.429				78.5	-158.131	-160.596	-159.803	-159.475	-159.966	-159.187	-159.553	-158.553
	78.6	-159.947	-159.433	-158.023	-159.077	-159.698	-157.984	-159.739	-157.857	-160.76	-162.274	-159.609	-159.886	-159.35	-159.189	-160.08	-160.552				78.6	-159.947	-161.456	-159.273	-160.361	-163.936	-170.899	-170.522	-168.265	-165.893	-172.38	-168.79	-167.879	-160.683	-162.636	-155.215	-156.804				78.6	-158.377	-160.502	-158.983	-159.494	-159.443	-159.314	-159.791	-158.791
	78.7	-160.022	-159.544	-159.023	-158.809	-159.305	-158.319	-159.099	-158.21	-160.95	-162.367	-159.065	-159.98	-159.768	-159.556	-160.616	-160.501				78.7	-159.708	-161.279	-158.698	-160.706	-165.034	-170.244	-169.292	-168.234	-166.43	-171.785	-168.903	-168.018	-161.961	-162.852	-154.837	-156.585				78.7	-158.517	-160.174	-158.411	-159.551	-158.82	-159.453	-160.549	-159.549
	78.8	-159.779	-159.657	-159.543	-159.003	-159.265	-158.813	-158.338	-158.516	-160.799	-161.946	-158.852	-159.697	-159.88	-159.894	-161.182	-160.366				78.8	-159.831	-160.965	-158.161	-160.376	-165.453	-170.127	-168.859	-168.811	-166.627	-171.606	-169.215	-167.04	-162.727	-162.473	-155.103	-156.467				78.8	-158.153	-159.675	-158.462	-159.772	-158.788	-159.318	-161.225	-160.225
	78.9	-159.272	-159.871	-159.723	-158.938	-159.549	-159.347	-157.803	-158.309	-160.43	-161.746	-159.249	-159.389	-159.546	-160.108	-161.032	-160.112				78.9	-160.286	-160.518	-158.036	-159.246	-165.152	-170.55	-169.335	-169.784	-166.351	-172.43	-169.492	-165.829	-162.275	-161.638	-156.066	-156.462				78.9	-157.657	-159.572	-159.02	-160.127	-159.45	-159.079	-161.364	-160.364
	79	-158.761	-160.015	-159.935	-158.683	-159.927	-159.359	-157.78	-158.125	-160.194	-162.309	-160.214	-159.427	-158.993	-160.317	-160.815	-159.911				79	-160.76	-160.019	-157.911	-158.16	-164.901	-170.683	-170.035	-170.752	-166.083	-173.79	-169.31	-165.75	-161.162	-160.616	-156.67	-157.151				79	-157.645	-159.865	-159.559	-160.303	-160.28	-159.098	-161.254	-160.254
	79.1	-158.304	-159.703	-159.928	-158.76	-160.25	-158.661	-158.323	-158.232	-160.054	-162.897	-161.297	-159.74	-158.725	-160.441	-161.103	-159.91				79.1	-161.149	-159.709	-157.615	-158.041	-164.8	-170.749	-170.15	-171.242	-166.176	-174.703	-169.003	-166.63	-160.769	-159.985	-156.388	-158.581				79.1	-158.054	-159.89	-159.568	-159.95	-160.731	-159.338	-161.102	-160.102
	79.2	-157.956	-159.138	-159.631	-159.147	-160.557	-157.993	-159.038	-158.437	-159.9	-162.94	-162.156	-160.167	-159.054	-160.322	-161.566	-159.949				79.2	-161.735	-159.963	-157.372	-158.962	-164.492	-171.582	-169.672	-171.119	-166.554	-174.545	-169.069	-167.125	-161.348	-160.189	-155.753	-159.796				79.2	-158.45	-159.621	-159.428	-159.373	-160.436	-159.409	-160.613	-159.613
	79.3	-157.99	-158.949	-159.186	-159.31	-160.814	-157.789	-159.413	-158.737	-159.92	-162.621	-162.652	-160.563	-159.905	-160.048	-161.765	-159.961				79.3	-162.328	-160.728	-157.601	-160.305	-164.147	-172.826	-169.251	-170.723	-166.951	-173.496	-169.116	-167.021	-161.838	-161.103	-155.592	-159.997				79.3	-158.456	-159.684	-159.653	-159.171	-159.608	-159.228	-160.071	-159.071
	79.4	-158.27	-159.179	-158.67	-159.116	-160.803	-157.53	-159.152	-159.054	-160.042	-162.224	-162.527	-160.904	-160.983	-159.898	-161.655	-160.155				79.4	-162.204	-161.638	-158.608	-161.404	-164.03	-173.517	-169.183	-170.609	-167.192	-172.52	-169.14	-167.182	-161.622	-162.312	-156.303	-159.316				79.4	-158.046	-159.929	-159.749	-159.268	-159.039	-159.346	-160.007	-159.007
	79.5	-158.458	-159.428	-158.562	-158.963	-160.532	-156.974	-158.292	-159.196	-160.064	-162.13	-161.705	-160.909	-161.836	-160.084	-161.463	-160.557				79.5	-161.453	-162.397	-159.948	-161.91	-164.07	-173.501	-169.474	-170.755	-167.26	-172.541	-169.929	-167.435	-161.125	-163.381	-157.32	-158.25				79.5	-157.708	-159.708	-159.487	-159.109	-159.092	-159.856	-160.207	-159.207
	79.6	-158.554	-159.711	-159.103	-158.872	-160.289	-156.824	-157.435	-159.027	-160.225	-162.456	-160.647	-160.267	-161.957	-160.529	-161.353	-160.698				79.6	-160.957	-162.801	-160.919	-161.738	-164.106	-172.891	-170.136	-170.597	-167.31	-173.232	-171.183	-166.983	-160.913	-163.853	-157.974	-157.062				79.6	-157.802	-159.284	-159.479	-158.792	-159.349	-160.118	-160.464	-159.464
	79.7	-158.613	-160.214	-159.793	-158.532	-160.192	-157.414	-157.348	-158.595	-160.572	-162.902	-159.921	-159.31	-161.227	-160.924	-161.49	-160.346				79.7	-161.051	-162.935	-161.177	-160.976	-164.08	-171.732	-170.888	-170.211	-167.567	-173.508	-171.638	-166.346	-161.045	-163.469	-158.224	-155.799				79.7	-158.014	-159.188	-159.867	-159.004	-159.272	-160.075	-160.936	-159.936
	79.8	-158.613	-160.749	-160.258	-158.225	-160.109	-157.938	-157.937	-158.295	-160.834	-163.369	-159.85	-158.552	-160.184	-161.059	-161.888	-159.822				79.8	-161.281	-163.069	-160.571	-160.011	-164.116	-170.833	-171.29	-170.223	-168.041	-173.015	-171.267	-166.347	-161.105	-162.343	-157.982	-154.941				79.8	-157.978	-159.364	-160.163	-159.543	-158.884	-160.142	-161.365	-160.365
	79.9	-158.75	-161.009	-160.364	-158.553	-160.203	-157.888	-158.421	-158.284	-161.193	-163.814	-160.451	-158.25	-159.333	-161.055	-162.272	-159.296				79.9	-161.287	-163.171	-159.528	-159.265	-164.299	-170.879	-171.26	-170.874	-168.5	-172.373	-171.119	-166.683	-160.82	-161.153	-157.057	-155.29				79.9	-157.874	-159.616	-160.188	-159.645	-158.73	-160.4	-161.459	-160.459
	80	-159.156	-160.842	-159.81	-159.322	-160.503	-157.642	-158.528	-158.399	-161.907	-163.829	-161.358	-158.601	-158.896	-161.127	-162.473	-158.861				80	-161.345	-162.871	-158.836	-158.603	-164.364	-171.124	-170.85	-171.885	-168.784	-172.175	-171.288	-166.966	-160.342	-160.836	-155.956	-156.453				80	-157.905	-159.802	-160.287	-159.538	-158.978	-160.666	-161.344	-160.344
	80.1	-159.695	-160.295	-158.76	-159.589	-160.602	-157.588	-158.539	-158.589	-162.585	-163.25	-161.905	-159.324	-159.163	-161.18	-162.316	-158.713				80.1	-161.534	-162.269	-158.649	-157.899	-163.993	-171.124	-170.083	-172.654	-168.925	-172.384	-171.204	-167.156	-160.092	-161.487	-155.361	-157.393				80.1	-157.95	-159.74	-160.526	-160.04	-159.071	-160.537	-161.118	-160.118
	80.2	-160.091	-159.555	-158.002	-158.931	-160.318	-157.76	-158.691	-159.015	-162.706	-162.568	-161.789	-159.84	-159.92	-161.004	-161.727	-158.937				80.2	-161.618	-161.79	-158.569	-157.887	-163.447	-171.593	-169.39	-172.483	-168.96	-172.974	-170.747	-167.095	-160.419	-162.108	-155.397	-158.198				80.2	-158.004	-159.398	-160.568	-160.852	-158.767	-159.943	-160.831	-159.831
	80.3	-160.025	-158.86	-157.995	-158.092	-159.487	-157.811	-159.025	-159.827	-162.169	-162.412	-161.312	-159.944	-160.474	-160.744	-161.178	-159.462				80.3	-161.869	-161.464	-158.492	-158.784	-163.478	-172.43	-169.206	-171.176	-168.852	-173.899	-169.978	-166.936	-160.913	-161.956	-155.781	-159.032				80.3	-158.297	-159.126	-160.366	-160.938	-158.694	-159.532	-160.721	-159.721
	80.4	-159.39	-158.376	-158.55	-158.13	-158.286	-157.411	-159.23	-160.568	-161.297	-162.846	-160.857	-159.686	-160.491	-160.759	-161.068	-160.041				80.4	-162.405	-161.093	-158.781	-159.387	-164.394	-172.74	-169.444	-169.42	-168.432	-174.665	-169.068	-166.966	-160.979	-161.226	-155.97	-159.374				80.4	-158.748	-159.308	-160.188	-160.218	-159.33	-159.679	-160.874	-159.874
	80.5	-158.447	-158.2	-159.128	-159.003	-157.811	-156.994	-158.871	-160.6	-160.58	-163.22	-160.567	-159.291	-159.991	-160.932	-161.313	-160.349				80.5	-162.873	-160.829	-159.33	-159.131	-165.498	-172.47	-170.057	-168.137	-167.417	-174.88	-168.419	-167.127	-160.742	-160.482	-155.556	-159.027				80.5	-158.867	-159.887	-160.21	-159.361	-160.075	-159.817	-161.119	-160.119
	80.6	-157.722	-158.353	-159.321	-159.683	-158.604	-157.177	-158.04	-160.036	-160.23	-163.18	-160.405	-159.037	-159.319	-160.916	-161.529	-160.422				80.6	-162.923	-160.878	-159.409	-158.961	-165.982	-172.145	-170.989	-167.896	-166.111	-174.666	-168.314	-167.261	-160.548	-160.164	-154.902	-158.152				80.6	-158.554	-160.254	-160.477	-158.644	-160.255	-159.446	-161.131	-160.131
	80.7	-157.505	-158.635	-159.428	-159.559	-159.753	-157.724	-157.28	-159.375	-160.079	-163.217	-160.364	-158.998	-159.136	-160.927	-161.389	-160.583				80.7	-162.379	-161.049	-159.038	-159.382	-165.704	-172.059	-171.492	-168.648	-165.165	-174.315	-168.719	-167.208	-160.345	-160.426	-154.682	-157.119				80.7	-158.381	-159.852	-160.814	-158.132	-160.104	-158.958	-160.681	-159.681
	80.8	-157.723	-158.948	-159.928	-159.056	-160.296	-158.251	-156.928	-159.033	-159.907	-163.545	-160.545	-159.261	-159.59	-161.116	-161.116	-160.674				80.8	-161.464	-161.227	-159.185	-159.773	-165.216	-172.22	-170.893	-169.639	-164.709	-173.777	-169.492	-166.951	-160.092	-161.236	-154.961	-156.552				80.8	-158.672	-159.026	-160.933	-158.13	-159.88	-158.865	-160.294	-159.294
	80.9	-158.301	-159.431	-160.662	-158.786	-160.292	-158.828	-156.994	-159.042	-159.83	-163.581	-160.736	-160.079	-159.961	-161.147	-160.896	-160.333				80.9	-160.717	-161.351	-160.119	-159.797	-165.002	-172.518	-169.668	-170.366	-164.743	-172.853	-170.511	-166.621	-160.079	-162.131	-155.193	-156.605				80.9	-158.983	-158.646	-160.748	-158.635	-159.51	-159.161	-160.527	-159.527
	81	-159.132	-160.126	-161.165	-158.725	-160.141	-159.296	-157.203	-159.07	-160.218	-163.073	-160.571	-161.126	-159.554	-161.044	-160.513	-159.825				81	-160.63	-161.278	-160.96	-159.892	-164.91	-172.94	-168.842	-170.76	-165.211	-171.744	-171.346	-166.478	-160.453	-162.406	-154.941	-156.636				81	-158.868	-158.917	-160.341	-159.071	-159.317	-159.57	-161.018	-160.018
	81.1	-159.908	-160.663	-161.205	-158.617	-159.879	-159.285	-157.23	-159.052	-161.111	-162.52	-160.331	-161.741	-158.539	-161.251	-160.141	-159.491				81.1	-161.251	-161.207	-161.056	-160.258	-164.592	-173.378	-168.842	-170.44	-165.776	-171.017	-171.36	-166.548	-161.014	-162.011	-154.595	-156.317				81.1	-158.365	-159.185	-159.983	-159.133	-159.556	-159.846	-161.242	-160.242
	81.2	-160.099	-160.669	-160.642	-158.536	-159.575	-158.647	-157.117	-159.188	-161.903	-162.437	-160.492	-161.856	-157.913	-161.668	-160.097	-159.229				81.2	-162.023	-161.297	-160.622	-160.814	-163.932	-173.372	-169.442	-169.434	-166.24	-171.082	-170.518	-166.515	-161.395	-161.44	-154.99	-156.011				81.2	-157.758	-159.037	-159.88	-159.01	-159.91	-159.89	-161.057	-160.057
	81.3	-159.407	-160.227	-159.393	-158.682	-159.36	-157.617	-157.182	-159.44	-162.01	-162.701	-160.929	-161.617	-158.498	-161.682	-160.151	-159.227				81.3	-162.248	-161.104	-159.88	-161.509	-163.309	-172.608	-170.05	-168.72	-166.588	-171.687	-169.656	-166.4	-161.277	-160.941	-156.176	-155.953				81.3	-157.417	-158.74	-159.85	-158.74	-160.032	-159.674	-160.477	-159.477
	81.4	-158.515	-159.721	-158.035	-159.09	-159.188	-156.885	-157.513	-159.526	-161.423	-162.861	-161.356	-161.068	-159.862	-161.155	-160.102	-159.853				81.4	-161.947	-160.448	-158.753	-161.664	-163.249	-171.367	-170.275	-169.122	-166.998	-172.111	-169.586	-166.561	-160.684	-160.631	-157.181	-156.21				81.4	-157.474	-158.655	-159.667	-158.437	-159.882	-159.34	-159.776	-158.776
	81.5	-158.274	-159.529	-157.472	-159.581	-159.082	-157.032	-157.962	-159.403	-160.477	-162.828	-161.743	-160.084	-161.028	-160.454	-160.194	-160.82				81.5	-161.86	-160.002	-157.785	-160.98	-163.54	-170.361	-170.239	-170.209	-167.598	-172.123	-170.01	-167.136	-160.025	-160.572	-157.236	-156.776				81.5	-157.596	-158.872	-159.446	-158.249	-159.719	-159.099	-159.555	-158.555
	81.6	-158.39	-159.608	-157.754	-159.925	-159.176	-157.751	-158.342	-159.224	-159.584	-162.787	-162.045	-158.897	-161.566	-159.841	-160.529	-161.517				81.6	-162.166	-160.354	-157.654	-160.207	-163.644	-170.278	-170.022	-170.99	-167.903	-171.975	-169.961	-167.893	-159.686	-160.62	-156.716	-157.278				81.6	-157.679	-159.366	-159.387	-158.118	-159.727	-158.951	-160.157	-159.157
	81.7	-158.357	-159.644	-158.301	-160.111	-159.768	-158.298	-158.508	-159.181	-158.94	-162.758	-161.979	-158.337	-161.463	-159.479	-160.736	-161.652				81.7	-162.08	-161.247	-158.248	-159.871	-163.71	-170.959	-169.443	-170.88	-167.484	-171.844	-169.319	-168.442	-159.707	-160.661	-156.331	-157.341				81.7	-157.869	-159.985	-159.386	-158.292	-159.81	-158.889	-161.007	-160.007
	81.8	-158.493	-159.628	-158.822	-160.225	-160.688	-158.485	-158.486	-159.596	-158.719	-162.66	-161.303	-158.502	-160.795	-159.43	-160.841	-161.458				81.8	-161.364	-161.787	-159.067	-160.003	-164.073	-171.598	-168.576	-170.047	-166.636	-172.184	-168.842	-168.573	-159.806	-160.71	-156.318	-157.355				81.8	-157.906	-160.268	-159.146	-158.982	-159.833	-158.874	-161.314	-160.314
	81.9	-158.91	-159.717	-159.28	-160.447	-160.896	-158.449	-158.364	-160.318	-159.329	-162.646	-160.412	-158.768	-159.742	-159.783	-161.184	-161.192				81.9	-160.823	-161.258	-159.637	-160.733	-164.639	-171.882	-168.063	-169.293	-165.923	-173.212	-168.891	-168.278	-159.762	-161.047	-156.266	-157.766				81.9	-157.752	-159.963	-158.69	-159.769	-159.76	-158.603	-160.969	-159.969
	82	-159.287	-159.829	-159.642	-160.73	-160.094	-158.247	-158.3	-160.742	-160.514	-162.782	-160.196	-159.127	-158.673	-160.377	-161.433	-160.884				82	-161.033	-160.081	-159.75	-161.734	-165.259	-171.92	-168.454	-169.188	-165.729	-174.25	-169.229	-167.408	-159.676	-161.71	-155.682	-158.113				82	-157.93	-159.566	-158.288	-160.225	-159.69	-158.166	-160.572	-159.572
	82.1	-159.469	-159.657	-159.82	-160.477	-159.253	-158.117	-158.407	-160.886	-161.159	-162.824	-160.826	-159.642	-157.97	-160.579	-161.188	-160.625				82.1	-161.74	-159.523	-159.444	-162.002	-165.734	-171.733	-169.232	-169.428	-165.932	-174.661	-169.809	-166.101	-159.944	-162.219	-155.233	-157.787				82.1	-158.644	-159.661	-158.125	-160.371	-159.656	-158.167	-160.602	-159.602
	82.2	-159.333	-159.181	-159.758	-159.74	-158.877	-158.223	-158.56	-161.257	-160.816	-162.703	-161.506	-159.74	-157.587	-160.421	-160.734	-160.507				82.2	-162.55	-160.088	-158.99	-161	-165.748	-171.531	-169.564	-169.617	-166.438	-174.51	-170.665	-165.486	-160.71	-162.153	-155.757	-156.796				82.2	-159.485	-159.919	-158.092	-160.307	-159.565	-158.906	-160.886	-159.886
	82.3	-159.134	-158.769	-159.636	-159.426	-158.686	-158.394	-158.484	-161.556	-160.197	-162.54	-161.709	-159.255	-157.365	-160.534	-160.375	-160.483				82.3	-163.157	-161.131	-158.615	-159.543	-165.284	-171.57	-169.542	-169.82	-167.586	-174.077	-171.546	-166.325	-161.626	-161.904	-156.547	-155.599				82.3	-160.013	-159.688	-157.946	-160.062	-159.433	-159.972	-161.196	-160.196
	82.4	-159.28	-158.467	-159.628	-159.603	-158.664	-158.574	-157.969	-160.878	-160.141	-162.116	-161.803	-158.958	-157.453	-160.8	-160.295	-160.441				82.4	-163.402	-161.907	-158.23	-158.842	-164.596	-171.671	-169.915	-169.838	-169.206	-173.495	-172.169	-167.433	-162.056	-162.346	-156.787	-154.918				82.4	-160.091	-159.194	-157.983	-159.731	-159.434	-160.662	-161.59	-160.59
	82.5	-159.472	-157.92	-159.567	-159.493	-158.776	-158.599	-157.182	-159.325	-160.709	-161.362	-162.114	-159.294	-157.942	-160.736	-160.47	-160.308				82.5	-163.586	-162.025	-157.987	-159.041	-163.973	-171.729	-170.969	-169.347	-170.166	-172.687	-172.261	-167.493	-161.579	-163.46	-157.019	-155.079				82.5	-159.699	-158.99	-158.537	-159.41	-159.436	-160.714	-161.817	-160.817
	82.6	-159.289	-157.107	-159.351	-158.973	-158.517	-157.87	-156.745	-158.264	-161.235	-160.854	-162.337	-159.711	-158.669	-160.514	-160.589	-160.21				82.6	-163.713	-161.669	-158.358	-159.488	-163.516	-171.879	-171.923	-168.612	-169.724	-171.941	-171.637	-167.105	-160.761	-164.18	-157.614	-155.589				82.6	-159.046	-159.111	-158.984	-159.189	-159.055	-160.574	-161.402	-160.402
	82.7	-159	-156.415	-159.16	-158.532	-157.885	-156.635	-157.083	-158.593	-161.267	-160.938	-162.165	-159.536	-159.342	-160.656	-160.787	-160.372				82.7	-163.274	-161.441	-159.047	-159.921	-163.179	-171.84	-172.122	-168.329	-168.569	-171.732	-170.607	-167.32	-160.495	-163.887	-157.937	-156.044				82.7	-158.557	-159.456	-158.662	-159.173	-158.418	-160.676	-160.584	-159.584
	82.8	-158.963	-156.234	-159.13	-158.334	-157.751	-156.045	-157.752	-159.684	-161.071	-161.217	-161.735	-158.679	-159.584	-161.107	-161.369	-160.759				82.8	-162.379	-161.55	-159.196	-160.354	-162.874	-171.423	-171.916	-168.828	-167.745	-171.896	-169.962	-167.904	-160.748	-163.036	-157.836	-156.672				82.8	-158.502	-159.704	-157.956	-159.357	-158.009	-160.78	-160.026	-159.026
	82.9	-158.993	-156.845	-159.338	-158.17	-158.522	-156.376	-158.081	-160.547	-161.106	-161.357	-161.293	-157.833	-159.277	-161.273	-162.124	-160.976				82.9	-161.623	-161.79	-158.794	-160.592	-162.571	-171.199	-171.617	-169.412	-167.501	-171.997	-169.863	-168.02	-160.933	-162.386	-157.929	-157.48				82.9	-158.771	-159.598	-157.679	-159.419	-157.896	-160.472	-159.94	-158.94
	83	-158.833	-158.151	-159.724	-157.995	-159.588	-156.901	-157.934	-160.875	-161.338	-161.406	-161.17	-157.818	-158.802	-161.205	-162.304	-160.737				83	-161.015	-162.124	-158.618	-160.523	-162.557	-171.539	-171.09	-169.398	-167.511	-171.951	-169.732	-167.458	-160.99	-162.066	-158.038	-157.764				83	-158.915	-159.67	-158.234	-159.126	-157.69	-160.001	-160.216	-159.216
	83.1	-158.778	-159.257	-159.979	-157.871	-160.256	-157.184	-157.642	-160.641	-161.382	-161.508	-161.48	-158.513	-158.766	-161.341	-161.448	-160.41				83.1	-160.496	-162.635	-158.93	-160.296	-163.028	-172.251	-170.306	-169.235	-167.323	-172.039	-169.5	-166.887	-161.316	-161.969	-157.43	-157.099				83.1	-158.792	-160.155	-159.514	-158.719	-157.35	-159.911	-160.557	-159.557
	83.2	-158.996	-159.186	-159.884	-157.754	-160.261	-157.433	-157.635	-159.94	-161.081	-161.965	-161.827	-159.275	-159.351	-161.684	-160.243	-160.42				83.2	-160.315	-163.096	-159.03	-160.122	-163.804	-173.118	-169.46	-169.378	-167.092	-172.518	-169.691	-166.999	-162.019	-162.306	-156.298	-156.259				83.2	-158.777	-160.326	-160.866	-158.627	-157.318	-160.07	-160.616	-159.616
	83.3	-159.106	-158.363	-159.588	-157.699	-159.826	-157.768	-157.943	-159.091	-160.711	-162.97	-161.854	-159.799	-159.972	-162.113	-159.775	-160.53				83.3	-160.407	-163.155	-158.593	-159.902	-164.555	-173.746	-169.066	-169.706	-167.543	-173.356	-170.209	-167.467	-162.964	-162.977	-155.295	-156.128				83.3	-158.984	-159.878	-161.478	-159.007	-157.592	-159.752	-160.647	-159.647
	83.4	-159.008	-158.103	-159.344	-157.856	-159.635	-158.011	-158.113	-158.447	-160.669	-163.994	-161.388	-160.113	-160.106	-162.435	-160.184	-160.374				83.4	-160.386	-162.772	-158.324	-159.576	-165.107	-173.551	-169.544	-170.08	-168.515	-174.097	-170.264	-167.599	-163.713	-163.276	-154.738	-156.611				83.4	-158.949	-159.497	-161.096	-159.557	-157.812	-158.885	-160.939	-159.939
	83.5	-158.871	-158.571	-159.028	-158.403	-159.855	-158.085	-157.974	-158.412	-160.828	-164.192	-160.467	-160.228	-159.788	-162.418	-160.857	-160.08				83.5	-160.264	-162.003	-158.533	-159.606	-165.483	-172.551	-170.331	-170.496	-168.842	-174.047	-169.778	-167.581	-163.666	-163.062	-154.809	-157.032				83.5	-158.414	-159.523	-160.077	-159.965	-158.055	-158.415	-161.013	-160.013
	83.6	-158.644	-158.813	-158.522	-159.276	-159.916	-158.029	-158.087	-159.318	-160.646	-163.672	-159.727	-159.884	-159.352	-162.111	-161.446	-159.854				83.6	-160.41	-161.079	-158.663	-160.217	-165.488	-171.582	-170.631	-171.144	-168.39	-173.199	-169.572	-167.754	-162.949	-163.018	-155.517	-156.799				83.6	-157.728	-159.479	-159.197	-160.108	-158.744	-158.885	-160.566	-159.566
	83.7	-158.317	-158.71	-158.228	-160.053	-159.717	-158.036	-158.658	-160.548	-160.288	-163.188	-159.816	-159.081	-159.007	-161.551	-162.035	-159.663				83.7	-161.003	-160.443	-158.387	-160.9	-164.857	-171.286	-170.364	-171.913	-168.175	-172.389	-169.899	-167.808	-162.153	-163.152	-156.37	-156.169				83.7	-157.254	-159.067	-159.048	-159.893	-159.704	-159.623	-160.022	-159.022
	83.8	-158.154	-158.978	-158.469	-160.574	-159.876	-158.244	-158.86	-160.803	-160.266	-162.839	-160.337	-158.743	-158.726	-160.602	-162.573	-159.678				83.8	-161.912	-160.376	-157.842	-161.017	-163.853	-171.742	-169.957	-172.153	-168.531	-172.129	-170.368	-167.453	-161.368	-162.692	-156.611	-156.142				83.8	-157.212	-158.677	-159.156	-159.387	-160.004	-159.983	-159.771	-158.771
	83.9	-158.355	-159.616	-158.956	-161.022	-160.478	-158.217	-158.299	-159.884	-160.375	-162.276	-160.56	-159.435	-158.678	-159.569	-162.781	-160.115				83.9	-162.763	-160.718	-157.265	-160.822	-162.959	-172.587	-169.759	-171.961	-169.269	-172.291	-170.763	-167.272	-160.694	-161.662	-155.963	-156.92				83.9	-157.592	-158.802	-158.663	-158.947	-159.509	-160.08	-159.904	-158.904
	84	-158.609	-160.054	-159.365	-161.189	-160.772	-157.608	-157.83	-159.121	-160.395	-161.58	-160.772	-160.31	-158.799	-159.23	-162.524	-160.362				84	-163.164	-161.1	-157.014	-161.053	-162.563	-173.026	-169.623	-171.904	-169.952	-172.891	-170.902	-167.902	-160.547	-160.939	-155.191	-157.467				84	-158.105	-159.256	-157.665	-158.865	-159.153	-160.191	-160.482	-159.482
	84.1	-158.403	-159.986	-159.749	-160.822	-160.274	-156.969	-158.127	-159.368	-160.62	-161.21	-161.497	-160.586	-158.789	-159.718	-162.034	-159.77				84.1	-162.987	-161.538	-157.453	-161.394	-162.802	-172.633	-169.259	-171.85	-169.924	-173.842	-170.686	-168.74	-160.724	-160.83	-155.221	-157.143				84.1	-158.526	-159.374	-157.059	-159.061	-159.145	-160.283	-161.378	-160.378
	84.2	-157.776	-159.426	-160.176	-160.391	-159.334	-156.854	-158.793	-159.74	-160.955	-161.445	-162.158	-160.57	-158.858	-160.36	-161.645	-158.96				84.2	-162.574	-162.086	-158.489	-161.032	-163.252	-171.917	-168.652	-171.607	-169.212	-174.307	-170.541	-168.65	-160.466	-161.046	-155.808	-156.656				84.2	-158.526	-159.071	-157.405	-159.448	-158.913	-160.218	-162.045	-161.045
	84.3	-157.408	-158.869	-160.522	-160.319	-158.587	-156.978	-159.189	-159.197	-161.066	-162.012	-161.947	-160.734	-159.371	-160.709	-161.374	-158.737				84.3	-162.385	-162.451	-159.557	-160.272	-163.654	-171.56	-168.288	-171.385	-168.37	-173.784	-170.746	-167.732	-159.98	-161.303	-156.181	-156.738				84.3	-158.166	-158.929	-158.191	-159.737	-158.7	-160.176	-161.993	-160.993
	84.4	-157.707	-158.894	-160.758	-160.322	-158.506	-156.917	-159.048	-158.249	-161.18	-162.509	-161.071	-160.936	-160.003	-160.847	-161.09	-158.757				84.4	-162.521	-162.559	-160.422	-159.937	-164.369	-171.596	-168.63	-170.954	-167.808	-173.026	-170.906	-166.977	-160.152	-161.232	-156.226	-157.319				84.4	-158.2	-159.179	-158.744	-159.53	-159.096	-160.242	-161.41	-160.41
	84.5	-158.418	-159.225	-160.802	-160.269	-159.242	-156.865	-158.51	-157.949	-161.389	-162.746	-160.241	-160.665	-160.261	-161.044	-160.876	-158.452				84.5	-162.86	-162.676	-161.369	-160.049	-165.319	-171.572	-169.518	-170.073	-167.479	-172.764	-170.707	-166.865	-160.721	-160.804	-156.124	-157.83				84.5	-158.852	-159.499	-159.056	-158.981	-159.77	-160.075	-160.774	-159.774
	84.6	-159.047	-159.246	-160.403	-160.305	-160.175	-157.247	-157.989	-158.357	-161.559	-162.664	-159.907	-159.787	-160.296	-161.448	-160.766	-158.032				84.6	-163.085	-162.768	-162.078	-160.027	-165.718	-171.323	-170.747	-169.116	-167.145	-172.773	-170.54	-167.07	-161.019	-160.659	-155.746	-157.5				84.6	-159.545	-159.638	-159.26	-158.548	-160.231	-159.831	-160.38	-159.38
	84.7	-159.251	-159.263	-159.589	-160.084	-160.23	-157.754	-157.755	-158.944	-161.875	-162.533	-160.232	-158.859	-160.51	-161.835	-160.749	-158.027				84.7	-162.795	-162.701	-161.967	-159.723	-165.142	-170.96	-172.233	-168.273	-167.049	-172.719	-170.676	-167.112	-161.361	-161.142	-155.09	-156.552				84.7	-159.785	-159.606	-159.264	-158.437	-160.533	-159.904	-160.324	-159.324
	84.8	-159.108	-159.845	-158.723	-159.329	-159.259	-157.858	-157.962	-159.533	-162.356	-162.684	-160.962	-158.502	-160.825	-162.028	-161.014	-158.608				84.8	-161.923	-162.723	-161.191	-159.436	-163.799	-170.592	-173.208	-167.593	-167.389	-172.575	-170.511	-167.025	-161.934	-161.792	-154.646	-156.177				84.8	-159.484	-159.405	-159.1	-158.653	-160.673	-159.875	-160.586	-159.586
	84.9	-158.949	-160.735	-158.004	-158.58	-158.349	-157.926	-158.46	-160.211	-162.725	-162.833	-161.58	-158.763	-160.825	-162.103	-161.43	-159.593				84.9	-160.778	-162.839	-160.135	-159.185	-162.47	-170.652	-173.013	-167.423	-167.871	-172.277	-169.567	-166.992	-162.094	-161.83	-154.911	-156.622				84.9	-158.773	-158.93	-158.991	-158.958	-160.44	-159.363	-161.077	-160.077
	85	-158.864	-161.261	-157.516	-158.489	-158.453	-158.294	-158.64	-160.686	-162.968	-162.686	-161.853	-159.415	-160.257	-161.747	-161.671	-160.556				85	-159.969	-162.665	-159.008	-158.977	-162.089	-171.479	-171.978	-167.745	-168.234	-171.693	-168.109	-166.839	-161.747	-160.871	-155.942	-156.843				85	-158.036	-158.409	-159.055	-158.873	-159.937	-158.959	-161.379	-160.379
	85.1	-158.777	-161.038	-157.477	-158.894	-159.22	-158.377	-158.321	-160.644	-163.174	-162.456	-161.832	-160.23	-159.407	-160.749	-161.689	-160.941				85.1	-160.017	-162.014	-158.189	-159.261	-162.367	-172.533	-170.779	-168.026	-168.33	-171.107	-166.499	-166.273	-161.849	-159.241	-156.872	-156.174				85.1	-157.702	-158.276	-159.245	-158.504	-159.538	-159.204	-161.22	-160.22
	85.2	-158.659	-160.195	-157.993	-159.102	-159.781	-157.674	-158.039	-160.232	-162.936	-162.292	-161.645	-160.832	-158.888	-160.16	-161.613	-160.578				85.2	-160.788	-161.128	-158.034	-159.912	-162.316	-172.752	-169.996	-168.131	-168.052	-171.265	-165.57	-165.587	-162.808	-158.108	-156.809	-154.864				85.2	-157.831	-158.621	-159.483	-158.489	-159.371	-159.786	-160.816	-159.816
	85.3	-158.419	-159.265	-158.689	-158.939	-159.716	-156.66	-158.065	-159.866	-162.153	-162.098	-161.215	-160.871	-158.977	-160.937	-161.505	-159.856				85.3	-161.54	-160.727	-158.5	-160.172	-162.171	-171.853	-169.819	-168.501	-167.547	-172.362	-166.12	-165.569	-163.743	-158.612	-156.445	-153.667				85.3	-158.244	-159.183	-159.645	-158.932	-159.265	-160.299	-160.396	-159.396
	85.4	-158.038	-158.705	-158.96	-158.921	-159.26	-156.296	-158.157	-159.665	-161.472	-161.817	-160.533	-160.452	-159.206	-162.194	-161.323	-159.427				85.4	-161.831	-161.064	-159.223	-159.845	-162.641	-170.66	-169.844	-169.186	-167.071	-173.568	-167.413	-166.572	-163.682	-160.303	-156.522	-153.466				85.4	-158.735	-159.724	-159.581	-159.368	-158.982	-160.635	-160.143	-159.143
	85.5	-157.806	-158.575	-158.752	-159.151	-159.152	-156.842	-158.251	-159.465	-161.237	-161.579	-160.193	-160.135	-158.957	-162.627	-161.015	-159.668				85.5	-162.106	-161.487	-159.793	-159.391	-163.413	-169.942	-169.663	-169.779	-166.779	-174.156	-168.139	-168.031	-162.546	-161.599	-156.505	-154.577				85.5	-158.928	-159.98	-159.352	-159.642	-158.75	-160.804	-160.108	-159.108
	85.6	-157.831	-158.792	-158.463	-159.23	-159.424	-157.671	-158.486	-159.278	-161.258	-161.599	-160.725	-160.319	-158.312	-162.096	-160.512	-160.064				85.6	-162.537	-161.593	-159.991	-159.102	-164.167	-169.987	-169.28	-170.107	-166.728	-174.4	-168.104	-168.699	-161.187	-161.887	-156.166	-156.433				85.6	-158.489	-159.898	-159.252	-160.029	-158.914	-160.836	-160.023	-159.023
	85.7	-158.006	-159.134	-158.173	-159.168	-159.353	-158.295	-158.869	-159.176	-161.362	-161.878	-161.758	-160.681	-158.13	-161.113	-160.068	-159.902				85.7	-162.448	-161.359	-159.931	-159.222	-165.179	-170.67	-168.779	-170.184	-166.87	-174.738	-168.05	-168.046	-160.444	-161.661	-156.002	-157.965				85.7	-157.699	-159.671	-159.328	-160.502	-159.176	-160.639	-159.973	-158.973
	85.8	-158.511	-159.142	-157.732	-159.188	-158.915	-158.726	-159.162	-159.19	-161.314	-162.082	-162.533	-160.517	-158.791	-160.376	-160.245	-159.418				85.8	-161.85	-160.676	-159.702	-160.144	-166.268	-171.467	-168.365	-170.119	-167.079	-175.053	-168.538	-166.961	-160.419	-161.187	-156.091	-158.071				85.8	-157.235	-159.392	-159.422	-160.767	-159.244	-160.29	-160.271	-159.271
	85.9	-159.432	-158.566	-157.42	-159.353	-158.704	-159.064	-159.117	-159.572	-160.722	-161.811	-162.703	-159.912	-159.653	-160.304	-161.032	-159.415				85.9	-161.681	-159.8	-159.365	-161.326	-166.683	-172.05	-168.51	-170.094	-167.153	-174.922	-169.15	-166.379	-161.017	-160.671	-156.146	-156.848				85.9	-157.416	-159.186	-159.327	-160.76	-159.453	-159.915	-160.64	-159.64
	86	-160.095	-157.88	-157.808	-159.657	-158.854	-159.015	-158.963	-160.285	-159.924	-161.163	-162.405	-159.631	-160.063	-160.582	-161.595	-159.948				86	-161.945	-159.416	-159.248	-161.722	-166.275	-172.505	-169.267	-169.842	-166.803	-174.104	-169.115	-166.299	-161.679	-160.624	-156.257	-155.777				86	-158.038	-159.309	-158.946	-160.483	-159.845	-159.393	-160.621	-159.621
	86.1	-159.858	-157.732	-158.811	-159.833	-159.103	-158.323	-159.191	-160.828	-159.917	-160.665	-161.787	-159.675	-159.81	-160.713	-161.467	-160.12				86.1	-161.72	-159.957	-159.552	-161.192	-165.78	-172.779	-170.053	-169.075	-166.001	-173.016	-168.682	-166.333	-161.569	-161.191	-156.686	-155.818				86.1	-158.873	-159.737	-158.571	-160.159	-159.842	-159.009	-160.094	-159.094
	86.2	-159.022	-158.158	-159.561	-159.712	-159.392	-157.551	-159.826	-160.946	-160.986	-160.655	-160.957	-159.618	-158.999	-160.601	-161.181	-159.693				86.2	-161.175	-161.017	-159.838	-160.338	-165.629	-172.682	-170.445	-168.376	-165.253	-172.425	-168.745	-166.162	-160.756	-161.947	-157.226	-156.403				86.2	-159.603	-160.119	-158.498	-160.313	-159.294	-159.062	-159.258	-158.258
	86.3	-158.302	-158.776	-159.485	-159.651	-159.686	-157.41	-160.467	-160.742	-162.321	-161.017	-160.416	-159.659	-158.162	-160.497	-161.34	-159.525				86.3	-161.039	-161.926	-159.605	-159.738	-165.324	-172.158	-170.688	-168.316	-165.149	-172.559	-169.543	-165.743	-160.174	-162.635	-157.371	-156.404				86.3	-159.603	-160.154	-158.555	-161.063	-158.778	-159.228	-158.79	-157.79
	86.4	-158.011	-159.197	-158.932	-159.913	-159.79	-157.674	-160.567	-160.304	-162.923	-161.388	-160.516	-160.021	-157.956	-160.615	-161.731	-159.856				86.4	-161.131	-162.185	-159.174	-159.631	-164.569	-171.387	-170.999	-168.693	-165.778	-172.97	-170.342	-165.231	-160.321	-163.207	-157.129	-155.246				86.4	-158.925	-159.872	-158.531	-161.684	-158.654	-159.135	-159.141	-158.141
	86.5	-158.226	-159.526	-158.512	-160.175	-159.705	-157.693	-159.718	-159.804	-162.38	-161.544	-161.038	-160.508	-158.51	-160.982	-162.027	-159.751				86.5	-161.327	-161.388	-159.175	-159.926	-163.965	-170.801	-170.888	-168.988	-166.601	-173.277	-170.191	-164.994	-160.681	-163.038	-156.876	-153.819				86.5	-158.477	-159.749	-158.581	-161.345	-158.411	-158.847	-159.945	-158.945
	86.6	-158.893	-160.085	-158.431	-160.007	-159.56	-157.515	-158.27	-159.773	-161.107	-161.524	-161.612	-160.86	-159.377	-161.665	-162.266	-158.946				86.6	-161.988	-160.096	-159.677	-160.32	-163.905	-170.689	-170.094	-168.831	-167.064	-173.497	-168.961	-165.353	-160.759	-161.64	-156.571	-153.842				86.6	-158.63	-160.035	-158.887	-160.08	-157.728	-158.885	-160.622	-159.622
	86.7	-159.376	-160.52	-158.763	-159.587	-159.328	-157.586	-157.125	-160.377	-160.133	-161.513	-161.908	-160.79	-160.166	-162.483	-162.262	-158.469				86.7	-162.77	-159.623	-160.262	-160.563	-164.032	-170.944	-169.348	-168.405	-167.35	-173.681	-167.626	-165.984	-160.553	-159.955	-156.141	-155.411				86.7	-158.909	-160.323	-159.012	-158.845	-157.418	-159.469	-160.666	-159.666
	86.8	-159.08	-160.417	-159.533	-159.353	-159.053	-157.876	-156.787	-160.75	-160.163	-161.707	-161.875	-160.386	-160.498	-162.951	-161.704	-158.907				86.8	-162.971	-160.13	-160.446	-160.631	-164.214	-171.196	-169.406	-168.23	-167.797	-173.691	-167.4	-166.506	-160.31	-159.445	-156.139	-156.865				86.8	-158.954	-160.3	-158.582	-158.595	-158.064	-159.977	-160.095	-159.095
	86.9	-158.293	-160.185	-160.377	-159.201	-158.948	-158.007	-157.063	-160.113	-160.856	-162.243	-161.759	-160.241	-159.991	-163	-160.83	-159.574				86.9	-162.757	-160.749	-160.496	-160.44	-164.732	-170.964	-170.234	-168.414	-168.306	-173.67	-168.268	-167.125	-160.529	-160.147	-156.833	-157.177				86.9	-158.815	-159.963	-158.291	-159.318	-159.094	-159.869	-159.686	-158.686
	87	-157.666	-160.254	-160.605	-158.941	-159.313	-157.841	-157.424	-158.816	-161.406	-162.803	-161.48	-160.482	-159.184	-162.92	-160.291	-159.657				87	-162.794	-161.13	-160.988	-160.001	-165.217	-170.262	-171.152	-168.728	-168.763	-173.861	-169.019	-168.15	-161.164	-160.879	-157.785	-156.662				87	-158.648	-159.554	-158.527	-160.256	-159.841	-159.354	-159.897	-158.897
	87.1	-157.751	-160.314	-159.953	-158.716	-159.936	-157.595	-157.837	-157.896	-161.536	-162.825	-160.85	-160.59	-159.061	-162.809	-160.27	-159.061				87.1	-163.017	-161.462	-161.532	-159.852	-165.017	-169.859	-171.542	-168.944	-169.179	-174.108	-168.966	-169.288	-161.479	-161.107	-158.561	-155.998				87.1	-158.617	-159.517	-158.834	-160.835	-160.128	-158.808	-160.174	-159.174
	87.2	-158.494	-160.001	-159.083	-158.689	-160.206	-157.482	-158.608	-157.921	-161.526	-162.594	-160.363	-160.263	-159.707	-162.504	-160.239	-158.245				87.2	-162.924	-161.669	-161.439	-160.23	-164.264	-170.172	-171.324	-169.173	-169.459	-174.242	-168.778	-169.632	-161.251	-161.367	-158.87	-155.844				87.2	-158.588	-159.891	-159.116	-160.953	-160.018	-158.447	-160.001	-159.001
	87.3	-159.128	-159.347	-158.616	-158.872	-160.137	-157.561	-159.237	-158.37	-161.687	-162.757	-160.579	-159.759	-160.617	-161.972	-160.016	-157.77				87.3	-162.673	-161.514	-160.635	-160.449	-163.505	-170.929	-170.745	-169.779	-169.634	-174.125	-169.244	-168.933	-160.842	-161.861	-158.444	-156.408				87.3	-158.516	-160.26	-159.543	-160.814	-159.726	-158.583	-159.791	-158.791
	87.4	-159.174	-158.642	-158.298	-159.07	-160.046	-157.784	-159.153	-158.529	-162.043	-162.993	-161.076	-159.438	-161.393	-161.509	-160.215	-157.9				87.4	-162.796	-161.043	-159.646	-159.954	-162.853	-171.753	-170.169	-170.421	-169.445	-173.581	-170.141	-167.851	-160.472	-162.081	-157.427	-157.042				87.4	-158.679	-160.161	-159.815	-160.51	-159.53	-159.174	-159.917	-158.917
	87.5	-158.969	-158.259	-157.867	-159.121	-160.051	-157.994	-158.904	-158.494	-162.351	-162.516	-161.027	-159.563	-161.722	-161.253	-161.26	-158.416				87.5	-163.104	-160.463	-159.15	-159.326	-162.06	-172.15	-169.911	-170.259	-168.323	-173.013	-170.934	-166.896	-160.443	-161.849	-156.115	-156.701				87.5	-158.842	-159.455	-159.597	-159.879	-159.713	-159.527	-160.038	-159.038
	87.6	-158.975	-158.348	-157.658	-159.142	-160.181	-157.963	-159.026	-158.792	-162.349	-161.613	-160.475	-160.136	-161.628	-161.07	-162.43	-158.939				87.6	-162.972	-159.989	-159.131	-159.355	-161.381	-171.868	-170.303	-169.295	-166.792	-173	-171.39	-166.29	-160.923	-161.428	-154.932	-155.138				87.6	-158.655	-158.849	-159.228	-159.047	-160.18	-159.445	-160.09	-159.09
	87.7	-159.175	-158.792	-157.944	-159.185	-160.326	-157.76	-159.021	-159.688	-162.036	-161.226	-160.074	-160.595	-161.329	-160.99	-162.654	-159.317				87.7	-162.381	-159.894	-159.154	-159.901	-161.468	-171.272	-171.443	-168.358	-166.082	-173.309	-171.218	-166.559	-161.318	-161.179	-154.774	-153.545				87.7	-158.395	-159.029	-159.102	-158.596	-160.397	-159.413	-160.257	-159.257
	87.8	-159.257	-159.474	-158.642	-159.142	-160.462	-157.82	-158.528	-160.763	-161.716	-161.53	-160.038	-160.432	-160.822	-161.274	-162.024	-159.428				87.8	-161.947	-160.271	-159.118	-160.22	-162.494	-171.021	-172.574	-167.913	-166.317	-173.25	-170.399	-167.866	-160.885	-161.211	-155.913	-153.119				87.8	-158.397	-159.518	-158.997	-158.856	-160.252	-159.428	-160.323	-159.323
	87.9	-158.888	-160.088	-159.519	-159.2	-160.677	-158.151	-158.157	-161.238	-161.601	-162.039	-160.221	-159.904	-160.056	-162.001	-161.435	-159.299				87.9	-162.062	-160.857	-159.189	-159.815	-164.063	-171.575	-172.69	-167.617	-166.575	-173.149	-169.522	-169.226	-159.674	-161.114	-157.217	-153.606				87.9	-158.638	-159.603	-158.681	-159.444	-159.986	-159.372	-160.032	-159.032
	88	-158.106	-160.07	-160.189	-159.43	-160.748	-158.42	-158.346	-161.047	-161.659	-162.383	-160.552	-159.664	-159.149	-162.779	-161.379	-159.34				88	-162.298	-161.206	-159.626	-159.418	-165.266	-172.633	-171.881	-167.202	-166.468	-173.764	-168.973	-169.577	-158.659	-160.632	-157.468	-154.331				88	-158.892	-159.321	-158.478	-159.83	-159.433	-159.573	-159.556	-158.556
	88.1	-157.477	-159.323	-160.261	-159.451	-160.364	-158.676	-158.528	-160.791	-161.83	-162.353	-160.835	-159.99	-158.33	-162.983	-161.796	-159.729				88.1	-161.897	-161.069	-160.365	-160.012	-165.316	-173.417	-170.713	-167.151	-166.507	-174.719	-168.524	-168.877	-158.697	-160.262	-156.647	-155.253				88.1	-158.898	-159.168	-158.589	-159.971	-158.515	-160.098	-159.336	-158.336
	88.2	-157.359	-158.642	-159.846	-159.35	-159.653	-159.036	-158.054	-160.679	-161.978	-162.115	-161.033	-160.313	-158.132	-162.382	-162.373	-160.083				88.2	-161.207	-160.554	-160.599	-161.042	-164.531	-173.522	-169.552	-167.86	-167.08	-175.225	-168.19	-167.645	-159.456	-160.692	-155.717	-156.152				88.2	-158.638	-159.24	-158.822	-160.014	-157.722	-160.625	-159.622	-158.622
	88.3	-157.71	-158.645	-159.571	-159.552	-159.145	-159.186	-157.204	-160.418	-162.04	-162.152	-161.475	-160.346	-158.987	-161.259	-162.579	-160.044				88.3	-161.297	-160.132	-159.761	-161.292	-163.974	-173.206	-168.807	-168.81	-167.931	-174.897	-168.382	-166.271	-160.034	-161.96	-155.497	-156.606				88.3	-158.436	-159.153	-158.943	-160.08	-157.544	-160.857	-160.199	-159.199
	88.4	-158.49	-158.901	-159.63	-159.668	-159.185	-158.868	-156.767	-160.07	-161.837	-162.473	-162.024	-160.599	-160.161	-160.316	-162.052	-159.677				88.4	-162.184	-160.241	-158.772	-160.462	-164.263	-172.793	-168.563	-169.262	-168.422	-173.818	-169.146	-165.236	-160.125	-163.116	-156.002	-156.693				88.4	-158.519	-158.965	-158.854	-160.269	-158.007	-160.639	-160.707	-159.707
	88.5	-159.4	-158.791	-159.497	-159.37	-159.462	-158.254	-157.009	-160.095	-161.261	-162.599	-162.011	-161.021	-160.353	-160.141	-161.189	-159.243				88.5	-162.895	-160.949	-158.704	-159.275	-164.992	-172.003	-168.569	-169.056	-168.069	-172.791	-170.079	-165.275	-160.236	-163.065	-156.436	-156.439				88.5	-158.645	-159.087	-158.879	-160.392	-158.651	-160.248	-161.09	-160.09
	88.6	-159.836	-158.453	-159.058	-159.359	-159.315	-157.656	-157.433	-160.412	-160.751	-162.44	-161.183	-161.198	-159.488	-160.369	-160.751	-158.847				88.6	-163.186	-161.781	-159.392	-158.743	-165.31	-170.56	-168.828	-168.771	-167.391	-172.607	-170.526	-166.273	-160.926	-162.114	-156.234	-155.74				88.6	-158.637	-159.321	-159.401	-160.163	-159.002	-160.123	-161.297	-160.297
	88.7	-159.611	-158.341	-158.903	-159.865	-158.67	-157.389	-157.449	-160.413	-160.509	-162.289	-160.341	-161.11	-158.663	-160.106	-160.852	-158.676				88.7	-163.477	-162.154	-160.167	-159.134	-164.974	-169.034	-169.432	-169.303	-167.376	-173.057	-170.199	-166.932	-161.87	-161.455	-155.81	-155.16				88.7	-158.584	-159.39	-159.909	-159.747	-159.149	-160.195	-161.304	-160.304
	88.8	-159.239	-158.36	-159.162	-159.845	-158.091	-157.443	-157.126	-160.066	-160.156	-162.105	-160.344	-160.514	-158.611	-159.369	-161.072	-159.081				88.8	-163.502	-162.178	-160.591	-159.794	-164.635	-168.279	-170.09	-170.602	-167.923	-173.289	-169.716	-166.634	-162.441	-161.31	-155.717	-155.35				88.8	-158.632	-159.587	-159.632	-159.491	-159.375	-160.013	-161.452	-160.452
	88.9	-159.12	-158.279	-159.339	-158.811	-157.885	-157.53	-156.997	-159.784	-159.691	-161.642	-160.749	-159.313	-159.124	-159.04	-161.265	-159.789				88.9	-163.066	-162.176	-160.413	-159.976	-164.828	-168.472	-170.325	-171.449	-168.094	-173.132	-169.511	-165.825	-162.761	-161.319	-155.859	-155.748				88.9	-158.886	-159.965	-158.934	-159.48	-159.492	-159.589	-161.793	-160.793
	89	-159.128	-158.235	-159.164	-157.712	-158.185	-157.736	-157.323	-159.534	-159.571	-160.999	-160.784	-158.361	-159.651	-159.357	-161.614	-160.194				89	-162.68	-162.042	-159.534	-159.695	-165.11	-169.277	-170.261	-171.233	-167.841	-173.232	-169.422	-165.041	-163.099	-161.867	-155.75	-155.456				89	-159.229	-160.133	-158.693	-159.614	-159.232	-159.51	-161.78	-160.78
	89.1	-159.025	-158.188	-158.625	-157.287	-159.004	-158.193	-157.912	-159.088	-159.899	-160.617	-160.378	-158.43	-159.918	-159.773	-162.101	-160.285				89.1	-162.489	-161.865	-158.523	-159.613	-164.824	-170.256	-170.25	-170.484	-167.862	-173.608	-169.319	-164.809	-163.302	-162.974	-155.269	-154.94				89.1	-159.51	-160.005	-158.88	-159.658	-158.896	-159.612	-161.295	-160.295
	89.2	-158.692	-157.929	-157.829	-157.425	-159.745	-158.566	-158.429	-158.59	-160.463	-160.893	-159.895	-159.222	-159.947	-159.903	-162.335	-160.29				89.2	-162.478	-161.951	-157.979	-160.036	-164.039	-171.015	-170.345	-169.446	-168.559	-173.26	-168.98	-165.277	-163.24	-163.407	-155.232	-155.044				89.2	-159.638	-159.833	-158.846	-159.467	-158.745	-159.111	-160.971	-159.971
	89.3	-158.161	-157.674	-157.187	-158.124	-159.824	-158.458	-158.774	-158.337	-161.034	-161.673	-159.712	-160.084	-159.691	-159.851	-162.113	-160.079				89.3	-162.696	-162.311	-157.7	-160.668	-163.257	-171.173	-170.622	-168.083	-169.572	-172.046	-168.496	-166.056	-162.994	-162.424	-156.535	-155.454				89.3	-159.481	-160.033	-158.644	-159.34	-158.63	-158.286	-161.04	-160.04
	89.4	-157.598	-157.731	-157.119	-159.297	-159.322	-158.051	-158.9	-158.292	-161.386	-162.222	-159.815	-160.733	-159.14	-159.961	-161.736	-159.519				89.4	-162.834	-162.839	-157.428	-161.009	-162.862	-170.704	-171.094	-167.088	-169.791	-171.278	-168.425	-166.907	-162.863	-160.987	-158.369	-155.324				89.4	-159.085	-160.719	-158.672	-159.549	-158.652	-158.132	-161.042	-160.042
	89.5	-157.266	-158.1	-157.687	-160.167	-158.756	-158.008	-158.611	-158.276	-161.652	-162.298	-159.754	-161.14	-158.675	-160.457	-161.6	-158.846				89.5	-162.811	-163.318	-157.267	-160.722	-162.972	-170.13	-171.512	-167.273	-168.729	-171.864	-168.954	-167.826	-162.971	-160.332	-158.694	-154.799				89.5	-158.466	-161.324	-158.789	-160.083	-159.03	-158.791	-160.839	-159.839
	89.6	-157.299	-158.857	-158.541	-159.949	-158.642	-158.564	-158.058	-158.134	-162.099	-162.313	-159.316	-161.133	-158.721	-161.14	-161.826	-158.493				89.6	-162.828	-163.31	-157.39	-160.358	-163.436	-169.954	-171.687	-168.278	-167.455	-172.966	-169.519	-168.409	-162.787	-160.593	-157.012	-155.122				89.6	-157.58	-161.378	-158.844	-160.825	-159.545	-159.394	-160.68	-159.68
	89.7	-157.438	-159.877	-159.129	-158.907	-158.905	-159.028	-157.737	-157.799	-162.438	-162.493	-158.966	-160.69	-159.241	-161.634	-162.215	-158.805				89.7	-162.815	-162.632	-157.656	-160.438	-164.052	-170.193	-171.558	-169.062	-167.024	-173.21	-169.679	-168.302	-161.9	-161.353	-155.058	-156.451				89.7	-156.754	-161.056	-158.966	-161.287	-159.672	-159.369	-160.714	-159.714
	89.8	-157.347	-160.58	-159.069	-158.128	-159.089	-158.838	-157.77	-157.681	-162.212	-162.765	-159.124	-160.223	-159.698	-161.854	-162.371	-159.476				89.8	-162.462	-161.638	-157.561	-160.139	-164.751	-170.585	-171.12	-169.26	-167.085	-172.616	-169.722	-167.893	-160.806	-162.268	-154.602	-157.322				89.8	-156.41	-160.701	-159.279	-161.139	-159.178	-159.071	-161.03	-160.03
	89.9	-157.05	-160.742	-158.568	-158.131	-159.074	-158.467	-157.866	-158.104	-161.59	-162.761	-159.589	-160.201	-159.673	-161.854	-162.209	-159.74				89.9	-161.583	-160.898	-157.323	-158.984	-165.264	-170.98	-170.471	-169.095	-166.961	-172.398	-169.782	-167.407	-160.445	-163.105	-155.492	-157.166				89.9	-156.611	-160.394	-159.76	-160.837	-158.527	-158.911	-161.306	-160.306
	90	-156.955	-160.443	-158.32	-158.515	-158.93	-158.319	-157.973	-158.898	-161.139	-162.151	-160.034	-160.57	-159.298	-161.577	-162.039	-159.357				90	-160.766	-160.762	-157.809	-158.042	-165.125	-171.305	-169.827	-168.825	-166.783	-173.113	-169.452	-166.556	-161.081	-163.423	-155.977	-156.863				90	-157.262	-159.994	-160.151	-160.824	-158.338	-158.859	-161.059	-160.059
	90.1	-157.407	-159.662	-158.607	-158.963	-158.778	-158.35	-158.43	-159.663	-161.141	-161.323	-160.335	-160.625	-159.038	-161.144	-161.843	-158.833				90.1	-160.867	-161.06	-158.94	-157.962	-164.65	-171.592	-169.595	-168.895	-167.069	-174.112	-168.643	-165.507	-162.138	-162.835	-154.868	-156.916				90.1	-158.029	-159.48	-160.11	-160.83	-158.611	-158.966	-160.527	-159.527
	90.2	-158.107	-158.986	-159.119	-159.451	-159.003	-158.533	-159.241	-159.854	-161.47	-161.069	-160.421	-159.998	-159.26	-160.725	-161.412	-158.608				90.2	-161.569	-161.381	-159.909	-158.196	-164.663	-172.085	-169.993	-169.496	-167.868	-174.871	-168.237	-164.857	-163.056	-161.689	-153.26	-156.766				90.2	-158.281	-159.147	-159.664	-160.622	-158.926	-159.403	-160.141	-159.141
	90.3	-158.42	-159.288	-159.562	-159.863	-159.825	-158.549	-159.891	-159.498	-161.802	-161.673	-160.36	-159.122	-159.84	-160.614	-160.849	-158.743				90.3	-161.999	-161.713	-160.413	-158.337	-165.236	-172.495	-170.624	-170.093	-168.502	-175.275	-168.91	-165	-163.473	-160.748	-152.883	-155.805				90.3	-158.069	-159.264	-159.087	-160.249	-159.198	-160.056	-160.062	-159.062
	90.4	-158.281	-160.442	-159.746	-159.99	-160.558	-158.159	-159.965	-159.244	-161.748	-162.754	-160.439	-158.705	-160.283	-160.922	-160.278	-159.205				90.4	-162.252	-162.164	-160.469	-158.628	-165.673	-172.239	-171.076	-170.102	-168.337	-175.104	-169.792	-165.943	-163.035	-160.469	-153.708	-154.232				90.4	-157.981	-159.73	-158.478	-159.807	-159.374	-160.507	-160.497	-159.497
	90.5	-158.234	-161.48	-159.41	-159.841	-160.341	-157.536	-159.477	-159.198	-161.371	-163.636	-160.648	-159.036	-160.443	-161.155	-159.725	-159.883				90.5	-162.856	-162.666	-160.145	-159.03	-165.343	-171.644	-171.148	-169.788	-167.635	-174.538	-170.066	-167.173	-161.853	-160.913	-154.72	-152.977				90.5	-158.086	-160.146	-157.933	-159.577	-159.269	-160.315	-161.398	-160.398
	90.6	-158.555	-161.509	-158.612	-159.715	-159.467	-157.13	-158.835	-159.02	-161.127	-163.725	-160.749	-159.777	-160.627	-160.996	-159.531	-160.61				90.6	-163.7	-162.898	-159.912	-159.145	-164.332	-171.357	-170.85	-169.883	-167.182	-174.202	-170.144	-167.882	-160.603	-161.607	-155.551	-153.018				90.6	-158.253	-160.156	-157.735	-159.729	-159.27	-159.663	-162.063	-161.063
	90.7	-158.866	-160.683	-157.768	-159.688	-158.853	-157.235	-158.398	-158.957	-160.991	-163.072	-160.792	-160.489	-160.789	-160.763	-160.022	-161.023				90.7	-164.145	-162.549	-160.184	-159.302	-163.199	-171.322	-170.716	-170.655	-167.018	-174.238	-170.243	-167.867	-160.074	-161.878	-156.251	-154.081				90.7	-158.593	-159.914	-157.99	-160.19	-159.693	-159.262	-161.964	-160.964
	90.8	-158.804	-159.981	-157.258	-159.567	-158.843	-157.474	-158.069	-159.383	-160.726	-162.285	-160.829	-160.892	-160.484	-160.778	-160.885	-160.586				90.8	-163.668	-161.957	-160.692	-160.004	-162.692	-171.329	-171.133	-171.629	-166.675	-174.101	-170.099	-167.741	-160.79	-161.541	-156.801	-154.793				90.8	-159.026	-159.906	-158.483	-160.746	-160.059	-159.177	-161.485	-160.485
	90.9	-158.521	-159.849	-157.256	-159.396	-159.132	-157.45	-157.638	-160.093	-160.528	-161.675	-160.801	-160.884	-159.551	-160.929	-161.704	-159.42				90.9	-162.402	-161.782	-160.742	-160.972	-163.195	-171.158	-171.684	-172.077	-166.327	-173.589	-169.837	-167.817	-162.364	-160.773	-157.17	-154.664				90.9	-158.97	-160.229	-158.846	-160.939	-160.07	-159.005	-161.207	-160.207
	91	-158.346	-160.008	-157.829	-159.264	-159.256	-157.518	-157.262	-160.624	-160.713	-161.169	-160.798	-160.524	-158.421	-160.935	-162.33	-158.344				91	-161.064	-162.095	-160.279	-161.894	-164.048	-170.581	-171.976	-171.699	-166.436	-173.129	-169.51	-167.595	-163.705	-160.121	-157.485	-154.736				91	-158.289	-160.444	-158.726	-160.59	-159.942	-158.796	-161.15	-160.15
	91.1	-158.448	-159.911	-158.882	-159.151	-159.196	-157.91	-157.435	-160.677	-161.168	-160.856	-161.047	-159.971	-157.775	-160.895	-162.596	-157.989				91.1	-160.346	-162.231	-160.065	-162.706	-164.215	-170.002	-172.106	-170.915	-167.102	-173.233	-169.033	-167.166	-164.143	-160.018	-157.875	-155.756				91.1	-157.662	-160.267	-158.225	-160.295	-159.963	-158.7	-161.037	-160.037
	91.2	-158.76	-159.439	-160.033	-159.281	-159.46	-158.038	-158.097	-160.35	-161.539	-160.741	-161.548	-159.593	-158.037	-161.045	-162.391	-158.27				91.2	-160.362	-161.678	-160.507	-163.035	-163.584	-169.858	-171.826	-170.36	-168.001	-174.005	-168.513	-167.297	-163.972	-160.049	-158.048	-156.827				91.2	-157.369	-160.081	-157.837	-160.372	-160.117	-158.631	-160.781	-159.781
	91.3	-158.914	-159.23	-160.615	-159.781	-160.072	-157.52	-158.467	-159.948	-161.61	-160.738	-161.857	-159.732	-158.96	-161.122	-161.897	-158.695				91.3	-160.694	-160.839	-160.935	-162.602	-163.019	-169.928	-170.702	-170.108	-168.543	-174.67	-168.305	-167.845	-163.805	-160.05	-157.855	-157.01				91.3	-157.078	-160.407	-157.871	-160.237	-160.007	-158.491	-160.384	-159.384
	91.4	-158.739	-159.605	-160.205	-160.295	-160.544	-156.844	-158.215	-159.684	-161.213	-160.945	-161.542	-160.129	-159.811	-160.787	-161.562	-159.268				91.4	-160.919	-160.341	-160.526	-161.902	-163.14	-169.982	-169.371	-169.883	-168.6	-174.522	-168.59	-168.145	-163.539	-160.632	-157.36	-156.799				91.4	-156.907	-161.074	-158.179	-159.827	-159.619	-158.248	-159.967	-158.967
	91.5	-158.396	-160.138	-159.194	-160.24	-160.67	-156.586	-157.703	-159.556	-160.399	-161.102	-161.052	-160.339	-160.005	-160.239	-161.552	-160.184				91.5	-160.931	-160.167	-159.52	-161.468	-163.676	-170	-168.936	-169.614	-168.573	-173.743	-168.582	-168.087	-162.684	-161.812	-156.783	-156.851				91.5	-157.257	-161.374	-158.679	-159.746	-159.433	-157.914	-159.866	-158.866
	91.6	-158.012	-160.53	-158.049	-159.516	-160.349	-156.721	-157.32	-159.395	-159.836	-160.924	-161.25	-160.41	-159.534	-160.023	-161.612	-160.777				91.6	-160.914	-160.213	-159.037	-161.272	-164.406	-169.717	-169.749	-169.469	-168.647	-172.622	-167.656	-167.748	-161.239	-162.636	-156.505	-157.282				91.6	-158.055	-161.017	-159.532	-159.875	-159.526	-157.815	-160.079	-159.079
	91.7	-158.016	-160.692	-157.196	-158.966	-159.55	-156.835	-157.123	-159.245	-159.946	-160.962	-161.938	-160.434	-158.998	-160.159	-161.758	-160.475				91.7	-160.905	-160.615	-159.397	-161.16	-165.235	-168.927	-171.187	-169.566	-168.689	-171.504	-166.738	-167.402	-159.692	-162.58	-156.302	-157.961				91.7	-158.747	-160.417	-160.183	-159.75	-159.596	-158.224	-160.334	-159.334
	91.8	-158.54	-160.333	-157.35	-159.303	-158.851	-156.688	-157.094	-159.258	-160.234	-161.639	-162.187	-160.311	-158.919	-160.11	-162.083	-159.697				91.8	-160.823	-161.24	-159.845	-161.203	-165.709	-168.272	-172.046	-169.606	-168.402	-170.987	-166.982	-167.326	-158.83	-162.229	-155.818	-158.234				91.8	-158.786	-159.94	-159.738	-159.528	-159.612	-158.779	-160.689	-159.689
	91.9	-158.967	-159.386	-158.178	-159.879	-158.938	-156.371	-157.249	-159.283	-160.436	-162.44	-161.884	-159.997	-159.312	-159.804	-162.02	-159.104				91.9	-160.845	-161.629	-159.969	-161.37	-165.731	-168.593	-171.718	-169.32	-167.755	-171.248	-168.061	-167.134	-159.085	-162.132	-155.501	-157.8				91.9	-158.137	-159.439	-158.564	-159.353	-159.685	-159.076	-161.092	-160.092
	92	-158.9	-158.437	-158.391	-159.775	-159.617	-156.236	-157.56	-159.112	-160.688	-162.778	-161.551	-159.624	-159.638	-159.549	-161.191	-159.029				92	-161.27	-161.625	-159.89	-161.235	-165.664	-169.724	-170.833	-169.131	-167.159	-171.75	-168.846	-166.751	-160.076	-161.993	-155.883	-157.256				92	-157.298	-158.746	-157.906	-159.037	-159.693	-159.047	-161.072	-160.072
	92.1	-158.499	-158.202	-157.895	-159.143	-160.074	-156.668	-158.243	-158.933	-160.676	-162.742	-161.496	-159.416	-159.312	-159.277	-160.411	-159.377				92.1	-161.96	-161.652	-159.78	-160.766	-165.63	-170.779	-170.121	-169.644	-166.872	-171.876	-168.855	-166.745	-161.361	-161.57	-156.641	-157.024				92.1	-156.935	-158.17	-158.146	-158.754	-159.646	-158.836	-160.551	-159.551
	92.2	-157.998	-158.646	-157.739	-158.652	-159.944	-157.48	-159.318	-158.995	-160.329	-162.563	-161.611	-159.51	-158.627	-158.97	-160.558	-159.725				92.2	-162.238	-161.859	-159.848	-160.576	-165.449	-171.304	-169.463	-170.321	-166.636	-171.709	-168.385	-167.115	-162.705	-161.015	-156.867	-157.072				92.2	-157.222	-158.264	-158.774	-158.777	-159.681	-158.789	-159.97	-158.97
	92.3	-157.333	-158.995	-158.229	-158.469	-159.582	-157.901	-160.106	-158.944	-160.229	-162.309	-161.476	-159.823	-158.312	-159.039	-161.27	-159.855				92.3	-161.794	-161.793	-159.914	-160.837	-164.872	-171.646	-168.877	-170.007	-166.595	-171.954	-167.932	-167.415	-163.56	-160.491	-156.173	-157.127				92.3	-157.714	-158.908	-159.272	-158.945	-159.688	-159.035	-159.722	-158.722
	92.4	-156.405	-158.804	-158.77	-158.322	-159.368	-157.703	-160.052	-158.347	-160.446	-162.05	-161.02	-160.022	-158.575	-159.655	-161.748	-159.914				92.4	-161.313	-161.304	-159.665	-161.036	-163.874	-172.11	-168.905	-169.018	-167.161	-172.803	-167.912	-167.572	-163.462	-160.048	-155.346	-156.98				92.4	-158.116	-159.423	-159.614	-159.12	-159.655	-159.478	-159.92	-158.92
	92.5	-155.77	-158.426	-159.088	-158.3	-159.107	-157.487	-159.345	-157.69	-160.545	-161.775	-160.767	-160.061	-159.206	-160.418	-161.929	-159.895				92.5	-161.709	-160.902	-159.309	-160.995	-162.976	-172.568	-169.482	-168.673	-167.784	-173.323	-168.158	-167.67	-162.692	-159.726	-155.123	-156.846				92.5	-158.5	-159.615	-160.036	-159.17	-159.707	-160.146	-160.434	-159.434
	92.6	-156.112	-158.233	-159.347	-158.549	-158.497	-157.576	-158.574	-157.768	-160.721	-161.519	-160.815	-160.305	-159.948	-160.833	-162.1	-159.717				92.6	-162.745	-161.098	-159.094	-161.005	-162.981	-172.899	-170.075	-169.346	-167.751	-172.967	-168.1	-167.7	-161.542	-159.51	-154.976	-156.808				92.6	-158.731	-159.565	-160.297	-158.868	-159.984	-160.865	-160.952	-159.952
	92.7	-157.165	-158.138	-159.562	-158.71	-157.888	-157.706	-158.364	-158.378	-161.264	-161.426	-160.904	-160.599	-160.401	-160.748	-162.303	-159.419				92.7	-163.172	-161.81	-158.845	-160.966	-164.12	-172.995	-170.633	-170.351	-167.219	-172.364	-167.817	-167.29	-160	-159.542	-154.559	-156.815				92.7	-158.52	-159.223	-160.155	-158.493	-160.441	-161.209	-161.016	-160.016
	92.8	-158.058	-158.009	-159.538	-158.599	-157.947	-157.576	-158.796	-158.864	-161.606	-161.642	-161.187	-160.417	-160.478	-160.427	-162.29	-159.117				92.8	-162.48	-162.536	-158.504	-160.456	-165.671	-172.506	-171.325	-170.828	-166.572	-172.118	-167.906	-165.798	-158.635	-160.38	-154.529	-157.261				92.8	-158.022	-159.048	-159.958	-158.453	-160.604	-161.033	-160.479	-159.479
	92.9	-158.39	-157.947	-159.135	-158.304	-158.578	-157.215	-159.257	-159.28	-161.233	-162.3	-161.544	-159.87	-160.583	-160.155	-161.943	-159.092				92.9	-161.351	-162.989	-158.446	-159.697	-166.532	-171.378	-172.081	-170.327	-166.043	-172.106	-168.416	-163.921	-158.246	-161.961	-155.015	-158.123				92.9	-157.737	-159.475	-159.866	-158.653	-160.22	-160.558	-159.99	-158.99
	93	-158.492	-158.248	-158.53	-158.006	-159.152	-156.91	-159.361	-159.769	-160.512	-163.091	-161.492	-159.642	-160.771	-160.119	-161.607	-159.417				93	-160.253	-163.066	-159.006	-159.228	-166.222	-170.153	-172.563	-169.2	-165.836	-172.096	-168.766	-163.484	-159.248	-163.123	-155.592	-158.598				93	-157.867	-159.969	-159.683	-158.872	-159.689	-159.891	-159.967	-158.967
	93.1	-158.627	-158.855	-158.282	-158.04	-159.333	-156.824	-159.161	-160.123	-160.147	-163.321	-161.066	-160.133	-160.824	-160.418	-161.568	-159.848				93.1	-159.301	-162.492	-159.877	-158.762	-165.15	-169.234	-172.389	-168.413	-165.878	-172.25	-168.787	-164.605	-161.631	-163.043	-156.225	-158.269				93.1	-158.197	-159.973	-159.342	-159.004	-159.521	-159.107	-159.949	-158.949
	93.2	-158.621	-159.305	-158.662	-158.262	-158.865	-156.961	-158.631	-160.356	-160.491	-162.745	-160.498	-160.987	-160.975	-160.804	-161.53	-160.122				93.2	-159.017	-161.585	-160.223	-157.811	-164.159	-168.619	-171.502	-168.64	-165.843	-172.665	-169.018	-165.845	-164.2	-162.066	-156.908	-157.814				93.2	-158.438	-159.862	-158.864	-159.004	-159.742	-158.658	-159.57	-158.57
	93.3	-158.371	-159.338	-159.171	-158.473	-157.969	-157.354	-158.007	-160.566	-161.148	-161.701	-159.975	-161.58	-161.323	-160.924	-161.325	-159.916				93.3	-159.562	-161.228	-159.653	-157.254	-164.07	-168.517	-170.359	-169.643	-165.592	-173.06	-169.683	-166.654	-165.367	-161.076	-157.409	-158.116				93.3	-158.532	-160.208	-158.469	-158.976	-160.084	-158.85	-159.16	-158.16
	93.4	-158.077	-159.069	-159.084	-158.934	-157.573	-158.072	-157.939	-160.637	-161.37	-160.929	-159.905	-161.308	-161.377	-160.698	-161.387	-159.289				93.4	-160.246	-161.578	-158.84	-158.054	-164.886	-169.164	-169.649	-170.327	-165.4	-173.272	-170.264	-167.41	-165.037	-160.778	-157.371	-158.771				93.4	-158.58	-160.739	-158.52	-158.959	-160.254	-159.338	-159.206	-158.206
	93.5	-158.075	-158.744	-158.385	-159.46	-158.165	-158.998	-158.543	-160.485	-161.022	-161.096	-160.051	-160.176	-160.95	-160.372	-161.689	-159.031				93.5	-160.525	-162.087	-158.752	-159.337	-165.732	-169.949	-169.577	-170.062	-165.42	-173.321	-170.166	-168.341	-164.231	-161.384	-156.515	-158.745				93.5	-158.556	-160.77	-158.927	-158.933	-160.045	-159.595	-159.766	-158.766
	93.6	-158.452	-158.654	-157.661	-159.545	-159.448	-159.704	-159.021	-160.232	-160.628	-161.751	-159.729	-159.079	-160.445	-160.294	-161.722	-159.622				93.6	-160.704	-162.556	-159.292	-159.603	-166	-170.069	-169.895	-169.179	-165.62	-173.271	-169.465	-169.029	-163.733	-162.363	-155.426	-157.97				93.6	-158.379	-160.381	-159.213	-159.044	-159.718	-159.559	-160.452	-159.452
	93.7	-158.92	-158.779	-157.298	-159.283	-160.758	-159.598	-158.835	-160.069	-160.605	-161.976	-159.1	-158.726	-160.113	-160.471	-161.468	-160.33				93.7	-161.342	-162.872	-159.528	-158.781	-165.777	-169.778	-170.352	-168.367	-166.135	-173.304	-168.662	-168.968	-163.421	-162.814	-155.188	-156.866				93.7	-158.117	-160.123	-159.226	-159.102	-159.623	-159.382	-160.906	-159.906
	93.8	-159.399	-158.909	-157.394	-159.101	-161.372	-158.321	-158.447	-160.047	-160.868	-161.985	-158.822	-159.013	-159.839	-160.465	-161.259	-160.234				93.8	-162.287	-162.678	-159.266	-158.102	-165.429	-170.072	-170.594	-168.359	-166.714	-173.552	-168.134	-168.519	-162.922	-162.457	-155.677	-155.864				93.8	-157.877	-160.063	-159.121	-158.911	-159.507	-159.089	-161.048	-160.048
	93.9	-159.927	-159.196	-157.98	-159.128	-161.05	-156.383	-158.261	-160.253	-161.232	-162.28	-159.004	-159.327	-159.458	-160.014	-161.258	-159.472				93.9	-162.906	-161.906	-159.219	-158.415	-165.169	-171.328	-170.317	-169.136	-166.854	-173.79	-168.194	-168.367	-162.469	-161.848	-156.018	-155.431				93.9	-157.659	-159.917	-158.942	-158.889	-159.091	-158.872	-160.92	-159.92
	94	-160.197	-159.646	-158.804	-159.189	-160.367	-155.096	-158.069	-160.816	-161.868	-162.431	-159.405	-159.225	-158.991	-159.611	-161.364	-158.709				94	-163.018	-161.064	-159.458	-159.131	-164.925	-172.675	-169.68	-169.912	-166.899	-173.476	-168.723	-168.464	-162.236	-161.633	-156.017	-155.633				94	-157.574	-159.402	-158.587	-159.131	-158.786	-158.962	-160.679	-159.679
	94.1	-159.716	-159.881	-159.425	-159.189	-160.207	-155.276	-157.825	-161.253	-162.586	-162.088	-160.187	-159.042	-158.576	-159.805	-161.376	-158.184				94.1	-162.924	-160.93	-159.479	-159.397	-164.734	-173.06	-169.267	-170.351	-167.52	-172.662	-168.984	-168.197	-161.888	-161.633	-156.022	-156.081				94.1	-157.661	-158.649	-158.2	-159.125	-158.862	-159.214	-160.559	-159.559
	94.2	-158.715	-159.741	-159.659	-159.071	-160.664	-156.323	-157.733	-160.885	-162.599	-161.796	-161.332	-159.293	-158.262	-160.287	-161.399	-158.152				94.2	-162.596	-161.69	-159.481	-159.309	-164.895	-172.506	-169.542	-170.545	-168.493	-172.153	-168.726	-167.097	-161.388	-161.361	-156.241	-156.465				94.2	-157.579	-158.269	-158.228	-158.926	-158.868	-159.311	-160.483	-159.483
	94.3	-158.283	-159.442	-159.54	-158.904	-161.057	-157.138	-157.806	-159.985	-161.942	-162.012	-162.239	-159.827	-158.277	-160.63	-161.553	-158.78				94.3	-161.78	-162.555	-159.722	-159.183	-165.472	-171.844	-170.474	-170.248	-169.072	-172.239	-168.341	-165.49	-161.085	-161.02	-156.419	-156.626				94.3	-157.08	-158.523	-158.721	-159.119	-158.555	-159.052	-160.254	-159.254
	94.4	-158.578	-159.267	-159.274	-159.048	-160.99	-157.449	-157.894	-159.431	-161.463	-162.428	-162.505	-160.157	-158.954	-160.722	-161.519	-159.55				94.4	-161.025	-162.911	-159.63	-158.927	-166.232	-171.441	-171.488	-169.363	-169.171	-172.287	-168.177	-164.483	-161.229	-161.158	-156.15	-156.436				94.4	-156.389	-159.074	-159.234	-159.473	-158.172	-158.535	-160.224	-159.224
	94.5	-158.419	-159.334	-159.323	-159.47	-160.538	-157.724	-157.91	-159.388	-161.332	-162.689	-162.142	-160.306	-159.962	-160.583	-161.26	-159.874				94.5	-161.025	-163.292	-159.104	-158.535	-166.639	-170.985	-171.872	-168.63	-169.206	-171.889	-168.501	-164.905	-161.646	-161.949	-155.338	-156.233				94.5	-156.146	-159.592	-159.475	-159.224	-157.794	-158.261	-160.568	-159.568
	94.6	-157.522	-159.486	-159.798	-159.452	-159.98	-158.209	-157.888	-159.161	-161.219	-162.8	-161.552	-160.55	-160.471	-160.602	-161.225	-159.725				94.6	-161.261	-163.936	-158.824	-158.394	-166.149	-170.474	-171.443	-168.713	-169.186	-171.286	-169.189	-166.202	-161.954	-162.831	-154.325	-156.525				94.6	-156.728	-159.849	-159.497	-158.496	-157.488	-158.667	-160.668	-159.668
	94.7	-156.974	-159.656	-160.085	-158.78	-159.741	-158.598	-157.96	-158.444	-161.17	-162.763	-161.336	-160.6	-160.259	-160.862	-161.547	-159.463				94.7	-161.112	-163.983	-158.849	-158.775	-165.31	-170.338	-170.672	-169.207	-168.716	-170.759	-169.821	-166.966	-162.308	-162.76	-153.64	-157.208				94.7	-157.704	-159.683	-159.528	-158.035	-157.471	-159.308	-160.241	-159.241
	94.8	-157.131	-159.919	-159.659	-158.298	-160.003	-158.598	-158.138	-157.792	-161.371	-162.481	-161.632	-160.184	-159.799	-160.942	-162.06	-159.533				94.8	-161.098	-163.16	-158.998	-159.429	-165.224	-170.745	-170.213	-169.138	-167.803	-170.458	-170.31	-166.722	-162.777	-161.554	-153.571	-157.777				94.8	-158.483	-159.244	-159.586	-158.169	-157.909	-159.286	-159.722	-158.722
	94.9	-157.231	-160.088	-158.774	-158.632	-160.408	-158.234	-158.248	-157.879	-161.595	-162.006	-162.051	-159.66	-159.423	-160.817	-162.463	-160.088				94.9	-161.594	-162.233	-159.117	-159.888	-165.941	-171.401	-170.365	-168.461	-167.163	-170.83	-170.784	-166.396	-162.636	-160.479	-154.197	-157.889				94.9	-158.899	-158.979	-159.564	-158.638	-158.828	-158.748	-159.363	-158.363
	95	-157.102	-159.798	-158.121	-159.262	-160.429	-157.676	-158.286	-158.882	-161.375	-161.692	-162.217	-159.507	-159.283	-160.75	-162.35	-160.776				95	-162.057	-161.852	-158.784	-159.875	-166.705	-171.952	-170.891	-168.411	-167.105	-172.086	-171.254	-167.11	-161.635	-160.657	-155.29	-157.607				95	-158.884	-159.176	-159.509	-159.079	-159.871	-158.64	-159.132	-158.132
	95.1	-157.36	-159.175	-158.043	-159.636	-159.94	-157.137	-158.323	-160.248	-160.712	-161.794	-162.073	-159.745	-159.495	-160.842	-161.855	-161.169				95.1	-162.032	-161.942	-158.209	-159.6	-166.783	-172.262	-171.127	-169.452	-166.851	-173.434	-171.632	-168.668	-160.764	-161.532	-155.946	-157.209				95.1	-158.511	-159.586	-159.627	-159.263	-160.44	-159.152	-159.256	-158.256
	95.2	-158.135	-158.763	-158.273	-159.994	-159.145	-156.948	-158.252	-161.08	-160.094	-161.895	-161.707	-159.836	-159.879	-160.863	-161.724	-160.984				95.2	-161.919	-162.167	-158.069	-159.479	-166.006	-172.316	-170.658	-170.462	-166.226	-174.136	-171.686	-169.679	-160.736	-161.883	-155.692	-156.895				95.2	-158.042	-159.726	-160.117	-159.129	-160.411	-159.575	-159.983	-158.983
	95.3	-158.85	-158.75	-158.295	-160.322	-158.329	-157.354	-158.134	-161.004	-159.897	-161.655	-161.149	-159.609	-159.998	-160.513	-162.067	-160.37				95.3	-162.33	-162.191	-158.751	-159.442	-165.051	-172.202	-170.06	-170.585	-166.057	-174.384	-171.325	-169.57	-161.379	-161.55	-155.148	-156.872				95.3	-157.645	-159.446	-160.698	-158.914	-160.231	-159.543	-160.975	-159.975
	95.4	-159.124	-158.817	-158.101	-160.284	-157.815	-158.133	-158.025	-160.376	-160.154	-161.694	-160.726	-159.617	-159.852	-160.085	-162.149	-159.916				95.4	-163.129	-161.947	-160.182	-159.221	-164.638	-171.948	-170.228	-170.254	-166.461	-174.397	-170.773	-168.937	-162.544	-161.027	-154.94	-157.15				95.4	-157.414	-159.162	-160.682	-158.889	-160.127	-159.356	-161.569	-160.569
	95.5	-159.071	-158.625	-158.257	-159.926	-157.862	-158.777	-157.923	-159.891	-160.713	-162.363	-160.953	-160.104	-159.987	-159.985	-161.72	-159.82				95.5	-163.775	-161.566	-161.496	-158.988	-164.809	-171.453	-170.903	-170.126	-166.987	-174.033	-169.969	-168.11	-163.458	-160.537	-155.117	-157.283				95.5	-157.546	-159.256	-159.858	-159.018	-159.913	-159.303	-161.452	-160.452
	95.6	-158.801	-158.3	-158.975	-159.499	-158.535	-158.809	-157.874	-159.856	-161.276	-162.901	-161.82	-160.686	-160.577	-160.039	-161.115	-159.915				95.6	-163.956	-160.849	-161.697	-159.029	-165.034	-171.07	-171.019	-170.288	-167.303	-173.605	-168.86	-167.315	-162.806	-160.074	-155.497	-156.85				95.6	-158.058	-159.376	-158.881	-159.156	-159.629	-159.231	-161.019	-160.019
	95.7	-158.492	-158.375	-159.694	-159.162	-159.305	-158.208	-157.878	-159.829	-161.303	-162.756	-162.699	-160.889	-161.145	-159.887	-160.584	-160.034				95.7	-163.478	-160.024	-160.872	-159.454	-164.919	-171.35	-170.497	-170.557	-167.218	-173.716	-168.045	-166.919	-160.989	-159.593	-155.908	-156.053				95.7	-158.438	-158.991	-158.364	-159.06	-159.607	-158.957	-160.951	-159.951
	95.8	-158.486	-158.835	-159.758	-158.766	-159.292	-157.5	-157.84	-159.559	-160.474	-162.476	-162.919	-160.599	-161.198	-159.695	-160.397	-159.911				95.8	-162.539	-160.277	-159.793	-160.175	-164.546	-172.022	-170	-170.681	-167.014	-174.507	-168.017	-166.791	-159.6	-159.108	-156.28	-155.387				95.8	-158.379	-158.452	-158.438	-158.572	-159.93	-158.738	-161.274	-160.274
	95.9	-158.818	-158.907	-159.108	-158.155	-158.755	-156.884	-157.696	-159.476	-159.369	-162.671	-162.279	-160.202	-160.83	-159.969	-160.595	-159.623				95.9	-161.912	-161.788	-158.82	-160.724	-164.129	-172.343	-169.669	-170.459	-167.071	-175.61	-168.586	-166.667	-159.085	-159.084	-156.321	-155.26				95.9	-158.224	-158.599	-159.082	-158.047	-160.305	-158.586	-161.491	-160.491
	96	-158.996	-158.34	-158.323	-157.716	-158.71	-156.494	-157.631	-159.778	-158.986	-163.107	-161.247	-159.921	-160.339	-160.356	-160.773	-159.687				96	-162.053	-162.926	-157.981	-160.637	-163.788	-172.086	-169.32	-169.986	-167.269	-176.064	-169.375	-166.706	-159.032	-159.986	-155.682	-155.694				96	-158.231	-159.327	-159.916	-157.917	-160.455	-158.287	-161.434	-160.434
	96.1	-158.823	-157.824	-158.229	-157.867	-159.105	-156.859	-157.7	-159.869	-159.588	-163.369	-160.409	-159.576	-159.654	-159.987	-160.763	-160.368				96.1	-162.468	-162.661	-157.268	-160.085	-163.788	-171.619	-169.047	-169.394	-167.303	-175.36	-170.132	-166.887	-159.371	-161.305	-154.709	-156.35				96.1	-158.412	-159.667	-160.232	-158.146	-160.298	-158.157	-161.24	-160.24
	96.2	-158.637	-157.962	-158.994	-158.36	-159.453	-157.589	-157.72	-159.265	-160.544	-163.386	-159.826	-159.207	-158.902	-159.033	-160.607	-161.101				96.2	-162.406	-161.843	-156.912	-159.471	-164.257	-171.224	-169.096	-168.739	-167.163	-174.242	-170.734	-166.835	-160.111	-162.357	-154.065	-156.979				96.2	-158.689	-159.235	-159.831	-158.42	-160.009	-158.441	-160.988	-159.988
	96.3	-158.62	-158.545	-159.79	-158.785	-159.828	-157.399	-157.796	-158.342	-160.975	-163.39	-159.494	-158.9	-158.572	-158.593	-160.26	-161.18				96.3	-162.043	-161.35	-157.284	-158.998	-164.757	-171.066	-169.442	-168.25	-167.174	-173.503	-171.011	-166.634	-160.658	-163.152	-153.799	-157.376				96.3	-158.979	-158.747	-159.191	-158.677	-159.817	-158.832	-160.669	-159.669
	96.4	-158.546	-158.921	-159.965	-158.86	-160.196	-156.205	-158.134	-157.648	-160.396	-163.51	-159.774	-158.664	-158.802	-159.202	-159.777	-160.762				96.4	-162.179	-161.055	-158.205	-158.941	-164.821	-171.444	-169.84	-168.154	-167.437	-173.239	-170.857	-166.501	-160.365	-163.834	-153.973	-157.507				96.4	-159.073	-158.894	-158.691	-159.033	-159.617	-159.098	-160.432	-159.432
	96.5	-158.271	-158.721	-159.801	-158.502	-160.366	-155.443	-158.536	-157.353	-159.139	-163.437	-160.582	-158.816	-159.523	-160.271	-159.424	-160.341				96.5	-163.06	-160.823	-158.989	-159.479	-164.635	-172.028	-170.125	-168.541	-167.553	-173.328	-170.606	-166.092	-159.696	-163.849	-155.071	-157.78				96.5	-158.561	-159.476	-158.388	-159.219	-159.294	-159.3	-160.382	-159.382
	96.6	-158.017	-158.359	-159.87	-158.039	-160.508	-155.83	-158.623	-157.554	-158.192	-163.223	-161.039	-159.142	-160.63	-161.131	-159.612	-159.939				96.6	-164.051	-160.886	-159.372	-160.114	-164.558	-171.929	-170.278	-169.386	-167.136	-173.685	-170.583	-165.493	-159.587	-162.917	-156.802	-158.351				96.6	-157.598	-159.852	-158.358	-158.984	-158.998	-159.296	-160.171	-159.171
	96.7	-158.082	-158.527	-160.196	-157.949	-160.705	-156.452	-158.537	-158.206	-158.251	-163.28	-160.901	-158.795	-161.606	-161.623	-160.394	-159.365				96.7	-164.422	-161.445	-159.786	-160.201	-164.284	-171.078	-170.344	-170.577	-166.56	-174.104	-170.823	-165.29	-160.099	-162.003	-158.237	-158.81				96.7	-156.881	-159.839	-158.707	-158.715	-158.885	-158.954	-159.741	-158.741
	96.8	-158.575	-159.207	-160.23	-158.414	-160.555	-156.641	-158.748	-158.797	-159.026	-163.348	-160.954	-157.928	-161.735	-161.681	-161.249	-158.625				96.8	-164.304	-161.977	-160.433	-159.885	-163.417	-170.35	-170.31	-171.874	-166.457	-174.221	-171.16	-165.325	-160.781	-161.718	-158.931	-159.069				96.8	-156.783	-159.63	-159.048	-158.85	-158.956	-158.669	-159.675	-158.675
	96.9	-159.101	-159.603	-159.727	-159.072	-159.734	-156.998	-159.125	-159.019	-159.751	-162.936	-161.495	-157.632	-160.949	-161.436	-161.748	-158.068				96.9	-163.979	-161.608	-160.99	-159.692	-162.566	-170.233	-170.059	-172.614	-166.653	-173.743	-171.215	-165.287	-161.349	-161.432	-158.535	-159.169				96.9	-157.193	-159.427	-159.067	-159.273	-159.185	-158.854	-160.135	-159.135
	97	-159.197	-159.137	-159.126	-159.233	-158.555	-157.662	-159.236	-159.169	-160.312	-162.165	-161.966	-158.11	-159.963	-161.214	-161.872	-158.089				97	-163.517	-160.67	-161.344	-159.621	-162.807	-170.557	-169.54	-172.194	-166.898	-172.774	-170.782	-165.561	-161.596	-161.075	-156.993	-158.684				97	-157.744	-159.441	-159.313	-159.669	-159.644	-159.422	-160.672	-159.672
	97.1	-158.903	-158.526	-158.706	-158.734	-157.676	-157.78	-158.844	-159.589	-161.203	-161.592	-162.156	-158.624	-159.211	-160.993	-161.798	-158.579				97.1	-163.554	-160.169	-161.538	-159.292	-163.942	-171.023	-168.958	-171.007	-167.354	-172.12	-169.952	-166.312	-161.571	-161.126	-155.45	-157.666				97.1	-157.987	-159.638	-159.953	-160.013	-160.139	-159.848	-161.008	-160.008
	97.2	-158.266	-158.775	-158.44	-158.161	-157.407	-157.195	-157.828	-160.265	-162.233	-161.788	-162.277	-158.918	-158.746	-160.8	-161.547	-159.054				97.2	-164.335	-160.359	-161.263	-158.927	-164.728	-171.195	-168.668	-169.941	-167.721	-172.223	-169.099	-166.94	-161.476	-161.258	-154.978	-156.882				97.2	-157.961	-159.687	-160.202	-160.337	-160.131	-159.783	-161.229	-160.229
	97.3	-157.304	-159.458	-158.391	-157.98	-157.598	-156.735	-156.534	-160.617	-162.655	-162.701	-162.295	-159.141	-158.77	-160.759	-161.166	-159.076				97.3	-164.887	-160.787	-160.224	-159.006	-164.937	-170.826	-168.959	-169.47	-167.332	-172.56	-168.631	-166.963	-161.344	-161.04	-155.184	-157.021				97.3	-158.194	-159.59	-159.896	-160.487	-159.621	-159.607	-161.306	-160.306
	97.4	-156.529	-159.651	-158.386	-157.94	-158.185	-156.992	-155.913	-160.164	-162.342	-163.444	-162.102	-159.052	-159.087	-160.677	-160.692	-158.722				97.4	-164.335	-160.954	-158.757	-159.754	-165.364	-170.327	-169.576	-169.775	-166.26	-172.761	-168.411	-166.354	-161.306	-160.744	-155.243	-158.103				97.4	-158.709	-159.471	-159.728	-160.445	-159.183	-159.602	-161.202	-160.202
	97.5	-156.269	-159.428	-158.27	-157.785	-159.214	-157.654	-156.519	-159.529	-161.788	-163.242	-161.851	-158.634	-159.139	-160.437	-159.935	-158.652				97.5	-163.038	-160.796	-157.656	-161.039	-166.052	-170.302	-169.97	-170.359	-165.475	-172.827	-168.166	-165.466	-161.638	-160.458	-155.178	-158.979				97.5	-159.072	-159.178	-159.858	-160.228	-159.112	-159.656	-161.255	-160.255
	97.6	-156.283	-159.191	-158.273	-157.987	-160.258	-158.047	-157.775	-159.439	-161.26	-162.372	-161.646	-158.51	-158.969	-160.237	-159.152	-159.259				97.6	-161.979	-160.65	-157.383	-162.032	-166.224	-170.791	-170.063	-170.495	-165.378	-172.684	-168.279	-165.049	-162.463	-160.043	-155.488	-158.719				97.6	-159.05	-158.854	-159.698	-159.801	-159.314	-159.843	-161.627	-160.627
	97.7	-156.523	-158.829	-158.524	-158.745	-160.644	-158.012	-158.556	-159.571	-160.721	-161.729	-161.37	-158.993	-159.091	-160.14	-159.035	-160.054				97.7	-161.67	-160.695	-157.911	-162.226	-165.668	-171.286	-170.132	-170.368	-165.369	-172.554	-169.049	-165.346	-163.303	-159.824	-156.182	-157.915				97.7	-158.763	-158.963	-159.022	-159.27	-159.618	-160.123	-162.082	-161.082
	97.8	-157.094	-158.325	-158.884	-159.348	-160.512	-157.786	-158.387	-159.453	-160.503	-161.843	-160.991	-159.474	-159.576	-159.981	-159.669	-160.456				97.8	-161.812	-160.813	-158.938	-162.074	-164.992	-171.68	-170.033	-170.381	-165.349	-172.696	-169.787	-165.876	-163.42	-160.262	-156.666	-157.172				97.8	-158.493	-159.387	-158.383	-158.807	-159.907	-160.221	-162.439	-161.439
	97.9	-157.816	-158.144	-159.333	-159.443	-160.387	-157.416	-157.975	-159.352	-161.112	-162.442	-160.708	-159.327	-159.954	-159.859	-160.417	-160.588				97.9	-161.927	-160.993	-159.71	-161.844	-164.814	-172.317	-169.464	-170.254	-165.766	-173.054	-169.782	-166.326	-162.533	-161.306	-156.376	-156.334				97.9	-158.249	-159.697	-158.357	-158.68	-160.151	-160.208	-162.549	-161.549
	98	-158.468	-158.543	-159.756	-159.464	-160.038	-156.946	-157.927	-159.677	-162.293	-162.853	-160.533	-158.912	-160.083	-159.825	-160.874	-160.606				98	-161.99	-161.075	-159.686	-161.347	-165.121	-172.894	-168.771	-169.73	-166.401	-173.671	-169.382	-166.579	-161.066	-162.393	-155.726	-155.541				98	-157.902	-159.938	-158.941	-159.215	-160.185	-160.302	-162.335	-161.335
	98.1	-158.82	-159.235	-159.727	-159.52	-159.235	-156.817	-157.915	-160.208	-163.223	-162.547	-160.316	-158.902	-160.245	-160.007	-160.959	-160.255				98.1	-162.069	-160.79	-159.378	-160.817	-165.395	-172.778	-168.43	-169.077	-166.748	-174.281	-169.281	-166.512	-159.956	-162.843	-155.546	-155.567				98.1	-157.658	-160.111	-159.819	-160.24	-159.793	-160.398	-161.904	-160.904
	98.2	-158.738	-159.68	-159.215	-159.315	-158.423	-157.361	-157.573	-160.302	-163.275	-161.6	-160.329	-159.294	-160.557	-160.849	-160.681	-159.639				98.2	-162.046	-160.494	-159.435	-160.533	-165.245	-171.968	-168.394	-168.8	-166.738	-174.381	-169.342	-166.212	-159.819	-162.168	-155.801	-156.694				98.2	-157.565	-160.064	-160.526	-160.984	-159.122	-160.24	-161.339	-160.339
	98.3	-158.543	-159.458	-158.757	-159.118	-158.094	-158.226	-156.976	-159.902	-162.431	-160.665	-160.945	-159.655	-161.086	-161.995	-160.389	-159.258				98.3	-161.866	-160.582	-159.605	-160.054	-164.626	-170.876	-168.511	-169.107	-166.481	-174.051	-169.258	-165.854	-160.235	-160.868	-155.989	-157.852				98.3	-157.372	-159.922	-160.587	-161.025	-158.694	-159.959	-160.609	-159.609
	98.4	-158.543	-158.835	-158.504	-159.469	-158.476	-158.825	-156.639	-159.638	-161.469	-160.279	-162.056	-159.883	-161.755	-162.327	-160.329	-159.357				98.4	-161.616	-160.701	-159.62	-159.061	-163.613	-170.105	-168.635	-169.616	-166.185	-173.725	-169.392	-165.721	-160.514	-160.319	-156.223	-157.941				98.4	-157.127	-159.811	-160.026	-160.617	-158.818	-159.968	-160.036	-159.036
	98.5	-158.427	-158.52	-158.104	-159.955	-159.314	-158.992	-157.052	-159.749	-161.037	-160.461	-163.143	-159.97	-162.082	-161.704	-160.497	-159.72				98.5	-161.376	-160.367	-159.71	-158.098	-162.574	-170.079	-168.461	-170.108	-166.29	-173.647	-169.779	-165.848	-160.476	-160.938	-156.8	-157.022				98.5	-157.067	-159.582	-159.443	-160.062	-159.022	-160.338	-160.13	-159.13
	98.6	-157.925	-158.613	-157.752	-159.933	-159.748	-158.956	-157.84	-159.836	-160.927	-160.822	-163.584	-159.854	-161.786	-161.152	-160.92	-159.961				98.6	-161.303	-159.644	-159.674	-157.706	-162.168	-170.443	-168.038	-170.688	-166.872	-173.631	-169.959	-165.859	-160.327	-161.75	-157.317	-155.855				98.6	-157.219	-159.307	-159.206	-159.53	-158.805	-160.685	-160.712	-159.712
	98.7	-157.535	-158.638	-158.26	-159.817	-159.282	-158.875	-158.284	-159.697	-160.783	-161.243	-163.236	-159.65	-161.117	-161.182	-161.533	-160.097				98.7	-161.408	-159.011	-159.247	-157.719	-162.636	-170.473	-167.962	-170.932	-167.374	-173.403	-169.884	-165.779	-160.451	-162.037	-157.23	-155.297				98.7	-157.524	-159.348	-159.073	-159.315	-158.423	-160.642	-161.262	-160.262
	98.8	-157.665	-158.569	-159.556	-159.915	-158.388	-158.562	-158.226	-159.487	-160.753	-161.808	-162.521	-159.276	-160.406	-161.354	-162.18	-160.396				98.8	-161.421	-158.99	-158.85	-157.668	-163.602	-170.227	-168.745	-170.663	-167.593	-173.258	-169.763	-166.011	-160.994	-161.825	-156.691	-155.462				98.8	-157.903	-159.546	-159.033	-159.382	-158.247	-160.27	-161.548	-160.548
	98.9	-157.845	-158.748	-160.389	-159.813	-157.783	-157.87	-158.013	-159.312	-161.021	-161.877	-161.801	-158.681	-159.876	-161.431	-162.492	-160.733				98.9	-161.011	-159.704	-158.951	-157.611	-164.421	-170.211	-170.03	-170.573	-167.724	-173.483	-169.559	-166.722	-161.895	-161.083	-156.368	-155.726				98.9	-158.334	-159.367	-159.335	-159.238	-158.349	-159.882	-161.475	-160.475
	99	-157.687	-159.133	-159.993	-159.414	-157.607	-157.335	-157.975	-158.965	-161.291	-161.166	-161.214	-158.253	-159.73	-161.544	-162.087	-160.834				99	-160.165	-160.609	-159.254	-158.022	-164.681	-170.383	-170.868	-170.9	-167.88	-173.451	-169.302	-167.87	-162.833	-160.067	-156.48	-155.856				99	-158.827	-158.959	-159.671	-158.829	-158.711	-159.535	-161.085	-160.085
	99.1	-157.623	-159.268	-159.028	-159.045	-157.633	-157.734	-158.003	-158.402	-161.06	-160.494	-160.808	-158.356	-159.988	-161.655	-161.377	-160.648				99.1	-159.543	-161.218	-159.147	-158.702	-164.249	-170.543	-170.76	-171.139	-168.174	-172.692	-169.385	-168.738	-163.257	-159.601	-156.335	-156.09				99.1	-159.136	-158.687	-159.452	-158.764	-159.001	-159.158	-160.493	-159.493
	99.2	-158.077	-158.868	-158.578	-158.718	-157.896	-158.768	-157.783	-158.336	-160.299	-160.314	-160.661	-159.076	-160.437	-161.585	-161.166	-160.014				99.2	-159.808	-161.625	-158.7	-158.927	-163.444	-170.796	-170.308	-171.038	-168.479	-172.066	-169.894	-168.467	-162.786	-159.876	-155.629	-156.568				99.2	-159.179	-158.364	-158.664	-159.275	-159.019	-158.825	-159.783	-158.783
	99.3	-158.69	-158.258	-158.894	-158.474	-158.295	-159.206	-157.267	-159.136	-159.738	-160.469	-160.888	-160.146	-160.998	-161.07	-161.567	-159.052				99.3	-160.716	-161.705	-158.67	-158.558	-163.329	-171.144	-170.536	-170.684	-168.451	-172.762	-170.223	-167.564	-161.488	-160.306	-155.047	-157.04				99.3	-159.354	-158	-157.9	-159.609	-159.152	-158.784	-159.341	-158.341
	99.4	-158.868	-157.931	-159.442	-158.581	-158.389	-158.747	-156.525	-160.083	-160.022	-160.792	-161.348	-160.837	-161.649	-160.047	-162.05	-158.561				99.4	-161.547	-161.306	-159.01	-158.024	-164.502	-171.109	-171.518	-170.076	-168.216	-174.37	-169.757	-166.967	-160.552	-160.49	-155.019	-157.085				99.4	-159.78	-158.146	-157.549	-159.082	-159.435	-159.088	-159.591	-158.591
	99.5	-158.782	-157.864	-159.693	-158.985	-158.305	-158.208	-155.813	-160.57	-160.683	-160.956	-161.661	-160.657	-162.031	-159.007	-162.229	-159.017				99.5	-162.143	-161.005	-159.192	-157.768	-166.186	-170.442	-172.306	-169.191	-168.168	-175.274	-168.824	-166.452	-160.997	-160.546	-155.331	-156.673				99.5	-159.939	-158.856	-157.714	-158.297	-159.351	-159.464	-160.235	-159.235
	99.6	-158.933	-157.761	-159.48	-159.309	-158.581	-157.835	-155.815	-160.718	-160.877	-160.929	-161.732	-159.93	-161.767	-158.445	-162.197	-159.711				99.6	-162.748	-161.351	-159.501	-158.008	-167.009	-169.688	-171.955	-168.303	-168.386	-174.992	-168.344	-165.811	-161.84	-160.834	-156.079	-156.271				99.6	-159.611	-159.356	-158.49	-158.305	-158.936	-159.746	-160.599	-159.599
	99.7	-159.148	-157.875	-159.024	-159.561	-159.215	-157.341	-156.725	-160.602	-160.74	-160.962	-161.741	-159.358	-160.848	-158.638	-162.076	-159.969				99.7	-163.375	-162.076	-159.895	-158.638	-166.288	-169.571	-170.503	-167.866	-168.836	-174.396	-168.585	-165.551	-161.711	-161.364	-157.423	-156.355				99.7	-159.27	-159.256	-159.454	-158.982	-158.777	-159.799	-160.69	-159.69
	99.8	-159.17	-158.475	-158.742	-160.106	-159.846	-156.96	-157.706	-159.934	-160.99	-161.224	-161.72	-159.332	-159.658	-159.708	-161.811	-159.991				99.8	-163.763	-162.597	-159.691	-159.278	-164.888	-170.063	-169.229	-167.902	-169.234	-174.218	-168.993	-165.728	-160.824	-161.843	-158.686	-157.045				99.8	-159.231	-158.963	-160.098	-159.403	-158.984	-159.614	-160.753	-159.753
	99.9	-159.316	-158.909	-158.793	-160.818	-160.043	-156.987	-158.117	-158.999	-161.645	-161.862	-161.661	-159.59	-158.781	-161.1	-161.565	-159.943				99.9	-163.594	-162.585	-159.108	-159.432	-164.129	-170.7	-169.098	-168.017	-169.069	-174.084	-169.031	-165.638	-160.18	-162.092	-158.99	-157.738				99.9	-159.274	-158.803	-160.244	-159.143	-159.235	-159.464	-160.628	-159.628
	100	-159.599	-158.473	-158.817	-161.147	-159.603	-157.406	-158.29	-158.635	-162.18	-162.713	-161.413	-159.482	-158.346	-161.718	-161.498	-159.61				100	-163.006	-162.073	-158.947	-158.918	-164.101	-171.448	-169.524	-168.11	-168.358	-173.343	-168.62	-165.208	-160.133	-162.206	-158.167	-157.575				100	-159.103	-158.793	-159.677	-158.428	-159.55	-159.272	-160.443	-159.443
	100.1	-159.792	-157.782	-158.488	-160.874	-158.921	-158.212	-158.698	-158.951	-162.259	-163.284	-160.903	-158.822	-158.166	-161.207	-161.424	-159.054				100.1	-162.68	-161.439	-159.226	-158.444	-164.098	-172.195	-169.716	-168.34	-167.467	-172.529	-168.161	-165.127	-160.093	-162.342	-156.786	-156.634				100.1	-158.674	-158.989	-158.781	-157.836	-160.02	-158.886	-160.641	-159.641
	100.2	-160.212	-157.946	-158.242	-160.359	-158.617	-158.941	-159.043	-159.352	-162.022	-163.296	-160.827	-158.328	-158.336	-160.518	-161.13	-158.851				100.2	-162.844	-161.005	-159.534	-158.94	-163.916	-172.362	-169.549	-168.831	-166.739	-172.698	-168.159	-165.491	-159.917	-162.441	-155.72	-155.836				100.2	-158.203	-159.244	-158.407	-157.937	-160.319	-158.802	-161.213	-160.213
	100.3	-160.642	-158.903	-158.605	-160.034	-158.952	-158.867	-158.923	-159.399	-161.872	-163.037	-161.613	-158.817	-158.794	-160.654	-160.593	-159.086				100.3	-163.049	-160.771	-159.711	-160.168	-164.025	-171.906	-169.078	-169.448	-166.578	-173.861	-168.771	-166.122	-160.369	-162.28	-155.307	-155.857				100.3	-157.968	-159.162	-158.572	-158.567	-160.211	-159.305	-161.59	-160.59
	100.4	-160.323	-159.492	-159.312	-159.895	-159.805	-158.238	-158.532	-159.043	-161.947	-162.896	-162.379	-160.256	-159.107	-161.429	-159.995	-159.192				100.4	-162.918	-160.472	-159.577	-161.046	-164.667	-171.538	-168.826	-169.652	-166.903	-174.946	-169.602	-166.92	-161.571	-161.773	-155.393	-156.371				100.4	-158.051	-158.811	-158.63	-159.071	-160.097	-159.897	-161.216	-160.216
	100.5	-159.584	-158.975	-159.767	-159.901	-160.632	-157.769	-158.022	-158.663	-162	-162.645	-162.314	-161.672	-159.038	-162.133	-159.634	-159.087				100.5	-162.362	-159.857	-159.11	-161.168	-165.203	-171.647	-169.355	-169.348	-167.412	-174.925	-169.864	-167.362	-162.47	-161.322	-156.031	-156.505				100.5	-158.271	-158.738	-158.356	-159.248	-160.183	-160.234	-160.218	-159.218
	100.6	-159.173	-158.108	-159.832	-160.044	-160.824	-157.356	-157.19	-158.713	-161.842	-162.025	-161.935	-162.192	-158.893	-162.446	-159.652	-159.286				100.6	-161.466	-159.281	-158.669	-160.794	-165.079	-171.787	-170.129	-169.332	-167.813	-173.816	-169.519	-167.291	-162.503	-161.509	-157.157	-156.046				100.6	-158.22	-159.339	-158.144	-159.195	-160.137	-160.369	-159.565	-158.565
	100.7	-158.994	-157.917	-159.953	-159.896	-160.457	-156.855	-155.943	-159.228	-161.67	-161.332	-162.131	-161.78	-158.935	-162.059	-160.005	-159.957				100.7	-160.587	-159.289	-158.73	-160.285	-164.451	-171.6	-170.699	-170.056	-167.644	-172.594	-169.481	-167.21	-162.415	-162.321	-158.021	-155.788				100.7	-157.863	-160.337	-158.274	-158.864	-159.916	-160.412	-159.99	-158.99
	100.8	-158.736	-158.315	-160.237	-159.357	-160.099	-156.84	-154.996	-159.874	-161.654	-160.901	-162.571	-160.863	-158.976	-161.015	-160.293	-160.709				100.8	-160.39	-159.764	-159.566	-159.988	-163.807	-171.276	-171.321	-171.085	-167.004	-172.09	-169.927	-167.353	-162.722	-163.098	-158.018	-156.183				100.8	-157.888	-161.053	-158.586	-158.42	-159.622	-160.578	-160.957	-159.957
	100.9	-158.378	-159.087	-160.288	-159.084	-159.927	-157.384	-155.441	-160.267	-161.7	-160.89	-162.452	-159.912	-159.067	-160.314	-160.365	-161.207				100.9	-160.944	-160.275	-160.952	-159.642	-163.683	-170.94	-171.594	-171.805	-166.799	-172.262	-170.227	-167.857	-163.04	-163.394	-157.688	-156.519				100.9	-158.489	-161.199	-158.816	-158.303	-159.33	-160.869	-161.337	-160.337
	101	-157.98	-160.109	-159.948	-159.32	-159.473	-157.854	-157.047	-160.346	-161.938	-161.435	-162.105	-159.28	-159.614	-160.449	-160.653	-161.16				101	-161.43	-160.878	-162.114	-158.829	-164.078	-170.696	-171.027	-171.741	-167.228	-172.774	-170.147	-168.757	-162.986	-163.132	-157.859	-156.41				101	-158.815	-160.678	-158.783	-158.585	-159.26	-161.005	-160.744	-159.744
	101.1	-157.704	-160.624	-159.558	-159.497	-158.8	-158.156	-158.258	-160.193	-162.403	-162.341	-162.083	-159.174	-160.441	-160.639	-161.162	-160.465				101.1	-161.299	-161.648	-162.185	-157.972	-164.336	-170.591	-170.211	-170.647	-167.561	-173.349	-169.996	-169.181	-162.387	-162.077	-158.441	-156.297				101.1	-158.698	-159.653	-158.612	-158.76	-159.331	-160.881	-159.913	-158.913
	101.2	-157.742	-160.377	-159.783	-159.337	-158.641	-158.569	-158.335	-159.916	-162.659	-162.928	-161.908	-159.508	-160.951	-160.416	-161.242	-159.687				101.2	-160.76	-162.2	-161.198	-157.647	-164.302	-170.374	-169.995	-169.155	-167.466	-173.658	-170.157	-168.244	-161.588	-160.867	-158.678	-156.151				101.2	-158.82	-158.782	-158.569	-158.69	-159.327	-160.583	-159.752	-158.752
	101.3	-157.989	-159.961	-160.522	-159.124	-158.935	-158.923	-158.036	-159.698	-162.462	-162.832	-161.444	-160.024	-161.095	-160.08	-160.673	-159.328				101.3	-160.394	-162.308	-160.197	-157.859	-164.29	-170.012	-170.399	-168.533	-167.36	-173.288	-170.597	-166.527	-161.255	-160.907	-158.293	-155.625				101.3	-159.144	-158.395	-158.629	-158.786	-159.244	-160.2	-160.215	-159.215
	101.4	-158.274	-159.581	-160.745	-159.006	-158.993	-158.749	-158.079	-159.738	-161.972	-162.599	-161.553	-160.421	-161.161	-159.693	-160.202	-159.264				101.4	-160.618	-162.022	-159.921	-158.432	-164.128	-169.776	-170.891	-169.183	-167.626	-172.248	-170.696	-165.357	-161.276	-161.953	-157.47	-154.843				101.4	-159.205	-158.25	-158.545	-159.155	-158.979	-159.639	-160.529	-159.529
	101.5	-158.61	-159.105	-160.321	-158.892	-158.782	-158.154	-158.219	-160.132	-161.487	-162.66	-162.048	-160.299	-161.082	-159.508	-160.473	-159.32				101.5	-161.039	-161.438	-160.247	-159.288	-163.824	-169.869	-170.96	-169.974	-168.001	-171.404	-170.017	-165.325	-161.158	-162.543	-156.479	-154.312				101.5	-158.954	-158.197	-158.17	-159.422	-158.497	-158.771	-160.333	-159.333
	101.6	-158.978	-158.703	-160.145	-158.867	-158.785	-157.8	-158.051	-160.527	-161.299	-162.599	-161.798	-159.626	-160.812	-160.098	-161.214	-159.547				101.6	-160.977	-160.806	-160.56	-160.158	-163.991	-170.229	-170.227	-169.632	-168.168	-171.347	-169.091	-166.046	-161.089	-162.315	-155.783	-154.797				101.6	-158.572	-158.452	-157.728	-159.207	-158.133	-157.986	-160.185	-159.185
	101.7	-159.262	-158.654	-160.333	-159.155	-159.102	-157.737	-157.544	-160.446	-161.32	-162.086	-161.016	-158.912	-160.554	-161.026	-161.957	-159.887				101.7	-160.879	-160.402	-160.385	-160.415	-164.562	-170.492	-169.027	-168.187	-168.473	-171.81	-168.827	-166.888	-161.32	-161.949	-155.799	-156.344				101.7	-158.326	-159.097	-157.732	-158.647	-158.104	-158.156	-160.671	-159.671
	101.8	-159.519	-158.875	-160.353	-159.616	-159.343	-157.319	-156.959	-160.108	-161.346	-161.442	-160.761	-158.446	-160.448	-161.247	-162.261	-160.2				101.8	-161.493	-160.34	-159.921	-159.828	-164.863	-170.671	-168.579	-166.681	-168.99	-172.512	-169.422	-167.418	-161.663	-161.856	-156.343	-157.73				101.8	-158.318	-159.733	-158.407	-158.369	-158.296	-159.195	-161.408	-160.408
	101.9	-159.617	-159.01	-160.02	-159.818	-159.352	-156.553	-156.778	-159.92	-161.426	-160.915	-161.097	-158.138	-160.396	-160.761	-161.899	-160.387				101.9	-162.378	-160.478	-159.628	-159.158	-164.669	-171.153	-169.18	-166.251	-168.932	-173.305	-170.3	-167.433	-162.164	-161.798	-156.797	-157.765				101.9	-158.252	-159.938	-159.328	-158.602	-158.703	-159.986	-161.611	-160.611
	102	-159.206	-158.988	-159.515	-159.409	-159.296	-156.18	-156.89	-159.726	-161.419	-160.458	-161.403	-158.033	-160.01	-160.571	-161.487	-160.312				102	-162.853	-160.379	-159.721	-158.995	-164.099	-171.878	-169.546	-167.296	-167.952	-173.899	-170.528	-167.075	-162.952	-161.357	-156.715	-156.714				102	-157.904	-159.778	-159.771	-159.101	-159.376	-159.995	-161.272	-160.272
	102.1	-158.61	-158.937	-159.149	-158.435	-159.294	-156.576	-156.724	-159.483	-161.25	-160.429	-161.415	-158.36	-159.284	-161.143	-161.416	-159.968				102.1	-163.038	-160.083	-159.945	-158.909	-163.296	-172.506	-169.072	-169.113	-166.838	-173.965	-169.547	-166.677	-163.511	-160.685	-156.224	-155.923				102.1	-157.587	-159.551	-159.602	-159.658	-160.003	-159.654	-161.003	-160.003
	102.2	-158.448	-158.711	-158.977	-157.602	-159.236	-157.361	-156.633	-159.426	-161.311	-161.006	-161.305	-159.082	-158.909	-161.891	-161.039	-159.519				102.2	-163.261	-160.052	-159.727	-158.74	-162.642	-172.571	-168.681	-170.473	-166.637	-173.383	-168.184	-166.212	-163.215	-160.317	-155.769	-155.79				102.2	-157.55	-159.436	-159.335	-160.165	-160.192	-159.448	-160.936	-159.936
	102.3	-158.619	-158.139	-158.849	-157.514	-158.926	-157.839	-157.431	-159.383	-161.815	-161.507	-161.297	-159.575	-159.255	-162.303	-159.964	-159.06				102.3	-163.577	-160.191	-159.188	-159.039	-162.76	-172.036	-168.913	-170.748	-167.693	-172.664	-167.534	-165.725	-162.145	-160.637	-155.759	-155.571				102.3	-157.64	-159.529	-159.146	-160.69	-160.042	-159.504	-160.71	-159.71
	102.4	-158.657	-157.622	-158.958	-158.011	-158.582	-157.821	-158.783	-159.061	-162.444	-161.552	-161.417	-159.392	-159.631	-162.275	-159.045	-158.673				102.4	-163.591	-160.408	-158.934	-159.943	-163.781	-171.71	-169.265	-170.123	-169.533	-172.607	-167.509	-165.757	-161.063	-161.358	-156.427	-155.134				102.4	-158.005	-159.84	-158.719	-161.072	-159.982	-159.632	-160.352	-159.352
	102.5	-158.76	-157.616	-159.386	-158.734	-158.659	-157.748	-159.68	-158.783	-162.659	-161.394	-161.368	-159.074	-159.348	-161.663	-159.115	-158.678				102.5	-162.785	-161.063	-158.963	-160.684	-164.7	-171.741	-169.77	-169.427	-171.043	-173.205	-167.807	-166.437	-160.808	-161.615	-157.486	-155.213				102.5	-158.788	-160	-158.248	-160.889	-160.068	-159.538	-160.142	-159.142
	102.6	-159.634	-157.727	-159.624	-159.41	-159.108	-157.817	-159.781	-159.023	-162.138	-161.205	-160.956	-159.391	-158.842	-160.704	-159.86	-159.046				102.6	-161.53	-161.844	-158.815	-160.606	-164.391	-171.505	-171.009	-169.491	-171.305	-173.867	-168.202	-167.102	-161.16	-161.089	-158.218	-155.808				102.6	-159.236	-159.536	-158.37	-160.389	-160.186	-159.341	-160.201	-159.201
	102.7	-161.008	-157.445	-159.572	-159.684	-159.371	-157.749	-159.264	-159.369	-161.171	-161.179	-160.557	-160.184	-158.874	-160.071	-160.728	-159.047				102.7	-160.868	-161.92	-158.232	-160.283	-163.155	-170.948	-172.378	-169.993	-170.522	-174.31	-168.19	-167.253	-161.332	-160.553	-157.863	-156.323				102.7	-158.649	-158.506	-159.188	-160.078	-160.318	-159.364	-160.636	-159.636
	102.8	-161.599	-157.155	-159.837	-159.562	-159.227	-157.626	-158.211	-159.201	-160.404	-161.51	-160.396	-160.735	-159.407	-160.136	-161.645	-158.241				102.8	-160.922	-161.209	-157.65	-160.428	-162.265	-170.499	-172.423	-170.031	-169.36	-174.361	-168.047	-167.109	-161.494	-160.74	-156.36	-156.71				102.8	-157.612	-157.63	-160.119	-159.83	-160.224	-159.574	-161.229	-160.229
	102.9	-160.844	-157.398	-160.535	-159.396	-159.081	-157.602	-157.015	-158.792	-160.11	-161.948	-160.336	-160.604	-160.018	-160.692	-162.571	-157.318				102.9	-161.021	-160.424	-157.697	-160.611	-162.387	-170.283	-171.148	-169.761	-168.101	-173.929	-168.643	-167.153	-162.131	-161.356	-155.333	-156.84				102.9	-157.291	-157.58	-160.416	-159.396	-159.794	-159.808	-161.402	-160.402
	103	-159.552	-157.962	-160.996	-159.367	-158.993	-157.502	-156.483	-158.556	-160.121	-162.113	-160.658	-160.009	-160.481	-161.256	-163.253	-157.179				103	-161.315	-160.356	-158.136	-160.297	-163.335	-170.273	-170.159	-169.695	-167.001	-173.362	-169.68	-167.478	-162.459	-161.852	-156.036	-156.041				103	-158.03	-158.125	-159.852	-158.896	-159.479	-159.954	-160.838	-159.838
	103.1	-158.745	-158.329	-160.834	-159.319	-158.394	-157.399	-156.879	-158.277	-160.25	-162.086	-161.509	-159.521	-160.46	-161.625	-163.383	-157.817				103.1	-162.317	-161.096	-158.502	-159.852	-164.663	-170.75	-170.339	-169.658	-166.461	-172.885	-170.095	-167.349	-161.645	-162.214	-157.22	-154.455				103.1	-159.097	-158.57	-159.005	-158.656	-159.733	-159.647	-159.964	-158.964
	103.2	-158.54	-158.475	-160.397	-159.075	-157.363	-157.326	-157.702	-157.855	-160.439	-161.89	-162.181	-159.369	-159.821	-161.934	-162.898	-158.481				103.2	-163.635	-162.051	-158.774	-159.868	-165.741	-171.689	-170.935	-169.545	-166.375	-172.436	-169.885	-166.323	-160.5	-162.654	-157.398	-153.426				103.2	-159.752	-158.871	-158.374	-158.888	-160.299	-158.881	-159.657	-158.657
	103.3	-158.508	-158.644	-160.068	-158.826	-156.626	-157.097	-158.395	-157.877	-160.811	-161.575	-162.126	-159.52	-159.261	-162.364	-162.19	-158.633				103.3	-164.42	-162.725	-159.036	-160.324	-166.111	-172.463	-171.136	-169.414	-166.475	-172.481	-169.702	-165.453	-160.127	-163.041	-157.065	-153.628				103.3	-159.931	-159.284	-157.918	-159.413	-160.445	-158.297	-160.223	-159.223
	103.4	-158.407	-158.781	-159.763	-158.928	-156.503	-157.074	-158.642	-158.58	-161.708	-161.522	-161.742	-160.115	-159.322	-162.655	-161.431	-158.518				103.4	-164.112	-163.039	-159.4	-160.949	-165.863	-172.773	-171.012	-169.337	-166.813	-173.123	-169.546	-165.847	-160.429	-162.722	-156.984	-154.418				103.4	-159.714	-159.714	-157.763	-159.832	-159.872	-158.207	-160.883	-159.883
	103.5	-158.263	-158.844	-159.419	-159.314	-156.854	-157.604	-158.438	-159.486	-162.994	-161.653	-161.449	-161.102	-159.59	-162.353	-160.559	-158.474				103.5	-162.81	-163.095	-159.856	-161.583	-165.282	-172.64	-170.856	-169.502	-167.238	-173.35	-169.014	-167.155	-160.667	-161.342	-156.951	-155.069				103.5	-159.14	-159.875	-157.782	-159.922	-159.01	-158.511	-160.895	-159.895
	103.6	-158.22	-159.058	-159.247	-159.792	-157.328	-158.228	-158.101	-160.169	-163.56	-161.639	-160.874	-161.839	-159.665	-161.832	-159.768	-158.591				103.6	-161.359	-162.778	-160.119	-162.101	-164.73	-172.102	-170.672	-169.708	-167.532	-172.796	-167.945	-168.336	-160.376	-159.769	-156.747	-155.256				103.6	-158.571	-159.775	-157.505	-159.686	-158.252	-159.152	-160.467	-159.467
	103.7	-158.358	-159.54	-159.326	-160.424	-157.855	-158.386	-157.983	-160.271	-162.992	-161.595	-159.953	-161.794	-159.621	-161.736	-159.425	-158.863				103.7	-160.573	-162.32	-159.9	-162.38	-164.544	-171.308	-170.461	-169.558	-167.735	-172.064	-166.494	-168.677	-159.792	-159.306	-156.431	-155.059				103.7	-158.529	-159.776	-157.026	-159.299	-157.702	-159.954	-160.172	-159.172
	103.8	-158.467	-159.94	-159.407	-161.06	-158.725	-158.372	-158.224	-159.974	-162.28	-161.33	-159.72	-161.302	-159.558	-161.629	-159.834	-159.149				103.8	-160.665	-162.304	-159.3	-161.887	-164.671	-170.54	-170.21	-169.198	-167.709	-171.513	-165.404	-168.364	-159.494	-160.397	-156.247	-154.846				103.8	-159.037	-160.071	-156.854	-159.125	-157.632	-160.547	-160.248	-159.248
	103.9	-158.366	-159.776	-159.166	-161.123	-159.753	-158.674	-158.57	-159.903	-161.885	-160.725	-160.74	-160.733	-159.538	-160.825	-160.741	-159.429				103.9	-161.233	-162.594	-158.801	-160.496	-164.749	-169.856	-169.765	-169.182	-167.516	-171.505	-165.788	-168.298	-159.758	-162.442	-156.576	-155.125				103.9	-159.419	-160.516	-157.227	-159.218	-158.118	-160.569	-160.581	-159.581
	104	-158.3	-159.225	-158.543	-160.349	-160.352	-159.043	-158.691	-160.155	-161.59	-160.653	-162.015	-160.204	-159.477	-159.934	-161.568	-159.705				104	-161.564	-162.666	-158.974	-159.472	-164.606	-169.189	-169.237	-169.611	-167.535	-172.347	-167.63	-168.764	-160.35	-164.242	-157.446	-156.24				104	-159.191	-160.858	-157.909	-159.405	-158.764	-159.941	-160.871	-159.871
	104.1	-158.453	-158.892	-158.131	-159.393	-160.176	-159.05	-158.618	-160.468	-161.674	-161.606	-162.314	-160.138	-159.263	-159.979	-162.126	-159.688				104.1	-161.656	-162.599	-159.815	-159.801	-164.144	-168.903	-169.091	-169.819	-167.741	-173.547	-169.42	-168.999	-160.894	-164.885	-158.232	-157.802				104.1	-158.601	-160.969	-158.487	-159.625	-159.3	-158.933	-160.775	-159.775
	104.2	-158.636	-158.905	-158.507	-159.063	-159.282	-158.572	-158.447	-160.772	-162.201	-162.67	-161.519	-160.559	-159.087	-160.833	-162.339	-159.337				104.2	-162.107	-162.661	-160.522	-160.611	-163.16	-169.46	-169.691	-169.274	-167.803	-174.388	-169.925	-168.433	-160.951	-164.375	-158.384	-158.907				104.2	-158.141	-160.982	-158.819	-159.658	-159.553	-157.993	-160.449	-159.449
	104.3	-158.919	-158.929	-159.345	-159.454	-158.285	-157.92	-158.307	-160.891	-162.526	-162.89	-160.372	-160.935	-159.044	-161.764	-162.08	-159.127				104.3	-162.852	-162.605	-160.356	-160.654	-162.011	-170.413	-170.755	-168.539	-167.524	-174.435	-169.457	-167.433	-160.284	-163.53	-158.193	-159.114				104.3	-157.901	-161.035	-158.929	-159.302	-159.41	-157.543	-160.274	-159.274
	104.4	-159.309	-158.931	-159.818	-159.978	-157.974	-157.611	-158.288	-160.667	-162.34	-162.537	-159.667	-161.171	-159.125	-162.377	-161.612	-159.194				104.4	-163.491	-162.188	-159.336	-159.918	-161.577	-170.959	-171.452	-168.386	-166.972	-173.792	-169.078	-166.842	-159.402	-162.826	-158.031	-158.59				104.4	-157.722	-160.789	-158.714	-158.786	-159.277	-157.8	-160.151	-159.151
	104.5	-159.384	-159.141	-159.516	-159.942	-158.479	-157.68	-158.318	-160.328	-161.894	-162.366	-159.65	-161.262	-159.303	-162.41	-161.408	-159.076				104.5	-163.928	-161.817	-158.188	-159.114	-162.04	-171.335	-171.555	-168.564	-166.747	-173.147	-169.363	-166.924	-159.438	-161.908	-157.68	-157.603				104.5	-157.756	-160.012	-158.173	-158.495	-159.57	-158.404	-160.004	-159.004
	104.6	-159.184	-159.397	-158.795	-159.553	-159.212	-157.822	-158.375	-160.121	-161.408	-162.243	-159.876	-160.793	-159.23	-161.942	-161.472	-158.756				104.6	-163.936	-161.879	-157.735	-158.878	-162.719	-172.147	-171.586	-168.368	-167.31	-172.906	-169.988	-166.941	-160.584	-160.686	-157.047	-156.53				104.6	-158.076	-159.521	-157.788	-158.443	-159.919	-158.882	-160.032	-159.032
	104.7	-159.091	-159.239	-158.171	-159.477	-159.621	-157.987	-158.439	-159.975	-161.031	-161.599	-159.865	-159.916	-158.671	-161.539	-161.487	-158.764				104.7	-163.271	-162.143	-158.213	-159.198	-162.921	-172.859	-171.48	-167.978	-167.981	-172.918	-170.366	-166.565	-161.729	-159.646	-156.743	-155.827				104.7	-158.267	-159.907	-157.824	-158.369	-159.805	-159.295	-160.141	-159.141
	104.8	-159.007	-158.597	-157.723	-159.49	-159.844	-158.123	-158.215	-159.747	-160.679	-160.731	-159.766	-159.273	-158.154	-161.596	-161.454	-159.214				104.8	-162.256	-162.058	-159	-159.471	-162.586	-172.874	-170.988	-168.153	-167.853	-172.913	-170.272	-166.392	-162.124	-159.237	-157.158	-155.661				104.8	-158.275	-160.237	-157.969	-158.234	-159.382	-159.726	-160.023	-159.023
[truncated: 15,335 more rows]
[truncated: 108 more columns]
