# Supplementary material for: Conserved allosteric inhibition mechanism in SLC1 transporters
Source: eLife. 2023 Mar 1;12:e83464. doi: 10.7554/eLife.83464 (PMC10017108; doi:10.7554/eLife.83464)
Supplement: Figure 9—figure supplement 1—source data 1. [file elife-83464-fig9-figsupp1-data1.xlsx]

## Sheet: Sheet1
Figure S6 original data		F136Y/I237M Voltage Dependence (absence of Ser)
																												Figure S4C	Voltage-Current relationship
Figure S6A	F136Y/I237M V-jump no ucph (absence of Ser)														Figure S6B	F136Y/I237M V-jump plus ucph (absence of Ser)													F136Y/I237M V-jump plus ucph (absence of Ser)
			time(ms)	trace1	trace2	trace3	trace4	trace5	trace6	trace7	trace8	trace9				time(ms)	trace1	trace2	trace3	trace4	trace5	trace6	trace7	trace8	trace9
			0	-2.5	0	-1.75	-2.75	0.25	0.75	-0.25	-0.75	-3.5				0	-0.5	2.5	2.5	4	2.5	0.75	1.25	0.75	-3.5					Relative Current (n=7)
			0.04	-3	-1.25	-1.75	-3	-0.25	-1.75	0	-1.5	-1.75				0.04	-1	0.5	1	3	5.5	-1.25	2	1.75	-1			no UCPH	Voltage (mV)	exp1	exp2	exp3	exp4	exp5	exp6	exp7		ave	std
			0.08	-1.25	-4.5	-3.25	-2.25	-3.5	-2.5	-2	-2.75	0				0.08	-0.25	0.5	-0.25	1.75	2	-3.25	1.25	0	3.25				-100	0.26435	0.729655	0.855773	0.45624	0.633398	0.434436	0.298399		0.524607	0.221833
			0.12	1	-4.75	-5.25	0.5	-2.25	-3.25	-1.5	-3	0.25				0.12	2.5	0.25	-0.25	-1.25	-1	-1.75	2.25	-2.5	6.5				-80	0.184386	0.463337	0.649039	0.364992	0.407879	0.424889	0.131731		0.375179	0.174205
			0.16	2.75	-1.75	-4.5	0	-3.75	-2.5	-0.25	-3	0				0.16	3.75	0.25	0.5	-2.75	-4.25	0.5	1.5	-2	4.75				-60	0.143933	0.209912	0.339739	0.158285	0.19115	0.233928	-0.0451254		0.175974	0.116751
			0.2	2.25	-2	-1.75	-2.75	-1.5	-3.25	1	-3	-1				0.2	5.5	1.75	0.75	0.5	-2.75	1.75	1	-1.5	1.75				-40	0.00282212	-0.00644661	-0.0224361	-0.0297947	-0.034211	0.0550607	-0.208154		-0.034737	0.0821827
			0.24	0.25	-0.5	0	-0.75	-1.5	1	1.75	0.5	1				0.24	3.75	3	0.75	1.5	-0.75	4.5	2.75	-1	2.25				-20	-0.262464	-0.226431	-0.366984	-0.221599	-0.192718	-0.123806	-0.323147		-0.245307	0.0812457
			0.28	0.75	2	0	-0.75	-1	1.25	0	2.25	1.75				0.28	3.75	4	0.25	0.25	1.5	2.25	3	0.75	5.75				0	-0.586546	-0.424255	-0.610574	-0.39106	-0.441307	-0.375875	-0.388648		-0.459752	0.0976678
			0.32	-1.5	-0.25	0.75	-2.5	2	1.75	-2	2.75	1				0.32	2.75	3.25	2	-2.75	2.25	2.5	1.5	2.75	4				20	-0.783629	-0.609188	-0.884611	-0.631285	-0.580353	-0.62858	-0.469434		-0.655297	0.137011
			0.36	-3.5	0.5	3.25	-0.5	0.5	-0.25	-1.25	1	-4.25				0.36	0	0	4	-1	2	0.75	1.75	1.5	-3.25				40	-0.800563	-0.8332	-0.969553	-0.836127	-0.859229	-0.891472	-0.691413		-0.840223	0.0851444
			0.4	-2.25	-1	-1.75	1.5	-1.25	-3.5	-1.5	-2	-6.75				0.4	-0.25	-2.5	-1.25	2.5	1.25	-1.5	1.25	1.5	-4.75				60	-1	-1	-1	-1	-1	-1	-1		-1	0
			0.44	-2.5	0.25	-4.25	-1.5	0	-4	-3.5	-3	-3.5				0.44	1.25	0	-2.5	0.75	3.25	0.75	-0.5	2	-0.75
			0.48	0.25	0.5	-2	-4.75	-0.25	-2.25	-2.75	-2.75	0.25				0.48	5	2	2.25	-0.25	2.75	0.75	0.75	0.75	2.75				-100	0.387582	0.355359	0.299687	0.385594		0.116448			0.308934	0.113307
			0.52	1.25	0.5	0	-3.75	-1.5	-1.5	-2.75	-1.25	-1.75				0.52	4.25	3	3	1	-0.75	1	-0.75	0.75	1.5				-80	0.274224	0.244561	0.198725	0.272443		0.0764188			0.213274	0.0823646
			0.56	1.25	0.5	1.25	-0.75	-1.5	-3.5	-0.25	-2.5	-4.75				0.56	3	2.5	2	1.75	-2	-0.25	1.25	1.5	-1.25			plus UCPH	-60	0.166511	0.118049	0.110576	0.142656		0.00800449			0.109159	0.0606724
			0.6	0.5	-1.5	0.75	1.25	-1.75	-3	-0.5	-4.75	-3				0.6	3.5	0.5	0.75	2.75	-2.75	-0.75	1	0.5	0.25				-40	0.0136408	0.00725191	-0.011218	0.0277784		-0.0676873			-0.00604684	0.0371984
			0.64	-2.25	-3.5	-2.25	1.5	-1.5	-2.25	-2.25	-3.25	1				0.64	3	-0.75	0.25	1.25	-0.75	-1.25	-1.75	2	0.75				-20	-0.128411	-0.0608386	-0.131408	-0.024795		-0.126639			-0.0944184	0.0488286
			0.68	-2.25	-4.5	-5	0	-1.75	-3.25	-3.5	-2.5	2.75				0.68	1.5	1.5	0	-0.25	-0.25	-1.5	-4.75	2	-0.25				0	-0.194262	-0.0890411	-0.18109	-0.187383		-0.156479			-0.161651	0.0430186
			0.72	-0.75	-3	-2.5	-1.75	0.75	-1.25	-3	0	0				0.72	0	3.25	1.5	-0.75	1	-1.5	-1.25	3.5	0.5				20	-0.262936		-0.291666	-0.213277		-0.224164			-0.248011	0.0360721
			0.76	-1	0.75	1.5	-1.25	1.5	3	-0.75	2.25	-2.75				0.76	-0.5	3.25	3.5	0.5	2.5	1	2.5	4.5	0.75				40	-0.349955	-0.174053	-0.503199	-0.337572		-0.363173			-0.34559	0.116895
			0.8	0.5	3.5	0.5	-0.5	0	3.75	-0.5	2	-3.25				0.8	2	2.75	0.25	1	3.75	4	0.75	1.75	2				60	-0.439795	-0.218372	-0.339747	-0.453851		-0.587334			-0.40782	0.137742
			0.84	-0.75	2	-2.75	0	-1.25	0.5	-2.75	4	-1.25				0.84	3.25	1.25	-3.5	0	1.5	4.25	-2.75	1	4
			0.88	-1.25	-0.5	-2	-1	-1.5	0	-3.75	2	1				0.88	1	-1.5	-2.75	0.75	-1.25	2.25	-2	2	6.25			Figure S4D	Voltage-Current relationship
			0.92	-1.75	-2.5	-0.75	-1.5	-1.25	1	-3.75	-3.75	0.25				0.92	-0.75	-1.5	-0.5	0.25	-1	1	1.25	-1.25	4.5				F136Y V-jump plus ucph (absence of Ser)
			0.96	-1.5	-5.25	2	1.75	0	-0.25	-1.5	-4.5	-1.75				0.96	-0.5	-1.75	2.25	-0.5	3	0.5	3.25	-1	3
			1	0.5	-7	0.25	1.25	0.25	-1.25	-2	-1.25	-3.25				1	0.5	-3	0	0	2	1.5	1.75	3.25	1.25				Relative Current (n=13)
			1.04	0	-2.75	-1.25	-2	1.25	-1.25	0	-1	-0.5				1.04	1.5	-0.75	0.5	-1.25	-1.5	1.25	2.25	2.75	2.75				Voltage (mV)	exp1	exp2	exp3	exp4	exp5	exp6	exp7	exp8	exp9	exp10	exp11	exp12	exp13		ave	std
			1.08	-1.5	-0.25	-0.5	-2.25	0.75	-2.75	2.5	-0.25	3.25				1.08	0.5	1.5	2.75	-1	-1	1.5	3	3	3.5			no UCPH	-100		1.7013	1.12058	0.556356	0.711208	0.825292	0.472614	0.346371	0.571427	1.50723	0.43758	0.824996	0.468269		0.824996	0.468269
			1.12	-2.5	-2.25	-3.25	-0.5	0.75	-3.5	2.25	1	1.5				1.12	-0.75	0	-0.75	-1	2.5	1.25	2.5	3.5	0.5				-80		1.13636	0.659163	0.397443	0.517243	0.531614	0.269777	0.291087	0.268235	0.952312	0.307592	0.533083	0.302422		0.533083	0.302422
			1.16	-1.75	-5.25	-2.75	-1.25	0	-2.75	3	-0.75	-1.5				1.16	1	-0.5	-2.25	-2	3	2.5	0.25	1.5	0.75				-60		0.5	0.281349	0.205439	0.377155	0.258736	0.103448	0.176382	0.187689	0.4263	0.144144	0.266064	0.130043		0.266064	0.130043
			1.2	1.25	-3.25	-1.25	-1	-2.5	-0.5	2.25	-0.25	-1.5				1.2	3.25	-0.75	-0.75	-0.75	2.5	1.5	0	0.5	1.25				-40		0.123377	-0.128617	0.023262	0.0129322	0.0299496	-0.0263707	-0.0165474	-0.0159582	-0.020231	-0.00643515	-0.00246393	0.0623462		-0.00246393	0.0623462
			1.24	-0.5	2	2.25	0.5	-2.25	2.5	0	0	0.5				1.24	2	1.75	3.25	2	3.75	0.75	4	0.5	1				-20		-0.324675	-0.390675	-0.156291	-0.340519	-0.214642	-0.192696	-0.22941	-0.210485	-0.387284	-0.17117	-0.261785	0.0897728		-0.261785	0.0897728
			1.28	-0.75	2	2.25	3	-2.25	4.25	-0.75	-0.75	0.75				1.28	1.75	2.5	3	4	1.75	0.75	1.75	-1.75	1.75				0		-0.467532	-0.662379	-0.355177	-0.558192	-0.458402	-0.340772	-0.411809	-0.390578	-0.595375	-0.369368	-0.460958	0.11032		-0.460958	0.11032
			1.32	0.5	0	2	1.25	-4.25	3.25	0.5	-2.5	0				1.32	2.75	2.25	2	4	-1.5	2.5	-1.5	-5	3.5				20		-0.597403	-0.734726	-0.573394	-0.926728	-0.654741	-0.598377	-0.620911	-0.504558	-0.784684	-0.630628	-0.662615	0.122021		-0.662615	0.122021
			1.36	0.75	-0.75	2.5	-1.75	-3.5	0.5	-1	-2.75	-1.25				1.36	2.75	2	0.75	0.25	-1.75	3	-1.5	-5	1				40		-0.597403	-0.909966	-0.785386	-1.25646	-0.902662	-0.849897	-0.82437	-0.634497	-0.781795	-0.804373	-0.834681	0.17983		-0.834681	0.17983
			1.4	-1.25	1	-0.5	-3.5	-1.5	1.25	-2	0.25	-3.25				1.4	1	4	0.25	-1.5	-1.5	4	-0.25	0	-1				60		-1	-1	-1	-1	-1	-1	-1	-1	-1	-1	-1	-1		-1	-1
			1.44	-3.5	1	-3.75	-4.25	-1.25	-0.5	-0.5	1.5	-0.25				1.44	-1	1.5	-1.75	-2.25	1.25	2.75	-0.25	3.25	0.75
			1.48	-0.25	-1.5	-4.25	-3.75	1.75	-0.5	0	2.5	-0.5				1.48	0	-2	-1.5	-1	5.75	0.25	-0.5	3.75	0.75				-100	0.160775	0.435779	0.331115	0.0993888		0.314405	0.0813068					0.237128	0.14377		0.237128	0.14377
			1.52	0.25	-1.75	-1.25	-2	2	0.25	-1.5	0.75	-2.25				1.52	-0.75	-0.75	1.25	0.75	5.75	0.25	1	4.25	-0.5			plus UCPH	-80	0.123797	0.295871	0.236273	0.0486806		0.231667	0.136019					0.178718	0.0912033		0.178718	0.0912033
			1.56	-0.5	0	1.25	-1	-1.5	0.5	-1.25	-1	-2.5				1.56	-2.75	2.5	3	2	1.75	2.25	1.5	0.75	-1				-60	0.0241163	0.167102	0.114809	-0.00202807		0.103047	0.105623					0.0854449	0.0627055		0.0854449	0.0627055
			1.6	1.25	0.25	0.25	-2	-1	-0.75	-1.5	-1.25	-1.25				1.6	0.5	4.75	0.75	1.25	0	1	3	-0.25	1				-40	-0.0112543	0.0147432	0.0207983	-0.0486825		-0.0462582	-0.019758					-0.0150686	0.0293748		-0.0150686	0.0293748
			1.64	1.75	0	-0.75	-2.5	-1.25	-3	-2.25	-4.25	-1.5				1.64	1.25	2.25	1.75	-0.75	-0.5	1.25	3.25	-1.25	1.75				-20	-0.045017	-0.129424	-0.101498	-0.0953338		-0.166981	-0.0957453					-0.105667	0.0405581		-0.105667	0.0405581
			1.68	-1.25	1	-2.25	-0.75	-2.25	-3.75	-2	-6	-1.75				1.68	0	-0.5	1.25	-2	0.25	-0.75	3.25	-0.25	-1				0	-0.0980728	-0.298165	-0.197172	-0.200815		-0.213239	-0.156536					-0.194	0.0661552		-0.194	0.0661552
			1.72	0.25	1.75	-3.25	-0.25	-4	-1.5	-0.5	-2	-2.25				1.72	0.25	0	-0.5	-0.25	-0.75	-1	2.5	2.5	-2.5				20	-0.0755643	-0.430866	-0.274542	-0.411766		-0.153441	-0.222645					-0.261471	0.14085		-0.261471	0.14085
			1.76	1.25	3.5	-4	-0.75	-4	1	1.5	-3.5	-3.5				1.76	-0.25	3	-4.25	0.5	-0.25	0.5	2	-0.75	-0.25				40	-0.0819953	-0.624508	-0.376871	-0.624748		-0.164722	-0.0759864					-0.324805	0.256512		-0.324805	0.256512
			1.8	-1.5	3	-0.75	-0.5	-1.75	-1.5	1.75	-2.25	-3				1.8	-0.75	3.75	-1.75	0.25	-0.25	2.25	1	-1.5	-0.5				60	-0.0739565	-0.864024	-0.376039	-0.780937		-0.246708	-0.288754					-0.438403	0.314431		-0.438403	0.314431
			1.84	-5.75	1.75	3.25	-0.75	2	-2	-0.25	0.75	-2.5				1.84	-2.75	2	5.25	0.75	-0.25	1.75	-0.5	1.5	0.5
			1.88	-6.5	-0.5	4.5	-0.5	0.25	-0.75	0	2.25	-6				1.88	-2	0	6.75	1.25	-3	-0.5	1	3.75	-0.75
			1.92	-3.25	-2	1.75	-0.5	-0.5	-0.5	-0.75	1	-3.5				1.92	-0.25	-2.75	3.5	2	-4.25	1.75	2.75	3	0.5
			1.96	-2	-3	-0.75	0.5	0	-2.25	-0.75	-1.5	1				1.96	1.25	-2.75	0.75	2	1	0.25	3.5	0.75	2.5
			2	-2.25	-1	0.5	-0.5	-0.75	-0.25	-1.5	-1.75	0				2	0.5	1.75	0.5	0	3.25	-0.25	2	0.5	0.25
			2.04	-1.25	0.25	1.5	0.75	1	-1.75	-3	-1.5	0				2.04	-0.75	3.75	2.25	1.75	2.25	0	-1.5	2	-1.25
			2.08	1.25	-0.5	1.25	1.5	2.5	-6.25	-5	-3.5	1.25				2.08	1	2.5	3.25	1	1	-1.5	-2	-0.25	-0.25
			2.12	2.25	-3.25	-1.5	-0.75	1.5	-5.5	-4	-6	1.25				2.12	1.5	-1	2.25	-1.5	1.25	-2.25	-1.75	-3.25	0.75
			2.16	1.25	-1	-3	-3	-0.25	-1	-1	-3.5	1				2.16	0.25	-0.75	1.25	-0.5	2.5	-0.25	-0.25	-2	2.75
			2.2	0.25	-1	0	-2	-1.25	4	0.25	-1.5	-0.25				2.2	0	1.75	3.75	0.5	1.5	2	0.25	0	2.25
			2.24	2.25	-3.75	-1	-2.25	-3.5	3.75	0.75	-1	-0.75				2.24	5	0	0.5	-0.5	-1	2.25	0	-0.75	2.25
			2.28	1.5	-4.25	-2	-3.25	-3.75	-0.5	0.75	3.25	-0.25				2.28	5.5	0.25	-1	-1.5	-0.5	0.25	0	2.25	1.75
			2.32	-3.5	-3.5	-2.75	-0.5	-2.25	-0.5	0.75	1.5	-0.25				2.32	1	0.5	-1.25	-0.75	0	-0.25	1.5	3	1.5
			2.36	-2.5	-2.5	-2	-1.25	-1.5	1.25	-0.25	-2.75	-0.25				2.36	0.75	-1	-1	-0.25	0	0.25	0.5	-0.25	-0.25
			2.4	1	-0.25	-1	-1	-1	0.25	-1.75	-3.5	-0.5				2.4	2	0.25	0	-1	-0.5	-0.5	0.5	-2	-1
			2.44	-0.5	-2.25	1.5	0.25	1	-3.25	-1.25	-1.25	-1.75				2.44	2.25	1.5	0.75	-1	0.75	-1.5	2.75	0.75	0.5
			2.48	-0.75	-4.75	0.75	0.5	1.5	-3.25	0.5	-1.75	-1.5				2.48	2.5	1.75	0.25	-0.5	3	-2.75	3.75	-0.75	1.5
			2.52	-0.75	-5	-1.25	1.5	0.5	-1.5	0.75	-3	-2.5				2.52	2.5	0.75	-0.25	1.5	1.5	-1	1.75	-1	0.25
			2.56	-1	-1.5	-2	1.5	1	-0.75	0.75	-3.25	-2.25				2.56	1.5	-0.75	-1	3.75	-1.25	1.25	-0.5	-1.25	0
			2.6	-1.5	1.5	-1	-1.25	2.75	1	-0.75	-0.25	-2.25				2.6	-0.75	-1.75	-2	-0.25	-2.75	3	-2.25	-0.25	0.5
			2.64	-1.25	0.75	0	-2.75	1	2.75	-2	0.5	-1.25				2.64	-2.75	-4.25	-0.5	-4	-3.5	1.25	-1.75	0.5	0.75
			2.68	-2.5	0.5	0.5	-0.25	-1.25	0.75	-2.25	-1.25	-0.5				2.68	-0.25	-3.75	2.25	0.75	-1.25	1	1	-0.25	1
			2.72	-0.25	1	0	2.5	-1.5	-1.75	0	-2.25	-1.5				2.72	1	1.75	2.25	4	1.5	2.75	2.5	-1.25	1.25
			2.76	0	-0.75	-0.5	3	1	-0.75	0.75	-3	-0.75				2.76	0	1.75	2	3.25	3.75	3.5	4	-0.25	0.75
			2.8	-2	0	-1.25	0.75	0.75	2.5	0.25	0.75	0.5				2.8	-1	-0.5	1.5	0	2.75	1.75	2	3.25	-0.5
			2.84	0.75	4.25	0	0	-3	2.75	-0.5	3.25	-0.75				2.84	1.5	1.25	0.25	2.75	0.75	0.75	-1	3.25	-0.5
			2.88	1	5.5	0.5	1.25	-4.75	2.5	2	2.25	0.75				2.88	2	2.5	0.25	5.5	-1.25	1.5	0.75	1.25	2
			2.92	0.25	3	-1	0.25	-2.5	-0.75	1	0.75	0.25				2.92	0.25	1	0	3.25	-0.75	0	2	1.75	2
			2.96	2.25	2.25	0.25	-0.75	-0.5	0	-0.5	0.5	1.25				2.96	-2.25	1.75	0.75	1.75	-1	-1	1.5	1.5	1.5
			3	1	1.5	3	0.5	1	1.5	-0.5	-2	2				3	-4.25	3.25	3	0.5	0	-1	0.25	1.25	3
			3.04	-2	0	1	-1.5	0.5	0.75	-0.5	0.5	0				3.04	-3.25	2.75	2.5	-1.25	1.25	-0.25	-0.5	4	2.25
			3.08	-2.25	-0.25	0.5	0	-0.75	0.25	0.25	1.25	-2				3.08	-2.25	1.75	3	-1.25	1.5	1.75	-0.75	4.5	1.75
			3.12	-1.5	-0.75	0.25	-0.5	-2.75	0.5	0.25	0.25	1.25				3.12	-1.75	-1.25	2.5	-2.5	-0.25	1	-2.5	2.25	3.5
			3.16	0.75	-1.25	-0.75	0	-2	-0.25	3	-0.75	0.5				3.16	0.25	-1.5	2	-3.25	-3.25	-2	-0.25	-0.5	2.25
			3.2	1.75	-2.25	0.25	0.5	-1.5	-1	3.75	-0.5	0.75				3.2	0.5	-0.75	1.75	-1.5	-3.75	0.25	4.25	-1.75	-0.75
			3.24	1	-2.75	0.75	2.75	-1	-2	1.75	1.25	0.25				3.24	2	1	0.25	3	-0.25	2.25	3.75	-0.75	-2.25
			3.28	-0.75	-1.5	2.75	3	1	-1.5	-1.5	0.5	-1.5				3.28	0.25	1	1.5	3.25	3.25	1	0.25	-1	-0.75
			3.32	-2	0.25	4.5	0.25	4	2.75	-2	0.5	-1				3.32	-2.5	1.5	4.5	1.5	2.5	1.25	-1.75	-1.5	0.5
			3.36	0.75	2.75	4.25	-2	3.5	3	-1.25	0.75	-1.25				3.36	-1	2	3.75	0	2	0.25	-0.75	-0.25	1.25
			3.4	-0.75	3.75	2.75	-2.5	-1	0.25	0.5	0.5	-1.5				3.4	-1	1.5	1.25	0	-0.25	-1.75	1.5	1.5	2.25
			3.44	-2	-1	-0.75	-3	-2.25	0	-0.25	0.75	-2				3.44	-2	1	-2.75	-1.75	-1	-0.5	1.5	2.25	2.75
			3.48	-1.75	0.75	-2	-3	-1.5	0.25	-1	0.25	-3				3.48	-2	1.75	-4.75	-3.5	1.25	-0.5	1	1	-0.75
			3.52	-0.5	1.5	0.5	-0.5	0	0.5	-0.25	0.25	-1.5				3.52	-0.25	0.5	-1.75	-2.75	1.25	0	0.25	-0.75	0
			3.56	0.75	-0.25	1.75	-0.25	3.25	0	0.25	1.25	2				3.56	3.25	0.25	-0.75	-1.75	0.5	0	1	-0.5	2.5
			3.6	-1.75	-1.25	2.5	0.25	2.75	-0.25	1.5	1.5	0				3.6	4	0.25	1.75	-1.75	0.25	-2	1.5	-0.25	-1
			3.64	-2.75	-0.5	1	0.75	1	0.5	3.75	1.25	-1.25				3.64	2.75	2.5	2.25	-1	1	-1.25	0.75	-0.25	-1.25
			3.68	0.5	0.25	-1	1.25	-0.75	0.75	3.25	-0.25	1.75				3.68	2.75	4.25	1.75	1	1.75	1	-0.25	-0.75	1.5
			3.72	2.5	0.5	-1.75	-0.5	0.75	0	0.5	-3.25	2				3.72	0.75	4	1.5	1.5	1.5	1.75	0.5	-1	0.75
			3.76	2.25	0.5	-2.5	-0.25	-0.5	-1.25	-2.25	-0.75	1.5				3.76	1.5	1.5	0.75	0	-0.5	0.75	0.75	1	0
			3.8	0	1.5	-2	2	-1.25	-0.75	-1.25	5	-0.5				3.8	-0.25	-1	-0.5	0.5	-0.25	1.5	-0.25	4.25	-2.75
			3.84	2.5	4.75	0.25	-1.25	1.25	1.5	1	3.25	-1.75				3.84	-0.25	1.25	0.75	0	2.75	2	-1	2.75	-5.75
			3.88	6.75	3.75	2.75	-2.25	1.5	4.5	1	-0.75	0.5				3.88	-0.75	2.5	2.5	2	3.75	1.75	1.5	0.5	-3.75
			3.92	5.5	-1.25	4.5	1.75	0.75	4.75	-0.25	-1	4				3.92	0.5	-1	4.25	4.5	3.25	0.75	1.5	-1.5	1
			3.96	-0.25	-1.25	4.25	2	0.5	1	1.5	-0.5	3.25				3.96	0.25	-4.25	4.25	3.5	3.25	0.5	2.25	-0.5	3
			4	-2.25	-0.5	1	3	1.75	0.75	0	0	-1				4	1	-2	3	4	0.5	1	0.25	0.25	0
			4.04	-0.5	-1.5	-2.5	3.25	0.5	3	2.75	-0.5	-0.5				4.04	1.75	0	-0.5	2.75	-0.75	3.25	2.25	-2.5	0.25
			4.08	0	0.5	-0.5	3.25	-1	2.75	2	0.5	2				4.08	1.75	1	-0.5	2	0.25	2.25	1	-0.25	2.25
			4.12	-0.75	0.5	3	3.25	-0.75	1.5	0.75	1.25	2.75				4.12	0	3	0.75	1.5	2	0	-1.5	3.25	2.5
			4.16	0.5	3.75	2	1.25	1.75	0.5	2.75	-1.75	-0.25				4.16	-1.75	5	0	0.75	3	0.5	1.25	2.75	2.25
			4.2	-0.5	3.25	1.25	0.25	4.5	-0.5	3.5	-0.5	-1				4.2	-2.25	5.25	0	-0.5	0.75	0.75	3.25	-0.5	3.5
			4.24	0.25	0.75	1	1.75	5.5	-1.25	-0.75	1.25	-2				4.24	-0.75	3	2	-0.25	1.5	1.25	0.25	-2.5	0.75
			4.28	1.25	1	-1	3	4	0.75	-2.25	1.25	1.75				4.28	1.5	0.5	1.75	4	4.25	2	-3	-1.25	1.75
			4.32	-1.25	4.5	0	4.75	3.25	1	0	0.25	2.25				4.32	1.25	1	0.5	5.25	3.5	1.75	-1.75	0.25	3.75
			4.36	-2	2.75	1.5	1	1	0.25	1	-1.5	1.75				4.36	0.75	2.5	-0.25	0.25	0	1.25	2	1.25	4.25
			4.4	-1.25	0.5	0.75	0	-0.75	-1.25	0	-1	1				4.4	0.75	2.75	-1.5	0.25	0	-1.75	4.5	0.75	1.5
			4.44	1	1.25	1.5	1.25	1.25	1.25	-1.75	1.5	2.25				4.44	1.75	3.25	-1.25	1	2.5	-0.5	4.5	0.5	1.25
			4.48	1.75	0.75	4	0.75	2	1.5	1	2	0				4.48	1.5	1.75	2	-0.75	3.25	-0.25	3.5	1.25	0
			4.52	3.5	0	3.25	-0.5	-1.25	-0.5	3	1	2				4.52	1.25	1.25	2.25	-0.25	-1.25	-2	1	0	0.75
			4.56	0.5	1	-0.5	-2.5	-5.25	0.5	5	-1.5	5.5				4.56	-0.5	0.5	0.5	-3.75	-4.75	-0.25	0	-1	2
			4.6	2	0.75	-0.5	0.25	-2	2.5	5.5	-1.5	3.75				4.6	-1	0	-0.25	-3	-1.25	2	1.25	1	2.75
			4.64	3.5	-0.25	0.75	0.25	3.25	0	2.25	1	2.25				4.64	0	0.75	0	0.25	4.25	-0.25	1.25	4	4.5
			4.68	2.5	-0.5	1.5	-1	5.5	-0.5	2.25	3.75	3.5				4.68	-0.25	0.75	1	1.75	4.5	-0.25	1.25	6.5	3.75
			4.72	-0.75	-2	1	0.75	4	1.25	4.75	5	3.25				4.72	-0.5	-0.75	1	2.5	2	2.25	3	6	2
			4.76	-3.5	-2.5	0.75	0.5	2	1.75	2.25	3	1				4.76	0.5	-2	2	0.75	3.5	1	4.25	3	0.5
			4.8	-3	0.75	0.25	0.75	-0.75	2.75	0.25	0	0				4.8	2.25	-0.25	2.5	1.25	2.5	-0.5	2.25	0.75	-1
			4.84	0.5	1.25	-2	2.5	0.5	4.5	-2.5	0.25	1.5				4.84	2.75	1.25	1.25	0.25	0.25	1.5	0.75	0.75	-1
			4.88	1	2.5	-2.25	3	2.25	2.5	-2.75	3	0.75				4.88	0.5	2.25	0	-3.5	-1.5	0.25	0	0.25	-0.5
			4.92	1	0	0.5	0.25	2.75	-0.25	-0.25	4.25	0.75				4.92	1.25	2.25	1.5	-2.25	0.25	-0.5	0.25	-0.75	1.75
			4.96	1.5	1	0.75	-0.5	2.5	2.75	0.5	0.75	1.25				4.96	2.25	4	1.25	1	0.5	2.75	-1.25	-1.25	1.5
			5	3	2.75	-1.5	1.5	-0.5	2.5	0.75	-0.25	3				5	5.5	3.5	-2	1.5	-1.5	3	-1.75	-0.25	2.75
			5.04	2.25	2	-1.75	0.25	-1.25	-0.5	2.25	0.5	3.75				5.04	2.75	0	-2	0	-1.75	1	0.75	2.25	3.75
			5.08	0.5	0.5	1.75	-0.5	1.25	1.5	-0.75	-0.25	1				5.08	1	-4	0	1	0.75	2.25	1	2.5	0.5
			5.12	-0.5	-1	1	1.75	1.5	-0.25	-1.5	0.5	-1				5.12	1.25	-2.5	0.75	2.25	1.25	2.5	1.25	2.75	-2.25
			5.16	1.25	-0.5	1.75	2.25	-1.75	-1.25	0.25	1.75	0.25				5.16	1.5	-1	0.5	1.75	-0.75	1.75	1.75	3.25	-4.75
			5.2	3	1.5	2.25	0.75	-1	-1.25	1.5	-0.25	0				5.2	3	1	1.25	0.5	0.25	-1	1.25	0.75	-3.25
			5.24	1.75	3.75	1.25	-0.25	2	0.25	-0.5	-2.25	-0.25				5.24	3.5	1.25	0	1.75	2	-1.75	-0.25	0	0.75
			5.28	-1.25	5	1.75	0.75	2.5	1.25	1.5	0.25	0				5.28	1.25	2	-0.75	3.75	1	-0.75	-0.75	2	3.5
			5.32	1	1.5	1.75	1.25	2.5	2.25	3.75	1.75	2				5.32	0.75	1.5	-0.75	2.5	-0.75	0.25	0.75	1.5	4
			5.36	3.5	-2	0	4.25	2.25	-0.5	0	1	-1				5.36	1.5	0.25	1.25	1.75	1.25	-0.75	1.25	-0.25	-0.5
			5.4	1	-3.25	1	4.75	1.75	-2.75	-1.5	0.75	-0.25				5.4	-0.75	-3.5	4.25	4	0.25	-0.75	1.75	1.5	-1
			5.44	0.25	-2.5	2	2	0.75	-1	-3.5	0	1.75				5.44	-0.75	-4.5	2.75	4.25	-0.5	1.25	0.25	2.25	1.5
			5.48	2.5	-0.5	1.5	-1	-0.25	0.5	-3.5	1.25	-1.5				5.48	1.75	-2.5	-0.25	2.25	-0.5	1	-1.5	2	-1
			5.52	3	1	2.5	-2	-0.5	-0.5	-1.75	1.75	-2				5.52	2.25	-1.75	0.25	-1	-1	-0.25	0	-0.25	-0.75
			5.56	4.25	0	3.75	-0.5	-1.75	1.75	2.75	1	-1.5				5.56	3.25	-2	3.25	-2.75	-1	0	2.5	-0.75	1
			5.6	5.75	0	1	0	1.75	2	5.5	1.5	-0.25				5.6	4	-0.5	1.75	-3.25	2.75	2.5	3.75	0.25	1
			5.64	2.25	1.5	-1.75	1.25	2.25	1.75	4.25	1.5	2.25				5.64	0.75	3.75	0.75	-3	3.25	3	4	1.5	0.5
			5.68	-1	1.5	-3.5	0	0.75	1.75	0.5	2.25	3				5.68	-2.25	6	0.25	-1	0.5	2.5	0.25	0.75	0.75
			5.72	-1.5	3	-4.75	-4	0.5	2	-1.5	0	1				5.72	-0.75	5.75	1.5	-0.75	-1.75	1.25	-3.5	-1.25	-0.75
			5.76	-0.25	4.25	-1.5	-4.25	1.75	4.5	-2	-1.5	-0.25				5.76	0.25	0.25	1.75	-2	-1	-1.25	-2.5	0.75	-1
			5.8	0.5	2.75	0.25	-0.5	1.75	3	-2.25	-1.75	-1.5				5.8	-0.5	-1	-1.25	-1	1.5	-2.25	-0.75	1	-1.25
			5.84	0	0	1.5	4	2.25	1.5	0	-0.5	0				5.84	0	-0.5	-3	1.5	2	-2.25	2.25	0.75	1.25
			5.88	0.25	-1.5	-0.75	4.5	2.5	2.5	2.5	-0.25	1				5.88	2.25	-0.25	-0.25	1.75	2.75	-1	3.25	1.75	5.75
			5.92	1.25	1.5	-1.25	2	2.25	2.5	2.75	3.75	-2				5.92	2.25	1	2.75	1.75	0.75	0.5	2.5	3.75	3.5
			5.96	2.5	-0.5	2.25	-0.75	1	-0.25	2.25	4.5	-0.25				5.96	0.25	0.5	5.75	1.75	-0.5	-0.5	2.25	2.5	0.75
			6	4	-1.75	4	-0.75	0.25	0	1	1.25	3				6	0	1.25	2	2.25	1.75	1.25	-1	2	0.5
			6.04	2.25	-2	2.75	0.5	2	1.5	0	-2.75	2.5				6.04	-0.25	1	-2	0.5	2	3	-1.75	-1	0.25
			6.08	-0.25	-2.25	0	-1.25	2.25	2.25	1.25	-1	0.25				6.08	-0.25	0	-1.75	-2	2.25	2	-1	0.5	3.5
			6.12	-2.75	-0.75	1.25	-4.75	-1	0.25	-0.5	1	0.75				6.12	-0.5	-1.5	0.5	-3	-1.75	0.75	1.25	1	5.75
			6.16	-3.75	2.5	2.75	-2.25	-1	-0.5	-1.25	2.5	2.25				6.16	-2.25	0.25	2	1	-0.75	0.25	3.25	0.75	4.25
			6.2	-1.5	2.25	1	-0.25	0.75	-0.5	1.25	2	1.25				6.2	-2	0.5	1	0.5	0	1	2.5	0	1.5
			6.24	1.5	3.5	-0.75	-2	0	0.5	2	-0.25	0.75				6.24	-2	2.75	-2.25	-2	-1.75	2.75	1.5	-0.5	-0.5
			6.28	2.25	1.25	-1.5	0	-1	-2	2	1	-1.5				6.28	-1.5	1.25	-3	-1.5	-0.75	1	0.5	0.75	-0.25
			6.32	0.75	-1.5	-0.25	1.75	-2.25	-3.75	1.5	2.25	-0.25				6.32	0.75	0.5	-1.5	-2	0.75	-0.75	0.75	-0.5	-0.75
			6.36	-0.25	0.25	-1	2.5	-1.75	-1	0.75	3.5	1				6.36	1.5	0	0	1	-0.75	-3.5	0.25	0.25	-1
			6.4	3	1.5	-1.75	3.25	-0.25	0.5	-0.75	2.75	-1.75				6.4	3	-0.75	0.75	3	-0.25	-4.25	-0.5	2.25	-2
			6.44	2.75	2.25	0	3.25	-1.25	1	-0.5	-0.75	-1.75				6.44	2.25	1.25	-0.75	4	0.5	-1.75	-0.25	2.75	0
			6.48	0.25	-0.25	3.5	2.25	-2	3.75	0.75	1	-0.25				6.48	1.5	1.25	0.5	3	-0.5	5	1.75	1.25	-1.75
			6.52	1.25	-4	2.75	0.75	-1.25	3.25	0.75	3	1.75				6.52	2	-1	1.5	1	-0.75	6.25	1.25	2	-1.5
			6.56	2.5	-2.5	3.5	0	0	0.25	1	0.25	3				6.56	3	-1	1.5	-1	-0.5	1.25	0.5	0.25	0
			6.6	3.25	-1.5	2.75	-0.5	3.5	-0.5	1.25	0.25	1.25				6.6	3	-1.25	1	-2.25	0.75	-2.5	0.75	-0.75	0.25
			6.64	0.25	-0.5	0.5	0	4	0	1.5	-0.5	-0.5				6.64	1.75	-1.25	0	-0.5	-1.5	-0.25	2.25	-1	0.75
			6.68	-1.25	1.5	-2.75	0	1	-2	-1.25	-0.5	-1.25				6.68	0	3	0.25	-0.5	-2.25	0.25	0.75	0	0.75
			6.72	-0.75	3.25	-3.25	2.75	-0.75	-2.5	-1.75	-1	2.75				6.72	-2	5.5	1.75	-0.5	-1.25	1	0.25	1.75	1
			6.76	0.5	4.25	-0.25	3.75	-1.5	-0.75	-3	-0.25	5				6.76	0	3	2.75	1.5	0.25	2.25	-1.25	1.75	0.5
			6.8	-0.25	3.25	1.75	0.25	0.75	-0.75	-1.75	0.75	5				6.8	0.75	0.5	1.5	0.5	1.5	1	-2.75	0.25	-0.25
			6.84	-0.75	3	1.25	0.25	0	-1.5	-0.75	0.5	1.25				6.84	0	0.75	2.5	-1.25	1.25	-0.25	-1.5	0	-0.75
			6.88	2	1.75	1.5	-1.25	-2.25	-1.75	3	0.5	-0.25				6.88	1.75	-1	1	-2.5	-1.25	-2.5	0.25	0	-1.5
			6.92	2	-0.25	0.25	-1.75	-0.25	-0.5	5	-0.75	-0.5				6.92	0	-1.75	-3.25	-2	-3	-3.25	1	-2.25	-2.75
			6.96	0.5	-0.5	0	1	3.75	3.25	3.5	-2.5	0.5				6.96	-2.5	-1.75	-3.25	-1.25	-0.5	0	2.25	-3.75	-1.25
			7	1	0.25	0.5	3.75	2.5	4	2.75	-2	0				7	-0.75	-1.5	-0.75	0.5	0.75	1.75	3	-2.25	-0.25
			7.04	1.75	2.25	3.75	3	-1.75	1.25	3.5	-1.25	-1.25				7.04	2.25	-0.5	2.25	2	-0.75	-0.5	2	-1.5	1.75
			7.08	1	-0.25	2.25	1.25	-2.25	1.25	1.75	1.25	-0.5				7.08	3.25	0.75	0.5	1.5	-0.25	-1.75	0.5	-1	2.25
			7.12	-0.25	-3	-1.5	2	2.25	2.25	-0.5	0	0.5				7.12	2.25	-0.5	-2.25	2.25	2.75	-0.5	-2.5	-2.25	0.5
			7.16	-1	-5	0.5	-0.25	4.5	0	-0.25	-1.75	2.5				7.16	-0.5	-2.75	-3	1.5	1.75	-0.5	-1.5	-1.5	1.25
			7.2	-2.5	-1.75	3.25	-2	1.75	-1.5	4	0.25	1.5				7.2	-2.25	-2	-2	0.5	-0.25	-1.25	4.25	1.5	0.5
			7.24	-3	0.25	3.25	-1	-1	0.5	3.75	0.75	1.75				7.24	-2.75	0	-1	-1	-2.25	-0.25	4.5	2.75	1.25
			7.28	-1.75	-0.25	0	-1.75	-4.75	0.25	2.5	2.5	3				7.28	0.25	0.75	1.25	-1.75	-3.75	-0.75	2.75	3.25	1.25
			7.32	0.25	1.5	-0.5	0.25	-3.5	2.5	0.75	2.5	1				7.32	2	3	2	0.5	-1.75	-2.5	0.75	0.75	-0.25
			7.36	0.75	2.5	2	1.75	-1.25	3	0.5	0.75	-1.75				7.36	2	1.75	3.5	-0.5	-1.75	-0.5	0.5	-2.25	0
			7.4	-0.5	1	1.75	-0.25	1.25	0.5	2	1.75	-2.75				7.4	1.5	-2	2.25	-1.75	-2.5	0.25	-1	-2.5	-1.75
			7.44	-1.25	-0.75	-0.25	-0.25	4	-3	2	1.75	-0.5				7.44	0.5	-2.75	0.25	0.5	-1.5	-1.25	-1.5	-1.25	-2
			7.48	-0.5	-1	0.25	-1	1.25	-1.25	-0.5	1.25	-0.75				7.48	-1.75	-2	1.75	-0.5	-1.25	-1.25	-1	0.25	-2.25
			7.52	1	-1.75	3	0	-2.5	1.5	-1.25	-1.5	0				7.52	-3.25	-0.75	1.25	-1	-3	0	0.75	0.25	-2.25
			7.56	1	0.5	-0.25	-1.25	-3	1.75	-1.5	-2	2.5				7.56	-2.75	3	-0.75	-2.25	-3.5	-0.25	-0.25	0	1
			7.6	2.25	2.75	-3.75	-0.25	-1.75	-0.25	0	-0.75	3.25				7.6	-2.5	4	-3	-1.5	-1.25	-0.75	-2.25	-0.25	3.5
			7.64	2.75	2.5	-4.75	-0.25	0.75	-0.75	-1.5	0.25	1.5				7.64	-2.5	2	-4	-1.5	0.75	-1.5	-4.25	-1.5	2
			7.68	0	-0.5	-1.75	0.5	0.75	2	-1.5	1.75	1.75				7.68	-2.25	-0.75	-3	-0.5	1.25	-1.25	-3.25	1.25	0.75
			7.72	-1	-1.75	1.75	1.5	-2.25	2	2.25	2	1.5				7.72	-1	-2.25	0	2	-0.25	1	-0.5	3.5	1.25
			7.76	1.5	-2.25	2.75	-0.25	-3.25	3.75	5	2.5	0.5				7.76	-1	-1.75	-1.5	0	-2	1.5	1.25	2.5	-1.25
			7.8	2	1.5	0.25	-3	-0.5	3.5	5	4	1.25				7.8	-1	-0.75	-3.75	-3	-2.5	3.75	0.5	2	-0.5
			7.84	-1.75	2.5	-1	-0.5	2.25	1	3.5	3.25	0.25				7.84	-0.5	0	-2.75	-4	-1.75	3	-0.5	1	4.25
			7.88	-4.25	-0.5	-1	0.25	3.75	0.25	1.25	0.75	-3.75				7.88	-1.5	0.5	-1.25	-2	-2	0	0	-0.5	1.75
			7.92	-4	-2.75	-2.5	1.25	3.75	0.25	-2.25	0.5	-4.25				7.92	-1.5	-0.5	-0.75	2.25	-3.5	-1.5	-2.75	0	-3.25
			7.96	1	1	-0.25	2.25	1.25	-3.5	-4.25	1	-1.75				7.96	0.75	0	1.25	4.5	-3	-2.75	-5.5	2	-4.25
			8	2.75	3.75	1.25	-1.25	-4.5	-4.5	-2.5	0	-0.75				8	3.75	-0.75	2.75	1	-2.5	-3.75	-2	2.5	-3.25
			8.04	4	4.25	0.75	-2.5	-3.25	-4	-1.5	0.25	-1				8.04	3	-0.25	1.5	-1.25	-0.5	-4.75	-0.5	-0.25	-3.25
			8.08	4.5	4.25	-1.25	-0.25	1	-1	-1	0.75	-2.5				8.08	1.75	-2	-1.5	-3.25	1.5	-1	-1.5	-0.5	-3.5
			8.12	3.25	4	-1.5	0.5	2.5	2	1.75	-0.25	0.25				8.12	1	-1.25	-3.5	-2	-0.5	0.75	1.75	1	-1.5
			8.16	-1	2	-1.5	-0.75	2.25	3.5	2	0.75	2.75				8.16	-2	-0.5	-2.5	-2	0	0.5	2.25	4.75	-1
			8.2	-4	-2	1.25	-0.75	2.5	4.5	3.5	1.5	4.25				8.2	-3	-0.75	-0.5	-1.75	1.5	-1.25	1.75	5	1.75
			8.24	-5.75	-2.5	2.5	-0.5	3.25	3.5	4	0.5	-1.25				8.24	-4.25	-2	0	-0.75	1.75	-1.25	1.5	0.75	0.25
			8.28	-3	-0.5	1.5	-1.5	2	2.25	2.5	2	-1.75				8.28	-4.5	-1.25	-2.5	-0.5	1.5	-0.75	0.5	-1.25	-0.5
			8.32	-2.5	3	0.25	-1.75	1	2.75	1	3.5	-0.75				8.32	-4.75	0.25	-4.25	-2.25	0.75	1.5	-1.25	-2.25	-1.25
			8.36	-1.5	1.75	1.5	1.5	-0.75	2	-3.75	1.25	-1.75				8.36	-5.25	-1	-3.25	-3.5	-2.25	1.5	-3.75	-3.25	-1.75
			8.4	1	0	1.25	3.5	0.25	2.25	-1.75	0.25	-0.5				8.4	-2.25	-4.25	-2	-3.25	-1	0	-2.25	-1.5	-0.75
			8.44	1.5	-1.5	2.25	1.75	1.5	2.25	1.5	2	0				8.44	-1	-5.25	0.75	-1.75	-0.5	1	-1.5	0.75	-0.25
			8.48	0.75	1	1	0.25	0	-0.25	4	4.5	1.75				8.48	-0.25	-2.5	0.75	-1.25	-2.5	1	-0.25	0.25	-0.25
			8.52	1	0.75	-0.75	-1.25	0.25	0	3	4.75	0.5				8.52	-1	-1	0.5	-1.25	-3.25	-1	-1	-1	-0.75
			8.56	2.75	3.5	0	0.75	1.5	1	2.75	3	-2				8.56	0	-1	-1	-1.25	-2.75	-0.5	-1	-1.75	-2.5
			8.6	2.75	5.75	0.25	2	2.75	2.75	2	1.25	-4.25				8.6	1.5	-0.5	-0.25	0.25	0.5	-0.5	-1	-1.75	-4.5
			8.64	2.25	4	0.75	2.5	4	2.75	0.5	1.25	-2.5				8.64	-0.25	0	1.5	2.5	1.75	-1.75	-1.75	-0.75	-2
			8.68	1.75	-0.5	-1	2.5	3.25	0.5	-0.75	2.25	0.75				8.68	-0.75	-0.25	-1.5	1	-1.25	-2	-2	1.25	1.75
			8.72	0	-0.25	-3.25	3.5	3	2	-0.5	1	2				8.72	-0.5	0	-3.25	-0.25	-2.5	1.25	-0.75	-1.25	1.5
			8.76	-2.75	2	-1	3.5	1.5	4.5	0.25	0.25	4.25				8.76	-0.5	-0.25	-2.75	-0.25	-2.75	2.25	0	-3.75	1
			8.8	-2	3.25	2.25	0.75	0.5	3.25	1	0.75	3.25				8.8	-0.75	-1.25	-1.75	-3.75	-3.5	-0.5	-1.25	-3	0.5
			8.84	-1.25	4	5.5	2.5	3	0	-0.5	-1	2.75				8.84	-1.5	-1.5	2	-3.25	-1.5	-1	-2	-1	1.25
			8.88	1.5	3.25	4	3.5	4.75	-1.5	-2.5	-2.5	2.75				8.88	-3.25	-1.25	1.5	-2.25	0.75	-2	-1.5	-2	4
			8.92	2	2.25	1.25	4.25	2	0.75	0.75	-1.25	-1				8.92	-2.5	-2.25	-0.25	-1.5	-0.25	-1.75	-1.5	-2.75	0.25
			8.96	0.5	-0.25	4	1.5	0	2.25	0.5	0	-0.5				8.96	-3.25	-1.25	1.25	1.25	-1.75	-0.5	-3.25	-2	-2.75
			9	-0.5	-1	6.5	-1.25	-1	1.25	-0.5	0	2.25				9	-2.5	2	4	-1	-2	0.5	-2	-1.75	-1.5
			9.04	1.5	-2	2.75	-2.5	-0.5	-1.5	0	0.5	2				9.04	0.25	1.25	1.25	-1.75	-1.25	0.25	-1.25	-0.5	-2.5
			9.08	4.25	-1.5	-0.75	-2.5	-1	-4.25	1	1	3.25				9.08	3	-0.25	-0.25	-3	-0.5	-2.75	-1	-2.5	-2.25
			9.12	3.25	0.75	-1.5	1.5	-0.75	-3.5	3.25	-1	4.5				9.12	3	1.25	-1.25	-2.75	-0.25	-2.5	-0.5	-3.5	-1
			9.16	1.25	0.5	0.25	4	0.5	-0.5	3	-2.5	1				9.16	1.25	0.25	-1.5	-0.25	-1.75	0	-0.25	-3.25	-2.25
			9.2	1.25	0.25	2.5	0.75	1.5	1.75	0.75	-1.5	-2.75				9.2	-0.25	-2	-0.5	0.25	-2.5	0.5	-0.25	-0.25	-2.5
			9.24	1	-2.5	1	-2	1	2.25	-0.25	-3	-2.75				9.24	-2.75	-2.25	-2.25	-0.75	-3.5	0.5	-2	-1	-0.75
			9.28	-0.75	-1.75	-2	-0.25	3.5	1.5	-1	-3.25	-1.5				9.28	-2.25	0.25	-4.25	0.75	-1.25	-0.75	-5.25	-1.25	0.5
			9.32	-1.25	-1	-2.75	3	3.75	-0.25	-3	-0.25	2.75				9.32	-1.25	0.5	-5.5	2.25	1	-3.25	-6	1.5	3.5
			9.36	-0.25	0.75	0	4.25	2.75	-0.25	-4.5	3.25	2.75				9.36	-2	-1.75	-3.25	3.25	1.25	-4.25	-3	3	2
			9.4	3.25	1.75	2.5	2.75	0	1.5	-4.5	2	0.25				9.4	-2.25	0.25	1.5	3.25	-2.5	0.5	-1.75	0.5	-0.5
			9.44	3	0.75	2	1.25	-3.25	2.75	-2	-0.5	0.75				9.44	-2	0.25	3.5	0.75	-4.25	3.25	-2	-2.75	-0.5
			9.48	2.75	-1.75	-1.25	0	-4.5	1.75	0.5	0	1				9.48	-0.25	-3.5	-1	-3.25	-3.75	-0.5	-1	-3.25	0.5
			9.52	0.5	0.5	-3.25	-0.5	-1.75	1.25	0.25	3	-0.5				9.52	-0.75	-3.75	-3.5	-5.75	-4.5	-1.5	-2.25	-1.5	0.25
			9.56	-1	0	-1	-0.75	0	4	1.75	1.75	-0.25				9.56	0.5	-2.75	-3.5	-4	-4.5	1.25	-1.75	0.25	-1.25
			9.6	-0.75	0.5	1.25	1.5	-0.25	3.75	1.75	0.5	-3.25				9.6	3.25	-2.25	-1.25	-2.75	-1.75	0.25	0.5	-0.25	-3
			9.64	0	0	2.5	1.5	0.5	-0.25	3.25	0	-6				9.64	2	-5	-0.5	0	-1.25	-1.75	3	-1.25	-2.25
			9.68	-1.25	0.75	2	0.25	1.25	-3.25	2.5	0	-2.25				9.68	-2.25	-5	-1	-0.25	-0.5	-3.5	1.25	0	0.5
			9.72	1	0.75	1.75	-0.75	2.75	-0.25	1.5	1.75	3.75				9.72	-3.25	-1.75	-0.75	-1	2	-3	-1	1	2
			9.76	0	-0.5	1.25	0	3.25	0.25	-0.25	2.5	3.5				9.76	-1.5	-1	-2.5	1.75	4.25	-1.75	-1.25	1	0
			9.8	-0.25	1.25	3.25	-0.25	-0.5	-3	1.75	-0.75	0.25				9.8	-0.5	-1.25	-0.25	-0.5	3	-2	1.25	0	-1.75
			9.84	-0.5	3.5	2.75	-1.75	0.5	-2	0.75	1.5	0				9.84	-1.25	-1.25	0	-2	2	-2.5	0.75	1	-1.5
			9.88	0.5	4	0.25	-1.25	3.25	1.5	-1.5	2.5	-0.25				9.88	-3	-0.75	-2	-2.5	0.75	-1	-1.5	1.5	-2.25
			9.92	1	3	1.25	-1	1.75	3.25	-2.75	2.25	-1.25				9.92	-4.25	0.25	-0.5	-1	-1.75	-1.25	-3.75	1	-2.75
			9.96	0.75	0.5	3.5	1.25	2.5	1.5	-2.25	2.5	-2				9.96	-3.25	0.5	1.25	0	-1.25	-3.5	-5.25	0.25	-3.25
			10	0.5	-1.5	1.5	5	2.75	-0.75	0.75	-1	0.25				10	-3.5	-1.75	0.75	2.25	-2	-2.5	-3.5	-3	-1.25
			10.04	0.25	-0.25	0.75	3.25	2.25	2	1	-1.25	1.25				10.04	-2	0.25	-0.75	0.75	0.5	0.75	-3	-5	0.25
			10.08	3	-0.25	-0.5	-1.75	2	2	-0.75	2	2.25				10.08	3.25	-0.25	-3.25	-3.5	3.75	1.5	-4.75	-2.5	0
			10.12	4.5	0.25	-1	-3	-0.25	0.5	-2.25	3	1.75				10.12	3.75	-1.25	-2.75	-3.5	-1.25	3	-5.5	-0.75	0.25
			10.16	4.5	1.75	-1	-2.25	-0.75	-0.5	2	-1	3				10.16	1.5	-0.25	0.25	-3	-4.75	3.25	-0.75	0.5	-1
			10.2	2.25	3.25	2	0	1	-2	5	-2.75	1.25				10.2	0.75	0.75	2	-3.25	-3.25	-1	0.75	0.5	-2.5
			10.24	1	1.75	4	0.25	3	-0.25	2.5	-2.5	-1				10.24	-1.25	1.75	2.75	-3.25	0.75	-2	-1.5	-2.5	-1.75
			10.28	2.75	-0.5	4.25	1.25	1.5	2.5	-0.25	1.25	-2.25				10.28	-2	0.25	1.5	-1	0.25	-2.5	-2.75	-3.75	-1.75
			10.32	2.75	0.5	3.5	2	-1.5	0.75	0.75	2	-3.25				10.32	-1.75	-3.25	0.75	-0.5	-3.5	-2.5	-2.25	-1.5	-3
			10.36	-1.25	0.75	1.5	4.75	-1.75	-1	3.5	2.75	-1.75				10.36	-2	-1.75	0.5	-1	-1.75	-1.25	-0.25	-1	-2.5
			10.4	-1	0.75	0.25	5	0.25	0.25	4.25	3	-0.25				10.4	-0.25	-0.25	1.5	-0.25	-1.25	0.75	3	-2	-0.75
			10.44	1.5	2	-0.5	3	2	1	2.5	2	2				10.44	0.75	-2.5	1.25	0.75	-2.5	1	3.25	-1.25	1.5
			10.48	2.5	1.5	-1.5	1.5	-0.5	1.75	0.75	3.25	3				10.48	0.5	-3	-0.75	1	-4	-0.5	2.5	1	1
			10.52	0	-0.75	-3.25	1.75	-3.5	1	-1.25	2.5	2				10.52	-0.75	-1.75	-3.5	1.25	-5.75	-1.5	0.25	-0.25	-0.5
			10.56	-3.75	-2	-1.25	1.5	-1	-1.5	-2	2.25	-0.25				10.56	-1.75	-1.5	-2.25	0.5	-3.25	-2.75	-2	-0.25	-0.25
			10.6	-3.75	-2.75	-1.5	-1.5	1	-2.75	0.25	1.5	-2.25				10.6	-3.75	-3	-2	-3.5	-1.5	-3.25	-1.75	-2.25	-1
			10.64	-0.75	-0.75	0	-0.5	2.25	-2.5	2	2.25	-3.5				10.64	-3.75	-1.5	-2.25	-3.75	1.75	-2.25	-0.25	-0.75	-2
			10.68	0.75	-1.75	-2.5	1.75	-0.25	-0.75	0.5	2.75	-3.25				10.68	-2	-2.25	-3.25	-3.5	0.75	0.25	-1	-0.75	-1.75
			10.72	-0.5	-1.75	-1.5	4.5	-1.25	0.25	-1	1.75	-1				10.72	-1	-2	-4	-0.25	0.5	0.5	-1.25	-2.5	-3.25
			10.76	-0.25	-1.5	1.75	1.5	-0.25	1.5	1	-1.5	1.25				10.76	-0.75	-3	-1.5	0.75	-1.25	-1	-0.25	-4	-6
			10.8	1	-1.5	3.25	0	1.25	1	1.75	-2.5	2				10.8	-1.5	-1.75	0.75	0	-2.25	-2.25	-1	-3.75	-2
			10.84	1.5	0.75	1.75	1	-1.5	-0.75	-0.5	-1.25	3				10.84	-0.5	1.25	-0.75	0.5	-2.25	-1.75	-1	-1.75	1
			10.88	0.5	2	0.75	1.25	-2.25	-3	-2.5	0.75	1.25				10.88	0	2.25	0.25	-0.75	-2	-1.5	0.5	-1.5	0.25
			10.92	-0.75	3	-0.5	0.5	-1.5	-2.25	-4	1	-0.75				10.92	0	-0.25	0	-0.75	-3.75	-1.75	1.25	-1.75	-1.25
			10.96	-1	0.25	0	-0.5	-2	-1.5	-4	0.5	-1.75				10.96	-0.25	-1.25	0.75	-1.75	-4.75	-2.75	2.5	1.25	0.75
			11	-1.75	-2	1.5	1	-0.75	-0.5	-0.75	1.25	-3				11	-0.5	-0.75	0.5	-0.75	-0.75	-1	2.25	1.5	1.75
			11.04	-2.25	-2.75	0.5	1.25	1	0	1.25	-0.5	-1.25				11.04	-2.25	-1.5	-0.25	2	3.5	0.5	0.25	0	3
			11.08	-0.75	0.5	-3	-0.25	2.75	1.75	0.25	-1.75	-0.75				11.08	-1.25	0.5	-3.75	0.75	3.5	0.25	-1.75	-1.75	2.25
			11.12	1.5	1.5	-3.25	-0.75	0	2.5	1	2.75	-0.75				11.12	1	0.5	-3.75	-1.75	-0.25	-0.25	-3.75	-1	0.5
			11.16	2.75	1.25	-1.5	0.75	-2.5	1.75	1	2.75	0.75				11.16	0.25	0	-2.25	-1.5	-2.25	-0.5	-4.75	1	-2.25
			11.2	2.5	1	-1	2.75	-1.25	1	-1.25	2.5	2.25				11.2	-2	-0.25	-1.25	2	-0.25	-1.25	-3.75	2.5	-1.75
			11.24	0.75	1.25	0	2	1.5	1.5	-0.25	1	6				11.24	-1.75	0.75	-2.5	2	-0.25	-1.25	-2	3.75	2.25
			11.28	-1	0.5	1.5	0.25	2.25	2.75	1	-2.5	3.5				11.28	1.5	0.25	-0.25	-1	1.5	1	-1.5	1.75	2
			11.32	-3.5	-2	2	-2	-0.5	0.75	-0.75	-5	0				11.32	0	-0.5	2.25	-5.5	-1.25	2.5	-2.25	-1.5	0
			11.36	-2.75	-2.5	1.25	0.75	-0.75	-0.75	-1.25	-5.5	-2.25				11.36	0	-1.5	1.25	-3.5	-3.25	2.75	-1.75	-3.75	-3.5
			11.4	-1.75	-1.75	-1.5	1.75	-0.25	0.75	-0.75	-3.75	-1				11.4	0.5	-1.5	-0.5	-0.75	-3.25	2.5	0	-1	-2
			11.44	0	0.75	-1.25	2.75	1	0.75	0.75	-2.25	0.75				11.44	0.25	0.25	-0.25	1.75	-0.75	2	0.25	-1	0.25
			11.48	-1	0	-1	1	2.75	0.5	2	-2	2.5				11.48	-0.5	-0.25	-0.25	1	-0.25	1.25	1.75	-3.5	0.5
			11.52	-2.25	-2.75	0.5	-0.75	2.75	0.25	0	-2.5	1.25				11.52	-1	-3.5	-1	-0.25	1.5	0.25	2.75	-3.5	1.5
			11.56	-2.25	-2.5	0.75	-1.5	0	-0.25	-1	-0.25	-1.25				11.56	-1.25	-3.25	-0.5	-1.25	0.75	-1.25	0.75	-3	-0.25
			11.6	-0.25	-0.5	2.5	-1	1.5	0	0.5	0	-1.75				11.6	2.25	-0.5	1.5	-2	2.5	0.25	-0.75	-1.5	-2
			11.64	-0.25	0	1.25	-0.75	-1.25	0.75	-0.75	0	0.5				11.64	1.25	0	1.75	-2.75	-0.25	0.75	-3.25	-1.25	-3
			11.68	-1.5	-1.25	1	-1	-4.75	2.5	-1.5	1.25	1.5				11.68	0	-1	-1	-2.5	-3.25	2.5	-2.75	-1.75	-0.75
			11.72	-1	-1.25	0	1	-5.5	1.25	-0.5	-0.75	1.5				11.72	-1.75	-2	-1.25	-1.75	-4.75	1.5	0.25	-5.25	2.25
			11.76	-1.5	-0.75	-2.75	1.5	-3	-2	0	-0.25	0.75				11.76	-1.5	-1.75	0.25	-0.25	-2.25	-1.75	2	-3.5	0.75
			11.8	-1.75	-1.25	-3.75	4	-1.25	-2.75	-0.25	0.25	0.5				11.8	0.25	-1.25	0.25	3.5	-0.5	-1.25	-0.5	2.25	-0.75
			11.84	-1	-1.5	-2.25	5.25	0	-3	-0.25	-2	-0.25				11.84	1.75	-1.5	-1.25	3	0.75	0.25	-1	3.75	-3
			11.88	-1.75	0.5	0.25	0	-2.25	-3	3	-1.75	1.75				11.88	-2	0.75	-0.75	-1.25	0	0	0	1.75	-0.5
			11.92	-2	1.25	-1.5	-2.75	-3.25	-2.75	3	-2	0.5				11.92	-4.75	2.25	-4.25	0.5	-0.5	-1	-0.75	-0.25	-1
			11.96	0	4	-4.5	-2.25	-2	-1.25	0.5	-1.75	-1				11.96	-3	3	-1.75	1.25	-0.75	-0.75	-1	0.75	-2.75
			12	-0.5	1.75	-4	-3	-1	1.75	-1.25	-2	-1.75				12	0	-1.5	-0.25	-0.75	-2.25	1.75	-1.5	0.75	-2.5
			12.04	-1	-2.75	-2.25	-0.75	1	2.25	-3.5	-5	0				12.04	1.25	-3	0.75	-0.5	-2	1.25	-2.5	-2.25	-0.75
			12.08	-1.25	-3	-1	2	2	3.5	-4	-3.25	2.25				12.08	0	0.5	0.25	0.75	-0.5	0.5	-1.75	-1.75	1.25
			12.12	0.5	-2.5	-1.5	4.25	2.5	5	-1	0	0				12.12	-0.5	-0.25	-3.25	1.75	-1	0.5	-2	0	0.75
			12.16	-0.5	-2.5	-2.25	1.25	1.75	4.75	0.5	0	-1.5				12.16	-2.75	-2.75	-5.25	-0.5	-0.75	2.25	-1	-0.75	0.25
			12.2	-1.5	-1	-1	-4.75	0	0.25	1	1.25	-2.75				12.2	-5.25	-2.5	-4.25	-4	-0.25	-0.5	-2.5	-0.75	-1
			12.24	-0.5	-1.5	0.75	-5.25	1	-1.75	4	3.25	-4				12.24	-3.75	-0.5	0.5	-6.25	1.75	-2.25	0.25	1	-1.75
			12.28	-0.5	-2.75	-0.5	-4.75	-0.25	-2.5	4.75	3.5	-3.5				12.28	-3.5	-0.5	2.25	-5.25	0.25	-0.75	3	-0.5	-1
			12.32	-2.5	-3.25	-2.75	-3.25	-1.5	-5.75	1	-0.5	-3				12.32	-3.25	-3.5	1	-3.25	-3	-1.5	1.75	-0.75	-1
			12.36	-3.75	-3.5	-2.75	-1.25	-2.5	-4.75	-1	-2	-1.75				12.36	-3.75	-6	-1.75	-2.25	-4.25	-2.5	-0.75	0.5	0
			12.4	-2.75	-3.25	-0.75	-0.75	-1.75	-2.5	-1.75	-3	0.5				12.4	-1.25	-3.5	-2	-0.5	-2.75	-1.75	-2.25	-1.75	3
			12.44	1.25	-1.25	1.25	-3.5	-1.25	-1.25	-0.5	-3.25	1.25				12.44	2.75	-1.75	1	-2.25	-0.75	-1.75	-1.25	-1	3
			12.48	1.25	1.5	2	-4.75	0	-0.75	0	-3.25	0.75				12.48	3.5	1.75	2	-5	1	0.75	0.75	0.75	2.5
			12.52	1.25	4	3.5	-4	-1.75	0.75	-0.75	-2	-0.75				12.52	2.5	5.5	1.5	-5.75	-0.75	1	0.75	0	0.25
			12.56	1.25	3.5	0.5	-0.75	-3.25	-1.5	-1	-3.25	0.25				12.56	-0.5	3.75	-0.25	-1.5	-2.75	-2.5	1.5	-2.5	-2.5
			12.6	-0.75	1.5	-1.25	1.25	-2.25	-1.5	0	-2.25	0.5				12.6	-2.5	0	-0.5	0.5	-4	-2	2.25	-1.75	-2.5
			12.64	-2	1.25	-2	-1.25	-1.75	0.25	0.5	-2	-1.25				12.64	-0.75	-2.25	-2.75	-1.75	-4.25	0.25	-1	-2.5	-1.5
			12.68	-1.25	-0.25	-0.25	-2	-3.25	0.5	-3	-0.75	-4.75				12.68	1.25	-4.25	-3.25	-1.25	-3	1.75	-3.5	-2.75	-3
			12.72	0.25	-0.75	-1	-2	-2.25	-2.5	-3.75	0.75	-7				12.72	-0.5	-2	-3	1.25	-1.25	-1.25	-2	-1.25	-6
			12.76	-0.5	1.25	-2	-0.5	0.5	-2.25	-3.5	-0.5	-4				12.76	0.5	0.5	-2.75	2	0.5	-5.25	-1.75	-2.75	-5.75
			12.8	-3	0.5	-0.75	0	1	-0.75	-1.5	-0.5	-2.75				12.8	-0.75	0.25	-1.75	1	1.75	-3.5	-1	-2.5	-2.5
			12.84	-2.5	-0.75	-1.25	0.5	0.75	-0.75	-1.75	-1.25	-3.25				12.84	-2.25	-1	-1	0	0.5	-3	-1.75	-2	-1
			12.88	0	-3	-2	-0.25	-0.5	-0.5	-2.75	-2	-1.5				12.88	-2.5	-2.75	0.75	-1.25	-2.5	-0.75	-4.5	-0.25	-0.25
			12.92	1	-5	0.5	-1	-0.25	0.5	-3	-3	-2.5				12.92	-0.75	-3.25	1.75	-2.5	-2.75	3.5	-6	-1	-1.25
			12.96	0.5	-3	1.25	-1.25	0.25	-1.75	-1.25	-3	-0.5				12.96	-1	-2.75	-1.75	-1.25	-1.75	2	-5.5	-1.75	-1.75
			13	-3.25	1	-1.25	-1	2	-1	1	-2.5	-0.25				13	-1	0.75	-3.25	0.75	-1.75	-0.25	-1.25	0.25	0.25
			13.04	-3.25	0.5	-1.25	0	4.5	0.25	-0.25	-4.25	-2.75				13.04	1.25	1.25	1	1	0	1	0.25	0.25	0
			13.08	-2.5	-0.25	-1.25	0	3.75	-0.25	0	-4	-3.5				13.08	0.5	0.75	0.5	-1.5	-0.5	-1	2.25	0	1.25
			13.12	-1.75	-1	-1.5	1.75	1.75	1.25	-0.75	-1	-2.75				13.12	-1.25	1.5	-1	-3.75	-0.75	-3	0	1.5	0
			13.16	-2	1.25	0.25	-0.75	1	1.25	-0.5	3.5	-0.75				13.16	-2.75	3.25	-1	-2.5	1	-1.5	-1	1.5	-2.5
			13.2	-0.5	0.5	2	-1.25	0.5	-1.25	-0.25	4	-1.25				13.2	-4	2.75	1	0.75	1	-3	-2.25	-0.5	-3.5
			13.24	0	-2.5	1	1.75	2	-3.25	-1.5	0.75	-0.75				13.24	-4.25	-2.25	1.5	2.75	1.75	-5	-2.75	-1.5	-0.5
			13.28	0.75	-4	-2	2	2.25	-3	-1.25	-1	1.75				13.28	-3.25	-4	0	-0.5	1.75	-1.75	0	-0.75	2
			13.32	1.25	-2.5	0.25	2	-0.5	-3	-1.25	-3	0.25				13.32	-0.25	-3.5	1.75	-1	-0.75	1	2	-1.25	0.25
			13.36	0.5	0.5	1.5	0	-2.5	-4	-0.25	-1	-1.75				13.36	1.5	-0.75	2	-0.25	-1.5	0	1.25	0	-0.25
			13.4	0	-0.5	0	-1.75	-1.5	-2.25	1.25	1.25	-1.25				13.4	0.75	-2	-0.5	-0.25	-1.5	0.5	1	1.25	0.75
			13.44	-2.25	-4.25	-2.75	-2	0	2.25	0.25	3	-1				13.44	-2.5	-3.75	-3	-0.5	-1	0.5	1.25	3.75	-0.25
			13.48	-0.75	-4.25	-3.5	0.5	-1.25	4.5	0.25	2	-0.75				13.48	-3.75	-4	-4.5	-0.75	2.25	0	2.25	2	-1.25
			13.52	-0.75	-0.5	-3.5	1.25	-0.75	-0.25	-1	-1	-2.25				13.52	-2.75	-1.75	-2	-1.25	4	-3.75	1.25	-1.25	-1
			13.56	-2	-0.75	-2.25	-1.25	0.25	-3.25	-1.5	-4.25	-1				13.56	-3.25	-1	-1.5	0.25	1.25	-3.25	-1.5	-3	-1.25
			13.6	-3.75	-2.5	-1.5	-2	-2.5	-3.25	-0.25	-5.5	-0.75				13.6	-3.5	-0.5	-0.75	1.75	-1.25	-1.5	-2.25	-2.75	-3.5
			13.64	-2.75	-0.75	-0.5	-0.25	-4.5	0.25	-2.25	-4.25	0.75				13.64	-0.75	0.25	0.25	0.5	-4.25	0.25	-5.25	-2	-2.25
			13.68	-1.5	2.25	-2	-0.25	-2.75	1.25	-1.5	-2.5	1				13.68	-1.5	1.5	0.25	-1.5	-3.75	-1	-2.75	-2	1
			13.72	1.25	3.5	-1.25	2	-1.25	1.5	0.5	1.5	-0.5				13.72	0	3.5	1.75	0	-3	2	-1	-0.5	1.5
			13.76	1.75	2.25	0	1	-1.75	2.25	-2	3.5	-0.25				13.76	3	3	1	0.75	-2.75	4	-2	1.25	1
			13.8	-1.75	-0.5	-0.75	0	-1.5	0.75	-1.5	0.75	0				13.8	1	-0.25	-1.25	1	-1.5	0.75	-2	-1.25	-0.5
			13.84	-3	-1.5	-2.5	-1.75	-0.75	-0.25	-1.25	-2.5	0.75				13.84	-1.5	-2.5	-1.75	-1	-2	-2.5	-1	-3	-0.25
			13.88	-2.25	0	-4.5	-3.5	-1.25	0.5	-1.75	-1.25	-0.5				13.88	-3	-1.25	-5.75	-3.5	-4.25	-1.75	-1	-0.5	1
			13.92	1.5	3.75	-4	-1.75	-1.75	0.5	-1.5	-1	-1				13.92	-1.5	1.5	-5.5	-2.25	-2.25	1	-0.5	1	-0.5
			13.96	2.75	2.5	0.25	-1.75	-0.5	-2	1.5	-0.5	-0.75				13.96	0.25	1.25	-1.75	-1	0.5	-0.25	1.75	-0.25	0
			14	0.75	-2.75	0	-2	0.5	-5.25	3	-2.75	-0.5				14	0.25	-2.5	1.25	0.5	1.25	-2.25	0.75	-3.75	-1.75
			14.04	-0.75	-2.5	-1.25	-2	-0.25	-6.75	1.5	-4.25	-2.25				14.04	-1.75	-2.5	1.5	2	0.5	-2	-1.75	-3.75	-3.5
			14.08	-2.5	-2.25	-1.75	-2	0.75	-6	-0.25	-2.75	-4				14.08	-4.25	-1.75	0.25	1.5	-0.75	-0.5	-0.75	-1.25	-2.75
			14.12	0.25	-0.25	-1.75	-2	-0.75	-4.75	-1	-3.25	-3.5				14.12	0.75	-0.75	-1.5	-0.25	0.25	-1	1	-1	-1
			14.16	2.25	2	3.25	-0.75	-3.25	-2	-1.75	-2.5	-1.5				14.16	3	-1	0.25	-0.5	1.75	-2.25	-0.75	-0.5	0
			14.2	-0.75	1.5	2.75	-1.25	-3.75	-1.25	-0.5	1.25	-0.5				14.2	0.25	1	1.25	0.75	-0.5	-4	-0.75	0.75	1.25
			14.24	-1.5	-0.25	1	-3.25	-2.25	-1.5	-2.25	1.25	-1.5				14.24	-1.25	2.5	-0.25	-0.25	-2.75	-3.25	-1.5	0.5	2.25
			14.28	-1.25	0	0.75	-2.75	-0.5	-1.25	-2.5	-1.25	-2				14.28	-1.5	1.75	-1.25	-0.75	-2.25	-2.25	-1	-1.25	1.25
			14.32	-2	0.25	-1.25	-3.75	0.5	-2.25	-2.25	-2.75	-2				14.32	0.75	0.25	-0.75	-3.5	-0.25	-1.75	0	-2.75	-0.5
			14.36	-1.5	-1.25	0	-3.25	1	-2	-1.5	-2.5	-3.5				14.36	3.25	-1.25	0	-2.25	0.75	0	-1.75	-0.75	-4.5
			14.4	-2	-2.75	-0.75	-1	0	0.75	-0.25	0	-3.5				14.4	0.75	-1	-2	-1.5	0.25	2	-3.25	0.5	-4.75
			14.44	-2.25	-3.75	-2	-0.5	-1.5	4.5	-0.5	0.75	-1				14.44	-1.25	-1	-1.75	-2	0	2	-2.5	0.75	-2.25
			14.48	-1.25	-2.5	-1	-1.25	-3.5	3.5	-0.5	0	0				14.48	0.5	0.25	0	-0.75	-1.5	-0.5	0.25	0.5	-1.25
			14.52	-0.25	0.5	1.25	-0.75	-3	3.75	0.25	-0.5	-0.25				14.52	-0.75	1.75	2.75	1	-3	1.75	2.5	0.25	-1.75
			14.56	1.5	1.75	1.25	-1.5	-2.5	1.25	1.75	0.5	0.25				14.56	-1	1.5	3	-2	-3.25	1	4.25	2.25	1.5
			14.6	1.75	3.75	-1.5	-3	0.75	0.75	-0.25	-0.25	-1.25				14.6	0.5	0.5	1.75	-2.75	0.25	-0.25	2.5	0.25	3
			14.64	0	3	-1.75	-3	1.75	0	-1.25	-2.75	-2.25				14.64	1	-0.5	2	-3.75	3	0.75	-1	-2	2.75
			14.68	0.25	1	-0.25	-2	-0.5	-0.25	-2	-2.5	-1.5				14.68	0.25	1	1.75	-3.25	2	0.5	-3	0.25	-0.25
			14.72	-0.5	-0.25	-1.75	-1.25	-2.5	-0.25	-1.25	-1.25	-2.75				14.72	-1.25	1.25	-2.25	-2	1	0	-1.75	3	-2.25
			14.76	-1.75	0	-1	1	-0.5	1.25	2.75	-1.25	-2.75				14.76	-1	1.5	-2.75	1.5	0.25	0.25	0	2.5	0
			14.8	0.5	1.25	0	-0.5	1.5	2	2	2.25	-1.75				14.8	0.5	1.25	-0.75	1.75	1.75	1.75	-0.25	2.5	1.75
			14.84	2.25	-1	-1	-0.5	1.25	2	-0.5	2.25	-1.25				14.84	0.5	-2	0.25	-1.25	1.75	1	-1	-0.75	0.5
			14.88	-0.75	-1.5	-0.75	-0.25	-0.75	-1	0	-0.75	-0.25				14.88	-0.75	-2.5	-1.5	-1.25	0.25	-1	0	-3.5	0
			14.92	-3.25	-3	0	-2	-1.25	-1.75	-1.75	-3	-0.5				14.92	-2.25	-4.75	-1	1.25	-0.25	-4	0.75	-4.25	0.75
			14.96	-1.5	-3.75	1.5	-3.5	-1	-2.5	-2	-2	-2.75				14.96	-2	-3	1.75	1	-0.25	-3.25	-0.5	-2.5	-0.25
			15	0.25	-1.5	3	-3.75	-0.75	-1.25	1.75	-0.5	-2.5				15	-4.25	-1.75	3.5	-0.5	-0.25	0.25	-0.25	1.25	-1.75
			15.04	-0.75	1.25	1.5	-0.75	-0.75	1.75	4.75	0.25	-1.5				15.04	-3.75	-1.5	1.75	-0.75	-1.75	3	1	3.5	-3.5
			15.08	-3.75	1.5	0.25	2	-1.5	3.25	1.25	1.75	1.25				15.08	-2.5	0.25	0.75	0.75	-1.25	2.75	-0.5	2.75	-0.25
			15.12	-5	1.25	-1	0.5	-0.75	0	-2.25	2.5	1.5				15.12	-0.5	-0.5	1.25	-0.25	0	0.75	-2	1.5	2.75
			15.16	-3.5	0.25	-3.25	-2.5	0	-1.75	-3	2.25	-2				15.16	0.5	-1.25	-1	-0.25	1.75	-0.75	0.75	0.25	1.75
			15.2	-2	1.25	-0.75	-3.5	-0.25	-2.5	-2.5	0	-2.75				15.2	0	1	-1.25	-2	1	-3	1.75	-2.25	-0.75
			15.24	0	4	2.25	-1.75	0.25	-1	-2.75	-1.25	-0.5				15.24	-1.75	2.25	0.75	-0.75	0.5	-1.5	-0.5	0	-2.5
			15.28	-1.25	4.25	2.25	0.5	-1.25	-0.5	-2.75	-2.5	-0.75				15.28	-2.25	1.5	1.75	-0.5	-0.75	-1.25	-0.75	2	-2
			15.32	-1.75	1.75	0	0	-0.25	0.75	-3.5	-1.75	-2.25				15.32	-2	1.75	0.25	-1.5	0.25	1.75	-2.75	-1	-3.25
			15.36	0	1	-0.75	-1	1.25	1.5	-3.5	-0.5	-1.75				15.36	-1	1.25	-0.25	-1	3	2.25	-3.5	-3	-1.75
			15.4	0.25	-1	-2.5	-1.25	1.75	-0.75	-2.75	0.5	-1.5				15.4	0.25	0.5	0.25	-0.75	2.75	-1	-1.75	-3.5	-0.5
			15.44	2	-2.25	-3	1	-1.75	-3	0.75	-1.75	-0.5				15.44	3.5	1.25	-0.5	-0.5	-2.25	-1	-0.5	-3	-0.25
			15.48	1	-4.25	-1.75	4.5	-4.5	-2	0.75	-2.25	-1.5				15.48	2.75	-0.25	-1.25	0.5	-4.5	0.75	-0.75	-1.75	-1
			15.52	1.25	-5.25	0	0.5	-4.75	-0.25	1.75	-2	-1.25				15.52	0	-3.5	-0.25	-2.5	-3	2.75	-0.75	-2.25	-0.25
			15.56	0	-4.5	-0.25	-2.75	0.25	2	0.25	-1.25	-1				15.56	-0.75	-2.75	0.75	-2	0.5	3.5	-3	-2.5	2
			15.6	1	-1.25	0.75	-4	4	3.75	0.25	-0.75	-0.25				15.6	-0.25	0.75	1.5	-2.75	4.75	3.5	-3.25	-1.25	1.75
			15.64	2	2	1.75	-0.25	2	2.5	0	0	1.25				15.64	0.75	2.25	1	0.25	4	1	-0.5	-0.5	0.75
			15.68	2	1.25	1.25	2	-1.25	-0.75	0.25	-2.75	2				15.68	-0.75	1.5	0.5	2.75	-1.5	-0.75	0.25	-1.25	0.5
			15.72	-1.25	-1.25	1	-0.25	-2.25	-1.25	3.75	-2	1				15.72	-0.75	0	0.25	0.5	-1.5	-2.5	3	1.5	-1
			15.76	-3.5	0.5	-0.75	-1.5	-3.5	-2	5.25	-1	1.5				15.76	-2	-0.75	-1	-0.75	-0.5	-3	2.5	0	-1.5
			15.8	-4.5	0.5	0.5	-3	-4.75	-4	1.5	-0.5	0.75				15.8	-4.5	-1	-0.25	-1.5	-1.25	-1	0.25	-1.25	-1.5
			15.84	-3	-1.75	2.5	-1	-4.25	-2.75	-2.5	-0.5	-2.5				15.84	-1.25	-2.75	2.25	0.75	-2.5	1	-2	-1.25	-3.75
			15.88	0.25	1.25	0	4	-1.75	0.5	-2.75	0.5	-1.5				15.88	1.75	-1.75	1	1.75	-2.5	1.5	-1.5	-0.25	-3.5
			15.92	0	2	-1.25	3.25	0.25	1	-1.25	2.5	0.5				15.92	-0.75	2.5	-1	0.75	0	1	1.25	0.25	-0.75
			15.96	-0.5	4.25	1.75	1	-0.75	0.25	-1.25	1.25	1.75				15.96	-0.75	5.75	0.25	2.5	1.75	-1.5	0.25	0	0
			16	-0.25	2	2.75	-0.25	-1	-1.75	-2.5	-1	-1.75				16	0.75	3.5	1.75	2.25	0.75	-1.5	-1.5	2	-1
			16.04	-2	-0.25	0.5	-2.25	-1	-2	-1.25	0.25	-2.25				16.04	-0.75	1.5	0	-0.75	-2.5	-2.25	1.25	5	0
			16.08	-2.75	3.25	-1.25	-1	-1.75	0.25	2	1.25	-2.75				16.08	0.75	3	-2.75	-1.5	-3.75	-0.75	3	3.75	1.5
			16.12	-1.25	4.75	-1.25	0.5	-1.5	0.5	-0.5	1.5	-1.75				16.12	0.75	4.25	-2.5	0.75	-2.25	1	0	1.5	4.25
			16.16	-1.25	2.5	-1	1	-0.25	-2.75	-1	1.25	0				16.16	0.25	2.25	-2.25	2.5	-0.5	1.25	0.25	-1	4
			16.2	-3	0.5	-2.5	-2	-0.25	-3.75	0.5	1.25	0.75				16.2	0.25	-0.25	-2.5	2.5	0.5	-0.5	2	-1.5	1.25
			16.24	-2.75	-2	-0.75	-1.5	-2.75	-3	0	0.75	0.25				16.24	-0.25	0.25	0.75	1.25	-3	-1.75	1.5	0.25	0
			16.28	-1	-3.75	0.75	1.25	-3	0.5	-2.25	0	1.25				16.28	1	0.75	2.5	-0.25	-3.75	0	2	1.25	-0.75
			16.32	1.75	-1.5	-2.5	1.5	0	2.5	-1.25	0	-0.25				16.32	3	-1.75	3	-1	-2.25	0.75	1.5	2	-0.25
			16.36	2.25	-1.75	-2	0.25	-0.5	2.5	-1.25	-1.5	-2.25				16.36	3.5	-3	3.25	-0.25	-1.5	1.25	-1.25	-0.5	1.75
			16.4	0.5	-2.75	2	-0.75	-1	1.5	2	0	-0.75				16.4	2.5	-2	4	-0.75	-0.75	1	-0.5	0.25	3.75
			16.44	-0.25	-2	3.25	-0.25	1	-2.5	1.75	2.5	0.5				16.44	-0.75	-2.5	5.75	-1.75	1.75	-1.25	1.5	4.25	2.25
			16.48	-0.75	-1.75	-0.75	-1.5	2.25	-4	-2.5	2.5	0.75				16.48	-2.25	-1.5	4.25	-1.25	8	-0.75	1	4.75	0
			16.52	0	-0.75	-3.75	-0.25	2	-3	-3.25	2.25	0.5				16.52	0	1.25	1	2.25	8	-0.25	-0.75	4.25	0.25
			16.56	2.5	-0.75	-2.75	-0.75	0	-2.25	-1	-0.5	-1.25				16.56	4.25	3	-0.25	0.75	1.75	0.75	-2.75	0.5	0.5
			16.6	1.75	-0.5	-3	-1.25	0	-2.5	-1	-5.75	-6				16.6	5.5	3.25	-0.75	0	0.25	0.25	-2.5	-2.25	-1.25
			16.64	-0.75	0.25	-1	0.25	1.5	0.25	-1.5	-6.75	-5.75				16.64	1.75	2.75	-0.5	0.75	3.25	-0.25	0.25	-2	-2
			16.68	-2.5	-0.75	-2	0.25	-0.75	0.5	0	-1.75	-3.25				16.68	-0.5	2.75	-2.5	-0.75	1.75	-1.75	1.25	-1	-2.75
			16.72	-1.5	-1.25	-2.75	0.5	-3.75	-2	2.25	0	-3				16.72	1.5	2.75	-3.25	2.5	0.25	-0.75	1.75	-0.75	-2.5
			16.76	-0.25	-2	-2	-0.25	-4.25	-4.25	0.75	-1	-2.5				16.76	5	1.75	-1.5	5	-0.25	-0.5	1.5	1	-2.5
			16.8	-0.25	-0.5	-2.25	0.25	-2.25	-0.75	-3	-4	0.5				16.8	5	1.75	-0.25	4	-1.25	1	2.5	-0.25	1.25
			16.84	-1.5	-1	0	0	-1.25	0	-5.75	-4.75	0.5				16.84	3.75	0.25	1.75	2	-2.5	1.5	0.5	-1.25	5
			16.88	-1	-3	1.25	-1	0.75	-0.75	-2.75	-4.25	-1.75				16.88	2.75	0.5	2.25	-2	-1.5	1.75	1.25	-0.75	4.25
			16.92	0.5	-4.25	2	-2.5	0.5	-1.5	3.25	-0.5	-0.75				16.92	0.25	-1	1.5	-5	-1.75	2.25	2	1.25	3.25
			16.96	-1.25	-1	1	-2.25	-2.75	-0.5	2.75	1	0.5				16.96	-2.5	-1.25	2	-2.25	-1	3	1.25	2.5	2.75
			17	-5.75	1	0.25	1	-3	-2.25	-4.25	1	-1.25				17	-1.25	0.25	3.75	2.25	-0.5	0.75	-0.25	2.5	1.25
			17.04	-5.25	1.25	-3.5	0.5	0.5	0.75	-3.75	1.5	-0.75				17.04	2.5	2.5	1.5	4.25	0.75	2.75	-1.25	2	1
			17.08	-1.5	1.75	-4.25	-0.5	0.5	1.5	-2.75	0.25	-0.25				17.08	0.5	3.25	-0.25	4.5	1.5	3.5	-1	-0.5	1.25
			17.12	1.5	-0.5	-3.5	-1.25	-1.5	-0.75	-1	-3.75	-1.5				17.12	-2.5	0.75	1.25	1.25	3.5	2	1	-3	1.25
			17.16	1.5	-3.25	-1.5	-2	-2.25	0.5	2.5	-5.75	0.25				17.16	-0.25	1	0.25	-1.25	3.5	0.75	4.75	-0.75	3
			17.2	-2	-5.25	1.5	-0.25	-1.25	2	3	-0.25	-0.75				17.2	0.5	0	1.75	0.75	2.75	2	3.25	4.75	2.5
			17.24	-4.25	-3.5	0.5	-0.75	-0.5	1.25	2.75	1.75	0.25				17.24	0	-1.25	1.75	0.75	2.25	1.25	2.75	5	3.75
			17.28	-2.75	-2.25	-2.25	-1.5	-1.5	2	0.75	1.5	-2.25				17.28	1.25	-1.25	0.75	0.75	2	2.5	2.75	5.25	0.5
			17.32	-1	-1	-3.5	-3.25	-4	-0.5	-2.5	0	-2.5				17.32	4	1.75	1.5	-0.5	1	0.75	2	1.25	0
			17.36	-0.5	-0.5	-0.25	-2	-2.5	-1	-5	-0.75	0				17.36	5	3.75	4.75	2	1.25	1	-2.75	-1.25	1.75
			17.4	-2.75	0	1.75	-1.5	-1	-3	-5.75	-2	-0.25				17.4	1.75	3	1	0.25	0.25	-0.5	-3.75	-1	0
			17.44	-1.25	0.75	0	0.75	3.25	-3.5	-4.5	-3.75	-0.5				17.44	1.75	3.75	0.5	-1	2.25	-1.25	-2.25	-0.25	0.5
			17.48	1.25	0.75	-1	3.5	1.75	2	-4.25	-4	-1				17.48	1.25	4.75	0.75	4.25	0.5	0.75	-1.5	-1.25	1.25
			17.52	3.75	-3.25	-2.75	1.5	-1	2.25	-3	-1.75	-1.25				17.52	1.75	-3.5	0	5.25	-0.75	2.5	-2.5	0.25	2
			17.56	4.75	-5	-3	-0.25	-0.5	-1	1	0.5	-1				17.56	0.75	-7.25	-0.5	1.25	-0.5	1	-1.25	2.75	2.75
			17.6	3.75	0.75	-2.25	-3	-1.25	-4.5	2.75	-2.25	-2.25				17.6	0.25	-2.5	-2.75	-1	-0.5	-1	2.25	1.25	2
			17.64	0.5	4.5	-2.75	-2.75	-3.25	-5	0.75	-1.75	-3.5				17.64	-0.25	4.25	-2.75	0.75	-0.25	-1.75	2	0	0.25
			17.68	-5	4.5	-2.25	-1.75	-4.75	-2.75	-0.25	0.25	-4.25				17.68	-1.75	4.5	-0.75	1.5	-0.5	-0.75	0.75	0.75	-0.5
			17.72	-5	-0.5	1.25	0.5	-2.5	-1.75	0.5	0	-1				17.72	-1.5	0.25	0.75	3.25	1.25	-1.75	0.25	3.25	2.75
			17.76	-3.75	-2.25	2.75	2	-1	-1	0.25	0	-1				17.76	-3.75	-1.75	3.25	2.25	2	0.25	-1	3.75	2.5
			17.8	0	-2.5	1.5	0.25	0	0.75	0.5	0.25	-2.25				17.8	-0.75	-3.25	3	2	1.75	3	-0.75	1.75	-0.25
			17.84	3	-3	1	0	0.25	3.75	0	-1	-1.25				17.84	1.5	-1.5	4.5	3	0.5	3.25	1.25	1	-0.25
			17.88	1.75	-1.5	0.5	-0.75	-1	1.5	-0.25	-2	-0.25				17.88	2.75	4	3.5	1.25	-1	2	1.25	1.25	-0.75
			17.92	-1.5	0.25	-0.25	-4	-2	-2.5	1	-3.75	0.5				17.92	2.25	5	1	-1.25	-1	0.75	0.25	0	1.5
			17.96	-1.25	1.75	-1.25	-1.25	-1.5	-2.25	3.25	-2	-1.75				17.96	0.25	2.75	-1.25	2	-1.5	1	1.25	2.25	3.25
			18	-0.5	0	-3.5	0.5	-1	-1.25	-0.25	2	-2.25				18	0	1.75	-2.5	2.75	0.25	1.5	1	5.5	3
			18.04	-1.5	-1.75	-2.5	-0.5	-1.75	0.75	-2.25	1.5	-0.5				18.04	-0.75	0.5	-2.25	1	3	1.5	0.5	4.5	0.5
			18.08	-3.5	-0.25	-0.5	-1.75	-2	-0.5	-3.75	1.5	0.25				18.08	-1.25	1	-0.5	-0.75	2.25	0.75	-1.25	3.25	-0.5
			18.12	-5.5	0.75	1.25	-3.5	0.75	-0.75	-4.5	2	0.75				18.12	-0.25	0.75	1	-1.75	1.5	-0.25	1	3	0
			18.16	-3.75	0.75	2	-5.5	0.25	-1.25	-4.5	0.75	0.5				18.16	-0.25	1.75	3.75	-3.25	0.5	-0.5	2.5	1	1
			18.2	-3.5	-0.75	1	-1.75	-1.75	-2	-3.25	-2.75	-0.25				18.2	1.5	1	4.25	0	0.5	-0.5	1.25	1	-0.25
			18.24	-5	-2.25	1.5	0.5	-0.75	-2	-2.25	-5.5	-1.75				18.24	1.5	-0.75	4.5	3	0	0.5	-0.25	-0.25	0.5
			18.28	-4.75	-4.25	-0.25	-2	-2.5	-1.75	0.5	-5.25	0				18.28	-1	-2.25	3	1.25	-1	0.5	3.5	-1.25	0.25
			18.32	-1.75	-6	0.75	-2	-1.5	-0.25	2	-4.25	0.75				18.32	1	-2.25	4.5	0.75	-1	0	4.75	-1	0.75
			18.36	-0.5	-3.75	1.75	-0.5	0.75	1.75	2	-2.25	0.5				18.36	4.25	-1.75	4.75	-0.5	1	1.5	5.25	1	1.75
			18.4	1.75	-2.25	0.5	-2	-0.25	2	-0.25	1.25	-0.75				18.4	4.25	0.5	3.25	-3	0.5	2.75	5.25	2.75	1
			18.44	2.5	-0.75	0.5	-2.5	0.5	-0.75	-3	0.75	-2.25				18.44	2.5	1.5	2	-0.5	0	0.5	3.75	2.25	0.5
			18.48	2.25	-0.5	-0.75	2	1.25	0.25	-5.25	-2.5	-1.75				18.48	1.5	3.75	1.5	3	0	0.5	-0.5	-0.5	0
			18.52	0.5	1	-0.75	4.75	0.75	-0.75	-2.75	0.25	-1.75				18.52	2.5	4.5	2.75	1.75	-0.5	2	-0.5	1	2
			18.56	-1	1.75	-1	4.5	0.25	-1.5	1.75	2	-4.5				18.56	1	-0.5	1.75	1.5	1.75	1	0	2.5	0
			18.6	-1.75	1	-0.25	2	0.75	-1.5	-0.25	0	-3.25				18.6	-0.75	-1.25	1	2.75	4	1	0.25	0.25	0
			18.64	-1.5	0	-1	1.5	1.75	-1	-1.25	-0.5	-0.5				18.64	-1.25	-1	-1.5	3.75	4.25	2.75	1.25	0.5	0.75
			18.68	1.25	-1.75	-2.25	-2	0.25	-0.5	0.25	0.75	0				18.68	1.25	-0.5	-3.75	2	0	1.5	2	1.75	1.25
			18.72	1.5	0.25	0.75	-4.25	-0.25	-2.25	-1.25	1	1.25				18.72	3	3	-2.5	0.75	-0.5	-2	0.5	-0.5	3
			18.76	1.25	2.5	4	-3.75	0	-4.25	-2.5	1.75	2.5				18.76	2.5	3	1.75	0.75	1.25	-2	-0.75	-2.75	3.5
			18.8	3.25	0	3	-3.25	-1.25	-2	-2.25	0.75	2.75				18.8	3.5	0.25	1.75	0	-1.25	0.25	-1.25	-1	5.25
			18.84	-0.25	-2	-0.25	-0.25	-3.5	-1	-0.25	-0.5	0.5				18.84	0.75	2.25	2	-1.5	-1	1.75	0.25	2.75	4.5
			18.88	-2	-1.5	-1.75	2.25	-2.75	-0.25	1.25	0	-4.25				18.88	-1.75	2.5	2	-1.25	-1.5	3.5	3.25	3.25	0.25
			18.92	-0.25	0	-1.75	1.75	-2	0	-0.5	-0.75	-4.5				18.92	-2.75	1.5	0.5	-0.25	-3.25	4.25	2.5	0.5	-3.25
			18.96	-0.75	1.25	0.5	0.75	-2	0.75	-4	-1.5	-2.75				18.96	-4	2.75	0.25	1	-2.25	3	2	1	-2.5
			19	-1.25	-1	-0.5	-2.25	-0.5	-0.25	-6.5	-1	-0.5				19	0.25	2.5	0.75	0	1.75	-0.75	0	-0.25	1
			19.04	-0.5	-1.5	-2.25	-2.5	-1.75	-0.5	-4.5	-2.25	-0.5				19.04	5.25	-0.5	0.75	-0.5	1.25	-1.5	-1.75	-3.5	2
			19.08	-2.5	-2	-2	-2.5	-1.25	1.5	-0.25	-2	-2.25				19.08	4	-2.75	0	-2.25	0	-1.25	-0.5	-2	1.5
			19.12	-2	-0.25	-0.25	0.75	-0.5	3.25	3.5	-3.5	-0.5				19.12	2.75	-2	0.5	0	1.25	-0.75	0.75	-0.5	3.75
			19.16	-1.75	-1.25	2	2	-0.75	3.5	2.5	-4	-1				19.16	1.5	0.25	0.75	0.75	2.75	1	-1	-1.25	-0.5
			19.2	-1.75	-2.75	3	-2.75	-0.25	-0.75	-1.75	-1.5	-2.25				19.2	1.25	0.25	2.5	-0.5	2.5	0.25	-5.75	0	-4.75
			19.24	-1.75	-1	1.5	-5	0.75	-2.25	-2.5	0.25	-2.5				19.24	1.75	-1.5	2	-2	1.5	0.25	-4.75	1.5	-4
			19.28	-0.25	0.75	-3.25	-3.25	3.75	-0.25	-0.5	0.25	-0.5				19.28	0.75	-0.75	-1.75	-2.75	4.25	0.75	-1.5	3.75	1.25
			19.32	0.5	2.5	-3.25	-0.5	2.75	-1	1	1.75	0.75				19.32	1	3.75	-2	-0.25	2.5	-0.75	-0.25	3.5	2.25
			19.36	0.5	0.75	-1	-1	-1	-1.5	-2	1.5	3.5				19.36	2.75	2	-0.5	1.25	-1.25	-0.5	-1.25	2.5	1.5
			19.4	1.75	-1.5	-0.5	1	-0.75	-0.75	-2.75	1	1.25				19.4	3.5	-1.75	-0.25	1	-3	1	1.5	0.5	0.75
			19.44	1	-3.25	1	3.25	-1	0.75	-0.25	0	-0.75				19.44	2.25	-1	0	2.75	-2.75	1.5	3.5	0	1.25
			19.48	-1.25	-3.5	2	3.75	1.75	-0.5	0.75	0	0.75				19.48	-3.25	1.25	1.25	3	-1.75	1	1.75	1.5	0.75
			19.52	-3.5	-4.25	-1.25	0.75	0.75	0.75	0	-1	2				19.52	-4.5	1	0.75	-0.25	-0.25	1	1.25	1.25	1.25
			19.56	-1.75	-4	-4	-4.75	3.25	-1.5	-0.75	-1.5	0.75				19.56	-1.5	-1.75	0.25	-0.5	3	0.25	0.75	-2	1.75
			19.6	0	-1.25	-2	-6.5	3.5	-1.25	-2.25	2	0.25				19.6	-1.25	-1.25	1.75	0.5	4.75	0.25	-1.5	0	1.75
			19.64	0.5	-1.25	0	-4.5	1	1.5	-1.75	2	1.25				19.64	1.25	-0.75	3	2	4	0	-3.5	1	1
			19.68	-1.5	-2.25	1.5	-3.5	1	0.5	0.25	0	0.75				19.68	0.5	-2.5	3	-0.5	2.75	-0.75	-0.25	0.5	0.5
			19.72	-2.5	-0.5	2	-2.5	-1	-1.75	-0.25	1.25	-2.5				19.72	-1.5	-0.25	1.75	-1	-0.5	-0.75	1	0.5	0.75
			19.76	0.25	2.5	0	-2.25	-2	-1.5	0.75	2.75	-3.5				19.76	-1	3.5	0.5	-0.75	-1	0.25	1.25	2.5	1
			19.8	0.75	2.75	1.5	-1	-4.75	1.5	4.5	0	-2.5				19.8	-1	1.5	-0.5	-0.25	-2.25	2.5	3.25	1.75	-1
			19.84	-0.25	2	-0.25	-1	-4	-0.75	3.5	-3	-1.75				19.84	-0.25	1	0.5	-1.75	-2.25	3.75	3	-0.5	-0.5
			19.88	-2	2.25	1.5	-2	-1.25	-3.25	-0.25	-3.75	-0.25				19.88	1	3	2.5	-0.5	1.75	2	1.25	-2.5	1.25
			19.92	-1.5	3	0.25	0.25	1.75	-1.75	-2.5	-1.75	0.75				19.92	3	1.75	-0.25	2.75	4.5	0.25	1.5	-1	1
			19.96	-1.25	2.75	-2.25	0.75	1.75	1.25	-3.25	-1.25	1				19.96	3.25	-0.75	-1.75	2.75	4.25	-0.25	1	1.5	2.75
			20	2	3	-2.25	0.25	0	1.5	-3.25	-0.5	-0.25				20	2	-0.5	0.5	0.75	1.5	-1.5	0	1.25	2.5
			20.04	2.75	3	0	1.5	-2.75	2.5	-1.75	-1.5	-0.5				20.04	-1	1	1.5	0.25	-1.5	0.25	-1.25	-1	0
			20.08	1.25	2.75	0	2.25	-2.5	2.75	-2.25	-0.75	-1.5				20.08	-1.25	3.5	0	1	0	1.75	-0.25	-2	-1.75
			20.12	2.25	2.5	-0.25	1.5	0	0.5	-0.75	-2.25	1.5				20.12	2.5	4.5	1	0.25	0.25	1.75	2.5	-5.25	-0.75
			20.16	3.25	1.75	1	-1	2	-1.5	3.25	-1.5	2.25				20.16	3.75	2.75	1	-1.5	1	2.5	3	-2.75	-0.75
			20.2	0.5	2.75	2.25	-2.25	1.5	-2	3.75	0.5	1				20.2	2.25	3.25	0.75	-2.25	1.5	2	1.25	0	-1.5
			20.24	2	1	3.25	1.5	-1.25	-2	2	1.75	0.75				20.24	1.5	2	-0.25	-0.25	0	-0.25	0.75	2.5	0
			20.28	3.75	2	2.5	4.25	-1	-1	-1	1.75	1.75				20.28	3.5	2.5	-0.5	2.25	-1.5	0.25	-0.25	3.5	0.75
			20.32	2	0.5	1	3	0.5	-0.75	-1	0	-0.5				20.32	2.75	2	-1.25	1.5	1	0.5	-0.75	1.25	-1
			20.36	0.75	-1.5	-1.25	0.5	4.25	-1.5	1.75	-0.25	-2.25				20.36	3.5	-1.25	-1.5	0	5	-1.25	0	-0.25	1
			20.4	1.25	-1.5	-1.25	1.75	5.75	-2.75	3	0.75	-1.25				20.4	3.25	-1.25	0.25	1	5.5	-3.75	-0.25	0.5	2.75
			20.44	2	0.25	1.75	0.75	2.75	-2.5	-0.5	-1.25	0.5				20.44	1	0.25	2.5	-1.5	-0.75	-2.25	-1.75	0.75	2
			20.48	-0.5	0	2.5	0.5	1.25	-0.25	-3	0.25	0				20.48	-0.25	1.25	3.75	-1.5	-3	-1	-1	1.5	0
			20.52	-2	0.5	1.25	0.75	1	1	-2.25	0.5	0				20.52	0.5	1.75	4.25	1.5	-2.75	-0.25	-0.25	2	2
			20.56	1	0	-1	-2.25	0	1.5	-0.25	-2	-1.5				20.56	0.75	1.25	1.75	0	-1.75	-0.25	2	-0.25	1.75
			20.6	2	-0.5	-1.25	-0.75	-0.5	3.25	1	-1.25	-1.75				20.6	0.25	2	0.75	-1	1.5	3	1.25	-1.5	2
			20.64	3	0	1.5	0.25	-1.75	3.5	1.75	1	-2.25				20.64	1.25	3.5	3.5	-0.75	2	5.25	2	0.25	2.25
			20.68	2.75	-0.75	2.5	1.25	-0.25	3.5	1.25	2.75	-1.75				20.68	2.5	2	3.75	0.75	1.5	5	1.25	0	0
			20.72	-0.25	0.25	2.25	3	0.5	3.75	0	2.75	0				20.72	1	1.25	2.5	3.5	-1.5	3.75	0.25	-1.5	-0.25
			20.76	0	3.25	1	0.5	-0.25	4	-1	1.25	3.75				20.76	0	3.25	1.25	2.75	-1.75	1	-0.25	0	1.75
			20.8	0.75	4.5	1.25	0	-1.25	1.75	-0.75	1.5	4				20.8	-1.75	2.5	1	1.25	-0.75	-0.75	-0.5	0.25	1
			20.84	1.25	1.25	4.25	1	2	1.5	0.25	-0.25	2.75				20.84	-0.25	1.5	2.25	0	1.5	0.75	0	1.25	0.5
			20.88	1.75	-4.25	4.25	1.75	2.5	1.5	2.25	1	2.5				20.88	1.5	-0.25	4.75	-0.5	2.75	3.25	2	2	3.25
			20.92	-0.25	-3.5	2	1	2.75	2.75	0.25	0.5	1				20.92	1.5	-0.25	5	-2.25	3.75	3.5	1.5	1	3.75
			20.96	-2.5	-0.5	-0.25	0.75	3.75	4.5	-1.25	1.25	-2				20.96	0.75	1.75	2.25	-1.25	4.25	2.75	0	1	3.75
			21	-1	1.25	1	2	3.25	4.75	0.75	1.75	-2.25				21	2.5	3.75	3.25	2.5	2.75	2.5	1.25	2.25	3.25
			21.04	-0.5	0.5	1.5	3.5	0.25	3.5	3.25	0.5	-2.5				21.04	1.75	2	0.5	6	-0.5	1.75	2.75	3.25	1.25
			21.08	1	0.5	2.5	2.5	0	2.5	4.5	-1.75	-3.25				21.08	-0.25	1	-1	5.25	-1.25	-0.25	2.25	3.25	-0.25
			21.12	1.75	-1	0.25	1.75	0.5	3	2.25	-0.5	0.5				21.12	0.25	0	1.5	4.25	2	-0.25	0.5	4.25	1.5
			21.16	0.75	-2	-2	1.25	1.5	3.75	0	2.5	3.5				21.16	1.25	-2	1.5	1.75	2.25	0	0.75	3.75	1.25
			21.2	-1	0.75	-0.25	-1	1.75	0.75	-0.75	2.75	3.5				21.2	2.25	-0.25	0	1	1.5	1.5	2	3.25	1
			21.24	-1.25	2.5	2.5	0.25	-0.25	-0.5	1.5	1.25	5				21.24	3	2	-1.5	4	0.75	0.5	0.5	2.5	3.25
			21.28	3.25	3.5	2.25	1.75	0.25	-1	1.5	0	2.75				21.28	5	3.5	0.5	3.5	-1.75	-0.75	0	0	3
			21.32	4	4.25	1.5	1	-1	-0.5	2	-0.25	1.5				21.32	4.25	3.25	1	-1.25	-0.75	-1.75	2.5	-2.25	0.75
			21.36	1.5	3.25	1.75	-1.5	-0.75	0	2.25	-1.5	-0.25				21.36	-0.75	1.5	1.25	-1	1.25	-2	4.75	-2	1.75
			21.4	2	2	3.25	-1.75	-1	1	0.25	-0.5	-0.25				21.4	-3.25	2.75	1.75	-0.75	0.75	-2.5	1.75	0.5	1
			21.44	1.75	0.75	1.5	-1.5	-0.25	1.5	1.5	0	1				21.44	-1	1.25	1.25	-0.5	-0.75	-0.25	0.5	-0.25	-1
			21.48	-2	-1	0.25	-2	1.5	2.25	3.75	1.25	1				21.48	-0.75	-0.25	0.5	0.75	0.75	1.25	0	0.75	0.5
			21.52	-2.25	0	3	-0.25	2.5	0.25	4	5.5	2.75				21.52	-0.5	-1.5	1.5	0.75	2.5	-0.25	-2	3.5	1.25
			21.56	0.25	0.25	3.75	0.25	1.5	-2.5	2.5	5.75	4				21.56	2	-0.5	3.5	1.25	0.75	-0.5	-2.75	4.5	0
			21.6	-0.25	0.75	1.25	2	-1.75	-2	5	1.75	2.75				21.6	2.25	-1.25	3.75	1.5	-3.5	-0.25	1.25	3.5	-1.5
			21.64	-2.25	-0.25	-0.5	3	-2.25	1.5	3.5	-1	-1				21.64	-0.5	-2	1.75	1	-2	1	2.25	1.5	-1.75
			21.68	-1.25	-3	2.75	0	-1.25	2.5	2.5	-1	-2.25				21.68	-2.75	-4.25	1.25	-0.75	-1.25	1	0.5	-0.25	1
			21.72	1.25	-2.5	2.25	-1.25	-1	4.5	1.5	1.75	-0.5				21.72	0	-4	-1.5	-1.5	-2.5	2.75	1.5	0.25	0.75
			21.76	1	0.75	0	-0.5	-0.5	2.5	-2	2.75	1				21.76	0.5	-0.25	-1	-1.25	-0.5	1.75	2.25	1.25	0.25
			21.8	-1.5	3	-1.25	0.5	0.5	0	-4.75	2.75	-1.5				21.8	-1	2.5	2.5	-0.25	-0.25	1.25	2.25	0	-0.25
			21.84	-0.5	3.75	-0.25	2.25	0.75	0.75	-2.75	0	-3.25				21.84	0.5	3.75	1.25	2	0.25	1.25	1.75	-2	-1.25
			21.88	2	1	-0.75	2	1.5	-1.25	1.25	0	-3				21.88	4	3	-0.5	2.25	-1.5	0.75	2.25	1.75	-1
			21.92	2	0.5	0	2	3	-1.75	2.75	0	3.5				21.92	4.25	2.25	0.75	3	-0.5	3	2	1.75	3
			21.96	0.5	3.75	2.5	2.75	1.75	0.25	1.5	0.5	6.75				21.96	2	2.25	2.75	2.5	-0.5	2.25	-0.75	-0.5	6.5
			22	1	3.25	2.75	1.5	0	0.75	0.25	-0.25	4.25				22	0	2.25	1.75	1.75	-1.75	-0.25	0.75	-0.25	4.25
			22.04	1.75	0.25	0.25	0.75	-2	0.5	-2.75	-0.75	1				22.04	-0.25	1.75	1.5	0.5	-2.5	-1	1	1.75	0.25
			22.08	3.5	-1.75	0.75	0.75	-1.75	-0.75	-3.25	1.25	-0.25				22.08	2	0	3	-1.75	-0.5	0	-0.75	3	-1.75
			22.12	4	0.25	0.5	-0.75	1.75	-2.75	0.25	0.75	-1.5				22.12	3.25	-2	0.25	-3.25	1.75	-3.25	-0.75	2	-1.5
			22.16	3	4.5	0.25	-0.75	5.25	-0.75	2.75	-1.25	0.75				22.16	1.75	-1.75	-1.5	0	3.5	-3.75	0.5	-0.5	2
			22.2	1.25	5.5	-0.5	0.25	2.5	0.75	3.5	-1	2				22.2	0.25	0.5	-1.25	1.25	2.75	0.5	0	-0.25	1.5
			22.24	-1.5	3.5	-3.5	2.25	1	3.25	0.75	1.5	1.5				22.24	-0.5	4.25	-2.5	1	2	4.75	-1	0.75	0
			22.28	0.25	1.25	-1.75	2.5	-0.25	5.5	1.5	1.5	0.75				22.28	-0.75	3.5	-3	-1.25	4	6.5	2.25	-2	0.5
			22.32	0.75	1	-0.75	3	0.25	3.5	3.25	1.25	0.5				22.32	0	3.25	-2.5	-0.5	3.5	3.5	4.5	-2.75	1.25
			22.36	2.75	0.25	-2.25	1	5	1	3.5	-1.75	1.25				22.36	3.75	-0.25	-3	1.75	2	0	2.25	-2.75	1.5
			22.4	3	-2.5	-1.25	1	5.5	0	2.25	-4	0.75				22.4	4.5	-3.5	-0.5	1.75	0.5	-0.25	0	-0.25	-0.25
			22.44	-0.25	-1.5	1.25	0	5.25	1.5	2.25	-2	-0.5				22.44	0.25	-3.25	2.5	-0.75	3.25	0.5	0.75	2.25	-0.5
			22.48	-4.25	0.75	0.5	1.5	2.75	1.5	2.5	1.25	0				22.48	-4.75	-1.5	1.25	-0.5	2.5	1.75	1.75	4.25	1.25
			22.52	-3.25	1.5	-3.5	5.5	-0.75	2.25	1.5	1	-0.5				22.52	-4.5	0	-2	2	0.25	2.75	0.75	3.75	1
			22.56	-0.5	-1.75	-3	4	0.25	3.5	-1.5	-0.5	1.75				22.56	-3	0.75	-1.75	2	-0.25	4.75	-2.5	3	-0.5
			22.6	-0.5	0.5	0	3.5	1.25	4	0.25	-0.75	0.75				22.6	-1.5	1.25	-0.25	0.5	-0.25	1.5	-1	1	-1.25
			22.64	1	2.75	3.25	2.75	-1.5	2.75	2.75	0	-0.5				22.64	-0.5	-1.75	3.25	-0.5	-0.75	-1.75	1.5	1.5	1.25
			22.68	2	1.25	2.5	0	-0.75	-0.5	3.5	2.25	-1.5				22.68	2	-2.25	4	0.25	0	-2.25	2	3.25	3.5
			22.72	-0.25	0.5	1.25	-3	0.75	-4.25	3.25	1	2				22.72	2.5	-0.75	5.25	0.25	1.25	-5	2.25	0.25	4.25
			22.76	-1	0.5	0.5	-2.25	0.5	-3.5	0.75	0.25	1				22.76	0.5	2	4	2	1.25	-2	2	-0.5	0.5
			22.8	-2.5	2	2	-0.25	0.25	2.5	0	0.75	-1.75				22.8	-1	3.75	2.5	0.75	1	3.75	2.75	-0.75	-2.5
			22.84	-1.25	2.5	2.5	0.25	0	4.5	2	2	-2				22.84	-1.5	1.25	1.75	0.75	-1	3.5	2	-0.25	-1
			22.88	0.5	-2.5	0.5	0	1.5	3.25	-0.5	1.75	-0.5				22.88	0.25	-3.25	1.5	-1.25	0.25	2.25	-1	1	0.25
			22.92	2.75	-3.75	-2	-0.5	2	0.25	-1.25	2	1.75				22.92	0.75	-1.75	-0.75	-1.25	1.25	1	-1.75	2	0.25
			22.96	3.5	-0.25	-4	0	0.5	-2.25	-0.75	0.25	1				22.96	0	1.25	-3.5	0	2	0.5	-2.25	2	-1.25
			23	1	-0.25	-2.75	2.25	1.75	-0.5	-3	0.25	0.75				23	-0.25	2.5	-1.25	2.75	0.75	1.75	-4.75	2	0.5
			23.04	0.75	-0.25	-0.25	3	3.25	-0.25	-2.25	0.25	1				23.04	0.25	1	0.5	4.25	2	0.25	-3.5	0.75	2.25
			23.08	0.25	-0.5	1.5	1.75	3	-1	3.5	1.75	2.25				23.08	-1.5	0.75	0.5	2.5	2.5	-0.75	0.75	0	2.25
			23.12	-0.5	0	1.25	1.75	0.5	-1.25	4.75	3.25	1.5				23.12	-0.5	0	-1.5	-0.75	1.75	1.25	5.25	1.25	-0.75
			23.16	3	-1.75	3.5	1	1	0.75	2.5	0.75	2.5				23.16	3.25	-0.75	-0.75	-1.25	1.5	2.5	4.25	2	2.25
			23.2	3.25	-0.25	2.75	-0.25	0	-1	1	-2.5	2.75				23.2	0.75	-0.5	0.25	0	-0.5	0.75	2.75	0.25	4.75
			23.24	-0.25	1	1.25	-0.75	-1.25	-0.75	-1.5	-1.25	0.25				23.24	-3	-1	-1.25	-1	-0.25	-1	1	1	2.75
			23.28	-2	-1	0.5	0.25	-1	-0.25	-3.75	0.5	0				23.28	-1.25	-1.5	-1	-1.5	-0.5	-2.25	-2.75	0	1.25
			23.32	-0.5	0.5	1.25	0.5	-1.75	-0.5	-3	0.5	-2.5				23.32	0.5	1.75	0	-0.75	-2	-3	-3.75	-0.5	-0.75
			23.36	-0.25	1.75	1.25	1.25	-0.5	1.5	-0.5	2.75	-3				23.36	1	2.5	0.5	3.75	-4	0.5	-1.5	3	-2
			23.4	0	-0.75	0.5	-0.5	-0.75	1.5	1.5	4.5	-3.25				23.4	2	-1.5	1.75	2	-4	1.5	0.75	4	-1.75
			23.44	0.5	-2.25	-2	-1.25	-2.25	-0.5	1.5	3.5	0				23.44	2.25	-2	4.5	0.25	-4	0.25	0.75	3	-1.5
			23.48	-2	-1.5	-2	0.5	-0.5	-1	-1.25	2.5	3				23.48	1	0.25	4.25	2.25	-1	0.25	-0.75	-0.25	1.75
			23.52	-1.75	1.25	-0.25	0.25	1.75	1.5	-3	1.75	0.75				23.52	0.25	-0.25	2.25	3	1.5	0.75	-1.5	-2.5	1.25
			23.56	0	4.25	0	-1.75	3.25	1.25	-1.5	1.5	-1.25				23.56	0.75	-0.25	0.25	-0.5	0.75	-0.25	-1.25	0.75	-2.25
			23.6	1	4	0.75	-2	3.75	1	0.25	-1.25	1.25				23.6	0.75	-1	-0.25	-1.75	-2	-0.25	-1	1.25	-2.75
			23.64	1.25	2.25	1.75	-2.5	5.25	2.75	1.25	-2.75	0.25				23.64	0.5	-1.25	-2	-2.75	-1.5	1.25	0	-2	-1.75
			23.68	1.5	1	1.5	0	4	1.75	1.25	-1	-3.5				23.68	-0.75	-0.75	-5	-1.75	1	1.5	0	-2.25	0
			23.72	1.25	-1	2.5	0.25	1	0.5	1	0	0				23.72	-1.25	-1.5	-3.25	-1	0	-0.75	-0.25	-2.5	4
			23.76	-3.25	-2.75	1.5	-0.75	3	-0.5	2.5	-1	3.75				23.76	-1	-3	-2.5	-1	1.75	-2.5	0	-2.75	4.25
			23.8	-4.25	-1.5	0	-2.5	2.5	1.25	1.5	-0.25	1.75				23.8	-1.5	-1	-3	-3	1.5	-0.75	-0.25	0	0.25
			23.84	-2.5	0.5	0	-2	-2.5	2.25	1.25	-1	0.5				23.84	-2	1.75	-2.5	-4.25	-0.75	1.75	0.25	0.75	0.5
			23.88	-3	0.5	0.75	0.5	-3.5	0.5	2.25	1	-1				23.88	-4.5	1	-1	-3.5	-0.5	0	2	0.25	-0.25
			23.92	-3	-0.5	4.25	2.75	-0.25	0.5	0.25	0.75	-0.25				23.92	-3.75	0.25	1.25	0.5	1	-3.75	3	0.5	-2.25
			23.96	-0.75	-1	4	5	3.5	0.25	2	-0.5	3.5				23.96	-3	0	0.75	2	4	-3.25	2.5	0.25	-1.75
			24	0	0	1.75	2.5	4.25	1	1.75	-1	3.5				24	-0.5	0.75	-0.25	0.5	4.75	-2.5	1.75	-0.25	-1
			24.04	0.25	0	0.5	-0.5	-3	3.25	-1.25	0.75	1.25				24.04	0.5	0	-0.75	-0.75	0	-0.75	-0.5	1	-0.5
			24.08	-2	0	0.75	-0.25	-6	0.75	-2.25	-0.25	0				24.08	-2.5	-1.25	-1	-0.25	-4.25	0.25	-2.25	0	0.5
			24.12	-0.75	1.25	1	2	-2.25	-1	-2.75	-0.5	1.25				24.12	-3.25	-1.5	0	1	-4	-0.75	-3.5	-0.75	1.25
			24.16	0.5	1	0.5	2	1	-0.25	-1.25	-2.25	2				24.16	0	1.75	2.5	2.25	-1.75	-1.25	-0.5	-2.5	0.5
			24.2	0.25	0	1	3.5	-1	-1.25	-2.25	-2.5	-1.5				24.2	2.75	3.75	2.5	1.25	-2	-0.75	-2.25	-3.25	-5
			24.24	-0.25	0.5	0	3.5	-2.25	-3	-1.25	0.25	-2.25				24.24	2.5	0.5	-2.75	-0.5	0	-1	-3.25	-0.25	-3
			24.28	0	3	-0.75	-1	0	-2.75	3.75	5.5	-2.5				24.28	1	-0.5	-2.75	-3.5	1.5	-3.5	-0.25	3.5	0.25
			24.32	0.5	2.5	-0.5	-2.5	3	-0.75	4.25	6.75	0				24.32	-1	-0.75	-0.5	-3.5	1.25	-2.5	3.75	3	0.25
			24.36	1	0	0	-1.75	2.25	1	1.75	3.25	0.25				24.36	-1.75	-3	1.5	-3.75	-0.5	-1.25	1.75	1	-3
			24.4	-0.5	1.75	-0.75	-0.5	1.5	3.25	0.5	-1.75	1.75				24.4	-1	-2	2.25	-2.25	-0.75	0.25	1.25	-1.5	-1.75
			24.44	1.5	0.75	-0.75	0	3.75	2.25	-0.75	-3.25	3.25				24.44	1.25	-2.75	1.25	2.25	-1.25	-0.5	0	-1	3.25
			24.48	4.75	4	2	1.25	0.5	1.25	-0.5	-0.25	2.25				24.48	2.75	-0.5	1.25	2	-2.75	-0.25	-2.75	-1.5	3.75
			24.52	5.25	3	3.5	3	-1.5	3.5	3	0.75	1.5				24.52	2.25	1.5	1.75	1.25	-3.75	1.75	-2	0	3
			24.56	3.5	1	2.25	0.5	-2.5	4	2.25	-1.75	-1				24.56	1.25	1	2	0.25	-3.5	-0.75	-0.5	-1.5	-0.75
			24.6	1.5	2	-1.25	0.75	0.25	2.75	0	-2.25	-3				24.6	-0.25	1.5	0.25	0	0.25	-1.5	-0.5	-4.5	-1.5
			24.64	-0.75	0.5	-2.75	-1	0.5	0	-3.5	1.75	-1.25				24.64	-0.75	1	-2.5	0.25	2.5	0.25	-1.5	-2.25	0.25
			24.68	-0.25	-0.5	-3.5	-3.25	-0.75	-1.75	-5.5	0.25	-0.75				24.68	-1.5	-0.75	-3	-1.75	-1.5	0.5	-2.75	2.25	-1
			24.72	-1.75	-0.75	-2.5	-2.75	-0.5	-1.25	-2.25	-2.5	-1				24.72	-2.25	-1.75	-4	-4.25	-3.25	0.25	0.75	2.5	-2.25
			24.76	-3.5	-0.75	0.5	-1.75	-0.75	-1.75	-0.5	-2	0				24.76	-3.75	-1	-3.25	-4.5	-1.75	-1.25	3.25	2	-1.25
			24.8	-4.25	1.5	3	1	-1.5	-0.25	0.25	-1.75	-0.75				24.8	-5.25	-0.75	1	-3	-0.5	-0.75	2	0.25	-1
			24.84	-3	-1	2	1.5	0.5	2	1	-1.5	-1.75				24.84	-3.75	-4.25	2.75	-1	2	-0.5	2.75	-2.25	-2.75
			24.88	-1.25	-2.75	0.75	4	3	3	-0.5	1.75	-0.75				24.88	-3.75	-4.5	-1	3.75	0.75	-0.25	1.75	0	-0.25
			24.92	-1.5	-3.75	1.25	2.75	3.5	3.25	-3.25	2.25	-0.75				24.92	-5	-5	-3	3	-0.75	-0.25	-3.75	3	2.25
			24.96	0.75	-1.75	2	0.25	1.75	1	-2.75	3	-0.5				24.96	-0.75	-3.25	-2	-3	-1	-1.75	-7.25	0.25	1
			25	2.75	0.75	4	0	0.25	1.25	-1	7	-0.5				25	0.5	0	0.5	-4.25	-1.75	-0.5	-5.75	-3.75	-0.75
			25.04	4	1.75	3	1.5	2.5	1.25	2	4.25	-0.5				25.04	1.75	1.75	0.75	1	0.25	1	-1.25	-3.75	-1.5
			25.08	1.75	2	2.25	-0.25	3	1.25	4.75	0	0.75				25.08	0.5	-1	1.75	0.5	-0.25	-2.75	1.25	-2.5	-1.25
			25.12	-0.75	3.5	1	-2.5	0.5	2	2.5	-1.25	3.75				25.12	-1.75	-3.5	1.75	-4.25	-2.5	-5	0.25	-0.5	2.25
			25.16	-1.25	4.75	-4.75	-2	2	1.25	2	-0.75	4.5				25.16	-4	-3	-2	-5.25	-3	-2.25	-0.25	-1	3.75
			25.2	1.75	5.25	-3.75	0.25	2.5	-0.5	2.75	-0.25	3				25.2	-2.5	-3	-3.25	-2.75	-2.25	-1	-1	-2	1.75
			25.24	1.5	2.5	-3	2.75	1.5	-1	4.5	-2.5	1.25				25.24	-1.75	-1.75	-4.5	-1	-2.25	-0.25	-1.25	-4.5	-1.5
			25.28	1.75	1	-2.25	4	3	-0.25	0.75	-2	3				25.28	1.5	-0.25	-3	0.5	0.25	-1.75	-0.75	-4.25	-2
			25.32	1.5	0.5	1.5	2.25	3	-0.25	0	0	1.75				25.32	0.25	-1	1.5	0.5	1	-2	-0.25	-2.5	-3
			25.36	1.75	0.5	4.75	-0.75	3.25	0.25	2.75	0.5	-0.75				25.36	-2.5	0	1.5	-1	-0.5	-2.25	0.5	-1	-3.25
			25.4	0.75	-0.75	3.25	-3.5	3.5	-0.25	1.75	0	-0.75				25.4	-3.75	-0.5	-1.5	-4.75	-2	-3.75	-1.5	-1.5	-4
			25.44	0.5	0	1.25	-1.25	2.5	-1.25	1.75	4	0.5				25.44	-3.75	-1.5	-2.75	-6	-1.25	-3.75	-1.5	0.25	-2.5
			25.48	1.5	2	2.25	-0.25	0.25	0.75	-0.75	6	2				25.48	-0.5	-0.75	0	-3.5	-0.5	-2	-2	-0.5	-1
			25.52	2	2.25	2.75	1.5	-0.75	3.5	-0.75	1	1.75				25.52	-1	-0.75	1.75	0.75	-0.75	-1	-1	-2.5	-1.25
			25.56	0.5	3	2	2	1	5.5	1.75	0.25	2.25				25.56	-1.75	0.25	0	3.25	0.5	1.75	1.75	-1.75	0
			25.6	2.25	0.5	0.25	3	-0.5	2.25	0.25	1.5	2				25.6	-0.25	-1.5	-1.75	2	-0.75	2	0.5	-0.5	2.25
			25.64	3.75	-2	0	1.25	0.5	1	0.5	3.5	2.75				25.64	2.25	-0.5	-0.25	-2	-1	-0.25	-1.75	0.25	2.25
			25.68	1.25	0.75	0.5	0.25	2.75	0	2.25	4.25	0.25				25.68	1.75	1.25	0	-3.5	-0.5	-1.5	-1.75	-0.75	0.5
			25.72	-3	2.75	0.25	0.5	3.5	-0.75	0.75	2.25	0.75				25.72	-2	0.5	-1.25	-3.5	1.25	0	0.5	-2.25	-0.5
			25.76	-1.5	3.75	-0.5	1.5	-0.25	-1.25	-1.25	0.25	-0.75				25.76	-3	0.5	-1.5	-1.75	1.75	3	-0.25	-1.25	1.5
			25.8	-0.75	4	0.25	0	-2	0.25	-2	2	-0.5				25.8	-3.25	1	1.25	-0.25	-1.25	3.25	-1.75	0.75	3.5
			25.84	-1.5	4.5	1	-0.5	0.75	0.5	-0.75	5	-1				25.84	-4	1	0.5	-1.25	-1.25	1	-1.75	1.5	1
			25.88	0.5	1.75	-2.5	3.25	1.25	-0.75	0.75	2.25	-1.25				25.88	-3.5	0.25	-2	1	-1.75	-0.25	-0.25	0	-0.5
			25.92	1.5	1.5	-3.75	3.75	0	-0.5	-0.75	-2.75	-1.25				25.92	-1.5	-0.25	-0.75	3.25	-2	-0.5	-2	-3	-1.5
			25.96	2.5	2	1.5	2.75	-1.5	2	-3	-5.5	-1.5				25.96	0.25	-0.75	0	-0.25	-2.75	-1	-3.75	-5.75	-2.25
			26	3.75	3.5	3.5	0.75	-1	2.5	-1.75	-2.75	-1.25				26	1.5	-0.25	-1.5	-3.75	-2.25	-1.25	-2.75	-3.75	-3.25
			26.04	3	1	2	-0.25	0.5	0.5	0.5	-2	-0.5				26.04	1.25	-1	-1.5	-3	-0.75	-2.5	0.25	-2.25	-6
			26.08	1.75	-0.5	0	-2.5	5.5	-2.75	1.5	0.25	0				26.08	3.25	-1.75	-0.5	-4.25	3.25	-4.25	2.25	0	-2.75
			26.12	0.25	-1	-0.75	-1.5	7.5	-1	1.25	3.25	2.75				26.12	0.5	-2.5	0	-1.5	4.75	-3.75	1.75	1.25	2
			26.16	-1	-3.25	-0.5	0.5	8.25	1.5	1.75	1.5	2.75				26.16	-4.75	-2	-1.5	0	5	-2.75	1.25	2.25	2.75
			26.2	-1.5	-2.25	0	0.25	2.75	5	0.5	0.75	-0.5				26.2	-4.75	-0.75	-5.25	-1	-0.25	-1.5	1	2.25	0.75
			26.24	-1.5	1.5	2.25	-2.25	-0.5	2.75	0.25	-1.75	1.25				26.24	-3.75	2.75	-3.75	-1.75	-2.25	0	-3	0	-0.25
			26.28	0.25	1.75	3.25	-3.5	-1	0.75	-0.5	-4.25	2.75				26.28	-0.75	3	2.5	-2.5	-4.25	0.75	-4	-4.5	-0.75
			26.32	2.25	0	3.25	-2.5	-2	1.5	-1	-2.75	0.5				26.32	3	0	4.25	-3.25	-5	-0.75	-3.25	-5.5	-3.25
			26.36	4	-1.5	-2	1.5	0	0.25	-0.5	0	-1.25				26.36	2.75	-4.5	0.75	-0.5	-3	-0.5	-1.75	-3.5	-5
			26.4	3.5	-0.75	-6.25	3.25	0.75	1	1.25	-0.25	0				26.4	0.25	-3.25	-2.5	1.5	-1.25	3.25	-1	-1.25	-0.25
			26.44	1.25	-0.75	-4	2.25	1.5	3.5	2	2	1.75				26.44	-1.25	-2	-4.5	0.75	0.75	4.75	-0.75	0.75	0.75
			26.48	-1	-0.75	0.5	2.5	-1	3.5	2.5	5.25	4.5				26.48	-1.75	-4	-0.25	0.75	-2	1	-0.5	3.25	2.5
			26.52	-1	0.75	1.5	3	-2.5	3.5	1.75	5.5	2.75				26.52	-1.75	-4.25	1.75	0.5	-4.5	-1	0	1.25	3
			26.56	-2.5	-0.75	2.25	2	0.25	2.25	2.5	4.25	1				26.56	-1	-3.75	0.75	-1.75	-2	-1.75	-0.25	0	1.5
			26.6	-0.5	0	5.5	0.5	4.25	1	5	1.25	0.25				26.6	1.25	-0.75	2.75	-2.75	1	0.5	2.25	-1.75	-0.5
			26.64	1.25	3	5.75	0.25	3.5	-0.5	4.25	0.25	0.25				26.64	0	1	4.5	-2	-0.5	-0.25	0.75	-2.75	-3.5
			26.68	2.5	2.5	2.25	1.25	1.5	1	4.25	-0.25	-2				26.68	-2.75	-2	3	0	-1.5	-0.75	-0.5	-2	-5
			26.72	1.5	1.5	-2.25	1	1.5	0.5	2.75	1.5	-1.5				26.72	-3	-2.5	-0.25	-0.75	0.5	-2.75	-2	-0.25	-4
			26.76	-0.25	2.75	-3.5	-1	1.5	-2	-1.25	0.5	0				26.76	-1.25	0	-1.75	-4	1	-2.75	-4.5	-2	-2.5
			26.8	0	3.25	-3.25	0	0.75	1.5	-2.75	-1.5	1.5				26.8	0.75	1.25	-1	-4.5	0	-0.5	-4	-4	-1.5
			26.84	2.75	0.25	-2.25	2.75	-0.25	1.5	-3.5	1.5	3				26.84	1.75	0.5	-3	-0.5	-1.75	-2.75	-4.75	0.5	-1
			26.88	2.75	1	-2.25	2.5	-2.75	-0.5	-0.5	0.75	3				26.88	-0.25	1	-4.5	0.5	-1.5	-4	-4.5	0.75	-1.5
			26.92	0.75	2	-1	-0.5	-4.25	0.75	1.25	-1.25	0.5				26.92	-2.75	-1	-3.5	-1.5	-1.25	-1.75	-3.5	-0.75	-1
			26.96	-0.75	0.75	-1.25	0.75	-0.75	1.75	4	0.75	-3.25				26.96	-1.5	-2.75	-2	1.5	0.75	0	1	-0.75	-1.75
			27	-1.5	-1.75	-1	1.5	2.75	2	3	2.75	-4.75				27	-0.25	-2.25	0.25	0.75	1.5	-0.25	2.25	-1.25	-2.75
			27.04	-3	-0.25	1.5	0.5	1.5	1.25	0.75	1.75	-3.75				27.04	-1	-1.25	-1	1	-1.75	-1	-0.5	-2.25	-1
			27.08	-0.5	2	2.5	-1	0.25	-1.75	0.5	-1.5	-0.5				27.08	0.75	0.5	-2.75	1	-2.75	-0.75	-0.5	-4.5	-1
			27.12	2	1	0.75	-1.25	-0.5	-3.25	2.5	-1	2				27.12	4	-0.25	-4.25	0	-3.25	-1.5	1	-5.25	-1
			27.16	0.75	0	0	-1.5	-1.5	-0.25	1.5	1.75	1				27.16	3.75	-2.25	-2.5	-0.75	-4.5	0.5	1	0	-0.75
			27.2	1.25	-2.25	-0.25	-2	-0.5	2.75	-4.75	2.75	1				27.2	2	-3	0	-1.25	-3	1.75	-3.75	4	-1.75
			27.24	1.75	-3	-0.75	-3	0.5	2.75	-6	2.25	0.75				27.24	0.75	-2.75	0	-2.5	1.5	2.75	-5	2.75	-2.25
			27.28	2	2.25	-3.75	-4.25	-3.25	2	-5.25	2.25	0.5				27.28	-0.75	-1.5	-1.5	-3.75	1.25	6.25	-3.75	-0.25	-2
			27.32	2	4.5	-3.5	-3.75	-4	-1.5	-1.75	1.25	-2.5				27.32	-2.75	-1	-3.25	-3	-0.25	2.25	-2.75	-3.25	-2
			27.36	1.75	0.5	-2.25	-1	-0.25	-1.5	2.25	-3.75	-2.75				27.36	-3.25	-1.75	-3.5	-1.25	0.25	-2.25	-1.75	-6	-1.75
			27.4	4.75	-2.5	-0.5	0	0.75	-0.25	3	-0.25	-0.25				27.4	-0.75	-3.25	-2.25	-2.5	-2.5	-3.5	2.25	-1.75	0.5
			27.44	4.75	-0.75	0.5	-0.75	-0.5	1.25	2.5	2.5	3.5				27.44	-0.25	-0.5	0	-4	-4.25	-3	2	1.25	2.5
			27.48	2	0.75	0.25	0	-1.25	2.5	2.25	2	3.5				27.48	1.25	0.75	1.5	-2.75	-0.75	-0.75	-0.5	-1	2
			27.52	0	-0.75	-2	1.75	-0.75	-1.75	3.75	0.75	3				27.52	1.5	-1.75	-1	0.5	0.25	-1	0.5	-3	-0.5
			27.56	-3.75	0.25	-1.25	-1	1.5	-2.25	3	1.75	0				27.56	-1.25	0.5	-2	0.25	-2.75	-0.5	0.25	1.5	-3
			27.6	-4.5	0.75	0.25	-0.25	1.5	0.5	0.75	1.5	-1				27.6	-5	2.75	-0.5	1	-2.5	-0.75	0.5	5.25	-2
			27.64	-3.5	-0.25	-0.75	2	0.5	1	1.5	1	-1.25				27.64	-4.5	-0.5	-1.5	1.5	0.25	-1.5	1	4	-1.75
			27.68	-1.75	-0.25	-1	1	0.75	1	0.75	-2.5	-2.25				27.68	-4.25	-2.75	-1.5	0.75	2.75	-1.5	1.25	0.25	-2.75
			27.72	0	0.5	-0.25	-0.25	1.25	-1.75	0.75	-3.5	-1.5				27.72	-2.5	0.5	-0.5	-1.25	1.75	0	-1.25	-1	-2.5
			27.76	2.75	2.25	0	-2	0.5	-3.25	0.75	-1.25	0				27.76	0	2.75	0.25	-3	-1	-0.25	-3.25	0	0
			27.8	2.5	2	-0.5	1.5	-1	-1	0.5	0.75	-1				27.8	-0.25	1	0	-0.25	-3.75	0.25	-2.25	-0.75	0.5
			27.84	-1.5	-2.25	1	4.75	-3	0.75	1	0.75	-4.25				27.84	-1.25	-3.25	-0.75	2.5	-5	0.5	-1.5	1	-0.25
			27.88	-0.25	-1.75	0.75	2.25	-1.75	2.25	0.5	1.5	-4.25				27.88	0	-2.25	-2.25	-0.25	-1.25	0	-1.75	1	-1
			27.92	-0.5	-1	0	1.25	1	1.5	0.5	2	-2.25				27.92	-1	-1.5	-4.25	-2.25	0.75	-0.5	-1.25	1.25	0
			27.96	-1.5	1.5	0.5	1	0	1.75	0.75	0.75	0.25				27.96	-2.25	-2.25	-2.75	-0.75	-1.5	1.5	0.5	-0.25	0.5
			28	-1.75	1.5	1.25	0.75	-1.75	1	1.5	-2.5	-0.5				28	-1	0.25	0.5	0.25	-2.75	1.5	0.25	-4.25	-3
			28.04	-1.5	2.75	2	1	-1	-0.5	0.25	-3.25	-1.25				28.04	0.25	2	0.25	0	-2.5	1.5	-1.5	-4.25	-4.75
			28.08	-1.75	2.5	-0.5	1.25	-0.5	1.5	-1.5	-1.5	-1.75				28.08	0.25	2	-2	1.5	-2.25	1.25	-1.75	-2.25	-3.25
			28.12	-3.5	0	0	-3.5	-3.25	2.25	-1.75	-0.75	-1.25				28.12	-2	-0.5	-0.75	1	-4.25	-0.5	-4	0.75	-1.5
			28.16	-1.5	-1.5	-0.25	-3	-4	-0.5	-4	-1.5	1.75				28.16	-0.25	-1	2	0	-5	-0.25	-4.5	-0.5	0
			28.2	-0.5	0.25	-0.5	-1.25	-1.5	1	-3.25	0.75	1.25				28.2	-0.25	0	3.25	-2.25	-2.75	2.75	-2.25	-0.75	1.25
			28.24	-2	-0.25	1.75	-0.75	-0.75	3.25	-1.5	2	-1.5				28.24	-1.25	-0.5	2.5	-3	-1	3.5	-1	1.75	0
			28.28	-0.25	-2	4.5	-1	0.5	0.75	0.75	2.25	-1.75				28.28	-0.25	-1.25	3	-3	0.5	1.5	0	3.25	0
			28.32	2	-2.75	5.25	-3.5	1	-1.75	2.25	2	-2.25				28.32	2.25	0.5	3.25	-3.25	0	-0.75	0.25	2.75	-1
			28.36	-1	-2.25	2	-2.75	2.75	-2.5	2	-0.25	-1.5				28.36	4.75	-1.5	1.5	-2.5	1.25	-2.75	0	1.5	-2.25
			28.4	-3	-1	-0.25	-3	1.75	-1.75	0	-0.25	3				28.4	4.75	-2.25	0	-3.25	1.25	-2.75	0.25	0.25	0.5
			28.44	-3.25	-0.75	0	-2.5	1.25	0.25	-2.5	0.25	4.75				28.44	-0.25	-2.25	-0.75	-2.25	1	-2	0	-0.5	2.25
			28.48	-2	-2.25	2.5	-0.25	-1.25	2.75	-3.5	-2	0.75				28.48	-3.25	-3.25	-1.25	-0.5	0.75	-1	-2	0	0.5
			28.52	-2.75	-0.25	3.5	-0.5	-0.5	0.25	-2.25	-2	-2.25				28.52	-2.25	1	1.75	-0.5	0	-1	-2	-1.5	0.25
			28.56	-1	2.25	0.5	0	1	-3	2	-1	-3.25				28.56	1.5	5.5	1.75	-0.5	-0.75	-1	0.5	-2.25	-1.25
			28.6	1	1	-1.75	-0.5	0.25	-2	1.25	-2.25	-4.25				28.6	3.25	3	-0.75	-1	-3.5	-1.75	1.25	-3	-3.75
			28.64	0.75	-1.75	-3.25	-1	0.25	1.75	2	-4.5	0.75				28.64	0.5	-1.25	0	1	-3.25	-2	0.75	-4.25	-2
			28.68	2.25	-1.25	-1.5	0	-1.25	3.25	1.75	-1.75	0.75				28.68	-1.75	-2	1.75	1	-1	-2.75	1.25	-2.25	-1.25
			28.72	1.75	-3.25	1	-2.25	-2.75	1.5	0.25	-0.75	-1.25				28.72	-3.5	-2.5	-0.5	-2.5	-0.5	-2.5	0.5	-1.25	-1
			28.76	0	-5.75	-0.75	-3	-1.5	-2	-3.25	0.25	-0.25				28.76	-3.75	-2.25	-3	-2	-1.25	-3	-2.5	1.5	0.5
			28.8	0.5	-3.75	-1.75	0.5	-0.5	-3.25	-5	3.25	0				28.8	-1.25	-2.5	-1.75	-0.5	-1.25	-3.25	-5.25	2.75	1
			28.84	-0.25	-0.25	-1.25	3.25	1	-2	-2.5	2.25	0.5				28.84	-1.25	-2.25	-1.5	-0.75	1.5	-0.75	-3.75	1	1.5
			28.88	-2.25	0	-0.5	2.25	-0.5	-1.25	0.25	0.5	2				28.88	-3.25	-2.75	-1.5	0.25	0	1.5	-2.75	0	0.75
			28.92	-1.25	-2.25	-0.75	-2	-1.5	1	3	1	2.75				28.92	-2.25	-3.25	1.5	0.75	-2	1.5	0	0.5	1.5
			28.96	0	-3	1	-2.5	-0.5	1	2.5	-0.5	2.5				28.96	1.25	-3	4	0.25	-1.25	1	2.75	-2.25	2.25
			29	-2	-4.75	0.25	-2	-2.25	2.25	-2	-2.25	2.5				29	0.75	-3	1.5	-0.5	-1	1	-0.75	-3	2.25
			29.04	-2	-1.75	1	-2.75	0	1.25	-3.5	-4.5	-0.75				29.04	-1	-1.5	0.75	0	-1.75	-1	-3.25	-2.5	-2.75
			29.08	-1	1.5	1.25	-2	-1	0	0.5	-3.5	-2.75				29.08	-1.25	-1.25	1.5	-2	-3.25	-3.25	-2	0	-3.5
			29.12	-0.75	3.75	-3	-1.75	-2.25	0.25	2.75	-1	-2.75				29.12	-1.75	0.75	0.25	-2	-1	-2	-2	2	-1.75
			29.16	-0.5	2	-4.5	-1.75	-0.5	1.25	0.5	0.25	-2.75				29.16	-2.5	0.5	-1.5	-1.75	2	2	-0.75	0.5	-1.75
			29.2	-1	-1.5	-3.5	0.75	2.25	-0.75	-2.25	-1	-2.75				29.2	-1.75	-1.25	-1.5	-1.25	1.75	0.25	-0.25	-2.75	-0.75
			29.24	-0.75	-4.75	-2.75	2.25	0	-4	0.25	-3	-2.25				29.24	-1	-3.75	-0.5	-0.25	-0.75	-3.75	1.5	-1.75	-1.25
			29.28	-2.25	-8.25	-1	-0.25	-2.25	-5.25	3	-1.25	0.25				29.28	-1.25	-6.5	-1.75	-0.75	-3.25	-4	5.25	1.25	0.25
			29.32	-2	-2.75	-1.75	-1	-4.25	-4	3.75	1.25	-1.75				29.32	-2	-4.5	-3.75	1	-3.75	-3	4.25	1	2
			29.36	1	0.75	-1	-0.25	-3	-2.25	1.25	-0.25	-1.5				29.36	-2.75	-3.5	-2.5	2.25	-1.5	-2.75	0.25	-1.5	1
			29.4	1.5	3.25	-1.25	-1.25	-2.75	-0.75	0.25	-1.5	-2				29.4	-2.5	-2.5	-0.25	-2.5	-2.25	-2.5	-0.25	-0.25	-2
			29.44	-0.75	2.5	1.25	-1.5	-1.5	-0.5	-2	-0.5	-1.5				29.44	-1.75	-1.25	-2	-2.75	-2.75	-4.25	-1	2.75	-2.25
			29.48	-1.75	0.25	1.5	-1.5	1	1.25	-3.75	-3.25	-0.25				29.48	-2.25	-0.75	-3.5	-1.75	-3	-2	-5.25	0	-1.5
			29.52	0.25	0.5	-0.25	1.5	-1.5	2.5	-4.25	-1.75	-2				29.52	-1	0.75	-2.5	0	-3.25	-1	-7.5	-2.75	-1.75
			29.56	1.75	1.75	-4	2	-2.25	3.5	-3.5	-0.5	-3				29.56	-0.5	4	-3	-0.25	-3.75	0.5	-4.75	-3.25	-1.5
			29.6	0.75	1	-3.5	-0.25	0.25	4.5	-3.5	-0.25	-5.25				29.6	-0.25	4	-0.5	-2.25	-2.25	3	-4	-4	-3.5
			29.64	-1.75	0.75	0	-0.75	-2	2.75	-1.75	-1	-3.75				29.64	-2	2.25	0.75	-4	-1.5	5	-2.75	-2	-1.75
			29.68	0.5	0.25	0.25	-2	-2.75	0.25	0.5	0.75	-3.5				29.68	0.25	0.25	-0.75	-2.75	-1.25	2	-1	-0.25	-1.75
			29.72	2	-1.5	-1.5	-5.25	0.25	0.25	0.25	0.75	-4.5				29.72	3.25	-2	-2	-3	-0.75	0.25	1	-0.75	-1
			29.76	0.5	-1.75	-2.5	-2.75	-1	-0.75	-1.25	0.75	-4.75				29.76	2.25	-2.25	-3.25	-3.5	-1	-1.25	1.5	0.75	-2.25
			29.8	-1.25	-2.5	-0.25	1.25	-1	-2.5	-2	-1.75	-2.5				29.8	-0.25	-1.5	-3.25	-1	0	-2.25	1.25	1.5	-2
			29.84	-0.25	-0.5	-0.25	1.5	0	-3	-1	-2.25	-1				29.84	-3	0.25	-0.5	0.25	0	-1.75	0.25	-0.25	-1
			29.88	1	-0.75	-1.25	3.25	-0.5	-2.5	0	-2	-0.25				29.88	-2.75	0	0	1.75	0.25	-3	-0.75	-0.75	-1.5
			29.92	1	-1.75	0.25	4	0	-2.25	1	0.75	-0.25				29.92	0.25	-1.75	-0.5	1.5	0	-3	-2.5	-1.25	-1.25
			29.96	-0.25	-1.5	3.25	0.25	-0.25	-0.75	0	2	1				29.96	1	-0.25	0	2.25	-2.25	-1.25	-3	-0.5	0.75
			30	0.25	-2.5	1.75	-1	-1.75	-0.25	-1	-0.75	3				30	1.5	-2.25	-2.25	-1.25	-1.75	-0.5	0	-2	2.25
			30.04	-0.5	-0.75	-0.25	-0.75	-0.75	-0.5	0.5	-0.25	1				30.04	-0.75	-2.25	-1	-1.25	-0.25	-1.5	2.25	-1.5	0
			30.08	-2.75	0	-1.5	1.25	1	0.5	1.5	0.25	-2.5				30.08	-2.75	2	0.75	-1.75	-0.5	-0.75	2.25	-0.75	-2.75
			30.12	-2	-2.25	-0.75	2.75	2	1	1.25	-1.5	-3				30.12	0.5	1.75	1.75	-0.75	-0.25	0.75	1.25	-2	-3
			30.16	-0.75	-3.25	-0.5	3	0.5	0.5	-1.75	-2.25	-4.25				30.16	1.75	-0.5	1.25	0.25	-0.5	0.5	-1.5	-3.25	-1
			30.2	-0.25	-2.25	-2	1.25	0.75	2.5	-2.25	-2.25	-1.75				30.2	1.75	-4.25	-2	0.25	-1	1	-2.75	-3	-0.25
			30.24	1.25	-3	-2.75	-0.25	2	0.75	-1.25	-0.5	-1.25				30.24	3	-7	-4.25	0.5	0.5	1.25	-3.5	0.75	-3
			30.28	0.5	-5	-3.25	0.25	1.25	-0.5	-1.5	-0.25	-3.75				30.28	1.75	-7	-3.75	0.5	-0.75	0.5	-3.75	0.75	-4.25
			30.32	-1.5	-3.75	-0.75	-1.5	-2.25	1.5	-2.75	-0.5	-4.25				30.32	-3	-2.25	-2.75	-0.75	-1.25	0.75	-2.75	1.25	-2.25
			30.36	-1	-1	1.25	-1.25	-2.75	1	-3.25	-2	-2.25				30.36	-3	2.5	0.25	-0.25	-0.25	-1.25	-2	0.75	-1.5
			30.4	-3.75	6.25	-0.25	-1.5	-1.75	-3.5	-2	-1.5	0				30.4	-3	6.5	0.5	1	1	-4.5	-2.5	-1	-2.75
			30.44	-1.75	4.5	0.75	-4.25	1.25	-2.5	-2.5	-0.5	1				30.44	-2	1.5	0.5	1.25	1.5	-4	-3.5	-2	-1.25
			30.48	-1	1	2.5	-1.75	1	-2	-3	0.25	-1.5				30.48	-0.5	-3	1.75	0.5	2.5	-3	-0.5	0.5	-1.5
			30.52	-1.75	1	1.75	-0.25	-2.25	-3.5	-1.25	-2.25	-2.5				30.52	-0.5	-1	2.5	-1	-0.75	-3.25	0	-0.75	-2.25
			30.56	0.5	-0.5	-1.25	-0.75	-2.25	-4	-2	-4	1				30.56	-1	0.5	0.25	-3.25	-3.75	-2.5	-0.5	-2.75	-0.25
			30.6	3	-0.5	-2	-1	-1.75	-2.75	-2	-3	1.25				30.6	-2	-0.75	-2	-5	-2.5	-1.5	0.25	-4.5	-0.75
			30.64	4.5	2.5	-2.75	-0.25	-2	-2.5	-2	-0.25	-1.25				30.64	-0.75	0.75	-4	-3.25	0.5	-3	0.5	-3.25	-0.75
			30.68	3	0.75	-2.25	1	-1.75	-2.75	-1.75	-0.75	-1.25				30.68	1	0	-2.5	0.5	-0.5	-3.75	-2	0.25	-1
			30.72	3.25	-1.75	-2	0	-1	-1.5	-1.25	-2	-1.5				30.72	2	0.75	-0.25	1.75	-3	-2.5	-0.5	0.5	0.25
			30.76	4	-3.25	-0.5	-2.25	-3.25	-1	0	-1.25	-1.25				30.76	3.75	3	1.5	1.75	-4.5	0.75	0.25	-1.25	1.75
			30.8	1.75	-1.5	-0.75	-2.5	-4	-2.25	0.75	1.25	-1				30.8	3.75	2.75	2.25	0.75	-3.25	1	0	0.75	2.75
			30.84	-1.25	-0.25	-1.75	0.25	-0.5	0	-2.25	2	-2.25				30.84	2	1.25	0.75	0.75	0.75	0.75	0.5	3.5	0
			30.88	-3.75	0.75	-1	1.75	0.25	2.5	-1.5	-0.75	-3				30.88	0	0.75	0.5	-0.25	0.75	0	-1.25	1.75	-2.5
			30.92	-6	3	-1.5	1.5	-1	2.5	0	-4.5	-0.5				30.92	-1.5	1	0.75	-2.75	-2	-1	-2.5	-2	-2.25
			30.96	-7	2.5	1	-1	-3.5	1.5	0	-2.25	-1.75				30.96	-2.25	1.5	0.5	-3.25	-2	0.25	-0.5	-2.5	-1.5
			31	-7.5	0.75	0.75	-0.25	-2.5	0	-0.25	0	-2.75				31	-1.75	0.5	0	-0.25	-2	0.25	0.5	-1.75	-1.5
			31.04	-3	0	-1.25	2.25	0.5	-2	-1.5	1	-1				31.04	-0.25	0.75	-0.75	1.75	-2	-2.25	-0.25	0.25	-1.25
			31.08	0	-3.75	-2.5	0.75	0.5	0	0	2.25	1.5				31.08	0.5	-3.25	-1.5	1.5	0.5	-1.75	2	1.75	0.75
			31.12	1	-3.25	-1	-2.25	-0.75	-1.25	-1.5	1.5	0.25				31.12	1	-6	-1.25	0.75	-0.25	-1	-0.5	-0.25	2.25
			31.16	2.5	-2.25	-0.25	-2	1	-3.25	-1.25	2	1				31.16	1.25	-4.5	-1.5	0.75	2	0.25	-4.25	-1	1.5
			31.2	2.25	-4.75	0.5	-4.25	0.25	-2.25	-1.75	1.25	0.75				31.2	1.5	-6	1.25	-1.75	1.5	1.25	-3.75	1.75	1.25
			31.24	2.25	-5.5	0	-3	-2.5	-2.25	-2	-1.75	-1				31.24	2.75	-6.5	1.5	-2.75	0	-0.75	0.75	3.75	0
			31.28	-0.75	-1	1.5	0	-0.25	-1.25	-3.75	-2.5	-2.25				31.28	2	-1.75	2.25	-2.25	0.75	0	2.25	1	-0.5
			31.32	-1.25	1.75	0.5	1.5	-1.5	-2	-1.75	-5.25	-3.5				31.32	0.75	0	-0.25	-0.75	-0.75	0.75	3.25	-3.5	0.75
			31.36	-1.5	0.25	-1.25	-1.25	-2.25	-3.5	1.5	-3.5	-0.75				31.36	0.5	2.25	-3.5	-1	-2.75	-1	1.5	-2.5	1.5
			31.4	-3.25	2.25	-1	-4.75	0	1.5	1.25	0.75	0.25				31.4	-3.25	4	-1.5	-1.5	-0.5	0	1	0	1.25
			31.44	-1.75	2.25	-1	-3.5	1.75	1.75	-0.25	-0.5	0.5				31.44	-2	2.5	0.5	-0.75	2	-1.25	0.75	-0.75	0.5
			31.48	-0.25	2.25	0.75	-2.5	1.5	0.25	2.25	-1.75	-0.5				31.48	1.5	0.5	2	-0.5	1.25	-2.75	2.5	-1.25	0.25
			31.52	0	0.5	1	0.75	-0.75	-0.25	1.75	-1	-0.25				31.52	2.5	-0.75	1	0.5	0.75	-0.75	0.5	-0.75	2.5
			31.56	-0.5	0.5	-0.5	1.5	-2	1	-1	-3.25	-1.25				31.56	2.25	0	-2.5	-1	0	1	-2.5	-0.75	1
			31.6	0.25	2.5	-2	0	-1.5	2.75	-1	-3.25	-1.75				31.6	2.75	2.75	-2.5	-1	-1.25	1.25	-2	-2.5	-1.25
			31.64	1	0.5	-1.75	-2.5	1	5.25	-0.25	-0.25	-1.25				31.64	0.5	2.75	-0.75	0.75	0	2	0.5	-1.75	-2
			31.68	1	-0.25	-0.75	-1.75	2	4	2	2.25	-0.5				31.68	-2	1.25	0.25	1.75	-1	0.25	4.5	-1.25	-2.5
			31.72	-1.5	-1.5	-1	1.25	0	3	0.75	1.75	0.75				31.72	-3.5	-2.5	-0.25	0.75	-1	2	2.75	1.75	-1.75
			31.76	-2.25	-1	-2.5	4.25	1	2.75	1	-0.5	1.25				31.76	-3.25	-1	-2	1.5	3.5	3	0.5	0	1.5
			31.8	-0.5	-0.75	-0.5	2.75	2.25	1.25	1.75	-3	-1.75				31.8	-0.25	-0.5	-2.75	2.5	4.75	0.75	-1	1	0.25
			31.84	1.25	-0.5	1.5	0.25	3.5	0.25	-1	-1.5	-1.75				31.84	1.75	-0.25	-3.25	0.25	0.25	-0.75	0	0.75	-2.75
			31.88	2.75	-0.5	1.75	0.25	1.75	-0.75	-1	0.75	-0.75				31.88	1.25	0.25	-1.5	-1.75	-2.5	-2.25	2.75	-0.75	-2.5
			31.92	1.5	-1.25	-0.25	1.25	2	-1.75	-1	0.25	1				31.92	1.75	-0.25	-0.5	-3	-0.5	0.5	2	-1.25	-1.25
			31.96	-0.75	-1.5	-2.25	1.75	1.5	-1.75	0.25	-1	1.25				31.96	1	-2	-0.25	-0.75	1	1.5	0	-1	0
			32	0.25	0.25	-3.25	1.75	0.25	-0.5	-2	-3.75	0.25				32	1.25	-0.75	-1.25	1	0.25	0	-3.25	-0.75	1.25
			32.04	-0.75	-0.5	-1.75	2.25	-1	2.25	-2.75	-5	-1.75				32.04	1	1.75	-1.25	1.25	-0.75	-2	-3.75	-2	0.75
			32.08	-3.75	-0.5	1.5	2.5	-1.75	2.25	-3	-5.25	-1				32.08	-1.75	3.75	1.25	2.5	-0.25	-1	-2.5	-2.25	2.5
			32.12	-5.25	-0.5	1.75	-0.5	-1	1.5	-4.25	-2	0.5				32.12	-3	3.25	2.25	0.5	0.25	1.75	-4.25	-1	2.25
			32.16	-3	-0.5	-0.75	-1.5	-1.5	0.75	-5.25	-1	-1.25				32.16	-1.5	2.5	1	0.25	-0.75	1.75	-6.5	0	-0.25
			32.2	0.5	1.25	-1.25	0	-2	-1.5	-4.25	1.25	-1.25				32.2	0.75	2.75	0.75	0.25	-0.5	0	-4.75	3	-2.75
			32.24	2.75	1	-1.25	-1.5	-0.75	-3.25	-2.75	3.5	-2.5				32.24	2.5	0.75	1	-2.75	0.25	-1.5	-2.75	1.25	-3
			32.28	1.75	-0.5	-3.25	-1.25	1.75	-3.5	-3.25	3.5	-3.75				32.28	1	0.75	0.5	-2	1	-3	0.75	-2.25	-2.75
			32.32	-0.5	-1.5	1	-1.5	0.25	-3.5	-1.5	-1	-4.5				32.32	0.25	2	3	-1	-0.5	-2	1	-3.5	-3
			32.36	-0.25	-0.25	5	-2.5	-3	-1.25	-0.5	-3	-3.5				32.36	0.25	1.75	2.5	1.75	-1.25	1	2	-1.25	-1
			32.4	1.75	0.25	2.5	-1	-3.25	-0.5	-1.25	-2.75	-1				32.4	1.5	-0.5	2	3.75	0.25	0.25	3	-1.75	0.25
			32.44	-0.5	-0.75	-0.25	-2.5	-2.5	-2.75	-1	-3.75	0.5				32.44	1.5	-2.25	1	1.5	0.75	-3.5	2.75	-1.25	0.25
			32.48	0.5	-2	-0.25	-3.5	-1.5	-2.75	0.5	-4.5	0.25				32.48	2	-2	-0.25	0.5	-0.25	-3.25	2	0	-1.25
			32.52	1.5	1	1.5	1	-0.75	-1.75	0.25	-1.75	-1				32.52	0.5	-0.5	1.5	3	-0.5	-1.75	1.75	1.5	-0.5
			32.56	0.75	1	1.25	2	0.25	-0.25	0.5	1.25	-1.5				32.56	-0.75	0	2.25	2.5	1.25	1.5	3.5	1	-0.25
			32.6	-4	-1.25	-1	-0.25	-0.5	1.25	1.75	3.25	1.25				32.6	-2.25	-0.75	1	0.5	1.25	3.25	1	1.5	2.25
			32.64	-3.25	-3.25	-1.75	-1.5	1	2.5	2.75	3.75	1.25				32.64	-2.5	-1.75	1	-1.25	1	1.5	-0.25	2.25	2.5
			32.68	-2.5	-5.75	-1	0	1.75	3.75	1.75	1.5	0.5				32.68	-2.25	-0.5	0	-1.25	1.25	0.75	0.75	0.5	0.5
			32.72	-3	-1	-0.25	-0.75	1.25	1.75	0.5	1	-2.5				32.72	0	2.5	0.25	-0.75	2.5	1.75	0.75	2.5	-2
			32.76	-1.5	2.5	-0.75	-1.5	1	-1	1.25	0	-3.5				32.76	0	1.75	0.75	-0.75	3.25	2	0	2.75	-1.5
			32.8	-1.25	2	-1.5	-2.25	-0.5	-1.75	1	-1	-0.5				32.8	-0.75	0.5	-0.25	-0.75	2	3	-3.5	3	2.25
			32.84	-1	-0.75	-3.5	-0.75	-1	-1.25	1.25	-1	-1.25				32.84	0.25	-2	-1.75	0.5	-0.25	2	-2.5	1.25	0.75
			32.88	1	-2	-2.75	1.5	-1.25	-2.25	0.5	-0.25	-0.75				32.88	2	-2	-1.75	0.25	-1.25	-1	0.5	-0.75	-2.25
			32.92	2.25	-1.75	-2.5	2.25	-4	-2	-1.5	-0.75	1.75				32.92	5	0.75	-1.25	0	-2.5	-2.25	0.25	-1	-1.25
			32.96	2.25	0.25	0.25	2	-3.25	0.5	-3.25	-1.25	0.25				32.96	3.25	2	-0.5	-1.75	-2	-1.25	-1	0.5	0.5
			33	-1.25	-0.25	0.75	1.75	-2	3	-1.5	-0.5	-2.75				33	0.75	0.75	-3.75	0.25	-2.25	0.5	1	1	1.25
			33.04	-1.25	-1	0.75	0.5	-1	6.25	-0.75	2	2				33.04	1.5	-1.75	-3	2.25	-2.5	2.75	0.5	3.5	1.5
			33.08	1	-0.75	1.75	-0.75	-0.75	4.5	-2.75	0	4.25				33.08	1.25	-2.25	1.25	2.25	-1	2.25	-1.75	1.5	2.5
			33.12	1.25	-1	-0.75	-1.75	-2.5	0.25	-3.25	-2.5	0.5				33.12	-0.25	-3	1.5	1	0	-0.25	-1	-3.5	1.25
			33.16	0.25	-1.5	-1.25	-1.25	-3.25	-2.75	-0.25	-0.25	-3.5				33.16	0.75	0.5	1.5	0.75	0.75	-0.5	1.5	0	1
			33.2	0.75	-2.25	1	0.5	-1.75	-6.75	-1.25	-1.5	-4				33.2	3	2.75	3.25	1.25	3	-0.75	1.5	2.25	-1.25
			33.24	0.75	-3.75	1	1.5	-1.25	-7	-4.25	-2.75	-3.75				33.24	5	3.25	2.5	2.5	1.5	-2.25	1.25	-0.25	-4
			33.28	-1.25	-3.75	-0.75	-0.25	-3.5	-4	-3	-4.75	-2.5				33.28	4.75	1.75	1.25	1.5	-3.25	-3.5	0.75	-3	-1.75
			33.32	-4	-2.25	-0.75	-1.25	-2.25	-0.25	-2.75	-5.25	-4				33.32	0.25	-0.25	0.5	2.5	-1	0	-1	-3	1.75
			33.36	-3.75	1.25	1.5	-1.25	-0.75	-1	-3.5	-6.25	-2.25				33.36	-1.5	0.25	1.75	3.75	4.25	-0.75	-2.25	-4.25	4.5
			33.4	-1.25	4.25	1	-1.25	0.75	-1	-4.75	-4.25	-2.25				33.4	0	2	2.25	1.5	4.5	-1	-3.25	-3.25	3.25
			33.44	-0.25	2	0.5	-2	0	0.75	-2.25	-0.5	-2				33.44	2.25	4	4	0	0.25	0.5	0	2.25	0.25
			33.48	-0.75	1	-2	-2.25	4	1	-2.75	2.5	-0.5				33.48	3.25	3.75	1.25	-0.25	2.5	2.25	-0.75	3.75	0.75
			33.52	-2	-0.5	-4.25	-1.5	3	-2.25	-1.75	0.5	-0.25				33.52	1	-1.25	-1.25	-2	3.5	0.75	-1	2.25	1
			33.56	-3.25	-1.5	-3	-1.25	-1.75	-4.5	-3	-3.75	-1.75				33.56	-1.5	-3	0.5	-4	0.5	-3.25	-0.25	-0.75	0
			33.6	-1.25	-2.5	3.25	-2.5	-2.75	-3.5	-2.75	-4	-3.75				33.6	-1.75	0.25	1.5	-3	1	-2.25	1.5	-0.5	-0.25
			33.64	2	-3.75	3	-2	0.75	1.25	0.75	-1.75	-2.75				33.64	1	0	2	0.5	3.25	3.5	3.25	0.5	0.5
			33.68	1.75	-4	-1	-0.25	-1.5	4.25	3	-0.25	1				33.68	3	-1.25	3.5	3.25	2	3.75	5.25	0.75	2.5
			33.72	-2.25	-4	-3	0.5	-5.75	-0.75	2.5	-2.75	3				33.72	1.25	-1.25	2.5	5.25	0.25	0	5.25	1.75	3.25
			33.76	-6	-3.75	-4.25	-0.25	-2.25	-3.75	0.25	-2.25	1.5				33.76	-1	-1	0.5	5.25	1	-1.5	2.75	3.75	1.75
			33.8	-6	-3	-3	-1	-0.75	-3	-2.5	0.25	-0.75				33.8	-0.5	2.25	-0.5	2.25	-0.5	0.5	0	6	0.5
			33.84	-2.25	-0.25	-0.75	0	-0.75	-0.5	-5.25	2.25	-1.25				33.84	1.75	5.75	0.5	3.5	1.5	1.75	-1.25	2.75	-1
			33.88	1	-1.25	-0.25	-0.5	-3.75	-1	-6.25	3.25	-4				33.88	3.25	3.75	0.75	1.5	1.75	0.25	-1.5	3.5	-2.5
			33.92	1.5	-0.75	1	-1.75	-3	-0.75	-2.25	4.75	-4				33.92	3.25	1.75	0.25	-2.5	0.25	-1.75	-1	4.5	-1.5
			33.96	-0.5	-0.25	-1.75	-1.75	-0.5	-2	0	2	-2.75				33.96	4	3.25	-1	-3	0.5	-2	2	2.25	1.75
			34	-3.25	1.25	-1	0.25	-1.5	-2.25	-0.75	-1.75	0.5				34	1.75	3.25	1.25	0.25	2.75	1	3.75	-0.5	3.5
			34.04	-2.5	1.75	-0.75	0.75	0.5	-1.75	-1	-2	3				34.04	-2.75	2.5	3	2.75	4.5	3.5	5.25	-2.25	3.5
			34.08	-1.75	1	-1	1.25	0	0.5	-1.5	-4.5	1.25				34.08	-2.5	2.5	4	0.25	1.75	5	4	-3.25	1.75
			34.12	-0.75	-1.75	-2.25	0.25	-1.75	0.25	-4.25	-4	-0.5				34.12	0	1.5	2	-1.75	-0.5	2.25	-2.5	-1.75	-0.25
			34.16	0	-3	-0.75	-1.25	-3.75	-3	-3.25	-3.75	-2.75				34.16	-1.25	-1	0	0.5	-2	-0.5	-2.75	0.25	-1.75
			34.2	-2	-2.25	1.25	-2	-1.5	-1.75	1	-1.75	-3.25				34.2	-3.5	0.25	0	3.25	-1.5	-0.25	1.25	0.5	-0.5
			34.24	-2.25	-1.25	0.5	-1.25	2	-3	1.25	-1.25	-1.5				34.24	-2.5	1.5	2.75	3	-0.75	-0.75	4	-0.75	1.5
			34.28	-2	-0.25	0.5	0	2	-0.25	-0.5	-2.25	-2.25				34.28	-0.5	0	5	1	1.75	1	2.75	-0.75	0.5
			34.32	1.25	0.75	-2	0.25	2.25	2.75	-0.25	-1.75	-0.5				34.32	3	1	2.5	1	4	-0.5	0.5	-0.25	0.25
			34.36	3	0.75	-2.5	0.25	1.25	1.25	-0.25	-1.25	3.5				34.36	4.5	2	-0.25	0.75	1.5	-2.25	-1.5	-0.25	2.5
			34.4	1	0	-1.25	-0.75	-1.5	-1.25	-1.75	-2.75	4.25				34.4	2.5	-1.5	-2.5	0.25	-1.25	-0.75	-4.75	-0.75	2.75
			34.44	-1.75	-1.5	-0.5	-1	-3.75	-2.5	-2.75	-1.5	1.25				34.44	-0.5	-1.75	-3	1	-4	0.75	-4.5	1.5	2.25
			34.48	-1.75	-0.25	1.25	-2.5	-2.5	-2.25	-0.75	-4	-3.25				34.48	-1.5	2.25	0.25	-0.25	-2.5	0.75	-2.25	1.5	1
			34.52	-3.25	-1.25	2	-4.75	-0.75	0.25	0.5	-3.75	-3.25				34.52	-0.5	2.25	4.75	-1	1.75	0.75	-0.25	-0.25	1
			34.56	-3.25	-1.75	0.75	-5.5	0.25	1.75	1	0.25	-1				34.56	0.25	0.5	5.5	-2.75	3.25	1.75	1	-1.25	0.5
			34.6	-1	-0.75	-1	-4.75	1	5	3.25	0.25	-2.25				34.6	0	-0.75	3	-4.25	2.75	3	3.5	0	-0.75
			34.64	-3	1.5	0.5	-3.5	0.5	4	2	0.75	-3.75				34.64	-1.75	1.5	4.75	-1.75	2.5	1.25	4.5	2.25	-0.25
			34.68	-4.75	0.75	1	-2	-1.75	0	0.5	1.25	-2.75				34.68	0.25	1.25	3	1	0.75	0.75	4.75	2	4.25
			34.72	-2.25	1.25	0.5	-0.25	-2	-2.75	-0.25	0.5	0.25				34.72	3.25	0.75	2.25	1.75	1	-0.25	1.5	0.75	4.5
			34.76	2.5	-1	0	0	-1.75	-2.75	-2.75	-0.5	-2				34.76	4.5	-0.25	0	2	2.25	-1.25	-2.25	0.5	0.25
			34.8	3.75	-3.5	-1	1.25	-0.75	-1.5	-2.5	-2.5	-3.25				34.8	3.25	-0.75	-0.75	2.75	0.75	1	0.75	0	-1.25
			34.84	3.75	-0.25	-2	0	0.25	-0.75	-2	-2.25	-1.75				34.84	3.25	2.5	-0.25	1.5	2.5	2.25	2.75	1	1.5
			34.88	0.5	2.5	-2	-0.75	0	-0.25	-0.25	-0.75	1.75				34.88	2.75	4.75	1.5	2.25	4	4	1.75	3	3
			34.92	-3.75	1	-1.75	-1.75	0.5	-0.5	0.5	1.25	0.25				34.92	1.25	3.75	3.5	0.75	2.25	1.75	-1.25	2.75	1.5
			34.96	-3.75	0	-0.25	-1.5	-3	-1.5	2	-0.25	-3				34.96	-0.5	2	2.75	-1.5	-1.75	-1.5	-0.5	2.25	-0.25
			35	-0.25	-2	1	1.25	-4.5	-1.25	-1.5	0.5	-3.5				35	-0.5	0	1.5	0.75	-1.75	0.25	1.75	2.75	0.5
			35.04	-0.5	-2.75	-2.5	3	-3	0.25	-4.5	0.5	-4.25				35.04	-0.25	0	-0.75	3.25	0.5	0.75	0.5	1	-1.25
			35.08	-2.75	-4.5	-5.5	-1.25	-1	-1.25	-2.75	2.25	-1				35.08	-0.5	-0.25	-1.75	0.75	0	0	2	2	0
			35.12	-2.75	-1.25	-4.75	-6.25	1	-3.5	-1.5	3	0.5				35.12	-1.5	1	-2.25	-3.25	-1	1.5	1.75	4.25	0
			35.16	0.75	2.5	-1	-4.75	0.5	-4.25	-2	0.5	-2				35.16	-0.75	3.75	-3	-3.5	-0.25	1.25	-0.75	3	-0.75
			35.2	0	1.5	-0.25	-1.25	0.25	-1.25	-0.75	-1	-3.5				35.2	-1	5	-1.5	-0.5	0.75	1.75	-1	1	-3.75
			35.24	-1.25	1	1	0.25	-0.75	0.5	0.5	-1.75	-3.5				35.24	-0.75	4.75	1.5	1.25	-0.25	1.5	0	-0.25	-1.25
			35.28	-1	0.75	1	-0.25	-2.75	2	2.75	-5.5	-0.25				35.28	1	2.75	0.5	1	-0.25	1.75	2	-2	3.5
			35.32	0.5	-1.75	0.5	-0.25	-2.25	2.75	1	-7.25	0.5				35.32	2.5	-0.5	1.75	0	0	2.5	2	-2.5	5.25
			35.36	-0.25	-4.75	-1.5	-2.5	-1	-0.5	-1.25	-1	1.75				35.36	4	-2.25	4.25	-0.25	1.5	1.5	2	-0.25	6.75
			35.4	-2	-2.25	0.75	-0.5	0	-3	-3.5	-0.25	0.25				35.4	1.75	0	6.5	0.5	2.25	0.75	0.5	2.5	3.75
			35.44	-1.25	-0.5	2.25	3.5	0	-2.75	-1.75	-3.25	-0.75				35.44	2.5	0.25	4	2.25	1.75	-2	-1.5	1.5	1.5
			35.48	1.5	-0.5	-2	2	-0.25	-2	2.25	-4	0.75				35.48	3.75	-0.5	-1	1.5	1.5	-0.75	-1.25	-0.25	1.25
			35.52	1.5	-0.25	-7	-0.5	1	0.25	-2	-5.75	1.75				35.52	4.25	-1.25	-2.75	-1	1.75	2.75	-1	-2.5	1.5
			35.56	0.75	-1.75	-5.5	1.75	1.25	2	-4	-3.5	-0.5				35.56	3	-0.25	-1.5	-1.75	1.5	4.25	0.75	0	-2
			35.6	-0.75	-1.75	-0.25	5.5	0.25	3	-1	0.5	-2.5				35.6	-0.75	0	0.5	3.5	1.75	4.25	1.25	2	-3.75
			35.64	-2.5	-0.25	2.5	2	-4.25	1.5	0.5	1.5	-2.5				35.64	-3	0.5	1.75	3.75	-0.5	1.5	0.5	1.25	-2.5
			35.68	-0.5	0.25	1	-2.25	-3.25	-0.25	-0.75	2	-2.75				35.68	-0.25	1.5	1.75	1	-0.75	0.5	0.5	3.5	-4.25
			35.72	0.5	1	-1.5	-2	1	-2	-0.25	2.5	-0.25				35.72	2.5	1.5	1	0.5	0	0.75	1.25	3.75	-1.25
			35.76	-0.5	-0.75	-2.75	2	4.25	-2.75	0.25	-0.25	1.25				35.76	3	0.25	-0.5	2.25	2	0	2.5	2.5	1
			35.8	-0.25	0.25	-3.25	2	1.75	-0.25	0.5	-1.25	0.25				35.8	0.5	0	-3.75	2.25	0.25	1	2	3.75	0.25
			35.84	-0.5	1.25	-1.25	1.5	-1.25	1.5	0	-2.25	-3.25				35.84	-1.25	1.25	-4	2	-1	2.25	0	2.75	1.25
			35.88	-0.25	0.75	2.75	2.25	-0.75	0.75	-2.75	-1.5	-2				35.88	0.25	2.25	2	2.25	-1	2	-1.5	0.5	2.5
			35.92	-1	-2.75	3.25	5.25	1.75	0.75	-3	-0.25	-0.25				35.92	1.25	1	1.75	3	2.75	1	-1.75	0.75	1.25
			35.96	-0.75	-4	-0.5	5.25	0.5	-1.25	-3.25	-0.25	0.25				35.96	1	-0.25	-4.75	4.5	4	1.25	-2.75	-0.5	0.5
			36	1.75	-3	-2.75	-0.75	-3	-1.5	-3	-1	0.5				36	0	-3	-5.25	0.5	-0.75	3	1.75	-1.75	0.75
			36.04	2	0.5	-2.25	-2.75	-2.75	-3	-2.75	-3	1				36.04	-1.5	-1.75	-1.25	-1	-2.75	1	3	-2	1
			36.08	1	4.25	2.75	0	-3.25	-3.25	-2	-3.5	-0.25				36.08	-0.75	0.5	1	1.75	-4.25	0.25	0.25	0	1.25
			36.12	0	2.75	2	2	0	-1.5	0.5	-0.5	-2.75				36.12	1	0	-0.25	3	-0.75	-0.25	-1.25	2.25	1.75
			36.16	-1.25	-0.75	0	2.25	4.25	0.5	2.25	0.75	-3.25				36.16	-0.25	2.75	1	2	1	1.75	-0.5	4	0.25
			36.2	-2.25	-1.5	-0.5	1.5	3.5	2.5	2	1.5	-1				36.2	-1	2	3.25	1	0.5	3	0.25	4.25	-0.75
			36.24	-2.25	-1.5	-0.25	-0.25	-1	1.25	0.5	1.25	-0.25				36.24	0.5	0.5	2.75	0	0.5	1	-0.75	1	-1
			36.28	-3	-0.25	-0.75	0	-1.25	0	-2	-0.5	-1				36.28	-0.25	-0.75	-0.75	0.5	2.25	0.25	-0.25	-1.5	-0.5
			36.32	-2.25	-2.25	-1.5	-1	0.5	-1	-1.5	-0.75	-1.75				36.32	-0.75	-1.5	-0.5	2.5	4.5	0.75	-1	1.25	-0.75
			36.36	-0.75	-1	-1.25	-1	-0.5	-1.75	0	-1.75	-0.75				36.36	-0.75	2.25	1	1.75	3.75	-0.75	-1.5	4.25	0.75
			36.4	1	-0.5	-2	0.75	-2	-0.5	-0.5	-4	-0.5				36.4	2	3.75	0.75	-0.75	1.25	-2	-1.25	1.25	0
			36.44	2.75	2.5	-3.25	-0.75	0.25	0	-1.5	-0.5	0				36.44	2	2	0.5	-2.25	1.5	-1	-1.25	-1.5	-0.5
			36.48	2	1.75	-1.5	-1.75	1.25	0.5	-0.75	1	-0.5				36.48	-0.5	1.75	0.25	-2.5	2	2.25	2.25	1	1.25
			36.52	-0.25	-1.5	1.75	-1.5	1	-0.75	1.5	0.5	-3.75				36.52	-2	1.5	0	-3.25	-0.25	0.25	3.25	3.75	1.75
			36.56	-1.5	-3	2.5	1.75	3	-0.75	1.25	1.75	-2.5				36.56	-2.5	-0.25	-0.75	0	-1	-1.5	3.75	5.5	0
			36.6	-1	-0.75	0.5	0.5	1.5	-0.25	2.25	-1	1				36.6	-2.5	-1.75	-1.75	0.25	-2.5	-2.25	4.5	-0.25	0.75
			36.64	1	2.75	-1.75	-2	-0.5	-1.75	1	-0.5	1				36.64	2.25	0.75	-1	0.25	-4	-1	2.5	-5.25	0.5
			36.68	0	0.5	-1.5	-2.25	-1	-3.75	-0.25	2.25	4.25				36.68	4.25	0.75	1.25	1	-2.25	-1.25	2.25	-2.75	1.5
			36.72	-0.5	-1.25	1.25	-1	0.75	-3	-1.75	3.25	6				36.72	3.75	-1.75	2	-1.25	1	-0.5	0.75	1	3.75
			36.76	-0.25	-0.75	3.5	-0.75	2.5	-1.5	0.5	0.75	4.5				36.76	0.25	-2.5	2.75	-2.75	5	-1	0.25	0.5	3
			36.8	0.75	0	0.5	3.25	0.25	2.5	2.5	-1.25	1.75				36.8	-3	1.25	0.75	1.5	4.25	1	1.75	2.5	0.75
			36.84	-0.5	1.25	-0.25	4	0.75	2	2.5	-0.25	-0.5				36.84	-0.5	3.75	-1.25	3	1.5	1.75	2.25	2.5	0.75
			36.88	0.5	0.25	1.5	1	2.75	1	0.75	0.75	-0.25				36.88	4.5	3	-1.5	0.75	-0.5	1.5	0.5	1	1.25
			36.92	2.25	0.25	1.5	0	2.75	-0.75	-1	1.5	1				36.92	3.5	0.25	-1.25	3.5	-0.75	-1.25	-2.75	1.25	-0.25
			36.96	2	-2.25	0.25	2.75	3	-0.25	0.5	2.5	3				36.96	-0.5	-2	0	7	1	-1.75	-2.75	2.75	-0.5
			37	2	-0.75	-0.75	1.5	3	-1.25	2.25	1.75	2				37	-1.25	-1.5	0.25	6	0.75	0	0.75	2.5	0.25
			37.04	0.5	3.5	-0.75	-1.25	1.75	-0.5	1.75	3	0.5				37.04	0.75	0.75	0	1	2.25	1	4	3.5	-1.75
			37.08	0.75	6.25	0.5	0.5	1.25	2.25	0	2.25	0.25				37.08	4.75	3.75	0	-1.25	2	0.75	5.5	1.75	-2
			37.12	3.75	7.75	0.25	0.25	1	3	1.25	0.75	0.75				37.12	5.75	4.25	2.25	-1.25	0	0.5	3.75	0	0.25
			37.16	4.5	5	0.25	-1.5	1.5	1.75	0.75	0.75	-0.25				37.16	3	2	2.25	-3.25	2.25	0.75	1	0.25	-0.75
			37.2	3.5	0.5	-1.75	0	-0.25	1	0	0.5	-1.5				37.2	1.25	-0.5	1.5	-1.25	2.25	2.5	-1.5	-0.25	-1.25
			37.24	1.75	-2.25	-2	2.25	1.25	1.75	0.25	-0.25	-1				37.24	0.5	-1	1	3	1.75	2.75	-2.75	-0.5	1.75
			37.28	2.25	-3.75	0.75	3.25	4.5	4	1.5	1.75	0				37.28	-1.5	-1.25	2	2.25	2.5	3	-2.25	0.5	1.25
			37.32	3.25	-3.5	3.5	3.5	5	4.5	4	3.25	-1.75				37.32	-1.75	-3	1.5	2.25	2.75	1.25	1.5	0.75	-0.25
			37.36	1.5	0.5	4.75	3.75	2.5	1.75	1.25	3.5	-2				37.36	-1.25	-0.75	1.75	3.5	2.5	0	2.25	-0.75	-0.5
			37.4	-1	2.75	3	4.25	-1	0.75	-2	0.75	2.25				37.4	-0.25	2	0.75	3.5	1.5	0.5	0.25	-1.25	0.75
			37.44	-2.75	2.25	0.25	1.75	0.5	2.25	-2.75	0.75	3.5				37.44	0.25	6.25	0.75	0.25	3	1	-4.5	-1	0
			37.48	-0.5	1.5	-0.25	0.5	1.75	3.25	-1.75	-0.5	0.5				37.48	1.25	6.25	0	-0.75	3	1.5	-4.25	-1.75	-1.75
			37.52	3.5	1.5	2	1.5	2.75	1.75	-1.25	-1.5	0				37.52	5	2.75	0.75	0.5	1.25	-0.25	-0.25	-0.5	0.25
			37.56	1.5	2.5	0.75	2.75	0.25	0	-1.5	-3.25	0				37.56	5.25	0.5	2	2	-0.5	-2.75	2.25	-2.25	2.75
			37.6	-2.5	2	0.25	2.5	0.75	-0.75	-1.5	0.25	0.5				37.6	2	0.5	2.25	1.25	1.5	-1.75	1.5	-1.75	4
			37.64	-2	1	2.5	1.5	1.5	0.25	-1	2.75	1.75				37.64	-1	0.5	3.5	-1	2	1.5	1.25	0.25	4.25
			37.68	-0.5	-0.25	1.25	-0.5	-2.75	-0.5	-2	0.75	1.25				37.68	-1.25	-0.25	3	-4.5	1	3.25	2	1.25	2
			37.72	0.75	-1.5	-1	-0.75	-4.5	-1.5	-3	0.75	0.75				37.72	0.25	0.75	0	-3.25	0.25	2	0.75	3	1.25
			37.76	1.25	1.25	0.5	0	-2.5	-1.25	-1	1.5	0.25				37.76	0	3.25	-0.5	3	-1	0.5	1.75	4.25	2.25
			37.8	0.5	3.25	-0.25	1.75	-0.75	1.25	3.25	0.5	1				37.8	-0.25	1	-0.75	6.75	-2	0.75	4.25	3.5	2.5
			37.84	1.75	0.5	-0.25	2.75	2	4.25	4	-0.25	0				37.84	-1.25	-2	-0.25	5.25	-0.75	2	4.5	-0.25	-1
			37.88	2	-0.25	-1.75	2.25	5	4.25	3.25	-0.5	-0.25				37.88	0	0.5	-1	1.75	2.25	4	5	-1.75	-1.5
			37.92	2.5	0.5	-1	0	3	-1	0.75	-0.75	2.25				37.92	2.5	3.25	-0.5	-1.75	2.75	3.25	2.75	-0.75	-0.25
			37.96	3	1.25	-0.25	-2	0	-4.25	3	-1.25	2.5				37.96	4	4.5	0	-0.5	3.25	2.25	3.75	1	0.75
			38	0.5	3.5	1.75	-2.5	2	-1.25	2.75	-1.5	1				38	2.5	7	0	-0.75	3.75	2.25	0	-0.5	-0.75
			38.04	-0.5	4.25	3	-2	1	0.75	3.25	0.25	1				38.04	0	5	1.25	-1.25	-2.25	1.5	-1.5	-0.75	0
			38.08	-1	3	4.75	-0.75	-1.25	0	4.25	2.75	0.5				38.08	-0.25	0	3.5	-0.5	-4	1.25	2.25	0.25	1
			38.12	-0.75	1	3.25	-0.75	-1	3.75	1.75	2.75	-1				38.12	0.5	-2.5	4.75	0.5	-0.25	1.5	1.25	1.75	-1
			38.16	0	0.75	2.5	1.75	1	5.25	0.75	0.75	-3.5				38.16	1	-0.5	4.25	2.5	2.5	-0.25	-0.25	1.25	-3
			38.2	1	2.25	1	2.75	-0.25	2.75	3.25	-0.5	-1.75				38.2	0.5	2	-0.5	1.5	1.5	-0.75	2.5	3	1.25
			38.24	-0.5	2	0.75	0.75	0.25	0.5	1.5	1.5	-0.25				38.24	-0.5	3.25	-4.5	0.5	-1	2	1.25	4	3.25
			38.28	1	0	0.25	1.5	0.25	0.25	0.5	3.25	-1				38.28	-0.5	0.75	-2.25	0.75	-3.25	4.25	-0.75	2.75	0.25
			38.32	1.25	3	1	0.25	-0.25	0.5	0.75	3	-2				38.32	0	1.75	2.25	1	-2.5	3.25	-1	2.5	-1
			38.36	-2.5	3.75	0.25	-0.75	2.25	1.75	1.25	-1	-0.25				38.36	0.25	2.25	1.25	0.5	4.25	0.25	-1.5	2.25	2.75
			38.4	-2.5	1.5	-2	-0.25	2.25	-1.25	2	-1.75	3.5				38.4	2.25	-1.75	0.5	0.25	6	-2.75	-1.25	2.75	4
			38.44	1	0.5	-1.75	1	0	-2.25	3.25	-1.5	2.5				38.44	2.25	-3.5	0.75	-1.5	3.25	-1.5	0.5	0.75	-0.25
			38.48	2.5	1	0.25	1.75	1.5	-1.5	2	-1.75	0.25				38.48	-0.25	-2.25	1	-1.75	2	-2	0.5	-0.75	-0.5
			38.52	2.75	0.5	2.25	3.25	2.25	-0.5	-0.75	-0.25	-1				38.52	-1.25	-0.25	2.25	-1	0.5	-1.75	0.25	-1	1.25
			38.56	-0.25	2.5	3.25	3.75	0.5	2.25	-0.5	-0.75	-1.75				38.56	-2.5	6.25	4.5	1.5	-1.25	0	2	-1.75	0.75
			38.6	-0.25	2.75	2.25	3.75	0	3	-1	-1.5	-1.25				38.6	-1	7	2.75	2.75	0.25	2.75	3	-1	0.25
			38.64	2.75	2.75	-0.75	3.75	-0.25	0.75	-2.5	-1.5	1.75				38.64	2.25	4.25	-2	0.5	0.75	2	2	0.5	0.25
			38.68	1.75	1.25	-1.5	3.75	0.75	0.75	-0.5	-2.25	2.5				38.68	4.5	1.75	-2	-0.25	0.5	2	-0.5	1.5	1.75
			38.72	2.75	-1.5	-1	2	2.25	1.5	-2.5	-1.5	0.25				38.72	5	-2.5	-0.25	2	1.75	2.25	-4.5	0.75	1.5
			38.76	3.5	-4	0.75	-1	0.25	1.5	-1.5	0.25	-1				38.76	2.25	-2.75	2	3	2.25	2.75	-2.75	-0.25	-2.25
			38.8	3.75	-3.5	0.75	-2.5	1.5	0.75	2	1.25	-0.75				38.8	1.5	-3	3.25	2.5	0.75	0.75	4.25	1.5	-5
			38.84	1.25	-0.25	-0.25	-3.5	1.5	2.75	3.25	2	-1.75				38.84	3.25	-1.75	1.5	1.75	1.5	0.75	5	2	-3
			38.88	1	-1.75	0.25	-2.75	0.25	2.5	2	1.5	-1.25				38.88	3.5	-2	0	2	1.5	1.25	3	1.5	-0.25
			38.92	1.5	-0.5	-2.25	1.75	-0.25	-0.25	-0.5	0.5	-2.25				38.92	2.25	-3	-1	1	0.5	-1.5	-1.5	2.25	-0.5
			38.96	1	-0.25	0.5	2.75	1	-2.5	-1	3.5	0.25				38.96	2.5	-2.5	0	1	0	-3.75	-2.5	2.25	2.5
			39	-0.5	0	2	2	4	-1.75	-1	4.25	1.75				39	2	-1.75	1.25	0.25	1	-1.25	-2.5	0.25	2.75
			39.04	-1	0.75	1	2.25	2.25	0	0.75	2	2.5				39.04	0.5	1.75	-1	1.25	1.5	2	-0.75	-0.5	3.75
			39.08	-0.5	1	-0.25	1.75	-0.25	1.25	1.25	1.25	2.5				39.08	-2	4.5	-3.75	2.75	1	3.75	0.5	-0.25	3.25
			39.12	2	1.75	2.5	4	-2	2.5	1.75	-0.5	2				39.12	-2.25	2.25	-2	3	-2	2.75	0.75	-1.5	-1.25
			39.16	4.5	3.25	6.5	6.5	-5	3.75	4	-1.75	0.5				39.16	-0.5	2.25	2	3.75	-4.25	2.5	2.5	-3.75	-2.5
			39.2	4.25	5.25	5.25	3	-5.25	0.75	5	-2.25	0.25				39.2	0.75	1.75	3.25	2.5	-1	1.75	3.5	-2.75	-0.5
			39.24	1.25	5.25	3.25	-1	-0.75	-2.5	4	-1.25	-0.5				39.24	3	0.75	1.5	0.5	1.75	0.25	2.75	-0.5	1.75
			39.28	0	2	0	-2.75	1.5	-1.5	4.75	0.25	0.75				39.28	3.25	-0.25	-0.75	-0.5	1	1	5.25	1	2.25
			39.32	0.5	-1.25	-1.5	-1	1.75	1	5	1.25	2.5				39.32	0.75	-0.75	-1.5	-1.75	2.75	2.5	4.25	2.25	1.25
			39.36	0.75	-1.5	-2.75	-0.5	1.25	2.25	1.75	3.25	3.75				39.36	-0.25	1	-1	-2.25	4	1.75	0.5	2.25	1
			39.4	-1.5	-2.5	-0.5	2.25	0.75	2.5	-0.25	4.25	3.5				39.4	-2.75	0.25	-0.5	-1.5	1.75	1.75	0.5	0.5	1.5
			39.44	-3.5	-2.25	1.5	2.25	-0.25	2	1	2	3.5				39.44	-2.5	0.75	-1	-1.25	0.5	2.5	2.75	-1.75	-0.25
			39.48	-5.25	-1.75	2.25	-0.75	-0.5	1.75	2.25	-0.5	1.5				39.48	-1.5	-1.5	0.5	-1	-0.25	0	4.25	-0.25	-1.5
			39.52	-2.75	-2.25	1	-3.25	0	2.75	-1	-1.25	1				39.52	-0.25	-3.75	2.25	0.25	-0.75	1	-0.75	1	-1
			39.56	-0.25	-0.75	1.25	-2.5	1.75	1	-2.75	-0.5	0				39.56	-0.25	-2.75	1.25	-0.75	0.25	1.25	-1.5	1	-1.75
			39.6	0	1.25	0.5	2.25	5.25	0.75	-1	0.5	0.25				39.6	-1	0	-0.5	0.75	3.75	2	0	1.25	-0.5
			39.64	-1.5	2.25	2.75	3.75	5.75	0.75	-0.75	-1.75	1.25				39.64	-1	2.5	0.25	2.75	4.5	2	-1.5	0	0.25
			39.68	-0.75	1	4	1	2.75	0.5	0.5	-3.25	-0.75				39.68	1.75	2.25	-0.5	2	2.25	1	-0.5	0.75	0
			39.72	0.25	0	2	-0.5	2	-0.5	1	-1.25	1.25				39.72	1.75	2.25	-1.5	2	1	-1.75	1.5	1	0.75
			39.76	0.25	0	-1.5	-1	2.5	-3.25	3.25	0	3.25				39.76	1.25	3.25	-0.75	1.75	-0.25	-3.5	3.25	-0.25	1.5
			39.8	1.75	0.75	-1.25	0.25	0.75	0.25	4.25	2	3.75				39.8	3.5	2.75	1	1.5	0.5	-0.5	2.75	-0.25	1
			39.84	4.5	2	-0.5	2.5	0.75	4.25	1.25	1	1				39.84	5	0.75	1.5	3.5	1.75	1.75	1.5	-1.5	0.25
			39.88	2.75	1	-1	1.5	0.5	4	-2	0.75	-0.75				39.88	3.5	-1.75	-0.25	2.75	2.75	2.5	-1.5	-1.25	-0.25
			39.92	0.5	0.75	-1.25	-2	0.25	0.75	-3.75	3.75	-3				39.92	0	-1.25	-1.75	0.5	-0.25	2	-2.25	1.5	-0.75
			39.96	-0.5	-1.25	-0.25	-1.25	-0.25	-1.5	-2.75	2.75	-4				39.96	-1.25	-1.25	-0.75	-0.75	-1.75	-0.5	-1.75	0.75	-0.75
			40	-1.5	-2.25	0.5	3	-1.5	-0.5	-2	3	-2				40	-0.5	0	1.25	-1	-3.25	-1.75	-2	0.25	-1
			40.04	1	-2.25	3.25	5.75	-1.75	3.5	0	0.5	1.25				40.04	2	1.5	3	-0.5	-3.5	1.75	0.25	0.25	0.5
			40.08	2	-1.25	4.25	3.75	-4.5	2.75	3	0.5	1.5				40.08	1	0	4	-1.25	-3.5	0.75	1.25	0.75	0.75
			40.12	1	1	2	0	-4.25	0.25	5	2.5	1.25				40.12	0.25	0.25	1	-1	-3	-1.5	0.75	2.5	1
			40.16	-0.25	1.75	-2.75	-0.5	0.75	-1	3.5	0.75	2				40.16	-0.5	-0.25	-0.5	-0.75	2.75	-2.5	0.5	1.25	0.25
			40.2	1	2.5	0	-1.75	2.25	-2	2.5	-2.25	1.75				40.2	-2	-2.25	1.5	-1	4.75	-1.75	-0.5	0.25	-0.5
			40.24	1	3	2	-0.25	1.5	-1.5	1.5	-1	0.25				40.24	-4.25	-2.25	3.25	-0.25	-0.5	-0.25	-0.75	-1	-0.5
			40.28	-0.25	3.5	2.5	1.75	-1	-1.25	1.25	-0.75	0.5				40.28	-3	0.75	3.25	0.25	-2.25	-0.25	0.5	-0.75	1
			40.32	-1.25	-1.25	0.25	-0.5	2.25	-2.5	0.25	-0.5	1.75				40.32	-0.5	-1.5	0.5	-2	0.5	-0.25	-1.25	-0.5	2.25
			40.36	-0.5	-2.25	1.25	-1.5	3.75	0.25	-1	-0.5	1				40.36	-0.25	-3.5	-1	-2.5	0.75	1.75	-3.5	0.5	1.75
			40.4	-0.75	-0.5	1.75	2.25	0	2.75	-2.5	1.5	-0.25				40.4	-0.5	-3.25	1.25	-0.25	-0.75	0.25	-2.25	0	1.25
			40.44	-0.5	0.25	3.75	1	0.75	1.5	-2.25	2.75	0				40.44	-1	-2	1	-1.5	-1.75	-0.75	-0.75	-1.25	1.25
			40.48	1.25	0.5	3.25	-1	3.5	-1.25	1.5	1.25	2				40.48	1	-0.5	-3	-1.5	-1	-3.5	0.75	-0.5	1.75
			40.52	1.25	-0.75	2.25	-0.5	1.5	-1	1.25	0.25	2.25				40.52	3	-0.75	-2.25	2.5	-0.5	-4.25	-0.75	-2	1.5
			40.56	0.25	-0.75	0.5	1.5	0.75	1.75	1.5	1	1				40.56	0.5	-1.5	0.25	3	-0.5	-0.5	-0.5	0	-1
			40.6	3	0.5	-0.25	0.5	-3.25	3	0.5	3	-2				40.6	0.75	-0.75	-2	0.25	-1.5	1.75	-0.75	1.75	-4.5
			40.64	1.75	1.75	-0.5	-1.25	-2.5	1.5	0.25	3.75	-2				40.64	-0.25	0	-2.75	-2.75	0.25	1	0.5	2	-3.25
			40.68	-0.75	0.75	-1.75	-2.25	0	-1.5	0.75	2.5	-2.25				40.68	-0.5	0.25	-2	-3.5	0	1.75	-0.75	-1.5	-1.75
			40.72	-1.5	-1.25	-1.5	-0.5	3.25	-1.75	-0.75	-0.25	-2.5				40.72	-0.5	-0.5	0.75	-2	1.25	0.5	0	-2.5	-0.75
			40.76	0	1.25	0	0.25	1	1.5	-1.5	0.5	-0.25				40.76	0	0	2.25	-2.25	-1.75	-0.5	1.75	0.25	1.75
			40.8	3.5	1.75	1.5	0.75	-0.75	2.5	0.75	3.25	3.5				40.8	1.25	1.25	-1.25	1	-2.5	-1	4.5	1.5	1.5
			40.84	2	0	2.75	-2.5	1.75	2	1.25	2.25	2.25				40.84	1	1.75	-2.25	0.25	-1.25	-0.75	2.75	1.75	-1.25
			40.88	-0.25	-0.25	3	-2	0.5	3	-0.25	1.25	-0.5				40.88	0.75	0.5	-0.5	-0.25	-2.5	1.5	1.25	0.25	-2.75
			40.92	-2.75	2.75	0.5	-0.5	-1.5	1.5	1.5	-0.25	1.25				40.92	0	1.5	-0.5	-0.75	-2.75	1.75	-0.75	-1.5	2
			40.96	-2	4	-2.5	-0.5	-2.5	1.25	2	0.75	2.75				40.96	-3.25	1.75	0	-1.25	-0.25	0.75	-2.5	1.25	6.5
			41	-0.75	0.5	-2.25	0	-0.75	-1.5	-1.75	-0.25	-0.25				41	-3	0	-0.5	0	2.5	-2	-1	0.75	2.25
			41.04	-3.5	-0.75	-1.5	1	0.5	-1.25	-1.25	-3.75	-0.75				41.04	-2.25	0.25	-1.5	-0.75	1.75	-2.75	-1.5	-0.25	-1
			41.08	-4.75	-1.25	0	3.5	1.75	-0.25	1.75	-3.25	-2.75				41.08	-2.5	-1.25	1.25	0.5	2	-3	-1.25	1.25	-3.25
			41.12	-3	-1	-2.25	2.75	2.75	-0.5	3.25	-2	-3.75				41.12	0	-2	2.75	1	2.5	-2	1.5	-1	-3.25
			41.16	0.5	0.25	-1.75	1.25	3	1.75	3.5	-0.25	-0.75				41.16	0.75	-1.75	2.5	0.75	2.25	-0.5	1.75	-1.25	-1.75
			41.2	3.75	0.25	1.5	-0.25	2.5	1	-2.25	-0.75	-0.25				41.2	2	-2.5	2.5	-1.25	-0.25	-1	-1.25	-2	0
			41.24	5.75	1.25	3	0	2.25	-0.5	-3.75	-0.5	-1				41.24	2.25	-2.25	3.75	-2.5	-2	-3.5	-0.75	-1	-0.75
			41.28	6	2	1.25	0.5	1.25	-0.25	-3.25	0	0.25				41.28	2.25	0.25	2.25	-1.25	-2.75	-2	-0.5	-2	0
			41.32	4.5	3.25	-0.25	0.75	2	1	-2	2.75	-1				41.32	2.25	0.5	0.5	-1.25	-0.75	1.25	-0.5	-4	-2.5
			41.36	1.5	1.25	1.75	-1	2	0.5	-0.75	5.75	-0.25				41.36	-0.75	-2	-2.25	-3.25	2.25	1	-0.25	-2	-2.25
			41.4	-0.25	-1.75	-0.25	-1.75	0.5	-2.75	3	2.5	0				41.4	-2	-0.75	-3.5	-3.25	2.75	0.25	2	-1.25	-1
			41.44	-2.25	-1	-1.25	-2	0.75	-3.25	3.75	-2.25	1.5				41.44	-2.75	1.75	-1	-1	2.25	-0.5	2.5	-0.75	2.75
			41.48	-1.5	1.25	1.5	-1.75	0.25	-0.25	3.5	-3.25	2.75				41.48	-3	2.5	1	2.25	-0.5	-0.75	1.75	1.25	3.5
			41.52	-0.75	1.25	1.5	2	-0.5	0	3.5	-0.75	1.5				41.52	-2.75	0	-0.25	1	-2.75	-2	-0.25	2.5	4.25
			41.56	-1	-0.75	-0.75	1.25	-0.75	0.75	3.5	1	-0.25				41.56	-4.25	-3.25	-1	-1.75	-1.25	-2.5	-1.5	1	2.75
			41.6	-1.5	-1	-2.5	-0.75	-2.25	2	0.25	2	-1.25				41.6	-4.75	-3.5	-3.25	-3	-2.5	0	-3.5	0.25	0
			41.64	0	0	-2	0.5	-2.25	2.25	-1.25	0.75	-2.25				41.64	-3.5	-2.25	-2.75	-2	-5.5	2.5	-1.25	0.25	-1.75
			41.68	1.25	1.5	-1	1	2.5	3	0	1.5	0.75				41.68	-0.5	-2	0.25	0	-3	3	1.75	2.5	0.25
			41.72	1	3	-2.75	3	5	4	1.75	-2.25	2.5				41.72	0	-4	0	0.25	-1.5	1	2.75	-0.75	1.25
			41.76	-0.25	2	-1.25	3.25	4.25	2.5	3	-3	2.5				41.76	-1	-4.25	0	0.25	0	-1.75	1	-5.5	1.75
			41.8	-0.75	2.25	0.25	3.5	2.75	2	3	1.75	2.75				41.8	-2	-2	-1.5	2.25	0	-1.5	-0.75	-3.25	-0.5
			41.84	1.75	2	2.5	1.25	-0.25	1.25	0.25	3.75	1				41.84	-1.5	-0.5	-2.75	0.5	-1.75	0	-3.25	0.5	-4.5
			41.88	2.5	1.5	5.5	0.5	-2	0	0.75	2	1.25				41.88	-0.5	0.75	-3	0	-4.75	-1.5	-2	0.25	-3
			41.92	1.5	1.75	3	0.75	-1.75	2.5	2	0	0.5				41.92	-0.5	1.5	-0.5	-0.25	-7.75	-1	-0.75	0	0.5
			41.96	3.25	1.25	1	-0.25	0.25	3.5	2	-1.5	1				41.96	2.75	-0.25	-1.25	-3.25	-6	-0.5	-0.75	-2	0.5
			42	3.25	4	1.5	0	2.75	0.5	0	-1.5	2.25				42	3.75	-1	-1	-3.25	-2.25	-3	-1.5	-2	-2.5
			42.04	2.75	4.5	2.25	-0.25	1.25	-3.25	-1.75	0.25	3				42.04	1.25	-0.25	-1.5	-2.5	-1.75	-3.75	-4	-0.5	-3.25
			42.08	2.25	2.25	4	1	1.5	-2.75	1	2	0.75				42.08	-0.5	-0.25	-0.25	-3	0.5	0.25	-2.75	1	-3.25
			42.12	4.5	-3.25	3.5	1.25	3.75	1.25	0.75	3.75	-0.75				42.12	0	-2.25	-1.25	-2.75	3	3	-1.5	2	-1.5
			42.16	3.25	-7.25	2.5	0.25	4.25	1.75	1.75	0.5	-0.75				42.16	-0.25	-5	-2	-1.25	2.25	0.5	0	-2.5	-3.25
			42.2	1.25	-4.5	0.25	0.25	0	0.75	3	-1	0.75				42.2	-1.5	-5.75	-1.5	-1.75	-0.25	-1.75	-0.25	-4	-4.25
			42.24	1.75	-1.5	-3	0.5	-3.25	-1.25	2.25	-0.75	1.5				42.24	-5	-2.5	-3	-1.5	-0.75	-2.25	-2.25	-2	-1.5
			42.28	2.5	1.5	-2	3.5	-0.75	-2	3.5	1	1.25				42.28	-3.25	-1.25	-1	-0.75	-1.25	-2.5	-0.25	-0.5	2
			42.32	0	1.75	-1.75	3.75	1.25	0.25	1.01563	2	-0.5				42.32	0	-2	-1.75	-2	-0.5	-3.25	1	-1.5	3
			42.36	-2.5	0.25	-2	0.75	-0.75	1.5	0	2.5	-1				42.36	-1	-2.5	-2.75	-2.75	0	-2	0	-1.5	2.25
			42.4	-2.25	-2.5	-3.5	-1	-1	1.75	-0.25	2	0.25				42.4	-2.5	-4.25	-5	-1.5	-1.5	-1.25	-2.25	-0.75	1.25
			42.44	0.75	0.25	-2	1.5	1.5	3.5	1	1.75	4				42.44	-1.5	-2.5	-6.25	0	-1.75	-1	-2.5	-1.5	0.5
			42.48	1	3.75	-1.25	3.25	4	1.25	2.75	1.75	4.5				42.48	0.25	-0.5	-4.25	0.75	2	-2	0.25	-1.75	0.75
			42.52	1	3	2.75	1	2.5	-0.25	3	1.5	2.25				42.52	1	2.75	0.25	0.75	2.5	-2.5	0.25	0.5	0.5
			42.56	2	3.5	4	2	-1	2.75	1.25	0.5	2.75				42.56	2	4.5	1.25	1.5	-1	0	-2	1.25	0.5
			42.6	0.75	2.75	3	4.5	-3.5	4.75	-0.5	-1.75	2.75				42.6	0	1	0	3.5	-3.25	3	-2.25	-1.5	0
			42.64	-2.5	0.75	0	6.5	0	2	-1.5	-1	0				42.64	-2.75	-1.75	-3.25	4.25	-1.25	2.5	-2.25	-1.25	-2.25
			42.68	-3.5	0.5	-1	6.75	2.5	-1.25	0.25	-1	-0.5				42.68	-2.5	-1.75	-3.5	3	-0.5	-0.5	0.5	-0.75	-1.25
			42.72	1.5	3.5	-0.75	3	2	-0.5	-1	-1.75	-0.5				42.72	-1.5	0	-2	-0.75	1	-1	0.5	-2	1.25
			42.76	2.5	1.5	-0.5	-0.5	-0.75	1.75	-2.5	0	-1.75				42.76	-1.75	1	-2	-4	-2	-2	-0.75	-1.25	-0.5
			42.8	1	-0.75	2	-0.25	2.5	-2	-0.5	2	-1				42.8	-0.75	0.75	-2	-3.25	-1.25	-3	-1	-0.25	-1.5
			42.84	0.5	0	0.75	-4.5	1	-4	-1.75	-1.75	2.5				42.84	-0.75	0.5	-4.5	-4.5	-2.25	-4.75	-4.5	-0.5	-2
			42.88	-0.25	1	1	-4.25	-1.75	-6	-3	-2.75	0.25				42.88	0.25	-1	-5.25	-3.25	-0.25	-7	-5	-0.25	-0.25
			42.92	-2.25	0	-0.5	-0.75	-2	-2.75	-1.75	-1	1				42.92	0.75	-1.75	-3	0.5	3.25	-4.75	-2.25	0.5	0
			42.96	-1.75	-1	-0.25	2.25	0.5	0.75	0	-1	3.5				42.96	-0.25	-1	-0.5	1.75	2.5	-2.5	0.25	0	-1.5
			43	0	3	-0.25	3.25	0.75	2	0	0.25	3				43	-1.25	1.25	0.5	0	-2	-1.25	1	-0.5	-1.25
			43.04	0.5	4.25	-1.5	1.5	-2.25	1.25	0	0.5	1				43.04	-1	-0.75	-0.25	-1.25	-5	0	0.5	-1	1.5
			43.08	-0.25	3	-1	-1.75	-3.5	1	1.25	0	2.75				43.08	-0.75	-1.25	0.25	-2.25	-5.5	0	-0.25	-0.75	1.75
			43.12	-2.75	-0.5	-1.25	-5	-1.25	1.25	-0.75	0.25	0.25				43.12	-2.5	-3.25	-1	-6	-4	0.75	-0.25	-2	-2
			43.16	-1.75	-2.25	1.5	-1.5	0.25	0.25	-1	0.5	-1.25				43.16	-2	-4.75	-0.25	-5.25	-4.75	1	-0.75	-2	-2.5
			43.2	-0.75	-1.75	3.25	1.5	3	0.25	2.25	-1	-2.75				43.2	-2.25	-6.5	1.25	-3.25	-0.25	-1.5	0.5	-2.5	-3
			43.24	-0.5	1	0.75	1.75	4.75	1	1.5	-2.25	-3.75				43.24	-1.5	-4.75	-0.25	-0.5	2	-1.5	-0.75	-2.75	-2.25
			43.28	1.5	0.25	-0.75	1.25	3.75	2.5	-0.5	-0.75	-3.5				43.28	-0.25	0	-1.25	0.25	1.5	-0.25	-2.5	-0.25	-3.25
			43.32	1.5	-0.25	-0.75	3	1.5	3.25	-0.25	1.25	1				43.32	0.5	3.5	-1.5	1	0.75	0.25	-2.25	2.75	-1.75
			43.36	1	0.75	1.5	3.75	-2	2.5	0	0.25	3.5				43.36	0.75	0.5	-1	0.75	-2.5	2.25	-2	-0.25	-0.25
			43.4	1	-0.25	3.75	1.25	-1	1.25	-0.75	1.25	3.25				43.4	-0.75	-3	0.5	-2.25	-4	0.25	-1.5	-1.5	-2.25
			43.44	1.5	-1.5	1.25	0.75	0.75	1.75	1.25	-1	2				43.44	-2.5	-3.5	-1.5	-3.5	-2.25	0.25	-1.25	-4	-3.75
			43.48	1.25	-2.25	-3	0.75	2.5	2	-0.25	-3.25	1				43.48	-1	-2.25	-2.75	-2.5	1.25	0.75	-4.5	-5.5	-3.75
			43.52	0.75	-0.25	-2	1.5	2.75	3	-1.75	-5	-0.75				43.52	-1.5	-0.25	-2	-1.25	1.5	-0.5	-2.75	-4.5	-1.75
			43.56	0.5	1	1.25	1	2	4.75	-1.25	-3	-2.75				43.56	-1.5	-1.5	-1.75	0	-0.75	-1	-0.25	0	-2.25
			43.6	-0.75	0.5	1.5	-0.75	0.5	2.75	-0.75	0.75	-1				43.6	0.5	-1.25	-0.5	-0.25	-2.25	-1	-2.5	2	-2.75
			43.64	1	2.5	0.75	0	-0.5	1.25	-2	1.75	-0.25				43.64	1.75	1.25	-2.25	2	-3.25	-1.25	-3.25	0	-2.75
			43.68	2.25	4.75	-0.75	0.5	-2.25	0.75	-1	3.5	0				43.68	3	2.25	-3.25	1	-2	0.25	-2.5	-0.25	-2.5
			43.72	-0.5	4.5	-2	0.25	-1.75	2.5	1.25	5.5	-0.75				43.72	0.5	1.75	-3.25	-0.25	-1.75	-0.75	-1.25	0.25	-2.5
			43.76	-1.75	3.5	-1.25	0	-3.25	3.25	-0.75	1.5	0				43.76	0.25	0.75	-2.5	0.25	-3.5	-1.5	-0.5	-1.25	-1.5
			43.8	-0.25	2.5	0	-1.5	-4	3.25	-1	-1.25	0.25				43.8	1.25	3	-0.25	-0.75	-3.75	-0.75	-1	-3.5	-1.75
			43.84	1.75	0.75	-0.5	-2.75	-0.25	0.75	1.5	2	0.5				43.84	2	1.25	-0.25	-3.25	-0.25	-1.75	0.25	-0.75	-1.75
			43.88	3	0	-1.5	-3.5	2.25	0.75	4	2.5	0.25				43.88	2.5	-1.5	-2.5	-3.5	0.5	2	2.25	2.75	-1.75
			43.92	2.75	0.25	-1.25	0.5	3.25	0	2.25	0	0.25				43.92	0.75	-1.25	-1.25	-2	1	2.25	1.5	3	0.25
			43.96	0	-1.75	0	1	2.25	-0.5	-0.5	0	1				43.96	-2	-1.75	0.25	-1	0	-0.5	-0.25	0.75	2.25
			44	-0.25	-2	1.25	-0.25	1.75	-3	-3.25	-1	0.75				44	-2	-3	0.75	-2.75	0.75	-4	-3	-2.5	0.75
			44.04	-2.75	-1	2.5	0	0.75	-1.25	-3	-1.5	1.75				44.04	-2.25	-2.75	0.25	-2.25	1.75	-1.5	-3.75	-1.75	1.25
			44.08	-2	0	4.5	2.75	-0.75	-1.5	-0.75	1.75	3				44.08	0	-2.75	0.25	1.75	-1.5	-3.75	-3	0.75	2
			44.12	-0.75	-1.25	2.25	1.25	-1	0	-1	2.25	1.25				44.12	-1	-1.75	0.25	-0.25	-2.75	-4	-4.5	1.25	1.75
			44.16	2.25	-1.25	-1.25	1.75	1.5	-0.25	0.5	-1	-1.25				44.16	-1.25	-1.25	-1	0.25	-1	-2	-5.25	-2.25	-1.75
			44.2	1.5	-2	-1.5	0.75	2	1.25	2.25	-1	-2.25				44.2	0.25	0.25	0.5	-1.75	-0.25	1.75	-3.25	-2.25	-1.75
			44.24	0.25	0.5	0	0	-0.25	0.75	1	-0.5	1.75				44.24	-0.25	2.5	-0.75	-2.25	-1.75	2.25	-0.5	0.5	0.5
			44.28	0.5	0.5	-2.25	3.5	1	-2	0.25	-0.75	1.25				44.28	-1	1	-2.5	0.5	-3	-3.25	1.75	-0.75	-0.75
			44.32	-2	-0.75	-2.75	4.5	1.5	0.25	-0.25	-0.5	-1				44.32	-4	-1	-2.25	0.75	-4	-3.25	0.5	-1.5	-0.75
			44.36	-2.5	-2.25	-2.25	3	-0.5	2.25	0.75	1.25	-1.25				44.36	-4.75	-4	-2.25	-0.75	-3.5	0.75	-0.25	0.25	0
			44.4	-0.25	-1.25	0.75	2.75	-0.25	-3	2.5	2.75	0.25				44.4	-2	-5	-0.75	-0.25	0	-0.75	-1.75	1.25	0.75
			44.44	0	-1.25	2.75	2	0.75	-3	2.25	1.5	1.25				44.44	-1.25	-2	1.5	1.5	1.75	-0.5	-1.5	0.25	0.25
			44.48	1.5	-1.5	3	-0.75	0.5	0	1	0.5	0.5				44.48	-1	0.25	2	1.5	3	-1.5	0	0.5	-1
			44.52	0.75	-1.75	2.5	-2.25	-1.75	3.5	1.75	-0.75	-2.75				44.52	-1.5	0.25	-1.5	-0.75	-0.25	0	2.75	-0.75	-3.25
			44.56	-0.75	-0.5	0.75	-2	-2	4.75	0.75	-1.75	-1.75				44.56	-0.25	0.5	-2.5	-3.75	-0.5	1.75	1.5	-2.25	-1.75
			44.6	-1.25	1.25	0.5	-3.5	-0.75	2.5	-0.5	-0.75	1				44.6	-1	-0.5	-0.5	-5	-1.25	-1.75	-1	-2	1.75
			44.64	-0.5	1.5	-1.75	-2.5	-1	-0.75	-1.75	0.75	-1.25				44.64	-3.25	-2	-1.25	-2.75	-1.5	-2.25	-3.25	-0.75	3.5
			44.68	1	-1	-2	0	0.5	-1.5	-1.75	-0.25	-2.5				44.68	-2.25	-3	-3	-2	-0.25	-2	-5.5	-0.75	0
			44.72	1.25	-2.25	-1.25	-1	1	-1.25	1.75	-0.25	0.5				44.72	-0.5	-3.25	-2.5	-2	1.75	1.75	-3.5	-1	1
			44.76	1	-0.5	-2	-2	2.5	-0.5	1.5	1.25	3.75				44.76	-1.25	-2.75	-3.25	-3.5	3	3.25	-1.5	-1.5	1.75
			44.8	1.25	-0.5	-1.75	2.5	2.5	-3.25	0.25	0.75	5.25				44.8	0.25	-3.5	-1.75	-2.5	2.75	0.25	-1.25	-2.25	3.75
			44.84	1.5	2.5	-1	2.75	2.75	-1	-0.75	0.25	3.75				44.84	1.75	-0.25	0.75	-0.25	0.5	0	-1.25	1.75	1
			44.88	2.75	4.25	0.75	3.5	2.25	1.75	-3	1	2.5				44.88	2.25	3.25	1	3	-1.25	1.5	-2.25	5.5	-1.75
			44.92	1.75	2	3	0.5	3	1.5	-0.25	1.25	-0.75				44.92	1.25	2.25	0	1.5	0.25	1.25	0.75	3	-1.5
			44.96	1	-2	2.25	-4.25	2.25	0	1.5	0.75	-0.25				44.96	0.5	-0.5	-0.75	-0.75	1.75	-0.25	3	-0.5	0.25
			45	1.5	-4	2	-5	-0.5	1.75	0.5	-1.75	-0.5				45	0.25	-1.5	0.75	-1	-2.5	0.25	2	-1.75	-0.5
			45.04	0.75	-3.5	2.5	2	-4	0.25	-1.25	-2	-1				45.04	-2.75	-0.75	2	1.5	-6.75	-2.75	0.5	-1.75	0.25
			45.08	-0.25	-0.75	1	5.25	-2.5	0.5	-2.75	-3	-0.5				45.08	-3.75	-1.25	1.75	1.25	-3.5	-3.75	-0.25	-4.5	0.75
			45.12	-1.75	-0.5	0	2.25	-0.75	0.75	-0.75	-0.75	-2.25				45.12	-2.75	-2.25	-0.5	0.75	1.75	-3	-0.75	-5	-3
			45.16	-2	-0.25	-0.25	2.75	-1.5	2.25	-1.75	1	-2.5				45.16	-1.25	-2.25	-0.5	0.75	0.75	-3	-3.75	-2.75	-2
			45.2	-1.5	1.5	-0.5	2	0.75	0.25	-1	1.5	1				45.2	-3	-1.75	1	-1.25	0.5	-1	-3	0.75	0.75
			45.24	-2	1.75	0	1.5	-0.25	-1.25	-2	-0.5	1.25				45.24	-3.25	-0.5	-0.75	-1	0.75	0.5	-1.75	1.25	-1.25
			45.28	-3.75	-1	0.75	0	-2	-3.25	-1.75	-3	-0.5				45.28	-2.5	-2	-2.25	-1.75	-0.5	-0.75	-0.25	-2	-2.5
			45.32	-4.5	-2.5	0.75	3	0.25	-2.25	-0.5	-2.25	-3.5				45.32	-3.25	0.5	0.25	0.25	-0.25	-0.5	-1.75	-0.75	-4
			45.36	-4	-4.25	3.25	1	3.25	-4	-0.75	-4.75	-2.5				45.36	-2	2.5	2.75	1.75	0.25	-3.25	-1.75	-2.25	-1
			45.4	-0.75	-5.25	4	-2.75	-0.5	-4	0.5	-2.75	-1.5				45.4	1.5	-0.5	1.5	2.5	-3	-4.25	2	-2.5	1.25
			45.44	0.75	-2.5	-0.75	-3.25	-3.25	-3.25	0.5	1.75	-0.25				45.44	4	-1.5	-2	-1	-4.75	-1.75	2.5	1	1.5
			45.48	-0.5	1.25	-2.5	-0.5	-3.75	-0.75	-1	3.5	0				45.48	0.75	0.25	-3.75	-2	-5.75	1.75	-0.5	2.75	-0.75
			45.52	0	-0.25	-1	-2.25	-1.25	-0.75	0	2	0.25				45.52	2	-0.25	-3	-4	-1.25	1.75	-2.25	3.25	-0.75
			45.56	1	-4	-1.75	-1.5	1.5	-1.75	1	3	-2				45.56	2	-2.5	-0.75	-2.5	3	0.25	-0.5	6.25	-1.25
			45.6	0.5	-3	-0.75	1	1	-1.5	2.25	0.5	-4.5				45.6	-0.5	0.75	0.25	-1.75	3	-2.25	0	4	-3.75
			45.64	-0.5	-0.5	-0.25	2.5	-1	1.75	2.5	-1	-2.5				45.64	-3.25	0	-1	1	1.25	-3.25	0.5	0.5	-2.25
			45.68	-2.5	-0.25	-0.75	-1	-3	3	2.75	-1.5	-1.25				45.68	-2.25	-2.25	1.5	0.5	-2	-1.75	0.5	-3.5	-0.5
			45.72	-3.25	-1.5	-0.25	-4.75	-3.5	1.5	3	-2	0.5				45.72	-1.75	-4.75	2.25	-3.75	-2.75	-2	1	-6.5	2.25
			45.76	-1.25	-1.25	0.5	-4	-3	-0.25	0.25	0.5	0				45.76	0.25	-2	-0.5	-5.75	-0.5	-0.5	1.5	-4.25	2.25
			45.8	0.75	-1.75	-1.75	-1.75	-1.5	-1.75	-2.25	1.5	1				45.8	1.75	-0.25	-2.75	-2.75	0.75	-0.5	0.25	-1.25	3
			45.84	0.5	-0.75	-2.25	-2.25	-1	-2.75	-3.25	-0.25	-0.25				45.84	0.25	0.75	0.5	-0.25	-1.25	-2.25	-1	1	-0.5
			45.88	-0.25	0.25	1.5	-1.25	-2.25	0.25	-2.25	-1	0.25				45.88	-1.75	0.75	2.5	0.75	-3.5	-1.25	-2	1	-2.25
			45.92	-0.5	-0.5	0.25	-2.25	-2	0.75	-1.5	-2.25	1.25				45.92	-3.25	-1.25	-0.75	-1.25	-1.75	1.25	-2	0.5	1
			45.96	0.25	1	-4	-1.25	-1.25	2.25	1.75	-1.25	-1.25				45.96	0	0	-2.5	0.5	1.75	1.75	-0.5	0.75	1
			46	1.75	-1.25	-3	-2	-0.25	2.25	0.25	-0.75	-2.75				46	2.75	-1.5	-3.5	2.75	2	-1.25	-1.5	0.25	1.75
			46.04	0.75	-3.75	0.5	-2.75	-1.75	-0.25	-0.5	-1.5	-3.75				46.04	-0.25	-4.25	-1	0	-0.25	-2	-0.5	-2.25	0.5
			46.08	-2.5	-3.5	1	-2.5	-2.5	-1.5	-0.75	-1.5	-1				46.08	-2	-4.75	1	-1.25	-3	-2	1	-2	-2
			46.12	-1	-1	0	1	-0.5	-3	-1.5	0.5	-1.5				46.12	-1.5	-2	1.5	2.25	-3	-1.25	-1	-0.5	-3.25
			46.16	-0.75	-3	-1.5	1	-2.75	-0.75	-1.5	0.25	-2.5				46.16	-1	-1.25	2	2.5	-3.75	-0.25	-2	1	-4.75
			46.2	-2.25	-3	-1.5	-2	-4.5	-2.25	-0.75	-1.75	-2.25				46.2	-0.75	-1	0.5	-0.75	-2.5	-1.5	-1.5	0	-2.75
			46.24	-3.75	-1.5	-4	-4.5	-0.5	-3.25	-0.75	-1.25	-1				46.24	-1.75	0.25	-3	-4	-1.5	-2	-1.25	1.5	-0.25
			46.28	-3.25	-2	-3.25	-3.25	3.5	-2	-1.25	-0.25	-4.5				46.28	-0.25	-1.5	-4.25	-1.75	0	-1.75	-3	0.5	-0.5
			46.32	-1	-0.5	-0.25	-1.75	1.25	-1	-1.25	0	-4.75				46.32	0.25	-0.25	-3	0.75	-0.25	-0.25	-2.75	-1.25	-1
			46.36	1.25	1.75	3.25	0	-1	-1.5	-0.75	0	-0.5				46.36	2	1.75	1	0.5	-1.75	-0.25	-3.25	-1.25	-0.75
			46.4	-0.5	2.25	3.25	0.5	-1.25	-1.75	-0.25	0.25	1.75				46.4	-2.25	2.75	4	-1.75	-1.75	-0.25	-1.75	0.5	-1.5
			46.44	-0.5	0.75	1.5	-1	0	-2.5	-0.25	-1.5	1.75				46.44	-3	1.5	3.5	-4.5	-2.5	0	-1.5	-1.25	-3
			46.48	-0.25	-0.5	0.5	-0.5	-0.25	-3	-0.75	-3.75	1.25				46.48	-2.75	-0.5	2.75	-6	-2	-1.25	-1	-4	-2.25
			46.52	-0.25	1.5	-3.25	-0.75	-2	-4.25	1	-4.25	-0.25				46.52	-2.25	0	-1.25	-5.75	-2.5	-3.25	0.75	-3	-1.25
			46.56	-1	1.25	-3	0.5	-0.5	-0.5	2.5	-4	-2.5				46.56	0	-3	-5.5	-1.75	-1.25	-0.75	2.5	-3	-0.25
			46.6	-1.75	1.5	-1.5	2	1.75	3.75	2.25	-2	-0.5				46.6	-0.75	-1.75	-4.75	-0.75	1.5	1.25	1	-2.25	2.75
			46.64	0.25	-2	-1	1.25	0.25	4.5	0.25	-1.25	-2				46.64	-1.25	-1	-1.5	-0.5	-0.25	1.5	-0.5	0	1.5
			46.68	0	-2.25	-2	-0.75	-3.25	0	-1.5	-0.25	-3.25				46.68	0	-1.25	-2.75	-0.25	-4	-0.5	-0.75	-0.25	-2
			46.72	-2	-1.75	-2.5	-1.5	-4.5	-1.25	-2	0.25	-3				46.72	-2	-2	-5.25	-1.5	-5	-1.25	-1	-1.25	-5
			46.76	-1.75	-0.75	-2.25	-2	-2.75	-1	-1.5	-0.25	-1.75				46.76	-4	-3.5	-4	-2.5	-3	0.5	-0.75	2	-3.75
			46.8	-2.75	-1.5	0.25	-4	-0.5	-1.75	0.25	0.5	0.25				46.8	-3.25	-3.25	-1.5	-0.25	-0.25	-1.25	-0.5	2.75	-1
			46.84	-3.25	0.5	0	-3	-1.25	-0.75	0.5	0	1.75				46.84	-1	-0.25	0.75	-2	0.25	-2.5	-2	2	3.5
			46.88	-1.75	-0.25	-2	0.25	-0.75	0	1	-2	-1.5				46.88	-1.25	0.75	1.25	-1.75	0.75	-2.25	-1	1.5	4
			46.92	2.25	-2.5	-1.5	-0.25	-0.75	0.5	-0.75	-3.5	-0.25				46.92	-0.5	0.5	-0.25	-2.75	0	-0.5	-0.75	0.5	3.75
			46.96	0.75	-2.5	-3	-0.25	-1	-0.5	-1.75	-5.5	3				46.96	0	1	-2.5	-3	-1.25	-2	0.75	-2.5	3.5
			47	0.25	-0.5	-4	0.5	0	-0.25	-1.5	-3.75	1.25				47	1.25	1.5	-0.25	-1.25	-1.25	-2	-0.25	-2.75	2
			47.04	-1.25	1.25	-1.25	-0.25	1.75	-2.75	-1.5	0	-1.75				47.04	-1	0.75	2.75	-0.25	0.25	-3.5	-1.75	-1.75	-1
			47.08	-2.5	-2.75	1.75	-0.75	1.25	-4.75	1.25	-0.5	-1.25				47.08	-2.5	-4.25	2.5	0.75	0.75	-4.5	-0.25	-1.75	-3
			47.12	-1.5	-6	2.75	-1.25	-1.75	-3.25	3	-3	-1.25				47.12	-3	-8	1.25	1	0.5	-1.5	-0.5	-3.5	-4.75
			47.16	1.75	-2.5	1	-1.75	-1	-1	-0.25	-0.25	-0.25				47.16	0	-5.25	-0.5	0.5	2.25	0.75	-0.25	-2.25	-3.5
			47.2	1.25	2.5	-0.25	-1.75	-1	0.5	-2	2.25	-0.5				47.2	3.5	-0.25	0	-1.25	-0.75	0	0	-2.5	0
			47.24	-3.25	0.25	-3.25	0.5	1	-0.5	-3.75	-0.5	0.75				47.24	2.75	0.5	0.25	-0.25	-2	0.25	0.25	-4	2
			47.28	-0.75	-2.25	-5.25	0.75	3.5	-2.25	-1.75	-1.25	-2				47.28	1.75	-0.5	-0.75	1.75	-1.75	-0.75	1.25	0	0.75
			47.32	-0.25	-0.25	-3.75	-0.25	0.75	-3.5	-1.75	-2.5	-0.25				47.32	-0.25	-0.75	-0.25	0.75	-2.25	-3.25	-0.5	0.75	0.75
			47.36	-1.75	0	-2.25	-1.75	-0.25	-1	-1.75	-2.25	-0.75				47.36	-2.25	1.25	-0.75	-1.75	0	-2.5	-2.25	0	-3.75
			47.4	2	-0.75	-1	-2.5	-0.5	-0.5	-0.75	-0.5	-2.25				47.4	0.75	2.25	-2.25	-2.75	0.5	-1	-0.75	-2.75	-5.5
			47.44	5	-2	0.5	-0.25	-0.5	-1.75	-0.25	-0.75	-3.5				47.44	2.5	1.25	-4.5	-0.5	1.75	0.5	0	-2	-3.75
			47.48	2.25	-3.25	1	2.75	-2	-1	1.25	-0.25	-0.75				47.48	2.25	-1.75	-3.25	0	3.25	0.25	-1.25	-1.75	0.75
			47.52	-0.5	-0.25	-3	2.25	-4.25	-1	0.75	-0.75	1.75				47.52	-1.5	0.25	-1.5	0.5	1.25	0.5	-5	-0.5	1.75
			47.56	-0.25	1.75	-5.5	2.5	-4.75	-2.25	-1.75	0.5	-2.75				47.56	-3	2.25	0.25	3.75	-3.25	-1.75	-5	1.5	-0.75
			47.6	1	2	-3.25	2.75	-0.25	-2.5	-0.25	-1.75	-3.5				47.6	-2.75	0.25	0.5	3.5	-2.5	-1.25	0.25	-0.75	-3.25
			47.64	-1	-0.5	-1	2.75	0	-3	1.75	-1	-1.5				47.64	-4.25	-2.25	-0.5	3	0	-1.5	2	-2.25	-3.25
			47.68	-1.25	1	-0.25	0.75	-1.5	-1	0.5	0.25	1.5				47.68	-2.25	0	-1.25	1.75	-1	-1	0.75	-1.25	-0.75
			47.72	-2.5	1.25	-1	-2	-0.5	-0.25	-0.25	1.75	1.25				47.72	2.25	1.75	0.75	-1.25	-1.5	-1.75	-1.75	0.25	-0.25
			47.76	-3	1	-0.75	-1.25	0.5	1.5	-1	3	-2.25				47.76	1.25	2	1.75	-3.25	-1.75	-0.5	-3.25	2	-0.5
			47.8	-0.5	-2	0.75	-3	-0.75	1	-0.75	-1	-4				47.8	-2	-0.25	1.5	-3.75	-1.5	1.25	-4	0.25	-1
			47.84	-0.75	-1.5	1	-5.25	-2.5	0.25	-0.25	-2.5	-3				47.84	-3.25	-1.25	0.25	-4.75	-2.5	-1	-3.5	0	1
			47.88	-2.75	-1.75	-1	-2	-1.75	0.25	-2.25	-0.5	-3.25				47.88	-3.5	-1.75	0.25	-1	-2.25	-0.25	-3.5	1.5	1.25
			47.92	-2.5	1	0	-1.5	1.75	-2	-4.75	-0.5	-2.5				47.92	-2.75	-1.75	0.75	0	0.25	-1.5	-3.5	1	1.25
			47.96	-2.25	0.75	1	1	2.75	-0.25	-5.5	-0.25	-2.25				47.96	0	-1.75	0.25	2.75	-0.75	0	-1.75	0.5	-2.75
			48	-0.25	-1.75	1.25	0.75	1.25	1.5	-2.75	-1	-1.25				48	0.75	-2.5	-0.75	0.25	-1.5	1.25	1.75	-0.25	-1.75
			48.04	1.75	-1.5	2	-1.75	-1.75	-1.75	0	-0.5	0.5				48.04	2.75	-0.5	1.75	-2.75	-2.5	-1.5	2	-2.75	1.5
			48.08	0	-0.5	2.25	-4	-3.25	-4.25	2.75	-1.25	-1.75				48.08	3.75	0.75	5.5	-5.5	-2	-1.5	1	-3	0.25
			48.12	-0.75	-0.75	2	-1.5	-2.25	-3	0.75	-1	-3				48.12	2	1.5	4.5	-4.25	0.25	-0.25	-2.5	-2.25	-0.25
			48.16	0	-0.25	1.75	1.75	-2.25	-1.75	0	-2	-2				48.16	1.5	1.5	1.75	-1.5	-0.25	-1	-2	-1	0.75
			48.2	-0.25	2.75	1.25	-0.5	-2.5	1	-0.5	-3.5	-1				48.2	1.5	0.75	-0.75	-0.25	-1.25	-1	1.25	-1	0
			48.24	0.75	2.25	0	-1	-1.5	4.25	-3.25	1.25	-1.25				48.24	1.5	0.5	-2.75	-2	-3	2.5	0	0	-2.25
			48.28	2.25	-0.75	0	1.5	-1.5	4.75	-2.75	3.5	-2.5				48.28	2.25	1.5	-0.25	-0.75	-3.75	4.5	0.75	1.75	-2.5
			48.32	3.5	-2	0.5	1.75	-1.5	4.5	2	1.25	-3.25				48.32	1.25	1	-0.25	1.5	0.5	3.25	1	2.75	-1.75
			48.36	0	-0.5	1.75	-0.5	-0.25	3.5	-1.25	-1.25	-1.25				48.36	-0.25	-0.75	2.25	-0.25	3.75	3	-3.25	-0.25	-2.5
			48.4	0.75	-2.25	-0.5	0	-1	0.5	0	-0.5	1				48.4	0.5	-2.75	1.5	-1.5	-0.5	-2.25	-4.25	0	-1.25
			48.44	0.75	-1	-5	-1	2	-4.25	1.25	-0.75	1				48.44	0	0	-2.25	-1.75	-0.75	-4.75	-2.25	0.5	1.25
			48.48	-1	0.25	-5	-3.5	3.75	-3	1.25	-1	-0.5				48.48	-0.75	1.25	-4.75	-3.75	0.25	-2.75	2	1.25	1.75
			48.52	-2.25	-0.5	-3.25	-4.75	4.25	-4.75	-1.75	-0.5	0				48.52	-1.5	0.5	-3	-3.25	2.5	-1	2.5	0.5	1
			48.56	0	-2.25	-2.75	-0.75	2.75	-2.5	-2	-1.5	0.5				48.56	-1.25	-0.5	1.25	1	2.75	2.75	1.25	-1.75	2.25
			48.6	-2.25	-2	-0.5	3.25	-0.75	-0.75	-0.5	-4.5	1				48.6	-2	1.75	2.75	3.75	3	3	0	-4	-1
			48.64	-3.25	-0.25	-0.5	2	-1.5	-1	0.25	-4.5	2.5				48.64	-0.5	1.75	-1.5	3.75	2.75	0.5	-1.75	-2.75	-2
			48.68	-3	2.75	2	-2.25	-2	0	0	-1.75	0.25				48.68	0.5	2	0.25	2.5	0.25	0.25	-2.75	-1	-1
			48.72	-1	1.5	3.5	-4.25	-2.5	3.25	-0.5	1.75	-1.25				48.72	-1	0.5	2.25	1.25	-2.25	0.5	-2.5	1.5	-0.25
			48.76	3	-2.25	1.25	-2.5	-4.25	5.25	-1.75	3.25	-1.5				48.76	-0.25	-2	-0.25	-0.25	-2	5	-0.75	2.25	0
			48.8	3.5	-4.75	0.25	0	-2.25	3.25	-1.25	2.25	-2.75				48.8	1.75	-2.75	0	0.25	-0.75	4.5	1.25	2.75	-0.25
			48.84	1.75	-2	0	0.75	0.5	2.25	-1.25	2.25	-4.75				48.84	1.75	-0.25	-0.5	-0.25	1	4.25	1.75	1	-2.25
			48.88	-1.5	1.25	-2.5	-0.5	1	-1.25	0	0.5	-1				48.88	-0.25	1	-2.25	-3	-1	1.75	1.75	1.25	-2.75
			48.92	-1.5	1	-3.25	-0.25	0.5	-0.75	1.25	1	3.5				48.92	-1.25	-0.75	-3.25	-0.25	-0.25	-0.25	2.25	2	-0.25
			48.96	0.75	-1	-3.25	-0.75	0	-0.5	1.5	1.25	4.25				48.96	2	-1.5	-0.75	2.5	-0.25	-1.25	1.75	0.25	0.5
			49	0.75	-2.25	-3	-1.75	-1.5	-2.75	2	1	-0.25				49	2.25	-0.75	-1.75	0.25	-1.25	-2.75	0.75	-1.5	-2
			49.04	-2.5	-2.75	0.25	0.25	-1.25	-5	-0.25	-0.25	-2.5				49.04	-1.5	1	-1.25	-1	-0.5	-1.25	1.5	-0.75	-3.75
			49.08	-3.5	-2.5	3	2.25	0	-4.25	-1	-2.5	-2.25				49.08	-2.25	1.75	2.75	2	2.25	1.5	1.5	-0.75	-2.25
			49.12	-2.75	0	2.5	-0.5	0	-2.25	-2.5	-1.5	-2.5				49.12	-2.75	1.75	4.75	2.5	3.25	0.75	0.25	2	-1
			49.16	-1.75	0.5	3.25	-0.75	0.75	-2.75	-3	-2.75	-3				49.16	-1.75	0.5	5.5	1.5	3.5	1.75	0.5	1	-2.25
			49.2	0.25	-1.25	1.75	-0.5	1.5	-3	-2.5	-3.5	-0.75				49.2	-0.5	-0.75	2.75	-0.75	2	-0.5	0	-0.75	-1.25
			49.24	0	-2.5	0.75	-0.25	-0.75	-1	-0.75	-2.25	1				49.24	0.5	-1	1	-0.25	-1.5	-3.25	-2.5	-1	1.5
			49.28	-0.75	-1	3	-0.25	-1.75	0.5	2	-1.75	1.25				49.28	-0.5	0	1.25	2	-2.5	-3.25	-1.75	-3.5	3
			49.32	-2.25	3.25	1.25	0.25	-0.75	-0.75	3.75	-3	-1.5				49.32	0	1	-3.25	2.25	-0.75	0	1.5	-3.5	2.5
			49.36	-1	3.25	-0.75	1	-0.25	-3.75	3.5	-2.5	-2				49.36	1.25	0.25	-5	1.25	-0.75	-1.75	3.75	-2.5	1.5
			49.4	-2.25	1.25	-1.25	0.75	0.75	-3	1	-2	-0.5				49.4	-0.75	0.25	-2.25	-1.25	-1.25	-1.75	0.75	-1	3
			49.44	-2.25	0.5	-0.25	1.5	1	-2.5	-1.25	-0.75	0.25				49.44	-1	0.5	0.5	0.5	-1.75	0.25	-2.75	0.5	3
			49.48	-0.75	-2.75	2	2	0	-2.75	-0.75	-2.25	-0.5				49.48	1.5	-0.25	2.75	0.25	-1.5	-0.25	-1	-1	0
			49.52	2	-2.5	-1.5	-0.5	0.75	2	-0.75	-1.75	-0.75				49.52	4	-1.5	2.75	-1.25	0.25	1.25	-0.25	-1.5	0
			49.56	1.5	-1	-3.75	-2.5	1.75	5.75	0.5	0.5	-1.25				49.56	1.25	-2.25	1	-2.25	0.5	1.25	-0.25	-0.5	0.75
			49.6	-3.5	0	-1.5	-2	-0.5	3.75	0.75	3.5	-1.75				49.6	-1.75	-0.75	-1.25	0	-1.75	2.5	0.75	3.5	0
			49.64	-2.25	1.25	-0.25	0.75	-2.75	-0.5	-1	4.25	0.25				49.64	-0.25	0.25	-1.75	2.75	0.25	2.25	-2.25	4.75	2
			49.68	0.25	-0.75	-1	1.75	-3.75	-0.75	-2	-1	0				49.68	3	-2.25	-0.5	2	0	1	-2.75	1	1.25
			49.72	2	1	-0.25	-0.75	-2	0.25	1	-3	-0.75				49.72	4.5	0	1	-0.25	-0.25	-0.5	1.5	-2.5	2.5
			49.76	2.75	2.25	-0.75	-3.5	0.25	2.25	2.25	0.75	-4.5				49.76	4.5	2.25	1.25	-3.25	1.25	-0.25	3.5	0.5	-0.5
			49.8	1.25	-0.5	0	-4.25	0.75	3.25	-1.25	4	-6				49.8	1.5	0.75	0.75	-2.5	1.75	0.75	3	4.5	-3.75
			49.84	0	-2.25	1.75	-4.5	-0.25	2.25	-1	3.75	-2.5				49.84	0	0.5	-0.25	-0.25	3.25	0.5	1	3	-0.75
			49.88	0	-2.5	0.25	-3.75	0.75	1.25	1.75	0.75	1.25				49.88	2.25	2.5	0.25	0.75	3.25	2	2.75	0.5	3
			49.92	0.5	-0.5	-2	0.5	0	0.75	0.5	-2.25	2.25				49.92	2.5	4.5	-0.5	1.75	2.5	0.25	3.75	-0.25	3
			49.96	-2	-1.75	-3.75	5	-2.75	-0.5	-1	-2.5	0.25				49.96	0.75	0.25	-0.5	3.25	1.25	-0.25	2.75	-0.75	-0.75
			50	-1.75	0.5	-1.75	2.25	-0.75	-2.25	-3.5	-0.25	0.25				50	-1.25	0.5	3	1.75	3.25	-1.75	0.25	0	-1.75
			50.04	-1	-1.25	0.25	-2	0.5	-2.5	-3.25	1.25	-0.75				50.04	0	-1	4	0.75	2.75	-0.5	-1.75	-0.5	-0.25
			50.08	-1.75	-2.25	0.5	-3.75	-0.5	-1.75	-1.5	-2	-2				50.08	0.5	-0.5	2.75	1.5	-0.5	2	-0.75	-1.75	-0.5
			50.12	0	-1	-0.25	-3.25	-3.75	-1	-0.25	-5.25	0.75				50.12	0.5	-0.75	0.75	3.5	-3	3.25	1.5	-1.25	-0.25
			50.16	-1	0.25	-1	-1.5	-1.5	0.5	2	-3.25	1				50.16	1.5	-0.25	-1.5	2.75	-1.75	2.75	3.5	1.25	-0.25
			50.2	-3	1.5	-3.5	1.75	1.5	-1	0.75	1.25	-0.75				50.2	1.75	2.5	-0.75	5.25	0.5	1.25	1.5	5	1.25
			50.24	-3.5	0.75	-3	1.75	1.25	-1.5	-2.25	-0.5	-2.25				50.24	1	1.5	0.75	5.75	1	0.5	-1.5	5.5	2.5
			50.28	-0.5	-1.25	-2	0.5	-1.75	-0.25	-4	-0.25	-4.5				50.28	1.25	-0.5	0.75	2	-0.75	1.5	-3	3.25	-0.75
			50.32	2.5	-3	0.75	1.75	-1.75	-1	-4	0.5	-5				50.32	2.75	-1	1.5	2.5	0.25	1.25	-2.75	0	-3.25
			50.36	0.5	-2.75	-2.25	-1	-2.25	-3.5	-1.75	-0.5	-0.5				50.36	3.25	-0.75	1.5	1.25	-1.25	-0.75	-1.25	-2.25	-1.5
			50.4	-1	-1	-7	-5	-0.25	-3.25	0	-0.5	1.5				50.4	1.5	-0.25	-1.75	0	2.25	-0.5	-0.25	-1	1.75
			50.44	-2	-3	-5.25	-4.25	0.75	-3	0.5	0.75	-0.75				50.44	0.25	0.75	-1.75	0.75	4	-0.75	2.5	1	3
			50.48	-2	-3	-0.5	-2.25	-0.75	-3	-1	-1	-3.5				50.48	0	1.25	-0.25	0.5	1	-0.25	3.5	0.5	1.75
			50.52	-2.25	-1.25	1.5	-2.25	-0.25	-4	-4.5	-4	-4				50.52	0	2.25	1.25	0	-0.5	-1.5	0.75	0.75	-0.5
			50.56	-1.25	0.75	-0.75	0	-2.25	-1.5	-5.75	-4.75	1.5				50.56	0.75	4.5	1.25	0.25	-0.5	-1	-3	2	3.5
			50.6	0	1.75	-1.25	2.25	-2.25	-1.75	-2.75	-4.5	2				50.6	0.75	3.5	1.25	0.5	-0.5	0.25	-2	2.75	4.5
			50.64	0.25	0.75	2.5	1	-0.5	-3.25	-2	-4	-0.25				50.64	0.5	2.5	2.25	-1.75	1.25	0.75	-0.25	2.25	2.75
			50.68	-0.25	-0.25	3	-3.75	0.75	-5	-4.25	-3.25	-2.5				50.68	-0.75	3	2	-4	3.5	-2.5	-0.5	2.5	-0.75
			50.72	0	-0.75	-0.5	-5.5	-0.25	-2.75	-3.75	-1	-3.25				50.72	1	1.5	1	-2.75	2	-2.25	-2.75	1	-1.75
			50.76	0.75	0.25	-1.75	-1.25	0	-0.75	-3.25	-3	-3.5				50.76	2.5	0.5	1	2.5	1	-0.5	-4	-0.25	-1.75
			50.8	-0.75	2.5	-1.5	1.5	1	-0.25	-0.75	-2	-1.25				50.8	1.75	3.25	1.25	3.5	0.25	2.25	0	1.25	2
			50.84	-1	2	-0.75	1.25	-0.75	1.5	2	1.5	0.25				50.84	1.5	3	-1	0	-1	3	5	3.75	5
			50.88	-0.75	0	-1	1	-2.75	3	2.5	2.75	0.25				50.88	-0.75	1	-2	-1	-1.25	2.5	5.5	5	1
			50.92	-1.75	0	-3.25	-0.75	-3.25	0.25	-2.25	2	-0.25				50.92	-2	0.25	-1.75	0.25	-1.25	1.75	1.75	4.75	1
			50.96	-4.25	2.25	-3.25	-3.25	-1.5	0.5	-3.25	-1.5	-2.25				50.96	-3.5	1	1.5	2.25	0.75	1.25	0.25	2.25	2
			51	-3.75	-0.75	-1.75	-2.5	-2	-0.5	-0.5	-4.75	-1.5				51	-3.25	-2.5	3	1.75	0.25	1	0.5	0.75	1.25
			51.04	-1.75	-5	-0.5	-2	-3.25	0.75	-0.25	-7.5	2.5				51.04	-1.5	-3	1.5	-0.25	-1.75	2.5	0	-3.5	3.5
			51.08	-2.25	-5.25	-1.25	-2.5	-2.25	1.5	0.75	-4	3.5				51.08	-0.25	-0.25	-1	-1.75	-1	2.25	0	-4.75	4
			51.12	-1.5	-3.5	-1.75	-1	0	-0.75	-0.25	1.5	-0.75				51.12	2	-1.25	0.75	-1.75	2.5	1.5	-1.5	-1.25	0.75
			51.16	1.25	-1.25	-0.5	0.5	1	-0.75	0.5	2.25	-1.25				51.16	3.75	-0.5	4	0.5	2.25	2.5	-1.75	-1.5	-1.75
			51.2	1.5	1	-1	-0.75	0.25	-1.5	-1	0.75	-1.75				51.2	3.25	1.25	2	1.5	1.75	1.25	-0.25	-0.5	-3.5
			51.24	0.75	0	-1	-1.75	-1.25	-1	-5	-1.5	-3.5				51.24	1.5	1	-1.75	3.5	1	2.25	-0.75	2.25	-3.25
			51.28	-0.25	-0.25	-0.5	-3	-1	0.5	-4	-1	-1.75				51.28	0.75	2.25	-2	3.25	-0.25	3.5	-1.25	3	0.5
			51.32	-3	-1.75	-0.25	-4	-0.75	-2.25	-0.25	-1.25	-3				51.32	-1.75	-0.25	3.5	0.75	0.75	1.25	0.25	2.5	-1
			51.36	-4.75	-0.75	0.75	-2.75	-2.25	-2.75	0.5	-1.75	-0.75				51.36	-1.25	-2.25	3.5	-1	-0.5	0.25	2	0.75	0.75
			51.4	-2.5	-0.5	1	-1	0.75	-1	-1.25	-2.5	1.25				51.4	2	-2.5	2.75	-1.25	1	-0.75	3.75	-0.25	2.5
			51.44	-3.5	-3	3	0.75	3	-0.5	-3.75	-1.5	-1				51.44	3	0.5	4.75	-1	3.25	-1.5	2.5	0	-0.25
			51.48	-0.75	-2.5	-1	-1	1.5	-1.25	-1.75	-1.25	-2				51.48	2.5	3.75	2.25	-0.75	4	-0.25	0.5	-0.75	0.25
			51.52	1.75	0.75	-3	-1	0	1.5	-1.25	-1.5	1.25				51.52	1.5	2	-2.25	-0.5	1	2.75	0.25	0	1.75
			51.56	1.25	0.5	-2.75	0.5	1	1	-3.25	-1.25	3				51.56	0.75	0.25	-2.5	-0.25	1	4.5	-1.25	2.5	2.5
			51.6	-2	0.5	-3	0.25	-0.5	0.5	-3.75	1	1.75				51.6	1.5	1.75	-2.5	0.25	2.5	3	-0.75	3	1.5
			51.64	-2.75	-1.75	0.5	0.5	-3.25	1	-0.75	2.5	-1.5				51.64	2.5	0.25	-0.25	1.5	1.5	0.75	1.75	4.25	-0.25
			51.68	-2	-0.75	2.5	-1.75	-1	-1.25	1.75	1.5	-2.5				51.68	1.75	0.25	1.75	1	4.25	-1	2.5	1.75	0.25
			51.72	0.25	-1.5	0	-2.5	0	-4	1.75	-0.25	-0.25				51.72	0.5	-0.75	1.5	3.25	5.5	-2	1.5	-0.25	2.25
			51.76	-0.75	-4	-0.75	-2.5	1	-2.5	-0.5	-1.25	0.5				51.76	-0.75	-3.25	1	1.25	4.75	1	-0.5	1.25	1.25
			51.8	-2	-3.5	-1.25	0.75	1.5	-0.25	-3.25	-0.75	-0.5				51.8	-0.25	-2.75	0.25	0.75	2.5	3.25	-3.25	2.5	-0.75
			51.84	-2.5	-0.5	-3	3.25	-0.5	-0.25	-0.25	-2.25	-0.25				51.84	0.5	-0.25	-0.5	1.5	-1	2	-0.5	2	0.25
			51.88	-0.75	1.5	-3.25	-0.75	-2	-1.25	1.75	-3	0.5				51.88	1.5	1.25	0.75	0.75	-4.5	-0.75	1.25	1.75	2.75
			51.92	-0.75	1	-2.25	-2.5	0	-0.5	3	0.5	-1.5				51.92	0.5	3	2	0.25	-1.5	1.25	2	1.25	1.25
			51.96	-1.5	-1.75	-1	-1.5	-0.25	-1.5	1.25	3.25	-1.5				51.96	-1.75	2.5	0.25	0	-0.75	-0.5	1.5	2.25	1.25
			52	-1.75	-1.5	-3.25	-1.75	-1	-4	-1	-1	-3.5				52	-2	1.5	-1.5	0.25	1.5	-3.5	-1.25	1.5	1.25
			52.04	-1.5	-1	-1	-1.25	1.25	-3.75	-1	-3.5	-3				52.04	0.75	0.75	-2.25	2.25	3.75	0.25	-2	-1.25	0
			52.08	0.75	-5.5	-1.25	-1.75	2.5	-1.75	1	-3.75	0.5				52.08	1.75	-2.75	0	2.25	2.5	3.25	1.25	-2.25	3.5
			52.12	1.75	-4.5	-2.75	-3	1	0.5	1.5	-2.5	-2.5				52.12	0.5	-1.5	0.75	0.5	-0.5	3.75	3.75	2	0.75
			52.16	0.5	-2	-0.25	-2.25	1.5	-0.25	-1.75	-1.5	-4.5				52.16	2	0.25	1.75	-1	0.75	4	1.5	2.75	-1.25
			52.2	2	-1	0.5	-1	0.75	-4	-2.5	-0.25	-3				52.2	4	1.5	-1.5	-1.25	1.5	-0.75	0.75	0.5	0.5
			52.24	3.75	-1.75	-0.75	1.75	-1.75	-4.75	-2.5	0	-3.5				52.24	4.25	-1.5	-2.75	1.25	-0.25	-4	2	1	2
			52.28	3.75	0	-1.25	2	0	-1.25	-2.25	1.75	0				52.28	3.75	1	-1	1.5	0	-1.5	-0.5	2.5	1
			52.32	0.75	1.25	-0.75	-1	1	-0.25	1	2.75	4				52.32	1.25	4.25	0.5	0	2	-0.5	-1.25	1	0.75
			52.36	-5.75	1.25	-0.25	-0.5	-2.25	0.75	2.25	2	0.25				52.36	-1.75	3.75	2.25	1.25	2	1.5	-1.25	-0.25	0
			52.4	-7.75	3.25	0.25	-0.5	-2.25	0	2.25	-2.25	-0.75				52.4	-1.25	2.5	4.25	2.5	-0.75	1.25	0	0.75	0
			52.44	-2.25	2.5	1.5	0.25	-0.75	-1	-0.5	-4	-0.75				52.44	2.5	0.5	4.5	3.5	-0.75	2	1.25	0.25	0
			52.48	-0.75	0	-0.25	1.5	-4	-2.5	-2.5	-4.25	-1.75				52.48	3.25	-1.5	0.5	3.75	-1.5	3	1	-1.75	-0.75
			52.52	-1.5	1.75	1.5	1	-1	-2.25	-1.75	-2.5	-1.75				52.52	0.75	-1.25	-1.5	1	0.25	2.75	0.25	-2.25	-2.25
			52.56	-0.25	0.25	2.5	-1	3	0	0	1	-2				52.56	1	0	-2.5	-1.25	1.75	2.75	0.5	0.5	-2.25
			52.6	0.5	-1	2.75	-0.75	2.75	3.25	3	3.25	-0.75				52.6	0.5	2.75	1.25	0.25	1.25	3.5	1.5	3	-1
			52.64	0.5	0	-1.25	-0.75	1.75	4.25	3.75	2.5	-1.25				52.64	-1.25	3.25	0.25	-0.75	2	2.25	2.25	1	1.25
			52.68	0.75	-0.5	-3	-1	1.5	0.5	2	1.75	-1.5				52.68	-0.75	0.5	-1.5	-2	2.25	1.5	1.5	-0.25	1.25
			52.72	-1.5	-1.75	-0.25	-0.75	0.75	0.25	0.75	-0.5	-1.25				52.72	-1	-1.5	0.25	0	0.5	1.75	1.5	0.75	-0.25
			52.76	-2.25	-4.75	2	-0.25	0.5	1.25	-2	-0.25	-2				52.76	-1	-1	1.5	-1	-1.25	0.5	-1.75	3	-2.25
			52.8	-0.25	-2.5	1.25	-0.25	-0.5	-0.25	-2.75	0.5	-2.25				52.8	1.5	0.25	-0.5	-2.25	-3.5	-2	-3.5	1	-1.75
			52.84	0.25	2	-2.5	-2	-1.75	-1	-1.25	2.5	-1.25				52.84	3	1.25	-3.5	-0.5	-3.75	-2.5	-1.5	1.5	2.25
			52.88	-0.5	1.75	-4.25	0.5	0	-1.5	1.75	1.5	0				52.88	2.5	0	-0.75	2.5	-1	-0.25	2.75	-1	3.5
			52.92	1.25	0.75	-1.25	1.75	0	0	1.5	-2	0.25				52.92	1.75	-0.75	2.25	4.25	1.5	1.75	4.5	-3	1.75
			52.96	2	0.25	0.5	-1	-2.5	1.25	1	-1.75	0.25				52.96	2.5	-0.5	1	2.5	0.5	0.75	3.5	1.5	1.75
			53	1	2	0.75	-1.75	-2.75	0.75	-0.5	-0.25	2.25				53	2.5	3.25	-0.5	0	-0.75	-1	1.5	3	1.25
			53.04	0.5	3.25	-1	-1	1	-1.5	-0.5	0	2.25				53.04	0.25	5	-0.5	0	2	-1.75	-0.5	1.5	0.25
			53.08	1.25	2.5	-2	0	2.5	-2.75	0	-0.25	0.5				53.08	-1.25	2.25	0.25	0.5	4.5	-2.25	-1.25	-2.25	0.75
			53.12	1	2.5	-0.5	1.25	1.5	-1	-0.25	-2.75	-1.25				53.12	0.25	2.25	1.25	1	3	-0.5	0.5	-3	1.5
			53.16	-0.25	2	3.5	3.75	1.25	0	-0.25	-4.25	-3.25				53.16	1.25	4	3	3.25	1.5	-1.5	0.75	-2.25	0.5
			53.2	-1.5	-1	2.75	2	1.25	0.75	0.25	-3	-3				53.2	2	2	2.25	1.75	2.5	-2.25	2	1.25	0.25
			53.24	-2.75	-2.5	-2.75	-0.5	-0.5	2.5	1.5	-2.5	-1.25				53.24	1.75	-1.25	-1.25	0.25	1.5	2	4.25	3	0.5
			53.28	-2.25	-1.5	-4.75	-1.75	-1.25	2	-0.25	-1	-0.25				53.28	-1.75	-3	-2	-0.25	1.25	3.25	2.25	4.75	2.25
			53.32	-0.75	0	-1.25	-1.75	0	-1	-0.5	2.25	-0.75				53.32	-2	-2	1.25	-0.5	1.75	2	-0.25	3.25	1.5
			53.36	0.25	0.25	2	-4.5	-0.75	-1.75	-0.25	5.5	-0.25				53.36	0.25	-3	4.25	-4.5	-1.25	0	-0.5	2.5	2.5
			53.4	-0.5	-1.75	0.25	-2.75	0.5	-1.25	-0.25	4	-1.75				53.4	0.5	-3	2.25	-4	0.25	-1.5	0	2	1.25
			53.44	0	-1.75	1	1.5	3	-2	-2.5	-0.25	0.25				53.44	-0.5	-0.75	1.5	-1.75	1.5	-1.25	-1	-2.5	-1
			53.48	3.25	1	2	2.75	4.5	-1.25	-2.25	-3.75	1.25				53.48	1.5	3.25	0.5	1	1.25	0	0	-5	-2.25
			53.52	1.75	2.25	1.25	0	4.5	1.5	1.75	-2.25	2.5				53.52	3	5.25	0.75	1.5	2.25	1	1	-3.25	1
			53.56	0.75	2.75	0.75	-1.75	2.25	1	2.5	0.25	1.5				53.56	4	4.75	2	0.75	1	-0.25	1	1	3.75
			53.6	0.5	1.5	0.25	0.25	-0.25	2	1.75	1	-1				53.6	2.25	0.75	2.25	1	-1.75	0.5	2.25	3	1.25
			53.64	1.25	1.75	0.5	1	-0.25	1.75	1	1.25	-0.75				53.64	-0.5	-1.25	1.5	0.75	-2	-1	2.75	2.5	-1.25
			53.68	2.25	1.75	2.5	1.25	0.5	1.5	0	0.75	0.25				53.68	-1.75	-1	1.25	2.75	-1.75	-0.5	1.25	0.25	0.25
			53.72	1.75	-0.5	1	1	1.25	-1.5	-1	-1	0.25				53.72	-1.25	-0.5	-1	4	-0.5	-0.25	0.75	-0.25	0.25
			53.76	-3	-0.75	-2	2.25	2.5	-1.25	-0.25	-0.5	-0.75				53.76	-2.25	-0.5	-2	3.25	2	0.25	-0.5	-1.5	-1.75
			53.8	-3	1	-3	1.5	3.75	-0.25	1.5	0	-1.75				53.8	-0.75	1.5	-2.25	-1	4	1.5	-1.75	-2.5	-2
			53.84	2	-1.5	-1.25	0.75	4	1.5	2.25	1	-2				53.84	3	1	0.25	-0.25	3	3.5	-3.75	-0.25	-2
			53.88	2.5	-2.75	-0.25	2.25	1.25	0.75	1.5	1.5	-1.25				53.88	3.25	0.5	1.25	2.5	2	2.25	-3	3	0.25
			53.92	0	-1.5	-0.5	3.75	-0.5	0.5	0	-0.75	-0.25				53.92	3.75	2.5	1.25	3	0.5	1	-1.25	3.5	0
			53.96	3	3.25	0.5	3.5	-2.5	1	2	-1	-1.5				53.96	2	4.5	3.5	1.25	1	0.5	0.75	0.25	-1.25
			54	3	5.25	1.5	1.25	-3.25	-0.25	1.5	0.25	-1.5				54	-0.5	4.5	2.5	0.5	0	-0.75	1	0.25	-1.25
			54.04	0.75	2.75	3	0	-1.25	2	-1	0.75	3.25				54.04	-0.5	2.5	-3	1.5	1.5	-1.75	-2	1	1.5
			54.08	-1.5	1.75	4	-1.5	-1.25	5	-0.5	0.5	1.75				54.08	1	1.25	-3.5	-1.25	0.5	1.75	-1.25	-1	1.25
			54.12	1.25	1	2.5	-1.25	2.75	3.25	2	1.5	1.5				54.12	3	0.75	-1	0.5	1	4	2.75	-0.5	1.75
			54.16	2.5	1.75	3.75	-1	3.5	1.75	4.25	0.75	3.25				54.16	1.25	1.25	2.25	1.75	2.25	2.75	4.5	-0.75	3.5
			54.2	0.75	0.5	1.25	1.5	1.25	0.5	0.25	1.5	3				54.2	0.5	-0.75	1	0	1	3.25	2.75	1.5	1.25
			54.24	1	0.25	-1.5	2.5	2.5	-1.5	0	2.5	-0.5				54.24	2	-1	1	0.75	-0.75	2.5	3.25	2.25	0.25
			54.28	2.5	3.5	-3.25	3	2.75	-0.75	1.25	0	-2.5				54.28	2.75	2	1.25	3.5	1	4.25	1	2	0.25
			54.32	3	4.75	-1.75	2	0.75	-0.75	1.75	-0.75	-4				54.32	0.75	3.75	3	2.5	3.5	2.75	0.25	1.75	1
			54.36	3.5	5	4	0.25	0.25	-1.75	2.75	-0.25	-1.5				54.36	-0.25	2	4.75	1.5	3.25	0.25	3	1.5	0.25
			54.4	3.25	2.25	2.25	0.25	3.75	-1.25	2	0	6				54.4	0.25	-1	3	-0.5	3.5	-0.5	3.25	1.75	1.75
			54.44	1.5	-0.5	-0.75	2.5	4.25	-0.5	0.25	1.5	6.75				54.44	0.5	-2.25	0.75	-1	3.25	-1.25	1.75	3.5	1.75
			54.48	-2	-0.75	0.25	4	2.5	1.25	-1.25	4.25	3.75				54.48	1.75	-1.25	0.75	1.25	1.5	-1.5	0.75	3.25	0.75
			54.52	-0.5	1.25	2	3.75	-0.5	4	-1.5	3.25	0.5				54.52	3	0.25	1.25	1.5	0.75	1	1.5	1.25	0.5
			54.56	0.5	1.5	1.25	1.25	-1.25	4.75	-0.5	0.25	-0.25				54.56	3.25	2.25	1.75	0	0	2.75	2.75	1.25	0.25
			54.6	-1	0	1	-1	0	2	0	1.25	0.75				54.6	0.75	3	3.5	0.75	1	1.5	-1	2.5	1.25
			54.64	-2.75	3.25	1	-0.25	2	0	-1.5	3.75	0				54.64	-1	3.25	-0.5	3.25	1.75	1.5	-1.25	5	1.25
			54.68	-2	3	1.5	0	1.75	-2.5	-2.25	2.5	0				54.68	0	2.25	-3	2	-1	-1	-0.5	4.25	0.75
			54.72	1	1.25	1.25	-0.5	1.25	-3.5	-1.5	0.75	1.75				54.72	2	1.25	-1	1.5	-0.25	-5	-2.5	2.5	3.5
			54.76	1.75	1	1.25	0.75	1.5	-4.5	1.25	-1.25	3.5				54.76	2	-0.75	2	1.5	2.25	-6.5	-2.75	0.75	4.25
			54.8	-0.25	-1	0.75	0.75	0.75	-1.75	2	-1.25	3.5				54.8	-1	0.75	1.5	1.5	2	-1	0.25	-1.25	3.75
			54.84	-1	-3.5	0	0	0.25	0.5	3.5	0.75	0.25				54.84	-3.5	0.5	1.25	2.75	0.5	3.25	1.75	-0.25	3.25
			54.88	0.5	0.5	-1.25	2.25	1.25	1.25	4.75	2	-1.25				54.88	-1.25	1	0.75	4	2.5	3.75	1.5	3.75	2.5
			54.92	2.25	3.5	-2.75	0.75	0.75	0.5	3.25	-0.75	-1.75				54.92	2.75	2.75	-1	2.25	1.75	2	2	2.75	0.25
			54.96	0.5	1.25	-1.25	-0.75	-0.25	1.5	1.5	0.25	0.25				54.96	3.75	1	-1.5	0	-1.5	2	1.75	0	2.25
			55	-1	-1.25	-0.75	-1	-1	1.75	2.75	1.75	3.25				55	1.5	-0.5	-0.5	-1.25	-2.5	4.5	3	-1.25	3
			55.04	0.25	0.75	-2.25	0	2	3	4	1	4				55.04	1	1.25	0.5	0.75	1.5	3.5	4.5	-0.25	2
			55.08	1	2.75	0.75	0.25	2.5	2.75	1.75	1	1.25				55.08	0	3.75	3.25	0.25	3	0.25	4	2	1.5
			55.12	2.75	3.5	0.75	0	3	1	-2.25	0	-1.75				55.12	-0.75	3.75	4	0.5	3.5	0	0.25	3	2.5
			55.16	5.75	3	3	0.5	1.5	-0.25	0	1.25	-1				55.16	1	3.75	2.75	0.25	2.25	-1.75	0.25	2.75	1.25
			55.2	5.5	2.5	3	0.5	-1	0	1	1.75	2.75				55.2	0.75	4.75	1	-1.25	1.25	-1	-2.25	3	3.25
			55.24	1.5	2.75	1	1.75	0.5	2	0	3.75	4				55.24	1.25	1	0	-1	1	3	-3.75	2.25	3.5
			55.28	0.25	2.75	0	0.25	4.5	3	1.75	1.25	3				55.28	2	1.25	2.25	-0.75	1	2	-1.5	0.25	0
			55.32	-0.25	1	-1.5	0.75	4.25	3.25	2	0	2				55.32	1.5	0.75	3.75	-1.5	-1	2	-0.25	-0.25	-1.5
			55.36	-0.75	0.25	-0.75	2.25	0.5	4.25	2.25	1.25	3.25				55.36	0.25	-0.5	1.5	-2	-0.5	1.25	1.5	1.25	0
			55.4	-1.25	1.25	0.5	3.25	1.75	2.25	0.25	0.75	4.25				55.4	-2.75	0.5	1	1	1.25	0.75	1	0	1.5
			55.44	-1.75	0.25	-1	1.25	3.5	0.5	0.5	0.25	2.5				55.44	-3.25	0.25	0.75	2.25	1.75	3.5	1.5	0	1.75
			55.48	1	0.25	-1.25	0.25	4.75	1.5	0.25	0.5	-2.5				55.48	0	-0.5	0.25	2.25	3.5	3.75	1.5	1	-1
			55.52	2.5	-0.75	0.5	1	1.5	1.5	-0.5	3	-2				55.52	2.25	-0.75	-2.5	2.5	2	0.5	-0.25	2.5	-0.75
			55.56	2	0.25	1.25	3.75	-1.25	0.5	1.75	3	0.75				55.56	3.25	2.25	-2.5	3	0.75	2	0.25	-0.25	2.25
			55.6	3	-0.25	1.5	4	-1.5	-0.25	1	1.75	3				55.6	1.25	2.25	-1.25	1	-1	2	0.25	-0.75	1.75
			55.64	0.5	0	1.25	-0.75	-0.75	2	-1.25	1.75	2.75				55.64	-1.75	-2.5	0.25	-1.5	-3.5	1.5	-0.25	-1.25	0.5
			55.68	-2.25	1.25	0.25	-2	0	1.5	-1.75	1	3.25				55.68	-1.75	-1.5	1.5	-2.5	-2	-2	0.5	-1.75	2.25
			55.72	-2	-0.25	2	1.5	-0.75	2.25	1	0	1.75				55.72	-1.25	-1.25	3.5	-1.25	-2	0	-0.25	-1	3.75
			55.76	0	-1	2.75	3.5	0.75	2.5	0	-0.75	-1.5				55.76	2.75	-2	3.75	2.25	0.5	2.25	-2.5	0.5	1.75
			55.8	1.75	1.25	1.25	1	2	1.25	0.25	-1.75	-2				55.8	4.75	0.5	2	3.5	0	2	-2.75	-0.75	0.75
			55.84	3.5	2.75	3.25	0.75	1.25	1.25	1.25	-2.5	-3.5				55.84	4	2.75	3.25	3.5	1.75	0.25	0	0.75	-2.5
			55.88	4.25	4.5	4.75	-0.25	-0.75	1.25	-0.25	-1.5	-2				55.88	1	3.5	2.25	2	0.75	-1	0.75	0.5	-2.5
			55.92	0.5	1.75	0.75	1.5	-2.25	-1.5	-0.75	0.5	0.5				55.92	-3.75	1.75	-1.5	3.25	-1.5	-1.5	1	0.5	0.5
			55.96	-3.25	-1.25	-3.25	3.5	-1.75	-2.5	2	2	3				55.96	-5	-2.75	-2.75	3.5	-1.75	-0.75	4	-1	3.5
			56	-2	-1	-2.25	2.25	5.25	-1.75	4	0.5	1				56	-5	-2.25	-1	1	2.25	-1.5	5	-1.75	2.25
			56.04	0	3	2.25	0.25	5.75	2.75	3.25	-0.25	0.5				56.04	-2.25	2	0.75	0	1.5	0	3.75	0	3
			56.08	0.75	4	3.25	0	2	4.25	1	-0.25	3				56.08	-2	2.5	1.5	0	1.25	1	1.25	3	2.25
			56.12	1.25	2.5	0.5	-0.5	0.5	1.75	2.25	2.25	2.25				56.12	-2.25	2.5	1	-1.75	-0.75	1	0.75	3.75	-1.25
			56.16	2	0.25	-0.75	-0.5	0.5	0	2.75	0.75	-0.5				56.16	0	3.75	0.75	-1	-0.5	1.5	-2.5	2	-1.75
			56.2	2	-2	0	-1.5	0.25	-1	0.75	-1.5	0				56.2	4	2.25	1.25	-1.25	1	1.75	-3.75	-0.5	1
			56.24	2	-2.75	-0.5	-0.5	-0.25	-0.5	-1	-1	1				56.24	5.5	-0.25	0	-1.5	-0.5	-0.25	-2	-0.5	2.75
			56.28	1.75	-0.75	-0.75	0.25	-0.5	2	0.5	1	0.75				56.28	1.25	-0.75	-0.75	-1.25	-0.5	0.75	1	-0.5	2.5
			56.32	2.25	1.75	0.75	1.75	2.75	4.25	2.25	4.5	0				56.32	-0.5	-1.25	-0.75	2.25	1.25	2.75	0.5	1	1.75
			56.36	1.75	1.25	2.5	2.25	1.5	3.25	-0.25	5.5	-1				56.36	0.25	-1.75	0.75	2.5	0	1.5	-1.75	-0.25	0
			56.4	0.25	0.75	2.25	1.25	-0.5	2.25	-1.5	4.5	-1				56.4	1.5	-1	0.75	-0.75	-1.5	-0.25	-0.75	0.5	-0.25
			56.44	-2.25	1.75	1	0.75	-0.75	0.5	0.5	3.25	-0.5				56.44	0.75	-0.5	1	-1.25	-3	-0.25	1.5	4.25	0
			56.48	-1.25	3	1.75	1	-0.25	0.5	1.75	1.75	1.25				56.48	0.75	-1.25	1.5	0.5	-2.75	1	3.25	5.75	1.5
			56.52	-0.75	2.75	1.25	-0.5	0.5	-1	2.25	1.75	1				56.52	0.25	0	3.75	2.75	-2.25	1.25	1.75	4.75	0.25
			56.56	-1.75	2.5	0.25	0.5	2.75	-0.5	1.25	1.5	-0.25				56.56	0.75	2.75	2.75	1.25	1	0.75	0	0.25	0
			56.6	-1.25	3.25	1.25	2.75	1.5	2.25	-0.75	0.25	3				56.6	-0.5	3.75	3.75	-0.75	0.5	3	-1.25	-1.25	0
			56.64	0	1.75	1.5	1.5	-1	4.25	-0.75	1	5				56.64	0	1.25	2.25	-0.5	-1.75	3.75	-3	1.5	2.25
			56.68	0.5	-3	1.75	0.25	1	1	-1.5	0	6				56.68	3.25	-1.75	0.5	0	-0.25	-1	-3.5	1.5	4
			56.72	0.5	-1.5	3	1.25	3.5	-2	-2	0.25	2.25				56.72	2.5	0.25	-1	0.75	3	-4.75	0	1.5	0.75
			56.76	1.25	1	3.25	0.25	3.75	0	0	1	0.25				56.76	-1	1.5	-0.5	0.75	3.25	-1.5	0.5	0.75	-2.75
			56.8	2	1.25	4.75	-0.75	2.75	1.75	1.75	1	2				56.8	-0.75	0.75	0	0.25	2.75	-0.75	-2	-0.25	0
			56.84	2.25	1.75	2.75	-1.25	3.5	1	0	-0.25	1.75				56.84	0.25	-0.75	-1.75	0	6	-0.5	-3	1.5	0.5
			56.88	0.75	0.25	-1.75	0	2	-0.25	-3.5	-1.75	-0.75				56.88	-0.25	-0.75	-4	-1.75	4.25	1	-3.25	0.5	-1.5
			56.92	-0.75	-3.75	-1	1	-1.25	-3.75	-0.5	-2.75	-3				56.92	0.75	-3.5	-1.25	-1	1.25	-1	-2.25	-4.25	-2
			56.96	-2.25	-5.25	3.75	2	-0.25	-3	2.5	0.25	-2				56.96	-0.25	-4.5	4	2.75	1	-3.25	0.5	-4.25	-0.5
			57	-4.25	-3.25	3.25	0.5	-2	1.75	1.5	1.5	-1.25				57	-2.5	-3.25	2.75	0.75	-0.25	-1.75	4.5	1	0.75
			57.04	-3	-1.25	1.5	-0.25	-3.75	5	0.5	0	-1.25				57.04	-2	-2	-1.25	-1.25	-1.5	1	6.5	1	0.5
			57.08	-3	0.75	-0.75	1.25	-2	3	2.25	0	-0.5				57.08	-5	0	-3	2.5	-2.25	0.75	5.25	0.25	0.25
			57.12	-1.25	1.5	-1.25	1.5	-3.25	0.5	1.75	0.25	-0.75				57.12	-4.75	-0.25	-0.75	2.75	-3.5	0	2	-0.25	-0.25
			57.16	0.5	1.75	-2.5	-0.25	-2.5	-1.75	2.5	-0.75	-1.75				57.16	-2	-1.25	2	-1.5	-3.75	0	-0.75	-2.75	-1.5
			57.2	4.25	1.25	-1	-1.75	0.75	-2	0.25	-1	-2				57.2	1.5	-3.25	4	-5.75	1.5	0.5	-1	-3.5	-2.5
			57.24	4	2.5	1.5	-2	1.75	0	-2	-1.5	-2.25				57.24	3.25	-0.25	3.25	-3.75	2.75	0.25	-2.5	-2	-2.25
			57.28	2	2.75	2.25	-1.25	3.5	-1.5	-1.25	0	-0.25				57.28	3	1	1.5	-2.5	5.5	-0.75	-2.5	0.5	-4.25
			57.32	1	-0.25	1.5	0	5.5	-1.25	1.25	1	1.25				57.32	0	0	0	-1.25	4.25	1.75	-1.75	0.5	-6
			57.36	1	-1	0	-0.75	2.5	2.5	4.25	1.75	1.75				57.36	-1.25	2.25	-1.75	1	1.25	3.25	-2	2.75	-2.5
			57.4	-0.75	-1.75	0.25	0.5	-0.75	3.75	2	1.5	2.75				57.4	0.25	2.75	-2.25	1.25	-1	3.25	-1.75	3.75	1.75
			57.44	-0.25	-3.75	0.25	3.5	-0.5	1.75	1.5	-1.25	1.75				57.44	2	-1.25	0	0.5	-1.5	0.5	1	-0.5	2
			57.48	-1	-2	1.5	3.25	1	-1	1.5	-3.25	2				57.48	0	0.5	1.75	-2	-2	-2.75	2.5	-3.75	-1.5
			57.52	-1.5	0	-0.75	2	0.5	-1.25	0.75	-3.25	0.75				57.52	-2	1.25	-1.5	-1.75	-3.5	-1.25	1.5	-5.5	-3.5
			57.56	-2.25	0.5	-1.25	1	1	0.75	1.25	-2.75	2				57.56	-0.5	0.75	-1	0.25	-3.25	-1	1.5	-5.25	-0.25
			57.6	-2	2	1.25	1	0.75	1.25	2	-2.25	0				57.6	2.25	0.75	1	-0.25	-0.25	-2.5	1.75	-2	0.75
			57.64	-1.25	3.5	0.75	1.25	1.25	0.75	0	1.5	-2				57.64	1.5	-0.25	-1	-0.75	-0.25	-2.75	0.25	0.75	-0.5
			57.68	-0.5	2.5	-0.5	0.5	1.25	0.25	-2.5	0.5	0.25				57.68	-1.25	0.25	-2.5	-0.75	-0.75	-2.25	-1.5	-0.75	2.25
			57.72	1.75	2.5	-2	-1	1.5	-1.25	-4.25	-2	0.25				57.72	1.25	0.75	-1	-2	-0.25	-2	-3.5	-3.25	1.75
			57.76	1	0.5	-1.5	-1	-1.75	-2	0	-0.25	2				57.76	-0.75	-1	-0.25	-1	-1.75	-1.25	-0.75	-1	1
			57.8	0	-3.25	-0.25	-0.25	-1.75	-2.75	2.75	0.25	3.5				57.8	-1.5	-2.75	0.75	1.25	-0.75	-2.75	2	-0.25	1
			57.84	-0.25	-4	-0.75	-1.5	1	-1.25	2.25	-1	2				57.84	1.5	-1.5	0.75	2.75	0.5	-2.25	1.25	0.25	0.75
			57.88	0.75	-2.25	1	-1.5	5.25	2.25	3	-0.5	-0.75				57.88	0.5	-0.75	0.5	1.75	2.25	0.5	1.75	2.25	-2.5
			57.92	2	0	5.75	-0.75	4.25	3.5	0.75	0.25	-2.75				57.92	-2.25	0.5	1	-2.5	3	2	0.5	2.75	-6
			57.96	1.75	0	7.25	1	3.75	1.5	-1.5	1	-0.25				57.96	-3	-0.25	1.5	-2.25	2.25	1.5	-1.5	0.25	-4.75
			58	-0.75	1.5	1.75	2.5	2.25	2.25	-4.25	0.5	0.25				58	-2.75	0.25	-0.5	0.25	-1.5	0.25	-1.5	-2	-2.25
			58.04	-1.25	3	-1.5	1.5	-0.75	3	-3.5	0	0				58.04	-3	-0.25	-1	1	-3.25	0.5	-0.5	-1	-1.25
			58.08	-0.75	2.75	0.25	0.25	0.75	1.75	-1.25	2.25	-1.5				58.08	-1.75	-1.5	-0.75	-2.5	-1.5	0.5	-0.5	1.5	0.25
			58.12	1.25	-1	0.25	-1.25	0.25	0	-0.25	1.25	2.25				58.12	-1	-1.5	-1.5	-5	-2.75	0.75	0.5	0.75	2.25
			58.16	0.75	-2.25	0.75	-2.25	-3	-1.5	-1.25	0.5	4.5				58.16	-2.25	0	-2.25	-4.75	-6	-0.25	-1	0.25	0.75
			58.2	1	-2.75	0.75	0.5	-4.25	-1.5	-2.25	2.25	2.75				58.2	-1.75	-1.5	-1.5	-2.75	-5.5	-2.5	-2.75	1	-0.25
			58.24	2.25	-2	-1.75	4.25	-1.25	0.25	-1.5	1.75	2				58.24	-1.75	-3	-4	0.75	-0.25	-2.25	-1	1	-1.25
			58.28	3.75	-3	-0.75	3.75	-0.75	2.75	0.75	0.75	1.5				58.28	0.25	-3.75	-3.75	4.25	0.5	0.75	0.25	-2.25	-1.25
			58.32	1	-0.5	1.25	2.75	1	2.5	1.25	2.5	-1.5				58.32	-0.25	-2.75	0	2.75	-0.75	2.25	0.5	-3	-1.25
			58.36	1.25	2	0	3	1.25	-1.5	0.25	1	-2.75				58.36	0.25	-2.75	0.75	-1	-2	-0.5	2	-1	-1.5
			58.4	2.25	3.75	-0.75	2.5	1.25	-0.5	0.25	-0.75	-0.25				58.4	-0.75	-0.25	-2	-3.25	-1.5	-0.75	0.75	1	2
			58.44	2.75	2.25	1.75	0.5	2.5	2	0.5	-0.5	4				58.44	-2.5	-1.25	-1.25	-2.25	0.25	-1	-1	0.25	2.5
			58.48	1.5	-0.75	4	-1.75	2.25	1.75	0.5	4.75	5				58.48	-3.25	-4.5	0	-5.5	-0.75	1	-0.75	2.25	2.75
			58.52	-0.5	2.5	4.75	-1.25	0.25	1.75	-3	5	2.5				58.52	-3.75	-0.5	0	-4.25	-2	1.5	-2	1.75	2
			58.56	-1.5	3.5	3.5	0.25	-0.75	1.75	-3	2.75	-0.5				58.56	-4	3	0.25	-4	-3	-0.5	0	1.25	0
			58.6	1.5	2.5	2.5	-0.25	3	1.75	2	0	-0.25				58.6	-1.25	0	2.75	-4	0.75	-4.25	0.25	1.5	-3
			58.64	3.5	0.5	0.25	1.5	4.5	3.75	5.25	0.25	-0.25				58.64	-1.25	-2.25	-0.75	0	2.5	-1	-0.5	2	-3.5
			58.68	3.25	3	2	1.75	2	4.5	6	0.75	0.75				58.68	-0.75	0	-3	1.5	-0.5	1.5	-1.25	1.5	-1.5
			58.72	1	3.25	3	3	0	2.25	5	1.25	2.75				58.72	-1.5	2.25	-2	2.25	-2	-0.25	0.75	1.25	1.5
			58.76	0.5	0.25	-0.75	4.25	-0.75	-0.25	4	0.25	3.5				58.76	-3	-0.75	-1.25	1.25	-2.25	-3	1.5	-1.5	1.75
			58.8	1.25	1.5	-4.25	3.5	-0.5	-1.75	2.25	-2	3				58.8	-0.25	-1.25	-4.25	-1.75	-2	-4	0.5	-5	1.5
			58.84	2	2.5	-2.25	-0.25	-0.75	0	-1	-5.75	1.5				58.84	4	0.75	-4	-4	-0.25	-3	-1	-7.75	0.5
			58.88	1.5	2.5	0.5	-0.25	-0.75	2.75	-2	-0.25	0.75				58.88	4	2	0	-4	-1	-1	-2.25	-4.75	-0.5
			58.92	1.25	2	-0.5	0.75	2.25	2.5	1	5.75	1.75				58.92	1	1	1	-1.75	-2	0.25	-3	0.25	-1.75
			58.96	1.75	2.75	0.5	0.75	4.25	1.5	2	4.75	-0.5				58.96	-1.5	3.5	-0.5	-0.25	-3.5	0.5	-5.5	1.5	-4
			59	1.75	3.25	3.75	1.5	2	2.5	2.25	3.5	-1				59	-2	3.25	3.25	0	-2	-0.75	-4.5	0.75	-3.75
			59.04	-0.25	-2.25	5.5	4.25	0.5	4	2	2.25	-0.75				59.04	-2	-1.75	2.75	2.25	0	1	-2.75	-1	-4.25
			59.08	-0.75	-2	4.5	4.5	0.75	3.75	1	0	0				59.08	-0.5	-2.75	0.75	2.25	1	1.25	-1	-2.25	-4.25
			59.12	0.75	3.5	2.5	2.75	1	2.25	-0.75	-0.75	1.25				59.12	-0.5	-1	1.25	0.75	-1	1.5	-0.25	0.25	-1.5
			59.16	-1	3	1.5	1	1	1.75	0.5	1	1.5				59.16	-2	-1	1.75	-1.5	-3	1.5	0.25	1	-1.5
			59.2	0.5	4.25	1.5	1	3.25	-1	1	0.25	-0.5				59.2	-0.25	-0.5	-1.75	-2.75	-1.75	-0.5	1.75	-0.75	0.25
			59.24	2.75	1.5	-1.5	2	2	-2.75	3.75	-1	-1.75				59.24	0.75	-1.25	-5.25	-1.5	-1.5	-2.5	2.25	-2.5	0.75
			59.28	3.5	-3	-1.75	1	-2.25	-2.75	3.75	-3.25	-0.25				59.28	0	-4.5	-3	-0.75	-4.25	-1	1.75	-2.75	1.25
			59.32	2.75	-3.75	-0.25	-0.75	-1.5	1.25	0.75	-4.5	-1				59.32	0	-4.5	-3.25	-0.25	-2.75	3	-0.5	-2.75	-2.25
			59.36	1.75	-2.75	1.25	-0.75	2.25	4.75	-2.5	-1.5	-1.5				59.36	-1	-3	-3	0.25	1.5	5	-1.5	-1.5	-3.5
			59.4	0	-1	2.25	-0.75	2.5	2.75	0	0.5	-1.75				59.4	-1.5	-2.25	-1.5	-0.25	1.25	2.5	0.25	-0.25	-3.75
			59.44	1	0.5	0.75	-1.25	-1.25	1.5	1.75	2	-1.5				59.44	0.75	-2	-1	-4.25	-3	0	-1.25	1.5	-4.25
			59.48	1	1	-0.5	-2.25	-1.5	1.5	1	3.25	0.75				59.48	-0.25	-2	-1.25	-5.5	-3.5	-1.75	-0.25	1.5	-1
			59.52	-0.75	1.75	-1.75	-1.5	-1.5	-2.25	0.75	2.75	2.5				59.52	-4	-0.25	-0.75	-2.25	-0.5	-2	1.25	-0.25	0.75
			59.56	-0.25	1.25	-3.5	0.75	1.25	-4	2	0	2				59.56	-4	-1	-1	0.25	0.75	-2	0.5	-2.75	0.5
			59.6	2	1.5	-4.5	0.25	3	-0.75	2.75	-1.5	-1				59.6	-0.5	-2.5	-2.5	-0.25	0.5	-1.75	1.75	-3.25	-1.75
			59.64	2.5	1.5	-3.5	-1	0.75	-0.25	0.75	-0.75	-1				59.64	-1.25	-1.25	-4.5	0	-1	-1.75	2.5	-2.5	-1
			59.68	1.75	1	-2.25	-0.25	0.5	0.5	1	0.25	4.5				59.68	0	0	-6	1.75	-1.25	-2.75	1.5	-0.5	3
			59.72	-1.25	-2.5	0	1.5	2.5	-1	1.75	2.25	3.5				59.72	-0.5	-1.5	-3.75	0.75	-0.75	-4.75	-0.25	0	3.25
			59.76	-2	-0.25	1	0.75	4	-3	1	4.75	-0.75				59.76	-1	-1	0.25	0.25	0.5	-3.25	-3	-0.5	0.5
			59.8	-0.25	3.25	0.75	2.5	2.5	-1.25	0.5	3.75	1				59.8	-0.75	2	0.75	1.5	0	-1.75	-2.75	-0.5	2.25
			59.84	1	4.5	1.5	3.25	2	0	-0.25	0.5	2.25				59.84	-1.75	2.75	1.5	1.25	2.5	-1.75	-2.25	-0.25	2.25
			59.88	-0.75	3.75	3	4	-0.75	2	0.25	-1.25	1.75				59.88	-5	1.75	2.25	-0.75	1.75	0	-1.5	-1	-0.75
			59.92	-2.25	2	3.5	2.5	-1	3	2	-0.5	1.25				59.92	-3.5	0	1.5	-2.25	-2	0.75	-1	-1.25	-1.5
			59.96	-1.25	1.75	1.25	2.5	-0.5	1	0.5	2	1.5				59.96	0.5	-1.5	-1.25	0.25	0	0	-2	-1.5	-2.25
			60	-0.5	0.25	0.25	4	-0.5	0.25	1.5	0	1.5				60	0.25	-3.75	-2	0.75	1.5	-1.25	-1	-1	-0.75
			60.04	-0.25	1.25	1.25	3	-1.25	-0.75	0.75	1	0.75				60.04	-2.5	-2	-1.75	-2	0.25	-4	0	-0.25	-1.5
			60.08	-2	0	1	1.5	0.5	0.5	1.25	2.25	-0.25				60.08	-1	-1	1.75	-2	0.75	-2.5	0	-0.25	-2.25
			60.12	-3.25	-0.5	2	-2.25	0	2.75	1	2	-1.5				60.12	0.25	0.75	2	-2	0.75	-0.25	0.5	-0.75	-2
			60.16	-0.5	-1.5	-0.25	-0.75	-0.5	5.75	-2	4.5	0.5				60.16	2.5	-0.25	-1	1.75	-0.5	-0.25	-0.75	1.5	-1.5
			60.2	4.25	-1	-0.25	1.75	-1.25	6	-0.5	3.75	0.75				60.2	2	-3.25	-3.5	3.5	-1.75	0.75	-0.75	1.75	0
			60.24	5	4.25	1.75	1.25	1.25	2.5	3.5	0.75	-0.75				60.24	0.25	-0.25	-2.5	-0.25	1	2	-0.75	1.75	0
			60.28	3	5	0.75	-1	5.25	0.75	1.5	-2.75	-3.25				60.28	0.75	1.75	-2.75	-2.25	4.75	-0.25	-2.25	-4	-3.75
			60.32	0.75	1	-1.75	-2.25	3.25	-0.5	-3	-3	-3				60.32	-2	-0.5	-2.25	-1.5	1.75	-2	-1.75	-5	-4.5
			60.36	-0.75	-1.5	0.25	-1	0.25	-1.5	-1	-2.25	1.75				60.36	-3	-1.75	1.5	-1.25	-2.25	-1	2	-1	-1.25
			60.4	0.5	-4	1.25	1.75	1.5	-0.5	1.25	1.25	2.5				60.4	-2	-4	1.25	-0.5	-3.5	-1.5	1.25	2	-1.5
			60.44	1.25	-1.5	0.5	2.5	2.25	-1.25	3.5	2.25	0				60.44	0	-3.25	0.5	0.75	-3	-5.25	1.75	2	-2.75
			60.48	0.75	0	2.25	0	-0.75	0	4.25	2	-0.75				60.48	0.5	-1	2	-0.5	-2	-3	3	2.25	-0.75
			60.52	-0.25	-2.5	4.75	-2.75	-0.5	1	1.5	0.5	-1				60.52	0	-2.75	0.5	-3.75	-2.5	1	0.25	-2	1.25
			60.56	-1.25	-3	4	-1	2.75	2.5	-1	-1	-1.75				60.56	1	-3.5	-0.5	-3.5	-1.75	2.25	-1	-2.75	-0.5
			60.6	0.25	2	0.5	-0.25	2.25	1.25	-2.5	-1.5	-1.5				60.6	0	-1.25	-2.25	-4.75	-1.5	-0.25	-1.75	-4.5	-1.25
			60.64	-1	4.5	-2	1.5	-1.5	1.25	-2.5	-2.5	0.25				60.64	-2.25	0.75	-3.25	-1.25	-2	-0.75	-2.25	-4.75	-0.25
			60.68	-1	3.75	-3.75	3	-2.75	1.75	-0.5	-3.25	2.75				60.68	-2.25	1.5	-3.25	0.75	-2.25	2	-1	-4.5	0.5
			60.72	0.25	-0.25	-2.75	2.5	-3	0.75	4.5	1	0				60.72	-1.75	-0.5	-2.5	-1.75	-3.75	0.5	1.75	-1.75	1.75
			60.76	-1.5	-1	-0.75	0	0	-1.5	6.25	1	-0.25				60.76	-5.25	0.75	-1.25	-1.5	-1	-1.75	3.75	0	2
			60.8	0	0	0.5	-0.25	2.25	-1.25	4.75	-1.75	0.75				60.8	-5.5	1.25	-2.5	1.25	2.5	-1.25	2	-0.25	0
			60.84	2	-1.25	-0.25	1.25	1.25	-0.25	2.5	-1.25	0.75				60.84	-1.25	0.25	-3.25	1.25	1.75	0.5	-2.5	0.25	-2
			60.88	2	-2	0.25	0.5	-0.75	-0.5	1.5	0.5	0.25				60.88	1	-0.75	-1	0.5	-1.75	0.5	-2.75	0	-4.75
			60.92	1	-1.5	-0.25	-0.5	-0.5	-2	-1.75	-0.5	1.25				60.92	0.75	-0.25	0.25	-0.75	-3.75	-1	-2.75	-0.75	-4.25
			60.96	-0.25	0.75	-1	-0.5	-0.75	-3.5	-1.5	-1.5	2.25				60.96	0.5	0	-1.25	-2.25	-5	-1.5	-0.25	0	-0.75
			61	-2.25	2.75	0	-2.25	-0.5	-1.75	-2.5	-0.75	3				61	-0.25	-1	-2.25	-6.25	-4.25	-1	1.75	1.25	2.5
			61.04	-3.75	0	2	-1.75	1.5	-0.25	-1.5	-1.5	2				61.04	-3.5	-1	-0.5	-3.75	-0.75	-2.75	0.75	0	2.75
			61.08	-0.5	-0.75	1.5	-0.75	0.75	-0.75	-0.25	-0.25	0.25				61.08	-2.75	0.25	1.25	-1	2	-1.75	0.25	0.5	1
			61.12	1	-0.5	2.5	0.75	0	-0.75	0.25	2.25	-0.75				61.12	-2	0	3	1.25	3.5	0.5	0.5	-0.5	0
			61.16	2.5	-2.25	3.5	0.75	-1	1.75	1.5	3.5	0.25				61.16	0.25	-1.5	1.5	2.75	1	1.5	0.75	-0.25	1
			61.2	2.25	-3.5	0.75	-0.5	-0.5	2.5	0	2	0.5				61.2	-1	-2.25	-3.5	-0.25	-2.5	0.25	-0.25	-0.75	1
			61.24	0.75	-2.25	-2	-1.25	1.25	2.25	1.5	0.5	-2				61.24	-2.75	-1	-3.5	-3.5	-2.75	0.25	-0.25	-1.25	-2.25
			61.28	-0.75	-0.25	-3	-2.25	1	0.5	1	0.25	-2.5				61.28	-2	-1.25	-2.5	-4.75	0.5	-0.75	-0.5	0.25	-5.5
			61.32	-1.75	1	-4.25	-3.75	2	-1.25	0	-0.5	-0.25				61.32	-1	-0.5	-2	-3.75	1.5	-3	-0.25	1	-3.5
			61.36	0	3	-4	-1.5	0.25	0.5	-1	-0.25	0.5				61.36	0.5	1.25	-3	-2	-0.5	-2.75	-0.25	1.25	-0.75
			61.4	1.5	1	-0.25	1.5	-1	2.5	-2.5	-2	0				61.4	1.5	-0.75	-2	1	-1.75	-2	-2	-0.75	-0.75
			61.44	0.5	-1	2.5	1.5	-1.25	0.5	1	-2.75	-2.75				61.44	0.75	-2.75	-1	1.75	-3	-1	-0.25	-3.5	-0.25
			61.48	0	0.5	3.25	-3	1.75	-1	3	-2.5	-5.25				61.48	-2.5	-2	-1.5	-2.75	-0.25	0	2	-1.25	-0.5
			61.52	2.25	2.25	3	-5	1.5	0.25	4.25	-1.75	-4.75				61.52	-1	0	-1	-5.75	1.5	-0.5	4	2	-2.75
			61.56	1	1.75	1.75	-2.5	-3	1.25	3	0.75	-1.5				61.56	-1	-0.5	-0.25	-4.5	-1	-2	2.5	3.25	-4
			61.6	-0.5	1.75	-0.75	0.5	-2.5	-0.25	-0.75	1.75	-3				61.6	-0.5	-0.5	0.25	-1.25	-1.25	-2.75	-1.75	3.5	-4.25
			61.64	-0.5	3	-1.25	2.5	-1.5	1	-3	0	-2.25				61.64	0.5	0.5	1	0.5	-0.5	-1.25	-5	0.75	-1.75
			61.68	-1.5	2.5	-2.75	2.25	-1.75	1	-0.25	-1	-1				61.68	-2.75	0.5	-0.25	0.5	-3.25	1.25	-2.75	-1	-0.25
			61.72	-1.5	0	-1.75	2	-1	0	1.25	-2	0.75				61.72	-2.25	-1.5	-1	-0.25	-3.5	1.5	-2	-3.5	-1.25
			61.76	-0.5	-3	1.75	2	-0.25	-2.5	0	-2.5	2.25				61.76	0.25	-2.25	0.5	0.25	-0.75	0.25	-3.75	-3	-1.75
			61.8	0.5	-2.75	2	-0.5	-2	-3	-2.75	-0.5	2				61.8	1.25	-2.25	3.25	1.75	1	0.5	-1.75	0.25	-1.25
			61.84	0	-2	1	-1.5	-3.75	-2.5	-3	0.5	2.25				61.84	-0.25	-1	3.25	-0.5	-1.25	0	0.5	-0.5	2
			61.88	-0.25	-1	0.75	-0.5	-0.5	1.5	-1.25	0.25	1.75				61.88	-0.5	0.25	-0.75	0.75	-2.75	2	-0.25	-1	3.75
			61.92	-0.25	-3	0	-1.75	3.25	2	-1	-2	2.25				61.92	-1	-2.75	-2.5	0.5	1.75	3.25	-1.75	-2	1.25
			61.96	0.25	-3.75	-1.5	-1.5	4.75	-1	-1	0.25	1				61.96	-3.5	-3	-2.75	-1	5.75	3	-1.5	0.25	-0.5
			62	1.5	-2.5	-3	0.5	2	-1.75	-1.25	1.75	-0.5				62	-2.25	-0.5	-2.75	0.5	4	0.5	-2.25	1	-1
			62.04	-1	0	-2.25	0	-2.25	0	-1	1	0				62.04	-0.25	1	-1.5	1	-0.75	-1.25	-2.5	-0.75	-1.25
			62.08	-1.75	2	-0.5	-1	-2.75	2.25	-1	-0.25	-1.75				62.08	2.25	1	-0.5	-2.25	-4.25	-2.75	-2	-2.75	-1.5
			62.12	-1.25	1.75	-1.75	-0.25	0.75	-0.25	-1	-2.75	-3.5				62.12	2	1.75	-0.75	-1.5	-3.25	-7	0	-4.5	1.5
			62.16	-0.25	0.75	-2.25	0.5	1	1	0.5	-5	-0.75				62.16	-1.5	2.25	-2.75	0.25	-0.75	-3.5	-1	-5.25	2
			62.2	-2.5	-2	-2.25	1	-2.5	-0.25	0	-3	0.5				62.2	-5.5	-1	-4.25	-0.5	-0.75	-1.25	-0.25	-3.75	1
			62.24	-3.5	-4.25	-0.25	0	-3	-2.75	-2.5	0.25	-1.25				62.24	-6.5	-1.25	-2.25	-1.75	0.5	-3.5	-0.25	0.25	-1.5
			62.28	-4.5	-3	2	0	1	-3.75	-3.25	0.5	-0.5				62.28	-5	-0.5	3	-2	3.25	-4.75	3	1.5	-1.25
			62.32	-4.5	-3	-0.25	-0.25	3	-2.75	-0.5	-0.75	1.5				62.32	-3.75	-1.25	2.25	-3	1	-1	5.5	1.5	2.5
			62.36	-2.25	-4.5	0.75	0	3	0.75	-0.25	-0.5	2.5				62.36	-2.75	-2.25	1.5	-2	-2	2	3.5	1.75	4.25
			62.4	-2	-2.75	2	-4	1.5	3.25	-2	-0.25	0.5				62.4	-0.75	-3.5	0.5	-2	-1.5	0	0.75	0.5	3
			62.44	-2.5	2	1.5	-3	-0.5	2	-2.5	-1.5	-1				62.44	-0.5	-3.25	1.75	-2	-1.5	-1	-1.75	-2	-0.5
			62.48	-4.75	-0.25	-1.75	-2.25	-3.75	-0.5	-0.25	-1.75	-0.75				62.48	-0.5	-4	1.5	-2	-3	-1.75	-2	-3.25	-3
			62.52	-2	-1.75	-4.5	-1.75	-6.75	-2.25	1.5	-2.5	-2.75				62.52	-0.5	-2.25	-2.5	-2.5	-3.5	-4	-2.25	-3.5	-3
			62.56	0.75	-1.75	-3	-0.75	-4	1.5	0.5	-1.25	-3.25				62.56	1	-0.25	-3.25	-2	-1	-2.25	-4	-0.25	-2
			62.6	2	-0.25	-0.5	1	-1.75	0.75	-0.5	0.75	-1.25				62.6	1.75	0.25	-0.5	0	0	1	-3.5	1.5	-2
			62.64	-1.75	-1.75	1.75	3.75	-4.5	-0.75	0.25	0	-1.5				62.64	0.75	-1	0	2	-3.25	4.25	-2.5	0.75	-3
			62.68	-4	-0.75	0.25	2.75	-3.75	-1	-0.25	0.5	-1.75				62.68	-1.5	-1	-2.25	0.5	-5	4.75	-2.5	0.75	-1.5
			62.72	-3.25	0.25	-0.75	1	-1	-1.25	0	-2.5	-1.25				62.72	-0.5	-0.75	-1	-1	-1.75	0.5	1.25	-2.5	-0.75
			62.76	-2.75	-1	-1.25	-3.75	1	-1	-2.5	-2.5	-1.75				62.76	-0.5	0.75	2.75	-1.75	1.25	-3.75	-0.25	-2	-0.5
			62.8	-1.5	-1	-1	-4.25	0.25	-1.75	-1.75	-1.25	-2.25				62.8	1	-1	2.25	-2.5	-1.5	-4.75	-3.25	-2.25	-1
			62.84	2.25	-1.25	-1.25	-0.75	0.5	-3.5	-1.75	0.25	-1.25				62.84	2	-1.5	-1	-0.75	-3	-5	-3.5	-0.75	0.25
			62.88	1.75	-2	-0.5	2.5	0.5	-3.25	0.25	1.75	-1				62.88	0.75	-0.75	-0.25	0.75	-4.5	-3	-1.5	-0.25	0.5
			62.92	-1	-1	-1.25	3	-1.5	-4.75	-0.5	-0.75	-0.25				62.92	-3	0.75	-0.5	1.25	-3.75	-1.25	0.25	-3.25	0
			62.96	-0.75	0.25	1.25	0.75	-1	-2.75	-2	-0.75	-0.75				62.96	-5.25	2.5	0.25	1	-1.75	1.25	0.5	-3.25	1
			63	0.5	-1.5	1.25	-2.25	-1	-1.25	-3	-0.5	-1				63	-4.25	0.25	0.75	-0.75	-2.75	2.75	-2.25	-2	-1
			63.04	0.5	-0.75	-1.5	-2	-1.75	-0.5	-4.75	0	-0.5				63.04	-1.75	-2.5	-0.5	0.25	-4	1.25	-4.75	1	-0.75
			63.08	-0.75	0.5	-2.25	-3	-3.25	-2.25	-2.75	-4.25	-1.75				63.08	-0.25	-3.25	-3	-1.75	-4.5	-1.75	-2.5	-1.5	0
			63.12	-0.5	-2.25	-2.5	-2.25	-4.25	-1.25	-1.25	-5.25	-0.5				63.12	-1.5	-3.25	-2.75	-2.5	-4.25	-2	-2	-1.25	0.75
			63.16	-0.25	-3.25	-0.5	-2	-4	0.75	-0.75	-2.5	1.5				63.16	-1	-0.25	-1	-0.75	-2.75	-0.5	-1	0.25	1
			63.2	-3.25	-1.75	0.25	-2.25	-2.75	1.5	-1	-2.75	-0.75				63.2	-2.5	2.75	1.75	-2	-3.25	0	-0.75	-0.75	0.25
			63.24	-5.75	1.75	-1	-3.25	2	-0.5	-1	-2	-0.5				63.24	-3.75	4	1	0.25	0.25	0.5	0	-0.5	0.75
			63.28	-3.5	2.5	-2.75	-0.25	3	-2.75	0.75	-0.25	-1.25				63.28	-2.5	3.25	-2.25	7.25	2.25	-1.25	2	-0.25	-2.5
			63.32	0	2	-1.75	0	-1.5	-2.5	1	0.25	-2.25				63.32	-1.75	1	-3.5	5.75	-0.5	-1.5	4	-1.25	-6
			63.36	2.25	-0.5	0	-1	-0.25	-0.5	0.75	-1.5	-1.5				63.36	-1.25	-2	-3.25	-0.5	0	-1.25	2	-3.75	-3.75
			63.4	1	-1.5	-1.5	0.75	0.5	-1	2	-0.5	0.25				63.4	-0.25	-2.75	-4.25	-2.75	-0.5	-1.25	-0.5	-2.75	-0.5
			63.44	-1.75	-3	0.75	0.25	1.25	0.25	1.75	-1.25	-1				63.44	-0.75	-3.25	-0.25	-1	1	-1.5	-2	-1.75	-0.75
			63.48	-2.5	-3.5	2.25	0	0.5	1	-0.75	-2.25	-2.25				63.48	-3.5	-4.25	0.75	0.75	1	-1.25	-2.75	-0.75	-1.75
			63.52	-1.25	0	1.5	2.25	-2.25	2	-0.75	-1.75	-1.5				63.52	-0.25	-2.25	-2	1.25	0.75	2.25	-1.75	-1.5	-3.5
			63.56	-0.75	-0.5	-0.5	0.25	-2.25	0.25	0.75	-1	1.75				63.56	3	-2	-3.25	-0.25	0.25	1.75	0.25	-1.75	-2
			63.6	-2.75	-3	-2.5	-1.75	-0.25	1.25	0.75	1	2				63.6	0.5	-1.25	-3.25	-1	-1.75	0.75	-0.25	0.25	-1.75
			63.64	-1.5	-3.75	-3.5	-2	0.5	-0.5	2.25	2	1.75				63.64	0	-2.25	-2.5	-2.25	-1.25	-1.25	0.25	2	-0.5
			63.68	-0.75	-2.75	-2	-0.25	2	-2.5	1	-1	-0.75				63.68	0	-1.75	-2.25	-2.5	2.25	-1.25	-2.5	0	1
			63.72	-2.5	0.5	-0.75	-0.5	2.25	-2.5	-1.5	-0.5	-2.25				63.72	-0.75	-0.75	-2.25	-2.75	2.5	-0.25	-4	0	0.25
			63.76	-3.5	-1.5	-0.5	1.5	-1.75	-2.75	-2.75	0	0.5				63.76	-2	-0.5	-0.5	-2	0	-2	-2	-0.5	-0.5
			63.8	-5.5	-1.75	-1.5	0.75	-3.5	-1.75	-1	2.75	-0.75				63.8	-3.25	0.25	1	-2.25	-0.25	-1.75	-0.25	1.75	-1.75
			63.84	-4.25	0	-3.25	-2.25	-0.75	1	-2	1	-0.5				63.84	-4	-0.75	0.25	-5	0	0	1	1.25	-0.75
			63.88	-0.5	-0.75	-0.5	-3.75	0	2	-3	-0.5	0.5				63.88	-1.25	-2	0.75	-5	1.5	0.75	-1.5	0	-1
			63.92	4.25	0.5	1	-3.5	-1.5	0.5	-2.75	-2.75	-0.5				63.92	2.25	-1.75	2	-2.5	-0.75	0.25	-2.25	-1.5	-2.75
			63.96	2.75	-1.5	-0.5	-3	-3.5	-1.25	-2.25	-1.25	-1.5				63.96	1.5	-2.75	0	-1.25	-3.5	0.25	-1	-2	-2
			64	2.75	-1.25	-1.25	-1.25	-3	-2	-2.25	-0.25	-0.25				64	1	-1	-0.5	1.25	-3.25	-0.25	-1.25	-1	-0.75
			64.04	1.5	0.25	-1	-1.25	0	-3.75	-3.5	-1.5	0.75				64.04	-2	3.5	0.75	-2	-0.25	-1.25	-2.25	0.5	0
			64.08	-4.25	1.5	1.5	0.25	2	-2.25	-2	-1.25	1				64.08	-3.75	2.75	3	-3	1	-1.5	-0.25	2.25	2
			64.12	-5.25	0.25	-1	0.75	1.5	-0.25	-0.75	-3.5	-0.75				64.12	-0.75	-1.75	1.5	-2.75	0.5	-1	0.25	-1.25	2.25
			64.16	-4.25	-1.75	-2.25	1	0.75	1.75	0	-4.75	-3.25				64.16	0	-4.5	-3.5	-2.5	0.5	1.75	-0.25	-5.5	2.25
			64.2	-3.75	-2.75	0	-1.5	-1.5	1.75	1.75	-3.5	-2.5				64.2	-3.5	-4.5	-4.5	-3.25	-1.5	3.25	0.25	-3	1.25
			64.24	-1	-3.5	-2	-3	-2.25	-1	1	-0.75	2.25				64.24	-2.5	-3.25	-4.5	-2.25	-2.5	2	0.5	0.75	1
			64.28	1	-3.5	-1.25	2	-2.5	-3.75	-0.75	1.5	4				64.28	-0.25	-2.75	-1.5	1.75	-0.75	-0.25	1.5	-0.25	-1.25
			64.32	0.25	-2.25	3	4.25	-1.75	-3.5	-2.5	-0.75	0.5				64.32	-0.25	-3.5	3	2.5	0.75	-2.5	1	-4	0.25
			64.36	-2.25	0.75	2	1.75	-1.75	-2.25	-3	-2.75	-1.25				64.36	-3.25	-1	5	1.25	0.75	-2.5	-0.25	-1.75	3.5
			64.4	-2.25	1.25	-2	-1.25	-1.5	-3	-0.75	-2.5	-0.25				64.4	-1.75	2.75	0.5	1	-0.25	-2.75	1.5	1.25	3.25
			64.44	-2.25	-0.25	-1.5	-3	0.75	-2	0.5	-1.75	0				64.44	0.5	2	-0.25	1	-1.5	-1	2.25	0.75	-0.25
			64.48	0.25	0	-2	-2.75	1.75	-0.5	-0.25	-2	-0.75				64.48	2.75	-0.25	-0.25	1.5	1.25	1	0.75	-1	-2.75
			64.52	2.5	-2	0.25	-2.5	1.5	2	-0.5	-1.25	-1.5				64.52	2.25	-2.5	2.25	1	3.25	0.75	-1.75	-1.25	-6
			64.56	2.25	-1.75	0.5	-0.75	3.25	2	1.5	0.5	0.5				64.56	0.25	-2	-0.25	-2	3.25	-2.25	0.5	-0.5	-3.5
			64.6	0.5	-3.75	-1	0.25	3.25	-0.5	2	2	1.5				64.6	-2.25	-3.5	-3.75	-3	1.5	-1.5	0.5	1.75	0.5
			64.64	0.25	-2.25	-1	0.5	0.5	-3.25	-1	1	2.25				64.64	-0.75	-1.25	-3.75	-1	0.75	-0.5	-1	2	2.5
			64.68	0.75	1	1	2	1.75	-3.5	-1.75	0.75	-0.75				64.68	2	0.25	0.5	-1.75	2.25	-1.5	-2.75	2.5	-1
			64.72	0.5	3.5	2.75	4	1.25	-1.5	-1	0.25	-2.75				64.72	-0.25	1	2.25	0.25	3.75	-2.75	-4.25	2.5	-2.25
			64.76	-0.25	2.25	-0.75	1.75	0	0.25	-2.25	1.25	-2.5				64.76	-1.75	-1	-1.25	2	2	-1.75	-3.75	3.25	0.75
			64.8	2	0.75	-3	-2.5	1.5	-1.75	-2	1.25	-3				64.8	-0.25	0	-2.75	1	1	-1.25	-2	3.5	-0.5
			64.84	3	-0.5	-2.75	-3.25	0.75	-2	-0.75	1.5	-1				64.84	1	0.25	-0.5	0	-0.75	0	0.75	4.25	-1.75
			64.88	1.5	-0.5	-2	-0.5	-0.25	0	0.25	-0.75	-0.75				64.88	1.25	1.5	-0.75	0.25	-2.25	3	2.25	2.5	0.5
			64.92	-0.5	-1	2.25	1	-1.75	1.5	1.25	-1.75	-1.25				64.92	-1.25	0.75	1.25	2	-3.75	3.5	3.25	-0.5	0
			64.96	-3	0	1.25	0.25	-2.75	-0.25	1	0.25	0.5				64.96	-3	1.25	1.5	1.25	-2.75	0.25	2.75	-1.5	1.5
			65	-4.25	-0.25	-0.75	1.25	-2	-1	0.25	-1.5	0.75				65	-2.25	1.25	-0.25	0.5	-1	-3	0.25	-2.25	1.75
			65.04	-4.75	-2.25	-0.75	1.25	-3	0	-1.5	-1.75	-1.5				65.04	-2	1.75	-1	-0.75	-2.5	0.5	-1.25	-2.75	-0.75
			65.08	-1.5	-2.25	-0.25	-0.75	-3.5	3	-1.75	1.25	-2.25				65.08	-1.25	-0.5	0.25	-0.75	-4	3.75	-1.75	-1.75	-0.75
			65.12	3	-2	-0.5	-2.25	-1	4	-1.5	-1.25	0.5				65.12	0.75	-4	0.75	-0.25	-2.75	3.75	-2.5	-0.5	1.5
			65.16	3.5	-3.25	-1.75	-3.5	-1.25	0.5	-0.25	-2.75	1.75				65.16	1.75	-3.5	-2	0.5	-3	0.25	0.75	-0.5	2.25
			65.2	-0.25	-3.75	-0.75	-3.5	-3.75	-3.25	0.5	-3.5	1.25				65.2	0.5	-1.5	-2.25	-0.25	-3	-1.75	3.75	-0.5	0.75
			65.24	-1.25	-2.5	0.25	-1.25	-3	-6	1	-2.5	3				65.24	-1.25	-1.5	1	-1	-1	-2.25	2.75	1.75	0
			65.28	-1.25	0.5	1.75	-2	-0.75	-3	2	-0.75	1.75				65.28	-1.5	0.25	4.25	0.5	1.25	-0.25	1.25	2.75	1
			65.32	-3.75	1	0	1.25	3	-0.5	0.75	-0.25	-0.25				65.32	-1.75	1.75	4.5	1	2	1	0.75	1.25	3
			65.36	-4.25	0.5	1	1.75	5.25	0.75	-0.25	-0.25	-1.75				65.36	-4.25	1.75	3.25	-1.25	1.5	1	2	-0.25	0.75
			65.4	-3.75	0.25	0	-0.5	3.5	1	-3	0.75	-3.75				65.4	-6	1	-0.25	-0.75	2.5	-0.5	-0.25	-1.5	-4
			65.44	-2.5	0	-2	-1.5	-1.75	0.5	-3.5	-1	-2.5				65.44	-3	0.25	-3.25	0	2.5	-0.75	-1	-1.75	-4
			65.48	-1.25	0.25	-1.5	-2.5	-2	-1.75	-0.25	-1.75	0.5				65.48	-1	2.25	-1	-1.25	2	0.25	-0.75	-1.25	0.75
			65.52	0	-0.75	-1	-1	-1	-1.75	0.75	-1.75	1.5				65.52	1.75	2	0.75	-0.25	0.25	0.75	-3	0	3.25
			65.56	1	-1	-1	1.75	-2.5	-2.5	0.25	-0.25	1				65.56	2.75	0.25	-0.75	3.75	-0.75	-2	-1	1.75	3.5
			65.6	0	-0.5	1	2.75	-3.5	-2.25	-0.5	1.25	-0.75				65.6	1.75	-1.25	0	4.5	-0.75	0	1.5	0	2
			65.64	-2.25	-2	3.25	1	-1	-2	-1.25	4.25	-0.5				65.64	0.75	-1.75	2	0.75	-1.25	1.25	0	3.5	-0.75
			65.68	0.25	-3.5	2.25	-0.25	0.5	-1.5	-1	1.25	-0.5				65.68	2.25	-0.25	3	2	-0.5	0.5	-1	2.75	-1.25
			65.72	0.75	-4.5	-2	-1	-1	-1.25	0.75	-2.25	-1.5				65.72	0.75	-3	0.5	-0.5	0.25	-0.25	-0.75	-0.5	-1.25
			65.76	-3	-1.75	-4.25	-0.75	0.75	-2.25	1.75	-2	-5.5				65.76	-2.25	-3.25	-2	-2.25	2	0.25	0	-1.25	-2.25
			65.8	-3.75	1.25	-2.75	-1	2	-3.75	0.25	-1.25	-3.75				65.8	0	1.5	0	1	2.5	-2.5	1	-1.5	-0.25
			65.84	-4.25	3	-1.75	-1	0.75	-2.25	-0.25	-0.5	-0.75				65.84	1.5	4.5	0.75	1.25	0.75	-0.75	3	-3	2.75
			65.88	-2.5	2.75	-2	-2.5	-0.75	-0.75	-2.75	0.75	-0.75				65.88	2.25	3.5	0.25	-1.5	-1	1.5	0.25	0.75	2.75
			65.92	1.25	0.5	-3.75	-3.75	-1.25	-0.25	-3.5	0.25	0.75				65.92	2.25	-0.75	-0.25	-3.75	0.5	2.25	-1	2.25	3
			65.96	1.75	-0.75	-2	-2.5	-0.25	-0.25	-3.75	1.75	-0.25				65.96	0.75	-1.5	1.75	-1.75	3.5	3	-1.25	2.5	0.75
			66	-1.75	0.25	2	1	0.25	-1	-1.5	1.5	-1.5				66	-2.5	1	0.5	1	3.5	0.75	-1.25	3	-1.5
			66.04	-4.25	-0.5	0.5	1	3.25	0.75	2.75	-0.75	-2.5				66.04	-1.75	1.75	-1.5	1.25	2.25	-1	1.25	0.5	-3.25
			66.08	-3.75	0.25	-1	0	2.75	3.5	3.5	-2	-1.5				66.08	0.75	1.5	-3.25	0.5	0	2	4.5	-1.75	-1.75
			66.12	-3.25	3.25	-1	1	0.75	3	1.25	-4.25	-0.5				66.12	0.25	1.5	-1.25	-0.25	0.5	3	5.25	-3	-0.25
			66.16	-3	5	1	1	-2	1	-0.5	-2.75	1				66.16	-0.75	1.5	2	-1.25	-0.75	1.5	1.75	-2	2
			66.2	-3.25	2.25	1	-1.25	-2	-1.5	0	0.75	1.5				66.2	-2.25	0.25	3	-1.25	-1.5	-0.25	-0.25	-1.25	2.25
			66.24	-3	1.5	2.75	-4	-0.5	-2.5	1.25	2	-0.75				66.24	-3	0.5	2	0.25	-3	0	0.5	-1.25	0.5
			66.28	-1.25	1	3.25	-6.25	-0.25	-0.5	3	-1.75	-3				66.28	-0.25	2.25	-0.25	1	-2.75	1.75	2.75	-1.5	-2.25
			66.32	1.75	1	-0.25	-4.5	0.5	1.75	5	-2.5	-0.5				66.32	1.75	1.75	-2.25	3.25	1.25	2.5	3.5	-1.5	0.75
			66.36	2.25	1	-3	0.5	1.75	2.5	2.25	-1.75	0				66.36	2.5	2.25	-3.25	4.25	3.25	1.75	0.5	-1	1.75
			66.4	1.75	1.5	-2.25	3.5	2.5	0.5	-1.75	-0.25	0				66.4	0.5	3.5	-3.5	-0.25	1.5	-1.25	-1.5	1.25	4.75
			66.44	-0.5	-1	1.5	3.5	2.75	-3.25	-2.25	-1.25	-2.25				66.44	-1.75	2	0.25	0.75	1.5	-3.75	-2.75	2.75	3.75
			66.48	-1	0.25	-1	2.5	1.5	-1.75	-1	-1.75	-4				66.48	-0.75	1	0.5	2.75	2.25	-0.75	-2.5	2.25	-0.25
			66.52	-3.5	-1	-3.25	3.25	0.25	-2	-1.75	-0.25	-0.5				66.52	-0.75	0.5	-2.5	2.5	1.5	-0.75	-0.25	1.75	1.5
			66.56	-4.75	-3.5	-2.75	2	-0.25	-4	-0.25	-1.25	1.75				66.56	-0.25	-1.75	-2	0	0.25	-0.25	3	0	2.25
			66.6	-1.25	-2.75	-2	2.75	0	-3.25	1	-4.75	-1				66.6	2.25	-3.75	0.75	2.75	0.5	2.5	3.75	-1.5	0
			66.64	0.5	-3.25	-1.25	1	-2.75	-1.75	2	-3.5	-1				66.64	0.25	-3.25	2	2	0	2.25	3	0.5	-1
			66.68	-0.5	-2.75	-2	-2	-4.25	-1.75	1.75	0.25	-0.5				66.68	0	0.25	2.75	-0.25	0	-0.25	1.25	0.25	-1.5
			66.72	-3	-2	-2.75	-7.5	-0.75	-2.75	1	2.25	0.25				66.72	-0.25	2.25	1.75	-2.75	-0.25	-2	1.75	1	-1.5
			66.76	-0.75	-2.5	-2	-4.75	0.5	-4.25	0.5	3.5	1				66.76	2.75	2.75	0.5	-1.5	0.25	0	2.5	2	0.75
			66.8	1.75	-2.75	-1	0.5	-1.5	-1.75	-1.5	0.5	0.5				66.8	2.75	1.75	1	1.5	-1.25	1.5	1.5	1.75	1.75
			66.84	1.25	-1.5	1.25	0.75	-3.5	-0.25	-3.25	-0.5	-3				66.84	1.5	2.25	2.25	2	-2.5	0.5	-1.75	3.5	1.25
			66.88	-1.5	0.75	-0.25	-0.25	-5	-0.5	-4	-0.25	-7				66.88	0	3.5	2.5	0.5	-1.5	-1.5	-2.5	3.5	-0.5
			66.92	-5	0	-3	-1	-5.25	-3.5	-5.25	-2.25	-5				66.92	-2.25	1.5	0	0.75	0	-1.5	-1.75	2.25	-2.25
			66.96	-3	0.5	-3.75	-3.5	-1	-3	-5	-2.5	-2.5				66.96	0.75	1	-1	1.75	3	0.25	1.25	0	-3.5
			67	0.25	-1.75	-5.25	-4.75	1.5	0.25	-2.25	-0.75	-1.75				67	5.75	1.25	-1.75	0.5	4	1.25	2.25	-1.25	-2.25
			67.04	-1	-1.5	-2.75	-5.25	-0.5	-0.25	-1.5	-1.25	-1.75				67.04	6.25	0	-1.25	-1.25	1.5	3.75	1.5	0.75	-1.25
			67.08	-1.75	-1.5	-2.75	-3.25	-2.5	0	-2.75	-1.5	-1.5				67.08	1.75	-1.5	-1.5	-2	-0.25	1.75	1	1.25	0
			67.12	-0.25	-1	-2.75	-1.5	-2.75	-1.75	-1.25	0.25	-1.5				67.12	0.75	-0.5	-0.5	-1.25	1	0	2.25	1	-0.25
			67.16	0.5	-2.25	-0.25	-2.25	-2.5	-4	1.25	-1	-2.25				67.16	0.5	-2.5	0.75	-1.25	1.25	-0.75	4	1.75	-0.5
			67.2	1	-4.75	0	-3	-2	-3	0.25	-2.25	-4				67.2	1	-3.25	1	-2.25	1	0.5	4.25	2.25	-0.75
			67.24	-1.25	-3.5	-3.5	-2.25	1	-1.75	-1.5	-4	-1.75				67.24	-1.25	-0.5	0.5	-0.75	1.5	2	4.25	-0.75	1.5
			67.28	-2	0.25	-5	-0.5	2.75	-0.75	-2.25	-3.75	-1.5				67.28	-2.25	3	1.75	-1.5	4	1	3.25	-0.75	2.75
			67.32	0.75	2.25	-4.75	1.75	2.25	-1.5	-1.5	-1.25	-2.5				67.32	0.5	2.5	0	1	4.5	-0.25	1	1.75	2.5
			67.36	-0.25	2.75	-3	1.25	0	-1.25	-2.75	-1.5	-3				67.36	1	3	-0.75	0.75	1.75	0.25	-3	3	2.25
			67.4	0.5	1.25	-0.75	-0.25	-1	-3.25	-3.75	-1	-2.5				67.4	2	3.5	-1.5	1	-2.5	-2.25	-2	1.25	3.75
			67.44	-1.5	-2	0.25	-1.75	-0.25	-2.25	-1.25	1.75	-3.75				67.44	0.25	2	0	0.25	-0.25	-0.75	2.25	0	1.25
			67.48	-1.5	-1.25	-0.25	-0.25	-0.75	0.75	-0.5	0	-3.5				67.48	-0.25	0.5	-0.5	1	1.75	1.75	2.25	0.5	-0.75
			67.52	0.5	0.25	-0.5	0	-0.25	0.75	0.5	0.25	-1.5				67.52	0	-1	-0.75	0.5	2	2.5	1	-0.5	0.25
			67.56	0.5	1.75	-0.5	1	-2.25	-1	-0.75	1.25	-1.5				67.56	-0.75	-2.5	-0.5	1.25	0.25	4	-1	0.5	3.25
			67.6	0.75	2.5	-0.25	2.5	-1.5	-3.5	-1.5	-0.25	0.5				67.6	-1.5	-2	1.5	2.75	-2	1.25	-0.25	1.5	4.5
			67.64	0.75	1.75	0.5	2.25	0.25	-2.25	-1	-2.25	1.25				67.64	2.5	0.5	4.25	4	-2.25	0.25	0	1.75	2.25
			67.68	-1.25	0.5	2.75	2	0.5	1.5	0.25	-2.25	2.75				67.68	4.5	1.5	3.75	3.75	-0.75	1	1.25	5	-1
			67.72	-3.5	-1.75	0.5	0.5	-1.25	4.5	0.5	-2	1.75				67.72	0.75	-1.5	0.5	2.25	-2	1	-0.5	5.25	-2.5
			67.76	-5.5	-0.75	0.25	1	0	2.5	0	-1.5	-2.75				67.76	-4	0.5	0	2.25	-0.75	0.75	-0.5	4	-3
			67.8	-4.25	1	-0.25	2.75	0.25	-0.75	0.5	-2.75	-3				67.8	-1.75	1	-1	3.25	-1.25	2.5	1	0	-1.25
			67.84	1	1	0.5	1	-0.25	-1.75	-0.75	-3.5	-0.5				67.84	2.25	2.5	0.25	-0.5	-1.25	3.5	1.25	-2.5	1
			67.88	4	-0.75	-1.25	-2.5	0	-1.5	-1.25	-5	-2.5				67.88	2.25	2	0.25	-4.5	0.75	2.5	1.75	-2.5	0
			67.92	4	-2.5	-3.25	-4	0.25	-2	1.25	-3.25	-3.75				67.92	-0.25	1.25	-2.25	-2.75	-0.75	0.75	3.75	0.5	0.25
			67.96	0.5	-2	-3.5	-3.25	-0.25	-2.25	0	-2.75	-2.75				67.96	-1	1.25	-3.25	0.25	0.25	-1.25	4	2.5	0.75
			68	-0.25	-1.5	-4.25	-4	-1.5	0.5	-2	-1	-0.25				68	1.75	0.5	-2.5	0.5	1.75	-0.25	-0.75	3.25	0.5
			68.04	2	-2	-0.75	-2.75	-3	1.75	-3.5	-0.5	-1.25				68.04	4.25	-0.25	2.75	0.75	1.25	0.75	-3.75	1.25	-1.75
			68.08	1.75	-3	2.5	-2.25	-0.75	-2.5	-3.25	1.25	0.25				68.08	4.25	1.25	5.25	-0.5	1	-2.75	-3.25	2	-0.75
			68.12	-1.25	-2.5	3.25	-2.5	0.25	-1.75	-2.25	1	0.25				68.12	2.75	3.25	4.5	-1.5	2.5	-2.5	0.25	2.5	0.5
			68.16	-3.75	-0.75	1.5	-1.5	-0.75	2	-3	-0.25	-4.25				68.16	1.25	1.5	4	-1.75	3	0.75	1.75	2	-0.75
			68.2	-4.5	-1	-1	-1.25	-1.75	1.75	-2.75	-1.75	-4.75				68.2	2.25	-0.75	3.25	0.75	1.75	3.25	0.75	0	-1.75
			68.24	-4	1	-1.5	-5.75	-2.75	2.5	-1	-1.75	-0.75				68.24	0.25	0.75	-0.75	-1.5	1	5	-1.25	-0.25	-0.25
			68.28	-3	0.75	1.75	-4	-2.5	2.5	0	-1.25	0.25				68.28	-3	1.25	-1.25	-0.5	0.5	4	-1.75	2	1.5
			68.32	-0.5	-1	3	-0.75	-0.25	-3	2.25	3.75	0.5				68.32	-0.75	-0.5	0	1	2.5	-0.25	0	4.5	1
			68.36	-0.5	-2.5	-1.25	1.5	-1	-4	-1	2.25	-0.25				68.36	-1.25	-2.75	0.5	0.75	3	-0.75	2.25	4	-0.25
			68.4	-1.75	-0.5	-2.75	2	-4.5	-3	-3.75	-2.25	-1				68.4	-1.75	-2.75	0.75	2.5	2.5	1.25	1.5	1	-0.5
			68.44	-0.25	1.75	-2.25	4	-4.75	-3.75	0	-3.5	-1.75				68.44	0.5	0	1.25	6.5	0.75	1	1.75	-2.5	-2
			68.48	1.5	3.25	-3.25	5.25	-0.75	-2.5	2	-3	-1.75				68.48	1.5	2	3	6.25	0.5	-0.75	3.75	-1.5	-2
			68.52	0.5	1.5	-2.5	2	2	0.25	1	-1.25	0.5				68.52	1.25	0	3.75	1.75	-0.25	-0.5	3.5	0.25	0.75
			68.56	-1.25	-2.5	-2.5	-2.75	2.25	-1.75	-1.25	1.5	-0.75				68.56	-1	-2	2.5	-2.75	0.75	-1.25	1.5	-0.25	0.5
			68.6	-2	-3.75	-1.25	-4	0.5	-3.5	-4.75	1.5	-4				68.6	-1.25	-1.25	0.5	-1.75	-0.5	-3.5	-1.75	2	0
			68.64	1.75	-3.5	-1.75	-3.75	-1.25	-3.5	-4	1	-5				68.64	-0.75	0.5	1.25	1.5	-2	-2	-1.25	4.5	-1.5
			68.68	-0.75	-2	-1.75	-2.25	-2.25	-0.5	0.5	1	-0.5				68.68	-1.25	0.5	0.75	1.5	-1.5	2	0.75	5	0.25
			68.72	-4	-0.75	-2	-0.5	-4	2.75	2	-0.75	2.25				68.72	-0.25	0	-0.5	-0.5	-0.75	3.25	2	3	3.25
			68.76	-4.25	-1.75	-3.75	0.75	-3.25	1.25	1	-1	1.5				68.76	0.75	-0.5	-2.25	0	0	0.5	2.75	-0.25	4.25
			68.8	-2	-2.75	-1.5	2	-1	-1.75	-1.75	2.75	0.25				68.8	3.25	-0.5	-0.5	1.5	2.25	-1.5	2	1.5	1.75
			68.84	-0.5	-1	1.5	2.5	0.5	1.5	-1.75	1.75	-1.5				68.84	2	1.5	3.25	3	3.5	0	0.75	2.75	2.5
			68.88	-0.5	0.25	-0.25	-0.25	-0.75	2.75	-0.75	-3.25	-4				68.88	-1	2.5	5.5	0.75	0.25	3.5	0	2.5	2.5
			68.92	-1.5	1.75	-1.75	-2	0	2	-0.75	-4.25	-2.75				68.92	-0.75	2.25	4.75	-2	-1.25	4	-1.5	0.5	1.75
			68.96	-3	1	-2.25	-2	1.75	-0.5	-0.5	-2.75	2.25				68.96	-0.75	1.25	1.5	-1.75	-1	1	-1.25	-1.5	2.25
			69	-1.5	1	-0.25	-1.25	4.5	0	1	-1.25	4.5				69	0.5	2.25	0.75	-2.75	1.25	0.75	-0.25	-1.5	2
			69.04	1.5	2.75	0.25	0.5	3.5	-0.25	2.5	-2.25	2.5				69.04	2	2	1.25	-1.25	0.75	1.75	3	-1.5	1.25
			69.08	1.25	1	0	-1	-0.75	0.75	2	-1.75	-1.75				69.08	1.25	1.25	2.5	-0.75	0.75	4.5	3.25	2	2.75
			69.12	0	-1	0	-2.75	-1.25	1.25	0.75	0.5	-1.5				69.12	2	1.5	2	-0.25	2	5.25	1.5	3.5	1.25
			69.16	0.75	0.25	0.75	-3	-0.25	-1.25	-2.25	2.5	-0.25				69.16	4.25	3.75	0.5	1.75	1	2.25	-0.25	1.5	1.5
			69.2	-0.75	2.5	1.75	-2.25	1	-2.25	-2	2.5	0.5				69.2	0.75	2.5	0	0.75	0	0.5	-2.75	-0.75	1.75
			69.24	-1	5	-0.5	0.25	0.75	-1.5	-0.25	2	0.25				69.24	-2	3	-0.25	-1.25	-2	-0.5	-2	-0.25	2
			69.28	-0.5	1.5	0	0.75	-0.25	0	-0.75	-0.75	1.75				69.28	-3.5	1	0.5	-1.5	0	-0.25	-2	-1.25	3.5
			69.32	2.25	-2	-1	-2	-1	2.25	-2.75	-0.5	0				69.32	-1.5	-2.25	1.75	-1.25	1.75	3.75	-1	-1	2.5
			69.36	0.75	-1.75	-1.25	-2.25	-1.75	3.75	-2.5	0	-1.5				69.36	-1.75	-1.25	1.25	0.5	2	5.75	2.5	-1.25	1
			69.4	-1.75	-1.75	0.5	-0.5	0.25	0.25	-1	-1	-4				69.4	-2.5	-0.5	1.75	1.25	1.5	0.25	2.75	-2	-0.75
			69.44	-0.5	1.5	-2.75	-0.25	-1.25	-0.75	2.25	-4.75	-2				69.44	1.25	0	2	0.25	-1	-2.75	2.5	-1.5	-1.5
			69.48	0.5	2.25	-2.5	-1	-1	1	1	-3	0.25				69.48	3	0.25	-0.25	-0.5	-1	0	1	2.5	0.25
			69.52	-0.75	3.25	1	0.25	1.25	1	0.5	0.5	0.75				69.52	2	-0.25	-2.75	1.25	0.5	-0.75	3.5	5	0.25
			69.56	-1.75	2.25	2.5	1.5	0.25	-1	2.25	1.75	3.25				69.56	2.75	0.25	-1.75	1.75	0.25	-3	3.25	2.5	1.25
			69.6	-1	-1.5	4.25	0.25	2.25	-0.75	0	2.5	3.5				69.6	4	-0.25	2.75	0.75	2.75	-2.25	1.25	0.25	1.5
			69.64	2	-3.25	-0.25	-0.25	0.25	-1.25	-3.75	0.5	-1				69.64	4.75	-1.75	0.25	-1.5	5.25	-1.5	-1.5	-0.75	0.25
			69.68	3.5	-3.5	-4.25	-1.75	-2.75	-2.75	-5.5	-0.25	-3.75				69.68	3.75	-2.75	-3	-3.25	4	-0.75	-1	-0.25	-1.5
			69.72	2	-1.5	-0.5	-1	-0.5	0	-3.75	-0.75	-3				69.72	3	-3	0	-0.25	3.25	5.5	0.75	-1	0
			69.76	-3	2.75	1.25	-0.25	2.25	3.25	-3.75	2	-4.25				69.76	1.5	1.5	1.25	1	2.5	7	0.5	0	1
			69.8	-3.75	0.75	2.75	0	3	2.5	-2.75	2.5	-3.25				69.8	0.25	1.5	1.5	0.25	1.25	3	-1.5	1.75	1
			69.84	-3	0	1.75	2	1.5	0.75	-2.25	-1.25	1				69.84	-2.75	1.75	0	2	-0.25	0.5	-4	2	0.5
			69.88	0	-0.25	-1.5	2	-1.75	-0.75	-2.75	-1.75	2.25				69.88	-3.25	2	-3	3.5	-2	-0.25	-3.25	1	1.75
			69.92	1.75	0.25	-0.25	-1	-2.25	-1.25	-2.25	0	0.75				69.92	0.25	1.25	-1.25	1.5	-1.75	1	1.5	0.5	1.25
			69.96	-2.25	-0.75	1	-2.5	-2.75	-1.5	0.75	2.25	0.75				69.96	-0.25	1.25	0.25	1	-2.5	0.75	2.75	2	0.75
			70	-2.5	-1	0	0.75	-2.75	-3.5	3.25	0.5	1				70	1	1	0.25	2.5	-1.5	-0.25	1.25	-1.25	2.5
			70.04	-0.5	-2.5	-2	1.25	-1.75	-1.75	2.75	-0.5	1.25				70.04	1.25	0.5	-1.5	2.5	0	0.5	1.5	-3.75	3
			70.08	0	-2.5	1	1.25	0.5	2.75	-0.25	-1.25	-1.5				70.08	0	1	-1.25	4	-1.25	2.5	0	-5	1.75
			70.12	1	-2	3.75	-0.25	-1.25	4.5	-0.25	-1.75	-2				70.12	0.75	-1	1.25	1.5	-1	2.5	0.25	-3	2.75
			70.16	-0.25	0.75	1.75	-3.5	-2.5	4.75	0.25	1.5	1				70.16	-1	-1.5	4.5	-1.5	-1	0	0	1.25	2
			70.2	0	2.25	1	-5.25	1.25	1.75	1.25	3.5	3				70.2	0	-1.5	4.75	-1.75	1.75	-2.25	-0.25	3.75	-0.5
			70.24	3	0.25	1.25	-1.75	2.75	1.25	2.5	1.5	1.75				70.24	0.75	0	1.75	1.75	3.25	0.75	1.5	2.5	-2.25
			70.28	4.75	-0.25	2.25	2	4	-1	2.25	0.75	0.5				70.28	0	1.5	0.75	2.75	2.75	1.75	2.25	2	-1.75
			70.32	5	3	1.25	3.5	2.5	-1	0.5	-0.5	-1				70.32	2.25	4.75	0.25	1.25	1	2.5	2	1.5	-1.25
			70.36	0.75	4.25	-1.5	3	2.5	-0.25	-0.5	-0.75	1				70.36	2.5	4.25	0.75	0.25	0.5	2	2.75	0	2
			70.4	1	4.5	-2	0.75	2.5	-1.25	0.75	1.25	1.75				70.4	3	2.75	1.25	-1.5	1.5	-0.5	0.5	1	0.75
			70.44	3.75	5.25	2.5	1	2	-4.75	0	0.25	-1.25				70.44	3.5	2	4	0	1.25	-1	-0.25	0.25	0.25
			70.48	3	3.75	7	2.25	2.5	-5.25	-1	-1.5	-0.25				70.48	3	1.75	5.75	2.75	0	-0.25	-2.5	-0.5	2.25
			70.52	2.5	-0.75	4	1.75	2.5	-1.75	-1.75	0.75	1.75				70.52	2.75	0.5	4	4	0.25	1.25	-3.25	2.25	2.5
			70.56	1	0	1	0.5	3.5	0.25	-3.5	-1.5	2.5				70.56	1.5	-0.25	0.25	2.75	2.25	0.25	-2	-0.25	2.75
			70.6	-0.75	0	-1.5	1.25	3	-0.5	-2.5	-2.5	1.25				70.6	1.75	-1.5	-3	1.75	2	0.5	-0.5	-2.25	2.75
			70.64	-2.25	-0.25	0.25	0	3.5	0	-0.75	-1.25	0.25				70.64	0.5	-2	-0.75	0.5	2	-0.5	-0.25	-0.5	0.75
			70.68	-0.75	1.5	1	-0.5	3.25	2	0.5	0.75	1				70.68	0.25	1.5	1.5	2.25	2.75	0	-0.5	3	-1
			70.72	2.25	2.5	-2	0.5	5.25	1.5	1.25	0.5	0.5				70.72	0.25	1.75	-0.5	2.75	4	1.75	-1	2.75	-3.25
			70.76	4.75	0.25	0.75	1.5	3.25	0.5	2.5	-1	1.75				70.76	-0.5	-0.5	0.25	1.5	2.75	3.75	-0.25	1.75	-1.75
			70.8	2.5	0.75	3.25	3.25	0.75	2.5	1.5	-1	0.5				70.8	-2	0.5	1.5	2	-0.75	2.25	0.75	1.5	-0.75
			70.84	0.25	1	2.5	2.75	-1.25	4.25	2	-1.75	0				70.84	-2	2.5	1.75	0.5	-4.25	0.75	3	1	1
			70.88	0	-0.25	1.5	2	-0.25	4.5	-0.5	-0.5	-1				70.88	0	1.5	2.25	-1.5	-3	2.5	1.25	1.25	0
			70.92	2.5	-0.5	1.5	4.25	4.25	2.25	-1	3	-0.5				70.92	3	2.75	3.5	0.75	1.75	-0.25	-1	2.5	1.5
			70.96	1.5	-2	2.75	3.25	3.5	0.75	0	2.5	-1.25				70.96	1	1.5	3.5	0.25	4	-2.5	-0.25	2.25	0.25
			71	-3.25	0.75	3.25	1.75	1	1	-0.25	1	-2.5				71	-0.75	0.75	4.25	-3	2.5	-1.25	-1.5	1.5	-1
			71.04	-4.75	1	1.25	0.5	0.25	1	0.5	1	-1.75				71.04	-1	0	3	-3	0	0.5	-2.25	0	2
			71.08	-2	1.5	0.5	0.75	-0.25	0	1	2.25	2.25				71.08	-2.25	-0.25	0.25	-0.75	-1.25	1.75	0	-1	4.75
			71.12	0.75	2.25	1.5	-0.75	-1.5	-2.25	0.5	2.75	1.75				71.12	-1.75	2.75	-2.5	-0.75	0	1.5	2	-0.25	4
			71.16	2.5	1.25	0.5	-2	-1	2	-0.25	1.75	-0.75				71.16	2.5	5	-2.5	-2.75	1.25	3.5	2.75	2.25	0.5
			71.2	2.75	-0.5	1.25	-1.75	-0.25	3.5	2.75	2.25	-0.5				71.2	2.5	3.5	2.25	-2	3.5	4.5	3.5	5.5	1.75
			71.24	0.75	0.5	0.25	-0.5	1.25	1.5	1.5	1.25	3				71.24	-0.25	2.5	3	-0.75	4.75	1.5	0.75	4.75	3.5
			71.28	-1.75	2.5	0.5	-3.25	1.75	-1.5	-0.25	-2.25	5.75				71.28	-1	4.25	3	-0.25	3.25	-2	-0.5	0.25	4.25
			71.32	-1.75	0.25	-0.25	-4	2.5	-1.75	-1	-3	5.5				71.32	0.75	1.25	1.25	0.25	2.25	-3	-0.25	-0.5	1.75
			71.36	0.75	0.75	-2.5	-1	3.5	0.25	-1.25	-0.25	0.75				71.36	1.5	0	-3.25	0.25	1.5	-0.25	-2.75	0.25	-0.5
			71.4	1	0.5	-1.75	0.75	1	0.25	-0.75	3	-0.25				71.4	0.75	0	-5.25	1.25	0.5	1.75	-1.25	2	-1.5
			71.44	0.75	1.5	1.5	0.75	-0.25	-1.5	1.25	5.25	-0.75				71.44	0.75	-0.5	-2.25	3.25	-0.75	1.5	0	5.25	-1
			71.48	1.25	3.5	1.5	0.5	-1.25	-2.25	2	2.25	1				71.48	1.75	-1.25	0	1.5	-2.25	2.25	1.75	2.75	1
			71.52	2.5	4	-1.25	1.25	-1.25	1.5	0.75	1.75	2.5				71.52	3	-0.25	2	0.25	-1.5	3.25	1.75	1.25	1
			71.56	1.25	0.25	1.5	-1.5	-1.5	4	-1.5	0.75	1				71.56	1.5	0.5	3.25	-4.75	-1.75	1.5	1.75	-1.25	-0.75
			71.6	0.25	1	1.25	-2.75	-3.75	5.75	-4.25	1	0				71.6	-2.5	1.5	1.5	-6.75	-0.75	3	-0.5	-0.5	0.5
			71.64	0.25	2.5	2.75	-2.25	-3	5.75	-2	-0.5	1.75				71.64	-2.75	2.5	0.25	-2.75	1.5	4.25	0.5	0	2
			71.68	2	2.75	4.5	-3.25	-0.25	3.5	1.25	-2.25	1.25				71.68	0.75	0.5	1.5	-1.25	0	1.5	1.25	0.25	1
			71.72	2	1.75	5	1	1.5	0.25	1	-3.25	0.5				71.72	0.25	-3	3.25	1	-1.75	-0.5	2.25	-1.25	-0.75
			71.76	0.5	-0.5	2.5	4.75	-1.5	-0.75	1	-3.75	1.5				71.76	-1.5	-4.75	2.75	3.75	-2.5	-0.75	2.75	-4.75	-0.25
			71.8	1.25	-1.75	0.25	5.5	-3.5	-1.25	1	-2.25	1.5				71.8	0.5	-1.75	1	3	-1.25	0.75	2.75	-1.5	2.75
			71.84	-1	-0.25	-2	4.5	-1.75	-0.25	2	-2.75	0				71.84	0	1.25	0.75	1.75	-0.25	1.25	4.75	1	1.75
			71.88	-5	1.75	-2.5	1.75	-0.25	2.25	4.75	-1.75	-0.75				71.88	-4	2	1.5	2.5	0.25	2.25	5.5	0.25	0.75
			71.92	-3	-1	-0.75	2.5	2	0.5	2.25	0.5	2.75				71.92	-2.25	-0.25	1	3.5	2.25	-0.5	1.75	-0.25	3.75
			71.96	-1.5	-1.25	-0.5	6.5	1.25	-2.25	-0.25	0.5	3.25				71.96	1.5	-1.5	-2.5	3.25	2.25	-1.75	-1.5	0	3.25
			72	-0.5	2	2.25	5.25	-0.25	-1.75	-0.5	1.5	1.25				72	3.5	2.25	-2.25	0.25	1	-0.75	-0.5	0.75	1.25
			72.04	2	2	3	1.25	2	0.75	0.25	3.5	-0.75				72.04	4	3.25	1.25	0.25	1.75	0.75	2.5	1.25	-0.75
			72.08	4.75	0.5	1.25	-2	2.25	1.25	1	6	0.5				72.08	3.25	1.25	2.25	-0.75	1.5	3.25	2.5	3.5	1
			72.12	2.5	-1.75	-1.75	-1.25	1.5	3	0.75	4	0.5				72.12	0.75	0.5	0.25	0	0.75	5	-1	2.5	0.25
			72.16	2.75	-0.75	-1	2.25	2.5	3.5	1.75	2	1.25				72.16	2.25	0	1	2	1.25	2.75	-0.75	1.75	-0.5
			72.2	4	0.75	-0.25	2	3.25	1.5	1	0.75	1.25				72.2	2.75	0.25	-1.25	1.25	1.75	0.5	2	1.25	-2.25
			72.24	3.5	-1.5	2.5	2	5.25	1.25	-1.25	0	1				72.24	1	-2.75	0.5	1.75	3.75	0.5	-0.5	1.25	-3.5
			72.28	0.25	-2.5	3.75	2.75	2.5	-0.75	-1.75	0.25	1.5				72.28	-1.5	-4	2.25	2.25	3.25	-1.75	-0.5	1.25	-0.25
			72.32	-3.25	-1	1.75	1	-0.25	-1.25	0.25	1.25	2.25				72.32	-3.75	-0.75	2.75	1	0.75	-1.5	2	3	4.5
			72.36	0	2.75	0.75	-0.25	-0.75	2.5	0.75	4.5	0.25				72.36	-2.5	6.5	2.25	0.5	-2	2.5	0.25	3.5	6.5
			72.4	2.5	3	0	-0.5	-2.5	3.5	0.75	5.5	0.5				72.4	1	8	-0.75	1.25	0.75	3.25	0.5	4.75	5.75
			72.44	1.75	-1.25	-1.75	0.5	-1.25	1	0	2.25	1				72.44	2.5	4.75	-3	1.5	3.5	1.5	2	4	3
			72.48	2.25	-1.75	0	1.5	0	1	-1.5	-2	1.25				72.48	1.25	0.75	-1.25	3.25	4.25	3	0.25	2.25	0.75
			72.52	1	0.75	2.25	0.25	1	1	-2.5	-2.5	1				72.52	-0.25	0.75	1.75	3.75	1.75	4.25	-2	1	1.25
			72.56	-0.5	1	1	-0.25	3.25	2.5	-2	-1.5	0.75				72.56	1.25	0.75	1.25	1.75	-0.25	4.5	-1	-0.5	0.5
			72.6	0	1	0.25	-1.25	2.75	1	-0.75	0.5	-0.75				72.6	0	2	1	1.5	0.25	0.5	1	-1	-0.25
			72.64	-0.25	2	0.5	0.25	3	0.25	-1	1.25	-1.5				72.64	-0.5	2.5	-1	2.5	3.5	-1	0	-0.75	-1.75
			72.68	-0.75	0	0	1	0.75	2	0.25	0.25	-2.5				72.68	1.5	-1.5	-1	0.5	2	-0.25	-0.5	-1.5	-1.5
			72.72	-0.5	-0.75	-0.5	0.25	0.25	2.5	0.75	-0.5	-0.5				72.72	2.25	-3.75	1	-2.25	1.5	-1.25	0	-2.25	1
			72.76	-0.5	0.25	0.75	0	1.25	1.25	1.25	-3.75	0.25				72.76	0.5	-0.25	3	-2.25	0	-1.25	0.75	-1	1.5
			72.8	0.5	-1.5	2.75	0	2.25	0.25	2.25	-4	3				72.8	-0.25	-1	4.75	-1.5	-1	0.75	0.5	-0.75	2.75
			72.84	0.75	-0.5	2.5	-2.25	0.5	-1.75	2.25	-0.75	2.75				72.84	1.25	-2	4	-1.25	-2.75	0.25	-1.25	0.75	3.25
			72.88	-2	1.75	1.25	-1.25	-2.5	-1.25	4.75	-1	1.25				72.88	-1	0.25	2	0.5	-1	1.25	1.25	-1.25	0.5
			72.92	1	-1.75	-0.75	0.5	-1.5	-0.5	2.5	0	-0.25				72.92	1.25	-0.5	-0.5	0.25	2	0.25	2.25	-2.75	-0.25
			72.96	3	-1.75	-2.25	-0.75	-2.25	0.5	1.5	4.25	1.25				72.96	3.75	-0.25	-1.25	-3.25	-0.25	0.25	4.5	0.25	0.5
			73	1.75	-0.25	0.25	0	-1	2.25	3.25	3.5	2.25				73	2.25	1.5	-0.5	-3	-2.25	1.75	6.25	1	0
			73.04	1.5	2	1.5	-0.25	0	0.25	2.5	1	-0.5				73.04	2.25	0.75	-1	0.75	-3.5	-0.5	4.5	1.25	-1.75
			73.08	1.25	1.5	2.25	-0.5	-1.75	-0.75	0.5	-1.5	-1.25				73.08	0	-1.5	0.75	1	-6.25	-1.25	1	0	-2
			73.12	1.75	-0.25	0	1	-0.75	-0.5	0	0.75	-0.5				73.12	-2	-3	1.75	1	-2.75	-0.75	0.25	0.75	1.5
			73.16	-0.5	1	-0.5	0.25	-0.5	0	-0.5	1	0.75				73.16	-2.5	-0.75	1.5	0.5	-0.25	-1.75	-3	1.5	1.5
			73.2	-2.5	0.75	2	-0.5	-2.25	0.75	0.75	0.75	1				73.2	-1.5	-1.5	0.5	0	1	-2.25	-3.5	3	0.25
			73.24	-2.5	2.25	3.25	-3	-3.25	1.25	1.75	3.75	0				73.24	-2.25	0.75	1	0.5	-1	-0.5	-0.75	2.25	0
			73.28	-2.5	1.25	2	-2.25	-3.25	1.25	-0.25	4.75	-1.5				73.28	-0.75	0.75	1.5	2.25	-0.75	-0.5	0.5	2.5	-1
			73.32	-2.75	0	1.25	0	2.25	2	0.5	3.5	-2.75				73.32	1.25	1.5	3.25	2.5	3.5	0.75	3	3.25	-1
			73.36	-3	0.5	-0.75	-0.75	4.75	-0.25	1.75	1.25	-3.75				73.36	0.5	1	1.75	1	2.75	0.75	3.5	1.75	0.25
			73.4	-0.25	0.5	-1.75	0.75	4.25	0.5	-0.5	1.75	-2				73.4	-1.25	0.75	-1.25	2.25	1	0.5	-0.5	-0.75	3.25
			73.44	3.5	2	-2.25	-1	2	-0.5	-0.75	5.25	1				73.44	-0.75	2.5	-3.75	-0.75	0.25	0.5	1.25	1.75	3.25
			73.48	3.75	1.75	-3	-0.75	-0.5	-1.25	-0.25	4	2				73.48	0.75	1	-3.25	-1.5	-0.75	1	1.25	2.25	-0.5
			73.52	3.25	2.25	-0.75	-0.5	0	0.5	0	-1	3.5				73.52	0.5	0.25	-2	-1	0	0.5	-0.5	-1	-1
			73.56	3.25	4	1.5	0.5	-0.5	1.75	1.5	-2.25	2.5				73.56	1.25	-1.25	0.75	-2	0.5	0	3	-1.75	1.75
			73.6	1	3.5	-0.75	1.25	0	1.5	0.25	-0.5	1				73.6	-0.25	-0.75	1.5	-0.5	2.5	1.75	5	1	1.75
			73.64	1	1.75	-3.5	4.25	0.5	3.5	-0.5	-0.75	-0.25				73.64	-0.25	-0.5	-2.25	2.75	1	3.75	3.25	1.75	-0.5
			73.68	0	0	-3	2.75	1.5	3.75	-0.75	-1.5	-0.5				73.68	-0.5	1.75	-2.25	3	-0.5	3.5	1.25	0.5	-3
			73.72	-1	1.5	-3	1	2.5	2.25	0.75	-0.25	-0.25				73.72	-1.75	1.5	-1	0	1.25	2	0.5	-1.75	-1.75
			73.76	-1.25	2.5	-1.25	-0.25	1.75	-1.5	2.5	2	-2				73.76	-3.75	1.5	1	-3	1.25	-2	1	-1.25	-1.75
			73.8	0	0.5	0.5	-1.25	0.25	-1	2.75	1.25	-1.75				73.8	-2	2	3.25	-4.25	0.25	-4	2	0.25	-2.25
			73.84	2.75	1	3.75	-4.5	-3.5	-3.5	2.5	0.75	2.75				73.84	1.75	3	2.5	-6.25	-1	-1.5	1.5	1	-0.5
			73.88	3.75	-0.5	2.75	-3.75	-3.5	-3.75	0.5	0	2.5				73.88	2.5	-1.25	-1	-4.25	-1.25	0.5	0.25	-1	0
			73.92	2.75	-1.75	2	0.5	-3	-0.5	0	0.5	1.75				73.92	0	-2.25	-1	0.75	-4	-0.75	-0.75	0	0.75
			73.96	0	-0.75	0.25	0.5	-3	3.5	-0.5	1.25	4				73.96	-1.75	0	-2.25	2.75	-3.75	-0.25	-0.5	0.75	2.5
			74	-5.25	-1.25	-1.5	0.75	-1	5.25	1.5	0.5	3.75				74	-5	-0.25	-4.5	2.75	-3	2.25	0.75	-1.25	1.5
			74.04	-2.75	0.25	1.75	1.5	0.5	4.75	2.5	-2	3.5				74.04	-2.25	-1	-3.5	2.5	-1	3	0.25	-1.5	-0.25
			74.08	-0.25	2.75	-0.25	1.5	1.25	5	1	-3.25	1.5				74.08	0	-1.25	-3.75	-1	-1	0	-0.5	-2	1.25
			74.12	1.25	3	-2.5	-0.25	-0.5	2	-0.75	-1	-0.75				74.12	0.25	0	-2.5	-1.25	-2.5	-3.25	-1.25	-0.5	1
			74.16	2.25	2.25	-1.75	-1.5	-0.75	-1.75	-1.75	3	-1.5				74.16	-1.25	4	-2	-2.5	-1.25	-5.25	-3.5	3.25	0
			74.2	2	1.5	-1	-3.5	0.25	-1	-0.75	4	-0.5				74.2	0.5	3	-3.5	-4.25	0.75	-1.75	-4.75	4.75	2.25
			74.24	-1.25	2.75	1.25	-3	-0.25	1.5	1	3.75	2.25				74.24	0.25	1	-1	-5	0.5	2	-3.25	4.25	1.5
			74.28	-0.75	1.5	2	-1.5	1.5	0.75	1	1.25	-2.25				74.28	-0.25	0.25	0.25	-2.5	1	0.75	-1	0	-0.5
			74.32	1.25	-0.25	1.75	0.75	0.5	1.5	0.75	-1	-4.5				74.32	-2	-0.25	2.25	1	-1.75	-0.25	2.5	-3.5	-1.75
			74.36	2.5	-1.25	5.75	2.75	-0.5	1	2	-2	-2.75				74.36	-1.75	-3.25	5.25	1.5	-4.25	0.5	1.75	-1.25	-2
			74.4	-0.25	-0.5	3.75	2.25	1.5	1.75	2.25	-1.75	-1.75				74.4	-2.25	-4	4.75	1.5	-2	1.5	-0.25	-0.25	-2.5
			74.44	-2	0.25	-0.75	-2.25	2	2.5	1.75	-0.25	1.5				74.44	-2.75	-2.5	1.5	0.75	1.75	-0.5	0.75	0	1.75
			74.48	-3.5	2.5	-0.25	-3.5	3.25	3	-2	-0.25	2.25				74.48	-1	1.5	0.5	-0.75	3.5	-0.75	-2.5	-1	3.25
			74.52	0.25	3.75	0.25	-0.75	2	1.25	-4.25	-1.5	3				74.52	1.5	3	-0.25	1	1.25	2.5	-4.5	-2	3.5
			74.56	2.25	3	0.75	2.5	0.25	1.75	-3.75	1	0.5				74.56	1	-0.5	-0.5	2	-0.25	2	-5.75	-1.75	1.5
			74.6	2.25	2.5	0.25	5.75	0.25	3	0	2	-1.5				74.6	0.75	-0.75	1	3.5	-2.25	0.5	-3	-0.75	-0.25
			74.64	1.5	1.75	1	5	0.75	2.5	0.5	-1	0.75				74.64	-0.25	-0.5	1.5	2.75	-0.75	0.75	1.5	0.5	-1.75
			74.68	0	-0.75	2.5	4.75	1.75	1	-2	-2	2				74.68	-2	-2	0.25	2.75	0.5	2.25	1.25	-0.75	1.25
			74.72	0.25	0.75	1.5	2.5	2.5	1.75	-2	-2.25	1.25				74.72	-1.25	0.75	-1	0	2	1.75	0	-1.75	1.75
			74.76	-0.75	-1	0.75	0.25	-0.75	4.5	-1	-0.25	0.5				74.76	-0.25	1.5	1.25	-2.25	1	1	-2.75	-1.75	0.5
			74.8	-1	-6.25	0.5	-1.25	0	3.75	0.75	0.75	-1.25				74.8	0.75	-1	1	-2.25	1.5	-2	-3	-3	0
			74.84	1.75	-3	0.5	-1.75	2.5	3	0.5	1.5	-4.75				74.84	0	-0.5	-0.25	-2.25	0.5	-1.5	-3	-2.25	-1.25
			74.88	3.25	1.75	-0.5	-0.25	3.25	3.5	-0.25	0.75	-1.5				74.88	0.25	1.5	-1.75	-2.5	-0.5	1.5	-2	-0.75	-0.5
			74.92	4	1.75	2.25	3.5	-0.25	1.25	1.25	0.75	0				74.92	-0.25	-0.5	-0.5	-1.75	-2.5	-0.5	-0.75	0.25	0.75
			74.96	4	0	2	3.75	-2	-2	2	2.25	0.25				74.96	-0.25	-2.25	-0.5	-2.25	-2	-3.5	1.75	1.25	0.25
			75	4.5	-2.25	-0.75	0.25	1.5	-0.25	2.75	2.5	1.75				75	1	-4.25	-1	-4	-0.25	-0.25	1.5	0.75	-1
			75.04	2.5	-1.5	-1	-2	2.25	1	2	0.75	0.75				75.04	1.5	-4.75	-3.25	-3.5	0	2.25	-0.5	-0.25	-2.25
			75.08	-0.25	1.25	-2.25	0.5	0.75	0.5	1	0.25	1.25				75.08	1.25	-2.75	-7	-2.75	-0.75	-2.25	-0.75	-0.75	-1.75
			75.12	-1.75	0.75	-0.5	4.25	0	2	1	-1.5	-1				75.12	-2	-1.5	-5.75	0.75	-1.5	-2.5	0	-3.5	-0.75
			75.16	-2	0.25	3	2.5	1.5	1.75	1.5	0.25	-0.25				75.16	-4.5	-1.25	-0.25	2	1	-1.5	-3.25	-1.75	0
			75.2	0	3.25	2.75	-0.5	2.5	2.25	3.25	3.25	2.25				75.2	-2.75	0	3.25	-1.5	0	2.25	-3.5	0.25	-1.5
			75.24	1.25	4.5	2	-1.75	0.25	2	1.25	3.75	2.5				75.24	-2.5	1.5	2.5	-2.25	-3.5	0.25	-3	-2.25	-2.5
			75.28	-1.5	2	0	-1.75	-1.25	0.5	0	1.25	1.75				75.28	-2.75	0.25	-0.5	-0.75	-3.25	-3.75	-2.5	-3	-1.25
			75.32	-2.75	0.75	-0.25	1.5	0.25	-0.5	1.5	1	0				75.32	-3.5	-1.5	-1.5	0.5	-2.75	-4	-1.25	-0.5	-0.5
			75.36	-1.25	0.75	1.75	1.75	2	0.5	0.5	1	0				75.36	-3.5	-1.5	0	-3	-3.25	-1.5	-1.25	-0.5	0.25
			75.4	-1.75	0.5	4	1.5	0.75	0.5	-1.5	-0.5	0.25				75.4	-3.5	-0.75	1.25	-3	-2.25	-0.5	-1.5	-2.25	-1.5
			75.44	-2.25	-0.5	5.25	1.75	-1.25	2.25	-3.25	1.25	1.25				75.44	-1	-1.25	0.5	0	-1.25	0.75	-1.25	-1.75	-1.5
			75.48	0	0.5	2.25	-0.75	0.5	3.75	-0.75	2.25	1.5				75.48	0.25	-0.75	-0.5	0	-0.75	0.75	-1.5	-1.25	-2.25
			75.52	2.75	2.25	-0.25	0.25	1.5	2	1	2.5	2				75.52	0.75	0.5	-1.25	-1.75	-2.25	-2.5	-0.5	1.25	-3.5
			75.56	2.25	2	-2.75	1.25	3	0.75	2	2.5	2.25				75.56	0.25	2	-1.5	-3.5	-1	-0.5	1.75	3	-3.5
			75.6	3.5	2.5	-2.5	-2	3.75	0.5	0.5	2	2.25				75.6	0.25	-0.5	-1.25	-5	-0.75	0	2.5	4	-3.25
			75.64	2.5	1.25	-0.5	-1.25	1.75	1	0.5	1	2				75.64	-0.75	-3.75	1.25	-3.25	-3	-1.75	-0.25	2.25	-1
			75.68	4	-0.5	0.75	-1.25	-1.75	2	0.25	-0.25	2				75.68	-0.75	-5.75	2	-1.75	-5.5	-1.25	-4	-3.5	1
			75.72	3.5	1	-1.25	0	-0.5	0.25	2.75	-1	0.5				75.72	-1.75	-2.5	0.25	-1.25	-3.25	-1	-2.25	-4.25	0.25
			75.76	0.75	1.75	-3.25	4.75	1.25	-3.75	3.25	0.25	-2				75.76	-4	-0.5	-2.25	0.25	0.5	-3.5	-2.25	-1.5	1.25
			75.8	-2.25	2.25	-1	3.25	0.5	-5.5	1.25	-0.25	0.25				75.8	-3.75	-0.5	-2.75	-1	0.5	-5.25	0	-3.25	4.5
			75.84	-3.25	2	-0.75	2.5	0	-2	0.75	-2.75	2.25				75.84	-2.25	1.75	-3.5	-0.5	-0.75	-3	1.75	-7	4.75
			75.88	-2	-0.5	-2	1.75	-0.5	1	-1	-1.75	3				75.88	-1.25	-1.5	-2.75	1.75	-2	-0.5	1	-5.25	2.75
			75.92	0.25	-1.5	-1.25	1.5	0.75	2	0.75	1.5	2.5				75.92	0	-2.75	-1.25	2.75	-0.25	1.25	2	1.5	0.5
			75.96	4.25	2	0	0.5	0.75	2.25	3.5	2.5	2.25				75.96	3	-1	-0.75	1.25	0.25	-0.5	-0.5	4.5	1.25
			76	4.25	3	0.25	-0.5	0.75	1.75	4.75	0.25	0.75				76	1	-1.5	-2.5	-2.5	-0.75	0	-1	1.25	1.75
			76.04	2.25	4.75	-1.5	-0.5	2	2.75	3.25	0	-1.75				76.04	-2.25	-1	-3.75	-4	-0.75	0.25	1.75	-1.25	-1
			76.08	0.5	4	-1	0.75	2	2	2	3.5	-0.75				76.08	-2	0.75	-3.5	-2.5	0.75	-0.25	2.25	0.25	-3.25
			76.12	0	0.5	0.75	0.75	1	-0.25	3	5.25	1				76.12	-1.25	-0.5	-1.75	-1	2.5	0	1.5	0.25	-4.25
			76.16	0.25	-3.25	0.5	0.75	-1.75	1.5	1.25	1.75	1				76.16	-0.75	-2.75	-0.25	-2.5	1.25	0.5	-1.75	-1.5	-3.25
			76.2	0.5	-0.75	-0.5	2.25	-3.5	1	-2	-0.25	-0.75				76.2	0.25	-0.25	-0.25	-0.5	-3	1.25	-4	-2	-1.75
			76.24	-0.25	0.75	2.5	0.75	-2	2	-2.75	-0.5	-2.25				76.24	0.25	1.5	0.5	-0.5	-5.25	3.5	-1.5	-4.25	-1.5
			76.28	0	3	3.5	-1.75	-0.5	1.5	0.25	-1	-1.25				76.28	1.5	0.75	-0.75	-1.25	-2	2.25	-1.5	-4	-1.5
			76.32	-1	3.75	0	-0.25	0.25	0.25	2.75	0.5	0.25				76.32	0.5	1.5	-2.75	0.75	-0.75	2	-1.25	-1.5	-1.5
			76.36	-1.25	2	-0.25	2.25	0	-1	2	2.75	-1.25				76.36	-0.5	2.5	-1.25	2	0	0.75	-0.75	0	-2.25
			76.4	0	-0.75	0.25	3.75	0.25	-1.25	0.75	2.5	-2.75				76.4	2	-1.25	-2.75	3.5	1	-2.5	-3.25	0.75	-2.5
			76.44	2.75	1	2.75	3.5	1.5	0.5	-1	0	-1.25				76.44	2.25	-0.5	-3.75	2.25	2	-3.75	-4.25	3.5	-2.25
			76.48	4.75	3.75	2	1.5	4.25	1.5	-1.75	-1.25	1.75				76.48	1.25	-0.5	-2.25	0.25	1.75	-3	-3	2.5	-1.25
			76.52	3.75	1.5	3.25	-1	2.75	2.25	-0.25	1.75	2.25				76.52	-1.5	-2.5	-0.75	0	-1.25	-2.5	-3	-1.75	-0.75
			76.56	1.75	-0.5	1.75	-1.5	0	2.5	0.25	3.5	0.5				76.56	-2	-1.5	0	-1.75	-4.5	-2.75	-3.5	-3.25	0.25
			76.6	-0.5	-3.75	2	0.25	-0.75	1.75	0.5	2	-1.25				76.6	-1.25	-3.5	1.75	-1.75	-5	-1	-1	-0.5	0.75
			76.64	-1.5	-2.5	0.5	2.5	-0.25	2	1.75	0.75	0				76.64	-2.25	-2.75	0	-0.5	-2.5	2.75	-1.5	2	0.25
			76.68	-2.75	1.5	-1	4	0	0.75	3	-0.25	1.75				76.68	-1.75	-0.5	-3.25	2	-1.75	2	-0.5	0.5	1.25
			76.72	-0.75	1.75	-1	5	1.25	-0.5	1.75	-0.75	1.25				76.72	-1	0.25	-3.75	2.75	-2.75	-1	1.25	-1	-0.25
			76.76	1.25	1.75	-0.25	2.5	2.75	-1.5	1.25	-4	1				76.76	0.75	1	0.25	0	-0.75	-3.25	0.25	-5.5	-0.25
			76.8	1	-1	1.75	-1.25	2.5	-1	-0.5	-1	0.75				76.8	0.25	-1	1.25	-2.25	-0.25	-4	-4.75	-6	0.75
			76.84	0.75	-1.5	0.75	-3.25	0.25	-1.25	0	-1.25	-1				76.84	-0.25	-2.5	0.25	-2.5	-1.5	-3.5	-4.75	-5.5	-0.5
			76.88	1.25	-0.5	1.25	-2.5	0.25	-2	2	1.75	-0.75				76.88	-2.75	-1.75	0.5	0.5	-0.5	-0.5	-0.25	-3.5	-2
			76.92	1.5	-0.5	0.5	-2.75	0.5	-1.75	0.75	3.25	0.5				76.92	-4.25	-0.25	0.5	-1.25	-1	-0.25	0.25	-3.75	-1.75
			76.96	2.75	-0.5	-0.75	-1.25	1.25	0.75	-1.75	3.25	0				76.96	-2.25	-0.5	-0.75	-2.75	-0.75	1.25	-1	-2	-1
			77	0.75	-0.25	-1.5	-2	2.25	1.75	-4.75	0.25	-2.75				77	-0.25	-2.5	-1.75	-3.5	-1.5	-3	-4.5	0	-4
			77.04	0.25	0.25	-0.5	-1.75	2.25	2.75	-1.25	-1.25	-2.75				77.04	2.25	-3	-1.5	-2.75	-1.75	-1.25	-4.75	0	-5.5
			77.08	0.75	1.75	1.25	1	0.75	2.25	2	-2.25	0.25				77.08	2.5	1.75	2	-2.25	0	2	-0.75	-2.75	-1
			77.12	0.25	-0.25	0.25	2.25	3.25	2.25	3	-3.25	0.25				77.12	1	2.25	2.5	-3	1.5	3.5	2.5	-3	0.25
			77.16	-2	-1.25	-0.25	4	3.75	3	1	-1	-0.25				77.16	-0.75	-0.5	0.25	-0.5	1.5	1.25	2.5	-2.5	-0.5
			77.2	-1.75	1.75	-3	2.75	0	2.25	1.5	1.25	0.75				77.2	-0.75	-1	-6	2.5	0.5	-1.25	3.5	-0.5	-1.5
			77.24	0.5	2	-1.5	0	-1.75	1.5	0	3.25	-0.75				77.24	0	0.5	-6.25	0.75	1	-1.25	-1.25	1.75	-0.5
			77.28	3.5	2	2.5	0.5	1.75	0.5	0.5	3.75	-2				77.28	-0.25	2.25	0	0	3.5	-2.25	-4.5	3.25	-2
			77.32	2.75	-0.75	2.75	1.5	1.25	-1.25	0.75	4.25	-1.5				77.32	-1	0.75	2.75	0.25	0.25	-2	-4	2	-2.5
			77.36	-1	-2.25	0.75	2.25	0.25	0.5	-0.75	2.5	0.5				77.36	-3.25	-1.5	0.75	2	-3.75	0.75	-2.25	0.25	-1.25
			77.4	-1.75	-1.25	1.5	1	0	0.75	-1.5	-0.5	3.75				77.4	-2.5	-1.5	-1.5	-0.75	-6.75	0	-2	-2.5	0.75
			77.44	-1	1	2.25	2	-0.25	0.5	-0.75	-0.25	4				77.44	-2.25	-1	-4	-1.25	-3.75	-1.75	-4.75	-1.25	-1.5
			77.48	-0.5	2.25	1.5	1.5	-1.75	1	1.75	-0.75	0.75				77.48	-3.5	0.5	-2.25	-2.25	-1.25	-4.75	-1	-1.5	-0.75
			77.52	0	2.75	1	4	-0.25	1	-0.5	-1.25	-2.25				77.52	-1.75	1.25	0.25	-1	1	-3.25	0.5	-3	0.25
			77.56	0	-0.5	-0.5	-1.5	1.75	-0.25	0.5	-0.75	-0.5				77.56	0.75	-0.25	-1.5	-3.75	1.5	-0.75	0.75	-2	0.75
			77.6	1.75	-4.5	-0.25	-3.75	1.75	-3.25	0.75	2	4				77.6	1.75	-3.25	-2.75	-4.5	-0.25	-2	0.25	1.25	0.75
			77.64	2.5	-2.75	1.75	-1	0.75	-2.5	1.5	2.5	2.75				77.64	0.75	-2.25	1.25	-1.75	-2	-2.25	1.5	2.5	0
			77.68	1.75	1.75	2.75	1	-2.25	-2.75	-0.75	2.5	-1.75				77.68	1.5	-0.5	6	-2	-3.75	-4	-2.75	2.5	-1.25
			77.72	1.5	2	3	0.5	-2.25	-2.5	-1.75	0.5	-4				77.72	0.75	-0.25	4.75	-2	-1.75	-3	-4	-0.75	-3.75
			77.76	0.5	1.75	2.25	2.5	-2	-3.25	0.5	-1.75	-3				77.76	-1	0.25	1.25	-0.5	-1.25	-0.25	1	-2.5	-4.25
			77.8	-0.5	0.5	-1	2.25	-2.25	-3	3.25	-2	0.75				77.8	-1	-0.25	-4.25	-0.25	-0.5	1	3.25	-2.75	2.25
			77.84	-1	-1.75	-2.75	3.75	-0.25	-4.5	1	0.75	0				77.84	-0.75	-1	-3.5	2.25	0	-2	1.75	-2	4
			77.88	1.25	0	-1.5	3.25	-0.25	-3.75	0	1.25	-0.5				77.88	-0.25	-1	-1.5	2.25	-1.75	-4.5	0.5	-0.25	3.5
			77.92	3	1.5	1.25	0.75	-0.75	-2.5	-0.5	-1	1.5				77.92	1.75	-2.25	-0.5	3.25	-2.25	-6.25	-2.5	-0.5	2.25
			77.96	3	2.75	0.5	2	-0.5	-1.5	-1.25	-3	2.75				77.96	2.25	-3	0	4.25	-2.25	-5.25	-2.75	-0.25	1.75
			78	3.5	1.75	-0.75	3.25	0.25	2.25	-2.5	-4.25	1				78	1.5	-3	0.5	3.25	-0.75	0.75	-2.5	-2.5	0
			78.04	3	-0.75	0.25	1.5	1	1.25	1	-3	-1				78.04	0.25	-1	2	2.25	1	1.5	1.25	-2.25	-1.5
			78.08	0.25	0.75	3	1.5	0.75	-1	1.5	-1.75	0.25				78.08	-1.5	2.5	2.25	0.25	0.25	-0.25	1.75	-0.25	-0.25
			78.12	-1.25	0	2	3.5	-3.25	0	-0.25	-3	2				78.12	-2.5	0.5	-0.25	1	-1.5	-1.5	-2	-1.5	0.5
			78.16	-3	-4.75	1.75	0	-3.25	2.25	-0.75	-1.5	-2				78.16	-2.25	-2.75	-0.75	-1.75	-1.75	1.25	-3.75	-1.25	-2.25
			78.2	1.25	-4.5	-1.5	-3.75	0	2	2.25	1.75	-3.5				78.2	2.5	-0.75	-0.25	-5.5	-0.75	2.75	-3.75	0.75	-0.75
			78.24	3.25	-1.75	-2.75	-4	2.25	2.5	4.5	2	-1				78.24	3.5	0.5	-2.75	-4.75	-0.25	2.25	-1.25	1.5	0.25
			78.28	1.25	-0.75	-3.5	0	3.75	2.5	5.25	-0.75	0.25				78.28	0.5	-0.5	-6	-2	-0.5	1.75	1.5	-0.25	-1.75
			78.32	-2.25	-1.5	-2.25	0.25	1.5	-0.25	2.5	-2.75	0				78.32	-2	-2.25	-2.25	-1.25	-1.5	1	2.5	-3	-1
			78.36	-4.25	-2.5	-3	-2	-1.75	-0.5	1.5	-1	0				78.36	-4	-4.5	0	-1.25	-3	0	5.5	0	0.75
			78.4	-5.25	-3.25	-3	0.25	-1.75	1.75	-2	1.75	-0.5				78.4	-5.25	-4.75	-1	-0.5	-2.25	-1.25	3.75	1.75	1
			78.44	-3	-0.5	-2.75	-0.5	-2.25	0.5	-2	0.5	-0.25				78.44	-2.25	-2.5	-1.5	-0.25	0	-1	-1	1.5	-1
			78.48	-1.75	0.5	0.75	-2.5	-1.25	-1	-1.5	-0.25	-1.25				78.48	-1.5	-0.25	-1	0.25	1.5	-1.25	-2	0.25	-4.5
			78.52	-1.5	1.5	2.75	-0.5	-0.5	1	0.5	2.75	-1.5				78.52	-2.5	0.5	0.75	0.75	1.25	-1.75	0.75	0.25	-3
			78.56	-0.25	1	0.75	1.5	-0.5	0.5	-0.5	1.75	-0.5				78.56	-0.5	-0.5	1.25	0	2	-0.25	-1.5	-1.5	1
			78.6	3.75	-1	-1.25	0	-1.5	-0.75	-2.5	1.75	0.5				78.6	0.5	-1	1	-1.75	-0.25	1	-4.75	-0.75	4.25
			78.64	1.75	-5	-1.75	0.75	-2.5	-1	-2.75	2.75	-0.5				78.64	-2.25	-2.5	-0.25	0	-1	-1.75	-2.75	1.5	-0.25
			78.68	1	-6	0.25	-2	-1.75	-1.25	-1.75	-2.25	0.25				78.68	-2.5	-3.75	-0.25	-0.75	2.25	-3	-1.75	-0.75	-2.25
			78.72	0.5	-5	-0.75	-1.25	0.75	0.5	-3	-3	2				78.72	0	-4.5	-2.25	-1.5	2.75	0.75	-1.75	-1.75	-0.25
			78.76	-2.25	-3	-2.5	-1	1.5	1	-0.75	-0.5	1.5				78.76	1	-3	-2	-2.25	-0.5	4	-0.75	-1.5	0.25
			78.8	-5.25	0.5	-4.25	-1.25	-1.5	1.25	1.75	-0.25	-0.25				78.8	-0.5	-0.75	-3.25	-3	-2	5.75	0.5	1	0
			78.84	-4.25	2.25	-4.5	-0.25	-0.25	0.5	3.5	-2.25	-2				78.84	-1.25	1.5	-2.75	-1.5	-0.5	3.5	3	1	0.5
			78.88	-1.25	1.75	-0.25	1	2	-0.75	3.25	-2.75	-0.5				78.88	-1.25	0.25	0.5	-0.75	0.75	0.25	4	-0.5	2.75
			78.92	-0.5	-2	0.25	-1	1	-5	0.5	0.75	-2				78.92	-1.25	-1.5	3	-1	1	-4.5	0.25	2.75	2
			78.96	1	-2.25	-3.5	-2.25	-0.25	-5.5	0	3.5	-4.75				78.96	0.25	-1	1	0.5	1.75	-5	-0.75	5.5	1.25
			79	2	-1.25	-4	-3.5	-1.5	-2.25	0	2.75	-2.75				79	1.5	0.5	0	0.25	-0.75	-3.25	-1.25	2.5	0.25
			79.04	0.75	-1.25	0.75	-2.25	-1.75	-1.75	-3.5	2.25	-0.75				79.04	-0.25	0.5	1.75	-0.75	-1.75	-1.25	-2	0.5	0
			79.08	-1.25	-0.5	0	-2.25	-0.5	-1.75	-2.75	0.25	-4.25				79.08	-1.5	-0.5	-0.25	-2.75	-1.25	-0.75	0	-0.75	-3.75
			79.12	-5	1.75	-2	-2	-0.75	-1.25	1.25	-0.75	-4.5				79.12	-3	-2	-2.5	-3.25	-1.75	0	0.25	-1.25	-4.5
			79.16	-5	1.75	-2.25	-1.25	-1	-1.5	1.25	-4.25	-1.75				79.16	-2.25	-0.25	-1.75	-2.5	-3.25	-1.75	-2	-2.25	-4.25
			79.2	-0.5	1.5	1	0.5	-1	-0.5	0.25	-3.25	0				79.2	-2.5	1.25	-0.5	-2.25	-2.5	-2.25	-2.75	-0.75	-6
			79.24	1.5	0.5	3	-0.25	-2.25	-1	-3.25	0	0.25				79.24	-3.75	1	-0.5	-4.75	-1.75	-1.5	-2	1.25	-3.5
			79.28	1.25	0	0.75	-1	0.25	-2.5	-4	-2.25	2.5				79.28	-1.5	1.5	-0.5	-3.25	0.5	-2.25	-1.5	-3	0.5
			79.32	1	-0.5	-2.5	-1.75	1.5	-0.5	-4	-3.25	0.75				79.32	0	-1.5	-1.75	-2.25	2.75	-0.75	-0.25	-5	2.25
			79.36	-1.75	-1.75	-3.25	-2.5	2	-0.5	0	-1.5	-2.5				79.36	-1.25	-2.75	-3.75	1	1.25	-0.25	-1	-1.25	1
			79.4	-3	-1.25	-2.75	-2.75	1.25	-1.5	2.25	0.25	-2				79.4	-2	-2.25	-4.5	-1	-2	-0.5	-0.25	-0.25	1
			79.44	-0.75	1.25	-2.25	-4	0.25	-0.5	-1	1	-1.5				79.44	-0.25	-0.25	-3.75	-5	-2	-0.25	-0.25	0.75	-1.25
			79.48	-2.25	0	0.5	-3	0.5	0.75	-4	-0.25	-1				79.48	0.5	-0.5	-1.25	-4	-2.5	0.5	0.5	-0.75	-1
			79.52	-4.5	0.25	1.25	0	-2.25	0	-3.5	-3.25	1.5				79.52	-0.5	0.25	-0.25	0.25	-4.75	2	0.75	-3.25	0.75
			79.56	-1.75	2	0.5	-0.75	-1.25	-2.75	-2	-4.5	2				79.56	1.75	2	0.5	0.5	-2.5	0.25	-1.25	-2.25	1.5
			79.6	0.75	0.75	0.5	-1	1.25	-2.25	-1	-3	-0.75				79.6	1.75	0.5	0.25	-1.25	-0.5	-1.75	-3	-2	-1.25
			79.64	1.25	-1.75	-0.5	-0.25	2.25	0	0	-3	-4.25				79.64	1.25	-1.5	0	-2	1.5	-0.25	-1.75	-1.5	-5.75
			79.68	-1	-3.5	-2.75	1	3.75	2.25	-0.5	-1.25	-3				79.68	-0.25	-3	-1.25	1.25	3.25	1.75	-1	-0.5	-4.5
			79.72	-4.25	-2.75	0.25	-2	2	0.25	-2.75	1.25	-0.5				79.72	-4.5	-1.25	-1.5	-1.75	2.25	1.75	-1	0.75	0
			79.76	-3.75	-2.25	2.75	-3.5	-0.5	-2.75	-2.25	-1.25	-2.25				79.76	-5.5	-2.25	-1	-4.75	0.5	0	1.25	0	-0.25
			79.8	-2.5	-2.75	1.25	-1.5	-1.5	-2.5	-1.75	-1	-1.75				79.8	-5	-2.5	-0.25	-4	-1.25	-2	-0.25	0.75	-2.75
[truncated: 3,164 more rows]
