# Supplementary material for: Conserved allosteric inhibition mechanism in SLC1 transporters
Source: eLife. 2023 Mar 1;12:e83464. doi: 10.7554/eLife.83464 (PMC10017108; doi:10.7554/eLife.83464)
Supplement: Figure 10—source data 1. [file elife-83464-fig10-data1.xlsx]

## Sheet: Sheet1
Figure 10 original data		rASCT2WT-compound#302
Figure 10C	1mM Ser only control (transport condition)																			Figure 10D	1mM Ser+100uM #302 (transport condition)																			Figure 10E	100uM #302 (transport condition)
	Time (ms)	Trace#1	Trace#2	Trace#3	Trace#4	Trace#5	Trace#6	Trace#7	Trace#8	Trace#9	Trace#10	Trace#11	Trace#12	Trace#13	Trace#14	Trace#15	Trace#16				Time (ms)	Trace#1	Trace#2	Trace#3	Trace#4	Trace#5	Trace#6	Trace#7	Trace#8	Trace#9	Trace#10	Trace#11	Trace#12	Trace#13	Trace#14	Trace#15	Trace#16				Time (ms)	Trace#1	Trace#2	Trace#3	Trace#4	Trace#5	Trace#6	Trace#7	Trace#8
	0	14.8529	8.06665	12.3774	12.9918	10.6988	11.5694	11.1257	11.5793	12.4172	13.1348	11.8616	11.2893	12.7594	9.92422	11.7505	10.6046				0	-0.86663	-0.97637	0.48859	0.92037	-0.58989	0.54734	-0.30396	-1.2136	-1.40673	-1.01652	-0.38898	-0.15217	-0.1717	0.18794	-1.06111	-0.92996				0	3.81522	3.57446	3.43328	3.33934	4.53808	2.24515	5.02416	2.39309
	0.1	14.5857	8.97542	12.7905	12.9262	11.0071	10.7873	11.2211	11.5535	13.1842	12.0809	12.8052	11.3653	12.6277	10.0745	11.7037	10.6712				0.1	-0.325	-1.0547	0.09816	0.7384	-0.77573	0.58316	-0.0638	-0.68382	-1.18411	-0.92138	0.21969	0.23638	-0.15306	-0.4753	-0.84486	-0.82279				0.1	3.9187	4.65429	3.0545	3.43077	4.53993	2.43021	4.98812	2.95406
	0.2	13.9982	10.0749	12.3962	12.4336	11.3443	9.47769	11.8056	11.3956	13.1929	11.2559	13.2455	11.5523	12.4647	9.46555	11.7488	10.8928				0.2	0.10509	-1.09979	-0.50151	0.51578	-0.52933	0.3433	0.29838	-0.20603	-1.05745	-0.93457	0.66712	0.80308	-0.0327	-1.17045	-0.57831	-0.84485				0.2	4.04844	5.59107	2.82659	3.34123	4.72913	2.50405	4.85733	3.50599
	0.3	13.0793	10.9865	11.3564	11.5914	11.7121	8.36094	12.529	11.2198	12.7601	11.219	12.818	11.8674	12.3493	8.74995	11.5516	11.1016				0.3	0.0806	-0.92074	-1.03582	0.52372	-0.01018	0.03321	0.62915	0.0796	-1.04696	-0.91021	0.78027	1.1193	0.20508	-1.41916	-0.04074	-0.65192				0.3	3.98963	6.17719	2.77935	2.88453	4.53389	2.8962	4.26171	4.12531
	0.4	12.2139	11.4084	10.574	10.788	12.3286	8.24614	12.6123	11.1496	12.4003	11.9006	12.2883	12.2835	12.2587	8.92745	11.1404	10.7343				0.4	-0.26509	-0.31625	-1.21059	0.68595	0.32416	-0.15241	0.65361	0.26546	-1.04147	-0.62403	0.61423	1.04947	0.47235	-1.00182	0.71919	-0.02592				0.4	3.58409	6.33537	2.6017	2.67765	3.85962	3.61741	3.15219	4.62877
	0.5	11.8374	11.4824	10.4772	10.5985	12.8524	8.96344	12.3335	11.0364	12.128	12.3118	12.2055	12.9299	12.1643	10.0752	11.0862	9.80534				0.5	-0.69707	0.42928	-0.85602	0.72124	0.32269	-0.54047	0.41346	0.40369	-1.08661	-0.10694	0.38333	0.89431	0.61431	-0.13809	0.99733	0.34299				0.5	3.09198	5.95467	2.14904	3.13555	3.48739	4.07903	2.20352	4.39247
	0.6	11.8107	11.5632	10.6566	11.2984	12.7372	9.48367	12.3193	10.9559	12.1013	11.7305	12.2685	13.5291	12.2878	11.3041	11.2851	9.41473				0.6	-1.12807	0.99215	-0.09603	0.52343	0.31847	-0.99252	0.51896	0.57457	-1.28896	0.52409	0.21573	0.76887	0.59043	0.74601	0.52944	0.03615				0.6	2.78512	5.24165	2.00611	3.61847	3.67613	4.1586	2.36776	3.69999
	0.7	11.7265	11.8967	10.5701	12.3781	12.3748	9.23508	12.3607	11.0519	12.3371	10.7	12.526	13.4095	12.6102	11.8764	11.108	10.2706				0.7	-1.34593	1.36653	0.66543	0.27763	0.54108	-0.93422	1.24055	0.68679	-1.24449	1.08958	0.05466	0.69957	0.49604	1.13847	-0.03644	-0.21375				0.7	2.74541	4.53449	2.72881	3.46695	3.74676	3.92291	3.89225	3.72661
	0.8	11.5721	12.3788	10.2435	12.9535	12.2615	8.72605	12.4568	10.9738	12.241	10.1412	13.1267	12.6402	12.8382	11.769	10.6762	11.4508				0.8	-1.26439	1.5065	1.11758	0.39465	0.79323	-0.70773	1.85854	0.34049	-0.46793	1.24354	-0.09602	0.74492	0.46546	0.89381	-0.10274	0.18999				0.8	2.76999	3.91876	3.96782	3.06764	3.38453	3.50668	5.67648	4.45816
	0.9	11.3043	12.8341	9.93563	12.729	12.2533	8.51805	12.8792	10.5126	11.5857	10.1598	13.4652	11.9562	12.8316	11.2881	10.506	11.7945				0.9	-0.91468	1.26978	1.18936	0.80725	0.86209	-0.97309	1.68767	-0.39935	0.47933	0.99966	-0.13827	0.6219	0.63914	0.4968	0.11431	0.85463				0.9	2.55599	3.52506	4.98845	3.17359	2.81063	3.46469	6.38358	4.78219
	1	10.6902	13.248	9.72032	11.9859	12.4453	8.72238	13.6054	10.0542	10.9358	10.3381	12.8757	11.6209	12.5059	10.7011	10.687	11.4752				1	-0.13035	0.59739	1.07385	0.81795	0.90856	-1.26622	0.97361	-0.75814	0.73602	0.82272	-0.12331	0.12516	0.95067	0.2773	-0.03989	1.36081				1	2.07784	3.48496	5.22083	3.82568	2.5661	4.03212	6.08197	4.53749
	1.1	10.1039	13.2182	9.47202	11.1526	12.9573	9.22438	14.7743	9.92926	10.6062	10.47	11.6587	11.5073	11.9807	10.4129	10.9786	11.1996				1.1	1.01474	-0.21827	0.86817	0.16239	0.92485	-0.90802	0.39922	-0.44589	0.49326	0.7919	-0.12095	-0.4618	1.14373	0.04076	-0.6432	1.79511				1.1	1.4851	3.74799	4.36374	4.50839	3.23746	4.71356	5.37773	4.53552
	1.2	10.2879	12.2722	9.13169	10.7326	13.1629	9.9471	16.143	9.91181	10.3413	10.5199	10.7726	11.624	11.5262	10.5831	10.9729	10.941				1.2	1.75831	-0.55647	0.52092	-0.56524	0.43412	-0.28792	0.27154	-0.02554	0.36232	0.54599	0.05368	-0.87249	0.97089	-0.41542	-1.15763	2.10707				1.2	1.10635	4.03835	3.05027	4.62703	4.36968	5.05331	4.44127	4.88944
	1.3	11.2492	10.8697	9.18734	10.8939	12.6601	10.9492	16.6864	9.92646	9.95044	10.4683	10.9125	11.8624	11.1953	10.8053	10.293	10.5864				1.3	1.26874	-0.20112	0.15966	-0.75614	-0.31319	-0.05161	0.40048	0.16895	0.53157	0.0185	0.26835	-1.13473	0.52605	-0.99295	-1.18216	2.00855				1.3	0.93592	4.10265	2.46881	4.18786	4.89293	5.24098	3.79969	5.16293
	1.4	12.4247	9.97955	9.95554	11.0497	12.0177	11.9451	15.9235	10.246	9.72362	10.3567	11.7072	11.6858	10.9893	10.9813	9.40791	10.793				1.4	-0.07956	0.19003	-0.0663	-0.29137	-0.44159	-0.08458	0.68351	0.35451	0.89915	-0.48195	0.02876	-1.1091	0.11694	-1.34407	-0.63316	1.40388				1.4	0.95288	4.08493	2.91244	3.89615	4.60656	5.57728	3.99445	5.34082
	1.5	13.3072	10.0153	10.9104	10.6717	11.8132	12.2276	14.3653	10.7932	10.0851	10.2667	12.5369	10.9851	10.9481	11.483	9.18546	11.8721				1.5	-0.97065	-0.07216	-0.15124	0.66049	0.09494	-0.11609	1.0402	0.90026	1.12681	-0.76378	-0.52925	-0.44875	-0.06842	-1.248	0.16372	0.42151				1.5	1.56356	4.0169	3.77478	4.07972	4.10635	6.08141	4.50066	5.5271
	1.6	13.4625	10.6902	11.4455	10.1688	11.932	11.4703	12.8101	11.2004	11.1038	10.2513	13.4385	10.5225	11.1794	12.2307	9.50366	12.9319				1.6	-0.98308	-0.75169	-0.12584	1.6058	0.77988	-0.24142	1.08616	1.62108	0.98055	-0.84286	-0.64704	0.60677	0.10067	-0.99838	0.62856	-0.64492				1.6	2.66864	3.82376	4.42963	4.38803	3.7449	6.59731	4.46328	5.38691
	1.7	12.7974	11.4122	11.1927	10.1657	11.9052	10.3051	11.8764	11.3346	12.2768	10.1777	14.2047	10.7964	11.7675	12.6989	9.80368	13.0698				1.7	-1.00112	-1.18182	-0.01556	2.00601	1.28776	-0.37059	0.76119	1.74077	0.5085	-0.84187	-0.07554	1.24026	0.6058	-0.93946	0.72476	-1.31901				1.7	3.57774	3.76182	4.40889	4.50919	3.38972	6.79387	4.04467	4.58447
	1.8	12.2648	11.9482	10.154	10.6026	11.6033	9.70087	11.6659	11.4562	12.9079	9.99541	14.5328	11.4553	12.349	12.751	10.0451	12.34				1.8	-1.53475	-1.26376	0.19103	1.68888	1.26835	-0.23098	0.5262	1.1269	-0.39072	-0.62828	0.51699	1.10488	1.02069	-0.9246	0.8661	-1.35467				1.8	3.97332	4.04005	3.93235	4.17967	3.15791	6.3531	3.91317	3.63274
	1.9	12.5042	12.563	9.12243	10.7917	11.4638	9.92978	11.8172	11.8377	12.8269	10.1919	14.4681	11.8619	12.3759	12.7273	10.3042	11.4846				1.9	-1.91449	-1.22295	0.39158	0.85098	0.59007	0.14019	0.48649	0.39693	-1.28448	-0.17578	0.6168	0.52519	1.09213	-0.65376	0.97827	-0.88347				1.9	4.16426	4.5466	3.69914	3.53742	3.53524	5.29503	4.12121	3.17996
	2	12.7753	13.0622	8.85493	10.4792	11.744	10.5148	11.9814	12.3229	12.3142	11.1428	14.0687	11.7688	11.9764	12.975	10.6536	11.205				2	-1.52826	-0.99831	0.41671	-0.04081	-0.14901	0.49953	0.28092	0.00814	-1.29884	-0.08827	0.50079	-0.08298	0.9658	-0.23118	0.69649	-0.18512				2	4.37174	4.93974	3.74231	3.23901	4.34993	4.00789	4.36978	3.16808
	2.1	12.4886	12.8492	9.23371	10.2608	12.1838	10.7786	12.0768	12.5203	11.7405	12.0121	13.4538	11.4343	11.8215	13.5053	11.1912	11.3501				2.1	-0.75053	-0.47856	0.24187	-0.50263	-0.24643	0.65684	-0.02287	0.00381	-0.60252	-0.55283	0.36564	-0.3365	0.67098	-0.10083	0.24274	0.41237				2.1	4.17573	5.16307	3.592	3.49633	4.95616	3.12594	4.46106	3.38359
	2.2	11.9712	12.0813	9.64895	10.3429	12.4768	10.5185	12.2505	12.4252	11.5374	11.7817	12.7864	11.233	12.1904	13.7987	11.5714	11.3226				2.2	-0.4261	0.31634	-0.07742	-0.27764	-0.02411	0.6066	-0.10878	0.1572	-0.22196	-0.78832	0.0509	-0.19205	0.28108	-0.44999	0.27195	0.83601				2.2	3.52167	5.24538	3.23305	3.95831	5.02458	2.90223	4.04264	3.70904
	2.3	11.7802	11.7553	9.70894	10.3917	12.7001	10.1245	12.4997	12.2413	11.7412	11.0724	12.1673	11.446	12.7354	13.2955	11.1172	11.0478				2.3	-0.62919	1.21112	-0.33615	0.40488	-0.23835	0.25948	-0.14948	0.4449	-0.4348	-0.25325	-0.26469	-0.1062	0.00954	-0.72194	0.88686	1.24674				2.3	3.21575	4.84072	3.40221	4.12435	4.79995	3.07728	2.80211	3.96431
	2.4	12.0722	12.4692	9.61652	10.5465	12.9084	9.89621	12.469	11.9762	11.9379	11.1308	11.8198	11.8968	13.0855	12.3184	10.0327	10.9444				2.4	-0.70576	1.76737	-0.24517	0.79267	-0.57275	-0.51283	-0.31958	1.01631	-0.63892	0.59474	-0.28076	-0.33835	-0.15558	-0.26803	1.32327	1.77591				2.4	3.55918	4.31719	4.2264	3.71286	4.51196	3.48703	1.33493	4.19592
	2.5	12.6119	13.3964	9.74722	11.0777	12.9167	9.83751	12.0068	11.4731	12.0949	11.7265	11.9205	11.9738	13.1958	11.4927	9.31829	11.2948				2.5	-0.43082	1.58522	0.11841	0.58198	-0.34635	-1.2769	-0.39418	1.49043	-0.47912	0.89848	-0.03327	-0.71047	-0.20564	0.59346	1.00184	2.43278				2.5	3.89438	4.31941	4.60932	3.10585	3.96994	3.67949	0.70015	4.36907
	2.6	12.9961	13.4816	10.1076	11.6656	12.728	9.97131	11.4985	10.7887	12.5536	11.7454	12.3212	11.6189	13.1624	10.7201	9.47	11.8543				2.6	-0.19636	0.8202	0.43244	0.2575	0.19537	-1.49596	-0.36432	1.299	-0.24713	0.54997	0.51418	-0.95931	-0.05633	1.03975	0.12964	2.80897				2.6	3.60264	4.4694	4.18085	2.92598	3.4212	3.4573	1.35011	4.40404
	2.7	13.0076	13.2161	10.6403	11.7601	12.3843	10.1935	11.3776	10.4987	13.2393	11.2149	12.6701	11.5688	13.0853	9.90304	10.1373	12.0838				2.7	-0.33487	-0.01138	0.54712	0.00484	0.50356	-1.12972	-0.27999	0.84184	-0.19306	0.20145	1.26118	-1.04279	0.08738	0.8955	-0.66539	2.42384				2.7	2.60795	4.62792	3.99796	3.12397	3.62753	3.40095	2.84899	4.46171
	2.8	12.8876	13.4668	11.394	11.3036	11.876	10.0574	11.6591	10.9748	13.4836	10.9075	12.6012	12.184	13.1297	9.60568	10.6951	11.9379				2.8	-0.64714	-0.3938	0.53956	-0.37932	0.29154	-0.47669	-0.04163	0.92343	-0.05969	0.30796	1.75111	-1.03831	-0.0374	0.46871	-0.82375	1.44863				2.8	1.55671	4.96407	4.51206	3.2565	4.32329	3.76486	4.07536	4.41764
	2.9	13.2005	13.6825	12.1576	10.8296	11.431	9.57045	11.98	11.7387	12.9019	10.9251	12.2349	12.8851	13.3548	10.1862	10.8873	11.9185				2.9	-0.7199	-0.19194	0.5163	-0.7151	-0.49695	0.01198	0.0375	1.28261	0.45511	0.73051	1.76968	-0.90848	-0.13444	0.08053	-0.39612	0.43722				2.9	1.39322	4.95742	4.86763	3.30569	4.27752	4.3034	4.3574	4.15949
	3	14.072	12.9222	12.5214	10.6154	11.4076	9.32749	12.0327	12.0887	11.936	10.7929	12.0704	13.0619	13.5105	11.1088	11.1735	12.0697				3	-0.58331	0.23671	0.45346	-0.6761	-1.33475	0.00442	-0.1866	1.28311	1.15765	0.97828	1.44992	-0.69584	0.25497	-0.06189	0.01111	-0.25684				3	2.30297	4.51553	4.38365	3.43895	3.38492	4.64435	4.09559	3.91393
	3.1	14.7681	11.5207	12.4305	10.1625	11.9362	9.46944	11.9686	12.0024	11.1562	10.163	12.2364	12.8521	13.2994	11.606	11.9758	11.7613				3.1	-0.66031	0.52337	0.32371	-0.38733	-1.35061	-0.30642	-0.19523	1.08019	1.50575	0.71669	1.04674	-0.69798	0.73924	-0.00626	0.23596	-0.6241				3.1	3.64019	4.12577	3.59978	3.88305	2.75136	4.36859	3.72019	3.61627
	3.2	14.4142	10.6275	12.0536	9.13281	12.639	9.58875	12.046	12.0084	10.6798	9.43735	12.5013	12.5126	12.7876	11.3556	12.9034	10.7463				3.2	-1.08012	0.49	0.27802	-0.35748	-0.41838	-0.35831	0.32196	0.94916	1.12127	0.13181	0.70766	-1.00858	0.59947	0.2795	0.53614	-0.67977				3.2	4.55292	3.75273	3.4358	4.77949	2.80504	3.70157	3.4959	3.22454
	3.3	13.0058	10.6483	11.4817	8.02008	12.8921	9.44044	12.1598	12.0996	10.4271	9.28618	12.7654	12.0615	12.2984	10.7894	13.4086	9.71384				3.3	-1.34646	0.1261	0.38363	-0.71756	0.5565	0.07401	1.00725	0.70909	0.29201	-0.27044	0.33551	-1.22637	0.00775	0.82071	0.71407	-0.22404				3.3	4.5907	3.35891	3.94546	5.65395	3.13189	3.57939	3.92403	3.3316
	3.4	11.4731	10.9911	10.8044	7.54594	12.4122	9.08016	11.893	11.5379	10.5688	9.38262	13.1874	11.6202	11.8944	10.6991	13.2319	9.37255				3.4	-1.1292	-0.42297	0.36131	-0.77744	0.90364	0.65642	1.33892	0.24727	-0.43755	-0.24966	-0.15449	-1.12218	-0.45305	1.08555	0.40173	0.60156				3.4	3.95027	3.4482	4.56707	5.98459	3.42765	4.33448	4.78854	4.10927
	3.5	10.8339	11.3083	10.1658	7.83739	11.6915	8.66	11.2045	10.2291	11.0104	9.07154	13.756	11.2934	11.4654	11.0328	12.5962	9.60813				3.5	-0.76731	-0.81734	0.04057	0.00919	1.03222	0.91635	1.26818	-0.31	-0.85779	-0.23883	-0.60403	-1.01573	-0.66985	0.68829	-0.07995	1.21195				3.5	3.09271	3.89705	4.78566	5.97629	3.50986	5.06791	5.17706	4.68044
	3.6	11.3151	11.8173	9.89003	8.54121	11.4979	8.52479	10.7617	8.94825	11.1763	8.55603	14.0699	11.0718	11.2298	11.3178	12.1219	10.0094				3.6	-0.61396	-0.60809	-0.257	1.00196	1.27396	0.68044	0.90466	-0.88536	-0.87128	-0.4791	-0.72509	-0.98138	-0.71891	0.25667	-0.11893	1.39351				3.6	2.49381	4.05641	4.33907	5.95398	3.40048	4.89103	4.81535	4.43704
	3.7	12.3466	12.2886	10.3036	9.35938	11.7367	8.82088	11.0467	8.42273	11.1538	8.3866	13.9305	10.9272	11.479	11.5452	11.7535	10.2864				3.7	-0.71732	0.14875	-0.14871	1.27043	1.127	0.3237	0.30091	-1.1586	-0.32961	-0.37816	-0.44678	-0.57817	-0.54928	0.52081	0.26931	1.27745				3.7	2.34013	3.80888	3.61366	5.5608	3.5707	4.0812	4.13664	3.81922
	3.8	13.1789	12.275	11.2642	9.9842	11.7242	9.13848	11.7047	9.01211	11.6536	8.65973	13.5619	10.9758	12.0256	11.6845	10.9551	10.2398				3.8	-0.95162	0.7603	0.12234	0.91219	0.59794	0.18324	-0.09701	-0.83586	0.47333	0.15992	-0.01604	0.22429	-0.22902	1.11598	0.44649	0.92017				3.8	2.34178	3.6793	3.21947	4.44993	4.03751	3.53282	3.59863	3.18546
	3.9	13.2097	12.1895	12.2814	10.4114	11.4672	9.34725	12.2943	10.3408	12.2902	9.1208	13.041	11.5296	12.192	11.8695	10.03	9.98383				3.9	-1.05883	0.72285	0.22074	0.52969	0.3909	0.04257	0.03909	-0.21001	0.85976	0.42225	0.35289	0.95005	0.2552	1.10159	0.02305	0.51692				3.9	2.22205	4.09377	3.2579	3.27423	4.24566	3.66132	3.49497	2.47273
	4	12.3749	12.4954	12.8491	11.0224	11.2895	9.69574	12.6082	11.5067	12.0167	9.55125	12.4839	12.5159	11.4918	12.4594	9.79638	9.90986				4	-1.05528	0.10137	0.14364	0.34923	0.753	-0.2384	0.28913	0.2874	0.70949	0.21115	0.67506	1.11961	1.03155	0.46266	-0.61874	0.22549				4	2.15198	4.75185	3.54182	2.90116	4.18866	4.26964	3.74279	2.22234
	4.1	11.4582	12.6583	12.6716	11.5744	11.1105	9.95662	12.2213	12.0148	11.2077	9.91719	12.3834	13.2927	10.4909	13.1331	10.3006	10.2567				4.1	-1.22569	-0.71554	-0.17444	0.12947	1.4514	-0.29706	0.01219	0.5537	0.5416	-0.16981	0.99736	0.50571	1.69289	-0.11159	-0.87917	0.0995				4.1	2.45584	5.03286	4.01822	2.97054	4.12241	4.72793	4.05794	3.01481
	4.2	11.2695	12.2343	11.7296	11.6283	11.1375	9.83555	11.3756	11.9129	11.1321	10.3474	12.8344	13.3006	10.2727	13.3673	10.7798	10.986				4.2	-1.31107	-1.2296	-0.59592	-0.31165	1.91301	0.07583	-0.75663	0.78301	0.56435	-0.60222	1.21748	-0.49109	1.74135	-0.27612	-0.65713	0.19258				4.2	3.0201	4.7291	4.3703	2.40765	3.97733	4.5144	4.21715	4.0761
	4.3	11.6406	11.8831	10.4251	11.5764	11.4694	9.57024	11.3083	11.602	11.885	10.5834	13.1803	12.6347	10.9205	13.1217	10.7706	11.798				4.3	-0.74005	-1.08472	-0.59493	-0.76389	1.47095	0.36949	-1.36042	1.13834	0.43705	-0.99993	1.18022	-1.10846	1.44497	-0.08762	-0.22135	0.30419				4.3	3.33304	4.21044	3.97628	1.38959	3.98627	3.98292	4.25653	4.21006
	4.4	12.104	12.0855	9.49884	11.6008	11.6498	9.49585	12.3678	11.3681	12.5788	10.1363	12.7796	12.1516	11.735	12.4116	10.4897	12.4962				4.4	0.38923	-0.50456	0.0383	-1.05467	0.40528	0.25232	-1.45003	1.30621	-0.16399	-1.10886	1.01991	-0.8621	1.37835	0.06726	0.07571	0.32176				4.4	3.21462	3.92323	3.16153	1.44855	4.50703	3.68982	4.49422	3.62089
	4.5	12.6094	12.2143	9.36812	11.1885	11.5636	9.69123	13.2956	10.9891	12.8283	9.54052	11.9582	12.3648	12.4967	11.2765	10.1976	12.9556				4.5	1.21898	-0.04545	0.82281	-1.19883	-0.26003	0.08059	-1.03818	0.78444	-0.8806	-0.83397	1.0868	0.09212	1.67771	-0.07668	-0.05161	0.41775				4.5	3.16205	3.93399	3.08989	3.01738	4.86912	3.66763	4.65101	3.24268
	4.6	13.125	11.991	9.66747	10.2537	11.414	9.97765	13.0248	10.7074	12.91	9.56953	11.6924	12.931	13.1677	9.92095	9.95141	12.8037				4.6	1.13224	-0.01554	1.11386	-1.06469	-0.16352	-0.01308	-0.35449	-0.30982	-1.04937	-0.39359	1.4396	0.96294	1.97817	-0.09896	-0.36673	0.66918				4.6	3.33501	4.04844	3.84852	4.63241	4.0861	3.73678	4.22311	3.39096
	4.7	13.4686	11.9998	10.0715	9.48287	11.1096	10.1403	12.0364	11.1633	12.9564	10.0833	12.2983	13.4343	13.4672	9.00282	9.85791	12.0351				4.7	0.48369	-0.33558	0.82007	-0.61808	0.26616	-0.31762	0.17294	-1.21656	-0.73521	-0.06535	1.72838	1.24722	1.93161	0.40957	-0.51795	0.73505				4.7	3.16232	3.83463	4.36915	5.08706	2.56284	3.60969	3.659	3.85449
	4.8	13.4677	12.1961	10.7871	9.24659	10.8894	10.047	11.5881	12.0946	12.9385	10.827	13.2592	13.5297	13.2266	9.14238	10.1214	11.2367				4.8	-0.06609	-0.53649	0.28108	-0.19146	0.65298	-0.6425	0.29758	-1.17072	-0.49481	-0.07124	1.6377	1.17171	1.6953	1.07811	-0.54718	0.3496				4.8	2.45017	3.06383	3.88975	4.66012	1.65531	3.29501	3.6949	4.4828
	4.9	12.8975	12.0274	11.5607	9.25269	11.333	9.68759	12.1372	12.5343	12.9478	11.522	13.9538	13.2339	12.689	10.1127	10.8305	10.8185				4.9	-0.24382	-0.33036	-0.19928	0.03731	0.85031	-0.44252	-0.01164	0.04414	-0.67568	-0.30696	1.21924	0.88407	1.42262	1.47491	-0.47442	-0.09996				4.9	1.9393	2.27549	2.64747	4.10574	1.9703	3.46452	4.01148	4.97002
	5	12.1193	11.6329	11.6615	9.45053	12.4841	9.39182	12.8705	12.1051	12.8566	11.5246	14.1571	13.0447	12.4681	11.2685	11.6551	10.8641				5	-0.2052	-0.09185	-0.40988	0.14595	0.758	0.06674	-0.67863	1.57407	-1.35286	-0.45843	0.73641	0.53388	1.05217	1.54478	-0.14179	-0.22087				5	2.38498	2.24266	1.8535	3.77987	2.77868	4.26116	3.88932	4.98044
	5.1	12.0651	11.5165	11.2381	9.86129	13.4592	9.44385	12.6858	11.4737	12.1306	10.6445	14.167	13.0149	12.7767	12.0664	11.8658	11.2493				5.1	-0.33921	0.09982	-0.28587	0.0198	0.33977	0.38747	-1.28565	2.04623	-2.0664	-0.57563	0.49608	0.55646	0.88853	1.19326	0.37814	-0.16407				5.1	3.42518	2.87827	2.62813	3.49032	3.23848	4.56257	3.72167	4.59644
	5.2	12.6111	11.8843	10.8889	9.90353	13.1506	9.38634	11.3765	11.3934	10.7965	9.41183	14.1972	12.786	13.0302	12.3179	11.298	11.3936				5.2	-0.8203	0.57446	-0.04936	-0.28125	-0.13127	0.22257	-1.30663	1.32094	-1.8359	-0.69483	0.6211	0.86121	1.14018	0.51984	0.69205	-0.05468				5.2	4.02437	3.51884	4.12028	3.1228	3.41058	3.71517	4.05165	4.13386
	5.3	12.7783	12.6592	10.3764	9.36467	11.6866	8.9024	10.171	11.7766	9.96512	8.70833	14.0971	12.3093	12.7837	12.038	10.668	11.0076				5.3	-1.33818	1.06795	-0.03696	-0.30861	-0.30844	-0.54897	-0.78349	0.53018	-0.45805	-0.45504	0.76501	0.9119	1.03937	-0.05619	0.51471	0.23396				5.3	3.77091	3.8173	4.61875	3.00238	3.63028	2.70237	4.5453	3.91792
	5.4	12.4201	13.3248	9.37932	8.91143	10.4959	8.69692	10.3345	11.956	10.2693	8.89091	13.9931	11.7974	12.4687	11.3355	10.6182	10.7907				5.4	-1.33356	1.04162	-0.32083	0.11429	-0.17858	-1.43969	-0.25868	0.23767	0.87912	0.06227	0.64849	0.62759	-0.08715	-0.29355	0.14931	0.48647				5.4	3.16832	3.76284	4.35488	3.1464	4.03801	2.4726	4.39254	4.12547
	5.5	12.2015	13.1908	8.45932	9.02655	10.7361	9.28859	11.5386	11.4316	11.0123	9.31474	13.9869	11.36	12.5665	10.8903	11.0364	11.0418				5.5	-0.80871	0.43935	-0.48777	0.69319	-0.16297	-1.93202	0.00718	0.06244	1.30995	0.14812	0.46424	0.14166	-1.27787	-0.03197	0.01278	0.25894				5.5	2.80256	3.61274	4.43024	3.26185	4.56157	2.8242	3.30016	4.5368
	5.6	12.492	12.4866	8.36818	9.44188	12.1297	10.0351	12.4948	10.6055	11.3999	9.46763	13.3927	10.9727	12.6682	11.3958	11.4356	11.2091				5.6	-0.42932	-0.27589	-0.18893	1.12387	-0.32563	-1.90869	0.15424	-0.13765	1.21262	-0.33905	0.2124	-0.52415	-1.2769	0.70549	-0.08749	-0.38435				5.6	2.78453	3.70435	4.74038	3.37224	4.76533	3.15087	2.23108	4.71555
	5.7	13.0064	12.0396	9.05186	9.80821	13.4372	10.1974	12.6496	10.3872	11.3015	9.61026	11.9767	10.5899	12.2998	12.5756	11.4825	11.0185				5.7	-0.47994	-0.45784	0.31627	1.41559	-0.07262	-1.20874	0.11904	-0.30881	0.90186	-0.80548	-0.24684	-1.211	-0.5834	1.17066	-0.35835	-0.84467				5.7	3.04075	4.13381	4.87269	3.35109	4.59681	3.45499	2.35256	4.57034
	5.8	13.0438	11.9192	9.90578	10.0586	13.9365	9.85056	12.5682	10.9826	11.0336	9.97983	10.8869	10.4563	11.8932	13.3887	11.1384	10.4396				5.8	-0.53599	-0.00956	0.66431	1.42376	0.65305	0.00207	-0.16356	-0.5003	0.31958	-0.9148	-0.55962	-1.64341	-0.52287	0.72475	-0.46215	-0.67649				5.8	3.55018	4.53914	5.24381	2.91866	4.36742	4.06192	3.25974	4.33592
	5.9	12.4996	11.7367	10.6847	10.1447	13.6562	9.56232	12.6464	11.8239	11.0281	10.3137	11.0936	10.8545	11.8655	13.1337	10.6458	9.70672				5.9	-0.31035	0.31779	0.74825	0.79381	1.0722	1.17216	-0.40939	-0.49944	-0.28789	-0.64954	-0.20681	-1.58954	-1.24225	-0.16098	-0.25549	0.09277				5.9	4.37562	4.39424	5.96902	2.404	4.04123	4.66803	3.68137	4.19467
	6	12.0555	11.6149	11.1902	9.97494	12.8315	9.73414	12.611	12.3745	11.4081	10.3737	12.1398	11.6484	12.0037	12.2308	10.4754	9.44712				6	-0.24468	0.01066	0.64927	-0.23721	0.78566	1.94378	-0.42696	-0.33269	-0.60995	-0.06578	0.67035	-1.02549	-1.81879	-0.55368	-0.01376	1.07023				6	5.42557	3.81017	6.11244	2.28618	3.70093	4.73768	3.47977	4.11107
	6.1	11.8746	11.6691	10.8516	9.8967	12.1475	10.2887	12.4168	12.4865	11.8699	10.4027	12.9374	12.5364	12.2019	11.4747	10.8677	9.8862				6.1	-0.52067	-0.44961	0.46371	-0.94884	0.3762	2.12779	-0.36625	-0.34326	-0.43406	0.3076	1.32306	-0.23941	-1.75231	-0.11007	0.13145	1.66088				6.1	5.82325	3.57652	5.33511	2.66793	3.52395	4.34207	3.56715	4.14322
	6.2	11.5687	11.555	9.6955	10.1635	12.2586	10.8127	12.4342	11.9767	12.1062	10.5776	13.1245	13.281	12.4832	10.8402	11.5366	10.6838				6.2	-0.49204	-0.60864	0.26828	-1.06709	0.29075	1.8101	-0.22144	-0.38567	0.26717	-0.1054	1.25146	0.31915	-1.21359	0.80358	0.15939	1.41363				6.2	4.93283	4.16511	4.60817	3.56771	3.49796	4.08232	4.10769	4.35824
	6.3	11.4649	11.1231	8.60104	10.5097	12.7829	10.9974	12.5231	10.9721	12.1782	10.6682	13.1492	13.6809	12.7046	10.1	12.0995	11.2102				6.3	-0.03053	-0.63913	0.19371	-1.0543	0.30113	1.36281	0.22208	-0.14806	0.95897	-1.06427	0.8533	0.48067	-0.47011	1.53527	-0.13111	0.4011				6.3	3.41671	5.25943	4.52471	4.64979	3.66733	4.18554	4.12723	4.58653
	6.4	11.905	10.8324	8.2719	10.6436	12.9331	10.8133	12.1721	10.4426	12.3765	10.6305	13.2254	13.5549	12.7209	9.5702	12.2705	11.0521				6.4	0.105	-0.67387	0.02272	-1.1967	0.42499	0.99298	0.77356	0.255	0.94193	-1.74892	0.85292	0.4298	0.00917	1.7359	-0.61401	-0.49026				6.4	2.39425	5.86612	4.58303	5.21347	3.87453	4.15943	3.59117	4.90536
	6.5	12.1792	11.1255	8.73054	10.523	12.6166	10.4338	11.5183	11.126	12.6054	10.4436	12.9467	12.9608	12.3264	9.59731	11.877	10.7872				6.5	-0.25429	-0.77359	-0.54691	-0.94485	0.84739	0.71054	0.9927	0.64274	0.35209	-1.81372	1.19957	0.35633	-0.00395	1.57195	-0.86059	-0.49945				6.5	2.29952	5.21913	4.21707	5.22388	3.94261	3.66738	3.74563	5.17497
	6.6	11.6584	11.5604	9.56371	10.5158	12.2025	10.1997	10.9195	12.3581	12.5665	10.0367	12.3084	12.4494	11.394	10.1163	10.9369	11.2638				6.6	-0.45757	-1.03472	-1.06383	-0.01077	1.16023	0.58234	0.83767	0.74708	-0.02074	-1.46818	1.20319	0.44036	0.15086	1.2171	-0.92915	-0.0257				6.6	2.74488	3.90591	3.51911	5.09605	4.1718	3.05049	4.71692	4.77112
	6.7	10.7628	11.5828	10.0829	10.8821	11.8221	10.37	10.4667	12.7147	12.3806	9.77684	12.0721	12.3617	10.1485	10.6628	9.91818	12.3148				6.7	-0.42208	-1.28789	-0.77483	0.78109	0.87625	0.6622	0.50929	0.29313	0.08332	-0.9101	0.60893	0.71885	0.84286	0.69944	-0.98741	0.15929				6.7	3.25492	3.10856	2.9518	4.96007	4.70794	2.72476	5.39554	3.81511
	6.8	10.3653	11.2627	9.94253	11.2051	11.5196	10.7186	10.3656	11.7028	12.4424	9.83776	12.5956	12.3208	9.28159	10.9274	9.59038	13.0081				6.8	-0.54389	-1.30003	0.11882	0.79871	0.31103	0.7251	0.2315	-0.22865	0.42095	-0.51435	-0.11709	0.93098	1.40358	0.08457	-0.90533	-0.0039				6.8	3.67062	3.14138	2.93165	4.8961	5.40244	2.72872	5.44852	3.21356
	6.9	10.8722	10.7345	9.81275	11.1361	11.5257	10.7692	10.8243	10.2734	12.8098	10.0398	13.5722	12.2227	9.43122	11.0753	10.3265	12.8482				6.9	-0.69726	-1.12151	0.75257	0.2711	0.23956	0.41501	0.34437	-0.11966	0.76669	-0.56474	-0.50117	0.93137	1.32492	-0.44539	-0.82007	-0.08022				6.9	4.00266	3.5034	3.61165	4.72959	5.96971	2.99503	5.33608	3.29474
	7	12.0689	10.1388	10.3451	10.8498	11.7614	10.4797	11.7326	9.58289	13.0379	10.2682	14.4511	12.544	10.3389	11.2421	11.5621	12.1584				7	-0.77796	-0.82787	0.92347	-0.58089	0.82714	0.05275	0.89393	0.36711	0.78087	-0.70707	-0.44091	0.73976	0.80791	-0.59184	-0.82608	0.18646				7	4.44244	3.5385	4.62446	3.99066	5.85867	3.15983	5.40674	3.59799
	7.1	13.4398	9.85035	10.9313	10.5141	12.0648	10.1895	12.6861	9.85374	12.8185	10.2816	14.5327	13.1339	11.2263	11.4885	12.2383	11.4096				7.1	-0.91628	-0.42564	0.82027	-1.37426	1.38094	0.30776	1.4223	0.50304	0.30989	-0.59118	-0.04178	0.39361	0.18668	-0.15551	-0.66522	0.60377				7.1	4.92791	2.8611	5.41718	3.06688	5.16562	2.75811	5.60787	3.67729
	7.2	14.4232	9.90406	10.8016	10.3554	12.7069	10.1196	13.2708	10.6426	12.2833	10.1725	13.4926	13.2001	11.8606	11.9515	12.0379	10.8774				7.2	-0.84458	-0.01518	0.4218	-1.34646	1.25006	0.84417	1.48168	0.16482	-0.12241	-0.5414	0.33406	0.05698	-0.2375	0.71654	-0.31925	0.93926				7.2	4.90778	2.08518	5.60391	2.93951	4.43333	2.32346	5.37782	3.46574
	7.3	14.5475	10.0495	10.2484	10.7537	13.581	10.3056	13.5224	11.4037	11.8231	10.1904	12.0605	12.6897	12.5193	12.3984	11.5186	10.6414				7.3	-0.37498	0.25381	-0.16574	-0.4479	0.55809	0.86602	1.20097	-0.13366	0.10631	-0.83481	0.33901	0.04644	-0.33384	1.38228	-0.13286	1.1654				7.3	4.22184	2.23062	5.16684	3.51083	3.65749	2.49934	4.5736	3.16633
	7.4	13.9475	10.2768	9.68618	11.534	13.993	10.5588	13.6414	11.8852	11.8096	10.2034	11.4212	12.3343	13.1207	12.4219	11.2232	10.6084				7.4	0.26314	0.1729	-0.55245	0.61065	-0.12548	0.45556	0.89947	-0.04231	0.74486	-1.09517	0.20397	0.37942	-0.45065	1.30955	-0.38496	1.413				7.4	3.56266	3.15028	4.77397	3.87887	2.73836	2.93569	3.97942	3.2594
	7.5	13.3321	10.729	9.1701	12.0185	13.5633	10.3797	13.3934	12.1334	12.0112	10.1126	11.7255	12.494	13.1853	11.9974	11.1513	10.6548				7.5	0.88646	-0.27162	-0.42241	1.45755	-0.49753	0.01216	0.65182	0.14108	0.99239	-0.90876	0.3088	0.64348	-0.78512	0.91464	-0.76489	1.81583				7.5	3.43208	4.02201	4.85422	4.04578	1.95939	3.37075	4.08309	4.03174
	7.6	12.8975	11.1616	9.23692	11.964	12.493	9.79718	12.8675	12.1133	12.0216	9.85701	12.1232	12.7959	12.5053	11.4247	10.8638	10.7893				7.6	1.08621	-0.72123	-0.11327	1.97835	-0.61423	-0.35509	0.52633	0.21558	0.86107	-0.3395	0.5133	0.45999	-0.97336	0.67382	-0.70403	2.08348				7.6	3.46662	4.54679	4.83704	4.70374	1.57764	3.80895	4.48203	4.81827
	7.7	12.3726	11.4452	10.1997	11.6476	11.431	9.50881	12.7296	11.9705	12.1629	9.48328	12.3001	12.775	11.4633	11.1129	10.3303	11.0308				7.7	0.3824	-0.96387	-0.34712	1.68021	-0.8404	-0.59151	0.43399	0.37493	0.84565	0.39869	0.50471	-0.20715	-0.73995	0.35585	-0.33073	1.70627				7.7	3.36279	4.71687	4.32039	5.53964	1.8676	3.97371	4.70617	4.91733
	7.8	11.8411	12.0126	11.4184	11.3803	11.0612	9.53744	12.9784	12.0813	12.6428	9.44283	12.6442	12.4923	10.9154	11.3049	10.2892	11.118				7.8	-0.90419	-1.16572	-1.17701	0.37714	-1.43247	-0.76929	0.14979	0.50145	1.06859	1.06603	0.24242	-0.94153	-0.29264	-0.11081	-0.26502	0.71836				7.8	3.20061	4.89966	3.59008	5.50116	2.93687	3.90735	4.70718	4.75376
	7.9	11.5922	12.9924	12.2261	11.1532	11.543	9.45961	12.8018	12.4914	12.7808	9.96401	13.088	12.3164	11.165	11.7531	10.9526	10.6013				7.9	-1.67892	-1.42557	-1.77708	-0.88272	-1.89224	-0.74201	-0.25855	0.42509	1.35849	1.21549	-0.06654	-1.066	-0.08375	-0.27602	-0.58973	-0.2456				7.9	2.97681	5.55445	2.96832	4.78339	4.13131	3.91921	4.63984	4.6091
	8	11.7607	13.7322	12.3796	10.9513	12.2171	9.32181	11.9032	12.89	11.9969	10.7843	13.1414	12.482	11.5962	11.9672	11.6703	9.60833				8	-1.12892	-1.38597	-1.49057	-0.92036	-1.57981	-0.3236	-0.53228	0.37729	1.35362	0.67351	-0.27085	-0.41102	-0.13929	0.04895	-0.80807	-0.4788				8	2.688	6.11518	2.93004	4.43915	4.64561	3.95769	4.59331	4.14796
	8.1	12.1686	13.6654	12.1804	11.1706	12.3029	9.24571	11.0111	13.0301	10.8714	11.3379	12.778	12.8997	11.8735	11.7924	12.1345	9.17554				8.1	0.20262	-0.87947	-0.71722	-0.11157	-0.82944	0.13681	-0.44581	0.50883	1.0006	-0.17557	-0.42097	0.42272	-0.000910791	0.63359	-0.6887	0.01189				8.1	2.56888	5.7749	3.87344	4.43718	4.50332	3.7239	4.52175	3.63864
	8.2	12.4425	12.8136	12.1518	11.7748	11.9794	9.23763	10.9796	12.7615	10.3353	10.9395	12.3763	13.2954	11.9978	11.248	12.456	9.81522				8.2	0.98258	-0.41974	-0.3187	0.40911	-0.33428	0.29088	0.02727	0.41798	0.71515	-0.73122	-0.46478	0.88111	0.39549	1.15182	-0.33273	0.2852				8.2	2.85666	4.79811	5.26415	4.18617	4.17058	3.17037	4.58255	3.44944
	8.3	12.5022	11.5841	11.9553	12.1028	11.806	9.25478	11.6714	12.2827	10.4437	10.0226	12.2179	13.4312	11.7229	10.3885	12.4665	10.5799				8.3	0.78134	-0.31053	-0.41331	0.43792	-0.05605	0.10304	0.54027	-0.2494	0.56484	-0.6452	-0.17757	1.02505	0.58128	1.21914	0.10503	-0.27563				8.3	3.375	3.872	6.06259	3.94002	3.97964	2.86771	4.86817	3.4792
	8.4	12.6141	10.8126	10.9789	12.1017	11.8682	9.13696	12.4172	12.1154	10.9191	9.90633	12.2394	13.1798	11.2511	9.71855	11.9634	10.6413				8.4	0.32027	-0.4658	-0.41491	0.38313	0.36541	-0.33142	0.64938	-1.02484	0.24171	-0.17069	0.35658	0.96713	0.3237	0.98573	0.32818	-1.09145				8.4	3.74623	3.17864	5.98928	4.23814	4.05159	3.26726	4.88775	3.68564
	8.5	12.9114	11.2198	9.81149	12.179	11.9712	8.81687	12.8678	12.3283	11.7848	10.5534	12.1067	12.8856	11.1875	9.6532	11.2622	10.4055				8.5	0.29383	-0.86185	0.04594	0.3739	0.86973	-0.62569	0.19961	-0.96614	-0.01593	0.18041	0.61124	0.72118	-0.00755	1.05866	0.11072	-1.34311				8.5	3.94714	2.52789	5.50281	4.85267	4.10011	4.05635	4.17078	3.91433
	8.6	13.307	12.5251	9.43	12.3265	12.0008	8.54691	12.965	12.359	12.8118	10.8493	11.6578	13.1051	11.4981	10.0524	10.943	10.5152				8.6	0.55011	-1.11597	0.71794	0.36188	1.1861	-0.6214	-0.52293	0.17689	0.30838	0.24263	0.44459	0.58556	-0.03924	1.41834	-0.39209	-0.92216				8.6	4.25983	1.96148	4.95056	5.03555	3.87144	4.92798	3.0969	3.59407
	8.7	13.7272	13.7378	9.70671	12.2753	11.928	8.70072	12.7128	11.7578	13.4302	10.531	11.2419	13.6975	11.6749	10.6853	11.0177	11.1021				8.7	0.52946	-0.54713	1.02476	0.2673	1.27608	-0.61978	-1.0501	1.41939	0.97653	0.0685	0.17291	0.58368	0.17848	1.61432	-0.72701	-0.29154				8.7	4.69227	1.81082	4.35492	4.43995	3.79521	5.84059	2.43502	2.74291
	8.8	13.8942	13.9162	9.9661	11.7999	11.5888	9.20979	12.0995	10.9144	13.4354	10.358	11.3594	13.972	11.6565	11.3251	11.0555	11.7357				8.8	0.32109	0.78054	0.87465	0.12622	1.22232	-0.64379	-1.25488	1.60646	1.24427	-0.14933	-0.07575	0.39396	0.68603	1.42958	-0.5637	0.01314				8.8	4.93155	2.21206	3.79537	3.53066	4.28606	6.16171	2.56348	2.49118
	8.9	13.7016	12.9807	10.0548	10.9616	11.1677	9.59532	11.3773	10.7746	13.1764	10.7429	12.0305	13.7264	11.6671	11.733	10.9312	11.7508				8.9	0.27235	1.78258	0.7384	0.2384	0.95015	-0.56792	-1.16943	0.82222	0.93176	-0.13675	-0.20509	0.0423	1.40597	0.83796	-0.10649	-0.06696				8.9	4.83781	2.83855	3.33832	2.8448	4.65559	5.00015	3.38119	3.16634
	9	13.6435	12.1825	10.1823	10.4222	11.1768	9.62106	11.2266	11.4436	13.2396	11.2291	12.9944	13.3241	11.7691	11.7302	10.8839	11.1055				9	0.31371	1.69043	0.80927	0.62084	0.48019	-0.60341	-0.92642	0.05003	0.52707	-0.04799	-0.17951	-0.30317	1.81116	0.26393	0.262	-0.27847				9	4.33233	3.36765	3.23992	2.52153	4.04681	2.99699	4.2319	3.65882
	9.1	13.9086	12.5273	10.1677	10.5184	11.6918	9.26019	12.1684	12.0132	13.9257	11.2177	13.8444	12.7821	11.9467	10.9953	11.176	10.4317				9.1	0.50014	0.93695	0.92681	0.81919	0.16432	-0.72232	-0.86892	-0.06606	0.28273	-0.29298	-0.17263	-0.58867	1.51547	0.23527	0.57147	-0.48697				9.1	3.3956	3.71065	3.88967	2.74124	2.90149	1.97457	4.26153	3.35067
	9.2	13.8839	13.3817	9.9538	10.6255	12.3147	8.59447	13.7521	12.0928	14.5839	10.6045	14.0692	12.0951	12.2401	9.82304	11.727	10.0809				9.2	1.02972	0.23858	0.87129	0.7121	0.21046	-0.50089	-0.90421	0.29162	-0.0909	-0.77471	-0.15713	-0.58919	0.60979	0.41003	0.84735	-0.58242				9.2	2.4211	3.82207	4.8132	3.58183	2.28506	2.47599	3.70109	2.59728
	9.3	13.3366	13.8264	10.1357	10.5693	12.6473	8.07617	14.6885	12.0423	14.1984	10.0942	13.66	11.6593	12.6605	9.35502	11.9848	9.87223				9.3	1.55023	-0.29335	0.45525	0.50643	0.23615	-0.06845	-0.45364	0.52687	-0.51683	-1.25203	0.03345	-0.33728	-0.43454	0.10242	0.88824	-0.48638				9.3	1.75768	3.50627	4.90146	4.40709	2.5097	3.5292	3.85711	1.91454
	9.4	13.0464	13.777	11.0205	10.7812	12.6592	8.01732	14.3141	12.1044	12.9696	10.4133	12.9751	11.5107	12.917	10.123	11.748	9.36342				9.4	1.42404	-0.8132	0.07836	0.38724	-0.12641	0.03472	0.37508	0.39465	-0.23094	-1.78836	0.30978	-0.19093	-1.14046	-0.44174	0.86252	-0.4412				9.4	1.50286	2.76662	3.96918	4.39557	3.21505	4.4791	4.85016	1.79666
	9.5	13.5258	13.3222	12.2314	11.025	12.509	8.40297	13.2983	12.2101	11.8789	10.9769	12.2333	11.4986	12.3994	11.2869	11.6083	8.5281				9.5	0.78556	-1.03566	0.39546	0.54373	-0.69253	-0.08802	0.62352	0.16955	0.9042	-2.32267	0.31296	-0.06406	-1.39706	-0.67859	1.09997	-0.68663				9.5	1.91892	2.12363	3.01552	3.61336	3.8898	5.23407	5.19764	2.46804
	9.6	14.2813	12.6702	13.2143	10.9354	12.013	9.152	12.3927	12.3027	11.4601	10.8065	11.7083	11.8588	11.2033	11.8986	11.9162	8.14445				9.6	0.45991	-0.8001	1.3279	0.79167	-1.11317	0.0284	-0.0606	-0.02973	1.98431	-2.46582	-0.099	0.39416	-1.15203	-0.74042	1.51088	-0.95683				9.6	2.93541	2.24037	2.95977	3.0501	4.14561	5.4717	4.31729	3.56103
	9.7	14.6183	12.3834	13.276	10.7383	11.1616	9.92041	11.6884	12.3142	11.8973	9.86457	11.6827	12.6125	10.3895	11.977	12.3706	8.76514				9.7	0.60165	-0.65238	2.13763	0.81691	-1.31117	0.2002	-0.83656	-0.44555	2.25023	-2.0832	-0.43146	0.93014	-0.4333	-0.77407	1.66492	-0.7999				9.7	3.76268	3.20981	3.82023	3.40138	4.15865	5.05389	3.42397	4.37186
	9.8	14.3756	12.6488	12.3786	10.6009	10.6189	10.238	11.1977	12.0099	12.8525	8.65249	12.165	13.2844	10.413	11.8403	12.7821	9.90899				9.8	0.64988	-0.95117	2.08702	0.67901	-1.44703	0.1441	-0.9206	-0.90873	1.75939	-1.5974	-0.16555	1.09224	0.27421	-0.668	1.31745	-0.15477				9.8	3.92042	4.35379	4.78262	4.22156	4.16383	4.15706	3.59045	4.69086
	9.9	13.8072	13.0776	11.3521	10.3922	10.8603	9.94907	11.0393	11.2006	13.2452	7.79837	12.9651	13.5039	10.7026	11.5654	13.106	10.6816				9.9	0.57229	-1.29967	1.11988	0.37478	-1.485	0.40516	-0.41022	-1.04111	1.14895	-1.18739	0.5823	0.94802	0.67772	-0.49679	0.71969	0.5696				9.9	3.66964	5.0431	4.72333	4.69559	4.05948	3.07608	4.4788	4.71258
	10	13.2013	13.3571	10.7301	10.257	11.5802	9.48553	11.1878	10.2213	12.5876	7.73653	13.6883	13.3362	10.9506	11.376	13.0262	10.9224				10	0.51892	-1.33569	-0.06332	-0.00101	-1.20805	1.27967	0.15229	-1.04897	0.91563	-0.63785	1.38153	0.68752	0.99502	-0.50121	0.38784	0.89283				10	3.50049	5.33399	3.61167	4.764	3.64226	2.39273	4.98823	4.41344
	10.1	12.9892	13.3124	10.6334	10.3891	12.204	9.20459	11.4709	9.80735	11.8113	8.47493	14.014	12.9444	11.4169	11.4442	12.4288	11.062				10.1	0.3352	-1.17773	-0.92844	0.00314	-0.62704	1.94867	0.41209	-1.16886	0.81962	-0.15637	1.81311	0.30052	0.95931	-0.75045	0.33752	0.6774				10.1	3.76143	5.26005	2.76253	4.95672	3.03615	2.40775	4.66589	3.91369
	10.2	13.6423	12.9842	11.0715	10.6678	12.2299	8.68721	11.5715	10.3059	11.7508	9.75412	13.9712	12.3846	12.1339	11.6345	11.8207	11.2746				10.2	0.16127	-0.94588	-1.53129	0.37538	0.29222	1.79849	0.48422	-1.01551	0.67902	-0.03803	1.56452	-0.06938	0.24303	-0.90602	0.20682	0.10339				10.2	4.49836	4.5737	2.72299	5.2348	3.02641	2.7812	4.08588	3.69246
	10.3	14.8715	12.6094	11.7117	11.0363	11.53	7.7494	11.382	11.1331	12.2158	10.9907	13.6613	11.9206	12.7568	11.9129	11.4454	11.4478				10.3	0.19516	-0.59133	-2.02516	0.59051	1.60414	1.08627	0.66285	-0.31396	0.72023	-0.0741	0.9171	-0.15888	-0.4633	-0.65284	0.29503	-0.34592				10.3	5.4396	3.68657	2.67165	5.06649	4.04093	3.20166	3.9947	3.96687
	10.4	15.8432	12.3003	11.9771	11.6152	10.6514	7.06066	11.1999	11.4733	12.7672	11.5188	13.0799	12.0303	13.084	12.3828	11.0834	11.3434				10.4	0.1747	-0.15441	-2.16216	0.48239	2.57131	0.26157	0.9017	0.35514	0.67272	-0.000276873	0.50599	-0.07609	-0.71467	-0.00945	0.90194	-0.1325				10.4	5.96847	3.42058	2.24895	4.55817	5.13969	3.81996	4.30741	4.52923
	10.5	16.2879	12.0101	11.4951	12.2903	10.2931	7.26468	11.2301	11.3112	13.211	11.1638	12.4364	12.6908	13.2539	12.8881	10.8336	10.8495				10.5	-0.12653	0.31795	-1.67589	0.23646	2.316	-0.20659	0.96296	0.30745	0.24025	0.1274	0.47711	-0.22475	-0.91328	0.57257	1.31722	0.62239				10.5	5.38	3.72761	2.22173	4.30992	5.26744	4.68091	4.27648	5.28148
	10.6	16.4186	11.518	10.4367	12.7627	10.7085	8.31909	11.4224	11.2518	13.4222	10.6493	12.0925	13.162	13.2792	12.7789	10.9457	10.2787				10.6	-0.34195	0.85591	-0.71302	0.03985	1.24366	-0.18229	0.93723	-0.2099	-0.23504	0.11412	0.51859	-0.49486	-1.22871	0.49828	0.90541	1.15521				10.6	4.10766	4.1269	2.78355	4.40723	4.84025	5.21838	3.7873	5.94391
	10.7	16.1496	10.9565	9.37582	12.82	11.4243	9.71292	11.5851	11.3515	13.1397	10.6476	12.2619	12.9104	12.8702	11.7534	11.5524	10.1701				10.7	-0.0822	1.37339	0.36847	0.07687	0.35601	-0.04035	0.94249	-0.46442	-0.56237	0.10948	0.43827	-0.52682	-1.66243	-0.21539	0.11301	1.05418				10.7	3.14713	4.35032	2.88073	4.38535	4.80313	4.64615	3.50927	5.87926
	10.8	15.3297	10.9343	8.84989	12.3978	11.8971	10.847	11.5037	11.2857	12.2591	10.9816	12.6612	12.321	12.0596	10.7872	12.6686	10.6552				10.8	0.35658	1.58923	1.22899	0.34614	-0.07749	0.19584	0.89796	-0.13045	-0.69647	0.40775	0.33645	-0.40093	-2.16452	-0.84772	-0.11546	0.72183				10.8	2.57597	4.32687	2.22482	3.95085	5.13226	3.29351	3.86916	5.16317
	10.9	14.2408	11.6062	9.16316	11.7455	12.053	11.1709	11.1393	10.9983	11.1638	11.2645	12.7216	12.0768	11.2647	10.9821	13.7691	11.1568				10.9	0.55223	1.3475	1.46305	0.39388	-0.37452	0.65152	0.80824	0.53082	-0.52489	0.74181	0.23794	-0.22545	-2.28063	-0.72738	0.29203	0.41603				10.9	2.2698	4.296	1.88507	3.29098	5.16248	2.43141	4.53879	4.70787
	11	13.218	12.3839	10.2139	11.2399	11.9149	10.5116	10.5797	10.4375	10.4907	11.3287	12.515	12.1893	10.9767	12.1061	13.9247	11.162				11	0.62688	0.7435	0.74409	-0.17535	-0.58995	0.66693	0.58752	0.6876	-0.25868	0.65674	-0.04125	-0.02142	-1.63477	-0.02069	0.57527	0.14302				11	2.46111	4.33107	2.51106	2.87831	4.75304	2.48649	4.79902	5.09957
	11.1	12.2854	12.6064	11.4387	10.925	11.4905	9.50406	10.249	9.83625	10.8001	11.0173	12.5425	12.3266	11.5318	12.9597	12.8572	11.0294				11.1	0.6296	0.00343	-0.41583	-0.8425	-0.47039	-0.13797	0.03014	0.06126	-0.1275	0.35739	-0.58769	0.05082	-0.71593	0.5199	0.33831	0.22195				11.1	3.19977	4.21138	3.35401	2.82377	4.58274	2.81616	4.50612	5.83965
	11.2	11.5061	12.4705	12.3241	10.6847	10.8883	8.93617	10.6346	9.84408	11.747	10.203	13.0995	12.469	12.597	12.6936	11.6663	11.2153				11.2	0.37513	-0.43002	-0.91382	-0.92526	-0.10147	-0.96372	-0.68226	-0.2104	0.13329	0.19797	-1.18277	-0.0754	-0.43069	0.66524	-0.11527	0.54412				11.2	3.89628	3.96549	3.42542	2.89266	4.92585	2.87408	4.31304	6.06431
	11.3	11.1128	12.8409	12.8934	10.7492	10.5037	8.68339	11.4374	10.638	12.0701	9.18628	13.8831	12.764	13.2383	11.6913	11.5513	11.2372				11.3	-0.07831	-0.26966	-0.5052	-0.67757	0.16464	-1.27487	-1.04061	0.49702	0.66809	-0.01208	-1.47765	-0.22019	-0.94265	0.66738	-0.26932	0.36048				11.3	3.97047	3.50662	3.00237	3.22027	5.3	2.90939	4.62056	5.54351
	11.4	11.394	13.6614	13.3825	11.2627	11.0434	8.2771	11.9626	11.5974	11.3406	8.6096	14.1056	13.0223	13.0918	10.9459	12.0069	10.668				11.4	-0.50306	0.36297	0.16148	-0.48922	0.24507	-1.39814	-0.81284	1.11353	1.04091	-0.40499	-1.35575	-0.12221	-1.46086	0.5254	0.14234	-0.32902				11.4	3.70601	2.88166	3.16582	3.75971	5.41126	3.15053	4.88887	4.63543
	11.5	12.4379	13.7741	13.577	11.8183	12.5235	7.90821	12.0225	12.2229	10.6488	8.8446	13.5653	12.8092	12.692	10.8624	11.9751	10.0928				11.5	-0.71263	1.15081	0.77062	-0.21271	0.23184	-1.37273	-0.28287	0.89766	0.9865	-0.7579	-0.88516	0.16142	-1.14106	0.1897	0.88066	-0.76173				11.5	3.66974	2.74153	4.02767	3.98682	5.32918	3.30482	4.73522	3.99789
	11.6	13.5641	12.757	12.993	12.0602	13.7022	8.19118	11.8834	12.5724	10.957	9.72615	12.8617	12.1655	12.5556	11.0974	11.5557	10.1836				11.6	-0.58944	1.52409	1.35713	-0.04086	-0.04288	-0.83532	0.13103	0.39343	0.73324	-0.78446	-0.33452	0.32943	-0.12085	-0.09415	1.24156	-0.88647				11.6	3.83845	3.24058	4.81	3.74261	5.00305	3.418	4.53291	3.97587
	11.7	13.7708	11.5298	11.7995	11.9244	13.5204	9.33363	11.8412	12.608	11.7898	10.6495	12.2387	11.7457	12.6478	11.3495	11.2096	10.7959				11.7	-0.15162	1.03722	1.68774	-0.57779	-0.6075	0.01703	0.25263	0.1283	0.25083	-0.35594	-0.12224	0.46645	0.76643	-0.26701	0.89891	-0.93749				11.7	3.95007	3.87977	5.04475	3.32328	4.54113	3.75539	4.34058	4.09124
	11.8	13.2088	11.1049	10.7337	11.5153	12.4866	10.6602	12.0465	12.2356	12.1966	11.0833	11.521	11.9772	12.5845	11.626	10.864	11.2262				11.8	0.49379	0.1064	1.69951	-1.54628	-0.9173	0.53339	0.24326	0.13603	-0.54135	0.13421	-0.45992	0.97707	1.08842	-0.41977	0.65957	-0.49626				11.8	4.06287	4.45401	4.72979	3.10945	4.40588	4.02368	3.92456	3.97375
	11.9	12.9723	11.4602	10.1959	11.2875	11.7451	11.0484	12.4047	11.8717	12.0402	10.9877	10.8396	12.6648	12.3483	11.9569	10.5346	11.2068				11.9	1.00421	-0.3876	1.68351	-1.98836	-0.5859	0.51676	0.43339	0.45172	-1.03996	0.34878	-0.84071	1.55677	0.92198	-0.44286	1.20772	0.47787				11.9	4.46652	4.72979	4.12728	3.22037	4.63041	3.96904	3.74242	3.97895
	12	13.2988	11.8939	10.1983	11.7937	11.5225	10.1818	12.2973	11.7668	11.7304	10.8483	10.5694	13.3234	12.342	12.2663	10.3913	11.1431				12	0.93531	-0.47819	1.67499	-1.62719	0.12656	0.23959	0.67844	0.89771	-0.72627	0.4085	-0.43315	1.4353	0.50105	-0.22655	1.77167	1.20665				12	4.94171	4.22187	3.62166	3.50845	4.69417	3.75002	4.03447	4.43283
	12.1	13.6331	12.0409	10.7387	12.8628	11.2509	9.07517	11.5261	11.612	11.6752	11.449	10.7876	13.5668	12.5162	12.2641	10.299	11.419				12.1	0.16487	-0.79911	1.50679	-0.97546	0.79312	0.06496	0.50341	0.99659	0.0163	0.39915	0.75661	0.74486	0.20109	0.04082	1.49474	1.22169				12.1	4.941	3.12048	3.02194	3.86902	4.40653	3.5247	4.06922	5.18725
	12.2	13.8567	12.0911	11.5267	13.4729	10.7781	8.83424	10.9833	11.3546	11.8624	12.7874	11.4362	13.2537	12.5846	11.8175	10.185	11.6958				12.2	-0.91474	-1.16099	1.14288	-0.468	1.04435	0.23033	-0.17874	0.65621	0.60417	0.43996	1.61979	0.23839	0.43485	0.14521	0.7477	0.81251				12.2	4.30027	2.43715	2.09421	4.05544	4.00826	3.68135	3.71419	5.62874
	12.3	13.918	12.3764	12.0145	13.1468	10.6952	9.3252	11.1843	11.2388	11.7486	13.8029	12.4292	12.5775	12.6338	11.5196	10.048	11.4584				12.3	-1.59355	-1.12126	0.66288	-0.07223	0.77204	0.38378	-0.90809	0.06313	0.92703	0.62584	1.2784	0.23245	1.03634	0.09523	0.34486	0.58952				12.3	3.23001	2.626	1.63878	3.83909	3.93203	4.56438	3.72829	5.52085
	12.4	13.6418	12.9049	12.1336	12.5257	11.1966	9.76666	11.5596	11.0806	11.038	13.6787	13.3746	11.9448	12.7157	11.802	9.78354	10.9979				12.4	-1.45245	-0.8223	0.19776	0.16527	0.26123	-0.0132	-1.14962	-0.62236	1.03344	0.58223	0.31581	0.51217	1.06337	0.03771	0.32538	0.61961				12.4	2.29898	3.0775	2.31295	3.45714	4.47056	5.49203	4.38863	5.32922
	12.5	13.3472	13.2959	12.1172	12.1539	11.5171	9.94707	11.5963	10.6123	10.296	12.734	13.848	11.4554	12.6702	12.2693	9.64435	10.787				12.5	-0.77278	-0.64956	-0.14792	0.04101	-0.06957	-0.54631	-0.74502	-0.96505	0.93262	0.07714	-0.18423	0.82238	0.19043	0.08785	-0.02723	0.41753				12.5	2.17435	3.43037	3.55412	3.19527	5.13968	5.64061	5.25548	5.29132
	12.6	13.3497	13.5076	11.9232	12.0112	11.0373	10.0562	11.338	10.387	10.2066	11.715	13.8171	11.0699	12.4778	12.4262	9.96869	10.7177				12.6	-0.15421	-0.79724	-0.26603	-0.21279	-0.14734	-0.53326	0.0209	-0.8208	0.77079	-0.54971	-0.15906	0.9069	-0.63504	0.09989	-0.95882	-0.09987				12.6	2.62065	4.03252	4.70325	3.22346	5.04057	5.10452	5.79792	5.14271
	12.7	13.4818	13.9059	11.5172	11.9942	10.2851	10.2093	11.0002	10.995	10.6394	11.0012	13.7583	11.169	12.3514	12.2116	10.7421	10.5614				12.7	0.08239	-0.88022	-0.18312	-0.07626	-0.1752	-0.21917	0.58832	-0.76933	0.7904	-0.69988	-0.1586	0.53423	-0.64198	-0.15742	-1.80186	-0.45661				12.7	2.81317	4.69107	5.45137	3.80164	4.23405	4.32683	5.81614	4.73132
	12.8	13.6443	14.2224	11.1053	11.9727	10.2136	10.4831	10.8447	12.0053	11.0149	10.567	14.0543	12.0122	12.3679	11.8903	11.7524	10.3427				12.8	0.05123	-0.39093	-0.24351	0.53798	-0.20534	0.06665	0.67713	-1.0162	1.07726	0.05529	-0.18645	-0.06009	-0.19831	-0.44758	-1.97387	-0.4642				12.8	2.61572	4.80169	5.36653	4.64452	3.77908	3.74041	5.43074	4.23615
	12.9	13.9691	13.8705	10.6895	11.8787	10.8888	10.7643	11.1718	12.6478	11.0277	10.4169	14.3774	12.8025	12.4308	11.6747	12.509	10.1959				12.9	-0.0649	0.28145	-0.48437	1.15143	-0.18511	0.46142	0.49916	-1.15132	1.39013	1.25757	-0.06684	-0.27276	-0.00914	-0.33724	-1.55966	-0.52705				12.9	2.25735	4.48524	4.57592	5.02503	4.03379	3.65572	5.05128	4.01195
	13	14.3594	13.1281	10.1204	11.9081	11.4641	10.8559	11.8506	12.8356	10.7073	10.6288	14.3287	12.725	12.6459	11.4763	12.4646	10.2215				13	-0.26807	0.59089	-0.41599	1.48789	0.01234	0.81873	0.28317	-1.11035	1.41703	1.96694	0.04868	0.04051	-0.12132	0.02271	-0.93122	-1.02276				13	1.85173	4.16535	3.77698	4.76439	4.32323	3.83904	4.67227	4.07613
	13.1	14.6203	12.6395	9.58545	12.3296	11.4574	10.6086	12.3383	12.7608	10.4551	10.9414	13.9006	12.2027	13.1091	11.0541	11.7717	10.4512				13.1	-0.55137	0.84908	-0.11756	1.80949	0.25467	0.71083	0.18221	-1.09429	1.19764	1.87063	0.03363	0.41308	-0.05526	0.13375	-0.33064	-1.53313				13.1	1.83651	3.87348	3.41415	4.15937	4.31609	3.56242	3.72119	4.099
	13.2	14.8231	12.4617	9.3812	12.9994	11.3065	10.0365	12.2733	12.3333	10.7246	10.8909	13.3723	12.0193	13.3976	10.7689	10.9982	10.7411				13.2	-0.73631	1.15364	-0.21795	2.1677	0.09459	0.06371	0.38374	-0.97854	0.981	1.10575	0.0046	0.50557	0.37585	-0.12809	0.12823	-1.43249				13.2	2.74342	3.58834	3.73649	3.355	4.31277	2.58971	2.72394	4.36014
	13.3	15.1038	12.3637	9.56552	13.5129	11.3762	9.36215	11.7429	11.6373	11.4855	10.449	13.0489	12.2976	12.9731	11.2539	10.4812	10.9672				13.3	-0.68193	1.14942	-0.74551	2.17264	-0.50316	-0.641	0.97885	-0.56836	0.92839	0.14812	0.01844	0.39842	0.80713	-0.49231	0.33805	-0.92601				13.3	4.25082	3.59917	4.38022	2.64068	4.32334	1.81282	2.88134	5.31677
	13.4	15.4558	12.4472	9.98722	13.8114	11.3693	8.9185	11.3202	11.0308	12.3051	10.386	13.0213	12.4969	12.0716	12.1136	10.3248	11.2289				13.4	-0.43858	0.92092	-1.17573	1.84847	-1.11275	-0.84312	1.59442	-0.03158	1.06519	-0.09535	-0.04601	0.31037	0.84588	-0.71724	0.17358	-0.54269				13.4	5.55085	3.81815	4.37548	2.51362	4.30934	2.22303	3.75333	6.40452
	13.5	15.6905	12.8827	10.3915	13.8382	11.2546	8.86498	11.4784	10.7683	12.5156	11.2375	13.1419	12.19	11.5982	12.4441	10.2738	11.4064				13.5	-0.04236	0.67501	-1.27574	1.6493	-1.2651	-0.44942	1.54475	0.38857	1.24435	0.53503	-0.18508	0.32803	0.55772	-0.72736	-0.25509	-0.26149				13.5	6.49859	3.6513	3.74712	2.94914	4.44613	3.64959	3.88771	6.67205
	13.6	15.5744	13.5237	10.5468	13.4338	11.534	9.00718	11.9137	10.8249	11.722	12.1573	13.2038	11.5949	11.7917	12.2704	10.0179	11.3217				13.6	0.42875	0.41904	-1.20724	1.54758	-0.80334	0.07432	0.77836	0.61591	1.16309	1.14229	-0.22594	0.32652	0.30728	-0.59609	-0.48338	0.31503				13.6	7.30297	3.1559	3.2821	3.43951	4.19952	4.98083	3.25876	6.04347
	13.7	15.1014	13.9233	10.4232	13.0352	12.2176	9.35818	12.3002	10.9438	10.5938	12.0866	13.4994	11.0638	11.9491	12.1128	9.79307	11.068				13.7	0.67371	0.28236	-1.21055	1.06556	0.07291	0.20427	0.14322	0.64948	0.5674	1.04139	-0.24298	0.24497	0.34163	-0.43756	-0.15783	0.984				13.7	7.39234	3.03932	3.12078	3.55047	3.39262	5.40511	3.17728	5.31839
	13.8	14.5841	13.7546	10.2748	13.0937	12.6841	9.73532	12.6683	10.9419	10.0784	11.2019	14.1618	10.6266	11.7004	12.0701	9.82081	10.8797				13.8	0.55941	0.31888	-1.30407	0.27724	1.02284	0.000936947	0.35195	0.51386	-0.30925	0.40748	-0.4713	0.22723	0.4985	-0.24145	0.46773	1.18836				13.8	6.14787	3.31155	3.06634	3.27626	3.04991	5.00112	3.90661	4.86881
	13.9	14.4055	13.1353	10.6721	13.2104	12.6358	9.52951	12.7607	11.0379	10.0281	10.4224	14.449	10.3134	11.512	11.9089	9.86874	10.917				13.9	0.32431	0.3328	-1.29746	-0.08784	1.84213	-0.26632	1.08206	0.2792	-0.76296	-0.14433	-0.75126	0.34723	0.44409	-0.11609	1.00677	1.00608				13.9	4.29683	3.46138	2.97605	3.11843	3.4988	4.44767	4.46711	4.44088
	14	14.4153	12.5852	11.7584	12.9233	12.414	8.94971	12.4262	11.4512	9.96848	10.3322	14.1055	10.5465	11.7018	11.4372	10.0598	10.9044				14	0.10382	0.01506	-1.26609	0.18259	2.28638	-0.60435	1.38114	0.12922	-0.44082	-0.29861	-0.79042	0.52566	0.30922	-0.24009	1.36083	0.61077				14	3.15997	3.74495	2.82315	3.47085	3.86958	4.48464	4.74273	4.20406
	14.1	14.2054	12.2334	12.6804	12.4407	12.1913	8.64472	11.9835	11.9395	10.2739	10.8003	13.7523	11.5821	12.2434	10.8375	10.7384	10.5488				14.1	-0.03387	-0.58585	-1.41258	0.47523	1.96513	-0.77262	0.94249	0.24078	0.30346	-0.25849	-0.62463	0.53213	0.47113	-0.26201	1.31761	-0.03512				14.1	3.13026	4.58747	2.89704	3.87864	3.62975	4.88535	5.34707	4.35983
	14.2	13.9631	11.6773	12.7448	12.2767	12.0603	8.57931	11.4512	12.121	11.1213	11.3124	13.8152	12.814	13.3234	10.4421	11.8553	10.2133				14.2	0.18179	-0.97131	-1.45257	0.35814	1.02412	-0.46633	0.38846	0.49445	0.86347	-0.28461	-0.3677	0.19022	0.87665	0.13494	0.61104	-0.50542				14.2	3.69816	5.49326	3.28587	3.76878	3.0505	4.68156	6.03997	4.50495
	14.3	14.1347	11.1791	12.447	12.5738	12.3788	8.54706	10.6912	11.9185	11.7217	11.3963	14.1494	13.4926	14.4158	10.203	12.996	10.3668				14.3	0.76229	-0.94565	-1.26368	-0.09381	0.11989	0.10048	0.19115	0.46924	0.92173	-0.47946	-0.09853	-0.39669	1.14794	0.46806	-0.43144	-0.36252				14.3	4.03473	5.64746	3.48734	3.37536	2.67117	3.94708	6.02455	4.4109
	14.4	14.5839	11.2611	12.2393	12.9719	13.2408	8.53042	10.1052	11.5016	11.67	10.8231	14.2744	13.6185	14.3182	9.96904	13.3807	10.9389				14.4	1.28146	-0.57515	-1.0082	-0.57607	-0.48086	0.46651	0.20943	0.000197139	0.62683	-0.91469	0.05288	-0.84678	0.99558	0.27468	-1.07125	0.09084				14.4	3.55636	4.95592	3.22278	3.22974	2.69917	3.36335	5.13172	4.14357
	14.5	14.8437	11.8032	11.8527	13.0785	14.2635	8.63191	10.0354	10.9951	11.6859	10.1453	13.944	13.3526	13.224	10.052	12.5943	11.2965				14.5	1.29372	-0.1211	-0.43269	-0.88954	-0.89992	0.29277	0.36026	-0.55326	0.20823	-1.47037	0.20498	-0.67936	0.48403	-0.13584	-0.98415	0.3489				14.5	2.67832	4.15611	3.0201	3.51461	2.82456	2.82629	4.01722	3.92939
	14.6	14.7771	12.5016	11.3783	12.6103	15.0143	8.88828	10.1643	10.7812	12.3437	10.3259	13.4419	12.7461	12.4856	10.6705	11.3762	10.9266				14.6	0.64578	-0.05409	0.38045	-1.01269	-1.09375	-0.2931	0.82366	-0.83027	-0.23229	-1.79775	0.55481	0.12992	-0.02451	-0.26118	-0.46952	0.39488				14.6	2.26384	4.11849	3.56824	4.05859	2.93802	2.51988	3.39314	4.34314
	14.7	14.7505	12.9557	11.0683	11.7276	15.2051	8.82021	10.0091	11.1225	12.9413	11.5283	13.2473	12.0591	12.5624	11.3562	10.7217	9.94055				14.7	-0.30009	-0.39787	0.69583	-0.98563	-1.1675	-0.62808	1.25401	-0.78109	-0.57553	-1.62334	0.93215	1.05537	-0.30223	-0.21958	0.04122	0.34453				14.7	2.45908	4.48987	4.70867	4.27997	3.37393	3.04403	3.41233	5.23534
	14.8	15.3317	12.8151	10.7617	11.1088	14.4995	8.21233	9.6696	11.5037	12.7958	12.9578	13.4241	11.5362	13.0687	11.4954	10.6417	8.99037				14.8	-0.9021	-0.65209	0.34947	-0.82607	-1.39609	-0.53111	1.07555	-0.50625	-0.5664	-1.10033	1.05412	1.66462	-0.27348	-0.38139	0.38701	0.05742				14.8	2.82182	4.3341	5.36982	3.90961	4.05026	4.04276	3.67074	5.49271
	14.9	16.1996	12.1228	10.5838	11.0077	13.2972	7.5584	9.78531	11.3317	12.4409	13.6867	13.5418	11.1971	13.6349	11.0747	10.7171	8.89387				14.9	-0.9645	-0.40429	0.00591	-0.49807	-1.57888	-0.65663	0.53593	-0.22682	-0.0809	-0.66863	0.9385	1.65113	0.21522	-0.58638	0.64348	-0.47742				14.9	2.93017	3.88979	4.65689	3.64622	4.32984	5.00814	3.60974	4.85759
	15	16.3145	11.281	10.6643	11.2398	12.6913	7.43592	10.3505	10.6537	12.3608	13.4018	13.3956	11.0287	13.9445	10.8064	10.9261	9.69106				15	-0.76681	0.1815	0.00648	-0.13304	-1.42627	-1.24245	0.23178	-0.09041	0.37486	-0.43715	0.74325	0.82244	1.06191	-0.52986	0.78952	-0.9728				15	2.89069	3.93272	3.10677	3.8688	3.77327	5.79123	3.23134	4.39222
	15.1	15.4316	10.7559	10.6109	11.5746	12.6638	8.03617	10.8279	9.95052	12.244	12.3716	13.2013	11.2449	13.961	11.2569	11.1169	10.7854				15.1	-0.63508	0.53951	0.0772	-0.01707	-1.11173	-1.75765	0.33089	-0.05444	0.05725	-0.21021	0.36119	-0.50012	1.69144	-0.19091	0.79066	-0.9115				15.1	3.21907	4.17341	2.17216	4.09347	2.93249	6.04017	3.04906	4.5099
	15.2	14.1668	10.6286	10.3674	11.5503	12.5427	8.75529	11.1928	9.63049	11.7815	11.0109	13.1086	11.9499	13.7359	11.9906	10.9614	12.0037				15.2	-0.65884	0.58068	0.10313	-0.08272	-0.64298	-1.81272	0.59131	-0.17216	-0.89734	-0.08377	-0.3165	-1.54175	1.65082	0.22518	0.91924	-0.13054				15.2	4.08385	3.90231	2.3584	3.9348	2.9296	5.86747	3.48011	4.47206
	15.3	13.0525	10.5261	10.228	11.1289	12.648	8.80947	11.7069	9.82989	11.1991	9.74282	12.9615	12.9081	13.3609	12.306	10.7337	13.225				15.3	-0.75567	0.50311	0.24134	0.13847	0.0844	-1.38293	0.52377	-0.52096	-1.60036	-0.28923	-0.84769	-1.64591	1.07706	0.49806	1.20244	0.78844				15.3	4.84504	3.36831	2.91014	3.41156	3.77969	5.82355	4.34015	4.13749
	15.4	12.4238	10.3522	10.0032	10.7735	13.3571	8.28868	12.2826	10.3667	10.922	9.18972	12.7782	13.7907	13.1876	12.1929	11.1289	13.7338				15.4	-0.79225	0.21978	0.38432	0.55287	0.50557	-0.80989	0.2485	-0.95173	-1.51845	-0.56495	-0.77407	-0.96518	0.3489	0.47336	1.1796	1.24498				15.4	4.64368	3.38152	3.06297	3.00988	4.58007	5.79472	4.71329	3.95443
	15.5	12.6026	10.4323	9.68415	10.5015	13.7208	8.18043	12.769	10.9023	10.8562	9.5944	13.1247	14.2357	13.1627	11.9735	12.1696	12.949				15.5	-0.63596	-0.19427	0.24457	0.40546	0.21784	-0.75314	0.47803	-1.38566	-0.86466	-0.52295	-0.24947	0.00306	-0.22766	0.13531	0.68676	1.02711				15.5	3.55937	4.07294	2.90201	3.35511	5.24083	5.29005	4.31458	3.93631
	15.6	13.5549	10.6442	9.78177	10.1362	12.8852	9.13064	13.2978	11.4216	10.5674	10.3693	14.0791	14.0336	12.8867	11.8505	13.1806	11.2173				15.6	-0.31388	-0.28858	-0.09397	-0.50744	-0.12087	-1.31192	1.01002	-1.9072	-0.0658	-0.39812	0.42906	0.88031	-0.47377	-0.18673	0.02945	0.27276				15.6	2.64923	4.67388	3.20586	3.98678	5.79014	4.44246	3.85617	3.67658
	15.7	14.8612	10.5569	10.1747	9.99954	11.4351	10.4496	13.5935	12.215	9.96304	11.0377	14.8527	13.2557	12.482	12.0009	13.5398	9.57615				15.7	-0.01412	0.08943	-0.3006	-1.56402	-0.07186	-1.73804	1.1334	-2.22514	0.54722	-0.53145	0.83132	0.9676	-0.45933	-0.19156	-0.46682	-0.35449				15.7	2.33823	4.53799	4.08535	3.89132	5.71322	3.78908	3.4386	3.05147
	15.8	15.9351	10.2097	10.2897	10.492	10.2665	11.1946	13.0363	13.1229	9.2207	11.6898	15.0542	12.2218	12.3758	12.3215	13.2934	8.86093				15.8	-0.00595	0.47795	-0.44392	-1.98069	0.06153	-1.44315	0.98563	-1.89713	0.63837	-0.72462	0.80779	0.00313	-0.47909	-0.00988	-0.71446	-0.26191				15.8	2.29276	4.12875	4.51395	3.16888	4.91595	3.90503	2.92138	2.56906
	15.9	16.0711	10.2113	10.1438	11.5019	9.87311	11.2265	11.5658	13.5627	8.71947	12.2635	14.851	11.5325	12.473	12.378	12.9885	9.10673				15.9	-0.28113	0.4807	-0.77988	-1.60115	0.1025	-0.61547	0.8349	-1.13266	0.01316	-0.74997	0.70109	-0.88903	-0.72721	0.11498	-0.75308	0.18491				15.9	2.27799	4.32304	4.04375	2.77904	4.02203	4.75909	2.72074	2.73702
	16	15.1425	10.7491	9.89611	12.4637	10.313	10.7601	9.97766	13.0918	8.78716	12.462	14.2574	11.4396	12.4703	12.2022	12.5891	9.98359				16	-0.55341	0.34174	-1.02245	-0.98969	0.05637	0.29393	0.48993	-0.43972	-0.92395	-0.58076	0.5261	-0.69546	-1.15558	0.06385	-0.46357	0.25098				16	2.2638	5.1142	3.59304	3.02497	3.77944	5.3003	2.92427	3.57022
	16.1	14.1616	11.179	9.23616	12.5976	11.2262	10.0003	9.23865	11.8882	9.31617	12.2618	13.5958	11.6186	12.5659	12.1751	11.7717	10.9335				16.1	-0.83301	0.53302	-0.81557	-0.38133	-0.09456	1.08589	0.07227	0.07387	-1.23031	-0.37133	0.26672	0.20883	-1.42147	0.09034	-0.02976	-0.06546				16.1	2.35611	5.54609	3.794	3.43819	4.3583	4.81083	3.32384	4.63542
	16.2	14.0979	11.1258	8.2233	11.7817	12.1746	9.20317	9.61176	10.8208	9.99442	12.0558	13.4869	11.7975	12.9583	12.1475	11.1723	11.1998				16.2	-1.23439	1.0029	-0.42957	0.43786	-0.38584	1.30064	-0.18111	0.55942	-0.54905	-0.32796	0.26015	1.05034	-0.89984	0.43044	0.19349	-0.04952				16.2	2.57154	4.93372	3.98444	3.87162	4.93987	3.79916	3.86954	5.26024
	16.3	14.5712	10.6468	7.85769	10.9714	12.7189	8.71771	10.6194	10.5345	10.4409	12.0913	13.7312	12.0507	13.3713	11.8202	11.3541	10.9276				16.3	-1.48778	1.12791	-0.04329	1.30692	-0.74545	0.60215	-0.44002	1.00319	0.29015	-0.30649	0.59939	1.47217	0.38584	0.66953	0.34577	0.70594				16.3	2.94064	3.80839	3.6602	4.24189	4.59668	3.02386	4.3192	5.27577
	16.4	14.9093	10.0188	8.6683	10.829	12.6115	8.92849	11.4976	10.7334	10.3856	12.062	13.7503	12.5377	13.4282	11.3821	11.637	10.9402				16.4	-1.28762	0.793	0.37109	1.68113	-0.94131	-0.51704	-0.65943	1.22932	0.32716	-0.1242	1.06603	1.2653	1.44751	0.40945	0.51041	1.57121				16.4	3.60685	3.06162	3.25121	3.99519	3.56559	2.72084	4.16896	5.14067
	16.5	15.0409	9.99457	9.84234	11.032	11.9895	9.69903	11.8797	10.9896	10.3863	11.6983	13.5476	13.1945	12.9827	11.1537	11.342	11.0671				16.5	-0.63102	0.38915	0.44754	1.36383	-0.80193	-1.41257	-0.5958	1.18902	-0.47049	0.285	1.24746	0.40943	1.63055	0.03581	0.49568	1.50296				16.5	4.3001	2.82968	3.17703	3.14649	2.92051	2.76947	3.39043	5.19205
	16.6	14.6879	10.8302	10.5146	11.387	11.2718	10.2502	12.1356	11.2173	11.1312	11.3414	13.472	13.5905	12.2903	11.2397	10.8532	10.646				16.6	0.09459	-0.11646	-0.06699	0.75659	-0.41919	-1.66747	-0.49013	0.94018	-1.34261	0.9233	0.84042	-0.58321	1.20885	0.05908	0.31857	0.53435				16.6	4.38355	3.00049	3.27769	2.56628	3.22	2.79734	2.60019	5.05161
	16.7	13.5907	11.6642	10.7028	11.9216	10.7398	10.133	12.3905	11.0828	11.9285	11.2181	13.8644	13.4676	11.8235	11.6806	10.7957	10.0282				16.7	0.20369	-0.59323	-0.68993	0.24969	-0.00393	-1.19706	-0.39223	0.68007	-1.70989	1.33231	0.20539	-0.88902	0.6869	0.31749	0.01999	-0.32222				16.7	4.13393	3.48071	3.45011	2.42443	4.05563	2.68264	2.22533	4.47813
	16.8	12.3806	11.7651	10.658	12.2355	10.1443	9.74768	12.3692	10.4528	11.9024	10.9418	14.6045	13.1576	11.818	12.3561	11.13	10.066				16.8	-0.47526	-0.61124	-0.6763	-0.08215	0.42683	-0.57376	0.11988	0.55065	-1.64564	1.01828	-0.17364	-0.30539	0.31399	0.28681	-0.26784	-0.57872				16.8	4.37094	3.79561	3.87771	2.0431	4.27569	2.92457	2.28035	3.91939
	16.9	11.8711	11.2751	10.501	12.2085	9.67712	9.67094	12.1571	10.2225	11.535	10.1886	14.8116	12.9383	12.2569	12.8635	11.3184	11.0019				16.9	-1.1835	-0.249	0.01333	-0.14829	0.97087	-0.30064	0.95518	0.31878	-1.25783	0.29027	-0.31202	0.19556	0.25012	-0.11727	-0.2365	-0.48834				16.9	4.82626	3.6429	4.31303	1.74507	3.21156	3.49191	2.74075	3.71235
	17	12.016	10.7299	10.2966	12.1064	10.0486	9.81646	12.0351	11.011	11.5369	9.28283	14.0003	12.772	12.8394	12.9544	10.8496	12.0705				17	-1.20824	0.18373	0.72406	0.0634	1.33361	-0.20803	1.49483	-0.19489	-0.53632	-0.09579	-0.34587	-0.16206	0.52357	-0.57583	-0.09761	-0.18666				17	4.84919	3.37354	4.25871	2.59622	2.03909	3.7936	3.27085	3.87566
	17.1	12.3978	10.5614	9.8291	11.7228	10.8511	9.81135	12.0158	11.9694	11.8785	8.87457	13.1046	12.8009	13.0986	12.814	10.0555	12.0667				17.1	-0.73888	0.57746	1.02545	0.26512	1.13776	-0.01033	1.37303	-0.71972	0.29158	-0.01906	-0.4181	-0.74164	0.8544	-0.76764	-0.37489	0.26793				17.1	4.54226	3.25845	3.85476	4.12933	2.1643	3.64307	3.50811	4.2743
	17.2	12.9549	10.6113	9.2925	10.9107	10.7104	9.86271	11.8635	12.1234	12.1795	9.27272	13.0747	13.0346	12.954	12.5456	9.92139	10.9563				17.2	-0.39583	0.7346	1.07695	0.18794	0.55071	0.3015	0.87624	-0.95992	0.86319	0.14264	-0.71467	-0.77054	0.94437	-0.72117	-0.94605	0.45282				17.2	4.18656	3.29362	3.89763	4.74147	3.252	2.88656	3.93859	4.65539
	17.3	13.6746	10.5226	9.34547	10.3354	9.52839	10.3613	11.535	11.7735	12.3556	10.0665	13.337	13.1039	12.6759	12.0854	10.4797	10.157				17.3	-0.47407	0.40331	1.10879	-0.11341	-0.03128	0.59467	0.54112	-0.81039	0.99043	0.24421	-1.23326	-0.29521	0.73578	-0.96491	-1.24516	0.31159				17.3	4.11984	3.32535	4.6542	4.23421	4.13297	1.75218	4.76114	4.81809
	17.4	14.3492	10.5043	9.89852	10.4796	8.69772	11.0244	11.4039	11.5709	12.6294	10.5122	13.044	12.9302	12.4341	11.7236	10.8504	10.4847				17.4	-0.75909	-0.17906	1.13184	-0.18594	-0.3386	0.75621	0.49995	-0.32481	0.81876	0.03584	-1.58415	0.26816	0.25869	-1.5362	-1.12342	0.30569				17.4	4.50175	3.27973	5.08326	3.8747	4.32503	1.41792	4.89084	4.66879
	17.5	14.6979	10.7323	10.2157	10.8954	8.79997	11.3466	11.5682	11.5386	12.7864	10.3735	12.4155	12.665	12.3872	11.8345	10.5691	11.3544				17.5	-0.81622	-0.43504	1.02048	0.25363	-0.32428	0.55151	0.64089	0.09807	0.70718	-0.57296	-1.51334	0.30853	-0.3635	-1.56752	-0.78394	0.43325				17.5	4.69235	3.38878	4.49191	4.16251	4.11814	2.48335	3.93138	4.42545
	17.6	14.4102	10.9975	9.99773	10.826	9.42199	11.4139	11.7069	11.6606	12.4824	9.93771	12.0788	12.188	12.4806	12.0783	10.0308	11.8919				17.6	-0.48608	-0.22496	0.64678	0.85785	-0.0764	-0.15014	0.6196	0.2412	0.85521	-0.98532	-1.17341	-0.38534	-0.72649	-0.64265	-0.28623	0.39262				17.6	4.0148	3.7419	3.71972	4.55444	4.05892	3.8944	3.13821	4.47396
	17.7	13.4677	11.1118	9.41329	10.2014	10.5743	11.31	11.6626	12.013	11.7735	9.37809	12.2247	11.498	12.4435	11.7623	9.89339	11.6448				17.7	-0.04268	0.13698	0.27272	1.24741	0.3732	-0.73618	-0.06285	0.38938	1.02542	-0.76763	-0.55214	-1.01292	-0.50548	0.62166	0.27321	0.17555				17.7	2.79475	4.31338	3.61148	4.82265	4.39589	4.22556	3.18479	4.78706
	17.8	12.4838	10.8967	8.8574	9.8627	12.1252	10.6887	11.5786	12.509	10.8846	8.95543	12.4663	10.9854	12.315	11.0514	10.1737	10.8746				17.8	0.22174	0.34171	0.25379	1.34137	0.91595	-0.5493	-1.1702	0.60097	0.90562	-0.06513	0.33157	-0.74896	0.06073	1.48507	0.51368	-0.1165				17.8	1.96485	4.97865	3.83336	4.88849	4.69491	3.6258	3.44295	5.04702
	17.9	12.1838	10.358	8.76677	10.3247	13.1745	9.80231	11.691	12.9015	10.0877	9.12617	12.6322	11.0893	12.3473	10.6921	10.3637	10.205				17.9	0.0928	0.29452	0.46716	1.18703	1.22039	0.07057	-1.87902	0.73604	0.70774	0.7853	0.80884	0.04264	0.53063	1.61082	0.17436	-0.49993				17.9	1.72932	5.34635	3.79882	4.50589	4.4959	3.66228	3.47074	4.96616
	18	12.832	9.90177	9.22804	11.1251	13.1608	9.38335	11.924	12.7498	9.39967	9.56056	12.9725	11.8678	12.4422	10.9428	10.3735	9.99839				18	-0.54596	0.23643	0.66525	0.95576	0.94691	0.41942	-1.90053	0.90324	0.68396	1.34509	0.40372	0.46893	0.71544	1.16287	-0.4708	-0.80944				18	1.63291	5.08401	3.58194	3.7866	4.15986	4.85955	3.37239	4.40431
	18.1	14.1661	10.0373	10.0238	11.6988	12.5511	9.50806	11.9298	12.077	8.83409	9.64266	13.328	12.8344	12.3848	11.5419	10.4392	10.2982				18.1	-1.26536	0.51721	0.62155	0.77103	0.32261	0.25119	-1.4556	1.09296	0.59375	1.33918	-0.28268	0.31586	0.60286	0.81372	-0.98129	-0.63816				18.1	1.92561	4.5117	3.34842	3.09207	4.45974	5.84761	3.41012	3.64582
	18.2	15.4287	10.7657	10.8001	11.8189	12.0843	9.71347	11.8656	11.5138	9.27712	9.66294	13.5615	13.3068	12.2559	11.8986	10.4615	10.8697				18.2	-1.43767	1.02707	0.02132	0.77856	0.08602	-0.27769	-0.67714	0.90753	0.29225	0.86359	-0.44628	-0.01493	0.13495	0.89876	-1.2481	0.02294				18.2	2.69308	4.18946	3.03553	2.50761	5.41447	5.52717	3.77747	3.43127
	18.3	15.8209	11.6384	11.1744	11.5906	11.8889	9.70251	12.0198	11.2831	11.0349	10.0545	13.8763	13.0726	12.0828	11.6352	10.1706	11.3485				18.3	-1.34108	1.13278	-0.69095	0.99942	0.4201	-0.74907	0.16369	0.09674	-0.18835	0.18836	-0.08076	-0.15932	-0.62399	0.89474	-1.65455	0.63339				18.3	3.06566	3.91821	2.8531	2.20754	6.14396	4.59748	4.27707	4.12414
	18.4	15.3419	12.56	10.9811	11.3588	11.9047	9.36344	12.0243	11.4256	12.8242	10.7318	14.0736	12.4597	11.6996	11.2504	9.74226	11.7035				18.4	-1.49777	0.56282	-0.71779	1.2633	0.92742	-0.88705	0.62897	-0.58862	-0.9907	-0.4155	0.36815	-0.144	-0.96724	0.33778	-2.25	0.86621				18.4	2.89571	3.37958	3.11414	2.44797	6.05634	4.11499	4.56624	4.89474
	18.5	14.7177	13.4406	10.4902	11.1413	12.3245	8.76709	11.6837	12.1148	13.4963	11.4873	13.8882	12.104	11.2149	11.3219	9.60177	12.0094				18.5	-1.5414	-0.10779	-0.21003	1.35205	1.37696	-0.77155	0.69918	-0.23942	-1.84602	-0.72245	0.63204	-0.29642	-0.21915	-0.41035	-2.25504	0.76274				18.5	2.72215	2.96355	3.7692	3.02931	5.39766	3.94162	4.54802	4.61958
	18.6	14.1649	13.7436	10.2942	10.828	12.987	8.38671	11.4251	12.8133	13.0961	11.9588	13.3675	12.4678	11.1066	11.6195	9.80332	12.0111				18.6	-1.07107	-0.36677	0.30637	0.86731	1.67756	-0.61415	0.68898	0.56858	-2.16577	-0.61463	0.69595	-0.75953	1.06359	-0.71192	-1.45764	0.41956				18.6	2.55879	3.10305	4.50945	3.73322	4.73864	3.68746	4.14309	3.58986
	18.7	13.5176	13.2917	10.5775	10.7018	13.2818	8.66514	11.3718	12.8545	12.1706	11.7733	12.6717	13.1265	11.7089	11.7767	10.0535	11.5198				18.7	-0.39869	-0.21088	0.47839	-0.02151	1.57272	-0.62895	0.79769	0.73272	-1.84963	-0.2011	0.71098	-1.13807	1.82511	-0.38865	-0.66455	-0.05368				18.7	2.45868	3.61407	4.81337	4.45444	4.51728	3.43723	3.55853	3.0912
	18.8	13.3054	12.7367	10.9445	10.9111	13.1537	9.53384	11.3337	12.5001	11.1553	11.3042	12.0983	13.265	12.5383	11.8185	10.3025	10.862				18.8	0.06149	0.27911	0.27142	-0.37585	0.91552	-0.79641	1.02919	0.36114	-1.11678	0.14403	0.5886	-0.9446	1.83966	0.21574	-0.18701	-0.59826				18.8	2.69007	4.00892	4.3376	4.98182	4.40713	3.32275	3.36514	3.34833
	18.9	13.9051	12.8516	10.9052	11.1783	13.1075	10.5335	11.4594	12.2778	10.615	11.1737	11.8656	12.8625	12.7406	11.9804	10.847	10.7254				18.9	0.26473	0.87254	0.06716	0.093	0.18704	-0.96293	1.08652	0.21807	-0.18581	0.26805	0.11878	-0.24632	1.38503	0.6328	0.12339	-0.88701				18.9	2.97256	4.08721	3.51942	5.1914	3.94559	3.37951	3.73711	3.68713
	19	14.4427	13.3206	10.2048	11.3538	13.0474	11.0136	11.9605	12.2837	10.9678	11.1856	12.1438	12.7734	12.4996	12.3153	11.6645	11.3882				19	0.41215	1.16975	0.02744	0.76555	-0.15797	-0.88451	0.64545	0.53299	0.47767	0.23057	-0.31978	0.38654	0.65881	0.68901	0.09194	-0.53872				19	2.92449	3.9262	3.15758	5.09446	3.53586	3.79815	4.26999	3.98282
	19.1	14.1561	13.1542	9.48628	11.6075	12.4207	10.5597	12.6428	12.5455	11.9685	10.8823	12.9332	13.3527	12.5829	12.4475	12.1619	12.0139				19.1	0.71371	0.95288	-0.04636	1.14076	-0.39329	-0.09551	0.09944	1.09015	0.36726	-0.05709	-0.18425	0.4175	-0.01542	0.36146	-0.08689	0.18126				19.1	2.72837	3.68923	3.37473	4.58936	3.41215	4.55554	4.63703	4.44485
	19.2	13.6587	12.323	9.77065	11.962	11.4192	9.51126	13.1633	13.0156	13.0008	10.4562	13.7266	13.7805	13.0995	12.1425	12.0209	11.5158				19.2	0.93337	0.42869	-0.13435	1.24227	-0.68008	1.18624	0.14829	1.56876	-0.28952	-0.72192	0.19897	0.00929	-0.20996	-0.25687	0.08771	0.63065				19.2	2.73986	3.44852	3.89167	3.50558	3.24102	5.11019	4.9014	4.94017
	19.3	13.7425	11.6666	10.65	12.0879	10.8364	8.76336	13.2786	13.335	13.5392	10.2071	14.0816	13.5218	13.7223	11.6473	11.559	10.0693				19.3	0.61464	0.06345	-0.13538	1.22673	-0.60643	1.80831	0.81827	1.69317	-0.74127	-1.54895	0.17658	-0.16649	0.00147	-0.77871	0.51373	0.46401				19.3	3.07374	3.14992	4.60132	2.4135	3.38035	5.21558	5.20011	5.04554
	19.4	13.9367	11.6445	10.9021	11.7437	10.7378	8.93055	13.0222	13.1088	13.4008	10.0074	14.0327	13.1285	14.1067	11.2458	10.978	8.81852				19.4	-0.20391	0.06595	-0.16147	0.92049	-0.05363	1.29008	1.45897	1.40646	-0.88583	-1.93555	-0.09034	0.04042	0.07392	-0.99688	0.57269	-0.20273				19.4	3.59393	3.05967	5.05047	2.05087	4.13385	5.16413	5.29105	4.68704
	19.5	13.6105	11.8987	10.445	11.1942	10.5542	9.57796	12.6391	12.393	12.9056	9.97135	13.7343	13.0954	13.9455	11.315	10.1064	8.38832				19.5	-1.03907	0.15583	-0.26905	0.22345	0.56509	0.29083	1.27579	0.89833	-1.1362	-1.65642	-0.01994	0.44485	-0.10539	-1.15618	-0.03074	-0.86976				19.5	4.06244	3.32491	4.92002	2.35966	4.65525	5.06994	4.61543	4.1287
	19.6	13.2092	11.8753	9.91929	10.8703	10.1595	9.62436	12.2614	11.7797	12.6199	10.4407	13.3852	13.0956	13.4972	12.1539	9.14724	8.61883				19.6	-1.61146	0.01173	-0.45644	-0.40143	0.97316	-0.36348	0.18684	0.4974	-1.28444	-1.11312	0.36389	0.89171	-0.19195	-1.2977	-0.99616	-0.9304				19.6	4.37218	3.56207	4.96745	2.82662	4.39607	4.5168	3.1611	3.46878
	19.7	13.3062	11.6041	9.68555	11.0381	9.86435	8.94452	11.9187	11.469	12.6594	11.0615	13.1143	12.8798	13.443	13.1504	8.75515	9.20771				19.7	-1.8237	-0.29468	-0.5774	-0.55972	1.27077	-0.08738	-0.82531	0.36439	-0.96696	-0.65999	0.56321	0.97634	0.01525	-1.12575	-1.82023	-0.33917				19.7	4.43975	3.52218	5.51678	2.99915	3.92839	3.4406	1.75292	2.77785
	19.8	13.647	11.423	9.78656	11.6162	10.0317	8.47981	11.6271	11.1722	12.5431	11.1743	12.9185	12.8539	13.4907	13.3944	9.2567	9.67117				19.8	-1.61576	-0.50763	-0.32153	-0.38041	1.48374	0.64226	-1.10856	0.43982	-0.53121	-0.22885	0.38845	0.64543	0.3627	-0.56636	-1.87776	0.18739				19.8	4.21121	3.39026	5.68881	2.77136	3.72485	2.48473	1.36195	2.20912
	19.9	13.7107	11.5487	9.9281	12.1069	10.6686	8.60904	11.4608	10.9948	12.0684	10.6591	12.8586	13.1933	12.7623	12.9604	10.2706	9.79525				19.9	-1.15814	-0.47793	0.00937	-0.000153705	1.39784	0.79237	-1.15541	0.60042	-0.44793	0.25586	0.0975	0.4182	0.66281	0.07038	-0.9788	0.24946				19.9	3.81005	3.42266	5.20142	2.48296	3.83448	2.05467	2.02925	1.8404
	20	13.478	12.1924	9.61341	12.0534	11.3152	9.04935	11.6034	10.9614	11.7105	10.0073	13.0299	13.4316	11.5899	12.5722	11.0137	10.13				20	-0.6959	-0.307	-0.15306	0.3078	1.11574	0.43911	-1.38752	0.7069	-0.69523	0.53497	-0.21305	0.34766	1.02026	0.44749	-0.04951	0.22373				20	3.36459	3.44563	4.67127	2.82385	4.16583	2.18286	2.88722	1.3947
	20.1	13.4284	13.1315	8.88389	11.6088	11.7002	9.53149	12.1833	10.7583	11.7124	9.78122	13.3089	13.3283	10.9914	12.6048	11.0542	10.9471				20.1	-0.44253	-0.13116	-0.49763	0.03786	0.97116	0.38672	-1.40306	0.66572	-0.8259	0.46745	-0.61501	0.07253	1.34254	0.45546	0.20142	0.43212				20.1	3.16322	3.06513	4.367	4.24857	4.52499	2.83705	3.20493	0.89428
	20.2	13.7145	13.5898	8.4764	11.1361	12.0341	9.72905	12.9795	10.4592	11.6144	10.1755	13.3602	12.957	11.0944	12.76	10.3854	11.7343				20.2	-0.66356	0.18236	-0.51109	-0.63204	0.98776	0.75597	-0.83387	0.55902	-0.49137	0.15853	-0.65859	-0.36612	1.26454	0.08657	0.15899	0.85127				20.2	3.52398	2.48865	4.14339	5.81672	5.03574	3.50696	3.14306	1.19227
	20.3	13.9149	13.4022	8.70636	10.7076	12.2571	9.50481	13.4194	10.2687	11.2347	10.8682	12.9796	12.4794	11.5838	12.4463	9.25084	12.1298				20.3	-1.4262	0.69528	-0.3289	-0.89446	0.86588	0.96305	0.09415	0.47013	0.04882	-0.27635	-0.17168	-0.71416	0.78982	-0.40302	0.17063	1.30301				20.3	4.04365	2.37797	3.79538	6.19534	5.79157	3.50386	3.49135	2.50045
	20.4	13.9212	13.1204	9.03988	10.486	11.862	9.23922	13.2783	10.0107	11.2438	11.245	12.3363	12.3846	12.3354	11.6751	8.52348	11.9697				20.4	-2.28182	1.05285	-0.15744	-0.55825	0.47977	0.67415	0.81559	0.27327	0.2665	-0.56241	0.1748	-1.02525	0.44004	-0.49175	0.2156	1.63332				20.4	3.96547	3.04836	3.41067	5.51491	6.18318	3.00551	4.47481	3.77246
	20.5	14.0169	12.9657	9.15906	10.7724	11.0427	9.35297	13.1474	9.65599	12.0571	11.0897	11.7915	12.9136	12.9522	11.1576	9.00699	11.1839				20.5	-2.59076	0.87473	-0.12132	-0.06118	0.0727	0.19711	0.9175	0.02761	0.12448	-0.56171	0.29482	-1.29135	0.52354	-0.09823	0.23539	1.69469				20.5	3.35624	4.2481	3.13623	4.76905	5.49434	2.75398	5.39204	4.41239
	20.6	14.297	13.0024	9.3223	11.6696	10.6758	9.94605	13.343	9.63441	13.093	11.0088	11.5111	13.4344	13.0725	11.1467	10.1675	10.1915				20.6	-2.20751	0.3274	-0.48368	0.31514	-0.2772	-0.03596	0.43656	0.02136	-0.04967	-0.58777	0.60526	-1.11568	0.75207	0.41517	0.07341	1.44098				20.6	2.50243	5.32679	2.84804	4.60113	3.93546	3.10925	5.50614	4.63798
	20.7	14.7527	13.3807	9.88489	12.6166	10.9952	10.8553	13.3353	10.0644	13.7252	11.366	11.5768	13.4643	12.7601	11.2556	10.8566	9.56035				20.7	-1.50261	-0.1763	-1.13935	0.47805	-0.67853	-0.03252	-0.33592	0.20716	-0.03407	-0.77758	0.83073	-0.5161	0.83731	0.84312	-0.28941	1.18292				20.7	1.55778	5.53739	2.61689	4.89132	2.8339	3.88014	4.92476	4.34906
	20.8	15.2072	13.5968	10.7697	12.7114	11.5124	11.7611	12.7734	10.7455	13.9397	11.553	12.0086	13.2568	12.5147	11.3467	10.8011	9.36599				20.8	-1.027	-0.5482	-1.40593	0.17239	-0.86597	0.17155	-1.23343	0.42052	0.32718	-0.7095	0.65224	-0.18126	0.83117	1.17432	-0.52631	1.11653				20.8	1.03401	4.78515	2.89181	5.11304	3.10304	4.64139	4.26208	3.57105
	20.9	15.3594	13.0981	11.3712	12.2312	11.8277	12.1885	12.0562	11.7396	13.9761	11.3472	12.4572	12.8267	12.7124	11.4259	10.5465	9.41754				20.9	-0.95548	-0.63035	-0.86263	-0.50755	-0.51204	0.67063	-2.00261	0.71508	0.96627	-0.2741	0.19446	-0.36619	0.83785	1.35838	-0.35489	1.0046				20.9	1.08336	3.96698	3.90737	5.28715	3.96967	5.19762	3.90823	2.94109
	21	15.1972	12.3443	11.3823	11.963	11.8585	11.9478	11.7186	12.7487	14.0042	11.2735	12.5672	12.2357	13.0177	11.4458	10.411	9.87868				21	-1.05233	-0.25971	0.16344	-0.86057	0.14881	1.20427	-2.13321	0.97689	1.42983	0.05136	-0.46899	-0.57615	0.83359	1.28948	0.07807	0.53042				21	1.49824	3.76086	5.06716	5.40872	4.3011	5.64726	4.04125	2.585
	21.1	14.8097	11.9641	11.0959	11.4648	11.5898	11.4298	11.8812	13.0025	14.0655	11.3851	12.3773	12.0489	12.9788	11.5847	10.3418	10.7652				21.1	-1.24919	0.23958	1.14812	-0.48667	0.62138	1.29798	-1.49286	1.03099	1.56665	-0.00814	-1.14422	-0.45306	0.79174	0.95023	0.49085	-0.189				21.1	2.26936	3.93313	5.41792	5.15546	3.78699	6.18082	4.41392	2.13009
	21.2	14.3066	11.8556	10.8402	10.7224	11.0145	11.1081	12.3243	12.4176	13.9399	11.3069	12.0246	12.2569	12.7541	12.0039	10.4835	11.4662				21.2	-1.3227	0.56395	1.65029	0.21137	0.69138	0.78635	-0.72209	1.05614	1.63539	-0.26589	-1.37399	-0.13479	0.66073	0.54623	0.64882	-0.69005				21.2	3.11165	4.32865	4.88851	4.99458	2.72918	6.79852	4.34933	1.77768
	21.3	13.6805	11.6983	10.7318	10.9356	10.5012	11.007	12.565	11.6901	13.305	11.0749	11.6307	12.3435	12.6874	12.5018	10.8108	11.5088				21.3	-0.90857	0.73837	1.416	0.63555	0.53935	0.18825	-0.34855	1.1718	1.59206	-0.24069	-1.07032	0.19704	0.28128	0.19085	0.40566	-0.88387				21.3	3.30086	4.70208	4.39227	5.36641	1.96573	7.18783	3.65516	2.02684
	21.4	12.806	11.6993	10.7569	12.0919	10.7442	10.8677	12.1801	11.4946	12.1336	11.054	11.5142	12.4494	12.4494	12.7594	10.9185	11.0525				21.4	-0.26835	0.84284	0.90738	0.75035	0.45484	0.01326	-0.18547	1.19738	1.21831	0.23463	-0.61368	0.43639	-0.24906	0.01724	-0.20464	-1.06567				21.4	2.56347	4.52993	4.2204	5.63078	2.02799	7.1954	3.07491	2.6038
	21.5	11.9285	12.2026	10.6689	12.8582	11.5654	10.5164	11.4925	11.7235	10.9004	11.3899	11.7345	13.0619	11.6865	12.806	10.5915	10.5346				21.5	0.04744	0.84536	1.00144	0.83793	0.54715	0.09903	0.12029	1.17379	0.61371	0.69483	-0.38431	0.42462	-0.47306	0.19352	-0.96102	-1.10819				21.5	1.64025	4.00692	3.84905	5.2063	2.73933	6.61814	3.21366	2.91785
	21.6	11.6055	12.8083	10.0271	12.8391	11.8343	9.98141	11.3078	11.6688	10.3651	11.732	11.8511	13.9496	10.8044	12.7025	10.008	10.264				21.6	-0.05469	0.65377	1.6903	0.78589	0.80122	0.25291	0.53691	1.09469	-0.01253	0.78717	-0.47533	0.0038	-0.31791	0.44261	-1.42056	-0.65354				21.6	1.22136	3.74608	3.25214	4.24334	3.66447	5.07912	3.53165	3.13377
	21.7	12.0258	12.7215	8.98338	12.8365	11.4102	9.63013	11.8676	11.3424	10.5533	11.6457	11.5973	14.4059	10.3235	12.3465	9.65598	10.453				21.7	-0.20548	0.35305	2.07751	0.33813	1.00731	0.42327	0.58775	0.90477	-0.4646	0.56614	-0.78469	-0.54326	-0.15052	0.407	-1.30608	0.13055				21.7	1.21209	3.82607	2.97523	3.19878	4.18561	3.42354	3.50401	3.5416
	21.8	12.8683	11.7446	8.37386	13.1921	11.0856	9.79695	12.7627	11.4286	10.5407	11.1253	11.0681	14.119	10.4974	11.8041	9.88401	11.0204				21.8	-0.24706	0.24428	1.67221	-0.38712	0.88526	0.57359	-0.0943	0.76552	-0.38089	0.11663	-1.048	-0.77456	0.072	0.19633	-0.90733	0.7642				21.8	1.46397	3.75252	3.49358	2.61491	4.07555	3.05594	3.52471	3.82859
	21.9	13.6075	10.5587	8.60356	13.4682	10.9995	10.1331	13.3873	11.772	9.9723	10.7914	10.8067	13.4321	11.1352	11.3233	10.3768	11.2968				21.9	-0.3717	0.35697	0.87282	-1.05183	0.44391	0.77417	-1.09764	0.68854	0.09941	-0.40405	-0.81414	-0.83403	0.49635	0.12046	-0.45135	0.79092				21.9	1.89237	3.49288	4.77213	2.7548	3.56518	4.04447	3.74576	3.766
	22	13.9166	10.13	9.20733	13.4883	11.0682	10.1468	13.1953	11.6793	9.44539	11.3076	11.3707	12.8345	11.5514	11.1243	10.5444	10.8555				22	-0.4852	0.32897	0.35559	-1.25224	-0.06872	0.86011	-1.67056	0.48798	0.4291	-0.72867	-0.07566	-0.89768	0.71665	0.35108	0.0628	0.12411				22	2.19655	3.55609	6.14379	3.23951	3.09234	5.3949	3.96029	3.5025
	22.1	14.2169	10.495	9.68067	13.5301	11.3775	9.6688	12.5	11.6415	9.34093	12.3617	12.1301	12.5406	11.4384	11.1838	10.3806	10.2041				22.1	-0.22271	0.10007	0.32517	-0.85652	-0.41144	0.60931	-1.55102	0.12604	0.72748	-0.81657	0.54069	-0.67329	0.28916	0.66374	0.36935	-0.54898				22.1	2.37144	3.8578	6.81248	3.65266	3.22071	6.04046	4.24745	3.20874
	22.2	15.015	11.0911	10.065	13.7675	11.6033	8.85686	12.1686	12.4075	9.69849	12.9009	11.9806	12.4634	11.0927	11.1859	10.6693	9.84104				22.2	0.4545	-0.08638	0.4857	-0.29248	-0.56635	0.29666	-0.93176	-0.28085	1.06906	-0.8654	0.74695	-0.12717	-0.55832	0.7541	0.37272	-0.57084				22.2	2.7445	4.02101	6.29552	4.02392	3.94721	5.48355	4.65461	3.20072
	22.3	15.9052	11.6539	10.4288	13.6246	11.4228	8.45587	12.1925	13.2371	10.4081	12.5509	11.3285	12.2526	10.8678	11.2185	11.9222	9.68484				22.3	1.04273	-0.17637	0.5097	-0.13851	-0.70924	0.33276	-0.09972	-0.51074	0.98703	-0.90962	0.75817	0.29282	-1.07585	0.67232	0.42346	-0.10859				22.3	3.19754	4.23791	4.97427	4.28644	4.64025	4.30457	4.86368	3.70783
	22.4	16.0329	11.7841	10.7195	12.4294	11.2831	8.92481	11.9771	13.2689	10.9793	11.9799	11.3687	11.7711	10.9769	11.787	13.4433	9.51642				22.4	0.86557	-0.17152	0.30861	-0.50406	-0.88752	0.76921	0.42003	-0.28857	0.61419	-0.75174	0.74529	0.3308	-0.88135	0.65854	0.48926	0.39745				22.4	3.34156	4.62723	4.10793	4.29837	5.04872	3.4206	4.675	4.25278
	22.5	15.3498	11.3422	11.0175	10.8707	11.6429	9.78529	11.4622	12.8118	11.0676	11.7806	12.2576	11.3809	11.368	12.6199	13.8916	9.3674				22.5	-0.01042	-0.07724	0.10505	-0.85373	-0.8307	1.1024	0.28815	0.25113	0.56578	-0.36219	0.7397	0.04412	-0.48634	0.79105	0.11965	0.76723				22.5	3.35688	4.85259	4.40748	4.27078	5.23873	3.06474	4.4426	4.31001
	22.6	14.5173	11.108	11.3094	10.1799	11.9912	10.2441	11.208	12.0468	11.1204	11.7	13.3786	11.5564	11.7057	12.832	12.7821	9.49433				22.6	-0.61084	-0.11912	0.17011	-0.52533	-0.18649	0.83887	-0.26292	0.65426	0.95177	-0.025	0.80766	-0.33984	-0.55163	0.76584	-0.48509	1.0144				22.6	3.5814	4.6	5.17878	4.28123	4.9418	3.09134	4.40774	4.22993
	22.7	13.8629	11.3943	11.4455	10.4848	11.8855	10.1012	11.5987	10.9641	11.735	11.2715	13.9381	12.3361	11.7952	12.3781	11.1767	10.0139				22.7	-0.37636	-0.21636	0.42605	0.35392	0.68816	0.2952	-0.78986	0.63505	1.30934	-0.06434	1.05052	-0.44282	-0.81948	0.47527	-0.73005	1.17471				22.7	3.76474	3.83361	5.56266	4.39138	4.05877	3.43831	4.5416	4.49152
	22.8	13.552	11.495	11.286	11.1092	11.7269	9.74397	12.3832	10.3637	12.5167	10.7524	13.4779	13.2407	11.6264	11.9242	10.4039	10.6663				22.8	0.20518	-0.21854	0.71047	1.12029	0.99611	0.03112	-0.91819	0.17086	1.23731	-0.41263	1.35002	-0.13556	-0.64495	0.5091	-0.66095	1.13494				22.8	3.63738	3.03835	5.48849	4.66437	3.05872	3.74477	4.59649	4.61722
	22.9	13.8314	11.3188	11.031	11.6321	11.829	9.38636	13.125	10.6445	12.6308	10.7453	12.7206	13.7232	11.0057	11.8127	10.7083	10.9806				22.9	0.64716	-0.32873	1.0763	1.52266	0.67654	0.00514	-0.56994	-0.29179	0.88774	-0.8397	1.30143	0.37411	-0.11661	1.0604	-0.60814	0.78336				22.9	3.41898	2.98885	5.08093	4.69819	2.31794	3.48705	4.13035	4.01389
	23	14.3893	11.3132	11.0667	12.3126	11.9431	8.9395	13.4847	10.9986	11.9765	11.2904	12.7073	13.6077	9.99096	11.992	11.3413	10.6467				23	0.96888	-0.46794	1.33289	1.52842	0.14156	0.0743	-0.01778	-0.16969	0.77139	-1.3399	0.7184	0.83963	0.3391	1.37263	-0.57516	0.31353				23	3.23584	3.92346	4.56016	4.06065	1.98316	2.90815	3.5767	3.15771
	23.1	14.533	11.2102	11.3157	13.2922	11.6401	8.76607	13.2333	10.9785	11.2064	11.9793	13.2076	13.2416	9.22863	12.4268	11.6077	9.98204				23.1	0.88255	-0.52497	1.08198	1.01677	-0.26052	0.39563	0.42416	0.5683	0.90052	-1.64584	-0.01306	0.85229	0.79916	1.06181	-0.55503	0.06134				23.1	2.89916	5.01106	4.48219	3.1304	2.34268	2.71722	3.84435	2.91895
	23.2	14.0506	10.7595	11.4654	13.9642	11.0212	9.25789	12.8087	11.166	10.8721	12.5515	13.264	13.1212	9.42921	13.176	11.3493	9.66829				23.2	-0.11126	-0.71358	0.35915	0.17281	-0.16279	0.69236	0.47461	1.32081	0.76582	-1.39668	-0.38753	0.23368	1.42365	0.52221	-0.42586	0.19621				23.2	2.70073	4.82839	4.83007	2.69055	3.32407	3.16495	4.73752	3.3972
	23.3	13.3951	10.2945	11.6923	13.7374	10.7123	9.99167	13.031	11.8505	10.9831	12.7674	12.7819	13.2336	10.469	13.7548	10.7855	10.0148				23.3	-1.60728	-0.8724	-0.31641	-0.41757	0.28344	0.45253	0.13261	1.4315	0.20125	-1.08548	-0.33231	-0.48963	1.87758	-0.05373	-0.03306	0.52883				23.3	3.15966	3.33821	4.89225	2.88559	4.07379	4.09083	5.28585	3.82154
	23.4	13.1372	10.2195	12.1533	12.9724	11.0247	10.4222	13.7668	12.3796	11.427	12.4838	12.5807	13.1632	11.3987	13.4494	10.2724	10.5524				23.4	-2.46378	-0.75288	-0.37817	-0.32219	0.39996	-0.11215	-0.25937	0.9152	-0.30195	-1.30726	0.08613	-0.75684	1.95158	-0.76099	0.36816	0.57269				23.4	4.01457	2.03414	4.29199	3.07609	4.01199	5.08926	5.1766	3.56426
	23.5	13.2324	10.7334	12.5207	12.6221	11.7773	10.4776	13.9919	12.029	11.8757	11.955	13.0202	12.9223	11.7513	12.5765	9.94825	10.486				23.5	-2.12596	-0.70848	0.24536	0.15785	0.14028	-0.32891	-0.32231	0.288	-0.13275	-1.66749	0.77637	-0.54559	1.81846	-1.39679	0.56324	0.33902				23.5	4.60893	1.87751	3.37074	3.03932	3.47359	5.4651	4.71894	2.8354
	23.6	13.2515	11.4179	12.5078	12.9468	12.6489	10.092	13.3851	11.0655	12.0787	11.628	13.5302	12.7195	12.082	11.981	9.84559	9.66223				23.6	-1.18972	-0.9247	1.07393	0.36825	-0.0351	-0.14239	0.08848	-0.09026	0.60133	-1.42785	1.44498	-0.17356	1.38345	-1.64487	0.58204	0.50857				23.6	4.94101	2.83528	2.76871	3.18633	3.02867	4.77141	4.25198	2.20235
	23.7	13.1913	11.6587	11.9696	13.3135	13.1208	9.33774	12.5932	10.32	12.155	11.5661	13.6144	12.4628	12.831	11.8396	10.0248	8.98141				23.7	-0.55736	-1.18413	1.5344	0.20235	-0.10491	-0.04497	0.78293	-0.25175	1.17918	-0.59256	1.81897	0.12374	0.33603	-1.46298	0.13835	1.20317				23.7	5.41228	4.51191	2.79035	3.49358	3.00145	3.58832	4.1379	2.11233
	23.8	13.3234	11.8423	10.9757	13.1499	13.0835	8.7741	12.0971	10.129	11.9029	11.5345	13.3221	12.1502	13.6657	11.7966	10.3846	9.46198				23.8	-0.38704	-1.25183	1.40358	0.06127	-0.21162	-0.05898	1.41417	-0.38029	1.14479	0.17236	1.69718	0.33377	-1.15905	-0.81267	-0.81957	1.60213				23.8	5.72445	6.11101	3.31485	3.71078	3.35325	3.16732	4.3963	2.65172
	23.9	13.3991	12.6707	10.0041	12.5848	13.0673	8.72235	11.7113	10.3641	11.1681	11.3596	12.976	11.9711	14.0392	11.5155	10.6055	11.0299				23.9	-0.40628	-1.08812	1.02208	0.26877	-0.24424	0.08341	1.73196	-0.55324	0.64042	0.24501	1.12433	0.46468	-2.4064	0.10386	-1.54214	1.45431				23.9	5.22832	6.51135	3.89192	3.60457	3.85822	3.96046	4.7422	3.55867
	24	13.0979	13.815	9.78605	12.2213	13.1331	8.74063	11.2059	10.7786	10.7526	10.9204	12.8869	11.9899	13.74	11.1405	10.6903	12.4609				24	-0.58466	-1.01031	0.77537	0.65933	-0.19204	0.30289	1.73546	-0.64241	0.06202	-0.33875	0.55459	0.60365	-2.67076	0.84379	-1.62943	1.20732				24	4.20982	5.26361	3.8673	3.04131	4.17754	4.90488	4.99787	4.4148
	24.1	12.9121	14.4346	10.4059	12.2205	12.9333	8.27127	10.9466	11.0293	11.2631	10.2505	13.0032	12.4038	12.814	10.9964	10.9162	12.6255				24.1	-0.8508	-1.12269	0.46395	0.60637	-0.1131	0.32687	1.69547	-0.59285	-0.26974	-0.82304	0.15921	0.94607	-1.90252	1.19368	-1.29038	0.78512				24.1	3.4121	3.39375	3.32327	2.57556	4.02106	4.93981	5.02552	4.93311
	24.2	13.3082	14.1384	10.9528	12.2102	12.5732	7.52361	11.3056	10.7943	11.806	9.86456	12.7238	13.3394	11.5396	10.8846	11.1498	11.6691				24.2	-0.94592	-0.88233	-0.03303	-0.0177	0.10894	0.13917	1.56313	-0.57299	-0.12368	-0.71275	-0.39906	1.36809	-0.75917	1.27452	-0.65617	0.20991				24.2	2.948	2.31191	2.98925	2.95499	3.62937	4.28679	4.78306	5.0832
	24.3	13.8293	13.1637	10.8461	11.9989	11.9335	7.26302	12.1309	10.4143	11.4393	10.4126	11.7757	14.4027	10.4811	10.7485	10.9185	10.5578				24.3	-0.8376	-0.04916	0.01417	-0.50931	0.37202	0.04939	0.88967	-0.56295	0.55862	-0.34432	-1.13232	1.64169	0.2243	1.4124	0.03072	0.11165				24.3	2.853	2.14888	3.26258	3.93007	3.38057	3.69371	4.5236	5.016
	24.4	13.8407	12.2106	10.5805	11.6768	10.6572	7.95727	12.8447	10.5134	10.5706	11.691	11.0305	14.8286	9.95868	11.2336	10.2365	9.91257				24.4	-0.59651	0.83855	0.91038	-0.42576	0.54468	0.27668	-0.27799	-0.20742	1.29901	-0.06779	-1.58212	1.69296	0.90869	1.57988	0.43534	0.47343				24.4	3.39294	2.38135	4.15571	4.53146	3.21231	3.71971	4.39222	5.0993
	24.5	13.6576	11.9171	10.6463	11.2238	9.48275	9.15736	13.0063	10.8969	9.8642	12.7818	11.249	14.2542	9.94189	12.4967	9.77072	9.90488				24.5	-0.17479	1.2763	1.64185	-0.16249	0.8276	0.76813	-1.14954	0.58363	1.57677	0.0198	-1.4135	1.34882	1.25066	1.22806	0.48404	0.66614				24.5	4.06327	3.02818	5.27295	4.56157	2.98494	4.43418	4.18718	5.46552
	24.6	13.8446	12.3008	10.7612	10.8329	9.43274	9.89388	12.6139	11.0756	9.62584	12.9277	11.8328	13.1738	10.2415	13.7249	9.92633	10.5209				24.6	0.2176	1.29164	1.50098	-0.20546	1.06158	1.28699	-1.07225	1.25221	1.45111	-0.18869	-0.83358	0.54414	1.17865	0.17912	0.2816	0.60793				24.6	3.78241	3.99915	5.85883	4.80126	2.72914	4.95807	3.85766	5.67155
	24.7	14.127	12.6862	10.5649	10.8648	10.2921	9.89107	12.0234	11.0823	10.0857	12.1652	12.0072	12.3065	10.2651	14.3102	10.4005	11.2372				24.7	0.17699	0.97433	0.95719	-0.56401	0.78202	1.4699	-0.28595	1.21153	1.17973	-0.54394	-0.37127	-0.40399	0.64865	-0.74712	0.14062	0.42331				24.7	2.82885	4.61773	5.45561	5.57395	2.4908	4.67445	3.79364	5.35133
	24.8	14.2216	12.4472	10.2398	11.1367	11.2552	9.66022	11.8607	11.0776	10.9124	11.074	11.9613	12.287	9.7283	14.2646	10.9377	11.4268				24.8	-0.38645	0.33862	0.54098	-0.99321	0.12937	1.22771	0.57789	0.59772	0.75053	-0.78438	-0.11972	-0.92724	-0.16136	-0.78125	0.25251	-0.03254				24.8	2.66871	4.47705	4.64045	6.47512	2.59306	4.11629	4.26488	4.75381
	24.9	14.3321	11.7863	10.0611	11.236	11.9814	9.35516	12.5241	11.0159	11.1308	10.118	12.0075	13.2601	9.48278	13.76	11.55	11.1014				24.9	-0.98709	-0.30527	0.19363	-1.15823	-0.35071	0.76042	1.18768	0.01254	0.20566	-1.04718	0.21457	-0.75056	-0.77999	-0.2314	0.3806	-0.51699				24.9	3.52654	3.79548	4.25914	7.12855	3.41079	3.81841	4.94449	4.29341
	25	14.3336	11.3264	9.99748	11.1749	12.4478	8.81245	13.5598	10.8242	10.5073	9.81844	11.9337	14.0323	10.1724	13.0328	12.1626	10.6393				25	-0.83774	-0.62781	-0.28839	-0.79285	-0.42825	0.25611	1.3796	-0.21488	0.08398	-1.4471	0.853	-0.24628	-0.9315	0.28305	0.2989	-0.57591				25	4.33523	2.94247	4.05797	7.07789	4.59444	3.83994	5.20354	3.92799
	25.1	14.1065	11.4378	9.8509	11.1157	12.4975	8.38161	14.1105	10.6377	10.2283	10.4106	11.9397	13.4962	11.1012	12.2899	12.6013	10.1823				25.1	0.0794	-0.73177	-0.79432	-0.11018	-0.42953	-0.01282	1.02252	-0.09323	0.7115	-1.61473	1.68155	-0.04134	-0.7881	0.4476	0.19484	-0.23636				25.1	4.51354	2.3703	3.7301	6.01011	5.27389	4.13047	4.89518	3.52331
	25.2	13.9909	11.7453	9.42683	11.0098	12.1567	8.44828	13.9441	10.8255	11.1238	11.2691	12.4861	12.4702	11.7038	11.6537	12.5701	9.75487				25.2	0.84859	-0.783	-0.92214	0.14735	-0.84256	0.11038	0.37865	0.0581	1.6105	-1.1205	2.20735	-0.39339	-0.69955	0.1442	0.26004	0.28648				25.2	4.21929	2.62598	3.49801	4.39156	5.36865	4.3796	4.4486	3.21817
	25.3	13.9509	11.5485	8.9489	10.7513	11.8586	8.72093	13.4319	11.4224	12.396	11.816	13.2421	12.1623	12.223	11.242	12.1142	9.53737				25.3	0.80989	-0.67099	-0.57955	-0.33617	-1.56682	0.46015	-0.03258	-0.26319	2.11314	-0.26741	2.12811	-0.74189	-0.86576	-0.31597	0.34858	0.67621				25.3	3.94317	3.55268	3.12702	2.96447	5.53173	4.39458	4.14771	3.186
	25.4	13.6903	11.1459	9.1159	10.179	11.8486	8.6533	12.5957	12.001	12.8362	11.9548	13.5479	12.4136	12.7404	11.0738	11.7857	9.74676				25.4	0.21716	-0.27587	-0.23457	-0.8459	-2.10283	0.92947	-0.08232	-1.07738	2.08348	0.35668	1.52357	-0.3512	-1.0732	-0.49924	0.03326	0.66665				25.4	3.97149	4.40297	2.58486	2.15231	5.49861	4.55007	4.08421	3.46645
	25.5	13.4915	11.3483	10.1161	9.43672	11.9906	8.21387	11.4936	12.2025	12.1898	11.595	13.3227	12.6448	13.0351	10.9571	11.7783	10.344				25.5	-0.20062	0.18678	-0.19471	-0.79177	-2.14862	1.34219	0.11603	-1.66984	1.70347	0.72782	0.63496	0.50371	-1.01914	-0.20575	-0.83652	0.50477				25.5	4.05421	4.58063	2.37843	2.15617	4.61534	4.98109	4.11068	3.68217
	25.6	13.741	12.2072	11.2476	9.10306	12.0627	7.90854	11.028	12.0629	11.2166	10.8488	12.7838	12.6367	13.0499	10.7423	11.6406	10.865				25.6	-0.23545	0.38222	-0.20013	-0.55683	-1.6125	1.34579	0.63489	-1.53332	1.20849	0.98047	-0.01078	0.86608	-0.84535	0.43061	-1.65013	0.39667				25.6	4.09552	4.06096	2.47661	3.07873	3.37979	5.08336	3.80847	3.54452
	25.7	14.3814	13.0774	12.0314	9.31912	11.6534	8.1471	11.6824	11.7951	10.7131	10.2267	12.1779	12.3504	12.8644	10.6729	11.3029	11.1554				25.7	-0.33061	0.24573	-0.05837	-0.38514	-0.58281	1.01681	1.22602	-1.06152	0.86915	1.04153	-0.04443	0.64361	-0.70782	0.80805	-1.7199	0.08777				25.7	4.24613	3.50884	2.49354	4.43415	2.60116	4.75158	3.31291	3.36557
	25.8	15.0485	13.3719	12.5418	9.74424	10.7194	9.09424	12.8437	11.4376	10.7421	10.2671	11.7708	11.9028	12.5638	10.9584	11.3832	11.525				25.8	-0.63782	-0.05539	0.15152	0.06555	0.68279	0.66452	1.25065	-0.6314	0.68809	0.94492	0.20072	0.49066	-0.28409	0.70068	-1.02672	-0.38049				25.8	4.34048	3.46123	2.76779	5.28248	2.29013	4.52574	3.23597	3.43151
	25.9	15.333	13.0198	12.7464	10.0891	10.0825	10.5332	13.9696	11.1404	10.9307	11.1228	11.7007	11.6274	12.2069	11.4017	11.9475	11.7146				25.9	-0.78672	-0.29118	0.53264	0.71707	1.53241	0.37666	0.42025	-0.17537	0.37971	0.66007	0.29785	0.51391	0.46739	0.61404	-0.13503	-0.5993				25.9	4.16657	3.73134	3.99259	5.38802	2.29981	4.39279	3.87732	3.55011
	26	15.3585	12.3516	12.6276	10.363	10.3827	11.5418	14.8894	11.2545	11.1372	12.3065	11.9201	11.8953	11.6943	11.5939	12.5747	11.1743				26	-0.52666	-0.36109	0.96659	1.01049	1.3015	0.09218	-0.74694	0.19846	-0.17446	0.01779	0.37106	0.63696	0.98608	0.94245	0.45766	-0.45506				26	3.69946	3.87934	5.59082	5.36665	2.82783	4.13275	4.90867	3.45144
	26.1	15.6005	11.8705	12.4562	10.7147	11.4344	11.4369	15.3266	11.65	11.4213	13.0475	12.3379	12.5973	11.0302	11.1774	13.0483	10.4184				26.1	-0.20989	-0.39137	0.88689	0.65351	0.36381	-0.26044	-1.26911	0.33004	-0.81345	-0.67744	0.58343	1.00455	1.0683	1.60422	0.76881	-0.20994				26.1	3.28712	3.72809	6.00214	5.87457	3.95666	4.03407	5.5646	3.36899
	26.2	15.9154	11.9907	12.2911	11.0045	12.6851	10.566	14.9771	11.9012	11.3945	12.8295	12.8486	13.1546	10.8306	10.3224	12.9993	10.4313				26.2	-0.04008	-0.49079	0.34916	-0.12526	-0.39872	-0.68336	-0.85671	0.28288	-1.19871	-0.87618	0.76128	1.27835	0.92347	2.13848	1.1155	-0.23904				26.2	3.34814	3.53201	4.84648	6.78476	5.06552	4.02078	5.2235	3.74752
	26.3	15.7442	12.6131	11.7218	10.9721	13.312	9.51613	14.1142	12.0564	10.8984	11.764	13.1041	13.3339	11.5249	9.8338	12.4888	11.2514				26.3	0.35332	-0.58069	0.04513	-0.71952	-0.56375	-1.0078	-0.2465	0.19828	-0.97783	-0.7462	0.71876	1.08849	0.46732	2.08889	1.4801	-0.48132				26.3	3.78913	3.5628	3.32732	7.25044	5.26916	3.40429	4.17868	4.36946
	26.4	15.0754	13.0653	10.8218	10.6133	12.7545	8.5579	13.5312	12.1357	10.6115	10.4269	12.7154	13.3622	12.4315	10.194	12.3029	11.9674				26.4	1.01715	-0.60125	0.21928	-0.78569	-0.33639	-1.05184	0.07637	0.33876	-0.22798	-0.77227	0.52783	0.80283	-0.13053	1.52077	1.42125	-0.50518				26.4	4.0961	3.72786	2.55299	6.42846	4.36695	2.42321	3.44229	4.64208
	26.5	14.4901	13.038	10.2836	10.4602	11.3267	8.03675	13.5353	11.9334	10.8008	9.4273	11.6357	13.3186	12.7071	10.8526	12.6692	11.8449				26.5	1.39565	-0.6695	0.60685	-0.51175	-0.33781	-0.77301	0.33834	0.79547	0.52439	-0.84001	0.37449	0.7968	-0.31537	0.77255	0.92023	-0.22683				26.5	4.01231	3.77114	2.80755	4.48108	3.0465	2.12855	3.42198	4.6045
	26.6	14.4419	12.8761	10.1358	10.9934	10.0438	8.35626	13.8332	11.641	10.8736	9.23994	10.3266	13.1449	12.6319	11.0209	12.8841	11.076				26.6	1.23178	-0.71259	0.79957	-0.27603	-0.87752	-0.26274	0.70996	1.01606	0.9043	-0.74564	0.27396	0.76121	-0.10953	-0.01097	0.64599	0.09836				26.6	3.98314	3.77476	3.89886	3.30227	2.18948	2.54392	3.44982	4.48208
	26.7	14.6621	12.6607	9.98649	11.6046	9.71893	9.01178	13.9566	11.454	10.5439	9.92036	9.57654	12.8616	12.5463	10.7998	12.4869	10.3004				26.7	0.83092	-0.44867	0.45486	-0.25831	-1.51095	0.21111	0.96738	0.65201	0.98519	-0.6533	0.17703	0.44006	0.06631	-0.73784	0.76437	0.16652				26.7	4.24083	3.83902	5.0205	4.15809	1.98039	2.92962	3.12341	4.14533
	26.8	14.5524	12.2411	9.9038	11.4015	10.1993	8.9998	13.7067	11.1882	10.152	11.1365	9.61142	12.4622	12.0863	10.7866	11.7324	9.97352				26.8	0.43341	-0.02755	-0.15101	-0.19318	-1.77171	0.38936	0.82827	0.15253	1.0523	-0.46869	0.07283	0.20786	0.14942	-1.02241	0.79954	-0.12298				26.8	4.33917	3.70026	5.23956	5.4153	2.24917	3.17749	3.03887	3.74746
	26.9	14.0351	11.8825	9.9569	10.6689	10.8595	8.46676	13.5331	11.0793	10.0364	12.2037	10.0057	12.0122	11.2582	11.2366	11.1915	10.4577				26.9	0.11407	0.14169	-0.33243	0.10218	-1.57438	0.23992	0.4248	-0.2008	0.90488	-0.09369	0.02287	0.43039	-0.00688	-0.54642	0.77035	-0.40904				26.9	4.0315	3.60433	4.48876	5.36472	2.83816	3.59847	3.49069	3.90722
	27	13.4545	11.7976	9.87983	10.2153	11.3046	8.06705	13.6449	11.619	10.3292	12.408	10.5249	11.7243	10.5446	11.9264	11.2336	11.6208				27	-0.03196	0.22778	-0.0422	0.4885	-0.80272	-0.06836	0.24695	-0.4535	0.24701	0.04411	-0.0695	0.82688	-0.69145	0.34976	0.85483	-0.38711				27	3.39859	4.12942	3.4488	4.67512	3.54524	4.0756	3.90292	4.80164
	27.1	12.8995	11.8856	9.59975	10.2097	11.3776	7.7649	13.6948	12.4122	11.0463	11.6935	11.0504	11.9336	10.1892	12.3335	11.4998	12.5237				27.1	-0.09204	0.52398	0.24052	0.79817	0.3686	-0.25065	0.53792	-0.44879	-0.35209	-0.1276	-0.42714	0.88976	-1.58579	0.88849	0.84456	-0.38004				27.1	2.81651	4.93816	2.85615	4.24989	4.06635	4.09421	3.97214	5.90869
	27.2	12.3571	12.1959	9.47716	10.3665	11.2239	7.54361	13.583	12.8061	11.7437	10.6433	11.2348	12.6367	10.1336	12.0132	11.4143	12.2958				27.2	-0.14818	0.7824	0.406	0.95096	1.04391	-0.10202	0.83522	-0.20551	-0.36917	-0.10403	-0.88739	0.57577	-1.94186	0.74819	0.7275	-0.93458				27.2	2.69901	5.45869	2.79334	3.75772	4.18101	3.68839	3.94147	6.43313
	27.3	12.1788	12.7874	9.73888	10.3766	11.257	7.76482	13.3627	12.7936	11.7595	9.76144	11.1738	13.1845	10.3939	10.976	10.9212	10.9021				27.3	0.0177	0.71266	0.59111	1.07323	0.45697	0.23271	0.63014	0.03138	-0.40654	0.11017	-1.19189	0.15983	-1.52806	0.36532	0.66236	-1.85115				27.3	2.64228	5.86126	2.95084	3.17225	3.99797	3.76529	4.01017	6.04019
	27.4	12.633	13.4219	10.3699	10.0905	11.6595	8.42644	13.116	12.426	11.1143	9.36484	11.3927	13.1916	11.1284	9.92458	10.2883	9.1277				27.4	0.41715	0.32291	0.71402	1.33325	-0.83095	0.45247	0.12143	0.1915	-0.89038	0.11174	-1.31015	-0.23323	-0.9231	0.22309	0.60958	-2.18492				27.4	2.32219	6.21625	3.14472	3.20355	3.81404	4.54826	4.33573	5.46332
	27.5	13.3584	13.6788	11.2645	9.50715	11.9961	9.12764	12.9618	11.891	10.5874	9.57794	12.0094	13.0247	11.9578	9.66389	9.73678	7.97887				27.5	0.56278	-0.25738	0.55422	1.65982	-1.56722	0.33353	-0.15917	0.22342	-1.17288	-0.20747	-1.33487	-0.47652	-0.6547	0.28741	0.55024	-1.4914				27.5	2.43656	6.0333	3.14026	3.86486	3.89896	5.02428	5.03688	5.24733
	27.6	13.915	13.388	12.0305	8.78957	12.1262	9.44643	12.7738	11.7581	10.8924	10.0665	12.5976	13.0053	12.1589	10.3689	9.69358	7.91645				27.6	0.14466	-0.75271	0.06045	1.75163	-1.41767	-0.19449	0.01027	0.16388	-0.91416	-0.80465	-1.39807	-0.33352	-0.52125	0.28917	0.56327	-0.48304				27.6	3.2633	5.00524	3.02682	4.35199	4.29105	4.72453	5.72982	5.14412
	27.7	14.5534	13.1407	12.2633	8.43012	12.4356	9.01111	12.404	12.0535	11.6184	10.4562	12.555	12.8736	11.909	11.3429	10.407	8.68315				27.7	-0.46735	-0.84639	-0.41094	1.32212	-0.71674	-0.76408	0.38329	0.30655	-0.65531	-1.48448	-1.24363	0.02919	-0.16535	0.26036	0.75338	0.21919				27.7	4.08191	3.63939	3.25093	4.16491	4.61497	4.32559	5.9845	5.0433
	27.8	15.4183	13.5562	11.7954	8.91483	12.9167	8.02782	11.9822	12.1394	11.7992	10.8612	11.6752	12.4891	11.8084	11.7018	11.1963	9.57749				27.8	-0.84643	-0.55428	-0.66801	0.58798	0.15673	-0.79718	0.69906	0.64354	-0.57093	-1.83757	-0.50763	0.24824	0.25561	0.36154	1.03235	0.83406				27.8	4.31671	2.71932	3.70269	3.62812	4.50623	4.34103	5.53683	4.87869
	27.9	15.737	14.0957	10.744	10.1448	13.3466	7.28023	11.7533	11.8817	11.6138	11.5602	10.7259	12.3206	11.7763	11.147	11.3137	10.076				27.9	-0.96466	-0.26941	-0.93341	0.10513	0.77452	-0.35862	1.02788	0.7666	-0.29301	-1.65771	0.46543	0.12331	0.5935	0.51828	0.94264	1.27522				27.9	4.04675	2.36636	3.85551	3.22538	3.9262	4.35893	4.37723	4.28919
	28	15.0604	13.8668	9.74469	11.5987	13.4814	7.23088	11.6543	11.5786	11.7909	12.4716	10.6444	12.7596	11.4737	10.1481	11.1419	10.2662				28	-0.7282	-0.18945	-1.03602	-0.11599	1.05019	-0.07132	1.36973	0.50236	0.13775	-1.25767	1.05741	-0.33785	0.94256	0.68075	0.52416	0.96878				28	3.63448	2.32467	3.75169	3.00516	3.20454	3.64292	3.27346	3.23375
	28.1	14.2255	13.0006	9.31061	12.7027	13.1266	7.52871	11.4153	11.0373	12.1121	13.1293	11.1667	13.5988	11.076	9.76925	11.2105	10.4672				28.1	-0.06163	0.09119	-0.5964	-0.44507	1.19335	-0.07111	1.51609	0.21416	0.4443	-1.07388	1.13259	-0.69382	1.12526	0.9174	0.41114	0.05218				28.1	3.16548	2.61703	3.61578	2.72531	2.86432	2.56842	2.83565	2.53675
	28.2	14.1002	12.3871	9.28973	13.0744	12.6535	7.72536	11.1996	10.2226	11.8895	13.011	11.3171	14.1885	11.2288	10.4085	11.2537	10.8905				28.2	0.6532	0.86057	0.04939	-0.79718	1.09603	0.05703	1.48521	0.19496	0.6826	-1.03582	0.83704	-0.55865	0.9528	1.01681	0.81679	-0.60915				28.2	2.65246	3.37919	3.26803	2.40822	3.11121	2.39628	2.79872	3.26437
	28.3	14.4212	12.0841	9.27024	12.6155	12.5338	7.91385	11.4183	9.88547	11.2444	12.3332	10.7666	14.0988	12.0859	11.0635	11.0138	11.3666				28.3	0.91469	1.47233	0.18851	-0.83792	0.37222	0.37566	1.43135	0.23574	0.86721	-0.86779	0.43777	0.13202	0.70758	0.52294	1.42	-0.57094				28.3	2.76177	4.42623	2.98881	2.527	3.60883	3.14256	2.95382	5.15321
	28.4	14.6317	11.2587	9.20935	11.669	12.6909	8.37066	12.0836	10.3136	10.7953	11.9438	9.95134	13.7927	12.8578	11.0827	10.6437	11.4112				28.4	0.72532	1.40775	-0.22591	-0.4479	-0.67955	0.5076	1.25835	0.24441	0.86957	-0.66488	0.2099	1.03966	0.60173	-0.60608	1.64662	-0.35104				28.4	3.9349	5.04916	3.44542	3.24438	3.87937	3.38196	3.47504	6.5713
	28.5	14.994	10.0159	9.43343	11.027	12.7957	9.05274	12.6393	11.1159	10.6765	11.9778	9.41446	14.048	13.1276	11.0892	10.3133	10.9296				28.5	0.49324	1.04594	-0.51335	0.18507	-1.07113	0.30041	1.07273	0.42936	0.64736	-0.50192	0.10755	1.30924	0.24068	-1.61393	1.19629	-0.37804				28.5	5.23513	4.62012	4.10332	4.20133	3.69752	2.95076	4.25437	6.33677
	28.6	15.9496	9.25982	9.77791	10.9195	12.5575	9.57382	12.4794	12.2775	10.882	11.9322	9.40861	14.8318	13.2465	11.4855	10.1823	10.2789				28.6	0.4546	0.53735	-0.34774	0.63489	-0.5831	0.07839	1.19242	0.51835	0.23303	-0.18085	0.03139	0.73658	-0.53661	-1.78011	0.51722	-0.36705				28.6	5.31606	3.40754	3.93623	4.99118	3.48798	3.12917	4.54294	5.02559
	28.7	16.8032	9.31508	9.97397	10.7698	11.8208	9.61597	11.9026	13.6382	11.4374	11.7729	9.83603	15.1561	13.2818	11.7641	10.468	9.8649				28.7	0.62074	-0.27052	-0.08414	0.71462	0.0651	0.2439	1.36165	-0.01481	-0.0077	0.15426	0.14497	0.33797	-1.21031	-1.38206	0.06382	-0.18759				28.7	4.26512	2.24136	3.33148	5.14315	3.86752	3.95253	3.90134	4.00614
	28.8	16.6306	10.0317	10.1527	10.3698	10.8342	9.41338	11.7339	14.2799	12.0209	11.7098	10.6016	14.2832	13.084	11.6881	11.1408	9.82579				28.8	1.0011	-1.12595	0.02691	0.67377	0.31372	0.65862	1.19234	-0.79376	0.19206	0.32756	0.6199	0.69022	-1.41834	-1.09816	-0.01039	-0.03366				28.8	3.26562	1.76445	3.48575	4.3235	4.31456	4.45829	2.93026	3.62149
	28.9	15.7506	10.8545	10.4844	10.1363	10.2948	9.30045	12.1381	13.9018	12.397	11.4875	11.4549	12.8627	12.8398	11.705	11.7591	9.88123				28.9	1.17677	-1.55343	-0.00667	0.61688	0.22763	0.87321	0.7123	-0.97696	0.57809	0.54798	1.26945	1.19288	-1.30739	-1.02062	0.59288	0.11142				28.9	2.88559	2.18938	4.51901	3.16926	4.04405	4.73009	2.35682	3.42922
	29	15.0499	10.9764	10.9274	10.519	10.7736	8.96535	12.7897	13.3151	12.6	10.9844	11.9552	12.0261	12.862	11.9735	12.0915	9.94862				29	0.63426	-1.24973	-0.05222	0.455	0.19095	0.90286	-0.00463	-0.49671	0.97584	0.71723	1.3902	1.44627	-0.96845	-0.78823	1.63163	0.45138				29	3.07737	3.12748	5.37593	2.69943	3.54317	5.27219	2.26435	3.37285
	29.1	14.9061	10.5591	10.9735	11.375	11.8242	8.0161	13.4335	12.9469	12.3904	10.6657	12.1399	11.784	13.0686	12.2055	12.331	10.2409				29.1	-0.29935	-0.46457	0.31152	0.10518	0.38734	0.76048	-0.76951	0.1815	1.33353	0.68242	0.59163	1.5837	-0.36574	-0.14062	2.05086	0.89742				29.1	3.59933	3.92947	5.28429	3.30356	3.56229	5.68071	2.81288	3.84141
	29.2	14.7939	10.4853	10.3376	11.899	12.4017	6.88997	13.7359	12.4684	11.5677	10.8539	11.9334	11.6281	12.8848	12.2369	12.3477	10.4924				29.2	-0.71527	0.21492	1.10103	-0.47133	0.57733	0.14416	-1.17833	0.65323	1.431	0.79296	-0.4198	1.54544	0.31351	0.61661	1.27528	0.71711				29.2	3.999	4.28967	4.62488	4.53591	3.88072	5.46259	4.17423	4.84932
	29.3	14.1974	10.7251	9.51614	11.6076	12.3247	6.40191	13.3718	11.9504	10.5581	11.2102	11.1807	11.5908	12.372	12.1557	11.9428	10.3698				29.3	-0.33269	0.37497	1.40928	-1.01657	0.41671	-0.59752	-1.2176	0.69214	1.11627	1.01818	-0.79552	1.34892	0.77099	0.83147	-0.04927	-0.31945				29.3	4.22714	4.26575	4.08575	5.77957	4.1699	4.88938	5.77284	5.5792
	29.4	13.7439	10.738	9.25345	10.8031	12.3401	6.80406	12.754	11.8441	10.216	11.0355	10.5889	11.7911	12.1503	12.1359	11.4987	10.3589				29.4	0.28851	0.16934	0.72531	-1.13818	-0.06035	-0.84887	-1.10768	0.42653	0.60511	0.78123	-0.57447	1.20306	1.0713	0.37534	-0.78154	-1.2123				29.4	4.53487	3.91771	3.91341	6.49459	4.48671	4.24576	6.83823	5.66565
	29.5	14.1226	10.551	9.73748	10.1577	12.5728	7.65003	12.6207	12.1424	10.8537	10.1733	10.799	12.0528	12.0666	12.2186	11.4433	10.8068				29.5	0.72341	0.02445	-0.29452	-0.87204	-0.27075	-0.65242	-0.84305	0.07285	0.11685	0.06933	-0.24366	0.85254	1.43469	-0.15708	-0.47345	-1.32709				29.5	4.4804	3.51455	3.93559	6.04306	4.84152	3.43435	7.13248	5.57533
	29.6	14.8472	10.4429	10.449	10.3921	12.1366	8.32879	12.9484	12.2747	11.7295	9.57616	11.5033	12.3238	11.6802	12.3897	11.8144	11.1377				29.6	0.73755	0.07299	-0.72611	-0.54857	0.11284	-0.14378	-0.3693	-0.11536	-0.46318	-0.4183	-0.10146	0.05353	1.62335	-0.40586	0.2228	-0.92152				29.6	3.52176	3.30672	3.92082	4.77767	5.25027	2.6885	6.7416	5.33199
	29.7	15.1936	10.4939	10.8717	11.4399	10.9283	8.57769	13.3054	11.9737	11.988	10.076	12.1591	12.6577	11.2091	12.3891	12.318	11.043				29.7	0.05372	0.34934	-0.40218	-0.31367	0.42549	0.63401	0.24119	0.32365	-1.15155	-0.19501	-0.26938	-0.68682	1.38543	-0.53437	0.53414	-0.30059				29.7	2.27254	3.15906	3.87262	3.99816	5.84913	2.46844	5.91153	4.61335
	29.8	15.3351	10.67	11.0951	12.2829	10.1082	8.54396	13.5085	11.9311	11.4306	11.1622	12.5844	12.9157	11.154	11.7613	12.4606	10.9223				29.8	-0.92095	0.66255	0.25553	-0.1865	-0.08737	1.30094	0.74976	1.25641	-1.5615	0.62028	-0.65732	-0.90647	1.03188	-0.53487	0.41251	0.1441				29.8	1.85506	2.98135	3.78656	4.21721	6.55097	2.67415	5.17121	3.64878
	29.9	15.8409	10.8257	11.4041	12.3785	10.2287	8.43202	13.4652	12.4418	10.3967	11.8969	12.6806	12.9623	11.5931	10.7212	11.9743	10.9837				29.9	-1.28156	0.60409	0.80844	-0.20895	-1.12983	1.33997	0.92393	1.80033	-1.25818	1.36019	-0.88386	-0.68409	0.68881	-0.31751	0.03268	0.23437				29.9	2.54906	3.04265	3.59843	5.10272	6.70545	2.71093	4.71688	3.01204
	30	16.5398	10.8613	11.5037	12.0232	10.57	8.31591	13.0664	12.6023	9.41593	12.0865	12.4563	12.7478	11.9615	9.98689	11.0956	11.0579				30	-0.79371	0.18693	0.93393	-0.36037	-1.6666	0.76701	0.8501	1.47245	-0.51237	1.43131	-0.59007	-0.27682	-0.06119	-0.08926	-0.477	0.18326				30	3.68359	3.73799	3.38675	5.94603	5.88438	2.29813	4.09333	3.31768
	30.1	16.7407	11.02	10.9098	11.4357	10.7267	8.29455	12.4327	11.7222	8.97306	12.0896	12.3307	12.2326	12.0276	9.8414	10.459	11.1184				30.1	-0.08896	-0.1841	0.67639	-0.34045	-1.17866	0.17802	0.76681	0.65306	-0.0741	1.01179	0.12474	-3.18922e-05	-1.00676	-0.26739	-0.8541	0.09384				30.1	4.44047	4.67785	3.38258	6.04737	4.80514	1.83371	3.19019	4.55562
	30.2	16.2184	11.4822	9.94598	10.652	11.0619	8.4414	12.0088	10.6222	9.24811	12.2359	12.5668	11.8164	12.3706	10.1184	10.5947	11.1557				30.2	0.19201	-0.48916	0.24597	0.06501	-0.1957	-0.06216	0.78826	0.06975	0.11751	0.68025	0.82654	0.00144	-1.17693	-0.7066	-0.94771	0.03051				30.2	4.49966	4.89579	3.54719	5.42237	4.3393	1.59476	2.63126	5.72658
	30.3	15.2253	12.0811	9.32389	10.1812	11.5423	8.68482	12.1143	10.5529	9.90755	12.4998	12.7544	12.0951	13.3008	10.6302	11.5778	10.8331				30.3	-0.04466	-1.07356	-0.34178	0.28832	0.58717	-0.06298	0.95665	0.11593	0.58498	0.61007	1.30094	-0.21769	-0.38296	-0.76473	-0.93166	0.11067				30.3	4.04329	4.55582	3.46323	4.80388	4.32101	1.63057	2.798	6.23195
	30.4	13.8743	12.679	9.38632	10.4506	11.8232	8.94546	12.7159	11.3465	10.2592	12.2174	12.5257	12.8137	14.2987	11.1821	12.8773	10.0811				30.4	-0.38328	-1.64526	-0.97534	-0.25505	1.05065	-0.0056	1.15039	0.63394	1.08167	0.49333	1.60049	-0.47769	0.44505	-0.42329	-1.09724	0.34348				30.4	3.48694	4.58569	2.92872	5.11867	4.12643	2.028	3.25893	6.35301
	30.5	12.4061	13.1848	10.0835	10.9943	11.8652	9.19576	13.5513	12.0708	9.94747	10.8614	12.0948	13.1571	14.3408	11.4124	13.718	9.46312				30.5	-0.34438	-1.42097	-1.18131	-1.08304	1.20189	-0.1475	1.16197	1.15262	1.27116	-0.0043	1.56515	-0.49972	0.56395	-0.12676	-1.25418	0.56826				30.5	3.10641	4.91157	2.46019	6.18757	3.60568	2.85402	3.59033	6.02561
	30.6	11.7797	13.2655	11.0577	11.2707	11.8319	9.3014	14.0348	12.4073	9.49942	9.21384	11.5988	13.0534	12.9623	11.0684	13.7846	9.51255				30.6	-0.08309	-0.53785	-0.68234	-1.18787	0.98539	-0.77511	1.06802	1.35566	1.3285	-0.72996	0.9925	-0.21401	0.20385	-0.04086	-0.86332	0.55604				30.6	2.69966	4.82218	2.71131	6.64183	3.17959	3.97894	3.72423	5.08789
	30.7	12.6596	12.6015	11.798	11.5757	11.7456	9.10138	13.8757	12.3115	9.46547	8.60528	10.9699	12.9501	11.3015	10.4905	13.2826	9.94019				30.7	-0.17841	0.12877	-0.04121	-0.36084	0.66131	-1.58858	1.09981	1.35848	1.29073	-1.08594	0.12937	-0.00104	0.00304	0.08179	-0.08335	0.38358				30.7	2.14522	4.39593	3.27753	5.90568	3.29021	4.9776	3.767	4.14459
	30.8	14.3779	11.5936	11.9484	12.1417	11.5305	8.69041	13.7845	11.7432	9.75487	9.34708	10.5103	13.0364	10.7647	10.2979	12.4836	9.88952				30.8	-0.46307	0.14111	0.02595	0.72367	0.54045	-1.82818	1.0342	1.08911	1.08807	-0.84166	-0.55609	0.06641	0.14286	0.49467	0.15342	0.23101				30.8	1.8572	4.21612	3.48185	4.70173	3.84825	5.49128	4.08015	3.87754
	30.9	15.9403	11.1233	11.54	12.4706	11.5131	8.43002	14.3449	10.8415	10.2587	10.725	10.7448	13.4845	11.3983	10.5268	11.4884	9.20274				30.9	-0.12118	-0.28447	-0.43451	1.52553	0.40179	-1.41299	0.49612	0.24035	0.82506	-0.40055	-0.88704	0.33505	0.41634	1.01616	-0.44649	-0.03561				30.9	2.11231	4.30392	3.21197	3.59856	4.54256	5.40832	4.62005	4.08758
	31	16.6483	11.2506	11.1974	12.5034	12.1348	8.65732	15.1249	9.99782	10.9386	12.0834	11.6313	14.139	12.5395	10.7055	10.4546	8.87343				31	0.89643	-0.83144	-1.06343	1.94298	-0.09247	-1.06652	-0.16289	-0.78265	0.71212	-0.08623	-0.98276	0.85309	0.65386	1.36023	-0.93415	-0.45939				31	2.6055	4.22578	2.5642	2.81101	4.89252	4.71813	4.77129	4.24439
	31.1	16.2476	11.1997	11.5967	12.6313	12.9339	9.08982	15.52	9.86862	11.4274	12.9768	12.457	14.2408	13.5146	10.8363	9.77633	9.82928				31.1	1.43152	-1.24709	-1.55084	1.79796	-0.72439	-1.07509	-0.4249	-1.24249	0.78693	0.16065	-0.92649	1.46988	0.46305	1.32634	-0.49466	-0.70886				31.1	3.08595	3.62114	1.9524	2.69405	4.77359	3.61299	4.59945	3.90863
	31.2	15.4766	10.7158	12.421	12.5736	13.0589	9.46637	15.323	10.3876	11.5245	12.8858	12.8436	13.3615	13.888	11.1617	9.75681	11.583				31.2	0.78816	-1.27704	-1.34272	0.99337	-0.90759	-0.90783	-0.35894	-1.081	0.64061	0.40234	-0.71432	1.73738	-0.27362	0.97069	0.49494	-0.55347				31.2	3.6804	2.82407	1.85367	3.23636	4.74585	2.85615	4.66085	3.07642
	31.3	15.1665	10.5127	12.6234	12.249	12.3307	10.0353	14.4396	10.7759	11.5697	11.9494	13.0098	12.1151	13.6945	11.4987	10.1152	12.7264				31.3	-0.18277	-0.81049	-0.2901	0.1764	-0.47547	-0.16501	-0.21187	-0.7463	-0.08484	0.62196	-0.46492	1.0867	-0.82219	0.63678	1.14678	-0.18382				31.3	4.19378	2.76951	2.30837	3.77106	4.76194	3.09824	4.45167	2.35417
	31.4	15.2911	11.1421	12.1153	12.2423	11.1025	10.4524	13.2132	10.9474	11.6916	11.0417	13.0363	11.4519	13.1838	11.665	10.3428	12.4819				31.4	-0.40241	-0.12061	0.87417	0.27772	-0.0312	0.66589	-0.08062	-0.54412	-0.93551	0.79101	-0.23384	0.04179	-0.77107	0.37705	1.18586	-0.05211				31.4	4.11812	3.58805	3.08477	3.68994	4.40458	3.88123	3.41923	2.28751
	31.5	15.4472	12.0791	11.5498	12.4726	10.1761	10.1745	12.5517	11.1954	11.6744	10.7037	12.7191	11.5178	12.5915	11.7665	10.4422	11.3228				31.5	0.01664	0.40717	1.30305	1.13169	-0.09922	0.87268	-0.18616	-0.38131	-1.13313	0.7032	0.14644	-0.41768	-0.49857	0.11002	0.97119	-0.52125				31.5	3.81812	4.47411	3.70145	3.0482	3.92038	4.52687	2.38488	2.69369
	31.6	15.4757	12.4873	11.1385	12.2683	10.3743	9.58758	12.9135	11.4301	11.3292	10.7261	12.3253	11.864	11.9556	11.8364	10.5844	10.2748				31.6	0.18401	0.66843	0.81483	1.64263	-0.32291	0.68148	-0.51052	-0.14809	-0.56335	0.3472	0.58644	-0.35032	-0.21723	-0.01471	0.85613	-1.52273				31.6	3.8161	5.1209	3.46788	2.25082	3.65853	4.99684	2.31385	3.14767
	31.7	15.5079	12.1774	10.8974	11.766	11.2782	9.52433	13.7851	11.4534	10.6477	10.7781	12.4341	12.2722	11.1466	11.7209	10.465	9.77807				31.7	-0.09365	0.79572	-0.27974	1.30808	-0.23959	0.75675	-0.60646	-0.01897	0.10598	0.10671	0.72053	-0.20488	0.09922	-0.07487	0.95296	-2.25566				31.7	3.79632	5.83794	2.73331	1.89413	3.74125	5.24073	3.02795	3.66712
	31.8	15.6276	11.4731	10.9281	11.5801	11.6305	10.0978	14.2417	11.2309	10.0053	10.8702	12.8552	12.5176	10.6939	11.2201	9.86462	9.58536				31.8	-0.15367	0.93078	-1.48315	0.54368	-0.0145	0.96411	-0.33639	-0.02326	0.25483	0.13725	0.37794	-0.08655	0.60726	-0.38766	1.08116	-1.96468				31.8	3.68481	6.30593	2.77399	2.37073	4.28204	5.08828	3.85364	4.24151
	31.9	15.5165	10.9006	11.1646	11.7905	11.5227	10.6804	14.1635	10.8842	10.0312	11.1302	12.8084	12.2184	11.3416	10.5671	9.24779	9.635				31.9	0.23356	1.08416	-2.06503	0.12296	0.02003	0.94404	0.07077	0.10947	-0.02879	0.22367	-0.26254	-0.0899	1.48891	-0.79533	1.01057	-0.96927				31.9	3.79682	6.03547	3.83284	3.42717	4.97312	4.79583	4.44123	4.66334
	32	14.8963	10.7893	11.4358	11.9559	11.9999	10.9216	14.0668	10.5742	10.6596	11.4872	12.0731	11.3322	12.5428	10.3005	9.14704	10.1741				32	0.50599	1.09521	-1.68708	0.17899	-0.4134	0.78162	0.49599	0.44288	-0.37748	0.24357	-0.84588	-0.1064	2.33072	-0.82868	0.81593	-0.1476				32	4.02433	5.49351	5.03154	4.58419	5.16489	4.78207	4.73945	4.86031
	32.1	14.1489	10.994	11.6088	11.6539	12.9488	10.8224	13.7202	10.2299	11.2553	11.5286	11.3191	10.3655	13.3606	10.5208	9.51014	10.9919				32.1	0.13979	0.71248	-0.76496	0.09666	-1.3436	0.26849	0.77956	0.7243	-0.71365	0.09337	-1.06609	0.12149	2.39313	-0.31845	0.63079	0.2022				32.1	4.25341	5.55992	5.54758	5.18072	4.78517	5.05611	4.55792	4.75664
	32.2	13.8936	11.229	11.4941	11.2425	13.317	10.4555	12.8597	9.79869	11.6387	11.0486	11.0817	10.003	13.774	10.7739	9.9931	11.2543				32.2	-0.73575	0.0181	0.13349	-0.19722	-2.08286	-0.80996	0.63913	0.74329	-0.87208	-0.28174	-0.75582	0.62406	1.84614	0.32335	0.28866	0.13667				32.2	4.42239	6.10125	5.00838	4.77644	4.54382	5.44833	3.88204	4.27406
	32.3	14.1494	11.3372	11.1653	11.6224	12.7342	10.1401	12.3449	9.73045	11.9654	10.4149	11.2607	10.4199	13.9047	10.8318	10.2369	10.3501				32.3	-1.51575	-0.44408	0.7669	-0.13736	-1.87207	-1.86128	0.1024	0.49571	-0.71382	-0.52315	-0.23902	0.9943	1.51905	0.56862	-0.36806	-0.38447				32.3	4.17167	5.9969	3.99943	3.94423	4.79051	5.6344	3.3388	3.69475
	32.4	14.6941	11.4574	10.9372	12.6489	11.8943	10.0729	12.8623	10.359	12.1307	10.1495	11.8119	11.2585	13.6146	10.9879	10.2876	8.86066				32.4	-1.69958	-0.62001	1.10132	0.42143	-0.88313	-2.24254	-0.29446	0.03232	-0.51727	-0.37103	0.03819	0.64773	1.47561	0.49164	-1.17624	-1.02428				32.4	3.39762	4.99164	3.44208	3.77341	4.74883	5.1008	3.35858	3.57247
	32.5	15.4952	11.8437	10.7038	13.2021	11.3173	10.3046	13.953	11.3611	12.0376	10.5136	12.7044	12.0216	13.0582	11.4339	10.5408	8.22298				32.5	-1.22958	-0.94651	1.08986	0.86512	0.16993	-2.05369	-0.15276	-0.47129	-0.44751	-0.07296	0.19394	-0.2368	1.15717	0.43203	-1.69938	-1.1951				32.5	2.58077	4.14764	3.41785	4.41018	4.01677	3.95018	3.41161	3.94428
	32.6	16.1129	12.25	10.3635	12.9203	10.8038	10.6624	14.9345	12.1313	12.1005	11.3402	13.3149	12.4486	12.6855	11.7364	10.8538	9.12388				32.6	-0.57964	-1.16829	0.85582	0.60819	0.85023	-1.75749	0.22376	-0.64697	-0.35945	0.32355	0.43777	-0.86399	0.41156	0.32356	-1.47032	-0.815				32.6	2.44155	3.96811	3.51446	4.73907	3.32858	3.29041	2.97746	4.10048
	32.7	16.0818	12.1812	10.1557	12.4481	10.2838	10.795	15.4257	12.2035	12.5837	12.1511	13.1002	12.6834	12.7207	11.5383	10.632	10.7725				32.7	-0.39783	-0.93294	0.69474	-0.05414	1.05204	-1.61217	0.46421	-0.47957	-0.26461	0.92465	0.64909	-1.16824	-0.35591	-0.04337	-0.53	-0.16167				32.7	2.98413	3.86914	3.57126	4.2529	3.12673	3.73988	2.39531	3.6974
	32.8	15.7095	11.5488	10.2165	12.241	10.2792	10.7482	15.4046	11.6183	13.064	12.4735	12.4092	12.9371	12.8149	11.2165	9.95581	11.8058				32.8	-0.70772	-0.50056	0.69012	-0.32676	0.7579	-1.37432	0.53827	-0.27851	-0.25899	1.50012	0.85876	-1.50406	-0.80838	-0.41132	0.58586	0.5804				32.8	3.4866	3.54114	3.75229	3.85692	3.27428	4.40111	2.30381	3.30642
	32.9	15.3661	10.6429	10.5045	12.0816	11.0243	10.6217	15.263	10.8987	12.9671	12.2055	11.9599	12.9891	12.4529	10.9715	9.58797	11.6753				32.9	-0.97389	-0.06057	0.80874	-0.13598	0.08067	-0.88959	0.48677	-0.13454	-0.32397	1.89516	1.17079	-1.63907	-0.90545	-0.41967	1.41246	1.24023				32.9	3.62907	3.58831	4.23851	4.09953	3.73756	4.29451	2.79619	3.44568
	33	14.969	9.87131	10.8411	11.6926	11.8282	10.267	15.2192	10.7113	12.2564	11.8039	12.0436	12.4461	11.8829	10.4243	9.76251	11.2049				33	-0.91037	0.4791	0.85199	-0.08377	-0.51168	-0.35734	0.42699	0.18419	-0.34427	1.91468	1.26534	-1.23645	-0.56954	-0.16734	1.67606	1.5594				33	3.35158	4.44612	4.82759	4.44768	4.05125	3.64823	3.44035	3.89558
	33.1	14.6206	9.5508	11.1483	11.2297	11.9566	9.69545	15.0754	11.2837	11.6962	11.6655	12.5655	11.6361	11.6794	9.87092	9.99424	11.2904				33.1	-0.76179	0.95596	0.3589	-0.21038	-0.46404	0.09024	0.56905	0.76519	-0.20463	1.27365	0.88612	-0.55163	0.03149	0.07775	1.46087	1.31566				33.1	2.64048	5.27293	4.87138	4.35168	3.72899	3.03572	3.85468	4.23091
	33.2	14.5358	9.85088	11.5511	11.1284	11.4096	9.37922	14.5852	11.9967	11.6966	11.6577	13.0443	11.2926	11.819	10.2588	10.1793	11.696				33.2	-0.79369	0.95706	-0.67159	-0.16769	0.19715	0.36692	0.7441	1.15765	-0.11395	0.32222	0.2904	-0.15833	0.48482	0.14363	1.06775	0.73781				33.2	1.92054	5.28802	4.30795	3.92762	3.08753	2.65527	4.0514	4.3238
	33.3	14.6871	10.4903	11.9729	11.4919	10.5771	10.0097	13.6218	12.1107	11.524	11.4961	13.0871	11.633	12.1103	11.4576	10.6709	11.7008				33.3	-0.86416	0.51716	-1.60961	0.04161	0.84569	0.45253	0.53281	0.99377	-0.32855	-0.42397	0.04677	-0.27486	0.8013	-0.27566	0.55083	0.31022				33.3	1.76198	4.87931	3.95604	3.57876	2.71713	2.60694	4.30282	4.23285
	33.4	15.1908	10.8454	12.1753	11.9119	9.96331	11.3963	12.5317	11.7587	10.948	11.1439	13.0315	12.2332	12.513	12.2512	11.4646	11.3926				33.4	-0.85986	0.34049	-1.93065	-0.00478	1.06469	0.32587	-0.00487	0.60095	-0.71232	-0.75856	0.39497	-0.54161	0.95424	-1.04579	0.035	0.24716				33.4	2.15141	4.55125	4.18614	3.46082	2.72972	2.90972	4.90014	4.16718
	33.5	16.1731	10.5462	12.26	11.9777	9.85128	12.2903	12.1332	11.6292	10.7484	11.1047	13.2104	12.8084	12.9065	12.186	12.0453	11.1935				33.5	-0.81883	0.66628	-1.49021	-0.60893	0.94333	-0.06565	-0.48953	0.44197	-1.05146	-0.31949	0.83727	-0.53397	0.69948	-1.20208	0.04003	0.34094				33.5	2.84204	4.77192	4.56626	3.50869	3.07843	3.49526	5.63225	4.25801
	33.6	17.0297	9.86824	12.3378	11.7183	9.87463	11.8938	12.6648	11.9303	11.1149	11.6446	13.2784	13.5022	13.3068	11.8937	11.7861	10.8121				33.6	-0.74416	0.87381	-0.47128	-1.26605	0.85312	-0.59482	-0.86256	0.52817	-1.01516	0.76077	0.72958	-0.28653	0.34594	-0.48576	0.52281	0.28798				33.6	3.74544	5.68736	4.61836	3.66455	3.63453	4.11343	5.89733	4.22863
	33.7	17.0761	9.39491	12.286	11.6953	9.77902	10.4284	13.3984	12.2561	11.5822	11.9841	12.9089	13.9987	13.7613	11.8655	10.7905	10.1756				33.7	-0.81445	0.44762	0.45956	-1.24728	0.96434	-1.02401	-1.09289	0.56132	-0.49497	1.42397	0.2028	0.13152	0.25646	0.15345	0.65959	0.21155				33.7	4.63579	6.32138	4.12638	3.90755	3.91935	4.32426	5.489	3.84865
	33.8	16.6499	9.53555	12.2402	12.3931	9.76364	8.5979	13.6137	12.317	11.8487	11.6188	12.2905	13.8445	13.9161	12.0764	10.1199	9.79572				33.8	-1.11008	-0.40287	0.69934	-0.54143	1.10951	-1.04496	-0.78521	0.31489	0.00347	1.14406	-0.08398	0.7063	0.25211	0.23282	0.28459	0.13994				33.8	5.00143	5.95073	3.39991	4.12281	3.91418	4.16305	4.79858	3.63487
	33.9	16.2977	10.2992	12.2038	13.4572	9.73841	7.39752	13.2182	12.2685	11.5915	11.2766	11.8947	13.3077	13.4821	12.2856	10.3889	9.68952				33.9	-1.32497	-0.95573	0.29125	0.28859	1.29545	-0.46033	-0.01298	0.10685	0.21687	0.63225	0.04048	1.01386	0.10577	0.27472	0.05751	-0.1822				33.9	4.48297	5.22464	3.1172	4.36846	4.22189	4.03328	4.30363	4.03628
	34	15.9892	11.1112	11.9827	14.1136	9.46765	7.31927	12.4574	12.1816	10.9598	11.4677	12.0053	12.7006	12.6547	11.8057	11.0932	9.60565				34	-1.03346	-0.65745	-0.18155	0.85554	1.52076	0.46588	0.42466	0.35943	0.28285	0.52234	0.30763	0.73189	-0.06609	0.55656	0.22367	-0.44576				34	3.41161	4.863	3.43857	4.82071	4.94021	4.04663	4.02733	4.58521
	34.1	15.6627	11.368	11.5204	14.0575	9.37173	7.77015	11.7957	11.7925	10.9149	11.6998	12.3923	11.9212	11.8779	10.4507	11.6182	9.87534				34.1	-0.27024	0.32406	-0.12054	1.04045	1.48813	1.14064	0.21799	0.90485	0.15005	0.67961	0.56801	0.28256	-0.03603	0.80107	0.43166	-0.25137				34.1	2.6987	4.51897	3.8291	5.22297	5.51689	4.23046	3.93815	4.71885
	34.2	15.5013	11.0422	10.8432	13.4972	9.91464	8.19634	11.8058	11.2988	11.7835	11.355	12.5627	10.9955	11.5062	9.48578	11.6167	11.0173				34.2	0.2694	1.26564	0.45037	0.71158	1.2704	1.0216	-0.16435	1.29129	-0.31154	0.84574	0.6532	0.25002	0.28145	0.9278	0.38192	0.39146				34.2	2.72692	3.65304	3.89652	5.07426	5.4999	4.68388	3.8743	4.52209
	34.3	15.5646	10.4396	10.3021	12.9767	10.5354	8.64014	12.5777	11.3203	12.6404	10.5508	12.2793	10.4728	11.5167	9.89858	10.7515	12.4996				34.3	0.1418	1.4985	0.9373	0.23159	1.30397	0.17127	-0.22716	1.37873	-0.88369	0.77548	0.36416	0.58718	0.84983	1.08164	0.10381	1.32803				34.3	3.04153	2.69022	4.02455	4.26596	5.04078	5.16911	3.40577	4.3949
	34.4	15.5157	9.9758	10.3316	12.9015	10.5675	9.10018	13.3798	11.9469	12.4962	10.0941	11.7664	10.8685	11.6648	10.8692	9.31729	12.7895				34.4	-0.06237	0.96799	0.85931	0.12292	1.49997	-0.56487	0.20566	1.35947	-1.13597	0.32133	-0.27979	0.76985	1.57691	1.06231	-0.29337	2.03121				34.4	3.52154	2.3082	4.35536	3.18649	4.863	5.03581	3.05325	4.49279
	34.5	14.8745	9.90976	11.0666	13.021	10.1995	9.50656	13.4186	12.7087	11.6709	10.3461	11.3831	12.0342	12.0154	11.1948	8.28324	11.4441				34.5	0.13634	0.24716	0.45015	0.23518	1.52748	-0.64588	1.02914	1.3494	-0.93063	-0.43694	-0.93905	0.37667	2.28182	0.44449	-0.66592	1.93329				34.5	4.2309	2.5316	4.25794	2.3326	5.07258	4.21757	3.75674	4.64262
	34.6	13.8537	10.0263	12.0156	12.9455	9.8642	9.84066	12.7514	12.8941	11.4406	10.8258	11.1854	13.3224	12.6799	10.7718	8.17115	9.95532				34.6	0.25113	-0.15545	0.1216	0.37293	1.36679	-0.499	1.5921	1.30167	-0.47686	-1.13862	-1.06607	-0.52753	2.55602	-0.58615	-0.64548	1.20432				34.6	4.62399	2.91984	3.63459	1.82844	4.87356	3.54888	4.87776	4.62845
	34.7	13.3797	10.0689	12.399	12.8183	9.75082	9.99417	12.0554	12.209	12.2715	11.0068	11.1821	14.1796	13.238	10.027	8.85844	9.50363				34.7	0.00222	-0.10266	-0.13986	0.55492	0.94061	-0.42879	1.20962	1.29404	-0.0692	-1.21861	-0.55639	-1.32126	2.0129	-1.32796	-0.21516	0.48354				34.7	4.42889	2.98307	3.06161	1.60854	4.00603	3.40604	5.174	4.35686
	34.8	13.7946	10.1739	12.2939	13.1129	9.70531	10.1246	11.8702	11.3167	13.3487	10.6169	11.5136	14.5003	13.2846	9.58025	9.96133	9.75122				34.8	-0.17187	0.3704	-0.3753	0.62018	0.24804	-0.1643	0.36788	1.30974	0.18278	-0.74295	-0.04801	-1.29447	0.95235	-1.32819	-0.03786	0.00646				34.8	3.99267	2.73642	2.93135	1.85746	3.15184	3.54691	4.86587	3.97406
	34.9	14.3722	10.3411	12.1812	13.9122	9.48423	10.3755	11.9665	11.0755	13.5684	9.97072	12.0278	14.4564	13.075	9.9609	10.8522	10.0634				34.9	-0.14787	0.9646	-0.41578	0.47758	-0.23246	0.2921	0.08372	1.04127	0.33372	-0.52293	0.08821	-0.37723	0.39841	-0.88171	-0.56159	-0.45001				34.9	3.42937	2.76328	3.38921	2.49882	2.92509	3.78563	5.05378	3.73674
	35	14.487	10.5491	12.0177	14.7766	9.26149	10.3507	11.6148	11.6533	12.8645	9.77549	12.4792	14.0922	13.0875	10.8392	11.1877	10.2978				35	-0.42947	1.27745	-0.28712	0.17215	-0.14252	0.52385	0.43067	0.36175	0.3672	-0.79866	0.10113	0.89848	0.64374	-0.69391	-1.30691	-0.84002				35	2.82857	3.27851	4.33986	2.94323	3.51522	4.0784	5.77363	3.73004
	35.1	14.4977	11.2349	11.6708	15.1241	9.5891	9.90044	10.9175	12.6385	12.0773	9.9225	12.7762	13.3447	13.2936	11.6011	10.9905	10.3734				35.1	-1.17419	1.15183	-0.21036	-0.03015	0.06365	0.3942	0.82754	-0.2885	0.30644	-1.00008	0.15822	1.81269	0.6984	-0.81867	-1.70594	-0.76028				35.1	2.49369	3.93241	5.16407	3.09908	4.3224	4.27733	5.74074	4.05932
	35.2	14.8419	12.2096	10.9964	14.6403	10.7479	9.38523	10.8618	13.5799	11.5177	9.76631	12.7299	12.3037	13.2109	12.1839	10.4406	10.3748				35.2	-1.90288	0.69539	-0.22265	0.07748	-0.10024	0.06943	0.92687	-0.5317	0.1796	-0.71683	0.23232	1.89246	-0.08014	-0.84099	-1.51768	-0.26458				35.2	2.57123	4.60292	5.42923	3.56654	4.33397	4.05444	4.31841	4.70851
	35.3	15.046	12.3669	9.75142	13.6364	12.105	9.17456	11.6815	14.0248	10.9703	9.50959	12.5011	11.448	12.6752	12.4239	10.0786	10.7593				35.3	-2.17502	0.11431	-0.18927	0.0287	-0.33824	-0.29742	0.65909	-0.33497	0.11525	-0.16585	0.33371	1.33481	-1.2077	-0.82106	-0.632	0.08891				35.3	2.99304	4.97705	5.35806	4.4613	3.88377	3.41464	2.55951	5.06284
	35.4	14.7288	11.3817	8.11995	12.7952	12.5381	9.5107	12.3679	13.6952	10.4234	9.68161	12.6559	11.4016	12.0991	12.1476	10.191	11.5084				35.4	-2.02458	-0.3533	-0.04568	-0.50058	-0.27333	-0.44716	0.27385	0.18645	0.27472	0.15724	0.40748	0.59064	-2.051	-0.94898	0.41855	0.00862				35.4	3.55745	4.50053	5.19435	5.06739	3.84551	3.01927	1.5246	4.68313
	35.5	14.4509	10.2757	6.90176	12.3606	11.7084	9.9707	12.5974	12.9116	10.0548	9.9208	13.2824	11.9791	11.8312	11.9173	10.4225	12.0123				35.5	-1.62355	-0.52721	0.07568	-0.78967	0.01349	-0.38716	0.19874	0.45249	0.45879	0.18917	0.39759	-0.14454	-2.25378	-1.00301	0.81268	-0.24387				35.5	4.0392	3.72306	5.0514	4.84522	4.03102	3.40517	0.99382	4.14096
	35.6	14.7571	10.1205	6.6882	12.0618	10.3961	10.0612	13.2049	12.3386	10.2843	9.57525	13.7841	12.2576	11.8139	12.1444	10.5785	11.9386				35.6	-0.92389	-0.594	0.07485	-0.48652	0.28563	-0.51553	0.50106	0.1827	0.37435	0.33588	0.27009	-0.65713	-1.67626	-0.72532	0.63685	-0.1713				35.6	4.03581	3.87665	4.9994	4.39416	4.18783	4.15066	0.7765	3.75362
	35.7	15.4523	10.9509	7.12214	11.8758	9.52636	10.1121	14.1399	12.1619	11.3078	9.03035	13.6795	11.9513	11.778	12.4528	10.5971	11.4276				35.7	-0.00363	-0.70911	-0.05266	-0.30003	0.36488	-0.84773	0.98006	0.05445	0.04191	0.52821	-0.06706	-0.64906	-0.71869	-0.36904	0.31952	0.3181				35.7	3.33825	5.15865	4.91541	4.44709	4.45055	4.58927	1.26472	3.08659
	35.8	16.0867	11.8009	7.76586	11.9228	9.31011	10.0066	14.3667	11.8946	12.7396	9.27235	13.2317	11.6119	11.6706	12.502	10.3868	10.8769				35.8	0.78801	-0.56438	-0.34023	-0.57245	0.28472	-1.08101	1.43086	0.37374	-0.20874	0.31234	-0.42073	-0.35332	0.00522	-0.46894	-0.0409	0.81317				35.8	2.60132	6.51513	4.58706	4.58716	4.47666	5.04305	2.32954	2.42476
	35.9	16.4116	11.9028	8.62261	11.8659	9.29059	9.1974	13.4325	11.2827	13.9467	10.2575	12.8479	11.5711	11.7679	12.6316	10.2445	10.6233				35.9	1.30348	0.01496	-0.55074	-0.77397	0.19793	-1.12649	1.46008	0.47792	-0.14028	-0.08293	-0.34725	-0.24051	0.25211	-0.85049	-0.23766	0.9134				35.9	2.31562	6.66929	4.05495	4.35253	3.85168	5.97464	3.42523	2.72897
	36	16.308	11.5519	9.63371	11.5183	9.11634	8.4653	12.123	10.7398	14.1717	10.7483	12.3746	11.8149	12.1099	12.8956	10.5566	10.5591				36	1.51141	0.70524	-0.50795	-0.58198	0.20705	-0.9175	0.74273	0.12678	0.0202	-0.17546	0.20173	-0.15752	0.13701	-0.82422	-0.28896	0.55214				36	2.15611	5.67167	3.81768	4.04239	3.08246	6.69781	3.97244	3.9522
	36.1	15.8822	11.5074	10.4852	11.1569	8.9885	8.98969	11.5092	10.8538	13.2619	10.092	11.9215	12.3584	12.1998	12.5703	11.2725	10.3398				36.1	1.27275	0.88425	-0.47169	-0.41695	0.35823	-0.4097	-0.31336	0.03965	-0.07434	-0.03226	0.84534	0.17345	-0.04207	-0.32334	-0.48652	0.08803				36.1	1.90024	4.48319	4.32171	3.87261	2.91742	6.63068	3.58179	5.10042
	36.2	15.5582	12.2141	10.7522	11.1254	9.31582	10.4477	11.5355	11.7072	12.2557	8.94922	11.9312	12.7569	11.9954	11.6309	12.0329	10.0299				36.2	0.56746	0.28882	-0.60083	-0.63438	0.67576	0.11785	-0.96699	0.66031	-0.35909	0.17011	1.4307	0.42436	-0.00948	0.17235	-0.58193	-0.11842				36.2	1.86439	3.74603	4.98515	3.5934	3.41223	6.17133	2.77692	5.32932
	36.3	15.6892	13.4043	10.4631	11.438	10.1502	11.7399	11.6135	12.5724	12.02	8.34345	12.2235	12.482	12.0806	11.0853	12.4068	9.96796				36.3	-0.40485	-0.2959	-0.74731	-1.03864	1.05103	0.21939	-1.1135	1.57718	-0.45499	0.37468	1.84408	0.4104	0.14697	0.25848	-0.42637	-0.17551				36.3	2.28246	3.8471	4.8297	2.89985	4.12336	5.697	2.44116	4.61939
	36.4	15.9011	14.3613	10.2781	11.7874	10.9216	12.2355	11.8598	12.8501	12.145	8.72939	12.2383	11.9041	12.5944	11.4358	12.0885	10.2284				36.4	-1.2503	-0.10338	-0.73943	-1.40107	1.09726	-0.21177	-1.24216	2.17844	-0.07028	0.45972	1.77268	0.35899	0.23714	-0.02716	-0.30502	-0.35847				36.4	3.02199	4.53481	3.98661	1.82341	4.69688	5.42876	2.77602	3.71103
	36.5	15.4382	14.742	10.652	11.9607	11.1254	11.8153	12.487	12.755	11.8819	9.60681	11.8494	11.625	13.2243	12.3123	11.2963	10.5246				36.5	-1.43676	0.32514	-0.48358	-1.56753	0.56824	-0.78231	-1.5721	2.05656	0.58649	0.18295	1.2552	0.24634	0.26462	-0.19544	-0.11264	-0.34349				36.5	3.61934	5.14802	3.51675	1.11048	4.90187	5.57918	3.32602	3.25158
	36.6	14.4862	14.4131	11.0694	11.9555	11.0638	10.8887	13.1172	12.588	10.9592	10.2392	11.4002	11.8181	13.7576	13.1144	10.7041	10.5992				36.6	-0.79032	0.21059	-0.00972	-1.32332	-0.17757	-1.05737	-1.67352	1.07474	0.85187	-0.39816	0.88195	0.04798	0.11064	-0.01105	0.14911	0.18398				36.6	3.69515	5.67353	3.89213	1.58004	4.62019	5.83855	3.56638	3.41053
	36.7	14.0978	13.3814	10.8302	11.7662	11.0005	10.1246	13.5018	12.3553	9.96851	10.7176	11.2603	12.2989	13.8819	13.5109	10.6383	10.3871				36.7	0.20186	-0.29242	0.39792	-0.78417	-0.67644	-1.0077	-1.07462	-0.3305	0.51717	-0.79006	0.86001	-0.23626	-0.20421	0.28643	-0.02889	0.61914				36.7	3.53716	6.12999	4.49986	2.67245	4.11846	5.77698	3.4759	3.87905
	36.8	14.7537	12.4433	10.1386	11.4672	10.5556	9.96512	13.7429	12.1448	10.007	11.2633	11.4815	12.5421	13.5081	13.6632	10.7552	9.96464				36.8	0.8787	-0.58725	0.55679	-0.36914	-0.89896	-0.7467	-0.22829	-1.21629	0.16494	-0.76172	0.71341	-0.7746	-0.22008	0.39527	-0.49493	0.42699				36.8	3.40136	6.08903	4.77904	3.45536	3.83488	5.67351	3.65815	3.89957
	36.9	15.7853	12.2372	9.48736	11.1583	9.78891	10.5763	13.7241	12.0037	11.2486	11.4746	11.7623	12.3058	13.157	13.6672	10.6383	9.72223				36.9	0.83506	-0.34897	0.72021	-0.30201	-0.8155	-0.16843	-0.068	-1.07836	0.14125	-0.6316	0.31754	-1.26259	0.25921	0.16262	-0.66596	-0.1308				36.9	3.24469	5.48555	4.80021	4.14228	3.80963	5.69701	4.36446	3.42282
	37	16.2991	12.3806	9.0835	10.886	9.40602	11.5749	13.3386	11.7357	12.7223	11.1238	11.891	11.8919	13.0017	13.3203	10.4136	10.1189				37	0.0585	0.15419	0.90834	-0.34068	-0.3045	0.47744	-0.60471	-0.25228	0.12004	-0.50785	-0.14407	-0.99948	0.78273	-0.1677	-0.48539	-0.52708				37	3.31958	4.57604	4.90184	4.9527	3.88497	5.4029	5.02312	3.42326
	37.1	16.1422	12.3046	9.21707	10.7875	9.61633	12.0246	12.9294	11.5032	13.3981	10.6005	11.9039	11.89	12.7459	12.8336	10.3678	10.8748				37.1	-0.95173	0.44401	0.90988	-0.09301	0.47902	0.62693	-0.98288	0.53585	-0.10519	-0.20258	-0.71297	-0.06208	0.98894	-0.14932	-0.00163	-0.42798				37.1	3.7705	3.61871	5.50644	5.27343	3.99297	4.88103	5.00843	3.98304
	37.2	15.861	12.0581	10.0279	10.9015	9.99783	11.5769	12.7369	11.7578	13.1811	10.2768	11.8665	12.4795	12.5759	12.7237	10.1371	11.2341				37.2	-1.60952	0.46396	1.02795	0.33078	1.12879	0.35454	-0.85343	0.97025	-0.24078	0.28644	-1.31266	0.823	0.85798	0.18902	0.72368	0.07674				37.2	4.22813	2.81366	6.47697	4.6815	4.0499	4.64135	4.57263	4.07709
	37.3	15.7216	11.7835	11.0775	11.0168	10.2475	10.9474	12.6585	12.2165	12.84	10.2886	11.9533	13.0238	12.9738	12.8457	9.39566	11.1539				37.3	-1.74814	0.37416	1.5888	0.53304	1.24041	-0.07066	-0.60731	1.29075	-0.14721	0.6298	-1.46384	1.38082	0.48207	0.41315	1.28667	0.73476				37.3	4.1982	2.13004	6.78091	3.71239	4.14827	4.34378	4.54185	3.53058
	37.4	15.3567	11.4989	11.8628	10.9979	10.1675	10.6252	12.5162	12.3497	12.7257	10.7315	12.2868	13.2311	13.6473	12.6584	8.59969	11.2143				37.4	-1.59145	-0.00893	2.16263	0.61434	0.85039	-0.67038	-0.45496	1.33532	-0.10845	0.47478	-0.89526	1.52421	0.16197	0.26295	1.31793	1.39469				37.4	3.65457	1.35814	5.9292	3.13622	4.3736	3.60798	4.93114	3.26208
	37.5	14.7473	11.5009	12.2701	10.9068	9.88575	10.3093	12.1543	12.2802	12.5381	11.377	12.4723	13.4711	13.7522	12.2413	8.36457	11.6219				37.5	-1.49882	-0.71311	2.11636	0.85142	0.40964	-1.38208	-0.22135	0.75456	-0.14018	0.06646	-0.07647	1.15235	0.23025	-0.1352	0.84915	1.76815				37.5	3.13602	1.0485	4.70355	3.06368	4.40464	3.13456	5.06047	3.45818
	37.6	14.3419	11.8292	12.1382	10.9005	9.93375	9.70467	11.6608	12.2029	12.2131	11.4159	12.145	13.7373	13.1913	12.0535	8.9019	11.7901				37.6	-1.51557	-1.31128	1.536	0.98223	0.1126	-1.84713	0.14176	0.04796	0.21766	-0.09591	0.36701	0.52675	0.56732	-0.44859	0.22106	1.54971				37.6	2.91893	2.07924	3.83888	3.20119	4.14804	3.47994	4.58667	3.17536
	37.7	14.3528	12.155	11.2822	11.0946	10.3435	8.97148	11.3147	12.0236	12.0036	10.5191	11.4858	13.5952	12.7374	11.9746	9.93911	10.9274				37.7	-1.16534	-1.67138	1.05718	0.87709	-0.231	-1.62944	0.55773	-0.20579	0.87067	0.0617	0.4386	-0.10407	0.70081	-0.51967	-0.26716	0.89987				37.7	3.03465	3.61288	3.39773	3.3555	3.99479	3.91629	3.68615	2.2182
	37.8	14.7114	12.3057	10.0747	11.6799	10.6945	8.53644	11.2072	11.7551	11.9969	9.49014	10.8	12.7301	12.8899	11.7462	10.9307	9.24544				37.8	-0.33293	-1.96958	1.05493	0.93192	-0.61357	-0.59445	0.98253	-0.32607	1.01473	0.3297	0.37434	-0.74685	0.56001	-0.44836	-0.45296	0.30969				37.8	3.42459	3.80575	3.44047	3.52476	4.11117	3.61604	2.91443	1.67076
	37.9	14.9497	12.275	9.10316	12.5227	10.921	8.67534	11.3902	11.6514	12.0842	9.02355	10.4198	11.5022	13.1893	11.6932	11.4555	8.06141				37.9	0.24562	-2.04831	1.25252	1.14081	-0.71861	0.79916	1.16648	-0.59604	0.46105	0.26752	0.25284	-1.32834	0.49714	-0.24097	-0.42896	0.25314				37.9	3.66856	2.45852	3.75997	3.68727	4.23558	3.1538	2.7389	2.02121
	38	14.4933	12.1323	8.4736	12.8447	11.2815	9.2086	11.8319	11.9362	11.9158	9.20475	10.708	10.731	12.8881	11.9321	11.5666	8.09663				38	0.01335	-1.57445	1.22518	0.98181	-0.57091	1.55377	1.01876	-0.52186	-0.04391	-0.4018	0.23179	-1.61914	0.56266	0.08759	-0.602	0.73933				38	3.61112	1.11342	3.61224	3.55557	3.9509	3.50467	3.16498	2.62087
	38.1	13.4945	11.8137	8.17567	12.5373	11.7697	9.70454	12.3394	12.1758	11.1912	9.8387	11.5083	10.7067	12.1017	12.0295	11.5238	8.7423				38.1	-0.55015	-0.7685	0.94221	0.25662	-0.45501	1.22149	0.99451	0.13933	-0.09071	-1.25265	0.49068	-1.39872	0.68699	0.27255	-1.20314	1.24829				38.1	3.38482	1.11195	3.16136	3.01307	3.28949	4.14498	4.0543	3.18593
	38.2	12.5917	11.1766	8.41565	12.1851	11.9283	9.90546	12.8056	11.778	10.2473	10.3356	12.2582	11.2706	11.4688	12.0284	11.2893	9.16932				38.2	-0.75513	-0.31523	0.57368	-0.42794	-0.39043	0.39686	1.15763	0.92144	-0.16633	-1.6912	0.87121	-0.75428	1.02206	0.20803	-1.84308	1.44629				38.2	2.91566	2.41253	3.46508	2.60303	2.94228	3.98007	4.76534	3.93271
	38.3	12.2047	10.1272	8.99249	11.8312	11.403	9.88002	13.2086	11.2558	9.54289	10.5414	12.6713	12.3526	11.2086	12.1946	11.0431	9.26658				38.3	-0.57788	-0.49315	0.26784	-0.34727	-0.14753	-0.30919	0.86702	1.38399	-0.63659	-1.69276	1.12316	-0.14317	1.50652	0.16851	-1.80314	1.4096				38.3	2.19429	3.72075	4.50029	2.91814	3.38497	3.38773	4.38074	4.77003
	38.4	12.489	8.96221	9.33309	11.2745	10.4961	9.5178	13.4337	11.5709	9.14066	11.1271	12.9813	13.6839	11.0901	12.236	11.1853	9.48792				38.4	-0.34749	-0.80841	0.02863	0.25258	0.38368	-0.66924	-0.07542	1.264	-1.07979	-1.71899	1.18719	0.19111	1.84218	0.33103	-0.95984	1.18082				38.4	1.60788	3.95719	5.3848	3.70231	4.29935	3.39401	3.34003	5.46665
	38.5	13.377	8.45937	9.27712	10.8423	9.90609	8.86646	13.1041	12.4168	9.21691	11.9365	13.2534	14.6434	10.8474	11.9328	11.216	9.97695				38.5	-0.3968	-0.71968	-0.13538	0.60287	0.79428	-0.48026	-0.83111	0.56261	-1.14715	-1.98449	0.94079	0.40647	1.73457	0.57357	-0.00593	0.73644				38.5	1.95995	3.59447	5.53703	4.1835	5.05413	4.11676	2.96607	5.64093
	38.6	14.5901	9.03289	9.14178	11.0172	10.0167	8.61218	12.2856	12.6275	9.68235	11.7964	13.2411	14.787	10.4238	11.508	10.3533	10.4496				38.6	-0.7805	-0.3457	0.10061	0.5198	0.43786	0.0992	-0.67032	-0.21169	-1.04804	-2.06031	0.36355	0.49753	1.10774	0.86029	0.37462	0.20204				38.6	3.35592	3.52241	4.95611	3.87229	5.2407	4.76071	3.35368	5.14909
	38.7	15.7983	10.2166	9.2606	11.7465	10.3929	8.78608	11.855	11.9354	10.0301	10.6888	13.173	14.2267	9.98604	11.0459	8.86047	10.7772				38.7	-1.04399	-0.04126	0.7686	0.26204	-0.56175	0.37517	0.08169	-0.53857	-0.81592	-1.56428	-0.23408	0.32247	0.31409	1.21036	0.19221	-0.17181				38.7	4.59133	3.54373	4.27555	3.05652	4.56771	4.81166	3.53379	4.61833
	38.8	16.6338	11.01	9.79452	12.3725	10.4467	8.64882	12.2392	11.262	10.3305	9.99772	13.3848	13.4248	9.7944	10.7663	7.89318	11.046				38.8	-0.64139	0.24004	1.27246	-0.05765	-1.37706	0.00224	0.63146	-0.45543	-0.17122	-0.81362	-0.55343	0.00681	-0.16476	1.40125	-0.11078	-0.32612				38.8	4.687	3.29259	4.19877	2.6731	3.38413	4.61907	3.11572	4.56161
	38.9	16.9759	10.7858	10.4614	12.1905	10.3644	8.14526	12.7187	11.3355	11.0255	10.5376	13.5746	12.8663	9.94048	11.0755	8.2791	11.1965				38.9	0.18241	0.51921	1.20677	-0.39537	-1.44648	-0.40669	0.49074	-0.28364	0.61702	-0.339	-0.36741	-0.30001	-0.21725	1.32543	-0.2774	-0.43832				38.9	4.00967	3.03906	4.5757	3.15096	2.59708	4.50043	2.84065	4.58277
	39	16.9779	10.0063	10.696	11.216	10.6274	7.71008	12.7135	11.5911	11.9968	11.7529	13.2489	12.4925	10.3402	11.8886	9.47355	10.9199				39	0.43219	0.64208	0.85745	-0.52005	-0.80518	-0.34526	-0.32768	-0.13769	0.98797	-0.21582	0.2133	-0.52085	-0.20608	1.17847	-0.29044	-0.68633				39	3.42312	2.93155	4.71707	3.92853	2.54882	4.52758	3.44105	4.25134
	39.1	16.6277	9.49467	10.526	10.2355	11.243	7.5478	12.3217	11.1894	12.668	12.7351	12.3991	12.0496	10.9074	12.7166	10.2387	10.1111				39.1	-0.4286	0.62267	0.83253	-0.43006	0.09479	-0.299	-1.14268	0.06549	1.1	0.00192	0.54078	-0.36301	-0.33329	1.04802	-0.23739	-0.86196				39.1	3.19609	2.71904	4.3902	4.59306	2.94583	4.69309	4.57974	4.0223
	39.2	16.0639	9.44268	10.5237	9.97297	11.9189	7.7347	11.7807	10.5661	12.6296	12.6509	11.4737	11.7397	11.2862	13.2496	10.1739	9.31105				39.2	-1.79061	0.6385	1.24346	-0.38643	0.74825	-0.52597	-1.10362	0.46177	1.18171	0.49223	0.37214	0.17766	-0.22934	0.89316	-0.20003	-0.47551				39.2	2.86206	2.40853	4.10719	5.33287	3.36582	4.82012	5.14576	4.40463
	39.3	15.747	9.64267	10.7012	10.5371	12.3307	8.18072	11.6182	10.2814	12.0494	11.4302	11.1032	11.7188	11.0803	13.3709	9.91941	9.24197				39.3	-2.49541	0.75184	1.47763	-0.28204	0.97653	-0.32689	-0.35861	0.94319	1.0013	0.85992	0.01899	0.575	0.04254	0.71504	-0.11648	0.40492				39.3	2.10299	2.47696	4.15201	5.97238	3.64965	4.88522	4.46943	4.89582
	39.4	15.7895	10.0387	10.5545	11.3164	12.2317	8.65422	12.2043	9.95129	11.5756	10.477	11.4004	11.8358	10.7063	12.9912	10.1972	9.91635				39.4	-2.20888	0.64497	0.93669	0.0167	0.91783	0.41721	0.23476	1.15302	0.66694	0.92481	-0.26659	0.48859	-0.37533	0.55618	0.0722	1.14722				39.4	1.29571	3.01003	4.24482	6.12097	3.91504	4.85229	3.26759	4.78693
	39.5	15.7669	10.7608	10.0535	11.4891	11.801	9.07943	12.9834	9.65416	11.4131	10.6579	12.0546	12.1091	11.0352	12.3583	11.0769	10.7596				39.5	-1.64573	0.08763	-0.20393	0.14294	0.79939	0.8782	0.34423	0.93645	0.58078	0.77453	-0.14732	0.11182	-1.57878	0.5565	0.37844	1.27492				39.5	1.1332	3.25325	4.36011	5.91416	4.19847	4.5218	2.78529	4.31709
	39.6	15.525	11.5555	9.47107	11.0203	11.3867	9.48934	13.3539	10.0129	11.2561	11.076	12.9071	12.8396	11.9348	11.8237	11.9739	11.1629				39.6	-1.23721	-0.52305	-1.2352	-0.10068	0.81	0.95426	0.13146	0.45398	0.73781	0.17972	0.52056	-0.3306	-2.5618	0.88095	0.86413	0.84732				39.6	1.82459	3.06032	4.29516	5.49019	4.53111	4.02973	3.33994	4.16291
	39.7	15.3862	11.7121	8.8513	10.6645	11.1446	9.74262	13.4566	10.9378	11.0338	10.8282	13.8749	13.9839	12.5794	11.3038	12.1964	10.8861				39.7	-0.85602	-0.66824	-1.72921	-0.34057	0.84101	1.15241	-0.17497	0.09331	0.92717	-0.80613	1.30691	-0.7545	-2.6087	1.39006	1.28738	0.43221				39.7	2.84438	3.15998	3.63856	4.43886	4.70029	3.63957	4.40261	4.57759
	39.8	15.5012	11.2289	8.40532	10.7961	11.1376	9.75355	13.5559	11.9212	10.9505	10.0187	14.7247	14.6785	12.7398	10.735	11.6375	10.5458				39.8	-0.57799	-0.31747	-1.91591	-0.14982	0.54899	1.40511	-0.38321	0.24197	1.13283	-1.34469	2.00341	-0.83048	-1.8118	1.6548	1.26786	0.31147				39.8	3.58817	3.46691	3.03323	2.91291	4.18439	3.11439	5.39995	5.35531
	39.9	15.5929	10.9045	8.50995	11.0208	11.1533	9.8633	13.4731	12.5677	11.0699	9.33904	14.8201	14.0824	12.6776	10.4918	10.8807	10.7304				39.9	-0.41803	0.06896	-2.01429	0.35825	-0.00532	1.31157	-0.46595	0.6793	1.21672	-0.91855	2.70561	-0.45281	-0.7588	1.40975	0.8956	0.06035				39.9	3.62182	3.47876	3.43503	2.02523	2.96105	2.47082	5.88265	5.92962
	40	15.5333	10.7602	9.12386	11.0961	10.9255	10.1074	13.0186	12.6684	11.186	9.46834	13.7541	12.8228	12.5683	11.0478	10.6027	11.0579				40	-0.07919	0.15929	-1.85364	0.60333	-0.39337	0.99116	-0.4169	0.78805	0.83603	-0.02569	2.91253	-0.11094	-0.04058	0.72691	0.34901	-0.57937				40	3.02337	3.40065	4.30324	2.36519	1.78105	2.55327	5.43602	5.77654
	40.1	15.5255	10.2826	9.78006	11.2128	10.8201	10.1328	12.6763	12.3935	10.9804	10.3847	12.3205	12.2716	12.51	12.2073	10.7504	11.1989				40.1	0.29295	0.28928	-1.35043	0.41458	-0.42669	0.94236	-0.39442	0.38326	0.10405	0.50574	2.01541	0.00612	0.18217	-0.15871	-0.42056	-1.15437				40.1	2.41429	3.56628	4.59951	3.30043	1.59989	3.50903	4.18306	5.16509
	40.2	15.5886	9.73267	10.1765	11.4022	11.4	9.9385	13.1266	12.2381	10.5039	11.234	11.7009	12.6219	12.3992	13.0677	10.8364	11.4128				40.2	0.23957	0.65283	-0.62698	0.11679	-0.27796	1.21467	-0.56687	-0.2366	-0.50277	0.32077	0.50056	0.28443	0.15573	-0.87891	-1.08071	-1.11036				40.2	2.1035	3.78872	4.36707	3.98322	2.73165	4.16323	2.93877	4.82784
	40.3	15.4706	9.62412	10.2607	11.664	12.3028	9.48186	14.0892	12.3179	10.2095	11.1952	12.023	13.1536	11.8789	13.0229	10.8148	11.4806				40.3	0.02155	0.67074	0.43047	-0.17158	-0.16291	1.21201	-0.68524	-0.6778	-0.80343	-0.25758	-0.52623	0.7023	0.20312	-1.33039	-1.10785	-0.40459				40.3	2.15109	3.73816	3.5641	4.26885	4.37797	3.99039	2.34544	4.88634
	40.4	15.1147	9.81598	10.1553	12.2933	12.5519	8.69927	14.6652	12.1833	10.2776	10.3086	12.4656	13.508	10.9868	12.5989	10.8452	10.984				40.4	0.08086	0.09937	1.67362	-0.44479	-0.16226	0.54852	-0.55959	-0.6527	-0.67157	-0.54791	-0.62213	0.84948	0.3246	-1.65703	-0.54921	0.52831				40.4	2.62832	3.50236	2.20876	4.49493	5.36734	3.62609	2.33116	4.67345
	40.5	14.7994	9.78698	10.1234	13.2341	11.9198	8.02546	14.6862	11.5122	10.435	9.6594	12.619	13.5982	10.4961	12.8816	11.0025	10.3569				40.5	0.07418	-0.57886	2.41305	-0.57141	-0.11892	-0.17666	-0.36756	-0.09261	-0.06465	-0.29135	-0.241	0.68426	0.30089	-1.63429	0.09784	1.12117				40.5	3.03234	3.48991	1.71807	4.68782	5.41753	3.42845	2.99754	3.84026
	40.6	14.4631	9.33019	10.3156	13.9443	11.0252	7.83044	14.5699	10.6893	10.5079	10.0884	12.9151	13.5063	10.936	13.8047	11.1961	10.5253				40.6	-0.09735	-1.02297	2.4534	-0.42684	0.06808	-0.39	-0.08616	0.79703	0.52055	0.17151	0.000250156	0.4804	0.18288	-1.03806	0.48917	1.12317				40.6	2.88299	3.71755	2.66853	4.20533	5.2092	3.44069	4.58459	3.00022
	40.7	14.0056	9.01439	10.7656	14.0543	10.5616	7.86634	14.2953	10.4452	10.5872	10.7981	13.4298	13.5591	11.946	14.2279	11.1451	11.5993				40.7	-0.07358	-1.30901	2.02825	-0.27165	0.03457	-0.52172	0.28014	1.75752	0.55496	0.44421	0.09409	0.39163	0.10899	-0.16093	0.58134	0.64231				40.7	2.46899	3.63434	3.63994	2.96425	5.24937	3.90025	6.13967	2.48792
	40.8	14.1248	9.46264	11.2006	13.6574	10.79	7.88765	13.5213	10.748	11.0022	10.8305	13.7286	13.5911	12.8424	13.7043	10.8097	12.4613				40.8	0.02172	-1.43026	1.29576	-0.47133	-0.49525	-0.83141	0.31702	2.35892	0.32647	0.45912	0.42952	0.31069	0.07256	0.55437	0.52348	-0.13784				40.8	2.20381	3.08558	3.801	2.17279	5.49356	4.49409	6.37406	2.01645
	40.9	15.0734	10.2535	11.0887	12.9343	11.3232	8.01182	12.5905	11.0918	11.8663	10.5499	13.6093	13.0987	13.0332	13	10.686	12.367				40.9	-0.10462	-1.08879	0.62106	-0.64048	-1.17889	-0.85386	0.00741	2.01145	0.47025	0.40283	1.02857	-0.04153	0.13023	1.021	0.66406	-1.00454				40.9	2.42058	2.58552	3.95169	2.59485	5.4852	4.51785	5.48612	1.85185
	41	15.8302	10.7083	10.514	12.066	11.8532	8.21784	12.2895	11.1341	12.6874	10.4808	13.0318	12.1714	12.4365	12.778	10.9433	11.9933				41	-0.29642	-0.49121	0.08716	-0.26643	-1.41513	-0.42608	-0.18907	0.81516	0.99917	0.29675	1.48124	-0.65664	0.2148	1.26521	0.93388	-1.6854				41	3.22747	2.54175	4.72411	3.46233	4.74187	4.03692	4.40967	2.52541
	41.1	15.77	10.9641	10.0604	11.5796	12.287	8.40861	12.4	10.9017	12.9677	10.5673	12.2772	11.3584	11.7605	12.4324	10.955	12.0137				41.1	-0.24281	-0.19136	-0.57143	0.24687	-0.87291	-0.00627	-0.07524	-0.36964	1.50119	0.01412	1.42399	-1.14363	0.29467	1.21577	0.73096	-1.7989				41.1	3.91469	3.00334	5.5337	4.06111	3.8894	3.4892	3.62733	3.63718
	41.2	15.3372	11.1263	9.91853	11.8458	12.3179	8.42227	12.208	10.8944	12.6316	10.6054	11.9385	11.1701	11.7107	11.4648	10.6932	11.9223				41.2	-0.05036	-0.05339	-1.09887	0.29119	0.04022	0.07085	0.19639	-0.98116	1.7246	-0.41486	0.97815	-1.01307	0.40972	1.08354	-0.04569	-1.32114				41.2	3.66529	3.59529	5.59416	4.55495	3.88833	3.02732	3.38887	4.31525
	41.3	14.9198	10.6991	9.96535	12.4024	12.0196	8.02151	11.8552	11.2359	12.0907	10.3888	12.1982	11.7694	12.1645	10.5856	10.7541	11.243				41.3	-0.06134	0.32839	-1.00936	-0.01999	0.44875	0.08879	0.50369	-1.12433	1.6181	-0.77896	0.49393	-0.06003	0.26864	1.13562	-0.73315	-0.70803				41.3	2.68171	3.75931	4.92992	5.01181	4.30301	2.67572	4.00485	4.62019
	41.4	14.7034	9.51607	9.94818	12.876	11.9321	7.43658	11.5241	11.2947	11.869	9.94243	12.7367	12.4716	12.686	10.1905	11.0131	10.5325				41.4	-0.22258	0.71272	-0.54179	-0.15816	0.24804	0.3716	0.79914	-0.99004	1.14318	-0.81477	0.11385	1.05126	-0.17369	1.15133	-0.77207	-0.11639				41.4	2.08353	3.50919	4.26717	5.21681	4.3201	2.47674	5.32529	5.06215
	41.5	14.8384	8.11243	9.70533	13.4869	12.2828	7.22717	11.1415	10.779	11.8215	9.54199	12.8769	12.3712	13.2866	10.133	10.904	10.2949				41.5	-0.4341	0.4202	-0.27235	0.06367	0.3485	0.72502	0.92926	-0.62928	0.47657	-0.63733	-0.20356	1.33584	-0.42437	0.99177	-0.43552	0.40969				41.5	2.58933	3.38086	3.88523	5.10295	3.85718	2.59952	6.43972	4.96399
	41.6	14.9854	7.26926	9.38917	14.02	12.7455	7.48592	11.0856	10.1887	11.3224	9.52005	12.18	11.9275	13.7003	10.5453	10.4398	10.3247				41.6	-0.7421	-0.58718	-0.20218	0.31144	0.98051	0.93545	0.88384	-0.31097	0.13469	-0.72416	-0.4564	0.82456	-0.59114	0.84398	-0.27623	0.50702				41.6	3.83333	3.63483	3.33461	4.90261	3.11016	3.03612	6.39864	3.52908
	41.7	14.8699	7.241	9.25788	13.8247	13.0549	8.02912	11.7666	10.0775	10.3712	10.0332	11.1067	11.9273	13.247	11.2789	10.1721	10.3514				41.7	-0.91904	-1.44395	0.04162	0.32664	1.22689	1.08124	0.73127	-0.10495	0.21111	-1.1792	-0.56925	0.40556	-1.23831	0.69033	-0.28189	0.10849				41.7	4.84127	4.03202	2.71842	4.81665	2.4134	3.60612	5.29092	2.0614
	41.8	14.6699	7.61271	9.4757	13.0258	13.0479	8.69412	12.7639	10.5941	9.71921	10.7877	10.6025	12.1091	12.2265	11.7566	10.1888	10.2505				41.8	-0.70891	-1.40262	0.42667	0.23164	0.76875	1.06454	0.35559	0.1535	0.12298	-1.28365	-0.37698	0.30771	-1.92365	0.50566	-0.19742	-0.33945				41.8	5.00111	4.13863	2.76778	4.5245	2.10607	4.036	3.90271	2.34028
	41.9	14.4938	8.28044	9.85931	12.4268	12.6371	9.04121	13.3551	11.5262	9.68606	11.6779	10.8793	12.3827	11.6256	11.7219	9.9386	9.98712				41.9	-0.13243	-0.64603	0.43704	0.21497	0.2712	0.63355	-0.07189	0.26449	-0.33304	-0.36197	0.22307	0.12161	-1.89143	0.42063	-0.01314	-0.39546				41.9	4.63566	3.67779	3.64328	3.8296	2.278	3.95389	2.89723	3.70509
	42	14.7009	9.3821	9.86435	12.383	12.271	9.0049	13.6355	12.3244	10.126	12.7578	11.1975	13.0645	11.4732	11.4215	9.41298	9.82793				42	0.52967	0.14548	-0.16662	0.34047	0.07344	0.0981	-0.09835	0.17084	-0.54963	1.12653	0.99837	0.03104	-1.25769	0.26795	0.13171	-0.0381				42	4.0483	2.9212	4.43026	3.02038	2.8401	3.59414	2.49672	4.32785
	42.1	15.547	10.5091	9.44741	12.6197	12.3624	8.85725	13.9478	12.3358	11.0372	13.2959	11.2054	13.724	11.2968	11.3163	9.3778	9.96772				42.1	1.00979	0.5751	-0.85516	0.57414	-0.05173	-0.05437	0.1608	0.14944	-0.08346	1.94367	1.43126	0.53977	-0.46723	-0.16783	0.09334	0.53019				42.1	3.16878	2.62128	4.51057	2.37147	3.32687	3.71551	2.7256	3.98687
	42.2	16.343	11.2422	9.30466	12.8323	12.6538	8.68882	14.068	11.5578	12.2653	12.6902	11.1566	13.629	11.3707	11.7904	10.1855	10.0226				42.2	1.35826	0.57599	-0.95879	0.73352	-0.23835	-0.12795	0.15415	0.23423	0.82522	1.40358	1.26378	1.32126	0.26366	-0.51159	-0.11626	1.0785				42.2	2.56873	2.99859	4.49111	2.48984	3.29934	4.46822	3.48115	3.66825
	42.3	16.4074	11.7193	9.46947	12.9461	12.7569	8.96379	13.8515	10.8417	13.2231	11.5174	10.9561	12.8461	12.0539	12.5905	11.2842	9.86441				42.3	1.61741	-0.00301	-0.61477	0.54117	-0.34067	-0.49326	-0.14651	0.35776	1.60878	-0.01771	0.86595	1.46637	0.85413	-0.24646	-0.17467	1.0009				42.3	2.74742	3.34269	4.74305	3.80426	3.08294	4.94474	4.36075	3.72888
	42.4	15.9625	11.8186	9.37151	12.967	12.5632	10.182	13.6592	10.6975	13.4402	10.645	10.5925	12.2191	12.9536	12.9545	11.9728	9.94374				42.4	1.68973	-1.11401	-0.28022	0.13951	-0.30954	-0.76854	-0.33039	0.42186	1.72967	-1.36115	0.57101	0.72115	1.16424	0.42266	0.08111	0.00561				42.4	3.29992	3.44554	4.94668	5.2813	3.04791	4.71468	4.99594	3.91996
	42.5	15.5003	11.0008	9.23502	13.0086	11.9761	11.6903	13.5601	10.6907	13.0012	10.417	10.7773	12.2607	13.3674	12.7379	12.1156	10.1062				42.5	1.49255	-1.92139	0.05594	0.02638	-0.24704	-0.61971	-0.22505	0.26856	1.1379	-1.82325	0.25168	-0.16236	1.15925	0.90817	0.34161	-1.22754				42.5	3.96577	3.71964	4.97687	5.73066	3.07401	4.39038	5.43089	4.08073
	42.6	15.155	9.55106	9.71538	13.2976	11.2917	12.431	13.2786	10.4685	12.3561	10.8014	12.0081	12.5199	13.0575	12.2408	12.0271	9.87776				42.6	1.0783	-1.76112	0.39501	0.36501	-0.16624	-0.40312	0.03139	0.03162	0.44406	-1.19983	-0.07914	-0.31842	0.82612	0.9956	0.4058	-2.067				42.6	4.70539	3.93029	5.05581	5.11364	3.16519	4.23125	5.68916	4.02544
	42.7	14.8978	8.74113	10.5379	13.6233	11.002	12.1855	12.8546	10.3479	11.7953	11.6736	13.7674	12.3716	12.5541	11.5031	11.8787	9.38205				42.7	0.51955	-1.21064	0.52552	0.86682	-0.05412	-0.55031	0.30036	-0.03891	0.07078	-0.16368	-0.20109	0.17339	0.1208	0.83116	0.58644	-2.45273				42.7	4.8732	3.64564	5.29315	4.15065	3.39236	4.06964	5.46218	3.88631
	42.8	14.6468	9.20156	10.8748	13.687	11.0194	11.4026	12.3748	10.6793	11.4682	12.4266	14.9297	11.8613	12.3892	10.7147	11.6635	8.90522				42.8	-0.26243	-0.82527	0.52331	1.04084	0.03265	-1.03608	0.47253	-0.02404	-0.27667	0.42257	-0.18993	0.58198	-0.627	0.62238	1.00392	-2.45443				42.8	4.29755	3.3515	5.19491	3.74646	3.89087	3.90212	4.84189	4.10387
	42.9	14.6287	10.1946	10.7316	13.7419	11.1532	10.7632	11.94	11.3225	11.5826	12.1244	14.7457	11.6179	12.264	10.4157	11.4108	8.51927				42.9	-0.80649	-0.34261	0.58811	0.48659	0.13026	-1.38391	0.50762	-0.1739	-0.86276	0.2818	-0.35777	0.61157	-0.9476	0.53093	1.20613	-2.161				42.9	3.81883	3.61909	4.43887	3.81536	4.98136	3.59734	4.30663	4.73529
	43	15.1236	10.8573	10.7705	13.705	11.4058	10.5541	11.8361	11.7809	12.0794	10.9988	13.4639	11.8574	11.8701	10.8249	11.1909	8.29695				43	-0.56738	0.32695	0.66774	-0.53517	0.32206	-1.15285	0.46231	-0.54093	-1.36662	-0.31556	-0.76876	0.51026	-0.8762	0.55555	0.83232	-1.63824				43	3.7687	3.9409	3.5914	3.52835	6.23956	3.19938	4.06278	5.18748
	43.1	15.463	11.1491	11.0152	12.9131	11.5897	10.3184	12.205	11.7268	12.3325	10.2348	11.968	12.165	11.5982	11.6036	11.1584	8.42894				43.1	0.05736	0.81224	0.53899	-1.21631	0.37368	-0.71288	0.32282	-0.83968	-1.29296	-0.89209	-1.01497	0.49476	-0.78676	0.51031	0.00353	-0.95207				43.1	3.90051	3.76056	3.16798	2.92662	6.51559	3.27963	3.92293	4.89948
	43.2	15.0113	11.0823	11.0519	11.5059	11.599	9.5905	12.9005	11.346	11.8253	10.2145	11.0173	12.26	11.6934	12.3739	11.211	8.98622				43.2	0.4095	0.79356	0.26777	-1.00658	0.07125	-0.68436	0.11558	-0.77399	-0.56149	-1.15726	-0.81623	0.45481	-0.64967	0.32424	-0.89747	-0.37801				43.2	4.11682	3.38388	3.10242	2.64847	5.72474	4.13158	3.71407	4.28472
	43.3	14.5153	10.3617	11.0749	10.5172	11.6037	8.51401	13.4879	11.129	11.064	10.5309	10.8905	12.1931	11.8941	12.9185	10.9195	9.84725				43.3	0.32938	0.26388	0.25249	-0.09584	-0.25946	-0.76772	0.087	-0.28573	0.35461	-1.08464	-0.52191	0.19437	-0.24667	0.20103	-1.42759	-0.11738				43.3	4.30196	3.18962	3.31888	2.87701	4.92225	5.23818	3.48064	4.11266
	43.4	14.7052	9.16864	11.3003	10.6422	11.6862	7.74933	13.544	11.1832	10.7296	11.0412	11.3232	12.2314	11.9917	12.8735	10.2396	10.6274				43.4	0.19711	-0.59751	0.42377	0.86196	-0.20811	-0.54315	0.34	0.34318	0.76981	-0.65423	-0.45286	0.04388	0.32007	0.20333	-1.44672	0.00307				43.4	4.397	3.24776	3.71815	3.27426	4.45412	5.74847	3.23174	4.32061
	43.5	15.0102	8.16397	11.5966	11.3044	11.7963	8.04832	12.9561	11.3284	10.8399	11.6622	11.7484	12.6781	12.0766	12.0504	9.69269	10.8983				43.5	0.38203	-1.42444	0.19032	1.4003	0.03968	-0.35595	0.51459	0.71339	0.48841	-0.1141	-0.31062	0.39067	0.64223	0.07445	-1.17308	0.20685				43.5	4.62177	3.56999	4.18845	3.68294	3.92618	5.4335	3.09418	4.25294
	43.6	14.7926	7.70327	12.1851	11.5021	11.9683	9.15097	12.1782	11.4584	11.1926	11.7757	11.8044	13.3365	12.554	11.1042	9.78133	10.8015				43.6	0.71681	-1.69802	-0.54912	1.49303	0.00474	-0.56399	0.3497	0.76486	0.23741	0.01223	-0.00747	0.83199	0.27491	-0.14376	-0.88045	0.3673				43.6	5.1899	3.89886	4.85755	4.11648	3.39747	5.04247	3.46902	3.89617
	43.7	14.3657	7.81267	13.0297	11.3321	12.2418	9.84895	11.986	11.4886	11.4507	10.9529	11.3665	13.6521	13.5908	10.9056	10.5333	10.7598				43.7	0.70302	-1.21219	-1.07813	1.3685	-0.11975	-0.79735	0.0067	0.54038	0.68588	-0.21806	-0.04385	0.88364	-0.5776	-0.23044	-0.6198	0.3268				43.7	5.70684	3.67021	5.60315	4.09589	3.05132	5.10817	4.41054	3.9893
	43.8	14.3436	8.59979	13.2336	11.3735	12.4376	9.66106	12.582	11.4506	11.4972	9.75691	10.6755	13.4338	14.4295	11.3485	11.58	10.8219				43.8	0.0343	-0.51358	-0.89652	1.20644	0.37797	-0.68224	-0.17892	0.14412	1.4776	-0.37585	-0.56756	0.5702	-0.95657	-0.2455	-0.18166	0.16537				43.8	5.6047	2.7799	5.61958	3.42546	2.6038	5.24431	5.31961	4.57428
	43.9	14.7941	9.57905	12.3166	11.5225	12.1592	9.0799	13.2275	11.4781	11.3144	8.98615	10.4154	12.991	14.226	11.5896	12.4151	10.7995				43.9	-0.7459	-0.62112	-0.4483	1.04	1.38601	-0.56235	-0.17736	-0.07601	2.00539	-0.38326	-0.94674	0.00875	-0.47156	-0.14846	0.59211	-0.00881				43.9	4.86917	1.96212	4.37854	2.85764	2.13625	5.18086	5.43829	4.87835
	44	15.2673	9.92449	11.0151	11.553	11.3907	8.60543	13.1151	11.8033	10.6029	9.11069	10.7684	12.7678	13.3079	11.4983	12.5112	10.3736				44	-0.90605	-1.7284	-0.20613	1.03511	1.88395	-0.51408	-0.35477	0.02176	2.10738	-0.44796	-0.60362	-0.67948	0.30647	0.14455	1.50085	-0.19461				44	3.88356	1.89773	2.87828	2.95651	2.14137	5.12356	4.69521	4.79111
	44.1	15.3092	9.74791	10.137	11.6225	10.7307	8.42236	12.3113	12.439	9.64748	10.0056	11.3137	12.8555	12.6391	11.6082	11.9135	9.68489				44.1	-0.56908	-2.76821	-0.10171	1.21342	1.3416	-0.01476	-0.59531	0.33227	1.82371	-0.66821	0.39508	-1.30391	0.95764	0.41513	1.95437	-0.36845				44.1	3.03337	2.68572	2.3995	3.30999	2.5471	5.05433	3.84214	5.08497
	44.2	14.7456	9.47023	9.76259	11.8981	10.6429	8.32086	11.4751	13.0101	9.24385	10.7989	11.8293	12.7886	12.6322	11.9589	11.4014	9.50405				44.2	-0.17819	-2.95517	-0.06398	1.30426	0.21318	0.79656	-0.56015	0.70358	1.26909	-0.70454	1.42878	-1.58096	1.27933	0.51346	1.53099	-0.4024				44.2	2.81421	3.97226	2.68595	3.28015	2.82724	4.63625	3.4648	6.01484
	44.3	13.9952	9.14697	9.78614	12.0479	10.8728	7.98169	11.4158	13.2399	9.78809	10.7958	12.2277	12.0549	12.9106	12.1821	11.3968	10.0076				44.3	0.07176	-2.45375	-0.15982	1.12356	-0.71245	0.99521	-0.46115	0.70139	0.64951	-0.32265	1.78344	-1.23496	0.88737	0.4737	0.68258	-0.32392				44.3	3.21628	5.03084	3.0067	3.00685	2.69807	3.60592	3.43369	6.62066
	44.4	13.4469	9.00862	10.1513	11.9475	10.8429	7.33652	12.3674	12.9984	11.2136	10.2108	12.2134	10.9594	12.8546	12.0965	11.6953	10.7088				44.4	-0.01934	-1.53748	-0.30513	0.73786	-1.00602	0.29662	-0.27189	-0.04828	0.35988	-0.02893	1.44019	-0.58661	-0.06039	0.31339	0.18929	-0.39016				44.4	3.42863	5.47159	3.3271	3.17615	2.39199	2.0978	3.43109	6.09094
	44.5	12.9939	9.28839	10.4503	11.9494	10.568	6.87639	13.2356	12.376	12.8734	9.45294	11.7072	10.4167	12.3602	11.9222	12.1388	11.2179				44.5	-0.42566	-0.36759	-0.33332	0.42337	-0.79629	-0.52576	0.27426	-1.11779	0.77834	-0.24408	1.13108	-0.23678	-0.85575	0.17637	0.02555	-0.65756				44.5	2.95242	5.42457	3.78304	3.99211	2.30474	1.06722	3.4626	5.02499
	44.6	12.783	9.88285	10.1538	12.2163	10.3903	7.23433	12.988	11.9064	13.555	8.72069	11.3137	10.6818	12.0772	11.8902	12.3579	10.847				44.6	-0.81592	0.66246	-0.27011	0.23842	-0.19693	-0.74385	0.79086	-1.5687	1.67403	-0.54618	1.36697	-0.0878	-1.13901	0.27185	-0.15488	-0.84535				44.6	2.40929	4.74356	4.31948	4.7072	2.56517	1.40688	3.79484	4.46256
	44.7	13.2031	10.4739	9.39566	12.666	10.3185	8.27463	12.1688	12.0447	12.7646	8.43838	11.5468	11.2061	12.3582	11.6667	12.2443	9.40162				44.7	-0.97185	1.21294	-0.52153	-0.07255	0.72231	-0.44327	0.89135	-1.0378	2.13736	-0.54782	1.6123	0.27809	-1.01863	0.51219	-0.15636	-0.6895				44.7	2.69356	3.2943	4.55452	4.89187	3.07336	2.47133	4.28927	4.63123
	44.8	14.1497	10.9183	9.06603	12.8755	10.2957	9.19805	11.7759	12.6602	11.6935	9.05334	12.1234	11.5359	12.7086	10.9811	12.4864	8.25133				44.8	-0.67762	1.26172	-1.21641	-0.48298	1.33907	-0.36036	0.73075	-0.08659	1.67475	-0.45474	1.07019	0.82858	-0.54649	0.56105	0.24391	-0.15329				44.8	3.42258	1.83422	4.10045	5.00276	3.7244	3.21928	4.65158	4.843
	44.9	15.1211	11.1098	9.34193	12.6559	10.3162	9.40294	12.1019	13.4033	11.5859	10.3068	12.6212	11.7676	12.7416	10.2351	13.2318	8.57813				44.9	0.08482	0.87116	-1.74341	-0.63727	1.12691	-0.77327	0.51047	0.46911	0.86383	-0.28034	0.16959	1.30279	0.15654	0.18545	0.64781	0.61293				44.9	3.59491	1.51093	3.25984	5.32625	4.43288	3.55755	4.95221	4.44689
	45	15.729	10.7906	9.4231	12.381	10.1195	9.1779	13.038	13.958	11.9504	11.3163	12.9289	12.2643	12.5468	9.78231	13.5672	9.6937				45	0.79627	0.21396	-1.54489	-0.34557	0.54505	-1.12291	0.47527	0.4095	0.60932	0.10962	-0.21741	1.5979	0.73021	-0.28849	0.69452	1.3623				45	3.15291	2.54266	2.62058	5.49001	5.25023	3.67982	5.29348	3.8998
	45.1	15.7949	10.127	9.34702	12.1889	9.50328	9.14964	14.1024	14.0004	11.6763	11.5783	12.8888	12.9197	12.3186	9.66538	12.8218	10.2371				45.1	0.89577	-0.24816	-0.79341	0.22468	0.20061	-1.02338	0.77662	0.07551	0.98613	0.40062	-0.20093	1.63839	0.98217	-0.23396	0.64064	1.62036				45.1	2.70346	4.11968	2.48786	5.20973	5.82735	3.7243	5.54924	3.98395
	45.2	15.4618	9.73547	9.61984	11.8836	8.92284	9.20601	14.5978	13.2952	10.796	11.4912	12.4131	13.2067	12.3557	9.9469	11.2159	10.0041				45.2	0.45619	-0.21922	-0.00789	0.68117	-0.04685	-0.57797	1.20222	-0.30181	1.12593	0.40815	-0.2301	1.34073	0.94555	0.2321	0.61912	1.08343				45.2	2.91328	5.45814	2.66692	5.06552	5.45976	3.89955	5.41068	4.4415
	45.3	15.1067	9.92668	10.0445	11.676	8.905	9.00539	14.399	12.2081	10.2695	11.7876	11.8028	12.9104	12.6072	10.4703	9.67602	9.5098				45.3	0.11656	0.18122	0.55383	0.79024	-0.43456	0.03717	1.44983	-0.49331	0.66672	0.45291	-0.23765	0.76721	0.70562	0.50187	0.45124	0.26424				45.3	3.68694	6.13677	2.62862	5.37382	4.49022	4.20148	4.79646	4.74194
	45.4	14.7641	10.5021	10.5127	12.0152	9.37799	8.84117	13.8728	11.6733	10.6953	12.5944	11.4094	12.5289	12.732	10.9851	9.18254	8.93236				45.4	0.12858	0.70736	0.7995	0.63702	-0.67898	0.51699	1.56693	-0.25529	0.34434	0.681	-0.00509	0.20494	0.445	0.62892	0.3786	-0.05927				45.4	4.07518	5.92576	2.45999	5.2949	3.83721	4.51242	3.9734	4.9144
	45.5	14.3161	10.9223	10.8319	12.6657	9.95864	9.06487	13.1613	12.0048	11.6712	13.0631	11.2323	12.541	12.749	11.492	9.67619	8.63743				45.5	-0.03315	0.97288	0.79203	0.47613	-0.59964	0.56971	1.70056	0.21542	0.71331	0.83652	0.29512	-0.16357	0.36212	0.99844	0.81917	0.14521				45.5	3.88911	4.9446	2.6894	4.67718	3.56053	4.90735	3.23379	5.15408
	45.6	14.0272	10.6402	10.449	12.8903	10.2472	9.35901	12.3864	12.5001	12.2673	12.603	11.121	12.7114	12.7356	12.0516	10.4834	9.14807				45.6	-0.62263	0.72304	0.73932	0.44254	-0.46223	0.3833	1.61221	0.74277	1.21256	0.78402	0.1781	-0.53781	0.3498	1.36941	1.57008	0.35085				45.6	3.73859	3.88702	3.18476	4.36489	3.33426	5.2998	2.80055	5.54166
	45.7	14.0123	9.78861	9.44322	12.4147	10.1131	9.33581	11.9331	12.7049	12.0771	11.8158	10.9894	12.6712	12.6644	12.4344	11.2753	10.0652				45.7	-1.05226	0.20032	0.57095	0.41542	-0.50928	0.1112	1.15802	1.10656	1.16664	0.57905	-0.37246	-1.02959	0.0641	1.20796	2.01107	0.39862				45.7	3.64084	3.45414	3.5824	4.2309	3.32269	5.31555	2.92467	5.80903
	45.8	13.9504	9.23863	8.50802	11.8643	9.76018	9.34067	12.0128	12.8792	11.4308	11.4802	10.7561	12.2877	12.7532	12.167	12.0425	10.5304				45.8	-0.75797	-0.1451	0.18499	0.27171	-0.84878	-0.23532	0.44108	0.82577	0.72902	0.32166	-0.71275	-1.24658	-0.39106	0.54709	1.80144	0.43096				45.8	3.32267	3.4056	3.77539	3.97204	3.86765	4.83644	3.52947	5.44929
	45.9	13.7551	9.65213	7.95112	12.0815	9.53893	9.88203	12.3665	13.2914	10.6293	11.5936	10.3677	11.5294	13.0733	11.2195	12.8194	10.3682				45.9	0.01172	-0.24728	-0.14699	-0.00885	-1.31016	-0.425	-0.19008	0.06356	0.32323	0.10096	-0.42473	-0.72543	-0.59451	-0.17348	1.17418	0.30156				45.9	3.06442	3.23458	3.6244	4.00157	5.10209	4.3019	4.00729	4.69958
	46	13.9051	10.4474	7.78509	12.8644	9.64389	10.4384	12.6698	13.8388	10.1251	11.5506	10.0743	10.81	13.3032	10.3003	13.2559	10.1926				46	0.68982	-0.21448	-0.27749	-0.26415	-1.50517	-0.7153	-0.38263	-0.49313	0.14671	0.00303	0.15375	0.28853	-0.59352	-0.56125	0.50117	-0.03021				46	3.19567	3.14658	3.30221	4.06794	6.44421	4.04743	3.89842	4.42658
	46.1	14.5313	10.5606	8.11028	13.1002	9.78477	10.1202	12.8036	14.1666	10.439	11.0134	10.2214	10.6737	13.2958	10.1989	12.9196	10.3675				46.1	1.11371	0.01315	-0.30522	-0.13159	-1.32768	-1.54145	-0.32784	-0.62755	0.19928	0.20567	0.33064	0.98743	-0.56665	-0.40963	-0.16857	-0.31045				46.1	3.67897	3.47883	3.30094	3.86586	6.89542	3.72032	3.57307	4.64289
	46.2	15.0521	10.0352	8.59391	12.5046	9.89942	9.1579	12.7738	14.0542	11.3729	10.4343	10.8118	11.0546	13.313	10.8643	12.1483	10.6264				46.2	1.40182	0.23734	-0.2729	0.44264	-1.04728	-2.26743	-0.41821	-0.48443	0.43962	0.69358	-0.14808	0.88724	-0.3415	0.01733	-0.79986	-0.45611				46.2	4.37577	3.81397	3.49532	3.8154	6.48208	3.1327	3.61209	4.81093
	46.3	15.111	9.58954	8.96103	11.9191	10.3815	8.43116	12.7136	13.6889	12.226	10.2549	11.593	11.4921	13.5692	11.5389	11.6936	10.7944				46.3	1.34909	0.13373	-0.14559	1.0666	-0.75899	-2.11919	-0.55228	-0.13563	0.81332	1.11285	-1.04527	0.34412	0.12631	-0.01276	-1.09732	-0.47346				46.3	5.14124	3.60402	3.41576	4.04497	5.81267	2.92687	3.98633	4.93798
	46.4	15.0965	9.5912	9.47996	11.8559	11.1422	8.4635	12.6673	13.324	12.6068	10.3005	12.3741	11.7723	13.9195	11.8819	11.6808	10.929				46.4	0.71811	-0.15471	0.13672	1.44774	-0.09472	-1.5284	-0.35098	0.06773	1.08962	1.12264	-1.86544	0.13639	0.52851	-0.62225	-0.92681	-0.36769				46.4	5.68079	3.07851	3.11765	4.19257	5.03781	3.51285	4.44509	5.12317
	46.5	15.5701	9.95392	10.0079	11.9165	11.5826	8.98288	12.4813	12.883	12.4764	10.2347	12.9795	12.0655	14.1311	12.096	11.6761	11.1146				46.5	-0.10124	-0.33879	0.44609	1.60398	0.97459	-1.19465	0.15516	-0.35213	1.0415	0.8226	-2.01819	0.44588	0.86514	-0.87956	-0.51391	-0.24849				46.5	5.96548	2.70701	2.99392	4.3095	4.2949	4.33264	4.84751	5.10928
	46.6	16.3712	10.3121	10.1103	11.6451	11.5108	9.28548	11.9886	12.2218	11.9569	10.0428	13.2142	12.4259	14.0023	12.1432	11.2997	11.4317				46.6	-0.79357	-0.3982	0.64688	1.53656	1.77242	-1.24212	0.60241	-1.10868	0.77377	0.7102	-1.33223	0.77221	1.2687	-0.15013	-0.19908	-0.22287				46.6	5.99993	2.75982	3.20625	4.5987	3.93506	4.67163	4.77301	4.57518
	46.7	16.8673	10.4327	9.79552	11.3376	11.4015	9.30417	11.2943	11.5137	11.4926	9.98472	13.2209	12.4963	13.2533	11.7402	10.5007	11.612				46.7	-1.41541	-0.45898	0.75134	1.26826	1.8652	-1.61004	0.72069	-1.55035	0.72194	0.98663	-0.38025	0.88225	1.27769	0.99025	-0.00231	-0.17922				46.7	5.48684	3.33774	3.70386	4.66773	4.09181	4.50733	3.89246	3.54042
	46.8	16.8239	10.4259	9.47885	11.3124	11.4928	9.38397	10.7984	11.2776	11.5193	10.396	13.2939	12.2109	12.3039	10.89	9.64138	11.2728				46.8	-1.65651	-0.76758	0.76931	0.93645	1.33909	-1.9023	0.47522	-1.55318	0.96223	1.20416	0.19884	1.0008	0.68661	1.57364	0.38428	0.10639				46.8	4.37136	4.11262	4.28976	4.22329	4.35958	4.32757	2.69039	2.57788
	46.9	16.2558	10.5669	9.46033	11.126	11.5369	9.56648	10.849	11.8192	11.864	11.2848	13.2943	12.0547	12.0822	10.1759	9.45153	10.6825				46.9	-1.2667	-1.29856	0.72496	0.58357	0.5812	-1.60652	0.0721	-1.31224	1.04784	1.11386	0.3161	1.07284	0.16436	1.39346	0.76099	0.4673				46.9	3.15999	4.40869	4.66547	3.47081	4.42064	4.19277	2.07671	2.35503
	47	15.2144	11.1133	9.71104	10.6396	11.4868	9.84347	11.4652	12.6248	12.0857	12.0797	13.028	12.3961	12.2685	10.2358	10.1988	10.4801				47	-0.76174	-1.4921	0.5301	0.18861	0.10786	-0.89346	-0.06773	-0.90069	0.68935	1.01709	0.20528	0.59702	0.28628	1.02194	0.5305	0.54886				47	2.6685	3.7284	4.55158	2.85928	4.54478	3.8569	2.39754	3.03732
	47.1	14.1732	11.9497	10.0592	10.4265	11.433	10.1923	12.2536	13.1308	12.016	12.1189	12.6668	13.0744	11.9907	10.9614	11.1422	10.6394				47.1	-0.62698	-0.8999	0.09141	-0.04225	0.05581	-0.36869	0.44247	-0.36183	-0.06128	0.99342	0.17671	-0.32557	0.87663	0.81569	-0.17553	0.51901				47.1	2.96061	2.56755	3.98549	3.09387	4.81817	3.51164	3.2163	3.97148
	47.2	13.5452	12.4962	10.0978	10.6232	11.2993	10.2281	12.8092	13.4947	11.6821	11.5014	12.3641	13.4391	11.5635	11.7519	11.5434	10.5477				47.2	-0.77863	0.04751	-0.33443	0.08377	0.1169	-0.28914	1.30506	0.06884	-0.79539	0.90935	0.35512	-0.81071	1.28869	0.58827	-0.53793	0.59068				47.2	3.16241	2.02917	3.27596	4.10583	4.81328	3.44478	4.16104	4.174
	47.3	13.5001	12.5218	9.562	10.894	11.0457	9.88779	13.322	13.8608	11.261	11.0026	11.8488	13.0597	11.4202	12.2645	11.529	10.0394				47.3	-0.92699	0.62161	-0.43444	0.32398	0.14863	-0.43937	1.67346	0.24137	-1.00393	0.82317	0.50076	-0.67495	1.08287	0.33173	-0.13996	0.52596				47.3	3.02793	2.39315	2.91978	4.94241	4.57887	3.62495	5.02767	3.35949
	47.4	14.0625	12.0734	8.81807	11.1042	10.8787	9.77719	13.8925	13.8634	10.9683	11.1988	11.0148	12.4564	11.2563	12.3683	11.4536	9.69044				47.4	-0.79478	0.70007	-0.31198	0.36448	0.25654	-0.71304	1.12633	0.26291	-0.89716	0.68356	0.43748	-0.55866	0.56441	0.2511	0.62608	0.28052				47.4	3.19719	3.21179	3.24415	5.21045	4.72324	3.91115	5.5429	2.48986
	47.5	14.6733	11.0717	8.60575	11.3158	10.9021	10.2005	13.8173	13.1732	11.0204	11.8339	10.4707	12.2701	11.1508	11.8335	11.2236	9.96537				47.5	-0.37794	0.52543	-0.23402	0.25224	0.31768	-1.1503	0.29667	0.31473	-1.00154	0.4891	0.40578	-0.64222	0.25213	0.14213	1.01335	0.05173				47.5	3.81615	4.27128	3.83109	5.28535	5.30928	4.00096	5.73392	2.81957
	47.6	14.8769	10.0341	9.38247	11.494	10.9201	10.7583	12.9125	12.0468	11.629	12.2376	10.6804	12.3505	11.5746	10.6896	10.899	10.5415				47.6	-0.08335	0.23056	-0.31425	0.20768	-0.00786	-1.50468	0.28752	0.60299	-1.1743	0.38116	0.50041	-0.72941	0.17546	-0.31351	0.68725	-0.16931				47.6	4.50762	5.08218	4.0672	5.61719	5.50292	3.69056	5.57289	4.22676
	47.7	15.0409	9.82979	10.53	11.7244	11.0403	10.7954	12.1549	11.1496	12.4169	12.2308	11.5396	12.3908	12.259	9.51905	11.0662	10.7073				47.7	-0.09431	-0.08518	-0.75039	0.34146	-0.70585	-1.59279	1.34478	0.95477	-0.94502	0.31286	0.34652	-0.73013	0.25235	-0.74929	0.0024	-0.54366				47.7	4.57191	4.95001	3.97258	6.0157	4.90106	3.72403	4.78318	5.55376
	47.8	15.2766	10.3126	10.8199	12.2792	11.5744	10.3173	12.09	10.8904	12.4265	12.0275	12.3353	12.4531	12.5484	9.11336	11.9498	10.258				47.8	-0.27141	-0.25628	-1.50145	0.61118	-1.44129	-1.46203	2.40006	0.99409	-0.3053	0.28651	-0.09315	-0.70268	0.46444	-0.68256	-0.51929	-1.04875				47.8	3.58264	4.20626	3.84476	5.98657	4.10337	4.79354	3.76083	6.14056
	47.9	15.2605	10.6721	10.184	13.0269	12.3283	10.1061	12.3772	11.2934	11.6923	11.6907	12.2975	12.5213	12.3974	9.53687	13.0347	9.64393				47.9	-0.49865	-0.00361	-1.83457	0.61395	-1.91613	-0.98415	2.31916	0.88637	0.20835	0.47181	-0.41036	-0.82986	0.37814	-0.29069	-0.63753	-1.39827				47.9	2.69658	3.76475	3.57919	5.71803	3.66251	5.88318	3.21632	6.06741
	48	14.9932	10.7555	9.63208	13.3291	12.6672	10.2858	12.797	12.1785	11.5648	11.1124	11.7053	12.4822	12.0804	10.2543	13.4942	9.25546				48	-0.57699	0.7207	-1.32086	-0.00374	-1.71634	-0.33163	1.39924	0.88488	0.1106	0.54468	-0.38969	-1.05947	-0.24763	0.20101	-0.6163	-1.21028				48	2.95966	3.95734	3.12992	5.83183	3.51753	5.59018	3.04565	5.64499
	48.1	14.5772	11.0611	9.59996	13.0543	12.0621	10.1753	12.9421	13.1237	12.5098	10.5042	11.3731	12.51	11.718	11.1479	12.9212	9.22335				48.1	-0.42887	1.30656	-0.51556	-0.69338	-0.93552	-0.13418	0.75818	0.66778	-0.44508	0.07395	-0.05072	-0.97496	-0.62963	0.67243	-0.73805	-0.37604				48.1	3.36314	4.26434	3.09132	6.21173	3.42804	4.38258	2.75858	5.38563
	48.2	13.9752	11.6105	9.62976	12.836	10.9803	9.52929	12.455	13.6978	13.3634	10.3484	11.3767	12.8577	11.3805	12.0872	11.7991	9.66205				48.2	-0.21556	1.19476	-0.02174	-0.80212	-0.32576	-0.33534	0.80321	-0.06222	-0.96873	-0.46188	0.34937	-0.28287	-0.06342	0.79277	-0.90903	0.48048				48.2	2.95321	4.0268	3.67864	6.02674	3.37689	3.43122	2.42588	5.81134
	48.3	13.2289	11.8357	9.36595	12.9592	10.5728	8.89857	12.0146	13.6766	13.1829	10.876	11.2407	13.3475	11.2304	12.5737	10.9083	10.5018				48.3	0.02022	0.73183	0.06958	-0.59004	-0.03937	-0.39995	1.02335	-0.86402	-1.11415	-0.34128	0.35793	0.58724	0.81579	0.38733	-1.05998	0.5168				48.3	2.16793	3.47323	4.04999	4.90066	3.59529	2.92794	2.497	6.75011
	48.4	12.6447	11.5597	9.10874	13.1492	10.9774	8.9658	12.2403	12.9978	12.1627	11.7078	10.8532	13.56	11.4276	12.6756	10.47	11.2566				48.4	0.30936	0.40245	-0.05219	-0.41828	0.49458	-0.34087	0.95678	-1.23817	-0.67371	0.15006	-0.09015	0.91128	0.99844	-0.3184	-1.00788	0.03517				48.4	1.66461	3.27415	3.63883	3.56271	3.80416	2.96148	2.89938	7.18004
	48.5	12.6739	11.2871	9.28049	13.1757	11.2515	9.6452	12.6906	12.0232	11.1716	12.0414	10.7495	13.5411	12.0518	12.7575	10.2043	11.4266				48.5	0.3625	0.17159	-0.09319	-0.27663	1.33872	-0.31689	0.72584	-1.36063	0.1227	0.24953	-0.4559	0.80394	0.54058	-0.80816	-0.45626	0.05066				48.5	1.89386	3.25033	3.02632	3.00566	3.34994	3.72303	3.248	6.3573
	48.6	13.3329	11.2379	9.8057	12.8011	11.2738	10.355	12.9269	11.3144	10.8717	11.5017	11.5007	13.7075	12.9852	12.6	9.82591	11.0443				48.6	-0.00554	-0.16066	0.08638	-0.15985	1.89215	-0.38061	0.58106	-1.509	0.66747	-0.08733	-0.24561	0.87575	0.18926	-0.63362	0.32357	0.59653				48.6	2.55492	2.99317	3.12024	3.09783	2.62066	4.75419	3.62246	4.85465
	48.7	13.9835	11.1609	10.1588	12.0224	11.8417	10.9676	13.1379	10.8827	11.1634	10.7032	12.7956	14.1264	13.8245	11.9829	9.36188	10.4369				48.7	-0.53819	-0.49977	0.25158	-0.12813	1.7942	-0.58481	0.6947	-1.61205	0.71438	-0.34523	0.2862	1.24184	0.17283	-0.02102	0.84108	1.01653				48.7	2.80253	3.0206	3.84409	3.20207	2.71066	5.37222	4.15844	3.93759
	48.8	14.0641	11.0825	9.78782	11.2955	12.6914	11.7425	13.5038	10.543	11.6845	10.5197	13.5825	14.3714	14.2291	11.0787	9.05713	9.84417				48.8	-0.93151	-0.39896	0.11855	-0.24747	1.13413	-0.7711	1.0858	-1.62537	0.50265	-0.36409	0.46966	1.58514	0.05574	0.34609	1.0715	1.07449				48.8	2.88448	3.70181	4.10673	3.30314	3.79389	5.41821	4.46481	4.16007
	48.9	13.7773	11.231	9.13262	11.2444	12.8296	12.3701	13.7721	10.3511	12.1741	11.1306	13.2396	13.9948	14.2808	10.0614	8.94442	9.60644				48.9	-0.90259	0.08587	-0.13477	-0.45614	0.30712	-0.84674	1.20043	-1.59649	0.30541	-0.31775	0.16594	1.53908	-0.23704	0.32053	0.92686	0.82558				48.9	3.62921	4.26893	3.51196	3.21195	5.14101	5.14455	4.17849	4.76208
	49	13.7968	11.5121	9.31512	12.098	11.981	12.0648	13.5586	10.443	12.3114	12.0731	12.3081	13.0527	13.9632	9.2014	8.92227	9.79818				49	-0.24302	0.33334	-0.38444	-0.48246	-0.33884	-0.97663	0.48431	-1.39066	0.13854	-0.24107	-0.14976	0.95011	-0.41381	0.38625	0.333	0.39553				49	4.86614	4.05161	2.97904	2.48632	6.21508	4.72683	3.81037	4.74204
	49.1	14.3824	11.6217	10.441	13.1142	10.6087	10.9343	12.9156	11.018	11.8871	12.7664	11.7304	12.3078	13.1045	8.74856	9.10202	10.1059				49.1	0.74988	0.21139	-0.71644	-0.09943	-0.71979	-1.21725	-0.52456	-0.86076	-0.12796	-0.05736	-0.08576	0.07187	-0.52195	0.73643	-0.09877	-0.00302				49.1	5.51502	3.5288	2.96941	1.51687	6.80719	4.24578	3.97912	4.34191
	49.2	15.2211	11.3818	11.4532	13.4421	9.62413	9.99503	12.1893	12.0952	11.3406	13.0942	11.6576	12.4262	12.3705	8.74186	9.59991	10.4883				49.2	1.40741	-0.16877	-0.799	0.4123	-0.72587	-1.33335	-0.94126	-0.04499	-0.48402	0.32938	0.22337	-0.54124	-0.5526	0.92824	-0.05519	-0.21658				49.2	5.05794	3.65269	2.97844	1.1049	6.83472	3.74891	4.25486	4.33968
	49.3	15.8856	11.147	11.6778	13.1941	9.67198	9.75963	11.375	13.1905	11.4467	13.2983	11.5333	12.9749	12.6852	9.33362	10.116	11.2383				49.3	1.37276	-0.8859	-0.37429	0.66262	-0.42992	-1.26195	-0.84241	0.71516	-0.68373	0.80263	0.52897	-0.63941	-0.32309	0.70078	0.13017	-0.31178				49.3	4.33856	4.46743	2.91602	1.46928	6.37085	3.25428	4.13759	4.53872
	49.4	16.1268	11.5204	11.339	12.7553	10.4579	9.99198	10.3897	13.5789	12.0339	13.178	11.1429	13.0533	13.693	10.4873	10.5859	12.1045				49.4	0.80744	-1.61395	0.10509	0.77855	-0.24219	-1.23136	-0.52605	0.97373	-0.5772	1.04457	0.79627	-0.73796	0.00683	0.18042	0.29652	-0.25162				49.4	4.18863	4.89907	3.10363	2.24227	5.55705	2.84205	4.08061	4.32251
	49.5	15.9101	12.3337	10.5849	12.3226	11.2342	10.4574	9.74413	12.9799	12.1287	12.3932	10.8439	12.4308	14.2109	11.5635	11.4925	12.1056				49.5	0.10449	-1.67631	0.10856	0.92363	-0.39295	-1.23549	0.15709	0.68545	-0.51377	0.95772	0.90006	-1.22014	0.39583	-0.4587	0.40162	0.21681				49.5	4.5121	4.51311	3.5518	2.91796	4.55324	2.77469	4.30994	3.62994
	49.6	15.3154	12.9027	9.3184	12.1369	11.2918	10.916	9.7961	11.9334	11.4311	11.3373	10.8287	11.4447	13.9396	12.08	12.5341	11.2891				49.6	-0.43696	-1.11635	-0.31655	0.85147	-0.6191	-0.95084	1.06137	0.17776	-0.55561	0.61055	0.58997	-1.55141	1.25988	-0.81804	0.3851	1.01238				49.6	5.03596	4.02818	3.88772	3.35561	3.47136	3.39357	4.42871	2.91638
	49.7	14.773	12.9825	8.06646	12.1639	10.7186	10.8918	10.1479	11.3608	10.5878	10.6765	11.1186	10.4825	13.4047	12.2261	12.7742	10.8549				49.7	-0.68927	-0.57235	-0.693	0.5077	-0.47472	-0.38921	1.67921	-0.09039	-0.36812	0.15868	0.00289	-1.2391	2.35651	-0.50738	0.38334	1.46213				49.7	5.44853	3.60408	3.97481	3.63814	2.52953	4.47907	4.53253	2.85468
	49.8	14.8548	12.3808	7.59905	12.4051	10.3707	10.2271	10.4466	11.761	10.4206	10.5077	11.7468	9.90308	12.8134	12.2045	12.2957	11.1649				49.8	-0.42432	-0.21588	-0.60292	0.33362	-0.00114	0.07684	1.67274	0.1013	-0.12626	-0.17271	-0.4609	-0.59237	2.70803	0.00708	0.49602	1.04674				49.8	5.02517	3.09635	3.93654	3.7765	2.11388	5.24985	4.98817	3.36828
	49.9	15.3978	11.0489	7.83961	12.6935	10.2894	9.2974	10.7861	12.7597	10.9502	10.3753	12.4662	10.0843	11.9543	11.8811	11.9157	11.5579				49.9	0.34627	0.10265	-0.04295	0.37356	0.17694	0.18257	0.99314	0.44133	-0.10838	-0.37365	-0.6337	-0.02825	1.88471	-0.12022	0.53833	0.13101				49.9	3.5577	2.84382	3.62801	3.75555	2.3962	5.15897	5.35228	3.58183
	50	15.8882	9.83896	8.17289	12.3493	10.0201	8.63865	11.285	13.5212	11.4755	10.1404	12.8347	10.8675	11.045	11.3482	11.8117	11.5558				50	0.89398	0.36493	0.6507	0.34201	-0.0973	-0.01292	0.00823	0.53505	-0.20915	-0.67057	-0.53734	0.31811	0.42132	-0.79688	0.43799	-0.45918				50	1.97856	2.8064	3.1807	3.59485	3.13957	4.50088	4.97079	3.43001
	50.1	16.3193	9.5443	8.33904	11.4309	9.57521	8.67275	11.741	13.7673	11.7812	10.2221	12.6583	11.5791	10.8838	11.0951	11.562	11.0895				50.1	0.59489	0.60834	1.09846	0.33439	-0.14367	-0.22841	-0.45178	0.49829	-0.33189	-1.07376	-0.39377	0.39977	-0.77798	-1.23495	0.4156	-0.31217				50.1	1.1117	2.59674	3.06291	3.38296	4.01894	3.91244	4.30328	3.66909
	50.2	16.5806	9.7352	8.45036	10.8292	8.96994	9.41917	11.7052	13.5951	12.2319	10.7791	12.2596	12.0019	11.5162	11.3514	11.084	10.3415				50.2	-0.17204	0.84031	1.04902	0.49086	0.38999	-0.43462	-0.1425	0.85603	-0.50589	-1.1964	-0.46402	0.40394	-1.22005	-1.14259	0.6537	0.25148				50.2	0.73309	2.42465	3.18818	3.26958	4.76844	3.68556	4.25498	4.19598
	50.3	16.4596	9.80536	8.56526	10.8276	8.42282	10.2776	11.1507	12.9195	12.8687	11.5212	12.0469	12.2295	12.1204	12.0063	10.6868	9.74626				50.3	-0.616	0.90429	0.50058	0.72549	0.82208	-0.75113	0.13374	1.48075	-0.74772	-0.78584	-0.68926	0.58445	-1.04716	-0.84389	0.98063	0.56796				50.3	0.33695	2.8787	3.14759	3.37729	5.06586	3.82316	4.73016	4.01634
	50.4	16.2917	9.95895	8.56515	11.0105	8.38645	10.5938	10.4675	11.9877	13.3077	11.9564	11.8297	12.2221	12.4949	12.8283	10.4577	9.66011				50.4	-0.44245	0.68483	-0.08408	0.78098	0.56246	-0.86529	-0.05083	1.54119	-0.95257	0.01514	-0.71315	0.89384	-0.62404	-0.69278	0.96263	0.54965				50.4	0.3557	3.90027	3.13045	3.52757	4.89176	4.37677	5.05648	3.10418
	50.5	16.2499	10.4846	8.73882	11.3615	8.54201	10.4918	9.90577	11.4154	13.4298	11.4873	11.2442	12.2155	12.882	13.2161	10.244	9.94117				50.5	0.05078	0.28064	-0.34282	0.26625	0.04566	-0.33843	-0.21047	0.82423	-0.67555	0.72414	-0.35085	1.00397	-0.14819	-0.69276	0.37192	0.68956				50.5	1.33233	4.74776	3.68545	3.37479	4.61194	5.26245	5.08316	2.53025
	50.6	15.944	11.0061	9.38316	12.0974	8.52782	10.4331	9.85325	11.4188	13.2215	10.2661	10.7987	12.4009	12.9882	12.935	10.0322	10.1567				50.6	0.26253	0.02175	-0.42273	-0.5472	-0.02024	0.44989	-0.13534	-0.15719	0.34527	0.92307	0.12475	0.56287	0.32304	-0.70056	-0.35527	0.97724				50.6	2.55842	4.97181	4.72444	3.01916	4.35342	5.8074	5.09542	2.70999
	50.7	15.2384	11.216	9.85971	12.752	9.00194	10.4574	10.6757	11.5145	12.7183	9.26189	11.2742	12.4603	12.7227	12.7215	10.1622	10.251				50.7	-0.12498	0.18993	-0.38951	-0.79574	0.45173	0.57008	-0.32564	-0.78714	1.2727	0.76341	0.30488	-0.10659	0.7133	-0.84686	-0.32183	0.99952				50.7	3.19157	4.93649	5.21007	2.99158	4.08571	5.43826	5.1717	3.1508
	50.8	14.5338	11.3901	9.73	12.8588	10.045	10.6167	11.8473	11.3521	12.3857	8.79019	12.3471	12.294	12.5291	12.9422	10.9703	10.3115				50.8	-0.64744	0.55438	-0.3779	-0.45937	0.99085	-0.1622	-0.92638	-0.61756	1.22364	0.43483	0.20907	-0.25872	0.82321	-1.29497	0.58026	0.8249				50.8	3.27735	5.20239	4.70709	3.35291	4.00035	4.63831	4.99072	3.69866
	50.9	14.3127	11.4383	9.78685	12.3909	10.407	10.9147	12.3917	11.3434	12.3556	8.58837	13.1974	12.2445	12.7137	13.104	12.1602	10.2937				50.9	-0.72996	0.69666	-0.72976	-0.27412	1.16769	-0.84406	-1.33952	0.03747	0.45464	-0.26686	0.1577	0.06198	0.7225	-1.75751	1.41659	0.67708				50.9	3.21524	5.89956	4.18956	3.48307	4.01856	4.09756	4.3554	4.34501
	51	14.659	10.9235	10.4752	11.4569	9.90272	10.7342	12.0699	11.737	11.9739	8.66582	13.6333	12.3578	13.1948	13.0474	12.9636	10.227				51	-0.41101	0.66339	-1.25756	-0.40226	1.15565	-0.92171	-1.03721	0.44125	-0.43384	-1.32319	0.14195	0.24868	0.78497	-1.60689	1.47489	0.49591				51	3.27369	6.48225	4.3118	3.11217	3.8838	4.08464	3.61199	4.43923
	51.1	15.1982	10.3962	11.0968	10.7638	9.68133	9.76753	11.286	12.1346	11.0102	9.08472	13.6833	12.3986	13.4744	13.1303	13.0133	10.122				51.1	-0.01457	0.93388	-1.37633	-0.45684	1.26521	-0.97136	-0.22091	0.41419	-1.07091	-2.06428	-0.02571	0.08687	1.05645	-0.62724	0.77902	0.22405				51.1	3.27271	6.27748	4.7342	2.66601	3.52898	4.65186	3.23206	3.77849
	51.2	15.6023	10.7151	11.276	11.0637	10.0822	8.92296	10.5358	12.2544	10.3544	9.66956	13.1589	12.3599	13.1442	13.2442	12.5867	10.0727				51.2	0.15983	1.56857	-1.07934	-0.35378	1.33092	-1.57957	0.34669	0.28449	-1.17029	-1.79656	-0.08356	-0.07838	1.09989	0.53782	-0.11982	0.06819				51.2	2.87134	5.57096	4.98327	2.74729	3.15755	5.45624	3.30272	3.30608
	51.3	15.7955	11.6321	11.2885	11.9578	10.4837	9.04088	10.3431	12.1855	10.6909	10.1953	12.2358	12.2804	12.5679	12.7246	12.1947	10.3921				51.3	-0.23779	1.84256	-0.6638	-0.45063	1.19224	-2.37163	0.26325	0.28644	-0.84307	-0.7318	0.29045	0.16045	0.87982	1.08187	-0.41736	0.30479				51.3	2.45551	4.99896	4.90517	3.3868	3.23446	5.94548	3.8225	3.71592
	51.4	15.7606	12.3454	11.2169	12.7114	10.3292	9.71841	10.7871	11.9231	11.3632	10.7763	11.48	12.2025	12.2617	11.6842	11.9937	11.0733				51.4	-1.1866	1.4888	-0.15505	-0.81964	0.97466	-2.51604	-0.20288	0.46494	-0.65996	0.05925	0.73659	0.71859	0.89407	0.85608	0.01856	0.76424				51.4	2.72111	4.3951	4.62314	4.13565	3.73914	5.70019	4.68145	4.46929
	51.5	15.4333	12.4214	10.783	13.1184	9.60206	10.0827	11.1751	11.3902	11.3687	11.2956	11.1934	12.1981	12.1184	11.0119	11.5105	11.4728				51.5	-2.05277	1.26022	0.22289	-0.93209	0.74058	-1.9074	-0.51197	0.84646	-0.80541	-0.18799	0.79883	1.06074	1.16848	0.3996	0.46686	0.93357				51.5	3.54593	3.53655	4.14535	4.84197	3.92374	4.91622	5.04288	4.71199
	51.6	15.0151	11.8017	10.1335	12.9375	9.05197	9.86128	11.1594	10.8584	10.7222	11.4431	11.4865	12.1147	11.9242	10.8618	10.5363	11.0104				51.6	-2.21719	1.55814	0.08581	-0.43847	0.49367	-1.18381	-0.26846	1.28871	-1.05673	-1.02501	0.56507	0.80983	1.29925	-0.02356	0.35642	0.66337				51.6	4.3873	3.06259	3.6412	5.34081	3.75919	4.16913	3.98353	4.45036
	51.7	15.0173	10.8654	9.84955	12.295	9.39124	9.52208	11.1575	10.7128	10.1658	11.2798	12.0472	11.7723	11.6417	10.7282	9.67099	9.92457				51.7	-1.65819	1.60912	-0.40147	0.11664	0.25483	-0.85207	0.28224	1.55035	-1.38337	-1.45192	0.38764	-0.08558	0.90363	-0.62521	-0.14546	0.31543				51.7	4.66707	3.5063	3.63817	5.11931	4.16036	3.71016	1.9321	4.08214
	51.8	15.4336	10.3775	9.87174	11.7987	10.0612	9.52974	11.3094	10.8142	10.1656	10.8549	12.1556	11.3319	11.3159	10.5992	9.3213	8.83999				51.8	-0.79182	0.6785	-0.76491	0.1179	0.13542	-0.79422	0.62941	1.57004	-1.68176	-0.857	0.52178	-1.25494	-0.12528	-1.09524	-0.57828	0.25619				51.8	3.97376	4.1335	4.11954	4.10611	5.00615	3.51155	0.74515	3.77318
	51.9	15.7271	10.936	9.71196	11.4532	10.0593	9.84147	11.3942	10.7067	10.649	10.1939	11.726	11.284	11.3093	10.6521	9.16255	8.22976				51.9	-0.10176	-0.80542	-0.7595	-0.24742	0.32032	-0.5384	0.72793	1.42197	-1.73819	0.37673	0.97196	-1.85191	-1.06228	-0.9853	-0.61916	0.32225				51.9	2.91933	4.2064	4.59763	3.26814	5.04637	3.35598	1.49174	3.74898
	52	15.5695	12.0686	9.39052	11.0717	9.54587	10.0486	11.5565	10.4317	11.3423	9.60484	11.4476	11.8354	11.8471	10.7746	9.18483	8.46582				52	0.26266	-1.91518	-0.42867	-0.52788	0.77672	-0.01071	0.53152	1.11727	-1.42742	1.18839	1.45062	-1.39464	-1.15149	-0.50245	-0.21265	0.13902				52	2.23591	3.93368	4.9012	3.2789	4.24739	3.03559	3.16407	4.05157
	52.1	14.9865	12.5829	9.28057	11.0283	9.54737	9.90655	11.9694	10.382	11.8815	9.23726	11.5741	12.565	12.4509	10.8697	9.6707	9.53474				52.1	0.61567	-2.19512	-0.12832	-0.57869	1.15701	0.40876	-0.23415	0.57232	-0.88459	1.1601	1.47618	-0.35377	-0.5728	-0.08025	0.39492	-0.42572				52.1	1.74727	3.56258	5.0817	3.39929	3.87673	2.88543	4.20038	4.37883
	52.2	14.4784	12.3021	9.24698	11.5727	10.3945	9.87202	12.309	10.899	11.9562	9.05684	11.6463	12.9135	12.5276	10.8181	10.4403	10.7773				52.2	1.05933	-1.76972	-0.09414	-0.39076	1.17712	0.37751	-1.16465	-0.18508	-0.46097	0.70754	0.8925	0.38728	0.18269	-0.07812	0.75143	-1.22727				52.2	1.25668	3.12383	5.10481	3.28448	4.1246	3.43434	4.01167	4.40269
	52.3	14.6599	11.8992	9.02397	12.345	11.3257	10.4232	12.242	11.8796	11.6548	9.19181	11.4686	12.7006	12.1789	10.6159	11.3255	11.5768				52.3	1.23247	-0.91534	-0.26549	-0.13945	0.78185	-0.02576	-1.42394	-0.79746	-0.21438	0.24532	0.28743	0.44851	0.71275	-0.40343	0.49554	-1.83698				52.3	1.10233	2.87846	5.06571	3.58016	4.04093	4.62627	2.91426	4.0702
	52.4	15.37	11.418	9.19318	12.8069	11.4233	11.1699	12.0857	12.5205	11.3192	9.72628	11.5208	12.3687	11.8218	10.8651	12.2078	11.8365				52.4	0.76531	0.02668	-0.66904	-0.22203	0.03507	-0.2634	-0.99459	-0.94421	0.00498	-0.29908	0.05376	0.22653	0.75833	-0.42713	-0.20531	-1.9552				52.4	1.57264	2.97558	5.05191	3.98492	3.59192	5.72016	1.83878	3.91275
	52.5	15.9332	10.7141	9.96192	12.4817	10.4789	11.3417	12.1936	12.2441	11.1631	10.3502	12.1778	12.4326	11.6388	12.0166	12.5591	11.8214				52.5	-0.17858	0.5262	-1.15183	-0.57299	-0.72927	-0.14554	-0.51597	-0.66652	0.19615	-0.99109	-0.28417	0.20071	0.52728	-0.01218	-0.89447	-1.71117				52.5	2.40617	2.88645	4.87441	3.57556	3.39838	6.14543	1.67141	4.15512
	52.6	15.755	10.4469	10.316	11.4258	9.27162	10.9275	12.1867	11.5121	11.1085	10.6658	13.0612	12.7307	11.7184	13.3407	12.1686	11.7782				52.6	-0.83574	0.32757	-1.08913	-0.57978	-0.98964	-0.21326	-0.23277	0.10509	0.50277	-1.34145	-0.86694	0.29379	0.34771	0.3601	-1.24297	-1.27055				52.6	3.04193	2.54544	4.69286	2.81007	3.50181	5.9719	2.36897	4.23092
	52.7	14.877	11.2885	9.6892	10.5666	8.6913	10.5505	11.7431	10.9819	10.9851	10.6389	13.2606	12.8115	12.045	13.6684	11.7861	11.7367				52.7	-0.72852	-0.24793	-0.39558	-0.08243	-0.47168	-0.81954	0.00019848	1.19285	1.08914	-0.94746	-1.18854	0.12768	0.17962	0.48074	-0.99008	-0.76215				52.7	3.14065	2.47461	4.75167	2.79014	3.65759	5.32778	3.16434	4.1813
	52.8	14.1204	12.6889	8.91745	10.6966	8.92733	10.4308	11.4168	10.7269	10.8784	10.3871	12.362	12.5379	12.2796	12.8065	12.0427	11.4876				52.8	-0.061	-0.8511	0.24972	0.34345	0.51902	-1.64226	0.26524	1.90822	1.57863	-0.07984	-1.10702	-0.26352	-0.02846	0.52482	-0.24331	-0.47314				52.8	2.99409	2.65602	4.4871	3.19706	3.70751	4.45291	3.46659	4.61377
	52.9	14.0537	13.2942	8.95685	11.5637	9.45144	10.3385	11.593	10.5006	10.7566	10.0211	11.3454	12.2621	12.2307	11.5772	12.5231	10.7934				52.9	0.68967	-1.26723	0.49213	0.36047	1.25353	-2.13083	0.77203	2.0156	1.57074	0.70783	-0.78962	-0.43994	-0.07355	0.60733	0.44923	-0.44865				52.9	3.35151	3.12178	3.73898	3.01516	3.73538	4.0727	3.1712	5.00661
	53	14.4449	12.5385	9.35699	12.4104	9.57602	10.1367	11.9829	10.2653	10.475	9.70183	11.2243	12.5886	12.2101	10.8127	12.5635	9.99407				53	0.99631	-1.13945	0.60869	0.23925	1.43919	-2.14097	1.5312	1.77709	1.17779	1.03525	-0.34328	-0.27939	0.16327	0.49421	0.62154	-0.40945				53	4.16447	3.7013	3.14372	2.57986	4.12129	4.66867	2.81122	4.42988
	53.1	14.9375	11.3773	9.22428	12.6701	9.20712	9.88944	12.432	10.2964	10.1936	9.54592	11.6383	13.4211	12.4955	10.7122	12.1281	9.61523				53.1	0.80285	-0.43323	0.81453	0.2036	1.46389	-1.88979	2.01425	1.25206	0.51204	1.05242	0.03152	0.06161	0.7191	-0.00515	0.21477	-0.26752				53.1	4.45227	3.69267	3.00737	2.67415	5.11944	5.6394	2.87473	3.56017
	53.2	15.6249	11.3532	8.88795	12.0563	8.72566	9.44758	13.0897	10.4596	9.98713	9.50819	12.0091	13.8225	12.9988	11.1223	11.5329	9.31147				53.2	0.49854	0.36136	0.93258	0.0185	1.70933	-1.4118	1.90616	0.49096	-0.26995	1.28273	0.22967	0.46657	1.47693	-0.31526	-0.41934	-0.09621				53.2	4.0294	3.26956	3.37006	2.8411	6.20943	6.03146	3.21621	3.27048
	53.3	16.4744	12.5999	9.07134	10.9013	8.52871	8.43124	13.741	10.3382	9.8341	9.53401	12.3272	13.2612	13.314	11.6625	11.1528	8.80051				53.3	0.09233	0.79285	0.74357	-0.62452	1.94374	-0.68384	1.36403	-0.1902	-0.89258	1.60342	0.38602	0.70167	1.86839	0.25515	-0.81828	-0.02412				53.3	3.55614	3.33331	4.08861	2.48496	6.35776	5.73158	3.79041	3.18664
	53.4	16.7432	13.6498	9.54407	10.0981	8.7617	7.27333	13.8596	10.0775	10.0202	9.71834	12.5897	12.1905	12.9106	11.8314	11.1779	8.61804				53.4	-0.39891	0.70316	0.44646	-1.47174	1.65266	0.03805	0.47927	-0.38885	-1.30141	1.29905	0.67514	0.58634	1.42859	1.34272	-0.75801	-0.19835				53.4	3.2801	3.98438	4.55282	2.29579	5.39479	5.1111	4.73895	2.97924
	53.5	16.2649	13.4806	9.81689	9.98344	9.2676	7.15367	13.4927	9.96966	10.6047	10.3179	12.7959	11.2722	12.0073	11.5737	11.4552	8.97977				53.5	-0.66721	0.39185	0.49565	-1.79837	1.05113	0.48338	-0.50904	-0.06439	-1.34384	0.34752	1.04707	0.07967	0.67541	2.01645	-0.42782	-0.51739				53.5	3.02074	4.28455	4.21837	3.14501	4.21939	4.50175	5.62881	2.6985
	53.6	15.83	12.6704	10.0112	10.2737	9.85463	8.19287	13.1619	9.81372	11.067	11.3372	13.0351	11.0481	11.4037	11.2414	11.6391	9.53074				53.6	-0.63286	0.38422	0.76766	-1.38906	0.80149	0.50409	-1.00183	0.41369	-0.89261	-0.48846	1.24827	-0.72087	0.32531	1.93744	-0.20437	-0.65971				53.6	2.90302	3.86742	3.38233	4.13548	3.33495	4.13794	5.6498	2.5881
	53.7	15.855	12.4039	10.4528	10.7761	10.4148	9.26726	13.0033	9.53364	11	12.068	13.0969	11.9283	11.3426	11.0908	11.4723	9.85136				53.7	-0.46587	0.65021	0.69538	-0.84112	0.80453	0.12049	-0.64393	0.66844	-0.18723	-0.66795	1.15884	-1.37621	0.20791	1.5086	-0.29498	-0.46687				53.7	3.06973	3.723	2.91033	4.00021	2.79018	4.0987	4.48915	3.16382
	53.8	16.1386	12.7186	11.0822	11.1948	10.9142	9.60177	12.8122	9.47606	10.6485	12.0352	12.6893	13.4995	11.4245	11.2281	11.0955	9.8761				53.8	-0.40342	0.54011	0.46326	-0.70012	0.51349	-0.34194	0.07856	0.63109	0.44668	-0.37316	0.86969	-1.51941	-0.01348	1.11294	-0.67809	-0.00322				53.8	3.17714	4.34437	3.15291	3.4038	2.7346	4.36913	2.77966	4.10691
	53.9	16.346	12.6961	11.402	11.2604	11.3127	9.21063	12.761	9.80671	10.5323	11.5912	12.2091	14.6447	11.3495	11.5712	10.8278	9.94827				53.9	-0.48469	-0.09589	0.48409	-0.90774	-0.12218	-0.50235	0.39253	0.57727	0.70953	-0.13144	0.58873	-1.08862	-0.35105	0.59358	-1.02891	0.39685				53.9	2.95859	5.03699	3.60822	3.39015	3.06972	4.6898	1.95101	4.47607
	54	16.2334	12.4898	11.0997	11.2261	11.4186	8.42961	13.201	10.2772	10.5326	11.0442	12.3456	14.5462	11.3692	11.8096	10.7237	10.2305				54	-0.37992	-0.65824	0.59001	-1.03276	-0.72073	-0.43776	0.27715	0.67137	0.42012	-0.07928	0.64038	-0.15239	-0.81539	-0.24387	-0.9987	0.49797				54	2.5647	5.34366	3.95594	3.8413	3.52581	4.79111	2.96499	4.23393
	54.1	15.9073	13.0168	10.3799	11.3847	11.1582	7.81329	13.7466	10.5414	10.3454	10.3866	13.0648	13.4251	11.6839	11.7567	10.945	10.383				54.1	0.12915	-0.85995	0.56437	-0.88106	-1.03911	-0.57942	0.40128	0.5892	-0.10958	-0.038	1.0307	0.81908	-1.15563	-0.95554	-0.71543	0.58125				54.1	2.44678	5.42187	4.27427	4.39551	3.86469	4.50113	4.8084	3.73932
	54.2	15.4577	13.6983	9.67434	11.7588	10.8385	7.6368	13.6707	10.7329	10.1606	9.67435	13.7194	12.2641	12.3658	11.7018	11.5966	10.0657				54.2	0.67096	-0.89592	0.2972	-0.78565	-1.05675	-1.15494	0.86424	0.10085	-0.32155	-0.00881	1.34261	1.18951	-0.9662	-0.98845	-0.59079	0.88197				54.2	2.89607	5.48436	4.56534	4.94846	4.05017	3.94066	5.53666	3.20539
	54.3	14.7887	13.437	9.43249	12.1112	10.7708	7.62773	13.2663	11.2168	10.1504	8.96373	13.9316	11.6823	13.3826	11.9047	12.0722	9.59204				54.3	0.63969	-0.82945	-0.01101	-0.92635	-0.77291	-1.74313	0.91747	-0.33411	-0.18954	0.03326	1.20534	0.83391	-0.36148	-0.52177	-0.73562	1.04024				54.3	3.35576	5.60583	4.90299	5.50999	4.25847	3.74909	4.70787	3.14641
	54.4	14.2646	12.7334	9.9865	12.0236	11.0054	7.67238	13.3559	11.7471	10.186	8.4254	13.8683	11.5541	14.0788	12.1836	11.8166	9.57582				54.4	-0.05278	-0.73076	0.18814	-1.04695	-0.40341	-1.6059	0.27081	-0.3896	0.11806	0.2109	0.72234	0.27973	0.21453	-0.11106	-0.7864	0.73529				54.4	3.16657	5.55663	5.11606	6.01038	4.50614	4.32683	3.43662	3.71047
	54.5	14.368	12.5153	11.2295	11.4251	11.2894	8.08434	13.6206	11.6841	10.3297	8.57929	13.6546	11.5698	13.8646	12.6261	11.0809	10.1535				54.5	-0.98063	-0.722	0.89417	-0.96211	-0.20708	-0.82282	-0.42289	-0.3305	0.76011	0.25814	0.40559	0.09915	0.65697	-0.03121	-0.43085	0.28194				54.5	2.52177	5.24855	4.93179	6.07167	4.8325	5.16122	2.87777	4.35012
	54.6	14.6493	12.6519	12.3041	10.8806	11.3868	8.83843	13.3707	10.9549	10.7264	9.50741	13.2863	11.6994	12.9183	13.5886	10.5044	10.8134				54.6	-1.7292	-0.49327	1.52755	-0.50801	-0.15887	-0.05375	-0.54709	-0.14358	1.62829	-0.19125	0.44231	0.32009	1.04399	-0.06205	0.03378	0.19108				54.6	2.21552	4.95763	4.53951	5.4149	5.22234	5.39604	3.1887	4.59524
	54.7	14.45	12.6132	12.2784	10.9139	11.533	9.40664	12.8207	10.143	11.0759	10.308	13.0388	11.9563	11.8907	14.6222	10.2064	10.9605				54.7	-2.02733	0.13642	1.66891	0.25847	-0.00614	0.41214	-0.27197	0.19331	2.13165	-0.66029	0.47162	0.6195	1.24161	0.21199	0.31356	0.4883				54.7	2.61182	4.68043	4.28538	4.44181	5.09238	4.62539	3.59892	4.275
	54.8	14.0934	12.3919	11.25	11.3609	11.7103	9.55683	12.5538	9.66244	11.0905	10.1917	13.2747	12.1281	11.3526	14.8891	9.81248	10.6288				54.8	-1.71477	0.64346	1.25306	0.64895	0.57934	0.56042	-0.01956	0.2088	1.86472	-0.42207	0.34719	0.55077	1.24043	0.78962	0.6357	0.74542				54.8	2.98186	4.27405	4.08829	3.77408	4.29677	3.48218	3.66609	3.56671
	54.9	14.1086	12.3552	10.3477	11.6185	11.3866	9.58009	12.9171	9.46276	10.9998	9.5991	13.6305	12.1198	11.3765	14.503	9.26896	10.0116				54.9	-0.92907	0.54246	0.52783	0.35393	1.46774	0.45673	0.20111	-0.2046	0.88738	0.22908	0.25115	0.17684	1.26318	1.048	1.04747	0.7692				54.9	2.63697	3.81555	3.68534	3.59612	3.71574	3.04923	3.55191	2.92479
	55	14.2214	12.7147	10.5935	11.4267	10.6956	9.71576	13.5921	9.47393	10.935	9.61966	13.5617	12.3132	11.7622	13.7523	9.19847	9.17586				55	-0.19533	0.02924	-0.14777	-0.00858	1.90244	0.2013	0.4636	-0.54585	-0.4308	0.52991	0.13437	0.1433	1.38789	0.60159	1.22571	0.80351				55	2.08013	3.25389	3.34396	3.53	3.58485	3.52506	3.47269	2.59318
	55.1	14.0489	13.4444	11.9273	11.063	10.4087	9.77905	13.7226	9.8154	10.8619	10.4825	13.3774	12.9952	12.4288	12.5293	9.94159	8.51605				55.1	-0.02952	-0.47749	-0.55253	-0.15197	1.64569	0.00152	0.58688	-0.46258	-1.54989	0.44908	-0.08958	0.52176	1.36621	0.00843	1.059	0.93888				55.1	2.1232	2.71339	3.51722	3.21571	3.63201	4.21383	3.92428	2.85414
	55.2	13.617	14.087	13.3198	10.892	10.5727	9.65873	13.2321	10.2671	10.9827	11.2705	13.2639	13.738	12.9427	11.1442	11.0153	8.53289				55.2	-0.19204	-0.536	-0.45471	-0.402	1.30433	0.15888	0.53807	-0.06022	-1.90569	0.39637	-0.13892	0.6603	0.89943	-0.18219	0.61622	1.09748				55.2	2.61223	2.72458	4.09898	2.94835	4.07968	4.62639	4.8263	3.70798
	55.3	13.0111	14.01	13.6902	11.0325	10.7005	9.47841	13.035	10.3449	11.3989	11.2262	12.7528	14.1012	12.7525	10.1928	11.9058	9.27259				55.3	-0.11955	0.17907	0.20944	-0.61944	1.27938	0.44516	0.60314	0.42078	-1.33127	0.47537	0.26506	0.02933	0.24908	-0.1725	-0.06941	1.27614				55.3	2.88417	3.36435	4.47082	3.13885	4.58904	4.52428	5.09639	4.40198
	55.4	12.386	13.403	12.73	11.3353	10.932	9.35308	13.4864	10.1894	11.6524	10.6292	11.947	14.1494	12.0533	9.87515	12.4719	10.35				55.4	0.09612	1.17093	1.00905	-0.34851	1.38191	0.39971	0.82444	0.69199	-0.28783	0.48456	0.76686	-1.08166	0.02972	-0.33408	-0.82786	1.20635				55.4	3.05704	4.44212	4.14456	3.44105	4.61246	3.68817	4.35123	4.39771
	55.5	11.9568	12.836	10.8287	11.544	11.5793	9.24575	13.8801	10.2853	11.357	10.1259	11.589	14.0021	11.5655	10.1812	12.8628	11.1751				55.5	-0.01595	1.52381	1.20806	0.19555	1.29676	0.19993	0.80409	0.50206	0.55752	0.17174	0.89058	-1.68196	0.24982	-0.67533	-1.37783	0.65583				55.5	3.69734	5.70645	3.36557	3.11896	4.37774	2.6125	3.55203	3.94544
	55.6	11.6487	12.398	8.76029	11.491	12.1538	8.75814	13.732	10.7482	10.9029	10.0472	11.8761	13.7	11.6547	11.1756	13.2388	11.367				55.6	-0.61997	1.16866	0.56111	0.32625	0.84497	0.06559	0.3663	0.02114	0.78386	-0.46215	0.78499	-1.16655	0.45124	-0.71902	-1.48932	-0.02587				55.6	4.44758	6.23115	3.01601	2.49487	4.0958	2.43286	3.69699	3.60454
	55.7	11.2609	12.1177	7.70946	11.1074	11.9888	7.6986	13.2196	11.4787	10.8479	10.42	12.324	13.5936	12.0228	12.4459	13.1669	11.1436				55.7	-1.16321	0.63281	-0.21672	-0.09743	0.1952	0.05406	-0.25567	-0.17987	0.52106	-0.97296	0.77388	-0.11863	0.37394	-0.21905	-1.10081	-0.44491				55.7	4.58343	5.61966	3.45941	2.62033	3.83965	3.35131	4.49984	3.68788
	55.8	11.006	12.023	8.18139	10.7182	11.3851	6.74128	12.6341	12.0972	11.1453	10.9115	12.6885	13.6963	12.154	12.9397	12.2271	10.8284				55.8	-0.84465	-0.01173	-0.23758	-0.61205	-0.26475	0.34274	-0.81508	0.10194	0.24831	-0.82043	0.91725	0.48425	0.1196	0.29243	-0.60154	-0.47284				55.8	4.40625	4.70568	4.14823	3.65898	3.73903	4.44762	4.86414	4.30356
	55.9	11.1153	11.9312	9.20679	10.8064	10.9387	6.78739	12.2826	12.0242	11.4128	11.1473	12.932	13.2726	11.9561	12.2919	10.7587	10.5175				55.9	0.01776	-0.59128	0.43383	-0.75559	-0.44763	0.74199	-1.05769	0.31162	0.16584	-0.33767	1.00714	0.41231	-0.16511	0.35132	-0.48747	-0.32032				55.9	4.34813	4.1045	4.54188	4.65325	3.55714	5.05321	4.53099	5.38463
	56	11.5319	12.0086	9.79954	11.3707	10.5464	7.87442	12.582	11.2109	11.5605	11.2927	12.8702	12.0682	11.7268	11.4837	9.45275	10.442				56	0.39173	-0.5913	1.09184	-0.3414	-0.36529	0.86428	-0.82037	0.13268	0.02358	-0.41036	0.80043	0.1644	-0.43456	0.16078	-0.76723	-0.42913				56	4.11916	3.64831	4.62696	4.89985	2.97364	5.30395	4.13903	6.17888
	56.1	12.1687	12.4784	9.90018	12.1034	9.96568	9.16026	13.5124	10.2867	11.5998	11.5577	12.7601	10.9879	11.7185	11.126	8.97081	10.6				56.1	0.02072	-0.44366	1.30771	0.39371	0.12692	0.90626	-0.3652	-0.02028	-0.4567	-0.96039	0.4392	0.18987	-0.47984	0.12819	-1.13976	-0.85765				56.1	3.66133	2.96451	4.4158	4.75104	2.29139	5.63651	4.10654	6.01406
	56.2	12.769	12.7474	9.90874	12.6662	9.59261	9.65247	14.4008	9.85267	11.4738	11.582	13.0428	11.0219	12.0379	10.8923	9.4253	10.3114				56.2	-0.56397	-0.97158	1.181	0.89022	0.73044	1.14184	-0.27782	0.00504	-0.90914	-1.16967	0.22725	0.35159	-0.24501	0.35224	-1.47322	-1.12322				56.2	3.56327	2.09223	4.01814	4.4063	2.32619	6.02869	4.28813	5.37748
	56.3	12.885	12.309	10.279	12.8872	9.93546	9.04042	14.6098	9.80827	11.3625	11.0823	13.3364	12.135	12.4225	10.8862	10.3066	9.33565				56.3	-0.86588	-1.70921	1.1341	0.7557	0.91149	1.11516	-0.75569	-0.01492	-0.66369	-0.86854	0.10657	0.3387	-0.06957	0.54903	-1.64642	-0.88682				56.3	3.90362	1.66499	3.9974	3.91293	3.06452	5.89733	4.43884	4.98566
	56.4	12.7176	11.7086	11.1442	12.7955	10.7983	8.22741	14.1199	9.57432	11.4378	10.4085	13.1972	13.415	12.4909	11.4862	11.0175	8.58591				56.4	-0.60178	-1.7603	1.35936	0.44649	0.66887	0.41596	-1.31284	0.1006	0.14934	-0.36061	-0.06568	0.32314	-0.20845	0.55002	-1.52294	-0.44728				56.4	3.90086	2.10823	4.54761	3.98593	3.53348	5.22433	4.75128	4.65717
	56.5	13.1968	11.5077	12.0269	12.3627	11.4382	8.20846	13.5086	9.08466	11.4581	9.9718	13.062	13.8717	12.3508	12.3948	11.2287	8.67003				56.5	0.06651	-1.13948	1.43058	0.69694	0.20774	-0.34267	-1.42215	0.50681	0.81495	0.15474	-0.12563	0.51744	-0.51407	0.27712	-1.21667	-0.16755				56.5	3.36854	2.99797	5.18765	4.58381	3.31665	4.78916	5.12004	3.9491
	56.6	14.1988	11.4182	12.257	11.6964	11.5884	8.776	13.3091	9.06445	11.2836	9.82791	13.2708	13.3526	12.3565	12.8711	11.1335	9.06605				56.6	0.36	-0.35072	1.07172	1.12361	-0.26448	-0.58149	-1.03325	0.85642	1.03905	0.30538	-0.079	0.59475	-0.61689	-0.35598	-0.85665	-0.00855				56.6	2.97603	3.78702	5.58131	4.62992	2.78467	4.96783	4.98976	3.1343
	56.7	14.6677	11.1305	11.8405	11.3231	11.6426	9.21352	13.2648	9.8716	11.323	9.84617	13.3276	12.7981	12.3972	12.4487	10.9564	9.32944				56.7	-0.04684	0.18714	0.67622	0.97219	-0.44914	-0.55791	-0.57116	0.84856	1.02218	-0.000496451	-0.13161	0.27204	-0.46255	-0.83244	-0.4203	0.07029				56.7	3.02857	4.48139	5.46233	4.18081	2.35216	5.25417	4.73733	2.81632
	56.8	14.5021	10.9868	11.1225	11.5595	11.6933	9.24162	12.8489	10.9337	11.8207	9.95938	12.8781	12.9042	12.106	11.6911	10.7693	9.64839				56.8	-0.55609	0.1866	0.4021	0.42282	-0.42997	-0.59544	-0.48637	0.57849	0.9592	-0.31462	-0.09116	-0.10363	-0.37032	-0.59642	-0.06669	-0.07533				56.8	3.32384	4.76436	4.60313	3.92437	2.21409	5.17879	5.04509	2.96578
	56.9	14.4072	11.3926	10.0134	12.0161	11.6069	8.94862	12.116	11.6471	12.1648	10.1604	12.316	13.2461	11.4995	11.3936	10.8006	10.007				56.9	-0.774	-0.19986	0.07975	-0.25239	-0.58902	-0.70487	-0.70251	0.33226	0.94654	-0.27288	0.32672	-0.00395	-0.36125	0.01118	-0.11818	-0.27828				56.9	3.79624	4.16087	3.82151	3.68561	2.31273	4.75992	5.35224	2.77797
	57	14.4813	12.1819	8.78043	12.4786	11.6078	8.56718	11.7216	12.0123	11.7094	10.2236	12.152	13.075	11.1225	11.2433	10.8875	10.0107				57	-1.06978	-0.33665	-0.01631	-1.129	-0.86598	-0.81682	-0.82307	0.34155	1.03077	0.04609	0.90036	0.50775	-0.18401	0.26122	-0.49768	-0.14048				57	4.38458	3.44591	4.07712	3.62945	2.78563	4.0441	5.27356	2.03249
	57.1	14.1888	12.5616	8.34397	12.9105	11.7176	8.21174	12.1096	12.0568	10.7608	10.0158	12.5353	12.2077	11.4438	10.6992	10.6262	9.73127				57.1	-1.61754	-0.10955	0.41627	-1.70404	-0.73845	-0.7074	-0.83533	0.38374	0.9483	0.22445	1.25588	0.77814	-0.00791	-0.17594	-0.84125	0.36954				57.1	4.36673	3.46262	4.8358	4.14525	3.94545	3.18334	5.34503	1.57861
	57.2	13.5905	12.0972	8.77458	12.7443	11.6245	7.71925	12.891	11.7605	10.0446	9.85264	13.1258	11.1808	12.139	10.2111	10.0793	9.59695				57.2	-1.9084	0.04305	1.01854	-1.62548	-0.14793	-0.20401	-0.85502	0.04174	0.41206	0.08728	1.18851	0.40515	-0.05397	-0.89334	-0.99224	0.98917				57.2	3.46533	3.6958	5.10439	4.90496	5.17753	2.5534	5.45683	1.80861
	57.3	13.3865	11.5055	9.35997	11.9443	11.2129	7.11299	13.3779	11.43	9.81117	10.0484	13.3718	10.7027	12.3856	10.3254	9.71507	9.57171				57.3	-1.77715	0.11848	1.34904	-1.3245	0.42111	0.35395	-0.52092	-0.43321	-0.16351	-0.17578	0.71804	-0.27706	-0.05023	-1.05916	-0.771	1.31414				57.3	2.55679	3.35344	4.89175	5.40574	5.4834	2.46367	5.09854	2.38162
	57.4	13.6295	11.5735	9.70801	11.5213	10.665	6.8673	13.4736	11.3871	9.83846	10.3246	12.771	11.0537	11.963	10.5855	9.92198	9.35639				57.4	-1.60782	0.33094	1.32357	-1.01461	0.63133	0.65421	0.35559	-0.49306	-0.25686	-0.4805	0.23111	-0.78559	0.07233	-0.41306	-0.18531	1.13801				57.4	2.19283	2.66888	4.48421	5.38549	5.10136	2.86599	4.53757	3.30844
	57.5	13.693	11.8059	9.81628	11.907	10.3415	7.33859	13.4227	11.5722	9.90259	10.2163	11.3734	12.0388	11.4878	10.5445	10.457	9.08624				57.5	-1.39815	0.26523	0.98448	-0.49753	0.51252	0.8791	1.12139	-0.22611	0.02604	-0.6844	0.06142	-0.96938	0.07211	0.54299	0.09843	0.90184				57.5	2.23315	2.65928	3.9272	4.81559	4.96576	3.39813	4.17357	4.50127
	57.6	13.452	11.2596	9.90072	12.3524	10.3859	8.21199	13.2298	11.6926	10.2343	9.84858	10.388	13.0813	11.1989	10.6365	10.6106	8.91388				57.6	-0.885	-0.43663	0.45914	0.09624	0.35945	0.95813	0.95551	-0.1088	0.49864	-0.49859	0.05104	-0.68453	0.10374	1.29563	-0.13972	0.9579				57.6	2.72565	3.38199	3.50601	4.05047	5.04378	3.9246	3.84967	5.1099
	57.7	13.0932	10.1573	10.02	12.2592	10.4693	8.83931	12.8235	11.6837	11.1617	9.66576	10.7242	13.7035	10.8715	10.965	10.2095	8.79119				57.7	-0.28145	-1.25028	-0.11615	0.36074	0.50213	0.56959	-0.07225	-0.2221	1.08013	-0.05787	0.02045	0.07488	0.29223	1.65121	-0.31948	0.98338				57.7	3.59981	3.54513	3.42265	3.53498	4.85134	4.64247	3.6576	4.33918
	57.8	12.5536	9.58495	10.0428	11.9684	10.2639	8.95599	12.4629	11.6059	12.2839	9.80205	11.5497	13.9066	10.9385	11.2324	9.90013	9.10243				57.8	0.05907	-1.47762	-0.38939	0.14223	0.72708	-0.04615	-0.9454	-0.3726	1.47281	0.18564	0.12342	0.83471	0.32684	1.70097	-0.17334	0.63768				57.8	4.32584	2.58209	3.51173	3.29635	4.61304	5.35376	3.84271	2.5862
	57.9	12.0229	10.113	9.94051	11.9407	9.92837	8.86394	12.6687	11.265	12.9095	10.255	11.9343	13.8076	11.7346	11.5332	9.94271	10.1426				57.9	0.28969	-1.01092	-0.17185	-0.19731	0.43584	-0.38203	-0.87838	-0.5127	1.48519	0.24337	0.47444	1.05293	-0.09354	1.66316	0.08035	0.18836				57.9	4.39695	1.63859	3.53774	3.02002	4.55262	5.36705	4.09247	1.29181
	58	12.0416	11.2362	9.65087	12.0608	9.86584	8.90994	13.6669	10.6339	12.9638	10.9925	12.1569	13.6463	12.5758	11.9311	9.76974	11.3974				58	0.79838	-0.20029	0.15293	-0.27229	-0.18156	-0.28589	-0.18077	-0.51103	1.27296	0.36951	0.94223	0.44606	-0.97887	1.6093	0.1298	0.02241				58	3.81152	2.10862	3.43025	2.78263	4.4688	4.43356	4.36341	1.47197
	58.1	12.7342	12.1747	9.30498	12.0953	10.3743	9.02629	14.7483	9.9983	12.6578	11.7424	12.5478	13.7626	12.8394	12.1975	9.5059	12.1182				58.1	1.395	0.41277	0.44884	-0.1663	-0.55097	-0.04153	0.4192	-0.27478	0.98793	0.50233	1.39454	-0.8021	-1.87307	1.2193	-0.0749	0.04289				58.1	3.01734	3.68674	3.53839	2.84866	4.21653	3.17189	4.7372	2.70244
	58.2	13.5521	12.8295	9.19287	12.0573	11.4007	9.10776	15.045	9.53231	12.1492	12.0679	12.8895	14.0305	12.6549	12.3209	9.93089	12.0506				58.2	1.45295	0.33464	0.82907	-0.00919	-0.79694	-0.02687	0.6483	0.08013	0.56521	0.40514	1.89503	-1.87241	-2.22569	0.28293	-0.28328	-0.000138219				58.2	2.35833	4.98015	4.10389	3.33409	3.84458	2.546	4.74409	3.73725
	58.3	13.8985	13.3383	9.25514	11.9879	12.6186	8.94864	14.5386	9.40087	11.5272	11.834	13.1699	13.8885	12.4003	12.2621	10.9212	11.5607				58.3	0.90997	-0.44193	0.967	0.33669	-0.99566	-0.10921	0.62803	0.45547	0.17764	-0.14101	2.21338	-2.01079	-2.00047	-0.63157	-0.46501	-0.08991				58.3	1.87115	5.18306	4.82381	4.07307	3.62817	2.93535	4.37059	3.93258
	58.4	13.9331	13.5059	9.39034	11.8431	13.5213	8.51069	13.5163	9.75692	10.7453	11.322	13.5861	13.0948	12.2601	11.8443	11.7595	11.0892				58.4	0.42136	-1.31474	0.77213	0.86272	-0.89771	0.03429	0.55873	0.93725	0.09712	-1.07621	1.86617	-1.38323	-1.42203	-0.90872	-0.75587	-0.09382				58.4	1.77555	4.21723	5.24883	4.57803	3.55099	3.67888	3.99333	3.46738
	58.5	14.2484	13.1312	9.69118	11.6967	13.6727	8.48404	12.423	10.1708	10.1622	10.762	13.8088	12.2154	12.2239	11.3279	12.217	10.8638				58.5	0.46898	-1.68969	0.72501	1.35701	-0.76054	0.22243	0.72648	1.27519	0.262	-1.81197	1.06113	-0.63271	-0.67217	-0.60829	-1.08897	0.10303				58.5	2.45775	3.03206	5.21658	4.6865	3.34593	3.90343	3.72688	2.59877
	58.6	14.6845	12.6273	10.0296	11.6135	13.0698	9.35331	12.1715	10.285	10.262	10.4512	13.4431	11.86	12.2616	11.1764	12.3531	10.8443				58.6	0.94048	-1.54185	1.01155	1.65452	-0.76486	0.10715	1.10073	0.95155	0.57673	-1.53304	0.53508	-0.1596	-0.06714	-0.07488	-1.24018	0.44978				58.6	3.82337	3.00448	4.7956	4.46578	3.38729	3.63329	3.58507	1.96092
	58.7	14.5603	12.5143	10.1428	11.4618	11.8608	10.6694	12.8781	10.6733	10.8721	10.7743	12.7763	11.8187	12.2375	11.4944	12.0879	10.8581				58.7	1.3894	-1.12117	1.18369	1.61278	-0.56465	-0.03121	1.11114	0.214	1.01651	-0.31841	0.52956	-0.08778	0.0455	0.37224	-0.94885	0.70954				58.7	5.03355	4.12022	4.14498	3.96767	3.91778	3.55079	3.58161	2.32949
	58.8	13.9335	12.514	10.078	11.2553	10.3189	11.4946	13.3978	11.5651	11.4465	11.5729	12.1066	11.9104	11.9887	12.0651	11.3345	10.8963				58.8	1.5498	-0.48323	0.85519	1.39397	-0.1973	0.22929	0.58936	-0.26673	1.30334	0.60421	0.73896	-0.11566	-0.30836	0.57124	-0.27382	0.83357				58.8	5.21643	5.0677	3.66651	3.55586	4.43582	3.7834	3.72199	3.3346
	58.9	13.3763	12.3073	10.2646	11.1563	9.17861	11.0051	13.1021	12.1689	11.6103	12.0257	11.4994	12.3954	11.5775	12.4397	10.6325	10.8464				58.9	1.47338	0.1419	0.26059	1.27222	0.06491	0.59206	0.04822	-0.33954	1.06347	0.27672	0.96002	0.24792	-0.78605	0.70012	0.374	0.9429				58.9	4.54612	4.86203	3.5645	3.51511	4.57092	3.8704	4.01559	3.98193
	59	13.1513	12.1564	10.6912	11.0442	8.9795	9.74818	12.4127	11.8503	11.268	11.7839	11.1228	13.0242	11.1963	12.2802	10.8613	10.4328				59	1.15298	0.34732	-0.18977	1.05682	0.26985	0.76748	-0.36167	-0.3338	0.50963	-0.86815	1.17678	0.94926	-1.20409	1.173	0.7327	0.9312				59	4.08751	3.95549	3.46484	3.75594	4.38444	3.94437	4.37255	4.18919
	59.1	12.9184	12.1915	10.8203	10.7506	9.5047	9.13074	11.7518	10.965	10.7535	11.3587	11.0295	13.3369	10.9902	11.8158	11.8523	9.57685				59.1	0.52011	0.17009	-0.55046	0.62006	0.46909	0.96788	-0.75884	-0.6174	0.22656	-1.61321	1.11987	1.41766	-1.43791	2.00996	0.71588	0.51428				59.1	4.07105	3.5287	3.03749	4.0871	3.89091	4.4165	4.50119	4.23958
	59.2	12.2655	12.0619	10.7827	10.5085	10.29	9.4231	11.3432	10.2793	10.7888	11.1818	11.1218	13.3141	11.0648	11.355	12.7173	8.73459				59.2	-0.04113	0.01641	-0.87623	0.30589	0.56896	1.31391	-1.01636	-1.21179	0.18887	-1.47927	0.60165	1.28661	-1.13656	2.54567	0.28604	-0.19413				59.2	3.87245	3.58029	2.54932	4.34004	3.17703	4.67342	4.20703	3.90956
	59.3	11.5739	11.356	11.2014	10.6745	11.1271	9.95026	11.3373	10.0572	11.6199	11.2152	11.3843	13.2464	11.413	11.1661	12.9233	8.60255				59.3	-0.13795	-0.01714	-0.85899	0.30474	0.40327	1.59248	-1.08513	-1.51563	-0.03957	-0.89909	-0.07713	0.92636	-0.19607	2.18113	-0.26073	-0.7231				59.3	3.68486	3.39683	2.59088	4.35513	2.55517	3.88518	3.87026	3.19548
	59.4	11.4899	10.2955	11.8969	11.194	11.8951	10.0369	11.7553	10.4178	12.6015	11.3133	11.8151	13.5835	12.0279	11.4885	12.3224	9.22405				59.4	0.01488	-0.19039	-0.49776	0.5075	-0.02184	1.60576	-0.9282	-1.12853	-0.38664	-0.38336	-0.39468	0.77917	0.90847	1.13579	-0.47567	-0.84844				59.4	3.96477	3.09014	3.09825	4.38815	2.43445	2.66964	4.07138	2.7613
	59.5	11.9879	9.77286	12.2947	11.597	12.4788	9.37665	12.4222	11.4355	13.0981	11.2611	12.3309	14.4193	12.8929	11.8533	11.3032	9.96472				59.5	-0.00167	-0.50825	0.08533	0.71172	-0.40246	1.3888	-0.45244	-0.63919	-0.54623	-0.20285	-0.17966	0.62771	1.47605	0.26214	-0.43891	-0.61664				59.5	4.46512	2.9777	3.28276	4.61956	2.98972	2.3975	4.6623	2.95339
	59.6	12.5508	10.3399	12.341	11.7589	12.8096	8.30573	12.7928	12.4108	13.0235	10.9042	12.8079	15.2669	13.44	11.5023	10.7858	10.2709				59.6	-0.16449	-0.84308	0.95211	0.62703	-0.65185	0.97224	0.02793	-0.5576	-0.58344	-0.18585	0.12087	0.28731	1.26876	0.04408	-0.44988	-0.28337				59.6	4.66621	3.1938	2.94718	4.59757	3.80873	3.19338	4.70752	3.30673
	59.7	12.879	11.4134	12.0191	12.1552	12.6909	7.42059	12.5816	12.2458	12.6273	10.4167	13.0932	15.6218	13.0149	10.6352	10.8667	10.156				59.7	-0.32687	-1.31799	1.7092	0.22322	-1.12292	0.17366	-0.20924	-0.58697	-0.60803	0.01605	-0.000537215	0.04641	0.79587	0.14053	-0.37869	-0.11808				59.7	4.34051	4.05737	2.73138	3.96049	4.30132	3.97305	3.70689	3.39142
	59.8	13.1805	12.0977	11.2538	12.7973	12.0992	6.89908	12.3333	10.8493	12.2491	10.1065	13.0046	15.3857	12.2319	10.2741	10.7307	10.0646				59.8	-0.56381	-1.70499	1.75922	-0.15684	-1.80923	-0.81423	-1.10998	-0.59954	-0.4638	0.46375	-0.41676	0.15975	0.64968	0.05442	0.0086	-0.06879				59.8	3.82887	5.10838	2.96912	3.06979	4.29011	4.09719	2.54314	3.42632
	59.9	13.4902	12.3808	10.2869	13.0632	11.4133	6.51622	12.5097	9.40702	11.9909	10.1925	12.5339	15.0801	12.3624	11.0237	10.3717	10.2468				59.9	-0.7607	-1.40345	1.0829	-0.18103	-2.00731	-1.16023	-1.49145	-0.74357	-0.17263	1.04774	-0.57043	0.5467	0.6657	-0.34682	0.59221	0.0367				59.9	3.39171	5.12202	3.42572	2.64812	3.98473	3.83645	2.55732	3.57147
	60	13.6089	12.584	9.44591	12.8798	10.8557	6.32874	12.806	8.97787	11.4816	10.6802	12.0692	15.1726	13.3012	12.4345	10.5997	10.6412				60	-0.6756	-0.7783	0.00993	0.27461	-1.37909	-0.66682	-0.6002	-0.93851	0.13324	1.57459	-0.31141	0.85379	0.39437	-0.70852	1.01754	0.05076				60	3.33015	4.10153	3.71297	2.95265	3.94567	3.59743	3.50122	3.87217
	60.1	13.6381	12.4111	8.87186	12.6267	10.4397	6.56688	12.6591	9.36589	10.6812	11.1524	12.1944	15.2521	13.7761	13.4159	11.404	11.1392				60.1	-0.43604	-0.84436	-0.9774	0.85915	-0.48011	-0.09959	0.82091	-1.11638	0.53661	1.77859	-0.08433	0.86802	0.05878	-0.52183	0.94147	-0.2476				60.1	3.98949	3.22145	3.57638	3.56024	4.61569	3.62842	3.97045	4.55341
	60.2	13.7307	11.7803	8.61169	12.0882	10.2168	7.06421	12.0205	10.149	10.234	11.1746	12.8902	14.7127	13.3088	13.205	11.8005	11.4443				60.2	-0.33022	-1.48979	-1.16479	0.86828	0.21634	0.24607	1.53902	-1.11765	1.04457	1.64159	-0.1274	0.76092	0.08013	0.20646	0.48011	-0.62342				60.2	4.70332	2.85154	3.33682	4.0804	5.52403	4.15496	3.79182	5.37193
	60.3	13.8255	11.5573	8.68209	10.9289	10.0109	7.30392	11.4785	11.2095	10.2795	10.8718	13.0874	13.6882	12.6042	11.8233	11.4207	11.3894				60.3	-0.26081	-1.70905	-0.54419	0.10902	0.57559	0.44629	1.32911	-0.81174	1.42232	1.43164	-0.27841	0.63395	0.35797	0.87753	0.13074	-0.77648				60.3	4.57509	2.80179	3.7418	4.42723	5.6883	4.99892	3.76029	5.76907
	60.4	13.759	12.2191	8.88599	9.64246	9.44136	7.05326	11.4341	11.9378	10.485	10.5337	12.1963	12.7244	12.2033	10.0573	10.8867	10.9666				60.4	-0.05237	-1.14193	-0.03082	-0.69945	0.41546	0.45333	0.80427	-0.56241	1.4519	1.31181	-0.40847	0.40887	0.67016	1.12973	0.07599	-0.87497				60.4	3.73014	3.26936	4.60127	4.60074	4.78716	5.36722	3.64932	5.77532
	60.5	13.483	12.9204	9.19377	9.14242	8.7638	6.49368	11.5956	11.8737	11.057	10.3518	11.2019	12.0357	12.0975	9.04857	10.6768	10.1853				60.5	0.1385	-0.30766	-0.16298	-0.83275	0.04419	0.37815	0.48175	-0.61584	1.28709	1.20161	-0.61234	0.17322	0.77058	1.13345	0.01733	-0.90825				60.5	2.8552	4.23402	4.99672	4.72186	3.53256	4.81288	2.88073	5.65855
	60.6	13.2992	12.6411	9.85249	9.7374	8.73317	5.98922	11.516	11.3493	12.1247	10.7303	11.1736	11.5441	12.2939	9.34049	10.8818	9.3551				60.6	0.31455	0.19592	-0.53096	-0.37253	-0.15392	0.41989	0.5106	-0.55322	1.41713	1.06473	-0.93173	-0.03229	0.42131	1.07558	-0.22663	-0.66533				60.6	2.2387	4.97396	4.96718	4.90968	2.77872	3.92353	2.14418	5.27811
	60.7	13.3584	11.2208	10.4905	10.6383	9.24317	5.86022	11.3454	10.7809	12.9276	11.8531	11.7942	11.4768	12.594	10.5217	11.314	8.86694				60.7	0.58347	0.28978	-0.55337	0.23314	-0.27721	0.56305	0.61136	-0.17392	1.8557	0.92999	-1.06855	-0.26532	-0.01134	0.83688	-0.44005	-0.41646				60.7	1.71754	4.94835	5.11221	5.17081	2.78069	3.24984	2.42939	4.72887
	60.8	13.2633	9.34081	10.5195	11.0518	9.5844	6.06979	11.6158	10.4447	12.7372	13.1331	12.0922	11.9929	12.734	11.764	11.6124	8.76885				60.8	0.73507	0.46558	-0.21696	0.69185	-0.12549	0.462	0.38708	-0.03373	1.82558	0.80639	-0.73699	-0.31453	0.02523	0.44105	-0.50526	-0.56082				60.8	1.55304	4.74256	5.19879	5.41091	3.16836	2.79162	3.45253	4.3898
	60.9	12.5975	8.15719	10.2796	11.2843	9.67771	6.38236	12.3263	10.4627	11.8062	13.8413	11.9545	12.5011	12.8266	12.3032	11.5831	8.78221				60.9	0.58422	0.87605	0.17776	0.96946	0.47765	-0.22859	-0.10173	-0.18894	1.11311	0.80393	-0.3025	-0.11626	0.40014	0.27728	-0.38781	-0.77894				60.9	2.13467	5.04845	4.65207	5.33951	3.44826	2.66715	4.28416	4.09085
	61	11.6415	8.2893	10.145	11.9713	9.82187	6.85425	12.7293	10.6391	11.1624	13.8247	11.7804	12.4971	12.9005	11.9866	11.4324	8.83835				61	0.17817	0.99563	0.4924	1.23835	0.93971	-1.16404	-0.33692	0.07338	0.57676	0.93362	-0.45499	0.09029	0.78287	0.63072	0.08588	-0.39599				61	3.18852	5.49399	3.7446	4.69604	3.49676	3.12628	4.67129	3.4132
	61.1	11.4018	9.29492	9.93417	12.9353	10.0042	7.44847	12.339	10.5281	11.4198	13.3298	11.7121	12.0669	12.8058	11.6412	11.6558	9.2684				61.1	-0.34205	0.77535	0.71285	1.62934	0.70473	-1.58439	-0.02553	0.82995	0.56374	0.86125	-1.10518	0.07969	0.92831	1.2603	0.66708	0.37187				61.1	4.3188	5.39498	3.31482	3.89004	3.50158	3.753	4.77185	2.67286
	61.2	12.0116	10.4465	9.9226	13.4766	10.2089	7.8065	11.622	9.97773	12.0593	12.6462	11.6844	11.5465	12.4584	11.8038	12.3254	10.0442				61.2	-0.80703	0.7357	0.82755	1.92316	0.0063	-1.21784	0.62881	1.47085	0.51638	0.44899	-1.37185	-0.27155	0.60485	1.66072	0.96532	0.77053				61.2	5.01989	4.85979	3.54838	3.59005	3.51222	3.77782	4.57889	2.74739
	61.3	12.3907	11.3723	10.4496	13.3918	10.4703	7.87661	11.388	9.44737	12.058	12.0374	11.5221	11.5611	11.8102	11.9383	12.9441	10.3817				61.3	-0.93378	0.90882	0.84361	1.80532	-0.63997	-0.38632	1.33044	1.67475	0.03482	0.0048	-0.97131	-0.62664	0.13286	1.5697	1.26363	0.592				61.3	4.71855	4.3142	3.97784	3.68694	3.55651	3.30845	4.02389	3.72832
	61.4	12.3395	11.9811	11.1681	13.1766	10.4625	7.79161	11.8325	9.34604	10.8105	11.825	11.1649	12.3625	11.0772	11.5557	13.0738	9.92749				61.4	-0.44601	0.76955	0.57562	1.4148	-0.8691	0.42723	1.9132	1.60052	-0.6486	-0.39015	-0.56203	-0.45978	0.06672	1.0614	1.83879	0.02256				61.4	3.58495	3.75613	4.32112	3.73603	3.69422	3.049	3.60084	4.68799
	61.5	12.6049	12.3057	11.7149	12.9985	10.104	7.69527	12.4104	9.7143	8.99724	11.879	10.8961	13.3616	10.7781	10.9202	12.5115	9.31045				61.5	0.35115	0.12362	0.00531	1.16079	-0.50611	0.78934	1.95783	1.47079	-1.08247	-0.82124	-0.48672	0.19987	0.25222	0.19051	2.09328	-0.59326				61.5	2.4178	3.07128	4.51994	3.69989	3.71679	3.30658	4.04939	5.13873
	61.6	13.28	12.3842	11.8871	12.6003	9.87441	7.90925	12.7785	10.4269	8.06041	11.6648	10.9018	13.9494	11.283	10.6819	11.5359	9.0187				61.6	0.84304	-0.5335	-0.28965	1.00296	0.24796	0.57828	1.14504	1.25634	-1.19388	-1.05137	-0.47085	0.90599	0.18414	-0.81162	1.49016	-0.95504				61.6	1.67147	2.53515	4.4688	3.6413	3.57856	3.69357	4.93901	5.15413
	61.7	14.0026	12.3064	11.6209	12.157	10.0123	8.50029	13.0492	11.1037	8.3623	11.1707	11.2165	13.9331	12.3092	11.0054	10.8809	8.90664				61.7	0.79375	-0.71522	0.00274	0.55602	0.8514	0.21651	0.11955	0.87751	-1.07303	-0.97885	-0.54441	1.25679	-0.07532	-1.3003	0.63864	-1.13011				61.7	1.38754	2.27406	4.2363	3.47222	3.57399	3.66748	5.12655	4.63266
	61.8	14.5469	12.0953	11.5646	11.8601	10.2655	9.05351	12.9865	11.3176	9.26127	10.775	11.8401	13.5373	12.9845	11.3523	10.8955	8.98066				61.8	0.38351	-0.58504	0.38279	-0.09607	0.8696	0.09821	-0.25312	0.5088	-0.57101	-0.96484	-0.754	1.08575	-0.22396	-1.19637	0.23823	-1.21782				61.8	1.57631	2.09837	3.82137	3.17561	3.95139	3.28691	4.56601	3.7383
	61.9	14.5635	11.6105	12.2095	11.5141	10.6281	9.02683	12.488	11.0284	10.2812	10.5058	12.3511	13.2174	12.9841	11.2754	10.9507	9.29126				61.9	-0.02775	-0.46636	0.59425	-0.6455	0.37732	-0.02857	-0.03486	0.31026	0.16156	-1.22116	-0.604	0.70539	-0.30761	-1.1523	0.08865	-1.27954				61.9	2.03594	1.96975	3.24612	3.08998	4.73329	2.98677	4.07602	3.19679
	62	14.0614	10.9063	12.86	11.1699	11.3225	8.26438	12.1359	10.4132	10.922	10.2877	12.2822	13.0186	12.7836	10.7947	10.3859	9.43869				62	-0.24871	-0.22198	0.92822	-1.00318	-0.17146	-0.21423	0.17435	0.11921	0.36062	-1.42666	-0.08576	0.65358	-0.39887	-1.29443	-0.18803	-1.57007				62	2.4818	1.67081	2.84591	3.76532	5.43606	2.91686	4.09116	3.34921
	62.1	13.6002	10.2823	12.6948	11.0625	12.1714	7.3292	12.192	9.7187	10.8695	10.4301	11.7543	12.7778	12.5675	10.3607	9.5062	9.25295				62.1	-0.30568	0.14409	1.19072	-1.06547	-0.54156	-0.09566	0.04272	-0.22383	-0.24606	-1.38214	0.1356	0.93772	-0.35243	-1.27292	-0.52395	-2.22531				62.1	3.12901	1.25187	2.64313	4.93446	5.43037	2.93236	4.36768	3.33678
	62.2	13.479	9.96797	11.9052	11.1624	12.8472	6.9223	12.4395	9.1605	10.5451	10.9993	11.2709	12.6375	12.4254	10.4542	9.15443	9.14853				62.2	-0.53339	0.19053	1.04715	-0.87501	-0.64197	0.17555	-0.33017	-0.43718	-1.0587	-1.24001	0.06095	1.00559	-0.20649	-0.93463	-0.72391	-2.82807				62.2	4.16739	1.70062	2.47613	5.24857	4.88291	3.31835	4.3539	2.53153
	62.3	13.6788	10.0792	11.3929	11.5992	13.1422	7.05797	12.7429	8.79409	10.5391	11.4971	11.2022	12.4961	12.675	10.8814	9.66194	9.22493				62.3	-1.08755	-0.02935	0.78119	-0.73799	-0.2317	0.45493	-0.60682	-0.32575	-1.39381	-1.06477	0.27235	0.45091	-0.15618	-0.23674	-0.75964	-2.70556				62.3	5.03276	3.43002	2.48142	4.22189	4.46152	4.27934	4.00993	1.79797
	62.4	13.9957	10.4522	11.5397	12.3849	12.9085	7.38377	12.781	8.74965	11.0337	11.7913	11.3537	12.1292	12.967	10.9708	10.5022	9.11726				62.4	-1.39422	0.00966	0.63908	-0.80566	0.50684	1.01754	-0.51965	-0.06411	-0.95709	-0.63708	0.65748	-0.42491	-0.20454	0.55544	-0.59034	-1.76107				62.4	5.09023	5.27754	2.9425	3.14964	4.33657	4.97379	3.85274	2.14327
	62.5	14.2965	10.738	11.8582	12.9241	12.3612	7.72384	12.5378	9.21799	11.7302	11.9532	11.287	11.7831	12.6524	10.6165	11.1013	8.94166				62.5	-1.02034	0.27039	0.4542	-0.9066	0.89606	1.726	-0.19177	0.26026	-0.14606	0.0208	0.59498	-0.76856	-0.16169	0.8196	-0.22632	-0.65542				62.5	4.60311	6.00335	4.17993	2.90048	4.27141	4.84472	4.03569	3.52083
	62.6	14.7921	10.9996	11.7826	12.8144	11.9821	8.0459	12.5644	10.1182	12.3941	11.7297	10.9189	11.6823	11.6769	10.4435	11.4415	9.20951				62.6	-0.2123	0.21972	0.09519	-0.7407	0.7408	1.98498	0.07704	0.48153	0.33992	0.33865	0.24089	-0.08998	0.3479	0.24918	0.059	-0.0021				62.6	4.38974	5.44842	5.91287	2.78877	4.3058	4.54281	4.34972	4.88861
	62.7	15.2815	11.3292	11.2292	12.4447	11.8146	8.59512	12.9829	10.853	12.8895	11.2278	10.7433	11.7562	10.3417	10.9222	11.7282	9.90214				62.7	0.45976	-0.18678	-0.23302	-0.27232	0.40892	1.55909	0.1424	0.28708	0.39883	0.10969	0.19342	1.14295	1.31527	-0.62855	0.1429	0.35743				62.7	4.60068	4.2649	7.18733	2.42347	4.57382	4.59888	4.69917	5.20743
	62.8	15.3969	11.1811	10.5214	12.1411	11.2921	9.33704	13.5599	10.8697	12.8637	10.8746	11.3064	11.9797	9.2925	11.5223	11.702	10.5154				62.8	0.45041	-0.50425	-0.18932	0.06846	0.02155	0.91243	-0.09964	-0.14825	0.487	-0.05217	0.44074	1.96448	1.90581	-0.90142	0.33289	0.77207				62.8	4.92341	3.22217	7.27795	2.16286	4.95521	4.7243	5.01618	4.68677
	62.9	15.5177	10.4654	9.94038	11.7976	10.334	9.93544	14.1051	10.5624	12.3729	10.9118	12.1836	12.4393	9.32881	11.3498	11.0501	10.8773				62.9	-0.12368	-0.55242	-0.0317	-0.11809	-0.4858	0.39149	-0.52576	-0.34117	0.97544	0.21919	0.75483	1.89838	1.45806	-0.42196	0.87931	1.05829				62.9	5.10516	2.75132	5.94465	2.27158	5.28511	4.43502	5.30009	4.2811
	63	16.0044	10.1451	9.67648	11.5672	9.61765	10.2836	14.3178	10.6871	11.9929	11.2461	12.6282	12.8618	10.4488	10.4944	10.3883	11.2291				63	-0.53083	-0.61068	-0.24925	-0.44934	-0.95393	-0.18785	-0.68282	-0.264	1.67767	0.65722	1.12276	1.23567	0.39556	-0.02609	1.2861	0.97465				63	4.75357	2.91844	3.91661	2.86383	5.6542	3.82891	5.58221	4.39248
	63.1	16.3098	10.4736	10.0787	11.8063	9.5244	10.2039	13.8418	11.1433	11.8221	11.5015	12.5498	12.7508	11.8976	9.80644	10.4321	11.5173				63.1	-0.42684	-0.83139	-0.51218	-0.25135	-1.20502	-0.77201	-0.44355	-0.10214	2.14101	0.95585	1.34073	0.62989	-0.27961	-0.1195	0.87567	0.73872				63.1	3.91852	3.31259	2.42499	3.90733	6.17527	3.36888	5.65322	4.88746
	63.2	15.7363	10.8057	11.2138	12.3688	10.0129	9.77018	12.7784	11.2333	11.5435	11.6557	12.2702	12.5426	13.0602	9.90668	10.958	11.3346				63.2	-0.00759	-0.86293	-0.40551	0.4596	-1.31599	-1.03317	-0.08965	0.06511	2.10669	0.89486	1.3235	0.48766	-0.13959	-0.20852	-0.12098	0.60526				63.2	3.24269	3.57747	1.74189	5.04209	6.66225	3.3141	5.29002	5.25139
	63.3	14.6586	11.066	12.3312	12.7987	10.7981	9.44544	11.8608	10.8347	11.3068	11.9016	12.4502	12.9205	13.8609	10.6791	11.7062	10.8292				63.3	0.31897	-0.42677	-0.17375	1.0941	-1.29637	-1.04815	0.24932	0.23264	1.44544	0.29517	1.36854	0.68161	0.22637	-0.13491	-0.60231	0.42131				63.3	2.93113	3.8471	1.57378	5.34048	6.60353	3.59506	4.53066	4.74172
	63.4	14.1136	11.4581	12.5883	12.819	11.2435	9.22586	11.7174	10.6182	11.4922	11.8669	13.3847	13.4609	14.4527	11.3783	12.6799	10.5552				63.4	0.19341	0.25094	-0.16277	1.19961	-0.9575	-0.9316	0.63665	0.43122	0.42683	-0.67248	1.5608	0.90289	0.22718	-0.37861	-0.01457	0.27347				63.4	2.48531	4.10505	1.98441	4.34357	5.87743	4.08281	3.69924	3.35138
	63.5	14.5673	11.7616	12.1221	12.2954	11.1727	8.82734	12.2736	11.0795	12.2474	11.1519	14.2928	13.4146	14.7086	11.3818	13.316	10.5325				63.5	-0.30424	0.77232	-0.48736	0.78789	-0.33494	-0.45362	1.01158	0.61404	-0.26616	-1.5244	1.66525	0.97508	0.04429	-1.01856	0.92538	0.58533				63.5	1.83104	4.25396	2.89923	3.06848	5.16219	4.50306	3.20261	2.24327
	63.6	15.375	11.5778	11.4927	11.4697	11.0118	8.41593	12.9419	11.8749	13.1503	10.2689	14.4988	12.6201	14.3174	10.8699	13.1214	10.3159				63.6	-0.67369	1.05383	-0.88848	0.34361	0.2556	0.07052	1.18226	0.76363	-0.20002	-1.77965	1.48071	0.84457	-0.02205	-1.41488	1.4189	1.0359				63.6	1.54066	4.58416	3.81377	2.65331	5.10018	4.42217	3.25451	2.26977
	63.7	15.4834	10.9477	11.0093	10.882	10.9689	8.25434	13.2828	12.2062	13.377	10.0635	14.2896	11.7505	13.4657	10.5251	12.5474	9.89068				63.7	-0.63362	1.14304	-0.88745	0.1813	0.59732	0.01848	1.00497	0.8227	0.32799	-1.32197	0.87783	0.56538	0.0879	-1.33556	1.27789	1.03466				63.7	1.76465	5.06252	4.55243	3.1178	5.34922	3.97792	3.80635	3.02668
	63.8	14.716	10.5919	10.917	10.6448	10.9998	8.20859	13.4279	11.6852	12.7866	10.6058	13.9506	11.6146	12.7306	10.7728	12.1448	9.95042				63.8	-0.37028	0.83129	-0.52956	0.09151	0.72416	-0.30496	0.62461	0.59287	0.6857	-0.48169	0.18044	0.28226	0.34467	-1.17898	0.65028	0.73017				63.8	2.33318	5.08853	5.20206	3.93097	5.03714	3.70441	4.40196	3.77859
	63.9	13.7632	10.8941	11.2141	10.5462	11.2166	8.17672	13.6974	10.8836	12.1237	11.3332	13.2909	11.9889	12.4865	11.4864	12.055	10.6994				63.9	-0.09558	0.07262	-0.27984	-0.09068	0.77322	-0.33527	0.34018	-0.03174	0.66795	0.31874	0.00731	0.06133	0.69066	-0.86723	0.07735	0.59609				63.9	3.2078	4.53282	5.32544	4.71685	3.99565	3.66652	4.52425	4.37133
	64	13.5658	11.4998	11.3584	10.4281	11.7679	8.22006	14.0132	10.5989	11.8765	11.8379	12.3158	12.1588	12.6854	12.1705	12.1451	11.3101				64	0.23481	-0.54823	-0.09713	-0.28	0.83757	-0.2428	0.16555	-0.77264	0.56087	0.95436	0.17131	-0.09815	1.07092	-0.13505	0.08073	0.75619				64	4.05019	3.94326	4.57895	5.00804	2.70478	3.79872	4.11995	4.76619
	64.1	14.5714	12.0809	10.9262	10.3639	12.2309	8.12679	14.0534	10.6888	11.6278	11.9804	11.573	11.9991	12.855	12.3474	12.0583	11.0734				64.1	0.62745	-0.65196	0.37343	-0.42019	0.854	-0.46864	-0.04171	-1.13227	0.52967	1.28076	0.13414	-0.27366	1.48746	0.57877	0.3608	0.85454				64.1	4.24778	3.69366	3.5555	4.72783	1.95076	4.14248	3.64404	4.78588
	64.2	16.0304	12.1787	10.2602	10.8233	11.9568	7.80719	13.5967	10.5016	11.1792	11.5761	11.5007	11.6721	12.7354	12.0134	11.772	10.0729				64.2	0.83762	-0.56059	1.03852	-0.5707	0.62584	-0.87248	-0.31721	-0.88445	0.45029	1.06993	-0.00101	-0.54861	1.73944	0.91998	0.52154	0.52957				64.2	3.95022	3.82155	2.91474	4.36323	2.50088	4.71217	3.42627	4.63079
	64.3	16.6148	11.4786	10.112	11.7433	11.1717	7.54347	12.7637	10.1167	11.1059	10.8816	11.8326	11.3822	12.7156	11.6776	11.5763	9.2156				64.3	0.83726	-0.49597	1.38412	-0.70943	0.16831	-1.06218	-0.56486	-0.22766	0.31314	0.59913	-0.02287	-0.82167	1.41158	1.10412	0.78265	-0.08714				64.3	3.97966	4.10579	2.61065	4.00514	3.9011	5.28912	3.02368	4.39562
	64.4	16.0438	10.5617	10.6265	12.5201	10.7175	7.52249	12.1243	10.0965	11.546	10.5688	11.9822	11.5608	13.0739	11.7461	11.2553	9.24447				64.4	0.81046	-0.26678	1.10495	-0.68013	-0.36809	-1.07555	-0.5368	0.3437	0.35346	0.32564	-0.13809	-0.8447	0.60121	1.26284	1.18115	-0.68079				64.4	4.37687	3.95167	2.54417	3.29901	4.82398	5.41334	2.29894	4.08942
	64.5	15.3753	9.95713	11.0579	12.9704	10.9733	7.79512	11.8827	10.2907	11.9962	10.836	11.9449	12.1693	13.3823	12.0218	10.8766	9.85172				64.5	0.62238	0.30051	0.61762	-0.43259	-0.9671	-1.20591	-0.19273	0.47396	0.55455	0.19184	-0.64104	-0.56523	-0.04207	1.34002	1.35362	-1.20087				64.5	4.57112	3.12559	2.67397	2.41563	4.97801	5.02231	2.13813	4.21412
	64.6	15.4726	9.55181	10.9505	13.3175	11.5395	8.31741	11.5738	10.1052	12.1367	11.2277	12.4296	12.3086	13.2082	12.1996	11.1958	10.4628				64.6	0.19313	0.97017	0.38438	-0.08133	-1.28012	-1.45109	-0.04698	0.29136	0.48903	0.14012	-1.35443	-0.33525	0.05554	1.43333	1.11211	-1.6603				64.6	4.4732	2.50925	2.88	2.12624	5.08944	4.55572	2.82439	4.94699
	64.7	16.0164	9.41767	10.6035	13.6699	11.8397	8.8607	11.0486	9.55948	12.0295	11.2017	13.5278	11.7039	12.737	12.28	12.0528	10.9831				64.7	0.05745	1.37499	0.33579	0.2597	-0.87401	-1.47212	-0.41157	0.28591	0.05363	0.44401	-1.7276	-0.37493	0.66355	1.45618	0.46704	-1.79474				64.7	4.27535	2.7842	3.24305	2.87162	5.36686	4.22858	3.41145	5.70726
	64.8	16.3361	10.0181	10.2592	14.0641	11.7415	9.22628	10.9778	9.09383	11.9329	10.7137	14.2861	11.3329	12.3671	12.3821	12.5008	11.3756				64.8	0.55711	1.63672	0.36328	0.61443	-0.07667	-1.15143	-0.55052	0.56841	-0.27742	0.9082	-1.70581	-0.40591	0.97532	1.08659	-0.35075	-1.30253				64.8	4.1391	3.52508	3.7006	3.97894	5.43105	3.9554	3.34268	5.90726
	64.9	16.3029	11.3284	9.77274	14.2852	11.5192	9.30616	11.9995	8.85531	11.9029	10.3343	14.0785	11.9077	12.372	12.4371	12.2792	11.3561				64.9	1.05148	2.01169	0.42065	0.96351	0.40364	-0.9182	0.19244	0.72498	-0.19325	1.29606	-1.52318	-0.17196	0.87507	0.54533	-0.83777	-0.52756				64.9	4.15003	4.17648	4.25383	4.53832	5.11401	3.71029	3.23914	5.43567
	65	16.0165	12.6286	9.24582	13.9646	11.3823	9.04925	13.4954	8.90999	11.6313	10.4734	13.2615	12.8816	12.6579	12.1256	11.7275	10.9521				65	0.94355	2.1283	0.34149	1.07807	0.3462	-0.98044	1.29522	0.4711	0.02642	1.70086	-0.97838	0.33136	0.82731	0.36008	-0.74717	-0.08576				65	4.20453	4.72269	5.14398	4.60061	4.42335	3.63753	3.62602	4.52656
	65.1	15.6791	13.3251	9.02175	13.4797	11.3066	8.5166	14.3158	9.34003	11.1827	10.7813	12.5329	13.2627	12.6383	11.3116	10.9855	10.7653				65.1	0.56014	1.77198	0.27546	0.82892	0.03396	-0.95047	1.76717	0.02904	0.00354	2.03369	0.09724	0.74936	0.88643	0.43018	-0.53805	-0.01191				65.1	4.07817	5.45006	5.94613	4.45178	3.64761	3.73003	4.18419	3.6386
	65.2	15.4404	13.3016	9.03577	13.2459	11.1372	7.76885	14.3141	9.97967	11.0824	10.8453	12.2553	12.8827	12.1237	10.251	10.3102	11.1304				65.2	0.36295	1.43289	0.42431	0.43536	-0.24157	-0.64681	1.38743	-0.123	0.0025	2.20422	1.18361	0.50243	1.03064	0.21673	-0.81995	0.05356				65.2	3.90573	6.12838	5.99609	3.91998	3.47981	3.54431	4.54902	3.35933
	65.3	15.1913	12.9985	9.22632	12.8941	10.6741	7.13083	13.6376	10.5959	11.3622	10.8733	12.203	12.3435	11.7465	9.45433	10.3261	11.5143				65.3	0.09721	1.38394	0.56241	0.06768	-0.38069	-0.24889	1.0189	0.02638	0.37131	2.08052	1.46628	-0.29813	1.40519	-0.27068	-1.5227	0.27252				65.3	3.8705	5.87872	5.52593	3.1394	4.11862	2.99778	4.60429	3.84537
	65.4	15.0009	13.1435	9.81828	12.3332	10.0723	7.10719	12.4209	11.0312	11.4382	11.1855	12.031	12.2137	11.9853	9.7792	11.1347	11.3569				65.4	-0.66541	1.51254	0.34999	-0.30402	-0.23382	0.00569	1.12197	0.05762	0.63285	1.49383	0.63811	-0.83818	1.52624	-0.49754	-1.88881	0.54054				65.4	3.69329	4.69527	4.96217	2.96546	4.69525	2.70945	4.15598	4.57091
	65.5	14.8398	13.6375	10.5409	11.9465	9.71942	7.61429	11.4925	11.3358	11.239	11.6685	11.6847	12.6927	12.6018	11.4061	12.213	10.7723				65.5	-1.46506	1.63211	-0.36058	-0.47325	0.2702	-0.07858	1.23931	-0.21861	0.29996	0.62355	-0.77111	-0.47885	0.87336	-0.26521	-1.52654	0.69502				65.5	3.50883	3.69738	4.48202	4.09643	4.43935	2.76078	3.51256	4.89344
	65.6	14.1208	13.5947	10.8952	11.904	9.83693	7.94882	11.5287	11.704	11.2508	11.9179	11.4052	13.4922	13.0081	13.1353	13.2774	10.0027				65.6	-1.59532	1.38235	-1.13019	-0.22009	0.74919	-0.43471	1.02476	-0.56798	-0.32562	-0.16331	-1.69638	0.71776	0.15676	0.13512	-0.91189	0.68223				65.6	3.71666	3.62113	4.31265	5.96121	3.98449	2.69979	3.46983	4.7882
	65.7	12.9712	12.7878	10.8021	12.0646	10.5181	7.75413	12.2352	12.0191	11.2819	11.7771	11.4164	13.9113	12.9629	13.8668	14.048	9.33323				65.7	-1.29167	0.5529	-1.25564	0.14635	0.89545	-0.88254	0.46786	-0.68634	-0.71366	-0.48008	-1.5596	1.80564	0.12405	0.53827	-0.56037	0.66112				65.7	3.84969	4.25526	4.41009	6.91877	4.16705	2.78658	4.08046	4.60362
	65.8	12.4012	11.7852	10.1441	12.0922	11.4802	7.3852	12.7581	12.0717	10.922	11.6154	11.7469	13.7315	12.6852	13.6258	13.8528	9.11348				65.8	-1.27851	-0.5047	-0.71106	0.15202	0.71233	-1.33707	-0.32782	-0.58538	-0.76948	-0.24207	-0.72966	1.79539	0.39445	0.96965	-0.40218	0.83125				65.8	3.55168	4.87016	4.44675	6.11516	4.37416	3.32103	4.49277	4.61526
	65.9	12.4316	11.0053	9.01862	12.0048	12.0563	7.14257	12.5637	12.0384	10.4599	11.8106	12.3001	13.5535	12.466	12.9438	12.6381	9.25048				65.9	-1.73746	-1.25266	-0.02413	-0.09507	0.32822	-1.60614	-1.16852	-0.42623	-0.81493	0.21221	0.16188	0.69193	0.47315	1.21676	-0.1634	1.10053				65.9	3.24171	4.90889	4.21299	4.36832	3.91376	3.75943	4.1147	4.8023
	66	12.2789	10.4514	8.30725	12.3494	11.9122	7.06337	12.0926	11.9789	10.2259	11.972	12.8446	13.5695	12.5474	12.3148	11.3833	9.5502				66	-2.1596	-1.50095	0.41462	-0.12862	0.11605	-1.56381	-1.64701	-0.2192	-0.91516	0.71008	0.77609	-0.49597	0.45485	0.99316	0.11156	1.26108				66	3.09011	4.2857	3.59259	3.12708	3.36115	3.48689	3.4486	4.64654
	66.1	12.0228	10.1877	8.67452	13.271	11.4461	7.30806	12.0048	11.7255	10.262	11.621	13.2469	13.2531	12.7633	12.0092	10.8262	10.0837				66.1	-2.00301	-1.3369	0.46302	0.08684	0.33413	-1.31949	-1.39427	0.04912	-0.7629	0.97696	0.96263	-0.73734	0.39895	0.44558	0.24102	1.2528				66.1	3.02493	3.45887	2.93706	3.03718	3.13207	2.52969	3.0847	3.71972
	66.2	12.2038	10.552	9.5446	14.2441	11.3306	7.93296	12.1915	11.2924	10.6196	11.0966	13.4602	12.6092	12.6326	11.9168	10.7824	10.6639				66.2	-1.34274	-0.89307	0.30207	0.28258	0.70075	-1.15082	-0.83151	0.35609	-0.24568	0.61059	0.62784	-0.18834	0.32305	-0.14266	0.27652	1.16379				66.2	3.3017	3.35228	2.8086	3.65704	3.14686	1.58594	2.72749	2.53921
	66.3	12.6429	11.4262	10.1305	14.6749	11.6197	8.84771	12.2888	10.5365	11.1289	11.0263	13.3777	12.2156	12.1669	11.71	10.9689	10.8238				66.3	-0.80829	-0.28345	0.34184	0.2361	0.9836	-1.23065	-0.58828	0.63388	0.11914	-0.10486	-0.02318	0.3385	0.58113	-0.72492	0.29827	1.1				66.3	3.88634	4.16369	2.93686	4.32825	3.53436	1.48633	2.49945	2.14489
	66.4	12.7279	12.1582	10.31	14.452	11.7773	9.8811	12.1709	9.57391	11.5819	11.5096	13.1179	12.178	11.8462	11.4207	11.2607	10.5866				66.4	-0.88503	0.26621	0.55973	-0.28159	1.12603	-1.42969	-0.44368	0.87043	-0.1922	-0.52777	-0.45219	0.59003	1.05197	-1.07188	0.3724	0.88383				66.4	4.18482	4.82042	2.80747	4.80991	3.95337	2.41611	3.11474	2.7592
	66.5	12.4433	12.5934	10.1996	13.9466	11.723	10.558	11.9743	9.22845	11.9186	12.0003	13.0194	12.15	12.0132	11.4833	11.3433	10.5536				66.5	-1.28071	0.34671	0.45259	-0.93405	0.9973	-1.38242	0.00293	1.11572	-0.75786	-0.64876	-0.32909	0.54769	1.04772	-0.95981	0.58489	0.32539				66.5	3.72545	4.24336	2.75873	5.26036	3.6454	3.91392	4.14027	3.47016
	66.6	12.4516	12.962	10.1408	13.5565	11.8161	10.6156	12.1073	9.95913	11.9628	11.7906	13.1462	11.8952	12.5794	11.9315	10.9746	10.9348				66.6	-1.24905	-0.18185	-0.16657	-0.95675	0.75173	-0.79845	0.5105	1.18812	-0.82205	-0.89974	0.09859	0.13399	0.38348	-0.82283	0.64945	-0.27631				66.6	2.85988	2.8361	3.13984	5.74221	2.67058	5.02021	4.33103	3.64817
	66.7	13.1598	13.2086	10.4944	13.3902	11.983	10.2951	12.5078	11.1675	11.9163	10.7675	13.279	11.5726	13.2447	12.2538	10.4089	11.3949				66.7	-0.62264	-0.92454	-0.71365	-0.40031	0.70491	-0.09082	0.74235	0.71541	-0.44731	-1.36752	0.33632	-0.40844	-0.35351	-1.09196	0.13912	-0.59494				66.7	2.59136	2.05775	3.3952	6.00787	2.06713	5.10537	3.77455	3.69789
	66.8	14.2864	13.2447	11.0736	13.4239	11.7931	10.008	12.7202	11.954	12.0286	9.38272	13.3154	11.5592	13.6084	12.1302	10.065	11.8621				66.8	-0.09608	-1.41424	-0.60112	-0.03232	0.94618	0.00882	0.74141	-0.23317	-0.14546	-1.77119	0.30706	-0.76978	-0.61246	-1.42584	-0.65696	-0.81396				66.8	3.15255	2.64758	2.99571	5.75486	2.31913	4.79337	3.58182	4.23815
	66.9	15.1557	13.1317	11.3695	13.61	11.1296	9.93267	12.4846	11.8979	12.0347	8.42823	13.3954	11.7422	13.4238	11.7192	10.1734	12.3778				66.9	-0.2053	-1.3143	0.08914	-0.17226	1.26987	-0.41317	0.69591	-0.87932	-0.012	-1.94263	0.29473	-0.89747	-0.41739	-1.4505	-1.07051	-1.05706				66.9	3.82728	4.21953	2.42625	5.05186	2.71128	4.99235	3.85873	5.13999
	67	15.0342	13.0241	11.1782	13.6171	10.2026	9.88871	11.692	11.3184	11.9627	8.39079	13.7621	11.8147	13.0476	11.2998	10.7847	12.4098				67	-0.66052	-0.49796	0.68818	-0.55003	1.33973	-0.80486	0.72227	-0.6919	0.06496	-1.89388	0.11648	-0.61318	-0.12612	-1.26821	-0.91182	-0.94595				67	4.05302	5.80739	2.50389	4.46217	2.909	5.55712	3.84867	5.58823
	67.1	13.8121	13.0031	10.7378	13.2083	9.12681	9.89599	10.786	11.1049	12.0661	8.83516	14.325	12.06	12.9095	11.1099	11.459	11.5022				67.1	-1.06647	0.66682	0.55986	-0.95362	1.2252	-1.0316	0.80921	-0.09337	0.11785	-1.68443	-0.52528	0.13677	0.06059	-1.01359	-0.24819	-0.36318				67.1	3.61131	6.37866	3.18564	4.12834	3.45846	5.91877	3.60241	5.07547
	67.2	12.5276	12.8904	10.33	12.5521	8.23686	9.96964	10.6667	11.6456	12.0935	9.15728	14.6077	12.7097	12.8808	11.1686	11.6599	10.2833				67.2	-1.11544	1.58651	-0.21981	-1.34827	1.29194	-1.01268	0.79731	0.27459	0.35562	-1.53364	-1.1079	0.82949	0.1729	-0.70003	0.58196	0.18389				67.2	2.69859	5.90444	3.80722	3.65911	4.29645	5.72106	3.81942	4.19098
	67.3	12.2237	12.4567	10.1575	11.8657	8.17674	9.85566	11.3617	12.2085	11.799	9.26008	14.529	13.3468	12.888	11.2617	11.6447	9.77399				67.3	-0.6575	1.87082	-0.85858	-1.54005	1.53438	-0.44848	0.53776	0.09422	0.81864	-1.60109	-0.97849	0.97825	0.30424	-0.3136	0.89891	0.52375				67.3	2.10441	5.08146	4.09935	3.06327	4.74924	4.83035	4.31028	3.87672
	67.4	12.6832	11.8843	10.1845	11.3753	9.04421	9.51802	12.0852	12.2579	11.5532	9.43038	14.3408	13.372	12.9498	11.5066	12.0325	10.1639				67.4	-0.26546	1.6087	-0.68675	-1.18532	1.62502	0.64233	0.0397	-0.41667	1.00573	-1.83138	-0.39163	0.65714	0.45599	0.24238	0.45605	0.99326				67.4	2.35152	4.26503	4.14969	2.71532	4.66638	3.70299	4.37592	4.10285
	67.5	13.0249	11.6023	10.13	11.1826	10.1441	9.18163	12.5575	11.9265	11.7149	9.84549	13.9566	12.5745	12.7812	12.1073	12.6448	11.0435				67.5	-0.42134	1.11874	0.09529	-0.31948	1.24224	1.78675	-0.39449	-0.67939	0.59925	-2.11788	0.02814	0.26609	0.47967	0.80982	-0.34869	1.52993				67.5	3.02806	3.62871	4.03845	2.71788	4.36843	2.94325	3.87893	4.28825
	67.6	13.1115	11.4266	10.0544	11.1817	10.8457	8.88562	12.8642	11.3714	12.0878	10.132	13.222	11.5163	12.434	12.6997	12.8223	11.872				67.6	-0.67187	0.36083	0.4954	0.43664	0.47699	2.56106	-0.33869	-0.39029	-0.18767	-2.03892	0.11322	-0.01023	0.22549	0.98699	-1.07448	1.8151				67.6	3.33342	3.27125	3.93415	2.92073	3.95121	2.76062	3.32725	4.50554
	67.7	13.4463	10.8664	10.409	11.422	11.0178	8.56667	12.8224	11.0049	12.3585	10.0023	12.5773	10.8926	12.2011	12.7509	12.5713	12.3352				67.7	-0.50432	-0.70724	-0.10634	0.46165	-0.06801	2.65162	0.19269	0.275	-1.04581	-1.168	0.02457	-0.36266	-0.10175	0.84378	-1.54113	1.81878				67.7	3.23247	2.95026	3.93921	3.29145	3.45114	3.0345	3.32028	4.89817
	67.8	14.0408	9.94544	11.2054	11.92	10.7034	8.26371	12.3667	11.2656	12.4884	9.99032	12.4668	10.9479	12.1714	12.3522	12.0605	12.6926				67.8	0.1451	-1.58364	-1.00683	-0.14861	-0.00142	2.02158	0.68618	0.81642	-1.60043	0.19415	0.00634	-0.83625	0.00356	0.62445	-1.74854	1.65748				67.8	3.18586	2.71626	3.92819	3.66786	3.33228	3.29619	3.81755	5.22973
	67.9	14.5114	8.98992	11.805	12.4954	10.1357	8.00731	11.6385	11.7979	12.6455	10.4356	12.4048	11.5256	12.4803	11.849	11.078	12.9264				67.9	1.01935	-1.81617	-1.26703	-0.53706	0.30419	1.14756	0.81206	0.92596	-1.47706	1.23449	0.0943	-1.15481	0.52305	0.29274	-1.84838	1.41233				67.9	3.07534	2.77365	3.75013	3.7888	4.03443	3.31998	4.10699	5.74781
	68	14.8003	8.37769	11.9209	12.8881	9.67792	7.86187	11.0374	11.8565	12.9375	10.705	11.8311	12.0777	13.0571	11.3828	9.85953	12.5154				68	1.50774	-1.45145	-0.88357	0.000377434	0.19541	0.56483	0.6724	0.85369	-0.82136	1.4163	-0.03385	-1.13808	0.81519	0.02537	-1.9369	1.12284				68	2.63396	2.90171	3.3037	3.87193	5.13877	3.3962	3.60883	6.58749
	68.1	14.9461	8.60939	11.661	12.7616	9.37009	7.9249	11.2817	11.505	13.0799	10.4615	11.2997	12.3158	13.4788	11.4682	9.13299	11.7462				68.1	1.27345	-0.77708	-0.38664	1.01497	-0.3416	0.44064	0.65375	0.88638	-0.21408	0.88975	-0.25319	-0.92357	0.42172	0.08461	-1.72442	0.6528				68.1	2.05416	2.92927	2.76238	4.19793	5.57759	3.64188	2.65754	6.96841
	68.2	14.8919	9.52061	11.1323	12.4722	9.20775	8.21483	12.3982	11.3293	12.6188	10.3204	11.6592	12.524	13.4378	12.3756	9.12733	11.5201				68.2	0.62102	-0.30492	-0.15917	1.61647	-0.51412	0.45996	0.84666	0.98653	0.01339	0.23025	-0.13308	-0.69906	-0.33167	0.17134	-1.0329	-0.17337				68.2	1.79147	3.17965	2.60061	4.43126	5.0171	3.95702	2.23184	6.35259
	68.3	14.8941	10.1955	10.6435	12.888	9.46413	8.7595	13.3412	11.3031	11.4534	10.7043	12.5584	12.8048	12.969	13.1126	9.57344	11.7817				68.3	-0.07659	-0.42984	-0.23278	1.69654	-0.03049	0.15943	0.88834	0.95315	-0.08895	-0.05394	0.16889	-0.47107	-0.68946	-0.11839	-0.31245	-0.95212				68.3	2.08795	3.73348	3.04852	4.13519	4.50354	4.56455	2.52722	5.37707
	68.4	15.2214	10.2035	10.4964	13.9405	9.90293	9.3421	13.4133	11.1603	10.3104	11.1693	13.119	12.9989	12.3964	12.6989	10.2695	11.8685				68.4	-0.79169	-0.69036	-0.43287	1.4599	0.30158	-0.43963	0.75354	0.52615	-0.25247	0.26791	0.34377	-0.11738	-0.43305	-0.56241	0.11659	-0.97578				68.4	2.60969	3.97288	3.71359	3.43541	4.81435	5.36318	2.81838	4.82126
	68.5	15.2955	9.92653	10.5496	14.7473	10.0318	9.44086	13.2322	11.1601	10.1479	11.063	13.1388	13.0222	12.2328	11.589	10.923	12.0072				68.5	-1.48063	-0.3627	-0.62523	0.82871	0.02626	-0.93036	0.80559	-0.30257	-0.19003	0.81194	0.38714	0.33639	0.15703	-0.68812	0.64446	-0.26827				68.5	2.98824	3.82666	4.19962	2.97104	5.37575	5.42591	3.02017	4.53804
	68.6	14.4792	10.0064	10.4792	14.6628	10.1362	8.97683	13.4332	11.4315	10.9121	10.2796	12.8759	12.7668	12.7212	10.8794	11.1995	12.6077				68.6	-1.62234	0.44076	-0.67707	-0.06934	-0.11765	-1.06774	0.91058	-1.08966	0.02998	0.8805	0.15377	0.56204	0.76801	-0.36352	1.51852	0.48293				68.6	3.12172	3.89576	4.46128	3.31785	5.5894	4.58746	3.52287	4.06569
	68.7	13.318	10.7131	10.4631	13.7484	10.5848	8.45689	13.4364	11.5274	11.7457	9.26878	12.9416	12.4252	13.2861	11.0996	11.3391	13.2791				68.7	-1.00403	0.80268	-0.5495	-0.75697	0.52462	-0.93921	0.56463	-1.36049	0.01188	0.51584	-0.39659	0.13208	1.11505	0.0799	2.21715	0.95085				68.7	2.98557	4.20961	4.63086	4.05223	5.38047	4.06131	4.09671	3.39657
	68.8	12.7671	11.4035	10.7969	12.6419	11.1288	8.41154	12.9002	11.318	12.2134	8.62555	13.6639	12.6032	13.0304	11.8216	11.6189	13.4668				68.8	-0.33047	0.26087	-0.30776	-0.86822	1.47533	-0.80032	0.03514	-0.93076	-0.27505	0.26477	-0.6284	-0.78415	1.29898	0.2662	2.31971	1.15991				68.8	2.87129	4.55869	4.99187	3.97218	4.70003	4.3992	4.2879	2.93277
	68.9	13.1471	11.4257	10.9785	11.8799	11.3117	8.79446	12.5084	11.1116	12.4426	8.54643	14.2645	13.4672	11.9557	12.2393	11.6083	12.9913				68.9	-0.06249	-0.55092	0.03435	-0.56341	1.91677	-0.88987	0.04401	0.02306	-0.4316	0.29593	-0.08759	-1.33565	1.57893	0.27188	1.9888	1.23942				68.9	2.99001	5.20361	5.43823	2.9789	3.91653	4.77253	4.03604	3.08299
	69	14.0778	11.0788	10.6602	11.2986	11.0962	9.16864	12.5946	10.8775	12.3542	8.81411	14.1189	14.4865	11.0497	12.1523	11.1453	12.0264				69	0.14918	-0.90893	0.39696	-0.43452	1.81294	-1.11283	0.5533	1.00066	-0.27868	0.48686	0.60473	-1.20746	1.70849	0.23888	1.54796	1.4697				69	3.15707	5.96793	5.64388	2.42913	3.75548	4.51755	3.67381	3.71084
	69.1	14.7138	11.125	10.6014	10.6362	10.8165	9.50427	12.7606	10.602	11.8929	9.12091	13.6245	15.1334	10.8605	12.0671	10.6828	11.1775				69.1	0.43959	-0.90245	0.76633	-0.74463	1.75792	-1.14037	0.80806	1.43245	-0.04062	0.53506	0.70357	-0.73476	1.42869	-0.00172	1.35089	1.57769				69.1	3.4419	6.03784	5.37209	3.07597	4.357	3.78525	3.7281	4.37008
	69.2	14.7861	11.8703	11.1974	10.4015	10.5646	9.85616	12.824	10.7173	11.3717	9.25693	13.2264	15.0936	10.9898	12.2548	10.455	10.9169				69.2	0.43101	-1.10743	0.97856	-1.25065	1.96408	-0.69114	0.65631	1.16562	-0.02266	0.27909	0.5051	-0.30415	0.86607	-0.62752	1.51499	1.10306				69.2	3.77438	5.17586	4.5043	4.02616	5.20009	2.95943	4.19843	4.55177
	69.3	14.76	12.692	11.7862	10.9853	10.1488	9.90476	12.9666	11.3817	10.9802	9.33914	12.845	14.3012	11.1422	12.4211	10.4001	10.8869				69.3	-0.11442	-1.45551	0.70673	-1.5638	1.96425	0.0204	0.69124	0.88256	-0.28592	0.03757	0.60946	-0.35151	0.40023	-1.37648	1.56215	0.6645				69.3	3.52484	3.90261	3.5685	4.15412	5.85835	2.3941	4.42375	3.8428
	69.4	14.6611	12.9985	11.8958	12.0735	9.65431	9.72252	12.9916	12.3354	10.789	9.54351	12.6357	12.9829	11.4483	12.4336	10.3159	10.5773				69.4	-0.93947	-1.29816	0.24082	-1.44249	1.49636	0.23787	0.93542	1.16	-0.76895	-0.13098	0.85236	-0.92209	0.29441	-1.53417	0.82747	0.90516				69.4	2.80788	2.90364	3.11674	3.52978	6.03814	2.24134	4.17525	2.72166
	69.5	14.1754	12.9473	11.6069	13.2238	9.24086	9.67278	12.3381	13.0975	10.9055	9.61273	13.0216	11.7161	12.0976	12.6125	9.90193	10.151				69.5	-1.37032	-0.73426	0.15255	-0.96425	0.77754	-0.08426	0.97377	1.47144	-1.24282	-0.27438	0.83413	-1.46196	0.32757	-0.66563	-0.56658	1.19655				69.5	2.2326	2.66367	2.94206	2.95561	5.43162	2.40985	4.09623	2.2464
	69.6	13.598	12.9163	11.1875	13.7306	8.78035	9.9383	11.3246	13.1229	11.1836	9.30158	13.7153	11.1175	12.966	13.0465	9.24067	10.106				69.6	-1.09506	-0.33217	0.34321	-0.35381	0.04314	-0.07007	0.8333	1.37257	-1.24967	0.02825	0.60494	-1.47005	0.32054	0.56795	-1.4023	0.87686				69.6	1.7391	3.1031	3.00861	2.5404	4.45603	2.8549	4.33193	2.75027
	69.7	13.5521	12.9343	10.9391	12.9806	8.35997	10.4732	11.1562	12.5224	11.4964	8.89671	13.8612	11.4479	13.4127	13.3155	8.74643	10.6029				69.7	-0.63828	-0.17837	0.26846	-0.01541	-0.47048	0.42078	0.73775	1.32438	-0.58089	0.83076	0.45135	-0.99981	0.43684	1.08254	-0.82296	0.23125				69.7	1.46834	3.7237	3.7306	2.15647	4.30447	3.54111	4.32091	3.57226
	69.8	14.0936	12.7921	11.0621	11.4435	8.4578	10.9041	11.9897	11.9043	11.8455	8.75184	13.098	12.4604	13.1095	13.1968	8.89609	11.4536				69.8	-0.47589	-0.20755	-0.34377	-0.29751	-0.73841	0.65748	0.60583	1.63146	0.4107	1.40217	0.55064	-0.48683	0.54408	0.79452	0.4242	-0.13436				69.8	2.08105	4.31392	4.78956	2.28996	5.33774	4.27755	3.97079	3.95644
	69.9	14.7186	12.3107	11.5555	10.2465	9.13215	10.7812	12.7761	11.5284	12.0859	8.7606	12.0721	13.282	12.3516	12.839	9.85008	12.4434				69.9	-0.47873	-0.43595	-1.19122	-0.89518	-1.07815	0.33285	0.3368	2.01303	1.14791	1.16371	0.91757	-0.23212	0.27138	0.44227	1.08213	-0.16739				69.9	3.44183	4.77945	5.17138	3.06563	6.45338	4.68263	3.63506	3.61707
	70	14.899	11.7112	11.9217	9.84842	9.63456	10.0436	12.9587	11.3821	12.0167	8.7324	11.7425	13.2776	11.4041	12.5895	11.0573	13.0898				70	-0.47453	-0.7787	-1.55927	-1.01237	-1.50375	-0.18995	0.11828	2.06624	1.33325	0.56829	1.42199	-0.10177	-0.45107	0.44351	0.8588	-0.35501				70	4.39034	4.87332	4.62729	3.64672	6.63954	4.4111	3.68754	2.79196
	70.1	14.3098	11.461	11.5583	9.98126	9.42179	9.13749	12.8237	11.3352	11.814	8.83448	12.1113	13.0879	10.7308	12.7356	11.921	12.8437				70.1	-0.40902	-1.02373	-1.11062	-0.3416	-1.62808	-0.51132	0.09079	1.59504	0.89174	0.25792	1.7185	0.0564	-1.13937	0.62288	0.1148	-0.76691				70.1	4.04924	4.57111	3.7073	3.30155	5.84777	3.71798	4.29645	2.20175
	70.2	13.2193	11.4631	10.71	10.3733	9.13847	8.39582	12.5714	11.2334	11.96	9.25392	12.6989	13.3257	10.8702	13.0586	12.2064	11.9177				70.2	-0.27745	-0.89982	-0.19879	0.45717	-1.1445	-0.39284	0.20914	0.87628	0.0297	0.03893	1.47505	-0.03195	-1.28979	0.73871	-0.96117	-0.92947				70.2	3.03401	4.17272	2.76437	2.58716	4.62278	3.18347	4.89295	2.35281
	70.3	12.5349	11.4162	10.2563	10.9192	9.6503	7.7386	12.1608	11.1248	12.3354	9.88862	13.3553	13.4806	11.7363	13.2935	11.8364	11.098				70.3	-0.14049	-0.41276	0.78526	0.57282	-0.22698	0.2597	0.41151	0.51781	-0.60405	-0.34132	0.81938	-0.53436	-1.08576	0.65935	-1.81448	-0.81686				70.3	2.73579	3.90105	2.221	2.38788	3.4817	2.9703	4.69657	2.97917
	70.4	12.7635	11.4572	10.4833	11.4782	10.591	7.40034	11.7961	11.1635	12.4906	10.4756	13.7258	13.2305	12.6614	13.1535	11.2481	10.8145				70.4	-0.05221	0.16115	1.81621	0.11685	0.54294	1.16942	0.42346	0.60947	-0.47621	-0.58339	0.16123	-1.0288	-0.84069	0.27619	-1.7321	-0.68656				70.4	3.41218	3.61888	2.54151	2.7435	2.59679	3.25932	3.87074	3.55881
	70.5	13.6413	11.8626	10.708	11.8208	11.1079	7.97157	11.7348	11.4203	12.4945	10.7304	13.542	13.024	12.6949	12.3999	11.0463	10.9642				70.5	-0.09864	0.63553	2.67839	-0.172	0.75341	1.71578	0.10839	0.82048	0.19484	-0.55807	-0.433	-1.03135	-0.51121	-0.14169	-1.19828	-0.3842				70.5	4.18251	3.24108	3.56779	3.49507	2.0551	4.1515	3.1783	3.95523
	70.6	14.7021	12.5437	10.3934	11.7452	11.1953	9.10564	11.9756	11.7816	12.4861	10.6218	13.2126	13.0578	11.566	11.376	11.1198	11.1436				70.6	-0.31866	0.99586	2.84849	-0.10564	0.33764	1.38019	-0.15291	1.1584	0.77433	-0.44643	-1.01804	-0.71159	-0.10513	-0.08783	-1.03789	0.20004				70.6	4.39604	2.95556	4.65661	4.6105	1.90651	5.08266	3.03073	4.20767
	70.7	15.3035	12.9703	9.87261	11.2668	11.5183	9.77439	12.2475	12.0164	12.3468	10.4898	13.0578	13.0138	10.2519	10.6989	11.0425	10.8373				70.7	-0.47435	1.32253	2.14134	0.11761	-0.38301	0.40542	-0.24034	1.62043	1.11307	-0.45324	-1.11924	-0.58194	0.1955	0.35287	-1.15596	0.8015				70.7	4.36823	3.05374	5.24066	5.67984	2.14795	5.41082	3.17493	4.35582
	70.8	15.1116	12.782	9.96072	10.7732	12.319	9.82195	12.2744	12.0475	11.9381	10.5982	12.9317	12.8602	9.85672	10.6703	11.0174	10.0173				70.8	-0.30304	1.6073	1.05737	0.39101	-0.593	-0.27008	-0.3459	2.0502	1.44736	-0.80967	-0.42523	-0.71006	0.24392	0.64594	-1.2665	1.11936				70.8	4.62723	3.54852	5.38533	5.95249	2.69575	5.13184	3.16807	4.15283
	70.9	14.6356	12.3521	11.0267	10.7294	12.9391	9.91302	12.1398	11.8253	11.2831	10.6962	12.7851	12.9665	10.5829	11.1379	11.6099	9.55403				70.9	-0.1404	1.60578	0.39724	0.48258	-0.00807	-0.16269	-0.23188	2.24913	1.55811	-1.34123	0.27649	-0.70874	0.10624	0.54954	-1.25907	1.10721				70.9	4.67614	4.07616	5.43325	5.48601	3.1363	4.71923	3.05313	3.44529
	71	14.365	12.3705	12.137	11.1447	12.6331	10.1784	12.0192	11.3638	10.7358	10.4269	12.8405	13.2468	11.698	11.4626	12.4702	9.99527				71	-0.42265	1.13014	0.40923	0.31743	0.56425	0.30009	0.21996	1.88523	0.93905	-1.32296	0.38013	-0.38866	0.13345	0.3048	-1.06542	1.07357				71	3.84031	4.30065	5.3215	5.15439	3.15991	4.68014	3.24856	2.72577
	71.1	14.1616	12.9021	12.2209	11.7361	11.7087	10.1183	11.9374	10.9564	10.6826	10.1079	13.0977	13.3558	12.4112	11.2799	12.5376	10.6251				71.1	-0.91949	0.52879	0.53603	-0.02414	0.40441	0.51697	0.38328	1.04327	-0.18672	-0.52211	0.49425	-0.01841	0.5566	0.36699	-0.77896	1.16203				71.1	2.60693	4.10032	4.74831	5.22018	2.9947	5.0594	3.88448	2.35484
	71.2	13.8871	13.4345	11.5246	12.3398	11.2292	9.59655	11.9364	10.5762	11.0159	10.2683	13.3769	13.2981	12.7872	11.1523	11.7965	10.8973				71.2	-1.12773	0.29093	0.26156	-0.56519	-0.28106	0.32206	-0.18052	0.38985	-1.02648	0.31719	0.90601	0.12988	1.10724	0.85562	-0.44985	0.92216				71.2	1.83811	3.78874	4.01687	5.25443	2.74812	5.29912	4.58411	2.07254
	71.3	13.4046	13.5104	10.7512	12.8964	11.2208	9.02315	11.9557	10.0892	11.2535	10.6092	13.5858	13.1925	13.1634	11.5647	11.1981	11.035				71.3	-0.88159	0.13956	-0.2561	-1.15273	-0.73465	0.01572	-1.00334	0.24402	-1.27137	0.48801	0.97554	0.0825	1.43557	1.35775	0.02883	0.1947				71.3	1.82475	3.77868	3.79464	4.99647	2.32827	4.99765	5.04061	1.82214
	71.4	12.5427	13.068	10.0765	13.269	10.8645	8.83274	12.0312	10.0314	11.2766	10.4254	13.59	13.1833	13.2203	11.9698	11.1128	11.1451				71.4	-0.44285	-0.2909	-0.66492	-1.49476	-0.54712	0.0184	-1.4071	0.22863	-1.20766	0.16072	0.62395	-0.000108536	1.45444	1.42835	0.49314	-0.40573				71.4	2.34033	3.9716	3.97757	4.28278	2.19158	4.32487	5.35083	1.87296
	71.5	11.9212	12.5654	9.44404	13.2608	10.2028	9.41658	12.2301	10.6937	11.4037	9.69378	13.5283	13.3647	12.6452	11.7764	11.2756	11.008				71.5	-0.25795	-0.43043	-0.72019	-1.38132	-0.1541	0.24635	-1.26536	0.1347	-1.06436	-0.07022	0.57468	0.0564	1.18954	1.02357	0.71161	-0.47699				71.5	2.7644	3.84085	3.99918	3.19892	2.98008	3.67933	5.32328	2.23327
	71.6	12.2595	12.4146	8.75671	12.9676	9.96961	10.6644	12.4014	11.3231	11.7215	9.17311	13.6715	13.6366	11.8248	11.2453	11.2268	10.4833				71.6	-0.4141	0.20471	-0.35822	-0.78787	-0.0767	0.2768	-0.90511	0.26934	-0.84755	0.09817	1.11455	0.294	0.72392	0.58277	0.62112	-0.40572				71.6	2.75545	3.16732	3.82167	2.57293	4.15248	3.41227	4.42136	2.86265
	71.7	13.2749	12.7171	8.24495	12.534	10.5125	11.7038	12.5017	11.3198	12.1238	9.47309	14.047	13.7439	11.258	10.9325	10.6338	10.0264				71.7	-0.62955	0.92493	0.16618	-0.06817	-0.14899	0.24457	-0.64887	0.50553	-0.59089	0.38808	1.85606	0.57741	0.27951	0.51281	-0.0192	-0.5968				71.7	2.49761	2.50803	3.84228	3.19843	4.29686	3.76867	3.03179	3.64457
	71.8	14.3052	13.2938	8.64389	12.1404	11.3423	11.7536	12.5432	10.9829	12.4489	10.0686	14.7747	13.5841	11.0345	11.0959	9.90977	10.2473				71.8	-0.77353	0.89456	0.43476	0.36055	-0.3003	0.39758	-0.58482	0.27428	-0.12839	0.28262	2.28414	0.77204	0.1149	0.5655	-0.94882	-0.88615				71.8	2.07889	2.62795	4.23905	4.5534	3.21275	4.46323	2.35667	4.20403
	71.9	14.7624	13.6637	10.0662	12.1438	11.627	10.8445	12.3146	10.8429	12.2848	10.1722	15.5649	13.4006	10.934	11.5759	9.53656	10.8776				71.9	-0.96423	0.2805	0.23501	0.32507	-0.79538	0.48437	-0.64162	-0.26254	0.7849	-0.1443	2.1325	0.88938	0.26421	0.45539	-1.26294	-0.87178				71.9	1.94907	3.42099	4.6987	5.2913	2.09817	4.72395	2.5342	4.64033
	72	14.1839	13.4438	11.2646	12.5326	11.2643	9.69384	11.7421	11.1172	11.4727	9.93614	15.4834	13.3923	10.7729	12.1208	9.38513	11.3506				72	-1.26338	-0.2975	-0.20535	-0.08665	-1.40561	0.40908	-0.66436	-0.48481	1.88354	-0.2239	1.46762	0.78088	0.51566	0.53834	-0.78809	-0.41059				72	2.80264	3.88214	4.92109	4.96198	1.84662	4.3685	2.71423	5.36307
	72.1	13.0713	12.6914	11.084	13.0488	10.8408	9.06644	11.2641	11.6695	10.7654	9.62188	14.3874	13.5461	10.8209	12.5664	9.50972	11.6864				72.1	-1.2885	-0.65746	-0.43965	-0.43368	-1.63638	0.24866	-0.52188	-0.06626	2.3869	0.35981	0.55556	0.24224	0.57821	1.01419	-0.2907	0.0668				72.1	4.20194	3.69209	4.8469	4.25386	2.20024	3.96402	2.64758	5.84826
	72.2	12.693	11.9228	9.85367	13.5041	10.5644	8.82851	11.4177	12.1894	10.9476	9.25364	13.1516	13.6659	11.3035	12.7785	10.1792	11.9648				72.2	-0.46863	-0.88069	-0.33058	-0.38934	-1.41981	-0.24778	-0.31553	1.0543	1.68111	1.03701	-0.28687	-0.36284	0.50022	1.61815	-0.35063	-0.02348				72.2	5.04016	3.77417	4.412	3.80735	2.59275	3.68231	2.65786	5.42077
	72.3	13.2363	11.5181	8.76901	13.8735	10.3215	8.3144	12.1407	12.4228	11.6129	9.26938	12.3133	13.538	12.0607	12.8712	11.1287	12.0519				72.3	0.94783	-0.90251	-0.000389975	-0.11859	-1.06939	-0.98832	-0.31075	2.18836	0.15498	1.12478	-0.75725	-0.53156	0.59593	1.87201	-0.81912	-0.66228				72.3	5.08367	4.43065	3.73635	3.41619	3.0133	3.2663	2.89774	4.62514
	72.4	13.5754	11.4326	8.52631	14.1208	10.3323	7.57095	12.8654	12.2607	11.8864	9.88515	11.8252	13.2365	13.0935	13.2034	11.701	12.1027				72.4	1.83116	-0.74781	0.46987	0.27346	-0.89416	-1.27779	-0.57128	2.14525	-1.07151	0.74095	-0.66251	-0.42185	0.63057	1.25316	-1.05923	-1.1469				72.4	4.71655	4.83386	3.22903	2.76862	3.59754	2.92618	3.13856	4.26549
	72.5	13.1716	11.4159	9.0166	14.0297	10.959	6.99527	13.1632	11.8085	11.674	10.3365	11.6584	12.9788	14.1732	13.4904	11.6245	12.2152				72.5	1.48255	-0.73093	0.91368	0.73105	-0.89295	-0.78566	-0.93363	0.9835	-1.29785	0.46682	-0.14775	-0.35747	0.12768	0.11227	-0.78003	-1.05481				72.5	4.20664	4.52103	3.11862	2.5589	4.02231	2.98129	3.18923	4.38334
	72.6	12.559	11.1572	9.73036	13.7083	11.9301	6.8858	12.9614	11.2827	11.4301	10.016	12.0778	12.9805	14.3877	13.1284	11.1924	12.282				72.6	0.31891	-0.80502	1.08064	0.89054	-0.84872	0.05318	-1.42623	-0.05951	-0.7137	0.44234	0.40883	-0.15051	-0.41423	-0.43189	-0.26841	-0.71057				72.6	3.68292	4.04673	3.41894	3.39676	3.99796	3.41569	3.28115	4.70851
	72.7	12.3069	10.8698	10.1751	13.6085	12.4409	7.73808	12.4268	10.9129	11.35	9.53667	13.1258	13.1133	13.4575	12.303	10.6818	12.4054				72.7	-0.68062	-0.49594	1.13391	0.4804	-0.81983	0.54992	-2.04245	-0.33404	-0.02642	0.50571	0.70204	0.4461	-0.30272	-0.00728	0.10863	-0.49318				72.7	3.46935	4.11395	4.1503	4.25812	3.73929	4.25837	3.7209	5.24974
	72.8	12.75	11.2378	10.2459	13.8057	12.4611	9.41813	11.8192	11.1456	11.3573	9.39979	13.8553	12.9533	12.5544	11.5718	10.2764	12.5016				72.8	-0.89855	0.1336	1.55079	-0.29876	-0.8788	0.64131	-2.08974	-0.09908	0.05505	0.46521	0.65612	0.94181	-0.07118	0.6432	0.24809	-0.42568				72.8	3.95581	4.28955	4.94114	4.02722	3.58572	5.10145	4.55516	5.73895
	72.9	14.0212	12.276	10.1397	13.8218	12.5843	10.6692	11.2402	12.0649	11.3508	9.20599	13.4467	12.6312	12.4922	11.0707	10.3369	12.1482				72.9	-0.59966	0.63972	2.21973	-0.8667	-0.72415	0.78987	-1.16922	0.3113	-0.37592	-0.01816	0.38659	0.70704	-0.19779	0.78322	0.28391	-0.26738				72.9	4.62614	3.67671	5.09759	3.27397	3.45741	5.12485	5.42357	5.39669
	73	15.4988	13.2041	9.77202	13.1672	12.6194	10.674	10.7846	12.7235	11.274	8.97324	12.2818	12.4971	12.6323	10.7568	10.7782	11.132				73	-0.40492	0.91952	2.52363	-0.89631	-0.2089	0.92377	0.01942	0.60128	-0.55103	-0.96237	0.08343	0.04735	-0.25388	0.32651	0.29495	0.18067				73	4.85661	2.93509	4.59611	3.09089	3.36442	4.47406	5.79075	4.2362
	73.1	16.1892	13.4598	9.10904	12.1169	12.1507	10.0295	10.7935	12.1498	11.3716	9.27455	11.2624	12.2846	12.5479	10.8206	11.1464	9.92339				73.1	-0.36255	0.86433	2.32255	-0.6543	0.3763	0.80706	0.70317	0.67122	-0.27602	-1.77925	0.000176755	-0.32433	-0.117	-0.23431	0.22077	0.53199				73.1	4.8437	3.27178	4.04572	3.4673	3.60937	4.10406	5.59143	3.28663
	73.2	15.6224	13.1594	8.68925	11.5257	11.6342	9.508	11.3739	10.8754	11.7103	9.84759	10.916	12.0636	12.6476	11.2675	11.3616	9.45941				73.2	-0.17568	0.24552	1.85572	-0.42444	0.60501	0.91937	0.77102	0.76511	0.03673	-1.82589	0.11439	-0.32071	-0.04881	-0.538	-0.07578	0.38271				73.2	4.66098	4.0496	3.57942	3.67953	3.91658	4.41797	5.05206	3.25397
	73.3	14.1569	12.6469	8.77478	11.5594	11.4283	9.14917	12.1472	10.3126	11.9771	9.97991	11.3047	12.4334	12.9766	11.5934	11.463	10.1541				73.3	-0.01884	-0.38169	1.21334	-0.26287	0.27791	1.40521	0.51498	0.80755	0.33432	-1.25355	0.13656	-0.18611	-0.06191	-0.73041	-0.69256	0.23862				73.3	4.08383	3.95869	3.14457	3.62984	3.86155	4.8751	4.3649	3.8623
	73.4	12.8636	12.0508	9.06324	11.6146	11.0762	8.61987	12.5633	10.7804	12.3167	9.75684	12.0165	13.0693	13.0045	11.5979	11.2485	11.4982				73.4	-0.28785	-0.16685	0.64715	-0.27047	-0.20847	1.50937	0.35403	0.38125	0.72416	-0.91997	0.18121	0.03635	-0.03516	-0.76006	-1.23317	0.53661				73.4	3.28624	3.13831	3.22301	4.00415	3.66286	4.71442	3.90432	4.37518
	73.5	12.4906	11.5565	9.37301	11.4789	10.5802	7.86761	12.3428	11.476	12.9733	9.63094	12.3464	13.1622	12.5718	11.7173	10.6737	12.637				73.5	-0.9002	0.58895	0.42195	-0.42961	-0.09391	0.9741	0.61852	-0.16379	0.86522	-0.98759	0.32817	0.32128	0.0509	-0.49741	-1.26628	0.73503				73.5	2.54549	2.5378	3.80916	4.99998	3.73965	3.93803	3.75233	4.37286
	73.6	12.6359	11.4895	9.84998	11.2603	10.4504	7.57769	11.9219	11.7693	13.4818	9.7427	12.1622	12.878	12.1326	12.1318	10.1712	12.8735				73.6	-1.47045	0.93665	0.27212	-0.45726	0.71146	0.39474	1.17333	-0.0723	0.40663	-0.81307	0.1674	0.52779	0.12455	-0.18155	-1.11456	0.47607				73.6	2.06316	2.56246	4.03447	5.35787	3.95188	3.38963	3.55023	4.0526
	73.7	12.683	11.8919	10.3838	10.9495	10.512	8.33026	11.9331	11.6112	13.1617	9.87411	11.9298	12.7475	12.107	12.3516	10.2629	12.1112				73.7	-1.75655	0.60371	-0.1808	-0.29017	1.45755	0.19618	1.52392	0.44987	-0.37138	-0.22526	-0.39795	0.72552	0.18407	0.13177	-1.16066	0.30416				73.7	1.92173	3.1143	3.7912	4.47389	3.84964	3.53165	3.389	3.71602
	73.8	12.7062	12.4752	10.6399	10.9757	10.3038	9.46002	12.2803	11.2742	12.0821	9.60202	11.8591	12.6551	12.1896	11.9771	10.7756	10.9357				73.8	-1.7097	-0.09087	-0.8538	-0.15568	1.57662	0.19946	1.17575	0.71827	-0.82947	0.36688	-0.95611	1.02752	0.16277	0.60168	-1.11089	0.62841				73.8	2.12326	3.79227	4.00073	3.55451	3.48535	3.82872	3.59148	3.65785
	73.9	12.7453	12.8186	10.719	11.6591	10.0232	9.73648	12.5676	11.1439	11.1668	9.1365	12.1839	12.3501	12.0071	11.4136	11.05	10.0694				73.9	-1.23331	-0.72248	-1.28447	-0.0387	1.30013	0.1978	0.20272	0.5574	-0.71351	0.62569	-1.1353	1.21234	-0.21934	0.97553	-0.61062	1.08532				73.9	2.63595	4.13086	4.66511	3.21687	3.41864	3.72153	4.13752	4.28165
	74	12.4235	12.7136	10.7751	12.2276	10.2491	9.06949	12.7875	11.4382	11.1098	9.20342	13.1927	11.9975	11.7477	11.2127	10.8951	9.8663				74	-0.31608	-0.92803	-1.22928	0.3206	1.17682	0.20105	-0.69119	0.01468	-0.28756	0.55379	-0.82269	1.29046	-1.08384	0.90784	0.11956	0.86039				74	3.02931	3.9078	4.99383	3.01884	3.89436	3.38231	5.02557	5.33975
	74.1	11.888	12.4248	10.5838	12.0716	11.057	8.65464	12.9041	11.9557	11.6729	9.81654	14.286	11.8328	11.534	11.342	10.4756	10.2195				74.1	0.66965	-0.89841	-0.80865	0.88859	1.18911	0.08612	-1.01038	-0.62858	0.04687	0.50154	-0.16974	1.54975	-1.88228	0.53173	0.61179	-0.24053				74.1	3.20521	3.20524	4.76094	2.74615	4.57666	3.34087	6.10917	5.78566
	74.2	11.8032	12.1882	9.98708	11.5193	11.8673	9.02692	12.775	12.2686	12.2484	10.6987	14.5557	11.9003	11.3853	11.5261	10.0699	10.7163				74.2	1.08387	-1.00887	-0.20842	1.40494	0.99593	-0.13919	-0.83623	-0.95583	-0.05811	0.66004	0.47134	1.89405	-1.9115	0.30415	0.77879	-1.19063				74.2	3.83042	2.53144	4.06016	2.51058	5.04596	3.62946	6.52247	5.06506
	74.3	12.2013	12.1735	9.23826	10.841	12.1475	9.56238	12.5792	12.3068	12.6731	11.6092	13.9986	12.2301	11.5406	11.6433	10.1962	10.8532				74.3	0.75085	-0.9917	0.33077	1.60024	0.44688	-0.23023	-0.52034	-0.95396	-0.55598	0.75515	0.84021	2.07382	-1.28072	0.62362	0.72885	-1.10142				74.3	4.8584	2.54613	3.1379	2.68484	5.17411	3.70539	5.59044	3.84666
	74.4	12.516	12.7259	8.75123	10.3054	11.886	9.74508	12.5823	12.0233	13.149	11.9156	13.2855	12.7014	11.9645	11.7025	11.0855	10.6354				74.4	0.28551	-0.64251	0.59988	1.24916	-0.40054	0.04101	-0.29579	-0.72414	-0.75613	0.54187	0.89538	1.98395	-0.66936	1.23176	0.40534	-0.45274				74.4	5.38952	3.3952	2.34633	3.48775	5.00499	3.37398	4.17807	2.81016
	74.5	12.5995	13.5869	8.74899	10.378	11.3569	9.43688	12.7047	11.4433	13.6019	11.4557	12.8933	12.9416	12.3118	11.6541	12.0197	10.5567				74.5	0.08476	-0.42304	0.47385	0.52069	-1.08341	0.54509	-0.20987	-0.32187	-0.16298	0.1321	0.69907	1.59438	-0.53768	1.37403	-0.06628	-0.05301				74.5	5.06071	4.40354	2.02412	4.63955	4.77457	3.20031	3.81042	2.05323
	74.6	12.7624	13.9824	9.05004	10.977	10.6874	8.97659	12.7657	11.1197	13.6276	10.7876	12.8445	13.1207	12.3331	11.4986	12.1934	10.5742				74.6	-0.00981	-0.49125	0.11746	-0.20367	-1.21531	0.67674	-0.32264	-0.04053	0.70284	-0.28348	0.4244	1.18487	-0.83812	0.93714	-0.25844	0.01488				74.6	4.10699	4.94274	2.39025	5.75571	4.81458	3.45091	4.47385	1.80651
	74.7	12.9907	13.7116	9.07235	11.5172	10.203	8.77544	12.7887	11.2337	13.0181	10.165	12.996	13.7332	12.0404	11.4769	11.8298	10.1919				74.7	-0.00561	-0.39324	0.05271	-0.78886	-0.98075	0.17006	-0.59378	-0.16224	1.14078	-0.58861	0.1802	0.95771	-1.17235	0.44602	0.1162	-0.07906				74.7	3.00508	4.89625	3.14844	6.43765	4.89828	3.66104	4.7072	2.30186
	74.8	13.0101	13.2074	8.52525	11.6568	10.5693	8.83494	12.7623	11.1811	11.965	9.39543	13.0368	14.4532	11.7027	11.7043	11.5314	9.43609				74.8	0.4462	-0.05697	0.38926	-1.01792	-0.71735	-0.41427	-0.57693	-0.53274	1.16703	-0.83849	-0.04918	0.5963	-1.28759	0.21868	0.72488	-0.27011				74.8	2.20946	4.32848	3.76413	6.45136	4.65963	3.70011	3.88731	3.21298
	74.9	13.0779	13.0819	8.0061	11.5738	11.6537	9.21898	12.4929	10.8042	10.9738	8.78422	12.8183	14.6088	11.3433	11.9131	11.4317	8.80521				74.9	1.31098	0.1265	0.65817	-0.84149	-0.59476	-0.60848	0.01318	-0.64552	0.97365	-1.23551	-0.11063	0.0164	-1.23218	0.26095	0.97515	-0.34727				74.9	1.91588	3.70356	4.1424	5.94244	4.17279	3.91038	2.78905	3.75438
	75	13.487	13.2754	8.21136	11.5478	12.2749	9.96056	11.9188	10.6195	10.5445	9.02942	12.7758	14.3329	10.9906	11.8895	11.4054	8.60957				75	1.774	0.08425	0.61979	-0.73068	-0.42492	-0.57816	0.63648	-0.2624	0.50719	-1.65953	0.00962	-0.21236	-0.97143	0.33403	0.72109	-0.15754				75	2.18175	3.41311	4.43019	5.09797	3.72015	4.25516	2.30754	3.60717
	75.1	14.0122	13.1077	9.05576	11.872	11.6671	10.3087	11.462	10.7094	10.6836	9.89548	12.9763	14.1465	11.0767	11.736	11.3928	9.03167				75.1	1.21095	0.07562	0.41865	-1.01883	-0.06693	-0.45199	0.74518	0.1419	-0.11228	-1.64184	0.1822	0.11529	-0.52162	0.18007	0.34084	0.24677				75.1	2.79144	3.3253	4.55165	4.32192	3.6007	4.28029	2.53191	3.51482
	75.2	14.3993	12.4598	9.83554	12.7256	10.4773	9.39101	11.2684	10.7065	11.1833	10.423	12.912	14.1027	11.522	11.5423	11.3035	9.89462				75.2	-0.13857	0.31489	0.25685	-1.58172	-0.04605	-0.18504	0.55554	-0.03452	-0.51292	-1.18369	0.45529	0.40612	-0.11566	0.0407	0.08792	0.6783				75.2	3.57428	3.41718	4.51637	4.0019	3.7613	4.04709	3.03407	3.78108
	75.3	14.3244	11.7441	10.1552	13.4597	9.82073	7.80886	10.9502	10.5703	11.9478	10.0718	12.5581	13.9537	11.8919	11.3888	11.2843	10.7368				75.3	-1.19368	0.81511	0.36964	-1.91475	-0.54916	0.02982	0.45258	-0.61815	-0.55941	-0.92878	0.62947	0.35408	0.10771	0.27331	-0.22436	0.80344				75.3	4.34431	3.78504	4.43196	3.84991	3.85687	4.20669	3.75196	3.42135
	75.4	13.6493	11.1876	10.4801	13.2126	10.2425	6.95901	10.7263	10.4758	12.6632	9.14907	12.2715	13.5544	12.1992	11.4265	11.4716	11.4873				75.4	-1.11276	1.32433	0.70523	-1.63314	-0.78943	0.08207	0.59766	-1.04125	-0.51955	-1.10334	0.57882	0.19286	0.12909	0.66226	-0.61902	0.45529				75.4	4.42001	4.21692	4.11949	3.85243	3.83101	4.58675	4.74943	2.48865
	75.5	12.9983	11.0345	11.0051	12.2093	11.4796	6.9924	11.2749	10.3764	12.9848	8.58353	12.0743	12.9079	12.3461	11.6904	11.779	12.1304				75.5	-0.43461	1.27155	0.83415	-1.13044	-0.40116	0.2076	0.99716	-1.12193	-0.66889	-1.15808	0.58186	0.00229	0.000345977	0.76005	-0.77968	0.00938				75.5	3.67376	4.17064	3.49907	4.2303	3.9049	4.36429	5.58029	2.43237
	75.6	13.0419	11.429	11.2629	11.2736	12.6522	7.33866	12.6132	10.1504	12.9231	8.86032	11.8394	12.1489	12.152	12.2278	11.9968	12.395				75.6	-0.0351	0.39821	0.64043	-0.83432	0.03473	0.40417	1.29402	-0.87022	-0.90447	-0.87872	0.5856	-0.28966	-0.1808	0.49356	-0.51915	-0.12684				75.6	3.09762	3.4496	3.20728	4.31019	4.19592	3.69898	5.81486	3.38772
	75.7	13.6607	11.9965	11.2786	10.6902	13.0457	7.99383	14.0612	9.81506	12.2011	9.57401	11.4859	11.5816	12.0453	12.8327	11.8583	12.1673				75.7	-0.03836	-0.79525	0.42316	-0.63558	0.05887	0.45131	1.10415	-0.34499	-0.93809	-0.64636	0.37713	-0.53346	-0.24721	0.18831	0.03662	0.001				75.7	3.4373	2.93156	3.59593	3.79103	4.42714	3.30511	5.66066	4.18598
	75.8	14.2307	12.4493	11.2475	10.253	12.8657	8.57004	14.7876	9.59817	10.6791	10.2483	11.1317	11.6245	12.4324	12.8443	11.6442	11.6813				75.8	-0.17411	-1.65423	0.28491	-0.57577	-0.23823	0.51233	0.59566	0.08825	-0.7305	-0.38787	-0.00014501	-0.6155	0.03961	0.11284	0.51052	0.08453				75.8	4.28341	3.47019	3.92341	3.55047	4.27606	3.52968	5.41291	4.62957
	75.9	14.4562	12.9916	10.879	9.93043	12.4877	8.20483	14.4091	9.84272	9.48782	10.4352	11.3304	12.3118	13.2349	12.0361	11.8678	11.3876				75.9	-0.22088	-2.0052	0.12208	-0.74123	-0.63523	0.93607	0.1954	0.10077	-0.25894	0.24383	-0.57563	-0.4786	0.62501	0.15056	0.47877	-0.04634				75.9	4.81412	4.62782	3.80703	4.04147	3.9703	4.33063	4.75866	5.62328
	76	14.4743	13.6896	10.2401	10.0055	11.9942	7.12083	13.3478	10.3895	9.71336	9.80526	12.3999	12.9623	14.127	11.1203	12.2385	11.2792				76	-0.11479	-1.97659	0.04106	-0.71893	-1.04674	1.71321	0.09907	-0.28395	0.36077	0.93872	-1.17105	0.0533	1.20698	0.10537	0.02022	-0.33864				76	5.11113	5.45233	3.78167	4.66091	3.81577	4.98265	3.60352	7.03558
	76.1	14.3628	14.293	9.8136	10.7141	11.7322	6.37628	12.5074	10.6813	10.9959	8.99165	13.6919	13.0706	14.5753	10.9509	12.2254	10.9573				76.1	-0.07558	-1.78814	0.12563	-0.151	-1.35707	2.35982	0.30091	-0.74018	0.69106	1.1313	-1.4851	0.57181	1.52112	0.11965	-0.3021	-0.57324				76.1	5.38627	5.55889	3.89348	4.5189	3.72117	4.69546	2.97442	7.52839
	76.2	14.0052	14.5013	9.72468	11.5668	12.2401	6.45767	12.3578	10.8429	12.0981	8.98217	14.2199	12.9256	14.2731	11.5153	11.79	10.4875				76.2	-0.39707	-1.62058	0.35003	0.58546	-1.27195	2.24164	0.60181	-0.85232	0.63587	0.7891	-1.66354	0.38756	1.3114	0.44252	-0.24273	-0.61793				76.2	4.96307	5.11717	3.76626	3.53503	3.54316	3.93321	3.54965	6.67296
	76.3	13.351	13.9278	9.7924	11.6499	13.368	7.19274	12.4272	11.5005	12.2134	9.47657	13.8117	12.7658	13.4179	11.9872	11.1559	10.0987				76.3	-0.72961	-1.33269	0.60226	0.77335	-0.73996	1.44551	0.64974	-0.58443	0.49404	0.33626	-1.72686	-0.14695	0.68046	0.96028	-0.09941	-0.5364				76.3	3.88768	4.53702	3.78034	2.65185	3.34277	3.79112	4.52905	5.45034
	76.4	12.7129	12.657	9.96747	11.1793	14.2254	8.10836	12.2538	12.3293	11.8726	9.73918	13.158	12.2886	12.3824	11.9298	10.6515	9.55606				76.4	-0.53081	-0.71202	0.48937	0.2187	-0.28649	0.74355	0.34189	-0.29859	0.44892	0.02842	-1.53137	-0.26864	0.03868	1.31007	-0.21427	-0.26114				76.4	3.22163	4.07799	4.32096	2.55363	3.56631	4.04485	4.91365	4.92534
	76.5	12.3966	11.3958	10.1976	11.1043	14.2195	8.69574	12.1243	12.427	11.7907	9.93942	12.9566	11.4681	11.4359	11.8566	10.7442	8.6907				76.5	-0.01209	0.05246	-0.22955	-0.53599	-0.23649	0.52355	-0.12386	-0.31693	0.76456	-0.17025	-1.17022	0.04668	-0.48364	1.2001	-0.61267	0.10075				76.5	3.20051	3.78189	4.9375	2.86902	4.42732	3.6963	4.52159	5.19246
	76.6	12.3586	10.5246	10.2813	11.4489	13.4867	8.97701	12.3884	11.7264	11.8412	10.3471	13.3868	10.9592	10.7411	12.2692	11.3829	7.99274				76.6	0.31594	0.57645	-1.15843	-0.7645	-0.18282	0.58747	-0.50015	-0.72182	1.67194	-0.25057	-0.68119	0.50575	-0.96114	0.55089	-0.8511	0.24904				76.6	3.38226	3.76379	5.14326	3.21673	5.29941	3.02077	3.69835	5.64903
	76.7	12.6936	10.0785	10.2972	11.5477	12.5492	9.51382	13.0239	10.947	11.695	10.8207	13.9897	11.4002	10.5065	12.9369	11.7852	8.20987				76.7	0.22603	0.66238	-1.66713	-0.22553	0.14247	0.59633	-0.54276	-1.10261	2.64868	-0.20029	-0.15655	0.83005	-1.2022	-0.35954	-0.36339	0.28148				76.7	3.57349	4.1976	4.96126	3.71022	5.71095	3.08781	2.85761	5.69612
	76.8	13.4774	10.164	10.3788	11.201	11.9355	10.5573	13.7017	10.7772	11.4471	11.127	14.1404	12.3862	10.8201	13.3672	11.5045	9.2709				76.8	-0.20478	0.18989	-1.63664	0.60337	0.47089	0.36814	-0.28458	-0.94479	2.95418	-0.41484	0.09788	0.80551	-0.84845	-0.88792	0.78185	0.44574				76.8	3.51699	4.70383	4.73125	4.06997	5.7558	3.8516	2.51329	5.12435
	76.9	14.165	10.469	10.3886	10.7908	11.8669	11.5412	13.9653	11.2582	11.4073	11.1669	13.8331	13.0974	11.5429	13.433	10.8838	10.2586				76.9	-0.68113	-0.58748	-1.38666	1.09405	0.64144	0.05437	-0.12348	-0.41732	2.55549	-0.9555	-0.00634	0.60873	0.01686	-0.6814	1.74755	0.5994				76.9	2.93816	4.68254	4.61321	3.95783	5.43711	4.25535	2.98461	4.20789
	77	14.3608	10.4878	10.4791	10.68	12.1493	12.0359	13.8176	11.7594	11.6099	11.1189	13.3785	13.4401	12.181	12.9877	10.5183	10.7185				77	-0.90101	-1.02822	-0.93138	1.1518	0.78797	-0.08666	-0.1514	-0.09279	1.72452	-1.10573	-0.31578	0.4801	0.79264	-0.22423	1.91417	0.47764				77	2.19264	4.51712	4.49171	3.68742	4.70877	3.914	3.80193	3.47162
	77.1	14.2307	10.2061	10.9052	10.6981	12.3568	12.1214	13.625	11.6567	11.9937	11.0575	12.9324	13.7126	12.0819	11.8981	10.6591	10.9016				77.1	-0.90345	-0.88079	-0.33611	0.9231	0.81375	-0.04337	-0.23115	0.0092	0.75458	-0.73172	-0.78064	0.16968	0.99151	-0.09579	1.45121	0.25142				77.1	1.96534	4.69698	4.02915	3.6419	3.76714	3.61286	4.30283	3.52943
	77.2	13.7646	9.80603	11.2233	10.571	12.4431	11.8363	13.2506	11.0539	12.4144	11.0029	12.6677	13.984	11.3837	10.6288	11.0557	10.9873				77.2	-0.90746	-0.49699	-0.11295	0.49138	0.43729	0.18509	-0.47213	0.28601	0.01653	-0.40374	-0.9924	-0.43842	0.66794	-0.15469	0.6054	0.24009				77.2	2.30368	4.68569	3.22744	3.84338	3.0873	3.93034	4.62757	4.48065
	77.3	13.1103	9.46337	10.8908	10.5717	12.6689	11.1733	12.4489	10.6766	12.2983	11.357	12.5105	14.0596	10.9033	9.89694	11.4249	10.8974				77.3	-0.85775	-0.24892	-0.36244	-0.00688	-0.25298	0.48593	-0.79384	0.7386	-0.54673	-0.36722	-0.50707	-0.83688	0.19788	-0.06474	-0.60037	0.31225				77.3	2.87837	4.08143	2.70495	4.09798	2.98443	4.45034	4.93727	5.18897
	77.4	12.8158	9.38653	10.2986	11.0246	12.8362	10.3084	11.6267	10.9381	11.4674	12.0939	12.0837	13.7678	11.2004	10.2018	11.7536	10.6178				77.4	-0.53729	-0.13225	-0.59605	-0.36996	-0.80933	0.42148	-0.8264	1.06894	-1.12042	-0.55653	0.1731	-0.70449	-0.07765	0.1863	-1.77173	0.15341				77.4	3.40158	3.36963	2.77025	4.13892	3.46562	4.64556	4.79659	4.65767
	77.5	12.941	9.73806	10.1947	11.6587	12.4223	9.68457	11.1884	11.5994	10.6411	12.356	11.4334	13.1641	12.3248	11.342	12.0082	10.4234				77.5	-0.05558	-0.00523	-0.67455	-0.41072	-0.8515	-0.07903	-0.52315	0.96264	-1.20598	-0.76262	0.46883	-0.28098	-0.09863	0.30884	-2.05467	-0.20553				77.5	3.3618	3.00949	2.97125	4.00947	4.34597	4.46629	4.20579	3.82098
	77.6	13.2532	10.8985	10.8011	12.0289	11.5648	9.7398	11.3997	12.3219	10.24	11.6637	11.134	12.4927	13.5672	12.3013	12.1248	10.6445				77.6	0.18837	0.08102	-0.7669	-0.33413	-0.32767	-0.41762	-0.28659	0.2712	-0.40212	-0.92309	0.61973	-0.05868	-0.0169	0.12858	-1.14425	-0.50209				77.6	2.68469	3.02915	2.87044	4.23997	5.08123	4.11578	4.06505	3.91193
	77.7	13.7765	12.6387	11.7744	12.1258	11.0505	10.3193	12.1755	12.8723	9.98109	10.5435	11.4963	12.0093	13.8551	12.3638	12.1204	11.151				77.7	0.35074	-0.00985	-0.65543	-0.48692	0.51165	-0.1556	-0.24945	-0.4939	0.55578	-1.02013	0.95454	-0.40096	0.15574	-0.06551	0.10992	-0.67128				77.7	2.17118	3.14807	2.65807	4.7375	4.95425	3.82709	4.62083	4.63124
	77.8	14.5633	13.8066	12.6047	12.222	11.3151	10.8353	12.7022	12.9432	9.82208	9.66479	12.3996	11.7764	13.2061	11.6661	11.8549	11.4349				77.8	0.89852	-0.30777	-0.14272	-0.61677	1.20175	0.41403	-0.01754	-0.67058	0.84574	-0.91348	1.31803	-0.96648	0.3054	-0.03685	0.70773	-0.75921				77.8	2.27243	2.91199	2.81696	4.66929	4.08272	3.58075	4.95055	4.90119
	77.9	15.2247	14.0532	12.9483	12.2462	12.1026	10.9979	12.6248	12.3284	9.96521	9.3237	13.2901	11.7582	12.405	10.7052	11.4889	11.4234				77.9	1.48367	-0.61253	0.31638	-0.23941	1.50934	0.8414	0.59519	-0.57162	0.63479	-0.75895	1.49272	-1.0631	0.21683	0.05432	0.76969	-0.67259				77.9	2.55235	2.13891	3.32442	4.01142	3.46522	3.29399	4.60873	4.30619
	78	15.1075	13.985	12.6821	12.0944	12.8424	11.0747	12.3215	11.3282	10.0946	9.4474	13.309	11.847	11.7625	10.1693	11.6264	11.5151				78	1.42456	-0.49901	0.27651	0.49007	1.78587	1.01948	1.19883	-0.87152	0.37039	-0.77524	1.39436	-0.47812	0.10152	0.28069	0.75255	-0.24288				78	2.63809	1.40989	3.83177	3.73378	3.26172	3.42933	4.1368	3.59123
	78.1	14.3454	13.676	12.0628	11.9698	13.2429	11.3838	11.9209	10.501	9.91441	9.76235	12.3278	11.8978	11.3636	10.3093	12.3305	11.711				78.1	0.85192	0.0688	0.10851	1.04072	2.19851	0.85676	1.37415	-1.48346	0.24537	-0.76914	0.95409	0.47541	0.1082	0.71339	0.59971	0.56556				78.1	2.77329	1.30529	4.2088	4.27954	3.03445	4.07588	4.09799	3.72257
	78.2	13.6151	12.8935	11.4118	11.8281	13.3461	11.7178	11.7473	10.2082	9.79086	9.91934	11.1995	11.949	11.3143	10.595	13.0063	11.6272				78.2	0.5305	0.58197	0.38225	1.25313	2.17876	0.37849	1.12203	-1.97632	0.37105	-0.59077	0.22189	1.31979	-0.14781	0.67751	0.41238	1.29382				78.2	3.21795	1.60849	4.46975	4.96088	3.04091	4.20544	4.4086	4.50454
	78.3	13.3041	11.7924	10.8036	11.559	13.0566	11.8413	12.4258	10.3811	10.1505	9.85118	10.674	12.0634	11.6061	10.7997	13.3257	11.156				78.3	0.62559	0.88988	0.72672	1.16801	1.56279	-0.11168	0.76467	-2.22108	0.58184	-0.42546	-0.46705	1.75415	-0.62308	-0.02078	0.337	1.16706				78.3	3.92893	1.82955	4.69487	5.00321	3.40874	3.52837	4.64492	4.74375
	78.4	13.5844	10.9444	10.7255	11.5648	12.3693	11.9465	13.6995	10.532	10.7328	9.73209	10.8795	12.1717	11.9594	11.2387	13.4082	10.328				78.4	0.38215	1.09592	0.37548	0.92876	1.13232	-0.42243	0.54225	-2.28104	0.46174	-0.54635	-0.65818	1.71755	-0.64049	-0.27891	0.25172	0.16204				78.4	4.62366	1.90397	4.749	4.36689	3.68456	3.16322	4.68227	3.92884
	78.5	14.0711	10.5896	11.4827	12.0428	11.6507	12.1272	14.5502	10.6363	10.8518	9.78074	11.6166	12.1518	12.1334	11.9665	13.0647	9.35751				78.5	-0.38679	0.84934	-0.43306	0.93967	1.12028	-0.43976	0.45399	-2.17517	0.04455	-0.87177	-0.25316	1.30305	-0.03378	0.37384	0.12439	-0.79441				78.5	4.97481	1.99757	4.4302	3.60392	3.94908	3.55097	4.67685	2.95256
	78.6	13.9282	10.1966	12.3511	12.148	11.1883	12.0947	14.4598	11.0831	10.4416	10.0989	12.6854	12.1584	12.2852	12.4785	12.0269	9.03735				78.6	-0.83529	-0.03291	-0.7231	1.33356	0.82055	-0.0641	0.25847	-1.65168	-0.13169	-0.98457	0.32142	0.73015	0.7488	0.86453	-0.000197136	-0.97277				78.6	4.98706	2.07336	3.72623	3.17972	4.55301	3.87107	4.68421	2.7919
	78.7	13.047	9.71431	12.6231	11.1066	10.7562	11.6248	13.7971	11.5783	9.88043	10.5336	13.6963	12.4811	12.3873	12.3064	10.8917	9.6399				78.7	-0.65546	-0.79299	-0.34978	1.78626	0.03869	0.42586	-0.21449	-0.56813	0.26943	-0.66139	0.63094	0.58714	1.30365	0.48243	-0.03794	-0.60651				78.7	4.84493	2.06541	2.80727	3.16013	5.12173	3.49284	4.60275	3.32265
	78.8	12.003	9.85825	12.5756	9.4828	10.1702	10.9868	13.3966	11.5256	9.26685	10.9719	14.0307	12.9813	12.1922	11.7996	10.4727	10.4068				78.8	-0.60307	-0.79999	-0.09321	1.98408	-0.57713	0.57393	-0.70047	0.46631	1.04011	-0.05651	0.74852	1.13569	1.3245	-0.09244	0.10519	-0.3864				78.8	4.64136	2.09983	2.163	3.31727	5.27424	2.56139	4.34642	3.75802
	78.9	11.282	10.6003	12.8644	8.36799	9.85137	10.4878	13.6313	11.1938	8.7798	11.5435	13.6064	13.1769	11.8187	11.3594	10.9674	10.8097				78.9	-1.05336	-0.52132	-0.20531	1.80699	-0.71635	0.35317	-0.73142	0.74535	1.59167	0.50805	0.87362	1.51232	0.81042	-0.04741	0.32026	-0.51948				78.9	4.45949	2.3906	2.1584	3.38367	5.2119	1.75741	4.00594	3.75746
	79	11.2306	11.2134	13.409	8.09276	10.1057	10.0857	13.9248	11.3373	8.82899	12.0045	12.9062	12.8419	11.5569	10.8546	11.9178	10.7623				79	-1.3571	-0.42066	-0.42246	1.21125	-0.8883	0.08891	-0.19817	0.4695	1.63229	0.80204	0.98393	1.07724	0.39019	0.36078	0.36783	-0.8035				79	4.37169	3.08238	2.33438	3.31887	5.03906	1.65611	3.93219	3.71647
	79.1	12.1315	11.6068	13.6059	8.45399	10.7475	9.89878	13.5352	11.9804	9.37135	11.8135	12.231	12.3491	11.6964	10.3867	12.4043	10.4029				79.1	-1.04961	-0.22694	-0.72124	0.21451	-1.45113	0.16168	0.47366	0.30063	1.49865	0.76896	0.98989	0.35661	0.48823	0.5019	0.22122	-1.11277				79.1	4.19173	3.84901	2.26192	3.16957	4.5373	2.19285	4.43162	4.11077
	79.2	13.6182	12.1091	13.347	9.06557	11.4138	9.95307	12.6575	12.3009	9.85522	11.4081	11.6428	12.1462	12.266	10.342	12.1118	10.1877				79.2	-0.32001	0.1927	-0.85579	-0.7307	-1.93133	0.7065	0.81371	0.38227	1.41879	0.48041	0.89299	-0.08547	0.50119	0.4062	0.1256	-1.16096				79.2	4.02258	4.063	2.22988	2.90442	3.75266	2.94433	5.21956	4.65374
	79.3	14.8692	12.6666	13.085	9.41286	11.4919	9.71827	12.126	11.9492	10.1131	11.5819	11.3733	12.1626	12.5678	10.708	11.9199	10.2102				79.3	0.50435	0.42267	-0.61137	-0.94044	-1.72676	1.34559	0.90851	0.40003	1.23505	0.11843	0.70962	-0.28849	-0.03107	0.40545	0.18871	-0.76751				79.3	4.03606	3.82891	2.48785	2.8312	3.08088	3.55805	5.56558	4.7029
	79.4	15.5172	12.9996	12.9814	9.47097	10.8846	8.97576	12.1875	11.617	10.2866	12.1458	11.4417	12.2502	12.0579	11.1746	12.4699	10.1746				79.4	1.13959	0.19032	-0.41843	-0.33353	-0.85127	1.56267	0.91662	0.27782	0.90643	-0.18713	0.55578	-0.4114	-0.56797	0.3749	0.18912	-0.25737				79.4	3.83887	3.70235	2.85608	3.36556	2.76761	4.24859	5.2467	4.36106
	79.5	15.4689	12.7874	12.5807	9.93805	10.4189	8.37891	12.4755	11.8841	10.047	12.3519	11.5422	12.4663	11.1187	11.5788	13.1326	10.2674				79.5	1.26322	-0.18186	-0.66222	0.53372	0.17211	1.14588	0.61421	0.38532	0.59007	-0.38653	0.48534	-0.58399	-0.57511	0.02645	-0.02117	0.05671				79.5	3.48411	3.84194	3.21748	4.20574	2.60364	5.31503	4.635	3.91414
	79.6	14.9337	12.1029	11.7581	11.0818	10.4224	8.40306	12.7659	12.5976	9.31731	11.7219	11.7733	12.4371	10.4408	11.9225	12.7233	10.6561				79.6	0.65834	-0.29709	-1.1007	1.04108	0.78082	0.28763	0.12934	0.77098	0.47306	-0.33363	0.27726	-0.77618	-0.27165	-0.24988	-0.184	0.12507				79.6	3.40875	4.04346	3.95825	4.92481	2.48032	5.96633	3.96555	3.44037
	79.7	14.7514	11.6806	11.0401	12.291	10.3318	8.71222	12.8347	13.2587	8.86122	10.3451	12.2839	11.8367	10.241	12.1605	11.2432	10.8949				79.7	-0.29961	-0.1033	-1.23558	1.00672	0.8852	-0.46118	-0.11932	0.86752	0.62454	-0.09246	-0.01866	-0.75634	-0.10948	-0.0706	0.03756	-0.0291				79.7	3.36384	3.97524	4.97707	5.49876	2.58466	5.42162	3.21951	3.18213
	79.8	15.2108	11.8542	10.9024	12.945	10.0128	8.83302	12.3876	13.6594	9.09533	8.92096	12.7704	11.3126	10.3066	12.0314	9.97257	10.9073				79.8	-0.99488	0.22334	-0.88931	0.70704	0.73268	-0.81196	-0.09495	0.4167	0.81175	-0.01571	-0.04926	-0.53626	-0.28371	0.17247	0.51197	-0.23952				79.8	3.21484	3.47356	5.47088	5.42007	2.96508	4.34081	2.41088	3.40518
	79.9	15.5241	12.122	11.1546	12.9868	9.76183	8.82501	12.0405	13.8484	9.76836	8.27577	13.1336	11.5172	10.5343	11.4234	9.769	11.1033				79.9	-1.2432	0.42255	-0.39954	0.27866	0.42483	-0.96962	-0.03712	-0.08992	0.91152	-0.16049	0.15345	-0.23491	-0.51984	0.12735	0.77529	-0.29412				79.9	3.43444	2.83893	5.10886	4.59511	3.48449	3.69451	1.87848	4.10469
	80	15.3679	12.1853	11.1607	12.5153	9.69919	9.26386	12.6294	13.6304	10.6149	8.54717	13.4975	12.1065	11.141	10.878	10.4777	11.3187				80	-1.08352	0.3622	-0.09036	-0.17161	0.00478	-1.02725	-0.06844	-0.10555	1.11281	-0.05329	0.14417	0.076	-0.40931	0.01079	0.66816	-0.1457				80	4.01364	2.74004	4.3455	4.03475	4.25886	3.62696	2.0388	4.83126
	80.1	15.3816	12.2115	10.8874	11.4471	9.91714	10.3893	13.4125	13.1042	11.2462	9.25383	13.6176	12.4643	12.1851	10.9962	11.4226	11.116				80.1	-0.69689	0.04572	0.20559	-0.31114	-0.4781	-1.01145	-0.25614	0.22695	1.29263	0.53495	-0.14422	0.17775	0.04224	0.06775	0.56409	-0.03286				80.1	4.4706	3.40085	3.85903	4.1133	5.22741	3.89353	2.69194	5.13212
	80.2	15.9747	12.2427	10.772	10.0721	10.4316	11.4298	13.1223	12.7044	11.1661	9.85454	13.2944	12.4633	13.2959	11.4456	12.0044	10.6109				80.2	-0.44516	-0.42352	0.57261	-0.06182	-0.96163	-1.03552	-0.57989	0.58015	1.07834	1.05674	-0.11151	-0.06258	0.57074	0.1809	0.74648	-0.20072				80.2	4.66473	4.23415	4.06939	4.1842	5.96	4.14813	3.26793	4.95726
	80.3	16.5792	12.3659	10.7411	9.27567	11.0007	11.4444	11.9763	12.2794	10.6918	9.9538	12.8869	12.2968	14.0802	11.6012	12.3329	10.3459				80.3	-0.4635	-0.72667	0.60071	0.25212	-1.2453	-0.9171	-0.80051	0.93766	0.42207	0.98389	0.36066	-0.47134	0.81434	0.0799	0.99401	-0.32766				80.3	4.6636	4.70796	4.70693	3.96228	6.09936	4.13989	3.48089	4.53069
	80.4	16.5369	12.7479	10.5562	9.47433	11.3416	10.4129	11.0531	11.4572	10.4548	9.71178	12.6315	12.1898	14.3059	11.7738	12.7411	10.7036				80.4	-0.57319	-0.67263	0.06761	0.50645	-1.12993	-0.52702	-0.77987	1.10037	-0.4124	0.44711	0.72277	-0.81171	0.46816	-0.31579	1.05048	-0.12913				80.4	4.66042	4.9192	4.88756	3.63088	5.32837	3.97631	3.61425	4.00474
	80.5	16.2339	13.0067	10.3593	10.1608	11.4679	9.00262	10.9456	10.5498	10.3575	9.71057	12.2689	12.4435	13.9603	12.5333	13.0603	11.2458				80.5	-0.66841	-0.50739	-0.62825	0.91477	-0.52483	-0.17797	-0.52526	0.80978	-1.00239	-0.13705	0.79633	-1.18589	-0.13188	-0.79148	0.91085	0.17272				80.5	5.03453	5.03783	4.25866	3.33417	4.16992	3.92256	4.18575	3.39725
	80.6	16.2872	12.6417	10.5087	10.7099	11.5745	7.98631	11.6603	10.2212	10.3419	10.2209	11.7355	13.0564	13.2355	13.3774	12.9098	11.1405				80.6	-0.77336	-0.27283	-1.0985	1.30975	0.34634	-0.03987	-0.10857	0.24045	-1.17452	-0.30288	0.76444	-1.54128	-0.3788	-1.07021	0.5969	0.481				80.6	5.65877	4.84459	3.66299	3.34047	4.04373	4.01155	4.97288	3.30336
	80.7	16.3162	11.8482	11.034	10.8375	11.4558	7.97622	12.6503	10.6623	10.7586	11.0115	11.3172	13.4741	12.4489	13.4352	12.3256	10.3108				80.7	-0.84123	0.35404	-1.31366	1.08322	0.9346	0.04596	0.26889	-0.23845	-1.07496	0.19909	0.64833	-1.44146	-0.14509	-1.01694	0.09513	0.82454				80.7	5.75806	4.37357	3.6862	3.78774	5.05481	4.02632	5.28312	4.36367
	80.8	16.0317	11.1853	11.3253	10.6388	10.8589	9.05467	13.1177	11.4359	11.3986	11.6063	11.2911	13.1126	12.1872	12.9116	11.8451	9.50338				80.8	-0.78147	1.13744	-1.19241	0.15269	0.87067	0.1454	0.44654	-0.41229	-0.62117	0.90095	0.3427	-0.86242	0.32527	-0.71845	-0.42175	0.94604				80.8	5.07281	4.4236	3.76201	4.35353	5.84288	4.17856	5.10958	5.99264
	80.9	16.0462	11.0113	11.1372	10.5892	10.051	10.5893	12.6053	12.042	11.6023	11.6158	11.7547	12.1503	12.6195	12.3695	11.9302	9.30324				80.9	-0.63024	1.47862	-0.65052	-0.95762	0.22467	0.22113	0.28448	-0.31136	0.17534	1.04507	0.00483	-0.1379	0.64219	-0.6803	-0.5751	0.62877				80.9	4.31471	5.24503	3.50451	4.45257	5.80343	4.94457	4.76915	6.77525
	81	16.472	11.311	11.0181	10.9506	9.30396	11.8142	11.4007	12.2677	11.278	11.1431	12.6317	11.4425	13.1114	11.9191	12.3427	9.44123				81	-0.44024	1.15328	0.10539	-1.74715	-0.59238	0.26397	-0.18505	-0.12948	0.67439	0.62716	-0.00624	0.51729	0.35815	-1.17433	-0.30893	0.08137				81	4.13099	5.76661	3.29812	3.86971	5.27705	5.71983	4.40284	5.96767
	81.1	16.6724	11.553	11.3515	11.3371	8.84008	12.4129	10.5112	12.2438	10.787	10.7608	13.4854	11.558	12.9865	11.7809	12.3106	9.42627				81.1	-0.05495	0.45557	0.74192	-1.83277	-0.92187	0.11835	-0.5218	-0.07213	0.51857	0.24016	0.27898	0.74479	-0.28956	-1.42519	-0.09586	-0.17631				81.1	4.24528	5.12707	3.32798	3.06564	4.49616	5.33619	4.20497	4.32378
	81.2	16.6012	11.2301	11.8455	11.3458	9.11311	12.4272	10.6119	12.2413	10.2154	10.8638	13.7254	12.1036	12.216	11.9268	11.5644	9.39575				81.2	0.46978	-0.09791	0.9465	-1.13104	-0.51092	-0.27234	-0.46304	-0.15237	0.12381	0.21515	0.45049	0.34255	-0.37001	-0.82115	-0.26829	0.06447				81.2	4.10841	3.7958	3.33282	2.70756	3.97973	3.83302	4.02229	3.29165
	81.3	16.8032	10.663	12.2972	11.0331	9.86853	11.9352	11.2499	12.3398	9.64016	11.3242	13.4215	12.122	11.2697	11.8383	10.9062	9.7959				81.3	0.65717	-0.24425	0.75702	-0.12434	0.08013	-0.57777	-0.22216	-0.17068	-0.20783	0.52089	0.31283	-0.13532	0.39129	-0.0182	-0.74435	0.27954				81.3	3.8606	2.75864	3.05924	2.88555	4.32917	2.42862	3.34078	3.06699
	81.4	17.2072	10.3253	12.6822	10.764	10.2927	10.7809	11.6349	12.4456	9.39661	11.6201	13.2947	11.3942	10.6561	11.5254	11.133	10.6583				81.4	0.28219	-0.07641	0.51816	0.37034	0.16793	-0.56334	0.0088	-0.05305	-0.51793	0.79203	-0.02588	-0.06845	1.34475	0.25378	-1.13975	0.09178				81.4	3.89139	2.19897	2.56704	3.31517	4.89265	1.89757	2.09066	2.72716
	81.5	17.0847	10.2386	12.5022	10.7416	10.2809	9.38399	11.5393	12.5065	9.64143	11.1184	13.6571	10.6704	10.3897	11.6266	11.9799	11.4325				81.5	-0.16205	0.22098	0.3237	0.10132	-0.23957	-0.48683	0.29176	0.00143	-0.593	0.66657	-0.30717	0.21336	1.77136	0.17388	-1.10813	-0.14716				81.5	4.09242	1.71771	2.0907	3.86007	4.74771	2.02959	1.13154	2.07155
	81.6	16.2604	10.289	11.7174	10.6774	10.3685	8.8346	11.3414	12.525	10.0068	9.95327	14.0113	10.5534	10.1839	12.3114	12.6459	11.7503				81.6	-0.17609	0.4149	-0.02105	-0.25332	-0.59213	-0.6653	0.79105	-0.2109	-0.16547	0.36271	-0.11142	0.28095	1.43829	0.16548	-0.77181	-0.27536				81.6	4.06079	1.45924	1.87054	4.43873	4.40299	2.35144	1.51405	1.76604
	81.7	15.6573	10.3398	11.0897	10.2055	10.8957	9.19316	11.5808	12.5585	10.0631	9.03962	13.8579	10.9819	10.1232	12.7942	12.7305	11.8307				81.7	0.23195	0.48484	-0.4731	-0.089	-0.76354	-0.97279	1.43429	-0.64199	0.44597	0.50998	0.52588	0.5017	0.8042	0.17226	-0.48377	-0.39884				81.7	4.14166	1.69747	2.18347	4.68189	4.5968	2.73307	3.01158	2.15268
	81.8	15.9618	10.4213	10.981	9.40556	11.6615	9.63816	12.4949	12.7512	10.0094	8.76221	13.3981	11.7677	10.2711	12.721	12.5604	11.6457				81.8	0.65088	0.52147	-0.60526	0.38428	-0.96842	-1.04729	1.70448	-0.91697	0.51491	1.12195	0.89206	1.12069	0.48326	0.07859	-0.30244	-0.34179				81.8	4.73256	2.45699	3.11044	4.20193	4.758	3.44709	4.40937	2.9537
	81.9	16.3351	10.9731	11.2668	8.76691	12.2044	9.93837	13.5932	12.9733	10.2388	9.0118	13.4003	12.6891	10.2554	12.6497	12.6618	11.2181				81.9	0.53872	0.31039	-0.25877	0.76015	-0.77931	-0.8536	1.24	-0.56153	-0.04804	1.3309	0.59841	1.7231	0.43232	0.11935	0.06997	-0.0171				81.9	5.44936	3.52137	4.24361	3.36422	4.43149	4.39112	5.20682	3.80741
	82	15.8353	11.8777	11.852	8.77861	12.1	10.2992	13.8314	12.8167	10.5884	9.63481	14.0167	13.2198	10.1113	12.5369	13.0457	11.3101				82	-0.31313	-0.23066	0.10658	0.85041	0.09638	-0.72209	0.52387	0.26763	-0.40541	0.72251	-0.00333	1.64223	0.27088	0.28634	0.62589	0.42793				82	5.7038	4.24637	4.87728	2.94473	4.30515	4.66386	5.68874	4.67797
	82.1	15.2551	12.0974	12.5693	9.36782	11.4178	10.8893	13.0185	12.2932	10.7838	10.1463	14.5253	13.219	10.2854	11.9421	13.4254	12.0945				82.1	-1.52927	-0.81379	0.19682	0.4975	1.06564	-0.84082	0.13501	0.67915	-0.07474	-0.06446	-0.46672	0.65672	-0.13835	0.15548	0.75955	0.84022				82.1	5.16625	4.43792	4.66387	3.13255	4.60143	4.07789	5.80649	5.35917
	82.2	15.4497	11.4168	13.0824	10.0972	10.8386	11.5882	12.1101	11.566	10.9744	10.2141	14.6364	13.0897	10.6563	11.3509	13.6721	12.6148				82.2	-2.23384	-1.20043	0.09794	0.06542	1.59396	-1.00874	0.08894	0.24676	0.34336	-0.15326	-0.72433	-0.32128	-0.55202	-0.26555	0.1377	1.03967				82.2	4.15996	4.4453	4.08622	3.60416	4.52963	3.56797	5.35537	5.36342
	82.3	15.7626	10.8483	13.0977	10.8095	10.894	11.8867	11.8244	10.559	11.2156	10.1195	14.4258	12.9744	10.9226	11.1778	13.5688	12.2292				82.3	-1.8325	-1.05457	-0.2567	0.2075	1.60742	-0.96446	0.35202	-0.4799	0.06073	0.56368	-0.87171	-0.34294	-0.58286	-0.53446	-0.72431	1.00987				82.3	3.58079	4.47854	3.77633	3.98697	3.90912	3.50732	4.83103	4.89356
	82.4	15.561	11.0175	12.726	11.496	11.4615	11.4136	11.9923	9.67957	11.4191	10.1949	13.9262	12.8712	11.2616	10.9081	13.0021	11.0521				82.4	-0.78023	-0.1104	-0.94677	0.89703	1.27231	-0.50871	1.03886	-0.77998	-0.64476	1.39927	-0.91136	0.20367	-0.35548	-0.41184	-1.13319	1.05058				82.4	3.74693	4.79255	3.60065	4.37359	3.64862	3.73207	4.63229	4.67222
	82.5	15.1304	11.6242	12.1921	12.0808	11.887	10.4845	12.3277	9.77695	11.6712	10.5147	13.4655	12.7116	11.9309	10.3851	12.2521	9.81311				82.5	0.00548	1.03045	-1.67707	1.47547	0.93177	0.18575	1.94386	-0.38218	-0.83961	1.77034	-0.75464	0.55489	-0.36967	-0.02007	-0.797	1.28621				82.5	3.82798	5.32417	3.32017	5.01235	4.07696	4.10728	4.34045	4.60066
	82.6	14.8352	12.1262	11.5739	12.4448	11.6867	9.81249	12.9177	11.0059	12.0425	11.0357	13.2836	12.2715	12.7706	10.2849	11.4908	9.52455				82.6	0.12747	1.45208	-1.93511	1.55753	0.64602	0.38595	2.34358	0.42906	-0.3222	1.62357	-0.48793	0.57241	-0.4219	0.30538	-0.0111	1.4678				82.6	3.30101	5.44133	3.40552	5.5196	4.74033	3.98492	3.74091	4.1152
	82.7	14.6256	12.4753	11.2337	12.3838	10.9962	9.65611	13.4167	12.5215	12.3281	11.3855	13.1183	11.6162	13.3591	10.9005	10.5819	10.0262				82.7	-0.20343	1.01262	-1.39713	1.30327	0.16214	-0.26698	1.78306	1.07123	0.3711	1.23359	-0.32276	0.221	0.13002	0.22469	0.57004	1.38853				82.7	2.6389	5.06789	4.06989	5.28541	5.29742	2.97724	3.30242	3.45419
	82.8	14.4247	12.6973	11.4045	11.8693	10.3154	9.69478	13.2782	13.2354	12.1635	11.1209	12.7761	11.2829	13.3884	11.756	9.56096	10.4123				82.8	-0.61219	0.2474	-0.26385	0.94587	-0.48125	-1.08189	0.59618	1.10394	0.73691	0.98109	-0.35286	-0.42455	0.95442	-0.22762	0.5946	1.12318				82.8	2.1901	4.95202	4.6005	4.37097	5.34813	2.13896	3.26699	3.45932
	82.9	14.4659	12.5084	11.6449	11.2906	9.92669	9.67118	12.6781	12.8633	11.5448	10.5035	12.3772	11.5645	12.808	12.3655	9.00995	10.6582				82.9	-0.84977	-0.08735	0.88118	0.46785	-0.71531	-1.22368	-0.45168	0.51996	0.65899	0.94459	-0.38319	-0.82645	1.3947	-0.56879	0.32249	0.8506				82.9	1.82929	5.50922	4.59595	3.42459	4.69197	2.71821	3.32656	4.2262
	83	14.7037	11.9568	11.4299	11.08	9.84869	9.61744	11.8772	12.1902	10.8565	10.0852	12.1761	11.9294	11.975	12.5006	9.45819	11.0134				83	-1.06051	0.48624	1.3739	-0.08563	-0.1546	-0.79938	-0.71766	0.00665	0.11504	0.96041	-0.12372	-0.6686	1.70314	-0.71237	0.16171	0.74707				83	1.38929	6.13551	4.36618	2.70344	3.86704	4.28625	3.29146	4.75422
	83.1	14.6261	11.3864	11.0691	11.3906	10.0901	9.58302	11.1222	11.9326	10.4217	9.87371	12.4988	11.8269	11.554	12.1275	10.3898	11.2646				83.1	-1.57403	1.41114	0.85245	-0.33816	0.74106	-0.57754	-0.24313	0.31403	-0.80205	0.96168	0.33203	-0.18262	2.0147	-1.02788	-0.04448	0.91095				83.1	1.08856	6.04082	3.74415	2.1847	3.62119	5.44378	3.13611	4.34174
	83.2	13.9398	11.1994	11.053	11.9083	10.2449	9.49297	10.8384	11.868	10.3717	9.78222	13.2646	11.5112	11.8325	11.5304	11.0104	11.3111				83.2	-2.25173	1.43116	-0.15388	-0.11321	1.24212	-0.68615	0.25744	1.13609	-1.45518	0.91987	0.65104	0.2056	2.02288	-1.34014	-0.68142	1.2106				83.2	1.28936	5.32586	2.4728	2.10229	4.14809	5.62002	2.59413	3.62877
	83.3	13.081	11.5472	11.1626	12.0104	9.66441	9.17446	10.9578	11.5932	10.6156	9.86774	13.8278	11.5245	12.353	11.0401	11.3809	11.335				83.3	-2.61421	0.22585	-0.7927	0.27584	1.06926	-0.51127	0.3623	1.58812	-1.2608	0.7174	0.76341	0.2131	1.76887	-1.20982	-1.41771	1.34828				83.3	1.73979	4.52206	1.57435	2.45803	5.04852	5.18917	1.77449	3.72169
	83.4	12.7794	12.1628	11.1682	11.3793	8.69836	8.83196	11.1819	11.4274	10.6129	9.86928	13.8939	11.9907	12.7216	10.7709	11.7678	11.4431				83.4	-2.4582	-1.1195	-1.04379	0.4514	0.59271	0.08628	0.30708	1.4605	-0.62939	0.40923	0.76735	-0.09772	1.26126	-0.73876	-1.48805	1.12885				83.4	2.10768	3.72217	2.14981	2.90958	5.57884	4.53413	1.49187	4.64355
	83.5	13.1109	12.7104	11.1847	10.5206	8.61326	9.05332	11.626	11.7903	10.2388	9.63449	13.645	12.6279	13.0991	10.6749	12.1107	11.5547				83.5	-2.23153	-1.51081	-1.1782	0.18109	0.31178	0.47216	0.16763	1.18865	-0.15947	0.05755	0.84168	-0.56639	0.61604	-0.12737	-0.64618	0.55341				83.5	2.47368	3.10583	3.50674	3.315	4.97192	3.86033	2.19084	5.44455
	83.6	13.695	12.7924	11.2462	10.2723	9.77149	9.78031	12.621	12.1089	10.2738	9.4265	13.1509	13.1835	13.6169	10.7525	12.3773	11.5115				83.6	-2.24592	-0.94589	-0.95145	-0.35197	0.18201	0.23991	-0.1936	1.10294	0.24977	-0.51367	1.00078	-0.95331	0.30617	0.54729	0.38208	-0.18827				83.6	2.74517	3.176	4.26828	3.58649	3.41507	3.50321	3.0688	5.45302
	83.7	14.2851	12.2136	11.0313	10.4944	11.105	10.4509	14.0252	11.595	11.1879	9.45902	12.6205	13.7035	14.0131	11.1895	12.3405	11.3073				83.7	-2.03468	-0.18578	-0.16252	-0.64565	0.11534	-0.29286	-0.61637	1.01828	0.49215	-0.99166	0.90965	-0.98748	0.23455	0.82547	0.71572	-0.77093				83.7	2.79553	3.95881	4.10054	3.74556	2.13809	3.84647	3.32433	4.9418
	83.8	14.7822	11.33	10.3938	10.3483	11.5966	10.8693	15.0845	10.7841	12.4678	9.73676	12.4562	14.1307	13.9597	11.9076	11.8753	11.1271				83.8	-1.26694	0.22404	0.86627	-0.49006	0.28121	-0.5723	-0.82721	0.6083	0.19082	-0.87078	0.57297	-0.79788	0.02644	0.5271	0.60799	-0.93252				83.8	2.92725	4.90344	3.67053	4.06806	2.091	4.7331	3.18096	4.64072
	83.9	15.334	10.6127	10.062	10.0719	11.3146	10.9957	15.0542	10.943	13.1188	9.98648	12.5958	14.2083	13.7274	12.5964	11.4685	11.2492				83.9	-0.28678	0.23391	1.5486	-0.22523	0.56628	-0.50237	-0.7457	0.03508	-0.43979	-0.35367	0.29223	-0.73952	-0.11245	0.25447	0.56126	-0.52125				83.9	3.50662	5.19905	3.5985	4.52689	3.04385	5.49504	3.09075	4.73111
	84	15.9411	10.3496	10.6967	10.335	10.8217	10.6813	13.9212	12.2142	12.5478	9.69931	12.6768	13.8851	13.9437	13.1503	11.4901	11.5755				84	0.57985	0.14688	1.5869	-0.24154	0.69758	-0.45718	-0.35932	-0.38878	-0.95121	0.27852	0.12682	-0.84507	-0.04687	0.41974	0.51812	0.23488				84	4.25642	4.45946	3.81323	4.64102	4.14153	5.74794	3.21099	4.85072
	84.1	16.2236	10.718	11.6435	10.5792	10.5245	10.0803	12.5701	13.5744	11.2957	8.68567	12.7175	13.2585	14.3486	13.5033	11.7196	11.4753				84.1	1.21077	0.12101	1.2584	-0.35297	0.72678	-0.57193	0.23683	-0.70761	-1.02305	0.92251	0.1682	-0.94956	-0.14109	0.59809	0.53712	0.69343				84.1	4.2392	3.31519	3.9588	4.23434	4.62895	5.4627	3.55342	4.62123
	84.2	16.0746	11.6126	11.7507	10.3036	10.5265	9.53549	12.1659	14.0031	10.3231	7.62922	12.9407	12.4513	14.0845	13.5541	11.8982	10.8291				84.2	1.3797	-0.0187	0.80348	-0.20739	0.80436	-0.48618	0.59899	-1.06561	-0.44771	1.21923	0.36203	-0.87395	-0.59328	0.28616	0.61331	0.55901				84.2	3.27112	2.80385	3.77086	3.78803	4.3545	4.52123	4.0418	4.08192
	84.3	15.5969	12.4181	11.1401	9.94345	10.7492	9.36702	12.9294	13.2466	9.92822	7.39591	13.3655	11.7602	13.1602	13.2956	11.8526	10.1824				84.3	0.8618	-0.16817	0.2092	0.06749	0.91427	0.08095	0.50894	-1.2721	0.47858	0.96753	0.3976	-0.55098	-0.93008	-0.18193	0.60524	0.04386				84.3	2.41046	3.21932	3.04921	3.80199	3.82858	3.21515	4.58373	3.75978
	84.4	14.7148	12.3325	10.9229	9.68009	11.0877	9.71981	13.9937	11.8986	9.97705	7.85892	13.7745	11.4685	12.2689	12.8585	11.5675	9.9149				84.4	-0.13489	0.11981	-0.32593	0.09909	0.92809	0.87055	0.20236	-1.12844	1.0291	0.38356	0.48192	-0.27907	-0.58683	-0.12735	0.52598	-0.46354				84.4	2.25458	3.98844	2.20673	4.23115	3.38193	2.42693	4.94788	3.83912
	84.5	13.7178	11.4009	11.381	9.41996	11.2002	10.1974	14.462	10.8907	10.4174	8.41909	13.9685	11.6273	11.6597	12.5068	11.3393	10.0278				84.5	-0.85715	0.9214	-0.62855	-0.22017	0.8652	1.35153	-0.08113	-0.78783	0.85952	-0.27288	0.7728	-0.33703	0.34177	0.24824	0.28502	-0.64996				84.5	2.34558	4.58227	1.96503	4.75997	3.16489	2.50732	4.88488	4.01968
	84.6	13.0703	10.6706	11.7249	9.42011	10.9008	10.2798	14.0325	10.6461	11.0521	8.99246	13.9313	12.1448	11.1885	12.3484	11.2644	10.2693				84.6	-0.97456	1.49231	-0.77004	-0.76193	0.89519	1.11677	-0.13053	-0.27754	0.35331	-0.76564	0.82002	-0.65426	1.11623	0.39055	-0.123	-0.60693				84.6	2.39789	4.82216	2.27584	5.00834	3.23375	3.07141	4.89035	4.13501
	84.7	12.9416	10.7125	11.5389	9.77714	10.5035	9.97616	13.1648	11.0811	11.358	9.40512	13.7527	12.6532	11.127	12.2086	11.1537	10.2721				84.7	-0.90513	1.2758	-0.75927	-1.28761	1.0033	0.17183	0.07162	0.4512	0.05503	-0.70388	0.62676	-0.97821	1.06041	0.43682	-0.41553	-0.59615				84.7	2.81512	4.60507	2.7206	4.4255	3.28077	3.87681	5.34055	4.13097
	84.8	13.4686	11.1181	11.1622	10.2193	10.3008	9.70912	12.5866	12.1862	11.2218	9.28362	13.6236	12.8591	11.7077	11.937	10.882	9.89283				84.8	-0.90496	0.63556	-0.52499	-1.35881	1.21746	-0.94402	0.24111	0.97222	-0.0255	0.0439	0.70532	-0.79799	0.48389	0.58357	-0.53857	-0.51008				84.8	3.63344	3.93901	3.35616	3.01608	3.41438	4.5825	5.33596	4.01894
	84.9	14.5946	11.5511	10.9981	10.5256	10.3203	9.44019	12.4117	13.4856	10.9744	8.81662	13.8768	12.9332	12.4076	11.5994	10.5808	9.47104				84.9	-0.93828	-0.05246	0.01411	-0.71441	1.65523	-1.50486	0.22624	0.92132	-0.24796	0.89062	1.02925	0.17804	0.30738	0.57155	-0.6409	-0.05904				84.9	4.17998	3.19455	4.28166	1.85548	4.02967	4.71173	4.45776	3.7346
	85	15.6954	12.0937	11.303	10.5448	10.568	8.80901	12.4268	13.9347	10.7141	8.37059	14.401	13.0169	12.6816	11.3453	10.5412	9.63708				85	-1.04256	-0.64085	0.75026	0.30924	1.96818	-1.2189	-0.0705	0.55524	-0.65046	1.21092	1.10316	1.30985	0.60506	0.27761	-0.70562	0.75685				85	4.25946	2.99884	5.04198	1.82942	4.75232	4.60541	3.75712	2.96372
	85.1	16.0386	12.4769	11.8256	10.3405	10.8574	8.27953	12.4706	13.3177	10.5574	8.08211	14.5207	13.0078	12.5256	11.2727	10.37	10.4154				85.1	-1.20852	-0.77235	1.26334	0.90985	1.7342	-0.30776	-0.64781	0.32211	-1.00353	1.04378	0.75704	1.71928	0.79825	0.20858	-0.75306	1.36346				85.1	4.40803	3.49243	5.15829	2.64172	5.00012	4.6978	3.72759	1.94755
	85.2	15.6661	12.4091	11.9518	10.2673	10.8036	8.36144	12.2314	12.3451	10.632	8.07957	13.9591	12.9107	12.2314	11.4845	9.39022	11.1569				85.2	-1.24373	-0.3988	1.225	0.59428	0.98028	0.52237	-0.90832	0.35903	-1.24159	0.8308	0.31815	1.28083	0.72328	0.83383	-0.84643	1.54359				85.2	4.97612	3.96079	4.74943	3.54863	4.90172	4.77261	3.72018	1.55575
	85.3	15.3008	12.5662	11.3626	10.5162	10.4312	8.73536	11.8666	11.8856	11.03	8.41338	13.1094	12.6424	12.0501	11.9863	8.32562	11.6175				85.3	-1.17553	-0.14693	0.88923	-0.20991	0.10167	0.55105	-0.41844	0.42948	-1.16353	0.77744	0.30999	0.43748	0.53956	1.58337	-0.89627	1.78553				85.3	5.4489	3.92954	4.12855	4.20522	4.78566	4.79046	3.30465	2.10083
	85.4	15.4691	13.4505	10.2809	11.0633	10.215	9.08794	11.9048	12.2303	11.7109	8.93049	12.3151	12.055	12.0896	12.4531	8.58751	12.0033				85.4	-1.29842	-0.25026	0.62373	-0.7419	-0.40555	-0.09212	0.30715	0.28727	-0.42628	0.57155	0.93423	-0.28734	0.33904	1.53735	-0.91683	2.05415				85.4	4.84486	3.66624	3.47872	4.72836	4.94482	4.82687	2.93594	3.0543
	85.5	16.0433	14.1943	9.40823	11.8344	10.3208	9.37896	12.2019	12.5183	12.1335	9.49138	11.697	11.5149	12.5278	12.5632	10.1959	12.3349				85.5	-1.52184	-0.209	0.29961	-0.83345	-0.36021	-0.56584	0.57865	-0.09223	0.70461	-0.000600396	1.66916	-0.55114	0.09599	0.67743	-1.17937	1.80333				85.5	3.08489	3.25493	3.10674	5.18864	5.43564	4.64629	3.07681	3.84715
	85.6	16.1529	13.9417	9.25717	12.5988	10.5826	9.43241	12.4143	11.8507	11.5749	9.86254	11.3573	11.5654	13.1481	12.3814	11.8008	12.448				85.6	-1.35639	0.0904	-0.10392	-0.90871	0.01698	-0.3623	0.17697	-0.44764	1.495	-0.48702	1.82204	-0.44297	-0.07359	-0.16731	-1.57234	1.11552				85.6	1.30711	2.77289	3.29027	5.35539	5.57423	4.31072	3.56221	4.22291
	85.7	15.2316	13.1808	9.60188	12.8986	10.955	9.1075	12.6124	10.823	10.1977	9.81447	11.3828	12.0544	13.4895	12.1074	12.4333	12.3128				85.7	-0.82037	0.15282	-0.17287	-1.16919	0.30896	0.20188	-0.62999	-0.42427	1.62279	-0.38904	1.47519	-0.33981	0.18631	-0.22913	-1.56188	0.61871				85.7	0.66759	2.62567	3.74606	5.10452	4.93375	4.27886	4.15826	4.51471
	85.8	13.8876	12.9451	10.0459	12.3681	11.2723	8.72794	12.9838	10.4695	9.30485	9.52824	11.8268	12.2552	13.442	11.8547	12.3461	12.1236				85.8	-0.55201	-0.17284	0.25571	-1.24469	0.28307	0.44206	-1.37719	-0.04766	1.41981	0.02828	1.23949	-0.53544	0.76856	0.22517	-1.23449	0.57283				85.8	1.07763	2.88129	3.89245	4.78256	4.11912	4.60037	4.64128	5.03604
	85.9	13.1204	13.2414	10.7155	11.326	11.0242	8.87336	13.5838	10.5688	9.75574	9.26459	12.6318	11.9645	13.033	11.6724	11.9564	11.8852				85.9	-0.86626	-0.35977	0.90535	-0.87925	0.09075	0.16696	-1.68041	0.30056	1.29303	0.27938	1.19232	-0.96776	0.94822	0.45155	-1.01772	0.51867				85.9	1.54083	3.33233	3.58635	4.68395	3.66737	4.81076	4.68685	5.24743
	86	13.4207	13.4056	11.5155	10.6992	10.1297	9.73547	14.1804	10.4307	10.934	9.03567	13.3954	11.6256	12.5036	11.4805	11.5084	11.4247				86	-1.28174	-0.31226	1.3338	-0.35149	0.1899	-0.24968	-1.35269	0.30465	1.18603	0.21613	0.98113	-1.14485	0.48727	0.34697	-0.95932	0.13356				86	1.7185	3.76005	3.26018	4.63839	3.44063	4.60398	4.0944	4.69597
	86.1	14.3316	13.5475	11.6607	10.9453	9.2905	10.7986	14.3331	10.4116	12.0264	9.15665	13.4941	11.5182	12.2345	11.2802	11.4332	10.8939				86.1	-1.17409	-0.78177	1.21953	0.05791	0.85277	-0.47559	-0.72082	0.00936	0.94362	-0.20006	0.77842	-0.86952	0.0589	0.228	-0.94882	-0.14779				86.1	2.18938	4.17628	3.36262	4.43419	3.06448	4.22959	3.07065	4.04213
	86.2	14.6484	13.9487	11.1066	11.5473	9.01158	11.1366	13.8442	11.1197	12.8216	9.88622	12.7497	11.8401	12.2608	11.5154	11.8546	10.5916				86.2	-0.69513	-1.63501	0.79115	0.56599	1.67613	-0.35916	-0.43303	-0.26518	0.59941	-0.73952	0.97983	-0.56815	0.25849	0.13569	-0.77144	0.06771				86.2	3.15276	4.58481	3.67583	4.01033	2.48603	4.20675	2.36006	4.13021
	86.3	13.8871	14.1245	10.8683	11.7109	9.27974	10.385	13.0367	11.8021	13.018	10.6599	11.6294	12.6233	12.3449	12.3995	12.3241	10.5533				86.3	-0.60685	-1.73195	0.63857	1.24407	1.83193	0.00080196	-0.53139	-0.26528	0.03268	-0.86363	1.32949	-0.56642	0.96464	-0.19786	-0.15703	0.5249				86.3	3.83362	4.40294	3.64552	3.47238	2.09555	4.61054	2.5687	4.71926
	86.4	12.8605	13.5968	11.1172	10.9776	9.85903	9.0156	12.2959	11.6417	12.5003	10.6901	10.7477	13.1715	12.3216	13.2927	12.4564	10.6182				86.4	-0.94199	-0.77779	0.74611	1.49132	1.21806	0.30948	-0.40124	0.20218	-0.54441	-0.48771	1.41715	-0.7608	1.63604	-0.5455	0.82452	0.84323				86.4	3.70474	3.70509	3.3696	3.03229	2.20346	5.09049	3.44832	5.17603
	86.5	12.5055	12.3528	11.1483	9.67595	10.3447	7.85141	11.8468	11.1317	12.0018	10.0522	10.373	12.8516	12.2108	13.6406	12.3215	10.7232				86.5	-0.96166	0.38416	0.43104	1.054	0.69212	0.39347	0.19379	1.0238	-0.61467	0.03836	1.22698	-0.79617	1.69371	-0.30701	1.63008	1.09388				86.5	3.29889	3.51439	3.40845	2.86609	2.48684	5.11555	4.40952	5.28625
	86.6	12.9876	10.7413	10.9942	8.73274	10.772	7.69998	11.9377	10.7753	12.0183	9.4451	10.4514	12.018	11.9989	13.5507	12.0893	11.0358				86.6	-0.58527	0.94113	-0.41145	0.31824	0.8128	0.22913	0.71011	1.67246	-0.46442	0.4827	0.83603	-0.54192	0.9454	0.32937	1.84376	1.39917				86.6	3.46479	3.95816	3.91504	2.97254	2.50093	4.57751	4.99288	4.9
	86.7	13.9983	9.56054	11.2269	8.6465	11.5149	8.62404	12.5361	10.4624	12.1002	9.16013	11.074	11.1891	11.6349	13.1872	11.7641	11.4879				86.7	-0.17205	0.85619	-0.98487	-0.43961	1.14796	-0.07906	0.56736	1.71924	-0.56487	0.55006	0.42763	-0.45281	0.16273	0.73329	1.6234	1.49841				86.7	4.26415	4.39709	4.68808	3.1428	2.45388	4.18684	4.88628	4.17106
	86.8	15.0896	9.36124	11.7654	9.20006	12.3477	9.60744	13.3222	10.213	11.9246	9.09377	12.3097	10.476	11.4793	12.7807	11.3868	11.5892				86.8	0.27451	0.5101	-0.96578	-1.00853	1.0733	-0.13391	-0.11725	1.10644	-0.54945	-0.01939	0.22202	-0.90428	0.22346	0.80762	1.307	1.09472				86.8	4.9576	4.50103	5.37606	3.38762	2.88434	4.16013	4.10263	3.84469
	86.9	15.5201	9.96976	12.03	10.1001	12.6183	9.57213	13.966	10.2857	11.6069	9.24566	13.8477	10.0631	11.8951	12.6819	10.9529	10.9388				86.9	0.6607	0.35584	-0.75837	-1.12817	0.68566	0.32385	-0.73856	0.15246	-0.1967	-0.89963	0.02792	-1.34737	0.73458	0.6094	0.98258	0.43545				86.9	4.97485	4.30268	5.88806	3.79754	3.78555	3.88705	3.13523	4.16748
	87	14.903	10.9264	11.7751	10.9811	12.2807	8.71608	14.1393	10.413	11.4596	9.765	15.0505	10.2152	12.7404	12.8155	10.444	9.79401				87	0.79585	0.62248	-0.42979	-0.6957	0.36569	1.00866	-0.88225	-0.63689	0.00287	-1.50477	-0.33247	-1.205	0.78561	0.20346	0.39811	0.08578				87	4.35574	3.97283	6.15707	4.24312	4.38954	3.61458	2.62022	4.37389
	87.1	14.0139	11.7589	11.2312	11.3029	11.8463	8.14819	13.649	10.0996	11.725	10.6733	15.2069	10.8049	13.4815	12.799	10.0543	9.01716				87.1	0.7522	0.7361	0.14868	0.04174	0.17603	1.47296	-0.3692	-0.81025	0.01371	-1.53357	-0.65278	-0.79813	0.3494	-0.0225	-0.50031	-0.06719				87.1	3.8471	3.61761	5.68217	4.39318	4.20736	4.06264	2.87323	4.0765
	87.2	13.8308	12.2341	10.6116	11.1121	11.5031	8.19266	12.8042	9.6882	12.0345	11.6953	14.4556	11.5108	13.5247	12.5752	10.0146	9.18183				87.2	0.68718	0.26479	0.72033	0.47389	0.11036	1.30714	0.44075	-0.26825	0.27552	-0.98894	-0.75656	-0.52079	-0.00107	0.18011	-1.32422	-0.53307				87.2	4.13409	3.17089	4.61058	3.74978	3.78756	4.72788	3.70796	3.76557
	87.3	14.3753	12.5443	9.72874	10.7995	11.1114	8.18417	12.1762	9.65632	11.8648	12.4742	13.7438	12.1897	12.9696	12.3703	10.3963	9.84379				87.3	0.68135	-0.20512	1.09648	0.31031	0.1523	0.49045	0.62083	0.30631	0.76186	-0.22886	-0.53716	-0.44914	-0.01023	0.67705	-1.4478	-1.09894				87.3	4.83115	2.66031	3.98515	2.71902	3.49406	4.97186	4.5945	3.72343
	87.4	15.0514	12.7551	8.74225	10.1607	10.8555	7.73091	11.9874	10.0045	11.3366	12.6329	13.3579	12.7828	12.2908	12.3398	11.1158	10.2757				87.4	0.70749	0.04459	1.27485	-0.16526	0.13049	-0.23539	0.04395	0.22238	1.16747	0.15504	0.03514	-0.62544	0.04777	1.27841	-0.60798	-1.04939				87.4	5.06926	2.31508	4.1365	2.45698	3.1828	5.25318	5.26849	3.60181
	87.5	15.34	12.683	8.5238	9.11185	10.9125	7.27285	12.0018	10.6262	11.1369	11.8898	13.0086	13.2119	11.4612	12.466	11.9107	10.41				87.5	0.6136	0.87367	1.1335	-0.61373	0.09452	-0.3255	-0.51168	-0.182	1.32794	-0.12159	0.81213	-0.64271	-0.12763	1.6432	0.48494	-0.34527				87.5	4.84661	2.55763	4.40796	3.15909	3.00701	5.76877	5.86074	2.99371
	87.6	14.9701	12.6087	9.39547	8.46833	10.7274	7.13639	11.947	11.0958	11.7061	10.5949	12.9339	13.4029	10.4974	12.6404	12.5054	10.4185				87.6	0.25177	1.41732	0.92841	-0.752	0.19499	-0.11472	-0.59717	-0.25677	1.28824	-0.72146	1.19747	-0.12969	-0.31425	1.51047	0.93754	0.23792				87.6	4.5388	3.48927	4.23108	4.10785	3.00277	6.01137	6.13534	2.05633
	87.7	14.034	13.02	10.5484	8.74579	9.96522	7.07163	11.8383	11.0343	12.514	9.4094	13.3443	13.367	9.85067	12.9629	12.8267	10.2654				87.7	-0.20708	0.9716	1.23545	-0.52886	0.51546	0.05644	-0.34315	-0.0033	1.1581	-0.9863	0.64796	0.32032	-0.28163	1.1146	0.75714	0.38905				87.7	3.9303	4.14926	3.66247	4.53567	2.85482	5.59715	5.66673	1.35965
	87.8	13.241	13.884	11.0694	9.55712	9.69862	6.97752	12.0201	10.8682	12.7318	8.71832	13.5647	13.2701	9.90924	13.314	12.6537	10.1695				87.8	-0.32993	-0.03538	1.78494	-0.13054	0.9314	0.21591	0.09539	0.31132	0.91327	-0.8069	-0.26473	0.01636	-0.2224	0.80418	0.36609	0.47916				87.8	2.88063	3.59152	3.41819	4.0258	2.61822	4.30838	5.18975	1.19737
	87.9	13.1905	14.497	10.8782	10.3451	10.6993	7.10933	12.6805	11.1681	12.3592	8.85391	13.1223	13.344	10.5587	13.13	11.9422	10.381				87.9	-0.1167	-0.7049	1.83415	0.28899	1.19464	0.34852	0.60967	0.65424	0.4544	-0.73756	-0.67377	-0.67009	-0.1934	0.7396	0.01282	0.54429				87.9	2.06906	2.57717	3.55112	3.07436	2.51816	2.71183	5.56394	1.5273
	88	13.5246	14.2826	10.6009	10.7434	11.8482	7.57634	13.445	11.8453	11.836	9.76023	12.7231	13.6751	11.3059	12.3426	11.2027	10.8868				88	0.00279	-1.04253	1.24673	0.41904	1.1945	0.45934	0.80312	1.08289	-0.27153	-0.89146	-0.52438	-0.76397	-0.07769	0.84871	-0.12995	0.43423				88	2.09938	2.35849	3.20821	2.69049	2.43756	2.11585	6.1546	2.4093
	88.1	13.7321	13.6509	10.8014	10.5565	12.1113	8.2784	13.7471	12.5046	11.7578	10.686	12.9418	13.7699	11.7934	11.6481	10.7443	11.7478				88.1	-0.19576	-1.18277	0.36445	0.04677	0.98122	0.40527	0.45463	1.6567	-0.95597	-0.79842	0.02147	-0.04717	0.02972	0.83367	0.07936	0.43291				88.1	2.57933	2.71289	2.60331	3.36751	2.4619	2.90521	6.14514	3.81262
	88.2	13.7725	13.2754	11.5349	9.91467	12.006	9.17496	13.6565	12.9309	12.6112	10.9352	13.2193	13.2509	11.953	11.4882	10.5567	12.6905				88.2	-0.61536	-0.78813	-0.27048	-0.26924	0.69169	0.11352	0.19676	2.18997	-1.19867	-0.43643	0.63633	0.82736	-0.11104	0.55109	0.61028	0.64456				88.2	2.89449	2.91721	2.64973	4.56829	3.00992	4.19591	5.64773	5.11396
	88.3	13.7361	13.2536	12.4087	9.46632	12.0331	9.78158	13.6697	12.9389	13.5961	10.3876	12.9095	12.7057	11.9642	11.5803	10.7199	12.8533				88.3	-0.9728	-0.09299	-0.3128	0.08196	0.37356	-0.06188	0.52917	2.05233	-1.24672	-0.15804	0.69631	1.29707	-0.46715	0.17827	1.18885	0.75701				88.3	2.8647	3.21882	2.87277	5.24476	4.0126	5.07472	4.84903	5.62839
	88.4	13.815	13.4681	12.8762	9.58745	11.9302	9.26386	13.7491	12.4236	13.5541	9.67646	12.2007	12.5778	11.9305	11.4784	11.0943	12.1368				88.4	-1.08567	0.0804	-0.13201	0.68288	-0.05574	0.08742	0.93374	1.17956	-1.44184	-0.00643	0.25656	1.31494	-0.68509	0.00276	1.55384	0.81995				88.4	2.64399	4.05832	2.64205	5.08349	4.81674	5.14633	4.24482	5.29275
	88.5	14.1226	13.6954	12.7034	9.92087	11.5364	7.9246	13.614	11.7907	12.834	9.65581	11.9078	12.5628	11.7894	11.0365	11.1327	11.4383				88.5	-1.10954	-0.57148	-0.17561	0.90953	-0.47635	0.45717	0.89581	0.5795	-1.45721	0.07595	-0.11353	1.13448	-0.79884	0.17662	1.56847	0.94285				88.5	2.4958	5.13753	2.66988	4.50316	4.87321	4.39249	4.59282	4.54365
	88.6	14.327	13.6727	12.3289	10.3135	10.8917	7.11454	13.4344	11.7256	12.3207	10.1384	12.4545	12.5832	11.5248	10.601	10.5966	10.9932				88.6	-0.95897	-1.56786	-0.16771	0.92871	-0.50574	0.88306	0.45134	0.79647	-0.94375	0.03837	-0.2706	0.94862	-1.11032	0.58905	1.14619	0.76956				88.6	2.37531	5.8232	3.46185	3.67834	4.16089	3.25494	5.81567	4.05122
	88.7	14.2847	13.6963	12.4586	10.6879	10.241	7.50512	13.2818	12.4151	12.3034	10.287	13.2652	12.9291	11.1319	10.5532	10.1072	10.4617				88.7	-0.38383	-2.32848	0.26225	0.99921	-0.09668	1.17162	-0.22021	1.19922	-0.11125	-0.15977	-0.28435	0.52444	-1.24236	0.86401	0.40935	0.32499				88.7	2.13464	5.76284	4.30134	2.84357	3.26636	2.68248	6.85727	4.27115
	88.8	14.3582	14.0277	13.054	10.5367	10.2656	8.44042	13.0404	13.3502	12.6282	10.0672	13.6547	13.364	10.83	10.7342	10.4159	10.1422				88.8	0.18616	-2.56921	0.72158	0.83079	0.30076	1.18987	-0.66722	1.12796	0.50794	-0.33908	-0.14121	-0.15849	-0.64732	0.78712	-0.11241	0.02141				88.8	1.80478	5.07877	4.40385	2.51531	2.69109	3.21325	6.81738	4.76369
	88.9	14.5894	14.3602	13.3266	9.9491	11.0904	9.027	12.8765	13.8504	12.8971	9.84276	13.4045	13.2069	10.8167	10.9912	11.378	10.4759				88.9	0.09734	-2.13751	0.78518	0.15497	0.27099	0.8913	-0.50842	0.45737	0.6661	-0.43991	0.12345	-0.47128	0.42311	0.52424	-0.01057	-0.28378				88.9	1.81335	4.30309	3.99848	2.87173	2.38729	4.20606	6.1717	4.33777
	89	14.8349	14.4637	12.9353	9.71609	11.9285	9.12429	12.805	13.4771	12.7821	9.62173	12.6804	12.4332	10.9055	11.3164	12.1239	11.1422				89	-0.58753	-1.11562	0.70518	-0.60162	-0.2459	0.3127	-0.13384	-0.38715	0.53471	-0.80072	0.4849	-0.24034	1.27725	0.37054	0.2163	-0.61464				89	2.71734	3.74242	3.93718	3.4402	2.34292	4.88858	5.92291	2.89528
	89.1	15.0392	14.2256	12.0211	10.2429	12.3432	9.03834	12.5697	12.2026	12.4485	9.43458	12.137	11.935	10.9769	11.4094	12.1399	11.4315				89.1	-1.31336	-0.07965	0.7324	-0.9481	-0.82944	-0.20944	0.01763	-0.8196	0.33334	-1.18302	0.71684	-0.0251	1.46393	0.52605	0.00362	-0.48524				89.1	4.01526	3.3476	4.52217	3.56909	2.71353	5.02749	5.9031	1.87472
	89.2	14.9542	13.5699	10.9179	11.1061	12.5396	8.74382	12.2944	10.8802	12.1933	9.19724	12.2218	12.3725	11.1096	11.3134	11.9184	11.2125				89.2	-1.41534	0.38411	0.7864	-0.97671	-1.00934	-0.1347	0.01613	-0.82002	0.29371	-0.90801	0.52797	0.05791	1.16268	0.80322	-0.3278	0.00723				89.2	4.53997	3.10649	5.28799	3.16947	3.34184	4.38625	5.42352	2.18124
	89.3	14.4964	12.6584	10.3365	11.5655	12.5073	8.29244	12.4273	10.6155	11.8756	8.63252	12.7695	13.3312	11.2429	11.5584	12.1472	10.9557				89.3	-0.68184	0.20232	0.73296	-0.74346	-0.82945	0.41665	-0.20745	-0.57883	0.45337	-0.32356	0.27359	0.25204	0.9754	0.88541	-0.37843	0.1818				89.3	4.12037	2.92142	5.66169	2.59506	3.86306	3.09078	4.55612	3.21969
	89.4	13.8055	11.807	10.5236	11.4193	12.0053	8.36396	12.9674	11.1339	11.4023	8.28903	13.7037	13.8426	11.1776	12.0704	12.633	10.8326				89.4	0.20558	-0.35389	0.58071	-0.20361	-0.47447	0.70391	-0.7333	-0.20782	0.49604	-0.13087	0.38897	0.3366	0.94273	0.76496	-0.31797	-0.0944				89.4	3.57639	2.50383	5.31956	2.3488	4.15584	2.03658	3.87301	4.01823
	89.5	13.1152	11.2481	10.9247	10.9638	11.0668	9.30578	13.3384	11.1492	11.2403	8.85557	14.9054	13.8048	10.94	12.2976	12.6742	10.4145				89.5	0.50597	-0.97892	0.46462	0.21966	0.05367	0.48829	-1.29086	-0.13037	0.45177	-0.17379	0.59529	0.05757	0.43303	0.51373	-0.51805	-0.3871				89.5	3.3946	2.04356	4.66345	2.88424	4.50493	2.11417	3.81117	4.43159
	89.6	12.7046	11.0492	10.9489	10.4355	10.2058	10.4053	13.2424	10.4471	11.8027	9.63328	15.5683	13.9222	10.7103	12.3453	12.2612	9.79478				89.6	0.18235	-1.24452	0.45706	0.18741	0.51353	0.20565	-1.64369	-0.40157	0.68527	-0.01301	0.53483	-0.34487	-0.58622	0.20099	-1.00886	-0.61337				89.6	3.36502	2.17751	4.38931	4.0558	5.14953	3.10989	4.33371	4.70285
	89.7	12.6925	11.3209	10.5094	9.89646	9.87036	10.9875	12.8817	9.92991	12.5677	9.73268	15.0887	14.2831	10.5887	12.7051	11.9981	9.775				89.7	-0.36777	-0.84958	0.45961	0.08033	0.53106	0.23852	-1.6061	-0.45171	1.1589	0.55729	0.33385	-0.42702	-1.2057	0.13511	-1.47536	-0.92105				89.7	3.31861	2.8187	4.40262	5.17261	5.50234	4.2241	5.05233	4.55456
	89.8	12.9327	11.8909	10.1673	9.34732	10.0187	10.9096	12.4452	9.88593	12.6257	9.34889	14.1003	14.5362	10.8922	13.1762	12.0135	10.4559				89.8	-0.87013	-0.18999	0.26257	0.32971	0.12557	0.42433	-1.20077	-0.20993	1.56482	0.99063	0.22716	-0.31119	-0.99893	0.47974	-1.46324	-1.23215				89.8	3.1248	3.40685	4.22566	5.74751	4.91259	5.21967	5.73514	4.18338
	89.9	13.1874	12.0093	10.4515	9.09601	10.3196	10.1782	12.1239	9.97509	11.8108	9.16267	13.5603	14.7309	11.6514	13.199	11.9593	11.2048				89.9	-1.25493	0.11247	-0.11418	0.65966	-0.39584	0.60915	-0.86235	-0.15653	1.59784	0.47823	0.2779	-0.48257	-0.56404	0.92582	-0.81539	-1.37874				89.9	2.63898	3.98828	3.96322	5.83994	3.84168	5.97415	6.15698	4.26595
	90	13.2989	11.304	11.2244	9.58226	10.1938	9.16176	12.089	10.1919	10.7372	9.67127	13.5614	14.9453	12.2658	12.7902	11.6994	11.7567				90	-1.38855	0.02396	-0.18781	0.63477	-0.81107	1.03937	-0.78678	-0.37196	1.12624	-0.46673	0.68692	-0.64585	-0.60138	1.1687	-0.162	-1.05413				90	2.22373	4.83885	3.64102	5.91652	3.29578	6.07844	5.85337	4.65539
	90.1	13.1928	10.2603	12.1387	10.5277	9.5426	8.45544	12.31	10.5906	10.2851	10.7192	13.7304	14.6684	12.3025	12.3822	11.357	12.1277				90.1	-1.10341	-0.27662	0.25838	0.29612	-0.92	1.51553	-0.74543	-0.40772	0.55098	-0.92616	1.47733	-0.33836	-1.10458	1.13164	-0.1114	-0.07743				90.1	2.28134	5.57095	3.10831	6.14606	3.54411	5.51309	4.83889	4.97127
	90.2	13.0045	9.67423	12.7067	11.2621	9.32056	8.17874	12.5403	10.9524	10.9698	11.4919	13.926	13.6017	12.0646	12.086	11.2228	12.2312				90.2	-0.44219	-0.66504	0.65983	-0.02713	-0.38708	1.30633	-0.57271	-0.06992	0.51175	-0.95481	1.93167	0.05542	-1.51761	0.85876	-0.34308	1.00097				90.2	2.50211	5.68275	2.84549	6.15948	3.91262	4.64583	3.73994	5.18165
	90.3	13.1092	10.0938	12.467	11.6199	10.0865	7.99926	12.5226	11.2411	12.1947	11.1786	14.0161	12.4566	12.1704	11.7064	11.6346	11.9355				90.3	0.2313	-0.79088	0.46966	-0.09849	0.83082	0.40555	-0.25587	0.36995	0.93252	-0.91666	1.54417	0.1544	-1.46899	0.38752	-0.49007	1.26408				90.3	2.25573	5.59385	3.19508	5.83131	3.98326	3.89604	3.19816	5.06454
	90.4	13.6135	11.2185	11.8464	11.6841	11.0319	7.68528	12.2874	11.584	12.8592	9.86246	13.6348	11.8625	12.6844	11.4194	12.3855	11.0508				90.4	0.34946	-0.461	0.03786	0.01611	2.02048	-0.58945	0.21404	0.76802	1.18091	-0.86422	0.80062	0.04574	-1.12134	-0.19083	-0.76145	0.73615				90.4	1.62138	5.69962	3.69306	5.2611	4.01896	3.78537	3.28305	4.60428
	90.5	14.1105	12.2053	11.3786	11.4883	11.4391	7.1725	12.0196	11.7712	12.8039	8.72106	12.9294	11.8237	13.1361	11.5355	12.8645	9.72649				90.5	-0.09143	0.05519	-0.00433	0.03093	2.23718	-1.405	0.82785	1.15804	0.93779	-0.6821	0.25401	-0.2745	-0.82329	-0.67656	-1.26607	0.39111				90.5	1.33984	5.25069	4.00438	4.41609	4.01277	4.55215	3.42738	4.23524
	90.6	14.1863	12.6311	10.8911	11.048	11.5706	6.57021	12.0218	11.4431	12.7083	8.42518	12.6429	12.3324	13.452	11.879	12.6267	8.75047				90.6	-0.3869	0.55546	0.50312	0.04244	1.34253	-1.74097	1.50167	1.38782	0.31536	-0.42982	0.08615	-0.77361	-0.5367	-0.83715	-1.68257	0.49725				90.6	1.90575	3.87131	4.29184	3.63481	3.65906	5.30071	3.27438	4.31347
	90.7	13.89	12.5454	10.4116	10.4866	11.6166	6.42685	12.4675	10.6117	12.9304	8.48453	12.9191	13.0838	13.8213	12.1347	11.4758	8.83474				90.7	-0.27774	0.79989	1.07731	0.42583	0.19922	-1.15619	1.92444	1.31139	-0.42209	-0.31506	0.2861	-0.96223	-0.16539	-0.55863	-1.52458	0.37573				90.7	3.04806	2.56801	4.55838	3.44137	3.10187	5.16051	2.97169	4.53248
	90.8	13.383	12.1762	10.3816	10.1861	11.139	7.02503	13.0469	9.79547	13.2206	8.5471	13.3614	13.2919	13.9168	12.2338	9.86436	9.70691				90.8	-0.04701	0.61029	1.05857	0.96899	-0.32269	0.09037	1.50508	1.07597	-0.84967	-0.19979	0.40792	-0.5123	-0.09176	-0.03985	-0.6657	-0.22382				90.8	4.04545	2.34639	4.9096	3.62267	2.86192	4.72629	2.55346	4.21004
	90.9	12.8416	11.6114	10.9276	10.4073	10.2393	7.7992	13.3619	9.71444	13.3261	8.9834	13.7078	12.7578	13.2656	12.0593	8.93281	10.3777				90.9	0.11857	0.2329	0.59058	0.97085	0.01158	1.1024	0.09329	0.8549	-0.77242	0.0723	-0.000226363	0.11031	-0.4979	0.44237	0.39543	-0.87782				90.9	4.68128	2.9295	5.51223	4.03103	3.31765	4.89911	1.89913	3.35839
	91	12.486	10.8039	11.7741	10.8337	10.0208	8.2431	13.366	10.5438	13.1643	9.86496	13.7334	12.3795	12.1901	11.5983	9.29212	10.4323				91	-0.07324	-0.05497	0.30709	0.21494	0.74144	1.40236	-1.29498	0.72934	-0.56643	0.14923	-0.60056	0.33395	-0.60905	0.84093	1.10269	-1.03577				91	4.87365	3.29822	5.8281	5.05614	4.16201	5.47551	1.3406	2.90226
	91.1	12.319	10.4823	12.2895	11.2249	10.8416	8.57329	13.2466	11.7777	12.7561	10.6317	13.1762	12.9688	11.4678	11.3414	10.2603	10.2638				91.1	-0.88247	-0.09467	0.36138	-0.67423	1.07698	1.16453	-1.51945	0.7166	-0.50784	-0.21346	-0.82152	0.32588	0.1607	1.09437	1.20626	-0.39453				91.1	4.1582	2.91821	5.42794	6.24449	4.58622	5.58387	1.30386	3.22994
	91.2	12.1975	11.3334	11.885	11.6401	11.6817	8.94564	13.1125	12.7402	12.1176	11.0012	12.1746	14.1976	11.3007	11.8156	10.7798	10.1087				91.2	-1.93988	0.20597	0.39733	-0.88207	0.82111	0.77086	-0.88656	0.54334	-0.45588	-0.65599	-0.76116	0.72801	1.16942	0.9579	0.66802	0.5655				91.2	2.82753	2.30562	4.80511	6.60131	4.34304	5.01548	1.7061	3.6765
	91.3	12.3338	12.6287	10.8484	11.7859	11.9189	9.02476	13.0401	12.7157	11.2443	11.2478	11.5123	15.3192	11.4855	12.8618	10.777	9.88273				91.3	-2.50732	0.60234	0.3217	-0.32273	0.18831	0.3399	-0.35613	-0.03339	-0.26416	-0.86213	-0.64884	1.43548	1.44351	0.58238	-0.31204	0.94658				91.3	1.88496	2.28829	4.81652	6.10237	3.89945	4.24317	2.31611	3.82763
	91.4	12.8781	13.2469	10.0422	11.4928	11.5562	8.77048	13.0976	11.4812	10.5629	11.5192	11.5034	15.9611	11.9655	13.6434	10.7492	9.64884				91.4	-2.1831	0.75925	0.40916	0.3256	-0.51373	-0.38208	-0.21465	-0.68291	0.04234	-0.85528	-0.39409	1.5263	0.78743	0.54818	-1.12844	0.43616				91.4	1.78491	2.89066	5.97135	5.18227	3.80787	3.7532	3.09457	3.84412
	91.5	13.3885	12.8852	9.91348	11.0521	10.6807	8.81591	13.1403	9.9323	10.6304	11.5004	11.5957	16.0817	12.6545	13.402	10.5861	9.67042				91.5	-1.19793	0.59246	0.47347	0.46422	-0.89229	-1.17424	-0.27235	-1.0235	0.10786	-0.62037	-0.12493	0.62607	-0.13371	0.94696	-1.21925	-0.37422				91.5	2.29372	3.79628	7.40808	3.91424	4.26174	3.88687	3.76625	3.54095
	91.6	13.7932	11.9459	10.1828	10.5972	10.3099	9.39213	12.9153	9.19433	11.3099	11.1237	11.3782	15.9198	13.3444	12.3436	9.99946	9.9837				91.6	-0.21211	0.2709	0.25636	0.28726	-0.84523	-1.35753	-0.14361	-1.1082	-0.24576	-0.12748	0.0029	-0.66904	-0.72712	1.17756	-0.73371	-0.95179				91.6	3.14767	5.02795	7.39698	2.68487	4.64808	4.4724	3.89583	2.82692
	91.7	14.4464	11.3383	10.4061	10.2697	11.2376	9.89956	12.5731	9.38861	11.952	11.0723	10.7568	15.74	13.8544	11.4332	9.37668	10.3336				91.7	0.26106	0.04183	-0.05531	0.38565	-0.61488	-0.95292	0.26051	-1.04971	-0.38175	0.56862	-0.02554	-1.62036	-0.98383	0.83694	-0.42298	-1.47309				91.7	4.0184	6.08961	5.7114	2.20004	4.56286	4.72918	3.96069	2.19779
	91.8	14.8994	11.6155	10.5521	10.6064	12.4635	9.63181	12.6132	9.77193	12.0445	11.7215	10.2512	15.277	13.9492	11.2411	9.24763	10.468				91.8	0.19106	-0.01581	-0.38729	1.03969	-0.4297	-0.41824	0.35029	-0.91457	0.13317	1.31349	-0.27388	-1.94559	-1.05645	0.25681	-0.90443	-1.76842				91.8	4.40155	6.18814	3.9531	2.53567	4.41715	4.43662	4.58745	2.16967
	91.9	14.8163	12.171	10.9276	11.5731	13.0598	8.46413	13.2579	9.73861	11.6778	12.2274	10.7772	14.261	13.573	11.6402	9.81187	10.3496				91.9	-0.05315	0.04901	-0.80237	1.77479	-0.17672	0.08702	-0.1614	-0.90608	0.82745	1.48272	-0.40223	-1.59778	-0.98065	-0.07118	-1.86816	-1.18065				91.9	4.28905	5.38398	3.56902	3.26899	4.10716	4.29212	5.17253	2.99933
	92	14.9452	12.3777	11.5099	12.2654	13.1335	7.1773	14.0174	9.69643	11.3007	11.8138	12.0699	13.1709	13.0274	12.273	11.0367	10.2547				92	-0.1736	0.19905	-1.16714	1.66581	0.14751	0.41478	-0.76011	-1.0072	1.1904	0.75474	-0.02925	-0.73495	-0.5956	-0.05945	-2.30394	0.07529				92	4.07843	4.07166	4.42544	4.13083	3.15871	4.37321	5.03108	4.17921
	92.1	15.7319	12.2341	11.897	12.1904	12.9629	6.81039	14.1005	10.16	11.1124	10.835	13.017	12.6878	12.4675	12.8245	12.5014	10.4709				92.1	-0.12423	0.2122	-1.35356	0.75329	0.10422	0.46683	-0.93465	-0.9486	1.15177	0.01233	0.54034	0.21786	-0.000483323	0.21166	-1.80025	0.84488				92.1	3.96077	2.57131	5.32294	4.81995	2.23608	3.92794	4.59375	4.70466
	92.2	16.3797	12.2031	11.7786	11.8032	12.8981	7.4923	13.4481	10.6577	11.1478	9.99464	13.3265	12.8292	12.0151	13.1027	13.3943	10.8446				92.2	0.012	-0.11963	-1.07274	0.02574	-0.42762	0.58754	-0.60102	-0.76329	0.72474	-0.0062	0.83756	1.04973	0.2592	0.56857	-0.87145	0.50912				92.2	4.09848	1.62322	5.31541	4.98508	2.12837	3.04764	4.40237	4.27318
	92.3	15.957	12.7508	11.1908	11.6218	13.0009	8.60871	12.8472	10.776	11.4538	9.68252	13.2253	13.0958	11.9097	13.0179	13.0406	10.8898				92.3	0.1407	-0.65954	-0.33359	-0.13349	-0.7831	1.04517	-0.02957	-0.52453	0.07503	0.30173	0.79454	1.69927	-0.00393	0.68344	-0.12561	-0.41102				92.3	4.58067	1.72834	4.59091	4.75531	2.35467	2.43992	4.39618	3.55512
	92.4	14.769	13.4793	10.5826	11.5156	13.0678	9.39503	12.8708	10.8579	11.626	9.85746	12.8685	13.0147	11.9373	12.6293	11.7444	10.4395				92.4	0.31227	-1.16855	0.14085	-0.185	-0.33653	1.56171	0.48895	-0.23916	-0.28124	0.31341	0.66757	1.89305	-0.29186	0.22561	0.27192	-1.12765				92.4	5.23611	2.35116	4.08998	4.71415	2.54322	2.14815	4.34178	3.15321
	92.5	13.7421	13.696	10.3516	11.2588	13.0637	9.45035	13.0235	11.0733	11.2149	10.092	12.649	12.3539	11.7423	12.1992	10.8913	10.0701				92.5	0.60576	-1.53106	0.12445	-0.49425	0.4994	1.67266	0.81027	-0.18168	-0.11719	-0.11924	0.63408	1.44735	-0.11434	-0.46247	0.46416	-1.29944				92.5	5.42466	2.88857	4.0554	5.18822	2.86407	2.11039	4.14435	3.34744
	92.6	13.2993	13.4769	10.4364	11.1418	12.8843	9.26699	12.6449	11.3913	10.6767	10.334	12.8376	11.6306	11.4117	12.0801	11.073	10.3782				92.6	0.87934	-1.59237	0.18378	-0.84833	0.84124	1.23198	0.75755	-0.31122	0.23418	-0.61395	0.47505	0.71248	0.35704	-0.42256	0.29348	-0.99869				92.6	4.73744	3.30293	3.75803	5.69055	3.50517	2.6192	4.08777	4.16008
	92.7	13.2751	13.2482	10.9221	11.2523	12.3971	9.22841	12.2524	11.7249	10.6412	10.8569	13.1158	11.6907	11.1838	12.167	11.3029	10.9815				92.7	0.89553	-1.08099	0.53582	-0.93494	0.44291	0.67706	0.36982	-0.38876	0.47026	-0.74555	0.038	0.3808	0.70487	0.52966	-0.48021	-0.59485				92.7	3.71175	3.51366	2.78389	5.73389	4.48167	3.36146	4.2557	4.99552
	92.8	13.2865	13.0824	11.7873	11.3655	11.7764	9.14044	12.6732	11.8079	10.9137	11.26	12.9637	12.1971	11.3165	11.9735	10.7509	11.2911				92.8	0.55573	-0.07368	1.0103	-0.65904	-0.26144	0.52032	-0.07934	-0.63792	0.55976	-0.7009	-0.38379	0.81902	0.81727	1.50174	-1.35762	-0.37564				92.8	2.98686	3.5277	1.7938	5.6024	5.11208	3.70279	4.01968	5.08915
	92.9	13.0912	12.6666	12.3542	11.5824	11.3444	9.14107	13.6933	11.6565	11.08	10.8899	12.2053	12.2713	11.8941	11.6872	9.94718	11.3542				92.9	0.16347	0.60624	1.50871	-0.12039	-0.75032	0.67933	-0.47237	-1.09148	0.57947	-0.97296	-0.51828	1.5216	0.79929	1.94118	-1.75715	-0.34186				92.9	2.80002	3.61265	1.67917	5.374	4.78045	3.8371	3.36454	4.33226
	93	12.8754	12.0401	12.078	11.7845	11.2585	9.46502	14.3936	11.3973	11.1039	10.125	11.251	12.1032	12.4181	11.7531	10.0641	11.1275				93	-0.11641	0.2922	1.8839	0.30799	-0.81735	0.78746	-0.66922	-1.23607	0.39293	-1.55027	-0.44999	1.61772	0.80592	2.07666	-1.71532	-0.29154				93	3.32232	4.01766	2.43915	4.7346	3.88517	4.18727	3.01847	3.51083
	93.1	13.0063	11.8679	11.137	11.5976	11.385	9.81122	14.0912	11.0013	11.1622	9.83016	10.8286	12.2645	12.3537	11.7515	11.001	10.3876				93.1	-0.4027	-0.55611	2.07158	0.42664	-0.58086	0.66529	-0.38096	-0.71642	-0.15957	-1.97443	-0.29713	1.13971	0.94877	1.92357	-1.09802	0.06611				93.1	4.06911	4.45227	3.36955	3.9839	2.83493	4.56922	3.03032	3.34825
	93.2	13.5414	12.4478	10.1555	11.0743	11.6007	9.75018	12.8667	10.7032	11.2246	9.92964	11.1667	12.6691	11.9137	11.3298	11.3502	9.465				93.2	-0.58867	-1.08441	2.17204	0.46392	-0.24482	0.16659	0.12128	0.11695	-0.86175	-1.96053	-0.01763	0.61724	0.94795	1.26488	0.11143	0.6616				93.2	4.04132	4.2589	4.00174	3.73816	2.01758	4.58792	3.11754	3.70454
	93.3	13.8527	12.9963	9.54503	10.488	11.9869	9.13746	11.4221	10.6865	11.1299	9.72895	11.7127	13.0444	11.6874	10.9666	10.6193	9.04766				93.3	-0.57296	-1.15702	2.13379	0.47802	-0.05185	-0.74615	0.20305	0.47243	-1.4039	-1.68993	0.38232	-0.06404	0.5116	0.30917	1.09008	1.06589				93.3	3.32938	3.41215	4.34024	3.88537	2.12332	4.27605	3.22196	4.19526
	93.4	13.2174	12.4437	9.1808	10.3221	12.2907	8.28353	10.404	10.7926	11.0715	9.34208	11.9641	13.4436	11.7395	10.9064	9.79278	9.33917				93.4	-0.47339	-1.16649	1.87239	0.18532	-0.20515	-1.59874	-0.11285	0.07274	-1.39808	-1.6758	0.92315	-0.85544	-0.17017	-0.48532	1.25029	0.98224				93.4	2.80613	2.75468	4.25512	3.99584	3.00864	3.99899	3.12158	4.39152
	93.5	11.995	10.9672	9.06306	11.1592	12.0709	7.71173	9.98931	10.7427	11.2273	9.28343	11.9077	13.8739	11.6697	10.742	9.85513	9.88737				93.5	-0.30235	-1.31407	1.3319	-0.37962	-0.45647	-1.74847	-0.29479	-0.52583	-0.55367	-2.10661	1.45758	-1.22722	-0.72419	-0.89884	1.00802	0.46989				93.5	2.63832	3.08909	3.38605	4.04672	3.73539	4.01283	2.74211	3.94029
	93.6	11.0777	9.8124	9.47118	12.5047	11.8394	7.70153	10.3841	10.4082	11.5427	9.46183	11.6834	14.0984	11.3201	10.5442	10.9661	10.538				93.6	-0.07712	-1.30968	0.40999	-0.90481	-0.40961	-1.27661	-0.04702	-0.65265	0.41692	-2.20752	1.61829	-1.15535	-0.78817	-1.00918	0.84464	-0.2842				93.6	2.80161	4.26162	2.05899	4.0731	3.93729	4.11681	2.55167	3.08192
	93.7	10.7187	9.86306	10.1582	12.9846	12.3423	8.18075	11.7566	9.97721	11.638	9.47172	11.4246	14.0192	11.1792	10.9351	12.3886	11.4294				93.7	-0.01918	-0.87765	-0.4961	-1.2175	-0.26301	-0.80193	0.51287	-0.38798	0.80654	-1.1069	1.35893	-1.00628	-0.27195	-0.81226	0.84565	-1.02155				93.7	3.41865	5.21902	1.32661	4.18882	3.85712	3.97539	2.81174	2.37231
	93.8	10.5831	10.65	10.3607	12.2431	12.9664	8.84961	13.4311	9.55802	11.0465	9.20038	11.2049	13.6607	11.8207	11.7873	12.9935	11.9786				93.8	-0.19325	-0.35386	-0.60608	-1.00081	-0.40396	-0.62392	1.00148	-0.27827	1.11017	0.56803	0.94896	-0.86001	0.31867	-0.28889	1.07239	-1.43084				93.8	3.885	5.48614	1.6035	4.45366	3.67844	3.67613	3.1397	2.34243
	93.9	10.4817	11.0233	9.95382	11.3572	12.9735	9.27038	14.2943	9.21423	10.3722	9.00369	11.02	13.0083	13.0281	12.3003	12.5066	11.6863				93.9	-0.40878	-0.28372	-0.0186	-0.14095	-0.90327	-0.74953	1.213	-0.39932	1.49663	1.35758	0.58904	-0.52598	0.6248	0.22711	1.41292	-1.30345				93.9	3.61653	5.73663	2.57548	4.47831	3.41486	3.52587	3.08428	3.30487
	94	10.4701	10.8419	9.74262	10.9845	12.4303	9.20614	13.9744	9.30621	10.6494	9.12655	11.1127	12.4942	13.8941	12.1773	11.6608	11.1392				94	-0.56335	-0.67668	0.52236	0.74402	-1.63176	-1.01553	1.20998	-0.46997	1.42362	1.0775	0.25397	0.17506	0.77888	0.47251	1.51374	-0.71937				94	3.15201	6.34556	3.63092	4.11365	3.11581	3.5996	2.77225	4.57308
	94.1	10.7038	10.7264	10.4099	10.5059	11.4159	8.9354	13.1235	9.97729	11.7522	9.36106	11.6681	12.6144	13.7375	11.9327	11.0132	10.9174				94.1	-0.60737	-1.04921	0.59373	1.27986	-2.10177	-1.16002	0.90089	-0.40078	0.88962	0.68273	-0.20897	0.87574	0.63815	0.60688	1.25538	0.01623				94.1	3.28172	6.73341	3.97183	3.77489	2.91382	3.61566	2.71097	5.09153
	94.2	11.3778	10.9246	11.6611	9.60918	10.2723	8.70538	12.5367	10.7754	12.7332	9.63228	12.4466	13.1588	12.9026	12.069	10.6339	10.8391				94.2	-0.40341	-1.21127	0.2508	1.71305	-1.74218	-1.00825	0.42378	-0.17118	0.37336	0.62679	-0.62629	0.99378	0.21999	0.68782	0.92107	0.52016				94.2	3.72433	6.12664	3.54801	3.76607	2.78165	3.32842	3.16494	4.73805
	94.3	12.1852	11.2899	12.4896	9.09744	9.63784	8.59147	12.1986	11.3091	12.7601	10.05	13.344	13.4784	12.1125	12.3744	10.4887	10.8114				94.3	-0.00555	-1.28994	-0.0595	1.93017	-0.8442	-0.70154	0.26357	0.14032	0.322	0.78113	-0.41699	0.60825	-0.03438	0.44899	0.52323	0.64257				94.3	3.73821	4.51861	3.14091	3.86408	2.57016	2.97734	3.92572	4.09186
	94.4	12.6866	11.6464	12.4079	9.44223	9.62456	8.87532	11.6574	11.5031	11.8911	10.5816	14.2062	13.2304	11.6725	12.2872	10.6352	10.9681				94.4	0.27366	-1.14748	0.15026	1.71828	-0.24767	-0.70889	0.61733	0.26412	0.78063	1.15174	0.24508	0.13714	-0.34588	-0.03134	-0.04713	0.49773				94.4	3.44003	3.07468	3.133	3.73555	2.42951	3.02178	4.53362	4.03702
	94.5	12.856	12.0286	11.9464	10.0083	10.0164	9.44375	11.1326	11.2995	11.1612	10.8826	14.4829	12.6954	11.4924	11.6361	11.098	11.1893				94.5	0.13756	-0.71475	0.82709	1.48847	-0.08275	-0.94859	1.30019	0.06205	1.33112	1.54998	0.47273	-0.12511	-1.07537	-0.40949	-0.21716	0.24571				94.5	3.34022	2.82327	3.33993	3.52031	2.71642	3.45991	4.71519	4.89511
	94.6	12.9202	12.3468	11.7571	10.0002	10.8136	9.41432	11.1581	10.9695	11.0306	10.6929	13.7887	12.2355	11.3078	10.8618	11.4482	11.57				94.6	-0.41273	-0.15919	1.23328	1.54976	0.0647	-0.79085	1.88362	-0.407	1.65137	1.65056	0.04958	0.12178	-1.63178	-0.63878	0.32962	0.01796				94.6	3.5127	3.19069	3.67053	3.51558	3.53127	3.96624	4.45263	5.84993
	94.7	13.1965	12.5277	11.8616	9.69828	11.7825	8.39469	11.7331	11.0309	11.0224	10.3799	12.5893	12.053	11.1887	10.4944	11.1223	12.2032				94.7	-0.81204	0.46078	0.98823	1.58751	0.1636	-0.17086	1.94561	-0.84944	1.58939	1.40951	-0.64964	0.88133	-1.36425	-0.64033	0.86261	-0.23639				94.7	3.53168	3.30633	3.88578	3.6572	4.76497	4.53172	3.97506	6.06257
	94.8	13.6799	12.8949	12.0153	10.1481	12.3965	7.18788	12.4287	11.2612	11.0856	10.0858	11.8914	12.3232	11.4956	10.5142	10.3533	12.4342				94.8	-0.78923	1.02678	0.58636	1.30885	0.00463	0.32376	1.57863	-0.84019	1.18776	0.83312	-1.18833	1.5864	-0.46924	-0.35479	0.75528	-0.56423				94.8	3.15844	3.41962	3.78524	3.93111	5.9549	5.32704	3.76564	5.44952
	94.9	13.7844	13.4507	12.1956	11.3615	12.6238	6.61468	12.7316	10.8664	11.4476	9.39354	12.1103	12.7795	11.9885	10.5722	9.92989	11.8947				94.9	-0.70711	1.29137	0.33986	0.81557	-0.17395	0.39164	1.06449	-0.41795	0.81178	0.15981	-1.18923	1.75307	0.29654	-0.03062	0.18889	-0.77995				94.9	2.83252	3.83339	3.7656	4.44619	6.12626	6.14742	4.01978	4.63797
	95	13.122	13.5683	12.3508	12.2391	12.8852	6.76637	12.3722	9.75336	11.6885	8.36471	12.8218	13.0804	11.969	10.574	10.2353	11.074				95	-0.60124	1.21359	0.0391	0.14754	-0.19687	0.19911	0.57782	0.01378	0.63015	0.04349	-0.79488	1.42841	0.32106	0.04588	-0.50647	-0.88578				95	2.89545	4.05444	4.10198	4.73957	4.92244	6.42207	4.29898	4.08075
	95.1	12.1348	12.9271	12.213	12.366	13.1611	7.39064	11.5689	8.87848	11.2486	7.71749	13.3986	13.2957	11.4037	10.7666	11.0681	10.4447				95.1	-0.27428	0.90072	-0.40398	-0.72423	-0.37102	0.0141	0.39674	0.239	0.32244	0.60002	-0.51837	0.97651	-0.21477	-0.1037	-1.12491	-1.07946				95.1	3.06425	3.83937	4.39628	4.106	3.66476	5.82917	4.36301	3.73352
	95.2	11.5693	12.3162	11.8809	12.2869	13.0355	8.1822	11.0741	9.3632	10.3573	7.8666	13.2513	13.2637	10.992	11.2963	11.8214	10.1547				95.2	0.13106	0.56589	-0.78936	-1.25285	-0.56689	0.06269	0.51685	0.29444	-0.06815	1.26397	-0.53689	0.70934	-0.49583	-0.22042	-1.19829	-1.18674				95.2	3.48416	3.59348	4.05978	2.82112	3.36351	4.70958	4.51099	3.82902
	95.3	11.8038	12.3961	11.6776	12.2111	12.6833	8.75208	11.4551	10.906	10.0233	8.46807	12.2941	12.7386	11.1186	11.9227	12.1031	10.0219				95.3	0.43026	0.4251	-0.9976	-0.84583	-0.21243	0.3252	0.58466	0.36485	0.02323	1.48138	-0.6915	0.62432	-0.30633	-0.12497	-0.39492	-0.86309				95.3	4.59527	3.33944	2.98218	1.9933	3.23749	3.99413	4.84607	4.48067
	95.4	12.6284	12.6016	11.422	11.7471	12.6046	8.81118	12.3666	11.6472	10.7286	9.05224	11.438	11.9954	11.4804	12.0023	12.1686	9.50654				95.4	0.57226	0.42018	-1.10829	0.23739	0.3311	0.63639	0.52586	0.29122	0.51707	1.0411	-0.67749	0.55457	-0.22778	-0.03209	0.61678	-0.3243				95.4	5.76404	3.06127	1.79963	2.14871	2.92871	4.39224	5.13341	4.96059
	95.5	13.591	12.0899	10.8368	10.9085	12.766	8.65535	13.0592	10.7883	11.6313	9.41999	11.5445	11.4721	11.747	11.4492	12.0422	8.63534				95.5	0.61199	0.49058	-1.15481	1.22615	0.11941	0.88565	0.4673	-0.25392	0.76604	0.06986	-0.14742	0.63727	-0.40001	-0.20044	0.94358	-0.04108				95.5	6.0259	3.28451	1.22658	2.65258	3.26919	5.41562	5.24346	4.68447
	95.6	14.3522	10.8654	10.3375	10.4493	12.9377	8.6779	13.2574	9.68416	11.8928	9.56425	12.3477	11.2951	12.0046	11.1902	11.2627	8.20361				95.6	0.74886	0.70243	-1.11189	1.67759	-0.48819	0.93701	0.33836	-0.92117	0.59891	-0.95265	0.60536	1.06289	-0.55792	-0.29678	0.61809	-0.0617				95.6	5.22288	3.90099	1.54454	2.63385	4.17395	5.99504	5.19	4.07209
	95.7	14.7706	9.98862	10.393	10.657	12.808	8.73096	13.0665	9.63092	11.899	9.79344	13.2492	11.2602	12.3615	11.5965	10.1984	8.63558				95.7	1.04018	0.8224	-0.94968	1.8597	-0.40038	0.75334	0.10048	-1.19165	0.27946	-1.19528	0.78167	1.33476	-0.76089	0.08392	0.27257	-0.23247				95.7	3.88369	4.0529	2.56361	2.33534	4.49177	5.47126	5.08458	3.57155
	95.8	14.861	10.1346	10.5042	10.79	11.8305	8.55081	12.6373	10.3654	12.4178	10.3512	13.931	11.238	12.6314	11.7992	9.87462	9.46699				95.8	1.20128	0.48294	-0.64135	2.1046	0.25414	0.63301	0.000348202	-1.05826	0.09312	-0.4883	0.42865	0.99457	-0.9194	0.76607	0.26194	-0.34653				95.8	2.77497	3.45114	3.66048	2.50283	3.81906	4.09929	5.10017	3.31106
	95.9	14.7459	10.5158	9.92342	10.4024	10.3998	8.37311	12.3744	11.0097	13.4292	11.0124	14.1798	11.3321	12.7423	11.3832	10.2397	9.9905				95.9	0.98863	-0.08283	-0.38065	2.16408	0.64572	0.77979	0.08364	-0.56241	0.22572	0.26338	0.34033	0.5273	-0.74501	1.30889	0.41995	-0.13668				95.9	2.20615	2.42202	4.25424	2.88686	3.22333	2.98397	5.30738	3.59869
	96	14.497	10.5034	8.94392	10.066	9.77794	8.54411	12.5698	11.2989	14.17	11.2902	14.1136	11.5879	12.8735	11.092	10.4452	10.1884				96	0.48375	-0.32929	-0.41333	1.67109	0.70217	0.78529	0.14071	0.31014	0.48561	0.51455	0.57822	0.53567	-0.41559	1.41946	0.43528	0.28749				96	2.2609	1.50443	4.02784	3.10962	3.82957	2.88142	5.50958	4.2637
	96.1	14.0657	10.2865	8.6238	10.2453	10.2244	8.86989	12.7112	11.4105	14.0858	10.9636	14.0098	11.8418	13.0575	11.4626	10.3273	10.2718				96.1	-0.21072	-0.47808	-0.46567	0.5731	0.7646	0.33249	0.02174	1.09014	0.46122	0.51666	0.31289	1.00773	-0.45594	1.16753	0.26579	0.52444				96.1	3.30135	1.19005	3.27523	3.53924	4.90326	3.20026	5.46934	4.62202
	96.2	13.5821	9.86725	9.33566	10.5481	10.7865	8.95476	12.3468	11.3443	13.4521	10.54	13.778	11.9808	13.2223	12.1067	10.2633	9.99723				96.2	-0.95741	-0.84837	-0.27016	-0.75783	0.76653	-0.14834	-0.3406	1.30936	0.09449	0.40038	-0.80205	1.43479	-0.85251	0.67515	0.11634	0.34371				96.2	4.84129	1.63399	2.89338	4.22629	5.13671	2.98041	5.21266	4.59531
	96.3	13.5657	9.43229	10.3081	10.4388	10.8218	8.76715	11.948	11.0242	12.5119	10.5609	13.3837	12.0987	13.5338	12.4782	10.1662	9.72577				96.3	-1.24902	-0.94805	-0.1989	-1.67496	0.59638	-0.25016	-0.59146	0.98216	-0.32325	0.32443	-2.02255	1.3365	-0.90115	0.02377	0.15129	-0.13237				96.3	5.58242	2.676	3.29929	4.59452	4.46703	2.21628	4.60362	4.53848
	96.4	14.15	9.71525	10.8318	10.0951	10.7223	8.34165	12.0982	10.619	11.1493	10.6545	13.1156	12.3732	14.0376	12.3899	9.68986	10.188				96.4	-0.90212	-0.5123	-0.53557	-1.77844	0.30692	-0.07411	-0.27291	0.25686	-0.41225	0.65315	-2.42378	0.80449	-0.33863	-0.57589	0.33714	-0.58314				96.4	5.05635	4.01848	4.20805	4.60692	3.62567	1.54175	3.50929	4.63752
	96.5	14.8479	10.9909	10.9884	10.0664	11.1848	7.60925	12.5606	10.3509	10.0261	10.4272	13.0358	12.89	14.2299	12.0268	9.15189	10.9536				96.5	-0.44747	0.03117	-0.86288	-1.23089	0.02306	0.0999	0.32721	-0.43553	0.0124	1.22351	-2.14078	0.25708	0.21322	-0.93057	0.62016	-0.82359				96.5	3.73708	5.133	5.18198	4.73671	3.43799	1.37805	2.64664	5.0097
	96.6	15.2953	12.6049	10.9199	10.4689	12.1991	6.92466	12.6544	10.1162	10.0937	10.4005	13.0319	13.4126	13.6684	11.6992	9.17512	11.2621				96.6	-0.33621	0.25424	-0.67151	-0.55785	0.2587	0.04689	0.69286	-0.61136	0.58121	1.60235	-1.97781	-0.14896	0.36797	-1.05452	0.78669	-0.67179				96.6	2.34184	5.35204	5.73579	4.85404	4.27262	1.75411	2.85952	5.36043
	96.7	15.3667	13.6757	10.6028	11.099	12.9967	6.94775	12.1874	9.8084	11.1477	10.9975	13.245	13.5645	12.6774	11.5272	9.76954	10.9597				96.7	-0.40509	-0.02251	-0.12348	-0.35298	1.06476	-0.12388	0.78185	-0.4191	0.75987	1.78879	-2.12925	-0.4351	0.4361	-0.82927	0.51571	0.05606				96.7	1.50107	4.93221	5.76548	4.61554	5.60999	2.48213	3.78182	5.19793
	96.8	14.9345	13.9102	10.4982	11.6354	13.1082	7.91441	11.6512	9.75717	12.339	11.624	13.621	13.3722	12.0349	11.5254	10.3884	10.2536				96.8	-0.2726	-0.3551	0.24612	-0.7591	1.42608	-0.21616	0.72828	-0.28423	0.52687	1.91404	-2.04527	-0.54682	0.7656	-0.15335	0.00798	0.79412				96.8	1.35798	4.77275	5.52833	4.36072	6.41755	3.34117	4.4577	4.52294
	96.9	14.2497	13.7461	10.7977	11.6417	12.8899	9.43822	11.598	10.0584	13.0765	11.5251	13.8401	13.1295	12.0541	11.6744	10.7098	9.83618				96.9	-0.04499	-0.25613	0.16338	-1.31922	0.84332	-0.38637	0.4773	-0.42069	0.38065	1.81408	-1.42587	-0.48442	1.20874	0.44913	-0.33251	0.72773				96.9	1.7866	4.87886	5.03934	4.43242	6.26851	4.18581	4.50624	3.71538
	97	13.8647	13.6349	10.9757	11.1048	12.8581	10.6303	11.9508	10.4315	13.2285	10.6543	13.6918	12.9332	12.3718	11.9654	10.9552	10.1878				97	-0.16278	-0.05474	-0.1627	-1.42695	0.04614	-0.51596	0.07635	-0.79105	0.61488	1.356	-0.64123	-0.31803	1.22762	0.46378	-0.49786	0.28107				97	2.50401	4.56537	4.12776	4.40063	5.73026	4.79177	4.14046	3.38828
	97.1	14.0837	13.5982	10.8608	10.588	12.9015	10.8443	12.2192	10.9399	13.2036	9.56912	13.1396	12.7712	12.5662	12.1396	11.5063	10.6598				97.1	-0.66272	-0.17974	-0.24278	-0.92098	-0.39542	-0.19765	-0.16244	-1.09678	0.96528	0.59659	0.07581	-0.22445	0.672	0.20179	-0.52496	0.21697				97.1	2.73596	3.62751	3.03009	3.83414	5.29781	4.97833	3.80889	3.78829
	97.2	14.7867	13.5074	10.5964	10.5565	12.6576	10.42	12.3372	11.5159	13.2322	9.01293	12.4958	12.6835	12.6658	11.8274	12.1567	10.4707				97.2	-1.08424	-0.55823	-0.11521	-0.22975	-0.56188	0.27476	-0.07371	-1.03373	1.13264	-0.38662	0.74031	-0.29592	-0.03693	0.16556	-0.33531	0.27775				97.2	2.30987	2.6305	2.53387	3.14126	4.83496	4.53983	3.92949	4.29635
	97.3	15.2418	13.2466	10.2089	10.8636	12.5405	9.81404	12.6175	11.7212	12.9732	9.38279	12.197	12.7998	12.9519	11.2146	12.3872	9.74141				97.3	-0.96431	-0.86853	-0.37879	0.10371	-0.56064	0.40892	0.19998	-0.48314	1.02128	-1.41426	1.01681	-0.51159	-0.5606	0.39076	-0.01317	0.09592				97.3	2.4311	2.20935	2.87532	3.2039	4.22713	3.2978	4.17967	4.32262
	97.4	14.9291	12.8745	9.90017	10.8282	13.0658	8.98941	13.0536	11.4465	12.1672	10.3449	12.3758	12.8277	13.3663	10.7661	12.2632	9.05899				97.4	-0.34829	-0.86604	-1.01375	0.15084	-0.51542	0.33107	0.44371	0.35812	0.72655	-2.08445	0.81287	-0.94076	-0.77783	0.51533	0.15993	-0.07554				97.4	3.59585	2.59392	3.57373	4.43046	3.72253	2.02354	3.82054	4.08803
	97.5	14.552	12.6784	9.85942	10.1073	13.6486	8.27247	13.4019	10.9062	11.1888	10.9145	12.7573	12.2519	13.579	10.644	12.2484	8.97091				97.5	0.04376	-0.48212	-1.47279	0.37756	-0.44708	0.2822	0.46203	0.91324	0.37176	-2.11628	0.54916	-1.38594	-0.64552	0.27571	0.0883	-0.00296				97.5	4.62945	3.62001	4.28456	5.88936	3.36748	1.84205	3.06595	4.00446
	97.6	14.9147	12.6638	10.0679	9.37645	13.5086	8.16904	13.4202	10.1957	10.8598	10.4552	12.7955	11.3117	13.4894	10.8431	12.4653	9.74164				97.6	-0.11398	0.11998	-1.66844	0.73421	-0.07337	0.15457	0.42067	0.72562	0.08572	-1.75737	0.39034	-1.37424	-0.45169	-0.24105	-0.01399	0.14289				97.6	4.81949	4.70652	4.54642	6.22154	2.76962	2.66942	2.71343	4.1455
	97.7	15.6426	12.6257	10.3553	9.39908	12.7096	8.39784	12.946	9.40816	11.3143	9.4548	12.4678	10.6972	13.2592	11.131	12.6828	10.8092				97.7	-0.19055	0.5112	-1.68128	0.7402	0.50394	-0.1303	0.63975	-0.10733	-0.02497	-1.41275	0.16651	-0.82629	-0.3472	-0.68839	0.02453	0.09657				97.7	4.50527	4.98901	4.10506	5.66816	2.25481	3.84486	3.11776	4.45879
	97.8	16.0468	12.7874	10.425	10.0199	11.4812	8.56311	12.0271	8.83542	11.433	8.70036	12.1464	10.7661	12.9577	11.2392	12.656	11.2008				97.8	0.01606	0.43931	-1.43963	0.29377	0.85756	-0.35541	1.00196	-0.86218	-0.05117	-1.16919	-0.12704	-0.12636	-0.05823	-0.82451	0.35375	-0.03052				97.8	4.01395	4.38035	3.6789	5.15466	2.78406	4.89968	4.13364	4.65875
	97.9	16.1233	13.4015	10.2699	10.569	10.1856	8.69426	11.0953	8.65918	10.3868	8.73142	11.8633	11.5078	12.611	11.427	12.2233	10.9388				97.9	-0.03074	0.31548	-0.96026	-0.1524	0.90007	-0.29388	1.1873	-0.95628	-0.13785	-0.8216	-0.22759	0.38332	0.44724	-0.78909	1.08079	-0.14559				97.9	3.58773	3.97246	4.12386	4.70983	4.19701	5.19743	5.08098	4.4345
	98	16.0545	14.1295	10.1334	10.7694	9.38788	8.68117	10.6265	8.73371	8.93857	9.79563	11.6373	12.4609	12.4588	11.7527	11.2901	10.8171				98	-0.39138	0.6218	-0.27834	-0.23858	0.78873	-0.09707	1.12109	-0.64071	-0.1618	-0.22422	-0.04678	0.62351	0.79562	-0.64038	1.76405	-0.4077				98	3.54487	4.28407	5.28083	4.11943	5.01076	4.53136	5.27688	3.83315
	98.1	15.7802	14.2463	10.0557	10.8339	9.29625	8.44912	10.5866	9.15207	8.35097	11.135	11.4615	12.9075	12.6759	11.6516	10.0504	11.2313				98.1	-0.54343	1.23879	0.33405	-0.16709	0.52145	0.07549	1.02548	-0.30222	0.05643	0.49192	0.34209	0.64458	0.79649	-0.20204	1.95275	-0.70457				98.1	3.75941	4.74718	5.9674	3.49814	4.45084	3.65182	4.79273	3.24594
	98.2	15.4772	13.3927	10.2021	10.8933	9.77299	8.38401	10.9418	10.1537	8.80948	11.6571	11.0872	12.8038	13.0191	11.1389	9.03982	11.7708				98.2	-0.1697	1.68463	0.3004	-0.28162	0.08838	0.31835	1.32239	-0.09525	0.39576	1.10948	0.89978	0.62519	0.6957	0.31413	1.71016	-0.73267				98.2	3.76598	5.03652	5.14046	3.20624	3.38116	3.39349	4.28031	3.3043
	98.3	15.4387	12.2877	10.688	10.8476	10.4823	8.73343	11.8926	11.1476	9.34971	11.4356	10.5485	12.5672	13.2093	10.8786	8.80619	11.728				98.3	0.55429	1.57781	-0.41041	-0.59082	-0.17021	0.53939	2.10289	-0.16903	0.6268	1.3963	1.26055	0.48565	0.54769	0.57629	1.1775	-0.56672				98.3	3.43075	5.30295	3.49218	3.34772	2.80131	3.86552	4.19995	3.92769
	98.4	15.6035	11.7684	11.1196	10.6405	10.7643	9.29762	13.0253	11.2185	9.28619	11.1817	10.253	12.1965	13.1443	11.0789	9.57321	11.0954				98.4	1.358	0.96538	-1.1502	-0.86827	0.15654	0.52367	2.65019	-0.38273	0.54627	1.29273	1.06468	-0.05188	0.16908	0.51918	0.50646	-0.36194				98.4	3.30552	5.64114	2.88945	3.50862	3.01397	4.55451	4.41838	4.39493
	98.5	15.6857	11.6685	11.2453	10.4427	10.4123	9.89977	13.4758	10.7345	9.04375	10.9301	10.4079	11.7856	12.7773	11.4858	10.9663	10.6628				98.5	1.7291	0.37498	-1.34731	-0.82639	0.73838	0.34267	2.25924	-0.41259	0.01026	0.94955	0.55405	-0.43404	-0.12124	0.26622	0.0159	-0.06619				98.5	3.85454	5.85282	3.57959	3.38957	3.92859	4.89744	4.54435	4.47036
	98.6	15.5655	11.6408	11.2195	10.601	10.0899	10.3136	13.0699	10.721	9.26307	10.4804	11.003	11.7509	12.3161	11.8077	12.0565	10.7399				98.6	1.24289	0.12946	-0.94353	-0.27589	0.88647	0.14528	1.13402	-0.13023	-0.74612	0.43151	0.27596	0.03076	0.193	0.01871	0.00274	0.2326				98.6	4.44234	5.73018	4.22602	3.05067	5.05516	4.679	4.34513	4.34298
	98.7	15.2785	11.978	11.2507	11.1481	10.2014	10.2726	12.3163	11.0793	10.0306	10.134	12.0486	11.983	12.0113	11.8374	12.0796	10.6937				98.7	0.29719	-0.00623	-0.4044	0.49023	0.648	0.00973	0.07062	0.27392	-1.20485	-0.30099	0.26788	0.79904	0.99079	-0.19748	0.48144	0.50536				98.7	4.15639	5.25838	4.14701	2.85367	5.82072	4.15083	4.0338	4.16349
	98.8	14.8273	12.9236	11.4561	11.6232	10.3219	9.95853	11.9239	10.921	11.1262	10.1201	13.3243	11.8636	11.9451	11.6258	11.2956	10.1722				98.8	-0.52818	-0.23435	-0.25787	0.98877	0.34053	0.03739	-0.30281	0.22523	-1.03856	-1.12487	0.03333	0.98778	1.78525	-0.40989	1.12557	0.81761				98.8	3.39405	4.58227	3.48638	3.16949	5.98006	3.76722	4.04965	4.12521
	98.9	14.233	14.0411	11.6446	11.6633	10.1951	9.56525	12.0903	10.2767	12.2566	10.0264	14.3213	11.1765	12.3787	11.2957	10.5941	9.71992				98.9	-0.98539	-0.40811	-0.36278	1.09278	0.13209	-0.052	0.0264	-0.61946	-0.50597	-1.70247	-0.39114	0.68015	2.13838	-0.52057	1.44957	0.966				98.9	3.21973	3.94498	2.87593	3.93719	5.41687	3.64459	4.14424	4.58073
	99	13.732	14.7485	11.6099	11.4471	10.0577	8.77671	12.3044	9.98382	12.966	9.47309	14.6582	10.4576	13.1415	10.8836	10.3562	9.98244				99	-1.01326	-0.37382	-0.19211	0.86013	0.28879	-0.73229	0.46572	-1.57432	-0.29324	-1.75341	-0.47437	0.47128	2.04894	-0.39394	1.34887	0.79556				99	3.62251	3.75451	2.97536	4.55051	4.36423	3.7289	3.64053	5.46264
	99.1	13.7009	14.6684	11.6502	11.3427	9.99564	7.63306	12.3064	10.1064	12.9912	8.90066	14.1969	10.2851	13.4035	10.5533	10.5501	10.8531				99.1	-0.9807	-0.09183	0.14156	0.38523	0.76624	-1.65213	0.52812	-1.80062	-0.65414	-1.07638	-0.14437	0.44687	1.96672	-0.000977542	1.1747	0.48151				99.1	3.66074	4.19783	3.55907	4.38955	3.56902	4.20211	2.77624	6.24893
	99.2	14.2218	13.8781	11.8475	11.4216	9.86016	6.7623	12.0475	9.98797	12.6855	8.94605	13.2358	10.5707	12.8337	10.669	11.0104	11.5816				99.2	-1.2343	0.17265	0.01202	-0.07675	1.09258	-2.00872	0.26638	-1.36463	-1.05337	0.16448	0.19237	0.46002	1.86822	0.30042	1.24024	0.44075				99.2	2.89944	4.63968	3.76557	3.80315	3.55989	4.99901	2.72258	6.43452
	99.3	14.7862	13.0987	11.6773	11.4769	9.54543	6.4423	11.4696	9.71774	12.4514	9.7574	12.5627	11.0099	12.0242	11.1798	11.4034	11.676				99.3	-1.47055	0.03576	-0.64275	-0.31743	1.01678	-1.71492	-0.20334	-0.74304	-0.83644	1.22967	0.23571	0.40326	1.3733	0.15267	1.38518	0.78037				99.3	1.91748	4.61605	3.16566	3.58557	4.01456	5.55889	3.71347	5.78636
	99.4	14.7026	12.7528	11.0322	11.3596	9.29627	6.69756	11.0713	10.1247	12.3428	11.1399	12.6046	11.4739	11.7147	11.5115	11.4249	11.5				99.4	-1.49418	-0.30297	-0.93504	-0.42053	0.64862	-1.27561	-0.71513	-0.21469	0.09205	1.58877	0.15183	0.23161	0.58846	-0.20793	1.16716	1.06611				99.4	1.72636	4.55992	2.50077	3.80707	4.21862	5.41512	4.56039	4.70083
	99.5	13.8883	12.5629	10.3113	11.1001	9.49812	7.48378	11.298	11.1828	12.1761	12.4024	12.7563	11.7805	12.1137	11.4347	10.9642	11.4933				99.5	-1.49851	-0.27075	-0.25209	-0.49772	0.13828	-1.03331	-0.83187	0.16349	1.23389	1.39195	0.05559	0.18533	-0.23024	-0.36096	0.59638	1.0185				99.5	2.77081	4.55468	2.79743	4.12354	4.14254	4.58667	4.52306	4.06573
	99.6	13.0565	12.5004	9.57375	10.918	10.0904	8.34384	11.748	11.8961	11.76	12.6257	12.3522	11.8078	12.9097	11.2438	10.4063	11.4808				99.6	-1.37166	0.43357	0.6444	-0.4691	-0.2516	-1.13854	-0.27989	0.37526	2.00149	0.95112	-0.19593	0.22261	-0.8928	-0.42651	0.08604	0.62445				99.6	4.09975	4.03962	3.94824	4.46481	4.54324	3.57953	4.14009	4.12353
	99.7	12.7708	12.6154	8.87407	10.9672	10.7164	8.98709	11.7587	11.8648	11.3609	11.7123	11.7206	11.5945	13.5715	11.1529	10.4463	11.327				99.7	-0.87011	1.41891	0.87875	-0.18189	-0.20902	-1.49845	0.51898	0.3647	2.10543	0.47145	-0.6428	0.00493	-1.09875	-0.66283	-0.06247	-0.05614				99.7	4.34925	3.09565	4.89899	4.85905	5.37717	2.94631	4.03845	4.23923
	99.8	12.8073	12.6402	8.5136	10.9079	11.0693	9.31486	11.2186	11.6533	11.1918	10.6186	11.4497	11.2829	13.5961	11.1936	11.19	11.1631				99.8	-0.23776	1.79334	0.6222	0.24744	-0.00611	-1.54857	0.80824	0.17556	1.84158	0.17547	-1.06006	-0.2432	-0.89099	-0.8439	0.05109	-0.72105				99.8	3.38952	2.55807	4.90229	4.74852	5.57609	2.87131	3.95171	3.99963
	99.9	12.9847	12.4475	8.51486	10.5743	11.3604	9.30641	10.6301	11.6247	10.9382	10.2576	11.6633	10.9568	13.1506	11.3008	12.1351	10.9358				99.9	0.13117	1.12655	0.32566	0.52446	-0.04031	-1.13589	0.50567	0.15825	1.63865	0.2536	-1.23033	-0.17514	-0.57166	-0.76561	0.01876	-1.0997				99.9	2.08017	2.88109	4.38572	3.66868	5.102	3.33179	3.52068	3.59166
	100	13.3466	12.0867	8.55867	10.5997	11.838	9.80034	10.6538	11.3498	10.5416	10.6636	12.256	10.6436	12.7971	11.2662	12.8663	10.6492				100	0.24451	-0.05687	0.09225	0.4899	-0.23475	-0.72042	0.17837	0.5242	1.241	0.59927	-1.23269	-0.13753	-0.18425	-0.52767	-0.32508	-1.0941				100	1.16337	3.75729	4.10696	2.56758	4.91725	4.13186	3.14393	3.25332
	100.1	13.7733	11.8085	8.60995	11.2541	12.0086	11.0937	11.3385	10.6422	10.5734	11.1648	13.1752	10.5272	12.5738	11.0893	13.0124	10.6501				100.1	0.34118	-0.71825	-0.17295	0.10168	-0.46535	-0.31863	-0.02875	0.71388	0.46235	0.7819	-1.10576	-0.41266	0.25895	-0.08188	-0.67626	-0.6594				100.1	0.81298	4.6248	4.01163	2.68122	5.17655	4.85611	3.14472	3.12628
	100.2	14.3661	11.895	8.96395	11.935	11.5443	11.6038	12.0923	10.1268	11.24	11.3491	14.2313	10.9612	12.2392	11.0176	12.3417	11.1643				100.2	0.3756	-0.39863	-0.42356	-0.3426	-0.53322	0.28437	-0.34832	0.22085	-0.07028	0.67203	-0.55848	-0.50829	0.59406	0.42006	-0.60275	-0.05731				100.2	0.98311	5.13732	3.73917	3.84637	5.39515	5.13723	3.28532	3.25567
	100.3	15.2248	12.1397	9.6224	12.1597	11.0142	10.5492	12.363	10.0381	11.8962	11.3775	14.9703	11.9337	11.9323	11.0656	11.4848	11.6668				100.3	0.11508	0.06527	-0.37284	-0.4764	-0.28304	0.87232	-0.55903	-0.53897	0.00148	0.54137	0.20021	-0.14988	0.79694	0.57809	-0.09831	0.22863				100.3	1.68172	5.174	3.28874	4.67665	5.60184	4.92652	3.30235	3.2807
	100.4	15.9313	12.1029	10.1815	11.8191	10.9126	9.24604	12.2247	10.0144	11.9624	11.4033	14.9037	12.7114	11.9528	10.9787	11.578	11.4762				100.4	-0.26747	-0.3155	-0.02341	-0.41719	0.04084	1.19	-0.32463	-0.91663	0.25349	0.4677	0.47457	0.00433	0.70543	0.48071	0.39464	0.03994				100.4	2.56002	4.91011	3.02501	4.24533	5.85491	4.73622	3.32776	3.088
	100.5	16.0301	11.9345	10.2292	11.1839	11.0394	8.49448	12.5052	10.1253	11.5249	11.2901	14.2053	12.7965	12.3391	10.5555	12.7712	10.9632				100.5	-0.31943	-1.0955	0.1845	-0.35636	0.22794	1.18524	0.15062	-0.64289	0.3327	0.07988	0.15732	-0.6099	0.11162	0.33163	0.43466	-0.17627				100.5	3.0614	4.7416	3.06692	3.2806	5.73561	4.94843	3.596	2.98266
	100.6	15.3705	12.1375	9.64302	10.6266	11.2784	7.877	13.6523	10.482	11.0381	10.9937	13.8053	12.5745	12.7825	10.1056	13.9012	10.9965				100.6	-0.06231	-1.12999	-0.12899	-0.40738	0.3295	0.86698	0.49182	0.27423	0.10316	-0.66982	-0.34948	-1.4546	-0.43631	0.03758	0.14211	0.13736				100.6	3.12205	4.77529	3.09669	2.76584	5.17707	5.33654	3.92768	3.25281
	100.7	14.0288	12.6868	8.94358	10.1735	11.8239	7.20672	14.9051	10.5812	10.8846	10.8949	14.0381	12.3895	12.9144	10.1989	13.9484	11.5113				100.7	0.16172	-0.46645	-0.81257	-0.66266	0.34706	0.34663	0.71671	1.28153	-0.36315	-1.12317	-0.69986	-1.73551	-0.39672	-0.2644	0.00857	0.91407				100.7	2.94566	4.68365	3.057	2.62137	4.75637	5.61402	3.96681	3.9742
	100.8	12.6921	13.2168	8.9178	9.87521	12.4435	6.83048	15.3493	10.3643	11.2568	11.2292	14.2195	12.016	12.724	10.8371	13.1493	11.5173				100.8	0.19645	-0.18819	-1.18097	-0.97658	0.12652	-0.03564	1.13134	1.61856	-0.65865	-0.97902	-0.5486	-1.46281	-0.1715	-0.26911	0.00128	1.50933				100.8	2.73658	4.34078	2.92867	2.69402	4.75291	5.43902	3.92437	4.62421
	100.9	12.0626	13.509	9.63693	9.84871	12.746	7.13624	15.0136	10.5304	12.0833	11.48	14.0303	11.3591	12.4934	11.4509	12.2626	10.7505				100.9	0.03208	-0.70828	-0.89754	-1.08963	-0.19711	-0.07364	1.55128	1.43532	-0.54957	-0.49395	0.23855	-0.93897	-0.12496	0.02466	-0.3828	1.4548				100.9	2.88027	3.94615	2.65419	3.28436	4.98992	4.48076	4.011	4.65608
	101	11.9423	13.6832	10.17	9.69628	12.6665	7.779	14.6596	11.1217	12.6977	11.0402	13.831	10.8712	12.3178	11.7422	11.5118	10.2332				101	-0.19695	-1.36243	-0.40383	-0.84122	-0.26489	-0.11306	1.44116	1.48537	-0.11079	0.16375	1.19807	-0.23821	0.0231	0.38074	-1.22052	0.87813				101	3.25212	3.55995	2.71791	4.09538	5.28239	3.19822	3.84902	4.11661
	101.1	11.8653	13.9231	9.65004	9.12797	12.2226	7.98005	14.6121	11.355	12.6728	10.0609	13.7066	11.1698	12.2209	11.906	10.908	10.6404				101.1	-0.28651	-1.45138	-0.06146	-0.33201	-0.21065	-0.64332	0.89494	1.86149	0.42186	0.76949	1.72753	0.31284	0.61114	0.54441	-1.77567	0.27775				101.1	3.31149	3.203	3.26674	4.40126	5.0914	2.54857	3.29778	3.33205
	101.2	11.7144	14.0386	8.6746	8.94029	11.5968	7.81138	14.375	10.9655	12.5066	9.31897	13.2523	12.1144	12.4361	12.1111	10.7913	11.3733				101.2	-0.09948	-0.7742	0.09946	0.043	-0.44853	-1.62446	0.4862	2.14405	0.699	0.88243	1.67213	0.34549	1.52534	0.42042	-1.42395	0.05187				101.2	2.91375	3.24199	3.77314	4.3368	4.23995	2.6443	3.05075	3.05178
	101.3	11.5147	13.5701	8.39931	9.99318	11.0887	7.97914	13.7896	10.6171	12.6101	9.55156	12.4823	12.7517	12.8217	12.3432	11.4272	11.586				101.3	0.35259	0.40975	0.00217	-0.07127	-0.75887	-2.33293	0.46619	2.04131	0.54314	0.49703	1.36829	0.05894	2.15193	0.2513	-0.59678	0.16044				101.3	2.33961	3.83714	4.04316	4.48389	3.57235	2.75495	3.62159	3.79571
	101.4	11.444	12.5083	8.64547	11.6093	10.8022	8.59563	13.2233	10.8726	12.7905	10.4226	12.0714	12.6118	12.9009	12.7898	12.3427	11.2868				101.4	0.5792	1.45472	-0.19224	-0.51293	-0.48051	-2.01412	0.55965	1.43778	0.18664	0.16187	1.08952	-0.30659	1.81628	0.29669	0.05436	0.3483				101.4	2.06166	4.2116	4.22289	4.53064	3.68499	2.39298	4.30768	4.73806
	101.5	11.9129	11.6655	8.52936	12.4214	10.4798	9.16894	12.7432	11.5315	12.9431	10.643	12.5479	12.3127	12.8719	13.4761	12.6925	10.8748				101.5	0.06309	1.82226	-0.10233	-0.69328	0.2776	-0.81223	0.27561	0.75862	-0.03702	0.04518	0.62829	-0.7721	0.66244	0.36287	0.44524	0.59388				101.5	2.21164	3.77769	4.33997	3.65498	4.31556	1.66969	4.5593	4.75685
	101.6	12.7798	11.6025	7.98444	12.4986	10.0537	9.32243	12.3711	12.2725	13.0329	9.79009	13.6921	12.3755	13.1727	13.7462	12.0603	10.5814				101.6	-0.8485	1.64666	0.19614	-0.44359	0.78946	0.20337	-0.37627	0.48364	-0.21836	-0.14378	0.06807	-1.14785	-0.25217	0.19369	0.56497	1.02756				101.6	2.30044	3.28669	4.19972	2.22609	4.91914	1.36882	4.95813	4.27846
	101.7	12.8869	11.9697	7.78155	12.7286	9.90823	9.10251	12.5181	13.0602	12.7403	8.83591	14.4617	12.5073	13.853	13.1521	10.9426	10.7501				101.7	-1.48546	1.4582	0.28389	-0.13853	0.98721	0.46771	-0.8445	0.29633	-0.54802	-0.24124	-0.00549	-1.31973	-0.26447	-0.01139	0.28116	1.54994				101.7	2.28716	3.6093	3.59399	1.57125	5.08355	2.1468	5.77987	4.56305
	101.8	11.6656	12.3305	8.28117	13.032	9.98471	8.9341	13.116	13.5053	11.9112	8.86692	14.2141	12.6065	14.7469	12.4256	10.5073	11.3676				101.8	-1.6102	1.24398	0.09421	0.11339	1.09904	0.51217	-0.81026	-0.18769	-0.8478	0.136	0.51853	-1.42822	0.0174	0.0622	-0.1866	1.82531				101.8	2.73304	4.31257	2.91025	1.90113	4.57921	3.46373	6.41242	5.48164
	101.9	10.5301	12.7619	8.74026	12.9163	9.84335	9.03929	13.3991	13.2027	10.9396	10.0841	13.5596	12.9662	15.0714	12.4168	11.0549	11.6121				101.9	-1.4112	0.67459	0.00382	0.41453	0.89349	0.70096	-0.51491	-0.78747	-0.96876	0.59125	1.01714	-1.28342	-0.27478	0.34351	-0.43227	1.63705				101.9	3.39827	4.61451	2.85464	2.02826	3.56928	4.35768	6.51503	5.8149
	102	11.0828	13.3858	8.30618	12.4193	9.80655	9.10739	13.3497	12.6024	10.5212	11.5582	13.1811	13.2132	14.1767	13.0517	11.4683	10.9508				102	-1.26026	-0.0135	0.19364	0.59292	0.4547	0.88165	-0.23381	-1.14922	-0.99391	0.60013	0.85105	-0.54345	-0.98976	0.58781	-0.40865	1.11631				102	3.2536	4.67806	3.3068	1.59476	2.90928	4.7765	5.63743	5.41163
	102.1	12.8233	13.9779	7.41517	11.8592	10.5786	8.91354	13.6174	12.1491	10.9135	12.1337	12.9764	12.8532	12.6711	13.7331	11.1627	9.92052				102.1	-1.3716	-0.54927	0.288	0.54273	0.3592	1.04568	0.15006	-1.14117	-0.92716	0.45357	0.15832	0.58586	-1.14094	0.69839	-0.39189	0.57398				102.1	2.2948	4.78798	3.49432	1.51408	3.17965	4.95625	3.5065	5.01436
	102.2	14.1228	14.12	7.36461	11.5296	11.5987	8.62268	14.0833	11.5162	11.4397	11.7248	12.6567	12.3247	11.4981	13.836	10.8333	9.3892				102.2	-1.54784	-1.18989	0.09008	0.5448	0.69755	1.01668	0.66814	-0.9169	-0.81968	0.42445	-0.44159	1.32576	-0.45846	0.49129	-0.35479	0.32187				102.2	1.78668	4.63251	3.21773	2.17898	3.69269	4.64977	1.64897	4.77721
	102.3	14.074	13.7146	8.1908	11.4721	11.8054	8.33901	14.2143	10.7191	11.2761	11.1229	12.2613	11.9276	10.8308	13.1546	11.0333	9.52582				102.3	-1.55294	-1.76774	-0.16406	0.67441	1.19062	0.42481	0.98023	-0.5914	-0.70358	0.18128	-0.62455	1.07904	0.21586	-0.2553	-0.07867	0.39802				102.3	2.32556	4.08752	3.07658	2.92967	3.80053	4.03622	1.51167	4.39454
	102.4	12.6437	13.4235	8.87223	11.4766	11.3948	8.13041	13.862	10.4589	10.6463	10.9579	12.1843	11.4229	10.6108	12.1647	11.3931	9.70545				102.4	-1.29106	-1.62906	-0.43791	0.70791	1.68195	-0.52748	0.82958	-0.13651	-0.46139	-0.33738	-0.34661	0.12194	0.49772	-1.18781	0.173	0.43644				102.4	3.1819	3.63852	3.53409	3.1705	3.76015	3.75825	2.33451	3.91131
	102.5	10.7662	13.7317	9.33764	11.5173	11.0625	8.39644	12.987	10.9598	10.5767	11.0883	12.6332	10.9365	10.9048	11.117	11.4198	9.50013				102.5	-0.68791	-0.93066	-0.66649	0.7954	1.9543	-1.08535	0.26368	0.34505	-0.3007	-0.64842	0.2515	-0.66886	0.71447	-1.66532	-0.13411	0.28364				102.5	3.62049	3.80928	4.36092	2.92677	3.71015	3.51862	2.8158	3.4479
	102.6	9.73808	14.0451	9.88623	11.8319	10.9889	9.02156	11.9096	11.6653	11.2106	10.9208	13.2794	10.7227	11.657	9.99482	11.3531	9.0784				102.6	0.08215	-0.52096	-0.62839	1.06834	1.72988	-0.85874	-0.44802	0.62478	-0.47548	-0.49069	0.67802	-0.70725	0.71659	-1.54667	-0.92314	0.35115				102.6	3.87652	4.55454	4.82423	2.52478	3.66139	2.77827	2.60304	2.83049
	102.7	9.69516	13.687	10.0452	12.3349	11.0843	9.17781	11.5429	12.1963	11.7132	10.3916	13.5594	10.8378	12.4252	9.21026	11.5496	8.73423				102.7	0.58688	-0.49588	-0.54893	1.02769	1.13562	-0.38976	-0.84704	0.68144	-0.72499	-0.08791	0.46251	-0.21239	0.24001	-1.11894	-1.6919	0.84974				102.7	4.20333	5.1579	4.48993	2.39299	4.00317	2.31368	2.05652	2.16205
	102.8	9.93832	12.9458	9.61526	12.4338	11.0088	8.57863	12.2453	12.6375	11.7872	9.79942	13.0927	11.288	12.7431	9.173	11.749	8.89447				102.8	0.45927	-0.37831	-0.75752	0.46543	0.71492	-0.36375	-0.4523	0.57589	-0.70834	0.22425	-0.32729	0.02964	-0.24353	-0.666	-1.97931	1.42819				102.8	4.41845	5.10135	3.90166	3.04873	4.62338	2.97095	1.89822	1.79648
	102.9	10.0295	12.577	9.39416	12.0272	10.5169	7.87661	13.2946	12.9581	11.7127	9.33779	12.1851	11.8124	12.7921	9.77309	11.5466	9.85331				102.9	-0.15991	0.00377	-0.93458	0.07043	0.59207	-0.83269	0.45484	0.43015	-0.30325	0.31089	-0.96078	-0.32744	-0.25087	-0.15019	-1.62752	1.6329				102.9	4.48846	4.74053	3.93136	4.34195	4.84397	4.20048	2.16002	1.848
	103	9.88437	12.7525	9.80971	11.599	10.1743	7.78312	13.9984	12.9153	11.77	9.24559	11.6659	12.0637	12.7674	10.6099	11.1606	11.1888				103	-0.66931	0.36266	-0.62341	0.18982	0.48188	-1.29996	0.87689	0.4098	0.43806	0.36765	-0.57561	-0.67383	0.2377	0.5038	-0.87819	1.54786				103	4.22055	4.74961	4.71386	5.22927	4.44509	5.08247	2.33021	2.29893
	103.1	9.5247	13.2843	10.3378	11.5721	10.836	8.21457	14.3902	12.5166	12.1989	9.55461	11.9419	12.197	12.4666	11.3087	11.2134	12.2721				103.1	-0.67777	0.20803	0.00188	0.29635	0.21019	-1.32871	0.34706	0.28552	1.02198	0.53903	0.71107	-0.79043	0.93114	0.91717	-0.00129	1.64023				103.1	3.57692	4.91786	5.5027	5.29758	3.64007	5.37304	2.70718	2.71027
	103.2	9.26351	14.0149	10.6049	12.1934	12.292	8.48714	14.5956	12.1907	12.7819	9.99246	12.5574	12.5379	12.0753	11.7231	11.7539	12.754				103.2	-0.30466	-0.49899	0.37322	-0.20069	-0.26611	-0.88824	-0.5415	-0.2912	1.01835	0.54164	1.9172	-1.01302	1.15862	0.73682	0.63484	1.94646				103.2	2.99314	4.56276	5.59552	5.32042	2.95479	5.21881	3.80786	2.34639
	103.3	9.50632	14.5014	10.7208	13.2064	13.2887	8.53128	14.56	12.1668	12.8809	10.249	12.7307	12.8475	11.9941	11.9784	12.2003	12.6088				103.3	-0.1297	-1.29368	0.44398	-1.18722	-0.66344	-0.19855	-0.95962	-1.16471	0.68033	0.30953	2.43685	-1.01604	0.49598	0.36584	0.66292	1.94849				103.3	2.84521	4.09933	5.07623	5.69357	3.16733	4.77011	4.96673	1.40017
	103.4	9.92531	14.4841	10.7954	13.5871	13.2034	8.82019	14.4783	12.1766	12.2213	10.2858	12.2106	12.7309	12.1313	12.1535	12.1906	12.2574				103.4	-0.66988	-1.69612	0.65357	-1.78687	-0.59797	0.30987	-0.70609	-1.95742	0.42556	0.32232	2.39522	-0.55509	-0.48424	0.51355	0.246	1.42512				103.4	3.1369	4.08701	4.50122	5.9366	4.43474	4.25576	5.17182	0.96227
	103.5	9.84178	14.2837	10.5056	12.8686	12.5397	9.15868	14.6649	12.0019	11.3805	10.4777	11.4947	12.299	12.0588	12.268	11.7182	12.1131				103.5	-1.32633	-1.53366	0.96197	-1.23948	-0.06109	0.29389	-0.01444	-2.2202	0.37367	0.73399	2.06979	-0.2175	-0.82279	1.14633	-0.3335	0.88673				103.5	3.29139	4.24445	4.14948	5.62058	5.80756	4.06672	4.51984	1.54359
	103.6	9.55573	14.1876	9.78096	12.1147	11.7499	9.18617	14.8061	11.7127	11.3778	10.8529	11.0504	11.9204	11.6941	12.4085	10.9078	12.0386				103.6	-1.16328	-0.92848	1.08991	-0.0396	0.59131	-0.05574	0.78431	-1.54039	0.60504	0.99212	1.69675	-0.46748	-0.39188	1.43393	-0.76412	0.86277				103.6	3.00393	4.39421	3.84635	4.95777	6.34932	4.18387	3.76135	2.62713
	103.7	9.85188	14.0118	9.41344	12.5205	10.9919	9.18039	14.307	11.5704	12.599	10.7798	10.8802	11.7007	11.4523	12.5912	10.195	11.6837				103.7	-0.43039	-0.24323	1.1016	0.5527	1.06862	-0.31026	1.03201	-0.33007	0.7312	0.69678	1.56171	-0.96249	0.14765	0.89659	-0.57472	1.24646				103.7	2.98323	4.59985	3.63572	4.5207	6.17324	4.12982	3.37877	3.47774
	103.8	10.5981	13.2156	9.83317	13.8392	10.837	9.50277	13.3714	11.7877	13.9925	10.2999	10.8738	11.5812	11.5308	12.6555	10.0369	11.0869				103.8	0.1011	0.1148	0.93692	0.18386	1.38063	-0.40017	0.18828	0.30692	0.14972	0.25339	1.50477	-1.24338	0.39474	0.04204	0.01149	1.4047				103.8	3.62767	4.65039	3.84543	4.53824	5.67877	3.79404	3.30928	4.00025
	103.9	11.1278	11.9015	10.611	14.6484	11.5626	10.0187	12.7108	12.2576	14.1906	10.1507	11.094	11.6879	11.6168	12.6224	10.3658	10.6831				103.9	0.26565	-0.01743	0.48561	-0.35018	1.50516	-0.28999	-1.06465	0.11192	-0.72204	0.05008	1.03346	-1.39845	0.4447	-0.43318	0.21975	1.06989				103.9	4.04484	4.33652	4.39085	4.85257	4.97331	3.69362	3.03919	4.36672
	104	11.1057	11.0209	10.9516	14.0904	12.4794	10.0441	12.5912	12.5035	13.0236	10.2353	11.5604	12.1689	11.4559	12.7662	10.7698	10.7453				104	0.32908	-0.3129	0.07591	-0.46535	1.27203	0.09855	-1.44254	0.06959	-0.99931	-0.16845	0.24508	-1.37996	0.44575	-0.39886	-0.07386	0.68916				104	3.62799	3.70536	4.84713	5.09219	4.03573	4.22208	2.50273	4.44896
	104.1	10.8051	10.9961	10.3257	12.808	12.699	9.29381	12.5839	12.0599	11.4315	10.1846	11.9627	12.705	11.1669	13.0727	11.0954	11.1565				104.1	0.12311	-0.29079	0.043	-0.41731	0.72021	0.42883	-0.72814	0.92491	-0.61049	-0.60442	-0.41062	-0.91906	0.33433	-0.05525	-0.42358	0.45241				104.1	3.18905	2.92194	4.94954	4.82151	3.14455	4.67808	2.25123	4.1492
	104.2	10.7112	11.225	9.48655	11.8568	12.2688	8.51376	12.3493	10.9759	10.4327	10.4198	12.1031	12.7553	11.1463	13.1012	11.6538	11.584				104.2	-0.74581	0.18037	0.1334	-0.52077	0.02211	0.4124	0.16406	2.07209	-0.10568	-0.94642	-0.86621	0.00669	0.13068	0.22063	-0.71335	0.1763				104.2	3.36151	2.34919	4.59055	4.15116	2.71433	4.2979	2.4619	3.59526
	104.3	10.7961	11.3671	9.72749	11.4636	12.1213	8.1918	12.2934	9.75546	10.4567	11.1768	12.3268	12.2866	11.7333	12.5004	12.3323	11.7415				104.3	-1.74502	0.80397	0.11244	-0.65555	-0.59258	0.3988	0.43716	2.28542	0.18947	-1.01441	-1.1433	1.1729	0.20224	0.03352	-1.08073	-0.01951				104.3	3.72857	2.32236	4.01126	3.55944	2.76843	3.66736	3.23503	3.0529
	104.4	11.1227	11.8746	11.18	11.2552	12.7388	7.90629	12.8262	8.93633	11.1166	11.7546	12.9051	11.7734	12.7904	11.6177	12.3199	11.6393				104.4	-1.92512	1.25556	0.16793	-0.60279	-0.81059	0.6563	0.25999	1.33377	0.2506	-1.04614	-1.06326	1.90286	0.64786	-0.51851	-1.38535	0.05396				104.4	3.77751	2.66596	3.61797	2.92537	3.03984	3.4601	4.32062	2.74275
	104.5	11.8517	12.7587	12.7966	11.2219	13.498	7.35162	13.5655	8.89369	11.3915	11.5354	13.1687	11.7284	13.6533	11.257	11.1719	11.3763				104.5	-1.38354	1.32709	0.2874	-0.36291	-0.69843	0.7561	0.34453	0.25223	0.08503	-1.0246	-0.49153	1.62273	0.94567	-0.90517	-1.65033	0.22986				104.5	3.73938	2.89376	3.4143	2.29295	3.25325	3.42094	4.86586	2.91646
	104.6	12.4189	13.2682	13.541	11.6034	13.4464	6.71315	13.8799	9.50618	10.7708	10.8468	12.4945	12.3181	13.7404	11.7621	9.6576	10.6645				104.6	-0.74885	0.85646	0.29725	-0.10607	-0.69184	0.29382	0.73352	-0.28091	-0.14057	-0.62783	0.37596	0.71143	0.75795	-0.71975	-2.00501	0.23844				104.6	3.9985	2.69178	3.27855	2.42813	3.4163	3.35222	4.76183	3.51094
	104.7	12.2704	13.01	13.2618	12.2398	12.6206	6.41065	13.354	10.0556	9.92104	10.4375	11.6066	12.8983	13.3345	12.5768	8.95079	9.41818				104.7	-0.24999	0.06634	0.45149	-0.04312	-0.8461	-0.23406	0.76178	-0.3886	-0.15158	-0.03969	1.11022	-0.00523	0.3348	-0.1995	-1.97233	-0.01231				104.7	4.19033	2.06146	3.22491	3.37051	3.90954	3.64271	4.63271	4.02871
	104.8	11.7075	12.2501	12.6076	12.6432	12.0795	6.90308	12.1359	10.1626	9.67513	10.5215	11.3968	12.6987	13.1251	12.9231	9.16129	8.52122				104.8	-0.0502	-0.61868	1.02419	-0.34958	-0.89889	-0.10354	0.13972	-0.15488	0.33373	0.08485	1.41387	-0.14885	0.17043	0.07006	-1.22817	-0.22148				104.8	4.07154	1.5986	3.26566	4.25062	4.7069	4.4069	4.58459	4.21084
	104.9	11.4238	11.4584	12.2	12.4167	12.421	8.12175	11.1301	10.06	10.1782	10.9188	11.7464	12.1612	13.1201	12.606	9.66481	8.79667				104.9	-0.36593	-1.02911	1.57777	-0.88955	-0.75955	0.37255	-0.61342	0.14458	1.21939	-0.38559	1.36101	0.07683	0.59371	-0.00816	-0.16073	0.14081				104.9	3.74737	1.88111	3.4136	4.61905	5.03101	5.16472	4.3915	4.12173
	105	11.7128	11.2461	12.2035	11.7606	13.0338	9.28007	11.2121	10.0184	11.0501	11.4738	12.2434	12.1994	12.8132	11.9427	10.1907	9.65487				105	-1.01979	-1.25657	1.39628	-1.13771	-0.59958	0.36327	-0.9022	0.15948	1.81906	-0.91473	1.22531	0.18622	1.19397	-0.08832	0.63032	1.00384				105	3.07746	2.76724	3.61898	4.55578	4.59761	5.65395	4.21449	3.82373
	105.1	12.2928	11.9477	12.2918	11.2926	13.1927	9.7297	12.2914	10.2882	11.7485	11.8292	12.6691	12.7635	12.1595	11.3698	10.7766	10.0593				105.1	-1.32692	-1.3941	0.57795	-0.82917	-0.47045	0.03572	-0.76638	0.15973	1.61849	-1.08091	1.07324	0.0404	1.23183	0.25611	0.76534	1.49284				105.1	2.26184	3.79168	3.89881	4.18804	4.06398	5.8123	4.39474	3.56713
	105.2	12.7338	12.9407	12.1749	11.3144	13.1804	9.53615	13.3652	10.8305	11.8933	11.7849	12.9099	13.4122	11.3809	11.2961	11.3366	10.0265				105.2	-0.97427	-1.41546	0.02228	-0.34095	-0.14906	0.01173	-0.50011	0.33148	0.82484	-0.86503	0.87417	0.06241	0.68088	1.1201	0.49974	1.16921				105.2	1.9718	4.51467	4.38264	3.79639	3.91924	5.27791	4.80862	3.63016
	105.3	12.8697	13.3214	11.9809	11.6138	13.76	9.09469	13.6192	11.2719	11.5283	11.6386	13.0015	14.1418	10.5407	11.5977	11.7494	10.159				105.3	-0.46547	-1.31939	0.21123	0.16113	0.35735	0.16401	-0.42265	0.26105	-0.04357	-0.51355	0.62309	0.34304	-0.06462	1.96694	0.57165	0.40295				105.3	2.28688	4.52601	4.95229	3.59076	4.27041	4.2415	5.03891	3.86172
	105.4	12.799	12.9568	11.6183	12.0384	14.9062	8.4731	13.2921	11.6123	11.355	11.5723	12.9692	14.5908	10.0375	11.7775	11.7569	10.5184				105.4	-0.28424	-1.15679	0.52637	0.81912	0.75619	0.02367	-0.60638	-0.02502	-0.49765	-0.25855	0.39649	0.11762	-0.60927	2.24918	1.13999	-0.37419				105.4	2.66671	4.04483	5.47845	3.34978	4.98971	3.49959	4.99	4.05524
	105.5	12.7686	12.2499	10.9238	12.6292	15.7254	7.66659	13.3015	12.1326	11.9331	11.3534	12.7091	14.1339	10.4474	12.0859	11.1407	10.7873				105.5	-0.35767	-0.99921	0.21724	1.37558	0.85673	-0.52329	-0.66875	0.08305	-0.32819	-0.17608	0.41076	-0.8129	-0.68376	2.10098	1.36766	-0.69134				105.5	3.06722	3.94418	5.55165	3.07739	5.54133	3.15336	4.90844	4.28606
	105.6	12.9873	11.6591	10.3485	13.3183	15.6506	7.1257	14.1305	12.6689	12.7029	10.9801	12.1805	13.1661	11.6199	12.9417	10.4251	10.9651				105.6	-0.5386	-0.88438	-0.34909	1.48091	0.78496	-1.17408	-0.29599	0.4782	0.20607	-0.55843	0.61743	-1.46273	-0.38574	1.91994	0.80317	-0.29199				105.6	3.66347	4.49762	4.76233	3.1711	5.26147	2.65481	5.09902	4.51692
	105.7	13.1606	11.4789	10.5433	13.7699	14.7381	7.23166	15.3382	12.7322	12.9593	10.9649	11.6847	12.5469	12.7534	13.7988	10.458	11.3164				105.7	-0.94019	-0.75519	-0.47635	1.23525	0.85519	-1.42834	0.38802	0.41197	0.49195	-1.38559	0.72061	-1.3728	0.037	1.65557	0.17153	0.36249				105.7	4.14678	4.90623	3.72793	3.67597	4.24104	1.86597	5.54225	4.63069
	105.8	12.8994	11.5071	11.2952	13.6149	13.3772	7.66736	15.9801	12.1319	12.6883	11.4975	11.6771	12.4529	13.2422	14.0525	11.29	11.8046				105.8	-1.46994	-0.41566	-0.26605	0.86727	0.96076	-1.03861	1.01642	0.03363	0.33818	-1.80147	0.71389	-1.06437	0.27745	1.09315	0.01887	0.63618				105.8	4.29928	4.28107	3.18327	4.17171	3.46218	1.33413	6.1245	4.60563
	105.9	12.6191	11.3263	11.8062	13.0989	12.2827	7.97452	15.4689	11.153	12.1493	12.0216	12.2976	12.7202	13.1282	13.811	12.0288	12.2687				105.9	-1.84314	-0.03438	0.002	0.35243	0.7068	-0.23991	1.18286	0.14308	0.1987	-1.26461	0.7709	-0.89683	0.21533	0.46751	0.1066	0.45458				105.9	4.55866	2.71074	3.11023	4.3048	3.31984	1.75134	6.59147	4.357
	106	12.9514	10.595	12.0465	13.0039	11.8527	8.26535	14.174	10.4534	11.6177	12.0053	13.2599	13.0913	12.8328	13.2112	11.9529	12.5307				106	-1.84199	-0.17496	0.3463	-0.23589	0.29189	0.44878	0.77622	0.53357	0.31781	-0.12077	0.73883	-0.84674	0.21274	0.07643	0.24058	0.10517				106	5.00041	1.51173	3.19405	4.04083	3.24063	2.82778	6.45326	4.14697
	106.1	13.7684	9.49481	12.5052	13.4587	11.8081	8.8314	12.9243	10.5106	11.3764	11.4159	14.161	13.3212	12.6717	12.4145	11.3444	12.3797				106.1	-1.12102	-0.78303	0.751	-0.54111	0.29648	0.66681	0.13065	0.3992	0.56887	0.90711	0.30401	-0.7713	0.55635	-0.11215	0.52179	-0.2303				106.1	4.86476	1.5556	3.13499	3.53629	2.85706	3.5707	5.86377	4.23615
	106.2	14.4221	8.76933	12.8625	13.518	11.9504	9.31851	12.5043	11.0132	11.6289	10.5487	14.5511	13.5912	12.8973	11.5512	10.8951	11.9637				106.2	0.21963	-1.21663	1.09273	-0.57458	0.64114	0.61578	-0.34153	-0.30099	0.92358	1.18833	-0.42613	-0.41178	1.01846	-0.13386	0.80764	-0.46296				106.2	4.02962	2.32371	3.22334	2.88513	2.49891	4.03814	5.24273	4.46257
	106.3	14.6356	8.65399	12.3555	12.6802	12.446	9.16742	13.1608	11.3086	12.1974	9.57916	14.2269	13.8829	13.4861	10.6662	10.8941	11.618				106.3	1.23079	-1.09843	1.29583	-0.72461	0.54589	0.94261	-0.29399	-0.88385	1.31852	0.745	-0.80985	0.19951	1.26319	0.11879	0.75169	-0.35384				106.3	3.28361	2.98219	3.94854	2.21647	2.80765	4.98413	4.44603	4.73568
	106.4	14.7582	8.94944	11.3909	11.8433	13.3223	8.52806	14.0737	11.1059	12.7634	8.6693	13.5194	13.6485	13.7045	10.1919	11.3029	11.3774				106.4	1.31698	-0.48658	1.14796	-1.10284	-0.14562	1.63184	0.33979	-0.90193	1.41078	0.06331	-0.5542	0.48693	1.18463	0.62816	0.36714	0.0454				106.4	3.09098	3.30487	4.68779	1.79665	3.7945	6.10602	3.3768	4.84894
	106.5	15.0329	9.47118	11.014	11.9313	14.1417	7.99104	14.1359	10.4688	13.2322	8.37243	12.8277	13.1059	13.0825	10.4062	11.7735	11.1358				106.5	0.90713	0.25825	0.51315	-1.37245	-0.55876	1.78957	0.86164	-0.54482	0.92549	-0.60012	-0.10758	0.10972	0.90366	1.15332	-0.06502	0.25162				106.5	3.50468	3.61248	4.73579	1.85877	4.63005	6.41397	2.64884	4.46114
	106.6	15.1913	9.74371	11.1675	12.6804	14.129	7.99299	13.265	9.9032	13.5498	8.84612	12.1152	13.1766	12.2566	10.9855	12.0025	11.0032				106.6	0.47492	0.77025	-0.00496	-1.29576	-0.37028	1.00017	0.50716	-0.19159	0.18837	-0.9465	0.32889	-0.50416	0.71156	1.48583	-0.34644	0.2286				106.6	4.29106	4.17921	4.5466	2.40553	4.68724	5.73099	2.84617	3.81085
	106.7	15.1335	9.62503	11.1602	13.2157	13.2387	8.30276	12.4287	10.1517	13.6408	9.46132	11.4164	13.8585	11.7809	11.7056	12.0605	11.1034				106.7	-0.14603	1.03273	0.18406	-0.95323	-0.19808	-0.15997	-0.28361	-0.12046	-0.08881	-0.69753	0.9751	-0.75148	0.6756	1.63339	-0.58188	0.26593				106.7	4.70347	4.87755	4.41649	2.9753	4.12584	4.74	3.71857	3.43374
	106.8	15.0777	9.67821	10.7858	13.1174	12.4502	8.55594	12.2989	11.2474	13.3279	9.77096	11.1753	14.1736	11.6356	12.4141	12.0204	11.1537				106.8	-0.76201	1.09825	0.61461	-0.49397	-0.13125	-0.91152	-0.58839	-0.35783	0.34809	-0.37783	1.43221	-0.45057	0.30009	1.70397	-1.01532	0.44623				106.8	4.10171	5.16686	4.13723	3.11872	3.31931	3.89074	4.44061	3.36008
	106.9	15.1619	10.1718	10.2389	12.718	12.2836	9.19815	12.5273	12.3751	12.6159	10.083	11.5722	13.7474	11.7789	12.6971	11.6275	10.9017				106.9	-0.60052	0.94607	0.57935	-0.14051	0.03506	-1.04355	-0.42252	-0.57297	0.94258	-0.71629	1.18911	0.10686	-0.54328	1.70725	-1.47062	0.67448				106.9	2.87048	4.82846	4.03336	3.23093	2.66139	3.24888	4.48743	3.26641
	107	15.4947	10.6223	9.95975	12.5483	12.3174	10.5011	12.6395	12.8495	12.0361	10.8157	12.1916	13.2726	12.1308	12.6797	10.9615	10.5536				107	0.06064	0.62161	0.14561	0.05866	0.03051	-0.82258	-0.26433	-0.49272	1.06304	-1.46481	0.58739	0.46286	-1.08486	1.58653	-1.45254	0.60912				107	2.05864	4.28676	4.33673	3.65668	2.69829	3.17739	4.22735	3.13108
	107.1	16.1092	10.788	10.2611	12.7091	12.2246	11.4755	12.6711	12.6711	12.0397	11.8728	12.6934	13.3021	12.511	12.8179	10.6171	10.3173				107.1	0.39818	0.32562	-0.08754	0.26031	-0.13145	-0.37103	-0.19447	-0.22571	0.72878	-1.77505	0.11045	0.25492	-0.91956	1.22015	-0.82581	0.17736				107.1	2.1638	3.95638	4.55918	3.934	3.60892	3.66083	4.23648	3.25865
	107.2	16.51	10.943	10.8376	12.8318	11.996	10.8456	12.788	12.4067	12.4026	12.7823	13.1318	13.5741	12.7841	12.9672	10.8527	10.2771				107.2	0.54875	0.14425	0.11762	0.3597	-0.11218	0.23398	-0.18082	0.14046	0.4171	-1.34586	-0.35378	-0.44507	-0.45193	0.61888	-0.12985	-0.0533				107.2	2.77996	3.78115	4.62739	3.94749	4.75745	4.04066	4.49807	3.63704
	107.3	16.1915	11.1723	11.3508	12.4877	11.706	8.99622	13.0737	12.7797	12.6108	13.115	13.3332	13.6105	12.9077	12.9679	11.3928	10.5971				107.3	0.64728	-0.20044	0.40567	0.11036	-0.05304	0.53976	-0.29516	0.6032	0.34708	-0.60645	-1.05441	-0.9434	-0.11662	0.11504	0.13382	0.11726				107.3	3.38922	3.45395	4.7955	4.14261	5.22335	4.18482	4.77325	4.12799
	107.4	15.2897	11.4873	11.8321	12.007	11.5244	7.66819	13.4925	13.7169	12.5034	12.8246	12.8219	13.4039	12.9034	13.0283	11.7592	11.2176				107.4	0.21255	-0.79864	0.45796	-0.33355	-0.08445	0.36237	-0.51282	1.03505	0.26953	-0.07229	-1.54969	-0.68934	-0.0823	0.16341	0.08494	0.12132				107.4	3.78739	2.98545	4.76034	4.33283	4.92774	4.46869	5.17211	4.8861
	107.5	14.4111	11.7507	12.1276	12.2715	11.53	7.72835	14.0228	14.2125	12.426	12.3415	11.9342	13.4469	12.8534	12.9633	11.5691	11.9121				107.5	-0.59482	-1.32888	0.34536	-0.50493	0.15613	0.13349	-0.75819	1.18277	0.15984	0.04953	-1.29024	0.02009	-0.4368	0.83678	-0.14366	-0.2052				107.5	3.77733	2.69282	4.29984	4.12211	4.33956	4.89269	5.71283	5.73179
	107.6	14.1685	11.6408	11.8328	13.0895	11.5884	8.58197	14.5444	13.7268	12.7775	12.2491	11.6639	13.916	12.7846	12.4784	10.9119	12.4749				107.6	-0.91284	-1.38133	0.2325	-0.23218	0.67185	-0.06749	-0.92125	0.88489	0.28653	-0.04326	-0.76801	0.45881	-0.95912	1.68729	-0.64372	-0.40679				107.6	3.45538	2.70701	3.90006	3.90962	3.84602	5.09442	6.14677	6.08646
	107.7	14.3488	11.371	11.0773	13.3502	11.7409	9.06907	14.6383	13.0642	13.4542	12.393	11.9529	14.3172	12.4974	11.9099	10.3126	12.6883				107.7	-0.45937	-0.76914	0.29123	0.15501	0.98836	-0.45132	-0.81895	0.5436	0.52433	0.11706	-0.64019	0.47173	-1.12655	2.03524	-1.10658	-0.28212				107.7	3.3375	3.25635	4.04459	4.04203	3.9141	4.87731	6.48915	5.64666
	107.8	14.0227	11.2544	10.5223	12.6941	12.0853	8.54081	14.2856	12.9189	13.77	12.2551	11.9443	14.1159	12.181	11.5059	10.2871	12.6035				107.8	-0.04651	0.10587	0.5692	0.29884	0.92936	-0.61965	-0.396	0.59862	0.52843	0.52583	-0.68856	0.60392	-0.77821	1.52958	-0.95155	0.0409				107.8	3.56763	4.26149	4.30288	4.29585	4.53073	4.39603	6.78676	4.5905
	107.9	13.0373	11.2722	10.4614	11.8333	12.294	7.58975	13.8843	12.8122	13.0828	11.9142	11.6624	13.2956	12.2484	10.8974	10.9232	12.3433				107.9	-0.41669	0.46563	0.86188	0.13718	0.6	-0.20654	0.13268	0.6872	0.36677	0.61828	-0.5913	0.91619	-0.28586	0.37418	-0.2358	0.53258				107.9	3.78413	4.73097	3.86762	4.46737	4.84707	3.9515	6.70006	3.68405
	108	12.2879	11.5258	10.6386	11.5951	12.0141	7.22729	13.287	12.2721	11.7768	11.583	11.5612	12.3864	12.4275	10.1212	11.9655	11.917				108	-1.32695	-0.01055	0.97726	-0.12005	-0.11902	0.47292	0.51649	0.24728	0.40732	0.27102	-0.35396	0.81249	-0.11374	-0.83969	0.39776	1.05027				108	3.79914	4.37263	3.08879	4.49868	4.21974	3.84709	5.97613	3.65553
	108.1	12.1907	12.0826	10.7705	11.8511	11.5054	7.89621	12.4545	11.6168	11.0889	11.1148	11.4947	12.0858	12.293	9.89856	12.8634	11.3359				108.1	-1.97401	-0.97164	0.81453	-0.38621	-1.02834	1.05912	0.8075	-0.4967	0.66471	-0.08146	0.14489	0.23564	-0.35103	-1.41078	0.74133	1.23092				108.1	3.60195	4.0505	2.76737	4.41278	3.06316	3.93533	4.69934	4.16221
	108.2	12.4315	12.6175	10.8597	11.7529	11.3154	9.10905	12.2041	11.1714	11.5324	10.6221	11.2309	12.4349	12.1418	10.5071	13.1777	10.5611				108.2	-1.66536	-1.88947	0.39484	-0.69004	-1.18141	1.38615	1.14508	-0.87092	0.69414	-0.23253	0.86411	-0.22617	-0.52568	-1.11597	0.8782	0.86988				108.2	3.15266	4.0836	2.5967	4.44924	2.56205	4.05473	3.25293	4.36901
	108.3	12.6753	12.8366	11.1107	11.2001	11.5607	9.69671	12.8454	10.8838	12.27	10.459	10.9879	12.8367	12.3727	11.4325	12.6749	9.54389				108.3	-0.46757	-2.33934	0.00357	-0.76121	-0.28068	1.31842	1.30313	-0.69637	0.34734	-0.50329	1.16899	-0.28155	-0.19541	-0.48533	0.51752	0.0952				108.3	2.90469	4.20008	2.4264	4.59885	3.28416	4.51178	2.49332	4.11482
	108.4	12.8266	12.8335	11.585	10.8377	11.7938	9.08623	13.5235	10.8267	12.5798	10.6942	11.2561	12.9451	12.5432	11.9674	11.2634	8.57532				108.4	0.61006	-2.18576	-0.14537	-0.4215	0.59111	1.02635	0.84488	-0.28219	-0.1165	-1.24305	0.82692	-0.21597	0.44505	-0.15364	-0.27766	-0.59633				108.4	3.43821	4.36651	2.84954	4.53043	4.37727	5.07362	2.72929	3.73169
	108.5	13.2075	12.864	11.9978	10.9203	11.5194	8.06006	13.7659	11.1321	12.6717	11.1022	12.0899	12.8926	11.9701	11.8795	9.68344	8.0554				108.5	0.71712	-1.62913	-0.21378	0.00906	0.55592	0.98625	-0.10979	0.10354	-0.60143	-2.04035	0.48719	-0.17317	0.85771	-0.13923	-0.8206	-0.71787				108.5	4.20916	4.65431	3.74139	4.27192	4.83955	5.12533	3.05341	3.51341
	108.6	13.8817	13.0337	12.215	11.3009	10.988	7.48889	13.9941	11.6081	12.7225	11.4182	13.026	13.0554	10.8405	11.4466	9.10605	8.01773				108.6	0.18164	-0.91406	-0.20339	0.10541	0.000325725	1.37722	-0.81444	0.35642	-1.09246	-2.14166	0.38397	0.15839	0.8362	-0.10769	-0.75737	-0.43344				108.6	4.03732	4.70261	4.19651	4.08122	4.61127	4.85491	3.06843	3.60501
	108.7	14.2409	13.1644	12.2916	11.7818	11.111	7.40958	14.3744	11.737	12.3702	11.5302	13.7492	13.5569	9.75454	11.1492	9.79148	8.49738				108.7	-0.23962	-0.30049	0.12975	-0.07771	-0.34865	1.67377	-0.97197	0.45495	-1.30401	-1.54907	0.20315	1.04442	0.56377	0.17743	-0.47145	-0.25272				108.7	2.69866	4.25783	4.18616	3.90425	4.23695	4.46238	3.4696	3.87228
	108.8	13.978	12.8531	12.0978	12.2944	12.2152	7.42899	14.5761	11.35	11.5469	11.6728	14.0674	13.9428	9.203	11.3026	11.0004	9.41217				108.8	-0.48622	-0.00641	0.54105	-0.08886	-0.258	1.04124	-1.00772	0.3055	-0.8445	-0.89698	0.17891	2.05119	0.33439	0.78471	-0.38748	-0.19909				108.8	1.1355	3.5381	4.3075	3.62272	3.93858	3.64002	4.40816	3.85455
	108.9	13.6061	12.1298	11.6303	12.8819	13.4512	7.03828	14.4407	11.0194	10.9276	11.9585	13.8814	13.9932	9.73827	11.7448	11.9354	10.1464				108.9	-0.87143	-0.00773	0.67998	0.10387	0.07106	-0.40926	-1.15926	-0.0599	0.01272	-0.72455	0.58286	2.15599	0.26253	1.48929	-0.43256	0.14879				108.9	0.58317	2.87978	4.23156	3.29009	3.65709	2.74297	5.31483	3.26467
	109	13.7107	11.5485	11.2988	13.4	13.8514	6.48421	14.5024	11.1063	11.0936	12.1381	13.3558	14.0201	11.3547	12.2325	12.3226	10.3338				109	-1.19736	-0.09413	0.70366	0.005	0.09792	-1.34163	-1.14854	-0.38151	0.5879	-1.00962	0.95895	1.11012	0.22063	1.79384	-0.28596	0.89961				109	1.57721	2.49199	3.53752	3.12085	3.71525	2.80546	5.73668	2.66676
	109.1	14.3217	11.45	11.3292	13.6681	13.4844	6.53803	15.0953	11.4502	11.6944	12.3155	12.8114	14.0084	12.9653	12.7117	12.3731	10.4051				109.1	-1.0594	-0.23793	0.6356	-0.49667	-0.346	-1.20941	-0.65762	-0.58644	0.87936	-1.15524	0.85547	-0.01715	0.03286	1.38088	0.11784	1.55802				109.1	3.35991	2.31786	3.31654	3.22341	4.32437	4.1473	5.53666	2.74843
	109.2	14.9193	11.6632	11.2795	13.8382	13.1608	7.00806	15.3778	11.8108	11.7843	12.4457	12.4436	13.6271	13.3828	12.9757	12.4725	10.7879				109.2	-0.70205	-0.60838	0.3852	-0.93163	-0.73537	-0.8115	0.17343	-0.71424	1.1318	-0.87166	0.57834	-0.3259	-0.36573	0.54029	0.34485	1.641				109.2	4.76617	2.21317	4.45148	3.49345	5.04644	5.74056	4.91843	3.21533
	109.3	14.831	11.7372	10.8234	14.1319	13.1703	7.01471	14.619	11.822	11.2179	11.9761	12.136	12.9697	12.8328	12.7471	12.6461	11.2194				109.3	-0.52265	-0.8435	0.01465	-0.91297	-0.64929	-0.38311	0.89239	-0.62271	1.09753	-0.48547	0.58877	-0.01089	-0.93609	-0.18088	-0.02176	1.08525				109.3	5.54682	2.4853	5.74563	3.81483	5.11382	6.30353	4.34396	3.38813
	109.4	14.086	11.516	10.5293	14.3505	13.064	6.61225	13.4084	11.3977	10.7668	11.1465	11.9344	12.5481	12.532	12.302	12.4771	11.2615				109.4	-0.46814	-0.23637	-0.38507	-0.56667	-0.21451	0.46272	1.12495	-0.3345	0.68538	-0.2424	0.75104	0.35692	-1.38643	-0.55688	-0.55036	0.07399				109.4	5.77952	3.35912	5.82801	4.22986	4.27258	5.75504	4.24129	3.32483
	109.5	13.722	11.1499	10.8627	13.9571	12.9801	6.40282	12.81	10.9431	10.7418	10.9274	12.1215	12.8288	12.6242	12.3457	11.9714	10.862				109.5	-0.45082	0.97803	-0.58937	-0.28271	0.13193	1.33047	0.68792	-0.31687	0.20112	-0.17919	0.62061	0.49022	-1.34633	-0.63929	-0.55257	-0.93425				109.5	5.24922	4.04279	5.0153	4.85855	3.07718	4.96645	4.65887	3.63379
	109.6	14.4194	10.6684	11.2206	12.8402	13.3929	6.50831	13.0953	10.7641	10.7285	11.5125	12.5968	13.6177	12.2452	13.014	11.6109	10.3747				109.6	-0.23136	1.89559	-0.29473	-0.07479	-0.08659	1.41956	-0.01511	-0.67426	-0.02766	-0.14722	0.17559	0.36422	-0.69259	-0.71722	-0.27052	-1.54343				109.6	4.31974	3.80549	4.14359	5.48257	2.3641	4.5158	5.10107	4.58339
	109.7	15.424	10.3185	11.188	11.7325	13.7173	7.0956	13.4914	10.9607	10.6658	12.4411	12.8347	14.2196	11.509	13.6299	11.7428	10.266				109.7	0.42743	2.01042	0.49684	0.41897	-0.74455	0.83615	-0.26909	-0.65931	0.26446	0.12762	-0.17285	0.29814	0.23488	-0.93331	-0.21673	-1.78502				109.7	3.73318	3.09163	3.45382	5.77763	2.71697	4.62313	5.15282	5.89067
	109.8	15.7842	10.4088	11.3091	11.602	13.1945	8.0852	13.2875	11.5442	10.8423	13.1729	12.6166	14.2912	11.3581	13.5071	12.2543	10.5638				109.8	0.99967	1.30416	0.98956	1.16193	-0.93441	0.44255	-0.0763	-0.13736	0.98167	0.48667	-0.16918	0.66374	0.86865	-1.00955	-0.0924	-1.48743				109.8	3.51187	2.6996	2.77626	5.58953	3.83307	5.26517	4.7498	6.602
	109.9	15.5444	10.5933	11.9801	12.6053	12.2338	8.95072	12.9514	12.443	11.0597	12.9951	12.2753	13.9412	11.7842	12.5411	12.6106	10.7886				109.9	1.0557	0.37162	0.52705	1.70265	-0.24545	0.64772	0.25691	0.13693	1.63178	0.46636	0.06877	1.09378	0.98854	-0.83743	0.37907	-0.3292				109.9	3.40087	3.15668	2.02749	5.13756	4.53506	5.58838	4.02364	5.58486
	110	15.3032	10.5544	12.9223	13.4486	11.6331	9.46014	13.3534	13.15	11.0385	12.0065	12.1156	13.5012	12.0075	11.2021	12.5729	10.7671				110	1.02154	-0.0073	-0.31113	1.70461	0.64865	0.99485	0.73878	-0.0807	1.66357	0.16784	0.1887	1.05939	0.67648	-0.76534	0.59504	1.05377				110	3.36836	4.25763	1.55594	4.96477	4.35464	4.95917	3.47731	3.51047
	110.1	15.1804	10.6022	13.47	12.9836	11.5784	9.428	14.227	12.9599	10.8397	11.3701	12.2076	13.2669	11.9518	10.0745	12.4568	10.8669				110.1	1.06987	0.18477	-0.75608	1.15525	1.14263	0.94941	1.20928	-0.565	0.95629	0.19955	-0.04917	0.80223	0.11349	-0.99695	0.2558	1.52255				110.1	3.40047	5.03657	1.55559	5.22399	4.14711	3.96416	3.64621	2.51133
	110.2	14.8618	10.8408	13.139	11.9142	11.6904	8.65524	14.7534	12.2094	10.6644	11.592	12.6954	13.2772	12.0006	9.68466	12.4542	11.1389				110.2	0.87153	0.4027	-0.75369	0.36368	1.34285	0.72912	1.32101	-0.9548	0.01822	0.72136	-0.37855	0.66367	-0.42259	-1.15269	-0.00183	0.9495				110.2	3.50155	4.856	1.81423	5.50939	4.49617	3.33135	4.27664	2.98813
	110.3	14.0235	10.7756	12.2096	11.3022	11.669	7.68193	14.6342	11.7297	10.6202	12.1103	13.4246	13.4246	12.1384	10.3948	12.4305	11.1576				110.3	0.63132	0.18988	-0.39374	-0.08782	1.367	0.72836	1.04107	-0.7617	-0.46978	1.15799	-0.37627	0.62492	-0.73135	-0.90474	0.37171	0.08363				110.3	3.68424	4.04992	2.28573	5.21604	4.84634	3.13521	4.43505	3.63372
	110.4	12.6323	10.346	11.3739	11.085	11.6233	7.4685	13.8844	11.2857	10.5321	12.5121	13.8013	13.4757	12.407	11.6683	12.2484	10.9322				110.4	0.70073	-0.58295	0.04452	0.22891	1.03963	0.8218	0.65306	-0.03057	-0.20639	0.90088	-0.18499	0.67364	-0.84467	-0.33898	0.97046	-0.57281				110.4	3.90037	3.34468	2.96605	3.95467	4.3632	2.72107	3.92954	3.83319
	110.5	11.4748	10.2579	11.0697	10.9237	11.7449	8.1253	13.1677	10.4084	10.4107	12.9218	13.6122	13.3157	12.8452	12.4079	11.9292	11.0399				110.5	0.69868	-1.61984	0.08888	0.806	0.47878	0.83947	0.53457	0.80613	0.47713	0.13183	-0.17278	0.75438	-0.63488	0.40267	0.97279	-0.86661				110.5	4.23013	3.03111	3.73261	2.43268	3.3197	1.67758	3.51751	3.89355
	110.6	11.4457	10.8829	11.2743	10.945	12.2041	8.68072	13.468	9.65376	10.4509	13.4218	13.1311	13.1615	13.1396	12.2285	11.5657	11.5303				110.6	0.19627	-2.21297	-0.09485	0.76674	0.09359	0.82451	0.8756	1.40779	0.83165	-0.34339	-0.19138	0.77051	0.04722	1.09706	0.42135	-0.77565				110.6	4.61755	2.98958	4.45263	2.05147	2.85985	0.74169	3.4755	4.09898
	110.7	12.3236	11.4888	11.4997	11.4493	13.1901	8.35592	14.4098	9.7051	10.4758	13.6555	12.5842	13.2608	13.1031	11.6352	11.499	11.6395				110.7	-0.46031	-1.89341	-0.20323	0.13342	-0.07694	0.73136	1.33089	1.24448	0.3822	-0.21497	-0.04078	0.69113	0.66705	1.42961	0.03804	-0.52265				110.7	4.52599	3.11822	5.223	3.15058	3.1403	0.71846	3.40402	4.24353
	110.8	13.3553	11.1531	11.4134	12.311	14.4421	7.49647	14.6563	10.256	10.4129	13.3364	12.2005	13.4753	12.7088	11.3426	11.9152	11.06				110.8	-0.66058	-1.20698	-0.31307	-0.37307	-0.15267	0.46907	1.38882	0.07898	-0.50225	-0.02836	-0.06443	0.50326	0.68246	1.25432	0.08885	-0.3738				110.8	3.81692	3.40236	5.94415	4.59347	3.46793	1.61079	3.11219	4.03597
	110.9	14.4744	10.153	11.0742	13.0051	15.1545	6.83	13.9146	10.7816	10.6965	12.6321	12.0172	13.6689	12.0409	11.5826	12.5626	10.4536				110.9	-0.33472	-0.98749	-0.27328	-0.22556	-0.06814	0.09339	1.00716	-1.33188	-0.95724	-0.17065	-0.5241	0.38489	0.26901	0.79166	0.24782	-0.44592				110.9	3.2364	3.58927	5.93002	4.98466	3.78626	2.74911	2.72738	3.839
	111	15.5091	9.44364	10.6972	13.3251	14.87	6.59442	13.1265	11.2189	11.3789	11.8446	11.7368	13.8619	11.5383	11.7661	13.331	10.4323				111	0.10735	-1.16923	-0.07972	0.63975	-0.11571	-0.15494	0.55257	-2.07145	-0.66184	-0.40547	-1.13231	0.44064	-0.09991	0.40569	0.05478	-0.72969				111	3.03371	3.36975	5.11669	4.00398	4.24133	3.2888	2.81282	3.96701
	111.1	15.6225	9.23921	10.576	13.4332	14.1098	6.63566	13.0057	11.4702	11.8201	11.2408	11.7137	13.8956	11.4953	11.4641	13.9597	10.8462				111.1	0.284	-1.1218	-0.1114	1.66707	-0.68588	-0.15632	0.11322	-1.96503	-0.05048	-0.42226	-1.58945	0.39046	-0.21547	0.30751	-0.47584	-0.98406				111.1	2.82368	2.92577	4.28694	2.59015	4.57778	2.96124	3.71639	4.15832
	111.2	14.8051	9.37062	10.6124	13.471	13.4856	6.7894	13.3359	11.6608	11.6396	10.8205	12.7274	13.5496	11.7002	11.0973	13.7894	11.305				111.2	0.19904	-0.73316	-0.45748	1.77375	-1.38727	-0.12106	-0.40794	-1.32045	0.42533	-0.03652	-1.87394	0.14622	-0.15839	0.53488	-0.5994	-0.76715				111.2	2.79855	2.74905	3.85822	1.94295	4.74637	2.50151	4.78289	4.34706
	111.3	14.1572	10.0091	10.499	13.4045	13.0592	7.20641	13.5992	12.2888	11.4044	10.3811	14.2015	12.8038	11.9444	10.9029	13.0084	11.574				111.3	0.13871	-0.25661	-0.70597	0.74775	-1.48535	-0.14025	-0.63821	-0.68846	0.62133	0.47456	-1.97767	-0.00122	0.00772	0.84176	-0.1546	0.04485				111.3	3.29749	3.24335	3.89924	2.41097	4.89369	2.61074	5.32362	4.73118
	111.4	14.2393	11.0324	10.6515	13.0438	12.7691	7.96765	13.6662	13.1992	11.6481	9.92779	14.717	12.1283	12.3198	10.7674	12.5514	11.4241				111.4	0.08355	0.24668	-0.4706	-0.45955	-0.90184	0.03221	-0.14851	-0.57026	0.68742	0.37743	-1.88168	0.03153	0.2707	0.87331	0.08252	0.88126				111.4	4.02266	3.90733	4.3904	3.6703	4.77572	2.93869	5.46119	4.95826
	111.5	14.5794	11.8032	11.5153	12.5888	12.7182	8.67681	13.5997	13.6839	11.6916	9.58965	14.1066	12.0491	12.7252	10.8826	12.5738	11.0915				111.5	-0.12259	0.53684	0.12051	-0.97824	-0.27824	0.30658	0.92006	-0.86207	0.97518	-0.24592	-1.64366	0.13231	0.63391	0.58562	-0.16754	0.86131				111.5	4.41317	3.69773	4.92717	5.19525	4.51658	3.13802	5.26404	4.61025
	111.6	14.7673	11.9726	12.2364	12.4169	12.7686	8.79264	13.4152	13.5094	10.7915	9.47136	13.2291	12.43	12.7869	11.1675	12.6668	11.2276				111.6	-0.17531	0.51702	0.68762	-0.52188	0.09436	0.06936	1.75463	-1.04941	1.39527	-0.53252	-1.33747	0.13277	0.9409	-0.00148	-0.4712	-0.12214				111.6	4.30442	2.6806	4.82769	6.05674	4.68661	3.32177	4.61557	4.00643
	111.7	14.8317	11.7672	11.8959	12.1187	12.5297	8.13739	13.3077	13.0325	9.86736	9.58135	12.5471	12.8325	12.3851	11.2398	12.5735	11.6967				111.7	0.1323	0.50514	0.86843	0.5088	0.53462	-0.69872	1.70011	-0.93104	1.37451	-0.25483	-0.92922	-0.01004	1.01271	-0.66598	-0.45117	-0.99871				111.7	4.02872	2.04458	4.17818	5.84572	5.08284	3.34445	4.02163	3.60909
	111.8	14.7911	11.5561	11.2643	11.3271	11.9174	7.24306	13.2623	12.6945	10.2159	10.0546	11.9413	12.9629	11.7645	11.0496	12.1014	11.7215				111.8	0.39168	0.3399	0.38693	1.26937	0.98088	-1.2469	1.14945	-0.58222	0.68199	0.15644	-0.3538	0.01465	0.76635	-0.82954	-0.04388	-0.92768				111.8	4.04547	2.36528	3.73486	5.28718	5.13912	3.34095	4.17218	3.60476
	111.9	14.6911	11.4666	11.5834	10.6655	11.2676	6.90045	12.9657	12.4717	11.4575	10.9626	11.5994	12.8057	11.4728	10.87	11.4745	10.9482				111.9	0.26867	-0.12922	-0.31231	1.37673	1.08718	-1.42913	0.68857	0.08133	-0.29668	0.48102	0.31014	0.29221	0.05274	-0.44604	0.48938	-0.49159				111.9	4.3254	2.75024	3.54053	4.91053	4.96944	3.6333	4.71002	4.23103
	112	14.8084	11.4693	12.5762	10.6834	10.9952	7.20013	12.2664	12.0734	12.2691	11.5963	12.0321	12.6409	11.9095	10.8892	11.1667	9.74029				112	-0.01537	-0.28517	-0.4544	1.23163	0.95098	-1.62079	0.38507	0.9173	-0.96066	0.74749	0.84385	0.4608	-0.72593	-0.06684	0.62739	-0.56068				112	4.47569	2.52937	3.46381	4.75329	4.89962	3.8071	4.60963	5.15237
	112.1	15.2267	11.3065	12.8671	11.0391	11.1591	7.82869	11.4102	11.4373	12.2367	11.2287	12.8764	12.4643	12.6699	11.0867	11.2144	8.9073				112.1	-0.10838	0.11272	-0.06284	1.22343	0.76389	-1.69366	0.27148	1.35293	-0.90438	1.00061	0.85452	0.32072	-0.67542	0.15503	0.27155	-0.93066				112.1	4.34993	2.51251	3.96773	4.87543	4.99161	3.54585	3.99158	5.43073
	112.2	15.5673	10.6516	11.9598	11.0701	11.5517	8.65371	10.8279	10.7367	12.1959	10.36	13.3606	12.0933	13.0033	11.3834	11.3193	8.9579				112.2	0.00894	0.59762	0.2975	1.2348	0.40792	-1.47615	0.31463	1.06179	-0.27645	1.2488	0.22055	0.07081	0.1596	0.40462	0.24769	-0.96418				112.2	4.22387	3.29978	4.88805	5.36053	5.09619	3.40932	3.64455	4.94014
	112.3	15.4345	9.89081	10.8311	10.6745	11.8769	9.39374	10.9436	10.1869	12.8279	9.97478	13.5778	11.8728	12.6057	11.4976	11.1745	9.56794				112.3	0.02848	0.90621	0.20077	1.12829	-0.07899	-1.15734	0.25037	0.34303	0.40481	1.44779	-0.57385	0.08551	0.8573	0.69261	0.87788	-0.68472				112.3	4.06874	4.39257	5.20785	5.82409	4.83001	3.63769	3.61676	4.41758
	112.4	14.7487	9.66304	10.3742	10.2541	11.665	9.83296	11.838	9.82444	13.4928	10.4752	13.6345	12.3294	11.8084	11.2999	10.6651	10.4178				112.4	-0.19655	0.91058	-0.17423	1.10172	-0.52756	-0.77909	0.03328	-0.47943	0.75371	1.42025	-0.79812	0.37118	0.86202	0.89482	1.22719	-0.51278				112.4	3.39152	5.28728	4.6246	5.60875	4.26079	3.68683	3.71248	4.44903
	112.5	14.1165	9.92051	10.3753	10.2435	10.9081	9.96668	12.9333	9.42546	13.2087	11.5386	13.2572	13.1805	11.2561	11.1136	10.3054	11.4197				112.5	-0.45289	0.66962	-0.24028	1.26496	-1.06155	-0.20207	-0.05824	-1.19791	0.73316	0.9706	-0.22218	0.51049	0.29191	0.82009	0.86067	-0.70547				112.5	2.45927	5.97266	3.86822	4.82331	4.01152	3.41579	3.96663	5.04911
	112.6	14.3709	10.4704	10.4225	10.9531	10.2919	9.67507	13.5584	9.13564	11.9048	12.2909	12.639	13.556	11.2663	11.1048	10.4946	12.2418				112.6	-0.54123	0.50542	0.05464	1.46823	-1.55139	0.50893	0.10962	-1.38986	0.49467	0.36776	0.46481	0.22051	-0.48124	0.32616	0.51486	-1.18107				112.6	2.24224	6.3457	3.38088	4.10703	4.19583	3.34187	4.32223	5.49388
	112.7	15.2856	11.3714	10.5159	12.2952	10.2982	8.8606	13.4891	9.5403	10.3674	12.4913	12.1942	13.333	11.7047	11.271	10.6516	12.7674				112.7	-0.43031	0.53795	0.17182	1.50063	-1.41214	1.02924	0.3584	-1.09744	0.3978	0.19289	0.67222	-0.09057	-1.05262	-0.26217	0.59564	-1.49568				112.7	2.76354	5.98367	2.83148	3.61673	4.30582	3.6731	4.86091	4.87661
	112.8	16.0068	12.3761	10.6386	13.563	10.8559	7.77213	13.0365	10.6326	9.56433	12.8301	11.9631	13.029	12.2783	11.8067	10.4636	13.0543				112.8	-0.15837	0.39936	-0.09157	1.17588	-0.64721	1.11711	0.63233	-0.88247	0.80168	0.51094	0.59652	0.23382	-1.06476	-0.42697	0.50956	-1.25519				112.8	3.15838	5.13394	1.94584	3.30386	4.05718	4.24368	5.30538	3.68504
	112.9	16.1286	13.0132	10.722	14.195	11.535	6.96371	12.7681	11.4785	9.52143	13.5834	12.0369	12.687	12.7075	12.5009	10.7552	13.0239				112.9	0.09172	-0.35801	-0.36278	0.24258	0.05039	0.84297	1.09214	-0.90826	1.21142	0.70943	0.43913	0.80347	-0.68404	-0.44329	-0.0693	-0.58533				112.9	3.1866	4.52935	1.09186	3.24116	3.7248	4.71228	4.86583	3.30006
	113	15.6501	13.0118	10.7353	14.3704	11.8921	6.89509	12.8727	11.6466	9.6436	14.034	12.7339	12.2413	12.8328	12.5875	12.0232	12.7728				113	0.13105	-1.34527	-0.31365	-1.17588	0.27388	0.27229	1.60025	-0.95625	0.92693	0.26575	0.39208	0.72787	-0.45123	-0.74623	-0.63607	0.1932				113	3.31126	4.20611	1.03714	3.45011	3.66851	4.38091	3.58976	3.8327
	113.1	14.8478	12.2998	10.5674	14.3111	11.8147	7.38301	12.9377	11.7882	10.0114	13.3125	13.7737	12.1222	12.7368	11.8436	13.3918	12.538				113.1	-0.08412	-1.6072	-0.06592	-2.21012	0.14496	-0.40489	1.62801	-0.86314	0.23004	-0.55567	0.74585	0.23387	-0.52421	-0.93469	-0.83625	0.75778				113.1	3.79795	3.94564	2.05467	3.92074	3.94583	3.12448	2.49555	4.23563
	113.2	14.071	11.2081	10.2408	14.0302	11.553	7.91964	12.3994	12.2177	11.0554	11.736	14.2241	12.4918	12.6891	11.0047	13.8568	12.4009				113.2	-0.35694	-0.9442	0.03986	-1.94956	0.07868	-0.66321	0.99623	-0.63663	-0.25678	-0.88582	1.1837	0.0426	-0.56248	-0.57983	-0.72631	0.84678				113.2	4.40356	3.92559	3.65697	4.17809	4.48967	1.92075	2.10787	4.02755
	113.3	13.6044	10.2501	9.75117	13.6248	11.5468	8.38132	11.4944	12.433	12.5156	10.5036	13.5096	12.8932	12.9172	10.7887	13.452	12.374				113.3	-0.46332	0.1127	-0.16424	-0.37743	0.52419	-0.35126	0.3765	-0.53706	-0.14067	-0.28131	1.18018	0.29648	-0.13643	0.01625	-0.22215	0.56826				113.3	4.81239	3.83489	4.85007	3.7789	5.14594	1.65619	2.19574	3.31839
	113.4	13.583	9.64492	9.16531	12.9979	12.0116	8.8519	11.0572	12.0605	13.6135	10.2911	12.2361	13.0541	13.165	11.096	12.9036	12.3597				113.4	-0.38379	0.98747	-0.57785	1.60494	1.20026	0.10382	0.55097	-0.59642	0.50082	0.6496	0.76815	0.85077	0.72109	0.37103	0.43902	0.16994				113.4	4.92256	3.2799	4.68819	3.04888	5.64788	2.18856	2.58452	2.35294
	113.5	13.4999	9.30733	9.07432	11.8545	12.559	9.3192	11.1912	11.3067	13.8735	10.9067	11.6041	13.1167	12.808	11.4879	12.59	11.9692				113.5	-0.08689	1.41318	-0.82227	2.80489	1.21318	0.27928	1.19805	-0.41875	0.87228	0.95736	0.34235	1.27101	1.48396	0.47251	0.69268	-0.25845				113.5	4.73509	2.71486	3.57597	2.6	5.6518	2.93317	3.1107	1.6072
	113.6	12.9662	9.29442	9.87596	10.2236	12.6456	9.73147	11.4071	10.5919	13.5234	11.4047	11.9588	13.0099	11.9944	11.8149	12.2415	11.1696				113.6	0.41001	1.52996	-0.68913	2.69279	0.49489	0.11762	1.39271	0.01879	0.43763	0.51437	0.13551	1.14084	1.59519	0.63324	0.65871	-0.57045				113.6	4.26308	2.76746	3.04475	2.70765	5.12446	3.40127	3.38335	1.6145
	113.7	12.676	9.63264	10.8497	8.65467	12.2118	9.71544	11.4621	10.1719	13.0173	10.9485	12.544	12.4297	11.6388	12.0832	11.5035	10.5179				113.7	0.8165	1.47002	-0.34578	1.88719	-0.00851	-0.08258	0.88793	0.33013	-0.29377	-0.05041	-0.04689	0.91172	0.76105	1.0345	0.81417	-0.44873				113.7	3.49824	3.41501	3.2798	3.1539	4.85944	3.38179	3.11379	2.45306
	113.8	13.0219	9.96115	10.9513	8.11623	11.5072	9.04722	11.3751	10.1806	12.3462	9.93383	12.8669	11.6773	11.9819	12.368	10.4912	10.3898				113.8	0.83854	1.36053	-0.06176	1.14157	0.26475	-0.10561	0.05697	0.39573	-0.66646	-0.35998	-0.4002	1.10031	-0.54517	1.4425	1.10525	0.21378				113.8	2.50184	4.09838	3.12518	3.50427	5.17972	3.08122	2.68506	3.64615
	113.9	13.405	9.85718	10.1974	9.07877	10.7803	8.21791	11.3421	10.3668	11.2889	9.27698	13.1638	11.4268	12.32	12.6355	9.80801	10.4859				113.9	0.51844	1.43636	-0.02994	0.45691	0.8632	-0.09623	-0.76818	0.49871	-0.69785	-0.4403	-0.68277	1.27035	-1.18667	1.33047	1.07921	0.92967				113.9	1.41821	4.58653	2.49592	3.60308	5.23141	2.83738	2.64013	4.59695
	114	13.7818	9.44555	9.54738	10.5245	10.1507	7.81896	11.4495	10.4567	10.0631	9.45918	13.3568	11.7883	12.3819	12.5327	9.8423	10.512				114	0.24503	1.76089	-0.14	-0.43228	1.11973	-0.27746	-1.43643	0.88679	-0.60232	-0.25291	-0.48935	0.88676	-0.8727	0.6258	0.51904	1.07276				114	0.64825	4.87275	2.21832	3.58805	5.09254	2.70427	2.82721	4.88374
	114.1	14.5703	9.41249	9.92777	11.1908	9.69236	7.93007	11.3829	10.8655	9.06976	10.3519	12.9607	12.4872	12.6198	12.0589	10.2812	10.679				114.1	0.13602	2.12207	-0.14343	-1.2354	1.01324	-0.60015	-1.72006	1.31851	-0.35644	0.23969	0.16603	0.20012	-0.36264	-0.00517	-0.16564	0.79925				114.1	0.69691	4.83544	2.66698	3.65777	5.51569	2.59677	3.09521	4.37752
	114.2	15.5499	9.89334	11.2451	11.2566	9.59687	8.25339	10.9842	11.4575	8.67033	11.4002	11.9716	13.1585	13.1621	11.6944	10.7614	10.9778				114.2	-0.01768	2.04546	0.03752	-1.4175	0.82916	-0.7281	-1.23407	1.31858	0.05902	0.74938	0.70992	-0.22139	-0.0558	-0.22793	-0.29992	0.4854				114.2	1.47013	5.00401	3.76032	4.07538	5.91791	2.63139	3.77517	3.63942
	114.3	16.1889	10.0746	12.3068	11.4338	9.76362	8.68929	10.6362	11.3144	9.15009	11.9618	10.9989	13.437	13.7223	11.4145	11.3634	11.0655				114.3	-0.04089	1.30316	0.47336	-1.04709	0.44508	-0.40238	-0.10463	0.8585	0.51909	0.59365	0.69093	-0.18334	0.51264	-0.33259	0.15795	0.1658				114.3	2.35052	5.82903	4.96107	4.77027	5.55599	3.06596	4.50343	3.53509
	114.4	16.2988	9.40184	12.2254	11.5789	10.0527	9.45078	10.7053	10.6267	10.4195	11.7889	10.7029	13.3609	14.0352	10.8633	12.1414	10.9606				114.4	0.23705	0.47474	0.85536	-0.76243	-0.21439	-0.06574	0.94426	0.35899	0.78426	-0.3204	0.38827	0.08901	1.53698	-0.3714	0.53557	0.04385				114.4	3.06953	6.40405	5.33069	5.07642	4.73101	3.79921	4.57188	4.06294
	114.5	15.8976	8.31434	11.4688	11.4563	10.6598	10.4009	11.1614	10.3001	11.7197	11.3683	11.1903	13.1946	13.5171	10.1874	12.7541	10.8603				114.5	0.61072	0.21267	0.67079	-0.81961	-0.78681	-0.18868	1.62111	-0.05459	0.65117	-0.88266	0.29483	0.22533	2.05335	-0.31823	0.46045	0.26109				114.5	3.6238	5.99355	4.97098	4.49476	3.85424	4.45514	4.20369	4.40169
	114.6	15.312	7.6147	10.9804	11.4407	11.4266	10.7353	11.6656	10.3848	11.975	11.181	12.1307	12.9796	11.9024	9.98821	12.6822	10.7607				114.6	0.81636	0.42559	0.24137	-0.73583	-0.96679	-0.42164	2.02746	-0.41121	0.24465	-0.45213	0.29933	0.06792	1.29765	-0.41995	0.27533	0.5481				114.6	3.69814	5.16134	4.80409	3.48133	3.15963	5.16024	3.99579	4.24258
[truncated: 15,237 more rows]
[truncated: 79 more columns]
