# Supplementary material for: Conserved allosteric inhibition mechanism in SLC1 transporters
Source: eLife. 2023 Mar 1;12:e83464. doi: 10.7554/eLife.83464 (PMC10017108; doi:10.7554/eLife.83464)
Supplement: Table 1—source data 1. [file elife-83464-table1-data1.xlsx]

## Sheet: Sheet1
Table 1 original data		substrate Km
	WT-Ala		Relative Current (n=12)																		F135Y-Ala	Relative Current (n=9)																					F136Y-Ala	Relative Current (n=9)
		[Ala](uM)	exp1	exp2	exp3	exp4	exp5	exp6	exp7	exp8	exp9	exp10	exp11	exp12	ave	std						[Ala](uM)	exp1	exp2	exp3	exp4	exp5	exp6	exp7	exp8	exp9	ave	std											[Ala](uM)	exp1	exp2	exp3	exp4	exp5
		10	0.0755064	0.0522523	0.0680101	0.12037	0.00469484		0.137931	0.0465455	0.0447761	0.0212766	0.0520833	0.0302267	0.0594248	0.0399986						50	0.0165289	0.133929	0.148148	0.075	0.0754717	0.03125	0.0652174			0.077935	0.0486343											50	0.0232558	0.128571	0.0776699	0.0731707	0.21267
		20	0.00368324	0.0018018	0.0151134	0.101852	0.0140845	0.0101695	0.0965517	0.0712727	0.011194		0.078125	0.0503778	0.0412932	0.0391576						100	0.355372	0.392857	0.37037	0.45	0.377358	0.28125	0.26087	0.375	0.46875	0.370203	0.0677799											100	0.0930233	0.214286	0.150485	0.0878049	0.180995
		50			0.178841	0.287037		0.159322	0.324138	0.229818	0.231343		0.216146	0.24937	0.234502	0.0536318						200	0.363636	0.419643	0.518519	0.6	0.509434		0.369565	0.6	0.5	0.4851	0.0931368											200	0.325581	0.338095	0.373786	0.302439
		200	0.471455	0.484685	0.483627		0.450704	0.450847	0.558621	0.530909	0.477612	0.539007	0.539062	0.528967	0.501409	0.0386279						500	0.68595	0.696429	0.691358		0.754717			0.85	0.8125	0.748492	0.069751											500	0.651163	0.704762	0.68932	0.517073	0.769231
		1000	1	1	1	1	1	1	1	1	1	1	1	1	1	0						2000	1	1	1	1	1	1	1	1	1	1	0											2000	1	1	1	1	1
	WT-Ser		Relative Current (n=15)																		F135Y-Ser	Relative Current (n=12)																							Relative Current (n=20)
		[Ser](uM)	exp1	exp2	exp3	exp4	exp5	exp6	exp7	exp8	exp9	exp10	exp11	exp12	exp13	exp14	exp15	ave	std			[Ser](uM)	exp1	exp2	exp3	exp4	exp5	exp6	exp7	exp8	exp9	exp10	exp11	exp12	ave	std							F136Y-Ser	[Ser](uM)	exp1	exp2	exp3	exp4	exp5
		10	0.064833	0.0251799	0.134259	0.00769231	0.031746	0.0175219	0.0611511	0.008726	0	0.133005	0.0833333	0.0673499	0.055	0.0775194	0.052459	0.0546517	0.0415823			20	0.145833		0.121212	0.0970874	0.10951		0.0583713	0.145228	0.135036	0.159292			0.121446	0.0327144								20		0.0451264		0.0153846	0.0306122
		20	0.0903733	0.0539568	0.143519	0.0730769	0.047619	0.0450563	0.0647482	0.0837696	0.0904977	0.0837438	0.138889	0.0834553	0.06625	0.0568475	0.0655738	0.0791584	0.0291688			100	0.395833	0.33452	0.361305	0.398058	0.409222	0.403101	0.427107	0.427386	0.416058	0.451327	0.459627	0.43865	0.410183	0.0357807								100	0.234973	0.0902527	0.128049	0.138462	0.132653
		50	0.223969	0.188849	0.365741	0.223077	0.253968	0.151439	0.161871	0.164049	0.361991	0.26601	0.298611	0.349927	0.28625	0.206718	0.183607	0.245738	0.0736264			200		0.626335	0.617716	0.61165	0.619597	0.69509	0.676253	0.680498	0.587591				0.639341	0.0389796								200	0.308743	0.209386	0.29878	0.315385	0.255102
		200	0.524558	0.519784	0.601852	0.523077	0.534392	0.494368	0.492806	0.465969	0.565611	0.482759	0.375	0.518302	0.46625	0.434109	0.481967	0.49872	0.0538971			500	0.895833	0.864769	0.885781	0.936893					0.912409			0.966258	0.910324	0.0366783								500	0.527322	0.523466	0.60061	0.692308	0.755102
		1000	1	1	1	1	1	1	1	1	1	1	1	1	1	1	1	1	0			1000	1	1	1	1	1	1	1	1	1	1	1	1	1	0								1000	0.68306	0.714801	0.804878	0.815385	0.795918
																																												2000	1	1	1	1	1
	WT-Gln		Relative Current (n=13)
		[Gln](uM)	exp1	exp2	exp3	exp4	exp5	exp6	exp7	exp8	exp9	exp10	exp11	exp12	exp13	ave	std				F135Y-Gln	Relative Current (n=17)
		50	0.230769	0.145455	0.264516		0.240196	0.326316	0.323944	0.2625	0.285714	0.21519	0.238636	0.191558	0.14841	0.239434	0.0588272					[Gln](uM)	exp1	exp2	exp3	exp4	exp5	exp6	exp7	exp8	exp9	exp10	exp11	exp12	exp13	exp14	exp15	exp16	exp17	ave	std
		100	0.276923	0.252525	0.335484		0.259804	0.515789	0.309859		0.37594	0.227848	0.301136	0.308442	0.25159	0.310486	0.0803137					50	0.247368	0.101767	0.210728	0.296875	0.350427	0.235294		0.19186	0.242188	0.0545455	0.330317	0.123239	0.210145	0.210332	0.214575	0.229682	0.210145	0.216218	0.0767432
		200	0.561538	0.577778	0.819355		0.568627	0.557895	0.549296	0.5375	0.712782	0.64557	0.670455	0.655844	0.578092	0.619561	0.0842567					100	0.226316		0.279693	0.339844	0.34188	0.257353	0.388889	0.238372			0.411765	0.18662	0.202899	0.217712	0.311741	0.229682	0.235507	0.276305	0.0710521
		500	0.684615	0.814141	0.933333	0.6875		0.936842	0.753521	0.7875	0.93985	0.816456	0.75	0.853896	0.837456	0.816259	0.0896731					200		0.573852	0.701149	0.71875	0.713675	0.536765	0.766667			0.533058			0.786232	0.756458	0.724696	0.759717	0.688406	0.688285	0.0897979
		2000	1	1	1	1	1	1	1	1	1	1	1	1	1	1	0					500	0.673684	0.727915	0.770115	0.765625	0.773504	0.838235	0.8	0.872093	0.742188	0.88843	0.809955	0.820423	0.833333	0.771218	0.765182	0.773852	0.706522	0.784251	0.0562493
																						2000	1	1	1	1	1	1	1	1	1	1	1	1	1	1	1	1	1	1	0
[truncated: 55 more columns]
